# Supplementary material for: NKL Homeobox Genes NKX2-3 and NKX2-4 Deregulate Megakaryocytic-Erythroid Cell Differentiation in AML
Source: MDPI journal article supplement (doi:10.3390/ijms222111434), 2021-10-22
Supplement: s1 [file s1]

Figure S1: Public expression data of NKX2-4 and NKX2-3

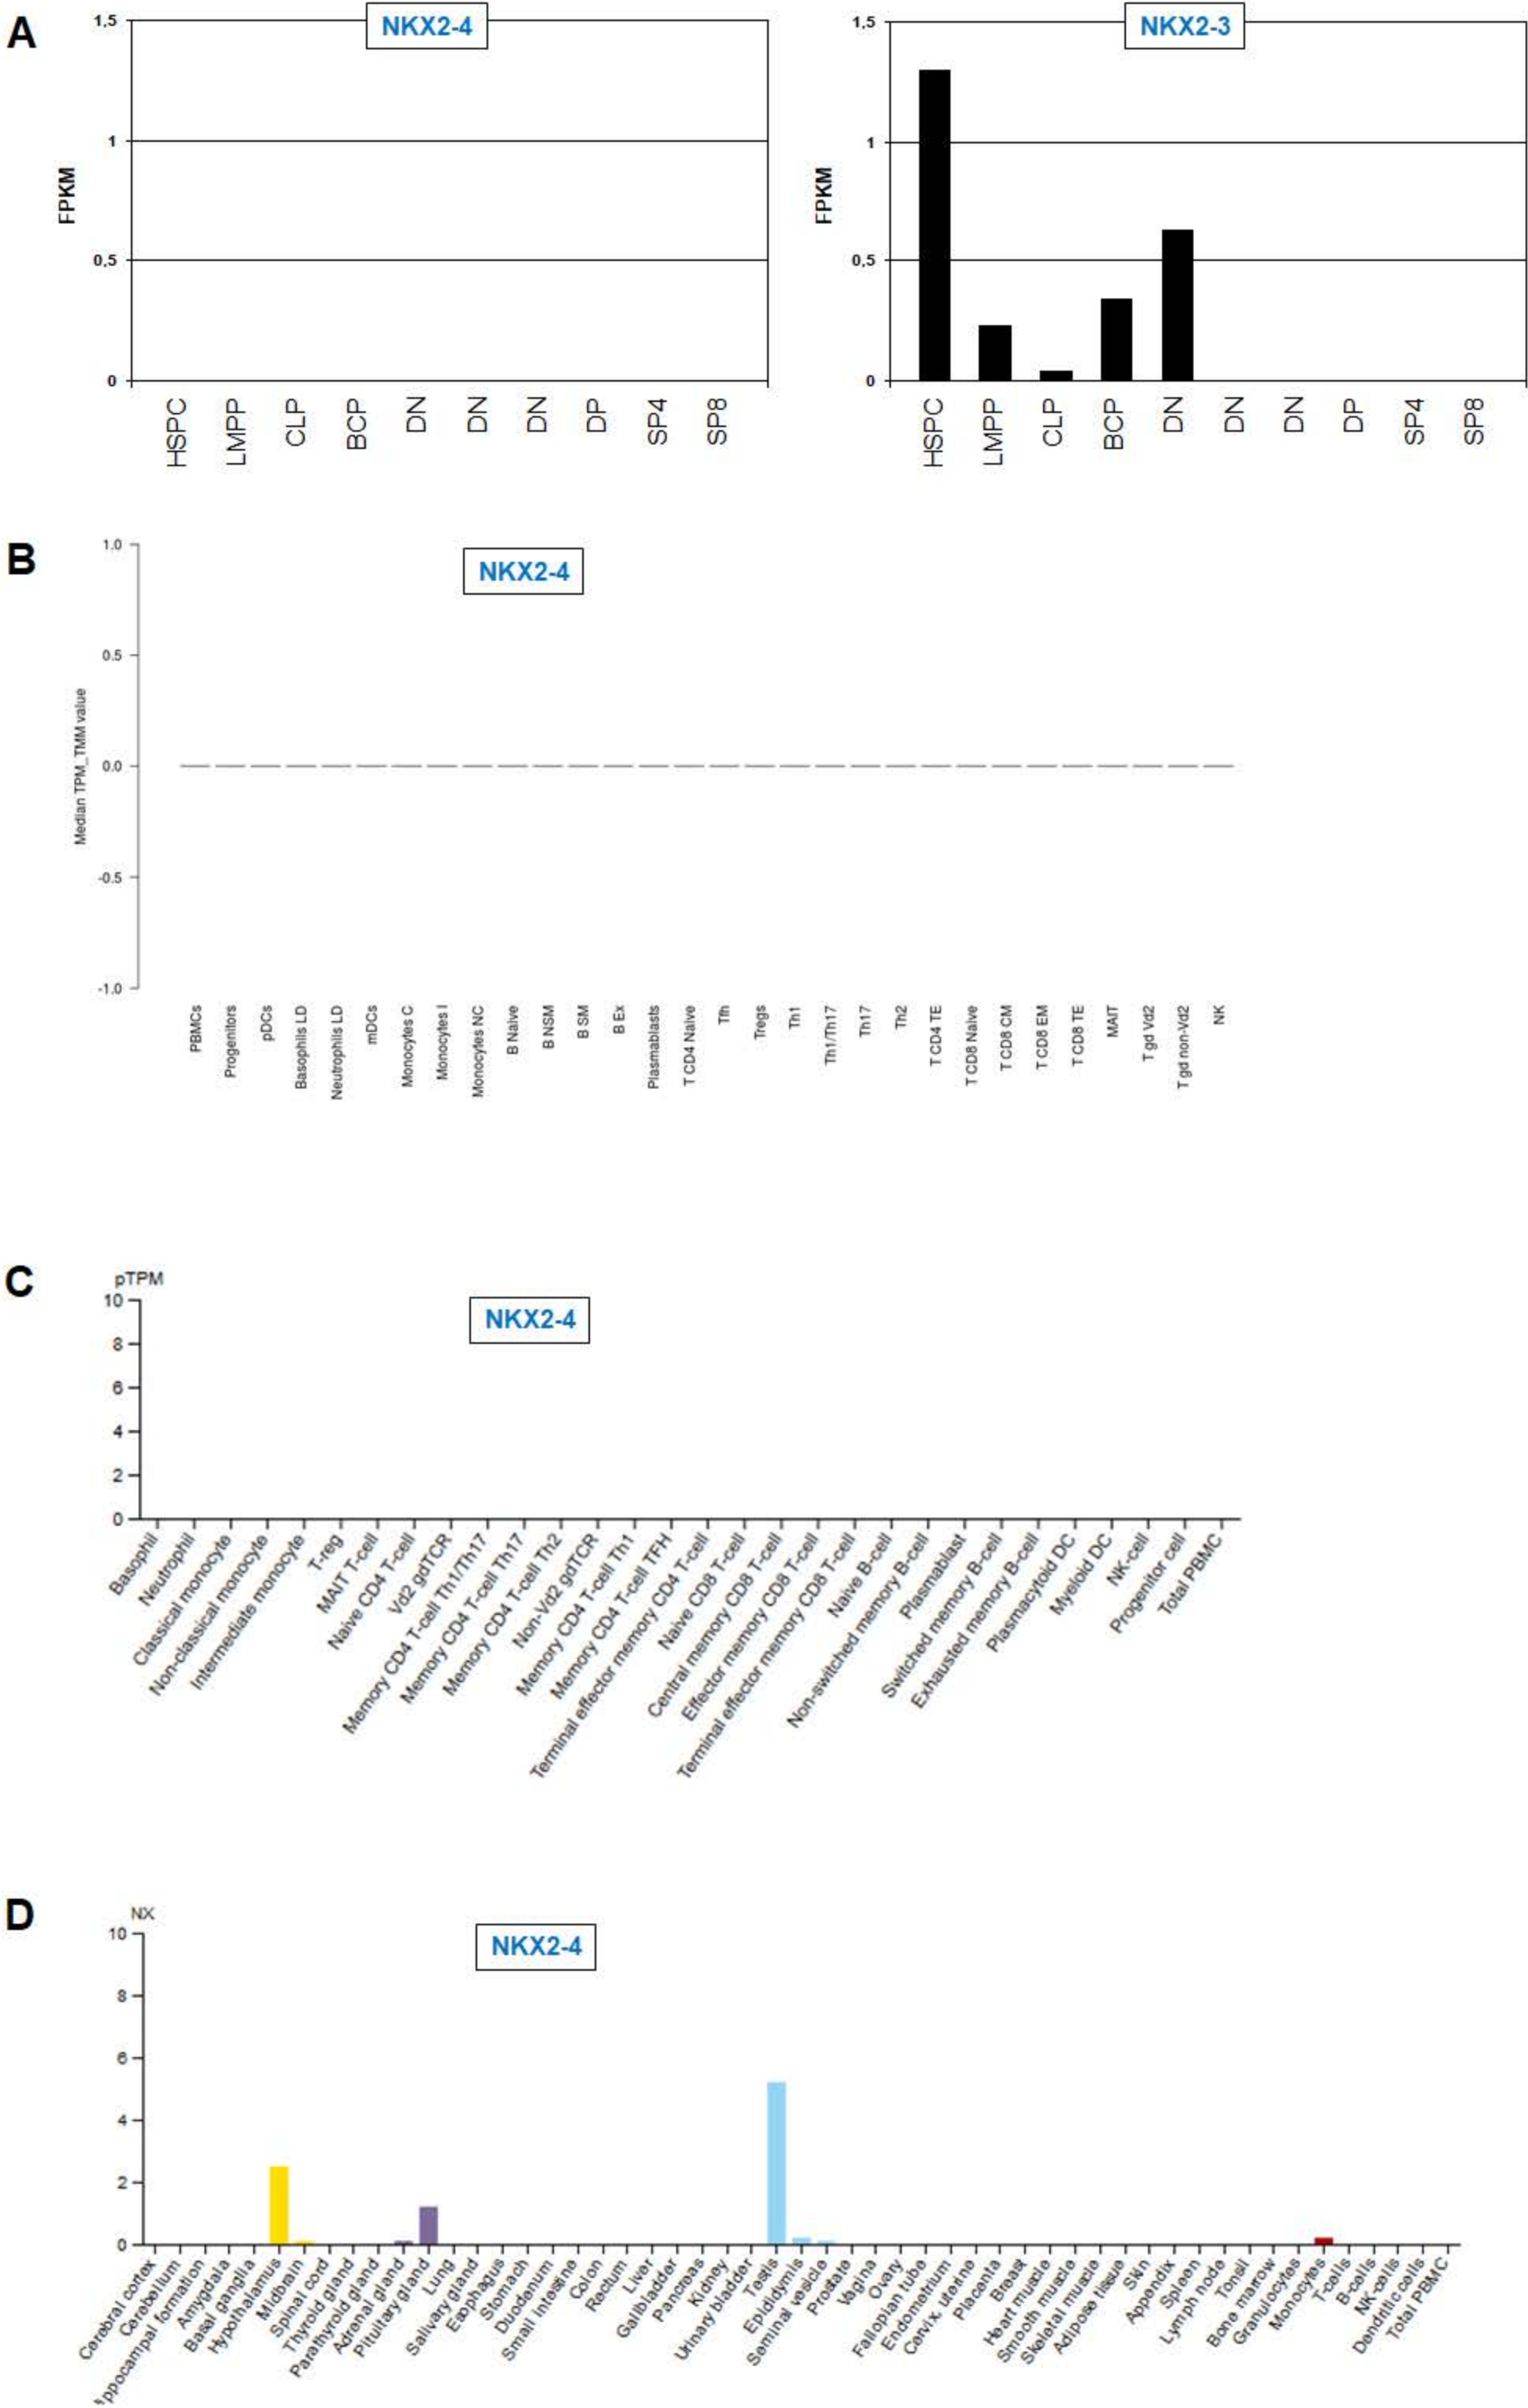

Figure S2: Copy number alterations in OCI-M2 and THP-1

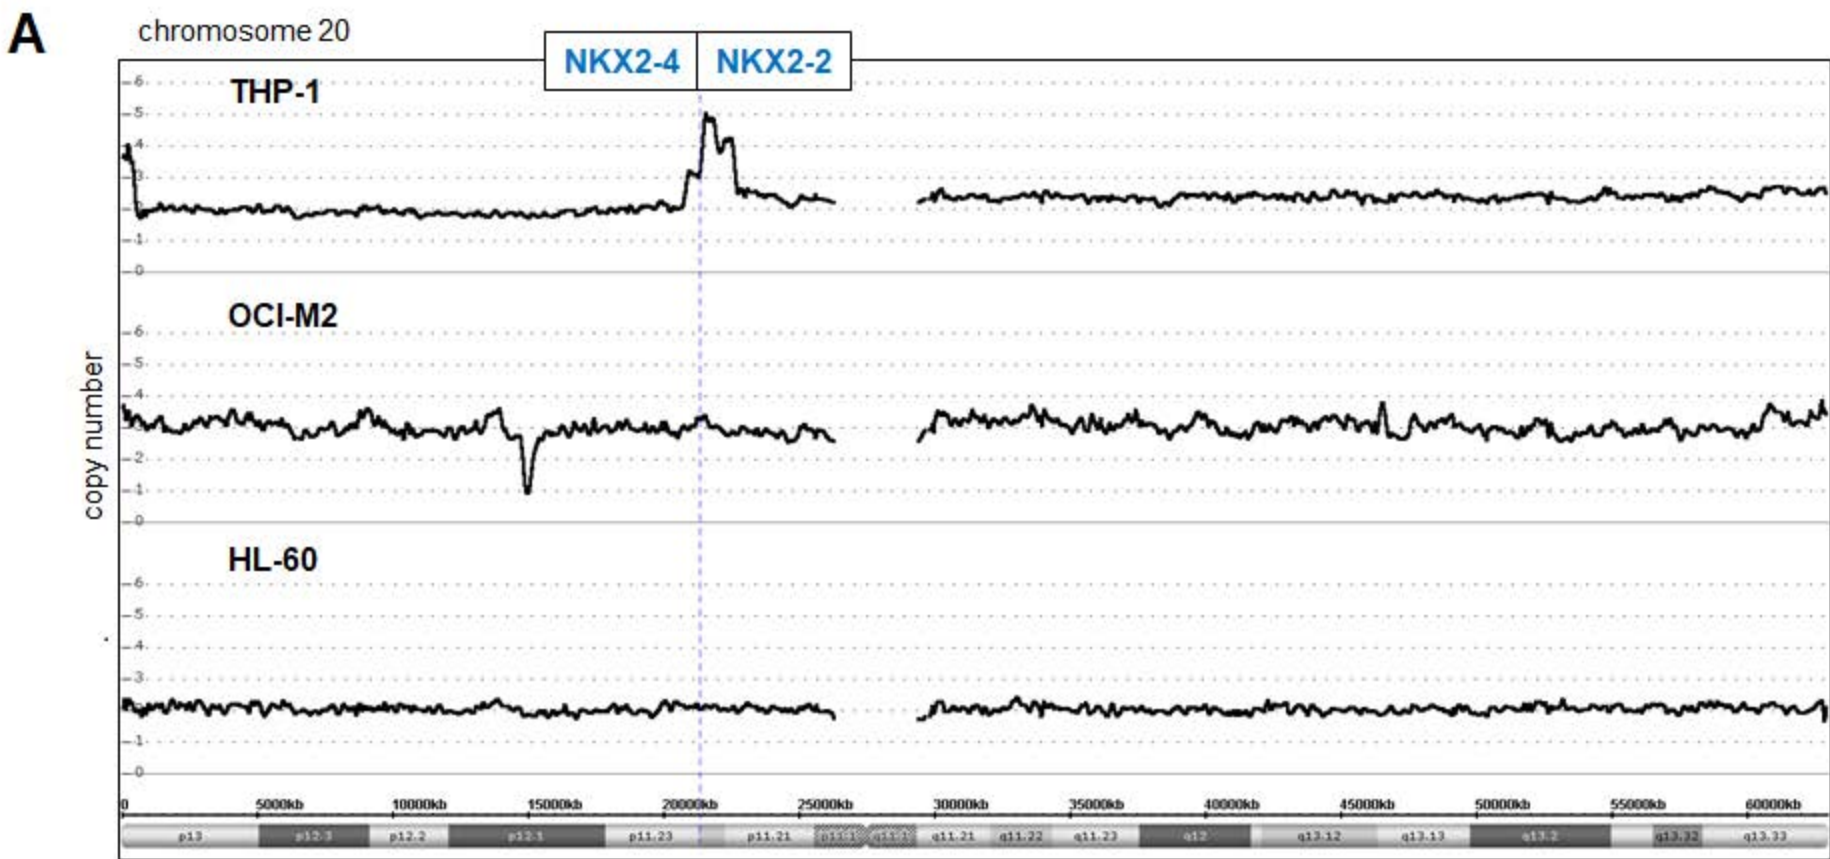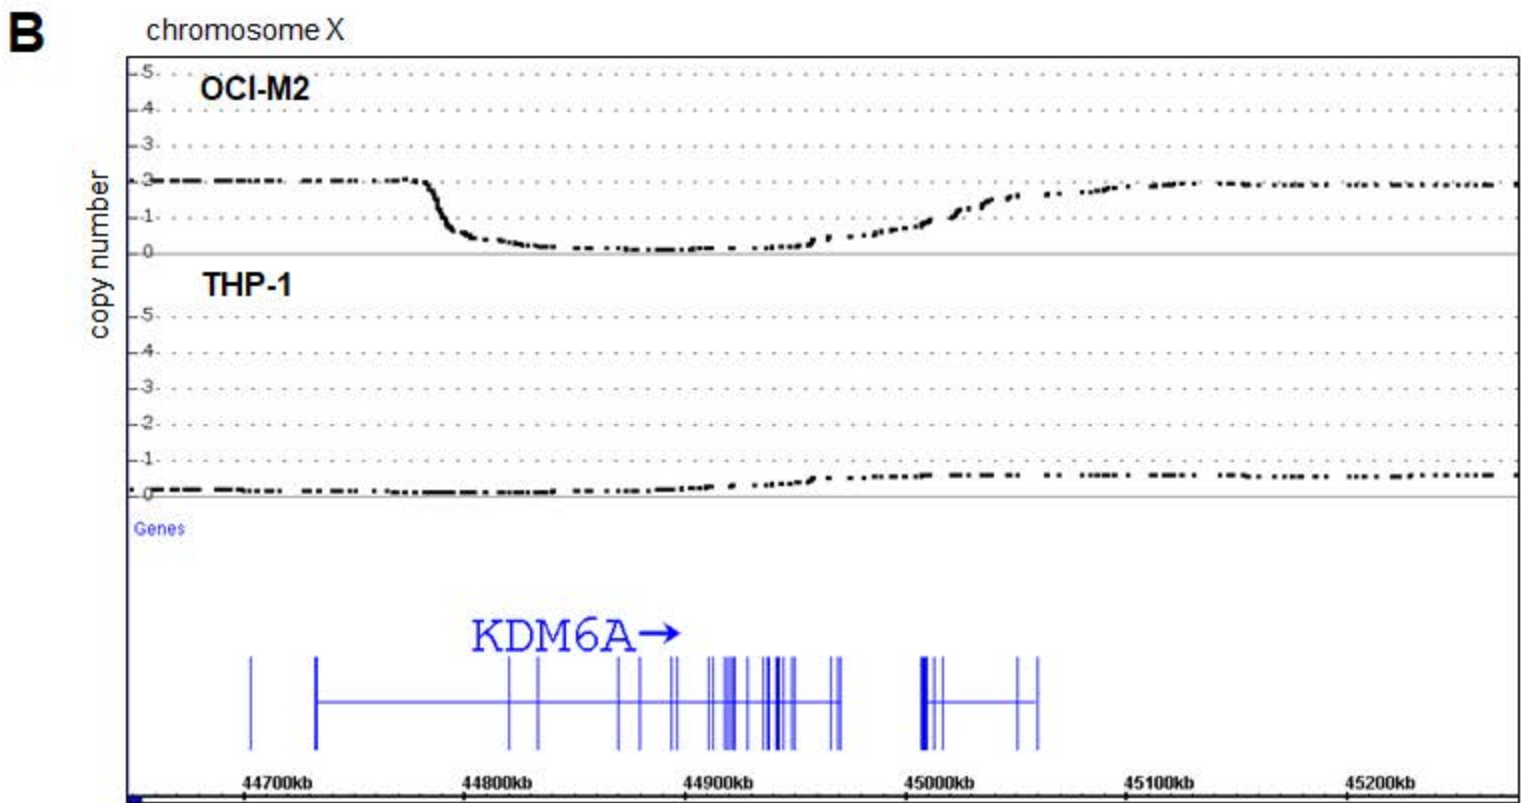



**Figure S3: Expression data from the LL-100 RNA-seq dataset**

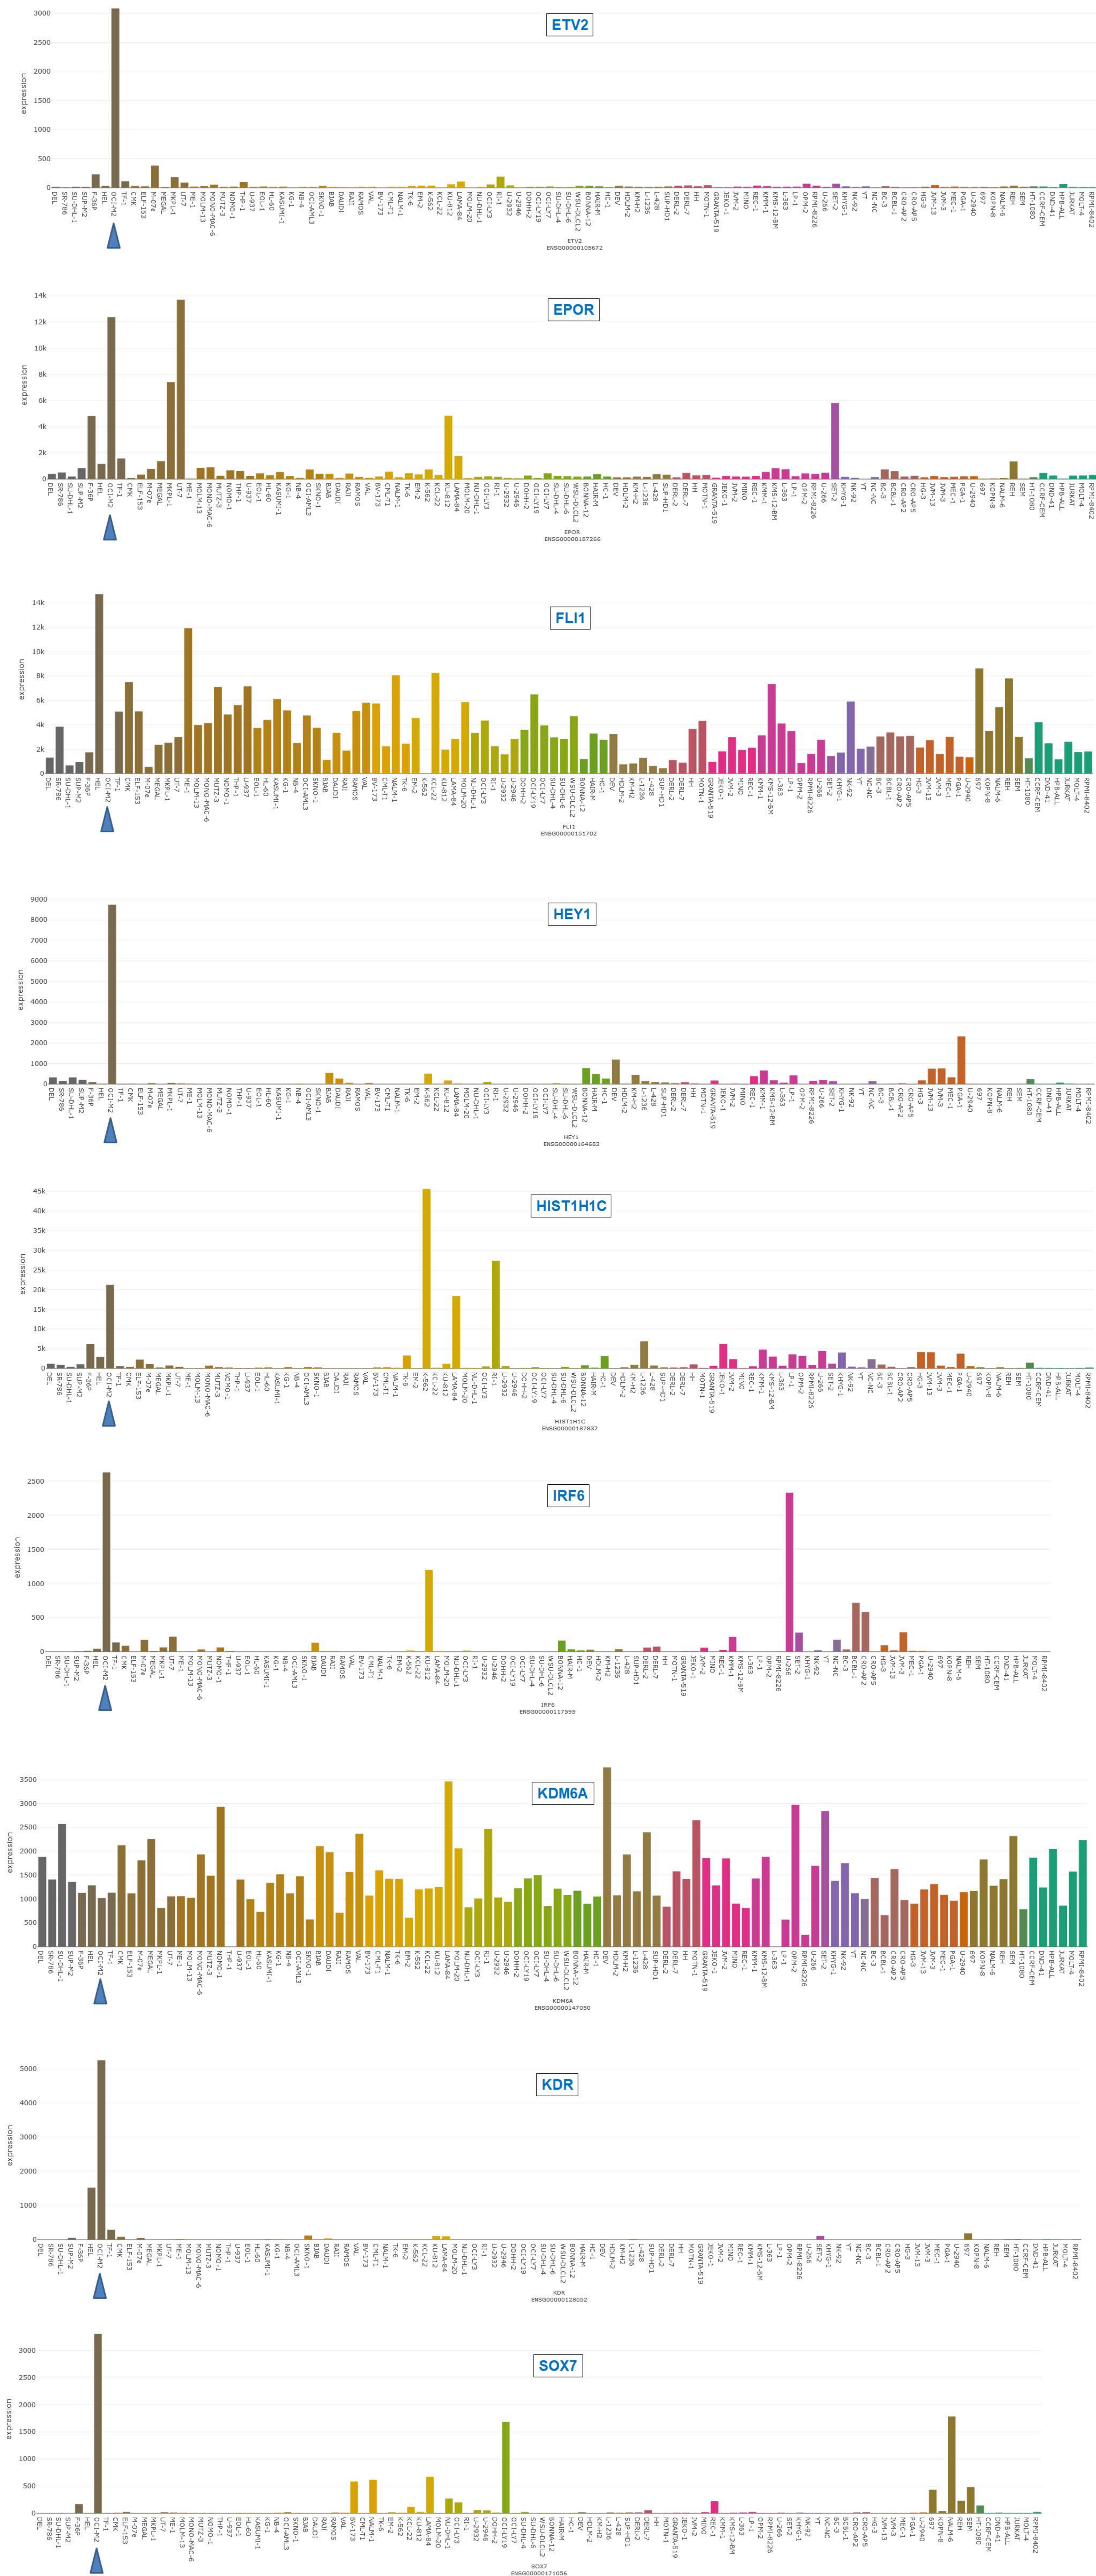



Figure S4: NKX2-3 expression in normal hematopoietic cells and AML patients

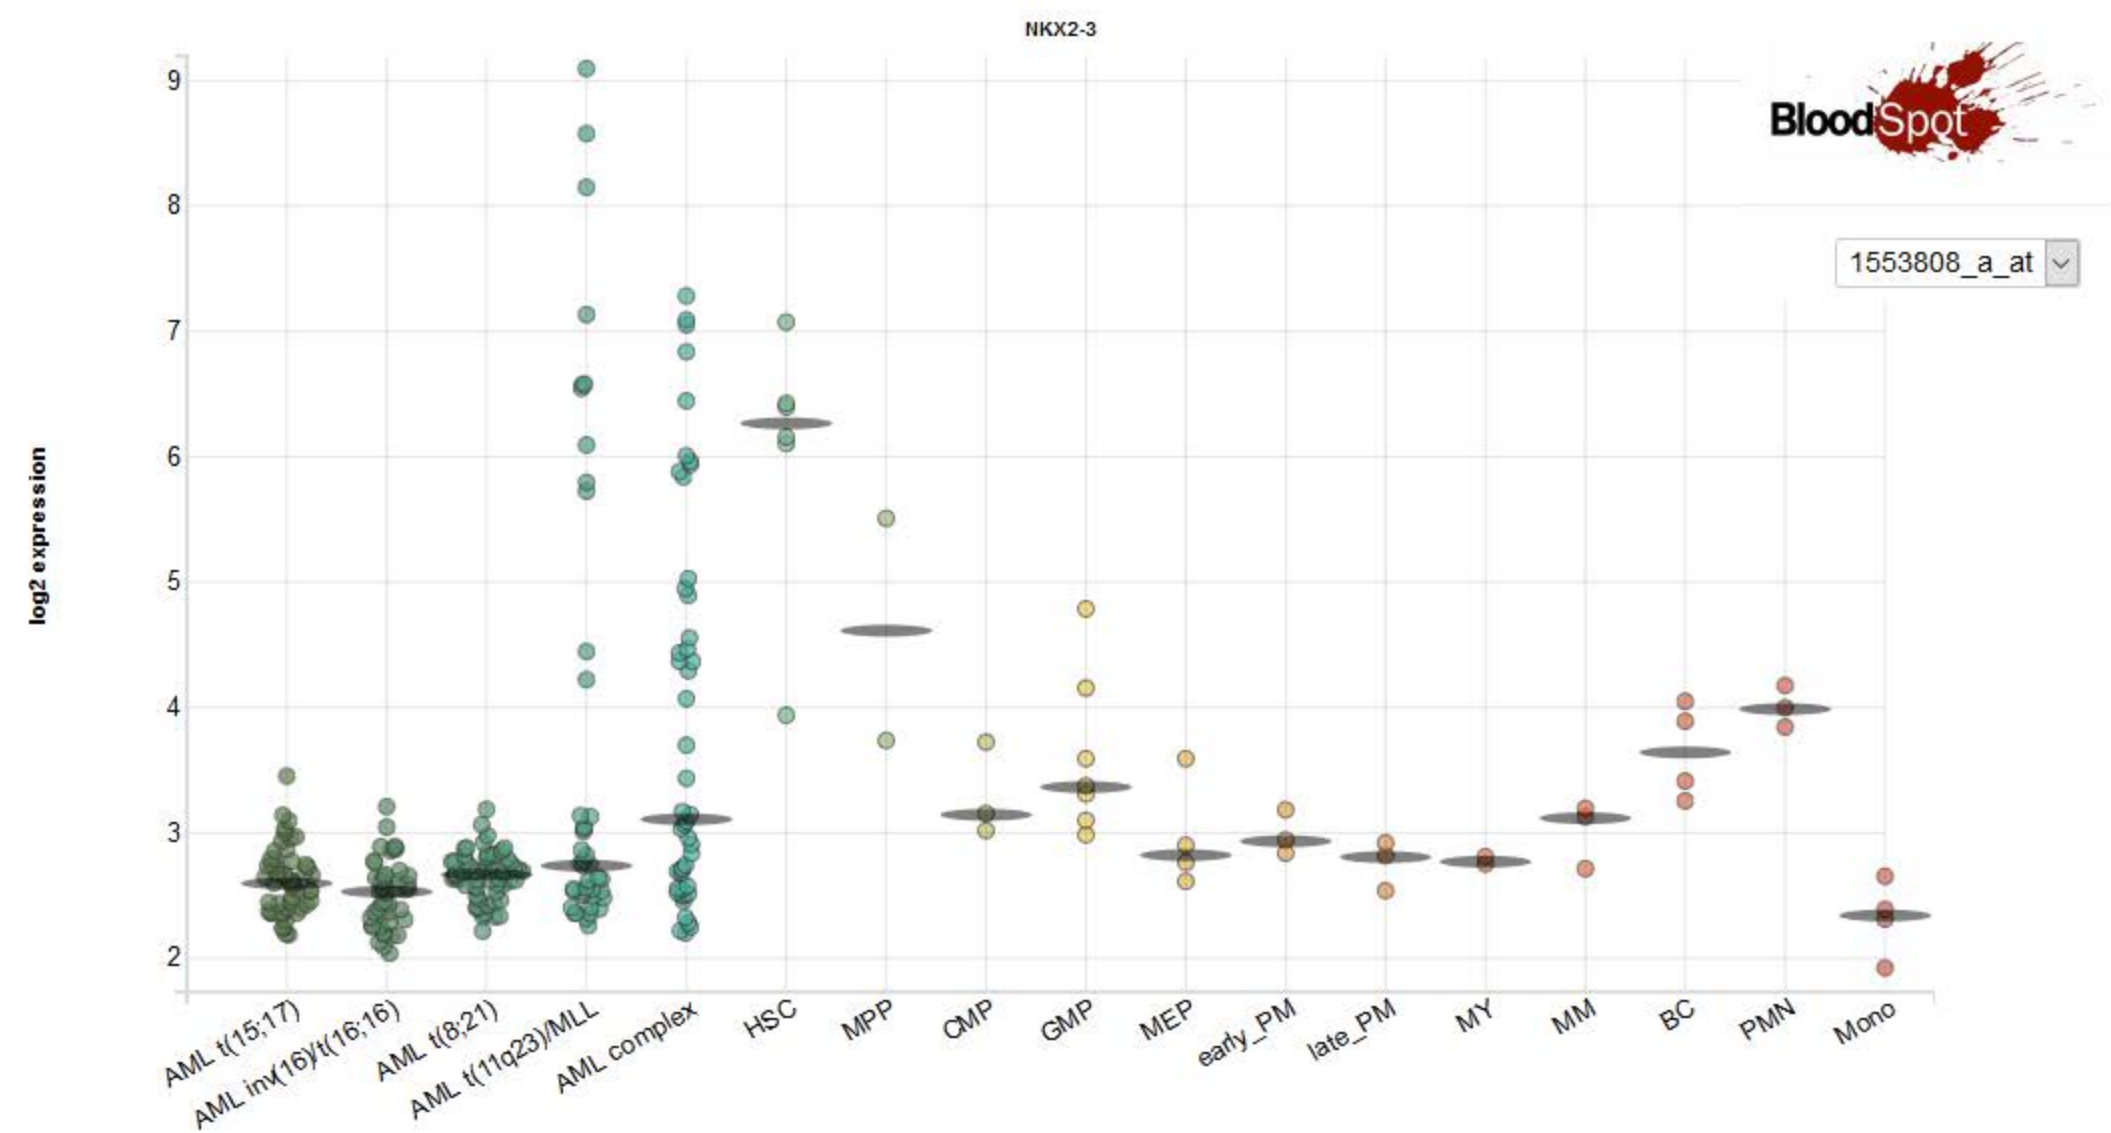

Human Normal Hematopoiesis are cells are from [GSE42519](#)  
Human AML cells are from [GSE13159](#)

| Abbreviation         | Name                                    | Immunophenotype                                             |
|----------------------|-----------------------------------------|-------------------------------------------------------------|
| AML t(15;17)         | AML with t(15;17)                       | Whole BM unsorted                                           |
| AML inv(16)/t(16;16) | AML with inv(16)/t(16;16)               | Whole BM unsorted                                           |
| AML t(8;21)          | AML with t(8;21)                        | Whole BM unsorted                                           |
| AML t(11q23)/MLL     | AML with t(11q23)/MLL                   | Whole BM unsorted                                           |
| AML complex          | AML with complex aberrant karyotype     | Whole BM unsorted                                           |
| HSC                  | Hematopoietic stem cell                 | Lin- CD34+ CD38- CD90+ CD45RA-                              |
| MPP                  | Multipotential progenitors              | Lin- CD34+ CD38- CD90- 45RA-                                |
| CMP                  | Common myeloid progenitor cell          | Lin- CD34+ CD38+ CD45RA- CD123+                             |
| GMP                  | Granulocyte monocyte progenitors        | Lin- CD34+ CD38+ CD45RA+ CD123+                             |
| MEP                  | Megakaryocyte-erythroid progenitor cell | Lin- CD34+ CD38+ CD45RA- CD123-                             |
| early_PM             | Early Promyelocyte                      | Lin- FSChi SSCint CD34- CD15int CD49dhi CD33hi CD11b- CD16- |
| late_PM              | Late Promyelocyte                       | Lin- FSChi SSChi CD34- CD15hi CD49dhi CD33hi CD11b- CD16-   |
| MY                   | Myelocyte                               | Lin- FSChi SSChi CD34- CD15hi CD49dhi CD33hi CD11bhi CD16-  |
| MM                   | Metamyelocytes                          | Lin- FSChi SSChi CD34- CD15hi CD49d- CD33- CD11bhi CD16-    |
| BC                   | Band cell                               | Lin- FSChi SSChi CD34- CD15hi CD49d- CD33- CD11bhi CD16int  |
| PMN                  | Polymorphonuclear cells                 | Lin- FSChi SSChi CD34- CD15hi CD49d- CD33- CD11bhi CD16hi   |
| Mono                 | Monocytes                               | CD14+ CD16-                                                 |



**Table S1: Comparative expression profiling data from AML cell lines (GSE59808)**

| ID           | adj.P.Val  | P.Value  | t     | B        | logFC  | Gene.symbol                    |
|--------------|------------|----------|-------|----------|--------|--------------------------------|
| 203528_at    | 0.00000502 | 9.31e-11 | -9.25 | 12.45459 | -6.63  | SEMA4D                         |
| 213025_at    | 0.00000502 | 3.04e-10 | -8.81 | 11.56025 | -5.56  | THUMPD1                        |
| 201859_at    | 0.00000502 | 3.45e-10 | -8.76 | 11.46491 | -8.38  | SRGN                           |
| 208933_s_at  | 0.00000502 | 3.67e-10 | -8.74 | 11.41708 | -8.83  | LGALS8                         |
| 1559584_a_at | 0.00000833 | 7.62e-10 | -8.47 | 10.85751 | -11.28 | C16orf54                       |
| 219676_at    | 0.00000968 | 1.06e-09 | -8.35 | 10.6006  | -6.51  | ZSCAN16                        |
| 210012_s_at  | 0.0000275  | 3.52e-09 | -7.91 | 9.66586  | -5.13  | EWSR1                          |
| 208934_s_at  | 0.00003573 | 5.23e-09 | -7.77 | 9.3544   | -7.61  | LGALS8                         |
| 225407_at    | 0.00004062 | 6.69e-09 | -7.69 | 9.15998  | -7.25  | MBP                            |
| 208936_x_at  | 0.00012516 | 2.29e-08 | -7.26 | 8.1789   | -5.72  | LGALS8                         |
| 243023_at    | 0.00037906 | 7.63e-08 | -6.84 | 7.20727  | -5.97  |                                |
| 1560552_a_at | 0.00047685 | 1.05e-07 | -6.73 | 6.94979  | -5.4   |                                |
| 209278_s_at  | 0.0006454  | 1.53e-07 | 6.6   | 6.63745  | 9.23   | TFPI2                          |
| 44783_s_at   | 0.00072285 | 1.85e-07 | 6.54  | 6.48409  | 6.8    | HEY1                           |
| 210136_at    | 0.00108754 | 2.98e-07 | -6.37 | 6.09227  | -7.5   | MBP                            |
| 228698_at    | 0.0016133  | 4.72e-07 | 6.22  | 5.71418  | 6.32   | SOX7                           |
| 201213_at    | 0.00196862 | 6.12e-07 | -6.13 | 5.49961  | -4.42  | PPP1R7                         |
| 216516_at    | 0.00218751 | 7.20e-07 | -6.08 | 5.36504  | -4.48  |                                |
| 1562934_at   | 0.00275349 | 9.68e-07 | -5.98 | 5.12022  | -3.54  | LOC101927460                   |
| 243537_at    | 0.00275349 | 1.01e-06 | -5.96 | 5.08686  | -4.92  |                                |
| 201858_s_at  | 0.00276613 | 1.06e-06 | -5.95 | 5.04254  | -10.44 | SRGN                           |
| 202664_at    | 0.00379125 | 1.53e-06 | -5.82 | 4.74166  | -3.34  | WIPF1                          |
| 224013_s_at  | 0.00427698 | 1.80e-06 | 5.77  | 4.60417  | 7.1    | SOX7                           |
| 227783_at    | 0.00498109 | 2.19e-06 | -5.7  | 4.44152  | -4.05  | CCDC57                         |
| 205305_at    | 0.0055321  | 2.53e-06 | 5.65  | 4.31979  | 3.97   | FGL1                           |
| 213596_at    | 0.00580907 | 2.76e-06 | -5.62 | 4.24613  | -4.49  | CASP4                          |
| 206843_at    | 0.00580907 | 2.87e-06 | 5.61  | 4.21462  | 7.04   | CRYBA4                         |
| 206114_at    | 0.00650342 | 3.33e-06 | 5.56  | 4.08972  | 4.76   | EPHA4                          |
| 228458_at    | 0.00681846 | 3.62e-06 | -5.53 | 4.02073  | -5.46  | C6orf226                       |
| 229389_at    | 0.00710063 | 3.90e-06 | -5.51 | 3.95836  | -6.14  | ATG16L2                        |
| 204236_at    | 0.00711197 | 4.03e-06 | -5.5  | 3.92955  | -10.35 | FLI1                           |
| 209086_x_at  | 0.01115453 | 6.60e-06 | 5.33  | 3.5156   | 3.88   | MIR6756///MCAM                 |
| 208180_s_at  | 0.01115453 | 6.74e-06 | 5.32  | 3.49858  | 4.27   | HIST1H4H                       |
| 214472_at    | 0.01115453 | 6.94e-06 | 5.31  | 3.47423  | 4.49   | HIST1H3F///HIST1H3B///HIST1H3A |
| 1560493_a_at | 0.01151935 | 7.37e-06 | -5.29 | 3.4228   | -4.43  | CPXCR1                         |
| 218839_at    | 0.01232374 | 8.11e-06 | 5.26  | 3.34232  | 7.84   | HEY1                           |
| 222936_s_at  | 0.01273329 | 8.62e-06 | -5.24 | 3.29176  | -4.87  | DESI2                          |
| 219945_at    | 0.01300121 | 9.04e-06 | 5.23  | 3.25178  | 5.9    | DDX25                          |
| 1555301_a_at | 0.01323626 | 9.44e-06 | 5.21  | 3.21482  | 3.47   | DIP2A                          |
| 223323_x_at  | 0.01447326 | 1.06e-05 | -5.17 | 3.11825  | -3.78  | TRPM7                          |
| 240118_at    | 0.01682626 | 1.26e-05 | -5.11 | 2.97046  | -3.23  |                                |
| 226913_s_at  | 0.02160707 | 1.67e-05 | 5.02  | 2.73401  | 7.4    | SOX8                           |
| 208527_x_at  | 0.02160707 | 1.70e-05 | 5.01  | 2.71925  | 5.16   | HIST1H2BE                      |
| 243563_at    | 0.0220975  | 1.81e-05 | -4.99 | 2.66508  | -4.46  |                                |
| 230263_s_at  | 0.0220975  | 1.82e-05 | -4.99 | 2.66191  | -5.72  | DOCK5                          |
| 1562957_at   | 0.02337664 | 1.97e-05 | -4.96 | 2.59493  | -4.5   |                                |
| 208546_x_at  | 0.02337664 | 2.01e-05 | 4.96  | 2.57763  | 5.44   | HIST1H2BH                      |



|              |            |          |       |         |       |                          |
|--------------|------------|----------|-------|---------|-------|--------------------------|
| 211826_s_at  | 0.02667164 | 2.34e-05 | -4.91 | 2.44838 | -3.31 | AFF1                     |
| 1560204_at   | 0.02780928 | 2.49e-05 | 4.88  | 2.39562 | 3.65  | NT5DC4                   |
| 208579_x_at  | 0.02824386 | 2.58e-05 | 4.87  | 2.36542 | 5.36  | H2BFS                    |
| 1555315_a_at | 0.02859566 | 2.71e-05 | 4.86  | 2.32546 | 4.91  | MAK                      |
| 239501_at    | 0.02859566 | 2.72e-05 | -4.86 | 2.32177 | -5.62 |                          |
| 208490_x_at  | 0.03370593 | 3.27e-05 | 4.79  | 2.16651 | 4.48  | HIST1H2BC///HIST1H2BI/// |
| 230206_at    | 0.03473696 | 3.43e-05 | -4.78 | 2.12517 | -5.92 | DOCK5                    |
| 222886_at    | 0.03769634 | 3.79e-05 | -4.74 | 2.0404  | -2.73 | NSUN3                    |
| 1570621_at   | 0.03934896 | 4.03e-05 | -4.72 | 1.98879 | -5.29 |                          |
| 237484_at    | 0.03976446 | 4.15e-05 | -4.71 | 1.9649  | -4.71 | SMCO3                    |
| 244802_at    | 0.03985974 | 4.23e-05 | 4.71  | 1.94813 | 7.39  |                          |
| 217247_at    | 0.04278108 | 4.62e-05 | -4.68 | 1.87371 | -4.61 |                          |
| 237106_at    | 0.04305581 | 4.72e-05 | -4.67 | 1.85404 | -3.67 | SLC11A2                  |
| 209087_x_at  | 0.04980736 | 5.63e-05 | 4.61  | 1.70612 | 6.66  | MCAM                     |
| 227790_at    | 0.04980736 | 5.65e-05 | 4.61  | 1.70275 | 2.61  | UBE3D                    |
| 1554520_at   | 0.05049638 | 5.89e-05 | -4.59 | 1.66727 | -4.34 | LOC283861                |
| 210481_s_at  | 0.05049638 | 5.91e-05 | 4.59  | 1.66418 | 4.88  | CLEC4M                   |
| 1566720_at   | 0.05296609 | 6.51e-05 | -4.56 | 1.58247 | -4.78 | RPS10P7                  |
| 210716_s_at  | 0.05296609 | 6.53e-05 | -4.56 | 1.58013 | -3.21 | CLIP1                    |
| 243335_at    | 0.05296609 | 6.56e-05 | -4.56 | 1576    | -3.79 | P4HA1                    |
| 224138_at    | 0.05296609 | 6.59e-05 | -4.55 | 1.57225 | -2.99 | CBX2                     |
| 1552477_a_at | 0.05368575 | 6.78e-05 | 4.55  | 1.54842 | 6.65  | IRF6                     |
| 206110_at    | 0.05388343 | 6.90e-05 | 4.54  | 1.53263 | 5.42  | HIST1H3F///HIST1H3B///HI |
| 1563656_at   | 0.05388343 | 7.15e-05 | -4.53 | 1.50316 | -3.79 |                          |
| 205239_at    | 0.05388343 | 7.18e-05 | 4.53  | 1.4986  | 5.55  | AREG                     |
| 209398_at    | 0.05388343 | 7.19e-05 | 4.52  | 1.49749 | 5.85  | HIST1H1C                 |
| 203992_s_at  | 0.05864056 | 7.94e-05 | -4.49 | 1.41415 | -6.9  | KDM6A                    |
| 209858_x_at  | 0.06198538 | 8.50e-05 | -4.47 | 1.35568 | -4.24 | MPPE1                    |
| 232035_at    | 0.06198689 | 8.81e-05 | 4.46  | 1.32543 | 5.24  | HIST1H4H                 |
| 217486_s_at  | 0.06198689 | 8.83e-05 | -4.45 | 1.32333 | -3.67 | ZDHHC17                  |
| 239016_at    | 0.06198689 | 8.90e-05 | -4.45 | 1.3167  | -3.57 |                          |
| 244559_at    | 0.06198689 | 8.96e-05 | -4.45 | 1.31156 | -3.8  |                          |
| 206374_at    | 0.06274903 | 9.18e-05 | -4.44 | 1.2905  | -3.15 | LOC101927562///DUSP8     |
| 230841_at    | 0.06390267 | 9.47e-05 | -4.43 | 1.26449 | -3.14 |                          |
| 1560968_at   | 0.06519531 | 9.78e-05 | -4.42 | 1.23707 | -2.84 |                          |
| 228335_at    | 0.07126975 | 1.09e-04 | 4.38  | 1.14403 | 4.61  | CLDN11                   |
| 228113_at    | 0.07126975 | 1.09e-04 | -4.38 | 1.14097 | -6.47 | RAB37                    |
| 231341_at    | 0.07145992 | 1.11e-04 | 4.38  | 1.12866 | 5.54  | SLC35D3                  |
| 214554_at    | 0.07304539 | 1.15e-04 | 4.36  | 1.10009 | 3.89  | HIST1H2AL                |
| 238220_at    | 0.07426858 | 1.18e-04 | -4.35 | 1.07617 | -5.84 | KDM6A                    |
| 201136_at    | 0.07555602 | 1.23e-04 | -4.34 | 1.0448  | -7.22 | PLP2                     |
| 222067_x_at  | 0.07555602 | 1.23e-04 | 4.34  | 1.04227 | 4.61  | HIST1H2BD                |
| 1554544_a_at | 0.08347396 | 1.37e-04 | -4.3  | 0.94814 | -4.91 | MBP                      |
| 215510_at    | 0.08477632 | 1.42e-04 | 4.29  | 0.92035 | 3.85  | ETV2                     |
| 1561286_a_at | 0.08477632 | 1.43e-04 | 4.29  | 0.91328 | 3.14  | DIP2A                    |
| 206370_at    | 0.08477632 | 1.45e-04 | -4.28 | 0.90095 | -5.29 | PIK3CG                   |
| 203402_at    | 0.08477632 | 1.46e-04 | -4.28 | 0.89805 | -6.19 | KCNAB2                   |
| 203991_s_at  | 0.08497979 | 1.48e-04 | -4.28 | 0.88702 | -8.44 | KDM6A                    |
| 1562020_s_at | 0.08579732 | 1.51e-04 | 4.27  | 0.86758 | 6.48  | NT5DC4                   |
| 222692_s_at  | 0.08579732 | 1.53e-04 | -4.27 | 0.85931 | -3.4  | LOC101928615///FNDC3B    |



|              |            |          |       |           |       |                           |
|--------------|------------|----------|-------|-----------|-------|---------------------------|
| 236539_at    | 0.08579732 | 1.54e-04 | -4.26 | 0.85248   | -3.88 | PTPN22                    |
| 204953_at    | 0.08741484 | 1.58e-04 | 4.25  | 0.82799   | 5.66  | SNAP91                    |
| 220974_x_at  | 0.08889224 | 1.63e-04 | -4.25 | 0.80521   | -5.9  | SFXN3                     |
| 218824_at    | 0.09152001 | 1.71e-04 | 4.23  | 0.76417   | 6.55  | PNMAL1                    |
| 211340_s_at  | 0.09152001 | 1.71e-04 | 4.23  | 0.76364   | 6.53  | MIR6756///MCAM            |
| 214957_at    | 0.09218787 | 1.74e-04 | 4.22  | 0.74917   | 7.55  | ACTL8                     |
| 204401_at    | 0.09323089 | 1.77e-04 | -4.22 | 0.73141   | -3.5  | KCNN4                     |
| 1554485_s_at | 0.09572214 | 1.84e-04 | 4.2   | 0.70087   | 4.03  | TMEM37                    |
| 242761_s_at  | 0.09648945 | 1.89e-04 | 4.19  | 0.67824   | 3.01  | ZNF420                    |
| 202597_at    | 0.09648945 | 1.89e-04 | 4.19  | 0.67806   | 4.92  | IRF6                      |
| 227253_at    | 0.09802211 | 1.94e-04 | -4.18 | 0.65676   | -3.85 | CP                        |
| 205880_at    | 0.09860679 | 1.97e-04 | 4.18  | 0.64388   | 5.83  | PRKD1                     |
| 1556814_a_at | 0.0993747  | 2.00e-04 | -4.17 | 0.62953   | -4.21 |                           |
| 206555_s_at  | 0.10054104 | 2.04e-04 | -4.17 | 0.61193   | -2.26 | THUMPD1                   |
| 214455_at    | 0.10205353 | 2.09e-04 | 4.16  | 0.59162   | 4.94  | HIST1H2BC///HIST1H2BI///H |
| 1569431_at   | 0.103033   | 2.13e-04 | -4.15 | 0.57595   | -3.59 | PAFAH1B2                  |
| 202011_at    | 0.10338496 | 2.18e-04 | 4.14  | 0.55676   | 5.71  | TJP1                      |
| 208071_s_at  | 0.10338496 | 2.18e-04 | -4.14 | 0.5541    | -5.51 | LAIR1                     |
| 232188_at    | 0.10338496 | 2.20e-04 | -4.14 | 0.54935   | -3.28 | AKAP13                    |
| 1562019_at   | 0.10338496 | 2.21e-04 | 4.14  | 0.5435    | 8.74  | NT5DC4                    |
| 223434_at    | 0.10685102 | 2.31e-04 | -4.12 | 0.50825   | -6.25 | GBP3                      |
| 242904_x_at  | 0.10710577 | 2.33e-04 | -4.12 | 0.49906   | -3.36 |                           |
| 210869_s_at  | 0.10835306 | 2.40e-04 | 4.11  | 0.47526   | 7.27  | MIR6756///MCAM            |
| 209911_x_at  | 0.10835306 | 2.42e-04 | 4.11  | 0.46743   | 5.22  | HIST1H2BD                 |
| 1564280_x_at | 0.10835306 | 2.44e-04 | -4.1  | 0.46113   | -3.65 | LOC100133920              |
| 205296_at    | 0.10835306 | 2.44e-04 | -4.1  | 0.46113   | -2.61 | RBL1                      |
| 236684_at    | 0.10989777 | 2.50e-04 | -4.1  | 0.4389    | -3.46 | CNOT9                     |
| 242276_at    | 0.10989777 | 2.51e-04 | 4.09  | 0.4354    | 4.74  |                           |
| 218921_at    | 0.10990877 | 2.54e-04 | -4.09 | 0.42462   | -3.1  | SIGIRR                    |
| 221138_s_at  | 0.10990877 | 2.55e-04 | -4.09 | 0.42183   | -3.82 |                           |
| 227616_at    | 0.11041511 | 2.60e-04 | -4.08 | 0.40665   | -4.06 | BCL9L                     |
| 244592_at    | 0.11041511 | 2.61e-04 | -4.08 | 0.40465   | -6.25 |                           |
| 1559724_at   | 0.11195777 | 2.70e-04 | -4.07 | 0.37521   | -4.48 |                           |
| 210447_at    | 0.11195777 | 2.71e-04 | 4.07  | 0.37092   | 7.12  | GLUD2                     |
| 228032_s_at  | 0.11195777 | 2.72e-04 | -4.07 | 0.36804   | -3.79 | DENND1B                   |
| 210644_s_at  | 0.11195777 | 2.72e-04 | -4.07 | 0.36691   | -5.43 | LAIR1                     |
| 223979_x_at  | 0.11196478 | 2.77e-04 | 4.06  | 0.35391   | 3.11  | FTCD                      |
| 1562253_at   | 0.11196478 | 2.77e-04 | -4.06 | 0.35344   | -3.42 | SLC7A11-AS1               |
| 1558289_at   | 0.11196478 | 2.79e-04 | -4.06 | 0.34791   | -2.88 | RFT1                      |
| 221581_s_at  | 0.11301617 | 2.86e-04 | -4.05 | 0.32643   | -7.67 | LAT2                      |
| 207677_s_at  | 0.11301617 | 2.87e-04 | -4.05 | 0.32322   | -6.22 | NCF4                      |
| 204874_x_at  | 0.11301617 | 2.87e-04 | 4.05  | 0.32143   | 3.78  | BAIAP3                    |
| 1566285_at   | 0.11376958 | 2.93e-04 | -4.04 | 0.30456   | -4.52 |                           |
| 201924_at    | 0.11376958 | 2.93e-04 | -4.04 | 0.30365   | -3.09 | AFF1                      |
| 230207_s_at  | 0.11436306 | 2.97e-04 | -4.04 | 0.29282   | -4.4  | DOCK5                     |
| 205226_at    | 0.11436306 | 3.00e-04 | 4.03  | 0.28412   | 4.49  | PDGFRL                    |
| 202663_at    | 0.11436306 | 3.01e-04 | -4.03 | 0.28134   | -3.2  | WIPF1                     |
| 1556242_a_at | 0.11840364 | 3.14e-04 | -4.02 | 0.24596   | -2.97 | LOC100310756              |
| 223313_s_at  | 0.12122392 | 3.27e-04 |       | 4 0.21173 | 7.48  | SNORA11E///SNORA11D///H   |
| 220376_at    | 0.12122392 | 3.27e-04 | -4    | 0.21167   | -3.73 | LRRC19                    |



|              |            |          |       |    |          |       |                           |
|--------------|------------|----------|-------|----|----------|-------|---------------------------|
| 215235_at    | 0.12122392 | 3.28e-04 |       | -4 | 0.20857  | -4.1  | SPTAN1                    |
| 200621_at    | 0.12256891 | 3.34e-04 | -3.99 |    | 0.19347  | -3.82 | CSRP1                     |
| 221631_at    | 0.12572069 | 3.45e-04 | -3.98 |    | 0.16622  | -2.66 | CACNA1I                   |
| 208523_x_at  | 0.12910069 | 3.57e-04 | 3.97  |    | 0.13804  | 4.2   | HIST1H2BC///HIST1H2BI///H |
| 240336_at    | 0.12947571 | 3.62e-04 | 3.97  |    | 0.12599  | 6.5   | HBM                       |
| 243675_at    | 0.12947571 | 3.62e-04 | -3.97 |    | 0.1244   | -3.89 |                           |
| 241992_at    | 0.13061936 | 3.68e-04 | -3.96 |    | 0.11118  | -3.31 |                           |
| 1554929_at   | 0.13061936 | 3.74e-04 | -3.95 |    | 0.09666  | -3.35 | SIK3                      |
| 233087_at    | 0.13061936 | 3.77e-04 | -3.95 |    | 0.09164  | -3.93 | FBXL17                    |
| 224374_s_at  | 0.13061936 | 3.78e-04 | -3.95 |    | 0.08895  | -4.48 | EMILIN2                   |
| 201006_at    | 0.13061936 | 3.78e-04 | -3.95 |    | 0.08816  | -3.07 | PRDX2                     |
| 239816_at    | 0.13061936 | 3.81e-04 | -3.95 |    | 0.08075  | -3.43 | POLD3                     |
| 208585_at    | 0.13061936 | 3.82e-04 | -3.95 |    | 0.07893  | -4.09 | BTN2A3P                   |
| 1552703_s_at | 0.13080305 | 3.85e-04 | -3.94 |    | 0.07245  | -5.77 | CARD16///CASP1            |
| 1555733_s_at | 0.13152792 | 3.90e-04 | -3.94 |    | 0.06249  | -5.68 | AP1S3                     |
| 231367_s_at  | 0.13212775 | 3.94e-04 | -3.94 |    | 0.0534   | -3.94 |                           |
| 1565706_at   | 0.13272156 | 3.98e-04 | -3.93 |    | 0.0444   | -3.22 |                           |
| 226796_at    | 0.13304824 | 4.02e-04 | -3.93 |    | 0.03715  | -6.62 | ABHD15                    |
| 227196_at    | 0.13387015 | 4.07e-04 | 3.93  |    | 0.02587  | 7.04  | RHPN2                     |
| 207995_s_at  | 0.13387015 | 4.11e-04 | 3.92  |    | 0.01747  | 3.57  | CLEC4M                    |
| 238725_at    | 0.13387015 | 4.11e-04 | -3.92 |    | 0.01661  | -4.16 | IRF1                      |
| 221035_s_at  | 0.13461775 | 4.17e-04 | 3.92  |    | 0.00436  | 6.19  | TEX14                     |
| 230100_x_at  | 0.13461775 | 4.19e-04 | -3.92 |    | 0.00183  | -3.21 | PAK1                      |
| 203263_s_at  | 0.13649407 | 4.27e-04 | 3.91  |    | -0.0149  | 3.1   | ARHGEF9                   |
| 212810_s_at  | 0.13861196 | 4.36e-04 | -3.9  |    | -0.03293 | -3.86 | SLC1A4                    |
| 209269_s_at  | 0.14043807 | 4.44e-04 | -3.89 |    | -0.04897 | -3.57 | SYK                       |
| 232307_at    | 0.14415492 | 4.59e-04 | -3.88 |    | -0.07605 | -4.55 |                           |
| 230673_at    | 0.14458215 | 4.63e-04 | 3.88  |    | -0.08343 | 5.19  | PKHD1L1                   |
| 1559884_at   | 0.14676042 | 4.74e-04 | 3.87  |    | -0.10378 | 3.37  | CDKN2B-AS1                |
| 210634_at    | 0.14676042 | 4.75e-04 | -3.87 |    | -0.10577 | -3.22 | KLHL20                    |
| 218746_at    | 0.14824608 | 4.84e-04 | -3.86 |    | -0.12081 | -3.47 | TAPBPL                    |
| 1557529_at   | 0.14824608 | 4.85e-04 | -3.86 |    | -0.12387 | -3.12 | HECTD4                    |
| 204967_at    | 0.14953313 | 4.92e-04 | 3.86  |    | -0.13593 | 2.93  | SHROOM2                   |
| 203945_at    | 0.14999998 | 4.99e-04 | 3.85  |    | -0.14768 | 3.7   | ARG2                      |
| 229137_at    | 0.14999998 | 5.00e-04 | -3.85 |    | -0.14856 | -3.92 | FUCA1                     |
| 1569136_at   | 0.14999998 | 5.05e-04 | -3.85 |    | -0.15786 | -6.1  | MGAT4A                    |
| 207457_s_at  | 0.14999998 | 5.07e-04 | 3.85  |    | -0.16113 | 6.12  | LY6G6F///LY6G6D           |
| 207336_at    | 0.14999998 | 5.10e-04 | 3.85  |    | -0.16644 | 5.76  | SOX5                      |
| 233275_at    | 0.14999998 | 5.17e-04 | -3.84 |    | -0.17674 | -3.66 |                           |
| 204882_at    | 0.14999998 | 5.17e-04 | -3.84 |    | -0.17765 | -5.45 | ARHGAP25                  |
| 236044_at    | 0.14999998 | 5.18e-04 | 3.84  |    | -0.17996 | 5.55  | PLPP4                     |
| 234290_x_at  | 0.14999998 | 5.19e-04 | 3.84  |    | -0.18011 | 2.68  | MYH14                     |
| 217582_at    | 0.14999998 | 5.23e-04 | -3.84 |    | -0.18678 | -4.46 |                           |
| 209310_s_at  | 0.14999998 | 5.24e-04 | -3.84 |    | -0.18894 | -3.63 | CASP4                     |
| 231836_at    | 0.15467185 | 5.43e-04 | 3.82  |    | -0.21941 | 2.63  | HKR1                      |
| 210731_s_at  | 0.1563338  | 5.52e-04 | -3.82 |    | -0.23387 | -2.68 | LGALS8                    |
| 213433_at    | 0.1563338  | 5.55e-04 | -3.82 |    | -0.23728 | -2.8  | ARL3                      |
| 225156_at    | 0.15679159 | 5.59e-04 | 3.81  |    | -0.24413 | 2.82  | ELOF1                     |
| 206343_s_at  | 0.15752478 | 5.65e-04 | 3.81  |    | -0.25243 | 4.64  | NRG1                      |
| 204303_s_at  | 0.15904715 | 5.73e-04 | -3.8  |    | -0.26491 | -4.66 | CTIF                      |



|              |            |          |       |          |       |                         |
|--------------|------------|----------|-------|----------|-------|-------------------------|
| 205875_s_at  | 0.15980723 | 5.80e-04 | -3.8  | -0.27454 | -5.13 | ATRIP///TREX1           |
| 242161_at    | 0.15980723 | 5.83e-04 | -3.8  | -0.27901 | -4.2  |                         |
| 228677_s_at  | 0.15980723 | 5.85e-04 | -3.8  | -0.28178 | -5.92 | RASAL3                  |
| 218280_x_at  | 0.16064838 | 5.91e-04 | 3.79  | -0.29047 | 4.02  | HIST2H2AA4///HIST2H2AA3 |
| 238184_at    | 0.16368465 | 6.05e-04 | 3.79  | -0.31058 | 5.85  |                         |
| 238780_s_at  | 0.16577839 | 6.22e-04 | -3.78 | -0.3346  | -3.26 | KCNJ5                   |
| 221170_at    | 0.16577839 | 6.23e-04 | -3.77 | -0.33527 | -5.15 | HRH4                    |
| 236977_at    | 0.16577839 | 6.24e-04 | -3.77 | -0.33714 | -3.46 | LOC646588               |
| 235328_at    | 0.16577839 | 6.25e-04 | -3.77 | -338     | -3.43 | PLXNC1                  |
| 1555113_at   | 0.16908317 | 6.40e-04 | -3.76 | -0.35886 | -3.73 | PARD3B                  |
| 1569416_at   | 0.17265134 | 6.57e-04 | -3.76 | -0.38067 | -2.94 |                         |
| 209243_s_at  | 0.17462798 | 6.68e-04 | 3.75  | -0.39524 | 6.77  | PEG3                    |
| 227919_at    | 0.17462798 | 6.73e-04 | 3.75  | -0.40195 | 7.25  | UCA1                    |
| 218225_at    | 0.17462798 | 6.74e-04 | 3.75  | -0.40248 | 2.42  | ECSIT                   |
| 1554043_a_at | 0.17697541 | 6.86e-04 | 3.74  | -0.41782 | 3.3   |                         |
| 201131_s_at  | 0.17745328 | 6.91e-04 | 3.74  | -0.4241  | 7.99  | CDH1                    |
| 226765_at    | 0.17817143 | 6.98e-04 | -3.73 | -0.43233 | -6.04 | SPTBN1                  |
| 232663_s_at  | 0.17817143 | 7.01e-04 | -3.73 | -0.43545 | -4.28 | UBAP1L                  |
| 241538_at    | 0.18169859 | 7.20e-04 | 3.72  | -0.45885 | 4.95  |                         |
| 65086_at     | 0.18169859 | 7.21e-04 | 3.72  | -0.45993 | 2.29  | YIPF2                   |
| 242292_at    | 0.18339111 | 7.31e-04 | 3.72  | -0.4717  | 4.59  | FAM226B///FAM226A       |
| 1559902_at   | 0.18342727 | 7.35e-04 | -3.72 | -0.47575 | -2.94 | MKL1                    |
| 230903_s_at  | 0.18612034 | 7.49e-04 | 3.71  | -0.49197 | 5.48  | TDRP                    |
| 205924_at    | 0.19031559 | 7.69e-04 | 3.7   | -0.51473 | 2.78  | RAB3B                   |
| 1554690_a_at | 0.19269883 | 7.82e-04 | -3.69 | -0.52911 | -2.77 | TACC1                   |
| 205104_at    | 0.19387241 | 7.91e-04 | 3.69  | -0.53807 | 4.83  | SNPH                    |
| 209933_s_at  | 0.19690827 | 8.09e-04 | -3.68 | -0.55786 | -6.74 | CD300A                  |
| 230574_at    | 0.19690827 | 8.10e-04 | 3.68  | -0.55897 | 4.13  | LOC100130938            |
| 238884_at    | 0.19690827 | 8.17e-04 | -3.68 | -566     | -5.76 |                         |
| 1560758_at   | 0.19690827 | 8.23e-04 | -3.68 | -0.57186 | -4.43 |                         |
| 1561161_at   | 0.19690827 | 8.24e-04 | -3.67 | -0.57333 | -3.26 |                         |
| 213122_at    | 0.19690827 | 8.25e-04 | 3.67  | -0.57376 | 6.77  | TSPYL5                  |
| 241917_at    | 0.19712455 | 8.29e-04 | -3.67 | -0.57838 | -3.28 |                         |
| 1556283_s_at | 0.20024334 | 8.46e-04 | -3.67 | -0.59537 | -2.85 | FGFR1OP2                |
| 218154_at    | 0.20054478 | 8.51e-04 | -3.66 | -0.6003  | -3.96 | GSDMD                   |
| 206060_s_at  | 0.20140435 | 8.59e-04 | -3.66 | -0.60827 | -3.2  | PTPN22                  |
| 227427_at    | 0.20140435 | 8.62e-04 | 3.66  | -0.61121 | 4.75  | ARHGEF25                |
| 37892_at     | 0.21325222 | 9.17e-04 | 3.64  | -0.66327 | 8.56  | COL11A1                 |
| 236678_at    | 0.21343448 | 9.21e-04 | -3.63 | -0.6676  | -3.8  |                         |
| 1569352_at   | 0.21447708 | 9.30e-04 | -3.63 | -0.67531 | -3.65 | FNIP2                   |
| 203934_at    | 0.21682953 | 9.44e-04 | 3.63  | -0.68812 | 6.24  | <b>KDR</b>              |
| 1563474_at   | 0.21823635 | 9.54e-04 | -3.62 | -0.69716 | -2.88 | ETFBKMT                 |
| 202856_s_at  | 0.21913078 | 9.62e-04 | -3.62 | -0.70443 | -4.74 | MIR6787///SLC16A3       |
| 208076_at    | 0.21913078 | 9.66e-04 | 3.62  | -0.70768 | 2.35  | HIST1H4D                |
| 1552701_a_at | 0.21921761 | 9.73e-04 | -3.61 | -0.71351 | -5.97 | CARD16                  |
| 233210_at    | 0.21921761 | 9.74e-04 | -3.61 | -0.71502 | -5.19 | FLJ12120                |
| 211431_s_at  | 0.21993402 | 9.82e-04 | -3.61 | -0.72165 | -2.75 | TYRO3                   |
| 213725_x_at  | 0.21993402 | 9.86e-04 | -3.61 | -0.72473 | -6.41 | XYLT1                   |
| 1555728_a_at | 0.22442221 | 1.01e-03 | 3.6   | -0.7453  | 5.42  | MS4A4A                  |
| 227480_at    | 0.22526391 | 1.02e-03 | -3.6  | -0.75559 | -3.56 | SUSD2                   |



|             |            |          |      |          |      |         |
|-------------|------------|----------|------|----------|------|---------|
| 204320_at   | 0.22526391 | 1.02e-03 | 3.6  | -0.75752 | 7.28 | COL11A1 |
| 1567657_at  | 0.22526391 | 1.03e-03 | 3.59 | -0.76083 | 4.81 | OR2H1   |
| 205740_s_at | 0.22526391 | 1.03e-03 | 3.59 | -0.76213 | 1.99 | RBM42   |

Table S2: Gene set annotation analysis

A

| Sublist                  | Category         | Term                                                                                                                                               | RT | Genes       | Count | %   | P-Value | Benjamini |
|--------------------------|------------------|----------------------------------------------------------------------------------------------------------------------------------------------------|----|-------------|-------|-----|---------|-----------|
| <input type="checkbox"/> | GOTERM_BP_DIRECT | <a href="#">nucleosome assembly</a>                                                                                                                | RT | <div></div> | 10    | 5,6 | 1,1E-6  | 9,8E-4    |
| <input type="checkbox"/> | GOTERM_BP_DIRECT | <a href="#">protein autophosphorylation</a>                                                                                                        | RT | <div></div> | 8     | 4,5 | 8,7E-4  | 3,1E-1    |
| <input type="checkbox"/> | GOTERM_BP_DIRECT | <a href="#">innate immune response in mucosa</a>                                                                                                   | RT | <div></div> | 4     | 2,2 | 1,4E-3  | 3,3E-1    |
| <input type="checkbox"/> | GOTERM_BP_DIRECT | <a href="#">axon ensheathment</a>                                                                                                                  | RT | <div></div> | 3     | 1,7 | 1,6E-3  | 2,9E-1    |
| <input type="checkbox"/> | GOTERM_BP_DIRECT | <a href="#">defense response to Gram-positive bacterium</a>                                                                                        | RT | <div></div> | 5     | 2,8 | 6,9E-3  | 7,0E-1    |
| <input type="checkbox"/> | GOTERM_BP_DIRECT | <a href="#">antibacterial humoral response</a>                                                                                                     | RT | <div></div> | 4     | 2,2 | 6,9E-3  | 6,3E-1    |
| <input type="checkbox"/> | GOTERM_BP_DIRECT | <a href="#">telomere organization</a>                                                                                                              | RT | <div></div> | 3     | 1,7 | 2,4E-2  | 9,5E-1    |
| <input type="checkbox"/> | GOTERM_BP_DIRECT | <a href="#">immune system process</a>                                                                                                              | RT | <div></div> | 3     | 1,7 | 2,7E-2  | 9,5E-1    |
| <input type="checkbox"/> | GOTERM_BP_DIRECT | <a href="#">positive regulation of GTPase activity</a>                                                                                             | RT | <div></div> | 11    | 6,2 | 2,9E-2  | 9,4E-1    |
| <input type="checkbox"/> | GOTERM_BP_DIRECT | <a href="#">DNA replication-dependent nucleosome assembly</a>                                                                                      | RT | <div></div> | 3     | 1,7 | 3,3E-2  | 9,4E-1    |
| <input type="checkbox"/> | GOTERM_BP_DIRECT | <a href="#">chromatin silencing at rDNA</a>                                                                                                        | RT | <div></div> | 3     | 1,7 | 4,3E-2  | 9,7E-1    |
| <input type="checkbox"/> | GOTERM_BP_DIRECT | <a href="#">adaptive immune response</a>                                                                                                           | RT | <div></div> | 5     | 2,8 | 4,3E-2  | 9,6E-1    |
| <input type="checkbox"/> | GOTERM_BP_DIRECT | <a href="#">positive regulation of endothelial cell chemotaxis by VEGF-activated vascular endothelial growth factor receptor signaling pathway</a> | RT | <div></div> | 2     | 1,1 | 4,4E-2  | 9,5E-1    |
| <input type="checkbox"/> | GOTERM_BP_DIRECT | <a href="#">peptidyl-tyrosine phosphorylation</a>                                                                                                  | RT | <div></div> | 5     | 2,8 | 4,8E-2  | 9,5E-1    |
| <input type="checkbox"/> | GOTERM_BP_DIRECT | <a href="#">angiogenesis</a>                                                                                                                       | RT | <div></div> | 6     | 3,4 | 4,9E-2  | 9,4E-1    |
| <input type="checkbox"/> | GOTERM_BP_DIRECT | <a href="#">protein phosphorylation</a>                                                                                                            | RT | <div></div> | 9     | 5,1 | 5,1E-2  | 9,4E-1    |
| <input type="checkbox"/> | GOTERM_BP_DIRECT | <a href="#">platelet aggregation</a>                                                                                                               | RT | <div></div> | 3     | 1,7 | 5,1E-2  | 9,3E-1    |
| <input type="checkbox"/> | GOTERM_BP_DIRECT | <a href="#">regulation of T cell receptor signaling pathway</a>                                                                                    | RT | <div></div> | 2     | 1,1 | 5,2E-2  | 9,2E-1    |
| <input type="checkbox"/> | GOTERM_BP_DIRECT | <a href="#">protein heterotetramerization</a>                                                                                                      | RT | <div></div> | 3     | 1,7 | 5,3E-2  | 9,2E-1    |
| <input type="checkbox"/> | GOTERM_BP_DIRECT | <a href="#">beta-catenin-TCF complex assembly</a>                                                                                                  | RT | <div></div> | 3     | 1,7 | 5,6E-2  | 9,2E-1    |
| <input type="checkbox"/> | GOTERM_BP_DIRECT | <a href="#">chromatin silencing</a>                                                                                                                | RT | <div></div> | 3     | 1,7 | 6,0E-2  | 9,2E-1    |
| <input type="checkbox"/> | GOTERM_BP_DIRECT | <a href="#">negative regulation of gene expression, epigenetic</a>                                                                                 | RT | <div></div> | 3     | 1,7 | 7,3E-2  | 9,5E-1    |
| <input type="checkbox"/> | GOTERM_BP_DIRECT | <a href="#">positive regulation of type I interferon production</a>                                                                                | RT | <div></div> | 3     | 1,7 | 7,5E-2  | 9,5E-1    |
| <input type="checkbox"/> | GOTERM_BP_DIRECT | <a href="#">gene silencing by RNA</a>                                                                                                              | RT | <div></div> | 4     | 2,2 | 7,6E-2  | 9,4E-1    |

B

| Sublist                  | Category         | Term                                                                          | RT | Genes       | Count | %   | P-Value |
|--------------------------|------------------|-------------------------------------------------------------------------------|----|-------------|-------|-----|---------|
| <input type="checkbox"/> | GOTERM_BP_DIRECT | <a href="#">positive regulation of fibroblast migration</a>                   | RT | <div></div> | 4     | 1,1 | 7,2E-4  |
| <input type="checkbox"/> | GOTERM_BP_DIRECT | <a href="#">negative regulation of nucleic acid-templated transcription</a>   | RT | <div></div> | 6     | 1,6 | 1,2E-3  |
| <input type="checkbox"/> | GOTERM_BP_DIRECT | <a href="#">cellular response to histamine</a>                                | RT | <div></div> | 3     | 0,8 | 7,5E-3  |
| <input type="checkbox"/> | GOTERM_BP_DIRECT | <a href="#">sensory perception of sound</a>                                   | RT | <div></div> | 8     | 2,2 | 7,6E-3  |
| <input type="checkbox"/> | GOTERM_BP_DIRECT | <a href="#">extracellular matrix disassembly</a>                              | RT | <div></div> | 6     | 1,6 | 9,4E-3  |
| <input type="checkbox"/> | GOTERM_BP_DIRECT | <a href="#">forelimb morphogenesis</a>                                        | RT | <div></div> | 3     | 0,8 | 1,2E-2  |
| <input type="checkbox"/> | GOTERM_BP_DIRECT | <a href="#">cell adhesion</a>                                                 | RT | <div></div> | 16    | 4,3 | 1,2E-2  |
| <input type="checkbox"/> | GOTERM_BP_DIRECT | <a href="#">cell differentiation</a>                                          | RT | <div></div> | 16    | 4,3 | 1,3E-2  |
| <input type="checkbox"/> | GOTERM_BP_DIRECT | <a href="#">regulation of cardiac conduction</a>                              | RT | <div></div> | 5     | 1,4 | 1,5E-2  |
| <input type="checkbox"/> | GOTERM_BP_DIRECT | <a href="#">calcium ion transmembrane transport</a>                           | RT | <div></div> | 7     | 1,9 | 1,6E-2  |
| <input type="checkbox"/> | GOTERM_BP_DIRECT | <a href="#">neurotransmitter biosynthetic process</a>                         | RT | <div></div> | 3     | 0,8 | 1,7E-2  |
| <input type="checkbox"/> | GOTERM_BP_DIRECT | <a href="#">protein localization to organelle</a>                             | RT | <div></div> | 3     | 0,8 | 2,9E-2  |
| <input type="checkbox"/> | GOTERM_BP_DIRECT | <a href="#">innervation</a>                                                   | RT | <div></div> | 3     | 0,8 | 3,7E-2  |
| <input type="checkbox"/> | GOTERM_BP_DIRECT | <a href="#">response to corticosterone</a>                                    | RT | <div></div> | 3     | 0,8 | 3,7E-2  |
| <input type="checkbox"/> | GOTERM_BP_DIRECT | <a href="#">transmission of nerve impulse</a>                                 | RT | <div></div> | 3     | 0,8 | 4,5E-2  |
| <input type="checkbox"/> | GOTERM_BP_DIRECT | <a href="#">response to immobilization stress</a>                             | RT | <div></div> | 3     | 0,8 | 4,9E-2  |
| <input type="checkbox"/> | GOTERM_BP_DIRECT | <a href="#">positive regulation of MAPK cascade</a>                           | RT | <div></div> | 5     | 1,4 | 4,9E-2  |
| <input type="checkbox"/> | GOTERM_BP_DIRECT | <a href="#">negative regulation of phosphatase activity</a>                   | RT | <div></div> | 4     | 1,1 | 5,6E-2  |
| <input type="checkbox"/> | GOTERM_BP_DIRECT | <a href="#">regulation of synaptic transmission, glutamatergic</a>            | RT | <div></div> | 3     | 0,8 | 5,7E-2  |
| <input type="checkbox"/> | GOTERM_BP_DIRECT | <a href="#">cochlea development</a>                                           | RT | <div></div> | 3     | 0,8 | 6,2E-2  |
| <input type="checkbox"/> | GOTERM_BP_DIRECT | <a href="#">smooth muscle cell proliferation</a>                              | RT | <div></div> | 2     | 0,5 | 6,6E-2  |
| <input type="checkbox"/> | GOTERM_BP_DIRECT | <a href="#">sprouting angiogenesis</a>                                        | RT | <div></div> | 3     | 0,8 | 6,7E-2  |
| <input type="checkbox"/> | GOTERM_BP_DIRECT | <a href="#">protein autophosphorylation</a>                                   | RT | <div></div> | 7     | 1,9 | 7,3E-2  |
| <input type="checkbox"/> | GOTERM_BP_DIRECT | <a href="#">endodermal cell differentiation</a>                               | RT | <div></div> | 3     | 0,8 | 7,6E-2  |
| <input type="checkbox"/> | GOTERM_BP_DIRECT | <a href="#">positive regulation of the force of heart contraction</a>         | RT | <div></div> | 2     | 0,5 | 8,2E-2  |
| <input type="checkbox"/> | GOTERM_BP_DIRECT | <a href="#">negative regulation of gene expression</a>                        | RT | <div></div> | 6     | 1,6 | 8,4E-2  |
| <input type="checkbox"/> | GOTERM_BP_DIRECT | <a href="#">protein phosphorylation</a>                                       | RT | <div></div> | 13    | 3,5 | 8,9E-2  |
| <input type="checkbox"/> | GOTERM_BP_DIRECT | <a href="#">collagen-activated tyrosine kinase receptor signaling pathway</a> | RT | <div></div> | 2     | 0,5 | 9,8E-2  |
| <input type="checkbox"/> | GOTERM_BP_DIRECT | <a href="#">axonal transport of mitochondrion</a>                             | RT | <div></div> | 2     | 0,5 | 9,8E-2  |



**Table S3: Gene expression profiling data of OCI-M2 treated for NK**

| Probe_set_ID | Symbol_na33    | OCIM2siCTR   | OCIM2siNKX24 | CTR-NKX24   |  |
|--------------|----------------|--------------|--------------|-------------|--|
| 205419_at    | GPR183         | 0,03125738   | -2,690860744 | 2,722118124 |  |
| 242136_x_at  | MGC70870       | -0,259832361 | -2,735862426 | 2,476030064 |  |
| 216710_x_at  | ZNF287         | 1,64218396   | -0,765504029 | 2,407687989 |  |
| 220039_s_at  | CDKAL1         | 0,20027154   | -1,961547147 | 2,161818687 |  |
| 1569013_s_at | LOC96610       | 0,457392764  | -1,615132408 | 2,072525172 |  |
| 241675_s_at  | -              | -0,888496123 | -2,847001814 | 1,958505692 |  |
| 216395_at    | FBXL18         | -0,59053611  | -2,503677622 | 1,913141512 |  |
| 206873_at    | CA6            | -0,299034815 | -2,211750327 | 1,912715512 |  |
| 228756_at    | SLC6A6         | 0,103263601  | -1,787089803 | 1,890353405 |  |
| 239039_at    | -              | -0,285837228 | -2,162639771 | 1,876802543 |  |
| 236837_x_at  | MIPEPP3        | 0,083054335  | -1,787089803 | 1,870144138 |  |
| 222224_at    | NACA2          | -1,240169874 | -3,037500868 | 1,797330994 |  |
| 1563272_at   | TBC1D8B        | -0,83191556  | -2,621331989 | 1,789416429 |  |
| 212354_at    | SULF1          | -0,299034815 | -2,086984744 | 1,787949929 |  |
| 1553805_at   | C3orf49        | -0,79540287  | -2,575129729 | 1,779726859 |  |
| 234434_at    | -              | -0,85085127  | -2,621331989 | 1,770480719 |  |
| 235106_at    | <b>MAML2</b>   | -0,655928373 | -2,408705138 | 1,752776764 |  |
| 1554549_a_at | WDR20          | -0,325749314 | -2,037551727 | 1,711802412 |  |
| 1567681_at   | SNORA74A       | -0,759588698 | -2,456406426 | 1,696817728 |  |
| 206255_at    | BLK            | -0,467091869 | -2,162639771 | 1,695547903 |  |
| 217353_at    | -              | 0,425644434  | -1,264005341 | 1,689649774 |  |
| 235165_at    | PARD6B         | 1,261018186  | -0,41858459  | 1,679602776 |  |
| 242511_at    | -              | -0,112808516 | -1,787089803 | 1,674281287 |  |
| 1558017_s_at | -              | -0,741668563 | -2,408705138 | 1,667036575 |  |
| 1564017_at   | COL18A1-AS1    | -0,496991414 | -2,162639771 | 1,665648358 |  |
| 210956_at    | PPYR1          | -0,67289328  | -2,335104118 | 1,662210838 |  |
| 220103_s_at  | LOC100509751 / | 0,152582607  | -1,494668682 | 1,647251289 |  |
| 239354_at    | -              | -0,706943342 | -2,335104118 | 1,628160776 |  |
| 214690_at    | TAF1B          | 0,798390451  | -0,819238336 | 1,617628787 |  |
| 231885_at    | ZNF451         | -0,172274514 | -1,787089803 | 1,614815289 |  |
| 234713_x_at  | -              | -1,131062212 | -2,735862426 | 1,604800213 |  |
| 1562947_x_at | -              | -1,353583928 | -2,954576755 | 1,600992827 |  |
| 244360_at    | FBXL17         | -0,022466681 | -1,615132408 | 1,592665727 |  |
| 232193_at    | GSTT1          | -0,622910612 | -2,211750327 | 1,588839715 |  |
| 1557007_a_at | -              | -1,196375121 | -2,780313924 | 1,583938803 |  |
| 230706_s_at  | CAMK2N2        | 0,181384709  | -1,377419394 | 1,558804103 |  |
| 210795_s_at  | -              | 0,401366113  | -1,154897679 | 1,556263792 |  |
| 209937_at    | TM4SF4         | -0,741668563 | -2,286583451 | 1,544914888 |  |
| 240757_at    | CLASP1         | -0,622910612 | -2,162639771 | 1,539729159 |  |
| 234431_at    | GSN            | -0,423248115 | -1,961547147 | 1,538299032 |  |
| 229295_at    | IL17RA         | -0,325749314 | -1,862647763 | 1,536898448 |  |
| 218952_at    | PCSK1N         | 0,518867317  | -1,010192375 | 1,529059692 |  |
| 233781_s_at  | RIF1           | -0,512251684 | -2,037551727 | 1,525300042 |  |
| 228721_at    | KRBOX1         | -0,43775896  | -1,961547147 | 1,523788187 |  |
| 217019_at    | -              | 0,95671774   | -0,566887459 | 1,5236052   |  |
| 225124_at    | PPP1R9B        | 0,606430281  | -0,912331589 | 1,51876187  |  |
| 1569952_x_at | -              | 0,496120222  | -1,010192375 | 1,506312597 |  |
| 220519_s_at  | LIM2           | -0,83191556  | -2,335104118 | 1,503188558 |  |
| 241637_at    | -              | -0,83191556  | -2,335104118 | 1,503188558 |  |
| 216467_s_at  | -              | -0,285837228 | -1,787089803 | 1,501252575 |  |
| 207798_s_at  | ATXN2L         | -0,366776884 | -1,862647763 | 1,495870879 |  |
| 225532_at    | CABLES1        | -0,172274514 | -1,663414495 | 1,491139981 |  |
| 207987_s_at  | GNRH1          | -1,089016378 | -2,575129729 | 1,486113351 |  |

|              |                 |              |              |             |  |
|--------------|-----------------|--------------|--------------|-------------|--|
| 1560659_at   | -               | -0,926850548 | -2,408705138 | 1,481854589 |  |
| 213658_at    | -               | -0,741668563 | -2,211750327 | 1,470081765 |  |
| 227073_at    | MAP3K2          | 0,822971223  | -0,646746079 | 1,469717302 |  |
| 223400_s_at  | PBRM1           | 1,143956113  | -0,322870281 | 1,466826394 |  |
| 203939_at    | NT5E            | 0,695652136  | -0,765504029 | 1,461156165 |  |
| 220252_x_at  | CXorf21         | -0,831915556 | -2,286583451 | 1,454667891 |  |
| 1561135_at   | -               | -0,285837228 | -1,738067356 | 1,452230128 |  |
| 237823_at    | -               | -0,512251684 | -1,961547147 | 1,449295463 |  |
| 240227_at    | MIER1           | -0,59053611  | -2,037551727 | 1,447015616 |  |
| 1564460_at   | LOC286442       | -0,423248115 | -1,862647763 | 1,439399647 |  |
| 222051_s_at  | -               | -0,423248115 | -1,862647763 | 1,439399647 |  |
| 1569648_at   | DACT2           | 0,425644434  | -1,010192375 | 1,435836809 |  |
| 228782_at    | SCGB3A2         | -0,85085127  | -2,286583451 | 1,435732181 |  |
| 205355_at    | ACADSB          | 0,103263601  | -1,332017329 | 1,435280931 |  |
| 205887_x_at  | MSH3            | 1,406361373  | -0,024572586 | 1,43093396  |  |
| 1559297_at   | SNX29P2         | -1,196375121 | -2,621331989 | 1,424956868 |  |
| 243550_at    | ZDHHC21         | -1,196375121 | -2,621331989 | 1,424956868 |  |
| 228926_s_at  | SMARCA2         | -0,543051993 | -1,961547147 | 1,418495154 |  |
| 237408_at    | DCUN1D1         | -0,196756757 | -1,615132408 | 1,418375651 |  |
| 205124_at    | MEF2B /// MEF2E | -0,496991414 | -1,912089812 | 1,415098398 |  |
| 1555183_at   | TERF2           | -0,136301282 | -1,541908042 | 1,40560676  |  |
| 1559538_at   | -               | -0,259832361 | -1,663414495 | 1,403582133 |  |
| 203130_s_at  | KIF5C           | 0,181384709  | -1,220210588 | 1,401595297 |  |
| 1562845_at   | EP400NL         | -0,512251684 | -1,912089812 | 1,399838127 |  |
| 1560648_s_at | TSPYL1          | -0,888496123 | -2,286583451 | 1,398087328 |  |
| 216497_at    | -               | 0,133056859  | -1,264005341 | 1,397062199 |  |
| 206943_at    | <b>TGFBF1</b>   | -0,148196756 | -1,541908042 | 1,393711285 |  |
| 221992_at    | NPIPL2          | -0,394749123 | -1,787089803 | 1,39234068  |  |
| 241345_at    | MIR186 /// ZRAN | -1,308181863 | -2,690860744 | 1,382678881 |  |
| 244025_at    | -               | -0,706943342 | -2,086984744 | 1,380041402 |  |
| 225996_at    | LONRF2          | -1,196375121 | -2,575129729 | 1,378754608 |  |
| 225589_at    | SH3RF1          | -0,285837228 | -1,663414495 | 1,377577266 |  |
| 229689_s_at  | DLG5            | -1,089016378 | -2,456406426 | 1,367390048 |  |
| 242474_s_at  | VMA21           | -1,089016378 | -2,456406426 | 1,367390048 |  |
| 209888_s_at  | MYL1            | -0,79540287  | -2,162639771 | 1,367236901 |  |
| 214337_at    | COPA            | -0,496991414 | -1,862647763 | 1,365656349 |  |
| 227905_s_at  | AZI2            | 0,03125738   | -1,332017329 | 1,363274709 |  |
| 1560138_at   | KIAA0226        | -1,047650486 | -2,408705138 | 1,361054652 |  |
| 226342_at    | SPTBN1          | -0,85085127  | -2,211750327 | 1,360899057 |  |
| 244186_at    | -               | -0,926850548 | -2,286583451 | 1,359732902 |  |
| 204083_s_at  | TPM2            | 0,503742507  | -0,855751026 | 1,359493533 |  |
| 213498_at    | CREB3L1         | 0,401366113  | -0,950686014 | 1,352052127 |  |
| 220149_at    | C2orf54         | -0,512251684 | -1,862647763 | 1,350396078 |  |
| 226420_at    | MECOM           | -0,512251684 | -1,862647763 | 1,350396078 |  |
| 1559681_a_at | TRIM16L         | 0,702292136  | -0,646746079 | 1,349038215 |  |
| 242472_x_at  | FNBP4           | 0,291166226  | -1,050406615 | 1,341572841 |  |
| 1562247_at   | LOC286058       | -0,946847173 | -2,286583451 | 1,339736277 |  |
| 215283_at    | LOC339290       | -0,946847173 | -2,286583451 | 1,339736277 |  |
| 228940_at    | NDUFB4          | -0,622910612 | -1,961547147 | 1,338636535 |  |
| 1552814_a_at | KLF14           | -1,2845686   | -2,621331989 | 1,336763389 |  |
| 1561099_at   | FLJ32756        | -1,2845686   | -2,621331989 | 1,336763389 |  |
| 210675_s_at  | PTPRR           | -1,240169874 | -2,575129729 | 1,334959855 |  |
| 215425_at    | BTG3            | -1,518072576 | -2,847001814 | 1,328929239 |  |
| 224875_at    | C5orf24         | 0,760715727  | -0,566887459 | 1,327603186 |  |
| 238830_at    | -               | -1,131062212 | -2,456406426 | 1,325344214 |  |
| 204873_at    | PEX1            | 2,171078719  | 0,847075464  | 1,324003255 |  |



|              |            |              |              |             |  |
|--------------|------------|--------------|--------------|-------------|--|
| 215868_x_at  | -          | -0,888496123 | -2,211750327 | 1,323254205 |  |
| 1555821_a_at | AKT1S1     | 0,209623097  | -1,112851844 | 1,322474941 |  |
| 218923_at    | CTBS       | -0,055687482 | -1,377419394 | 1,321731912 |  |
| 1568894_at   | -          | -0,59053611  | -1,912089812 | 1,321553702 |  |
| 205141_at    | ANG        | -0,59053611  | -1,912089812 | 1,321553702 |  |
| 204667_at    | FOXA1      | -0,221656139 | -1,541908042 | 1,320251903 |  |
| 1557421_at   | -          | 0,900083947  | -0,41858459  | 1,318668537 |  |
| 1564373_a_at | LOC283887  | 1,269985355  | -0,046302147 | 1,316287501 |  |
| 1562091_at   | -          | -1,639579028 | -2,954576755 | 1,314997727 |  |
| 205579_at    | HRH1       | -1,308181863 | -2,621331989 | 1,313150126 |  |
| 240589_at    | LINC00313  | -1,308181863 | -2,621331989 | 1,313150126 |  |
| 230095_at    | -          | -0,022466681 | -1,332017329 | 1,309550649 |  |
| 1557066_at   | LUC7L      | -1,470833215 | -2,780313924 | 1,309480709 |  |
| 215595_x_at  | -          | 0,152582607  | -1,154897679 | 1,307480286 |  |
| 215444_s_at  | TRIM31     | -0,986356909 | -2,286583451 | 1,300226542 |  |
| 215558_at    | UBR2       | -0,986356909 | -2,286583451 | 1,300226542 |  |
| 207887_s_at  | CALCR      | -0,078265071 | -1,377419394 | 1,299154323 |  |
| 239768_x_at  | GPATCH2    | 0,613492853  | -0,679763839 | 1,293256693 |  |
| 241822_at    | SIX5       | -0,79540287  | -2,086984744 | 1,291581874 |  |
| 222308_x_at  | -          | -1,399512875 | -2,690860744 | 1,291347869 |  |
| 231970_at    | C14orf118  | 3,056846434  | 1,765933685  | 1,290912749 |  |
| 214294_at    | KIAA0485   | -0,622910612 | -1,912089812 | 1,2891792   |  |
| 228718_at    | ZNF44      | -0,622910612 | -1,912089812 | 1,2891792   |  |
| 205364_at    | ACOX2      | -0,67289328  | -1,961547147 | 1,288653868 |  |
| 1560500_at   | -          | -0,57445847  | -1,862647763 | 1,288189292 |  |
| 244290_at    | -          | -0,57445847  | -1,862647763 | 1,288189292 |  |
| 1559103_s_at | -          | -0,926850548 | -2,211750327 | 1,284899779 |  |
| 1552980_at   | HAS3       | 0,171847695  | -1,112851844 | 1,284699539 |  |
| 1554194_at   | -          | -1,173767127 | -2,456406426 | 1,282639299 |  |
| 207931_s_at  | PFKFB2     | 0,715481152  | -0,566887459 | 1,282368611 |  |
| 1556932_at   | -          | -1,71423189  | -2,996335703 | 1,282103813 |  |
| 234232_at    | -          | -0,759588698 | -2,037551727 | 1,277963029 |  |
| 1554110_at   | CDCP1      | -1,131062212 | -2,408705138 | 1,277642925 |  |
| 240101_at    | -          | -1,131062212 | -2,408705138 | 1,277642925 |  |
| 205648_at    | WNT2       | -0,055687482 | -1,332017329 | 1,276329847 |  |
| 229184_at    | CCNT2      | -0,888496123 | -2,162639771 | 1,274143649 |  |
| 229480_at    | MAGI2-AS3  | -0,394749123 | -1,663414495 | 1,268665371 |  |
| 1562948_at   | -          | -1,353583928 | -2,621331989 | 1,267748061 |  |
| 207934_at    | RFPL1      | -1,353583928 | -2,621331989 | 1,267748061 |  |
| 1561052_s_at | -          | -1,308181863 | -2,575129729 | 1,266947866 |  |
| 1553994_at   | NT5E       | -1,470833215 | -2,735862426 | 1,26502921  |  |
| 1568735_at   | -          | -1,470833215 | -2,735862426 | 1,26502921  |  |
| 229956_at    | NR2C1      | -1,470833215 | -2,735862426 | 1,26502921  |  |
| 1559340_at   | TTLL11-IT1 | -0,946847173 | -2,211750327 | 1,264903154 |  |
| 238982_at    | DENR       | -0,946847173 | -2,211750327 | 1,264903154 |  |
| 206616_s_at  | ADAM22     | -1,240169874 | -2,503677622 | 1,263507748 |  |
| 202663_at    | WIPF1      | -0,352951799 | -1,615132408 | 1,262180609 |  |
| 239608_at    | LPCAT4     | -0,352951799 | -1,615132408 | 1,262180609 |  |
| 1552396_at   | WFDC6      | -1,196375121 | -2,456406426 | 1,260031305 |  |
| 1556533_at   | C17orf52   | 0,30867765   | -0,950686014 | 1,259363664 |  |
| 232071_at    | MRPL19     | 0,103263601  | -1,154897679 | 1,25816128  |  |
| 1561223_at   | -          | -0,83191556  | -2,086984744 | 1,255069184 |  |
| 239352_at    | SLC6A15    | -0,83191556  | -2,086984744 | 1,255069184 |  |
| 208414_s_at  | HOXB3      | -0,706943342 | -1,961547147 | 1,254603806 |  |
| 219846_at    | GON4L      | -0,706943342 | -1,961547147 | 1,254603806 |  |
| 232764_at    | CCNB2      | -0,706943342 | -1,961547147 | 1,254603806 |  |

|              |                 |              |              |             |  |
|--------------|-----------------|--------------|--------------|-------------|--|
| 212012_at    | PXDN            | -0,078265071 | -1,332017329 | 1,253752258 |  |
| 1555741_at   | MRAP            | -0,366776884 | -1,615132408 | 1,248355524 |  |
| 231121_at    | HPS3            | -0,299034815 | -1,541908042 | 1,242873227 |  |
| 234560_at    | -               | -0,79540287  | -2,037551727 | 1,242148857 |  |
| 242302_at    | PDS5B           | -0,79540287  | -2,037551727 | 1,242148857 |  |
| 234332_at    | NUB1            | -0,496991414 | -1,738067356 | 1,241075942 |  |
| 1562058_at   | -               | -1,71423189  | -2,954576755 | 1,240344865 |  |
| 1562937_at   | -               | -0,622910612 | -1,862647763 | 1,23973715  |  |
| 234586_at    | SARDH           | -0,67289328  | -1,912089812 | 1,239196532 |  |
| 231330_at    | LINC00445       | -1,047650486 | -2,286583451 | 1,238932965 |  |
| 237706_at    | STXBP4          | -1,047650486 | -2,286583451 | 1,238932965 |  |
| 204935_at    | PTPN2           | 0,702292136  | -0,536087151 | 1,238379287 |  |
| 224138_at    | CBX2            | 0,083054335  | -1,154897679 | 1,237952014 |  |
| 1559062_at   | -               | -1,173767127 | -2,408705138 | 1,234938011 |  |
| 240781_x_at  | DCUN1D1         | -1,173767127 | -2,408705138 | 1,234938011 |  |
| 239737_at    | -               | -0,259832361 | -1,494668682 | 1,23483632  |  |
| 241128_at    | -               | -1,763254337 | -2,996335703 | 1,233081366 |  |
| 1557022_at   | -               | -0,148196756 | -1,377419394 | 1,229222638 |  |
| 229274_at    | GNAS            | -0,43775896  | -1,663414495 | 1,225655534 |  |
| 1559876_at   | -               | 0,171847695  | -1,050406615 | 1,222254311 |  |
| 1553378_a_at | C17orf66        | -1,399512875 | -2,621331989 | 1,221819114 |  |
| 228811_at    | -               | -1,353583928 | -2,575129729 | 1,221545801 |  |
| 221326_s_at  | TUBD1           | 1,000476627  | -0,220592223 | 1,221068851 |  |
| 202400_s_at  | SRF             | 0,30867765   | -0,912331589 | 1,221009239 |  |
| 236133_x_at  | ZNF254          | 0,30867765   | -0,912331589 | 1,221009239 |  |
| 37953_s_at   | ASIC1           | -0,478090764 | -1,698550632 | 1,220459868 |  |
| 1554469_at   | ZBTB44          | -0,394749123 | -1,615132408 | 1,220383284 |  |
| 1556467_at   | LOC100653340    | -1,470833215 | -2,690860744 | 1,220027528 |  |
| 233232_at    | RHBDL3          | -1,470833215 | -2,690860744 | 1,220027528 |  |
| 1553781_at   | ZC3HAV1L        | -0,741668563 | -1,961547147 | 1,219878585 |  |
| 234920_at    | ZNF7            | -0,00073712  | -1,220210588 | 1,219473467 |  |
| 1552427_at   | ZNF485          | -1,2845686   | -2,503677622 | 1,219109022 |  |
| 240939_x_at  | -               | -1,240169874 | -2,456406426 | 1,216236552 |  |
| 220020_at    | XPNPEP3         | -0,325749314 | -1,541908042 | 1,216158728 |  |
| 235784_at    | -               | -0,946847173 | -2,162639771 | 1,215792598 |  |
| 1560590_s_at | -               | -0,57445847  | -1,787089803 | 1,212631333 |  |
| 209928_s_at  | MSC             | -1,196375121 | -2,408705138 | 1,212330016 |  |
| 1553108_at   | C5orf24         | 0,480753764  | -0,730778808 | 1,211532572 |  |
| 1559746_a_at | ZNF718          | -0,285837228 | -1,494668682 | 1,208831453 |  |
| 218800_at    | SRD5A3          | -0,285837228 | -1,494668682 | 1,208831453 |  |
| 236849_at    | VTI1A           | -0,285837228 | -1,494668682 | 1,208831453 |  |
| 1570181_a_at | -               | -1,639579028 | -2,847001814 | 1,207422786 |  |
| 1560094_at   | -               | -0,655928373 | -1,862647763 | 1,206719389 |  |
| 214127_s_at  | SRRT            | -0,655928373 | -1,862647763 | 1,206719389 |  |
| 222723_at    | VWA1            | 0,255492549  | -0,950686014 | 1,206178564 |  |
| 1553518_at   | DEFT1P /// DEFT | -0,83191556  | -2,037551727 | 1,205636167 |  |
| 1556175_at   | MTSS1L          | -0,83191556  | -2,037551727 | 1,205636167 |  |
| 1553217_s_at | ZNF41           | -1,131062212 | -2,335104118 | 1,204041905 |  |
| 208276_at    | -               | -1,131062212 | -2,335104118 | 1,204041905 |  |
| 217602_at    | LOC100288602 /  | -0,759588698 | -1,961547147 | 1,201958449 |  |
| 243670_at    | -               | -0,221656139 | -1,423348341 | 1,201692203 |  |
| 224166_at    | SLC25A2         | -0,888496123 | -2,086984744 | 1,198488621 |  |
| 228416_at    | ACVR2A          | -0,888496123 | -2,086984744 | 1,198488621 |  |
| 209544_at    | RIPK2           | 0,661985843  | -0,536087151 | 1,198072993 |  |
| 213273_at    | ODZ4            | -1,089016378 | -2,286583451 | 1,197567073 |  |
| 1560661_x_at | -               | -0,467091869 | -1,663414495 | 1,196322626 |  |



|              |                 |              |              |             |  |
|--------------|-----------------|--------------|--------------|-------------|--|
| 226908_at    | LRIG3           | -0,467091869 | -1,663414495 | 1,196322626 |  |
| 207648_at    | DRP2            | 0,083054335  | -1,112851844 | 1,195906179 |  |
| 238559_at    | -               | -0,136301282 | -1,332017329 | 1,195716047 |  |
| 226674_at    | SHISA4          | -0,299034815 | -1,494668682 | 1,195633867 |  |
| 1554400_at   | TCTE3           | -1,308181863 | -2,503677622 | 1,195495759 |  |
| 211099_s_at  | CNGB1           | -1,308181863 | -2,503677622 | 1,195495759 |  |
| 238614_x_at  | ZNF430          | 1,504602299  | 0,310717132  | 1,193885167 |  |
| 1562319_at   | FAM169B         | -0,423248115 | -1,615132408 | 1,191884292 |  |
| 220056_at    | IL22RA1         | -0,423248115 | -1,615132408 | 1,191884292 |  |
| 230120_s_at  | PLGLB1 /// PLGL | -0,423248115 | -1,615132408 | 1,191884292 |  |
| 205301_s_at  | OGG1            | 0,181384709  | -1,010192375 | 1,191577084 |  |
| 237720_at    | ASB4            | -1,763254337 | -2,954576755 | 1,191322418 |  |
| 232394_at    | -               | -0,67289328  | -1,862647763 | 1,189754483 |  |
| 210701_at    | CFDP1           | -0,85085127  | -2,037551727 | 1,186700457 |  |
| 216750_at    | APBB2           | -0,85085127  | -2,037551727 | 1,186700457 |  |
| 218959_at    | HOXC10          | -1,026571149 | -2,211750327 | 1,185179179 |  |
| 216422_at    | -               | -0,148196756 | -1,332017329 | 1,183820573 |  |
| 220951_s_at  | A1CF            | -0,148196756 | -1,332017329 | 1,183820573 |  |
| 216681_at    | -               | -1,71423189  | -2,89013181  | 1,175899921 |  |
| 207661_s_at  | SH3PXD2A        | -1,399512875 | -2,575129729 | 1,175616854 |  |
| 235011_at    | MAP3K2          | -1,399512875 | -2,575129729 | 1,175616854 |  |
| 215922_at    | REPS1           | -1,2845686   | -2,456406426 | 1,171837826 |  |
| 241043_at    | -               | -1,2845686   | -2,456406426 | 1,171837826 |  |
| 1553644_at   | SYNE3           | -1,240169874 | -2,408705138 | 1,168535263 |  |
| 226051_at    | SELM            | -1,240169874 | -2,408705138 | 1,168535263 |  |
| 230338_x_at  | GSX2            | 0,401366113  | -0,765504029 | 1,166870142 |  |
| 241434_at    | -               | -0,496991414 | -1,663414495 | 1,166423081 |  |
| 1555972_s_at | FBXO28          | -0,055687482 | -1,220210588 | 1,164523106 |  |
| 219875_s_at  | DESI2           | -0,055687482 | -1,220210588 | 1,164523106 |  |
| 1554398_at   | LYG2            | -0,622910612 | -1,787089803 | 1,164179191 |  |
| 234344_at    | LOC100288675    | 1,732533761  | 0,568365095  | 1,164168666 |  |
| 1564887_at   | -               | -0,57445847  | -1,738067356 | 1,163608886 |  |
| 235129_at    | PPP1R1A         | -1,173767127 | -2,335104118 | 1,161336991 |  |
| 1554283_at   | CCRN4L          | 1,269985355  | 0,109221392  | 1,160763962 |  |
| 206131_at    | CLPS            | -0,172274514 | -1,332017329 | 1,159742815 |  |
| 217181_at    | -               | -1,688127507 | -2,847001814 | 1,158874308 |  |
| 1554544_a_at | MBP             | 0,246434561  | -0,912331589 | 1,15876615  |  |
| 217344_at    | -               | -0,221656139 | -1,377419394 | 1,155763256 |  |
| 224816_at    | GET4            | -0,221656139 | -1,377419394 | 1,155763256 |  |
| 1558109_x_at | LOC283788       | -1,131062212 | -2,286583451 | 1,155521238 |  |
| 1563539_at   | -               | -1,131062212 | -2,286583451 | 1,155521238 |  |
| 205759_s_at  | SULT2B1         | -0,00073712  | -1,154897679 | 1,154160559 |  |
| 234751_s_at  | NLGN3           | 0,334552598  | -0,819238336 | 1,153790934 |  |
| 217112_at    | PDGFB           | -0,759588698 | -1,912089812 | 1,152501114 |  |
| 221828_s_at  | FAM125B         | -0,512251684 | -1,663414495 | 1,15116281  |  |
| 210078_s_at  | KCNAB1          | -1,424023738 | -2,575129729 | 1,151105991 |  |
| 239527_at    | RAB3GAP1        | -1,353583928 | -2,503677622 | 1,150093694 |  |
| 236279_at    | -               | -0,888496123 | -2,037551727 | 1,149055604 |  |
| 1559988_at   | ZNF483          | -1,308181863 | -2,456406426 | 1,148224563 |  |
| 1564632_at   | -               | -1,308181863 | -2,456406426 | 1,148224563 |  |
| 217247_at    | -               | -1,308181863 | -2,456406426 | 1,148224563 |  |
| 238014_at    | TMEM194B        | -1,308181863 | -2,456406426 | 1,148224563 |  |
| 206105_at    | AFF2            | -0,59053611  | -1,738067356 | 1,147531246 |  |
| 210934_at    | BLK             | -0,59053611  | -1,738067356 | 1,147531246 |  |
| 1557609_s_at | TBC1D12         | -0,394749123 | -1,541908042 | 1,147158919 |  |
| 206119_at    | BHMT            | -0,394749123 | -1,541908042 | 1,147158919 |  |

|              |                  |              |              |             |  |
|--------------|------------------|--------------|--------------|-------------|--|
| 1561429_a_at | C3orf15 /// LOC1 | -1,591296941 | -2,735862426 | 1,144565484 |  |
| 1554641_a_at | TET3             | -0,234278768 | -1,377419394 | 1,143140627 |  |
| 233522_at    | -                | -0,352951799 | -1,494668682 | 1,141716883 |  |
| 244135_at    | -                | -0,946847173 | -2,086984744 | 1,140137571 |  |
| 1564837_at   | LOC151760        | -1,196375121 | -2,335104118 | 1,138728996 |  |
| 206585_at    | MKRN3            | -1,196375121 | -2,335104118 | 1,138728996 |  |
| 206610_s_at  | F11              | -0,285837228 | -1,423348341 | 1,137511113 |  |
| 228141_at    | GPX8             | 0,317354302  | -0,819238336 | 1,136592638 |  |
| 204860_s_at  | LOC100509323 /   | -0,196756757 | -1,332017329 | 1,135260572 |  |
| 242433_at    | ZBTB11           | -0,196756757 | -1,332017329 | 1,135260572 |  |
| 1558041_a_at | KIAA0895L        | 1,512180019  | 0,377530647  | 1,134649372 |  |
| 216897_s_at  | FAM76A           | 0,020670649  | -1,112851844 | 1,133522493 |  |
| 219800_s_at  | THNSL1           | 0,083054335  | -1,050406615 | 1,13346095  |  |
| 225279_s_at  | C3orf17          | 0,123193849  | -1,010192375 | 1,133386224 |  |
| 229215_at    | ASCL2            | -0,655928373 | -1,787089803 | 1,13116143  |  |
| 236935_at    | PTPN4            | -0,83191556  | -1,961547147 | 1,129631587 |  |
| 205744_at    | DOC2A            | 0,273439642  | -0,855751026 | 1,129190668 |  |
| 217897_at    | FXVD6            | -0,366776884 | -1,494668682 | 1,127891798 |  |
| 238776_x_at  | OBSL1            | -0,136301282 | -1,264005341 | 1,127704058 |  |
| 241333_x_at  | -                | 0,735041319  | -0,39061235  | 1,125653669 |  |
| 243093_at    | C2orf49          | -0,299034815 | -1,423348341 | 1,124313527 |  |
| 1556831_at   | DYNC1H1          | -1,2845686   | -2,408705138 | 1,124136537 |  |
| 209765_at    | ADAM19           | -1,2845686   | -2,408705138 | 1,124136537 |  |
| 223614_at    | MMP16            | 0,555999837  | -0,566887459 | 1,122887296 |  |
| 214313_s_at  | EIF5B            | 1,578645857  | 0,456918297  | 1,121727559 |  |
| 207774_at    | ATG10            | -0,033456564 | -1,154897679 | 1,121441115 |  |
| 232521_at    | PCSK7            | 0,44160593   | -0,679763839 | 1,121369769 |  |
| 235313_at    | NRAP             | -0,741668563 | -1,862647763 | 1,1209792   |  |
| 244797_at    | -                | -0,741668563 | -1,862647763 | 1,1209792   |  |
| 218805_at    | GIMAP1-GIMAP5    | 0,900083947  | -0,220592223 | 1,120676171 |  |
| 1553133_at   | C9orf72          | -0,423248115 | -1,541908042 | 1,118659927 |  |
| 226103_at    | NEXN             | 0,503742507  | -0,614371577 | 1,118114084 |  |
| 229368_s_at  | ZFAND5           | -0,259832361 | -1,377419394 | 1,117587033 |  |
| 206587_at    | CCT6B            | -0,79540287  | -1,912089812 | 1,116686942 |  |
| 230355_at    | SEPT7P2          | -0,79540287  | -1,912089812 | 1,116686942 |  |
| 244535_at    | -                | -0,79540287  | -1,912089812 | 1,116686942 |  |
| 217660_at    | MYH14            | -0,148196756 | -1,264005341 | 1,115808584 |  |
| 233630_at    | CDS2             | -1,047650486 | -2,162639771 | 1,114989286 |  |
| 240520_at    | -                | -1,047650486 | -2,162639771 | 1,114989286 |  |
| 241469_at    | HFM1             | -1,047650486 | -2,162639771 | 1,114989286 |  |
| 244395_at    | FLJ41455         | -2,063149277 | -3,177802286 | 1,114653009 |  |
| 1554952_s_at | NLRP12           | -0,67289328  | -1,787089803 | 1,114196523 |  |
| 215580_at    | MCM3AP           | -0,67289328  | -1,787089803 | 1,114196523 |  |
| 243364_at    | AUTS2            | -0,67289328  | -1,787089803 | 1,114196523 |  |
| 202287_s_at  | TACSTD2          | -1,173767127 | -2,286583451 | 1,112816324 |  |
| 244792_at    | -                | -1,173767127 | -2,286583451 | 1,112816324 |  |
| 219505_at    | CECR1            | -0,926850548 | -2,037551727 | 1,110701178 |  |
| 221611_s_at  | PHF7             | -0,926850548 | -2,037551727 | 1,110701178 |  |
| 236520_at    | LOC100507495     | -0,926850548 | -2,037551727 | 1,110701178 |  |
| 237708_at    | -                | -0,926850548 | -2,037551727 | 1,110701178 |  |
| 217005_at    | LDLR             | -0,85085127  | -1,961547147 | 1,110695878 |  |
| 219543_at    | PBLD             | -0,85085127  | -1,961547147 | 1,110695878 |  |
| 242081_at    | ACAP1            | -0,85085127  | -1,961547147 | 1,110695878 |  |
| 204437_s_at  | FOLR1            | -0,221656139 | -1,332017329 | 1,110361191 |  |
| 230774_at    | PTGR2            | 1,732533761  | 0,624460759  | 1,108073002 |  |
| 230679_at    | DCAF10           | 0,376672223  | -0,730778808 | 1,107451031 |  |



|              |                  |              |              |             |  |
|--------------|------------------|--------------|--------------|-------------|--|
| 1554259_at   | GP5M1            | 0,822971223  | -0,283667828 | 1,106639051 |  |
| 206561_s_at  | AKR1B10          | -1,470833215 | -2,575129729 | 1,104296514 |  |
| 226641_at    | ANKRD44          | -1,470833215 | -2,575129729 | 1,104296514 |  |
| 1570276_a_at | GATA4            | -1,399512875 | -2,503677622 | 1,104164747 |  |
| 233627_at    | -                | -1,399512875 | -2,503677622 | 1,104164747 |  |
| 1554743_x_at | PMS1             | -0,43775896  | -1,541908042 | 1,104149082 |  |
| 232784_at    | -                | -0,43775896  | -1,541908042 | 1,104149082 |  |
| 236953_s_at  | NHLRC3           | -0,43775896  | -1,541908042 | 1,104149082 |  |
| 210528_at    | MR1              | -1,518072576 | -2,621331989 | 1,103259414 |  |
| 215181_at    | CDH22            | -0,759588698 | -1,862647763 | 1,103059064 |  |
| 215688_at    | RASGRF1          | -0,512251684 | -1,615132408 | 1,102880723 |  |
| 219310_at    | SYNDIG1          | -1,353583928 | -2,456406426 | 1,102822498 |  |
| 233572_s_at  | BCORL1           | 0,052199481  | -1,050406615 | 1,102606096 |  |
| 237246_at    | -                | 0,052199481  | -1,050406615 | 1,102606096 |  |
| 242386_x_at  | -                | 0,052199481  | -1,050406615 | 1,102606096 |  |
| 217974_at    | TM7SF3           | 0,779676066  | -0,322870281 | 1,102546347 |  |
| 205116_at    | LAMA2            | -0,986356909 | -2,086984744 | 1,100627835 |  |
| 216056_at    | -                | -0,986356909 | -2,086984744 | 1,100627835 |  |
| 1570189_at   | LOC388387        | -1,308181863 | -2,408705138 | 1,100523275 |  |
| 205559_s_at  | PCSK5            | -1,308181863 | -2,408705138 | 1,100523275 |  |
| 203563_at    | AFAP1            | -1,591296941 | -2,690860744 | 1,099563802 |  |
| 240613_at    | JAK1             | -1,591296941 | -2,690860744 | 1,099563802 |  |
| 224491_at    | APOL4            | -0,055687482 | -1,154897679 | 1,099210197 |  |
| 1567010_at   | -                | -0,325749314 | -1,423348341 | 1,097599027 |  |
| 228405_at    | RHPN1            | -0,325749314 | -1,423348341 | 1,097599027 |  |
| 223355_at    | ALG1             | 0,747935635  | -0,34958478  | 1,097520416 |  |
| 1563345_at   | -                | -1,639579028 | -2,735862426 | 1,096283397 |  |
| 1565856_at   | -                | -1,639579028 | -2,735862426 | 1,096283397 |  |
| 236922_at    | -                | -1,240169874 | -2,335104118 | 1,094934243 |  |
| 235586_at    | -                | 0,181384709  | -0,912331589 | 1,093716298 |  |
| 226759_at    | IKZF4            | 0,083054335  | -1,010192375 | 1,09324671  |  |
| 224525_s_at  | OLA1             | -0,285837228 | -1,377419394 | 1,091582166 |  |
| 231607_at    | LOC100507480     | -0,946847173 | -2,037551727 | 1,090704553 |  |
| 233607_at    | -                | -0,946847173 | -2,037551727 | 1,090704553 |  |
| 238166_s_at  | C17orf51 /// FAM | -0,946847173 | -2,037551727 | 1,090704553 |  |
| 204112_s_at  | HNMT             | -1,196375121 | -2,286583451 | 1,090208329 |  |
| 208533_at    | SOX1             | -1,196375121 | -2,286583451 | 1,090208329 |  |
| 236638_at    | FAM123C          | -1,196375121 | -2,286583451 | 1,090208329 |  |
| 1552927_at   | TAB3             | -0,57445847  | -1,663414495 | 1,088956024 |  |
| 202711_at    | EFNB1            | -0,57445847  | -1,663414495 | 1,088956024 |  |
| 219914_at    | ECEL1            | -0,57445847  | -1,663414495 | 1,088956024 |  |
| 1560879_a_at | SYT15            | -0,136301282 | -1,220210588 | 1,083909306 |  |
| 216490_x_at  | -                | -0,136301282 | -1,220210588 | 1,083909306 |  |
| 211213_at    | ORC5             | -1,763254337 | -2,847001814 | 1,083747477 |  |
| 216022_at    | -                | -1,763254337 | -2,847001814 | 1,083747477 |  |
| 204525_at    | PHF14            | 0,317354302  | -0,765504029 | 1,082858331 |  |
| 229379_at    | AHDC1            | 0,03125738   | -1,050406615 | 1,081663995 |  |
| 230476_at    | -                | -1,131062212 | -2,211750327 | 1,080688115 |  |
| 213997_at    | FAM189A1         | -0,706943342 | -1,787089803 | 1,080146461 |  |
| 230156_x_at  | -                | -0,706943342 | -1,787089803 | 1,080146461 |  |
| 205027_s_at  | MAP3K8           | 0,728550685  | -0,34958478  | 1,078135466 |  |
| 229306_at    | C2CD4B           | -1,543331864 | -2,621331989 | 1,078000125 |  |
| 230548_at    | LOC100505942     | -0,467091869 | -1,541908042 | 1,074816173 |  |
| 220300_at    | RGS3             | -1,089016378 | -2,162639771 | 1,073623394 |  |
| 222780_s_at  | BAALC            | -1,089016378 | -2,162639771 | 1,073623394 |  |
| 241225_at    | -                | -1,089016378 | -2,162639771 | 1,073623394 |  |

|              |                 |              |              |             |  |
|--------------|-----------------|--------------|--------------|-------------|--|
| 1561319_at   | OTX2-AS1        | -1,964176657 | -3,037500868 | 1,073324211 |  |
| 1561358_at   | TXLNA           | -0,888496123 | -1,961547147 | 1,073051025 |  |
| 220263_at    | SMAD5-AS1       | -0,888496123 | -1,961547147 | 1,073051025 |  |
| 230690_at    | TUBB1           | -0,888496123 | -1,961547147 | 1,073051025 |  |
| 210626_at    | AKAP1           | -0,543051993 | -1,615132408 | 1,072080415 |  |
| 1553423_a_at | SLFN13          | -0,148196756 | -1,220210588 | 1,072013831 |  |
| 1556589_at   | -               | -0,423248115 | -1,494668682 | 1,071420566 |  |
| 234016_at    | LOC90499        | -0,423248115 | -1,494668682 | 1,071420566 |  |
| 1564921_at   | KRTAP13-1       | 0,020670649  | -1,050406615 | 1,071077264 |  |
| 239753_at    | ZNF252P         | 0,020670649  | -1,050406615 | 1,071077264 |  |
| 230697_at    | BBS5            | -0,352951799 | -1,423348341 | 1,070396543 |  |
| 222262_s_at  | ETNK1           | 0,606430281  | -0,461594427 | 1,068024708 |  |
| 1555363_s_at | LOC284440       | -0,196756757 | -1,264005341 | 1,067248584 |  |
| 230062_at    | RIMBP3 /// RIMB | -0,196756757 | -1,264005341 | 1,067248584 |  |
| 235149_at    | PGM2L1          | -0,196756757 | -1,264005341 | 1,067248584 |  |
| 216721_at    | SLC25A30        | -0,79540287  | -1,862647763 | 1,067244893 |  |
| 241080_at    | -               | -0,79540287  | -1,862647763 | 1,067244893 |  |
| 241327_at    | -               | -0,79540287  | -1,862647763 | 1,067244893 |  |
| 211788_s_at  | TREX2           | -0,67289328  | -1,738067356 | 1,065174076 |  |
| 222656_at    | UBE2W           | 1,442503549  | 0,377530647  | 1,064972902 |  |
| 205117_at    | FGF1            | 0,152582607  | -0,912331589 | 1,064914196 |  |
| 237301_at    | -               | 0,384950573  | -0,679763839 | 1,064714413 |  |
| 240091_at    | PSMA8           | 1,897847661  | 0,835239052  | 1,062608609 |  |
| 213920_at    | CUX2            | -0,85085127  | -1,912089812 | 1,061238542 |  |
| 239828_at    | AKD1            | -0,85085127  | -1,912089812 | 1,061238542 |  |
| 214227_at    | -               | -1,026571149 | -2,086984744 | 1,060413595 |  |
| 228589_at    | BASP1           | -1,026571149 | -2,086984744 | 1,060413595 |  |
| 234371_at    | -               | -1,026571149 | -2,086984744 | 1,060413595 |  |
| 239407_at    | GCFC1-AS1       | -0,055687482 | -1,112851844 | 1,057164362 |  |
| 234653_at    | -               | -0,43775896  | -1,494668682 | 1,056909721 |  |
| 1552986_at   | LOC142937       | -1,399512875 | -2,456406426 | 1,056893551 |  |
| 210728_s_at  | CALCA           | -1,399512875 | -2,456406426 | 1,056893551 |  |
| 1554677_s_at | CMTM4           | -0,366776884 | -1,423348341 | 1,056571458 |  |
| 1557383_a_at | -               | -1,353583928 | -2,408705138 | 1,05512121  |  |
| 201864_at    | GDI1            | 2,254767157  | 1,200746069  | 1,054021088 |  |
| 1562988_at   | ZSCAN30         | -1,838812296 | -2,89013181  | 1,051319514 |  |
| 1560043_at   | CYB5R1          | -1,639579028 | -2,690860744 | 1,051281715 |  |
| 1560557_at   | -               | -1,639579028 | -2,690860744 | 1,051281715 |  |
| 228716_at    | THRB            | -1,639579028 | -2,690860744 | 1,051281715 |  |
| 240974_at    | LOC100506851    | -1,639579028 | -2,690860744 | 1,051281715 |  |
| 206358_at    | PRM1            | -0,986356909 | -2,037551727 | 1,051194818 |  |
| 233551_at    | LOC642776       | -0,986356909 | -2,037551727 | 1,051194818 |  |
| 234416_at    | -               | -0,986356909 | -2,037551727 | 1,051194818 |  |
| 240824_at    | -               | -0,986356909 | -2,037551727 | 1,051194818 |  |
| 207222_at    | LOC100652777 /  | -0,00073712  | -1,050406615 | 1,049669495 |  |
| 239855_at    | PPM1L           | -0,00073712  | -1,050406615 | 1,049669495 |  |
| 230713_at    | -               | 0,82905153   | -0,220592223 | 1,049643754 |  |
| 229303_at    | -               | 1,40228911   | 0,352836757  | 1,049452352 |  |
| 216426_at    | -               | 0,401366113  | -0,646746079 | 1,048112192 |  |
| 221703_at    | BRIP1           | 0,480753764  | -0,566887459 | 1,047641223 |  |
| 228139_at    | RIPK3           | 0,228146222  | -0,819238336 | 1,047384558 |  |
| 1557607_at   | LOC284080       | -1,240169874 | -2,286583451 | 1,046413576 |  |
| 1558983_at   | LRRC41          | -1,240169874 | -2,286583451 | 1,046413576 |  |
| 1564621_a_at | MEI1            | -1,240169874 | -2,286583451 | 1,046413576 |  |
| 240567_at    | -               | -1,240169874 | -2,286583451 | 1,046413576 |  |
| 241629_at    | -               | -0,285837228 | -1,332017329 | 1,046180101 |  |

|              |                  |              |              |             |  |
|--------------|------------------|--------------|--------------|-------------|--|
| 1558791_at   | LOC286467        | -0,741668563 | -1,787089803 | 1,04542124  |  |
| 240324_at    | -                | -0,741668563 | -1,787089803 | 1,04542124  |  |
| 1555766_a_at | GNG2             | 0,133056859  | -0,912331589 | 1,045388447 |  |
| 206336_at    | CXCL6            | 0,822971223  | -0,220592223 | 1,043563447 |  |
| 218513_at    | TMA16            | 2,493593689  | 1,450051551  | 1,043542138 |  |
| 1556144_at   | DHX30            | -0,221656139 | -1,264005341 | 1,042349202 |  |
| 212524_x_at  | H2AFX            | -0,221656139 | -1,264005341 | 1,042349202 |  |
| 243612_at    | NSD1             | -0,221656139 | -1,264005341 | 1,042349202 |  |
| 233946_at    | SMU1             | -0,112808516 | -1,154897679 | 1,042089162 |  |
| 220379_at    | FSCN3            | 0,03125738   | -1,010192375 | 1,041449755 |  |
| 242265_at    | BRD8             | 0,03125738   | -1,010192375 | 1,041449755 |  |
| 229991_s_at  | SYTL4            | 0,995078803  | -0,046302147 | 1,04138095  |  |
| 227462_at    | ERAP2            | -0,57445847  | -1,615132408 | 1,040673938 |  |
| 1556107_at   | -                | 0,425644434  | -0,614371577 | 1,04001601  |  |
| 1563003_at   | ITGAX            | -1,047650486 | -2,086984744 | 1,039334258 |  |
| 219903_s_at  | CYP2C8           | -1,047650486 | -2,086984744 | 1,039334258 |  |
| 223998_at    | TTLL2            | -1,047650486 | -2,086984744 | 1,039334258 |  |
| 230038_at    | ATXN7L2          | -1,047650486 | -2,086984744 | 1,039334258 |  |
| 235455_at    | FAM131C          | -1,047650486 | -2,086984744 | 1,039334258 |  |
| 239970_at    | -                | -1,047650486 | -2,086984744 | 1,039334258 |  |
| 1562908_at   | LOC339468        | -2,138804305 | -3,177802286 | 1,038997981 |  |
| 206297_at    | CTRC             | 0,273439642  | -0,765504029 | 1,038943671 |  |
| 241920_x_at  | SPG11            | -1,173767127 | -2,211750327 | 1,037983201 |  |
| 213281_at    | JUN              | 1,011212064  | -0,024572586 | 1,03578465  |  |
| 1562581_at   | LOC254028        | -0,078265071 | -1,112851844 | 1,034586773 |  |
| 242928_at    | -                | -0,078265071 | -1,112851844 | 1,034586773 |  |
| 1558683_a_at | HMGA2            | -1,812418401 | -2,847001814 | 1,034583413 |  |
| 204446_s_at  | ALOX5            | -1,812418401 | -2,847001814 | 1,034583413 |  |
| 1554274_a_at | SSH1             | -0,299034815 | -1,332017329 | 1,032982514 |  |
| 1568814_at   | DDX50            | -0,299034815 | -1,332017329 | 1,032982514 |  |
| 229760_at    | VEPH1            | -0,299034815 | -1,332017329 | 1,032982514 |  |
| 228343_at    | POU2F2           | -1,470833215 | -2,503677622 | 1,032844407 |  |
| 243746_at    | IGHMBP2          | -1,470833215 | -2,503677622 | 1,032844407 |  |
| 243781_at    | -                | -1,424023738 | -2,456406426 | 1,032382688 |  |
| 221681_s_at  | DSPP             | -1,964176657 | -2,996335703 | 1,032159046 |  |
| 213882_at    | TM2D1            | 0,641402394  | -0,39061235  | 1,032014745 |  |
| 1558560_s_at | BLZF1            | -1,543331864 | -2,575129729 | 1,031797865 |  |
| 220116_at    | KCNN2            | -1,543331864 | -2,575129729 | 1,031797865 |  |
| 228554_at    | PGR              | -1,543331864 | -2,575129729 | 1,031797865 |  |
| 1565775_at   | PIEZO2           | -1,131062212 | -2,162639771 | 1,031577559 |  |
| 231066_s_at  | CLCN4            | -1,131062212 | -2,162639771 | 1,031577559 |  |
| 237635_at    | LOC100128164     | -1,131062212 | -2,162639771 | 1,031577559 |  |
| 1558855_at   | FARP2            | -0,706943342 | -1,738067356 | 1,031124014 |  |
| 221186_at    | LOC100131532     | -0,706943342 | -1,738067356 | 1,031124014 |  |
| 1561973_at   | SMARCC2          | -0,83191556  | -1,862647763 | 1,030732203 |  |
| 207681_at    | CXCR3            | -0,83191556  | -1,862647763 | 1,030732203 |  |
| 214329_x_at  | TNFSF10          | -0,83191556  | -1,862647763 | 1,030732203 |  |
| 238275_at    | HAP1             | -0,83191556  | -1,862647763 | 1,030732203 |  |
| 240583_at    | RIOK3            | -0,83191556  | -1,862647763 | 1,030732203 |  |
| 1554216_at   | CCDC132          | -1,591296941 | -2,621331989 | 1,030035048 |  |
| 211904_x_at  | RAD52            | -0,394749123 | -1,423348341 | 1,028599218 |  |
| 233520_s_at  | CMYA5            | -0,022466681 | -1,050406615 | 1,027939934 |  |
| 230600_at    | LRRC46           | -0,467091869 | -1,494668682 | 1,027576813 |  |
| 231449_at    | -                | -0,467091869 | -1,494668682 | 1,027576813 |  |
| 238616_at    | QDPR             | -0,467091869 | -1,494668682 | 1,027576813 |  |
| 222281_s_at  | C1orf186 /// LOC | -0,759588698 | -1,787089803 | 1,027501105 |  |



|              |              |              |              |             |  |
|--------------|--------------|--------------|--------------|-------------|--|
| 244704_at    | NFYB         | -0,759588698 | -1,787089803 | 1,027501105 |  |
| 239132_at    | NOS1         | -1,308181863 | -2,335104118 | 1,026922255 |  |
| 241481_at    | FAM81A       | -1,308181863 | -2,335104118 | 1,026922255 |  |
| 1562792_at   | NIPAL1       | -0,59053611  | -1,615132408 | 1,024596297 |  |
| 230301_at    | -            | -0,59053611  | -1,615132408 | 1,024596297 |  |
| 214593_at    | PIAS2        | -2,01371626  | -3,037500868 | 1,023784608 |  |
| 1569172_a_at | LOC402160    | -0,888496123 | -1,912089812 | 1,023593689 |  |
| 205591_at    | OLFM1        | -0,888496123 | -1,912089812 | 1,023593689 |  |
| 206089_at    | NELL1        | -0,888496123 | -1,912089812 | 1,023593689 |  |
| 214175_x_at  | PDLIM4       | -0,888496123 | -1,912089812 | 1,023593689 |  |
| 236845_at    | TRIM62       | -0,888496123 | -1,912089812 | 1,023593689 |  |
| 205636_at    | SH3GL3       | -0,196756757 | -1,220210588 | 1,023453831 |  |
| 243212_at    | LOC100505820 | -0,089689931 | -1,112851844 | 1,023161913 |  |
| 239161_at    | FDX1         | 0,255492549  | -0,765504029 | 1,020996578 |  |
| 209135_at    | ASPH         | 1,515954005  | 0,495031851  | 1,020922155 |  |
| 235311_at    | FKBP14       | -0,136301282 | -1,154897679 | 1,018596397 |  |
| 240919_at    | -            | -0,136301282 | -1,154897679 | 1,018596397 |  |
| 1556803_at   | POLR3B       | -1,763254337 | -2,780313924 | 1,017059587 |  |
| 239533_at    | GPR155       | -1,763254337 | -2,780313924 | 1,017059587 |  |
| 243497_at    | -            | -1,937711681 | -2,954576755 | 1,016865074 |  |
| 223190_s_at  | MLL5         | 3,606946883  | 2,590852465  | 1,016094418 |  |
| 65718_at     | GPR124       | -0,095377784 | -1,111383214 | 1,016005431 |  |
| 207965_at    | NEUROG3      | -1,196375121 | -2,211750327 | 1,015375206 |  |
| 236020_s_at  | TRUB1        | -1,196375121 | -2,211750327 | 1,015375206 |  |
| 239550_at    | RORA         | -1,196375121 | -2,211750327 | 1,015375206 |  |
| 204909_at    | DDX6         | -0,946847173 | -1,961547147 | 1,014699974 |  |
| 205317_s_at  | SLC15A2      | -0,946847173 | -1,961547147 | 1,014699974 |  |
| 206273_at    | SLMO1        | -0,946847173 | -1,961547147 | 1,014699974 |  |
| 227933_at    | LINGO1       | -0,946847173 | -1,961547147 | 1,014699974 |  |
| 211078_s_at  | STK3         | 0,334552598  | -0,679763839 | 1,014316438 |  |
| 218180_s_at  | EPS8L2       | 0,246434561  | -0,765504029 | 1,01193859  |  |
| 221841_s_at  | KLF4         | -0,85085127  | -1,862647763 | 1,011796493 |  |
| 238111_at    | SDCCAG3      | -0,85085127  | -1,862647763 | 1,011796493 |  |
| 239741_at    | PYGO1        | -0,85085127  | -1,862647763 | 1,011796493 |  |
| 205434_s_at  | AAK1         | 2,361396186  | 1,349621332  | 1,011774854 |  |
| 205678_at    | AP3B2        | -1,026571149 | -2,037551727 | 1,010980578 |  |
| 227589_at    | PITPNC1      | -1,026571149 | -2,037551727 | 1,010980578 |  |
| 235979_at    | C7           | -1,026571149 | -2,037551727 | 1,010980578 |  |
| 239929_at    | PM20D1       | -1,026571149 | -2,037551727 | 1,010980578 |  |
| 242271_at    | SLC26A9      | -1,026571149 | -2,037551727 | 1,010980578 |  |
| 1566526_at   | LOC283688    | -0,366776884 | -1,377419394 | 1,01064251  |  |
| 223601_at    | OLFM2        | -0,366776884 | -1,377419394 | 1,01064251  |  |
| 243451_at    | -            | -0,366776884 | -1,377419394 | 1,01064251  |  |
| 221975_s_at  | C21orf2      | -0,00073712  | -1,010192375 | 1,009455255 |  |
| 229581_at    | ELFN1        | -0,00073712  | -1,010192375 | 1,009455255 |  |
| 229569_at    | -            | -1,399512875 | -2,408705138 | 1,009192262 |  |
| 232179_at    | LOC158863    | -1,399512875 | -2,408705138 | 1,009192262 |  |
| 229839_at    | SCARA5       | -1,838812296 | -2,847001814 | 1,008189518 |  |
| 205567_at    | CHST1        | -0,655928373 | -1,663414495 | 1,007486122 |  |
| 207205_at    | CEACAM4      | -0,148196756 | -1,154897679 | 1,006700922 |  |
| 234747_at    | TRAPPC11     | -0,325749314 | -1,332017329 | 1,006268015 |  |
| 212364_at    | MYO1B        | 0,273439642  | -0,730778808 | 1,00421845  |  |
| 220905_at    | -            | 0,052199481  | -0,950686014 | 1,002885495 |  |
| 233539_at    | NAPEPLD      | 0,052199481  | -0,950686014 | 1,002885495 |  |
| 1553412_at   | AGBL4        | -1,688127507 | -2,690860744 | 1,002733237 |  |
| 1563563_at   | CCDC40       | -1,688127507 | -2,690860744 | 1,002733237 |  |

|              |                 |              |              |             |  |
|--------------|-----------------|--------------|--------------|-------------|--|
| 211303_x_at  | FOLH1B          | -1,688127507 | -2,690860744 | 1,002733237 |  |
| 234440_at    | TRDV3           | -1,688127507 | -2,690860744 | 1,002733237 |  |
| 1557754_at   | LOC401068       | -1,2845686   | -2,286583451 | 1,00201485  |  |
| 231268_at    | LOC645895 /// M | -1,2845686   | -2,286583451 | 1,00201485  |  |
| 231580_at    | LOC100506542    | -1,2845686   | -2,286583451 | 1,00201485  |  |
| 241059_at    | -               | -1,2845686   | -2,286583451 | 1,00201485  |  |
| 241686_x_at  | -               | 0,181384709  | -0,819238336 | 1,000623045 |  |
| 229027_at    | PPM1A           | 1,394109935  | 0,393761504  | 1,000348431 |  |
| 1560001_at   | LOC100131581    | -0,423248115 | -1,423348341 | 1,000100226 |  |
| 1570349_at   | -               | -0,423248115 | -1,423348341 | 1,000100226 |  |
| 210324_at    | C8G             | -0,423248115 | -1,423348341 | 1,000100226 |  |
| 1552559_a_at | CDK15           | -0,543051993 | -1,541908042 | 0,998856049 |  |
| 206578_at    | NKX2-5          | -0,543051993 | -1,541908042 | 0,998856049 |  |
| 211238_at    | ADAM7           | -0,543051993 | -1,541908042 | 0,998856049 |  |
| 228673_s_at  | -               | -0,543051993 | -1,541908042 | 0,998856049 |  |
| 1566900_at   | -               | -1,089016378 | -2,086984744 | 0,997968366 |  |
| 232395_x_at  | AGBL3           | -1,089016378 | -2,086984744 | 0,997968366 |  |
| 241451_s_at  | -               | 0,317354302  | -0,679763839 | 0,997118141 |  |
| 228751_at    | CLK4            | 0,606430281  | -0,39061235  | 0,997042632 |  |
| 215955_x_at  | ARHGAP26        | -0,741668563 | -1,738067356 | 0,996398793 |  |
| 223942_x_at  | CHST5           | -0,055687482 | -1,050406615 | 0,994719133 |  |
| 240084_at    | CBX2            | 0,457392764  | -0,536087151 | 0,993479915 |  |
| 1559495_at   | -               | -0,79540287  | -1,787089803 | 0,991686933 |  |
| 237675_at    | -               | -0,79540287  | -1,787089803 | 0,991686933 |  |
| 238843_at    | NPHP1           | -0,79540287  | -1,787089803 | 0,991686933 |  |
| 244362_at    | -               | -0,79540287  | -1,787089803 | 0,991686933 |  |
| 224475_at    | -               | 0,171847695  | -0,819238336 | 0,991086032 |  |
| 1552541_at   | TAGAP           | 0,888485433  | -0,102100538 | 0,990585971 |  |
| 235844_at    | PHTF1           | -0,67289328  | -1,663414495 | 0,990521215 |  |
| 227695_at    | GLYATL1 /// LOC | -1,047650486 | -2,037551727 | 0,989901241 |  |
| 209949_at    | NCF2            | -1,173767127 | -2,162639771 | 0,988872645 |  |
| 228489_at    | TM4SF18         | -1,173767127 | -2,162639771 | 0,988872645 |  |
| 1569024_at   | FAM13A          | -0,022466681 | -1,010192375 | 0,987725694 |  |
| 221854_at    | PKP1            | -0,022466681 | -1,010192375 | 0,987725694 |  |
| 220998_s_at  | UNC93B1         | 0,995078803  | 0,007421914  | 0,987656889 |  |
| 226962_at    | ZBTB41          | 0,496120222  | -0,490927335 | 0,987047557 |  |
| 232110_at    | GALNT5          | 0,255492549  | -0,730778808 | 0,986271357 |  |
| 235635_at    | ARHGAP5         | 0,255492549  | -0,730778808 | 0,986271357 |  |
| 243815_at    | PGBD4           | -0,234278768 | -1,220210588 | 0,98593182  |  |
| 244487_at    | -               | -0,234278768 | -1,220210588 | 0,98593182  |  |
| 1556618_at   | -               | -1,518072576 | -2,503677622 | 0,985605047 |  |
| 1568665_at   | RNF103          | -1,518072576 | -2,503677622 | 0,985605047 |  |
| 1570627_at   | TCEB3           | -1,518072576 | -2,503677622 | 0,985605047 |  |
| 216198_at    | ATF7IP          | -1,518072576 | -2,503677622 | 0,985605047 |  |
| 228791_at    | LOC100129502    | -1,518072576 | -2,503677622 | 0,985605047 |  |
| 229543_at    | -               | -1,518072576 | -2,503677622 | 0,985605047 |  |
| 1562532_at   | -               | -1,470833215 | -2,456406426 | 0,985573211 |  |
| 1566783_at   | -               | -1,470833215 | -2,456406426 | 0,985573211 |  |
| 240100_at    | LOC100505920    | -1,470833215 | -2,456406426 | 0,985573211 |  |
| 1564765_at   | -               | -0,926850548 | -1,912089812 | 0,985239264 |  |
| 217396_at    | -               | -0,926850548 | -1,912089812 | 0,985239264 |  |
| 1570546_a_at | TACC2           | -1,424023738 | -2,408705138 | 0,984681399 |  |
| 231332_at    | -               | -1,424023738 | -2,408705138 | 0,984681399 |  |
| 236602_at    | -               | -1,424023738 | -2,408705138 | 0,984681399 |  |
| 241523_at    | -               | -1,591296941 | -2,575129729 | 0,983832788 |  |
| 1552727_s_at | ADAMTS17        | -0,172274514 | -1,154897679 | 0,982623165 |  |

|              |                |              |              |             |  |
|--------------|----------------|--------------|--------------|-------------|--|
| 210148_at    | HIPK3          | -0,172274514 | -1,154897679 | 0,982623165 |  |
| 229389_at    | ATG16L2        | -0,172274514 | -1,154897679 | 0,982623165 |  |
| 236998_at    | CCDC56         | -0,172274514 | -1,154897679 | 0,982623165 |  |
| 239713_at    | CASC2          | -2,01371626  | -2,996335703 | 0,982619443 |  |
| 204199_at    | RALGPS1        | -0,512251684 | -1,494668682 | 0,982416997 |  |
| 221986_s_at  | KLHL24         | -0,512251684 | -1,494668682 | 0,982416997 |  |
| 239011_at    | PRKCE          | -1,639579028 | -2,621331989 | 0,981752961 |  |
| 208538_at    | ANP32C         | -1,353583928 | -2,335104118 | 0,98152019  |  |
| 227310_at    | ADSS           | -1,353583928 | -2,335104118 | 0,98152019  |  |
| 237524_at    | -              | -1,353583928 | -2,335104118 | 0,98152019  |  |
| 223511_at    | SPRTN          | 1,274448124  | 0,293518836  | 0,980929288 |  |
| 206675_s_at  | SKIL           | -0,352951799 | -1,332017329 | 0,979065531 |  |
| 204470_at    | CXCL1          | -0,759588698 | -1,738067356 | 0,978478658 |  |
| 205710_at    | LRP2           | -0,759588698 | -1,738067356 | 0,978478658 |  |
| 206681_x_at  | GP2            | -0,759588698 | -1,738067356 | 0,978478658 |  |
| 230414_s_at  | TMEM170A       | -0,759588698 | -1,738067356 | 0,978478658 |  |
| 231322_at    | -              | -0,759588698 | -1,738067356 | 0,978478658 |  |
| 1569900_at   | FLJ16124       | -1,308181863 | -2,286583451 | 0,978401588 |  |
| 217538_at    | SGSM2          | -1,308181863 | -2,286583451 | 0,978401588 |  |
| 222534_s_at  | INF2           | -1,308181863 | -2,286583451 | 0,978401588 |  |
| 236230_at    | -              | -1,308181863 | -2,286583451 | 0,978401588 |  |
| 236842_at    | LOC100506252   | -1,308181863 | -2,286583451 | 0,978401588 |  |
| 237466_s_at  | HHIP           | -0,285837228 | -1,264005341 | 0,978168112 |  |
| 217176_s_at  | ZFX            | 0,246434561  | -0,730778808 | 0,977213369 |  |
| 229861_at    | -              | 0,984222186  | 0,007421914  | 0,976800272 |  |
| 215196_at    | -              | -0,033456564 | -1,010192375 | 0,976735811 |  |
| 207164_s_at  | ZNF238         | -0,986356909 | -1,961547147 | 0,975190239 |  |
| 230888_at    | WDR91          | -0,986356909 | -1,961547147 | 0,975190239 |  |
| 231559_at    | LOC100506941   | -0,986356909 | -1,961547147 | 0,975190239 |  |
| 1567270_at   | -              | -2,063149277 | -3,037500868 | 0,974351591 |  |
| 207554_x_at  | TBXA2R         | 0,359971644  | -0,614371577 | 0,974343221 |  |
| 242456_at    | MRE11A         | -0,888496123 | -1,862647763 | 0,97415164  |  |
| 243706_at    | CDO1           | -0,888496123 | -1,862647763 | 0,97415164  |  |
| 217604_at    | -              | 1,177702228  | 0,204310755  | 0,973391472 |  |
| 217236_x_at  | IGH@ /// IGHA1 | -1,763254337 | -2,735862426 | 0,972608089 |  |
| 205684_s_at  | DENND4C        | 1,789769151  | 0,817300337  | 0,972468814 |  |
| 218637_at    | IMPACT         | 1,596577845  | 0,624460759  | 0,972117086 |  |
| 209543_s_at  | CD34           | 0,152582607  | -0,819238336 | 0,971820943 |  |
| 1557380_at   | AGAP11         | -1,240169874 | -2,211750327 | 0,971580453 |  |
| 227225_at    | ZNF503         | -1,240169874 | -2,211750327 | 0,971580453 |  |
| 244377_at    | SLC1A4         | -1,240169874 | -2,211750327 | 0,971580453 |  |
| 244525_at    | -              | -1,240169874 | -2,211750327 | 0,971580453 |  |
| 217964_at    | TTC19          | 3,925549439  | 2,957221307  | 0,968328133 |  |
| 239260_at    | CORIN          | -1,812418401 | -2,780313924 | 0,967895523 |  |
| 243234_at    | TBX3           | -1,812418401 | -2,780313924 | 0,967895523 |  |
| 231324_at    | -              | -0,57445847  | -1,541908042 | 0,967449572 |  |
| 238072_at    | CLK3           | -0,57445847  | -1,541908042 | 0,967449572 |  |
| 242577_at    | LOC389834      | -0,57445847  | -1,541908042 | 0,967449572 |  |
| 1561116_at   | -              | -1,196375121 | -2,162639771 | 0,96626465  |  |
| 237321_at    | LOC100506457   | -1,196375121 | -2,162639771 | 0,96626465  |  |
| 1554324_s_at | DYNC2LI1       | -0,946847173 | -1,912089812 | 0,965242639 |  |
| 212172_at    | AK2            | -0,946847173 | -1,912089812 | 0,965242639 |  |
| 217634_at    | SVIL           | -0,946847173 | -1,912089812 | 0,965242639 |  |
| 230307_at    | LOC100129794   | -0,946847173 | -1,912089812 | 0,965242639 |  |
| 240559_at    | IZUMO2         | -0,946847173 | -1,912089812 | 0,965242639 |  |
| 219368_at    | NAP1L2         | -0,366776884 | -1,332017329 | 0,965240445 |  |



|              |              |              |              |             |  |
|--------------|--------------|--------------|--------------|-------------|--|
| 215421_at    | LOC100131510 | -0,299034815 | -1,264005341 | 0,964970526 |  |
| 1570108_at   | -            | -0,148196756 | -1,112851844 | 0,964655088 |  |
| 234870_at    | TANC1        | -0,148196756 | -1,112851844 | 0,964655088 |  |
| 238972_at    | -            | 0,052199481  | -0,912331589 | 0,964531069 |  |
| 241533_at    | LOC731656    | 0,767063567  | -0,19610998  | 0,963173547 |  |
| 219664_s_at  | DECR2        | 2,277177578  | 1,315948728  | 0,96122885  |  |
| 219290_x_at  | DAPP1        | 0,859074518  | -0,102100538 | 0,961175056 |  |
| 1568822_at   | GTPBP5       | -0,089689931 | -1,050406615 | 0,960716684 |  |
| 203604_at    | ZNF516       | -0,259832361 | -1,220210588 | 0,960378226 |  |
| 211565_at    | SH3GL3       | -0,259832361 | -1,220210588 | 0,960378226 |  |
| 228913_at    | TPT1-AS1     | -0,259832361 | -1,220210588 | 0,960378226 |  |
| 1562945_at   | -            | -1,543331864 | -2,503677622 | 0,960345758 |  |
| 229170_s_at  | TTC18        | -1,543331864 | -2,503677622 | 0,960345758 |  |
| 232674_at    | UCN2         | -1,543331864 | -2,503677622 | 0,960345758 |  |
| 233436_at    | MTBP         | -1,543331864 | -2,503677622 | 0,960345758 |  |
| 220316_at    | NPAS3        | -0,655928373 | -1,615132408 | 0,959204035 |  |
| 1561237_at   | -            | -1,888254346 | -2,847001814 | 0,958747469 |  |
| 230952_at    | -            | -1,888254346 | -2,847001814 | 0,958747469 |  |
| 243571_at    | -            | -1,888254346 | -2,847001814 | 0,958747469 |  |
| 205617_at    | PRRG2        | 0,496120222  | -0,461594427 | 0,957714648 |  |
| 205879_x_at  | RET          | 0,496120222  | -0,461594427 | 0,957714648 |  |
| 1558604_a_at | SSBP2        | -0,706943342 | -1,663414495 | 0,956471153 |  |
| 229866_at    | STK32A       | -0,706943342 | -1,663414495 | 0,956471153 |  |
| 226997_at    | ADAMTS12     | -0,467091869 | -1,423348341 | 0,956256473 |  |
| 242004_x_at  | -            | -0,467091869 | -1,423348341 | 0,956256473 |  |
| 235178_x_at  | ESCO2        | 0,46522187   | -0,490927335 | 0,956149205 |  |
| 1568126_at   | ANXA2        | -1,131062212 | -2,086984744 | 0,955922531 |  |
| 232080_at    | HECW2        | -1,131062212 | -2,086984744 | 0,955922531 |  |
| 226341_at    | LOC100506365 | 1,995690482  | 1,039887232  | 0,955803251 |  |
| 202022_at    | ALDOC        | 0,735041319  | -0,220592223 | 0,955633543 |  |
| 1566208_at   | TCEA1        | -0,83191556  | -1,787089803 | 0,955174243 |  |
| 217153_at    | ARHGAP1      | -0,83191556  | -1,787089803 | 0,955174243 |  |
| 235620_x_at  | ZMYM5        | -0,055687482 | -1,010192375 | 0,954504893 |  |
| 220342_x_at  | EDEM3        | 1,063722698  | 0,109221392  | 0,954501305 |  |
| 227744_s_at  | HNRNPD       | -0,423248115 | -1,377419394 | 0,954171279 |  |
| 214120_at    | RFPL1-AS1    | 0,417596971  | -0,536087151 | 0,953684121 |  |
| 229075_at    | SPATA5       | 1,829737795  | 0,876248481  | 0,953489314 |  |
| 1559509_at   | -            | 0,273439642  | -0,679763839 | 0,953203481 |  |
| 231193_s_at  | -            | -1,937711681 | -2,89013181  | 0,952420129 |  |
| 231560_at    | -            | -1,937711681 | -2,89013181  | 0,952420129 |  |
| 244814_at    | UGGT1        | 0,133056859  | -0,819238336 | 0,952295195 |  |
| 212917_x_at  | RECQL        | 2,577249059  | 1,6252386    | 0,952010458 |  |
| 1559078_at   | -            | -0,543051993 | -1,494668682 | 0,951616688 |  |
| 1565082_x_at | SRC          | -0,543051993 | -1,494668682 | 0,951616688 |  |
| 206195_x_at  | GH2          | -0,543051993 | -1,494668682 | 0,951616688 |  |
| 222862_s_at  | AK5          | -0,543051993 | -1,494668682 | 0,951616688 |  |
| 1562624_at   | -            | -0,59053611  | -1,541908042 | 0,951371932 |  |
| 202036_s_at  | SFRP1        | -0,59053611  | -1,541908042 | 0,951371932 |  |
| 230393_at    | CUL5         | -0,59053611  | -1,541908042 | 0,951371932 |  |
| 233513_at    | -            | -0,59053611  | -1,541908042 | 0,951371932 |  |
| 237852_at    | -            | -0,59053611  | -1,541908042 | 0,951371932 |  |
| 217599_s_at  | MDFIC        | 1,079110292  | 0,128747141  | 0,950363151 |  |
| 206130_s_at  | ASGR2        | -0,00073712  | -0,950686014 | 0,949948894 |  |
| 211830_s_at  | CACNA1I      | -0,00073712  | -0,950686014 | 0,949948894 |  |
| 208016_s_at  | AGTR1        | 1,481627361  | 0,532164371  | 0,949462991 |  |
| 210353_s_at  | SLC6A2       | -1,089016378 | -2,037551727 | 0,948535349 |  |

|              |                 |              |              |             |  |
|--------------|-----------------|--------------|--------------|-------------|--|
| 220130_x_at  | LTB4R2          | -1,089016378 | -2,037551727 | 0,948535349 |  |
| 222377_at    | TBX10           | -1,089016378 | -2,037551727 | 0,948535349 |  |
| 244190_at    | THAP5           | -1,089016378 | -2,037551727 | 0,948535349 |  |
| 214612_x_at  | MAGEA6          | -2,089474779 | -3,037500868 | 0,948026089 |  |
| 223918_at    | ACSL6 /// LOC10 | -2,089474779 | -3,037500868 | 0,948026089 |  |
| 233465_at    | -               | -2,089474779 | -3,037500868 | 0,948026089 |  |
| 1553970_s_at | CEL             | 0,555999837  | -0,39061235  | 0,946612187 |  |
| 223846_at    | AZI2            | 0,03125738   | -0,912331589 | 0,943588969 |  |
| 238191_at    | -               | 0,03125738   | -0,912331589 | 0,943588969 |  |
| 206739_at    | HOXC5           | 0,376672223  | -0,566887459 | 0,943559683 |  |
| 1569479_at   | ZNF718          | -0,79540287  | -1,738067356 | 0,942664486 |  |
| 231102_at    | CROT            | -0,79540287  | -1,738067356 | 0,942664486 |  |
| 1552724_at   | RHOXF1          | 0,123193849  | -0,819238336 | 0,942432186 |  |
| 210375_at    | PTGER3          | 0,480753764  | -0,461594427 | 0,94234819  |  |
| 1570090_at   | -               | -0,67289328  | -1,615132408 | 0,942239128 |  |
| 216528_at    | -               | -0,67289328  | -1,615132408 | 0,942239128 |  |
| 230956_at    | C11orf92        | -0,67289328  | -1,615132408 | 0,942239128 |  |
| 237028_at    | ENO1-AS1        | -0,67289328  | -1,615132408 | 0,942239128 |  |
| 242205_at    | -               | -0,67289328  | -1,615132408 | 0,942239128 |  |
| 236115_at    | HTR7P1          | -1,838812296 | -2,780313924 | 0,941501628 |  |
| 239639_at    | -               | -1,838812296 | -2,780313924 | 0,941501628 |  |
| 216228_s_at  | WDHD1           | 2,466546243  | 1,525647381  | 0,940898863 |  |
| 220549_at    | FSBP /// RAD54E | 0,209623097  | -0,730778808 | 0,940401905 |  |
| 1564473_at   | ESCO2           | -1,518072576 | -2,456406426 | 0,938333385 |  |
| 221590_s_at  | ALDH6A1         | -1,518072576 | -2,456406426 | 0,938333385 |  |
| 237248_at    | PDE11A          | -1,518072576 | -2,456406426 | 0,938333385 |  |
| 237629_at    | -               | -1,518072576 | -2,456406426 | 0,938333385 |  |
| 244255_at    | LOC286114       | -1,518072576 | -2,456406426 | 0,938333385 |  |
| 244735_at    | CCDC54          | -1,518072576 | -2,456406426 | 0,938333385 |  |
| 1553272_at   | SLC36A1         | -0,325749314 | -1,264005341 | 0,938256027 |  |
| 1561323_at   | LOC339975       | -0,325749314 | -1,264005341 | 0,938256027 |  |
| 201265_at    | -               | -0,325749314 | -1,264005341 | 0,938256027 |  |
| 243166_at    | SLC30A5         | 0,291166226  | -0,646746079 | 0,937912304 |  |
| 207475_at    | FABP2           | -1,470833215 | -2,408705138 | 0,937871922 |  |
| 210034_s_at  | RPL5 /// SNORD  | -0,112808516 | -1,050406615 | 0,937598099 |  |
| 222091_at    | HPCAL4          | -0,394749123 | -1,332017329 | 0,937268206 |  |
| 219003_s_at  | MANEA           | 2,182996494  | 1,246149888  | 0,936846606 |  |
| 1561443_at   | -               | -0,85085127  | -1,787089803 | 0,936238533 |  |
| 1565805_at   | -               | -0,85085127  | -1,787089803 | 0,936238533 |  |
| 1569894_at   | PPP2R3C         | -0,85085127  | -1,787089803 | 0,936238533 |  |
| 240513_at    | EIF3M           | -0,85085127  | -1,787089803 | 0,936238533 |  |
| 243062_at    | FLCN            | -0,85085127  | -1,787089803 | 0,936238533 |  |
| 208080_at    | AURKA           | 0,715481152  | -0,220592223 | 0,936073375 |  |
| 243201_at    | RPL36A          | -0,926850548 | -1,862647763 | 0,935797214 |  |
| 215658_at    | LOC100289255    | -1,399512875 | -2,335104118 | 0,935591243 |  |
| 1553759_at   | MCM9            | -1,639579028 | -2,575129729 | 0,935550701 |  |
| 1564590_a_at | OFCC1           | -1,639579028 | -2,575129729 | 0,935550701 |  |
| 233720_at    | SORBS2          | -1,639579028 | -2,575129729 | 0,935550701 |  |
| 235342_at    | SPOCK3          | -1,639579028 | -2,575129729 | 0,935550701 |  |
| 224997_x_at  | H19 /// MIR675  | 0,255492549  | -0,679763839 | 0,935256389 |  |
| 207556_s_at  | DGKZ            | 1,81142822   | 0,876248481  | 0,935179739 |  |
| 1568934_at   | CX3CR1          | -1,026571149 | -1,961547147 | 0,934975999 |  |
| 210315_at    | SYN2            | -1,026571149 | -1,961547147 | 0,934975999 |  |
| 214551_s_at  | CD7             | -1,026571149 | -1,961547147 | 0,934975999 |  |
| 242042_s_at  | HOXD-AS1        | -1,026571149 | -1,961547147 | 0,934975999 |  |
| 1565627_a_at | -               | -0,285837228 | -1,220210588 | 0,934373359 |  |

|              |                 |              |              |             |  |
|--------------|-----------------|--------------|--------------|-------------|--|
| 205665_at    | TSPAN9          | -0,285837228 | -1,220210588 | 0,934373359 |  |
| 202650_s_at  | KIAA0195        | 1,201332287  | 0,26733076   | 0,934001527 |  |
| 1555868_at   | LOC100507477    | -1,688127507 | -2,621331989 | 0,933204483 |  |
| 232262_at    | PIGL            | 0,020670649  | -0,912331589 | 0,933002238 |  |
| 1552448_a_at | C8orf12         | -1,353583928 | -2,286583451 | 0,932999523 |  |
| 1561708_at   | MB21D1          | -1,353583928 | -2,286583451 | 0,932999523 |  |
| 1563553_at   | -               | -1,353583928 | -2,286583451 | 0,932999523 |  |
| 227282_at    | PCDH19          | -1,353583928 | -2,286583451 | 0,932999523 |  |
| 229171_at    | CENPBD1         | -1,353583928 | -2,286583451 | 0,932999523 |  |
| 242005_at    | LOC100506377    | -1,353583928 | -2,286583451 | 0,932999523 |  |
| 1552279_a_at | SLC46A1         | 0,44160593   | -0,490927335 | 0,932533265 |  |
| 1559496_at   | PPA2            | -0,078265071 | -1,010192375 | 0,931927304 |  |
| 222179_at    | CDC5L           | 0,541261317  | -0,39061235  | 0,931873667 |  |
| 244427_at    | KIF23           | 0,606430281  | -0,322870281 | 0,929300563 |  |
| 228941_at    | ALG10B          | 0,882651021  | -0,046302147 | 0,928953168 |  |
| 1554692_at   | SLC23A2         | -1,763254337 | -2,690860744 | 0,927606407 |  |
| 230931_at    | PLG             | -1,763254337 | -2,690860744 | 0,927606407 |  |
| 1565338_x_at | DNAH6           | -1,2845686   | -2,211750327 | 0,927181727 |  |
| 216140_at    | -               | -1,2845686   | -2,211750327 | 0,927181727 |  |
| 205357_s_at  | AGTR1           | 2,857110344  | 1,930732138  | 0,926378206 |  |
| 1568978_s_at | C11orf21        | -0,496991414 | -1,423348341 | 0,926356928 |  |
| 228493_at    | LOC100506992    | -0,496991414 | -1,423348341 | 0,926356928 |  |
| 229378_at    | STOX1           | -0,496991414 | -1,423348341 | 0,926356928 |  |
| 230790_x_at  | -               | -0,496991414 | -1,423348341 | 0,926356928 |  |
| 1565628_at   | -               | -1,964176657 | -2,89013181  | 0,925955154 |  |
| 205991_s_at  | PRRX1           | -0,986356909 | -1,912089812 | 0,925732903 |  |
| 244823_at    | LOC100129034    | -0,986356909 | -1,912089812 | 0,925732903 |  |
| 217267_s_at  | RAB7A           | -2,311268652 | -3,236070201 | 0,924801549 |  |
| 212499_s_at  | FCF1 /// MAPK11 | 4,697063183  | 3,7726819    | 0,924381282 |  |
| 213087_s_at  | EEF1D           | 2,247975581  | 1,324440845  | 0,923534736 |  |
| 219930_at    | KLF8            | 0,30867765   | -0,614371577 | 0,923049226 |  |
| 205786_s_at  | ITGAM           | -1,240169874 | -2,162639771 | 0,922469897 |  |
| 220237_at    | ATG3            | -1,240169874 | -2,162639771 | 0,922469897 |  |
| 228631_s_at  | ZNF688          | -1,240169874 | -2,162639771 | 0,922469897 |  |
| 1567591_at   | -               | 0,503742507  | -0,41858459  | 0,922327097 |  |
| 219042_at    | LZTS1           | -0,741668563 | -1,663414495 | 0,921745932 |  |
| 240094_at    | -               | -0,299034815 | -1,220210588 | 0,921175773 |  |
| 241710_at    | LOC728819       | 0,384950573  | -0,536087151 | 0,921037724 |  |
| 232197_x_at  | ARSB            | 0,841135803  | -0,079522948 | 0,920658751 |  |
| 228412_at    | LOC643072       | -0,234278768 | -1,154897679 | 0,920618911 |  |
| 231388_at    | -               | -0,234278768 | -1,154897679 | 0,920618911 |  |
| 1562915_at   | -               | -0,089689931 | -1,010192375 | 0,920502444 |  |
| 1555262_a_at | MAGI1           | -0,57445847  | -1,494668682 | 0,920210211 |  |
| 243044_at    | -               | -0,57445847  | -1,494668682 | 0,920210211 |  |
| 240421_x_at  | SAV1            | 0,57058931   | -0,34958478  | 0,920174091 |  |
| 237853_x_at  | KRTAP10-12      | 0,661985843  | -0,258114234 | 0,920100076 |  |
| 235095_at    | CCDC64B         | -0,622910612 | -1,541908042 | 0,91899743  |  |
| 206233_at    | B4GALT6         | 1,556829052  | 0,638150376  | 0,918678675 |  |
| 214668_at    | SPRYD7          | 0,351548291  | -0,566887459 | 0,91843575  |  |
| 206117_at    | TPM1            | 0,152582607  | -0,765504029 | 0,918086636 |  |
| 203294_s_at  | LMAN1           | 1,64218396   | 0,724100169  | 0,918083791 |  |
| 234813_at    | TMEM108         | -0,033456564 | -0,950686014 | 0,91722945  |  |
| 223984_s_at  | NUPL1           | 0,945567441  | 0,028364014  | 0,917203427 |  |
| 222170_at    | -               | -0,196756757 | -1,112851844 | 0,916095087 |  |
| 235264_at    | HCFC2           | -0,196756757 | -1,112851844 | 0,916095087 |  |
| 211822_s_at  | NLRP1           | -0,946847173 | -1,862647763 | 0,915800589 |  |



|              |                  |              |              |             |  |
|--------------|------------------|--------------|--------------|-------------|--|
| 222076_at    | HBEGF            | -0,946847173 | -1,862647763 | 0,915800589 |  |
| 223731_at    | MYCBPAP          | -0,946847173 | -1,862647763 | 0,915800589 |  |
| 231166_at    | GPR155           | 0,496120222  | -0,41858459  | 0,914704812 |  |
| 1558755_x_at | ZNF763           | 1,58584542   | 0,67181667   | 0,91402875  |  |
| 1554182_at   | TRIM73 /// TRIM7 | -1,047650486 | -1,961547147 | 0,913896662 |  |
| 1558825_s_at | LOC100653178 /   | -1,047650486 | -1,961547147 | 0,913896662 |  |
| 208464_at    | GRIA4            | -1,047650486 | -1,961547147 | 0,913896662 |  |
| 222053_at    | TAF6L            | -1,047650486 | -1,961547147 | 0,913896662 |  |
| 233204_at    | -                | -1,047650486 | -1,961547147 | 0,913896662 |  |
| 243721_at    | C18orf61         | -1,047650486 | -1,961547147 | 0,913896662 |  |
| 201163_s_at  | IGFBP7           | 2,003776245  | 1,090553537  | 0,913222708 |  |
| 220520_s_at  | NUP62CL          | -1,173767127 | -2,086984744 | 0,913217617 |  |
| 204915_s_at  | SOX11            | -1,543331864 | -2,456406426 | 0,913074562 |  |
| 1569569_x_at | -                | -1,591296941 | -2,503677622 | 0,912380681 |  |
| 240775_at    | -                | -1,591296941 | -2,503677622 | 0,912380681 |  |
| 241749_at    | MURC             | -1,591296941 | -2,503677622 | 0,912380681 |  |
| 1554726_at   | ZNF655           | 0,715481152  | -0,19610998  | 0,911591132 |  |
| 238768_at    | C2orf68          | 0,715481152  | -0,19610998  | 0,911591132 |  |
| 234906_at    | -                | -0,512251684 | -1,423348341 | 0,911096657 |  |
| 238814_at    | SLC35C2          | -0,512251684 | -1,423348341 | 0,911096657 |  |
| 242329_at    | CREB5 /// LOC40  | -0,512251684 | -1,423348341 | 0,911096657 |  |
| 1566518_at   | -                | -1,424023738 | -2,335104118 | 0,91108038  |  |
| 217651_at    | -                | -1,424023738 | -2,335104118 | 0,91108038  |  |
| 237327_at    | APH1A            | -1,424023738 | -2,335104118 | 0,91108038  |  |
| 240817_at    | -                | -1,424023738 | -2,335104118 | 0,91108038  |  |
| 1566580_at   | -                | -0,352951799 | -1,264005341 | 0,911053542 |  |
| 207444_at    | SLC22A13         | -0,352951799 | -1,264005341 | 0,911053542 |  |
| 214907_at    | CEACAM21         | -0,352951799 | -1,264005341 | 0,911053542 |  |
| 219898_at    | GPR85            | -0,352951799 | -1,264005341 | 0,911053542 |  |
| 239990_at    | -                | -0,467091869 | -1,377419394 | 0,910327525 |  |
| 213839_at    | CLMN             | -1,937711681 | -2,847001814 | 0,909290133 |  |
| 241251_at    | -                | -1,937711681 | -2,847001814 | 0,909290133 |  |
| 208279_s_at  | CDRT1            | -0,423248115 | -1,332017329 | 0,908769214 |  |
| 1569925_at   | LOC100507386     | -0,706943342 | -1,615132408 | 0,908189066 |  |
| 237762_at    | -                | -0,706943342 | -1,615132408 | 0,908189066 |  |
| 241350_at    | FBXL22           | -0,706943342 | -1,615132408 | 0,908189066 |  |
| 209031_at    | CADM1            | -1,71423189  | -2,621331989 | 0,9071001   |  |
| 235368_at    | ADAMTS5          | -1,71423189  | -2,621331989 | 0,9071001   |  |
| 235616_at    | TSHZ2            | -1,71423189  | -2,621331989 | 0,9071001   |  |
| 1562610_at   | -                | -1,131062212 | -2,037551727 | 0,906489514 |  |
| 203841_x_at  | MAPRE3           | -1,131062212 | -2,037551727 | 0,906489514 |  |
| 232891_at    | SIRPD            | -1,131062212 | -2,037551727 | 0,906489514 |  |
| 234255_at    | -                | -1,131062212 | -2,037551727 | 0,906489514 |  |
| 1557371_a_at | LOC158376        | -0,83191556  | -1,738067356 | 0,906151796 |  |
| 222145_at    | -                | -0,83191556  | -1,738067356 | 0,906151796 |  |
| 244069_at    | -                | -0,83191556  | -1,738067356 | 0,906151796 |  |
| 230509_at    | SNX22            | 0,934330293  | 0,028364014  | 0,905966278 |  |
| 1557350_at   | G3BP1            | -0,59053611  | -1,494668682 | 0,904132571 |  |
| 216465_at    | -                | -0,59053611  | -1,494668682 | 0,904132571 |  |
| 220027_s_at  | RASIP1           | -0,59053611  | -1,494668682 | 0,904132571 |  |
| 1563458_at   | PARVA            | -0,759588698 | -1,663414495 | 0,903825797 |  |
| 220709_at    | ZNF556           | -0,759588698 | -1,663414495 | 0,903825797 |  |
| 227944_at    | PTPN3            | -0,759588698 | -1,663414495 | 0,903825797 |  |
| 242586_at    | FSD1L            | -0,759588698 | -1,663414495 | 0,903825797 |  |
| 1554836_at   | USP36            | -1,308181863 | -2,211750327 | 0,903568464 |  |
| 241582_at    | -                | -1,308181863 | -2,211750327 | 0,903568464 |  |

|              |                 |              |              |             |  |
|--------------|-----------------|--------------|--------------|-------------|--|
| 213436_at    | CNR1            | 0,44160593   | -0,461594427 | 0,903200356 |  |
| 219439_at    | C1GALT1         | 2,637386731  | 1,73441697   | 0,902969761 |  |
| 221406_s_at  | MSH5 /// MSH5-S | 0,083054335  | -0,819238336 | 0,902292671 |  |
| 1556678_a_at | -               | -0,148196756 | -1,050406615 | 0,902209859 |  |
| 204273_at    | EDNRB           | -0,148196756 | -1,050406615 | 0,902209859 |  |
| 205693_at    | TNNT3           | -0,148196756 | -1,050406615 | 0,902209859 |  |
| 234052_at    | -               | -0,148196756 | -1,050406615 | 0,902209859 |  |
| 235731_at    | AIPL1           | -0,148196756 | -1,050406615 | 0,902209859 |  |
| 235180_at    | STYX            | 0,57782909   | -0,322870281 | 0,900699372 |  |
| 228944_at    | -               | 0,480753764  | -0,41858459  | 0,899338353 |  |
| 1556350_a_at | EIF4A2          | -2,138804305 | -3,037500868 | 0,898696563 |  |
| 1565861_at   | -               | -2,138804305 | -3,037500868 | 0,898696563 |  |
| 203844_at    | VHL             | -2,138804305 | -3,037500868 | 0,898696563 |  |
| 219780_at    | ZNF771          | -2,138804305 | -3,037500868 | 0,898696563 |  |
| 235976_at    | SLITRK6         | -2,138804305 | -3,037500868 | 0,898696563 |  |
| 1553918_at   | LINC00479       | -0,888496123 | -1,787089803 | 0,898593681 |  |
| 218247_s_at  | MEX3C           | 3,270743649  | 2,372786857  | 0,897956792 |  |
| 215187_at    | FLJ11292        | -2,504600601 | -3,402185466 | 0,897584865 |  |
| 232287_at    | PGBD3           | -0,112808516 | -1,010192375 | 0,897383859 |  |
| 241936_x_at  | -               | -0,112808516 | -1,010192375 | 0,897383859 |  |
| 1558333_at   | C22orf15        | -0,366776884 | -1,264005341 | 0,897228457 |  |
| 1570445_a_at | LOC643201       | -0,366776884 | -1,264005341 | 0,897228457 |  |
| 208650_s_at  | CD24            | -0,366776884 | -1,264005341 | 0,897228457 |  |
| 227486_at    | NT5E            | -0,366776884 | -1,264005341 | 0,897228457 |  |
| 221916_at    | NEFL            | -1,838812296 | -2,735862426 | 0,897050129 |  |
| 241175_at    | -               | -1,838812296 | -2,735862426 | 0,897050129 |  |
| 222896_at    | TMEM38A         | 0,359971644  | -0,536087151 | 0,896058795 |  |
| 1559524_at   | -               | -0,259832361 | -1,154897679 | 0,895065317 |  |
| 216882_s_at  | NEBL            | -0,055687482 | -0,950686014 | 0,894998533 |  |
| 1568915_at   | -               | -0,325749314 | -1,220210588 | 0,894461274 |  |
| 244696_at    | -               | -0,325749314 | -1,220210588 | 0,894461274 |  |
| 242312_x_at  | -               | 0,503742507  | -0,39061235  | 0,894354857 |  |
| 1555251_a_at | OTOF            | -0,43775896  | -1,332017329 | 0,894258369 |  |
| 1557666_s_at | AK8             | 0,57058931   | -0,322870281 | 0,893459591 |  |
| 228925_at    | ADAM1           | 0,57058931   | -0,322870281 | 0,893459591 |  |
| 1553900_s_at | LOC100287541 /  | 0,072842263  | -0,819238336 | 0,892080599 |  |
| 1557100_s_at | HECTD1          | 0,072842263  | -0,819238336 | 0,892080599 |  |
| 1565928_at   | -               | 0,072842263  | -0,819238336 | 0,892080599 |  |
| 211768_at    | LAT2            | 0,072842263  | -0,819238336 | 0,892080599 |  |
| 1562921_at   | -               | -1,888254346 | -2,780313924 | 0,892059579 |  |
| 202581_at    | HSPA1A /// HSPA | 5,025974392  | 4,13442882   | 0,891545572 |  |
| 210414_at    | FLRT1           | -0,221656139 | -1,112851844 | 0,891195705 |  |
| 221978_at    | HLA-F           | -0,221656139 | -1,112851844 | 0,891195705 |  |
| 232406_at    | -               | -0,221656139 | -1,112851844 | 0,891195705 |  |
| 228270_at    | ZNF853          | 0,541261317  | -0,34958478  | 0,890846097 |  |
| 230544_at    | RPS6KA4         | -1,518072576 | -2,408705138 | 0,890632562 |  |
| 236354_at    | -               | -1,518072576 | -2,408705138 | 0,890632562 |  |
| 1558790_s_at | ZNF252P-AS1     | -1,196375121 | -2,086984744 | 0,890609622 |  |
| 223827_at    | TNFRSF19        | -1,196375121 | -2,086984744 | 0,890609622 |  |
| 230096_at    | -               | -1,196375121 | -2,086984744 | 0,890609622 |  |
| 230780_at    | LOC730091       | -0,022466681 | -0,912331589 | 0,889864908 |  |
| 202792_s_at  | PPP6R2          | 0,209623097  | -0,679763839 | 0,889386937 |  |
| 232702_at    | RABGAP1L        | 0,209623097  | -0,679763839 | 0,889386937 |  |
| 236622_at    | PIGM            | 0,209623097  | -0,679763839 | 0,889386937 |  |
| 1569190_at   | SCLT1           | 0,917308734  | 0,028364014  | 0,88894472  |  |
| 220991_s_at  | RNF32           | 0,273439642  | -0,614371577 | 0,887811219 |  |

|              |                 |              |              |             |  |
|--------------|-----------------|--------------|--------------|-------------|--|
| 227024_s_at  | MRPL55          | 0,273439642  | -0,614371577 | 0,887811219 |  |
| 1555894_s_at | MTSS1L          | -0,85085127  | -1,738067356 | 0,887216086 |  |
| 1556656_at   | -               | -0,85085127  | -1,738067356 | 0,887216086 |  |
| 229280_s_at  | LINC00340       | -0,85085127  | -1,738067356 | 0,887216086 |  |
| 239016_at    | -               | -0,85085127  | -1,738067356 | 0,887216086 |  |
| 1560384_a_at | LOC100506387    | -1,399512875 | -2,286583451 | 0,887070575 |  |
| 218330_s_at  | NAV2            | -1,399512875 | -2,286583451 | 0,887070575 |  |
| 244222_at    | -               | 0,03125738   | -0,855751026 | 0,887008406 |  |
| 1557542_at   | -               | -1,688127507 | -2,575129729 | 0,887002222 |  |
| 1560358_at   | -               | -1,688127507 | -2,575129729 | 0,887002222 |  |
| 204931_at    | TCF21           | -1,688127507 | -2,575129729 | 0,887002222 |  |
| 207273_at    | -               | -1,688127507 | -2,575129729 | 0,887002222 |  |
| 207918_s_at  | TSPY1 /// TSPY1 | -1,688127507 | -2,575129729 | 0,887002222 |  |
| 230233_at    | -               | -1,688127507 | -2,575129729 | 0,887002222 |  |
| 242950_x_at  | -               | -1,688127507 | -2,575129729 | 0,887002222 |  |
| 1562853_x_at | -               | 0,496120222  | -0,39061235  | 0,886732572 |  |
| 1559214_at   | -               | -0,655928373 | -1,541908042 | 0,885979669 |  |
| 233495_at    | EXOSC3          | -0,655928373 | -1,541908042 | 0,885979669 |  |
| 1554122_a_at | HSD17B12        | -1,026571149 | -1,912089812 | 0,885518663 |  |
| 240376_s_at  | -               | -1,026571149 | -1,912089812 | 0,885518663 |  |
| 241137_at    | DPCR1           | -1,026571149 | -1,912089812 | 0,885518663 |  |
| 1567222_x_at | ELOVL5          | 0,46522187   | -0,41858459  | 0,88380646  |  |
| 238155_at    | -               | 0,46522187   | -0,41858459  | 0,88380646  |  |
| 235303_at    | TRMT10B         | -1,964176657 | -2,847001814 | 0,882825158 |  |
| 241255_at    | -               | -1,964176657 | -2,847001814 | 0,882825158 |  |
| 208009_s_at  | ARHGEF16        | 0,661985843  | -0,220592223 | 0,882578066 |  |
| 220603_s_at  | MCTP2           | 1,011212064  | 0,128747141  | 0,882464923 |  |
| 228464_at    | MIR3685         | 0,888485433  | 0,007421914  | 0,88106352  |  |
| 213579_s_at  | EP300           | 1,274448124  | 0,393761504  | 0,88068662  |  |
| 208049_s_at  | TACR1           | -0,496991414 | -1,377419394 | 0,88042798  |  |
| 1556227_at   | VCPIP1          | -0,543051993 | -1,423348341 | 0,880296348 |  |
| 221303_at    | PCDHB1          | -0,543051993 | -1,423348341 | 0,880296348 |  |
| 227339_at    | RGMB            | -0,543051993 | -1,423348341 | 0,880296348 |  |
| 232561_at    | ZNF771          | -0,543051993 | -1,423348341 | 0,880296348 |  |
| 236897_at    | -               | -0,543051993 | -1,423348341 | 0,880296348 |  |
| 242992_at    | ZNF551          | 0,20027154   | -0,679763839 | 0,880035379 |  |
| 1556155_at   | -               | -0,033456564 | -0,912331589 | 0,878875025 |  |
| 1565669_at   | -               | -0,033456564 | -0,912331589 | 0,878875025 |  |
| 1570397_x_at | FAM66C          | -1,812418401 | -2,690860744 | 0,878442343 |  |
| 1556984_at   | -               | -0,172274514 | -1,050406615 | 0,878132101 |  |
| 237712_at    | LOC100507562    | -0,172274514 | -1,050406615 | 0,878132101 |  |
| 1562413_at   | LINC00167       | -1,2845686   | -2,162639771 | 0,878071171 |  |
| 1562458_at   | UBE2W           | -1,2845686   | -2,162639771 | 0,878071171 |  |
| 1565777_at   | -               | -1,2845686   | -2,162639771 | 0,878071171 |  |
| 1566499_at   | -               | -1,2845686   | -2,162639771 | 0,878071171 |  |
| 222886_at    | NSUN3           | -1,2845686   | -2,162639771 | 0,878071171 |  |
| 230896_at    | BEND4           | 2,611163891  | 1,73441697   | 0,876746921 |  |
| 226380_at    | PTPN21          | 0,020670649  | -0,855751026 | 0,876421676 |  |
| 231976_at    | LINS            | 0,020670649  | -0,855751026 | 0,876421676 |  |
| 1563750_at   | -               | -2,01371626  | -2,89013181  | 0,87641555  |  |
| 207029_at    | KITLG           | -2,01371626  | -2,89013181  | 0,87641555  |  |
| 236792_at    | CFL1            | -2,01371626  | -2,89013181  | 0,87641555  |  |
| 1554972_at   | -               | -0,986356909 | -1,862647763 | 0,876290854 |  |
| 1564749_at   | LOC100289045    | -0,986356909 | -1,862647763 | 0,876290854 |  |
| 1569004_at   | LOC100505812    | -0,986356909 | -1,862647763 | 0,876290854 |  |
| 207224_s_at  | SIGLEC7         | -0,986356909 | -1,862647763 | 0,876290854 |  |



|              |                 |              |              |             |  |
|--------------|-----------------|--------------|--------------|-------------|--|
| 210413_x_at  | SERPINB3 /// SE | -0,986356909 | -1,862647763 | 0,876290854 |  |
| 217659_at    | -               | -0,986356909 | -1,862647763 | 0,876290854 |  |
| 239513_at    | C22orf45        | -0,986356909 | -1,862647763 | 0,876290854 |  |
| 240045_at    | -               | -0,986356909 | -1,862647763 | 0,876290854 |  |
| 206466_at    | ACSBG1          | -2,262747984 | -3,138626879 | 0,875878895 |  |
| 235127_at    | PMP2            | -2,262747984 | -3,138626879 | 0,875878895 |  |
| 228000_at    | ADC             | 0,384950573  | -0,490927335 | 0,875877909 |  |
| 232447_at    | -               | 0,882651021  | 0,007421914  | 0,875229107 |  |
| 221596_s_at  | RBM48           | 2,344516784  | 1,469325098  | 0,875191686 |  |
| 223131_s_at  | TRIM8           | 0,228146222  | -0,646746079 | 0,8748923   |  |
| 1552950_at   | C15orf26        | -0,136301282 | -1,010192375 | 0,873891093 |  |
| 234048_s_at  | EPG5            | -0,741668563 | -1,615132408 | 0,873463845 |  |
| 242496_at    | ART4            | -0,741668563 | -1,615132408 | 0,873463845 |  |
| 243684_at    | -               | -0,741668563 | -1,615132408 | 0,873463845 |  |
| 1569953_at   | -               | -1,089016378 | -1,961547147 | 0,87253077  |  |
| 235760_at    | NSD1            | -1,089016378 | -1,961547147 | 0,87253077  |  |
| 240947_at    | ANO6            | -1,089016378 | -1,961547147 | 0,87253077  |  |
| 1563507_at   | -               | -0,622910612 | -1,494668682 | 0,871758069 |  |
| 1566814_at   | FGF22           | -0,622910612 | -1,494668682 | 0,871758069 |  |
| 223499_at    | C1QTNF5 /// MF  | 0,052199481  | -0,819238336 | 0,871437817 |  |
| 238397_at    | -               | 0,052199481  | -0,819238336 | 0,871437817 |  |
| 209101_at    | CTGF            | 1,326951551  | 0,456918297  | 0,870033253 |  |
| 227132_at    | ZNF706          | 0,928678725  | 0,059218869  | 0,869459856 |  |
| 207698_at    | C6orf123        | -0,394749123 | -1,264005341 | 0,869256217 |  |
| 237089_at    | -               | -0,394749123 | -1,264005341 | 0,869256217 |  |
| 244370_at    | KIAA2022        | -0,394749123 | -1,264005341 | 0,869256217 |  |
| 227014_at    | ASPHD2          | -0,285837228 | -1,154897679 | 0,86906045  |  |
| 242399_at    | -               | -0,285837228 | -1,154897679 | 0,86906045  |  |
| 222898_s_at  | DLL3            | -0,67289328  | -1,541908042 | 0,869014762 |  |
| 224399_at    | PDCD1LG2        | -0,67289328  | -1,541908042 | 0,869014762 |  |
| 239839_at    | ZNF555          | -0,67289328  | -1,541908042 | 0,869014762 |  |
| 210189_at    | HSPA1L          | 0,648296226  | -0,220592223 | 0,868888449 |  |
| 213462_at    | NPAS2           | -0,79540287  | -1,663414495 | 0,868011625 |  |
| 205557_at    | BPI             | -0,352951799 | -1,220210588 | 0,867258789 |  |
| 205714_s_at  | ZMYND10         | -0,352951799 | -1,220210588 | 0,867258789 |  |
| 1564344_at   | ATP9B           | -1,543331864 | -2,408705138 | 0,865373273 |  |
| 209672_s_at  | MIOS            | -1,543331864 | -2,408705138 | 0,865373273 |  |
| 215323_at    | LUZP2           | -1,543331864 | -2,408705138 | 0,865373273 |  |
| 1554895_a_at | RHBDL2          | -0,512251684 | -1,377419394 | 0,86516771  |  |
| 1566721_at   | SVEP1           | -0,512251684 | -1,377419394 | 0,86516771  |  |
| 202507_s_at  | SNAP25          | -0,512251684 | -1,377419394 | 0,86516771  |  |
| 213777_s_at  | -               | -0,512251684 | -1,377419394 | 0,86516771  |  |
| 232797_at    | -               | -0,512251684 | -1,377419394 | 0,86516771  |  |
| 1553142_at   | LACC1           | -1,591296941 | -2,456406426 | 0,865109485 |  |
| 1554765_a_at | LINC00301       | -1,591296941 | -2,456406426 | 0,865109485 |  |
| 1558602_a_at | LSAMP-AS3       | -1,591296941 | -2,456406426 | 0,865109485 |  |
| 214632_at    | NRP2            | -1,591296941 | -2,456406426 | 0,865109485 |  |
| 231491_at    | LINC00113       | -1,591296941 | -2,456406426 | 0,865109485 |  |
| 234760_at    | -               | -1,591296941 | -2,456406426 | 0,865109485 |  |
| 1555314_at   | WDR19           | -2,089474779 | -2,954576755 | 0,865101976 |  |
| 202966_at    | CAPN6           | -2,089474779 | -2,954576755 | 0,865101976 |  |
| 241853_at    | -               | -2,089474779 | -2,954576755 | 0,865101976 |  |
| 229317_at    | KPNA5           | 1,865674241  | 1,000684521  | 0,86498972  |  |
| 215562_at    | TTC39A          | -0,467091869 | -1,332017329 | 0,86492546  |  |
| 214190_x_at  | GGA2            | 1,114389003  | 0,249604176  | 0,864784828 |  |
| 1564838_a_at | LOC151760       | -1,047650486 | -1,912089812 | 0,864439326 |  |

|              |                |              |              |             |  |
|--------------|----------------|--------------|--------------|-------------|--|
| 1553523_at   | NLRP14         | -1,470833215 | -2,335104118 | 0,864270902 |  |
| 1569104_a_at | -              | -1,470833215 | -2,335104118 | 0,864270902 |  |
| 205925_s_at  | RAB3B          | -1,639579028 | -2,503677622 | 0,864098594 |  |
| 208155_x_at  | GAGE1 /// GAGE | -1,639579028 | -2,503677622 | 0,864098594 |  |
| 236164_at    | FLJ10038       | 0,133056859  | -0,730778808 | 0,863835667 |  |
| 205867_at    | PTPN11         | -1,173767127 | -2,037551727 | 0,8637846   |  |
| 235807_at    | -              | -1,173767127 | -2,037551727 | 0,8637846   |  |
| 238992_at    | POLI           | -1,173767127 | -2,037551727 | 0,8637846   |  |
| 240655_at    | -              | -1,173767127 | -2,037551727 | 0,8637846   |  |
| 241424_at    | ELAVL4         | -1,173767127 | -2,037551727 | 0,8637846   |  |
| 216715_at    | -              | 0,87091093   | 0,007421914  | 0,863489016 |  |
| 1552521_a_at | TMEM74         | -1,424023738 | -2,286583451 | 0,862559712 |  |
| 1554214_at   | -              | -1,424023738 | -2,286583451 | 0,862559712 |  |
| 1561389_at   | -              | -1,424023738 | -2,286583451 | 0,862559712 |  |
| 214105_at    | SOCS3          | -1,424023738 | -2,286583451 | 0,862559712 |  |
| 215174_at    | FMO6P          | -1,424023738 | -2,286583451 | 0,862559712 |  |
| 216662_at    | MYO7B          | -1,424023738 | -2,286583451 | 0,862559712 |  |
| 223981_at    | NIN            | -1,424023738 | -2,286583451 | 0,862559712 |  |
| 222117_s_at  | ADCK2          | -0,148196756 | -1,010192375 | 0,861995619 |  |
| 235564_at    | ZNF117         | -0,148196756 | -1,010192375 | 0,861995619 |  |
| 210234_at    | GRM4           | 0,57782909   | -0,283667828 | 0,861496918 |  |
| 1553074_at   | ASB11          | -1,71423189  | -2,575129729 | 0,860897839 |  |
| 206864_s_at  | HRK            | -1,71423189  | -2,575129729 | 0,860897839 |  |
| 234095_at    | -              | -1,71423189  | -2,575129729 | 0,860897839 |  |
| 240354_at    | C12orf54       | -1,71423189  | -2,575129729 | 0,860897839 |  |
| 219964_at    | ST7L           | 0,246434561  | -0,614371577 | 0,860806138 |  |
| 210745_at    | ONECUT1        | -0,926850548 | -1,787089803 | 0,860239255 |  |
| 231414_at    | -              | -0,926850548 | -1,787089803 | 0,860239255 |  |
| 1566086_at   | -              | -1,353583928 | -2,211750327 | 0,858166399 |  |
| 1567358_at   | NAV2           | -1,353583928 | -2,211750327 | 0,858166399 |  |
| 203724_s_at  | RUFY3          | -1,353583928 | -2,211750327 | 0,858166399 |  |
| 239126_at    | CIRBP-AS1      | -1,763254337 | -2,621331989 | 0,858077652 |  |
| 242189_at    | -              | -1,763254337 | -2,621331989 | 0,858077652 |  |
| 243930_x_at  | -              | -1,763254337 | -2,621331989 | 0,858077652 |  |
| 1554233_at   | C1QTNF9        | -2,138804305 | -2,996335703 | 0,857531398 |  |
| 1559991_s_at | -              | -0,299034815 | -1,154897679 | 0,855862864 |  |
| 216047_x_at  | SEZ6L          | -0,299034815 | -1,154897679 | 0,855862864 |  |
| 238443_at    | TFAM           | -0,299034815 | -1,154897679 | 0,855862864 |  |
| 1552696_at   | NIPA1          | -0,759588698 | -1,615132408 | 0,85554371  |  |
| 1570511_at   | ARHGEF10L      | -0,759588698 | -1,615132408 | 0,85554371  |  |
| 205920_at    | SLC6A6         | -0,759588698 | -1,615132408 | 0,85554371  |  |
| 215176_x_at  | LOC642838      | -0,759588698 | -1,615132408 | 0,85554371  |  |
| 225590_at    | SH3RF1         | -0,759588698 | -1,615132408 | 0,85554371  |  |
| 1554212_s_at | KCNS2          | -0,00073712  | -0,855751026 | 0,855013906 |  |
| 210511_s_at  | INHBA          | -1,308181863 | -2,162639771 | 0,854457908 |  |
| 216986_s_at  | IRF4           | -1,308181863 | -2,162639771 | 0,854457908 |  |
| 220031_at    | OTUD7B         | -1,308181863 | -2,162639771 | 0,854457908 |  |
| 229225_at    | NRP2           | -1,308181863 | -2,162639771 | 0,854457908 |  |
| 237843_at    | -              | -1,308181863 | -2,162639771 | 0,854457908 |  |
| 1569487_at   | -              | 0,123193849  | -0,730778808 | 0,853972657 |  |
| 204732_s_at  | TRIM23         | 0,123193849  | -0,730778808 | 0,853972657 |  |
| 217279_x_at  | MMP14          | 0,123193849  | -0,730778808 | 0,853972657 |  |
| 230856_at    | -              | -0,196756757 | -1,050406615 | 0,853649858 |  |
| 1565823_at   | -              | -0,366776884 | -1,220210588 | 0,853433704 |  |
| 208191_x_at  | PSG4           | -0,366776884 | -1,220210588 | 0,853433704 |  |
| 1554966_a_at | FILIP1L        | -0,259832361 | -1,112851844 | 0,853019483 |  |

|              |                 |              |              |             |  |
|--------------|-----------------|--------------|--------------|-------------|--|
| 219739_at    | RNF186          | -0,259832361 | -1,112851844 | 0,853019483 |  |
| 220210_at    | CHRNA10         | -0,259832361 | -1,112851844 | 0,853019483 |  |
| 1557523_at   | ATP6AP1L /// FL | -1,838812296 | -2,690860744 | 0,852048448 |  |
| 1562348_at   | LOC400680       | -1,838812296 | -2,690860744 | 0,852048448 |  |
| 1562633_at   | RMST            | -1,838812296 | -2,690860744 | 0,852048448 |  |
| 212806_at    | PRUNE2          | -1,838812296 | -2,690860744 | 0,852048448 |  |
| 224401_s_at  | FCRL4           | -1,838812296 | -2,690860744 | 0,852048448 |  |
| 231204_at    | C4orf21         | -1,838812296 | -2,690860744 | 0,852048448 |  |
| 243328_at    | -               | -1,838812296 | -2,690860744 | 0,852048448 |  |
| 1566980_at   | -               | 0,171847695  | -0,679763839 | 0,851611535 |  |
| 242293_at    | ING3            | 1,655931423  | 0,805216064  | 0,850715359 |  |
| 1562657_a_at | C10orf90        | 0,03125738   | -0,819238336 | 0,850495716 |  |
| 1555938_x_at | VIM             | 0,592200562  | -0,258114234 | 0,850314795 |  |
| 1553890_s_at | NTN5            | -0,888496123 | -1,738067356 | 0,849571233 |  |
| 210202_s_at  | BIN1            | -0,888496123 | -1,738067356 | 0,849571233 |  |
| 233301_at    | OXCT2           | -0,888496123 | -1,738067356 | 0,849571233 |  |
| 221974_at    | IPW /// LOC1005 | 3,062018438  | 2,212749286  | 0,849269152 |  |
| 1561834_a_at | -               | -0,57445847  | -1,423348341 | 0,848889871 |  |
| 1562044_at   | -               | -0,57445847  | -1,423348341 | 0,848889871 |  |
| 237835_at    | -               | -0,57445847  | -1,423348341 | 0,848889871 |  |
| 222558_at    | RPRD1A          | 1,305306849  | 0,456918297  | 0,848388552 |  |
| 243661_at    | ZNF273          | 0,457392764  | -0,39061235  | 0,848005114 |  |
| 220648_at    | ADARB2          | -1,888254346 | -2,735862426 | 0,84760808  |  |
| 225983_s_at  | VWA1            | -1,888254346 | -2,735862426 | 0,84760808  |  |
| 241063_at    | -               | -1,888254346 | -2,735862426 | 0,84760808  |  |
| 1566402_at   | SNORA68         | 0,20027154   | -0,646746079 | 0,847017618 |  |
| 1557126_a_at | PLD1            | -1,240169874 | -2,086984744 | 0,846814869 |  |
| 224147_at    | PARPBP          | -1,240169874 | -2,086984744 | 0,846814869 |  |
| 227677_at    | JAK3            | -1,240169874 | -2,086984744 | 0,846814869 |  |
| 233956_at    | -               | -1,240169874 | -2,086984744 | 0,846814869 |  |
| 237279_at    | -               | -1,240169874 | -2,086984744 | 0,846814869 |  |
| 240070_at    | TIGIT           | -1,240169874 | -2,086984744 | 0,846814869 |  |
| 203059_s_at  | PAPSS2          | 0,496120222  | -0,34958478  | 0,845705002 |  |
| 229804_x_at  | CBWD1 /// CBWI  | 2,943717636  | 2,098562556  | 0,84515508  |  |
| 226014_at    | EIF3F           | 0,30867765   | -0,536087151 | 0,844764801 |  |
| 221994_at    | PDLIM5          | 0,425644434  | -0,41858459  | 0,844229023 |  |
| 224223_s_at  | PDE11A          | -1,937711681 | -2,780313924 | 0,842602243 |  |
| 240423_at    | LOC441204       | -1,937711681 | -2,780313924 | 0,842602243 |  |
| 1555695_a_at | CLRN1           | 0,228146222  | -0,614371577 | 0,842517798 |  |
| 232563_at    | ZNF684          | 0,228146222  | -0,614371577 | 0,842517798 |  |
| 210177_at    | TRIM15          | 0,351548291  | -0,490927335 | 0,842475626 |  |
| 241036_at    | -               | 0,351548291  | -0,490927335 | 0,842475626 |  |
| 225494_at    | -               | 2,882181479  | 2,040470494  | 0,841710984 |  |
| 1559254_at   | LINC00162       | -1,196375121 | -2,037551727 | 0,841176605 |  |
| 1564598_a_at | VWA3B           | -1,196375121 | -2,037551727 | 0,841176605 |  |
| 238593_at    | C11orf80        | -1,196375121 | -2,037551727 | 0,841176605 |  |
| 206512_at    | SRP19 /// ZRSR1 | -0,423248115 | -1,264005341 | 0,840757225 |  |
| 238421_at    | RC3H2           | -0,423248115 | -1,264005341 | 0,840757225 |  |
| 213740_s_at  | LOC100130348    | -0,946847173 | -1,787089803 | 0,84024263  |  |
| 215193_x_at  | HLA-DRB1 /// HL | -0,946847173 | -1,787089803 | 0,84024263  |  |
| 220365_at    | ALLC            | -0,946847173 | -1,787089803 | 0,84024263  |  |
| 234511_at    | ANKRD60         | -0,946847173 | -1,787089803 | 0,84024263  |  |
| 236235_at    | -               | -0,946847173 | -1,787089803 | 0,84024263  |  |
| 242484_at    | TTC9B           | -0,946847173 | -1,787089803 | 0,84024263  |  |
| 205212_s_at  | ACAP1           | 0,020670649  | -0,819238336 | 0,839908986 |  |
| 1553178_a_at | SSTR3           | 0,555999837  | -0,283667828 | 0,839667664 |  |



|              |                |              |              |             |  |
|--------------|----------------|--------------|--------------|-------------|--|
| 228207_at    | LOC100499489   | -0,655928373 | -1,494668682 | 0,838740309 |  |
| 230090_at    | GDNF           | -0,655928373 | -1,494668682 | 0,838740309 |  |
| 230877_at    | IGHD           | -0,655928373 | -1,494668682 | 0,838740309 |  |
| 232895_s_at  | -              | -0,655928373 | -1,494668682 | 0,838740309 |  |
| 242094_at    | -              | 1,496984567  | 0,658444279  | 0,838540288 |  |
| 230649_at    | C1orf86        | 0,072842263  | -0,765504029 | 0,838346292 |  |
| 204051_s_at  | SFRP4          | -0,172274514 | -1,010192375 | 0,837917861 |  |
| 60084_at     | CYLD           | -1,725201958 | -2,563029977 | 0,837828019 |  |
| 210359_at    | MTSS1          | 0,641402394  | -0,19610998  | 0,837512374 |  |
| 238348_x_at  | -              | -2,262747984 | -3,098858316 | 0,836110332 |  |
| 1552932_at   | NLRP6          | -1,026571149 | -1,862647763 | 0,836076614 |  |
| 211407_at    | NDUFB7         | -1,026571149 | -1,862647763 | 0,836076614 |  |
| 241847_at    | -              | -1,026571149 | -1,862647763 | 0,836076614 |  |
| 1563513_at   | SYTL4          | -0,496991414 | -1,332017329 | 0,835025915 |  |
| 214861_at    | KDM4C          | -0,706943342 | -1,541908042 | 0,8349647   |  |
| 227888_at    | RRBP1          | -0,706943342 | -1,541908042 | 0,8349647   |  |
| 232511_at    | -              | -0,706943342 | -1,541908042 | 0,8349647   |  |
| 220853_at    | GTDC1          | -0,543051993 | -1,377419394 | 0,834367401 |  |
| 238571_at    | HOXA13         | -0,543051993 | -1,377419394 | 0,834367401 |  |
| 205848_at    | GAS2           | -0,078265071 | -0,912331589 | 0,834066517 |  |
| 236448_at    | UNC5A          | -0,078265071 | -0,912331589 | 0,834066517 |  |
| 241125_at    | -              | -0,078265071 | -0,912331589 | 0,834066517 |  |
| 234109_x_at  | ONECUT3        | 0,103263601  | -0,730778808 | 0,834042409 |  |
| 236704_at    | LOC100505971   | 0,103263601  | -0,730778808 | 0,834042409 |  |
| 1565577_s_at | -              | 0,841135803  | 0,007421914  | 0,833713889 |  |
| 226289_at    | CAPRIN1        | 1,638726528  | 0,805216064  | 0,833510464 |  |
| 205157_s_at  | JUP /// KRT17  | -2,01371626  | -2,847001814 | 0,833285554 |  |
| 1559835_at   | -              | -0,59053611  | -1,423348341 | 0,832812231 |  |
| 211657_at    | CEACAM6        | -0,59053611  | -1,423348341 | 0,832812231 |  |
| 217498_at    | -              | -0,59053611  | -1,423348341 | 0,832812231 |  |
| 218901_at    | PLSCR4         | -0,59053611  | -1,423348341 | 0,832812231 |  |
| 1558522_at   | -              | 0,152582607  | -0,679763839 | 0,832346446 |  |
| 205409_at    | FOSL2          | 0,152582607  | -0,679763839 | 0,832346446 |  |
| 222710_at    | AMIGO3 /// GMP | 0,44160593   | -0,39061235  | 0,83221828  |  |
| 1558807_at   | ATAD2B         | -0,83191556  | -1,663414495 | 0,831498935 |  |
| 1565918_a_at | -              | -0,83191556  | -1,663414495 | 0,831498935 |  |
| 201438_at    | COL6A3         | -0,83191556  | -1,663414495 | 0,831498935 |  |
| 208733_at    | RAB2A          | -0,83191556  | -1,663414495 | 0,831498935 |  |
| 213767_at    | KSR1           | -0,83191556  | -1,663414495 | 0,831498935 |  |
| 230801_at    | RPRD1B         | -0,83191556  | -1,663414495 | 0,831498935 |  |
| 243977_at    | LOC541472      | -0,83191556  | -1,663414495 | 0,831498935 |  |
| 1570420_at   | STXBP2         | 1,434549838  | 0,603679647  | 0,830870191 |  |
| 225717_at    | KIAA1715       | 1,224581536  | 0,393761504  | 0,830820031 |  |
| 233191_at    | RUFY2          | 0,859074518  | 0,028364014  | 0,830710504 |  |
| 227175_at    | MCL1           | 0,728550685  | -0,102100538 | 0,830651223 |  |
| 1556113_at   | DKFZp451A211   | -1,131062212 | -1,961547147 | 0,830484935 |  |
| 1559171_at   | MGC57346       | -1,131062212 | -1,961547147 | 0,830484935 |  |
| 232595_at    | -              | -1,131062212 | -1,961547147 | 0,830484935 |  |
| 210458_s_at  | TANK           | 0,480753764  | -0,34958478  | 0,830338544 |  |
| 204602_at    | DKK1           | 2,2992452    | 1,469325098  | 0,829920103 |  |
| 204008_at    | DNAL4          | 1,454352496  | 0,624460759  | 0,829891737 |  |
| 224018_s_at  | SCD5           | -0,325749314 | -1,154897679 | 0,829148365 |  |
| 238045_at    | TMEM65         | -0,221656139 | -1,050406615 | 0,828750476 |  |
| 235452_at    | -              | 0,181384709  | -0,646746079 | 0,828130788 |  |
| 234645_at    | -              | -2,311268652 | -3,138626879 | 0,827358227 |  |
| 229455_at    | -              | 0,291166226  | -0,536087151 | 0,827253376 |  |

|              |                |              |              |             |  |
|--------------|----------------|--------------|--------------|-------------|--|
| 1565641_at   | C16orf45       | -0,285837228 | -1,112851844 | 0,827014616 |  |
| 242753_x_at  | AP1AR          | -0,285837228 | -1,112851844 | 0,827014616 |  |
| 243851_at    | AURKAPS1 /// R | -0,285837228 | -1,112851844 | 0,827014616 |  |
| 1556256_a_at | LOC100505908   | -2,063149277 | -2,89013181  | 0,826982533 |  |
| 1552283_s_at | ZDHC11         | -0,43775896  | -1,264005341 | 0,82624638  |  |
| 1553686_at   | C18orf25       | -0,43775896  | -1,264005341 | 0,82624638  |  |
| 205362_s_at  | PFDN4          | 1,04816921   | 0,222599095  | 0,825570116 |  |
| 1566039_a_at | -              | -0,394749123 | -1,220210588 | 0,825461464 |  |
| 202908_at    | WFS1           | -0,394749123 | -1,220210588 | 0,825461464 |  |
| 219517_at    | ELL3           | -0,394749123 | -1,220210588 | 0,825461464 |  |
| 227311_at    | SNX25          | -0,394749123 | -1,220210588 | 0,825461464 |  |
| 239680_at    | WDR76          | 0,541261317  | -0,283667828 | 0,824929144 |  |
| 223656_s_at  | TMEM234        | 1,177702228  | 0,352836757  | 0,82486547  |  |
| 220945_x_at  | MANSC1         | 0,882651021  | 0,059218869  | 0,823432152 |  |
| 1552349_a_at | PRSS33         | -1,089016378 | -1,912089812 | 0,823073434 |  |
| 1559102_at   | -              | -1,089016378 | -1,912089812 | 0,823073434 |  |
| 205838_at    | GYPA           | -1,089016378 | -1,912089812 | 0,823073434 |  |
| 214824_at    | -              | -1,089016378 | -1,912089812 | 0,823073434 |  |
| 232319_at    | -              | -1,089016378 | -1,912089812 | 0,823073434 |  |
| 206188_at    | ZNF623         | 2,014487247  | 1,191491281  | 0,822995966 |  |
| 242947_at    | -              | -0,089689931 | -0,912331589 | 0,822641658 |  |
| 1563655_at   | TNNT2          | 0,255492549  | -0,566887459 | 0,822380009 |  |
| 236239_at    | XPNPEP1        | 0,255492549  | -0,566887459 | 0,822380009 |  |
| 214425_at    | AMBP           | -0,033456564 | -0,855751026 | 0,822294462 |  |
| 244379_at    | -              | -0,033456564 | -0,855751026 | 0,822294462 |  |
| 1552862_at   | RUSC1-AS1      | -0,67289328  | -1,494668682 | 0,821775402 |  |
| 210834_s_at  | PTGER3         | -0,67289328  | -1,494668682 | 0,821775402 |  |
| 214523_at    | CEBPE          | -0,67289328  | -1,494668682 | 0,821775402 |  |
| 215850_s_at  | NDUFA5         | -0,67289328  | -1,494668682 | 0,821775402 |  |
| 239626_x_at  | TM9SF3         | -0,67289328  | -1,494668682 | 0,821775402 |  |
| 218352_at    | RCBTB1         | 2,979690938  | 2,159161028  | 0,820529911 |  |
| 1559031_at   | EXOSC10        | -0,512251684 | -1,332017329 | 0,819765645 |  |
| 238521_at    | FGF12          | -0,512251684 | -1,332017329 | 0,819765645 |  |
| 1561472_at   | LOC728805      | -0,79540287  | -1,615132408 | 0,819729538 |  |
| 213103_at    | STARD13        | -0,79540287  | -1,615132408 | 0,819729538 |  |
| 234124_at    | -              | -0,79540287  | -1,615132408 | 0,819729538 |  |
| 230306_at    | VPS26B         | 1,129248302  | 0,310717132  | 0,81853117  |  |
| 241982_at    | -              | -0,00073712  | -0,819238336 | 0,818501216 |  |
| 201324_at    | EMP1           | 0,533835206  | -0,283667828 | 0,817503034 |  |
| 1561673_at   | -              | -1,591296941 | -2,408705138 | 0,817408196 |  |
| 1567250_at   | OR10A3         | -1,591296941 | -2,408705138 | 0,817408196 |  |
| 204596_s_at  | STC1           | -1,591296941 | -2,408705138 | 0,817408196 |  |
| 211451_s_at  | KCNJ4          | -1,591296941 | -2,408705138 | 0,817408196 |  |
| 229557_at    | MEG3           | -1,591296941 | -2,408705138 | 0,817408196 |  |
| 230261_at    | ST8SIA4        | -1,591296941 | -2,408705138 | 0,817408196 |  |
| 229441_at    | PRSS23         | 1,897847661  | 1,080561626  | 0,817286035 |  |
| 1564306_at   | -              | -1,518072576 | -2,335104118 | 0,817031542 |  |
| 222313_at    | -              | -1,518072576 | -2,335104118 | 0,817031542 |  |
| 231080_at    | CDAN1          | -1,518072576 | -2,335104118 | 0,817031542 |  |
| 239209_at    | -              | -1,518072576 | -2,335104118 | 0,817031542 |  |
| 244790_at    | MTCP1          | -1,518072576 | -2,335104118 | 0,817031542 |  |
| 1558549_s_at | VNN1           | -1,639579028 | -2,456406426 | 0,816827398 |  |
| 1559313_at   | -              | -1,639579028 | -2,456406426 | 0,816827398 |  |
| 1570229_at   | -              | -1,639579028 | -2,456406426 | 0,816827398 |  |
| 216193_at    | -              | -1,639579028 | -2,456406426 | 0,816827398 |  |
| 228462_at    | IRX2           | -1,639579028 | -2,456406426 | 0,816827398 |  |

|              |                 |              |              |             |  |
|--------------|-----------------|--------------|--------------|-------------|--|
| 238685_at    | STXBP5-AS1      | -1,639579028 | -2,456406426 | 0,816827398 |  |
| 37512_at     | HSD17B6         | 0,376672238  | -0,439929237 | 0,816601475 |  |
| 238728_at    | -               | -0,234278768 | -1,050406615 | 0,816127847 |  |
| 243837_x_at  | -               | -0,234278768 | -1,050406615 | 0,816127847 |  |
| 1558680_s_at | PDE1A           | -1,470833215 | -2,286583451 | 0,815750235 |  |
| 1562942_at   | -               | -1,470833215 | -2,286583451 | 0,815750235 |  |
| 213352_at    | TMCC1           | -1,470833215 | -2,286583451 | 0,815750235 |  |
| 214947_at    | FAM105A         | -1,470833215 | -2,286583451 | 0,815750235 |  |
| 216195_at    | ANK2            | -1,470833215 | -2,286583451 | 0,815750235 |  |
| 229218_at    | COL1A2          | -1,470833215 | -2,286583451 | 0,815750235 |  |
| 233036_at    | -               | -1,470833215 | -2,286583451 | 0,815750235 |  |
| 241671_x_at  | LINC00340       | -1,470833215 | -2,286583451 | 0,815750235 |  |
| 235218_x_at  | THAP6           | 0,97328325   | 0,157549243  | 0,815734007 |  |
| 240351_at    | -               | -1,688127507 | -2,503677622 | 0,815550116 |  |
| 1558754_at   | ZNF763          | -1,047650486 | -1,862647763 | 0,814997277 |  |
| 214079_at    | DHRS2           | -1,047650486 | -1,862647763 | 0,814997277 |  |
| 213984_at    | PDS5A           | 0,46522187   | -0,34958478  | 0,814806651 |  |
| 206931_at    | ZNF141          | -0,136301282 | -0,950686014 | 0,814384732 |  |
| 216315_x_at  | -               | -0,136301282 | -0,950686014 | 0,814384732 |  |
| 204653_at    | TFAP2A          | 0,083054335  | -0,730778808 | 0,813833143 |  |
| 1562463_at   | -               | -0,299034815 | -1,112851844 | 0,813817029 |  |
| 225867_at    | VASN            | -0,196756757 | -1,010192375 | 0,813435618 |  |
| 243860_at    | -               | -0,196756757 | -1,010192375 | 0,813435618 |  |
| 228975_at    | SP6             | 0,246434561  | -0,566887459 | 0,81332202  |  |
| 234360_at    | -               | 0,246434561  | -0,566887459 | 0,81332202  |  |
| 238963_at    | -               | 0,246434561  | -0,566887459 | 0,81332202  |  |
| 219208_at    | FBXO11          | 1,269985355  | 0,456918297  | 0,813067057 |  |
| 201117_s_at  | CPE             | 0,592200562  | -0,220592223 | 0,812792785 |  |
| 1557924_s_at | ALPL            | -0,85085127  | -1,663414495 | 0,812563225 |  |
| 235015_at    | ZDHHC9          | -0,85085127  | -1,663414495 | 0,812563225 |  |
| 1562589_at   | -               | -1,399512875 | -2,211750327 | 0,812237452 |  |
| 208359_s_at  | KCNJ4           | -1,399512875 | -2,211750327 | 0,812237452 |  |
| 211441_x_at  | CYP3A43         | -1,399512875 | -2,211750327 | 0,812237452 |  |
| 223826_s_at  | KIAA1432        | -1,399512875 | -2,211750327 | 0,812237452 |  |
| 236746_at    | GALNT1          | -1,399512875 | -2,211750327 | 0,812237452 |  |
| 242444_at    | C1QTNF6         | -1,399512875 | -2,211750327 | 0,812237452 |  |
| 1562771_at   | -               | -1,763254337 | -2,575129729 | 0,811875392 |  |
| 214712_at    | SNX29P2         | -1,763254337 | -2,575129729 | 0,811875392 |  |
| 238408_at    | -               | -1,763254337 | -2,575129729 | 0,811875392 |  |
| 241662_x_at  | -               | -1,763254337 | -2,575129729 | 0,811875392 |  |
| 243128_at    | ZNF175          | -1,763254337 | -2,575129729 | 0,811875392 |  |
| 212210_at    | INTS1           | -0,926850548 | -1,738067356 | 0,811216808 |  |
| 215436_at    | HSDL2           | -0,926850548 | -1,738067356 | 0,811216808 |  |
| 217518_at    | MYOF            | -0,926850548 | -1,738067356 | 0,811216808 |  |
| 229534_at    | ACOT4           | -0,926850548 | -1,738067356 | 0,811216808 |  |
| 61732_r_at   | IFT74           | -0,333022385 | -1,143195856 | 0,810173472 |  |
| 231852_at    | ERI1            | 1,434549838  | 0,624460759  | 0,810089078 |  |
| 227090_at    | PHF21A          | 0,613492853  | -0,19610998  | 0,809602833 |  |
| 1570328_s_at | C20orf62        | 0,273439642  | -0,536087151 | 0,809526793 |  |
| 217663_at    | ZNF234          | 0,273439642  | -0,536087151 | 0,809526793 |  |
| 228300_at    | CCDC103 /// FAN | 0,273439642  | -0,536087151 | 0,809526793 |  |
| 1560172_at   | INTS10          | -1,353583928 | -2,162639771 | 0,809055843 |  |
| 206448_at    | ZNF365          | -1,353583928 | -2,162639771 | 0,809055843 |  |
| 207725_at    | POU4F2          | -1,353583928 | -2,162639771 | 0,809055843 |  |
| 229506_at    | PPM1L           | -1,353583928 | -2,162639771 | 0,809055843 |  |
| 232401_at    | KCNS2           | -1,353583928 | -2,162639771 | 0,809055843 |  |

|             |                 |              |              |             |  |
|-------------|-----------------|--------------|--------------|-------------|--|
| 235469_at   | FAM133B /// FAM | -1,353583928 | -2,162639771 | 0,809055843 |  |
| 240777_at   | SYNE2           | -1,353583928 | -2,162639771 | 0,809055843 |  |
| 223550_s_at | CA10            | -1,812418401 | -2,621331989 | 0,808913588 |  |
| 224313_at   | AASDHPPT        | -1,812418401 | -2,621331989 | 0,808913588 |  |
| 234745_at   | -               | -1,812418401 | -2,621331989 | 0,808913588 |  |
| 240261_at   | TOM1L1          | -1,812418401 | -2,621331989 | 0,808913588 |  |
| 240404_at   | -               | -1,812418401 | -2,621331989 | 0,808913588 |  |
| 216348_at   | -               | 3,849821959  | 3,042049843  | 0,807772115 |  |
| 213601_at   | ARHGAP19 /// Sl | 0,457392764  | -0,34958478  | 0,806977545 |  |
| 229417_at   | -               | 0,457392764  | -0,34958478  | 0,806977545 |  |
| 212587_s_at | PTPRC           | 1,805273023  | 1,000684521  | 0,804588502 |  |
| 200796_s_at | MCL1            | 2,365585359  | 1,562009954  | 0,803575405 |  |
| 1405_i_at   | CCL5            | -0,768285559 | -1,57175725  | 0,803471691 |  |
| 1564379_at  | -               | -0,57445847  | -1,377419394 | 0,802960924 |  |
| 1570351_at  | ADAMTS6         | -0,57445847  | -1,377419394 | 0,802960924 |  |
| 211544_s_at | GHRHR           | -0,57445847  | -1,377419394 | 0,802960924 |  |
| 222187_x_at | G3BP1           | 1,139070151  | 0,336136178  | 0,802933973 |  |
| 1552789_at  | SEC62           | -1,888254346 | -2,690860744 | 0,802606398 |  |
| 1563978_at  | LOC728690       | -1,888254346 | -2,690860744 | 0,802606398 |  |
| 238117_at   | PPOX            | -1,888254346 | -2,690860744 | 0,802606398 |  |
| 1558841_at  | CWC27           | -1,2845686   | -2,086984744 | 0,802416143 |  |
| 215466_at   | -               | -1,2845686   | -2,086984744 | 0,802416143 |  |
| 229386_at   | ID4             | -1,2845686   | -2,086984744 | 0,802416143 |  |
| 231175_at   | BEND6           | -1,2845686   | -2,086984744 | 0,802416143 |  |
| 237373_at   | RAB20           | -1,2845686   | -2,086984744 | 0,802416143 |  |
| 244369_at   | C21orf59        | -1,2845686   | -2,086984744 | 0,802416143 |  |
| 226675_s_at | LOC100507645 /  | 3,352164686  | 2,549796788  | 0,802367898 |  |
| 212827_at   | IGHM            | -0,352951799 | -1,154897679 | 0,80194588  |  |
| 235446_at   | -               | -0,352951799 | -1,154897679 | 0,80194588  |  |
| 238556_at   | -               | -0,352951799 | -1,154897679 | 0,80194588  |  |
| 205753_at   | CRP             | -0,986356909 | -1,787089803 | 0,800732894 |  |
| 208468_at   | SOX21           | -0,986356909 | -1,787089803 | 0,800732894 |  |
| 1565320_at  | RBM3AP          | -2,089474779 | -2,89013181  | 0,800657031 |  |
| 232119_at   | SYNPO2          | -2,089474779 | -2,89013181  | 0,800657031 |  |
| 239148_at   | MARVELD3        | -2,089474779 | -2,89013181  | 0,800657031 |  |
| 204299_at   | SRSF10          | 3,984619786  | 3,184136378  | 0,800483409 |  |
| 234730_s_at | RIPK4           | -0,622910612 | -1,423348341 | 0,800437729 |  |
| 235031_at   | -               | -0,741668563 | -1,541908042 | 0,800239479 |  |
| 235790_at   | CTAGE5          | -0,741668563 | -1,541908042 | 0,800239479 |  |
| 244249_at   | -               | -0,741668563 | -1,541908042 | 0,800239479 |  |
| 238933_at   | IRS1            | -0,112808516 | -0,912331589 | 0,799523072 |  |
| 217465_at   | NCKAP1          | 0,541261317  | -0,258114234 | 0,79937555  |  |
| 232091_s_at | ZDHHC24         | 0,152582607  | -0,646746079 | 0,799328685 |  |
| 235304_at   | LOC100507486    | 2,491678455  | 1,692388143  | 0,799290313 |  |
| 1554010_at  | NDST1           | 0,95671774   | 0,157549243  | 0,799168497 |  |
| 215226_at   | EXPH5           | -1,937711681 | -2,735862426 | 0,798150744 |  |
| 233945_at   | UGGT2           | -1,937711681 | -2,735862426 | 0,798150744 |  |
| 234131_at   | -               | -1,937711681 | -2,735862426 | 0,798150744 |  |
| 1552608_at  | WFDC11          | -1,240169874 | -2,037551727 | 0,797381852 |  |
| 221394_at   | TAAR2           | -1,240169874 | -2,037551727 | 0,797381852 |  |
| 224340_at   | -               | -1,240169874 | -2,037551727 | 0,797381852 |  |
| 229005_at   | MCTP2           | -1,240169874 | -2,037551727 | 0,797381852 |  |
| 237197_at   | -               | -1,240169874 | -2,037551727 | 0,797381852 |  |
| 207185_at   | SLC10A1         | -0,423248115 | -1,220210588 | 0,796962472 |  |
| 209815_at   | PTCH1           | -0,423248115 | -1,220210588 | 0,796962472 |  |
| 233294_at   | DENND2C         | -0,423248115 | -1,220210588 | 0,796962472 |  |



|              |                 |              |              |             |  |
|--------------|-----------------|--------------|--------------|-------------|--|
| 237421_at    | -               | -0,423248115 | -1,220210588 | 0,796962472 |  |
| 240360_at    | BRD4            | -0,423248115 | -1,220210588 | 0,796962472 |  |
| 209277_at    | TFPI2           | 5,483409962  | 4,686464402  | 0,79694556  |  |
| 220749_at    | C10orf68        | -0,467091869 | -1,264005341 | 0,796913472 |  |
| 223686_at    | TPK1            | -0,022466681 | -0,819238336 | 0,796771656 |  |
| 231259_s_at  | -               | -0,022466681 | -0,819238336 | 0,796771656 |  |
| 203507_at    | CD68            | 0,334552598  | -0,461594427 | 0,796147025 |  |
| 203784_s_at  | DDX28           | 0,334552598  | -0,461594427 | 0,796147025 |  |
| 1552467_at   | DSCR10          | 0,181384709  | -0,614371577 | 0,795756286 |  |
| 205859_at    | LY86            | 0,181384709  | -0,614371577 | 0,795756286 |  |
| 231255_at    | MPRIP           | 0,181384709  | -0,614371577 | 0,795756286 |  |
| 1561760_s_at | -               | -2,384869671 | -3,177802286 | 0,792932615 |  |
| 1562338_at   | 01.03.15        | -2,384869671 | -3,177802286 | 0,792932615 |  |
| 221211_s_at  | C21orf7         | 1,946200473  | 1,153866761  | 0,792333711 |  |
| 236769_at    | LOC158402       | 0,401366113  | -0,39061235  | 0,791978463 |  |
| 1563540_at   | -               | -1,543331864 | -2,335104118 | 0,791772253 |  |
| 210057_at    | LOC100506060 /  | -1,543331864 | -2,335104118 | 0,791772253 |  |
| 220191_at    | GKN1            | -1,543331864 | -2,335104118 | 0,791772253 |  |
| 231526_at    | -               | -1,543331864 | -2,335104118 | 0,791772253 |  |
| 237909_at    | ADAM6           | -1,543331864 | -2,335104118 | 0,791772253 |  |
| 238464_at    | ANKRD36 /// ANI | -1,543331864 | -2,335104118 | 0,791772253 |  |
| 239103_at    | -               | -1,543331864 | -2,335104118 | 0,791772253 |  |
| 1553089_a_at | WFDC2           | -0,946847173 | -1,738067356 | 0,791220183 |  |
| 1560855_at   | -               | -0,946847173 | -1,738067356 | 0,791220183 |  |
| 1569979_at   | HKR1            | -0,946847173 | -1,738067356 | 0,791220183 |  |
| 202566_s_at  | SVIL            | -0,946847173 | -1,738067356 | 0,791220183 |  |
| 209400_at    | SLC12A4         | -0,946847173 | -1,738067356 | 0,791220183 |  |
| 216549_s_at  | TBC1D22B        | -0,946847173 | -1,738067356 | 0,791220183 |  |
| 224215_s_at  | DLL1            | -0,946847173 | -1,738067356 | 0,791220183 |  |
| 225280_x_at  | ARSD            | -0,946847173 | -1,738067356 | 0,791220183 |  |
| 236665_at    | CCDC18          | -0,946847173 | -1,738067356 | 0,791220183 |  |
| 243487_at    | AFF4            | -0,946847173 | -1,738067356 | 0,791220183 |  |
| 1554346_at   | GNB5            | 0,798390451  | 0,007421914  | 0,790968537 |  |
| 1555205_at   | -               | -0,259832361 | -1,050406615 | 0,790574254 |  |
| 1559316_at   | -               | -1,71423189  | -2,503677622 | 0,789445733 |  |
| 207237_at    | KCNA3           | -1,71423189  | -2,503677622 | 0,789445733 |  |
| 231707_at    | -               | -0,543051993 | -1,332017329 | 0,788965336 |  |
| 233336_at    | -               | -0,543051993 | -1,332017329 | 0,788965336 |  |
| 212924_s_at  | LSM4            | -0,221656139 | -1,010192375 | 0,788536237 |  |
| 204296_at    | DCTN1           | -0,366776884 | -1,154897679 | 0,788120795 |  |
| 207900_at    | CCL17           | -0,366776884 | -1,154897679 | 0,788120795 |  |
| 218273_s_at  | PDP1            | -0,366776884 | -1,154897679 | 0,788120795 |  |
| 226595_at    | SNX21           | -0,366776884 | -1,154897679 | 0,788120795 |  |
| 228886_at    | LRRC27          | -0,366776884 | -1,154897679 | 0,788120795 |  |
| 230430_at    | ENTPD2          | -0,366776884 | -1,154897679 | 0,788120795 |  |
| 243368_at    | -               | -0,366776884 | -1,154897679 | 0,788120795 |  |
| 217461_x_at  | -               | 1,305306849  | 0,51742585   | 0,787880999 |  |
| 1553003_at   | PKHD1           | -1,173767127 | -1,961547147 | 0,787780021 |  |
| 222924_at    | LOC100287789 /  | -1,173767127 | -1,961547147 | 0,787780021 |  |
| 234896_at    | -               | -1,173767127 | -1,961547147 | 0,787780021 |  |
| 243260_x_at  | XKR6            | -1,173767127 | -1,961547147 | 0,787780021 |  |
| 243758_at    | CCDC37          | -1,173767127 | -1,961547147 | 0,787780021 |  |
| 1557190_at   | -               | -1,424023738 | -2,211750327 | 0,787726589 |  |
| 222079_at    | ERG             | -1,424023738 | -2,211750327 | 0,787726589 |  |
| 239927_at    | LOC100506259    | -1,424023738 | -2,211750327 | 0,787726589 |  |
| 1556182_x_at | ANKRD65         | -0,706943342 | -1,494668682 | 0,78772534  |  |

|              |                  |              |              |             |  |
|--------------|------------------|--------------|--------------|-------------|--|
| 209373_at    | MALL             | -0,706943342 | -1,494668682 | 0,78772534  |  |
| 234024_at    | CBLN4            | -0,706943342 | -1,494668682 | 0,78772534  |  |
| 235157_at    | -                | -0,706943342 | -1,494668682 | 0,78772534  |  |
| 242710_at    | -                | -2,311268652 | -3,098858316 | 0,787589665 |  |
| 221480_at    | HNRNPD           | 3,628024221  | 2,840694075  | 0,787330146 |  |
| 1559332_at   | -                | -0,59053611  | -1,377419394 | 0,786883284 |  |
| 204686_at    | IRS1             | -0,59053611  | -1,377419394 | 0,786883284 |  |
| 214245_at    | RPS14            | -0,59053611  | -1,377419394 | 0,786883284 |  |
| 233412_x_at  | -                | -0,59053611  | -1,377419394 | 0,786883284 |  |
| 235216_at    | ESCO1            | -0,59053611  | -1,377419394 | 0,786883284 |  |
| 239563_at    | -                | -0,59053611  | -1,377419394 | 0,786883284 |  |
| 241037_at    | -                | -0,59053611  | -1,377419394 | 0,786883284 |  |
| 242109_at    | -                | -0,59053611  | -1,377419394 | 0,786883284 |  |
| 214628_at    | NHLH1            | 0,171847695  | -0,614371577 | 0,786219272 |  |
| 217326_x_at  | IL23A /// TRBV19 | 0,171847695  | -0,614371577 | 0,786219272 |  |
| 237731_at    | LOC154092        | 0,171847695  | -0,614371577 | 0,786219272 |  |
| 236213_at    | -                | 0,020670649  | -0,765504029 | 0,786174678 |  |
| 238520_at    | TRERF1           | 0,020670649  | -0,765504029 | 0,786174678 |  |
| 242194_at    | -                | 0,020670649  | -0,765504029 | 0,786174678 |  |
| 239289_x_at  | FAN1             | 1,163336153  | 0,377530647  | 0,785805507 |  |
| 244294_at    | GTF2H5           | -0,033456564 | -0,819238336 | 0,785781772 |  |
| 203299_s_at  | AP1S2            | 5,352607629  | 4,567200037  | 0,785407592 |  |
| 206047_at    | GNB3             | 0,792179257  | 0,007421914  | 0,784757343 |  |
| 235520_at    | ZNF280C          | 0,682279745  | -0,102100538 | 0,784380283 |  |
| 219512_at    | DSN1             | 2,589836943  | 1,805902329  | 0,783934614 |  |
| 212637_s_at  | WWP1             | 1,937784532  | 1,153866761  | 0,78391777  |  |
| 1552438_a_at | ANKAR            | -2,063149277 | -2,847001814 | 0,783852537 |  |
| 217534_at    | FAM49B           | -2,063149277 | -2,847001814 | 0,783852537 |  |
| 1553874_a_at | ZSCAN10          | -0,83191556  | -1,615132408 | 0,783216848 |  |
| 1569523_a_at | -                | -0,83191556  | -1,615132408 | 0,783216848 |  |
| 217572_at    | -                | -0,83191556  | -1,615132408 | 0,783216848 |  |
| 230145_at    | DUS3L            | -0,83191556  | -1,615132408 | 0,783216848 |  |
| 235776_x_at  | LINC00475        | -0,83191556  | -1,615132408 | 0,783216848 |  |
| 236015_at    | -                | -0,83191556  | -1,615132408 | 0,783216848 |  |
| 240230_s_at  | AGAP9            | -0,83191556  | -1,615132408 | 0,783216848 |  |
| 1555785_a_at | XRN1             | 0,052199481  | -0,730778808 | 0,782978288 |  |
| 206596_s_at  | NRL              | 0,246434561  | -0,536087151 | 0,782521712 |  |
| 1553446_at   | C6orf183         | -1,838812296 | -2,621331989 | 0,782519693 |  |
| 1557677_a_at | TRIML1           | -1,838812296 | -2,621331989 | 0,782519693 |  |
| 232939_at    | -                | -1,838812296 | -2,621331989 | 0,782519693 |  |
| 243143_at    | FAM24A           | -1,838812296 | -2,621331989 | 0,782519693 |  |
| 204075_s_at  | CEP104           | -0,43775896  | -1,220210588 | 0,782451627 |  |
| 219518_s_at  | ELL3             | -0,43775896  | -1,220210588 | 0,782451627 |  |
| 220226_at    | TRPM8            | -0,43775896  | -1,220210588 | 0,782451627 |  |
| 224514_x_at  | IL17RC           | -0,43775896  | -1,220210588 | 0,782451627 |  |
| 237075_at    | LOC100506762     | -0,43775896  | -1,220210588 | 0,782451627 |  |
| 208035_at    | GRM6             | -0,759588698 | -1,541908042 | 0,782319344 |  |
| 208484_at    | HIST1H1A         | -0,759588698 | -1,541908042 | 0,782319344 |  |
| 220061_at    | ACSM5            | -0,759588698 | -1,541908042 | 0,782319344 |  |
| 1553960_at   | SNX21            | -1,131062212 | -1,912089812 | 0,781027599 |  |
| 1560550_at   | -                | -1,131062212 | -1,912089812 | 0,781027599 |  |
| 213716_s_at  | SECTM1           | -1,131062212 | -1,912089812 | 0,781027599 |  |
| 223136_at    | AIG1             | -1,131062212 | -1,912089812 | 0,781027599 |  |
| 44790_s_at   | KIAA0226L        | -1,590652973 | -2,371435322 | 0,780782349 |  |
| 219589_s_at  | TMEM143          | 0,457392764  | -0,322870281 | 0,780263046 |  |
| 209145_s_at  | CBFA2T2          | 0,133056859  | -0,646746079 | 0,779802937 |  |

|              |                |              |              |             |  |
|--------------|----------------|--------------|--------------|-------------|--|
| 216665_s_at  | TTY2 /// TTY2  | -2,359436556 | -3,138626879 | 0,779190323 |  |
| 238497_at    | TMEM136        | 0,317354302  | -0,461594427 | 0,778948728 |  |
| 1553818_x_at | LOC100653171 / | -1,308181863 | -2,086984744 | 0,778802881 |  |
| 204884_s_at  | HUS1           | -1,308181863 | -2,086984744 | 0,778802881 |  |
| 207235_s_at  | GRM5           | -1,308181863 | -2,086984744 | 0,778802881 |  |
| 209955_s_at  | FAP            | -1,308181863 | -2,086984744 | 0,778802881 |  |
| 237058_x_at  | SLC6A13        | -1,308181863 | -2,086984744 | 0,778802881 |  |
| 241359_at    | TLCD2          | -1,308181863 | -2,086984744 | 0,778802881 |  |
| 224618_at    | PTBP3          | 2,259277178  | 1,480766833  | 0,778510345 |  |
| 1562487_at   | -              | -0,172274514 | -0,950686014 | 0,778411501 |  |
| 208373_s_at  | P2RY6          | -0,078265071 | -0,855751026 | 0,777485955 |  |
| 211867_s_at  | PCDHA10        | -0,078265071 | -0,855751026 | 0,777485955 |  |
| 227283_at    | EFR3B          | -0,078265071 | -0,855751026 | 0,777485955 |  |
| 230519_at    | FAM124A        | -0,078265071 | -0,855751026 | 0,777485955 |  |
| 202695_s_at  | STK17A         | 0,934330293  | 0,157549243  | 0,77678105  |  |
| 1565836_at   | -              | -0,234278768 | -1,010192375 | 0,775913608 |  |
| 231023_at    | CARS2          | -0,234278768 | -1,010192375 | 0,775913608 |  |
| 236046_at    | FLJ44896       | -0,234278768 | -1,010192375 | 0,775913608 |  |
| 1557599_a_at | -              | -2,262747984 | -3,037500868 | 0,774752884 |  |
| 234205_at    | -              | -2,262747984 | -3,037500868 | 0,774752884 |  |
| 216218_s_at  | PLCL2          | 0,57782909   | -0,19610998  | 0,773939071 |  |
| 1564931_at   | -              | -1,089016378 | -1,862647763 | 0,773631385 |  |
| 205894_at    | ARSE           | -1,089016378 | -1,862647763 | 0,773631385 |  |
| 222833_at    | LPCAT2         | -1,089016378 | -1,862647763 | 0,773631385 |  |
| 230705_at    | SLC2A5         | -1,089016378 | -1,862647763 | 0,773631385 |  |
| 204500_s_at  | AGTPBP1        | 1,649074067  | 0,876248481  | 0,772825586 |  |
| 1554264_at   | CKAP2          | -1,964176657 | -2,735862426 | 0,771685769 |  |
| 203477_at    | COL15A1        | -1,964176657 | -2,735862426 | 0,771685769 |  |
| 216146_at    | -              | -1,964176657 | -2,735862426 | 0,771685769 |  |
| 227644_at    | RIMS4          | -1,964176657 | -2,735862426 | 0,771685769 |  |
| 244831_at    | -              | -1,964176657 | -2,735862426 | 0,771685769 |  |
| 205862_at    | GREB1          | 1,442503549  | 0,67181667   | 0,770686879 |  |
| 213206_at    | GOSR2          | 0,351548291  | -0,41858459  | 0,770132881 |  |
| 235300_x_at  | RCHY1          | 0,798390451  | 0,028364014  | 0,770026437 |  |
| 244052_at    | CBR4           | 1,799091453  | 1,029536893  | 0,76955456  |  |
| 222974_at    | IL22           | -2,504600601 | -3,273861381 | 0,76926078  |  |
| 207739_s_at  | GAGE1 /// GAGE | -1,639579028 | -2,408705138 | 0,769126109 |  |
| 228938_at    | MBP            | -1,639579028 | -2,408705138 | 0,769126109 |  |
| 1557314_at   | DPY19L2P3      | -1,518072576 | -2,286583451 | 0,768510875 |  |
| 1561607_at   | -              | -1,518072576 | -2,286583451 | 0,768510875 |  |
| 214270_s_at  | MAPRE3         | -1,518072576 | -2,286583451 | 0,768510875 |  |
| 241263_at    | -              | -1,518072576 | -2,286583451 | 0,768510875 |  |
| 1552779_a_at | SLC44A5        | -1,688127507 | -2,456406426 | 0,768278919 |  |
| 215617_at    | SPATS2L        | -1,688127507 | -2,456406426 | 0,768278919 |  |
| 241018_at    | TMEM59         | -1,688127507 | -2,456406426 | 0,768278919 |  |
| 233254_x_at  | PTEN           | 0,417596971  | -0,34958478  | 0,767181751 |  |
| 209477_at    | EMD            | 2,752227654  | 1,98530622   | 0,766921434 |  |
| 208031_s_at  | RFX2           | 0,57058931   | -0,19610998  | 0,76669929  |  |
| 1555502_at   | NPSA           | -2,187914861 | -2,954576755 | 0,766661894 |  |
| 1562938_at   | -              | -2,187914861 | -2,954576755 | 0,766661894 |  |
| 215282_at    | ANAPC13        | -2,187914861 | -2,954576755 | 0,766661894 |  |
| 219466_s_at  | APOA2          | -2,187914861 | -2,954576755 | 0,766661894 |  |
| 242571_at    | REPS2          | -2,187914861 | -2,954576755 | 0,766661894 |  |
| 206482_at    | PTK6           | -2,01371626  | -2,780313924 | 0,766597664 |  |
| 227081_at    | DNALI1         | -2,01371626  | -2,780313924 | 0,766597664 |  |
| 233565_s_at  | FKBP1A-SDCBP   | 1,119359127  | 0,352836757  | 0,76652237  |  |

|              |              |              |              |             |  |
|--------------|--------------|--------------|--------------|-------------|--|
| 1554704_at   | ATP8B3       | 1,534677255  | 0,768343791  | 0,766333465 |  |
| 226960_at    | CXCL17       | -0,089689931 | -0,855751026 | 0,766061095 |  |
| 1555347_at   | PDXDC1       | -1,196375121 | -1,961547147 | 0,765172026 |  |
| 1559871_s_at | LOC100129129 | -1,196375121 | -1,961547147 | 0,765172026 |  |
| 207217_s_at  | NOX1         | -1,196375121 | -1,961547147 | 0,765172026 |  |
| 208497_x_at  | NEUROG1      | -1,196375121 | -1,961547147 | 0,765172026 |  |
| 215495_s_at  | SAMD4A       | -1,196375121 | -1,961547147 | 0,765172026 |  |
| 220136_s_at  | CRYBA2       | -1,196375121 | -1,961547147 | 0,765172026 |  |
| 220461_at    | PCNXL2       | -1,196375121 | -1,961547147 | 0,765172026 |  |
| 226559_at    | IER5L        | -1,196375121 | -1,961547147 | 0,765172026 |  |
| 232298_at    | LOC401093    | -1,196375121 | -1,961547147 | 0,765172026 |  |
| 232781_at    | LHX4         | -1,196375121 | -1,961547147 | 0,765172026 |  |
| 235780_at    | PRKACB       | -1,196375121 | -1,961547147 | 0,765172026 |  |
| 236387_at    | LOC100129961 | -1,196375121 | -1,961547147 | 0,765172026 |  |
| 239282_at    | CCDC41       | -1,196375121 | -1,961547147 | 0,765172026 |  |
| 242076_at    | -            | -1,196375121 | -1,961547147 | 0,765172026 |  |
| 212207_at    | MED13L       | 1,90937145   | 1,144305291  | 0,765066159 |  |
| 224843_at    | SLAIN2       | -0,00073712  | -0,765504029 | 0,764766909 |  |
| 1554129_a_at | ADIG         | -0,285837228 | -1,050406615 | 0,764569387 |  |
| 1560765_a_at | -            | -0,285837228 | -1,050406615 | 0,764569387 |  |
| 230001_at    | 09.03.15     | -0,285837228 | -1,050406615 | 0,764569387 |  |
| 204210_s_at  | PCYT1A       | 0,44160593   | -0,322870281 | 0,764476211 |  |
| 216961_s_at  | RPAIN        | 0,480753764  | -0,283667828 | 0,764421591 |  |
| 206891_at    | ACTN3        | 0,273439642  | -0,490927335 | 0,764366977 |  |
| 221941_at    | PAOX         | 0,273439642  | -0,490927335 | 0,764366977 |  |
| 242590_at    | -            | 0,273439642  | -0,490927335 | 0,764366977 |  |
| 1552773_at   | CLEC4D       | -0,85085127  | -1,615132408 | 0,764281138 |  |
| 210739_x_at  | SLC4A4       | -0,85085127  | -1,615132408 | 0,764281138 |  |
| 233472_at    | TCP11L1      | -0,85085127  | -1,615132408 | 0,764281138 |  |
| 233507_at    | -            | -0,85085127  | -1,615132408 | 0,764281138 |  |
| 241066_at    | ZNF449       | -0,85085127  | -1,615132408 | 0,764281138 |  |
| 243432_at    | CHL1-AS2     | 0,228146222  | -0,536087151 | 0,764233372 |  |
| 214158_s_at  | PRDM10       | -0,148196756 | -0,912331589 | 0,764134832 |  |
| 1564539_at   | LOC647323    | -1,399512875 | -2,162639771 | 0,763126896 |  |
| 235722_at    | SYNJ2BP      | -1,399512875 | -2,162639771 | 0,763126896 |  |
| 243302_at    | -            | -1,399512875 | -2,162639771 | 0,763126896 |  |
| 204230_s_at  | SLC17A7      | 0,083054335  | -0,679763839 | 0,762818174 |  |
| 1553652_a_at | C18orf54     | -1,812418401 | -2,575129729 | 0,762711328 |  |
| 1568981_at   | -            | -1,812418401 | -2,575129729 | 0,762711328 |  |
| 242835_s_at  | LOC728730    | -1,812418401 | -2,575129729 | 0,762711328 |  |
| 243052_at    | MOB3C        | 0,03125738   | -0,730778808 | 0,762036188 |  |
| 215997_s_at  | CUL4B        | 2,305800198  | 1,543943227  | 0,76185697  |  |
| 232684_at    | ZNF503-AS1   | 0,682279745  | -0,079522948 | 0,761802694 |  |
| 207103_at    | KCND2        | -1,026571149 | -1,787089803 | 0,760518654 |  |
| 210659_at    | CMKLR1       | -1,026571149 | -1,787089803 | 0,760518654 |  |
| 226182_s_at  | WISP3        | -1,026571149 | -1,787089803 | 0,760518654 |  |
| 233220_at    | GRIN3A       | -1,026571149 | -1,787089803 | 0,760518654 |  |
| 233431_x_at  | -            | -1,026571149 | -1,787089803 | 0,760518654 |  |
| 237021_at    | LOC144486    | -1,026571149 | -1,787089803 | 0,760518654 |  |
| 238185_at    | -            | -1,026571149 | -1,787089803 | 0,760518654 |  |
| 1558181_at   | -            | -0,394749123 | -1,154897679 | 0,760148555 |  |
| 235164_at    | ZNF25        | -0,394749123 | -1,154897679 | 0,760148555 |  |
| 244299_at    | -            | -0,394749123 | -1,154897679 | 0,760148555 |  |
| 1570631_at   | -            | -0,352951799 | -1,112851844 | 0,759900045 |  |
| 235460_at    | SNX22        | -0,352951799 | -1,112851844 | 0,759900045 |  |
| 216771_at    | -            | -2,236765673 | -2,996335703 | 0,75957003  |  |



|             |              |              |              |             |  |
|-------------|--------------|--------------|--------------|-------------|--|
| 229138_at   | PARP11       | 0,962260738  | 0,204310755  | 0,757949983 |  |
| 232419_at   | TMEM132A     | 0,934330293  | 0,176436073  | 0,757894219 |  |
| 216869_at   | PDE1C        | -0,57445847  | -1,332017329 | 0,757558859 |  |
| 231909_x_at | ODF2L        | -0,57445847  | -1,332017329 | 0,757558859 |  |
| 1563898_at  | -            | -2,089474779 | -2,847001814 | 0,757527035 |  |
| 1564253_at  | LOC285766    | -2,089474779 | -2,847001814 | 0,757527035 |  |
| 215118_s_at | IGHA1        | -2,089474779 | -2,847001814 | 0,757527035 |  |
| 242161_at   | -            | -2,089474779 | -2,847001814 | 0,757527035 |  |
| 208116_s_at | MAN1A1       | 1,274448124  | 0,51742585   | 0,757022274 |  |
| 214348_at   | TACR2        | -0,622910612 | -1,377419394 | 0,754508782 |  |
| 243291_at   | -            | -0,622910612 | -1,377419394 | 0,754508782 |  |
| 226226_at   | TMEM45B      | -0,196756757 | -0,950686014 | 0,753929257 |  |
| 239881_at   | -            | -0,196756757 | -0,950686014 | 0,753929257 |  |
| 237866_at   | PID1         | -2,384869671 | -3,138626879 | 0,753757208 |  |
| 1562373_at  | -            | -1,937711681 | -2,690860744 | 0,753149063 |  |
| 1564295_at  | FLJ25917     | -1,937711681 | -2,690860744 | 0,753149063 |  |
| 1566947_at  | -            | -1,937711681 | -2,690860744 | 0,753149063 |  |
| 226765_at   | SPTBN1       | -1,937711681 | -2,690860744 | 0,753149063 |  |
| 230231_at   | FGF14        | -1,937711681 | -2,690860744 | 0,753149063 |  |
| 233023_at   | -            | -1,937711681 | -2,690860744 | 0,753149063 |  |
| 243558_at   | -            | -1,937711681 | -2,690860744 | 0,753149063 |  |
| 232407_at   | MUC17        | -0,467091869 | -1,220210588 | 0,753118719 |  |
| 240329_at   | PTP4A1       | -0,467091869 | -1,220210588 | 0,753118719 |  |
| 228945_s_at | SLC39A8      | -0,741668563 | -1,494668682 | 0,753000119 |  |
| 229224_x_at | LOC643085    | -0,741668563 | -1,494668682 | 0,753000119 |  |
| 236268_at   | SEC22C       | -0,741668563 | -1,494668682 | 0,753000119 |  |
| 240136_at   | -            | -0,741668563 | -1,494668682 | 0,753000119 |  |
| 1557252_at  | -            | -1,2845686   | -2,037551727 | 0,752983126 |  |
| 200606_at   | DSP          | -1,2845686   | -2,037551727 | 0,752983126 |  |
| 204762_s_at | GNAO1        | -1,2845686   | -2,037551727 | 0,752983126 |  |
| 223505_s_at | DNAJC27      | -1,2845686   | -2,037551727 | 0,752983126 |  |
| 226931_at   | TMTC1        | -1,2845686   | -2,037551727 | 0,752983126 |  |
| 227535_at   | C15orf24     | 0,291166226  | -0,461594427 | 0,752760652 |  |
| 89977_at    | ACSM5        | -0,945897783 | -1,698550632 | 0,752652849 |  |
| 1557613_at  | FLJ39534     | 0,072842263  | -0,679763839 | 0,752606102 |  |
| 202525_at   | PRSS8        | -0,512251684 | -1,264005341 | 0,751753656 |  |
| 220557_s_at | PACS1        | -0,512251684 | -1,264005341 | 0,751753656 |  |
| 237765_at   | SLC25A47     | -0,512251684 | -1,264005341 | 0,751753656 |  |
| 241148_at   | ACTG2        | -0,512251684 | -1,264005341 | 0,751753656 |  |
| 205732_s_at | NCOA2        | -0,986356909 | -1,738067356 | 0,751710447 |  |
| 207301_at   | EFNA5        | -0,986356909 | -1,738067356 | 0,751710447 |  |
| 208008_at   | TBC1D29      | -0,986356909 | -1,738067356 | 0,751710447 |  |
| 210744_s_at | IL5RA        | -0,986356909 | -1,738067356 | 0,751710447 |  |
| 238144_s_at | -            | -0,986356909 | -1,738067356 | 0,751710447 |  |
| 240699_at   | SEC14L3      | -0,986356909 | -1,738067356 | 0,751710447 |  |
| 244161_at   | -            | -0,986356909 | -1,738067356 | 0,751710447 |  |
| 1553156_at  | LHX4         | 0,020670649  | -0,730778808 | 0,751449457 |  |
| 219812_at   | PVRIG        | 0,020670649  | -0,730778808 | 0,751449457 |  |
| 229508_at   | U2AF2        | 0,020670649  | -0,730778808 | 0,751449457 |  |
| 237463_at   | ZFPM1        | 0,020670649  | -0,730778808 | 0,751449457 |  |
| 241501_at   | -            | 0,020670649  | -0,730778808 | 0,751449457 |  |
| 212310_at   | MIA3         | -0,299034815 | -1,050406615 | 0,7513718   |  |
| 231620_at   | LOC100507190 | -0,299034815 | -1,050406615 | 0,7513718   |  |
| 1569275_at  | -            | -2,138804305 | -2,89013181  | 0,751327505 |  |
| 210800_at   | TIMM8A       | -2,138804305 | -2,89013181  | 0,751327505 |  |
| 234826_at   | -            | -2,138804305 | -2,89013181  | 0,751327505 |  |

|              |                 |              |              |             |  |
|--------------|-----------------|--------------|--------------|-------------|--|
| 240821_at    | -               | -2,138804305 | -2,89013181  | 0,751327505 |  |
| 243478_at    | CHST2           | -2,138804305 | -2,89013181  | 0,751327505 |  |
| 1553120_at   | CLSPN           | 0,779676066  | 0,028364014  | 0,751312051 |  |
| 1568834_s_at | CCDC90B         | 0,401366113  | -0,34958478  | 0,750950893 |  |
| 218833_at    | ZAK             | 0,401366113  | -0,34958478  | 0,750950893 |  |
| 1555655_at   | OR10A4          | -0,67289328  | -1,423348341 | 0,750455062 |  |
| 215336_at    | AKAP11          | -0,67289328  | -1,423348341 | 0,750455062 |  |
| 223822_at    | SUSD4           | -0,67289328  | -1,423348341 | 0,750455062 |  |
| 234188_at    | -               | -0,67289328  | -1,423348341 | 0,750455062 |  |
| 243575_at    | MAST4           | -0,259832361 | -1,010192375 | 0,750360014 |  |
| 202903_at    | LSM5            | 1,614289682  | 0,864649967  | 0,749639714 |  |
| 204221_x_at  | GLIPR1          | 0,82905153   | 0,079428135  | 0,749623395 |  |
| 231920_s_at  | CSNK1G1         | 0,702292136  | -0,046302147 | 0,748594283 |  |
| 221578_at    | RASSF4          | 0,181384709  | -0,566887459 | 0,748272169 |  |
| 202720_at    | TES             | 1,534677255  | 0,786897721  | 0,747779534 |  |
| 227004_at    | -               | 1,534677255  | 0,786897721  | 0,747779534 |  |
| 228812_at    | -               | 1,515954005  | 0,768343791  | 0,747610215 |  |
| 1555964_at   | ARL17A /// ARL1 | -0,79540287  | -1,541908042 | 0,746505172 |  |
| 1556564_at   | HHIPL1          | -0,79540287  | -1,541908042 | 0,746505172 |  |
| 1561785_at   | MUC4            | -0,79540287  | -1,541908042 | 0,746505172 |  |
| 221724_s_at  | CLEC4A          | -0,79540287  | -1,541908042 | 0,746505172 |  |
| 234888_at    | CACHD1          | -0,79540287  | -1,541908042 | 0,746505172 |  |
| 240020_at    | -               | -0,366776884 | -1,112851844 | 0,74607496  |  |
| 1554820_at   | AGBL3           | -2,43257096  | -3,177802286 | 0,745231326 |  |
| 236175_at    | TRIM55          | -2,43257096  | -3,177802286 | 0,745231326 |  |
| 1557529_at   | C12orf51        | -1,591296941 | -2,335104118 | 0,743807176 |  |
| 208849_at    | -               | -1,591296941 | -2,335104118 | 0,743807176 |  |
| 221901_at    | KIAA1644        | -1,591296941 | -2,335104118 | 0,743807176 |  |
| 225242_s_at  | CCDC80          | -1,591296941 | -2,335104118 | 0,743807176 |  |
| 230508_at    | DKK3            | -1,591296941 | -2,335104118 | 0,743807176 |  |
| 231899_at    | ZC3H12C         | -1,591296941 | -2,335104118 | 0,743807176 |  |
| 232570_s_at  | ADAM33          | -1,591296941 | -2,335104118 | 0,743807176 |  |
| 241900_at    | -               | -1,591296941 | -2,335104118 | 0,743807176 |  |
| 214220_s_at  | ALMS1           | 2,305800198  | 1,562009954  | 0,743790244 |  |
| 228907_at    | LOC100507110    | 0,641402394  | -0,102100538 | 0,743502932 |  |
| 222626_at    | RBM26           | 1,578645857  | 0,835239052  | 0,743406804 |  |
| 1554582_a_at | METTL20         | -1,543331864 | -2,286583451 | 0,743251586 |  |
| 1566517_at   | -               | -1,543331864 | -2,286583451 | 0,743251586 |  |
| 206372_at    | MYF6            | -1,543331864 | -2,286583451 | 0,743251586 |  |
| 210133_at    | CCL11           | -1,543331864 | -2,286583451 | 0,743251586 |  |
| 214533_at    | CMA1            | -1,543331864 | -2,286583451 | 0,743251586 |  |
| 217086_at    | CHRNA3          | -1,543331864 | -2,286583451 | 0,743251586 |  |
| 225911_at    | NPNT            | -1,543331864 | -2,286583451 | 0,743251586 |  |
| 234058_at    | -               | -1,543331864 | -2,286583451 | 0,743251586 |  |
| 240216_at    | -               | -1,543331864 | -2,286583451 | 0,743251586 |  |
| 243597_at    | FANCB           | -0,022466681 | -0,765504029 | 0,743037348 |  |
| 1554203_at   | GRIK1-AS1       | -1,71423189  | -2,456406426 | 0,742174536 |  |
| 219234_x_at  | SCRN3           | -1,71423189  | -2,456406426 | 0,742174536 |  |
| 220479_at    | CPS1-IT1        | -1,71423189  | -2,456406426 | 0,742174536 |  |
| 220872_at    | PRO2964         | -1,71423189  | -2,456406426 | 0,742174536 |  |
| 244259_s_at  | -               | -1,71423189  | -2,456406426 | 0,742174536 |  |
| 202751_at    | TFIP11          | 1,446464021  | 0,704715219  | 0,741748801 |  |
| 225941_at    | EIF4E3          | -0,59053611  | -1,332017329 | 0,741481219 |  |
| 233181_at    | -               | -0,59053611  | -1,332017329 | 0,741481219 |  |
| 236054_at    | -               | -0,59053611  | -1,332017329 | 0,741481219 |  |
| 243180_at    | -               | -0,59053611  | -1,332017329 | 0,741481219 |  |

|              |            |              |              |             |  |
|--------------|------------|--------------|--------------|-------------|--|
| 243809_at    | HELQ       | -0,59053611  | -1,332017329 | 0,741481219 |  |
| 1560901_at   | -          | 0,457392764  | -0,283667828 | 0,741060592 |  |
| 224030_s_at  | FAM115A    | 0,457392764  | -0,283667828 | 0,741060592 |  |
| 217300_at    | -          | -0,078265071 | -0,819238336 | 0,740973265 |  |
| 230224_at    | ZCCHC18    | -0,078265071 | -0,819238336 | 0,740973265 |  |
| 243740_at    | -          | -0,078265071 | -0,819238336 | 0,740973265 |  |
| 1556619_at   | SHISA9     | -1,470833215 | -2,211750327 | 0,740917112 |  |
| 204797_s_at  | EML1       | -1,470833215 | -2,211750327 | 0,740917112 |  |
| 206341_at    | IL2RA      | -1,470833215 | -2,211750327 | 0,740917112 |  |
| 217048_at    | -          | -1,470833215 | -2,211750327 | 0,740917112 |  |
| 227253_at    | CP         | -1,470833215 | -2,211750327 | 0,740917112 |  |
| 229409_s_at  | -          | -1,470833215 | -2,211750327 | 0,740917112 |  |
| 230360_at    | GLDN       | -1,470833215 | -2,211750327 | 0,740917112 |  |
| 230635_at    | -          | -1,470833215 | -2,211750327 | 0,740917112 |  |
| 232533_at    | METTL8     | -1,470833215 | -2,211750327 | 0,740917112 |  |
| 239297_at    | KIAA1456   | -1,470833215 | -2,211750327 | 0,740917112 |  |
| 242529_x_at  | -          | -1,470833215 | -2,211750327 | 0,740917112 |  |
| 214917_at    | PRKAA1     | 0,417596971  | -0,322870281 | 0,740467252 |  |
| 228289_at    | BRD7       | 0,417596971  | -0,322870281 | 0,740467252 |  |
| 230986_at    | KLF8       | 0,417596971  | -0,322870281 | 0,740467252 |  |
| 209355_s_at  | PPAP2B     | -1,763254337 | -2,503677622 | 0,740423285 |  |
| 215478_at    | RIMS2      | -1,763254337 | -2,503677622 | 0,740423285 |  |
| 201269_s_at  | NUDCD3     | -0,172274514 | -0,912331589 | 0,740057075 |  |
| 213148_at    | C2orf72    | -0,172274514 | -0,912331589 | 0,740057075 |  |
| 1557257_at   | BCL10      | -1,047650486 | -1,787089803 | 0,739439318 |  |
| 1561453_at   | -          | -1,047650486 | -1,787089803 | 0,739439318 |  |
| 214021_x_at  | ITGB5      | -1,047650486 | -1,787089803 | 0,739439318 |  |
| 224389_s_at  | COL25A1    | -1,047650486 | -1,787089803 | 0,739439318 |  |
| 1568820_a_at | BEND6      | -2,359436556 | -3,098858316 | 0,73942176  |  |
| 243800_at    | NR1H4      | -2,359436556 | -3,098858316 | 0,73942176  |  |
| 207503_at    | TCP10      | 0,171847695  | -0,566887459 | 0,738735155 |  |
| 1557598_at   | -          | -1,424023738 | -2,162639771 | 0,738616033 |  |
| 216527_at    | -          | -1,424023738 | -2,162639771 | 0,738616033 |  |
| 230000_at    | RNF213     | -1,424023738 | -2,162639771 | 0,738616033 |  |
| 234509_at    | -          | -1,424023738 | -2,162639771 | 0,738616033 |  |
| 242825_at    | LPPR5      | -1,424023738 | -2,162639771 | 0,738616033 |  |
| 242943_at    | ST8SIA4    | -1,424023738 | -2,162639771 | 0,738616033 |  |
| 244836_at    | -          | -1,424023738 | -2,162639771 | 0,738616033 |  |
| 1562240_at   | PLXNA4     | -1,173767127 | -1,912089812 | 0,738322685 |  |
| 1564317_at   | -          | -1,173767127 | -1,912089812 | 0,738322685 |  |
| 206921_at    | GLE1       | -1,173767127 | -1,912089812 | 0,738322685 |  |
| 209758_s_at  | MFAP5      | -1,173767127 | -1,912089812 | 0,738322685 |  |
| 211884_s_at  | CIITA      | -1,173767127 | -1,912089812 | 0,738322685 |  |
| 238466_at    | -          | -1,173767127 | -1,912089812 | 0,738322685 |  |
| 242192_at    | -          | -1,173767127 | -1,912089812 | 0,738322685 |  |
| 230026_at    | MRPL43     | 1,292162421  | 0,553993624  | 0,738168797 |  |
| 230930_at    | LOC338620  | 0,57782909   | -0,160136748 | 0,737965839 |  |
| 205156_s_at  | ASIC1      | 0,123193849  | -0,614371577 | 0,737565426 |  |
| 1561225_at   | LOC338579  | -0,926850548 | -1,663414495 | 0,736563946 |  |
| 1561409_at   | -          | -0,926850548 | -1,663414495 | 0,736563946 |  |
| 215272_at    | OGG1       | -0,926850548 | -1,663414495 | 0,736563946 |  |
| 223597_at    | ITLN1      | -0,926850548 | -1,663414495 | 0,736563946 |  |
| 228048_at    | ZNF503-AS2 | -0,926850548 | -1,663414495 | 0,736563946 |  |
| 233987_at    | TFAP2D     | -0,926850548 | -1,663414495 | 0,736563946 |  |
| 236583_at    | GIMAP1     | -0,926850548 | -1,663414495 | 0,736563946 |  |
| 237226_at    | -          | -0,926850548 | -1,663414495 | 0,736563946 |  |

|              |                 |              |              |             |  |
|--------------|-----------------|--------------|--------------|-------------|--|
| 244217_at    | -               | -0,926850548 | -1,663414495 | 0,736563946 |  |
| 1553749_at   | FAM76B          | 2,708372067  | 1,971855016  | 0,736517051 |  |
| 202793_at    | LPCAT3          | 1,360921491  | 0,624460759  | 0,736460732 |  |
| 216984_x_at  | CKAP2 /// IGLC1 | 0,20027154   | -0,536087151 | 0,73635869  |  |
| 1552563_a_at | -               | -1,838812296 | -2,575129729 | 0,736317433 |  |
| 1559161_at   | -               | -1,838812296 | -2,575129729 | 0,736317433 |  |
| 1563860_at   | LOC400965       | -1,838812296 | -2,575129729 | 0,736317433 |  |
| 207286_at    | CEP135          | -1,838812296 | -2,575129729 | 0,736317433 |  |
| 221576_at    | LOC100653010    | -1,838812296 | -2,575129729 | 0,736317433 |  |
| 238429_at    | TMEM71          | -1,838812296 | -2,575129729 | 0,736317433 |  |
| 235864_at    | ATP6V1D         | 0,317354302  | -0,41858459  | 0,735938891 |  |
| 227802_at    | RUFY3           | 1,153678675  | 0,417770464  | 0,735908212 |  |
| 1552572_a_at | MIPOL1          | -0,759588698 | -1,494668682 | 0,735079984 |  |
| 1568847_at   | -               | -0,759588698 | -1,494668682 | 0,735079984 |  |
| 236055_at    | DQX1            | -0,759588698 | -1,494668682 | 0,735079984 |  |
| 238335_at    | DNAJC21         | -0,759588698 | -1,494668682 | 0,735079984 |  |
| 241368_at    | PLIN5           | -0,759588698 | -1,494668682 | 0,735079984 |  |
| 241730_at    | MYNN            | -0,759588698 | -1,494668682 | 0,735079984 |  |
| 242596_at    | -               | -0,759588698 | -1,494668682 | 0,735079984 |  |
| 202704_at    | TOB1            | 3,245961699  | 2,511262629  | 0,734699069 |  |
| 234661_at    | CCDC57          | 0,384950573  | -0,34958478  | 0,734535354 |  |
| 222309_at    | LOC100506935    | 2,845159691  | 2,110887591  | 0,7342721   |  |
| 1557506_a_at | -               | -2,262747984 | -2,996335703 | 0,733587719 |  |
| 1553336_a_at | MIER3           | -1,353583928 | -2,086984744 | 0,733400816 |  |
| 211526_s_at  | RTEL1 /// RTEL1 | -1,353583928 | -2,086984744 | 0,733400816 |  |
| 238367_s_at  | C1orf228        | -1,353583928 | -2,086984744 | 0,733400816 |  |
| 243217_at    | -               | -1,353583928 | -2,086984744 | 0,733400816 |  |
| 204176_at    | KLHL20          | 2,027765132  | 1,294497133  | 0,733267999 |  |
| 1562475_at   | DKFZp686O1327   | -1,888254346 | -2,621331989 | 0,733077644 |  |
| 1564220_a_at | LOC100506465    | -1,888254346 | -2,621331989 | 0,733077644 |  |
| 1568899_at   | -               | -1,888254346 | -2,621331989 | 0,733077644 |  |
| 1569759_at   | -               | -1,888254346 | -2,621331989 | 0,733077644 |  |
| 233462_at    | TBC1D28         | -1,888254346 | -2,621331989 | 0,733077644 |  |
| 234100_at    | -               | -1,888254346 | -2,621331989 | 0,733077644 |  |
| 234409_at    | ZNF354C         | -1,888254346 | -2,621331989 | 0,733077644 |  |
| 237413_at    | MAPK10          | -1,888254346 | -2,621331989 | 0,733077644 |  |
| 237941_at    | -               | -1,888254346 | -2,621331989 | 0,733077644 |  |
| 213072_at    | CYHR1           | 0,760715727  | 0,028364014  | 0,732351712 |  |
| 224619_at    | CASC4           | 4,646745381  | 3,914426433  | 0,732318948 |  |
| 1555573_at   | TTC40           | -0,033456564 | -0,765504029 | 0,732047465 |  |
| 237431_at    | LOC100506882    | -0,033456564 | -0,765504029 | 0,732047465 |  |
| 213688_at    | CALM1 /// CALM1 | 0,841135803  | 0,109221392  | 0,731914411 |  |
| 222007_s_at  | FKBP8           | -0,423248115 | -1,154897679 | 0,731649563 |  |
| 238506_at    | LRRC58          | -0,423248115 | -1,154897679 | 0,731649563 |  |
| 1553553_at   | TAS2R39         | -1,131062212 | -1,862647763 | 0,73158555  |  |
| 1560977_a_at | BCL2L13         | -1,131062212 | -1,862647763 | 0,73158555  |  |
| 1564010_at   | CAST            | -1,131062212 | -1,862647763 | 0,73158555  |  |
| 203619_s_at  | FAIM2           | -1,131062212 | -1,862647763 | 0,73158555  |  |
| 214374_s_at  | PPFIBP1         | -1,131062212 | -1,862647763 | 0,73158555  |  |
| 221656_s_at  | ARHGEF10L       | -1,131062212 | -1,862647763 | 0,73158555  |  |
| 234876_at    | -               | -1,131062212 | -1,862647763 | 0,73158555  |  |
| 1557206_at   | C17orf104       | -2,504600601 | -3,236070201 | 0,7314696   |  |
| 243942_at    | -               | -2,504600601 | -3,236070201 | 0,7314696   |  |
| 243965_at    | -               | -2,504600601 | -3,236070201 | 0,7314696   |  |
| 224431_s_at  | SUV420H2        | 1,187200746  | 0,456918297  | 0,730282449 |  |
| 1556978_a_at | TAF8            | -0,00073712  | -0,730778808 | 0,730041688 |  |



|              |                |              |              |             |  |
|--------------|----------------|--------------|--------------|-------------|--|
| 218085_at    | CHMP5          | 4,482391326  | 3,75237043   | 0,730020896 |  |
| 1554606_at   | CEP120         | 0,083054335  | -0,646746079 | 0,729800413 |  |
| 207366_at    | KCNS1          | 0,083054335  | -0,646746079 | 0,729800413 |  |
| 225531_at    | CABLES1        | 0,083054335  | -0,646746079 | 0,729800413 |  |
| 220784_s_at  | UTS2           | 0,627515113  | -0,102100538 | 0,729615651 |  |
| 226469_s_at  | GGT7           | -0,089689931 | -0,819238336 | 0,729548405 |  |
| 229055_at    | GPR68          | -0,089689931 | -0,819238336 | 0,729548405 |  |
| 234895_at    | CTLA4          | -0,089689931 | -0,819238336 | 0,729548405 |  |
| 229712_at    | SNAPC3         | -1,308181863 | -2,037551727 | 0,729369864 |  |
| 234362_s_at  | CTLA4          | -1,308181863 | -2,037551727 | 0,729369864 |  |
| 236563_at    | RD3            | -1,308181863 | -2,037551727 | 0,729369864 |  |
| 239439_at    | AFF4           | -1,308181863 | -2,037551727 | 0,729369864 |  |
| 244869_at    | -              | -1,308181863 | -2,037551727 | 0,729369864 |  |
| 223764_x_at  | NIPSNAP3B      | -0,221656139 | -0,950686014 | 0,729029876 |  |
| 220102_at    | FOXL2          | 0,592200562  | -0,136643983 | 0,728844544 |  |
| 235294_at    | SIKE1          | 0,592200562  | -0,136643983 | 0,728844544 |  |
| 226944_at    | HTRA3          | 0,682279745  | -0,046302147 | 0,728581892 |  |
| 1554341_a_at | HELQ           | 0,735041319  | 0,007421914  | 0,727619406 |  |
| 1563719_a_at | -              | -1,964176657 | -2,690860744 | 0,726684087 |  |
| 1566127_at   | -              | -1,964176657 | -2,690860744 | 0,726684087 |  |
| 204010_s_at  | KRAS           | -1,964176657 | -2,690860744 | 0,726684087 |  |
| 206799_at    | SCGB1D2        | -1,964176657 | -2,690860744 | 0,726684087 |  |
| 215895_x_at  | PLIN2          | -1,964176657 | -2,690860744 | 0,726684087 |  |
| 220842_at    | AHI1           | -1,964176657 | -2,690860744 | 0,726684087 |  |
| 228353_x_at  | UBASH3B        | -1,964176657 | -2,690860744 | 0,726684087 |  |
| 236503_at    | -              | -1,964176657 | -2,690860744 | 0,726684087 |  |
| 240957_at    | -              | -1,964176657 | -2,690860744 | 0,726684087 |  |
| 244423_at    | -              | -1,964176657 | -2,690860744 | 0,726684087 |  |
| 215880_at    | NAGLU          | -0,888496123 | -1,615132408 | 0,726636285 |  |
| 228952_at    | ENPP1          | -0,888496123 | -1,615132408 | 0,726636285 |  |
| 231923_at    | TMEM150C       | -0,888496123 | -1,615132408 | 0,726636285 |  |
| 236895_at    | -              | -0,888496123 | -1,615132408 | 0,726636285 |  |
| 244034_at    | -              | -0,888496123 | -1,615132408 | 0,726636285 |  |
| 242610_x_at  | -              | 0,376672223  | -0,34958478  | 0,726257004 |  |
| 1552721_a_at | FGF1           | -2,311268652 | -3,037500868 | 0,726232217 |  |
| 234866_s_at  | ZNRD1-AS1      | -2,311268652 | -3,037500868 | 0,726232217 |  |
| 215127_s_at  | RBMS1          | 4,029534322  | 3,303845028  | 0,725689294 |  |
| 238929_at    | SRSF8          | 1,512180019  | 0,786897721  | 0,725282297 |  |
| 1559585_at   | DDX60L         | 0,44160593   | -0,283667828 | 0,725273757 |  |
| 204182_s_at  | ZBTB43         | 0,882651021  | 0,157549243  | 0,725101778 |  |
| 226730_s_at  | USP37          | 2,410880861  | 1,685812099  | 0,725068762 |  |
| 224831_at    | CPEB4          | 2,261526912  | 1,536652708  | 0,724874204 |  |
| 204637_at    | CGA            | -0,325749314 | -1,050406615 | 0,724657301 |  |
| 242147_at    | -              | -0,325749314 | -1,050406615 | 0,724657301 |  |
| 204333_s_at  | AGA            | 0,401366113  | -0,322870281 | 0,724236394 |  |
| 239026_x_at  | AGAP3          | 2,303618506  | 1,579853228  | 0,723765278 |  |
| 236165_at    | MSL3           | 0,97328325   | 0,249604176  | 0,723679074 |  |
| 1558723_at   | LOC284014      | -0,496991414 | -1,220210588 | 0,723219174 |  |
| 219167_at    | RASL12         | -0,496991414 | -1,220210588 | 0,723219174 |  |
| 222941_at    | USP46          | -0,496991414 | -1,220210588 | 0,723219174 |  |
| 228575_at    | IL20RB         | -0,496991414 | -1,220210588 | 0,723219174 |  |
| 240202_x_at  | PFKP           | -0,496991414 | -1,220210588 | 0,723219174 |  |
| 244744_at    | LOC100130502   | -0,496991414 | -1,220210588 | 0,723219174 |  |
| 204006_s_at  | FCGR3A /// FCG | -2,01371626  | -2,735862426 | 0,722146165 |  |
| 239152_at    | -              | -2,01371626  | -2,735862426 | 0,722146165 |  |
| 214385_s_at  | MUC5AC         | -0,655928373 | -1,377419394 | 0,721491021 |  |

|              |                 |              |              |             |  |
|--------------|-----------------|--------------|--------------|-------------|--|
| 215715_at    | SLC6A2          | -0,655928373 | -1,377419394 | 0,721491021 |  |
| 216679_at    | DDR1-AS1        | -0,655928373 | -1,377419394 | 0,721491021 |  |
| 227714_s_at  | -               | -0,655928373 | -1,377419394 | 0,721491021 |  |
| 231201_at    | PTGER1          | -0,655928373 | -1,377419394 | 0,721491021 |  |
| 1553726_s_at | C6orf170        | -1,240169874 | -1,961547147 | 0,721377273 |  |
| 1560856_at   | ARHGAP26-AS1    | -1,240169874 | -1,961547147 | 0,721377273 |  |
| 214997_at    | SCAI            | -1,240169874 | -1,961547147 | 0,721377273 |  |
| 228100_at    | C1orf88         | -1,240169874 | -1,961547147 | 0,721377273 |  |
| 229008_at    | WDR60           | -1,240169874 | -1,961547147 | 0,721377273 |  |
| 233590_at    | LOC100506457    | -1,240169874 | -1,961547147 | 0,721377273 |  |
| 243634_at    | -               | -1,240169874 | -1,961547147 | 0,721377273 |  |
| 244850_at    | -               | -1,240169874 | -1,961547147 | 0,721377273 |  |
| 207423_s_at  | ADAM20          | -0,543051993 | -1,264005341 | 0,720953347 |  |
| 210310_s_at  | FGF5            | -0,543051993 | -1,264005341 | 0,720953347 |  |
| 234099_at    | -               | -0,543051993 | -1,264005341 | 0,720953347 |  |
| 242242_at    | USP6            | -0,543051993 | -1,264005341 | 0,720953347 |  |
| 229970_at    | KBTBD7          | 0,641402394  | -0,079522948 | 0,720925343 |  |
| 203845_at    | KAT2B           | 1,177702228  | 0,456918297  | 0,72078393  |  |
| 1556911_at   | -               | -1,688127507 | -2,408705138 | 0,720577631 |  |
| 1559145_at   | RNF144A-AS1     | -1,688127507 | -2,408705138 | 0,720577631 |  |
| 1562038_at   | -               | -1,688127507 | -2,408705138 | 0,720577631 |  |
| 1570385_at   | -               | -1,688127507 | -2,408705138 | 0,720577631 |  |
| 230569_at    | KIAA1430        | -1,688127507 | -2,408705138 | 0,720577631 |  |
| 233020_at    | -               | -1,688127507 | -2,408705138 | 0,720577631 |  |
| 240782_at    | -               | -1,688127507 | -2,408705138 | 0,720577631 |  |
| 235029_at    | GIN54           | 1,64218396   | 0,921731975  | 0,720451985 |  |
| 64900_at     | TMEM231         | 1,986199457  | 1,266124526  | 0,720074931 |  |
| 210883_x_at  | EFNB3           | 0,82905153   | 0,109221392  | 0,719830138 |  |
| 216852_x_at  | IGLJ3           | 0,152582607  | -0,566887459 | 0,719470066 |  |
| 1562731_s_at | MDS2            | -0,136301282 | -0,855751026 | 0,719449744 |  |
| 204774_at    | EVI2A           | -0,136301282 | -0,855751026 | 0,719449744 |  |
| 220198_s_at  | EIF5A2          | -0,136301282 | -0,855751026 | 0,719449744 |  |
| 237979_at    | -               | 0,228146222  | -0,490927335 | 0,719073557 |  |
| 217851_s_at  | SLMO2           | 3,89689195   | 3,178292062  | 0,718599888 |  |
| 215139_at    | ARHGEF10        | -0,394749123 | -1,112851844 | 0,718102721 |  |
| 219608_s_at  | FBXO38          | -0,394749123 | -1,112851844 | 0,718102721 |  |
| 238202_at    | -               | -0,394749123 | -1,112851844 | 0,718102721 |  |
| 244533_at    | PTPN14          | -0,394749123 | -1,112851844 | 0,718102721 |  |
| 1564125_at   | LOC285857       | -2,236765673 | -2,954576755 | 0,717811082 |  |
| 205230_at    | RPH3A           | 0,103263601  | -0,614371577 | 0,717635178 |  |
| 238104_at    | -               | 0,103263601  | -0,614371577 | 0,717635178 |  |
| 240761_at    | -               | 0,103263601  | -0,614371577 | 0,717635178 |  |
| 223932_at    | -               | 0,181384709  | -0,536087151 | 0,71747186  |  |
| 213550_s_at  | IK /// TMC06    | 1,917954284  | 1,200746069  | 0,717208215 |  |
| 1555116_s_at | SLC11A1         | -2,063149277 | -2,780313924 | 0,717164647 |  |
| 1556891_at   | SORCS1          | -2,063149277 | -2,780313924 | 0,717164647 |  |
| 1559374_at   | -               | -2,063149277 | -2,780313924 | 0,717164647 |  |
| 220664_at    | SPRR2C          | -2,063149277 | -2,780313924 | 0,717164647 |  |
| 233871_at    | -               | -2,063149277 | -2,780313924 | 0,717164647 |  |
| 238970_at    | -               | -2,063149277 | -2,780313924 | 0,717164647 |  |
| 1553565_s_at | DDAH1           | -0,43775896  | -1,154897679 | 0,717138718 |  |
| 223733_s_at  | PPP4R1L         | -0,43775896  | -1,154897679 | 0,717138718 |  |
| 224417_at    | -               | -0,43775896  | -1,154897679 | 0,717138718 |  |
| 233860_s_at  | OBP2A /// OBP2B | -0,43775896  | -1,154897679 | 0,717138718 |  |
| 239738_at    | DACH2           | -0,43775896  | -1,154897679 | 0,717138718 |  |
| 209961_s_at  | HGF             | 0,255492549  | -0,461594427 | 0,717086976 |  |

|              |                 |              |              |             |  |
|--------------|-----------------|--------------|--------------|-------------|--|
| 228363_at    | XIAP            | 3,670124012  | 2,953119918  | 0,717004094 |  |
| 203533_s_at  | CUL5            | 1,638726528  | 0,921731975  | 0,716994553 |  |
| 1552504_a_at | BRSK1           | -0,946847173 | -1,663414495 | 0,716567321 |  |
| 1553325_at   | POU5F2          | -0,946847173 | -1,663414495 | 0,716567321 |  |
| 1554116_s_at | PARP11          | -0,946847173 | -1,663414495 | 0,716567321 |  |
| 215275_at    | TRAF3IP3        | -0,946847173 | -1,663414495 | 0,716567321 |  |
| 218293_x_at  | NUP50           | -0,946847173 | -1,663414495 | 0,716567321 |  |
| 236890_at    | GTPBP5          | -0,946847173 | -1,663414495 | 0,716567321 |  |
| 238687_x_at  | ZNF770          | -0,946847173 | -1,663414495 | 0,716567321 |  |
| 205972_at    | SLC38A3         | -0,234278768 | -0,950686014 | 0,716407247 |  |
| 210184_at    | ITGAX           | -0,234278768 | -0,950686014 | 0,716407247 |  |
| 232713_at    | -               | -0,234278768 | -0,950686014 | 0,716407247 |  |
| 1559469_s_at | SIPA1L2         | -0,706943342 | -1,423348341 | 0,716405    |  |
| 235687_at    | ZNF626          | -0,706943342 | -1,423348341 | 0,716405    |  |
| 242731_x_at  | -               | -0,706943342 | -1,423348341 | 0,716405    |  |
| 1557681_s_at | SAMD15          | -1,196375121 | -1,912089812 | 0,71571469  |  |
| 205878_at    | POU6F1          | -1,196375121 | -1,912089812 | 0,71571469  |  |
| 213131_at    | OLFM1           | -1,196375121 | -1,912089812 | 0,71571469  |  |
| 228553_at    | ENAH            | -1,196375121 | -1,912089812 | 0,71571469  |  |
| 228911_at    | ADAMTS7 /// LOC | -1,196375121 | -1,912089812 | 0,71571469  |  |
| 1553346_a_at | TNRC6A          | -0,196756757 | -0,912331589 | 0,715574832 |  |
| 206955_at    | AQP7 /// LOC100 | -0,196756757 | -0,912331589 | 0,715574832 |  |
| 226570_at    | LOC100507375    | 0,457392764  | -0,258114234 | 0,715506998 |  |
| 213139_at    | SNAI2           | 0,518867317  | -0,19610998  | 0,714977297 |  |
| 203763_at    | DYNC2LI1        | 2,030406107  | 1,315948728  | 0,714457379 |  |
| 1554733_at   | LOC728175       | -2,384869671 | -3,098858316 | 0,713988645 |  |
| 204409_s_at  | EIF1AY          | -2,384869671 | -3,098858316 | 0,713988645 |  |
| 237435_at    | -               | -2,597496523 | -3,311072652 | 0,713576129 |  |
| 217823_s_at  | UBE2J1          | 3,397876879  | 2,684536601  | 0,713340278 |  |
| 226711_at    | FOXN2           | 3,503346991  | 2,791007185  | 0,712339806 |  |
| 218179_s_at  | TRAPPC11        | 2,577249059  | 1,865308541  | 0,711940517 |  |
| 205539_at    | AVIL            | -1,026571149 | -1,738067356 | 0,711496207 |  |
| 209692_at    | EYA2            | -1,026571149 | -1,738067356 | 0,711496207 |  |
| 214833_at    | TMEM63A         | -1,026571149 | -1,738067356 | 0,711496207 |  |
| 216294_s_at  | KIAA1109        | -1,026571149 | -1,738067356 | 0,711496207 |  |
| 230456_at    | -               | -1,026571149 | -1,738067356 | 0,711496207 |  |
| 233634_at    | MARVELD3        | -1,026571149 | -1,738067356 | 0,711496207 |  |
| 238471_at    | -               | -1,026571149 | -1,738067356 | 0,711496207 |  |
| 239615_at    | SLC22A5         | -1,026571149 | -1,738067356 | 0,711496207 |  |
| 217024_x_at  | -               | -0,299034815 | -1,010192375 | 0,71115756  |  |
| 232127_at    | CLCN5           | -0,299034815 | -1,010192375 | 0,71115756  |  |
| 235393_at    | -               | -0,299034815 | -1,010192375 | 0,71115756  |  |
| 238115_at    | DNAJC18         | -0,299034815 | -1,010192375 | 0,71115756  |  |
| 1557062_at   | LOC100129195    | 0,03125738   | -0,679763839 | 0,711021219 |  |
| 1569963_at   | -               | 0,03125738   | -0,679763839 | 0,711021219 |  |
| 205773_at    | CPEB3           | 0,03125738   | -0,679763839 | 0,711021219 |  |
| 226837_at    | SPRED1          | 1,575032557  | 0,864649967  | 0,710382589 |  |
| 211188_at    | CD84            | -0,83191556  | -1,541908042 | 0,709992482 |  |
| 243961_at    | LOC100505622    | -0,83191556  | -1,541908042 | 0,709992482 |  |
| 244685_at    | ANGEL1          | -0,83191556  | -1,541908042 | 0,709992482 |  |
| 1554157_a_at | WFDC8           | -0,622910612 | -1,332017329 | 0,709106717 |  |
| 207437_at    | NOVA1           | -0,622910612 | -1,332017329 | 0,709106717 |  |
| 207862_at    | UPK2            | -0,622910612 | -1,332017329 | 0,709106717 |  |
| 223752_at    | CFC1            | -0,622910612 | -1,332017329 | 0,709106717 |  |
| 226822_at    | STOX2           | -0,622910612 | -1,332017329 | 0,709106717 |  |
| 239412_at    | IRF5            | -0,622910612 | -1,332017329 | 0,709106717 |  |

|              |                  |              |              |             |  |
|--------------|------------------|--------------|--------------|-------------|--|
| 201928_at    | PKP4             | 3,406034785  | 2,697670403  | 0,708364382 |  |
| 234923_at    | RALGAPA1         | -0,022466681 | -0,730778808 | 0,708312127 |  |
| 241540_at    | -                | -0,022466681 | -0,730778808 | 0,708312127 |  |
| 1556683_x_at | -                | -2,138804305 | -2,847001814 | 0,708197509 |  |
| 1556997_a_at | LEPR             | -2,138804305 | -2,847001814 | 0,708197509 |  |
| 1559266_s_at | SKIDA1           | -2,138804305 | -2,847001814 | 0,708197509 |  |
| 1562215_at   | -                | -2,138804305 | -2,847001814 | 0,708197509 |  |
| 229623_at    | -                | -2,138804305 | -2,847001814 | 0,708197509 |  |
| 235182_at    | ISM1             | -2,138804305 | -2,847001814 | 0,708197509 |  |
| 1563181_a_at | -                | -0,512251684 | -1,220210588 | 0,707958903 |  |
| 1567686_at   | CECR9            | -0,512251684 | -1,220210588 | 0,707958903 |  |
| 202273_at    | PDGFRB           | -0,512251684 | -1,220210588 | 0,707958903 |  |
| 204800_s_at  | DHRS12           | -0,512251684 | -1,220210588 | 0,707958903 |  |
| 231430_at    | FAM181B          | -0,512251684 | -1,220210588 | 0,707958903 |  |
| 214896_at    | -                | -0,148196756 | -0,855751026 | 0,70755427  |  |
| 223326_s_at  | AGSK1 /// LOC64  | -0,148196756 | -0,855751026 | 0,70755427  |  |
| 223627_at    | MEX3B            | -0,148196756 | -0,855751026 | 0,70755427  |  |
| 208181_at    | HIST1H4A /// HIS | 1,542099044  | 0,835239052  | 0,706859991 |  |
| 236488_s_at  | -                | 0,682279745  | -0,024572586 | 0,706852332 |  |
| 236514_at    | ACOT8            | 1,331241794  | 0,624460759  | 0,706781035 |  |
| 1556480_a_at | -                | -0,112808516 | -0,819238336 | 0,70642982  |  |
| 209172_s_at  | CENPF            | 1,987559146  | 1,281471383  | 0,706087763 |  |
| 1562543_at   | -                | -2,43257096  | -3,138626879 | 0,706055919 |  |
| 230593_at    | GRIK3            | -2,43257096  | -3,138626879 | 0,706055919 |  |
| 1553021_s_at | BICD2            | -0,67289328  | -1,377419394 | 0,704526114 |  |
| 1569133_x_at | ARSK             | -0,67289328  | -1,377419394 | 0,704526114 |  |
| 202856_s_at  | SLC16A3          | -0,67289328  | -1,377419394 | 0,704526114 |  |
| 206400_at    | LGALS7 /// LGAL  | -0,67289328  | -1,377419394 | 0,704526114 |  |
| 208287_at    | HCG9             | -0,67289328  | -1,377419394 | 0,704526114 |  |
| 224099_at    | KCNH7            | -0,67289328  | -1,377419394 | 0,704526114 |  |
| 241270_at    | -                | -0,67289328  | -1,377419394 | 0,704526114 |  |
| 214048_at    | MBD4             | 2,794789337  | 2,091116676  | 0,703672662 |  |
| 208319_s_at  | RBM3             | 4,41122478   | 3,707626508  | 0,703598272 |  |
| 228765_at    | GTF2IRD2         | 2,669932407  | 1,966439221  | 0,703493186 |  |
| 224873_s_at  | MRPS25           | 1,567778694  | 0,864649967  | 0,703128726 |  |
| 1556459_at   | ARHGAP22-IT1     | -2,187914861 | -2,89013181  | 0,702216949 |  |
| 207053_at    | SLC8A1           | -2,187914861 | -2,89013181  | 0,702216949 |  |
| 210772_at    | FPR2             | -2,187914861 | -2,89013181  | 0,702216949 |  |
| 214688_at    | TLE4             | -2,187914861 | -2,89013181  | 0,702216949 |  |
| 227543_at    | RNASEH2C         | 1,233777334  | 0,532164371  | 0,701612963 |  |
| 221786_at    | C6orf120         | 4,034147209  | 3,332545245  | 0,701601964 |  |
| 226142_at    | GLIPR1           | 1,079110292  | 0,377530647  | 0,701579645 |  |
| 220510_at    | RHBG             | 0,417596971  | -0,283667828 | 0,701264798 |  |
| 1555078_at   | ZNF843           | 0,351548291  | -0,34958478  | 0,701133071 |  |
| 213403_at    | -                | 0,351548291  | -0,34958478  | 0,701133071 |  |
| 239431_at    | TICAM2 /// TMED  | 0,020670649  | -0,679763839 | 0,700434489 |  |
| 243604_at    | -                | 0,020670649  | -0,679763839 | 0,700434489 |  |
| 218586_at    | C20orf20         | 3,41414682   | 2,713921281  | 0,700225539 |  |
| 1555960_at   | HINT1            | 0,133056859  | -0,566887459 | 0,699944318 |  |
| 203789_s_at  | SEMA3C           | 0,503742507  | -0,19610998  | 0,699852487 |  |
| 222616_s_at  | USP16            | 2,331726354  | 1,632095957  | 0,699630397 |  |
| 1431_at      | CYP2E1           | -2,113928714 | -2,813272577 | 0,699343862 |  |
| 1554537_at   | TMEM126B         | 0,30867765   | -0,39061235  | 0,69929     |  |
| 201108_s_at  | THBS1            | -0,79540287  | -1,494668682 | 0,699265812 |  |
| 230397_at    | SAR1B            | -0,79540287  | -1,494668682 | 0,699265812 |  |
| 238413_at    | RRN3P3           | -0,79540287  | -1,494668682 | 0,699265812 |  |

|              |                |              |              |             |  |
|--------------|----------------|--------------|--------------|-------------|--|
| 205982_x_at  | SFTPC          | 0,052199481  | -0,646746079 | 0,698945559 |  |
| 212701_at    | TLN2           | 0,052199481  | -0,646746079 | 0,698945559 |  |
| 1556743_at   | -              | -1,089016378 | -1,787089803 | 0,698073425 |  |
| 216830_at    | HERC2 /// HERC | -1,089016378 | -1,787089803 | 0,698073425 |  |
| 221362_at    | HTR5A          | -1,089016378 | -1,787089803 | 0,698073425 |  |
| 224245_at    | INGX           | -1,089016378 | -1,787089803 | 0,698073425 |  |
| 1557683_at   | -              | -2,479842156 | -3,177802286 | 0,69796013  |  |
| 240959_at    | -              | -2,479842156 | -3,177802286 | 0,69796013  |  |
| 235744_at    | PPTC7          | -0,352951799 | -1,050406615 | 0,697454817 |  |
| 1559166_at   | -              | 0,083054335  | -0,614371577 | 0,697425911 |  |
| 212606_at    | WDFY3          | 1,560488174  | 0,864649967  | 0,695838207 |  |
| 236093_at    | -              | 0,853119696  | 0,157549243  | 0,695570453 |  |
| 1553069_at   | BRWD1-IT2      | -1,639579028 | -2,335104118 | 0,695525089 |  |
| 1559843_s_at | -              | -1,639579028 | -2,335104118 | 0,695525089 |  |
| 215135_at    | DNPEP          | -1,639579028 | -2,335104118 | 0,695525089 |  |
| 215237_at    | DOCK9          | -1,639579028 | -2,335104118 | 0,695525089 |  |
| 216666_at    | LOC93432       | -1,639579028 | -2,335104118 | 0,695525089 |  |
| 223772_s_at  | TMEM87A        | -1,639579028 | -2,335104118 | 0,695525089 |  |
| 224131_at    | HCAR1          | -1,639579028 | -2,335104118 | 0,695525089 |  |
| 233355_at    | LINC00176      | -1,639579028 | -2,335104118 | 0,695525089 |  |
| 234087_at    | -              | -1,639579028 | -2,335104118 | 0,695525089 |  |
| 243225_at    | LOC283481      | -1,639579028 | -2,335104118 | 0,695525089 |  |
| 243322_at    | -              | -1,639579028 | -2,335104118 | 0,695525089 |  |
| 243870_at    | -              | -1,639579028 | -2,335104118 | 0,695525089 |  |
| 217655_at    | LOC100127972   | 1,089278259  | 0,393761504  | 0,695516755 |  |
| 219847_at    | HDAC11         | 1,04816921   | 0,352836757  | 0,695332453 |  |
| 200938_s_at  | RERE           | -1,591296941 | -2,286583451 | 0,695286509 |  |
| 205187_at    | SMAD5          | -1,591296941 | -2,286583451 | 0,695286509 |  |
| 205747_at    | CBLN1          | -1,591296941 | -2,286583451 | 0,695286509 |  |
| 221416_at    | PLA2G2F        | -1,591296941 | -2,286583451 | 0,695286509 |  |
| 222901_s_at  | KCNJ16         | -1,591296941 | -2,286583451 | 0,695286509 |  |
| 229263_at    | IL17RD         | -1,591296941 | -2,286583451 | 0,695286509 |  |
| 236333_at    | -              | -1,591296941 | -2,286583451 | 0,695286509 |  |
| 243333_at    | -              | -1,591296941 | -2,286583451 | 0,695286509 |  |
| 1559026_at   | LOC100506599   | -1,71423189  | -2,408705138 | 0,694473248 |  |
| 213543_at    | SGCD           | -1,71423189  | -2,408705138 | 0,694473248 |  |
| 215344_at    | -              | -1,71423189  | -2,408705138 | 0,694473248 |  |
| 232600_at    | -              | -1,71423189  | -2,408705138 | 0,694473248 |  |
| 242395_at    | -              | -1,71423189  | -2,408705138 | 0,694473248 |  |
| 242620_at    | -              | -1,71423189  | -2,408705138 | 0,694473248 |  |
| 202913_at    | ARHGEF11       | 0,822971223  | 0,128747141  | 0,694224083 |  |
| 218700_s_at  | RAB7L1         | 0,822971223  | 0,128747141  | 0,694224083 |  |
| 223738_s_at  | PGM2           | 3,152077493  | 2,458228496  | 0,693848997 |  |
| 1553847_a_at | SPERT          | -1,518072576 | -2,211750327 | 0,693677752 |  |
| 1554818_s_at | DZANK1         | -1,518072576 | -2,211750327 | 0,693677752 |  |
| 204200_s_at  | PDGFB          | -1,518072576 | -2,211750327 | 0,693677752 |  |
| 208588_at    | FKSG2          | -1,518072576 | -2,211750327 | 0,693677752 |  |
| 220822_at    | -              | -1,518072576 | -2,211750327 | 0,693677752 |  |
| 239700_at    | ZNF710         | -1,518072576 | -2,211750327 | 0,693677752 |  |
| 242053_at    | -              | -1,518072576 | -2,211750327 | 0,693677752 |  |
| 1562687_x_at | -              | -1,763254337 | -2,456406426 | 0,693152089 |  |
| 1562904_s_at | FLJ10661       | -1,763254337 | -2,456406426 | 0,693152089 |  |
| 206496_at    | FMO3           | -1,763254337 | -2,456406426 | 0,693152089 |  |
| 220932_at    | -              | -1,763254337 | -2,456406426 | 0,693152089 |  |
| 230694_at    | SLC35E2B       | -1,763254337 | -2,456406426 | 0,693152089 |  |
| 222612_at    | PSPC1          | 0,613492853  | -0,079522948 | 0,693015801 |  |



|              |                 |              |              |             |  |
|--------------|-----------------|--------------|--------------|-------------|--|
| 1564362_x_at | ZNF843          | 1,783520648  | 1,090553537  | 0,692967111 |  |
| 1438_at      | EPHB3           | 0,190865712  | -0,50192623  | 0,692791942 |  |
| 236526_x_at  | C5orf44         | 0,496120222  | -0,19610998  | 0,692230202 |  |
| 1552818_a_at | BRS3            | -2,262747984 | -2,954576755 | 0,691828771 |  |
| 1557517_a_at | -               | -2,262747984 | -2,954576755 | 0,691828771 |  |
| 1560646_at   | METTTL21CP1     | -2,262747984 | -2,954576755 | 0,691828771 |  |
| 1564932_at   | -               | -2,262747984 | -2,954576755 | 0,691828771 |  |
| 208027_s_at  | TLL2            | -2,262747984 | -2,954576755 | 0,691828771 |  |
| 217282_at    | MAN1A2          | -2,262747984 | -2,954576755 | 0,691828771 |  |
| 217558_at    | CYP2C9          | -2,262747984 | -2,954576755 | 0,691828771 |  |
| 232504_at    | LOC285628 /// M | -2,262747984 | -2,954576755 | 0,691828771 |  |
| 1553734_at   | AK7             | -1,470833215 | -2,162639771 | 0,691806556 |  |
| 1555052_a_at | SYT9            | -1,470833215 | -2,162639771 | 0,691806556 |  |
| 1566221_at   | -               | -1,470833215 | -2,162639771 | 0,691806556 |  |
| 207204_at    | FSCN2           | -1,470833215 | -2,162639771 | 0,691806556 |  |
| 211640_x_at  | IGHG1 /// IGHM  | -1,470833215 | -2,162639771 | 0,691806556 |  |
| 213475_s_at  | ITGAL           | -1,470833215 | -2,162639771 | 0,691806556 |  |
| 217016_x_at  | TMEM212         | -1,470833215 | -2,162639771 | 0,691806556 |  |
| 221130_s_at  | -               | -1,470833215 | -2,162639771 | 0,691806556 |  |
| 233857_s_at  | ASB2            | -1,470833215 | -2,162639771 | 0,691806556 |  |
| 234835_at    | LOC100506667    | -1,470833215 | -2,162639771 | 0,691806556 |  |
| 235888_at    | GUSBP1          | -1,470833215 | -2,162639771 | 0,691806556 |  |
| 236728_at    | LNPEP           | -1,470833215 | -2,162639771 | 0,691806556 |  |
| 238405_at    | -               | -1,470833215 | -2,162639771 | 0,691806556 |  |
| 239852_at    | MMAA            | -1,470833215 | -2,162639771 | 0,691806556 |  |
| 208809_s_at  | C6orf62         | 6,16251088   | 5,47085447   | 0,69165641  |  |
| 223588_at    | THAP2           | -1,812418401 | -2,503677622 | 0,691259221 |  |
| 233241_at    | PLK1S1          | -1,812418401 | -2,503677622 | 0,691259221 |  |
| 241863_x_at  | -               | -1,812418401 | -2,503677622 | 0,691259221 |  |
| 1570219_at   | LOXL4           | 0,20027154   | -0,490927335 | 0,691198875 |  |
| 207855_s_at  | CLCC1           | 1,868628927  | 1,177496821  | 0,691132106 |  |
| 1563445_x_at | CTSL1P8         | -0,85085127  | -1,541908042 | 0,691056772 |  |
| 205805_s_at  | ROR1            | -0,85085127  | -1,541908042 | 0,691056772 |  |
| 209933_s_at  | CD300A          | -0,85085127  | -1,541908042 | 0,691056772 |  |
| 210113_s_at  | NLRP1           | -0,85085127  | -1,541908042 | 0,691056772 |  |
| 216346_at    | SEC14L3         | -0,85085127  | -1,541908042 | 0,691056772 |  |
| 224258_at    | DBIL5P2         | -0,85085127  | -1,541908042 | 0,691056772 |  |
| 235000_at    | LPP             | -0,85085127  | -1,541908042 | 0,691056772 |  |
| 235649_at    | ADAMTS8         | -0,85085127  | -1,541908042 | 0,691056772 |  |
| 1557772_at   | -               | -2,089474779 | -2,780313924 | 0,690839145 |  |
| 1559614_at   | FLJ38773        | -2,089474779 | -2,780313924 | 0,690839145 |  |
| 204840_s_at  | EEA1            | -2,089474779 | -2,780313924 | 0,690839145 |  |
| 211829_s_at  | GPBR            | -2,089474779 | -2,780313924 | 0,690839145 |  |
| 232081_at    | -               | -2,089474779 | -2,780313924 | 0,690839145 |  |
| 240801_at    | C21orf37        | -2,089474779 | -2,780313924 | 0,690839145 |  |
| 244614_at    | TFG             | -2,089474779 | -2,780313924 | 0,690839145 |  |
| 212889_x_at  | GADD45GIP1      | -0,221656139 | -0,912331589 | 0,69067545  |  |
| 215611_at    | TCF12           | -0,221656139 | -0,912331589 | 0,69067545  |  |
| 224171_at    | LSM14B          | -0,221656139 | -0,912331589 | 0,69067545  |  |
| 241396_at    | NEDD4L          | -0,221656139 | -0,912331589 | 0,69067545  |  |
| 1558847_at   | LINC00565       | -1,047650486 | -1,738067356 | 0,69041687  |  |
| 1561887_at   | -               | -1,047650486 | -1,738067356 | 0,69041687  |  |
| 1570274_at   | PRSS55          | -1,047650486 | -1,738067356 | 0,69041687  |  |
| 205727_at    | TEP1            | -1,047650486 | -1,738067356 | 0,69041687  |  |
| 213125_at    | OLFML2B         | -1,047650486 | -1,738067356 | 0,69041687  |  |
| 215100_at    | ADTRP           | -1,047650486 | -1,738067356 | 0,69041687  |  |

|              |                  |              |              |             |  |
|--------------|------------------|--------------|--------------|-------------|--|
| 217017_at    | OSBPL10          | -1,047650486 | -1,738067356 | 0,69041687  |  |
| 221124_s_at  | VSX1             | -1,047650486 | -1,738067356 | 0,69041687  |  |
| 233042_at    | -                | -1,047650486 | -1,738067356 | 0,69041687  |  |
| 237424_at    | -                | -1,047650486 | -1,738067356 | 0,69041687  |  |
| 244547_at    | SGK494           | -1,047650486 | -1,738067356 | 0,69041687  |  |
| 1569500_at   | -                | 0,123193849  | -0,566887459 | 0,690081309 |  |
| 240698_s_at  | -                | 0,123193849  | -0,566887459 | 0,690081309 |  |
| 1555912_at   | ST7-AS1          | 0,228146222  | -0,461594427 | 0,689740648 |  |
| 233645_s_at  | C1RL             | 0,228146222  | -0,461594427 | 0,689740648 |  |
| 215209_at    | SEC24D           | -0,423248115 | -1,112851844 | 0,689603729 |  |
| 222210_at    | KIAA0195         | -0,423248115 | -1,112851844 | 0,689603729 |  |
| 229316_at    | -                | -0,423248115 | -1,112851844 | 0,689603729 |  |
| 238330_s_at  | MPRIP            | -0,423248115 | -1,112851844 | 0,689603729 |  |
| 244099_at    | CACNG2           | -0,423248115 | -1,112851844 | 0,689603729 |  |
| 209775_x_at  | SLC19A1          | -0,57445847  | -1,264005341 | 0,68954687  |  |
| 210943_s_at  | LYST             | -0,57445847  | -1,264005341 | 0,68954687  |  |
| 216894_x_at  | CDKN1C           | -0,57445847  | -1,264005341 | 0,68954687  |  |
| 230771_at    | NKAIN4           | -0,57445847  | -1,264005341 | 0,68954687  |  |
| 242707_at    | MED23            | -0,57445847  | -1,264005341 | 0,68954687  |  |
| 1555799_at   | FCRL5            | -1,173767127 | -1,862647763 | 0,688880636 |  |
| 202202_s_at  | LAMA4            | -1,173767127 | -1,862647763 | 0,688880636 |  |
| 215191_at    | -                | -1,173767127 | -1,862647763 | 0,688880636 |  |
| 221195_at    | RNFT1            | -1,173767127 | -1,862647763 | 0,688880636 |  |
| 231309_at    | GNA12            | -1,173767127 | -1,862647763 | 0,688880636 |  |
| 234447_at    | -                | -1,173767127 | -1,862647763 | 0,688880636 |  |
| 1557203_at   | PABPC1L2A /// P  | 1,326951551  | 0,638150376  | 0,688801174 |  |
| 209774_x_at  | CXCL2            | 0,152582607  | -0,536087151 | 0,688669758 |  |
| 1553619_a_at | TRIM43 /// TRIM4 | -0,926850548 | -1,615132408 | 0,688281859 |  |
| 1561611_at   | -                | -0,926850548 | -1,615132408 | 0,688281859 |  |
| 206719_at    | SYNGR4           | -0,926850548 | -1,615132408 | 0,688281859 |  |
| 210388_at    | PLCB2            | -0,926850548 | -1,615132408 | 0,688281859 |  |
| 216675_at    | -                | -0,926850548 | -1,615132408 | 0,688281859 |  |
| 220224_at    | HAO1             | -0,926850548 | -1,615132408 | 0,688281859 |  |
| 227509_x_at  | -                | -0,926850548 | -1,615132408 | 0,688281859 |  |
| 230658_at    | SLC7A2           | -0,926850548 | -1,615132408 | 0,688281859 |  |
| 1555452_at   | RALGPS1          | 0,695652136  | 0,007421914  | 0,688230223 |  |
| 229701_at    | DNAJC9           | -0,467091869 | -1,154897679 | 0,68780581  |  |
| 239139_at    | CPNE9            | -0,467091869 | -1,154897679 | 0,68780581  |  |
| 240210_at    | ATAD3C           | -0,467091869 | -1,154897679 | 0,68780581  |  |
| 1552584_at   | IL12RB1          | -1,399512875 | -2,086984744 | 0,687471868 |  |
| 1556004_at   | LOC100506777     | -1,399512875 | -2,086984744 | 0,687471868 |  |
| 1562390_at   | -                | -1,399512875 | -2,086984744 | 0,687471868 |  |
| 1568906_at   | LOC728196        | -1,399512875 | -2,086984744 | 0,687471868 |  |
| 205932_s_at  | MSX1             | -1,399512875 | -2,086984744 | 0,687471868 |  |
| 207726_at    | ESRRB            | -1,399512875 | -2,086984744 | 0,687471868 |  |
| 228010_at    | PPP2R2C          | -1,399512875 | -2,086984744 | 0,687471868 |  |
| 207961_x_at  | MYH11            | -0,078265071 | -0,765504029 | 0,687238958 |  |
| 210204_s_at  | CNOT4            | -0,078265071 | -0,765504029 | 0,687238958 |  |
| 233531_at    | SLC46A1          | -0,078265071 | -0,765504029 | 0,687238958 |  |
| 238425_at    | PSMB2            | 0,715481152  | 0,028364014  | 0,687117137 |  |
| 39318_at     | TCL1A            | -1,469630988 | -2,1567009   | 0,687069912 |  |
| 1553470_at   | DNAH17           | -1,888254346 | -2,575129729 | 0,686875383 |  |
| 206043_s_at  | ATP2C2           | -1,888254346 | -2,575129729 | 0,686875383 |  |
| 206045_s_at  | NOL4             | -1,888254346 | -2,575129729 | 0,686875383 |  |
| 216093_at    | -                | -1,888254346 | -2,575129729 | 0,686875383 |  |
| 227188_at    | FAM176C          | -1,888254346 | -2,575129729 | 0,686875383 |  |

|              |                |              |              |             |  |
|--------------|----------------|--------------|--------------|-------------|--|
| 234060_at    | -              | -1,888254346 | -2,575129729 | 0,686875383 |  |
| 241444_at    | -              | -1,888254346 | -2,575129729 | 0,686875383 |  |
| 242132_x_at  | -              | -1,888254346 | -2,575129729 | 0,686875383 |  |
| 231106_at    | BMS1P2 /// BMS | 0,606430281  | -0,079522948 | 0,68595323  |  |
| 218158_s_at  | APPL1          | 2,064305961  | 1,378453643  | 0,685852317 |  |
| 206235_at    | LIG4           | 1,90937145   | 1,223626587  | 0,685744862 |  |
| 213686_at    | VPS13A         | 1,079110292  | 0,393761504  | 0,685348788 |  |
| 1558397_at   | PECAM1         | -2,311268652 | -2,996335703 | 0,685067051 |  |
| 236917_at    | LRRC34         | 0,401366113  | -0,283667828 | 0,68503394  |  |
| 241734_at    | SRFBP1         | 1,037706275  | 0,352836757  | 0,684869518 |  |
| 234749_s_at  | POC1A          | 0,934330293  | 0,249604176  | 0,684726117 |  |
| 1554834_a_at | RASSF5         | -0,325749314 | -1,010192375 | 0,684443061 |  |
| 1556986_at   | OR2H1          | -0,325749314 | -1,010192375 | 0,684443061 |  |
| 203769_s_at  | STS            | -0,325749314 | -1,010192375 | 0,684443061 |  |
| 240410_at    | -              | -0,325749314 | -1,010192375 | 0,684443061 |  |
| 219487_at    | BBS10          | 1,238353345  | 0,553993624  | 0,684359721 |  |
| 1559642_a_at | -              | -1,353583928 | -2,037551727 | 0,683967799 |  |
| 1568695_s_at | INTS6          | -1,353583928 | -2,037551727 | 0,683967799 |  |
| 222080_s_at  | SIRT5          | -1,353583928 | -2,037551727 | 0,683967799 |  |
| 229834_at    | NFIX           | -1,353583928 | -2,037551727 | 0,683967799 |  |
| 233115_at    | -              | -1,353583928 | -2,037551727 | 0,683967799 |  |
| 238924_at    | BMS1P1 /// BMS | -1,353583928 | -2,037551727 | 0,683967799 |  |
| 239385_at    | TFG            | -1,353583928 | -2,037551727 | 0,683967799 |  |
| 241021_at    | -              | -1,353583928 | -2,037551727 | 0,683967799 |  |
| 229167_at    | PURA           | 1,251994932  | 0,568365095  | 0,683629837 |  |
| 1555308_at   | CARD14         | -0,366776884 | -1,050406615 | 0,683629731 |  |
| 1555448_at   | AP5M1          | -0,366776884 | -1,050406615 | 0,683629731 |  |
| 1557878_at   | -              | -0,366776884 | -1,050406615 | 0,683629731 |  |
| 1563244_at   | -              | -0,366776884 | -1,050406615 | 0,683629731 |  |
| 212810_s_at  | SLC1A4         | -0,366776884 | -1,050406615 | 0,683629731 |  |
| 244559_at    | -              | -0,366776884 | -1,050406615 | 0,683629731 |  |
| 1559344_at   | -              | -1,937711681 | -2,621331989 | 0,683620308 |  |
| 1563469_at   | -              | -1,937711681 | -2,621331989 | 0,683620308 |  |
| 1566664_at   | CCDC168        | -1,937711681 | -2,621331989 | 0,683620308 |  |
| 1570424_at   | -              | -1,937711681 | -2,621331989 | 0,683620308 |  |
| 206312_at    | GUCY2C         | -1,937711681 | -2,621331989 | 0,683620308 |  |
| 214539_at    | SERPINB10      | -1,937711681 | -2,621331989 | 0,683620308 |  |
| 229923_at    | ZDHHC21        | -1,937711681 | -2,621331989 | 0,683620308 |  |
| 232026_at    | HERC4          | -1,937711681 | -2,621331989 | 0,683620308 |  |
| 240967_at    | KRTAP19-3      | -1,937711681 | -2,621331989 | 0,683620308 |  |
| 219138_at    | RPL14          | 2,37600538   | 1,692388143  | 0,683617237 |  |
| 232085_at    | MAPK8IP3       | -0,172274514 | -0,855751026 | 0,683476512 |  |
| 237222_at    | FSD2           | -0,172274514 | -0,855751026 | 0,683476512 |  |
| 219104_at    | RNF141         | 1,163336153  | 0,479907041  | 0,683429112 |  |
| 1553693_s_at | CBR4           | -0,136301282 | -0,819238336 | 0,682937054 |  |
| 1557720_s_at | MYO16          | -0,136301282 | -0,819238336 | 0,682937054 |  |
| 204555_s_at  | PPP1R3D        | -0,136301282 | -0,819238336 | 0,682937054 |  |
| 229362_at    | PUS10          | 1,683039483  | 1,000684521  | 0,682354962 |  |
| 230399_at    | -              | 1,139070151  | 0,456918297  | 0,682151853 |  |
| 220952_s_at  | PLEKHA5        | 0,810733188  | 0,128747141  | 0,681986047 |  |
| 221519_at    | FBXW4          | 1,64218396   | 0,960386719  | 0,681797241 |  |
| 213325_at    | PVRL3          | 0,291166226  | -0,39061235  | 0,681778576 |  |
| 1554406_a_at | CLEC7A         | -0,741668563 | -1,423348341 | 0,681679779 |  |
| 1559293_x_at | LINC00032      | -0,741668563 | -1,423348341 | 0,681679779 |  |
| 210309_at    | RECQL5         | -0,741668563 | -1,423348341 | 0,681679779 |  |
| 210356_x_at  | MS4A1          | -0,741668563 | -1,423348341 | 0,681679779 |  |

|              |                  |              |              |             |  |
|--------------|------------------|--------------|--------------|-------------|--|
| 210546_x_at  | CTAG1A /// CTA   | -0,741668563 | -1,423348341 | 0,681679779 |  |
| 210656_at    | EED              | -0,741668563 | -1,423348341 | 0,681679779 |  |
| 228540_at    | QKI              | -0,741668563 | -1,423348341 | 0,681679779 |  |
| 236783_at    | KCNIP4           | -0,741668563 | -1,423348341 | 0,681679779 |  |
| 240634_x_at  | -                | -0,741668563 | -1,423348341 | 0,681679779 |  |
| 229123_at    | -                | 1,575032557  | 0,893473268  | 0,681559289 |  |
| 224261_at    | -                | 0,760715727  | 0,079428135  | 0,681287591 |  |
| 243927_x_at  | KIAA1429         | 1,795990708  | 1,115234684  | 0,680756023 |  |
| 204829_s_at  | FOLR2            | 0,57782909   | -0,102100538 | 0,679929628 |  |
| 227277_at    | MTDH             | 1,69307511   | 1,013870809  | 0,679204301 |  |
| 225840_at    | TEF              | 0,928678725  | 0,249604176  | 0,679074549 |  |
| 242208_at    | ZNF37BP          | -0,00073712  | -0,679763839 | 0,679026719 |  |
| 1557293_at   | LOC440993        | 0,518867317  | -0,160136748 | 0,679004065 |  |
| 223249_at    | CLDN12           | 2,069451339  | 1,390636111  | 0,678815228 |  |
| 206894_at    | APOA4            | -0,234278768 | -0,912331589 | 0,678052821 |  |
| 224328_s_at  | LCE3D            | -0,234278768 | -0,912331589 | 0,678052821 |  |
| 244631_at    | LOC389834        | 0,03125738   | -0,646746079 | 0,678003459 |  |
| 208347_at    | -                | 0,900083947  | 0,222599095  | 0,677484853 |  |
| 1554187_at   | LOC554206        | -2,01371626  | -2,690860744 | 0,677144484 |  |
| 207636_at    | SERPINI2         | -2,01371626  | -2,690860744 | 0,677144484 |  |
| 211286_x_at  | CSF2RA           | -2,01371626  | -2,690860744 | 0,677144484 |  |
| 232271_at    | HNF4G            | -2,01371626  | -2,690860744 | 0,677144484 |  |
| 206040_s_at  | MAPK11           | -0,986356909 | -1,663414495 | 0,677057586 |  |
| 215145_s_at  | CNTNAP2          | -0,986356909 | -1,663414495 | 0,677057586 |  |
| 221384_at    | UCP1             | -0,986356909 | -1,663414495 | 0,677057586 |  |
| 230190_at    | NDFIP2           | -0,986356909 | -1,663414495 | 0,677057586 |  |
| 230858_at    | LOC100499467     | -0,986356909 | -1,663414495 | 0,677057586 |  |
| 234174_at    | -                | -0,986356909 | -1,663414495 | 0,677057586 |  |
| 234284_at    | GNG8             | -0,986356909 | -1,663414495 | 0,677057586 |  |
| 237559_at    | GPR55            | -0,986356909 | -1,663414495 | 0,677057586 |  |
| 1554852_a_at | KIAA1257         | -1,2845686   | -1,961547147 | 0,676978547 |  |
| 1558941_at   | ZNF704           | -1,2845686   | -1,961547147 | 0,676978547 |  |
| 1559535_s_at | -                | -1,2845686   | -1,961547147 | 0,676978547 |  |
| 1560537_at   | LOC100129662     | -1,2845686   | -1,961547147 | 0,676978547 |  |
| 1560968_at   | -                | -1,2845686   | -1,961547147 | 0,676978547 |  |
| 208222_at    | ACVR1B           | -1,2845686   | -1,961547147 | 0,676978547 |  |
| 229124_at    | PROK1            | -1,2845686   | -1,961547147 | 0,676978547 |  |
| 231695_at    | -                | -1,2845686   | -1,961547147 | 0,676978547 |  |
| 239446_x_at  | DCBLD2           | -1,2845686   | -1,961547147 | 0,676978547 |  |
| 239557_at    | -                | -1,2845686   | -1,961547147 | 0,676978547 |  |
| 243951_at    | ABCB1            | -1,2845686   | -1,961547147 | 0,676978547 |  |
| 244278_at    | -                | -1,2845686   | -1,961547147 | 0,676978547 |  |
| 1554807_a_at | SPIRE1           | 0,480753764  | -0,19610998  | 0,676863744 |  |
| 212824_at    | FUBP3            | 4,574391988  | 3,898162764  | 0,676229225 |  |
| 215278_at    | -                | -0,655928373 | -1,332017329 | 0,676088956 |  |
| 235829_at    | CAHM             | -0,655928373 | -1,332017329 | 0,676088956 |  |
| 239903_at    | TPBG             | -0,655928373 | -1,332017329 | 0,676088956 |  |
| 241134_at    | -                | -0,655928373 | -1,332017329 | 0,676088956 |  |
| 227091_at    | CCDC146          | -0,089689931 | -0,765504029 | 0,675814098 |  |
| 235502_at    | MIR3661 /// PPP2 | -0,089689931 | -0,765504029 | 0,675814098 |  |
| 240325_x_at  | -                | -0,089689931 | -0,765504029 | 0,675814098 |  |
| 210768_x_at  | TMCO1            | 3,75400739   | 3,078904771  | 0,675102619 |  |
| 219746_at    | DPF3             | 1,011212064  | 0,336136178  | 0,675075886 |  |
| 200632_s_at  | NDRG1            | 0,682279745  | 0,007421914  | 0,674857832 |  |
| 234982_at    | UBR3             | 4,260221813  | 3,585762986  | 0,674458827 |  |
| 229038_at    | CWF19L1          | 0,351548291  | -0,322870281 | 0,674418572 |  |

|              |                  |              |              |             |  |
|--------------|------------------|--------------|--------------|-------------|--|
| 234441_at    | -                | 0,351548291  | -0,322870281 | 0,674418572 |  |
| 220185_at    | SPTBN4           | 1,027166904  | 0,352836757  | 0,674330147 |  |
| 214785_at    | VPS13A           | 1,567778694  | 0,893473268  | 0,674305426 |  |
| 211610_at    | KLF6             | 0,255492549  | -0,41858459  | 0,674077139 |  |
| 225856_at    | CLOCK            | 0,255492549  | -0,41858459  | 0,674077139 |  |
| 233612_at    | -                | 0,255492549  | -0,41858459  | 0,674077139 |  |
| 217508_s_at  | C18orf25         | 0,702292136  | 0,028364014  | 0,673928122 |  |
| 214278_s_at  | NDRG2            | -0,59053611  | -1,264005341 | 0,67346923  |  |
| 215820_x_at  | SNX13            | -0,59053611  | -1,264005341 | 0,67346923  |  |
| 216631_s_at  | -                | -0,59053611  | -1,264005341 | 0,67346923  |  |
| 219592_at    | MCPH1            | -0,59053611  | -1,264005341 | 0,67346923  |  |
| 238693_at    | PHC3             | -0,59053611  | -1,264005341 | 0,67346923  |  |
| 241477_at    | MIR631 /// NEIL1 | -0,59053611  | -1,264005341 | 0,67346923  |  |
| 222426_at    | MAPKAP1          | 1,850809354  | 1,177496821  | 0,673312534 |  |
| 1561544_at   | -                | -2,063149277 | -2,735862426 | 0,672713148 |  |
| 1570327_at   | C20orf62         | -2,063149277 | -2,735862426 | 0,672713148 |  |
| 206285_at    | NPHP1            | -2,063149277 | -2,735862426 | 0,672713148 |  |
| 216027_at    | TMX4             | -2,063149277 | -2,735862426 | 0,672713148 |  |
| 220907_at    | GPR110           | -2,063149277 | -2,735862426 | 0,672713148 |  |
| 230324_at    | -                | -2,063149277 | -2,735862426 | 0,672713148 |  |
| 222283_at    | ZNF480           | 0,181384709  | -0,490927335 | 0,672312044 |  |
| 225875_s_at  | NIPAL3           | 0,181384709  | -0,490927335 | 0,672312044 |  |
| 238228_at    | -                | 0,181384709  | -0,490927335 | 0,672312044 |  |
| 242679_at    | TTN-AS1          | 0,181384709  | -0,490927335 | 0,672312044 |  |
| 233899_x_at  | ZBTB10           | 1,296557217  | 0,624460759  | 0,672096458 |  |
| 1559517_a_at | SPIRE1           | -1,240169874 | -1,912089812 | 0,671919938 |  |
| 215521_at    | PHC3             | -1,240169874 | -1,912089812 | 0,671919938 |  |
| 215869_at    | -                | -1,240169874 | -1,912089812 | 0,671919938 |  |
| 232843_s_at  | DOCK8            | 1,261018186  | 0,589657387  | 0,671360799 |  |
| 211203_s_at  | CNTN1            | 0,209623097  | -0,461594427 | 0,671217524 |  |
| 243983_at    | -                | 0,209623097  | -0,461594427 | 0,671217524 |  |
| 1566884_at   | -                | -0,148196756 | -0,819238336 | 0,67104158  |  |
| 222362_at    | AGFG2            | -0,148196756 | -0,819238336 | 0,67104158  |  |
| 232828_at    | NALCN-AS1        | -0,148196756 | -0,819238336 | 0,67104158  |  |
| 242473_at    | TRAF4            | -0,148196756 | -0,819238336 | 0,67104158  |  |
| 219536_s_at  | ZFP64            | 0,533835206  | -0,136643983 | 0,670479189 |  |
| 1557292_a_at | MCOLN3           | -0,706943342 | -1,377419394 | 0,670476052 |  |
| 1558289_at   | RFT1             | -0,706943342 | -1,377419394 | 0,670476052 |  |
| 207395_at    | BTN1A1           | -0,706943342 | -1,377419394 | 0,670476052 |  |
| 224176_s_at  | AXIN2            | -0,706943342 | -1,377419394 | 0,670476052 |  |
| 230431_at    | -                | -0,706943342 | -1,377419394 | 0,670476052 |  |
| 234040_at    | HELLS            | -0,706943342 | -1,377419394 | 0,670476052 |  |
| 1564155_x_at | -                | 0,103263601  | -0,566887459 | 0,670151061 |  |
| 204655_at    | CCL5             | 0,103263601  | -0,566887459 | 0,670151061 |  |
| 220471_s_at  | MYCT1            | 1,406361373  | 0,73688026   | 0,669481113 |  |
| 223481_s_at  | MRPL47           | 0,728550685  | 0,059218869  | 0,669331817 |  |
| 228971_at    | -                | 1,799091453  | 1,129843209  | 0,669248245 |  |
| 213871_s_at  | C6orf108         | 0,133056859  | -0,536087151 | 0,669144009 |  |
| 236476_at    | -                | 0,384950573  | -0,283667828 | 0,668618401 |  |
| 204889_s_at  | NEURL            | 0,747935635  | 0,079428135  | 0,6685075   |  |
| 1554594_at   | ARHGAP27         | -1,543331864 | -2,211750327 | 0,668418463 |  |
| 1569832_at   | LOC100131655     | -1,543331864 | -2,211750327 | 0,668418463 |  |
| 1570190_at   | LSAMP            | -1,543331864 | -2,211750327 | 0,668418463 |  |
| 205403_at    | IL1R2            | -1,543331864 | -2,211750327 | 0,668418463 |  |
| 208412_s_at  | RARB             | -1,543331864 | -2,211750327 | 0,668418463 |  |
| 237214_at    | TFRC             | -1,543331864 | -2,211750327 | 0,668418463 |  |



|              |                 |              |              |             |  |
|--------------|-----------------|--------------|--------------|-------------|--|
| 241227_at    | -               | -1,543331864 | -2,211750327 | 0,668418463 |  |
| 1553061_at   | OR6W1P          | -0,946847173 | -1,615132408 | 0,668285235 |  |
| 1553122_s_at | LOC389458 /// R | -0,946847173 | -1,615132408 | 0,668285235 |  |
| 1553531_at   | PCSK6           | -0,946847173 | -1,615132408 | 0,668285235 |  |
| 1562764_at   | LOC100507351    | -0,946847173 | -1,615132408 | 0,668285235 |  |
| 217670_at    | RPLP2           | -0,946847173 | -1,615132408 | 0,668285235 |  |
| 229469_at    | XAGE2 /// XAGE  | -0,946847173 | -1,615132408 | 0,668285235 |  |
| 220208_at    | ADAMTS13        | 0,917308734  | 0,249604176  | 0,667704558 |  |
| 222475_at    | SAP30BP         | 1,454352496  | 0,786897721  | 0,667454775 |  |
| 240429_at    | ZNF546          | 0,317354302  | -0,34958478  | 0,666939082 |  |
| 213963_s_at  | SAP30           | 0,87091093   | 0,204310755  | 0,666600175 |  |
| 1557091_at   | MAMSTR          | 0,052199481  | -0,614371577 | 0,666571057 |  |
| 236079_at    | LOC202025       | 0,052199481  | -0,614371577 | 0,666571057 |  |
| 237855_at    | ZNF777          | 0,052199481  | -0,614371577 | 0,666571057 |  |
| 229174_at    | C3orf38         | 3,149650293  | 2,483094137  | 0,666556157 |  |
| 229169_at    | TTC18           | -2,43257096  | -3,098858316 | 0,666287356 |  |
| 1555439_at   | GTF3C3          | -1,196375121 | -1,862647763 | 0,666272641 |  |
| 214376_at    | -               | -1,196375121 | -1,862647763 | 0,666272641 |  |
| 217195_at    | -               | -1,196375121 | -1,862647763 | 0,666272641 |  |
| 235619_at    | ASB4            | -1,196375121 | -1,862647763 | 0,666272641 |  |
| 236610_at    | -               | -1,196375121 | -1,862647763 | 0,666272641 |  |
| 239764_at    | -               | -1,196375121 | -1,862647763 | 0,666272641 |  |
| 1554383_a_at | TRAM2           | 0,641402394  | -0,024572586 | 0,665974981 |  |
| 230005_at    | SVIP            | 3,565667132  | 2,900133867  | 0,665533265 |  |
| 217430_x_at  | COL1A1          | 2,573632254  | 1,908311039  | 0,665321215 |  |
| 1563259_at   | -               | 0,246434561  | -0,41858459  | 0,665019151 |  |
| 210251_s_at  | RUFY3           | 0,246434561  | -0,41858459  | 0,665019151 |  |
| 215681_at    | KIAA1654        | 0,246434561  | -0,41858459  | 0,665019151 |  |
| 219272_at    | TRIM62          | 0,246434561  | -0,41858459  | 0,665019151 |  |
| 1556465_at   | -               | -1,838812296 | -2,503677622 | 0,664865326 |  |
| 1559633_a_at | CHRM3           | -1,838812296 | -2,503677622 | 0,664865326 |  |
| 1564820_at   | -               | -1,838812296 | -2,503677622 | 0,664865326 |  |
| 207478_at    | -               | -1,838812296 | -2,503677622 | 0,664865326 |  |
| 220360_at    | THAP9           | -1,838812296 | -2,503677622 | 0,664865326 |  |
| 231142_at    | -               | -1,838812296 | -2,503677622 | 0,664865326 |  |
| 230208_at    | HCN4            | -0,285837228 | -0,950686014 | 0,664848786 |  |
| 243116_at    | PIP5KL1         | -0,285837228 | -0,950686014 | 0,664848786 |  |
| 37004_at     | SFTPFB          | -0,414543702 | -1,079163354 | 0,664619651 |  |
| 214408_s_at  | RFPL1-AS1 /// R | -0,759588698 | -1,423348341 | 0,663759643 |  |
| 216968_at    | MASP2           | -0,759588698 | -1,423348341 | 0,663759643 |  |
| 228890_at    | ATOH8           | -0,759588698 | -1,423348341 | 0,663759643 |  |
| 236228_at    | LOC100130744    | -0,759588698 | -1,423348341 | 0,663759643 |  |
| 239582_at    | PML             | -0,759588698 | -1,423348341 | 0,663759643 |  |
| 240077_at    | -               | -0,759588698 | -1,423348341 | 0,663759643 |  |
| 208547_at    | HIST1H2BB       | 1,596577845  | 0,932882274  | 0,663695571 |  |
| 32625_at     | NPR1            | -0,345897123 | -1,009110727 | 0,663213604 |  |
| 1561896_at   | -               | -1,424023738 | -2,086984744 | 0,662961005 |  |
| 1566503_at   | -               | -1,424023738 | -2,086984744 | 0,662961005 |  |
| 202270_at    | GBP1            | -1,424023738 | -2,086984744 | 0,662961005 |  |
| 202995_s_at  | FBLN1           | -1,424023738 | -2,086984744 | 0,662961005 |  |
| 217483_at    | FOLH1           | -1,424023738 | -2,086984744 | 0,662961005 |  |
| 226304_at    | HSPB6           | -1,424023738 | -2,086984744 | 0,662961005 |  |
| 233769_at    | -               | -1,424023738 | -2,086984744 | 0,662961005 |  |
| 236440_at    | NETO1           | -1,424023738 | -2,086984744 | 0,662961005 |  |
| 238713_at    | -               | -1,424023738 | -2,086984744 | 0,662961005 |  |
| 1569502_s_at | TP73-AS1        | 0,171847695  | -0,490927335 | 0,662775031 |  |

|              |                  |              |              |             |  |
|--------------|------------------|--------------|--------------|-------------|--|
| 1560296_at   | -                | -0,83191556  | -1,494668682 | 0,662753122 |  |
| 1561318_at   | -                | -0,83191556  | -1,494668682 | 0,662753122 |  |
| 1562834_at   | -                | -0,83191556  | -1,494668682 | 0,662753122 |  |
| 1569608_x_at | -                | -0,83191556  | -1,494668682 | 0,662753122 |  |
| 204575_s_at  | MMP19            | -0,83191556  | -1,494668682 | 0,662753122 |  |
| 215315_at    | ZNF549           | -0,83191556  | -1,494668682 | 0,662753122 |  |
| 216774_at    | -                | -0,83191556  | -1,494668682 | 0,662753122 |  |
| 227578_at    | TMPO-AS1         | -0,83191556  | -1,494668682 | 0,662753122 |  |
| 240744_at    | CPA5             | -0,83191556  | -1,494668682 | 0,662753122 |  |
| 242261_at    | IREB2            | -0,83191556  | -1,494668682 | 0,662753122 |  |
| 244810_at    | -                | -0,83191556  | -1,494668682 | 0,662753122 |  |
| 227092_at    | LOC100507448     | 0,97328325   | 0,310717132  | 0,662566118 |  |
| 223608_at    | EFCAB2           | 2,338135744  | 1,675891488  | 0,662244256 |  |
| 227038_at    | SGMS2            | 0,911589958  | 0,249604176  | 0,661985783 |  |
| 208227_x_at  | ADAM22           | 0,20027154   | -0,461594427 | 0,661865966 |  |
| 229492_at    | VANGL1           | 0,20027154   | -0,461594427 | 0,661865966 |  |
| 232913_at    | TMED8            | 0,20027154   | -0,461594427 | 0,661865966 |  |
| 236920_at    | RHOXF2 /// RHO   | 0,20027154   | -0,461594427 | 0,661865966 |  |
| 241907_at    | -                | 0,20027154   | -0,461594427 | 0,661865966 |  |
| 212800_at    | STX6             | 1,079110292  | 0,417770464  | 0,661339829 |  |
| 1562449_s_at | LOC100506195     | 0,46522187   | -0,19610998  | 0,66133185  |  |
| 1555377_at   | OR4D2            | 0,376672223  | -0,283667828 | 0,660340051 |  |
| 208576_s_at  | HIST1H3A /// HIS | 0,376672223  | -0,283667828 | 0,660340051 |  |
| 216333_x_at  | TNXA /// TNXB    | 0,376672223  | -0,283667828 | 0,660340051 |  |
| 1560402_at   | GAS5             | 0,882651021  | 0,222599095  | 0,660051926 |  |
| 201289_at    | CYR61            | 3,503346991  | 2,843651104  | 0,659695887 |  |
| 239263_at    | LOC100506813     | 0,401366113  | -0,258114234 | 0,659480347 |  |
| 231036_at    | LOC100505774     | 0,123193849  | -0,536087151 | 0,659281    |  |
| 233854_x_at  | KLK4             | 0,123193849  | -0,536087151 | 0,659281    |  |
| 238613_at    | ZAK              | 0,123193849  | -0,536087151 | 0,659281    |  |
| 1558501_at   | DNM3             | -0,67289328  | -1,332017329 | 0,659124049 |  |
| 1564263_at   | LINC00330        | -0,67289328  | -1,332017329 | 0,659124049 |  |
| 215569_at    | GTF2IRD2B        | -0,67289328  | -1,332017329 | 0,659124049 |  |
| 223820_at    | RBP5             | -0,67289328  | -1,332017329 | 0,659124049 |  |
| 233730_at    | FAM135A          | -2,187914861 | -2,847001814 | 0,659086953 |  |
| 241238_at    | -                | -2,187914861 | -2,847001814 | 0,659086953 |  |
| 244441_at    | -                | -2,187914861 | -2,847001814 | 0,659086953 |  |
| 1555561_a_at | UGGT2            | -0,196756757 | -0,855751026 | 0,658994269 |  |
| 1561978_at   | LOC284798        | -0,196756757 | -0,855751026 | 0,658994269 |  |
| 229589_x_at  | BIVM             | -0,196756757 | -0,855751026 | 0,658994269 |  |
| 242530_at    | SV2C             | -0,196756757 | -0,855751026 | 0,658994269 |  |
| 1561860_at   | -                | -2,479842156 | -3,138626879 | 0,658784723 |  |
| 241120_s_at  | CDC20B           | -2,479842156 | -3,138626879 | 0,658784723 |  |
| 237034_at    | -                | 1,153678675  | 0,495031851  | 0,658646824 |  |
| 1566207_at   | TCEA1            | 1,011212064  | 0,352836757  | 0,658375307 |  |
| 223994_s_at  | SLC12A9          | 0,30867765   | -0,34958478  | 0,65826243  |  |
| 1566974_at   | -                | -0,496991414 | -1,154897679 | 0,657906265 |  |
| 222695_s_at  | AXIN2            | -0,496991414 | -1,154897679 | 0,657906265 |  |
| 210764_s_at  | CYR61            | 2,247975581  | 1,590454215  | 0,657521366 |  |
| 240598_at    | -                | 0,334552598  | -0,322870281 | 0,657422879 |  |
| 204865_at    | CA3              | -0,022466681 | -0,679763839 | 0,657297159 |  |
| 236726_at    | RGS6             | -0,022466681 | -0,679763839 | 0,657297159 |  |
| 223908_at    | HDAC8            | -0,352951799 | -1,010192375 | 0,657240577 |  |
| 228563_at    | GJC1             | -0,352951799 | -1,010192375 | 0,657240577 |  |
| 236991_at    | -                | -0,352951799 | -1,010192375 | 0,657240577 |  |
| 237875_at    | -                | -0,352951799 | -1,010192375 | 0,657240577 |  |

|              |              |              |              |             |  |
|--------------|--------------|--------------|--------------|-------------|--|
| 243079_x_at  | -            | -0,352951799 | -1,010192375 | 0,657240577 |  |
| 1563116_at   | -            | -1,964176657 | -2,621331989 | 0,657155333 |  |
| 1566767_at   | -            | -1,964176657 | -2,621331989 | 0,657155333 |  |
| 223775_at    | HHIP         | -1,964176657 | -2,621331989 | 0,657155333 |  |
| 226057_at    | ARHGAP31     | -1,964176657 | -2,621331989 | 0,657155333 |  |
| 229542_at    | C20orf85     | -1,964176657 | -2,621331989 | 0,657155333 |  |
| 236850_at    | CAPRIN1      | -1,964176657 | -2,621331989 | 0,657155333 |  |
| 237758_at    | LOC100505685 | -1,964176657 | -2,621331989 | 0,657155333 |  |
| 241848_x_at  | -            | -1,964176657 | -2,621331989 | 0,657155333 |  |
| 242381_x_at  | -            | -1,964176657 | -2,621331989 | 0,657155333 |  |
| 244276_at    | KLB          | -1,964176657 | -2,621331989 | 0,657155333 |  |
| 228955_at    | LRP8         | 1,348276312  | 0,691645685  | 0,656630626 |  |
| 242235_x_at  | -            | 1,360921491  | 0,704715219  | 0,656206272 |  |
| 1555168_a_at | CALN1        | -1,131062212 | -1,787089803 | 0,656027591 |  |
| 1559964_at   | FLJ38717     | -1,131062212 | -1,787089803 | 0,656027591 |  |
| 1566093_at   | ARHGEF12     | -1,131062212 | -1,787089803 | 0,656027591 |  |
| 207084_at    | POU3F2       | -1,131062212 | -1,787089803 | 0,656027591 |  |
| 209897_s_at  | SLIT2        | -1,131062212 | -1,787089803 | 0,656027591 |  |
| 215777_at    | -            | -1,131062212 | -1,787089803 | 0,656027591 |  |
| 220364_at    | FLJ11235     | -1,131062212 | -1,787089803 | 0,656027591 |  |
| 236102_at    | LOC100126784 | -1,131062212 | -1,787089803 | 0,656027591 |  |
| 238008_at    | PRR18        | -1,131062212 | -1,787089803 | 0,656027591 |  |
| 206029_at    | ANKRD1       | -0,394749123 | -1,050406615 | 0,655657492 |  |
| 218651_s_at  | LARP6        | -0,394749123 | -1,050406615 | 0,655657492 |  |
| 213114_at    | -            | 0,518867317  | -0,136643983 | 0,6555113   |  |
| 235775_at    | TMTC2        | 0,518867317  | -0,136643983 | 0,6555113   |  |
| 208030_s_at  | ADD1         | 3,484209953  | 2,828804976  | 0,655404977 |  |
| 1554019_s_at | CEP57L1      | 0,457392764  | -0,19610998  | 0,653502744 |  |
| 240651_at    | -            | 0,457392764  | -0,19610998  | 0,653502744 |  |
| 1553629_a_at | FAM71B       | -0,888496123 | -1,541908042 | 0,653411919 |  |
| 1556309_s_at | C1orf86      | -0,888496123 | -1,541908042 | 0,653411919 |  |
| 1570625_at   | TCEB3        | -0,888496123 | -1,541908042 | 0,653411919 |  |
| 205656_at    | PCDH17       | -0,888496123 | -1,541908042 | 0,653411919 |  |
| 210367_s_at  | PTGES        | -0,888496123 | -1,541908042 | 0,653411919 |  |
| 211411_at    | -            | -0,888496123 | -1,541908042 | 0,653411919 |  |
| 215394_at    | PIK3C3       | -0,888496123 | -1,541908042 | 0,653411919 |  |
| 221299_at    | GPR173       | -0,888496123 | -1,541908042 | 0,653411919 |  |
| 231516_at    | LOC100507146 | -0,888496123 | -1,541908042 | 0,653411919 |  |
| 234175_at    | -            | -0,888496123 | -1,541908042 | 0,653411919 |  |
| 234564_at    | -            | -0,888496123 | -1,541908042 | 0,653411919 |  |
| 234886_at    | -            | -0,888496123 | -1,541908042 | 0,653411919 |  |
| 240999_at    | LOC100287704 | -0,888496123 | -1,541908042 | 0,653411919 |  |
| 1552705_at   | DUSP19       | -2,236765673 | -2,89013181  | 0,653366137 |  |
| 1563771_a_at | -            | -2,236765673 | -2,89013181  | 0,653366137 |  |
| 1567986_at   | -            | -2,236765673 | -2,89013181  | 0,653366137 |  |
| 205363_at    | BBOX1        | -2,236765673 | -2,89013181  | 0,653366137 |  |
| 220622_at    | LRRC31       | -2,236765673 | -2,89013181  | 0,653366137 |  |
| 240695_at    | -            | -2,236765673 | -2,89013181  | 0,653366137 |  |
| 241832_at    | FAM98A       | -2,236765673 | -2,89013181  | 0,653366137 |  |
| 242392_at    | UBE2U        | -2,236765673 | -2,89013181  | 0,653366137 |  |
| 206359_at    | SOCS3        | -1,308181863 | -1,961547147 | 0,653365284 |  |
| 210164_at    | GZMB         | -1,308181863 | -1,961547147 | 0,653365284 |  |
| 217259_at    | -            | -1,308181863 | -1,961547147 | 0,653365284 |  |
| 228586_at    | -            | -1,308181863 | -1,961547147 | 0,653365284 |  |
| 228656_at    | PROX1        | -1,308181863 | -1,961547147 | 0,653365284 |  |
| 235973_at    | -            | -1,308181863 | -1,961547147 | 0,653365284 |  |

|             |                  |              |              |             |  |
|-------------|------------------|--------------|--------------|-------------|--|
| 235988_at   | GPR110           | -1,308181863 | -1,961547147 | 0,653365284 |  |
| 240851_at   | -                | -1,308181863 | -1,961547147 | 0,653365284 |  |
| 214590_s_at | UBE2D1           | -0,112808516 | -0,765504029 | 0,652695512 |  |
| 223840_s_at | SPATA9           | -2,384869671 | -3,037500868 | 0,652631197 |  |
| 233126_s_at | OLAH             | -2,384869671 | -3,037500868 | 0,652631197 |  |
| 234600_at   | -                | -2,384869671 | -3,037500868 | 0,652631197 |  |
| 235947_at   | -                | -2,384869671 | -3,037500868 | 0,652631197 |  |
| 207914_x_at | EVX1             | -0,078265071 | -0,730778808 | 0,652513737 |  |
| 209133_s_at | COMMD4           | -0,078265071 | -0,730778808 | 0,652513737 |  |
| 228518_at   | IGHG1 /// IGHM   | -0,078265071 | -0,730778808 | 0,652513737 |  |
| 1559478_at  | -                | -0,259832361 | -0,912331589 | 0,652499228 |  |
| 1562586_at  | -                | -0,259832361 | -0,912331589 | 0,652499228 |  |
| 1570347_at  | MLX              | -0,259832361 | -0,912331589 | 0,652499228 |  |
| 213401_s_at | TBL1X            | -0,259832361 | -0,912331589 | 0,652499228 |  |
| 235108_at   | KCNK3            | -0,259832361 | -0,912331589 | 0,652499228 |  |
| 208958_at   | ERP44            | -0,299034815 | -0,950686014 | 0,6516512   |  |
| 218934_s_at | HSPB7            | -0,299034815 | -0,950686014 | 0,6516512   |  |
| 219294_at   | CENPQ            | 2,194816625  | 1,543943227  | 0,650873398 |  |
| 239143_x_at | RNF138           | 2,247975581  | 1,59747851   | 0,650497071 |  |
| 216017_s_at | NAB2             | 0,57058931   | -0,079522948 | 0,650112258 |  |
| 228634_s_at | CSDA             | 0,083054335  | -0,566887459 | 0,649941794 |  |
| 231919_at   | DBT              | 0,083054335  | -0,566887459 | 0,649941794 |  |
| 204106_at   | TESK1            | 1,027166904  | 0,377530647  | 0,649636258 |  |
| 222459_at   | AKIRIN1          | 4,313236089  | 3,663961904  | 0,649274185 |  |
| 223292_s_at | MRPS15           | 0,728550685  | 0,079428135  | 0,64912255  |  |
| 207553_at   | OPRK1            | -1,089016378 | -1,738067356 | 0,649050978 |  |
| 210436_at   | CCT8             | -1,089016378 | -1,738067356 | 0,649050978 |  |
| 214880_x_at | CALD1            | -1,089016378 | -1,738067356 | 0,649050978 |  |
| 219851_at   | ZNF613           | -1,089016378 | -1,738067356 | 0,649050978 |  |
| 221422_s_at | MIR600 /// MIR60 | -1,089016378 | -1,738067356 | 0,649050978 |  |
| 223127_s_at | C1orf21          | -1,089016378 | -1,738067356 | 0,649050978 |  |
| 230060_at   | CDCA7            | -1,089016378 | -1,738067356 | 0,649050978 |  |
| 230854_at   | BCAR4            | -1,089016378 | -1,738067356 | 0,649050978 |  |
| 233403_x_at | TM6SF2           | -1,089016378 | -1,738067356 | 0,649050978 |  |
| 236417_at   | -                | -1,089016378 | -1,738067356 | 0,649050978 |  |
| 236810_at   | -                | -1,089016378 | -1,738067356 | 0,649050978 |  |
| 240566_at   | -                | -1,089016378 | -1,738067356 | 0,649050978 |  |
| 244361_at   | -                | -1,089016378 | -1,738067356 | 0,649050978 |  |
| 228835_at   | -                | 0,87091093   | 0,222599095  | 0,648311835 |  |
| 231011_at   | LARP1B           | 0,67554678   | 0,028364014  | 0,647182766 |  |
| 215452_x_at | SUMO4            | 4,234684448  | 3,587527995  | 0,647156453 |  |
| 1561354_at  | -                | -1,639579028 | -2,286583451 | 0,647004422 |  |
| 1561670_at  | -                | -1,639579028 | -2,286583451 | 0,647004422 |  |
| 1562979_at  | -                | -1,639579028 | -2,286583451 | 0,647004422 |  |
| 234043_at   | -                | -1,639579028 | -2,286583451 | 0,647004422 |  |
| 235098_at   | PEX26            | -1,639579028 | -2,286583451 | 0,647004422 |  |
| 236668_at   | -                | -1,639579028 | -2,286583451 | 0,647004422 |  |
| 240552_at   | -                | -1,639579028 | -2,286583451 | 0,647004422 |  |
| 241123_at   | -                | -1,639579028 | -2,286583451 | 0,647004422 |  |
| 1569044_at  | CDC42BPG         | -1,688127507 | -2,335104118 | 0,646976611 |  |
| 207325_x_at | MAGEA1           | -1,688127507 | -2,335104118 | 0,646976611 |  |
| 207800_at   | AKAP5            | -1,688127507 | -2,335104118 | 0,646976611 |  |
| 215917_at   | RAD21L1          | -1,688127507 | -2,335104118 | 0,646976611 |  |
| 217204_at   | MTRF1L           | -1,688127507 | -2,335104118 | 0,646976611 |  |
| 220831_at   | GCNT4            | -1,688127507 | -2,335104118 | 0,646976611 |  |
| 230757_at   | -                | -1,688127507 | -2,335104118 | 0,646976611 |  |

|              |                 |              |              |             |  |
|--------------|-----------------|--------------|--------------|-------------|--|
| 234166_at    | UBE3A           | -1,688127507 | -2,335104118 | 0,646976611 |  |
| 234689_at    | PTCHD4          | -1,688127507 | -2,335104118 | 0,646976611 |  |
| 244275_at    | CISD2           | -1,688127507 | -2,335104118 | 0,646976611 |  |
| 1566136_at   | -               | -0,172274514 | -0,819238336 | 0,646963822 |  |
| 203509_at    | SORL1           | -0,172274514 | -0,819238336 | 0,646963822 |  |
| 1570402_at   | KLC3            | 0,822971223  | 0,176436073  | 0,64653515  |  |
| 221765_at    | UGCG            | 1,481627361  | 0,835239052  | 0,646388309 |  |
| 1560542_at   | MCM3AP-AS1      | -2,089474779 | -2,735862426 | 0,646387647 |  |
| 220493_at    | DMRT1           | -2,089474779 | -2,735862426 | 0,646387647 |  |
| 233954_at    | HIATL1          | -2,089474779 | -2,735862426 | 0,646387647 |  |
| 239380_at    | C5orf27         | -2,089474779 | -2,735862426 | 0,646387647 |  |
| 204876_at    | ZNF646          | -0,033456564 | -0,679763839 | 0,646307275 |  |
| 205846_at    | PTPRB           | -0,033456564 | -0,679763839 | 0,646307275 |  |
| 210673_x_at  | NKX2-1          | -0,033456564 | -0,679763839 | 0,646307275 |  |
| 224424_x_at  | ACTR3BP2 /// AC | -0,033456564 | -0,679763839 | 0,646307275 |  |
| 227336_at    | DTX1            | -0,033456564 | -0,679763839 | 0,646307275 |  |
| 1566145_s_at | LOC644450       | -0,00073712  | -0,646746079 | 0,646008958 |  |
| 232293_at    | LCORL           | 1,063722698  | 0,417770464  | 0,645952234 |  |
| 221987_s_at  | TSR1            | 3,262904562  | 2,617011906  | 0,645892656 |  |
| 1557827_at   | DNAJC9-AS1      | -0,467091869 | -1,112851844 | 0,645759975 |  |
| 243861_at    | -               | -0,467091869 | -1,112851844 | 0,645759975 |  |
| 206785_s_at  | KLRC1 /// KLRC2 | -0,57445847  | -1,220210588 | 0,645752118 |  |
| 214178_s_at  | SOX2            | -0,57445847  | -1,220210588 | 0,645752118 |  |
| 215927_at    | ARFGEF2         | -0,57445847  | -1,220210588 | 0,645752118 |  |
| 219901_at    | FGD6            | -0,57445847  | -1,220210588 | 0,645752118 |  |
| 223874_at    | ACTR3C          | -0,57445847  | -1,220210588 | 0,645752118 |  |
| 235805_at    | -               | -0,57445847  | -1,220210588 | 0,645752118 |  |
| 242887_at    | KCMF1           | -0,57445847  | -1,220210588 | 0,645752118 |  |
| 228474_s_at  | KLF9            | 0,03125738   | -0,614371577 | 0,645628957 |  |
| 1552952_at   | RBMV2FP         | -1,763254337 | -2,408705138 | 0,645450801 |  |
| 1553736_at   | ZFC3H1          | -1,763254337 | -2,408705138 | 0,645450801 |  |
| 1560222_at   | -               | -1,763254337 | -2,408705138 | 0,645450801 |  |
| 1566688_at   | -               | -1,763254337 | -2,408705138 | 0,645450801 |  |
| 1568888_at   | LOC100507283    | -1,763254337 | -2,408705138 | 0,645450801 |  |
| 1569954_at   | -               | -1,763254337 | -2,408705138 | 0,645450801 |  |
| 226814_at    | ADAMTS9         | -1,763254337 | -2,408705138 | 0,645450801 |  |
| 230014_at    | -               | -1,763254337 | -2,408705138 | 0,645450801 |  |
| 240245_at    | -               | -1,763254337 | -2,408705138 | 0,645450801 |  |
| 1558473_at   | -               | -1,518072576 | -2,162639771 | 0,644567196 |  |
| 213094_at    | GPR126          | -1,518072576 | -2,162639771 | 0,644567196 |  |
| 214277_at    | COX11           | -1,518072576 | -2,162639771 | 0,644567196 |  |
| 216979_at    | NR4A3           | -1,518072576 | -2,162639771 | 0,644567196 |  |
| 220695_at    | -               | -1,518072576 | -2,162639771 | 0,644567196 |  |
| 233794_at    | -               | -1,518072576 | -2,162639771 | 0,644567196 |  |
| 234666_at    | -               | -1,518072576 | -2,162639771 | 0,644567196 |  |
| 235283_at    | INTS6           | -1,518072576 | -2,162639771 | 0,644567196 |  |
| 243792_x_at  | PTPN13          | -1,518072576 | -2,162639771 | 0,644567196 |  |
| 1566804_at   | -               | -1,812418401 | -2,456406426 | 0,643988025 |  |
| 211163_s_at  | TNFRSF10C       | -1,812418401 | -2,456406426 | 0,643988025 |  |
| 217013_at    | AZGP1P1         | -1,812418401 | -2,456406426 | 0,643988025 |  |
| 222344_at    | -               | -1,812418401 | -2,456406426 | 0,643988025 |  |
| 231786_at    | HOXA13          | -1,812418401 | -2,456406426 | 0,643988025 |  |
| 232695_at    | KIF6            | -1,812418401 | -2,456406426 | 0,643988025 |  |
| 242325_at    | YWHAH           | -1,812418401 | -2,456406426 | 0,643988025 |  |
| 210926_at    | POTEKP          | 1,968405881  | 1,324440845  | 0,643965036 |  |
| 1552334_at   | TRIOBP          | -0,85085127  | -1,494668682 | 0,643817412 |  |

|              |                 |              |              |             |  |
|--------------|-----------------|--------------|--------------|-------------|--|
| 1562772_a_at | DAND5           | -0,85085127  | -1,494668682 | 0,643817412 |  |
| 208199_s_at  | ZFP161          | -0,85085127  | -1,494668682 | 0,643817412 |  |
| 208274_at    | OCLM            | -0,85085127  | -1,494668682 | 0,643817412 |  |
| 214267_s_at  | CADM4           | -0,85085127  | -1,494668682 | 0,643817412 |  |
| 216137_s_at  | MAPK8IP3        | -0,85085127  | -1,494668682 | 0,643817412 |  |
| 220541_at    | MMP26           | -0,85085127  | -1,494668682 | 0,643817412 |  |
| 233643_at    | FAM86B1 /// FAM | -0,85085127  | -1,494668682 | 0,643817412 |  |
| 243443_at    | PPME1           | -0,85085127  | -1,494668682 | 0,643817412 |  |
| 207220_at    | ART4            | 0,359971644  | -0,283667828 | 0,643639471 |  |
| 227751_at    | PDCD5           | 1,593009234  | 0,949447784  | 0,64356145  |  |
| 213529_at    | ZNF688          | -0,366776884 | -1,010192375 | 0,643415491 |  |
| 214164_x_at  | CA12            | -0,366776884 | -1,010192375 | 0,643415491 |  |
| 230535_s_at  | ATP5E           | -0,366776884 | -1,010192375 | 0,643415491 |  |
| 230662_at    | RNF187          | -0,366776884 | -1,010192375 | 0,643415491 |  |
| 234883_x_at  | -               | -0,366776884 | -1,010192375 | 0,643415491 |  |
| 243553_x_at  | TRAF3IP2-AS1    | -0,366776884 | -1,010192375 | 0,643415491 |  |
| 233423_at    | KIAA1609        | -2,311268652 | -2,954576755 | 0,643308104 |  |
| 240601_at    | -               | -2,311268652 | -2,954576755 | 0,643308104 |  |
| 241057_x_at  | -               | -2,311268652 | -2,954576755 | 0,643308104 |  |
| 236906_x_at  | IPO5            | 0,702292136  | 0,059218869  | 0,643073268 |  |
| 208037_s_at  | MADCAM1         | 0,384950573  | -0,258114234 | 0,643064807 |  |
| 1552410_at   | CLEC4F          | 0,181384709  | -0,461594427 | 0,642979136 |  |
| 220412_x_at  | KCNK7           | 0,181384709  | -0,461594427 | 0,642979136 |  |
| 230769_at    | DENND2C         | 0,181384709  | -0,461594427 | 0,642979136 |  |
| 240576_at    | TBC1D26 /// ZNF | 0,181384709  | -0,461594427 | 0,642979136 |  |
| 1552928_s_at | TAB3            | -0,512251684 | -1,154897679 | 0,642645994 |  |
| 235148_at    | KRTCAP3         | -0,512251684 | -1,154897679 | 0,642645994 |  |
| 238023_at    | -               | -0,512251684 | -1,154897679 | 0,642645994 |  |
| 231146_at    | FAM24B          | 2,675004741  | 2,032717854  | 0,642286888 |  |
| 210568_s_at  | RECQL           | 1,795990708  | 1,153866761  | 0,642123946 |  |
| 1560821_at   | ARHGAP22        | -2,138804305 | -2,780313924 | 0,641509619 |  |
| 1565613_at   | -               | -2,138804305 | -2,780313924 | 0,641509619 |  |
| 217384_x_at  | IGHV3-48        | -2,138804305 | -2,780313924 | 0,641509619 |  |
| 220828_s_at  | FLJ11292        | -2,138804305 | -2,780313924 | 0,641509619 |  |
| 235356_at    | NHLRC2          | -2,138804305 | -2,780313924 | 0,641509619 |  |
| 238364_x_at  | GLI4            | -2,138804305 | -2,780313924 | 0,641509619 |  |
| 243566_at    | LOC100506238    | -2,138804305 | -2,780313924 | 0,641509619 |  |
| 207488_at    | -               | -0,622910612 | -1,264005341 | 0,641094728 |  |
| 215426_at    | ZCCHC14         | -0,622910612 | -1,264005341 | 0,641094728 |  |
| 223603_at    | RNF112          | -0,622910612 | -1,264005341 | 0,641094728 |  |
| 244020_at    | -               | -0,622910612 | -1,264005341 | 0,641094728 |  |
| 225721_at    | SYNPO2          | -0,089689931 | -0,730778808 | 0,641088877 |  |
| 232048_at    | FAM76B          | 0,648296226  | 0,007421914  | 0,640874312 |  |
| 205762_s_at  | DUS4L           | 0,291166226  | -0,34958478  | 0,640751006 |  |
| 217541_x_at  | ZNF816 /// ZNF8 | 0,291166226  | -0,34958478  | 0,640751006 |  |
| 216380_x_at  | -               | 3,986661073  | 3,346162854  | 0,640498219 |  |
| 226704_at    | UBE2J2          | 0,072842263  | -0,566887459 | 0,639729722 |  |
| 1558557_at   | C16orf62        | -2,597496523 | -3,236070201 | 0,638573678 |  |
| 237904_at    | -               | -2,597496523 | -3,236070201 | 0,638573678 |  |
| 218502_s_at  | TRPS1           | 0,592200562  | -0,046302147 | 0,638502708 |  |
| 1552908_at   | C1orf150        | 0,767063567  | 0,128747141  | 0,638316426 |  |
| 216302_at    | HNRNPCL1 /// LC | 0,767063567  | 0,128747141  | 0,638316426 |  |
| 234859_at    | PLXNA4          | 0,417596971  | -0,220592223 | 0,638189194 |  |
| 223263_s_at  | FGFR10P2        | 1,296557217  | 0,658444279  | 0,638112938 |  |
| 1552842_at   | HS6ST3 /// LOC1 | -1,399512875 | -2,037551727 | 0,638038851 |  |
| 1554295_x_at | TTBK2           | -1,399512875 | -2,037551727 | 0,638038851 |  |



|              |                  |              |              |             |  |
|--------------|------------------|--------------|--------------|-------------|--|
| 1566874_at   | -                | -1,399512875 | -2,037551727 | 0,638038851 |  |
| 1569833_at   | -                | -1,399512875 | -2,037551727 | 0,638038851 |  |
| 200878_at    | EPAS1 /// LOC10  | -1,399512875 | -2,037551727 | 0,638038851 |  |
| 214465_at    | ORM1 /// ORM2    | -1,399512875 | -2,037551727 | 0,638038851 |  |
| 219612_s_at  | FGG              | -1,399512875 | -2,037551727 | 0,638038851 |  |
| 223897_at    | ZNF765           | -1,399512875 | -2,037551727 | 0,638038851 |  |
| 242258_at    | -                | -1,399512875 | -2,037551727 | 0,638038851 |  |
| 243445_at    | BNC2             | -1,399512875 | -2,037551727 | 0,638038851 |  |
| 227444_at    | ARMCX4           | 1,191926657  | 0,553993624  | 0,637933032 |  |
| 224971_at    | C2orf15 /// MRPL | 4,173278271  | 3,535445117  | 0,637833154 |  |
| 1556414_at   | LINC00515        | -1,937711681 | -2,575129729 | 0,637418048 |  |
| 1563389_at   | LOC100506030     | -1,937711681 | -2,575129729 | 0,637418048 |  |
| 210687_at    | CPT1A            | -1,937711681 | -2,575129729 | 0,637418048 |  |
| 222188_at    | C9orf156         | -1,937711681 | -2,575129729 | 0,637418048 |  |
| 242976_at    | -                | -1,937711681 | -2,575129729 | 0,637418048 |  |
| 244531_at    | NNT              | -1,937711681 | -2,575129729 | 0,637418048 |  |
| 1554290_at   | HERC3            | -2,359436556 | -2,996335703 | 0,636899147 |  |
| 1570534_a_at | ZNF483           | -2,359436556 | -2,996335703 | 0,636899147 |  |
| 1552637_at   | PTPN11           | -1,026571149 | -1,663414495 | 0,636843346 |  |
| 1553447_at   | AGBL1            | -1,026571149 | -1,663414495 | 0,636843346 |  |
| 1555277_a_at | SLC4A5           | -1,026571149 | -1,663414495 | 0,636843346 |  |
| 211659_at    | GPR135           | -1,026571149 | -1,663414495 | 0,636843346 |  |
| 222081_at    | SIRT5            | -1,026571149 | -1,663414495 | 0,636843346 |  |
| 231064_s_at  | -                | -1,026571149 | -1,663414495 | 0,636843346 |  |
| 232782_at    | -                | -1,026571149 | -1,663414495 | 0,636843346 |  |
| 235684_s_at  | SESN3            | -1,026571149 | -1,663414495 | 0,636843346 |  |
| 244496_at    | -                | -1,026571149 | -1,663414495 | 0,636843346 |  |
| 244572_at    | KY               | -1,026571149 | -1,663414495 | 0,636843346 |  |
| 225726_s_at  | PLEKHH1          | 0,859074518  | 0,222599095  | 0,636475424 |  |
| 1554625_at   | BCL6B            | 0,695652136  | 0,059218869  | 0,636433268 |  |
| 224441_s_at  | USP45            | 0,715481152  | 0,079428135  | 0,636053016 |  |
| 211671_s_at  | NR3C1            | 3,078700536  | 2,442710777  | 0,635989759 |  |
| 40524_at     | PTPN21           | -1,612820892 | -2,248681741 | 0,635860849 |  |
| 218929_at    | CDKN2AIP         | 2,344516784  | 1,708698295  | 0,635818489 |  |
| 1559169_at   | LOC100507013     | -0,741668563 | -1,377419394 | 0,635750831 |  |
| 1563512_at   | NOS1AP           | -0,741668563 | -1,377419394 | 0,635750831 |  |
| 205612_at    | MMRN1            | -0,741668563 | -1,377419394 | 0,635750831 |  |
| 206215_at    | OPCML            | -0,741668563 | -1,377419394 | 0,635750831 |  |
| 214846_s_at  | ALPK3            | -0,741668563 | -1,377419394 | 0,635750831 |  |
| 219842_at    | ARL15            | -0,741668563 | -1,377419394 | 0,635750831 |  |
| 224388_s_at  | COL25A1          | -0,741668563 | -1,377419394 | 0,635750831 |  |
| 230684_at    | GTPBP10          | -0,741668563 | -1,377419394 | 0,635750831 |  |
| 237048_at    | -                | 0,555999837  | -0,079522948 | 0,635522785 |  |
| 230185_at    | THAP9            | 0,928678725  | 0,293518836  | 0,635159889 |  |
| 201069_at    | MMP2             | 0,376672223  | -0,258114234 | 0,634786457 |  |
| 212575_at    | C19orf6          | 1,129248302  | 0,495031851  | 0,634216451 |  |
| 235338_s_at  | SETDB2           | 1,390002893  | 0,755840599  | 0,634162294 |  |
| 219154_at    | TMEM120B         | -0,221656139 | -0,855751026 | 0,634094888 |  |
| 227683_x_at  | NUDT4            | -0,221656139 | -0,855751026 | 0,634094888 |  |
| 228251_at    | UBXN6            | -0,221656139 | -0,855751026 | 0,634094888 |  |
| 243537_at    | -                | -0,221656139 | -0,855751026 | 0,634094888 |  |
| 231674_at    | -                | -2,504600601 | -3,138626879 | 0,634026278 |  |
| 232325_at    | -                | -2,504600601 | -3,138626879 | 0,634026278 |  |
| 219482_at    | SETD4            | 1,305306849  | 0,67181667   | 0,633490179 |  |
| 206929_s_at  | NFIC             | 0,171847695  | -0,461594427 | 0,633442122 |  |
| 239525_at    | CTTNBP2NL        | 0,171847695  | -0,461594427 | 0,633442122 |  |

|              |                  |              |              |             |  |
|--------------|------------------|--------------|--------------|-------------|--|
| 206469_x_at  | AKR7A3           | 1,027166904  | 0,393761504  | 0,6334054   |  |
| 1553244_at   | FANCB            | 0,882651021  | 0,249604176  | 0,633046845 |  |
| 216114_at    | NCKIPSD          | 0,496120222  | -0,136643983 | 0,632764205 |  |
| 202769_at    | CCNG2            | 3,167755526  | 2,53523821   | 0,632517316 |  |
| 235432_at    | NPHP3            | 0,760715727  | 0,128747141  | 0,631968586 |  |
| 241285_at    | -                | 0,30867765   | -0,322870281 | 0,631547931 |  |
| 232950_s_at  | PITPNM2          | 1,063722698  | 0,433557298  | 0,6301654   |  |
| 217473_x_at  | SLC11A1          | 1,233777334  | 0,603679647  | 0,630097687 |  |
| 214835_s_at  | SUCLG2           | 2,901063789  | 2,271023131  | 0,630040658 |  |
| 205524_s_at  | HAPLN1           | -0,59053611  | -1,220210588 | 0,629674477 |  |
| 210341_at    | MYT1             | -0,59053611  | -1,220210588 | 0,629674477 |  |
| 224461_s_at  | AIFM2            | -0,59053611  | -1,220210588 | 0,629674477 |  |
| 226494_at    | CAMSAP3          | -0,59053611  | -1,220210588 | 0,629674477 |  |
| 231893_at    | KIAA1755         | -0,59053611  | -1,220210588 | 0,629674477 |  |
| 236593_at    | -                | -0,59053611  | -1,220210588 | 0,629674477 |  |
| 243437_at    | GCC1             | -0,59053611  | -1,220210588 | 0,629674477 |  |
| 225872_at    | SLC35F5          | 3,769898242  | 3,140317145  | 0,629581097 |  |
| 213548_s_at  | CDV3             | 2,254767157  | 1,6252386    | 0,629528557 |  |
| 1561762_s_at | -                | -0,136301282 | -0,765504029 | 0,629202747 |  |
| 206371_at    | FOLR3            | -0,136301282 | -0,765504029 | 0,629202747 |  |
| 238396_at    | -                | -0,136301282 | -0,765504029 | 0,629202747 |  |
| 204222_s_at  | GLIPR1           | 1,709647566  | 1,080561626  | 0,62908594  |  |
| 1569583_at   | EREG             | -0,986356909 | -1,615132408 | 0,628775499 |  |
| 213962_s_at  | ANKLE2           | -0,986356909 | -1,615132408 | 0,628775499 |  |
| 219252_s_at  | GEMIN8           | -0,986356909 | -1,615132408 | 0,628775499 |  |
| 221885_at    | DENND2A          | -0,986356909 | -1,615132408 | 0,628775499 |  |
| 236257_at    | CD2AP            | -0,986356909 | -1,615132408 | 0,628775499 |  |
| 237486_at    | -                | -0,986356909 | -1,615132408 | 0,628775499 |  |
| 238759_at    | CCDC88A          | -0,986356909 | -1,615132408 | 0,628775499 |  |
| 244219_at    | -                | -0,986356909 | -1,615132408 | 0,628775499 |  |
| 208762_at    | SUMO1            | 1,965648824  | 1,337086025  | 0,628562799 |  |
| 204516_at    | ATXN7            | 2,243430036  | 1,614891062  | 0,628538975 |  |
| 238290_at    | -                | 0,209623097  | -0,41858459  | 0,628207687 |  |
| 202027_at    | TMEM184B         | 2,586251598  | 1,958277216  | 0,627974382 |  |
| 1558450_at   | A2M              | -0,79540287  | -1,423348341 | 0,627945471 |  |
| 1561392_at   | -                | -0,79540287  | -1,423348341 | 0,627945471 |  |
| 222295_x_at  | -                | -0,79540287  | -1,423348341 | 0,627945471 |  |
| 237320_at    | FAM71F2          | -0,79540287  | -1,423348341 | 0,627945471 |  |
| 1552740_at   | C2orf15 /// MRPL | -2,063149277 | -2,690860744 | 0,627711466 |  |
| 1552899_at   | MGC34034         | -2,063149277 | -2,690860744 | 0,627711466 |  |
| 1554889_at   | TIA1             | -2,063149277 | -2,690860744 | 0,627711466 |  |
| 1556204_a_at | LOC100506523 /   | -2,063149277 | -2,690860744 | 0,627711466 |  |
| 205765_at    | CYP3A5           | -2,063149277 | -2,690860744 | 0,627711466 |  |
| 217669_s_at  | AKAP6            | -2,063149277 | -2,690860744 | 0,627711466 |  |
| 1563612_at   | -                | -1,2845686   | -1,912089812 | 0,627521212 |  |
| 208455_at    | PVRL1            | -1,2845686   | -1,912089812 | 0,627521212 |  |
| 213732_at    | TCF3             | -1,2845686   | -1,912089812 | 0,627521212 |  |
| 236459_at    | PRKCE            | -1,2845686   | -1,912089812 | 0,627521212 |  |
| 237120_at    | KRT77            | -1,2845686   | -1,912089812 | 0,627521212 |  |
| 238211_at    | LOC643714        | -1,2845686   | -1,912089812 | 0,627521212 |  |
| 239255_at    | -                | -1,2845686   | -1,912089812 | 0,627521212 |  |
| 1556834_at   | LOC100652770     | -2,262747984 | -2,89013181  | 0,627383826 |  |
| 1560147_at   | WDR86-AS1        | -2,262747984 | -2,89013181  | 0,627383826 |  |
| 216814_at    | -                | -2,262747984 | -2,89013181  | 0,627383826 |  |
| 238705_at    | -                | -2,262747984 | -2,89013181  | 0,627383826 |  |
| 241856_at    | IMPG2            | -2,262747984 | -2,89013181  | 0,627383826 |  |

|              |                |              |              |             |  |
|--------------|----------------|--------------|--------------|-------------|--|
| 240803_at    | -              | -0,423248115 | -1,050406615 | 0,6271585   |  |
| 242624_at    | ABLM2          | -0,423248115 | -1,050406615 | 0,6271585   |  |
| 224027_at    | CCL28          | -2,551294263 | -3,177802286 | 0,626508023 |  |
| 214701_s_at  | FN1            | -0,285837228 | -0,912331589 | 0,626494361 |  |
| 220576_at    | PGAP1          | -0,285837228 | -0,912331589 | 0,626494361 |  |
| 236441_at    | -              | -0,285837228 | -0,912331589 | 0,626494361 |  |
| 202843_at    | DNAJB9         | 1,655931423  | 1,029536893  | 0,62639453  |  |
| 211220_s_at  | HSF2           | 1,381753566  | 0,755840599  | 0,625912967 |  |
| 217921_at    | MAN1A2         | 0,46522187   | -0,160136748 | 0,625358619 |  |
| 219774_at    | CCDC93         | 0,46522187   | -0,160136748 | 0,625358619 |  |
| 1557589_a_at | -              | -0,706943342 | -1,332017329 | 0,625073987 |  |
| 209483_s_at  | NSL1           | -0,706943342 | -1,332017329 | 0,625073987 |  |
| 211113_s_at  | ABCG1          | -0,706943342 | -1,332017329 | 0,625073987 |  |
| 223537_s_at  | WNT5B          | -0,706943342 | -1,332017329 | 0,625073987 |  |
| 227532_at    | LRRC39         | -0,706943342 | -1,332017329 | 0,625073987 |  |
| 227795_at    | NDUFV1         | -0,706943342 | -1,332017329 | 0,625073987 |  |
| 236425_at    | -              | -0,706943342 | -1,332017329 | 0,625073987 |  |
| 240169_at    | -              | -0,706943342 | -1,332017329 | 0,625073987 |  |
| 232249_at    | FMNL3          | -0,325749314 | -0,950686014 | 0,6249367   |  |
| 236546_at    | POLA2          | -0,325749314 | -0,950686014 | 0,6249367   |  |
| 218525_s_at  | HIF1AN         | 1,940595304  | 1,315948728  | 0,624646576 |  |
| 1570315_at   | HTA            | -0,022466681 | -0,646746079 | 0,624279398 |  |
| 202091_at    | LOC100652989 / | -0,022466681 | -0,646746079 | 0,624279398 |  |
| 214133_at    | MUC6           | -0,022466681 | -0,646746079 | 0,624279398 |  |
| 219340_s_at  | CLN8           | 1,62481334   | 1,000684521  | 0,624128819 |  |
| 238071_at    | LCN10 /// LCN6 | -0,055687482 | -0,679763839 | 0,624076357 |  |
| 214666_x_at  | IREB2          | 1,360921491  | 0,73688026   | 0,624041231 |  |
| 211305_x_at  | FCAR           | 0,133056859  | -0,490927335 | 0,623984194 |  |
| 232240_at    | DNHD1          | 0,273439642  | -0,34958478  | 0,623024422 |  |
| 230604_at    | -              | 0,702292136  | 0,079428135  | 0,622864001 |  |
| 205442_at    | MFAP3L         | 1,859746653  | 1,23718272   | 0,622563933 |  |
| 224548_at    | HES7           | -0,196756757 | -0,819238336 | 0,622481579 |  |
| 235331_x_at  | PCGF5          | -0,196756757 | -0,819238336 | 0,622481579 |  |
| 1554364_at   | PPP2R5C        | -1,240169874 | -1,862647763 | 0,622477888 |  |
| 1555898_at   | ANKRD36C       | -1,240169874 | -1,862647763 | 0,622477888 |  |
| 1559109_a_at | VPS53          | -1,240169874 | -1,862647763 | 0,622477888 |  |
| 1561194_at   | -              | -1,240169874 | -1,862647763 | 0,622477888 |  |
| 210117_at    | SPAG1          | -1,240169874 | -1,862647763 | 0,622477888 |  |
| 230465_at    | HS2ST1         | -1,240169874 | -1,862647763 | 0,622477888 |  |
| 232308_at    | TTC21A         | -1,240169874 | -1,862647763 | 0,622477888 |  |
| 235972_at    | TMEM131        | -1,240169874 | -1,862647763 | 0,622477888 |  |
| 236509_at    | -              | -1,240169874 | -1,862647763 | 0,622477888 |  |
| 237051_at    | -              | -1,240169874 | -1,862647763 | 0,622477888 |  |
| 237291_at    | PRORS1P        | -1,240169874 | -1,862647763 | 0,622477888 |  |
| 241074_at    | -              | -1,240169874 | -1,862647763 | 0,622477888 |  |
| 212467_at    | DNAJC13        | 2,693452197  | 2,071071048  | 0,622381149 |  |
| 225134_at    | SPRYD3         | 0,779676066  | 0,157549243  | 0,622126823 |  |
| 212920_at    | REST           | 3,674351634  | 3,052311115  | 0,622040519 |  |
| 205577_at    | PYGM           | -0,234278768 | -0,855751026 | 0,621472259 |  |
| 208041_at    | GRK1           | -0,234278768 | -0,855751026 | 0,621472259 |  |
| 236145_at    | -              | -0,234278768 | -0,855751026 | 0,621472259 |  |
| 230759_at    | SNX14          | 1,210676994  | 0,589657387  | 0,621019607 |  |
| 216582_at    | POM121L2       | 0,518867317  | -0,102100538 | 0,620967855 |  |
| 1563362_at   | D21S2090E      | -1,71423189  | -2,335104118 | 0,620872228 |  |
| 219985_at    | HS3ST3A1       | -1,71423189  | -2,335104118 | 0,620872228 |  |
| 222834_s_at  | GNG12          | -1,71423189  | -2,335104118 | 0,620872228 |  |

|              |                  |              |              |             |  |
|--------------|------------------|--------------|--------------|-------------|--|
| 223973_at    | MIR7-3HG         | -1,71423189  | -2,335104118 | 0,620872228 |  |
| 238195_at    | -                | -1,71423189  | -2,335104118 | 0,620872228 |  |
| 211382_s_at  | TACC2            | 0,541261317  | -0,079522948 | 0,620784265 |  |
| 207781_s_at  | ZNF711           | 1,496984567  | 0,876248481  | 0,620736086 |  |
| 204037_at    | LPAR1            | -1,591296941 | -2,211750327 | 0,620453386 |  |
| 208026_at    | HIST1H4A /// HIS | -1,591296941 | -2,211750327 | 0,620453386 |  |
| 217323_at    | HLA-DRB6         | -1,591296941 | -2,211750327 | 0,620453386 |  |
| 233866_at    | KLHL5            | -1,591296941 | -2,211750327 | 0,620453386 |  |
| 234387_at    | COL4A5           | -1,591296941 | -2,211750327 | 0,620453386 |  |
| 235851_s_at  | GNAS             | -1,591296941 | -2,211750327 | 0,620453386 |  |
| 236741_at    | WDR72            | -1,591296941 | -2,211750327 | 0,620453386 |  |
| 237983_at    | -                | -1,591296941 | -2,211750327 | 0,620453386 |  |
| 239057_at    | LMOD2            | -1,591296941 | -2,211750327 | 0,620453386 |  |
| 244679_at    | -                | -1,591296941 | -2,211750327 | 0,620453386 |  |
| 215919_s_at  | MRPS11           | 0,627515113  | 0,007421914  | 0,620093199 |  |
| 205479_s_at  | PLAU             | 3,205636958  | 2,585563171  | 0,620073787 |  |
| 228744_at    | HAUS2            | 2,038300149  | 1,418668082  | 0,619632067 |  |
| 206811_at    | ADCY8            | -1,543331864 | -2,162639771 | 0,619307907 |  |
| 208356_x_at  | CSH1             | -1,543331864 | -2,162639771 | 0,619307907 |  |
| 216864_at    | -                | -1,543331864 | -2,162639771 | 0,619307907 |  |
| 222953_at    | GPR83            | -1,543331864 | -2,162639771 | 0,619307907 |  |
| 233074_at    | -                | -1,543331864 | -2,162639771 | 0,619307907 |  |
| 240557_at    | -                | -1,543331864 | -2,162639771 | 0,619307907 |  |
| 243117_at    | -                | -1,543331864 | -2,162639771 | 0,619307907 |  |
| 1553698_a_at | CCSAP            | 0,083054335  | -0,536087151 | 0,619141486 |  |
| 1565903_at   | -                | 0,083054335  | -0,536087151 | 0,619141486 |  |
| 230852_at    | STAC3            | 0,083054335  | -0,536087151 | 0,619141486 |  |
| 237754_at    | LOC100506559     | 0,052199481  | -0,566887459 | 0,61908694  |  |
| 215133_s_at  | FAM153A /// FAM  | -2,479842156 | -3,098858316 | 0,61901616  |  |
| 211660_at    | POU2F2           | 0,20027154   | -0,41858459  | 0,618856129 |  |
| 232751_at    | RBBP9            | 0,20027154   | -0,41858459  | 0,618856129 |  |
| 202066_at    | PPFIA1           | 3,308224834  | 2,689475799  | 0,618749035 |  |
| 36499_at     | CELSR2           | 0,228150971  | -0,390416179 | 0,61856715  |  |
| 218043_s_at  | AZI2             | 0,841135803  | 0,222599095  | 0,618536708 |  |
| 224204_x_at  | ARNTL2           | 0,334552598  | -0,283667828 | 0,618220426 |  |
| 228161_at    | RAB32            | 0,334552598  | -0,283667828 | 0,618220426 |  |
| 221215_s_at  | RIPK4            | 0,359971644  | -0,258114234 | 0,618085878 |  |
| 227351_at    | C16orf52         | 0,359971644  | -0,258114234 | 0,618085878 |  |
| 235027_at    | FLJ43489         | 2,589836943  | 1,971855016  | 0,617981927 |  |
| 204778_x_at  | HOXB7            | -0,112808516 | -0,730778808 | 0,617970292 |  |
| 207280_at    | RNF185-AS1       | -0,112808516 | -0,730778808 | 0,617970292 |  |
| 216391_s_at  | KLHL1            | -0,112808516 | -0,730778808 | 0,617970292 |  |
| 231189_at    | -                | -0,112808516 | -0,730778808 | 0,617970292 |  |
| 1559565_x_at | -                | -0,759588698 | -1,377419394 | 0,617830696 |  |
| 211798_x_at  | IGLJ3            | -0,759588698 | -1,377419394 | 0,617830696 |  |
| 243881_at    | SHC3             | -0,759588698 | -1,377419394 | 0,617830696 |  |
| 1552752_a_at | CADM2            | -1,838812296 | -2,456406426 | 0,61759413  |  |
| 1552940_at   | TEDDM1           | -1,838812296 | -2,456406426 | 0,61759413  |  |
| 1556369_a_at | PHKG2            | -1,838812296 | -2,456406426 | 0,61759413  |  |
| 1557166_at   | PDCD4            | -1,838812296 | -2,456406426 | 0,61759413  |  |
| 1558748_at   | -                | -1,838812296 | -2,456406426 | 0,61759413  |  |
| 1560788_at   | MYO3B            | -1,838812296 | -2,456406426 | 0,61759413  |  |
| 1568795_at   | -                | -1,838812296 | -2,456406426 | 0,61759413  |  |
| 207790_at    | LRRC1            | -1,838812296 | -2,456406426 | 0,61759413  |  |
| 215391_at    | MAP1A            | -1,838812296 | -2,456406426 | 0,61759413  |  |
| 215998_at    | -                | -1,838812296 | -2,456406426 | 0,61759413  |  |

|              |              |              |              |             |  |
|--------------|--------------|--------------|--------------|-------------|--|
| 230752_at    | -            | -1,838812296 | -2,456406426 | 0,61759413  |  |
| 233514_x_at  | TEX11        | -1,838812296 | -2,456406426 | 0,61759413  |  |
| 239585_at    | -            | -1,838812296 | -2,456406426 | 0,61759413  |  |
| 241372_at    | ZC3H6        | -1,838812296 | -2,456406426 | 0,61759413  |  |
| 242894_at    | -            | -1,838812296 | -2,456406426 | 0,61759413  |  |
| 243293_at    | -            | -1,838812296 | -2,456406426 | 0,61759413  |  |
| 243826_at    | -            | -1,838812296 | -2,456406426 | 0,61759413  |  |
| 210050_at    | TPI1         | 0,457392764  | -0,160136748 | 0,617529513 |  |
| 218712_at    | C1orf109     | 2,688444421  | 2,071071048  | 0,617373373 |  |
| 210804_x_at  | SLC8A1       | -0,148196756 | -0,765504029 | 0,617307273 |  |
| 227719_at    | SMAD9        | -0,148196756 | -0,765504029 | 0,617307273 |  |
| 239577_at    | -            | -0,148196756 | -0,765504029 | 0,617307273 |  |
| 241556_at    | -            | -0,148196756 | -0,765504029 | 0,617307273 |  |
| 223651_x_at  | CDC23        | 1,481627361  | 0,864649967  | 0,616977394 |  |
| 237002_at    | NCDN         | 0,592200562  | -0,024572586 | 0,616773148 |  |
| 231252_at    | KANSL1L      | 0,695652136  | 0,079428135  | 0,616224001 |  |
| 1555988_a_at | LOC126536    | -1,470833215 | -2,086984744 | 0,616151528 |  |
| 1563805_a_at | FAM83C       | -1,470833215 | -2,086984744 | 0,616151528 |  |
| 1569743_at   | -            | -1,470833215 | -2,086984744 | 0,616151528 |  |
| 204722_at    | SCN3B        | -1,470833215 | -2,086984744 | 0,616151528 |  |
| 209763_at    | CHRD1        | -1,470833215 | -2,086984744 | 0,616151528 |  |
| 227742_at    | CLIC6        | -1,470833215 | -2,086984744 | 0,616151528 |  |
| 231244_at    | CASD1        | -1,470833215 | -2,086984744 | 0,616151528 |  |
| 231482_at    | -            | -1,470833215 | -2,086984744 | 0,616151528 |  |
| 232687_at    | -            | -1,470833215 | -2,086984744 | 0,616151528 |  |
| 233925_at    | -            | -1,470833215 | -2,086984744 | 0,616151528 |  |
| 242491_at    | -            | -1,470833215 | -2,086984744 | 0,616151528 |  |
| 243336_at    | LOC100132292 | -1,470833215 | -2,086984744 | 0,616151528 |  |
| 201300_s_at  | PRNP         | 5,026966555  | 4,411005377  | 0,615961178 |  |
| 207370_at    | IBSP         | -0,496991414 | -1,112851844 | 0,61586043  |  |
| 218218_at    | APPL2        | -0,496991414 | -1,112851844 | 0,61586043  |  |
| 220289_s_at  | AIM1L        | -0,496991414 | -1,112851844 | 0,61586043  |  |
| 236994_at    | -            | -0,496991414 | -1,112851844 | 0,61586043  |  |
| 1556808_at   | -            | -1,047650486 | -1,663414495 | 0,615764009 |  |
| 1558722_at   | ZNF252P      | -1,047650486 | -1,663414495 | 0,615764009 |  |
| 1565818_s_at | IKZF1        | -1,047650486 | -1,663414495 | 0,615764009 |  |
| 213921_at    | SST          | -1,047650486 | -1,663414495 | 0,615764009 |  |
| 215876_at    | -            | -1,047650486 | -1,663414495 | 0,615764009 |  |
| 235994_s_at  | PLAC2        | -1,047650486 | -1,663414495 | 0,615764009 |  |
| 239536_at    | -            | -1,047650486 | -1,663414495 | 0,615764009 |  |
| 244771_at    | KBTBD12      | -1,047650486 | -1,663414495 | 0,615764009 |  |
| 209803_s_at  | PHLDA2       | 2,886560922  | 2,271023131  | 0,61553779  |  |
| 1557669_at   | LOC100132005 | -0,394749123 | -1,010192375 | 0,615443252 |  |
| 1559127_x_at | RRP12        | -0,394749123 | -1,010192375 | 0,615443252 |  |
| 206122_at    | SOX15        | -0,394749123 | -1,010192375 | 0,615443252 |  |
| 215712_s_at  | IGFALS       | -0,394749123 | -1,010192375 | 0,615443252 |  |
| 219776_s_at  | -            | -0,394749123 | -1,010192375 | 0,615443252 |  |
| 236087_at    | ABLM2        | -0,394749123 | -1,010192375 | 0,615443252 |  |
| 1555273_at   | GALNTL6      | -1,888254346 | -2,503677622 | 0,615423277 |  |
| 1558076_at   | ANKRD32      | -1,888254346 | -2,503677622 | 0,615423277 |  |
| 1561342_at   | LOC150005    | -1,888254346 | -2,503677622 | 0,615423277 |  |
| 207514_s_at  | GNAT1        | -1,888254346 | -2,503677622 | 0,615423277 |  |
| 231555_at    | -            | -1,888254346 | -2,503677622 | 0,615423277 |  |
| 236774_at    | -            | -1,888254346 | -2,503677622 | 0,615423277 |  |
| 236868_at    | -            | -1,888254346 | -2,503677622 | 0,615423277 |  |
| 237932_at    | -            | -1,888254346 | -2,503677622 | 0,615423277 |  |

|              |              |              |              |             |  |
|--------------|--------------|--------------|--------------|-------------|--|
| 216186_at    | -            | 1,462198073  | 0,847075464  | 0,61512261  |  |
| 217554_at    | -            | -0,926850548 | -1,541908042 | 0,615057494 |  |
| 236559_at    | YWHAH        | -0,926850548 | -1,541908042 | 0,615057494 |  |
| 237833_s_at  | SNCAIP       | -0,926850548 | -1,541908042 | 0,615057494 |  |
| 238248_at    | -            | -0,926850548 | -1,541908042 | 0,615057494 |  |
| 243323_s_at  | ZFH3         | -0,926850548 | -1,541908042 | 0,615057494 |  |
| 218224_at    | PNMA1        | 4,893714114  | 4,279061697  | 0,614652417 |  |
| 204635_at    | RPS6KA5      | 1,094335495  | 0,479907041  | 0,614428454 |  |
| 231975_s_at  | MIER3        | 2,064305961  | 1,450051551  | 0,61425441  |  |
| 211839_s_at  | CSF1         | 0,291166226  | -0,322870281 | 0,614036507 |  |
| 221707_s_at  | VPS53        | -0,00073712  | -0,614371577 | 0,613634456 |  |
| 225768_at    | NR1D2        | -0,00073712  | -0,614371577 | 0,613634456 |  |
| 240365_at    | LOC647946    | -0,00073712  | -0,614371577 | 0,613634456 |  |
| 224320_s_at  | MCM8         | 1,859746653  | 1,246149888  | 0,613596765 |  |
| 1557657_a_at | LOC400238    | -1,424023738 | -2,037551727 | 0,613527988 |  |
| 1559656_a_at | LOC100507244 | -1,424023738 | -2,037551727 | 0,613527988 |  |
| 1561257_at   | LOC286083    | -1,424023738 | -2,037551727 | 0,613527988 |  |
| 210195_s_at  | PSG1         | -1,424023738 | -2,037551727 | 0,613527988 |  |
| 216487_at    | -            | -1,424023738 | -2,037551727 | 0,613527988 |  |
| 217222_at    | IGHG1        | -1,424023738 | -2,037551727 | 0,613527988 |  |
| 217539_at    | C1orf25      | -1,424023738 | -2,037551727 | 0,613527988 |  |
| 224385_s_at  | MOV10L1      | -1,424023738 | -2,037551727 | 0,613527988 |  |
| 229152_at    | FDCSP        | -1,424023738 | -2,037551727 | 0,613527988 |  |
| 231077_at    | C1orf192     | -1,424023738 | -2,037551727 | 0,613527988 |  |
| 234324_at    | NHSL1        | -1,424023738 | -2,037551727 | 0,613527988 |  |
| 238889_at    | AGBL5        | -1,424023738 | -2,037551727 | 0,613527988 |  |
| 240389_at    | TRPM6        | -1,424023738 | -2,037551727 | 0,613527988 |  |
| 240823_at    | -            | -1,424023738 | -2,037551727 | 0,613527988 |  |
| 241442_at    | -            | -1,424023738 | -2,037551727 | 0,613527988 |  |
| 243334_at    | CACNA1D      | -1,424023738 | -2,037551727 | 0,613527988 |  |
| 237792_at    | -            | 0,533835206  | -0,079522948 | 0,613358154 |  |
| 1552969_a_at | ZMYM6        | -1,173767127 | -1,787089803 | 0,613322676 |  |
| 206024_at    | HPD          | -1,173767127 | -1,787089803 | 0,613322676 |  |
| 226989_at    | RGMB         | -1,173767127 | -1,787089803 | 0,613322676 |  |
| 234592_at    | -            | -1,173767127 | -1,787089803 | 0,613322676 |  |
| 242627_at    | -            | -1,173767127 | -1,787089803 | 0,613322676 |  |
| 1569380_a_at | HERPUD1      | -0,299034815 | -0,912331589 | 0,613296774 |  |
| 211634_x_at  | IGHM         | -0,299034815 | -0,912331589 | 0,613296774 |  |
| 218207_s_at  | STMN3        | -0,299034815 | -0,912331589 | 0,613296774 |  |
| 221508_at    | TAOK3        | -0,299034815 | -0,912331589 | 0,613296774 |  |
| 229003_x_at  | FAM69B       | -0,299034815 | -0,912331589 | 0,613296774 |  |
| 214488_at    | RAP2B        | -0,033456564 | -0,646746079 | 0,613289514 |  |
| 232097_at    | TOX4         | -0,033456564 | -0,646746079 | 0,613289514 |  |
| 201755_at    | MCM5         | 2,671625168  | 2,058399602  | 0,613225566 |  |
| 227786_at    | MED30        | 2,959046717  | 2,345926937  | 0,613119781 |  |
| 225055_at    | LOC100499466 | 0,641402394  | 0,028364014  | 0,61303838  |  |
| 241904_at    | -            | 0,641402394  | 0,028364014  | 0,61303838  |  |
| 1553288_a_at | NYAP1        | -0,43775896  | -1,050406615 | 0,612647655 |  |
| 208252_s_at  | CHST3        | -0,43775896  | -1,050406615 | 0,612647655 |  |
| 217053_x_at  | ETV1         | -0,43775896  | -1,050406615 | 0,612647655 |  |
| 229904_at    | -            | -0,43775896  | -1,050406615 | 0,612647655 |  |
| 231534_at    | CDK1         | -0,43775896  | -1,050406615 | 0,612647655 |  |
| 237585_at    | C4orf47      | -0,43775896  | -1,050406615 | 0,612647655 |  |
| 229501_s_at  | USP8         | 1,64218396   | 1,029536893  | 0,612647067 |  |
| 215783_s_at  | ALPL         | -0,543051993 | -1,154897679 | 0,611845686 |  |
| 220988_s_at  | C1QTNF3      | -0,543051993 | -1,154897679 | 0,611845686 |  |



|              |                 |              |              |             |  |
|--------------|-----------------|--------------|--------------|-------------|--|
| 233298_at    | CCDC169         | -0,543051993 | -1,154897679 | 0,611845686 |  |
| 226090_x_at  | RABL3           | 2,166283906  | 1,55481039   | 0,611473515 |  |
| 1566832_at   | TOP1P2          | -2,384869671 | -2,996335703 | 0,611466032 |  |
| 208498_s_at  | ACTG1P4 /// AM  | -2,384869671 | -2,996335703 | 0,611466032 |  |
| 1563495_at   | SLC9C2          | -1,964176657 | -2,575129729 | 0,610953072 |  |
| 1564561_at   | -               | -1,964176657 | -2,575129729 | 0,610953072 |  |
| 1566215_at   | -               | -1,964176657 | -2,575129729 | 0,610953072 |  |
| 1566924_at   | -               | -1,964176657 | -2,575129729 | 0,610953072 |  |
| 1570629_at   | -               | -1,964176657 | -2,575129729 | 0,610953072 |  |
| 205959_at    | MMP13           | -1,964176657 | -2,575129729 | 0,610953072 |  |
| 207450_s_at  | POU6F2          | -1,964176657 | -2,575129729 | 0,610953072 |  |
| 215585_at    | -               | -1,964176657 | -2,575129729 | 0,610953072 |  |
| 216628_at    | -               | -1,964176657 | -2,575129729 | 0,610953072 |  |
| 1552933_at   | AKNAD1          | -2,236765673 | -2,847001814 | 0,610236141 |  |
| 1561339_at   | -               | -2,236765673 | -2,847001814 | 0,610236141 |  |
| 226612_at    | UBE2QL1         | -2,236765673 | -2,847001814 | 0,610236141 |  |
| 240120_at    | -               | -2,236765673 | -2,847001814 | 0,610236141 |  |
| 210733_at    | -               | 2,799441827  | 2,189694216  | 0,609747611 |  |
| 1553668_at   | LRCH3           | 0,351548291  | -0,258114234 | 0,609662525 |  |
| 1556747_a_at | -               | 1,027166904  | 0,417770464  | 0,609396441 |  |
| 215256_x_at  | ARHGAP33        | 0,072842263  | -0,536087151 | 0,608929413 |  |
| 1556279_at   | -               | -0,655928373 | -1,264005341 | 0,608076968 |  |
| 216269_s_at  | ELN             | -0,655928373 | -1,264005341 | 0,608076968 |  |
| 229162_s_at  | ABTB1           | -0,655928373 | -1,264005341 | 0,608076968 |  |
| 229495_at    | PM20D2          | -0,655928373 | -1,264005341 | 0,608076968 |  |
| 229953_x_at  | LCA5            | -0,655928373 | -1,264005341 | 0,608076968 |  |
| 240172_at    | ERGIC2          | -0,655928373 | -1,264005341 | 0,608076968 |  |
| 1553392_at   | EFCAB3          | -1,353583928 | -1,961547147 | 0,607963219 |  |
| 1558401_at   | -               | -1,353583928 | -1,961547147 | 0,607963219 |  |
| 1562507_at   | -               | -1,353583928 | -1,961547147 | 0,607963219 |  |
| 1564257_at   | LOC100132116    | -1,353583928 | -1,961547147 | 0,607963219 |  |
| 205531_s_at  | GLS2            | -1,353583928 | -1,961547147 | 0,607963219 |  |
| 215477_at    | -               | -1,353583928 | -1,961547147 | 0,607963219 |  |
| 215872_at    | -               | -1,353583928 | -1,961547147 | 0,607963219 |  |
| 216926_s_at  | MAU2            | -1,353583928 | -1,961547147 | 0,607963219 |  |
| 217688_at    | -               | -1,353583928 | -1,961547147 | 0,607963219 |  |
| 227747_at    | MPZL3           | -1,353583928 | -1,961547147 | 0,607963219 |  |
| 228892_at    | SH3RF2          | -1,353583928 | -1,961547147 | 0,607963219 |  |
| 234918_at    | GLTSCR2         | -1,353583928 | -1,961547147 | 0,607963219 |  |
| 239194_at    | DNAJC30         | -1,353583928 | -1,961547147 | 0,607963219 |  |
| 241755_at    | UQCRC2          | -1,353583928 | -1,961547147 | 0,607963219 |  |
| 1560028_at   | C11orf57        | -2,01371626  | -2,621331989 | 0,607615729 |  |
| 1561895_at   | -               | -2,01371626  | -2,621331989 | 0,607615729 |  |
| 1569183_a_at | CHM             | -2,01371626  | -2,621331989 | 0,607615729 |  |
| 213591_at    | ALDH7A1         | -2,01371626  | -2,621331989 | 0,607615729 |  |
| 215149_at    | -               | -2,01371626  | -2,621331989 | 0,607615729 |  |
| 236582_at    | -               | -2,01371626  | -2,621331989 | 0,607615729 |  |
| 240941_at    | -               | -2,01371626  | -2,621331989 | 0,607615729 |  |
| 243811_at    | HOXB1           | -2,01371626  | -2,621331989 | 0,607615729 |  |
| 218487_at    | ALAD            | 1,567778694  | 0,960386719  | 0,607391974 |  |
| 1553286_at   | ZNF555          | 1,556829052  | 0,949447784  | 0,607381268 |  |
| 203757_s_at  | CEACAM6         | -1,131062212 | -1,738067356 | 0,607005143 |  |
| 209505_at    | NR2F1           | -1,131062212 | -1,738067356 | 0,607005143 |  |
| 217248_s_at  | SLC7A8          | -1,131062212 | -1,738067356 | 0,607005143 |  |
| 217350_at    | KRT19P2 /// MIR | -1,131062212 | -1,738067356 | 0,607005143 |  |
| 219514_at    | ANGPTL2         | -1,131062212 | -1,738067356 | 0,607005143 |  |

|              |              |              |              |             |  |
|--------------|--------------|--------------|--------------|-------------|--|
| 221340_at    | CDX4         | -1,131062212 | -1,738067356 | 0,607005143 |  |
| 221360_s_at  | GHSR         | -1,131062212 | -1,738067356 | 0,607005143 |  |
| 225631_at    | EEPD1        | -1,131062212 | -1,738067356 | 0,607005143 |  |
| 231903_x_at  | ARHGAP23     | -1,131062212 | -1,738067356 | 0,607005143 |  |
| 235101_at    | FNBP4        | -1,131062212 | -1,738067356 | 0,607005143 |  |
| 235910_x_at  | ZNF316       | -1,131062212 | -1,738067356 | 0,607005143 |  |
| 238916_at    | LOC400027    | -1,131062212 | -1,738067356 | 0,607005143 |  |
| 243332_at    | -            | -1,131062212 | -1,738067356 | 0,607005143 |  |
| 234650_at    | -            | -2,667025278 | -3,273861381 | 0,606836104 |  |
| 218629_at    | SMO          | 0,917308734  | 0,310717132  | 0,606591602 |  |
| 238662_at    | ATPBD4       | 0,82905153   | 0,222599095  | 0,606452436 |  |
| 1552470_a_at | ABHD11       | -0,888496123 | -1,494668682 | 0,606172559 |  |
| 1553044_at   | GJA10        | -0,888496123 | -1,494668682 | 0,606172559 |  |
| 1559425_at   | -            | -0,888496123 | -1,494668682 | 0,606172559 |  |
| 214637_at    | OSM          | -0,888496123 | -1,494668682 | 0,606172559 |  |
| 231126_at    | C2orf70      | -0,888496123 | -1,494668682 | 0,606172559 |  |
| 238752_at    | GPLD1        | -0,888496123 | -1,494668682 | 0,606172559 |  |
| 243999_at    | SLFN5        | -0,888496123 | -1,494668682 | 0,606172559 |  |
| 201822_at    | TIMM17A      | 0,384950573  | -0,220592223 | 0,605542797 |  |
| 204024_at    | OSGIN2       | 0,384950573  | -0,220592223 | 0,605542797 |  |
| 224519_at    | LOC100132167 | 0,384950573  | -0,220592223 | 0,605542797 |  |
| 240181_at    | ZSCAN12      | 0,255492549  | -0,34958478  | 0,60507733  |  |
| 1569790_at   | -            | -2,43257096  | -3,037500868 | 0,604929908 |  |
| 207523_at    | C6orf10      | -2,43257096  | -3,037500868 | 0,604929908 |  |
| 1553456_at   | -            | -1,308181863 | -1,912089812 | 0,603907949 |  |
| 1558444_at   | -            | -1,308181863 | -1,912089812 | 0,603907949 |  |
| 1563079_at   | LOC100289090 | -1,308181863 | -1,912089812 | 0,603907949 |  |
| 1563296_at   | LINC00572    | -1,308181863 | -1,912089812 | 0,603907949 |  |
| 1568768_s_at | BRE-AS1      | -1,308181863 | -1,912089812 | 0,603907949 |  |
| 205297_s_at  | CD79B        | -1,308181863 | -1,912089812 | 0,603907949 |  |
| 213525_at    | -            | -1,308181863 | -1,912089812 | 0,603907949 |  |
| 214641_at    | COL4A3       | -1,308181863 | -1,912089812 | 0,603907949 |  |
| 217471_at    | -            | -1,308181863 | -1,912089812 | 0,603907949 |  |
| 219845_at    | BARX1        | -1,308181863 | -1,912089812 | 0,603907949 |  |
| 244668_at    | -            | -1,308181863 | -1,912089812 | 0,603907949 |  |
| 222360_at    | DPH5         | 0,95671774   | 0,352836757  | 0,603880983 |  |
| 204211_x_at  | EIF2AK2      | 3,237986416  | 2,634191677  | 0,603794739 |  |
| 240166_x_at  | TRMT10B      | 0,87091093   | 0,26733076   | 0,60358017  |  |
| 235156_at    | BRWD3        | 0,760715727  | 0,157549243  | 0,603166484 |  |
| 201598_s_at  | INPPL1       | 2,352981171  | 1,750261389  | 0,602719782 |  |
| 230116_at    | KRT8P12      | 0,57782909   | -0,024572586 | 0,602401677 |  |
| 221550_at    | COX15        | 2,001086023  | 1,398700978  | 0,602385045 |  |
| 204465_s_at  | INA          | 0,46522187   | -0,136643983 | 0,601865853 |  |
| 239252_at    | COX7B        | 0,44160593   | -0,160136748 | 0,601742678 |  |
| 214450_at    | CTSW         | -0,078265071 | -0,679763839 | 0,601498768 |  |
| 1553079_at   | TRIM40       | -2,089474779 | -2,690860744 | 0,601385965 |  |
| 1562742_at   | -            | -2,089474779 | -2,690860744 | 0,601385965 |  |
| 1569864_at   | SERAC1       | -2,089474779 | -2,690860744 | 0,601385965 |  |
| 1570357_at   | STX8         | -2,089474779 | -2,690860744 | 0,601385965 |  |
| 221438_s_at  | TEX12        | -2,089474779 | -2,690860744 | 0,601385965 |  |
| 229662_at    | -            | -2,089474779 | -2,690860744 | 0,601385965 |  |
| 237684_at    | LOC100507461 | -2,089474779 | -2,690860744 | 0,601385965 |  |
| 204025_s_at  | PDCD2        | 3,873548912  | 3,272369332  | 0,601179579 |  |
| 213481_at    | S100A13      | 0,317354302  | -0,283667828 | 0,601022129 |  |
| 227575_s_at  | C14orf102    | 1,655931423  | 1,055274826  | 0,600656597 |  |
| 204231_s_at  | FAAH         | -0,512251684 | -1,112851844 | 0,600600159 |  |

|              |                 |              |              |             |  |
|--------------|-----------------|--------------|--------------|-------------|--|
| 204945_at    | PTPRN           | -0,512251684 | -1,112851844 | 0,600600159 |  |
| 219726_at    | NLGN3           | -0,512251684 | -1,112851844 | 0,600600159 |  |
| 235970_at    | LCORL           | -0,512251684 | -1,112851844 | 0,600600159 |  |
| 238100_at    | AAK1            | -0,512251684 | -1,112851844 | 0,600600159 |  |
| 239154_at    | -               | -0,512251684 | -1,112851844 | 0,600600159 |  |
| 1552882_a_at | FAM123B         | 0,209623097  | -0,39061235  | 0,600235447 |  |
| 1564229_at   | LOC729173       | 0,209623097  | -0,39061235  | 0,600235447 |  |
| 208395_s_at  | URB1            | 0,209623097  | -0,39061235  | 0,600235447 |  |
| 237013_at    | -               | 0,209623097  | -0,39061235  | 0,600235447 |  |
| 230696_at    | LOC100289092    | 1,560488174  | 0,960386719  | 0,600101455 |  |
| 209028_s_at  | ABI1            | 2,427005622  | 1,826973888  | 0,600031734 |  |
| 221334_s_at  | FOXP3           | 0,181384709  | -0,41858459  | 0,599969299 |  |
| 215532_x_at  | ZNF492          | 1,504602299  | 0,904843258  | 0,59975904  |  |
| 217744_s_at  | PERP            | 0,627515113  | 0,028364014  | 0,599151099 |  |
| 47571_at     | ZNF236          | 1,764611101  | 1,16573017   | 0,59888093  |  |
| 1553084_at   | STARD6          | -1,688127507 | -2,286583451 | 0,598455944 |  |
| 1558001_s_at | ARID5B          | -1,688127507 | -2,286583451 | 0,598455944 |  |
| 1558414_at   | FRRS1L          | -1,688127507 | -2,286583451 | 0,598455944 |  |
| 1561589_a_at | NBEAL1          | -1,688127507 | -2,286583451 | 0,598455944 |  |
| 207234_at    | RFX3            | -1,688127507 | -2,286583451 | 0,598455944 |  |
| 215571_at    | -               | -1,688127507 | -2,286583451 | 0,598455944 |  |
| 231916_at    | NOS1            | -1,688127507 | -2,286583451 | 0,598455944 |  |
| 232498_at    | HEATR7A /// LOC | -1,688127507 | -2,286583451 | 0,598455944 |  |
| 234850_at    | MOGAT3          | -1,688127507 | -2,286583451 | 0,598455944 |  |
| 237322_at    | MIAT            | -1,688127507 | -2,286583451 | 0,598455944 |  |
| 242830_at    | -               | -1,688127507 | -2,286583451 | 0,598455944 |  |
| 1562098_at   | -               | 0,03125738   | -0,566887459 | 0,598144839 |  |
| 210051_at    | RAPGEF3         | 0,03125738   | -0,566887459 | 0,598144839 |  |
| 235088_at    | C4orf46         | 3,142344098  | 2,544354523  | 0,597989575 |  |
| 203583_at    | UNC50           | 3,785615967  | 3,187631636  | 0,597984331 |  |
| 214297_at    | CSPG4           | -0,352951799 | -0,950686014 | 0,597734216 |  |
| 243895_x_at  | -               | -0,352951799 | -0,950686014 | 0,597734216 |  |
| 229217_at    | SP3             | -0,221656139 | -0,819238336 | 0,597582198 |  |
| 1553051_s_at | ODF3            | -0,622910612 | -1,220210588 | 0,597299975 |  |
| 1555468_at   | NRP2            | -0,622910612 | -1,220210588 | 0,597299975 |  |
| 1558569_at   | LOC100131541    | -0,622910612 | -1,220210588 | 0,597299975 |  |
| 200724_at    | RPL10           | -0,622910612 | -1,220210588 | 0,597299975 |  |
| 206541_at    | KLKB1           | -0,622910612 | -1,220210588 | 0,597299975 |  |
| 209312_x_at  | HLA-DRB1 /// HL | -0,622910612 | -1,220210588 | 0,597299975 |  |
| 212874_at    | APOE            | -0,622910612 | -1,220210588 | 0,597299975 |  |
| 215500_at    | SNX29           | -0,622910612 | -1,220210588 | 0,597299975 |  |
| 215921_at    | NPIPL3          | -0,622910612 | -1,220210588 | 0,597299975 |  |
| 236606_at    | -               | -0,622910612 | -1,220210588 | 0,597299975 |  |
| 238925_at    | SNTB2           | -0,622910612 | -1,220210588 | 0,597299975 |  |
| 229488_at    | OTUD7B          | 0,376672223  | -0,220592223 | 0,597264447 |  |
| 209649_at    | STAM2           | 2,305800198  | 1,708698295  | 0,597101903 |  |
| 1556903_at   | -               | -2,138804305 | -2,735862426 | 0,59705812  |  |
| 1562424_at   | LOC285889       | -2,138804305 | -2,735862426 | 0,59705812  |  |
| 1566461_at   | -               | -2,138804305 | -2,735862426 | 0,59705812  |  |
| 213267_at    | DOPEY1          | -2,138804305 | -2,735862426 | 0,59705812  |  |
| 216424_at    | CD4             | -2,138804305 | -2,735862426 | 0,59705812  |  |
| 227210_at    | SFMBT2          | -2,138804305 | -2,735862426 | 0,59705812  |  |
| 240531_at    | -               | -2,138804305 | -2,735862426 | 0,59705812  |  |
| 242334_at    | NLRP4           | -2,138804305 | -2,735862426 | 0,59705812  |  |
| 244446_at    | LOC100505525    | -2,138804305 | -2,735862426 | 0,59705812  |  |
| 203543_s_at  | KLF9            | 1,114389003  | 0,51742585   | 0,596963153 |  |

|              |                  |              |              |             |  |
|--------------|------------------|--------------|--------------|-------------|--|
| 209206_at    | SEC22B           | 3,21379258   | 2,617011906  | 0,596780674 |  |
| 236281_x_at  | HTR7             | 0,273439642  | -0,322870281 | 0,596309923 |  |
| 228468_at    | MASTL            | 1,912238072  | 1,315948728  | 0,596289344 |  |
| 1561516_at   | -                | -1,812418401 | -2,408705138 | 0,596286737 |  |
| 1563059_at   | LOC340581        | -1,812418401 | -2,408705138 | 0,596286737 |  |
| 1569102_at   | ABCA4            | -1,812418401 | -2,408705138 | 0,596286737 |  |
| 205112_at    | PLCE1            | -1,812418401 | -2,408705138 | 0,596286737 |  |
| 216907_x_at  | KIR3DL1 /// KIR3 | -1,812418401 | -2,408705138 | 0,596286737 |  |
| 220877_at    | -                | -1,812418401 | -2,408705138 | 0,596286737 |  |
| 228113_at    | RAB37            | -1,812418401 | -2,408705138 | 0,596286737 |  |
| 231051_at    | M1               | -1,812418401 | -2,408705138 | 0,596286737 |  |
| 232753_at    | ZNF346           | -1,812418401 | -2,408705138 | 0,596286737 |  |
| 236987_at    | -                | -1,812418401 | -2,408705138 | 0,596286737 |  |
| 1557154_at   | -                | 0,246434561  | -0,34958478  | 0,596019341 |  |
| 1569001_at   | BMP1             | 0,246434561  | -0,34958478  | 0,596019341 |  |
| 229289_at    | FAM71E1          | -0,259832361 | -0,855751026 | 0,595918665 |  |
| 239682_at    | -                | -0,259832361 | -0,855751026 | 0,595918665 |  |
| 215207_x_at  | NUS1 /// NUS1P3  | 1,973904239  | 1,378453643  | 0,595450595 |  |
| 1561448_at   | -                | -2,359436556 | -2,954576755 | 0,595140199 |  |
| 1562847_at   | -                | -2,359436556 | -2,954576755 | 0,595140199 |  |
| 1569808_at   | -                | -2,359436556 | -2,954576755 | 0,595140199 |  |
| 221470_s_at  | IL37             | -2,359436556 | -2,954576755 | 0,595140199 |  |
| 234529_at    | PCGEM1           | -2,359436556 | -2,954576755 | 0,595140199 |  |
| 1562955_at   | -                | -0,946847173 | -1,541908042 | 0,595060869 |  |
| 1568951_at   | ZNF280D          | -0,946847173 | -1,541908042 | 0,595060869 |  |
| 214165_s_at  | HS6ST1           | -0,946847173 | -1,541908042 | 0,595060869 |  |
| 230050_at    | NACC2            | -0,946847173 | -1,541908042 | 0,595060869 |  |
| 243692_at    | GATA4            | -0,946847173 | -1,541908042 | 0,595060869 |  |
| 221561_at    | SOAT1            | 2,983784569  | 2,389070873  | 0,594713696 |  |
| 207565_s_at  | MR1              | -0,136301282 | -0,730778808 | 0,594477526 |  |
| 211320_s_at  | PTPRU            | -0,136301282 | -0,730778808 | 0,594477526 |  |
| 214074_s_at  | CTTN             | 1,85379461   | 1,259496994  | 0,594297615 |  |
| 209318_x_at  | PLAGL1           | 4,229522279  | 3,635238397  | 0,594283882 |  |
| 227826_s_at  | -                | -2,504600601 | -3,098858316 | 0,594257715 |  |
| 232722_at    | RNASET2          | -2,504600601 | -3,098858316 | 0,594257715 |  |
| 234739_at    | -                | -2,504600601 | -3,098858316 | 0,594257715 |  |
| 205530_at    | ETFDH            | 1,089278259  | 0,495031851  | 0,594246409 |  |
| 1569732_at   | -                | 0,103263601  | -0,490927335 | 0,594190937 |  |
| 201882_x_at  | B4GALT1          | 0,103263601  | -0,490927335 | 0,594190937 |  |
| 206064_s_at  | PPIL2            | 0,103263601  | -0,490927335 | 0,594190937 |  |
| 222302_at    | LOC100507009     | 0,457392764  | -0,136643983 | 0,594036747 |  |
| 201181_at    | GNAI3            | 2,493593689  | 1,899812471  | 0,593781218 |  |
| 202319_at    | SENP6            | 1,251994932  | 0,658444279  | 0,593550653 |  |
| 223898_at    | ZNF670           | 3,381421359  | 2,787940144  | 0,593481215 |  |
| 229704_at    | PDS5B            | 1,90937145   | 1,315948728  | 0,593422722 |  |
| 1553694_a_at | PIK3C2A          | -0,172274514 | -0,765504029 | 0,593229515 |  |
| 200951_s_at  | CCND2            | -0,172274514 | -0,765504029 | 0,593229515 |  |
| 220713_at    | FAM116B          | -0,172274514 | -0,765504029 | 0,593229515 |  |
| 238381_x_at  | -                | -2,64318869  | -3,236070201 | 0,592881511 |  |
| 214877_at    | CDKAL1           | 1,348276312  | 0,755840599  | 0,592435712 |  |
| 1552318_at   | GIMAP1           | -2,187914861 | -2,780313924 | 0,592399063 |  |
| 1553448_at   | FLJ34503         | -2,187914861 | -2,780313924 | 0,592399063 |  |
| 1562432_at   | -                | -2,187914861 | -2,780313924 | 0,592399063 |  |
| 1566033_at   | -                | -2,187914861 | -2,780313924 | 0,592399063 |  |
| 229147_at    | RASSF6           | -2,187914861 | -2,780313924 | 0,592399063 |  |
| 241942_at    | PXDNL            | -2,187914861 | -2,780313924 | 0,592399063 |  |

|              |                 |              |              |             |  |
|--------------|-----------------|--------------|--------------|-------------|--|
| 228316_at    | C2orf63         | 0,30867765   | -0,283667828 | 0,592345477 |  |
| 244367_at    | -               | 0,30867765   | -0,283667828 | 0,592345477 |  |
| 201689_s_at  | TPD52           | 1,783520648  | 1,191491281  | 0,592029367 |  |
| 224335_s_at  | BACE1           | -0,022466681 | -0,614371577 | 0,591904896 |  |
| 230346_x_at  | -               | -0,022466681 | -0,614371577 | 0,591904896 |  |
| 1554261_at   | KLHL29          | -0,83191556  | -1,423348341 | 0,591432781 |  |
| 155529_at    | RNH1            | -0,83191556  | -1,423348341 | 0,591432781 |  |
| 1569416_at   | -               | -0,83191556  | -1,423348341 | 0,591432781 |  |
| 221594_at    | RBM48           | -0,83191556  | -1,423348341 | 0,591432781 |  |
| 230105_at    | HOXB13          | -0,83191556  | -1,423348341 | 0,591432781 |  |
| 233215_s_at  | ZDHHC21         | -0,83191556  | -1,423348341 | 0,591432781 |  |
| 244054_at    | -               | -0,83191556  | -1,423348341 | 0,591432781 |  |
| 1554103_at   | -               | -0,67289328  | -1,264005341 | 0,591112061 |  |
| 211778_s_at  | OVOL2           | -0,67289328  | -1,264005341 | 0,591112061 |  |
| 213679_at    | TTC30A          | -0,67289328  | -1,264005341 | 0,591112061 |  |
| 223739_at    | PADI1           | -0,67289328  | -1,264005341 | 0,591112061 |  |
| 232622_at    | -               | -0,67289328  | -1,264005341 | 0,591112061 |  |
| 219916_s_at  | RNF39           | -0,055687482 | -0,646746079 | 0,591058597 |  |
| 229588_at    | DNAJC10         | -0,055687482 | -0,646746079 | 0,591058597 |  |
| 237151_s_at  | PCDP1           | -0,055687482 | -0,646746079 | 0,591058597 |  |
| 202738_s_at  | PHKB            | 1,940595304  | 1,349621332  | 0,590973972 |  |
| 226681_at    | UBE2H           | -1,196375121 | -1,787089803 | 0,590714682 |  |
| 228985_at    | -               | -1,196375121 | -1,787089803 | 0,590714682 |  |
| 240343_at    | -               | -1,196375121 | -1,787089803 | 0,590714682 |  |
| 243246_at    | -               | -1,196375121 | -1,787089803 | 0,590714682 |  |
| 217606_at    | -               | 0,171847695  | -0,41858459  | 0,590432285 |  |
| 1562295_at   | ADAMTS9-AS2     | -0,741668563 | -1,332017329 | 0,590348766 |  |
| 1563715_at   | -               | -0,741668563 | -1,332017329 | 0,590348766 |  |
| 1569481_s_at | SNX22           | -0,741668563 | -1,332017329 | 0,590348766 |  |
| 203424_s_at  | IGFBP5          | -0,741668563 | -1,332017329 | 0,590348766 |  |
| 208067_x_at  | UTY             | -0,741668563 | -1,332017329 | 0,590348766 |  |
| 222461_s_at  | HERC2 /// LOC10 | -0,741668563 | -1,332017329 | 0,590348766 |  |
| 227513_s_at  | LRRFIP1         | -0,741668563 | -1,332017329 | 0,590348766 |  |
| 229493_at    | HOXD-AS2        | -0,741668563 | -1,332017329 | 0,590348766 |  |
| 233206_at    | SLC22A23        | -0,741668563 | -1,332017329 | 0,590348766 |  |
| 233693_at    | C1orf201        | -0,741668563 | -1,332017329 | 0,590348766 |  |
| 236553_at    | LOC100507520    | -0,741668563 | -1,332017329 | 0,590348766 |  |
| 239362_at    | NAPA-AS1        | -0,741668563 | -1,332017329 | 0,590348766 |  |
| 240151_at    | HOXB-AS3        | -0,741668563 | -1,332017329 | 0,590348766 |  |
| 216971_s_at  | PLEC            | -0,089689931 | -0,679763839 | 0,590073908 |  |
| 225163_at    | FRMD4A          | -0,089689931 | -0,679763839 | 0,590073908 |  |
| 203132_at    | RB1             | 4,28697245   | 3,697038015  | 0,589934435 |  |
| 204001_at    | SNAPC3          | 0,900083947  | 0,310717132  | 0,589366815 |  |
| 216321_s_at  | NR3C1           | 2,808702036  | 2,21959457   | 0,589107466 |  |
| 1558233_s_at | ATF1            | 3,410096504  | 2,821324225  | 0,588772279 |  |
| 1563654_at   | C8orf66         | -1,026571149 | -1,615132408 | 0,588561259 |  |
| 1568643_a_at | -               | -1,026571149 | -1,615132408 | 0,588561259 |  |
| 205428_s_at  | CALB2           | -1,026571149 | -1,615132408 | 0,588561259 |  |
| 207463_x_at  | PRSS3           | -1,026571149 | -1,615132408 | 0,588561259 |  |
| 234406_at    | RGMA            | -1,026571149 | -1,615132408 | 0,588561259 |  |
| 237305_at    | -               | -1,026571149 | -1,615132408 | 0,588561259 |  |
| 238016_s_at  | -               | -1,026571149 | -1,615132408 | 0,588561259 |  |
| 240926_at    | LRCH3           | -1,026571149 | -1,615132408 | 0,588561259 |  |
| 241259_at    | GAB3            | -1,026571149 | -1,615132408 | 0,588561259 |  |
| 224416_s_at  | MED28           | 3,021441862  | 2,432926755  | 0,588515107 |  |
| 213990_s_at  | PAK7            | 0,052199481  | -0,536087151 | 0,588286631 |  |

|              |          |              |              |             |  |
|--------------|----------|--------------|--------------|-------------|--|
| 226614_s_at  | FAM167A  | 0,052199481  | -0,536087151 | 0,588286631 |  |
| 242857_at    | -        | 0,052199481  | -0,536087151 | 0,588286631 |  |
| 232517_s_at  | PRIC285  | 1,177702228  | 0,589657387  | 0,588044841 |  |
| 218951_s_at  | PLCXD1   | 2,981056773  | 2,39311332   | 0,587943453 |  |
| 231725_at    | PCDHB2   | 0,792179257  | 0,204310755  | 0,587868501 |  |
| 36612_at     | FAM168A  | 1,148825584  | 0,56119757   | 0,587628015 |  |
| 206437_at    | S1PR4    | 0,541261317  | -0,046302147 | 0,587563464 |  |
| 243730_at    | -        | 0,541261317  | -0,046302147 | 0,587563464 |  |
| 210082_at    | ABCA4    | 0,020670649  | -0,566887459 | 0,587558109 |  |
| 229814_at    | -        | 0,020670649  | -0,566887459 | 0,587558109 |  |
| 216378_at    | -        | -2,551294263 | -3,138626879 | 0,587332616 |  |
| 243211_at    | -        | -2,551294263 | -3,138626879 | 0,587332616 |  |
| 202393_s_at  | KLF10    | 5,127212336  | 4,540112936  | 0,587099399 |  |
| 229036_at    | TNRC6B   | 1,104397092  | 0,51742585   | 0,586971241 |  |
| 1561883_at   | -        | -0,423248115 | -1,010192375 | 0,58694426  |  |
| 205014_at    | FGFBP1   | -0,423248115 | -1,010192375 | 0,58694426  |  |
| 210306_at    | L3MBTL1  | -0,423248115 | -1,010192375 | 0,58694426  |  |
| 225102_at    | MGLL     | -0,423248115 | -1,010192375 | 0,58694426  |  |
| 233122_at    | KRTCAP2  | -0,423248115 | -1,010192375 | 0,58694426  |  |
| 238270_x_at  | -        | -0,423248115 | -1,010192375 | 0,58694426  |  |
| 210601_at    | CDH6     | -0,325749314 | -0,912331589 | 0,586582275 |  |
| 211210_x_at  | SH2D1A   | -0,325749314 | -0,912331589 | 0,586582275 |  |
| 212703_at    | TLN2     | -0,325749314 | -0,912331589 | 0,586582275 |  |
| 216159_s_at  | -        | -0,325749314 | -0,912331589 | 0,586582275 |  |
| 219509_at    | MYOZ1    | -0,325749314 | -0,912331589 | 0,586582275 |  |
| 221385_s_at  | FFAR3    | -0,325749314 | -0,912331589 | 0,586582275 |  |
| 226504_at    | FAM109B  | -0,325749314 | -0,912331589 | 0,586582275 |  |
| 236146_at    | SYNCRIP  | -0,325749314 | -0,912331589 | 0,586582275 |  |
| 244688_at    | -        | -0,325749314 | -0,912331589 | 0,586582275 |  |
| 226873_at    | FAM63B   | 0,853119696  | 0,26733076   | 0,585788936 |  |
| 208841_s_at  | G3BP2    | 5,381596876  | 4,796236302  | 0,585360575 |  |
| 1553885_x_at | ZNF99    | -0,234278768 | -0,819238336 | 0,584959569 |  |
| 215844_at    | TNPO2    | -0,234278768 | -0,819238336 | 0,584959569 |  |
| 217469_at    | IGHA1    | -0,234278768 | -0,819238336 | 0,584959569 |  |
| 231480_at    | SLC6A19  | -0,234278768 | -0,819238336 | 0,584959569 |  |
| 238120_at    | RPH3AL   | -0,234278768 | -0,819238336 | 0,584959569 |  |
| 1557593_at   | SPAG17   | -2,262747984 | -2,847001814 | 0,58425383  |  |
| 1568554_x_at | -        | -2,262747984 | -2,847001814 | 0,58425383  |  |
| 240704_at    | -        | -2,262747984 | -2,847001814 | 0,58425383  |  |
| 242181_at    | -        | -2,262747984 | -2,847001814 | 0,58425383  |  |
| 1555974_a_at | -        | -0,366776884 | -0,950686014 | 0,583909131 |  |
| 237041_x_at  | RCOR1    | -0,366776884 | -0,950686014 | 0,583909131 |  |
| 240689_at    | C15orf60 | -0,366776884 | -0,950686014 | 0,583909131 |  |
| 1556690_s_at | -        | -0,467091869 | -1,050406615 | 0,583314746 |  |
| 228472_at    | CCDC61   | -0,467091869 | -1,050406615 | 0,583314746 |  |
| 237931_at    | -        | -0,467091869 | -1,050406615 | 0,583314746 |  |
| 244391_at    | TSEN2    | 0,503742507  | -0,079522948 | 0,583265455 |  |
| 209920_at    | BMPR2    | -0,148196756 | -0,730778808 | 0,582582052 |  |
| 216409_at    | ACSL6    | -0,148196756 | -0,730778808 | 0,582582052 |  |
| 224221_s_at  | VAV3     | -0,148196756 | -0,730778808 | 0,582582052 |  |
| 241417_at    | -        | -0,148196756 | -0,730778808 | 0,582582052 |  |
| 205695_at    | SDS      | 0,661985843  | 0,079428135  | 0,582557707 |  |
| 215930_s_at  | CTAGE5   | 0,661985843  | 0,079428135  | 0,582557707 |  |
| 226261_at    | ZNRF2    | 1,369290453  | 0,786897721  | 0,582392731 |  |
| 205505_at    | GCNT1    | 2,724770722  | 2,14244844   | 0,582322283 |  |
| 205923_at    | RELN     | 0,641402394  | 0,059218869  | 0,582183526 |  |

|              |                  |              |              |             |  |
|--------------|------------------|--------------|--------------|-------------|--|
| 220535_at    | FAM90A1          | 0,641402394  | 0,059218869  | 0,582183526 |  |
| 1562540_at   | LOC339978        | -0,79540287  | -1,377419394 | 0,582016524 |  |
| 1565858_at   | SNORA71A         | -0,79540287  | -1,377419394 | 0,582016524 |  |
| 210888_s_at  | ITIH1            | -0,79540287  | -1,377419394 | 0,582016524 |  |
| 218501_at    | ARHGEF3          | -0,79540287  | -1,377419394 | 0,582016524 |  |
| 231859_at    | C14orf132        | -0,79540287  | -1,377419394 | 0,582016524 |  |
| 234796_at    | CABP7            | -0,79540287  | -1,377419394 | 0,582016524 |  |
| 238359_at    | -                | -0,79540287  | -1,377419394 | 0,582016524 |  |
| 225861_at    | FAM195A          | 3,541801785  | 2,959949103  | 0,581852682 |  |
| 230297_x_at  | SYNGAP1          | 0,934330293  | 0,352836757  | 0,581493536 |  |
| 235610_at    | ALKBH8           | 1,621313976  | 1,039887232  | 0,581426745 |  |
| 232616_at    | LOC100129935     | -0,033456564 | -0,614371577 | 0,580915012 |  |
| 223577_x_at  | MALAT1           | 3,152077493  | 2,571362843  | 0,580714649 |  |
| 221185_s_at  | IQCG             | 0,555999837  | -0,024572586 | 0,580572423 |  |
| 216164_at    | LRRN2            | 0,359971644  | -0,220592223 | 0,580563867 |  |
| 232335_at    | -                | 0,359971644  | -0,220592223 | 0,580563867 |  |
| 1555358_a_at | ENTPD4           | -0,57445847  | -1,154897679 | 0,580439209 |  |
| 1557279_at   | ITSN1            | -0,57445847  | -1,154897679 | 0,580439209 |  |
| 232391_at    | ZNF461           | -0,57445847  | -1,154897679 | 0,580439209 |  |
| 243911_at    | -                | -0,57445847  | -1,154897679 | 0,580439209 |  |
| 1560148_at   | -                | -2,597496523 | -3,177802286 | 0,580305763 |  |
| 1568647_at   | LOC100505851     | -2,597496523 | -3,177802286 | 0,580305763 |  |
| 241126_at    | -                | -2,597496523 | -3,177802286 | 0,580305763 |  |
| 206342_x_at  | IDS              | 0,533835206  | -0,046302147 | 0,580137353 |  |
| 218913_s_at  | GMIP             | 0,533835206  | -0,046302147 | 0,580137353 |  |
| 1564637_a_at | FAM98B           | 3,294008537  | 2,713921281  | 0,580087256 |  |
| 212475_at    | AVL9             | 0,95671774   | 0,377530647  | 0,579187093 |  |
| 226868_at    | GXYLT1           | 1,894952274  | 1,315948728  | 0,579003545 |  |
| 212393_at    | SBF1             | 1,073999308  | 0,495031851  | 0,578967457 |  |
| 1569348_at   | MIR4500HG /// T  | -2,311268652 | -2,89013181  | 0,578863159 |  |
| 207342_at    | CNGB1            | -2,311268652 | -2,89013181  | 0,578863159 |  |
| 220220_at    | LRRC37A4P        | -2,311268652 | -2,89013181  | 0,578863159 |  |
| 233162_at    | -                | -2,311268652 | -2,89013181  | 0,578863159 |  |
| 236365_at    | AMACR            | -2,311268652 | -2,89013181  | 0,578863159 |  |
| 242426_at    | NRG4             | -2,311268652 | -2,89013181  | 0,578863159 |  |
| 201065_s_at  | GTF2I /// GTF2IP | 4,354920338  | 3,77655538   | 0,578364958 |  |
| 203852_s_at  | SMN1 /// SMN2    | 3,954344268  | 3,376085218  | 0,57825905  |  |
| 233014_at    | -                | 0,44160593   | -0,136643983 | 0,578249912 |  |
| 1553407_at   | MACF1            | -1,2845686   | -1,862647763 | 0,578079162 |  |
| 1559421_at   | SNED1            | -1,2845686   | -1,862647763 | 0,578079162 |  |
| 1564274_at   | C9orf47          | -1,2845686   | -1,862647763 | 0,578079162 |  |
| 1569146_s_at | KIAA0408 /// SOX | -1,2845686   | -1,862647763 | 0,578079162 |  |
| 205439_at    | GSTT2            | -1,2845686   | -1,862647763 | 0,578079162 |  |
| 206350_at    | APCS             | -1,2845686   | -1,862647763 | 0,578079162 |  |
| 217594_at    | ZCCHC11          | -1,2845686   | -1,862647763 | 0,578079162 |  |
| 218790_s_at  | TMLHE            | -1,2845686   | -1,862647763 | 0,578079162 |  |
| 220101_x_at  | -                | -1,2845686   | -1,862647763 | 0,578079162 |  |
| 222323_at    | -                | -1,2845686   | -1,862647763 | 0,578079162 |  |
| 239675_at    | LOC283143        | -1,2845686   | -1,862647763 | 0,578079162 |  |
| 240973_s_at  | -                | -1,2845686   | -1,862647763 | 0,578079162 |  |
| 244143_at    | -                | -1,2845686   | -1,862647763 | 0,578079162 |  |
| 225847_at    | NCEH1            | 1,69307511   | 1,115234684  | 0,577840426 |  |
| 204908_s_at  | BCL3             | 0,228146222  | -0,34958478  | 0,577731002 |  |
| 232310_at    | LOC100507637     | 0,228146222  | -0,34958478  | 0,577731002 |  |
| 208701_at    | APLP2            | 0,87091093   | 0,293518836  | 0,577392094 |  |
| 203815_at    | GSTT1            | 0,995078803  | 0,417770464  | 0,577308339 |  |



|              |                  |              |              |             |  |
|--------------|------------------|--------------|--------------|-------------|--|
| 1558014_s_at | FAR1             | 2,382221458  | 1,805902329  | 0,576319128 |  |
| 206989_s_at  | SCAF11           | 3,941773349  | 3,365837114  | 0,575936234 |  |
| 1320_at      | PTPN21           | -1,124406268 | -1,700258111 | 0,575851843 |  |
| 209211_at    | KLF5             | 0,496120222  | -0,079522948 | 0,57564317  |  |
| 217540_at    | NXPE3            | 0,496120222  | -0,079522948 | 0,57564317  |  |
| 241366_at    | LOC389458 /// R  | 0,317354302  | -0,258114234 | 0,575468536 |  |
| 217915_s_at  | RSL24D1          | 5,643563313  | 5,068098141  | 0,575465172 |  |
| 210635_s_at  | KLHL20           | 0,911589958  | 0,336136178  | 0,575453781 |  |
| 211080_s_at  | NEK2             | 1,331241794  | 0,755840599  | 0,575401195 |  |
| 223921_s_at  | GBA2             | 1,655931423  | 1,080561626  | 0,575369797 |  |
| 206157_at    | PTX3             | 2,734521183  | 2,159161028  | 0,575360155 |  |
| 218067_s_at  | ARGLU1           | 5,116377229  | 4,541024081  | 0,575353148 |  |
| 212136_at    | ATP2B4           | 3,137452663  | 2,562416132  | 0,575036531 |  |
| 211967_at    | TMEM123          | 4,932352627  | 4,357702907  | 0,57464972  |  |
| 1552829_at   | -                | -1,089016378 | -1,663414495 | 0,574398117 |  |
| 1558525_at   | -                | -1,089016378 | -1,663414495 | 0,574398117 |  |
| 1559195_at   | -                | -1,089016378 | -1,663414495 | 0,574398117 |  |
| 1559291_at   | LINC00032        | -1,089016378 | -1,663414495 | 0,574398117 |  |
| 205776_at    | FMO5             | -1,089016378 | -1,663414495 | 0,574398117 |  |
| 208381_s_at  | SGPL1            | -1,089016378 | -1,663414495 | 0,574398117 |  |
| 221081_s_at  | DENND2D          | -1,089016378 | -1,663414495 | 0,574398117 |  |
| 228339_at    | ECSCR            | -1,089016378 | -1,663414495 | 0,574398117 |  |
| 232418_at    | LZTFL1           | -1,089016378 | -1,663414495 | 0,574398117 |  |
| 238232_at    | -                | -1,089016378 | -1,663414495 | 0,574398117 |  |
| 208893_s_at  | DUSP6            | 3,159334685  | 2,585563171  | 0,573771514 |  |
| 1556009_at   | PEX13            | 1,05337236   | 0,479907041  | 0,573465319 |  |
| 32540_at     | PPP3CC           | -0,584387095 | -1,157156127 | 0,572769032 |  |
| 1555632_at   | PIK3IP1          | -0,85085127  | -1,423348341 | 0,572497072 |  |
| 205499_at    | SRPX2            | -0,85085127  | -1,423348341 | 0,572497072 |  |
| 206666_at    | GZMK             | -0,85085127  | -1,423348341 | 0,572497072 |  |
| 207137_at    | TONSL            | -0,85085127  | -1,423348341 | 0,572497072 |  |
| 208145_at    | -                | -0,85085127  | -1,423348341 | 0,572497072 |  |
| 240371_at    | LOC647107        | -0,85085127  | -1,423348341 | 0,572497072 |  |
| 241318_at    | -                | -0,85085127  | -1,423348341 | 0,572497072 |  |
| 1554953_a_at | C21orf90         | -0,43775896  | -1,010192375 | 0,572433415 |  |
| 1556620_at   | -                | -0,43775896  | -1,010192375 | 0,572433415 |  |
| 1569713_at   | SEC24B-AS1       | -0,43775896  | -1,010192375 | 0,572433415 |  |
| 233977_at    | GREB1L           | -0,43775896  | -1,010192375 | 0,572433415 |  |
| 238598_s_at  | -                | -0,43775896  | -1,010192375 | 0,572433415 |  |
| 241045_at    | KDM8             | -0,43775896  | -1,010192375 | 0,572433415 |  |
| 1556658_a_at | -                | -0,759588698 | -1,332017329 | 0,572428631 |  |
| 1557664_at   | LOC340239        | -0,759588698 | -1,332017329 | 0,572428631 |  |
| 1566696_at   | -                | -0,759588698 | -1,332017329 | 0,572428631 |  |
| 215986_at    | -                | -0,759588698 | -1,332017329 | 0,572428631 |  |
| 225186_at    | RAPH1            | -0,759588698 | -1,332017329 | 0,572428631 |  |
| 227631_at    | ABI2             | -0,759588698 | -1,332017329 | 0,572428631 |  |
| 231459_at    | LOC100506397     | -0,759588698 | -1,332017329 | 0,572428631 |  |
| 231467_at    | -                | -0,759588698 | -1,332017329 | 0,572428631 |  |
| 1553618_at   | TRIM43 /// TRIM4 | -1,71423189  | -2,286583451 | 0,572351561 |  |
| 1557807_a_at | -                | -1,71423189  | -2,286583451 | 0,572351561 |  |
| 1564805_a_at | OFCC1            | -1,71423189  | -2,286583451 | 0,572351561 |  |
| 1566256_s_at | GPR180           | -1,71423189  | -2,286583451 | 0,572351561 |  |
| 202878_s_at  | CD93             | -1,71423189  | -2,286583451 | 0,572351561 |  |
| 206254_at    | EGF              | -1,71423189  | -2,286583451 | 0,572351561 |  |
| 219955_at    | L1TD1            | -1,71423189  | -2,286583451 | 0,572351561 |  |
| 227048_at    | LAMA1            | -1,71423189  | -2,286583451 | 0,572351561 |  |

|              |           |              |              |             |  |
|--------------|-----------|--------------|--------------|-------------|--|
| 229747_x_at  | LOC146880 | -1,71423189  | -2,286583451 | 0,572351561 |  |
| 231231_at    | -         | -1,71423189  | -2,286583451 | 0,572351561 |  |
| 234271_at    | OTOP2     | -1,71423189  | -2,286583451 | 0,572351561 |  |
| 234566_at    | -         | -1,71423189  | -2,286583451 | 0,572351561 |  |
| 240703_s_at  | HERC1     | -1,71423189  | -2,286583451 | 0,572351561 |  |
| 208876_s_at  | PAK2      | 1,104397092  | 0,532164371  | 0,572232721 |  |
| 225555_x_at  | AURKAIP1  | 1,104397092  | 0,532164371  | 0,572232721 |  |
| 1556436_at   | EXTL3-AS1 | -1,639579028 | -2,211750327 | 0,572171299 |  |
| 1557753_at   | -         | -1,639579028 | -2,211750327 | 0,572171299 |  |
| 1566737_at   | LOC728716 | -1,639579028 | -2,211750327 | 0,572171299 |  |
| 219896_at    | CALY      | -1,639579028 | -2,211750327 | 0,572171299 |  |
| 221254_s_at  | PITPNM3   | -1,639579028 | -2,211750327 | 0,572171299 |  |
| 230317_x_at  | TMCO3     | -1,639579028 | -2,211750327 | 0,572171299 |  |
| 238263_at    | EPHA1-AS1 | -1,639579028 | -2,211750327 | 0,572171299 |  |
| 226540_at    | CCDC42B   | 0,181384709  | -0,39061235  | 0,571997059 |  |
| 227928_at    | PARPBP    | 2,197169074  | 1,6252386    | 0,571930474 |  |
| 1560023_x_at | -         | -1,763254337 | -2,335104118 | 0,571849781 |  |
| 1563260_at   | LINC00587 | -1,763254337 | -2,335104118 | 0,571849781 |  |
| 202437_s_at  | CYP1B1    | -1,763254337 | -2,335104118 | 0,571849781 |  |
| 216502_at    | ISG20L2   | -1,763254337 | -2,335104118 | 0,571849781 |  |
| 221361_at    | OMP       | -1,763254337 | -2,335104118 | 0,571849781 |  |
| 223899_at    | C3orf78   | -1,763254337 | -2,335104118 | 0,571849781 |  |
| 228004_at    | LINC00261 | -1,763254337 | -2,335104118 | 0,571849781 |  |
| 230596_at    | -         | -1,763254337 | -2,335104118 | 0,571849781 |  |
| 241181_x_at  | -         | -1,763254337 | -2,335104118 | 0,571849781 |  |
| 242061_at    | -         | -1,763254337 | -2,335104118 | 0,571849781 |  |
| 32088_at     | BLZF1     | 0,181391373  | -0,390416179 | 0,571807552 |  |
| 209427_at    | SMTN      | 1,339784194  | 0,768343791  | 0,571440404 |  |
| 231995_at    | CAAP1     | 2,305800198  | 1,73441697   | 0,571383228 |  |
| 1560964_at   | -         | -1,591296941 | -2,162639771 | 0,57134283  |  |
| 1561508_at   | -         | -1,591296941 | -2,162639771 | 0,57134283  |  |
| 1561612_at   | -         | -1,591296941 | -2,162639771 | 0,57134283  |  |
| 1564474_at   | ZBED3-AS1 | -1,591296941 | -2,162639771 | 0,57134283  |  |
| 206806_at    | DGKI      | -1,591296941 | -2,162639771 | 0,57134283  |  |
| 230302_at    | -         | -1,591296941 | -2,162639771 | 0,57134283  |  |
| 231390_at    | -         | -1,591296941 | -2,162639771 | 0,57134283  |  |
| 231676_s_at  | -         | -1,591296941 | -2,162639771 | 0,57134283  |  |
| 231737_at    | CACNG4    | -1,591296941 | -2,162639771 | 0,57134283  |  |
| 236731_at    | LUZP3P    | -1,591296941 | -2,162639771 | 0,57134283  |  |
| 238182_at    | -         | -1,591296941 | -2,162639771 | 0,57134283  |  |
| 226060_at    | RFT1      | 1,865674241  | 1,294497133  | 0,571177108 |  |
| 1555269_a_at | ANO1      | 0,152582607  | -0,41858459  | 0,571167196 |  |
| 207890_s_at  | MMP25     | 0,152582607  | -0,41858459  | 0,571167196 |  |
| 208115_x_at  | C10orf137 | 0,152582607  | -0,41858459  | 0,571167196 |  |
| 231830_x_at  | RAB11FIP1 | 0,152582607  | -0,41858459  | 0,571167196 |  |
| 232417_x_at  | ZDHHC11   | 0,728550685  | 0,157549243  | 0,571001442 |  |
| 204325_s_at  | NF1       | -0,285837228 | -0,855751026 | 0,569913798 |  |
| 205431_s_at  | BMP5      | -0,285837228 | -0,855751026 | 0,569913798 |  |
| 220241_at    | TMCO3     | -0,285837228 | -0,855751026 | 0,569913798 |  |
| 222225_at    | RPL23AP53 | -0,285837228 | -0,855751026 | 0,569913798 |  |
| 232509_at    | PDE4DIP   | -0,285837228 | -0,855751026 | 0,569913798 |  |
| 239728_at    | -         | -0,285837228 | -0,855751026 | 0,569913798 |  |
| 1554306_at   | ITPKB     | -1,838812296 | -2,408705138 | 0,569892841 |  |
| 1555472_at   | SORBS2    | -1,838812296 | -2,408705138 | 0,569892841 |  |
| 1556469_s_at | -         | -1,838812296 | -2,408705138 | 0,569892841 |  |
| 1562629_a_at | KRT40     | -1,838812296 | -2,408705138 | 0,569892841 |  |

|              |                  |              |              |             |  |
|--------------|------------------|--------------|--------------|-------------|--|
| 1565597_at   | -                | -1,838812296 | -2,408705138 | 0,569892841 |  |
| 1569673_at   | -                | -1,838812296 | -2,408705138 | 0,569892841 |  |
| 215316_at    | -                | -1,838812296 | -2,408705138 | 0,569892841 |  |
| 216372_at    | -                | -1,838812296 | -2,408705138 | 0,569892841 |  |
| 220431_at    | TMPRSS11E        | -1,838812296 | -2,408705138 | 0,569892841 |  |
| 233309_at    | -                | -1,838812296 | -2,408705138 | 0,569892841 |  |
| 238550_at    | RUFY2            | -1,838812296 | -2,408705138 | 0,569892841 |  |
| 1568877_a_at | ACBD5            | -0,543051993 | -1,112851844 | 0,569799851 |  |
| 208212_s_at  | ALK              | -0,543051993 | -1,112851844 | 0,569799851 |  |
| 215407_s_at  | ASTN2            | -0,543051993 | -1,112851844 | 0,569799851 |  |
| 220825_s_at  | KIRREL           | -0,543051993 | -1,112851844 | 0,569799851 |  |
| 224476_s_at  | MESP1            | -0,543051993 | -1,112851844 | 0,569799851 |  |
| 235110_at    | PLA2G16          | -0,543051993 | -1,112851844 | 0,569799851 |  |
| 236260_at    | LOC100287598     | -0,543051993 | -1,112851844 | 0,569799851 |  |
| 1553721_at   | RNF152           | -2,384869671 | -2,954576755 | 0,569707084 |  |
| 1554675_a_at | SYCE1            | -2,384869671 | -2,954576755 | 0,569707084 |  |
| 1559901_s_at | LINC00478        | -2,384869671 | -2,954576755 | 0,569707084 |  |
| 201430_s_at  | DPYSL3           | -2,384869671 | -2,954576755 | 0,569707084 |  |
| 209816_at    | PTCH1            | -2,384869671 | -2,954576755 | 0,569707084 |  |
| 230323_s_at  | TMEM45B          | -2,384869671 | -2,954576755 | 0,569707084 |  |
| 204569_at    | ICK              | 0,792179257  | 0,222599095  | 0,569580162 |  |
| 235659_at    | -                | 1,62481334   | 1,055274826  | 0,569538514 |  |
| 1562914_a_at | FLJ25328         | 0,246434561  | -0,322870281 | 0,569304842 |  |
| 208089_s_at  | TDRD3            | 0,246434561  | -0,322870281 | 0,569304842 |  |
| 210787_s_at  | CAMKK2           | 0,246434561  | -0,322870281 | 0,569304842 |  |
| 216044_x_at  | FAM69A           | 0,246434561  | -0,322870281 | 0,569304842 |  |
| 217198_x_at  | IGH@ /// IGHA2 / | 0,246434561  | -0,322870281 | 0,569304842 |  |
| 226322_at    | TMTC1            | 0,246434561  | -0,322870281 | 0,569304842 |  |
| 1560101_at   | SYDE2            | -2,667025278 | -3,236070201 | 0,569044923 |  |
| 1559073_at   | KDM4B            | -1,518072576 | -2,086984744 | 0,568912168 |  |
| 1561741_at   | -                | -1,518072576 | -2,086984744 | 0,568912168 |  |
| 206771_at    | UPK3A            | -1,518072576 | -2,086984744 | 0,568912168 |  |
| 210319_x_at  | MSX2             | -1,518072576 | -2,086984744 | 0,568912168 |  |
| 226654_at    | MUC12            | -1,518072576 | -2,086984744 | 0,568912168 |  |
| 228110_x_at  | -                | -1,518072576 | -2,086984744 | 0,568912168 |  |
| 229133_s_at  | ZNF397           | -1,518072576 | -2,086984744 | 0,568912168 |  |
| 230384_at    | ANKRD23          | -1,518072576 | -2,086984744 | 0,568912168 |  |
| 235161_at    | LOC100506451     | -1,518072576 | -2,086984744 | 0,568912168 |  |
| 236415_at    | DENND5B          | -1,518072576 | -2,086984744 | 0,568912168 |  |
| 236446_at    | -                | -1,518072576 | -2,086984744 | 0,568912168 |  |
| 239786_at    | -                | -1,518072576 | -2,086984744 | 0,568912168 |  |
| 240551_at    | ZBTB45           | -1,518072576 | -2,086984744 | 0,568912168 |  |
| 240722_at    | LOC100505838     | -1,518072576 | -2,086984744 | 0,568912168 |  |
| 207323_s_at  | MBP              | -0,196756757 | -0,765504029 | 0,568747272 |  |
| 234753_x_at  | -                | -0,196756757 | -0,765504029 | 0,568747272 |  |
| 221568_s_at  | LIN7C            | 4,379468341  | 3,810956512  | 0,568511829 |  |
| 214848_at    | YWHAZ            | 0,962260738  | 0,393761504  | 0,568499234 |  |
| 1554042_s_at | TMEM239          | -0,078265071 | -0,646746079 | 0,568481007 |  |
| 1562733_at   | LINC00092        | -0,078265071 | -0,646746079 | 0,568481007 |  |
| 204152_s_at  | MFNG             | -0,078265071 | -0,646746079 | 0,568481007 |  |
| 234086_at    | -                | -0,078265071 | -0,646746079 | 0,568481007 |  |
| 235483_at    | STX3             | -0,078265071 | -0,646746079 | 0,568481007 |  |
| 214724_at    | DIXDC1           | 1,04816921   | 0,479907041  | 0,568262169 |  |
| 1555710_at   | -                | -2,779459409 | -3,347710726 | 0,568251317 |  |
| 1555291_at   | TRPV3            | -1,888254346 | -2,456406426 | 0,56815208  |  |
| 1559607_s_at | GBP6             | -1,888254346 | -2,456406426 | 0,56815208  |  |

|              |                 |              |              |             |  |
|--------------|-----------------|--------------|--------------|-------------|--|
| 1564070_s_at | HOTTIP          | -1,888254346 | -2,456406426 | 0,56815208  |  |
| 1564933_at   | -               | -1,888254346 | -2,456406426 | 0,56815208  |  |
| 228368_at    | ARHGAP20        | -1,888254346 | -2,456406426 | 0,56815208  |  |
| 238838_at    | TCERG1          | -1,888254346 | -2,456406426 | 0,56815208  |  |
| 225290_at    | ETNK1           | 2,182996494  | 1,614891062  | 0,568105433 |  |
| 225471_s_at  | AKT2            | 3,22766727   | 2,659583735  | 0,568083534 |  |
| 203603_s_at  | ZEB2            | 3,393780562  | 2,825817328  | 0,567963233 |  |
| 1555076_at   | ARHGAP25        | -0,926850548 | -1,494668682 | 0,567818133 |  |
| 207938_at    | PI15            | -0,926850548 | -1,494668682 | 0,567818133 |  |
| 211322_s_at  | SARDH           | -0,926850548 | -1,494668682 | 0,567818133 |  |
| 215142_at    | CXorf27         | -0,926850548 | -1,494668682 | 0,567818133 |  |
| 220863_at    | MIP             | -0,926850548 | -1,494668682 | 0,567818133 |  |
| 222720_x_at  | C1orf27         | -0,926850548 | -1,494668682 | 0,567818133 |  |
| 244245_at    | ANKRD9          | -0,926850548 | -1,494668682 | 0,567818133 |  |
| 1554849_at   | TOR1A           | -1,047650486 | -1,615132408 | 0,567481922 |  |
| 207314_x_at  | KIR3DL2 /// LOC | -1,047650486 | -1,615132408 | 0,567481922 |  |
| 209550_at    | NDN             | -1,047650486 | -1,615132408 | 0,567481922 |  |
| 221289_at    | DLX6            | -1,047650486 | -1,615132408 | 0,567481922 |  |
| 233203_at    | ROPN1           | -1,047650486 | -1,615132408 | 0,567481922 |  |
| 225262_at    | FOSL2           | 1,191926657  | 0,624460759  | 0,567465897 |  |
| 204954_s_at  | DYRK1B          | 0,03125738   | -0,536087151 | 0,567344531 |  |
| 209757_s_at  | MYCN            | 0,46522187   | -0,102100538 | 0,567322408 |  |
| 244307_s_at  | LOC100507539    | 0,46522187   | -0,102100538 | 0,567322408 |  |
| 211818_s_at  | PDE4C           | -0,112808516 | -0,679763839 | 0,566955323 |  |
| 229966_at    | EWSR1           | -0,112808516 | -0,679763839 | 0,566955323 |  |
| 242569_at    | STAM2           | 0,30867765   | -0,258114234 | 0,566791884 |  |
| 1558948_a_at | -               | -1,470833215 | -2,037551727 | 0,566718511 |  |
| 1559427_at   | MCF2L           | -1,470833215 | -2,037551727 | 0,566718511 |  |
| 1567271_at   | OR4C1P          | -1,470833215 | -2,037551727 | 0,566718511 |  |
| 1568903_at   | -               | -1,470833215 | -2,037551727 | 0,566718511 |  |
| 205385_at    | MDM2            | -1,470833215 | -2,037551727 | 0,566718511 |  |
| 208292_at    | BMP10           | -1,470833215 | -2,037551727 | 0,566718511 |  |
| 215166_at    | IGSF9B          | -1,470833215 | -2,037551727 | 0,566718511 |  |
| 222346_at    | LAMA1           | -1,470833215 | -2,037551727 | 0,566718511 |  |
| 235650_at    | CDHR3 /// LOC10 | -1,470833215 | -2,037551727 | 0,566718511 |  |
| 239242_at    | SLC25A5-AS1     | -1,470833215 | -2,037551727 | 0,566718511 |  |
| 1553719_s_at | ZNF548          | 0,67554678   | 0,109221392  | 0,566325388 |  |
| 222741_s_at  | SAYSD1          | 2,632180155  | 2,066015817  | 0,566164338 |  |
| 1554478_a_at | HEATR3          | -0,00073712  | -0,566887459 | 0,566150339 |  |
| 1562924_at   | LOC340357       | -0,00073712  | -0,566887459 | 0,566150339 |  |
| 233182_x_at  | ATXN3           | -0,00073712  | -0,566887459 | 0,566150339 |  |
| 237744_at    | -               | -0,00073712  | -0,566887459 | 0,566150339 |  |
| 219105_x_at  | ORC6            | 4,506303097  | 3,940211012  | 0,566092085 |  |
| 1553811_at   | FAM222A-AS1     | -1,937711681 | -2,503677622 | 0,565965941 |  |
| 1557403_s_at | -               | -1,937711681 | -2,503677622 | 0,565965941 |  |
| 1561096_at   | LOC285419       | -1,937711681 | -2,503677622 | 0,565965941 |  |
| 222835_at    | THSD4           | -1,937711681 | -2,503677622 | 0,565965941 |  |
| 227061_at    | -               | -1,937711681 | -2,503677622 | 0,565965941 |  |
| 233096_at    | KIAA1109        | -1,937711681 | -2,503677622 | 0,565965941 |  |
| 235467_s_at  | KCNC4           | -1,937711681 | -2,503677622 | 0,565965941 |  |
| 233486_at    | -               | 0,859074518  | 0,293518836  | 0,565555683 |  |
| 218769_s_at  | ANKRA2          | 2,611163891  | 2,045615873  | 0,565548018 |  |
| 237817_at    | SSR3            | 0,518867317  | -0,046302147 | 0,565169464 |  |
| 1552997_a_at | IQCF1           | -0,59053611  | -1,154897679 | 0,564361568 |  |
| 1556864_at   | TCTN1           | -0,59053611  | -1,154897679 | 0,564361568 |  |
| 1557248_at   | ZNF587          | -0,59053611  | -1,154897679 | 0,564361568 |  |

|              |               |              |              |             |  |
|--------------|---------------|--------------|--------------|-------------|--|
| 1564630_at   | EDN1          | -0,59053611  | -1,154897679 | 0,564361568 |  |
| 215507_x_at  | -             | -0,59053611  | -1,154897679 | 0,564361568 |  |
| 216283_s_at  | PVR           | -0,59053611  | -1,154897679 | 0,564361568 |  |
| 222787_s_at  | TMEM106B      | -0,59053611  | -1,154897679 | 0,564361568 |  |
| 1557117_at   | -             | -1,173767127 | -1,738067356 | 0,564300229 |  |
| 1557879_at   | LOC100129175  | -1,173767127 | -1,738067356 | 0,564300229 |  |
| 1561097_at   | -             | -1,173767127 | -1,738067356 | 0,564300229 |  |
| 1561528_at   | -             | -1,173767127 | -1,738067356 | 0,564300229 |  |
| 234231_at    | CASP16        | -1,173767127 | -1,738067356 | 0,564300229 |  |
| 234505_at    | -             | -1,173767127 | -1,738067356 | 0,564300229 |  |
| 242153_at    | LARP1B        | -1,173767127 | -1,738067356 | 0,564300229 |  |
| 1557804_at   | -             | -0,655928373 | -1,220210588 | 0,564282215 |  |
| 1561258_at   | TMEM151B      | -0,655928373 | -1,220210588 | 0,564282215 |  |
| 1568924_a_at | IQUB          | -0,655928373 | -1,220210588 | 0,564282215 |  |
| 206112_at    | ANKRD7        | -0,655928373 | -1,220210588 | 0,564282215 |  |
| 206277_at    | P2RY2         | -0,655928373 | -1,220210588 | 0,564282215 |  |
| 209542_x_at  | IGF1          | -0,655928373 | -1,220210588 | 0,564282215 |  |
| 211053_at    | KCNG1         | -0,655928373 | -1,220210588 | 0,564282215 |  |
| 221968_s_at  | ZNF771        | -0,655928373 | -1,220210588 | 0,564282215 |  |
| 235194_at    | TPCN2         | -0,655928373 | -1,220210588 | 0,564282215 |  |
| 236189_at    | ANKRD50       | -0,655928373 | -1,220210588 | 0,564282215 |  |
| 207165_at    | HMMR          | 4,695400025  | 4,131407181  | 0,563992844 |  |
| 207387_s_at  | GK            | 1,764611101  | 1,200746069  | 0,563865031 |  |
| 233333_x_at  | AVIL          | 0,592200562  | 0,028364014  | 0,563836547 |  |
| 210963_s_at  | GYG2          | 0,072842263  | -0,490927335 | 0,563769598 |  |
| 219323_s_at  | IL18BP        | 0,072842263  | -0,490927335 | 0,563769598 |  |
| 1560662_s_at | WHAMMP2 /// W | -2,43257096  | -2,996335703 | 0,563764743 |  |
| 220351_at    | CCRL1         | -2,43257096  | -2,996335703 | 0,563764743 |  |
| 241365_at    | SATB1         | -2,43257096  | -2,996335703 | 0,563764743 |  |
| 209551_at    | YIPF4         | 1,844820248  | 1,281471383  | 0,563348865 |  |
| 229851_s_at  | C11orf54      | 2,44295215   | 1,879785595  | 0,563166554 |  |
| 225510_at    | OAF           | 1,331241794  | 0,768343791  | 0,562898003 |  |
| 230935_at    | LOC100506798  | 0,767063567  | 0,204310755  | 0,562752811 |  |
| 211607_x_at  | EGFR          | 0,171847695  | -0,39061235  | 0,562460046 |  |
| 244084_at    | AIFM3         | 0,171847695  | -0,39061235  | 0,562460046 |  |
| 232036_at    | KLC1          | 0,425644434  | -0,136643983 | 0,562288416 |  |
| 237747_at    | -             | 0,425644434  | -0,136643983 | 0,562288416 |  |
| 211547_s_at  | PAFAH1B1      | 1,094335495  | 0,532164371  | 0,562171124 |  |
| 237052_x_at  | GIGYF2        | 1,094335495  | 0,532164371  | 0,562171124 |  |
| 1556735_at   | -             | -1,399512875 | -1,961547147 | 0,562034272 |  |
| 1570571_at   | CCDC91        | -1,399512875 | -1,961547147 | 0,562034272 |  |
| 210366_at    | SLCO1B1       | -1,399512875 | -1,961547147 | 0,562034272 |  |
| 211490_at    | ADRA1A        | -1,399512875 | -1,961547147 | 0,562034272 |  |
| 220722_s_at  | SLC5A7        | -1,399512875 | -1,961547147 | 0,562034272 |  |
| 230864_at    | NIM1          | -1,399512875 | -1,961547147 | 0,562034272 |  |
| 234633_at    | KRTAP4-11     | -1,399512875 | -1,961547147 | 0,562034272 |  |
| 236264_at    | LPHN3         | -1,399512875 | -1,961547147 | 0,562034272 |  |
| 240184_at    | -             | -1,399512875 | -1,961547147 | 0,562034272 |  |
| 221014_s_at  | RAB33B        | 0,641402394  | 0,079428135  | 0,561974259 |  |
| 1554619_at   | MBLAC2        | -2,01371626  | -2,575129729 | 0,561413469 |  |
| 1560917_at   | -             | -2,01371626  | -2,575129729 | 0,561413469 |  |
| 1568755_a_at | -             | -2,01371626  | -2,575129729 | 0,561413469 |  |
| 1570272_at   | -             | -2,01371626  | -2,575129729 | 0,561413469 |  |
| 221444_at    | TAS2R16       | -2,01371626  | -2,575129729 | 0,561413469 |  |
| 222925_at    | DCDC2         | -2,01371626  | -2,575129729 | 0,561413469 |  |
| 213786_at    | TAX1BP1       | 1,841816345  | 1,281471383  | 0,560344962 |  |

|              |                  |              |              |             |  |
|--------------|------------------|--------------|--------------|-------------|--|
| 228047_at    | SNORA72          | 0,87091093   | 0,310717132  | 0,560193798 |  |
| 238406_x_at  | SEZ6L2           | 1,163336153  | 0,603679647  | 0,559656507 |  |
| 221757_at    | PIK3IP1          | 0,853119696  | 0,293518836  | 0,55960086  |  |
| 238147_at    | TRIM46           | 0,853119696  | 0,293518836  | 0,55960086  |  |
| 238551_at    | FUT11            | 0,457392764  | -0,102100538 | 0,559493302 |  |
| 242684_at    | ZNF425           | 0,457392764  | -0,102100538 | 0,559493302 |  |
| 207697_x_at  | LILRB2           | -0,259832361 | -0,819238336 | 0,559405975 |  |
| 233031_at    | ZEB2             | -0,259832361 | -0,819238336 | 0,559405975 |  |
| 206878_at    | DAO              | -0,352951799 | -0,912331589 | 0,55937979  |  |
| 221286_s_at  | MZB1             | -0,352951799 | -0,912331589 | 0,55937979  |  |
| 229932_at    | -                | -0,352951799 | -0,912331589 | 0,55937979  |  |
| 243017_at    | LOC158572        | -0,352951799 | -0,912331589 | 0,55937979  |  |
| 244737_at    | -                | -0,352951799 | -0,912331589 | 0,55937979  |  |
| 207850_at    | CXCL3            | 1,62481334   | 1,065442793  | 0,559370547 |  |
| 242370_at    | MTHFD2L          | 1,283332461  | 0,724100169  | 0,559232292 |  |
| 205913_at    | PLIN1            | 0,209623097  | -0,34958478  | 0,559207878 |  |
| 202422_s_at  | ACSL4            | 2,755423794  | 2,196649505  | 0,558774289 |  |
| 1559563_at   | -                | -0,055687482 | -0,614371577 | 0,558684095 |  |
| 205374_at    | SLN              | -0,055687482 | -0,614371577 | 0,558684095 |  |
| 210392_x_at  | NR6A1            | -0,055687482 | -0,614371577 | 0,558684095 |  |
| 225575_at    | LIFR             | -0,055687482 | -0,614371577 | 0,558684095 |  |
| 227710_s_at  | TPT1-AS1         | -0,055687482 | -0,614371577 | 0,558684095 |  |
| 232112_at    | RALGPS2          | -0,055687482 | -0,614371577 | 0,558684095 |  |
| 1559105_at   | LEKR1            | -1,353583928 | -1,912089812 | 0,558505884 |  |
| 1568876_a_at | -                | -1,353583928 | -1,912089812 | 0,558505884 |  |
| 207378_at    | TREH             | -1,353583928 | -1,912089812 | 0,558505884 |  |
| 207413_s_at  | SCN5A            | -1,353583928 | -1,912089812 | 0,558505884 |  |
| 208201_at    | DUX2 /// DUX3 // | -1,353583928 | -1,912089812 | 0,558505884 |  |
| 209983_s_at  | NRXN2            | -1,353583928 | -1,912089812 | 0,558505884 |  |
| 210723_x_at  | -                | -1,353583928 | -1,912089812 | 0,558505884 |  |
| 211272_s_at  | DGKA             | -1,353583928 | -1,912089812 | 0,558505884 |  |
| 230889_at    | LOC645321        | -1,353583928 | -1,912089812 | 0,558505884 |  |
| 239487_at    | -                | -1,353583928 | -1,912089812 | 0,558505884 |  |
| 242860_at    | -                | -1,353583928 | -1,912089812 | 0,558505884 |  |
| 244150_at    | -                | -1,353583928 | -1,912089812 | 0,558505884 |  |
| 244821_at    | -                | -1,353583928 | -1,912089812 | 0,558505884 |  |
| 235378_at    | FAM161B          | -0,172274514 | -0,730778808 | 0,558504294 |  |
| 1563945_at   | LOC284100        | 0,533835206  | -0,024572586 | 0,558407793 |  |
| 209875_s_at  | SPP1             | 0,533835206  | -0,024572586 | 0,558407793 |  |
| 203840_at    | BLZF1            | 1,434549838  | 0,876248481  | 0,558301357 |  |
| 1552736_a_at | NETO1            | -2,063149277 | -2,621331989 | 0,558182712 |  |
| 1559354_a_at | -                | -2,063149277 | -2,621331989 | 0,558182712 |  |
| 1563319_at   | -                | -2,063149277 | -2,621331989 | 0,558182712 |  |
| 208531_at    | SERPINA2         | -2,063149277 | -2,621331989 | 0,558182712 |  |
| 210108_at    | CACNA1D          | -2,063149277 | -2,621331989 | 0,558182712 |  |
| 216124_at    | -                | -2,063149277 | -2,621331989 | 0,558182712 |  |
| 229125_at    | KANK4            | -2,063149277 | -2,621331989 | 0,558182712 |  |
| 237550_at    | -                | -2,063149277 | -2,621331989 | 0,558182712 |  |
| 244022_at    | -                | -2,063149277 | -2,621331989 | 0,558182712 |  |
| 1556786_at   | PDE5A            | -2,479842156 | -3,037500868 | 0,557658712 |  |
| 204869_at    | PCSK2            | -2,479842156 | -3,037500868 | 0,557658712 |  |
| 244159_at    | -                | -2,479842156 | -3,037500868 | 0,557658712 |  |
| 226973_at    | VSTM2L           | 0,273439642  | -0,283667828 | 0,557107469 |  |
| 206537_at    | XIAP             | -0,706943342 | -1,264005341 | 0,557061999 |  |
| 208023_at    | TNFRSF4          | -0,706943342 | -1,264005341 | 0,557061999 |  |
| 228896_at    | -                | -0,706943342 | -1,264005341 | 0,557061999 |  |

|              |                  |              |              |             |  |
|--------------|------------------|--------------|--------------|-------------|--|
| 1565974_at   | -                | -0,089689931 | -0,646746079 | 0,557056147 |  |
| 217365_at    | PRAMEF11         | -0,089689931 | -0,646746079 | 0,557056147 |  |
| 220589_s_at  | ITFG2 /// LOC100 | -0,089689931 | -0,646746079 | 0,557056147 |  |
| 220764_at    | PPP4R2           | -0,089689931 | -0,646746079 | 0,557056147 |  |
| 229079_at    | EHMT2            | -0,089689931 | -0,646746079 | 0,557056147 |  |
| 229343_at    | GTSE1            | -0,089689931 | -0,646746079 | 0,557056147 |  |
| 230438_at    | TBX15            | -0,089689931 | -0,646746079 | 0,557056147 |  |
| 1560443_at   | -                | 0,020670649  | -0,536087151 | 0,5567578   |  |
| 226766_at    | ROBO2            | 0,020670649  | -0,536087151 | 0,5567578   |  |
| 226984_at    | FGD5             | 0,020670649  | -0,536087151 | 0,5567578   |  |
| 207863_at    | ADPRH            | -0,299034815 | -0,855751026 | 0,556716211 |  |
| 210080_x_at  | CELA3A           | -0,299034815 | -0,855751026 | 0,556716211 |  |
| 215454_x_at  | SFTPC            | -0,299034815 | -0,855751026 | 0,556716211 |  |
| 219853_at    | FKRP             | -0,299034815 | -0,855751026 | 0,556716211 |  |
| 224125_at    | PLEKHN1          | -0,299034815 | -0,855751026 | 0,556716211 |  |
| 234722_x_at  | OBP2B            | -0,299034815 | -0,855751026 | 0,556716211 |  |
| 235550_at    | MAP9             | -0,299034815 | -0,855751026 | 0,556716211 |  |
| 241774_at    | FLJ31306         | -0,299034815 | -0,855751026 | 0,556716211 |  |
| 213365_at    | ERI2             | 2,352981171  | 1,796776588  | 0,556204583 |  |
| 235459_at    | RNF41            | 0,359971644  | -0,19610998  | 0,556081624 |  |
| 1553517_at   | FERD3L           | -0,394749123 | -0,950686014 | 0,555936891 |  |
| 1562930_at   | SRRM2-AS1        | -0,394749123 | -0,950686014 | 0,555936891 |  |
| 204821_at    | BTN3A3           | -0,394749123 | -0,950686014 | 0,555936891 |  |
| 206369_s_at  | PIK3CG           | -0,394749123 | -0,950686014 | 0,555936891 |  |
| 209791_at    | PADI2            | -0,394749123 | -0,950686014 | 0,555936891 |  |
| 227676_at    | FAM3D            | -0,394749123 | -0,950686014 | 0,555936891 |  |
| 219784_at    | C16orf95         | 1,247462054  | 0,691645685  | 0,555816368 |  |
| 219121_s_at  | ESRP1            | -0,986356909 | -1,541908042 | 0,555551133 |  |
| 228912_at    | VIL1             | -0,986356909 | -1,541908042 | 0,555551133 |  |
| 230845_at    | HOXB-AS5         | -0,986356909 | -1,541908042 | 0,555551133 |  |
| 236324_at    | MBP              | -0,986356909 | -1,541908042 | 0,555551133 |  |
| 239172_x_at  | MDFIC            | -0,986356909 | -1,541908042 | 0,555551133 |  |
| 207014_at    | GABRA2           | -2,756478458 | -3,311072652 | 0,554594194 |  |
| 242033_at    | RNF180           | -2,756478458 | -3,311072652 | 0,554594194 |  |
| 1554978_at   | ERICH1-AS1       | -1,308181863 | -1,862647763 | 0,5544659   |  |
| 1564193_at   | FLJ39061 /// LOC | -1,308181863 | -1,862647763 | 0,5544659   |  |
| 207665_at    | ADAM21           | -1,308181863 | -1,862647763 | 0,5544659   |  |
| 210578_at    | TRIM10           | -1,308181863 | -1,862647763 | 0,5544659   |  |
| 214388_at    | -                | -1,308181863 | -1,862647763 | 0,5544659   |  |
| 215559_at    | ABCC6            | -1,308181863 | -1,862647763 | 0,5544659   |  |
| 243319_at    | -                | -1,308181863 | -1,862647763 | 0,5544659   |  |
| 218981_at    | ACN9             | 3,493810203  | 2,939363796  | 0,554446407 |  |
| 204302_s_at  | CTIF             | 0,417596971  | -0,136643983 | 0,554240953 |  |
| 232589_at    | LOC100506029 /   | 0,417596971  | -0,136643983 | 0,554240953 |  |
| 52651_at     | COL8A2           | -0,526600223 | -1,080731507 | 0,554131284 |  |
| 1569980_x_at | HKR1             | -0,496991414 | -1,050406615 | 0,553415201 |  |
| 213909_at    | LRRC15           | -0,496991414 | -1,050406615 | 0,553415201 |  |
| 214186_s_at  | HCG26            | -0,496991414 | -1,050406615 | 0,553415201 |  |
| 218808_at    | DALRD3           | -0,496991414 | -1,050406615 | 0,553415201 |  |
| 229103_at    | WNT3             | -0,496991414 | -1,050406615 | 0,553415201 |  |
| 238771_at    | -                | -0,496991414 | -1,050406615 | 0,553415201 |  |
| 240454_at    | -                | -0,496991414 | -1,050406615 | 0,553415201 |  |
| 201568_at    | UQCRQ            | 5,958628005  | 5,405319208  | 0,553308797 |  |
| 223261_at    | POLK             | 2,089851283  | 1,536652708  | 0,553198576 |  |
| 233809_at    | C15orf63         | 1,04816921   | 0,495031851  | 0,55313736  |  |
| 36920_at     | MTM1             | 0,162247775  | -0,390565597 | 0,552813372 |  |



|              |                 |              |              |             |  |
|--------------|-----------------|--------------|--------------|-------------|--|
| 212769_at    | TLE3            | 0,661985843  | 0,109221392  | 0,55276445  |  |
| 236691_at    | -               | 0,661985843  | 0,109221392  | 0,55276445  |  |
| 205191_at    | RP2             | 3,217273782  | 2,664608955  | 0,552664827 |  |
| 204041_at    | MAOB            | 1,789769151  | 1,23718272   | 0,552586431 |  |
| 236449_at    | CSTB            | 1,210676994  | 0,658444279  | 0,552232715 |  |
| 220762_s_at  | GNB1L           | 1,473887017  | 0,921731975  | 0,552155042 |  |
| 207913_at    | CYP2F1          | -2,138804305 | -2,690860744 | 0,552056439 |  |
| 210491_at    | -               | -2,138804305 | -2,690860744 | 0,552056439 |  |
| 210913_at    | CDH20           | -2,138804305 | -2,690860744 | 0,552056439 |  |
| 211492_s_at  | ADRA1A          | -2,138804305 | -2,690860744 | 0,552056439 |  |
| 216185_at    | FUT9            | -2,138804305 | -2,690860744 | 0,552056439 |  |
| 231911_at    | ERMN            | -2,138804305 | -2,690860744 | 0,552056439 |  |
| 233546_at    | LOC283075       | -2,138804305 | -2,690860744 | 0,552056439 |  |
| 234684_s_at  | KRTAP4-4        | -2,138804305 | -2,690860744 | 0,552056439 |  |
| 234943_at    | LOC400927       | -2,138804305 | -2,690860744 | 0,552056439 |  |
| 239479_x_at  | -               | -2,138804305 | -2,690860744 | 0,552056439 |  |
| 241875_at    | -               | -2,138804305 | -2,690860744 | 0,552056439 |  |
| 215073_s_at  | NR2F2           | 1,369290453  | 0,817300337  | 0,551990116 |  |
| 1567105_at   | -               | 0,133056859  | -0,41858459  | 0,551641448 |  |
| 208257_x_at  | PSG1            | 0,133056859  | -0,41858459  | 0,551641448 |  |
| 218744_s_at  | PACSIN3         | 0,133056859  | -0,41858459  | 0,551641448 |  |
| 1559883_s_at | SAMHD1          | 0,928678725  | 0,377530647  | 0,551148078 |  |
| 204953_at    | SNAP91          | 0,228146222  | -0,322870281 | 0,551016503 |  |
| 239948_at    | NUP153          | 0,228146222  | -0,322870281 | 0,551016503 |  |
| 1555948_s_at | FAM120A         | 2,693452197  | 2,14244844   | 0,551003758 |  |
| 209571_at    | CIR1            | 1,119359127  | 0,568365095  | 0,550994032 |  |
| 222472_at    | AFTPH           | 2,562727117  | 2,011838132  | 0,550888985 |  |
| 60474_at     | FERMT1          | -1,511180288 | -2,062056522 | 0,550876233 |  |
| 236485_at    | LOC100507111    | 2,236584753  | 1,685812099  | 0,550772653 |  |
| 218102_at    | DERA            | 0,984222186  | 0,433557298  | 0,550664887 |  |
| 200849_s_at  | AHCYL1          | 3,439206878  | 2,888726553  | 0,550480325 |  |
| 35846_at     | THRA            | 0,260000594  | -0,289989561 | 0,549990155 |  |
| 213917_at    | PAX8            | 0,20027154   | -0,34958478  | 0,54985632  |  |
| 203668_at    | MAN2C1          | 0,291166226  | -0,258114234 | 0,54928046  |  |
| 215654_at    | BCAT2           | 0,291166226  | -0,258114234 | 0,54928046  |  |
| 235585_at    | -               | 0,798390451  | 0,249604176  | 0,548786275 |  |
| 234347_s_at  | DENR            | 0,555999837  | 0,007421914  | 0,548577923 |  |
| 225962_at    | ZNRF1           | 0,859074518  | 0,310717132  | 0,548357386 |  |
| 1556925_at   | SMC3            | -2,187914861 | -2,735862426 | 0,547947565 |  |
| 1556963_at   | -               | -2,187914861 | -2,735862426 | 0,547947565 |  |
| 1561849_at   | PKD1L2          | -2,187914861 | -2,735862426 | 0,547947565 |  |
| 1563132_at   | -               | -2,187914861 | -2,735862426 | 0,547947565 |  |
| 1569240_at   | ZNF93           | -2,187914861 | -2,735862426 | 0,547947565 |  |
| 206011_at    | CASP1           | -2,187914861 | -2,735862426 | 0,547947565 |  |
| 216067_at    | -               | -2,187914861 | -2,735862426 | 0,547947565 |  |
| 225790_at    | MSRB3           | -2,187914861 | -2,735862426 | 0,547947565 |  |
| 233251_at    | STRBP           | -2,187914861 | -2,735862426 | 0,547947565 |  |
| 242166_at    | -               | -2,187914861 | -2,735862426 | 0,547947565 |  |
| 243949_at    | -               | -2,187914861 | -2,735862426 | 0,547947565 |  |
| 218040_at    | PRPF38B         | 3,28739962   | 2,739547836  | 0,547851784 |  |
| 1560896_a_at | -               | -0,946847173 | -1,494668682 | 0,547821509 |  |
| 1561181_at   | -               | -0,946847173 | -1,494668682 | 0,547821509 |  |
| 205114_s_at  | CCL3 /// CCL3L1 | -0,946847173 | -1,494668682 | 0,547821509 |  |
| 207819_s_at  | ABCB4           | -0,946847173 | -1,494668682 | 0,547821509 |  |
| 210748_at    | -               | -0,946847173 | -1,494668682 | 0,547821509 |  |
| 216654_at    | TNXB            | -0,946847173 | -1,494668682 | 0,547821509 |  |

|              |           |              |              |             |  |
|--------------|-----------|--------------|--------------|-------------|--|
| 223609_at    | ROPN1L    | -0,946847173 | -1,494668682 | 0,547821509 |  |
| 236887_at    | KIN       | -0,946847173 | -1,494668682 | 0,547821509 |  |
| 238186_at    | -         | -0,946847173 | -1,494668682 | 0,547821509 |  |
| 221778_at    | JHDM1D    | 0,351548291  | -0,19610998  | 0,547658271 |  |
| 219694_at    | FAM105A   | 0,841135803  | 0,293518836  | 0,547616967 |  |
| 202987_at    | TRAF3IP2  | -2,551294263 | -3,098858316 | 0,547564053 |  |
| 217206_at    | -         | -2,551294263 | -3,098858316 | 0,547564053 |  |
| 221127_s_at  | DKK3      | -2,551294263 | -3,098858316 | 0,547564053 |  |
| 230559_x_at  | FGD4      | -2,551294263 | -3,098858316 | 0,547564053 |  |
| 233377_at    | -         | -2,551294263 | -3,098858316 | 0,547564053 |  |
| 237778_at    | -         | -2,551294263 | -3,098858316 | 0,547564053 |  |
| 240322_at    | -         | -2,551294263 | -3,098858316 | 0,547564053 |  |
| 205006_s_at  | NMT2      | 1,841816345  | 1,294497133  | 0,547319212 |  |
| 216962_at    | RPAIN     | 1,841816345  | 1,294497133  | 0,547319212 |  |
| 1558438_a_at | IGHA1     | -0,67289328  | -1,220210588 | 0,547317308 |  |
| 1570297_at   | -         | -0,67289328  | -1,220210588 | 0,547317308 |  |
| 205199_at    | CA9       | -0,67289328  | -1,220210588 | 0,547317308 |  |
| 216072_at    | -         | -0,67289328  | -1,220210588 | 0,547317308 |  |
| 229159_at    | THSD7A    | -0,67289328  | -1,220210588 | 0,547317308 |  |
| 214765_s_at  | NAAA      | 0,606430281  | 0,059218869  | 0,547211413 |  |
| 1569443_s_at | -         | -1,240169874 | -1,787089803 | 0,546919929 |  |
| 209570_s_at  | D4S234E   | -1,240169874 | -1,787089803 | 0,546919929 |  |
| 215400_x_at  | ADCY9     | -1,240169874 | -1,787089803 | 0,546919929 |  |
| 216857_at    | IL23A     | -1,240169874 | -1,787089803 | 0,546919929 |  |
| 217058_at    | GNAS      | -1,240169874 | -1,787089803 | 0,546919929 |  |
| 218813_s_at  | SH3GLB2   | -1,240169874 | -1,787089803 | 0,546919929 |  |
| 221317_x_at  | PCDHB6    | -1,240169874 | -1,787089803 | 0,546919929 |  |
| 221980_at    | EMILIN2   | -1,240169874 | -1,787089803 | 0,546919929 |  |
| 224550_s_at  | MRVI1     | -1,240169874 | -1,787089803 | 0,546919929 |  |
| 226950_at    | ACVRL1    | -1,240169874 | -1,787089803 | 0,546919929 |  |
| 233515_at    | -         | -1,240169874 | -1,787089803 | 0,546919929 |  |
| 227595_at    | ZMYM6     | 1,283332461  | 0,73688026   | 0,5464522   |  |
| 226468_at    | RNF115    | 1,883312263  | 1,337086025  | 0,546226238 |  |
| 222538_s_at  | APPL1     | 1,314003737  | 0,768343791  | 0,545659946 |  |
| 214081_at    | PLXDC1    | -0,366776884 | -0,912331589 | 0,545554705 |  |
| 220777_at    | KIF13A    | -0,366776884 | -0,912331589 | 0,545554705 |  |
| 223496_s_at  | CCDC8     | -0,366776884 | -0,912331589 | 0,545554705 |  |
| 233654_at    | PIGG      | -0,366776884 | -0,912331589 | 0,545554705 |  |
| 239403_at    | CCDC120   | -0,366776884 | -0,912331589 | 0,545554705 |  |
| 1563489_at   | LOC285638 | -0,83191556  | -1,377419394 | 0,545503834 |  |
| 205637_s_at  | SH3GL3    | -0,83191556  | -1,377419394 | 0,545503834 |  |
| 207586_at    | SHH       | -0,83191556  | -1,377419394 | 0,545503834 |  |
| 211608_at    | -         | -0,83191556  | -1,377419394 | 0,545503834 |  |
| 230693_at    | ATP2A1    | -0,83191556  | -1,377419394 | 0,545503834 |  |
| 237103_at    | -         | -0,83191556  | -1,377419394 | 0,545503834 |  |
| 242103_at    | TMEM86A   | -0,83191556  | -1,377419394 | 0,545503834 |  |
| 1556794_at   | -         | 0,384950573  | -0,160136748 | 0,545087322 |  |
| 1565576_at   | -         | 0,702292136  | 0,157549243  | 0,544742893 |  |
| 235902_at    | -         | 0,702292136  | 0,157549243  | 0,544742893 |  |
| 1564190_x_at | ZNF519    | 0,083054335  | -0,461594427 | 0,544648761 |  |
| 208536_s_at  | BCL2L11   | 0,083054335  | -0,461594427 | 0,544648761 |  |
| 1554735_a_at | TRIM7     | -0,022466681 | -0,566887459 | 0,544420779 |  |
| 233287_at    | SLC6A17   | 1,735773781  | 1,191491281  | 0,5442825   |  |
| 202083_s_at  | SEC14L1   | 1,62481334   | 1,080561626  | 0,544251714 |  |
| 205745_x_at  | ADAM17    | 1,767779954  | 1,223626587  | 0,544153366 |  |
| 228619_x_at  | TIPRL     | 1,954567604  | 1,410714371  | 0,543853232 |  |

|              |                |              |              |             |  |
|--------------|----------------|--------------|--------------|-------------|--|
| 202877_s_at  | CD93           | -0,221656139 | -0,765504029 | 0,54384789  |  |
| 206270_at    | PRKCG          | -0,221656139 | -0,765504029 | 0,54384789  |  |
| 218174_s_at  | C10orf57       | -0,221656139 | -0,765504029 | 0,54384789  |  |
| 225241_at    | CCDC80         | -0,221656139 | -0,765504029 | 0,54384789  |  |
| 228304_at    | RBM43          | -0,221656139 | -0,765504029 | 0,54384789  |  |
| 231014_at    | TRIM50         | -0,221656139 | -0,765504029 | 0,54384789  |  |
| 234724_x_at  | PCDHB18        | -0,221656139 | -0,765504029 | 0,54384789  |  |
| 240464_at    | -              | -0,221656139 | -0,765504029 | 0,54384789  |  |
| 225303_at    | KIRREL         | 0,44160593   | -0,102100538 | 0,543706467 |  |
| 1558621_at   | CABLES1        | -1,543331864 | -2,086984744 | 0,543652879 |  |
| 1559321_at   | -              | -1,543331864 | -2,086984744 | 0,543652879 |  |
| 1560334_at   | MEGF11         | -1,543331864 | -2,086984744 | 0,543652879 |  |
| 1565674_at   | FCGR2A /// FCG | -1,543331864 | -2,086984744 | 0,543652879 |  |
| 1569090_x_at | FLJ35390       | -1,543331864 | -2,086984744 | 0,543652879 |  |
| 1570177_at   | -              | -1,543331864 | -2,086984744 | 0,543652879 |  |
| 206295_at    | IL18           | -1,543331864 | -2,086984744 | 0,543652879 |  |
| 207361_at    | HBP1           | -1,543331864 | -2,086984744 | 0,543652879 |  |
| 216749_at    | -              | -1,543331864 | -2,086984744 | 0,543652879 |  |
| 217072_at    | CD300A         | -1,543331864 | -2,086984744 | 0,543652879 |  |
| 220111_s_at  | ANO2           | -1,543331864 | -2,086984744 | 0,543652879 |  |
| 221107_at    | CHRNA9         | -1,543331864 | -2,086984744 | 0,543652879 |  |
| 222910_s_at  | PEX5L          | -1,543331864 | -2,086984744 | 0,543652879 |  |
| 230193_at    | WDR66          | -1,543331864 | -2,086984744 | 0,543652879 |  |
| 234454_at    | -              | -1,543331864 | -2,086984744 | 0,543652879 |  |
| 236743_at    | AGPAT6         | -1,543331864 | -2,086984744 | 0,543652879 |  |
| 238603_at    | LOC254559      | -1,543331864 | -2,086984744 | 0,543652879 |  |
| 239831_at    | TMEM106C       | -1,543331864 | -2,086984744 | 0,543652879 |  |
| 228188_at    | FOSL2          | 0,747935635  | 0,204310755  | 0,54362488  |  |
| 1562675_at   | C1orf86        | 1,360921491  | 0,817300337  | 0,543621154 |  |
| 1569307_s_at | -              | -2,236765673 | -2,780313924 | 0,543548252 |  |
| 208075_s_at  | CCL7           | -2,236765673 | -2,780313924 | 0,543548252 |  |
| 217083_at    | -              | -2,236765673 | -2,780313924 | 0,543548252 |  |
| 225491_at    | SLC1A2         | -2,236765673 | -2,780313924 | 0,543548252 |  |
| 227643_at    | TPPP           | -2,236765673 | -2,780313924 | 0,543548252 |  |
| 228792_at    | -              | -2,236765673 | -2,780313924 | 0,543548252 |  |
| 237790_at    | SCN8A          | -2,236765673 | -2,780313924 | 0,543548252 |  |
| 237946_at    | -              | -2,236765673 | -2,780313924 | 0,543548252 |  |
| 242686_at    | STARD13        | -2,236765673 | -2,780313924 | 0,543548252 |  |
| 1559007_s_at | -              | -0,136301282 | -0,679763839 | 0,543462557 |  |
| 208188_at    | KRT9           | -0,136301282 | -0,679763839 | 0,543462557 |  |
| 221287_at    | RNASEL         | -0,136301282 | -0,679763839 | 0,543462557 |  |
| 232185_at    | C20orf132      | -0,136301282 | -0,679763839 | 0,543462557 |  |
| 238452_at    | FCRLB          | 0,810733188  | 0,26733076   | 0,543402428 |  |
| 219460_s_at  | TMEM127        | 1,880387527  | 1,337086025  | 0,543301502 |  |
| 213209_at    | TAF6L          | 0,052199481  | -0,490927335 | 0,543126816 |  |
| 230256_at    | RUSC1-AS1      | 0,052199481  | -0,490927335 | 0,543126816 |  |
| 239850_at    | -              | 0,052199481  | -0,490927335 | 0,543126816 |  |
| 1566129_at   | LIMS1          | -0,467091869 | -1,010192375 | 0,543100506 |  |
| 214746_s_at  | ZNF467         | -0,467091869 | -1,010192375 | 0,543100506 |  |
| 228577_x_at  | ODF2L          | -0,467091869 | -1,010192375 | 0,543100506 |  |
| 230452_at    | FLJ42351       | -0,467091869 | -1,010192375 | 0,543100506 |  |
| 211038_s_at  | CROCCP2        | 3,420201053  | 2,877228323  | 0,54297273  |  |
| 228423_at    | MAP9           | 1,201332287  | 0,658444279  | 0,542888008 |  |
| 235282_at    | LOC100506295   | 1,201332287  | 0,658444279  | 0,542888008 |  |
| 235330_at    | CCDC117        | 0,496120222  | -0,046302147 | 0,542422369 |  |
| 227179_at    | STAU2          | 2,292660284  | 1,750261389  | 0,542398895 |  |

|              |                 |              |              |             |  |
|--------------|-----------------|--------------|--------------|-------------|--|
| 215446_s_at  | LOX             | 1,073999308  | 0,532164371  | 0,541834937 |  |
| 233503_at    | CCDC169         | 0,123193849  | -0,41858459  | 0,541778439 |  |
| 224994_at    | CAMK2D          | 1,406361373  | 0,864649967  | 0,541711406 |  |
| 1559745_at   | -               | -1,196375121 | -1,738067356 | 0,541692234 |  |
| 204607_at    | HMGCS2          | -1,196375121 | -1,738067356 | 0,541692234 |  |
| 205949_at    | CA1             | -1,196375121 | -1,738067356 | 0,541692234 |  |
| 209266_s_at  | SLC39A8         | -1,196375121 | -1,738067356 | 0,541692234 |  |
| 231908_at    | ZDHHC18         | -1,196375121 | -1,738067356 | 0,541692234 |  |
| 244439_at    | SPRED1          | -1,196375121 | -1,738067356 | 0,541692234 |  |
| 222294_s_at  | RAB27A          | 1,960118853  | 1,418668082  | 0,541450771 |  |
| 208245_at    | RAB9BP1         | -2,597496523 | -3,138626879 | 0,541130356 |  |
| 211592_s_at  | CACNA1C         | -2,597496523 | -3,138626879 | 0,541130356 |  |
| 215475_at    | -               | -2,597496523 | -3,138626879 | 0,541130356 |  |
| 244230_at    | -               | -2,597496523 | -3,138626879 | 0,541130356 |  |
| 209829_at    | FAM65B          | 1,434549838  | 0,893473268  | 0,54107657  |  |
| 220643_s_at  | FAIM            | 2,206540699  | 1,665902186  | 0,540638514 |  |
| 235354_s_at  | RSRC1           | 0,934330293  | 0,393761504  | 0,540568788 |  |
| 37145_at     | GNLY            | -1,251195656 | -1,791342178 | 0,540146522 |  |
| 219149_x_at  | DBR1            | 2,72965419   | 2,189694216  | 0,539959974 |  |
| 1557661_at   | -               | -1,964176657 | -2,503677622 | 0,539500966 |  |
| 1559174_at   | RAB6A           | -1,964176657 | -2,503677622 | 0,539500966 |  |
| 1565705_x_at | -               | -1,964176657 | -2,503677622 | 0,539500966 |  |
| 1569439_at   | -               | -1,964176657 | -2,503677622 | 0,539500966 |  |
| 206354_at    | SLCO1B3         | -1,964176657 | -2,503677622 | 0,539500966 |  |
| 211523_at    | GNRHR           | -1,964176657 | -2,503677622 | 0,539500966 |  |
| 214899_at    | ZNF780B         | -1,964176657 | -2,503677622 | 0,539500966 |  |
| 216123_x_at  | -               | -1,964176657 | -2,503677622 | 0,539500966 |  |
| 216260_at    | DICER1          | -1,964176657 | -2,503677622 | 0,539500966 |  |
| 233916_at    | NYAP2           | -1,964176657 | -2,503677622 | 0,539500966 |  |
| 234279_at    | -               | -1,964176657 | -2,503677622 | 0,539500966 |  |
| 239889_at    | SERP2           | -1,964176657 | -2,503677622 | 0,539500966 |  |
| 241313_at    | DOCK4           | -1,964176657 | -2,503677622 | 0,539500966 |  |
| 244557_at    | C11orf55        | -1,964176657 | -2,503677622 | 0,539500966 |  |
| 212431_at    | HMGXB3          | 3,130084275  | 2,590852465  | 0,53923181  |  |
| 206709_x_at  | GPT             | 0,255492549  | -0,283667828 | 0,539160377 |  |
| 212700_x_at  | PLEKHM1 /// PLE | 0,255492549  | -0,283667828 | 0,539160377 |  |
| 221180_at    | YSK4            | 0,255492549  | -0,283667828 | 0,539160377 |  |
| 205341_at    | EHD2            | 0,715481152  | 0,176436073  | 0,539045078 |  |
| 210752_s_at  | MLX             | 0,715481152  | 0,176436073  | 0,539045078 |  |
| 222151_s_at  | CEP63           | 0,715481152  | 0,176436073  | 0,539045078 |  |
| 219147_s_at  | NMRK1           | 0,95671774   | 0,417770464  | 0,538947277 |  |
| 205600_x_at  | HOXB5           | -0,57445847  | -1,112851844 | 0,538393374 |  |
| 230793_at    | LRRC16A         | -0,57445847  | -1,112851844 | 0,538393374 |  |
| 236785_at    | LOC100507390    | -0,57445847  | -1,112851844 | 0,538393374 |  |
| 243552_at    | MBTD1           | -0,57445847  | -1,112851844 | 0,538393374 |  |
| 243853_at    | -               | -0,57445847  | -1,112851844 | 0,538393374 |  |
| 1552976_at   | -               | -0,512251684 | -1,050406615 | 0,538154931 |  |
| 1562482_at   | -               | -0,512251684 | -1,050406615 | 0,538154931 |  |
| 213433_at    | ARL3            | -0,512251684 | -1,050406615 | 0,538154931 |  |
| 217690_at    | ENOSF1          | -0,512251684 | -1,050406615 | 0,538154931 |  |
| 235737_at    | TSLP            | -0,512251684 | -1,050406615 | 0,538154931 |  |
| 235772_at    | -               | -0,512251684 | -1,050406615 | 0,538154931 |  |
| 236167_at    | -               | -0,512251684 | -1,050406615 | 0,538154931 |  |
| 212651_at    | RHOBTB1         | 0,760715727  | 0,222599095  | 0,538116632 |  |
| 229499_at    | CAPN13          | 0,695652136  | 0,157549243  | 0,538102893 |  |
| 239364_at    | -               | 0,695652136  | 0,157549243  | 0,538102893 |  |

|              |                |              |              |             |  |
|--------------|----------------|--------------|--------------|-------------|--|
| 207100_s_at  | VAMP1          | 0,401366113  | -0,136643983 | 0,538010096 |  |
| 1559064_at   | NUP153         | 1,442503549  | 0,904843258  | 0,53766029  |  |
| 214205_x_at  | GLRX3          | 3,325531666  | 2,787940144  | 0,537591521 |  |
| 1555264_a_at | LINC00598      | -1,424023738 | -1,961547147 | 0,537523409 |  |
| 1561967_at   | FLNB-AS1       | -1,424023738 | -1,961547147 | 0,537523409 |  |
| 206779_s_at  | ASMT           | -1,424023738 | -1,961547147 | 0,537523409 |  |
| 208247_at    | ERC2-IT1       | -1,424023738 | -1,961547147 | 0,537523409 |  |
| 208552_at    | GRIK4          | -1,424023738 | -1,961547147 | 0,537523409 |  |
| 217069_at    | MLL4           | -1,424023738 | -1,961547147 | 0,537523409 |  |
| 232412_at    | FBXL20         | -1,424023738 | -1,961547147 | 0,537523409 |  |
| 1554940_a_at | LOC388882      | -0,79540287  | -1,332017329 | 0,536614459 |  |
| 202285_s_at  | TACSTD2        | -0,79540287  | -1,332017329 | 0,536614459 |  |
| 208272_at    | RANBP3         | -0,79540287  | -1,332017329 | 0,536614459 |  |
| 209807_s_at  | NFIX           | -0,79540287  | -1,332017329 | 0,536614459 |  |
| 213781_at    | PPP1R37        | -0,79540287  | -1,332017329 | 0,536614459 |  |
| 230458_at    | SLC45A1        | -0,79540287  | -1,332017329 | 0,536614459 |  |
| 242729_at    | LOC100506866   | -0,79540287  | -1,332017329 | 0,536614459 |  |
| 204399_s_at  | EML2           | -0,078265071 | -0,614371577 | 0,536106505 |  |
| 235051_at    | CCDC50         | -0,078265071 | -0,614371577 | 0,536106505 |  |
| 233441_at    | ONECUT2        | -2,866296344 | -3,402185466 | 0,535889122 |  |
| 1555122_at   | GPR125         | -2,311268652 | -2,847001814 | 0,535733163 |  |
| 202936_s_at  | SOX9           | -2,311268652 | -2,847001814 | 0,535733163 |  |
| 211567_at    | -              | -2,311268652 | -2,847001814 | 0,535733163 |  |
| 216468_s_at  | ZNF682         | -2,311268652 | -2,847001814 | 0,535733163 |  |
| 220132_s_at  | CLEC2D         | -2,311268652 | -2,847001814 | 0,535733163 |  |
| 234094_x_at  | DNAJC21        | -2,311268652 | -2,847001814 | 0,535733163 |  |
| 239092_at    | ITGA8          | -2,311268652 | -2,847001814 | 0,535733163 |  |
| 239486_at    | -              | -2,311268652 | -2,847001814 | 0,535733163 |  |
| 239722_at    | C5orf49        | -2,311268652 | -2,847001814 | 0,535733163 |  |
| 241217_x_at  | -              | -2,311268652 | -2,847001814 | 0,535733163 |  |
| 242764_at    | DCHS2          | -2,311268652 | -2,847001814 | 0,535733163 |  |
| 242792_at    | -              | -2,311268652 | -2,847001814 | 0,535733163 |  |
| 1555370_a_at | CAMTA1         | 0,888485433  | 0,352836757  | 0,535648676 |  |
| 1560588_at   | -              | -0,00073712  | -0,536087151 | 0,535350031 |  |
| 1555788_a_at | TRIB3          | 1,089278259  | 0,553993624  | 0,535284635 |  |
| 1553585_a_at | MAGEA10-MAGE   | -0,888496123 | -1,423348341 | 0,534852219 |  |
| 1559576_at   | WDR78          | -0,888496123 | -1,423348341 | 0,534852219 |  |
| 1561155_at   | -              | -0,888496123 | -1,423348341 | 0,534852219 |  |
| 207764_s_at  | HIPK3          | -0,888496123 | -1,423348341 | 0,534852219 |  |
| 215560_x_at  | MTRF1L         | -0,888496123 | -1,423348341 | 0,534852219 |  |
| 230561_s_at  | KANSL1L        | -0,888496123 | -1,423348341 | 0,534852219 |  |
| 240902_at    | LOC283624      | -0,888496123 | -1,423348341 | 0,534852219 |  |
| 219805_at    | CXorf56        | 0,87091093   | 0,336136178  | 0,534774752 |  |
| 1557139_at   | DDX11-AS1      | -2,64318869  | -3,177802286 | 0,534613596 |  |
| 1564767_at   | -              | -2,64318869  | -3,177802286 | 0,534613596 |  |
| 216844_at    | ZC3H7B         | -2,64318869  | -3,177802286 | 0,534613596 |  |
| 225207_at    | PDK4           | 0,072842263  | -0,461594427 | 0,534436689 |  |
| 238885_at    | KIAA1549       | 0,072842263  | -0,461594427 | 0,534436689 |  |
| 243957_at    | LOC100128108   | 0,072842263  | -0,461594427 | 0,534436689 |  |
| 219810_at    | VCPIP1         | 0,613492853  | 0,079428135  | 0,534064718 |  |
| 227195_at    | ZNF503         | 0,613492853  | 0,079428135  | 0,534064718 |  |
| 239598_s_at  | LPCAT2         | 0,613492853  | 0,079428135  | 0,534064718 |  |
| 234984_at    | NEDD1          | 2,972842302  | 2,438805127  | 0,534037175 |  |
| 1559909_a_at | TIMM17B        | -0,196756757 | -0,730778808 | 0,534022051 |  |
| 218851_s_at  | SFT2D3 /// WDR | -0,196756757 | -0,730778808 | 0,534022051 |  |
| 224001_at    | FAM135B        | -0,196756757 | -0,730778808 | 0,534022051 |  |

|             |                 |              |              |             |  |
|-------------|-----------------|--------------|--------------|-------------|--|
| 225542_at   | ACAP3           | -0,196756757 | -0,730778808 | 0,534022051 |  |
| 232516_x_at | DAP3            | -0,196756757 | -0,730778808 | 0,534022051 |  |
| 233148_at   | PODN            | -0,196756757 | -0,730778808 | 0,534022051 |  |
| 235880_at   | SRRM3           | -0,196756757 | -0,730778808 | 0,534022051 |  |
| 205680_at   | MMP10           | -0,112808516 | -0,646746079 | 0,533937562 |  |
| 211738_x_at | CELA3A          | -0,112808516 | -0,646746079 | 0,533937562 |  |
| 234481_at   | -               | -0,112808516 | -0,646746079 | 0,533937562 |  |
| 239266_at   | -               | -0,112808516 | -0,646746079 | 0,533937562 |  |
| 244474_at   | -               | 0,541261317  | 0,007421914  | 0,533839403 |  |
| 213020_at   | GOSR1           | 2,26825514   | 1,73441697   | 0,53383817  |  |
| 213530_at   | RAB3GAP1        | 2,26825514   | 1,73441697   | 0,53383817  |  |
| 235903_at   | ANKS6           | 1,191926657  | 0,658444279  | 0,533482378 |  |
| 229087_s_at | -               | -0,033456564 | -0,566887459 | 0,533430895 |  |
| 235237_at   | VMA21           | -0,033456564 | -0,566887459 | 0,533430895 |  |
| 239020_at   | FUT10           | -0,033456564 | -0,566887459 | 0,533430895 |  |
| 239645_at   | -               | -0,033456564 | -0,566887459 | 0,533430895 |  |
| 221454_at   | -               | -0,285837228 | -0,819238336 | 0,533401108 |  |
| 242167_at   | -               | -0,285837228 | -0,819238336 | 0,533401108 |  |
| 204426_at   | TMED2           | 3,927675977  | 3,394350331  | 0,533325646 |  |
| 231918_s_at | GFM2            | 2,965960999  | 2,432926755  | 0,533034245 |  |
| 241344_at   | -               | 1,923647937  | 1,390636111  | 0,533011826 |  |
| 204204_at   | SLC31A2         | 0,592200562  | 0,059218869  | 0,532981693 |  |
| 206726_at   | HPGDS           | 0,592200562  | 0,059218869  | 0,532981693 |  |
| 227298_at   | FLJ37798        | 0,592200562  | 0,059218869  | 0,532981693 |  |
| 1562286_at  | -               | -2,504600601 | -3,037500868 | 0,532900267 |  |
| 207744_at   | -               | -2,504600601 | -3,037500868 | 0,532900267 |  |
| 215468_at   | LOC647070       | -2,504600601 | -3,037500868 | 0,532900267 |  |
| 242274_x_at | SLC25A42        | -2,504600601 | -3,037500868 | 0,532900267 |  |
| 242909_at   | -               | -2,504600601 | -3,037500868 | 0,532900267 |  |
| 212612_at   | RCOR1           | 4,823882603  | 4,291026333  | 0,53285627  |  |
| 225086_at   | FAM98B          | 4,449221925  | 3,916534328  | 0,532687596 |  |
| 211180_x_at | LOC100506403 /  | 0,209623097  | -0,322870281 | 0,532493378 |  |
| 212730_at   | SYNM            | 0,209623097  | -0,322870281 | 0,532493378 |  |
| 1557141_at  | FAM188B /// INM | -1,131062212 | -1,663414495 | 0,532352282 |  |
| 206775_at   | CUBN            | -1,131062212 | -1,663414495 | 0,532352282 |  |
| 207200_at   | OTC             | -1,131062212 | -1,663414495 | 0,532352282 |  |
| 207964_x_at | IFNA4           | -1,131062212 | -1,663414495 | 0,532352282 |  |
| 209779_at   | LLPH            | -1,131062212 | -1,663414495 | 0,532352282 |  |
| 213284_at   | ZFP36L1         | -1,131062212 | -1,663414495 | 0,532352282 |  |
| 220572_at   | LOC100506282    | -1,131062212 | -1,663414495 | 0,532352282 |  |
| 227276_at   | PLXDC2          | -1,131062212 | -1,663414495 | 0,532352282 |  |
| 227556_at   | NME7            | -1,131062212 | -1,663414495 | 0,532352282 |  |
| 230719_at   | ING3            | -1,131062212 | -1,663414495 | 0,532352282 |  |
| 231218_at   | -               | -1,131062212 | -1,663414495 | 0,532352282 |  |
| 232846_s_at | CDH23 /// LOC10 | -1,131062212 | -1,663414495 | 0,532352282 |  |
| 232871_at   | -               | -1,131062212 | -1,663414495 | 0,532352282 |  |
| 235246_at   | -               | -1,131062212 | -1,663414495 | 0,532352282 |  |
| 238255_at   | -               | -1,131062212 | -1,663414495 | 0,532352282 |  |
| 239610_at   | -               | -1,131062212 | -1,663414495 | 0,532352282 |  |
| 240618_at   | -               | -1,131062212 | -1,663414495 | 0,532352282 |  |
| 242243_at   | TMF1            | -1,131062212 | -1,663414495 | 0,532352282 |  |
| 210665_at   | TFPI            | 0,641402394  | 0,109221392  | 0,532181002 |  |
| 236296_x_at | C8orf58         | 0,641402394  | 0,109221392  | 0,532181002 |  |
| 218326_s_at | LGR4            | 2,352981171  | 1,820984782  | 0,531996389 |  |
| 206644_at   | NR0B1           | -0,622910612 | -1,154897679 | 0,531987066 |  |
| 214188_at   | -               | -0,622910612 | -1,154897679 | 0,531987066 |  |

|              |                |              |              |             |  |
|--------------|----------------|--------------|--------------|-------------|--|
| 1558666_at   | PHEX-AS1       | -2,089474779 | -2,621331989 | 0,53185721  |  |
| 1562537_at   | FCER1A         | -2,089474779 | -2,621331989 | 0,53185721  |  |
| 1566491_at   | -              | -2,089474779 | -2,621331989 | 0,53185721  |  |
| 213745_at    | ATRN1          | -2,089474779 | -2,621331989 | 0,53185721  |  |
| 217057_s_at  | GNAS           | -2,089474779 | -2,621331989 | 0,53185721  |  |
| 225072_at    | ZCCHC3         | -2,089474779 | -2,621331989 | 0,53185721  |  |
| 243086_at    | -              | -2,089474779 | -2,621331989 | 0,53185721  |  |
| 202837_at    | TRAFFD1        | 2,16388051   | 1,632095957  | 0,531784553 |  |
| 1554706_at   | OR2L13         | -2,779459409 | -3,311072652 | 0,531613243 |  |
| 1556354_s_at | RGL3           | -2,779459409 | -3,311072652 | 0,531613243 |  |
| 207308_at    | SLCO1A2        | -2,779459409 | -3,311072652 | 0,531613243 |  |
| 207537_at    | PFKFB1         | -0,148196756 | -0,679763839 | 0,531567083 |  |
| 208325_s_at  | AKAP13         | -0,148196756 | -0,679763839 | 0,531567083 |  |
| 214380_at    | PRPF31         | -0,148196756 | -0,679763839 | 0,531567083 |  |
| 231151_at    | DLGAP3         | 0,273439642  | -0,258114234 | 0,531553876 |  |
| 225244_at    | LOC100130093 / | 3,420201053  | 2,888726553  | 0,5314745   |  |
| 216554_s_at  | ENO1           | 3,262904562  | 2,731588328  | 0,531316234 |  |
| 205122_at    | MSANTD3-TMEF   | 2,259277178  | 1,728030156  | 0,531247021 |  |
| 211237_s_at  | FGFR4          | -0,234278768 | -0,765504029 | 0,531225261 |  |
| 214330_at    | ATPAF2         | -0,234278768 | -0,765504029 | 0,531225261 |  |
| 1555645_at   | GAFA2          | 0,181384709  | -0,34958478  | 0,53096949  |  |
| 235914_at    | SYNPO          | 0,181384709  | -0,34958478  | 0,53096949  |  |
| 242307_at    | ZNF789         | 0,735041319  | 0,204310755  | 0,530730564 |  |
| 1562236_at   | KAT6B          | -2,359436556 | -2,89013181  | 0,530695254 |  |
| 222124_at    | HIF3A          | -2,359436556 | -2,89013181  | 0,530695254 |  |
| 243767_at    | -              | -2,359436556 | -2,89013181  | 0,530695254 |  |
| 231837_at    | USP28          | 1,406361373  | 0,876248481  | 0,530112892 |  |
| 201249_at    | SLC2A1         | 0,246434561  | -0,283667828 | 0,530102388 |  |
| 235515_at    | SYNE4          | 0,246434561  | -0,283667828 | 0,530102388 |  |
| 202879_s_at  | CYTH1          | 0,779676066  | 0,249604176  | 0,53007189  |  |
| 232371_at    | 07.03.15       | -0,325749314 | -0,855751026 | 0,530001712 |  |
| 233891_at    | MUC3           | -0,325749314 | -0,855751026 | 0,530001712 |  |
| 209606_at    | CYTIP          | 0,882651021  | 0,352836757  | 0,529814264 |  |
| 235566_at    | TMF1           | 0,882651021  | 0,352836757  | 0,529814264 |  |
| 235280_at    | POLR1A         | 1,119359127  | 0,589657387  | 0,52970174  |  |
| 224132_at    | -              | 0,822971223  | 0,293518836  | 0,529452388 |  |
| 1553114_a_at | PTK6           | 0,30867765   | -0,220592223 | 0,529269873 |  |
| 229660_at    | C16orf55       | 0,30867765   | -0,220592223 | 0,529269873 |  |
| 202131_s_at  | RIOK3          | 2,967339888  | 2,438805127  | 0,528534762 |  |
| 201486_at    | RCN2           | 4,182805865  | 3,654731437  | 0,528074428 |  |
| 1552788_a_at | HELB           | -0,423248115 | -0,950686014 | 0,527437899 |  |
| 1557263_s_at | -              | -0,423248115 | -0,950686014 | 0,527437899 |  |
| 215455_at    | TIMELESS       | -0,423248115 | -0,950686014 | 0,527437899 |  |
| 244305_at    | GGN            | -0,423248115 | -0,950686014 | 0,527437899 |  |
| 228842_at    | -              | 0,984222186  | 0,456918297  | 0,527303888 |  |
| 209151_x_at  | TCF3           | 0,480753764  | -0,046302147 | 0,52705591  |  |
| 229037_at    | TRIM69         | 0,480753764  | -0,046302147 | 0,52705591  |  |
| 210233_at    | IL1RAP         | -0,85085127  | -1,377419394 | 0,526568124 |  |
| 214324_at    | GP2            | -0,85085127  | -1,377419394 | 0,526568124 |  |
| 221179_at    | -              | -0,85085127  | -1,377419394 | 0,526568124 |  |
| 222272_x_at  | SCIN           | -0,85085127  | -1,377419394 | 0,526568124 |  |
| 229260_at    | C5orf15        | -0,85085127  | -1,377419394 | 0,526568124 |  |
| 230836_at    | ST8SIA4        | -0,85085127  | -1,377419394 | 0,526568124 |  |
| 231038_s_at  | -              | -0,85085127  | -1,377419394 | 0,526568124 |  |
| 233806_at    | -              | -0,85085127  | -1,377419394 | 0,526568124 |  |
| 238062_at    | GPIHBP1        | -0,85085127  | -1,377419394 | 0,526568124 |  |



|              |              |              |              |             |  |
|--------------|--------------|--------------|--------------|-------------|--|
| 1561085_at   | LOC153910    | -1,089016378 | -1,615132408 | 0,52611603  |  |
| 203184_at    | FBN2         | -1,089016378 | -1,615132408 | 0,52611603  |  |
| 207383_s_at  | RHBDL1       | -1,089016378 | -1,615132408 | 0,52611603  |  |
| 221098_x_at  | UTP14A       | -1,089016378 | -1,615132408 | 0,52611603  |  |
| 224909_s_at  | PREX1        | -1,089016378 | -1,615132408 | 0,52611603  |  |
| 228413_s_at  | SFRP1        | -1,089016378 | -1,615132408 | 0,52611603  |  |
| 229917_at    | AGAP2        | -1,089016378 | -1,615132408 | 0,52611603  |  |
| 239136_at    | LOC728978    | -1,089016378 | -1,615132408 | 0,52611603  |  |
| 239571_at    | -            | -1,089016378 | -1,615132408 | 0,52611603  |  |
| 244467_at    | SHISA8       | -1,089016378 | -1,615132408 | 0,52611603  |  |
| 224111_x_at  | KLF16        | 1,331241794  | 0,805216064  | 0,52602573  |  |
| 1553264_a_at | SYN1         | 0,702292136  | 0,176436073  | 0,525856063 |  |
| 243176_at    | ARL5A        | 1,360921491  | 0,835239052  | 0,525682439 |  |
| 244743_x_at  | ZNF138       | 2,069451339  | 1,543943227  | 0,525508112 |  |
| 204091_at    | PDE6D        | 3,304956562  | 2,780243895  | 0,524712667 |  |
| 228833_s_at  | -            | -0,089689931 | -0,614371577 | 0,524681645 |  |
| 239175_at    | -            | -0,089689931 | -0,614371577 | 0,524681645 |  |
| 1557456_a_at | -            | -2,712026959 | -3,236070201 | 0,524043241 |  |
| 206418_at    | NOX1         | -2,712026959 | -3,236070201 | 0,524043241 |  |
| 237668_at    | LOC100507201 | -2,712026959 | -3,236070201 | 0,524043241 |  |
| 231871_at    | GPR180       | 1,215326747  | 0,691645685  | 0,523681062 |  |
| 240623_at    | -            | 0,133056859  | -0,39061235  | 0,523669209 |  |
| 1554376_s_at | PTPLA        | -1,688127507 | -2,211750327 | 0,523622821 |  |
| 1560274_at   | WTAP         | -1,688127507 | -2,211750327 | 0,523622821 |  |
| 1569824_at   | -            | -1,688127507 | -2,211750327 | 0,523622821 |  |
| 217570_x_at  | -            | -1,688127507 | -2,211750327 | 0,523622821 |  |
| 220403_s_at  | TP53AIP1     | -1,688127507 | -2,211750327 | 0,523622821 |  |
| 203552_at    | MAP4K5       | 2,936695663  | 2,413157372  | 0,523538291 |  |
| 1554262_s_at | KLHL29       | -1,763254337 | -2,286583451 | 0,523329114 |  |
| 1561485_at   | IQCA1        | -1,763254337 | -2,286583451 | 0,523329114 |  |
| 220676_at    | ADAMTS8      | -1,763254337 | -2,286583451 | 0,523329114 |  |
| 222298_at    | -            | -1,763254337 | -2,286583451 | 0,523329114 |  |
| 226427_s_at  | B3GALT6      | -1,763254337 | -2,286583451 | 0,523329114 |  |
| 230094_at    | -            | -1,763254337 | -2,286583451 | 0,523329114 |  |
| 230501_at    | NDUFA10      | -1,763254337 | -2,286583451 | 0,523329114 |  |
| 233269_at    | -            | -1,763254337 | -2,286583451 | 0,523329114 |  |
| 234593_at    | -            | -1,763254337 | -2,286583451 | 0,523329114 |  |
| 239425_at    | DCUN1D5      | -1,763254337 | -2,286583451 | 0,523329114 |  |
| 239553_at    | LOC729420    | -1,763254337 | -2,286583451 | 0,523329114 |  |
| 201766_at    | ELAC2        | 0,20027154   | -0,322870281 | 0,523141821 |  |
| 1561665_at   | -            | -1,639579028 | -2,162639771 | 0,523060743 |  |
| 219954_s_at  | GBA3         | -1,639579028 | -2,162639771 | 0,523060743 |  |
| 228789_at    | MTMR6        | -1,639579028 | -2,162639771 | 0,523060743 |  |
| 229915_at    | FAM26F       | -1,639579028 | -2,162639771 | 0,523060743 |  |
| 232928_at    | -            | -1,639579028 | -2,162639771 | 0,523060743 |  |
| 237572_at    | UGT3A1       | -1,639579028 | -2,162639771 | 0,523060743 |  |
| 240471_at    | -            | -1,639579028 | -2,162639771 | 0,523060743 |  |
| 1553226_at   | LINC00052    | -1,812418401 | -2,335104118 | 0,522685717 |  |
| 1554776_at   | ZFP42        | -1,812418401 | -2,335104118 | 0,522685717 |  |
| 1557404_at   | -            | -1,812418401 | -2,335104118 | 0,522685717 |  |
| 1563822_at   | LOC100131763 | -1,812418401 | -2,335104118 | 0,522685717 |  |
| 1569962_at   | -            | -1,812418401 | -2,335104118 | 0,522685717 |  |
| 206386_at    | SERPINA7     | -1,812418401 | -2,335104118 | 0,522685717 |  |
| 214285_at    | FABP3        | -1,812418401 | -2,335104118 | 0,522685717 |  |
| 222181_at    | CNOT2        | -1,812418401 | -2,335104118 | 0,522685717 |  |
| 226137_at    | ZFHX3        | -1,812418401 | -2,335104118 | 0,522685717 |  |

|              |                  |              |              |             |  |
|--------------|------------------|--------------|--------------|-------------|--|
| 231105_at    | -                | -1,812418401 | -2,335104118 | 0,522685717 |  |
| 231582_at    | CDHR3 /// LOC10  | -1,812418401 | -2,335104118 | 0,522685717 |  |
| 240638_at    | -                | -1,812418401 | -2,335104118 | 0,522685717 |  |
| 224346_at    | -                | 2,396622324  | 1,874012195  | 0,522610129 |  |
| 233543_s_at  | FAM175A          | 0,900083947  | 0,377530647  | 0,522553301 |  |
| 235032_at    | DNAJC21          | 2,458724341  | 1,936283387  | 0,522440954 |  |
| 1556505_at   | LINC00605        | -0,741668563 | -1,264005341 | 0,522336778 |  |
| 1562496_at   | LOC339539        | -0,741668563 | -1,264005341 | 0,522336778 |  |
| 1566477_at   | -                | -0,741668563 | -1,264005341 | 0,522336778 |  |
| 240672_at    | WDR74            | -0,741668563 | -1,264005341 | 0,522336778 |  |
| 243928_s_at  | ABCC4            | -0,741668563 | -1,264005341 | 0,522336778 |  |
| 1556914_at   | -                | -0,59053611  | -1,112851844 | 0,522315734 |  |
| 1562972_at   | LOC503519        | -0,59053611  | -1,112851844 | 0,522315734 |  |
| 217488_x_at  | PMS2P3           | -0,59053611  | -1,112851844 | 0,522315734 |  |
| 220546_at    | MLL              | -0,59053611  | -1,112851844 | 0,522315734 |  |
| 228338_at    | C11orf93         | -0,59053611  | -1,112851844 | 0,522315734 |  |
| 234598_at    | -                | -0,59053611  | -1,112851844 | 0,522315734 |  |
| 235510_at    | USHBP1           | -0,59053611  | -1,112851844 | 0,522315734 |  |
| 238339_x_at  | LRIG1            | -0,59053611  | -1,112851844 | 0,522315734 |  |
| 205607_s_at  | SCYL3            | 1,699726954  | 1,177496821  | 0,522230134 |  |
| 230789_at    | ZNF280B          | 1,369290453  | 0,847075464  | 0,522214989 |  |
| 1559997_x_at | SAMD14           | 0,03125738   | -0,490927335 | 0,522184715 |  |
| 216542_x_at  | IGHA1 /// IGHG1  | 0,03125738   | -0,490927335 | 0,522184715 |  |
| 239754_at    | C17orf76-AS1 /// | 0,03125738   | -0,490927335 | 0,522184715 |  |
| 222243_s_at  | TOB2             | 2,688444421  | 2,166264721  | 0,5221797   |  |
| 1556166_x_at | -                | -2,43257096  | -2,954576755 | 0,522005795 |  |
| 1556916_a_at | -                | -2,43257096  | -2,954576755 | 0,522005795 |  |
| 1559249_at   | ATXN1            | -2,43257096  | -2,954576755 | 0,522005795 |  |
| 1566763_at   | -                | -2,43257096  | -2,954576755 | 0,522005795 |  |
| 1567277_at   | CTTN             | -2,43257096  | -2,954576755 | 0,522005795 |  |
| 1569230_at   | -                | -2,43257096  | -2,954576755 | 0,522005795 |  |
| 205422_s_at  | ITGBL1           | -2,43257096  | -2,954576755 | 0,522005795 |  |
| 214422_at    | RAD23B           | -2,43257096  | -2,954576755 | 0,522005795 |  |
| 220982_s_at  | SPACA1           | -2,43257096  | -2,954576755 | 0,522005795 |  |
| 232896_at    | ERBB2IP          | -2,43257096  | -2,954576755 | 0,522005795 |  |
| 240995_at    | -                | -2,43257096  | -2,954576755 | 0,522005795 |  |
| 1556299_s_at | C12orf76         | 0,103263601  | -0,41858459  | 0,521848191 |  |
| 228777_at    | KBTBD3           | 0,103263601  | -0,41858459  | 0,521848191 |  |
| 233055_at    | -                | 0,103263601  | -0,41858459  | 0,521848191 |  |
| 239856_at    | -                | 0,103263601  | -0,41858459  | 0,521848191 |  |
| 244470_at    | -                | 0,103263601  | -0,41858459  | 0,521848191 |  |
| 204271_s_at  | EDNRB            | 1,426552034  | 0,904843258  | 0,521708776 |  |
| 226167_at    | SYT7             | 0,384950573  | -0,136643983 | 0,521594556 |  |
| 229287_at    | PCNX             | 0,384950573  | -0,136643983 | 0,521594556 |  |
| 242900_at    | ALG10B           | 0,384950573  | -0,136643983 | 0,521594556 |  |
| 206151_x_at  | CELA3B           | 0,171847695  | -0,34958478  | 0,521432476 |  |
| 242217_s_at  | FBRS             | 0,171847695  | -0,34958478  | 0,521432476 |  |
| 227761_at    | MYO5A            | 1,481627361  | 0,960386719  | 0,521240642 |  |
| 236960_at    | -                | 0,44160593   | -0,079522948 | 0,521128878 |  |
| 238604_at    | -                | 0,44160593   | -0,079522948 | 0,521128878 |  |
| 219969_at    | TXLNG            | 1,089278259  | 0,568365095  | 0,520913164 |  |
| 225949_at    | LOC100653301 /   | 0,496120222  | -0,024572586 | 0,520692808 |  |
| 235113_at    | LRR1             | 4,533553167  | 4,012941072  | 0,520612096 |  |
| 1556800_a_at | -                | -1,888254346 | -2,408705138 | 0,520450792 |  |
| 1560895_at   | LOC645188        | -1,888254346 | -2,408705138 | 0,520450792 |  |
| 203697_at    | FRZB             | -1,888254346 | -2,408705138 | 0,520450792 |  |

|              |                |              |              |             |  |
|--------------|----------------|--------------|--------------|-------------|--|
| 205528_s_at  | RUNX1T1        | -1,888254346 | -2,408705138 | 0,520450792 |  |
| 221439_at    | RBBP9          | -1,888254346 | -2,408705138 | 0,520450792 |  |
| 222361_at    | TUBBP5         | -1,888254346 | -2,408705138 | 0,520450792 |  |
| 223859_at    | EPB41L4B       | -1,888254346 | -2,408705138 | 0,520450792 |  |
| 237677_at    | -              | -1,888254346 | -2,408705138 | 0,520450792 |  |
| 241292_at    | -              | -1,888254346 | -2,408705138 | 0,520450792 |  |
| 242164_s_at  | LRIG2          | -1,888254346 | -2,408705138 | 0,520450792 |  |
| 1560680_at   | -              | -0,299034815 | -0,819238336 | 0,520203521 |  |
| 202901_x_at  | CTSS           | -0,299034815 | -0,819238336 | 0,520203521 |  |
| 204841_s_at  | EEA1           | -0,299034815 | -0,819238336 | 0,520203521 |  |
| 220795_s_at  | BEGAIN         | -0,299034815 | -0,819238336 | 0,520203521 |  |
| 203172_at    | FXR2           | 2,478200152  | 1,958277216  | 0,519922936 |  |
| 212847_at    | -              | 2,05655332   | 1,536652708  | 0,519900612 |  |
| 227754_at    | -              | 1,835789711  | 1,315948728  | 0,519840983 |  |
| 230362_at    | INPP5F         | 0,417596971  | -0,102100538 | 0,519697508 |  |
| 1563641_a_at | SNX20          | -1,518072576 | -2,037551727 | 0,519479151 |  |
| 1564595_at   | -              | -1,518072576 | -2,037551727 | 0,519479151 |  |
| 201474_s_at  | ITGA3          | -1,518072576 | -2,037551727 | 0,519479151 |  |
| 204485_s_at  | TOM1L1         | -1,518072576 | -2,037551727 | 0,519479151 |  |
| 205890_s_at  | GABBR1 /// UBD | -1,518072576 | -2,037551727 | 0,519479151 |  |
| 211880_x_at  | PCDHGA1        | -1,518072576 | -2,037551727 | 0,519479151 |  |
| 214067_at    | TSR3           | -1,518072576 | -2,037551727 | 0,519479151 |  |
| 216657_at    | ATXN3          | -1,518072576 | -2,037551727 | 0,519479151 |  |
| 224026_at    | -              | -1,518072576 | -2,037551727 | 0,519479151 |  |
| 230377_s_at  | TBC1D2B        | -1,518072576 | -2,037551727 | 0,519479151 |  |
| 235565_at    | ZNF425         | -1,518072576 | -2,037551727 | 0,519479151 |  |
| 237153_at    | -              | -1,518072576 | -2,037551727 | 0,519479151 |  |
| 241164_at    | CHCHD3         | -1,518072576 | -2,037551727 | 0,519479151 |  |
| 243215_at    | -              | -1,518072576 | -2,037551727 | 0,519479151 |  |
| 244883_at    | -              | -1,518072576 | -2,037551727 | 0,519479151 |  |
| 1552774_a_at | SLC25A27       | -1,937711681 | -2,456406426 | 0,518694745 |  |
| 1553492_a_at | PAX1           | -1,937711681 | -2,456406426 | 0,518694745 |  |
| 1554476_x_at | ZNF808         | -1,937711681 | -2,456406426 | 0,518694745 |  |
| 1557179_s_at | CARS2          | -1,937711681 | -2,456406426 | 0,518694745 |  |
| 1559571_a_at | ATP13A4        | -1,937711681 | -2,456406426 | 0,518694745 |  |
| 1565599_at   | -              | -1,937711681 | -2,456406426 | 0,518694745 |  |
| 1568690_a_at | LOC100631378   | -1,937711681 | -2,456406426 | 0,518694745 |  |
| 217103_at    | LDLR           | -1,937711681 | -2,456406426 | 0,518694745 |  |
| 219563_at    | LINC00341      | -1,937711681 | -2,456406426 | 0,518694745 |  |
| 222838_at    | SLAMF7         | -1,937711681 | -2,456406426 | 0,518694745 |  |
| 228672_at    | -              | -1,937711681 | -2,456406426 | 0,518694745 |  |
| 234694_at    | CNTROB         | -1,937711681 | -2,456406426 | 0,518694745 |  |
| 235562_at    | C3orf70        | -1,937711681 | -2,456406426 | 0,518694745 |  |
| 237485_at    | SRSF3          | -1,937711681 | -2,456406426 | 0,518694745 |  |
| 215076_s_at  | COL3A1         | 0,57782909   | 0,059218869  | 0,518610222 |  |
| 219113_x_at  | HSD17B14       | 0,57782909   | 0,059218869  | 0,518610222 |  |
| 238554_at    | CYB5B          | 0,57782909   | 0,059218869  | 0,518610222 |  |
| 1560868_s_at | -              | 0,911589958  | 0,393761504  | 0,517828454 |  |
| 204432_at    | SOX12          | 0,911589958  | 0,393761504  | 0,517828454 |  |
| 244640_at    | ZNF850         | 4,465414103  | 3,947788666  | 0,517625436 |  |
| 1553697_at   | CCSAP          | -0,394749123 | -0,912331589 | 0,517582465 |  |
| 1554198_at   | SH3YL1         | -0,394749123 | -0,912331589 | 0,517582465 |  |
| 217573_at    | GRIN2C         | -0,394749123 | -0,912331589 | 0,517582465 |  |
| 218983_at    | C1RL           | -0,394749123 | -0,912331589 | 0,517582465 |  |
| 230933_at    | DSTN           | -0,394749123 | -0,912331589 | 0,517582465 |  |
| 235748_s_at  | -              | -0,394749123 | -0,912331589 | 0,517582465 |  |

|              |                 |              |              |             |  |
|--------------|-----------------|--------------|--------------|-------------|--|
| 1555413_s_at | FBXL21          | -2,262747984 | -2,780313924 | 0,51756594  |  |
| 1556804_s_at | POLR3B          | -2,262747984 | -2,780313924 | 0,51756594  |  |
| 1559664_at   | -               | -2,262747984 | -2,780313924 | 0,51756594  |  |
| 1559975_at   | BTG1            | -2,262747984 | -2,780313924 | 0,51756594  |  |
| 1569167_at   | -               | -2,262747984 | -2,780313924 | 0,51756594  |  |
| 208121_s_at  | PTPRO           | -2,262747984 | -2,780313924 | 0,51756594  |  |
| 217438_at    | -               | -2,262747984 | -2,780313924 | 0,51756594  |  |
| 220294_at    | KCNV1           | -2,262747984 | -2,780313924 | 0,51756594  |  |
| 229800_at    | DCLK1           | -2,262747984 | -2,780313924 | 0,51756594  |  |
| 232573_at    | -               | -2,262747984 | -2,780313924 | 0,51756594  |  |
| 239272_at    | MMP28           | -2,262747984 | -2,780313924 | 0,51756594  |  |
| 241097_at    | -               | -2,262747984 | -2,780313924 | 0,51756594  |  |
| 231812_x_at  | PHAX            | 2,114952142  | 1,59747851   | 0,517473632 |  |
| 243146_at    | -               | -2,756478458 | -3,273861381 | 0,517382923 |  |
| 202922_at    | GCLC            | 3,474545391  | 2,957221307  | 0,517324084 |  |
| 215159_s_at  | NADK            | 1,352503698  | 0,835239052  | 0,517264646 |  |
| 219151_s_at  | RABL2A /// RABL | 1,381753566  | 0,864649967  | 0,517103599 |  |
| 225901_at    | PTPMT1          | 1,381753566  | 0,864649967  | 0,517103599 |  |
| 1554885_a_at | LOC100653079 /  | 2,107467633  | 1,590454215  | 0,517013418 |  |
| 235717_at    | ZNF229          | 0,853119696  | 0,336136178  | 0,516983518 |  |
| 224836_at    | TP53INP2        | 1,631786706  | 1,115234684  | 0,516552022 |  |
| 1552897_a_at | KCNG3           | -2,479842156 | -2,996335703 | 0,516493547 |  |
| 1558373_s_at | -               | -2,479842156 | -2,996335703 | 0,516493547 |  |
| 1562281_at   | -               | -2,479842156 | -2,996335703 | 0,516493547 |  |
| 1563012_x_at | -               | -2,479842156 | -2,996335703 | 0,516493547 |  |
| 1563460_at   | -               | -2,479842156 | -2,996335703 | 0,516493547 |  |
| 215563_s_at  | MST1P9          | -2,479842156 | -2,996335703 | 0,516493547 |  |
| 231091_x_at  | -               | -2,479842156 | -2,996335703 | 0,516493547 |  |
| 226432_at    | ETNK1           | 0,97328325   | 0,456918297  | 0,516364953 |  |
| 204407_at    | TTF2            | 3,268508253  | 2,752192409  | 0,516315844 |  |
| 59705_at     | SCLY            | 0,223544425  | -0,292672097 | 0,516216523 |  |
| 224433_s_at  | DDX54           | 1,04816921   | 0,532164371  | 0,51600484  |  |
| 202743_at    | PIK3R3          | 1,926486359  | 1,410714371  | 0,515771988 |  |
| 225501_at    | PHF6            | 4,807809007  | 4,292109123  | 0,515699885 |  |
| 1555253_at   | COL25A1         | 1,119359127  | 0,603679647  | 0,515679481 |  |
| 1555970_at   | FBXO28          | 1,187200746  | 0,67181667   | 0,515384076 |  |
| 226797_at    | MBTD1           | 3,939667505  | 3,424287521  | 0,515379983 |  |
| 1553267_a_at | CNOT6L          | -1,026571149 | -1,541908042 | 0,515336893 |  |
| 1560279_a_at | LOC221122       | -1,026571149 | -1,541908042 | 0,515336893 |  |
| 1570135_at   | ZNF230          | -1,026571149 | -1,541908042 | 0,515336893 |  |
| 210875_s_at  | ZEB1            | -1,026571149 | -1,541908042 | 0,515336893 |  |
| 216376_x_at  | -               | -1,026571149 | -1,541908042 | 0,515336893 |  |
| 220928_s_at  | PRDM16          | -1,026571149 | -1,541908042 | 0,515336893 |  |
| 228675_at    | USP30-AS1       | -1,026571149 | -1,541908042 | 0,515336893 |  |
| 234210_x_at  | ACTR2           | -1,026571149 | -1,541908042 | 0,515336893 |  |
| 242402_x_at  | ARAP2           | -1,026571149 | -1,541908042 | 0,515336893 |  |
| 243628_at    | COPS7B          | -1,026571149 | -1,541908042 | 0,515336893 |  |
| 244452_at    | ERLEC1          | -1,026571149 | -1,541908042 | 0,515336893 |  |
| 1559052_s_at | PAK2            | 1,751865623  | 1,23718272   | 0,514682903 |  |
| 205227_at    | IL1RAP          | 2,206540699  | 1,692388143  | 0,514152557 |  |
| 1567213_at   | PNN             | 3,021441862  | 2,507538456  | 0,513903406 |  |
| 1552953_a_at | NEUROD2         | 0,123193849  | -0,39061235  | 0,513806199 |  |
| 1556727_at   | PRCD            | 0,123193849  | -0,39061235  | 0,513806199 |  |
| 240530_at    | -               | 0,123193849  | -0,39061235  | 0,513806199 |  |
| 214260_at    | COPS8           | 0,052199481  | -0,461594427 | 0,513793907 |  |
| 232115_at    | SLC39A3         | 0,255492549  | -0,258114234 | 0,513606783 |  |

|              |                 |              |              |             |  |
|--------------|-----------------|--------------|--------------|-------------|--|
| 1553193_at   | ZNF441          | 0,376672223  | -0,136643983 | 0,513316206 |  |
| 213536_s_at  | -               | 0,376672223  | -0,136643983 | 0,513316206 |  |
| 1553301_a_at | TMEM182         | -0,706943342 | -1,220210588 | 0,513267246 |  |
| 1558794_at   | LOC728190       | -0,706943342 | -1,220210588 | 0,513267246 |  |
| 1569537_at   | -               | -0,706943342 | -1,220210588 | 0,513267246 |  |
| 216112_at    | -               | -0,706943342 | -1,220210588 | 0,513267246 |  |
| 216801_at    | -               | -0,706943342 | -1,220210588 | 0,513267246 |  |
| 219476_at    | C1orf116        | -0,706943342 | -1,220210588 | 0,513267246 |  |
| 238905_at    | RHOJ            | -0,706943342 | -1,220210588 | 0,513267246 |  |
| 239825_at    | -               | -0,706943342 | -1,220210588 | 0,513267246 |  |
| 244695_at    | GHRLOS          | -0,706943342 | -1,220210588 | 0,513267246 |  |
| 226332_at    | FAM133B /// FAM | 3,159334685  | 2,646096941  | 0,513237744 |  |
| 214609_at    | PHOX2A          | -0,496991414 | -1,010192375 | 0,513200961 |  |
| 216509_x_at  | MLLT10          | -0,496991414 | -1,010192375 | 0,513200961 |  |
| 220735_s_at  | SENP7           | -0,496991414 | -1,010192375 | 0,513200961 |  |
| 237154_at    | -               | -0,496991414 | -1,010192375 | 0,513200961 |  |
| 208550_x_at  | KCNG2           | -0,43775896  | -0,950686014 | 0,512927054 |  |
| 235352_at    | MR1             | -0,43775896  | -0,950686014 | 0,512927054 |  |
| 204264_at    | CPT2            | 2,348755185  | 1,835911187  | 0,512843998 |  |
| 208090_s_at  | AIRE            | 0,592200562  | 0,079428135  | 0,512772426 |  |
| 210399_x_at  | FUT6            | 0,592200562  | 0,079428135  | 0,512772426 |  |
| 226849_at    | DENND1A         | 0,592200562  | 0,079428135  | 0,512772426 |  |
| 1560944_at   | SLC25A3P1       | -1,399512875 | -1,912089812 | 0,512576937 |  |
| 1567055_at   | OR1C1           | -1,399512875 | -1,912089812 | 0,512576937 |  |
| 206170_at    | ADRB2           | -1,399512875 | -1,912089812 | 0,512576937 |  |
| 208304_at    | CCR3            | -1,399512875 | -1,912089812 | 0,512576937 |  |
| 211111_at    | HGC6.3          | -1,399512875 | -1,912089812 | 0,512576937 |  |
| 216257_at    | SERPINB13       | -1,399512875 | -1,912089812 | 0,512576937 |  |
| 220766_at    | BTG4            | -1,399512875 | -1,912089812 | 0,512576937 |  |
| 231085_s_at  | -               | -1,399512875 | -1,912089812 | 0,512576937 |  |
| 236162_at    | LOC100287598    | -1,399512875 | -1,912089812 | 0,512576937 |  |
| 237171_at    | -               | -1,399512875 | -1,912089812 | 0,512576937 |  |
| 238698_at    | CASK            | -1,399512875 | -1,912089812 | 0,512576937 |  |
| 239063_at    | -               | -1,399512875 | -1,912089812 | 0,512576937 |  |
| 204429_s_at  | SLC2A5          | 0,735041319  | 0,222599095  | 0,512442225 |  |
| 1553810_a_at | KIAA1524        | 0,779676066  | 0,26733076   | 0,512345306 |  |
| 201801_s_at  | SLC29A1         | 1,666156729  | 1,153866761  | 0,512289967 |  |
| 205379_at    | CBR3            | 0,822971223  | 0,310717132  | 0,512254091 |  |
| 226321_at    | LYSMD3          | 2,915422315  | 2,403170156  | 0,512252159 |  |
| 219287_at    | KCNMB4          | 0,945567441  | 0,433557298  | 0,512010143 |  |
| 1552771_a_at | LIN9            | -2,063149277 | -2,575129729 | 0,511980452 |  |
| 1554185_at   | LOC554206       | -2,063149277 | -2,575129729 | 0,511980452 |  |
| 1556907_at   | ZNF474          | -2,063149277 | -2,575129729 | 0,511980452 |  |
| 1562320_at   | NAV2-AS5        | -2,063149277 | -2,575129729 | 0,511980452 |  |
| 1565680_at   | DIP2C           | -2,063149277 | -2,575129729 | 0,511980452 |  |
| 210279_at    | GPR18           | -2,063149277 | -2,575129729 | 0,511980452 |  |
| 222290_at    | OR2A20P /// OR2 | -2,063149277 | -2,575129729 | 0,511980452 |  |
| 224724_at    | SULF2           | -2,063149277 | -2,575129729 | 0,511980452 |  |
| 225622_at    | PAG1            | -2,063149277 | -2,575129729 | 0,511980452 |  |
| 230137_at    | TMEM155         | -2,063149277 | -2,575129729 | 0,511980452 |  |
| 232166_at    | KIAA1377        | -2,063149277 | -2,575129729 | 0,511980452 |  |
| 232425_at    | SNX25           | -2,063149277 | -2,575129729 | 0,511980452 |  |
| 234543_at    | -               | -2,063149277 | -2,575129729 | 0,511980452 |  |
| 236921_at    | -               | -2,063149277 | -2,575129729 | 0,511980452 |  |
| 240188_at    | -               | -2,063149277 | -2,575129729 | 0,511980452 |  |
| 242768_at    | -               | -2,063149277 | -2,575129729 | 0,511980452 |  |

|              |              |              |              |             |  |
|--------------|--------------|--------------|--------------|-------------|--|
| 225011_at    | PRKAR2A      | 5,026305189  | 4,514364405  | 0,511940784 |  |
| 201905_s_at  | CTDSPL       | 0,228146222  | -0,283667828 | 0,511814049 |  |
| 203373_at    | SOCS2        | 0,228146222  | -0,283667828 | 0,511814049 |  |
| 1558102_at   | -            | 0,291166226  | -0,220592223 | 0,511758449 |  |
| 205424_at    | TBKBP1       | 0,291166226  | -0,220592223 | 0,511758449 |  |
| 215240_at    | ITGB3        | 0,291166226  | -0,220592223 | 0,511758449 |  |
| 238573_at    | -            | 0,291166226  | -0,220592223 | 0,511758449 |  |
| 205214_at    | STK17B       | 2,531373922  | 2,019703483  | 0,511670439 |  |
| 215677_s_at  | BRF1         | 0,020670649  | -0,490927335 | 0,511597985 |  |
| 219802_at    | PYROXD1      | 0,020670649  | -0,490927335 | 0,511597985 |  |
| 239844_x_at  | C1orf228     | 0,020670649  | -0,490927335 | 0,511597985 |  |
| 1569532_a_at | LCN15        | 0,46522187   | -0,046302147 | 0,511524017 |  |
| 229754_at    | LOC100507297 | 0,46522187   | -0,046302147 | 0,511524017 |  |
| 1559210_at   | -            | 0,518867317  | 0,007421914  | 0,511445403 |  |
| 235663_at    | -            | 0,518867317  | 0,007421914  | 0,511445403 |  |
| 216475_at    | -            | 0,57058931   | 0,059218869  | 0,511370442 |  |
| 203002_at    | AMOTL2       | -0,055687482 | -0,566887459 | 0,511199977 |  |
| 212161_at    | AP2A2        | -0,055687482 | -0,566887459 | 0,511199977 |  |
| 231234_at    | CTSC         | -0,055687482 | -0,566887459 | 0,511199977 |  |
| 234364_at    | CKAP2        | -0,055687482 | -0,566887459 | 0,511199977 |  |
| 236246_x_at  | LOC653160    | -0,055687482 | -0,566887459 | 0,511199977 |  |
| 239197_s_at  | EZH1         | -0,055687482 | -0,566887459 | 0,511199977 |  |
| 221162_at    | HHLA1        | 0,715481152  | 0,204310755  | 0,511170396 |  |
| 228341_at    | NUDT16       | 0,760715727  | 0,249604176  | 0,511111551 |  |
| 230388_s_at  | KANSL1-AS1   | 0,760715727  | 0,249604176  | 0,511111551 |  |
| 222771_s_at  | MYEF2        | 0,888485433  | 0,377530647  | 0,510954787 |  |
| 203077_s_at  | SMAD2        | 2,842156496  | 2,331254065  | 0,510902431 |  |
| 1561927_at   | ANKUB1       | -2,667025278 | -3,177802286 | 0,510777009 |  |
| 209470_s_at  | GPM6A        | -2,667025278 | -3,177802286 | 0,510777009 |  |
| 205494_at    | ZNF821       | -0,136301282 | -0,646746079 | 0,510444796 |  |
| 219736_at    | TRIM36       | -0,136301282 | -0,646746079 | 0,510444796 |  |
| 240846_at    | PCBD2        | -0,136301282 | -0,646746079 | 0,510444796 |  |
| 202371_at    | TCEAL4       | 4,268075451  | 3,757867094  | 0,510208357 |  |
| 203711_s_at  | HIBCH        | 2,983784569  | 2,473581079  | 0,51020349  |  |
| 234995_at    | SPICE1       | 1,859746653  | 1,349621332  | 0,510125321 |  |
| 205310_at    | FBXO46       | 3,265148651  | 2,755336312  | 0,509812339 |  |
| 238623_at    | -            | 1,296557217  | 0,786897721  | 0,509659496 |  |
| 1555056_at   | CCNG2        | -0,221656139 | -0,730778808 | 0,509122669 |  |
| 1557569_at   | MPDU1        | -0,221656139 | -0,730778808 | 0,509122669 |  |
| 221061_at    | PKD2L1       | -0,221656139 | -0,730778808 | 0,509122669 |  |
| 232647_at    | PROCA1       | -0,221656139 | -0,730778808 | 0,509122669 |  |
| 1556426_at   | HEXA         | -1,353583928 | -1,862647763 | 0,509063835 |  |
| 208017_s_at  | MCF2         | -1,353583928 | -1,862647763 | 0,509063835 |  |
| 211718_at    | MGC2889      | -1,353583928 | -1,862647763 | 0,509063835 |  |
| 216568_x_at  | -            | -1,353583928 | -1,862647763 | 0,509063835 |  |
| 217018_at    | -            | -1,353583928 | -1,862647763 | 0,509063835 |  |
| 219820_at    | SLC6A16      | -1,353583928 | -1,862647763 | 0,509063835 |  |
| 220249_at    | HYAL4        | -1,353583928 | -1,862647763 | 0,509063835 |  |
| 221066_at    | RXFP3        | -1,353583928 | -1,862647763 | 0,509063835 |  |
| 230255_at    | GABRD        | -1,353583928 | -1,862647763 | 0,509063835 |  |
| 233024_at    | -            | -1,353583928 | -1,862647763 | 0,509063835 |  |
| 236182_at    | FAM185A      | -1,353583928 | -1,862647763 | 0,509063835 |  |
| 238298_at    | LOC100507058 | -1,353583928 | -1,862647763 | 0,509063835 |  |
| 239791_at    | HOXB-AS3     | -1,353583928 | -1,862647763 | 0,509063835 |  |
| 219074_at    | TMEM184C     | 3,248232277  | 2,739547836  | 0,508684441 |  |
| 220295_x_at  | DEPDC1       | 1,81142822   | 1,303116084  | 0,508312135 |  |

|              |                   |              |              |             |  |
|--------------|-------------------|--------------|--------------|-------------|--|
| 1560617_at   | LOC100128198      | -0,986356909 | -1,494668682 | 0,508311773 |  |
| 1564028_s_at | FAM115C           | -0,986356909 | -1,494668682 | 0,508311773 |  |
| 1569253_at   | INTS4             | -0,986356909 | -1,494668682 | 0,508311773 |  |
| 1569269_s_at | SRGAP1            | -0,986356909 | -1,494668682 | 0,508311773 |  |
| 214262_at    | TRIP6             | -0,986356909 | -1,494668682 | 0,508311773 |  |
| 217661_x_at  | SIX5              | -0,986356909 | -1,494668682 | 0,508311773 |  |
| 223938_at    | TEX35             | -0,986356909 | -1,494668682 | 0,508311773 |  |
| 230163_at    | GFRA1             | -0,986356909 | -1,494668682 | 0,508311773 |  |
| 231554_at    | TPD52L3           | -0,986356909 | -1,494668682 | 0,508311773 |  |
| 237880_at    | LOC100506457      | -0,986356909 | -1,494668682 | 0,508311773 |  |
| 239191_at    | -                 | -0,986356909 | -1,494668682 | 0,508311773 |  |
| 240374_at    | -                 | -0,986356909 | -1,494668682 | 0,508311773 |  |
| 243565_at    | CCDC150           | -0,986356909 | -1,494668682 | 0,508311773 |  |
| 214620_x_at  | PAM               | 2,59162628   | 2,083632167  | 0,507994113 |  |
| 225497_at    | ATE1              | 2,936695663  | 2,428994491  | 0,507701172 |  |
| 202742_s_at  | PRKACB            | 2,122398022  | 1,614891062  | 0,507506961 |  |
| 202790_at    | CLDN7             | -0,172274514 | -0,679763839 | 0,507489326 |  |
| 227989_at    | LTBP4             | -0,172274514 | -0,679763839 | 0,507489326 |  |
| 232837_at    | KIF13A            | -0,172274514 | -0,679763839 | 0,507489326 |  |
| 213034_at    | SIK3              | 2,654607516  | 2,147243253  | 0,507364264 |  |
| 224337_s_at  | FZD4              | -0,543051993 | -1,050406615 | 0,507354622 |  |
| 231050_at    | HRASLS5           | -0,543051993 | -1,050406615 | 0,507354622 |  |
| 202806_at    | DBN1              | 3,251631457  | 2,744302548  | 0,507328909 |  |
| 233558_s_at  | TRAPPC11          | 2,348755185  | 1,841838775  | 0,506916411 |  |
| 213046_at    | PABPN1            | 2,400710591  | 1,894118818  | 0,506591773 |  |
| 228851_s_at  | ENSA              | 3,281868968  | 2,775606361  | 0,506262608 |  |
| 226160_at    | H6PD              | 0,859074518  | 0,352836757  | 0,506237761 |  |
| 209884_s_at  | SLC4A7            | 2,525769574  | 2,019703483  | 0,506066092 |  |
| 232506_s_at  | C15orf41          | 0,728550685  | 0,222599095  | 0,505951591 |  |
| 232493_at    | -                 | 0,682279745  | 0,176436073  | 0,505843672 |  |
| 1556992_at   | LOC550112 /// LOC | -0,259832361 | -0,765504029 | 0,505671668 |  |
| 1564002_a_at | AKD1              | -0,259832361 | -0,765504029 | 0,505671668 |  |
| 207670_at    | KRT85             | -0,259832361 | -0,765504029 | 0,505671668 |  |
| 210056_at    | RND1              | -0,259832361 | -0,765504029 | 0,505671668 |  |
| 222005_s_at  | GNG3              | -0,259832361 | -0,765504029 | 0,505671668 |  |
| 231379_at    | LOC100507560      | -0,259832361 | -0,765504029 | 0,505671668 |  |
| 231955_s_at  | HIBADH            | 1,073999308  | 0,568365095  | 0,505634213 |  |
| 235273_at    | DYX1C1            | 1,073999308  | 0,568365095  | 0,505634213 |  |
| 225605_at    | TP53I13           | 1,000476627  | 0,495031851  | 0,505444777 |  |
| 1556684_at   | RPPH1             | 0,962260738  | 0,456918297  | 0,505342441 |  |
| 211557_x_at  | SLCO2B1           | 0,480753764  | -0,024572586 | 0,50532635  |  |
| 236634_at    | C8orf48           | 0,480753764  | -0,024572586 | 0,50532635  |  |
| 1552394_a_at | ENTHD1            | -2,384869671 | -2,89013181  | 0,505262139 |  |
| 1554108_at   | -                 | -2,384869671 | -2,89013181  | 0,505262139 |  |
| 1563673_a_at | ALS2CR11          | -2,384869671 | -2,89013181  | 0,505262139 |  |
| 1569773_at   | ATP8A1            | -2,384869671 | -2,89013181  | 0,505262139 |  |
| 1570125_at   | -                 | -2,384869671 | -2,89013181  | 0,505262139 |  |
| 1570345_at   | LINC00474         | -2,384869671 | -2,89013181  | 0,505262139 |  |
| 206282_at    | NEUROD1           | -2,384869671 | -2,89013181  | 0,505262139 |  |
| 234401_at    | -                 | -2,384869671 | -2,89013181  | 0,505262139 |  |
| 235874_at    | PRSS35            | -2,384869671 | -2,89013181  | 0,505262139 |  |
| 237548_at    | -                 | -2,384869671 | -2,89013181  | 0,505262139 |  |
| 235983_at    | -                 | 0,425644434  | -0,079522948 | 0,505167382 |  |
| 211596_s_at  | LRIG1             | 1,764611101  | 1,259496994  | 0,505114106 |  |
| 234192_s_at  | GKAP1             | 1,163336153  | 0,658444279  | 0,504891874 |  |
| 210355_at    | PTHLH             | 1,883312263  | 1,378453643  | 0,50485862  |  |



|              |                |              |              |             |  |
|--------------|----------------|--------------|--------------|-------------|--|
| 37117_at     | ARHGAP8 /// PR | -1,183481721 | -1,688334834 | 0,504853113 |  |
| 1560151_x_at | SLC29A2        | 0,30867765   | -0,19610998  | 0,50478763  |  |
| 215978_x_at  | ZNF721         | 3,899061119  | 3,394350331  | 0,504710789 |  |
| 214658_at    | TMED7 /// TMED | 3,723323886  | 3,218713651  | 0,504610235 |  |
| 1555862_s_at | MICALL2        | 0,246434561  | -0,258114234 | 0,504548795 |  |
| 1560639_at   | -              | 0,246434561  | -0,258114234 | 0,504548795 |  |
| 203281_s_at  | UBA7           | 0,246434561  | -0,258114234 | 0,504548795 |  |
| 228800_x_at  | AURKAIP1       | 0,246434561  | -0,258114234 | 0,504548795 |  |
| 243591_at    | -              | 0,246434561  | -0,258114234 | 0,504548795 |  |
| 243950_at    | -              | 0,246434561  | -0,258114234 | 0,504548795 |  |
| 203898_at    | CRCP           | 1,954567604  | 1,450051551  | 0,504516053 |  |
| 210812_at    | XRCC4          | -0,759588698 | -1,264005341 | 0,504416643 |  |
| 216222_s_at  | MYO10          | -0,759588698 | -1,264005341 | 0,504416643 |  |
| 234301_s_at  | TFB1M          | -0,759588698 | -1,264005341 | 0,504416643 |  |
| 236813_at    | MORN4          | -0,759588698 | -1,264005341 | 0,504416643 |  |
| 242338_at    | TMEM64         | 3,51093129   | 3,006869115  | 0,504062175 |  |
| 229371_at    | -              | 2,614687931  | 2,110887591  | 0,50380034  |  |
| 238800_s_at  | ZCCHC6         | 0,401366113  | -0,102100538 | 0,503466651 |  |
| 1555038_at   | EPB41L4A       | -2,187914861 | -2,690860744 | 0,502945883 |  |
| 215664_s_at  | EPHA5          | -2,187914861 | -2,690860744 | 0,502945883 |  |
| 234280_at    | REG3A          | -2,187914861 | -2,690860744 | 0,502945883 |  |
| 236973_at    | LOC100131662   | -2,187914861 | -2,690860744 | 0,502945883 |  |
| 242220_at    | SPTBN1         | -2,187914861 | -2,690860744 | 0,502945883 |  |
| 1552761_at   | SLC16A11       | -0,352951799 | -0,855751026 | 0,502799228 |  |
| 1560410_at   | -              | -0,352951799 | -0,855751026 | 0,502799228 |  |
| 207066_at    | HRC            | -0,352951799 | -0,855751026 | 0,502799228 |  |
| 210286_s_at  | SLC4A7         | -0,352951799 | -0,855751026 | 0,502799228 |  |
| 217642_at    | RNF40          | -0,352951799 | -0,855751026 | 0,502799228 |  |
| 229852_at    | NMNAT1         | -0,352951799 | -0,855751026 | 0,502799228 |  |
| 232481_s_at  | SLITRK6        | -0,352951799 | -0,855751026 | 0,502799228 |  |
| 1555980_a_at | LOC100130417   | -0,033456564 | -0,536087151 | 0,502630587 |  |
| 1559723_s_at | -              | -0,033456564 | -0,536087151 | 0,502630587 |  |
| 216451_at    | STK38          | -0,033456564 | -0,536087151 | 0,502630587 |  |
| 235495_at    | CCDC97         | -0,033456564 | -0,536087151 | 0,502630587 |  |
| 228961_at    | MIER3          | 2,573632254  | 2,071071048  | 0,502561206 |  |
| 1553327_a_at | BEND7          | -1,2845686   | -1,787089803 | 0,502521203 |  |
| 1555740_a_at | MRAP           | -1,2845686   | -1,787089803 | 0,502521203 |  |
| 1556148_s_at | -              | -1,2845686   | -1,787089803 | 0,502521203 |  |
| 1556477_a_at | LOC283485      | -1,2845686   | -1,787089803 | 0,502521203 |  |
| 1564709_at   | LOC286238      | -1,2845686   | -1,787089803 | 0,502521203 |  |
| 219670_at    | BEND5          | -1,2845686   | -1,787089803 | 0,502521203 |  |
| 223877_at    | C1QTNF7        | -1,2845686   | -1,787089803 | 0,502521203 |  |
| 238479_at    | DCUN1D5        | -1,2845686   | -1,787089803 | 0,502521203 |  |
| 240503_at    | -              | -1,2845686   | -1,787089803 | 0,502521203 |  |
| 241625_at    | -              | -1,2845686   | -1,787089803 | 0,502521203 |  |
| 241882_at    | CAMTA1         | -1,2845686   | -1,787089803 | 0,502521203 |  |
| 225984_at    | PRKAA1         | 2,600539826  | 2,098562556  | 0,501977269 |  |
| 211559_s_at  | CCNG2          | 1,434549838  | 0,932882274  | 0,501667564 |  |
| 1564803_at   | KRTAP11-1      | 0,083054335  | -0,41858459  | 0,501638924 |  |
| 1553168_at   | GRIK5          | -0,112808516 | -0,614371577 | 0,50156306  |  |
| 244149_at    | -              | -0,112808516 | -0,614371577 | 0,50156306  |  |
| 217503_at    | STK17B         | 1,556829052  | 1,055274826  | 0,501554226 |  |
| 1555153_s_at | FCHO2          | -2,597496523 | -3,098858316 | 0,501361793 |  |
| 243481_at    | RHOJ           | -2,597496523 | -3,098858316 | 0,501361793 |  |
| 229609_at    | LOC728190      | -0,83191556  | -1,332017329 | 0,500101769 |  |
| 221871_s_at  | TFG            | 0,95671774   | 0,456918297  | 0,499799443 |  |

|              |                  |              |              |             |  |
|--------------|------------------|--------------|--------------|-------------|--|
| 227926_s_at  | -                | 2,201862497  | 1,702196344  | 0,499666152 |  |
| 216609_at    | TXN              | 3,86543671   | 3,365837114  | 0,499599596 |  |
| 225619_at    | SLAIN1           | 2,779171778  | 2,27978304   | 0,499388738 |  |
| 243691_at    | -                | 1,05337236   | 0,553993624  | 0,499378735 |  |
| 217937_s_at  | HDAC7            | 1,987559146  | 1,488344553  | 0,499214594 |  |
| 210201_x_at  | BIN1             | 0,67554678   | 0,176436073  | 0,499110707 |  |
| 1552714_at   | CREG2            | -2,236765673 | -2,735862426 | 0,499096753 |  |
| 1553876_at   | SAMD3            | -2,236765673 | -2,735862426 | 0,499096753 |  |
| 1562856_at   | -                | -2,236765673 | -2,735862426 | 0,499096753 |  |
| 216777_at    | -                | -2,236765673 | -2,735862426 | 0,499096753 |  |
| 231867_at    | ODZ2             | -2,236765673 | -2,735862426 | 0,499096753 |  |
| 238168_at    | TM4SF1           | -2,236765673 | -2,735862426 | 0,499096753 |  |
| 241042_at    | -                | -2,236765673 | -2,735862426 | 0,499096753 |  |
| 241732_at    | -                | -2,236765673 | -2,735862426 | 0,499096753 |  |
| 206310_at    | SPINK2           | -0,655928373 | -1,154897679 | 0,498969306 |  |
| 211550_at    | EGFR             | -0,655928373 | -1,154897679 | 0,498969306 |  |
| 217643_x_at  | -                | -0,655928373 | -1,154897679 | 0,498969306 |  |
| 227403_at    | PIGX             | -0,655928373 | -1,154897679 | 0,498969306 |  |
| 231290_at    | RCCD1            | -0,655928373 | -1,154897679 | 0,498969306 |  |
| 238114_at    | PCMTD1           | -0,655928373 | -1,154897679 | 0,498969306 |  |
| 225385_s_at  | HNRPLL           | 2,510717331  | 2,011838132  | 0,498879199 |  |
| 1554780_a_at | PHTF2            | 0,627515113  | 0,128747141  | 0,498767972 |  |
| 1559765_a_at | LOC286254        | 0,627515113  | 0,128747141  | 0,498767972 |  |
| 210874_s_at  | NAT6             | 0,627515113  | 0,128747141  | 0,498767972 |  |
| 229719_s_at  | DERL3            | -0,148196756 | -0,646746079 | 0,498549322 |  |
| 237088_at    | -                | -0,148196756 | -0,646746079 | 0,498549322 |  |
| 221381_s_at  | MORF4L1          | 5,512036874  | 5,013671918  | 0,498364956 |  |
| 209748_at    | SPAST            | 3,722507547  | 3,22439681   | 0,498110737 |  |
| 227068_at    | LOC100652805 /   | 4,562580605  | 4,064545714  | 0,498034891 |  |
| 229920_at    | -                | 0,702292136  | 0,204310755  | 0,497981381 |  |
| 218911_at    | YEATS4           | 2,16388051   | 1,665902186  | 0,497978324 |  |
| 1562906_at   | FAM170A          | -0,512251684 | -1,010192375 | 0,497940691 |  |
| 1564012_at   | LOC100132354     | -0,512251684 | -1,010192375 | 0,497940691 |  |
| 216706_x_at  | IGHG1 /// LOC64  | -0,512251684 | -1,010192375 | 0,497940691 |  |
| 222911_s_at  | CXorf36          | -0,512251684 | -1,010192375 | 0,497940691 |  |
| 230305_at    | -                | -0,512251684 | -1,010192375 | 0,497940691 |  |
| 236904_x_at  | TECTA            | -0,512251684 | -1,010192375 | 0,497940691 |  |
| 237033_at    | FAM159A          | -0,512251684 | -1,010192375 | 0,497940691 |  |
| 238482_at    | KLF7             | -0,512251684 | -1,010192375 | 0,497940691 |  |
| 240280_at    | UFSP1            | -0,512251684 | -1,010192375 | 0,497940691 |  |
| 1556983_a_at | -                | -1,240169874 | -1,738067356 | 0,497897482 |  |
| 1557453_at   | -                | -1,240169874 | -1,738067356 | 0,497897482 |  |
| 1559136_s_at | IDS /// LOC10027 | -1,240169874 | -1,738067356 | 0,497897482 |  |
| 1563115_at   | -                | -1,240169874 | -1,738067356 | 0,497897482 |  |
| 210556_at    | NFATC3           | -1,240169874 | -1,738067356 | 0,497897482 |  |
| 231728_at    | CAPS             | -1,240169874 | -1,738067356 | 0,497897482 |  |
| 231758_at    | PRM3             | -1,240169874 | -1,738067356 | 0,497897482 |  |
| 233829_at    | C20orf118        | -1,240169874 | -1,738067356 | 0,497897482 |  |
| 236861_at    | -                | -1,240169874 | -1,738067356 | 0,497897482 |  |
| 240911_at    | NOS1             | -1,240169874 | -1,738067356 | 0,497897482 |  |
| 1553869_at   | SESN3            | -1,71423189  | -2,211750327 | 0,497518438 |  |
| 1562741_at   | UBXN4            | -1,71423189  | -2,211750327 | 0,497518438 |  |
| 202063_s_at  | SEL1L            | -1,71423189  | -2,211750327 | 0,497518438 |  |
| 206749_at    | CD1B             | -1,71423189  | -2,211750327 | 0,497518438 |  |
| 215828_at    | -                | -1,71423189  | -2,211750327 | 0,497518438 |  |
| 220873_at    | -                | -1,71423189  | -2,211750327 | 0,497518438 |  |

|              |                 |              |              |             |  |
|--------------|-----------------|--------------|--------------|-------------|--|
| 228133_s_at  | MYH11           | -1,71423189  | -2,211750327 | 0,497518438 |  |
| 229226_at    | -               | -1,71423189  | -2,211750327 | 0,497518438 |  |
| 229809_at    | POU6F1          | -1,71423189  | -2,211750327 | 0,497518438 |  |
| 231265_at    | COX7B2          | -1,71423189  | -2,211750327 | 0,497518438 |  |
| 232630_at    | APIP            | -1,71423189  | -2,211750327 | 0,497518438 |  |
| 235977_at    | LONRF2          | -1,71423189  | -2,211750327 | 0,497518438 |  |
| 237351_at    | LOC100652994 /  | -1,71423189  | -2,211750327 | 0,497518438 |  |
| 238919_at    | -               | -1,71423189  | -2,211750327 | 0,497518438 |  |
| 239087_at    | ANKS4B          | -1,71423189  | -2,211750327 | 0,497518438 |  |
| 242209_at    | ANKRD33         | -1,71423189  | -2,211750327 | 0,497518438 |  |
| 233557_s_at  | MON1B           | 1,40228911   | 0,904843258  | 0,497445851 |  |
| 210531_at    | NR2C1           | 0,606430281  | 0,109221392  | 0,497208889 |  |
| 238606_at    | ZNF747          | 0,417596971  | -0,079522948 | 0,497119919 |  |
| 217383_at    | PGK1            | 1,233777334  | 0,73688026   | 0,496897073 |  |
| 228050_at    | UTP15           | 2,396622324  | 1,899812471  | 0,496809853 |  |
| 239706_x_at  | -               | 0,555999837  | 0,059218869  | 0,496780968 |  |
| 242116_x_at  | -               | 0,555999837  | 0,059218869  | 0,496780968 |  |
| 226831_at    | SLC25A46        | 3,512821151  | 3,016072743  | 0,496748408 |  |
| 228773_at    | LOC100506100    | 1,201332287  | 0,704715219  | 0,496617068 |  |
| 206791_s_at  | PDE4C           | 1,390002893  | 0,893473268  | 0,496529626 |  |
| 233896_s_at  | PAPLN           | -0,234278768 | -0,730778808 | 0,49650004  |  |
| 235559_at    | FAM188B /// INM | -0,234278768 | -0,730778808 | 0,49650004  |  |
| 241680_at    | -               | -0,234278768 | -0,730778808 | 0,49650004  |  |
| 243118_at    | CEP57L1         | -0,234278768 | -0,730778808 | 0,49650004  |  |
| 1564684_at   | BTN2A2          | -0,926850548 | -1,423348341 | 0,496497793 |  |
| 207646_s_at  | CDY1 /// CDY1B  | -0,926850548 | -1,423348341 | 0,496497793 |  |
| 216081_at    | LAMA4           | -0,926850548 | -1,423348341 | 0,496497793 |  |
| 216324_at    | -               | -0,926850548 | -1,423348341 | 0,496497793 |  |
| 216330_s_at  | POU6F1          | -0,926850548 | -1,423348341 | 0,496497793 |  |
| 232901_at    | RARS2           | -0,926850548 | -1,423348341 | 0,496497793 |  |
| 233156_at    | RNASEH2B        | -0,926850548 | -1,423348341 | 0,496497793 |  |
| 200782_at    | ANXA5           | 4,295231314  | 3,798818761  | 0,496412553 |  |
| 212470_at    | SPAG9           | 3,279650757  | 2,783327323  | 0,496323434 |  |
| 1553651_at   | C18orf54        | -1,838812296 | -2,335104118 | 0,496291822 |  |
| 1557857_a_at | -               | -1,838812296 | -2,335104118 | 0,496291822 |  |
| 1558922_at   | -               | -1,838812296 | -2,335104118 | 0,496291822 |  |
| 1559086_at   | -               | -1,838812296 | -2,335104118 | 0,496291822 |  |
| 210920_x_at  | -               | -1,838812296 | -2,335104118 | 0,496291822 |  |
| 213714_at    | CACNB2          | -1,838812296 | -2,335104118 | 0,496291822 |  |
| 222948_s_at  | LOC100509751 /  | -1,838812296 | -2,335104118 | 0,496291822 |  |
| 224012_at    | ANKRD20A1 /// A | -1,838812296 | -2,335104118 | 0,496291822 |  |
| 229669_at    | LOC100507263    | -1,838812296 | -2,335104118 | 0,496291822 |  |
| 233596_at    | -               | -1,838812296 | -2,335104118 | 0,496291822 |  |
| 233820_at    | -               | -1,838812296 | -2,335104118 | 0,496291822 |  |
| 238733_at    | -               | -1,838812296 | -2,335104118 | 0,496291822 |  |
| 242628_at    | -               | -1,838812296 | -2,335104118 | 0,496291822 |  |
| 243703_x_at  | -               | -1,838812296 | -2,335104118 | 0,496291822 |  |
| 244611_at    | MED13           | -1,838812296 | -2,335104118 | 0,496291822 |  |
| 222603_at    | ERMP1           | 1,360921491  | 0,864649967  | 0,496271524 |  |
| 1556201_at   | RNASET2         | -1,591296941 | -2,086984744 | 0,495687802 |  |
| 1565566_a_at | -               | -1,591296941 | -2,086984744 | 0,495687802 |  |
| 204570_at    | COX7A1          | -1,591296941 | -2,086984744 | 0,495687802 |  |
| 215630_at    | -               | -1,591296941 | -2,086984744 | 0,495687802 |  |
| 230007_at    | JMJD1C          | -1,591296941 | -2,086984744 | 0,495687802 |  |
| 234682_at    | BTBD9           | -1,591296941 | -2,086984744 | 0,495687802 |  |
| 241397_at    | -               | -1,591296941 | -2,086984744 | 0,495687802 |  |

|              |                  |              |              |             |  |
|--------------|------------------|--------------|--------------|-------------|--|
| 215570_s_at  | ZNF780A /// ZNF  | 1,187200746  | 0,691645685  | 0,495555061 |  |
| 226479_at    | KBTBD6           | 1,187200746  | 0,691645685  | 0,495555061 |  |
| 239644_at    | -                | 1,187200746  | 0,691645685  | 0,495555061 |  |
| 1566722_a_at | SVEP1            | -2,64318869  | -3,138626879 | 0,495438189 |  |
| 211742_s_at  | EVI2B            | 1,153678675  | 0,658444279  | 0,495234396 |  |
| 219603_s_at  | ZNF226           | 1,649074067  | 1,153866761  | 0,495207305 |  |
| 239891_x_at  | RAB12            | 2,691784869  | 2,196649505  | 0,495135364 |  |
| 213118_at    | UHRF1BP1L        | 1,709647566  | 1,214517879  | 0,495129687 |  |
| 224658_x_at  | PACS1            | 0,928678725  | 0,433557298  | 0,495121427 |  |
| 205791_x_at  | ZNF230           | 1,560488174  | 1,065442793  | 0,495045381 |  |
| 238686_at    | FBXO3            | 1,560488174  | 1,065442793  | 0,495045381 |  |
| 1554349_at   | XRCC6BP1         | 0,171847695  | -0,322870281 | 0,494717977 |  |
| 204202_at    | IQCE             | 0,171847695  | -0,322870281 | 0,494717977 |  |
| 217117_x_at  | MUC3A            | 0,334552598  | -0,160136748 | 0,494689347 |  |
| 203735_x_at  | PPFIBP1          | 2,438982012  | 1,944570415  | 0,494411597 |  |
| 1554934_at   | RCBTB1           | -2,779459409 | -3,273861381 | 0,494401973 |  |
| 1566251_at   | SH3GL1P1         | -2,779459409 | -3,273861381 | 0,494401973 |  |
| 1559864_at   | LCN6             | -1,047650486 | -1,541908042 | 0,494257556 |  |
| 1562844_at   | LOC339822        | -1,047650486 | -1,541908042 | 0,494257556 |  |
| 206744_s_at  | ZMYM5            | -1,047650486 | -1,541908042 | 0,494257556 |  |
| 208220_x_at  | AMELY            | -1,047650486 | -1,541908042 | 0,494257556 |  |
| 211118_x_at  | ESR2             | -1,047650486 | -1,541908042 | 0,494257556 |  |
| 215061_at    | METTL10          | -1,047650486 | -1,541908042 | 0,494257556 |  |
| 216339_s_at  | TNXA /// TNXB    | -1,047650486 | -1,541908042 | 0,494257556 |  |
| 217111_at    | AMACR            | -1,047650486 | -1,541908042 | 0,494257556 |  |
| 220430_at    | FAM110D          | -1,047650486 | -1,541908042 | 0,494257556 |  |
| 227673_at    | ZNRD1            | -1,047650486 | -1,541908042 | 0,494257556 |  |
| 228295_at    | WDR59            | -1,047650486 | -1,541908042 | 0,494257556 |  |
| 240048_at    | STRC             | -1,047650486 | -1,541908042 | 0,494257556 |  |
| 205686_s_at  | CD86             | -1,543331864 | -2,037551727 | 0,494219862 |  |
| 220699_s_at  | KIF2A            | -1,543331864 | -2,037551727 | 0,494219862 |  |
| 222153_at    | MYEF2            | -1,543331864 | -2,037551727 | 0,494219862 |  |
| 231527_at    | FLJ36840         | -1,543331864 | -2,037551727 | 0,494219862 |  |
| 232256_s_at  | LOC401321        | -1,543331864 | -2,037551727 | 0,494219862 |  |
| 234293_x_at  | -                | -1,543331864 | -2,037551727 | 0,494219862 |  |
| 242772_x_at  | -                | -1,543331864 | -2,037551727 | 0,494219862 |  |
| 243989_at    | -                | -1,543331864 | -2,037551727 | 0,494219862 |  |
| 244263_at    | -                | -1,543331864 | -2,037551727 | 0,494219862 |  |
| 207127_s_at  | HNRNPH3          | 4,725454911  | 4,231314909  | 0,494140002 |  |
| 1554095_at   | RBM33            | 2,410880861  | 1,916759838  | 0,494121023 |  |
| 221826_at    | ANGEL2           | 1,523472489  | 1,029536893  | 0,493935596 |  |
| 209532_at    | PLAA             | 0,911589958  | 0,417770464  | 0,493819495 |  |
| 217635_s_at  | POLG             | 0,911589958  | 0,417770464  | 0,493819495 |  |
| 218167_at    | AMZ2             | 3,692807389  | 3,199221717  | 0,493585672 |  |
| 1554583_a_at | METTL20          | -0,325749314 | -0,819238336 | 0,493489022 |  |
| 219545_at    | KCTD14 /// NDU1  | -0,325749314 | -0,819238336 | 0,493489022 |  |
| 222676_at    | BRI3 /// FLJ3006 | -0,325749314 | -0,819238336 | 0,493489022 |  |
| 223718_at    | ACRBP            | -0,325749314 | -0,819238336 | 0,493489022 |  |
| 228178_s_at  | -                | -0,325749314 | -0,819238336 | 0,493489022 |  |
| 230731_x_at  | ZDHHC8           | -0,325749314 | -0,819238336 | 0,493489022 |  |
| 224946_s_at  | CCDC115          | 3,105247586  | 2,611817827  | 0,493429759 |  |
| 222751_at    | HERPUD2          | 3,480351894  | 2,986947093  | 0,493404801 |  |
| 1558237_x_at | -                | 0,87091093   | 0,377530647  | 0,493380283 |  |
| 219262_at    | SUV39H2          | 0,87091093   | 0,377530647  | 0,493380283 |  |
| 242521_at    | LOC100505812     | 3,307136232  | 2,813804482  | 0,49333175  |  |
| 1569361_a_at | LOC100129098     | 0,209623097  | -0,283667828 | 0,493290925 |  |

|              |                 |              |              |             |  |
|--------------|-----------------|--------------|--------------|-------------|--|
| 204268_at    | S100A2          | 0,209623097  | -0,283667828 | 0,493290925 |  |
| 227364_at    | -               | 3,882346871  | 3,38929984   | 0,493047031 |  |
| 217368_at    | -               | 0,82905153   | 0,336136178  | 0,492915353 |  |
| 230226_s_at  | KDM5A           | 1,795990708  | 1,303116084  | 0,492874623 |  |
| 204693_at    | CDC42EP1        | 0,03125738   | -0,461594427 | 0,492851807 |  |
| 232761_at    | COX4I2          | 0,03125738   | -0,461594427 | 0,492851807 |  |
| 1554915_a_at | PDE12           | 2,236584753  | 1,743944487  | 0,492640265 |  |
| 217448_s_at  | TOX4            | 1,493160564  | 1,000684521  | 0,492476043 |  |
| 1556222_at   | SEPT7L          | -1,964176657 | -2,456406426 | 0,492229769 |  |
| 232023_at    | TMEM67          | -1,964176657 | -2,456406426 | 0,492229769 |  |
| 236727_at    | -               | -1,964176657 | -2,456406426 | 0,492229769 |  |
| 238833_at    | LOC729088       | -1,964176657 | -2,456406426 | 0,492229769 |  |
| 242980_at    | COMMD10         | -1,964176657 | -2,456406426 | 0,492229769 |  |
| 201407_s_at  | PPP1CB          | 3,976425635  | 3,484256382  | 0,492169253 |  |
| 1557044_at   | LOC100506930    | -2,504600601 | -2,996335703 | 0,491735102 |  |
| 1561229_at   | -               | -2,504600601 | -2,996335703 | 0,491735102 |  |
| 1568589_at   | -               | -2,504600601 | -2,996335703 | 0,491735102 |  |
| 216740_at    | -               | -2,504600601 | -2,996335703 | 0,491735102 |  |
| 222291_at    | FAM149A         | -2,504600601 | -2,996335703 | 0,491735102 |  |
| 231586_at    | SRG7            | -2,504600601 | -2,996335703 | 0,491735102 |  |
| 237101_at    | GHSR            | -2,504600601 | -2,996335703 | 0,491735102 |  |
| 237149_at    | -               | -2,504600601 | -2,996335703 | 0,491735102 |  |
| 239673_at    | -               | -2,504600601 | -2,996335703 | 0,491735102 |  |
| 207018_s_at  | RAB27B          | 3,350052045  | 2,858346012  | 0,491706032 |  |
| 1553303_at   | C16orf46        | 0,072842263  | -0,41858459  | 0,491426852 |  |
| 205188_s_at  | SMAD5           | 0,072842263  | -0,41858459  | 0,491426852 |  |
| 213770_at    | KSR1            | 0,072842263  | -0,41858459  | 0,491426852 |  |
| 220778_x_at  | SEMA6B          | 0,072842263  | -0,41858459  | 0,491426852 |  |
| 222304_x_at  | LOC100509541 /  | 0,072842263  | -0,41858459  | 0,491426852 |  |
| 213373_s_at  | CASP8           | 1,556829052  | 1,065442793  | 0,491386259 |  |
| 214223_at    | -               | 0,695652136  | 0,204310755  | 0,491341381 |  |
| 235640_at    | -               | 0,695652136  | 0,204310755  | 0,491341381 |  |
| 226879_at    | HVCN1           | 0,57058931   | 0,079428135  | 0,491161175 |  |
| 202502_at    | ACADM           | 4,817780426  | 4,326864571  | 0,490915855 |  |
| 235413_at    | GGCX            | 0,648296226  | 0,157549243  | 0,490746983 |  |
| 1557235_at   | -               | -1,470833215 | -1,961547147 | 0,490713932 |  |
| 1557544_at   | CCDC147         | -1,470833215 | -1,961547147 | 0,490713932 |  |
| 1560024_at   | -               | -1,470833215 | -1,961547147 | 0,490713932 |  |
| 219380_x_at  | POLH            | -1,470833215 | -1,961547147 | 0,490713932 |  |
| 233200_at    | -               | -1,470833215 | -1,961547147 | 0,490713932 |  |
| 233340_at    | SPINK13         | -1,470833215 | -1,961547147 | 0,490713932 |  |
| 237857_at    | -               | -1,470833215 | -1,961547147 | 0,490713932 |  |
| 240042_at    | FIBCD1          | -1,470833215 | -1,961547147 | 0,490713932 |  |
| 241857_at    | -               | -1,470833215 | -1,961547147 | 0,490713932 |  |
| 243647_at    | -               | -1,470833215 | -1,961547147 | 0,490713932 |  |
| 214791_at    | SP140L          | 2,390468117  | 1,899812471  | 0,490655646 |  |
| 229832_x_at  | SH3TC1          | 0,518867317  | 0,028364014  | 0,490503303 |  |
| 235332_at    | FAM22A /// FAM2 | 0,518867317  | 0,028364014  | 0,490503303 |  |
| 213000_at    | MORC3           | 4,122199215  | 3,631821253  | 0,490377962 |  |
| 214057_at    | MCL1            | 2,122398022  | 1,632095957  | 0,490302066 |  |
| 230578_at    | -               | -0,00073712  | -0,490927335 | 0,490190215 |  |
| 234381_at    | -               | -0,00073712  | -0,490927335 | 0,490190215 |  |
| 237709_at    | LOC100507513    | -0,00073712  | -0,490927335 | 0,490190215 |  |
| 1560482_at   | -               | -2,01371626  | -2,503677622 | 0,489961362 |  |
| 219049_at    | CSGALNACT1      | -2,01371626  | -2,503677622 | 0,489961362 |  |
| 220197_at    | ATP6V0A4        | -2,01371626  | -2,503677622 | 0,489961362 |  |

|              |                  |              |              |             |  |
|--------------|------------------|--------------|--------------|-------------|--|
| 220906_at    | -                | -2,01371626  | -2,503677622 | 0,489961362 |  |
| 233989_at    | -                | -2,01371626  | -2,503677622 | 0,489961362 |  |
| 236539_at    | PTPN22           | -2,01371626  | -2,503677622 | 0,489961362 |  |
| 240268_at    | LOC440117        | -2,01371626  | -2,503677622 | 0,489961362 |  |
| 242162_at    | WDR69            | -2,01371626  | -2,503677622 | 0,489961362 |  |
| 1558421_a_at | C14orf180        | -0,622910612 | -1,112851844 | 0,489941232 |  |
| 1568745_at   | LOC646268        | -0,622910612 | -1,112851844 | 0,489941232 |  |
| 1570507_at   | SCAF11           | -0,622910612 | -1,112851844 | 0,489941232 |  |
| 205969_at    | AADAC            | -0,622910612 | -1,112851844 | 0,489941232 |  |
| 220516_at    | ZSCAN2           | -0,622910612 | -1,112851844 | 0,489941232 |  |
| 224143_at    | TTY8 /// TTY8    | -0,622910612 | -1,112851844 | 0,489941232 |  |
| 224990_at    | C4orf34          | -0,622910612 | -1,112851844 | 0,489941232 |  |
| 228873_at    | COL22A1          | -0,622910612 | -1,112851844 | 0,489941232 |  |
| 229924_s_at  | -                | -0,622910612 | -1,112851844 | 0,489941232 |  |
| 230893_at    | DNAJC21          | -0,622910612 | -1,112851844 | 0,489941232 |  |
| 232208_at    | ISLR2            | -0,622910612 | -1,112851844 | 0,489941232 |  |
| 236754_at    | PPP1R2           | -0,622910612 | -1,112851844 | 0,489941232 |  |
| 1557296_at   | FLJ12825         | -1,173767127 | -1,663414495 | 0,489647368 |  |
| 1558144_at   | MEG3             | -1,173767127 | -1,663414495 | 0,489647368 |  |
| 1561185_at   | TTY7             | -1,173767127 | -1,663414495 | 0,489647368 |  |
| 205001_s_at  | DDX3Y            | -1,173767127 | -1,663414495 | 0,489647368 |  |
| 209460_at    | ABAT             | -1,173767127 | -1,663414495 | 0,489647368 |  |
| 219140_s_at  | RBP4             | -1,173767127 | -1,663414495 | 0,489647368 |  |
| 224020_at    | MGC4473          | -1,173767127 | -1,663414495 | 0,489647368 |  |
| 229247_at    | FBLN7            | -1,173767127 | -1,663414495 | 0,489647368 |  |
| 229921_at    | -                | -1,173767127 | -1,663414495 | 0,489647368 |  |
| 230056_at    | BPTF             | -1,173767127 | -1,663414495 | 0,489647368 |  |
| 233538_s_at  | CYBB             | -1,173767127 | -1,663414495 | 0,489647368 |  |
| 200673_at    | LAPTM4A          | 5,701259584  | 5,211772284  | 0,4894873   |  |
| 238523_at    | KLHL36           | 1,079110292  | 0,589657387  | 0,489452905 |  |
| 1552263_at   | MAPK1            | 2,310153708  | 1,820984782  | 0,489168926 |  |
| 211410_x_at  | KIR2DL2 /// KIR2 | -0,423248115 | -0,912331589 | 0,489083473 |  |
| 227503_at    | -                | -0,423248115 | -0,912331589 | 0,489083473 |  |
| 213231_at    | DMWD             | -0,366776884 | -0,855751026 | 0,488974142 |  |
| 228653_at    | SAMD5            | -0,366776884 | -0,855751026 | 0,488974142 |  |
| 243214_at    | ZBTB46           | -0,366776884 | -0,855751026 | 0,488974142 |  |
| 204708_at    | MAPK4            | -0,888496123 | -1,377419394 | 0,488923272 |  |
| 205147_x_at  | NCF4             | -0,888496123 | -1,377419394 | 0,488923272 |  |
| 210915_x_at  | TRBC1            | -0,888496123 | -1,377419394 | 0,488923272 |  |
| 220859_at    | -                | -0,888496123 | -1,377419394 | 0,488923272 |  |
| 224924_at    | TTC7A            | -0,888496123 | -1,377419394 | 0,488923272 |  |
| 226418_at    | ERGIC2           | -0,888496123 | -1,377419394 | 0,488923272 |  |
| 227083_at    | B3GALT1          | -0,888496123 | -1,377419394 | 0,488923272 |  |
| 229820_at    | LOC440993        | -0,888496123 | -1,377419394 | 0,488923272 |  |
| 229996_s_at  | PCGF5            | -0,888496123 | -1,377419394 | 0,488923272 |  |
| 223812_at    | FAM178B          | 0,882651021  | 0,393761504  | 0,488889517 |  |
| 226099_at    | ELL2             | 3,848325987  | 3,359653127  | 0,488672861 |  |
| 226337_at    | GORAB            | 1,666156729  | 1,177496821  | 0,488659908 |  |
| 220689_at    | -                | -0,078265071 | -0,566887459 | 0,488622388 |  |
| 242458_at    | RALGPS2          | -0,078265071 | -0,566887459 | 0,488622388 |  |
| 224284_x_at  | FKSG49           | 1,603688695  | 1,115234684  | 0,48845401  |  |
| 205653_at    | CTSG             | 0,351548291  | -0,136643983 | 0,488192274 |  |
| 228029_at    | ZNF721           | 3,214953914  | 2,726791458  | 0,488162456 |  |
| 226449_at    | CEP120           | 2,382221458  | 1,894118818  | 0,48810264  |  |
| 1556199_a_at | RGS9BP           | -1,424023738 | -1,912089812 | 0,488066074 |  |
| 1556761_at   | -                | -1,424023738 | -1,912089812 | 0,488066074 |  |

|              |                 |              |              |             |  |
|--------------|-----------------|--------------|--------------|-------------|--|
| 1559936_at   | -               | -1,424023738 | -1,912089812 | 0,488066074 |  |
| 1565737_at   | SCTR            | -1,424023738 | -1,912089812 | 0,488066074 |  |
| 207464_at    | AHCYL1          | -1,424023738 | -1,912089812 | 0,488066074 |  |
| 212755_at    | MON2            | -1,424023738 | -1,912089812 | 0,488066074 |  |
| 219308_s_at  | AK5             | -1,424023738 | -1,912089812 | 0,488066074 |  |
| 228982_s_at  | USP42           | -1,424023738 | -1,912089812 | 0,488066074 |  |
| 230043_at    | MUC20           | -1,424023738 | -1,912089812 | 0,488066074 |  |
| 238276_at    | -               | -1,424023738 | -1,912089812 | 0,488066074 |  |
| 239972_at    | -               | -1,424023738 | -1,912089812 | 0,488066074 |  |
| 207495_at    | RAB28           | 0,44160593   | -0,046302147 | 0,487908077 |  |
| 240574_at    | DNAJC3-AS1      | 0,44160593   | -0,046302147 | 0,487908077 |  |
| 206730_at    | GRIA3           | -2,823166348 | -3,311072652 | 0,487906304 |  |
| 201656_at    | ITGA6           | 2,146943689  | 1,659204017  | 0,487739673 |  |
| 1552332_at   | TRIOBP          | 1,224581536  | 0,73688026   | 0,487701275 |  |
| 1554812_at   | CLDN20          | -2,359436556 | -2,847001814 | 0,487565258 |  |
| 1556648_a_at | C10orf40        | -2,359436556 | -2,847001814 | 0,487565258 |  |
| 1564331_at   | ZNF846          | -2,359436556 | -2,847001814 | 0,487565258 |  |
| 206515_at    | CYP4F3          | -2,359436556 | -2,847001814 | 0,487565258 |  |
| 207033_at    | GIF             | -2,359436556 | -2,847001814 | 0,487565258 |  |
| 220559_at    | EN1             | -2,359436556 | -2,847001814 | 0,487565258 |  |
| 231138_at    | TRPC5OS         | -2,359436556 | -2,847001814 | 0,487565258 |  |
| 242291_at    | EIF4ENIF1       | -2,359436556 | -2,847001814 | 0,487565258 |  |
| 227007_at    | TMCO4           | 0,291166226  | -0,19610998  | 0,487276206 |  |
| 222137_at    | CC2D1A          | 0,384950573  | -0,102100538 | 0,487051111 |  |
| 226550_at    | SLC9A7          | 1,292162421  | 0,805216064  | 0,486946357 |  |
| 1559190_s_at | RDH13           | 1,210676994  | 0,724100169  | 0,486576825 |  |
| 214898_x_at  | MUC3B           | 0,228146222  | -0,258114234 | 0,486260455 |  |
| 218550_s_at  | LRRC20          | 0,228146222  | -0,258114234 | 0,486260455 |  |
| 231776_at    | EOMES           | 0,228146222  | -0,258114234 | 0,486260455 |  |
| 211636_at    | IGHA1 /// IGHA2 | -2,551294263 | -3,037500868 | 0,486206605 |  |
| 231841_s_at  | KIAA1462        | -2,551294263 | -3,037500868 | 0,486206605 |  |
| 233002_at    | PPP4R4          | -2,551294263 | -3,037500868 | 0,486206605 |  |
| 240711_at    | -               | -2,551294263 | -3,037500868 | 0,486206605 |  |
| 242186_x_at  | LPHN3           | -2,551294263 | -3,037500868 | 0,486206605 |  |
| 226346_at    | MEX3A           | 1,177702228  | 0,691645685  | 0,486056542 |  |
| 1552979_at   | LINC00471       | -2,089474779 | -2,575129729 | 0,48565495  |  |
| 1556332_at   | -               | -2,089474779 | -2,575129729 | 0,48565495  |  |
| 1557880_at   | PCDH11X /// PC  | -2,089474779 | -2,575129729 | 0,48565495  |  |
| 1560286_s_at | -               | -2,089474779 | -2,575129729 | 0,48565495  |  |
| 1562130_at   | IQCA1           | -2,089474779 | -2,575129729 | 0,48565495  |  |
| 1562245_a_at | ZNF578          | -2,089474779 | -2,575129729 | 0,48565495  |  |
| 1563427_at   | -               | -2,089474779 | -2,575129729 | 0,48565495  |  |
| 1565887_at   | TRPM7           | -2,089474779 | -2,575129729 | 0,48565495  |  |
| 207632_at    | MUSK            | -2,089474779 | -2,575129729 | 0,48565495  |  |
| 216238_s_at  | FGB             | -2,089474779 | -2,575129729 | 0,48565495  |  |
| 221151_at    | PRDM9           | -2,089474779 | -2,575129729 | 0,48565495  |  |
| 234065_at    | -               | -2,089474779 | -2,575129729 | 0,48565495  |  |
| 240549_at    | -               | -2,089474779 | -2,575129729 | 0,48565495  |  |
| 241403_at    | CLK4            | -2,089474779 | -2,575129729 | 0,48565495  |  |
| 208169_s_at  | PTGER3          | 0,661985843  | 0,176436073  | 0,485549769 |  |
| 235798_at    | TMEM170B        | 0,661985843  | 0,176436073  | 0,485549769 |  |
| 224352_s_at  | CFL2            | 2,266015882  | 1,781437557  | 0,484578325 |  |
| 1553145_at   | FLJ39653        | -1,131062212 | -1,615132408 | 0,484070195 |  |
| 1557417_s_at | RSPH10B /// RSP | -1,131062212 | -1,615132408 | 0,484070195 |  |
| 1562412_at   | -               | -1,131062212 | -1,615132408 | 0,484070195 |  |
| 1568789_at   | UHRF1BP1        | -1,131062212 | -1,615132408 | 0,484070195 |  |

|              |                 |              |              |             |  |
|--------------|-----------------|--------------|--------------|-------------|--|
| 205464_at    | SCNN1B          | -1,131062212 | -1,615132408 | 0,484070195 |  |
| 220857_at    | -               | -1,131062212 | -1,615132408 | 0,484070195 |  |
| 227429_at    | EFCAB4A         | -1,131062212 | -1,615132408 | 0,484070195 |  |
| 227863_at    | IFITM10         | -1,131062212 | -1,615132408 | 0,484070195 |  |
| 230115_at    | DKFZp779M0652   | -1,131062212 | -1,615132408 | 0,484070195 |  |
| 242486_at    | -               | 1,549482847  | 1,065442793  | 0,484040054 |  |
| 243916_x_at  | UBLCP1          | 3,612245157  | 3,128242026  | 0,48400313  |  |
| 217904_s_at  | BACE1           | 0,20027154   | -0,283667828 | 0,483939367 |  |
| 231724_at    | MED26           | 0,20027154   | -0,283667828 | 0,483939367 |  |
| 243948_at    | -               | 1,874520207  | 1,390636111  | 0,483884095 |  |
| 222637_at    | COMMD10         | 2,549899391  | 2,066015817  | 0,483883574 |  |
| 214202_at    | -               | 0,641402394  | 0,157549243  | 0,483853151 |  |
| 222844_s_at  | SRR             | 0,641402394  | 0,157549243  | 0,483853151 |  |
| 226394_at    | 05.03.15        | 2,027765132  | 1,543943227  | 0,483821905 |  |
| 235416_at    | LOC643201       | 1,037706275  | 0,553993624  | 0,483712651 |  |
| 202486_at    | AFG3L2          | 3,593615441  | 3,109937707  | 0,483677734 |  |
| 203367_at    | DUSP14          | 2,536956583  | 2,053299695  | 0,483656888 |  |
| 211300_s_at  | TP53            | 1,348276312  | 0,864649967  | 0,483626344 |  |
| 1554158_at   | ZMYND11         | -0,467091869 | -0,950686014 | 0,483594146 |  |
| 1557558_s_at | MATN1-AS1       | -0,467091869 | -0,950686014 | 0,483594146 |  |
| 207601_at    | SULT1B1         | -0,467091869 | -0,950686014 | 0,483594146 |  |
| 208553_at    | HIST1H1E        | -0,467091869 | -0,950686014 | 0,483594146 |  |
| 203332_s_at  | INPP5D          | 2,325288363  | 1,841838775  | 0,483449589 |  |
| 204320_at    | COL11A1         | 2,64946283   | 2,166264721  | 0,483198109 |  |
| 202553_s_at  | SYF2            | 3,767525744  | 3,284389368  | 0,483136376 |  |
| 1552863_a_at | CACNG6          | 1,318332599  | 0,835239052  | 0,483093547 |  |
| 201228_s_at  | ARIH2           | 1,318332599  | 0,835239052  | 0,483093547 |  |
| 223493_at    | FBXO4           | 1,269985355  | 0,786897721  | 0,483087633 |  |
| 215754_at    | SCARB2          | -0,196756757 | -0,679763839 | 0,483007082 |  |
| 228604_at    | FAM76A          | -0,196756757 | -0,679763839 | 0,483007082 |  |
| 224905_at    | WDR26           | 2,433006244  | 1,950068772  | 0,482937472 |  |
| 209626_s_at  | OSBPL3          | 2,001086023  | 1,518263577  | 0,482822446 |  |
| 1554379_a_at | TP73            | 0,133056859  | -0,34958478  | 0,482641639 |  |
| 203703_s_at  | TTLL4           | 0,133056859  | -0,34958478  | 0,482641639 |  |
| 242981_at    | -               | 0,133056859  | -0,34958478  | 0,482641639 |  |
| 1553502_a_at | AKAP2 /// PALM2 | -2,138804305 | -2,621331989 | 0,482527684 |  |
| 1561710_at   | SNX19           | -2,138804305 | -2,621331989 | 0,482527684 |  |
| 205183_at    | -               | -2,138804305 | -2,621331989 | 0,482527684 |  |
| 206140_at    | LHX2            | -2,138804305 | -2,621331989 | 0,482527684 |  |
| 211108_s_at  | JAK3            | -2,138804305 | -2,621331989 | 0,482527684 |  |
| 212992_at    | AHNAK2          | -2,138804305 | -2,621331989 | 0,482527684 |  |
| 217375_at    | -               | -2,138804305 | -2,621331989 | 0,482527684 |  |
| 219871_at    | FLJ13197        | -2,138804305 | -2,621331989 | 0,482527684 |  |
| 220394_at    | FGF20           | -2,138804305 | -2,621331989 | 0,482527684 |  |
| 222877_at    | -               | -2,138804305 | -2,621331989 | 0,482527684 |  |
| 231661_at    | REG3G           | -2,138804305 | -2,621331989 | 0,482527684 |  |
| 237094_at    | FAM19A5         | -2,138804305 | -2,621331989 | 0,482527684 |  |
| 238271_x_at  | -               | -2,138804305 | -2,621331989 | 0,482527684 |  |
| 239744_at    | -               | -2,138804305 | -2,621331989 | 0,482527684 |  |
| 209298_s_at  | ITSN1           | 0,962260738  | 0,479907041  | 0,482353697 |  |
| 1553525_at   | NLRP13          | 0,020670649  | -0,461594427 | 0,482265076 |  |
| 210697_at    | ZNF257          | 0,020670649  | -0,461594427 | 0,482265076 |  |
| 217632_at    | GNL3L           | 0,020670649  | -0,461594427 | 0,482265076 |  |
| 233077_at    | NAV2-AS4        | 0,020670649  | -0,461594427 | 0,482265076 |  |
| 233912_x_at  | -               | 0,020670649  | -0,461594427 | 0,482265076 |  |
| 212720_at    | PAPOLA          | 3,734704399  | 3,252481567  | 0,482222833 |  |



|              |                 |              |              |             |  |
|--------------|-----------------|--------------|--------------|-------------|--|
| 201784_s_at  | C11orf58        | 5,666452598  | 5,184334316  | 0,482118282 |  |
| 216563_at    | ANKRD12         | 0,541261317  | 0,059218869  | 0,482042448 |  |
| 1552698_at   | TUBA3FP         | -0,67289328  | -1,154897679 | 0,482004399 |  |
| 1553281_at   | PLCXD2          | -0,67289328  | -1,154897679 | 0,482004399 |  |
| 1564369_at   | -               | -0,67289328  | -1,154897679 | 0,482004399 |  |
| 209529_at    | PPAP2C          | -0,67289328  | -1,154897679 | 0,482004399 |  |
| 234120_at    | -               | -0,67289328  | -1,154897679 | 0,482004399 |  |
| 242834_at    | -               | -0,67289328  | -1,154897679 | 0,482004399 |  |
| 216091_s_at  | BTRC            | 1,119359127  | 0,638150376  | 0,481208751 |  |
| 1555476_at   | IREB2           | -0,85085127  | -1,332017329 | 0,481166059 |  |
| 1561391_at   | STAU2-AS1       | -0,85085127  | -1,332017329 | 0,481166059 |  |
| 1561919_at   | -               | -0,85085127  | -1,332017329 | 0,481166059 |  |
| 214371_at    | TSSK2           | -0,85085127  | -1,332017329 | 0,481166059 |  |
| 216009_at    | SLC39A9         | -0,85085127  | -1,332017329 | 0,481166059 |  |
| 216480_x_at  | MLLT10          | -0,85085127  | -1,332017329 | 0,481166059 |  |
| 220231_at    | PPP1R17         | -0,85085127  | -1,332017329 | 0,481166059 |  |
| 227552_at    | 37135           | -0,85085127  | -1,332017329 | 0,481166059 |  |
| 230978_at    | LOC100505659    | -0,85085127  | -1,332017329 | 0,481166059 |  |
| 236416_at    | ARHGEF7         | -0,85085127  | -1,332017329 | 0,481166059 |  |
| 238350_at    | UBN2            | -0,85085127  | -1,332017329 | 0,481166059 |  |
| 239048_at    | -               | -0,85085127  | -1,332017329 | 0,481166059 |  |
| 239054_at    | SFMBT1          | -0,85085127  | -1,332017329 | 0,481166059 |  |
| 244835_at    | C16orf52        | -0,85085127  | -1,332017329 | 0,481166059 |  |
| 206115_at    | EGR3            | 2,623460554  | 2,14244844   | 0,481012114 |  |
| 211709_s_at  | CLEC11A         | 3,343695493  | 2,862725455  | 0,480970038 |  |
| 201083_s_at  | BCLAF1          | 3,27186005   | 2,791007185  | 0,480852865 |  |
| 235604_x_at  | ZNF493          | 1,139070151  | 0,658444279  | 0,480625872 |  |
| 222808_at    | ALG13           | 3,088871381  | 2,608344689  | 0,480526692 |  |
| 1562428_at   | LOC654780       | -0,055687482 | -0,536087151 | 0,480399669 |  |
| 208936_x_at  | LGALS8          | -0,055687482 | -0,536087151 | 0,480399669 |  |
| 216824_at    | -               | -0,055687482 | -0,536087151 | 0,480399669 |  |
| 235135_at    | TAF10           | -0,055687482 | -0,536087151 | 0,480399669 |  |
| 241601_at    | WIPF3           | -0,055687482 | -0,536087151 | 0,480399669 |  |
| 243447_at    | -               | -0,055687482 | -0,536087151 | 0,480399669 |  |
| 223675_s_at  | VEZT            | 2,410880861  | 1,930732138  | 0,480148723 |  |
| 238907_at    | ZNF780A         | 1,104397092  | 0,624460759  | 0,479936333 |  |
| 218717_s_at  | LEPREL1         | 1,04816921   | 0,568365095  | 0,479804115 |  |
| 220129_at    | CCDC169-SOHL    | -0,285837228 | -0,765504029 | 0,479666801 |  |
| 222866_s_at  | FLVCR2          | -0,285837228 | -0,765504029 | 0,479666801 |  |
| 1559651_at   | CSNK1A1P1       | -2,756478458 | -3,236070201 | 0,479591743 |  |
| 1562352_at   | -               | -2,756478458 | -3,236070201 | 0,479591743 |  |
| 1567000_at   | -               | -2,756478458 | -3,236070201 | 0,479591743 |  |
| 212395_s_at  | EMC1            | 2,59519831   | 2,115788273  | 0,479410037 |  |
| 1557103_a_at | LMTK3           | -1,308181863 | -1,787089803 | 0,47890794  |  |
| 1558011_at   | LOC100506903 /  | -1,308181863 | -1,787089803 | 0,47890794  |  |
| 1560290_at   | -               | -1,308181863 | -1,787089803 | 0,47890794  |  |
| 1565713_at   | -               | -1,308181863 | -1,787089803 | 0,47890794  |  |
| 1565859_at   | SNORA71A        | -1,308181863 | -1,787089803 | 0,47890794  |  |
| 205994_at    | ELK4            | -1,308181863 | -1,787089803 | 0,47890794  |  |
| 213173_at    | PCNX            | -1,308181863 | -1,787089803 | 0,47890794  |  |
| 214032_at    | ZAP70           | -1,308181863 | -1,787089803 | 0,47890794  |  |
| 222085_at    | FAM174B         | -1,308181863 | -1,787089803 | 0,47890794  |  |
| 229600_s_at  | CPD             | -1,308181863 | -1,787089803 | 0,47890794  |  |
| 233631_x_at  | KRTAP9-2 /// KR | -1,308181863 | -1,787089803 | 0,47890794  |  |
| 233773_at    | -               | -1,308181863 | -1,787089803 | 0,47890794  |  |
| 239511_s_at  | SRSF4           | -1,308181863 | -1,787089803 | 0,47890794  |  |

|              |                 |              |              |             |
|--------------|-----------------|--------------|--------------|-------------|
| 242737_at    | -               | -1,308181863 | -1,787089803 | 0,47890794  |
| 1553280_at   | PUS10           | 0,376672223  | -0,102100538 | 0,478772761 |
| 233451_at    | SLC52A3         | 0,376672223  | -0,102100538 | 0,478772761 |
| 1554132_a_at | FAM190B         | -0,741668563 | -1,220210588 | 0,478542025 |
| 228532_at    | C1orf162        | -0,741668563 | -1,220210588 | 0,478542025 |
| 228981_at    | TMEM169         | -0,741668563 | -1,220210588 | 0,478542025 |
| 229954_at    | CHDH            | -0,741668563 | -1,220210588 | 0,478542025 |
| 1555131_a_at | PER3            | -0,136301282 | -0,614371577 | 0,478070294 |
| 1558466_at   | UGGT2           | -0,136301282 | -0,614371577 | 0,478070294 |
| 1567457_at   | RAC1            | -0,136301282 | -0,614371577 | 0,478070294 |
| 211795_s_at  | FYB             | -0,136301282 | -0,614371577 | 0,478070294 |
| 231890_at    | -               | -0,136301282 | -0,614371577 | 0,478070294 |
| 243751_at    | CHD2            | -0,136301282 | -0,614371577 | 0,478070294 |
| 235984_at    | -               | 0,682279745  | 0,204310755  | 0,47796899  |
| 225346_at    | MTERFD3         | 1,593009234  | 1,115234684  | 0,47777455  |
| 1554774_at   | MINA            | 0,317354302  | -0,160136748 | 0,47749105  |
| 1559132_at   | TMEM80          | 0,317354302  | -0,160136748 | 0,47749105  |
| 240843_at    | -               | 0,317354302  | -0,160136748 | 0,47749105  |
| 205398_s_at  | SMAD3           | 1,567778694  | 1,090553537  | 0,477225156 |
| 202730_s_at  | MIR4680 /// PDC | 2,929639344  | 2,452428893  | 0,47721045  |
| 203760_s_at  | SLA             | -0,089689931 | -0,566887459 | 0,477197528 |
| 229329_s_at  | -               | -0,089689931 | -0,566887459 | 0,477197528 |
| 239574_at    | -               | -0,089689931 | -0,566887459 | 0,477197528 |
| 232811_x_at  | PRICKLE1        | 0,87091093   | 0,393761504  | 0,477149426 |
| 211122_s_at  | CXCL11          | 3,006764929  | 2,529740643  | 0,477024286 |
| 235253_at    | RAD1            | 1,976645579  | 1,499637023  | 0,477008556 |
| 205091_x_at  | RECQL           | 1,381753566  | 0,904843258  | 0,476910308 |
| 226656_at    | CRTAP           | 1,722769813  | 1,246149888  | 0,476619925 |
| 234677_at    | -               | 0,555999837  | 0,079428135  | 0,476571702 |
| 1556427_s_at | LRRN4CL         | -0,946847173 | -1,423348341 | 0,476501168 |
| 1561152_a_at | -               | -0,946847173 | -1,423348341 | 0,476501168 |
| 204339_s_at  | RGS4            | -0,946847173 | -1,423348341 | 0,476501168 |
| 210182_at    | CORT            | -0,946847173 | -1,423348341 | 0,476501168 |
| 211024_s_at  | NKX2-1          | -0,946847173 | -1,423348341 | 0,476501168 |
| 211455_at    | -               | -0,946847173 | -1,423348341 | 0,476501168 |
| 220267_at    | KRT24           | -0,946847173 | -1,423348341 | 0,476501168 |
| 220406_at    | TGFB2           | -0,946847173 | -1,423348341 | 0,476501168 |
| 221723_s_at  | SLC4A5          | -0,946847173 | -1,423348341 | 0,476501168 |
| 237407_at    | HS1BP3          | -0,946847173 | -1,423348341 | 0,476501168 |
| 243516_at    | -               | -0,946847173 | -1,423348341 | 0,476501168 |
| 244365_at    | -               | -0,946847173 | -1,423348341 | 0,476501168 |
| 203913_s_at  | HPGD            | 2,817903185  | 2,341749893  | 0,476153292 |
| 1569745_at   | LOC100505783    | 0,255492549  | -0,220592223 | 0,476084773 |
| 214793_at    | DUSP7           | 0,255492549  | -0,220592223 | 0,476084773 |
| 230246_at    | PLAC9           | 0,255492549  | -0,220592223 | 0,476084773 |
| 231874_at    | FAM126B         | 0,255492549  | -0,220592223 | 0,476084773 |
| 242424_at    | -               | 0,255492549  | -0,220592223 | 0,476084773 |
| 1554098_at   | SPIN3           | -0,57445847  | -1,050406615 | 0,475948145 |
| 206917_at    | GNA13           | -0,57445847  | -1,050406615 | 0,475948145 |
| 219024_at    | PLEKHA1         | -0,57445847  | -1,050406615 | 0,475948145 |
| 226819_at    | LSM11           | -0,57445847  | -1,050406615 | 0,475948145 |
| 229114_at    | GAB1            | -0,57445847  | -1,050406615 | 0,475948145 |
| 230530_at    | -               | -0,57445847  | -1,050406615 | 0,475948145 |
| 234373_x_at  | -               | -0,57445847  | -1,050406615 | 0,475948145 |
| 239715_at    | -               | -0,57445847  | -1,050406615 | 0,475948145 |
| 239879_at    | LOC284998       | -0,57445847  | -1,050406615 | 0,475948145 |

|              |                 |              |              |             |  |
|--------------|-----------------|--------------|--------------|-------------|--|
| 1555272_at   | RSPH10B /// RSP | 1,917954284  | 1,442269454  | 0,47568483  |  |
| 204533_at    | CXCL10          | 0,853119696  | 0,377530647  | 0,475589049 |  |
| 217622_at    | RHBDD3          | 0,853119696  | 0,377530647  | 0,475589049 |  |
| 222156_x_at  | CCPG1 /// DYX10 | 0,152582607  | -0,322870281 | 0,475452888 |  |
| 228219_s_at  | UPB1            | 0,152582607  | -0,322870281 | 0,475452888 |  |
| 211081_s_at  | MAP4K5          | 1,079110292  | 0,603679647  | 0,475430645 |  |
| 230205_at    | ZNF561          | 1,079110292  | 0,603679647  | 0,475430645 |  |
| 214711_at    | GATC            | 2,566371329  | 2,091116676  | 0,475254654 |  |
| 222717_at    | SDPR            | 5,069317741  | 4,594226933  | 0,475090808 |  |
| 219188_s_at  | MACROD1         | 1,292162421  | 0,817300337  | 0,474862084 |  |
| 202203_s_at  | AMFR            | 2,31665944   | 1,841838775  | 0,474820665 |  |
| 1554981_at   | C9orf11         | -2,479842156 | -2,954576755 | 0,474734599 |  |
| 1569512_at   | -               | -2,479842156 | -2,954576755 | 0,474734599 |  |
| 208193_at    | IL9             | -2,479842156 | -2,954576755 | 0,474734599 |  |
| 214621_at    | GYS2            | -2,479842156 | -2,954576755 | 0,474734599 |  |
| 222287_at    | TRDN            | -2,479842156 | -2,954576755 | 0,474734599 |  |
| 229724_at    | GABRB3          | -2,479842156 | -2,954576755 | 0,474734599 |  |
| 232233_at    | SLC22A16        | -2,479842156 | -2,954576755 | 0,474734599 |  |
| 237127_at    | -               | -2,479842156 | -2,954576755 | 0,474734599 |  |
| 204288_s_at  | SORBS2          | 0,533835206  | 0,059218869  | 0,474616338 |  |
| 212984_at    | ATF2            | 3,488057722  | 3,013449121  | 0,474608601 |  |
| 207067_s_at  | HDC             | -0,43775896  | -0,912331589 | 0,474572628 |  |
| 210214_s_at  | BMPR2           | -0,43775896  | -0,912331589 | 0,474572628 |  |
| 220698_at    | MGC4294         | -0,43775896  | -0,912331589 | 0,474572628 |  |
| 226812_at    | -               | -0,43775896  | -0,912331589 | 0,474572628 |  |
| 229968_at    | -               | -0,43775896  | -0,912331589 | 0,474572628 |  |
| 1562327_at   | -               | -1,688127507 | -2,162639771 | 0,474512265 |  |
| 203587_at    | ARL4D           | -1,688127507 | -2,162639771 | 0,474512265 |  |
| 207202_s_at  | NR1I2           | -1,688127507 | -2,162639771 | 0,474512265 |  |
| 215033_at    | TM4SF1          | -1,688127507 | -2,162639771 | 0,474512265 |  |
| 217328_at    | IL23A           | -1,688127507 | -2,162639771 | 0,474512265 |  |
| 222964_at    | -               | -1,688127507 | -2,162639771 | 0,474512265 |  |
| 229399_at    | C10orf118       | -1,688127507 | -2,162639771 | 0,474512265 |  |
| 230251_at    | LINC00473       | -1,688127507 | -2,162639771 | 0,474512265 |  |
| 231326_s_at  | LOC100506234    | -1,688127507 | -2,162639771 | 0,474512265 |  |
| 233317_at    | CD9             | -1,688127507 | -2,162639771 | 0,474512265 |  |
| 237452_at    | -               | -1,688127507 | -2,162639771 | 0,474512265 |  |
| 238200_at    | -               | -1,688127507 | -2,162639771 | 0,474512265 |  |
| 242702_at    | MMAA            | -1,688127507 | -2,162639771 | 0,474512265 |  |
| 207675_x_at  | ARTN            | -0,172274514 | -0,646746079 | 0,474471565 |  |
| 225328_at    | FBXO32          | -0,172274514 | -0,646746079 | 0,474471565 |  |
| 231964_at    | BICD1           | -0,172274514 | -0,646746079 | 0,474471565 |  |
| 1559079_at   | LINC00567       | -1,812418401 | -2,286583451 | 0,474165049 |  |
| 1559616_x_at | ZNF626          | -1,812418401 | -2,286583451 | 0,474165049 |  |
| 1562336_at   | CASC2           | -1,812418401 | -2,286583451 | 0,474165049 |  |
| 1563776_at   | LOC100507283    | -1,812418401 | -2,286583451 | 0,474165049 |  |
| 1566469_at   | -               | -1,812418401 | -2,286583451 | 0,474165049 |  |
| 1570528_at   | XYLT2           | -1,812418401 | -2,286583451 | 0,474165049 |  |
| 206039_at    | RAB33A          | -1,812418401 | -2,286583451 | 0,474165049 |  |
| 207242_s_at  | GRIK1           | -1,812418401 | -2,286583451 | 0,474165049 |  |
| 211481_at    | SLCO1A2         | -1,812418401 | -2,286583451 | 0,474165049 |  |
| 216020_at    | IFIH1           | -1,812418401 | -2,286583451 | 0,474165049 |  |
| 222142_at    | CYLD            | -1,812418401 | -2,286583451 | 0,474165049 |  |
| 230517_at    | ZNF775          | -1,812418401 | -2,286583451 | 0,474165049 |  |
| 236877_at    | -               | -1,812418401 | -2,286583451 | 0,474165049 |  |
| 238137_at    | -               | -1,812418401 | -2,286583451 | 0,474165049 |  |

|              |                 |              |              |             |  |
|--------------|-----------------|--------------|--------------|-------------|--|
| 238726_at    | -               | -1,812418401 | -2,286583451 | 0,474165049 |  |
| 240275_at    | ARMC3           | -1,812418401 | -2,286583451 | 0,474165049 |  |
| 243657_at    | -               | -1,812418401 | -2,286583451 | 0,474165049 |  |
| 218419_s_at  | TMUB2           | 1,063722698  | 0,589657387  | 0,474065311 |  |
| 220115_s_at  | CDH10           | 0,083054335  | -0,39061235  | 0,473666685 |  |
| 225978_at    | RIMKLB          | 0,767063567  | 0,293518836  | 0,473544731 |  |
| 221541_at    | CRISPLD2        | 0,480753764  | 0,007421914  | 0,47333185  |  |
| 222591_at    | STYXL1          | 0,480753764  | 0,007421914  | 0,47333185  |  |
| 211760_s_at  | VAMP4           | 1,027166904  | 0,553993624  | 0,47317328  |  |
| 1568720_at   | ZNF506          | -2,262747984 | -2,735862426 | 0,473114441 |  |
| 206408_at    | LRRTM2          | -2,262747984 | -2,735862426 | 0,473114441 |  |
| 206557_at    | ZNF702P         | -2,262747984 | -2,735862426 | 0,473114441 |  |
| 208933_s_at  | LGALS8          | -2,262747984 | -2,735862426 | 0,473114441 |  |
| 214559_at    | DRD3            | -2,262747984 | -2,735862426 | 0,473114441 |  |
| 230680_at    | SLITRK4         | -2,262747984 | -2,735862426 | 0,473114441 |  |
| 230776_at    | RNF157-AS1      | -2,262747984 | -2,735862426 | 0,473114441 |  |
| 240337_at    | RHOA            | -2,262747984 | -2,735862426 | 0,473114441 |  |
| 240581_at    | LOC644135       | -2,262747984 | -2,735862426 | 0,473114441 |  |
| 238401_at    | ENDOV /// LOC1  | 0,695652136  | 0,222599095  | 0,473053042 |  |
| 213637_at    | DDX52           | 3,231115193  | 2,758473378  | 0,472641815 |  |
| 214172_x_at  | RYK             | 1,850809354  | 1,378453643  | 0,472355711 |  |
| 230814_at    | C19orf81        | 1,143956113  | 0,67181667   | 0,472139443 |  |
| 1555733_s_at | AP1S3           | -2,667025278 | -3,138626879 | 0,471601601 |  |
| 1562381_at   | HLA-F-AS1       | -2,667025278 | -3,138626879 | 0,471601601 |  |
| 1564107_at   | -               | -2,667025278 | -3,138626879 | 0,471601601 |  |
| 1570111_at   | LINC00521       | -2,667025278 | -3,138626879 | 0,471601601 |  |
| 212999_x_at  | HLA-DQB1 /// LO | -2,667025278 | -3,138626879 | 0,471601601 |  |
| 227238_at    | MUC15           | -2,667025278 | -3,138626879 | 0,471601601 |  |
| 243799_x_at  | ANGPTL3         | -2,667025278 | -3,138626879 | 0,471601601 |  |
| 240512_x_at  | KCTD4           | -2,930741289 | -3,402185466 | 0,471444177 |  |
| 229220_x_at  | NOM1            | 4,315944589  | 3,844556416  | 0,471388174 |  |
| 1570257_x_at | -               | 0,67554678   | 0,204310755  | 0,471236025 |  |
| 204659_s_at  | GFER            | 0,67554678   | 0,204310755  | 0,471236025 |  |
| 206836_at    | SLC6A3          | 0,67554678   | 0,204310755  | 0,471236025 |  |
| 243198_at    | TEX9            | 0,67554678   | 0,204310755  | 0,471236025 |  |
| 215621_s_at  | IGHD            | 0,334552598  | -0,136643983 | 0,471196581 |  |
| 1552599_at   | PXT1            | -1,937711681 | -2,408705138 | 0,470993456 |  |
| 1553817_at   | LOC100653171 /  | -1,937711681 | -2,408705138 | 0,470993456 |  |
| 1554825_at   | -               | -1,937711681 | -2,408705138 | 0,470993456 |  |
| 1555462_at   | PPP1R1C         | -1,937711681 | -2,408705138 | 0,470993456 |  |
| 1560354_at   | -               | -1,937711681 | -2,408705138 | 0,470993456 |  |
| 1563845_at   | FAM153B /// LOC | -1,937711681 | -2,408705138 | 0,470993456 |  |
| 1565132_at   | RBMY3AP         | -1,937711681 | -2,408705138 | 0,470993456 |  |
| 1569721_at   | -               | -1,937711681 | -2,408705138 | 0,470993456 |  |
| 203708_at    | PDE4B           | -1,937711681 | -2,408705138 | 0,470993456 |  |
| 211414_at    | GLS             | -1,937711681 | -2,408705138 | 0,470993456 |  |
| 214475_x_at  | CAPN3           | -1,937711681 | -2,408705138 | 0,470993456 |  |
| 232768_at    | CCNB2           | -1,937711681 | -2,408705138 | 0,470993456 |  |
| 233331_at    | -               | -1,937711681 | -2,408705138 | 0,470993456 |  |
| 243556_at    | NGEF            | -1,937711681 | -2,408705138 | 0,470993456 |  |
| 1557567_a_at | LOC100507634    | -0,259832361 | -0,730778808 | 0,470946447 |  |
| 206738_at    | APOC2 /// APOC  | -0,259832361 | -0,730778808 | 0,470946447 |  |
| 231188_at    | ZSCAN2          | -0,259832361 | -0,730778808 | 0,470946447 |  |
| 233733_at    | -               | -0,259832361 | -0,730778808 | 0,470946447 |  |
| 206003_at    | CEP135          | 2,972842302  | 2,501934108  | 0,470908194 |  |
| 221951_at    | TMEM80          | 2,043538949  | 1,572742379  | 0,47079657  |  |

|              |               |              |              |             |  |
|--------------|---------------|--------------|--------------|-------------|--|
| 1556597_a_at | LOC284513     | 0,052199481  | -0,41858459  | 0,47078407  |  |
| 202834_at    | AGT           | 0,052199481  | -0,41858459  | 0,47078407  |  |
| 233070_at    | ZNF197        | 0,052199481  | -0,41858459  | 0,47078407  |  |
| 242855_at    | KCP           | 0,052199481  | -0,41858459  | 0,47078407  |  |
| 209938_at    | TADA2A        | 0,888485433  | 0,417770464  | 0,47071497  |  |
| 1554450_s_at | MIER3         | 1,889144008  | 1,418668082  | 0,470475925 |  |
| 222607_s_at  | DIS3          | 4,022255566  | 3,551810897  | 0,47044467  |  |
| 219661_at    | RANBP17       | 1,912238072  | 1,442269454  | 0,469968618 |  |
| 227471_at    | HACE1         | 2,084778276  | 1,614891062  | 0,469887215 |  |
| 242442_x_at  | TRMT10A       | 1,094335495  | 0,624460759  | 0,469874736 |  |
| 203830_at    | C17orf75      | 1,446464021  | 0,976641161  | 0,46982286  |  |
| 218668_s_at  | RAP2C         | 3,443176398  | 2,973511251  | 0,469665147 |  |
| 222270_at    | SMEK2         | 0,273439642  | -0,19610998  | 0,469549622 |  |
| 218372_at    | MED9          | 1,037706275  | 0,568365095  | 0,46934118  |  |
| 1555027_at   | P4HA2         | -2,311268652 | -2,780313924 | 0,469045273 |  |
| 200795_at    | SPARCL1       | -2,311268652 | -2,780313924 | 0,469045273 |  |
| 202948_at    | IL1R1         | -2,311268652 | -2,780313924 | 0,469045273 |  |
| 207516_at    | CHRN4         | -2,311268652 | -2,780313924 | 0,469045273 |  |
| 241119_at    | -             | -2,311268652 | -2,780313924 | 0,469045273 |  |
| 243563_at    | -             | -2,311268652 | -2,780313924 | 0,469045273 |  |
| 1567166_at   | -             | 0,779676066  | 0,310717132  | 0,468958934 |  |
| 226097_at    | FNDC5         | 0,30867765   | -0,160136748 | 0,468814398 |  |
| 227726_at    | RNF166        | 0,30867765   | -0,160136748 | 0,468814398 |  |
| 201294_s_at  | WSB1          | 1,224581536  | 0,755840599  | 0,468740936 |  |
| 203640_at    | MBNL2         | 4,759679153  | 4,291026333  | 0,46865282  |  |
| 218986_s_at  | DDX60         | 2,14450783   | 1,675891488  | 0,468616342 |  |
| 1569351_at   | SOBP          | -0,79540287  | -1,264005341 | 0,468602471 |  |
| 210397_at    | DEFB1         | -0,79540287  | -1,264005341 | 0,468602471 |  |
| 219638_at    | FBXO22        | -0,79540287  | -1,264005341 | 0,468602471 |  |
| 225883_at    | ATG16L2       | -0,79540287  | -1,264005341 | 0,468602471 |  |
| 229117_s_at  | JUND          | -0,79540287  | -1,264005341 | 0,468602471 |  |
| 235530_at    | -             | -0,79540287  | -1,264005341 | 0,468602471 |  |
| 239578_at    | -             | -0,79540287  | -1,264005341 | 0,468602471 |  |
| 239915_at    | HOXA-AS3      | -0,79540287  | -1,264005341 | 0,468602471 |  |
| 242378_at    | MYADML2       | -0,79540287  | -1,264005341 | 0,468602471 |  |
| 205264_at    | CD3EAP        | 3,479385765  | 3,010820719  | 0,468565046 |  |
| 203005_at    | LTBR          | 2,333865983  | 1,865308541  | 0,468557441 |  |
| 207688_s_at  | -             | 3,03990821   | 2,571362843  | 0,468545366 |  |
| 237503_at    | SLC5A8        | -0,022466681 | -0,490927335 | 0,468460654 |  |
| 239435_x_at  | SHROOM1       | -0,022466681 | -0,490927335 | 0,468460654 |  |
| 244477_at    | -             | -0,022466681 | -0,490927335 | 0,468460654 |  |
| 203645_s_at  | CD163         | -1,026571149 | -1,494668682 | 0,468097533 |  |
| 205623_at    | ALDH3A1       | -1,026571149 | -1,494668682 | 0,468097533 |  |
| 207736_s_at  | TNP2          | -1,026571149 | -1,494668682 | 0,468097533 |  |
| 209925_at    | OCLN          | -1,026571149 | -1,494668682 | 0,468097533 |  |
| 211156_at    | CDKN2A        | -1,026571149 | -1,494668682 | 0,468097533 |  |
| 214064_at    | TF            | -1,026571149 | -1,494668682 | 0,468097533 |  |
| 215154_at    | ULK2          | -1,026571149 | -1,494668682 | 0,468097533 |  |
| 224041_at    | TTY6 /// TTY6 | -1,026571149 | -1,494668682 | 0,468097533 |  |
| 229150_at    | -             | -1,026571149 | -1,494668682 | 0,468097533 |  |
| 231706_s_at  | EVX1          | -1,026571149 | -1,494668682 | 0,468097533 |  |
| 235001_at    | DNAJC21       | -1,026571149 | -1,494668682 | 0,468097533 |  |
| 236242_at    | -             | -1,026571149 | -1,494668682 | 0,468097533 |  |
| 236578_at    | -             | -1,026571149 | -1,494668682 | 0,468097533 |  |
| 242071_x_at  | ITGA8         | -1,026571149 | -1,494668682 | 0,468097533 |  |
| 222726_s_at  | EXOC5         | 2,834621043  | 2,366632651  | 0,467988392 |  |

|              |                |              |              |             |  |
|--------------|----------------|--------------|--------------|-------------|--|
| 236667_at    | TMEM120B       | 1,191926657  | 0,724100169  | 0,467826487 |  |
| 206451_at    | TBCCD1         | 2,764969948  | 2,297144887  | 0,467825061 |  |
| 242923_at    | ZNF678         | 0,496120222  | 0,028364014  | 0,467756208 |  |
| 1552272_a_at | PRR22          | 0,209623097  | -0,258114234 | 0,467737331 |  |
| 206838_at    | TBX19          | 0,209623097  | -0,258114234 | 0,467737331 |  |
| 213345_at    | NFATC4         | 0,209623097  | -0,258114234 | 0,467737331 |  |
| 218666_s_at  | STX17          | 0,735041319  | 0,26733076   | 0,46771056  |  |
| 232397_at    | LOC100507039   | 3,643632572  | 3,175947691  | 0,467684881 |  |
| 202996_at    | POLD4          | 1,496984567  | 1,029536893  | 0,467447674 |  |
| 1554485_s_at | TMEM37         | 0,760715727  | 0,293518836  | 0,467196891 |  |
| 206414_s_at  | ASAP2          | 0,760715727  | 0,293518836  | 0,467196891 |  |
| 1553088_a_at | BCL2L11        | 1,748661581  | 1,281471383  | 0,467190198 |  |
| 1554916_a_at | JRK            | -0,543051993 | -1,010192375 | 0,467140382 |  |
| 214622_at    | CYP21A2        | -0,543051993 | -1,010192375 | 0,467140382 |  |
| 220068_at    | VPREB3         | -0,543051993 | -1,010192375 | 0,467140382 |  |
| 230537_at    | -              | -0,543051993 | -1,010192375 | 0,467140382 |  |
| 234487_at    | -              | -0,543051993 | -1,010192375 | 0,467140382 |  |
| 236232_at    | -              | -0,543051993 | -1,010192375 | 0,467140382 |  |
| 241615_x_at  | -              | -0,543051993 | -1,010192375 | 0,467140382 |  |
| 242888_at    | PRRT3-AS1      | -0,543051993 | -1,010192375 | 0,467140382 |  |
| 222424_s_at  | NUCKS1         | 2,693452197  | 2,226407528  | 0,467044669 |  |
| 1553141_at   | LACC1          | -1,196375121 | -1,663414495 | 0,467039373 |  |
| 1557768_at   | -              | -1,196375121 | -1,663414495 | 0,467039373 |  |
| 1569310_at   | IRGQ           | -1,196375121 | -1,663414495 | 0,467039373 |  |
| 220644_at    | -              | -1,196375121 | -1,663414495 | 0,467039373 |  |
| 227691_at    | AKAP8L         | -1,196375121 | -1,663414495 | 0,467039373 |  |
| 229659_s_at  | -              | -1,196375121 | -1,663414495 | 0,467039373 |  |
| 233348_at    | -              | -1,196375121 | -1,663414495 | 0,467039373 |  |
| 233788_at    | -              | -1,196375121 | -1,663414495 | 0,467039373 |  |
| 237152_at    | PCDP1          | -1,196375121 | -1,663414495 | 0,467039373 |  |
| 242665_at    | FMNL2          | -1,196375121 | -1,663414495 | 0,467039373 |  |
| 205132_at    | ACTC1          | 0,246434561  | -0,220592223 | 0,467026784 |  |
| 210924_at    | OLFM1          | 0,246434561  | -0,220592223 | 0,467026784 |  |
| 218703_at    | SEC22A         | 0,246434561  | -0,220592223 | 0,467026784 |  |
| 229204_at    | -              | 1,331241794  | 0,864649967  | 0,466591827 |  |
| 203106_s_at  | VPS41          | -0,299034815 | -0,765504029 | 0,466469214 |  |
| 216138_at    | -              | -0,299034815 | -0,765504029 | 0,466469214 |  |
| 218451_at    | CDCP1          | -0,299034815 | -0,765504029 | 0,466469214 |  |
| 237595_at    | -              | -0,299034815 | -0,765504029 | 0,466469214 |  |
| 1552893_at   | CAMK2N2        | -0,352951799 | -0,819238336 | 0,466286538 |  |
| 1556232_at   | KIF6           | -0,352951799 | -0,819238336 | 0,466286538 |  |
| 1569316_at   | TRIM24         | -0,352951799 | -0,819238336 | 0,466286538 |  |
| 222914_s_at  | TMEM121        | -0,352951799 | -0,819238336 | 0,466286538 |  |
| 240920_at    | -              | -0,352951799 | -0,819238336 | 0,466286538 |  |
| 220257_x_at  | NXF2 /// NXF2B | -0,148196756 | -0,614371577 | 0,46617482  |  |
| 234986_at    | GCLM           | 0,715481152  | 0,249604176  | 0,465876976 |  |
| 224801_at    | NDFIP2         | 2,114952142  | 1,64909809   | 0,465854052 |  |
| 202412_s_at  | USP1           | 2,325288363  | 1,859476797  | 0,465811566 |  |
| 1554994_at   | RAG1           | -2,712026959 | -3,177802286 | 0,465775327 |  |
| 1556888_at   | -              | -2,712026959 | -3,177802286 | 0,465775327 |  |
| 1561679_at   | -              | -2,712026959 | -3,177802286 | 0,465775327 |  |
| 1561962_at   | -              | -2,712026959 | -3,177802286 | 0,465775327 |  |
| 1569254_s_at | INTS4          | -2,712026959 | -3,177802286 | 0,465775327 |  |
| 230276_at    | FAM49A         | -2,712026959 | -3,177802286 | 0,465775327 |  |
| 232786_at    | COG6           | -2,712026959 | -3,177802286 | 0,465775327 |  |
| 235587_at    | LOC202781      | 2,027765132  | 1,562009954  | 0,465755178 |  |

|              |                |              |              |             |  |
|--------------|----------------|--------------|--------------|-------------|--|
| 219150_s_at  | ADAP1          | 0,859074518  | 0,393761504  | 0,465313014 |  |
| 215767_at    | ZNF804A        | 0,181384709  | -0,283667828 | 0,465052537 |  |
| 220442_at    | GALNT4 /// POC | 0,181384709  | -0,283667828 | 0,465052537 |  |
| 227209_at    | CNTN1          | 0,181384709  | -0,283667828 | 0,465052537 |  |
| 221846_s_at  | CASKIN2        | 0,641402394  | 0,176436073  | 0,464966321 |  |
| 216583_x_at  | -              | 1,089278259  | 0,624460759  | 0,4648175   |  |
| 1554608_at   | TGOLN2         | 0,384950573  | -0,079522948 | 0,464473522 |  |
| 241964_at    | ZNF865         | 0,384950573  | -0,079522948 | 0,464473522 |  |
| 213906_at    | MYBL1          | 1,201332287  | 0,73688026   | 0,464452026 |  |
| 219502_at    | NEIL3          | 2,001086023  | 1,536652708  | 0,464433315 |  |
| 215054_at    | EPOR           | 3,801937331  | 3,337798009  | 0,464139322 |  |
| 217837_s_at  | CHMP3 /// RNF1 | 3,837056482  | 3,373018423  | 0,464038059 |  |
| 223536_at    | PSD2           | 0,417596971  | -0,046302147 | 0,463899117 |  |
| 209006_s_at  | C1orf63        | 2,470441349  | 2,006570641  | 0,463870708 |  |
| 209850_s_at  | CDC42EP2       | 1,874520207  | 1,410714371  | 0,463805835 |  |
| 221882_s_at  | TMEM8A         | 2,238870125  | 1,775255987  | 0,463614137 |  |
| 229205_at    | LOC100507372   | 0,841135803  | 0,377530647  | 0,463605156 |  |
| 213241_at    | PLXNC1         | 0,072842263  | -0,39061235  | 0,463454613 |  |
| 231567_s_at  | CCDC62         | 0,072842263  | -0,39061235  | 0,463454613 |  |
| 235819_at    | BTF3L4         | 0,072842263  | -0,39061235  | 0,463454613 |  |
| 237977_at    | -              | 0,072842263  | -0,39061235  | 0,463454613 |  |
| 228966_at    | PANK2          | 0,592200562  | 0,128747141  | 0,463453421 |  |
| 217027_x_at  | -              | 1,951783949  | 1,488344553  | 0,463439396 |  |
| 209464_at    | AURKB          | 2,783874823  | 2,320681318  | 0,463193505 |  |
| 1570070_at   | C20orf160      | 1,593009234  | 1,129843209  | 0,463166025 |  |
| 1552459_a_at | MBD3L1         | -1,399512875 | -1,862647763 | 0,463134887 |  |
| 1552948_at   | CCDC27         | -1,399512875 | -1,862647763 | 0,463134887 |  |
| 213961_s_at  | -              | -1,399512875 | -1,862647763 | 0,463134887 |  |
| 216437_at    | -              | -1,399512875 | -1,862647763 | 0,463134887 |  |
| 217638_at    | -              | -1,399512875 | -1,862647763 | 0,463134887 |  |
| 221088_s_at  | PPP1R9A        | -1,399512875 | -1,862647763 | 0,463134887 |  |
| 229183_at    | KCTD1          | -1,399512875 | -1,862647763 | 0,463134887 |  |
| 230575_at    | MSRB2          | -1,399512875 | -1,862647763 | 0,463134887 |  |
| 239627_at    | -              | -1,399512875 | -1,862647763 | 0,463134887 |  |
| 239634_at    | -              | -1,399512875 | -1,862647763 | 0,463134887 |  |
| 239834_at    | -              | -1,399512875 | -1,862647763 | 0,463134887 |  |
| 243980_at    | ZNF594         | -1,399512875 | -1,862647763 | 0,463134887 |  |
| 200931_s_at  | VCL            | 5,498032951  | 5,035495453  | 0,462537498 |  |
| 223700_at    | MND1           | 3,310399576  | 2,848075314  | 0,462324262 |  |
| 233993_at    | MUC3           | 0,798390451  | 0,336136178  | 0,462254273 |  |
| 1553556_at   | TAS2R40        | -2,384869671 | -2,847001814 | 0,462132143 |  |
| 1553708_at   | LINC00525      | -2,384869671 | -2,847001814 | 0,462132143 |  |
| 1560790_at   | GOLGA6L2       | -2,384869671 | -2,847001814 | 0,462132143 |  |
| 1561642_at   | -              | -2,384869671 | -2,847001814 | 0,462132143 |  |
| 1565424_at   | LINC00529      | -2,384869671 | -2,847001814 | 0,462132143 |  |
| 1565740_at   | -              | -2,384869671 | -2,847001814 | 0,462132143 |  |
| 211480_s_at  | SLCO1A2        | -2,384869671 | -2,847001814 | 0,462132143 |  |
| 222326_at    | -              | -2,384869671 | -2,847001814 | 0,462132143 |  |
| 230866_at    | CYSLTR1        | -2,384869671 | -2,847001814 | 0,462132143 |  |
| 234493_at    | LOC116437      | -2,384869671 | -2,847001814 | 0,462132143 |  |
| 236095_at    | NTRK2          | -2,384869671 | -2,847001814 | 0,462132143 |  |
| 239716_at    | -              | -2,384869671 | -2,847001814 | 0,462132143 |  |
| 243345_at    | RNF14          | -2,384869671 | -2,847001814 | 0,462132143 |  |
| 204057_at    | IRF8           | 0,359971644  | -0,102100538 | 0,462072182 |  |
| 229879_at    | -              | 0,541261317  | 0,079428135  | 0,461833181 |  |
| 243840_at    | CLSPN          | 1,880387527  | 1,418668082  | 0,461719445 |  |

|              |                 |              |              |             |  |
|--------------|-----------------|--------------|--------------|-------------|--|
| 1557300_s_at | -               | 0,95671774   | 0,495031851  | 0,461685889 |  |
| 213440_at    | RAB1A           | 2,446911392  | 1,98530622   | 0,461605172 |  |
| 219111_s_at  | DDX54           | 1,638726528  | 1,177496821  | 0,461229707 |  |
| 218409_s_at  | DNAJC1          | 2,632180155  | 2,170981159  | 0,461198996 |  |
| 223520_s_at  | KIF13A          | -0,394749123 | -0,855751026 | 0,461001903 |  |
| 228508_at    | MAML3           | -0,394749123 | -0,855751026 | 0,461001903 |  |
| 228787_s_at  | BCAS4           | -0,394749123 | -0,855751026 | 0,461001903 |  |
| 230799_at    | LOC100134259    | -0,394749123 | -0,855751026 | 0,461001903 |  |
| 240723_at    | -               | -0,394749123 | -0,855751026 | 0,461001903 |  |
| 243671_at    | -               | -0,394749123 | -0,855751026 | 0,461001903 |  |
| 222097_at    | -               | -0,00073712  | -0,461594427 | 0,460857306 |  |
| 1555259_at   | ZAK             | -0,759588698 | -1,220210588 | 0,46062189  |  |
| 232238_at    | ASPM            | -0,759588698 | -1,220210588 | 0,46062189  |  |
| 241889_at    | NFKBID          | -0,759588698 | -1,220210588 | 0,46062189  |  |
| 244336_at    | -               | -0,759588698 | -1,220210588 | 0,46062189  |  |
| 234971_x_at  | PLCD3           | 1,247462054  | 0,786897721  | 0,460564332 |  |
| 225732_at    | KLHDC5          | 2,817903185  | 2,357351836  | 0,460551349 |  |
| 231792_at    | MYLK2           | 0,917308734  | 0,456918297  | 0,460390437 |  |
| 209451_at    | TANK            | 2,774453351  | 2,314300277  | 0,460153074 |  |
| 223489_x_at  | EXOSC3          | 2,879254447  | 2,419116683  | 0,460137764 |  |
| 224725_at    | MIB1            | 2,458724341  | 1,998633167  | 0,460091173 |  |
| 235033_at    | NPEPL1          | 1,063722698  | 0,603679647  | 0,460043051 |  |
| 204598_at    | UBOX5           | 1,473887017  | 1,013870809  | 0,460016208 |  |
| 222403_at    | MTCH2           | 2,325288363  | 1,865308541  | 0,459979822 |  |
| 216038_x_at  | DAXX            | 2,750626925  | 2,290658654  | 0,45996827  |  |
| 226181_at    | TUBE1           | 2,822481847  | 2,362515214  | 0,459966633 |  |
| 1553527_at   | NLRP9           | -0,59053611  | -1,050406615 | 0,459870505 |  |
| 1558400_x_at | ANKRD24         | -0,59053611  | -1,050406615 | 0,459870505 |  |
| 209768_s_at  | GP1BB /// SEPT5 | -0,59053611  | -1,050406615 | 0,459870505 |  |
| 214607_at    | PAK3            | -0,59053611  | -1,050406615 | 0,459870505 |  |
| 221614_s_at  | RPH3AL          | -0,59053611  | -1,050406615 | 0,459870505 |  |
| 229040_at    | LOC100505746    | -0,59053611  | -1,050406615 | 0,459870505 |  |
| 234712_at    | LINC00470       | -0,59053611  | -1,050406615 | 0,459870505 |  |
| 235870_at    | HS2ST1 /// LOC3 | -0,59053611  | -1,050406615 | 0,459870505 |  |
| 238094_at    | -               | -0,59053611  | -1,050406615 | 0,459870505 |  |
| 241846_at    | -               | -0,59053611  | -1,050406615 | 0,459870505 |  |
| 242266_x_at  | -               | -0,59053611  | -1,050406615 | 0,459870505 |  |
| 242398_x_at  | -               | -0,59053611  | -1,050406615 | 0,459870505 |  |
| 225410_at    | COA5            | 2,525769574  | 2,066015817  | 0,459753757 |  |
| 1552309_a_at | NEXN            | 0,682279745  | 0,222599095  | 0,459680651 |  |
| 206590_x_at  | DRD2            | 0,682279745  | 0,222599095  | 0,459680651 |  |
| 231505_s_at  | SFXN4           | 0,682279745  | 0,222599095  | 0,459680651 |  |
| 244324_at    | C18orf54        | 2,014487247  | 1,55481039   | 0,459676857 |  |
| 214976_at    | RPL13 /// SNORD | 0,518867317  | 0,059218869  | 0,459648448 |  |
| 227582_at    | KLHDC9          | 0,518867317  | 0,059218869  | 0,459648448 |  |
| 221893_s_at  | ADCK2           | 2,084778276  | 1,6252386    | 0,459539676 |  |
| 220553_s_at  | PRPF39          | 3,475514766  | 3,016072743  | 0,459442022 |  |
| 207526_s_at  | IL1RL1          | 2,05655332   | 1,59747851   | 0,45907481  |  |
| 212105_s_at  | DHX9            | 2,549899391  | 2,091116676  | 0,458782715 |  |
| 225362_at    | FAM122B         | 2,048758794  | 1,590454215  | 0,458304579 |  |
| 234997_x_at  | -               | 3,117719377  | 2,659583735  | 0,458135641 |  |
| 209772_s_at  | CD24            | -0,221656139 | -0,679763839 | 0,458107701 |  |
| 215841_at    | GUCA1B          | -0,221656139 | -0,679763839 | 0,458107701 |  |
| 224965_at    | GNG2            | 0,810733188  | 0,352836757  | 0,45789643  |  |
| 206657_s_at  | MYOD1           | -0,078265071 | -0,536087151 | 0,457822079 |  |
| 213568_at    | OSR2            | -0,078265071 | -0,536087151 | 0,457822079 |  |



|              |                |              |              |             |  |
|--------------|----------------|--------------|--------------|-------------|--|
| 215186_at    | TBC1D30        | -0,078265071 | -0,536087151 | 0,457822079 |  |
| 229616_s_at  | GRAMD2         | -0,078265071 | -0,536087151 | 0,457822079 |  |
| 218485_s_at  | SLC35C1        | 0,661985843  | 0,204310755  | 0,457675087 |  |
| 229700_at    | ZNF738         | 2,846658948  | 2,389070873  | 0,457588074 |  |
| 1560325_at   | -              | -2,43257096  | -2,89013181  | 0,45756085  |  |
| 1561590_a_at | LOC415056      | -2,43257096  | -2,89013181  | 0,45756085  |  |
| 1561627_at   | -              | -2,43257096  | -2,89013181  | 0,45756085  |  |
| 1561951_at   | SLC5A12        | -2,43257096  | -2,89013181  | 0,45756085  |  |
| 1562811_at   | -              | -2,43257096  | -2,89013181  | 0,45756085  |  |
| 1566698_at   | -              | -2,43257096  | -2,89013181  | 0,45756085  |  |
| 224833_at    | ETS1           | -2,43257096  | -2,89013181  | 0,45756085  |  |
| 236797_at    | -              | -2,43257096  | -2,89013181  | 0,45756085  |  |
| 244820_at    | -              | -2,43257096  | -2,89013181  | 0,45756085  |  |
| 218511_s_at  | PNPO           | 2,814842651  | 2,357351836  | 0,457490814 |  |
| 1556704_s_at | LOC100133920 / | -0,033456564 | -0,490927335 | 0,457470771 |  |
| 1560204_at   | NT5DC4         | -0,033456564 | -0,490927335 | 0,457470771 |  |
| 240943_at    | -              | -0,033456564 | -0,490927335 | 0,457470771 |  |
| 211756_at    | PTHLH          | 2,2992452    | 1,841838775  | 0,457406426 |  |
| 228700_at    | CXorf38        | 2,2992452    | 1,841838775  | 0,457406426 |  |
| 224797_at    | ARRDC3         | 3,41414682   | 2,957221307  | 0,456925513 |  |
| 1553919_at   | C9orf62        | -0,655928373 | -1,112851844 | 0,456923471 |  |
| 1554783_s_at | ARHGEF2        | -0,655928373 | -1,112851844 | 0,456923471 |  |
| 1556163_a_at | IGSF3          | -0,655928373 | -1,112851844 | 0,456923471 |  |
| 1556667_at   | FONG           | -0,655928373 | -1,112851844 | 0,456923471 |  |
| 1556685_at   | -              | -0,655928373 | -1,112851844 | 0,456923471 |  |
| 1564052_at   | TREML4         | -0,655928373 | -1,112851844 | 0,456923471 |  |
| 214600_at    | TEAD1          | -0,655928373 | -1,112851844 | 0,456923471 |  |
| 214851_at    | HNF4A          | -0,655928373 | -1,112851844 | 0,456923471 |  |
| 217171_at    | SMPD1          | -0,655928373 | -1,112851844 | 0,456923471 |  |
| 220057_at    | XAGE1A /// XAG | -0,655928373 | -1,112851844 | 0,456923471 |  |
| 238688_at    | TPM1           | -0,655928373 | -1,112851844 | 0,456923471 |  |
| 242459_at    | -              | -0,655928373 | -1,112851844 | 0,456923471 |  |
| 235295_at    | -              | 1,406361373  | 0,949447784  | 0,456913589 |  |
| 222490_at    | POLR3E         | 1,62481334   | 1,16809119   | 0,45672215  |  |
| 213993_at    | SPON1          | -2,779459409 | -3,236070201 | 0,456610792 |  |
| 240160_x_at  | -              | -2,779459409 | -3,236070201 | 0,456610792 |  |
| 1566471_at   | -              | 1,814495998  | 1,3579181    | 0,456577898 |  |
| 213418_at    | HSPA6          | 1,982112682  | 1,525647381  | 0,456465302 |  |
| 1559438_at   | C21orf58       | 0,767063567  | 0,310717132  | 0,456346435 |  |
| 1560767_at   | HCG22          | 0,767063567  | 0,310717132  | 0,456346435 |  |
| 227559_at    | NDUFAF4        | 2,26825514   | 1,811954245  | 0,456300896 |  |
| 221141_x_at  | EPN1           | 0,376672223  | -0,079522948 | 0,456195172 |  |
| 233271_at    | -              | 0,376672223  | -0,079522948 | 0,456195172 |  |
| 208260_at    | AVPR1B         | 0,792179257  | 0,336136178  | 0,456043079 |  |
| 203427_at    | ASF1A          | 3,413135307  | 2,957221307  | 0,455914    |  |
| 222488_s_at  | DCTN4          | 3,986661073  | 3,530865925  | 0,455795148 |  |
| 1554941_at   | KLHL14         | -2,64318869  | -3,098858316 | 0,455669627 |  |
| 1561236_at   | -              | -2,64318869  | -3,098858316 | 0,455669627 |  |
| 1562645_at   | LOC401176      | -2,64318869  | -3,098858316 | 0,455669627 |  |
| 207246_at    | ZFY            | -2,64318869  | -3,098858316 | 0,455669627 |  |
| 207852_at    | CXCL5          | -2,64318869  | -3,098858316 | 0,455669627 |  |
| 228706_s_at  | CLDN23         | -2,64318869  | -3,098858316 | 0,455669627 |  |
| 232514_at    | KIF27          | -2,64318869  | -3,098858316 | 0,455669627 |  |
| 244147_at    | -              | -2,64318869  | -3,098858316 | 0,455669627 |  |
| 39248_at     | AQP3           | 5,596442834  | 5,140821732  | 0,455621103 |  |
| 202221_s_at  | EP300          | 2,38635068   | 1,930732138  | 0,455618542 |  |

|              |                 |              |              |             |  |
|--------------|-----------------|--------------|--------------|-------------|--|
| 203283_s_at  | HS2ST1 /// LOC3 | 3,497632487  | 3,042049843  | 0,455582643 |  |
| 1553928_at   | ELMOD2          | 1,897847661  | 1,442269454  | 0,455578207 |  |
| 1555009_a_at | SYNJ2           | 0,171847695  | -0,283667828 | 0,455515523 |  |
| 207277_at    | CD209           | 0,171847695  | -0,283667828 | 0,455515523 |  |
| 217596_at    | UPF3A           | 0,171847695  | -0,283667828 | 0,455515523 |  |
| 229397_s_at  | ARHGAP35        | 0,171847695  | -0,283667828 | 0,455515523 |  |
| 201363_s_at  | IVNS1ABP        | 2,776027875  | 2,320681318  | 0,455346557 |  |
| 213835_x_at  | GTPBP3          | 3,450096885  | 2,994948944  | 0,45514794  |  |
| 230031_at    | HSPA5           | 1,758252436  | 1,303116084  | 0,455136352 |  |
| 1316_at      | THRA            | 0,015503229  | -0,439564623 | 0,455067852 |  |
| 1557532_at   | -               | 0,888485433  | 0,433557298  | 0,454928135 |  |
| 224549_x_at  | -               | 0,888485433  | 0,433557298  | 0,454928135 |  |
| 230339_at    | -               | 0,888485433  | 0,433557298  | 0,454928135 |  |
| 231719_at    | TOR1AIP2        | 0,888485433  | 0,433557298  | 0,454928135 |  |
| 213168_at    | SP3             | 4,431847465  | 3,977034308  | 0,454813157 |  |
| 37802_r_at   | FAM63B          | -2,425712529 | -2,880484503 | 0,454771973 |  |
| 229746_x_at  | LOC100505876    | 2,466546243  | 2,011838132  | 0,454708111 |  |
| 204843_s_at  | PRKAR2A         | 0,911589958  | 0,456918297  | 0,454671661 |  |
| 201025_at    | EIF5B           | 3,579258128  | 3,124599694  | 0,454658433 |  |
| 226990_at    | CAPRIN1         | 3,869867201  | 3,415371412  | 0,454495789 |  |
| 1558692_at   | C1orf85         | 0,533835206  | 0,079428135  | 0,454407071 |  |
| 209818_s_at  | HABP4           | 0,533835206  | 0,079428135  | 0,454407071 |  |
| 1552803_a_at | STMN1           | -2,236765673 | -2,690860744 | 0,454095071 |  |
| 1560429_at   | -               | -2,236765673 | -2,690860744 | 0,454095071 |  |
| 1569076_a_at | ZNF836          | -2,236765673 | -2,690860744 | 0,454095071 |  |
| 204677_at    | CDH5            | -2,236765673 | -2,690860744 | 0,454095071 |  |
| 230195_at    | LOC100131138    | -2,236765673 | -2,690860744 | 0,454095071 |  |
| 233760_at    | UTP11L          | -2,236765673 | -2,690860744 | 0,454095071 |  |
| 234348_at    | -               | -2,236765673 | -2,690860744 | 0,454095071 |  |
| 237745_at    | TSC22D1-AS1     | -2,236765673 | -2,690860744 | 0,454095071 |  |
| 238306_at    | -               | -2,236765673 | -2,690860744 | 0,454095071 |  |
| 204756_at    | MAP2K5          | 1,414471577  | 0,960386719  | 0,454084858 |  |
| 221150_at    | MEPE            | -0,112808516 | -0,566887459 | 0,454078943 |  |
| 236574_at    | -               | -0,112808516 | -0,566887459 | 0,454078943 |  |
| 238795_at    | FAM208B         | -0,112808516 | -0,566887459 | 0,454078943 |  |
| 242885_at    | -               | -0,112808516 | -0,566887459 | 0,454078943 |  |
| 220682_s_at  | -               | 0,317354302  | -0,136643983 | 0,453998285 |  |
| 208653_s_at  | CD164           | 4,916735717  | 4,462889331  | 0,453846387 |  |
| 220849_at    | LOC79999        | -0,496991414 | -0,950686014 | 0,453694601 |  |
| 222842_at    | EIF2C4          | -0,496991414 | -0,950686014 | 0,453694601 |  |
| 228132_at    | ABLIM2          | -0,496991414 | -0,950686014 | 0,453694601 |  |
| 228735_s_at  | PANK2           | -0,496991414 | -0,950686014 | 0,453694601 |  |
| 229424_s_at  | ARHGAP27        | -0,496991414 | -0,950686014 | 0,453694601 |  |
| 234450_at    | PROKR2          | -0,496991414 | -0,950686014 | 0,453694601 |  |
| 243633_at    | -               | -0,496991414 | -0,950686014 | 0,453694601 |  |
| 214829_at    | AASS            | 0,351548291  | -0,102100538 | 0,453648829 |  |
| 229250_at    | TPCN2           | 0,351548291  | -0,102100538 | 0,453648829 |  |
| 235202_x_at  | IKBIP           | 1,177702228  | 0,724100169  | 0,453602058 |  |
| 233068_at    | -               | 1,021868205  | 0,568365095  | 0,45350311  |  |
| 1561361_at   | ZNF660          | -1,2845686   | -1,738067356 | 0,453498756 |  |
| 206017_at    | KIAA0319        | -1,2845686   | -1,738067356 | 0,453498756 |  |
| 206759_at    | FCER2           | -1,2845686   | -1,738067356 | 0,453498756 |  |
| 207138_at    | PHF2            | -1,2845686   | -1,738067356 | 0,453498756 |  |
| 207567_at    | SLC13A2         | -1,2845686   | -1,738067356 | 0,453498756 |  |
| 208593_x_at  | CRHR1           | -1,2845686   | -1,738067356 | 0,453498756 |  |
| 220774_at    | DYM             | -1,2845686   | -1,738067356 | 0,453498756 |  |

|             |                 |              |              |             |  |
|-------------|-----------------|--------------|--------------|-------------|--|
| 227387_at   | NSMCE4A         | -1,2845686   | -1,738067356 | 0,453498756 |  |
| 229745_x_at | DACT3           | -1,2845686   | -1,738067356 | 0,453498756 |  |
| 231826_at   | RALGAPA2        | -1,2845686   | -1,738067356 | 0,453498756 |  |
| 232024_at   | GIMAP2          | -1,2845686   | -1,738067356 | 0,453498756 |  |
| 232409_x_at | FBXL16          | -1,2845686   | -1,738067356 | 0,453498756 |  |
| 240021_at   | -               | -1,2845686   | -1,738067356 | 0,453498756 |  |
| 240903_at   | -               | -1,2845686   | -1,738067356 | 0,453498756 |  |
| 243754_at   | -               | -1,2845686   | -1,738067356 | 0,453498756 |  |
| 214121_x_at | PDLIM7          | 1,493160564  | 1,039887232  | 0,453273333 |  |
| 221604_s_at | PEX16           | 1,621313976  | 1,16809119   | 0,453222786 |  |
| 228530_at   | MZT1            | 0,87091093   | 0,417770464  | 0,453140466 |  |
| 228497_at   | SLC22A15        | 0,67554678   | 0,222599095  | 0,452947685 |  |
| 1553914_at  | MGC34800        | -1,089016378 | -1,541908042 | 0,452891664 |  |
| 1559567_at  | PRDM11          | -1,089016378 | -1,541908042 | 0,452891664 |  |
| 1568849_at  | LINC00165       | -1,089016378 | -1,541908042 | 0,452891664 |  |
| 216280_s_at | DICER1          | -1,089016378 | -1,541908042 | 0,452891664 |  |
| 222031_at   | LOC100506453 /  | -1,089016378 | -1,541908042 | 0,452891664 |  |
| 226645_at   | KLF2            | -1,089016378 | -1,541908042 | 0,452891664 |  |
| 233053_at   | -               | -1,089016378 | -1,541908042 | 0,452891664 |  |
| 234223_at   | -               | -1,089016378 | -1,541908042 | 0,452891664 |  |
| 234460_at   | Ndufaf4         | -1,089016378 | -1,541908042 | 0,452891664 |  |
| 237726_at   | -               | -1,089016378 | -1,541908042 | 0,452891664 |  |
| 205263_at   | BCL10           | 3,479385765  | 3,026519779  | 0,452865985 |  |
| 219919_s_at | SSH3            | 0,103263601  | -0,34958478  | 0,452848382 |  |
| 220070_at   | KDM8            | 0,103263601  | -0,34958478  | 0,452848382 |  |
| 1552811_at  | WFIKK1          | 0,702292136  | 0,249604176  | 0,45268796  |  |
| 1560081_at  | LOC100505648    | -0,366776884 | -0,819238336 | 0,452461452 |  |
| 201615_x_at | CALD1           | -0,366776884 | -0,819238336 | 0,452461452 |  |
| 205192_at   | MAP3K14         | -0,366776884 | -0,819238336 | 0,452461452 |  |
| 208372_s_at | LIMK1           | -0,366776884 | -0,819238336 | 0,452461452 |  |
| 224355_s_at | MS4A8B          | -0,366776884 | -0,819238336 | 0,452461452 |  |
| 244011_at   | PPM1K           | -0,366776884 | -0,819238336 | 0,452461452 |  |
| 204095_s_at | ELL             | 0,480753764  | 0,028364014  | 0,452389749 |  |
| 222335_at   | -               | 1,940595304  | 1,488344553  | 0,452250751 |  |
| 225680_at   | LRWD1 /// MIR44 | 2,227406889  | 1,775255987  | 0,452150902 |  |
| 238535_at   | CEP152          | 0,984222186  | 0,532164371  | 0,452057815 |  |
| 209553_at   | LOC100505729 /  | 1,767779954  | 1,315948728  | 0,451831226 |  |
| 226686_at   | CISD2           | 3,340506684  | 2,888726553  | 0,451780131 |  |
| 218444_at   | ALG12           | 0,255492549  | -0,19610998  | 0,451602529 |  |
| 225509_at   | SAP30L          | 1,542099044  | 1,090553537  | 0,451545506 |  |
| 227184_at   | PTAFR           | 0,82905153   | 0,377530647  | 0,451520884 |  |
| 201319_at   | MYL12A          | 5,666452598  | 5,215058591  | 0,451394007 |  |
| 213747_at   | -               | 0,291166226  | -0,160136748 | 0,451302974 |  |
| 229914_at   | FLJ38717        | 0,291166226  | -0,160136748 | 0,451302974 |  |
| 232540_x_at | -               | 0,291166226  | -0,160136748 | 0,451302974 |  |
| 239196_at   | ANKRD22         | 0,291166226  | -0,160136748 | 0,451302974 |  |
| 218331_s_at | FAM208B         | 4,468825568  | 4,017530898  | 0,45129467  |  |
| 225058_at   | GPR108          | 1,987559146  | 1,536652708  | 0,450906439 |  |
| 211642_at   | -               | -2,823166348 | -3,273861381 | 0,450695033 |  |
| 225642_at   | KT112 /// TXNDC | 2,310153708  | 1,859476797  | 0,450676911 |  |
| 1554115_at  | C5orf58         | -0,926850548 | -1,377419394 | 0,450568846 |  |
| 1560724_at  | -               | -0,926850548 | -1,377419394 | 0,450568846 |  |
| 211312_s_at | WISP1           | -0,926850548 | -1,377419394 | 0,450568846 |  |
| 215027_at   | RAPGEF3         | -0,926850548 | -1,377419394 | 0,450568846 |  |
| 217648_at   | -               | -0,926850548 | -1,377419394 | 0,450568846 |  |
| 223395_at   | ABI3BP          | -0,926850548 | -1,377419394 | 0,450568846 |  |

|              |              |              |              |             |  |
|--------------|--------------|--------------|--------------|-------------|--|
| 238241_at    | LOC100144602 | -0,926850548 | -1,377419394 | 0,450568846 |  |
| 242818_x_at  | -            | -0,926850548 | -1,377419394 | 0,450568846 |  |
| 243071_at    | -            | -0,926850548 | -1,377419394 | 0,450568846 |  |
| 202976_s_at  | RHOBTB3      | 5,192337655  | 4,741799874  | 0,450537782 |  |
| 243196_s_at  | TRAFD1       | 0,945567441  | 0,495031851  | 0,450535591 |  |
| 37079_at     | NUS1P3       | 1,538392922  | 1,088062085  | 0,450330837 |  |
| 212525_s_at  | H2AFX        | 1,187200746  | 0,73688026   | 0,450320486 |  |
| 1563105_at   | -            | 0,425644434  | -0,024572586 | 0,45021702  |  |
| 203217_s_at  | ST3GAL5      | 0,425644434  | -0,024572586 | 0,45021702  |  |
| 240496_at    | -            | 0,425644434  | -0,024572586 | 0,45021702  |  |
| 213350_at    | RPS11        | 3,498586477  | 3,048471686  | 0,450114791 |  |
| 205221_at    | HGD          | -0,196756757 | -0,646746079 | 0,449989321 |  |
| 206098_at    | ZBTB6        | -0,196756757 | -0,646746079 | 0,449989321 |  |
| 208363_s_at  | INPP4A       | -0,196756757 | -0,646746079 | 0,449989321 |  |
| 217193_x_at  | -            | -0,196756757 | -0,646746079 | 0,449989321 |  |
| 222945_x_at  | OLAH         | -0,196756757 | -0,646746079 | 0,449989321 |  |
| 228261_at    | MIB2         | -0,196756757 | -0,646746079 | 0,449989321 |  |
| 229315_at    | -            | -0,196756757 | -0,646746079 | 0,449989321 |  |
| 234668_at    | ALG13        | -0,196756757 | -0,646746079 | 0,449989321 |  |
| 1553315_at   | SLFNL1       | -2,504600601 | -2,954576755 | 0,449976154 |  |
| 1555195_at   | FBXO36       | -2,504600601 | -2,954576755 | 0,449976154 |  |
| 1555284_at   | ALS2         | -2,504600601 | -2,954576755 | 0,449976154 |  |
| 1555533_at   | QRFR         | -2,504600601 | -2,954576755 | 0,449976154 |  |
| 1557520_a_at | -            | -2,504600601 | -2,954576755 | 0,449976154 |  |
| 1570204_at   | ZBED3-AS1    | -2,504600601 | -2,954576755 | 0,449976154 |  |
| 205764_at    | CSNK1A1      | -2,504600601 | -2,954576755 | 0,449976154 |  |
| 224242_at    | GALP         | -2,504600601 | -2,954576755 | 0,449976154 |  |
| 224276_at    | ZNF33A       | -2,504600601 | -2,954576755 | 0,449976154 |  |
| 234163_at    | UBE3A        | -2,504600601 | -2,954576755 | 0,449976154 |  |
| 237395_at    | CYP4Z1       | -2,504600601 | -2,954576755 | 0,449976154 |  |
| 239503_at    | C10orf114    | -2,504600601 | -2,954576755 | 0,449976154 |  |
| 241245_at    | SRSF4        | -2,504600601 | -2,954576755 | 0,449976154 |  |
| 243925_at    | -            | -2,504600601 | -2,954576755 | 0,449976154 |  |
| 226746_s_at  | UBE4B        | 0,457392764  | 0,007421914  | 0,449970851 |  |
| 238647_at    | C14orf28     | 0,457392764  | 0,007421914  | 0,449970851 |  |
| 207416_s_at  | NFATC3       | 1,880387527  | 1,43051703   | 0,449870497 |  |
| 1556579_s_at | IGSF10       | 0,03125738   | -0,41858459  | 0,44984197  |  |
| 1567257_at   | OR1J2        | 0,03125738   | -0,41858459  | 0,44984197  |  |
| 202473_x_at  | HCFC1        | 0,03125738   | -0,41858459  | 0,44984197  |  |
| 209012_at    | TRIO         | 0,03125738   | -0,41858459  | 0,44984197  |  |
| 213432_at    | MUC5B        | 0,03125738   | -0,41858459  | 0,44984197  |  |
| 228494_at    | PPP1R9A      | 0,03125738   | -0,41858459  | 0,44984197  |  |
| 231710_at    | CAPS         | 0,03125738   | -0,41858459  | 0,44984197  |  |
| 232225_at    | -            | 0,03125738   | -0,41858459  | 0,44984197  |  |
| 244018_at    | -            | 0,03125738   | -0,41858459  | 0,44984197  |  |
| 207943_x_at  | PLAGL1       | 3,872077355  | 3,42231092   | 0,449766434 |  |
| 225810_at    | MTMR10       | 1,073999308  | 0,624460759  | 0,449538549 |  |
| 216713_at    | KRIT1        | 2,852640442  | 2,403170156  | 0,449470286 |  |
| 235348_at    | ABHD13       | 1,504602299  | 1,055274826  | 0,449327473 |  |
| 1555465_at   | MCOLN2       | 0,57782909   | 0,128747141  | 0,44908195  |  |
| 228594_at    | NADKD1       | 2,713311265  | 2,264418116  | 0,448893149 |  |
| 218430_s_at  | RFX7         | 1,578645857  | 1,129843209  | 0,448802648 |  |
| 224987_at    | C6orf89      | 1,751865623  | 1,303116084  | 0,448749538 |  |
| 1557801_x_at | C11orf31     | 0,228146222  | -0,220592223 | 0,448738445 |  |
| 220665_at    | LUZP4        | 0,228146222  | -0,220592223 | 0,448738445 |  |
| 205393_s_at  | CHEK1        | 2,825526235  | 2,376875125  | 0,44865111  |  |

|              |                   |              |              |             |  |
|--------------|-------------------|--------------|--------------|-------------|--|
| 1557289_s_at | GTF2IRD2 /// GT   | -1,763254337 | -2,211750327 | 0,44849599  |  |
| 1561880_a_at | SIGLEC16          | -1,763254337 | -2,211750327 | 0,44849599  |  |
| 1562865_at   | -                 | -1,763254337 | -2,211750327 | 0,44849599  |  |
| 204124_at    | SLC34A2           | -1,763254337 | -2,211750327 | 0,44849599  |  |
| 208281_x_at  | DAZ1 /// DAZ2 /// | -1,763254337 | -2,211750327 | 0,44849599  |  |
| 211151_x_at  | GH1               | -1,763254337 | -2,211750327 | 0,44849599  |  |
| 213950_s_at  | PPP3CC            | -1,763254337 | -2,211750327 | 0,44849599  |  |
| 222456_s_at  | LIMA1             | -1,763254337 | -2,211750327 | 0,44849599  |  |
| 234599_at    | -                 | -1,763254337 | -2,211750327 | 0,44849599  |  |
| 236603_at    | -                 | -1,763254337 | -2,211750327 | 0,44849599  |  |
| 241382_at    | PCP4L1            | -1,763254337 | -2,211750327 | 0,44849599  |  |
| 215096_s_at  | ESD               | 5,260285448  | 4,811797157  | 0,448488291 |  |
| 218598_at    | RINT1             | 2,701760055  | 2,253342112  | 0,448417943 |  |
| 1552408_at   | ODF4              | -1,71423189  | -2,162639771 | 0,448407882 |  |
| 1556573_s_at | LOC286178         | -1,71423189  | -2,162639771 | 0,448407882 |  |
| 1566786_at   | -                 | -1,71423189  | -2,162639771 | 0,448407882 |  |
| 205876_at    | LIFR              | -1,71423189  | -2,162639771 | 0,448407882 |  |
| 213855_s_at  | LIPE              | -1,71423189  | -2,162639771 | 0,448407882 |  |
| 216904_at    | LOC100652958      | -1,71423189  | -2,162639771 | 0,448407882 |  |
| 228893_at    | -                 | -1,71423189  | -2,162639771 | 0,448407882 |  |
| 231141_at    | LOC100506983      | -1,71423189  | -2,162639771 | 0,448407882 |  |
| 232982_at    | SYNRG             | -1,71423189  | -2,162639771 | 0,448407882 |  |
| 237454_at    | -                 | -1,71423189  | -2,162639771 | 0,448407882 |  |
| 239182_at    | HOXD-AS1          | -1,71423189  | -2,162639771 | 0,448407882 |  |
| 240110_at    | HMGCS2            | -1,71423189  | -2,162639771 | 0,448407882 |  |
| 240716_at    | TTC23             | -1,71423189  | -2,162639771 | 0,448407882 |  |
| 243398_at    | -                 | -1,71423189  | -2,162639771 | 0,448407882 |  |
| 1563005_at   | -                 | 0,715481152  | 0,26733076   | 0,448150392 |  |
| 212046_x_at  | MAPK3             | 2,59519831   | 2,147243253  | 0,447955057 |  |
| 216519_s_at  | PROSC             | -0,706943342 | -1,154897679 | 0,447954337 |  |
| 231621_at    | MPZL1             | -0,706943342 | -1,154897679 | 0,447954337 |  |
| 242203_at    | -                 | -0,706943342 | -1,154897679 | 0,447954337 |  |
| 242510_at    | -                 | -0,706943342 | -1,154897679 | 0,447954337 |  |
| 219261_at    | C7orf26           | 2,156646206  | 1,708698295  | 0,447947911 |  |
| 220955_x_at  | RAB23             | 2,501229299  | 2,053299695  | 0,447929604 |  |
| 230805_at    | -                 | 2,038300149  | 1,590454215  | 0,447845934 |  |
| 1553213_a_at | KRT78             | -1,838812296 | -2,286583451 | 0,447771154 |  |
| 1555729_a_at | CD209             | -1,838812296 | -2,286583451 | 0,447771154 |  |
| 1568375_at   | DEFB124           | -1,838812296 | -2,286583451 | 0,447771154 |  |
| 203863_at    | ACTN2             | -1,838812296 | -2,286583451 | 0,447771154 |  |
| 206265_s_at  | GPLD1             | -1,838812296 | -2,286583451 | 0,447771154 |  |
| 211398_at    | FGFR2             | -1,838812296 | -2,286583451 | 0,447771154 |  |
| 215945_s_at  | TRIM2             | -1,838812296 | -2,286583451 | 0,447771154 |  |
| 216496_s_at  | -                 | -1,838812296 | -2,286583451 | 0,447771154 |  |
| 216691_at    | -                 | -1,838812296 | -2,286583451 | 0,447771154 |  |
| 220268_at    | C11orf67          | -1,838812296 | -2,286583451 | 0,447771154 |  |
| 222822_s_at  | MMRN2             | -1,838812296 | -2,286583451 | 0,447771154 |  |
| 230299_s_at  | WNT5B             | -1,838812296 | -2,286583451 | 0,447771154 |  |
| 231030_at    | ZRANB2-AS1        | -1,838812296 | -2,286583451 | 0,447771154 |  |
| 234638_at    | -                 | -1,838812296 | -2,286583451 | 0,447771154 |  |
| 236326_at    | HDAC7             | -1,838812296 | -2,286583451 | 0,447771154 |  |
| 243352_at    | ALPK1             | -1,838812296 | -2,286583451 | 0,447771154 |  |
| 244091_at    | -                 | -1,838812296 | -2,286583451 | 0,447771154 |  |
| 213167_s_at  | SLC5A3            | 0,401366113  | -0,046302147 | 0,44766826  |  |
| 221595_at    | RBM48             | 0,401366113  | -0,046302147 | 0,44766826  |  |
| 207405_s_at  | RAD17             | 3,55745065   | 3,109937707  | 0,447512943 |  |

|              |                 |              |              |             |  |
|--------------|-----------------|--------------|--------------|-------------|--|
| 1554377_a_at | CNTNAP4         | -1,639579028 | -2,086984744 | 0,447405715 |  |
| 1554449_at   | MIER3           | -1,639579028 | -2,086984744 | 0,447405715 |  |
| 1562829_at   | LOC339568       | -1,639579028 | -2,086984744 | 0,447405715 |  |
| 207509_s_at  | LAIR2           | -1,639579028 | -2,086984744 | 0,447405715 |  |
| 207518_at    | DGKE            | -1,639579028 | -2,086984744 | 0,447405715 |  |
| 209074_s_at  | FAM107A /// LOC | -1,639579028 | -2,086984744 | 0,447405715 |  |
| 220362_at    | PSORS1C1        | -1,639579028 | -2,086984744 | 0,447405715 |  |
| 220534_at    | TRIM48          | -1,639579028 | -2,086984744 | 0,447405715 |  |
| 225720_at    | SYNPO2          | -1,639579028 | -2,086984744 | 0,447405715 |  |
| 231597_x_at  | -               | -1,639579028 | -2,086984744 | 0,447405715 |  |
| 231685_at    | -               | -1,639579028 | -2,086984744 | 0,447405715 |  |
| 234129_at    | ARHGEF12        | -1,639579028 | -2,086984744 | 0,447405715 |  |
| 237196_at    | LOC100506558 /  | -1,639579028 | -2,086984744 | 0,447405715 |  |
| 242171_at    | -               | -1,639579028 | -2,086984744 | 0,447405715 |  |
| 243515_at    | -               | -1,639579028 | -2,086984744 | 0,447405715 |  |
| 243582_at    | SH3RF2          | -1,639579028 | -2,086984744 | 0,447405715 |  |
| 215134_at    | PI4K2A          | 1,805273023  | 1,3579181    | 0,447354923 |  |
| 213746_s_at  | FLNA            | 3,120200849  | 2,672945617  | 0,447255232 |  |
| 209207_s_at  | SEC22B          | 3,191547726  | 2,744302548  | 0,447245178 |  |
| 1552917_at   | IL29            | -1,047650486 | -1,494668682 | 0,447018196 |  |
| 1557789_at   | -               | -1,047650486 | -1,494668682 | 0,447018196 |  |
| 205404_at    | HSD11B1         | -1,047650486 | -1,494668682 | 0,447018196 |  |
| 206417_at    | CNGA1           | -1,047650486 | -1,494668682 | 0,447018196 |  |
| 206797_at    | NAT2            | -1,047650486 | -1,494668682 | 0,447018196 |  |
| 210550_s_at  | RASGRF1         | -1,047650486 | -1,494668682 | 0,447018196 |  |
| 217009_at    | PGK2            | -1,047650486 | -1,494668682 | 0,447018196 |  |
| 220790_s_at  | MS4A5           | -1,047650486 | -1,494668682 | 0,447018196 |  |
| 232416_at    | CELF5           | -1,047650486 | -1,494668682 | 0,447018196 |  |
| 233555_s_at  | SULF2           | -1,047650486 | -1,494668682 | 0,447018196 |  |
| 237039_at    | LOC100506088    | -1,047650486 | -1,494668682 | 0,447018196 |  |
| 241769_at    | -               | -1,047650486 | -1,494668682 | 0,447018196 |  |
| 1553863_at   | WDFY4           | -1,888254346 | -2,335104118 | 0,446849772 |  |
| 1559270_at   | ZFHX4           | -1,888254346 | -2,335104118 | 0,446849772 |  |
| 205958_x_at  | CSHL1           | -1,888254346 | -2,335104118 | 0,446849772 |  |
| 207454_at    | GRIK3           | -1,888254346 | -2,335104118 | 0,446849772 |  |
| 208410_x_at  | AMELX           | -1,888254346 | -2,335104118 | 0,446849772 |  |
| 215709_at    | LOC100653079 /  | -1,888254346 | -2,335104118 | 0,446849772 |  |
| 230900_at    | CCDC110         | -1,888254346 | -2,335104118 | 0,446849772 |  |
| 238600_at    | JAKMIP1         | -1,888254346 | -2,335104118 | 0,446849772 |  |
| 239733_at    | DYDC2           | -1,888254346 | -2,335104118 | 0,446849772 |  |
| 240646_at    | GIMAP8          | -1,888254346 | -2,335104118 | 0,446849772 |  |
| 244469_at    | -               | -1,888254346 | -2,335104118 | 0,446849772 |  |
| 244526_at    | RASGRP3         | -1,888254346 | -2,335104118 | 0,446849772 |  |
| 226112_at    | SGCB            | 0,555999837  | 0,109221392  | 0,446778445 |  |
| 223168_at    | RHOA            | 1,783520648  | 1,337086025  | 0,446434623 |  |
| 227353_at    | TMC8            | -0,089689931 | -0,536087151 | 0,446397219 |  |
| 242074_at    | -               | -0,089689931 | -0,536087151 | 0,446397219 |  |
| 1561371_at   | FLJ39080        | -1,591296941 | -2,037551727 | 0,446254785 |  |
| 1570196_at   | -               | -1,591296941 | -2,037551727 | 0,446254785 |  |
| 1570270_at   | -               | -1,591296941 | -2,037551727 | 0,446254785 |  |
| 202952_s_at  | ADAM12          | -1,591296941 | -2,037551727 | 0,446254785 |  |
| 208307_at    | RBM1A1 /// RBM  | -1,591296941 | -2,037551727 | 0,446254785 |  |
| 208385_at    | NR2E3           | -1,591296941 | -2,037551727 | 0,446254785 |  |
| 211362_s_at  | SERPINB13       | -1,591296941 | -2,037551727 | 0,446254785 |  |
| 211457_at    | GABARAPL3       | -1,591296941 | -2,037551727 | 0,446254785 |  |
| 214392_at    | IRGC            | -1,591296941 | -2,037551727 | 0,446254785 |  |

|              |                  |              |              |             |  |
|--------------|------------------|--------------|--------------|-------------|--|
| 214466_at    | GJA5             | -1,591296941 | -2,037551727 | 0,446254785 |  |
| 215183_at    | -                | -1,591296941 | -2,037551727 | 0,446254785 |  |
| 220544_at    | TSKS             | -1,591296941 | -2,037551727 | 0,446254785 |  |
| 220834_at    | MS4A12           | -1,591296941 | -2,037551727 | 0,446254785 |  |
| 229188_s_at  | ZNRF2            | -1,591296941 | -2,037551727 | 0,446254785 |  |
| 231433_at    | LOC100506929     | -1,591296941 | -2,037551727 | 0,446254785 |  |
| 232879_at    | CRTC3            | -1,591296941 | -2,037551727 | 0,446254785 |  |
| 233840_at    | LOC100130950     | -1,591296941 | -2,037551727 | 0,446254785 |  |
| 234361_at    | CREB3L3          | -1,591296941 | -2,037551727 | 0,446254785 |  |
| 239270_at    | PLCXD3           | -1,591296941 | -2,037551727 | 0,446254785 |  |
| 239402_at    | -                | -1,591296941 | -2,037551727 | 0,446254785 |  |
| 240800_x_at  | -                | -1,591296941 | -2,037551727 | 0,446254785 |  |
| 240844_at    | -                | -1,591296941 | -2,037551727 | 0,446254785 |  |
| 231698_at    | FLJ36848         | 0,123193849  | -0,322870281 | 0,44606413  |  |
| 240934_at    | -                | 0,695652136  | 0,249604176  | 0,446047961 |  |
| 231821_x_at  | FLJ14186 /// LOC | 1,422536444  | 0,976641161  | 0,445895283 |  |
| 1557228_at   | EHBP1L1          | 0,798390451  | 0,352836757  | 0,445553694 |  |
| 1552602_at   | CACNG5           | -0,234278768 | -0,679763839 | 0,445485072 |  |
| 1553769_at   | SLAMF9           | -0,234278768 | -0,679763839 | 0,445485072 |  |
| 1557731_at   | LOC400620        | -0,234278768 | -0,679763839 | 0,445485072 |  |
| 208457_at    | GABRD            | -0,234278768 | -0,679763839 | 0,445485072 |  |
| 216340_s_at  | CYP2A7P1         | -0,234278768 | -0,679763839 | 0,445485072 |  |
| 219155_at    | PITPNC1          | -0,234278768 | -0,679763839 | 0,445485072 |  |
| 209575_at    | IL10RB           | 2,742596529  | 2,297144887  | 0,445451642 |  |
| 1556405_s_at | LOC374890        | -0,467091869 | -0,912331589 | 0,44523972  |  |
| 218621_at    | HEMK1            | -0,467091869 | -0,912331589 | 0,44523972  |  |
| 233137_at    | -                | -0,467091869 | -0,912331589 | 0,44523972  |  |
| 201320_at    | SMARCC2          | 1,835789711  | 1,390636111  | 0,4451536   |  |
| 1553402_a_at | HFE              | -2,551294263 | -2,996335703 | 0,44504144  |  |
| 1553454_at   | RPTN             | -2,551294263 | -2,996335703 | 0,44504144  |  |
| 1557674_s_at | EFCAB2           | -2,551294263 | -2,996335703 | 0,44504144  |  |
| 1570076_at   | -                | -2,551294263 | -2,996335703 | 0,44504144  |  |
| 203992_s_at  | KDM6A            | -2,551294263 | -2,996335703 | 0,44504144  |  |
| 220812_s_at  | HHLA2            | -2,551294263 | -2,996335703 | 0,44504144  |  |
| 231993_at    | ITGBL1           | -2,551294263 | -2,996335703 | 0,44504144  |  |
| 234136_at    | -                | -2,551294263 | -2,996335703 | 0,44504144  |  |
| 235075_at    | DSG3             | -2,551294263 | -2,996335703 | 0,44504144  |  |
| 242483_at    | -                | -2,551294263 | -2,996335703 | 0,44504144  |  |
| 1570230_at   | -                | -0,285837228 | -0,730778808 | 0,44494158  |  |
| 206890_at    | IL12RB1          | -0,285837228 | -0,730778808 | 0,44494158  |  |
| 207532_at    | CRYGD            | -0,285837228 | -0,730778808 | 0,44494158  |  |
| 243587_x_at  | -                | -0,285837228 | -0,730778808 | 0,44494158  |  |
| 241814_at    | -                | -2,866296344 | -3,311072652 | 0,444776308 |  |
| 227350_at    | HELLS            | 3,554701391  | 3,109937707  | 0,444763684 |  |
| 1553995_a_at | NT5E             | -1,964176657 | -2,408705138 | 0,444528481 |  |
| 1557907_x_at | MUC12            | -1,964176657 | -2,408705138 | 0,444528481 |  |
| 1559982_s_at | AKR1E2           | -1,964176657 | -2,408705138 | 0,444528481 |  |
| 1560220_a_at | CBY1             | -1,964176657 | -2,408705138 | 0,444528481 |  |
| 1560941_a_at | SACS-AS1         | -1,964176657 | -2,408705138 | 0,444528481 |  |
| 1567252_at   | OR10D3           | -1,964176657 | -2,408705138 | 0,444528481 |  |
| 1569062_s_at | IQGAP3           | -1,964176657 | -2,408705138 | 0,444528481 |  |
| 207592_s_at  | HCN2             | -1,964176657 | -2,408705138 | 0,444528481 |  |
| 212985_at    | APBB2            | -1,964176657 | -2,408705138 | 0,444528481 |  |
| 217463_s_at  | C11orf9          | -1,964176657 | -2,408705138 | 0,444528481 |  |
| 219912_s_at  | -                | -1,964176657 | -2,408705138 | 0,444528481 |  |
| 232482_at    | OR51E2           | -1,964176657 | -2,408705138 | 0,444528481 |  |

|              |                  |              |              |             |  |
|--------------|------------------|--------------|--------------|-------------|--|
| 233972_s_at  | FEZF2            | -1,964176657 | -2,408705138 | 0,444528481 |  |
| 234189_at    | -                | -1,964176657 | -2,408705138 | 0,444528481 |  |
| 235712_at    | GAS5-AS1         | -1,964176657 | -2,408705138 | 0,444528481 |  |
| 237050_at    | -                | -1,964176657 | -2,408705138 | 0,444528481 |  |
| 237484_at    | C12orf69         | -1,964176657 | -2,408705138 | 0,444528481 |  |
| 237575_at    | -                | -1,964176657 | -2,408705138 | 0,444528481 |  |
| 244856_at    | -                | -1,964176657 | -2,408705138 | 0,444528481 |  |
| 207193_at    | AGRP             | 0,503742507  | 0,059218869  | 0,444523639 |  |
| 210424_s_at  | GOLGA8A /// GO   | 0,503742507  | 0,059218869  | 0,444523639 |  |
| 218124_at    | RETSAT           | 1,04816921   | 0,603679647  | 0,444489564 |  |
| 229984_at    | DTWD1            | 1,04816921   | 0,603679647  | 0,444489564 |  |
| 226478_at    | TM7SF3           | 1,534677255  | 1,090553537  | 0,444123718 |  |
| 233518_at    | -                | 0,648296226  | 0,204310755  | 0,44398547  |  |
| 1556970_at   | -                | -0,888496123 | -1,332017329 | 0,443521207 |  |
| 205057_s_at  | IDUA             | -0,888496123 | -1,332017329 | 0,443521207 |  |
| 207279_s_at  | NEBL             | -0,888496123 | -1,332017329 | 0,443521207 |  |
| 208545_x_at  | MIR1257 /// TAF4 | -0,888496123 | -1,332017329 | 0,443521207 |  |
| 219872_at    | FAM198B          | -0,888496123 | -1,332017329 | 0,443521207 |  |
| 222128_at    | NSUN6            | -0,888496123 | -1,332017329 | 0,443521207 |  |
| 226358_at    | APH1B            | -0,888496123 | -1,332017329 | 0,443521207 |  |
| 229795_at    | -                | -0,888496123 | -1,332017329 | 0,443521207 |  |
| 236050_at    | C11orf35         | -0,888496123 | -1,332017329 | 0,443521207 |  |
| 236652_at    | LOC149703        | -0,888496123 | -1,332017329 | 0,443521207 |  |
| 242647_at    | USP34            | -0,888496123 | -1,332017329 | 0,443521207 |  |
| 1567060_at   | OR8G1            | -1,518072576 | -1,961547147 | 0,443474572 |  |
| 206975_at    | LTA              | -1,518072576 | -1,961547147 | 0,443474572 |  |
| 207149_at    | CDH12            | -1,518072576 | -1,961547147 | 0,443474572 |  |
| 213964_x_at  | C10orf95 /// LOC | -1,518072576 | -1,961547147 | 0,443474572 |  |
| 214261_s_at  | ADH6             | -1,518072576 | -1,961547147 | 0,443474572 |  |
| 231732_at    | SMPD3            | -1,518072576 | -1,961547147 | 0,443474572 |  |
| 236627_at    | -                | -1,518072576 | -1,961547147 | 0,443474572 |  |
| 236910_at    | MRPL39           | -1,518072576 | -1,961547147 | 0,443474572 |  |
| 237813_at    | PCBP2            | -1,518072576 | -1,961547147 | 0,443474572 |  |
| 238438_at    | CNOT6L           | -1,518072576 | -1,961547147 | 0,443474572 |  |
| 238997_at    | PSORS1C3         | -1,518072576 | -1,961547147 | 0,443474572 |  |
| 212633_at    | UFL1             | 2,922548342  | 2,479296438  | 0,443251904 |  |
| 238057_at    | USP45            | 1,912238072  | 1,469325098  | 0,442912974 |  |
| 212634_at    | UFL1             | 1,523472489  | 1,080561626  | 0,442910863 |  |
| 1558630_at   | -                | 0,052199481  | -0,39061235  | 0,442811831 |  |
| 226194_at    | CHAMP1           | 3,245961699  | 2,803210557  | 0,442751142 |  |
| 218840_s_at  | NADSYN1          | 1,596577845  | 1,153866761  | 0,442711084 |  |
| 1554448_at   | -                | -2,01371626  | -2,456406426 | 0,442690166 |  |
| 1556985_at   | -                | -2,01371626  | -2,456406426 | 0,442690166 |  |
| 1558337_at   | -                | -2,01371626  | -2,456406426 | 0,442690166 |  |
| 1559133_at   | -                | -2,01371626  | -2,456406426 | 0,442690166 |  |
| 1561578_s_at | SLC25A53         | -2,01371626  | -2,456406426 | 0,442690166 |  |
| 1562719_at   | -                | -2,01371626  | -2,456406426 | 0,442690166 |  |
| 1563341_at   | -                | -2,01371626  | -2,456406426 | 0,442690166 |  |
| 207208_at    | RBMXL2           | -2,01371626  | -2,456406426 | 0,442690166 |  |
| 208136_s_at  | MGC3771          | -2,01371626  | -2,456406426 | 0,442690166 |  |
| 211369_at    | -                | -2,01371626  | -2,456406426 | 0,442690166 |  |
| 215787_at    | ACTA2            | -2,01371626  | -2,456406426 | 0,442690166 |  |
| 216213_at    | NEK1             | -2,01371626  | -2,456406426 | 0,442690166 |  |
| 223887_at    | GPR132           | -2,01371626  | -2,456406426 | 0,442690166 |  |
| 244101_at    | -                | -2,01371626  | -2,456406426 | 0,442690166 |  |
| 209756_s_at  | MYCN             | 0,246434561  | -0,19610998  | 0,442544541 |  |



|              |                |              |              |             |  |
|--------------|----------------|--------------|--------------|-------------|--|
| 213635_s_at  | SAFB           | 0,246434561  | -0,19610998  | 0,442544541 |  |
| 235791_x_at  | CHD1           | 3,304956562  | 2,862725455  | 0,442231107 |  |
| 1554578_at   | ZNF70          | 0,417596971  | -0,024572586 | 0,442169557 |  |
| 1566512_at   | -              | 0,417596971  | -0,024572586 | 0,442169557 |  |
| 1567015_at   | NFE2L2         | -0,172274514 | -0,614371577 | 0,442097063 |  |
| 210407_at    | PPM1A          | -0,172274514 | -0,614371577 | 0,442097063 |  |
| 224268_x_at  | ZAN            | -0,172274514 | -0,614371577 | 0,442097063 |  |
| 238657_at    | UBXN10         | -0,172274514 | -0,614371577 | 0,442097063 |  |
| 242298_x_at  | -              | -0,172274514 | -0,614371577 | 0,442097063 |  |
| 235363_at    | -              | 2,874852734  | 2,432926755  | 0,44192598  |  |
| 228256_s_at  | EPB41L4A       | 3,880884266  | 3,439026336  | 0,44185793  |  |
| 225659_at    | SPOPL          | 1,481627361  | 1,039887232  | 0,44174013  |  |
| 210187_at    | FKBP1A         | 3,24026957   | 2,798646381  | 0,44162319  |  |
| 213851_at    | TMEM110        | 1,556829052  | 1,115234684  | 0,441594367 |  |
| 1558816_at   | ZNF664         | 0,735041319  | 0,293518836  | 0,441522484 |  |
| 225231_at    | CBL            | 2,834621043  | 2,39311332   | 0,441507723 |  |
| 203482_at    | FAM178A        | 3,097712429  | 2,656223838  | 0,441488591 |  |
| 1558476_at   | BEND5          | -1,173767127 | -1,615132408 | 0,441365281 |  |
| 206795_at    | F2RL2          | -1,173767127 | -1,615132408 | 0,441365281 |  |
| 215140_at    | -              | -1,173767127 | -1,615132408 | 0,441365281 |  |
| 231368_at    | BOD1L2         | -1,173767127 | -1,615132408 | 0,441365281 |  |
| 243054_at    | -              | -1,173767127 | -1,615132408 | 0,441365281 |  |
| 243825_at    | BCL6B          | 0,859074518  | 0,417770464  | 0,441304055 |  |
| 1557550_at   | LOC148145      | -1,470833215 | -1,912089812 | 0,441256597 |  |
| 1565939_at   | C5orf22        | -1,470833215 | -1,912089812 | 0,441256597 |  |
| 1566866_at   | -              | -1,470833215 | -1,912089812 | 0,441256597 |  |
| 1567167_at   | -              | -1,470833215 | -1,912089812 | 0,441256597 |  |
| 203393_at    | HES1           | -1,470833215 | -1,912089812 | 0,441256597 |  |
| 205253_at    | PBX1           | -1,470833215 | -1,912089812 | 0,441256597 |  |
| 207248_at    | KCNA4          | -1,470833215 | -1,912089812 | 0,441256597 |  |
| 223756_at    | KANSL3         | -1,470833215 | -1,912089812 | 0,441256597 |  |
| 232311_at    | B2M            | -1,470833215 | -1,912089812 | 0,441256597 |  |
| 233450_at    | -              | -1,470833215 | -1,912089812 | 0,441256597 |  |
| 236759_at    | -              | -1,470833215 | -1,912089812 | 0,441256597 |  |
| 238664_s_at  | MGC12916       | -1,470833215 | -1,912089812 | 0,441256597 |  |
| 240115_at    | LOC100286925   | -1,470833215 | -1,912089812 | 0,441256597 |  |
| 1557034_s_at | LOC100134445 / | 0,97328325   | 0,532164371  | 0,441118879 |  |
| 221943_x_at  | RPL38          | 3,973683876  | 3,532699346  | 0,44098453  |  |
| 1558409_at   | -              | -2,063149277 | -2,503677622 | 0,440528345 |  |
| 1558882_at   | HTATSF1P2      | -2,063149277 | -2,503677622 | 0,440528345 |  |
| 1560337_at   | LOC286184      | -2,063149277 | -2,503677622 | 0,440528345 |  |
| 1564760_at   | -              | -2,063149277 | -2,503677622 | 0,440528345 |  |
| 1569503_at   | HEATR5B        | -2,063149277 | -2,503677622 | 0,440528345 |  |
| 210937_s_at  | PDX1           | -2,063149277 | -2,503677622 | 0,440528345 |  |
| 215627_at    | -              | -2,063149277 | -2,503677622 | 0,440528345 |  |
| 215859_at    | NCLN           | -2,063149277 | -2,503677622 | 0,440528345 |  |
| 224396_s_at  | ASPN           | -2,063149277 | -2,503677622 | 0,440528345 |  |
| 237746_at    | -              | -2,063149277 | -2,503677622 | 0,440528345 |  |
| 238966_at    | CELF4          | -2,063149277 | -2,503677622 | 0,440528345 |  |
| 239572_at    | GJA3           | -2,063149277 | -2,503677622 | 0,440528345 |  |
| 241622_at    | PTPN2          | -2,063149277 | -2,503677622 | 0,440528345 |  |
| 1558292_s_at | PIGW           | 3,574742007  | 3,134292219  | 0,440449788 |  |
| 222399_s_at  | TM9SF3         | 5,201887051  | 4,761478085  | 0,440408966 |  |
| 228600_x_at  | FAM221A        | 1,850809354  | 1,410714371  | 0,440094983 |  |
| 1556912_at   | GIT2           | -2,597496523 | -3,037500868 | 0,440004345 |  |
| 1568856_at   | NBR1           | -2,597496523 | -3,037500868 | 0,440004345 |  |

|              |                 |              |              |             |  |
|--------------|-----------------|--------------|--------------|-------------|--|
| 214046_at    | FUT9            | -2,597496523 | -3,037500868 | 0,440004345 |  |
| 220655_at    | TNIP3           | -2,597496523 | -3,037500868 | 0,440004345 |  |
| 239520_at    | -               | -2,597496523 | -3,037500868 | 0,440004345 |  |
| 241880_x_at  | -               | -2,597496523 | -3,037500868 | 0,440004345 |  |
| 242003_at    | ERICH1          | -2,597496523 | -3,037500868 | 0,440004345 |  |
| 1556382_a_at | NAA15           | -0,67289328  | -1,112851844 | 0,439958564 |  |
| 1556452_a_at | LOC283761       | -0,67289328  | -1,112851844 | 0,439958564 |  |
| 1561202_at   | -               | -0,67289328  | -1,112851844 | 0,439958564 |  |
| 1562826_at   | -               | -0,67289328  | -1,112851844 | 0,439958564 |  |
| 1564314_at   | LOC219690       | -0,67289328  | -1,112851844 | 0,439958564 |  |
| 230119_at    | -               | -0,67289328  | -1,112851844 | 0,439958564 |  |
| 230897_at    | CCDC30 /// PPC3 | -0,67289328  | -1,112851844 | 0,439958564 |  |
| 231266_at    | LYPD4           | -0,67289328  | -1,112851844 | 0,439958564 |  |
| 235102_x_at  | SNORD3B-1 /// S | -0,67289328  | -1,112851844 | 0,439958564 |  |
| 239190_at    | VRK3            | -0,67289328  | -1,112851844 | 0,439958564 |  |
| 224321_at    | TMEFF2          | 2,030406107  | 1,590454215  | 0,439951892 |  |
| 1555114_at   | ATP6V0A2        | -0,325749314 | -0,765504029 | 0,439754715 |  |
| 1557817_a_at | -               | -0,325749314 | -0,765504029 | 0,439754715 |  |
| 1560492_at   | -               | -0,325749314 | -0,765504029 | 0,439754715 |  |
| 1563668_at   | MORN1           | -0,325749314 | -0,765504029 | 0,439754715 |  |
| 206923_at    | PRKCA           | -0,325749314 | -0,765504029 | 0,439754715 |  |
| 233362_at    | ZNF341          | -0,325749314 | -0,765504029 | 0,439754715 |  |
| 244554_at    | -               | -0,325749314 | -0,765504029 | 0,439754715 |  |
| 243511_at    | -               | 0,181384709  | -0,258114234 | 0,439498943 |  |
| 203783_x_at  | POLRMT          | 0,359971644  | -0,079522948 | 0,439494592 |  |
| 228861_at    | CDS2            | 0,359971644  | -0,079522948 | 0,439494592 |  |
| 229484_at    | PPM1J           | 0,359971644  | -0,079522948 | 0,439494592 |  |
| 229253_at    | THEM4           | 2,956271699  | 2,516830926  | 0,439440774 |  |
| 1559245_at   | -               | 0,518867317  | 0,079428135  | 0,439439182 |  |
| 201452_at    | RHEB            | 0,518867317  | 0,079428135  | 0,439439182 |  |
| 231548_at    | FOXO3           | 0,518867317  | 0,079428135  | 0,439439182 |  |
| 206094_x_at  | UGT1A1 /// UGT1 | 0,661985843  | 0,222599095  | 0,439386748 |  |
| 221493_at    | TSPYL1          | 4,744881223  | 4,305575871  | 0,439305352 |  |
| 1554880_at   | DKFZP434K028    | 0,020670649  | -0,41858459  | 0,439255239 |  |
| 213672_at    | MARS            | 0,020670649  | -0,41858459  | 0,439255239 |  |
| 215906_at    | -               | 0,020670649  | -0,41858459  | 0,439255239 |  |
| 233325_at    | SLC35D2         | 0,020670649  | -0,41858459  | 0,439255239 |  |
| 219199_at    | AFF4            | -0,022466681 | -0,461594427 | 0,439127746 |  |
| 230885_at    | SPG7            | -0,022466681 | -0,461594427 | 0,439127746 |  |
| 235685_at    | -               | -0,022466681 | -0,461594427 | 0,439127746 |  |
| 47105_at     | DUS2L           | 1,799091453  | 1,359984858  | 0,439106595 |  |
| 202351_at    | ITGAV           | 3,319065909  | 2,880111483  | 0,438954426 |  |
| 1552690_a_at | CACNA2D4        | -1,424023738 | -1,862647763 | 0,438624024 |  |
| 1558418_at   | -               | -1,424023738 | -1,862647763 | 0,438624024 |  |
| 1562821_a_at | DSCAM-AS1       | -1,424023738 | -1,862647763 | 0,438624024 |  |
| 1563073_at   | -               | -1,424023738 | -1,862647763 | 0,438624024 |  |
| 1566851_at   | TRIM42          | -1,424023738 | -1,862647763 | 0,438624024 |  |
| 215547_at    | TSC22D2         | -1,424023738 | -1,862647763 | 0,438624024 |  |
| 216144_at    | -               | -1,424023738 | -1,862647763 | 0,438624024 |  |
| 218863_s_at  | TNS1            | -1,424023738 | -1,862647763 | 0,438624024 |  |
| 221091_at    | INSL5           | -1,424023738 | -1,862647763 | 0,438624024 |  |
| 224251_at    | WDR96           | -1,424023738 | -1,862647763 | 0,438624024 |  |
| 232379_at    | SKIL            | -1,424023738 | -1,862647763 | 0,438624024 |  |
| 232484_at    | -               | -1,424023738 | -1,862647763 | 0,438624024 |  |
| 232607_at    | -               | -1,424023738 | -1,862647763 | 0,438624024 |  |
| 237655_at    | -               | -1,424023738 | -1,862647763 | 0,438624024 |  |

|              |                   |              |              |             |  |
|--------------|-------------------|--------------|--------------|-------------|--|
| 242465_at    | LOC100505592      | -1,424023738 | -1,862647763 | 0,438624024 |  |
| 244013_at    | -                 | -1,424023738 | -1,862647763 | 0,438624024 |  |
| 244210_at    | -                 | -1,424023738 | -1,862647763 | 0,438624024 |  |
| 209708_at    | MOXD1             | -0,512251684 | -0,950686014 | 0,43843433  |  |
| 217995_at    | SQRDL             | -0,512251684 | -0,950686014 | 0,43843433  |  |
| 234125_at    | -                 | -0,512251684 | -0,950686014 | 0,43843433  |  |
| 235269_at    | FAM83F            | -0,512251684 | -0,950686014 | 0,43843433  |  |
| 238742_x_at  | -                 | -0,512251684 | -0,950686014 | 0,43843433  |  |
| 235767_x_at  | PHAX              | 2,396622324  | 1,958277216  | 0,438345107 |  |
| 233936_s_at  | GGNBP2            | 2,166283906  | 1,728030156  | 0,438253749 |  |
| 219131_at    | UBIAD1            | 2,035673598  | 1,59747851   | 0,438195088 |  |
| 205072_s_at  | XRCC4             | 1,129248302  | 0,691645685  | 0,437602617 |  |
| 212572_at    | STK38L            | 0,917308734  | 0,479907041  | 0,437401693 |  |
| 235103_at    | MAN2A1            | 2,069451339  | 1,632095957  | 0,437355382 |  |
| 232130_at    | -                 | 2,708372067  | 2,271023131  | 0,437348936 |  |
| 244842_x_at  | -                 | 0,747935635  | 0,310717132  | 0,437218503 |  |
| 240054_at    | -                 | 0,613492853  | 0,176436073  | 0,43705678  |  |
| 1563916_at   | WDR11-AS1         | -0,986356909 | -1,423348341 | 0,436991433 |  |
| 1568879_a_at | LAMA3             | -0,986356909 | -1,423348341 | 0,436991433 |  |
| 204792_s_at  | IFT140            | -0,986356909 | -1,423348341 | 0,436991433 |  |
| 205833_s_at  | PART1             | -0,986356909 | -1,423348341 | 0,436991433 |  |
| 214156_at    | MYRIP             | -0,986356909 | -1,423348341 | 0,436991433 |  |
| 217261_at    | TTY2 /// TTTY2    | -0,986356909 | -1,423348341 | 0,436991433 |  |
| 229096_at    | LIMS3 /// LIMS3-I | -0,986356909 | -1,423348341 | 0,436991433 |  |
| 230614_at    | -                 | -0,986356909 | -1,423348341 | 0,436991433 |  |
| 233401_at    | -                 | -0,986356909 | -1,423348341 | 0,436991433 |  |
| 240670_at    | -                 | -0,986356909 | -1,423348341 | 0,436991433 |  |
| 213959_s_at  | RPGRIP1L          | 0,496120222  | 0,059218869  | 0,436901353 |  |
| 229673_at    | C14orf118         | 0,496120222  | 0,059218869  | 0,436901353 |  |
| 221784_at    | WIZ               | 0,46522187   | 0,028364014  | 0,436857856 |  |
| 236974_at    | -                 | 0,46522187   | 0,028364014  | 0,436857856 |  |
| 212916_at    | PHF8              | 2,272723257  | 1,835911187  | 0,43681207  |  |
| 210630_s_at  | RAD52             | 0,334552598  | -0,102100538 | 0,436653136 |  |
| 226213_at    | ERBB3             | 0,334552598  | -0,102100538 | 0,436653136 |  |
| 234954_at    | -                 | 2,102456302  | 1,665902186  | 0,436554116 |  |
| 226860_at    | TMEM19            | 2,819431021  | 2,382985886  | 0,436445135 |  |
| 1553059_at   | PGLYRP3           | -2,138804305 | -2,575129729 | 0,436325424 |  |
| 1560838_at   | FAM217A           | -2,138804305 | -2,575129729 | 0,436325424 |  |
| 1564504_at   | ASIC5             | -2,138804305 | -2,575129729 | 0,436325424 |  |
| 1564729_at   | -                 | -2,138804305 | -2,575129729 | 0,436325424 |  |
| 1570051_at   | RNF144A           | -2,138804305 | -2,575129729 | 0,436325424 |  |
| 207322_at    | ITSN1             | -2,138804305 | -2,575129729 | 0,436325424 |  |
| 210611_s_at  | DTNA              | -2,138804305 | -2,575129729 | 0,436325424 |  |
| 223928_s_at  | GUCA1C            | -2,138804305 | -2,575129729 | 0,436325424 |  |
| 233751_at    | ZFXH3             | -2,138804305 | -2,575129729 | 0,436325424 |  |
| 239514_at    | LOC100505784      | -2,138804305 | -2,575129729 | 0,436325424 |  |
| 1568613_at   | RSPH3             | 2,38635068   | 1,950068772  | 0,436281907 |  |
| 209741_x_at  | SCAPER            | 0,152582607  | -0,283667828 | 0,436250434 |  |
| 214244_s_at  | LOC100652765      | 0,152582607  | -0,283667828 | 0,436250434 |  |
| 227059_at    | GPC6              | 0,152582607  | -0,283667828 | 0,436250434 |  |
| 227496_at    | LOC253842 /// N   | 0,152582607  | -0,283667828 | 0,436250434 |  |
| 244713_at    | -                 | 0,152582607  | -0,283667828 | 0,436250434 |  |
| 203203_s_at  | KRR1              | 2,868962815  | 2,432926755  | 0,43603606  |  |
| 218846_at    | MED23             | 4,136978698  | 3,701119714  | 0,435858983 |  |
| 232194_at    | METTL4            | 1,073999308  | 0,638150376  | 0,435848932 |  |
| 209931_s_at  | FKBP1B /// MFS    | -0,57445847  | -1,010192375 | 0,435733905 |  |

|              |                |              |              |             |  |
|--------------|----------------|--------------|--------------|-------------|--|
| 212425_at    | SCAMP1         | -0,57445847  | -1,010192375 | 0,435733905 |  |
| 224529_s_at  | NT5C1A         | -0,57445847  | -1,010192375 | 0,435733905 |  |
| 228198_s_at  | FAHD2B /// FAH | -0,57445847  | -1,010192375 | 0,435733905 |  |
| 233091_at    | ATAD3B         | -0,57445847  | -1,010192375 | 0,435733905 |  |
| 236356_at    | NDUFS1         | -0,57445847  | -1,010192375 | 0,435733905 |  |
| 215499_at    | MAP2K3         | 3,179700672  | 2,744302548  | 0,435398124 |  |
| 228505_s_at  | TMEM170A       | 1,515954005  | 1,080561626  | 0,43539238  |  |
| 232642_at    | VWA5B2         | -0,055687482 | -0,490927335 | 0,435239853 |  |
| 235782_at    | -              | -0,055687482 | -0,490927335 | 0,435239853 |  |
| 235958_at    | PLA2G4F        | -0,055687482 | -0,490927335 | 0,435239853 |  |
| 224642_at    | FYTDD1         | 2,501229299  | 2,066015817  | 0,435213482 |  |
| 213702_x_at  | ASAH1          | 5,922207779  | 5,487019892  | 0,435187887 |  |
| 223238_s_at  | PBRM1          | 4,099113343  | 3,663961904  | 0,435151438 |  |
| 208654_s_at  | CD164          | 5,38907564   | 4,954036493  | 0,435039147 |  |
| 212538_at    | DOCK9          | 0,728550685  | 0,293518836  | 0,43503185  |  |
| 212662_at    | PVR            | 0,728550685  | 0,293518836  | 0,43503185  |  |
| 226124_at    | ZFP90          | 1,805273023  | 1,370274469  | 0,434998554 |  |
| 1553962_s_at | RHOB           | 0,702292136  | 0,26733076   | 0,434961377 |  |
| 228572_at    | -              | 0,702292136  | 0,26733076   | 0,434961377 |  |
| 236961_at    | -              | 0,702292136  | 0,26733076   | 0,434961377 |  |
| 216899_s_at  | SKAP2          | 2,077135162  | 1,642321262  | 0,434813899 |  |
| 238199_x_at  | COX3           | 4,439816047  | 4,005038666  | 0,434777381 |  |
| 1555761_x_at | RBM15          | 1,269985355  | 0,835239052  | 0,434746302 |  |
| 234734_s_at  | TNRC6A         | 2,433006244  | 1,998633167  | 0,434373077 |  |
| 213810_s_at  | AKIRIN2-AS1    | 0,44160593   | 0,007421914  | 0,434184016 |  |
| 242241_x_at  | -              | 0,44160593   | 0,007421914  | 0,434184016 |  |
| 229843_at    | FAM82B         | 1,037706275  | 0,603679647  | 0,434026628 |  |
| 1552790_a_at | SEC62          | 0,273439642  | -0,160136748 | 0,43357639  |  |
| 210451_at    | PKLR           | 0,273439642  | -0,160136748 | 0,43357639  |  |
| 222068_s_at  | DNAAF1         | 0,273439642  | -0,160136748 | 0,43357639  |  |
| 1552508_at   | KCNE4          | -1,353583928 | -1,787089803 | 0,433505875 |  |
| 1557900_at   | SIM2           | -1,353583928 | -1,787089803 | 0,433505875 |  |
| 1564383_s_at | FLJ35934       | -1,353583928 | -1,787089803 | 0,433505875 |  |
| 204345_at    | COL16A1        | -1,353583928 | -1,787089803 | 0,433505875 |  |
| 210404_x_at  | CAMK2B         | -1,353583928 | -1,787089803 | 0,433505875 |  |
| 214814_at    | YTHDC1         | -1,353583928 | -1,787089803 | 0,433505875 |  |
| 223652_at    | AS3MT          | -1,353583928 | -1,787089803 | 0,433505875 |  |
| 229902_at    | FLT4           | -1,353583928 | -1,787089803 | 0,433505875 |  |
| 234671_at    | KRTAP4-2       | -1,353583928 | -1,787089803 | 0,433505875 |  |
| 236001_at    | LOC100289255   | -1,353583928 | -1,787089803 | 0,433505875 |  |
| 239695_at    | JAK1           | -1,353583928 | -1,787089803 | 0,433505875 |  |
| 241156_at    | -              | -1,353583928 | -1,787089803 | 0,433505875 |  |
| 242035_at    | -              | -1,353583928 | -1,787089803 | 0,433505875 |  |
| 212956_at    | TBC1D9         | 1,326951551  | 0,893473268  | 0,433478283 |  |
| 1556318_s_at | CAND1          | -2,187914861 | -2,621331989 | 0,433417128 |  |
| 1563725_at   | ZNF583         | -2,187914861 | -2,621331989 | 0,433417128 |  |
| 205893_at    | NLGN1          | -2,187914861 | -2,621331989 | 0,433417128 |  |
| 207349_s_at  | UCP3           | -2,187914861 | -2,621331989 | 0,433417128 |  |
| 213725_x_at  | XYLT1          | -2,187914861 | -2,621331989 | 0,433417128 |  |
| 216214_at    | -              | -2,187914861 | -2,621331989 | 0,433417128 |  |
| 217566_s_at  | TGM4           | -2,187914861 | -2,621331989 | 0,433417128 |  |
| 230468_s_at  | C1orf56        | -2,187914861 | -2,621331989 | 0,433417128 |  |
| 233095_at    | -              | -2,187914861 | -2,621331989 | 0,433417128 |  |
| 236444_x_at  | -              | -2,187914861 | -2,621331989 | 0,433417128 |  |
| 244606_at    | -              | -2,187914861 | -2,621331989 | 0,433417128 |  |
| 244880_at    | -              | -2,187914861 | -2,621331989 | 0,433417128 |  |

|              |                   |              |              |             |  |
|--------------|-------------------|--------------|--------------|-------------|--|
| 201466_s_at  | JUN               | 2,327437554  | 1,894118818  | 0,433318736 |  |
| 235006_at    | CDKN2AIPNL        | 1,238353345  | 0,805216064  | 0,433137281 |  |
| 218306_s_at  | HERC1             | 3,508091848  | 3,075135559  | 0,43295629  |  |
| 1558105_a_at | SLC9A7            | 0,083054335  | -0,34958478  | 0,432639115 |  |
| 1560818_at   | LOC387895         | 0,083054335  | -0,34958478  | 0,432639115 |  |
| 1569002_x_at | BMP1              | 0,083054335  | -0,34958478  | 0,432639115 |  |
| 204136_at    | COL7A1            | 0,083054335  | -0,34958478  | 0,432639115 |  |
| 206086_x_at  | HFE               | 0,083054335  | -0,34958478  | 0,432639115 |  |
| 211468_s_at  | RECQL5            | 0,083054335  | -0,34958478  | 0,432639115 |  |
| 211872_s_at  | RGS11             | 0,083054335  | -0,34958478  | 0,432639115 |  |
| 230049_at    | TAF6L             | 0,083054335  | -0,34958478  | 0,432639115 |  |
| 237642_at    | CTBP1-AS1         | 0,083054335  | -0,34958478  | 0,432639115 |  |
| 242332_at    | FOXF1-AS1         | 0,083054335  | -0,34958478  | 0,432639115 |  |
| 214101_s_at  | -                 | 1,104397092  | 0,67181667   | 0,432580422 |  |
| 1552921_a_at | FIGNL1            | 2,134723057  | 1,702196344  | 0,432526713 |  |
| 1553313_s_at | SLC5A3            | -0,423248115 | -0,855751026 | 0,432502911 |  |
| 1553812_at   | TLE6              | -0,423248115 | -0,855751026 | 0,432502911 |  |
| 208439_s_at  | FCN2              | -0,423248115 | -0,855751026 | 0,432502911 |  |
| 209827_s_at  | IL16              | -0,423248115 | -0,855751026 | 0,432502911 |  |
| 215756_at    | LOC730227         | -0,423248115 | -0,855751026 | 0,432502911 |  |
| 235519_at    | FOXK1             | -0,423248115 | -0,855751026 | 0,432502911 |  |
| 235832_at    | NKX6-2            | -0,423248115 | -0,855751026 | 0,432502911 |  |
| 236288_at    | RNF34             | -0,423248115 | -0,855751026 | 0,432502911 |  |
| 227894_at    | WDR90             | 1,850809354  | 1,418668082  | 0,432141272 |  |
| 1554335_at   | CYTH4             | -0,83191556  | -1,264005341 | 0,432089781 |  |
| 1562425_at   | FARP1             | -0,83191556  | -1,264005341 | 0,432089781 |  |
| 1570371_a_at | EPT1              | -0,83191556  | -1,264005341 | 0,432089781 |  |
| 205295_at    | CKMT2             | -0,83191556  | -1,264005341 | 0,432089781 |  |
| 206620_at    | GRAP              | -0,83191556  | -1,264005341 | 0,432089781 |  |
| 211643_x_at  | IGK@ /// IGKC     | -0,83191556  | -1,264005341 | 0,432089781 |  |
| 214163_at    | HSPB11            | -0,83191556  | -1,264005341 | 0,432089781 |  |
| 215173_at    | DNAAF1            | -0,83191556  | -1,264005341 | 0,432089781 |  |
| 220592_at    | CCDC40            | -0,83191556  | -1,264005341 | 0,432089781 |  |
| 231367_s_at  | -                 | -0,83191556  | -1,264005341 | 0,432089781 |  |
| 231509_at    | PPP1R17           | -0,83191556  | -1,264005341 | 0,432089781 |  |
| 237186_at    | KCNJ5             | -0,83191556  | -1,264005341 | 0,432089781 |  |
| 237695_at    | -                 | -0,83191556  | -1,264005341 | 0,432089781 |  |
| 242817_at    | PGLYRP2           | -0,83191556  | -1,264005341 | 0,432089781 |  |
| 243385_at    | -                 | -0,83191556  | -1,264005341 | 0,432089781 |  |
| 244834_at    | RSG1              | -0,83191556  | -1,264005341 | 0,432089781 |  |
| 1552988_at   | C11orf65          | -2,667025278 | -3,098858316 | 0,431833039 |  |
| 1559258_a_at | CXorf61           | -2,667025278 | -3,098858316 | 0,431833039 |  |
| 231677_at    | LOC100506165      | -2,667025278 | -3,098858316 | 0,431833039 |  |
| 237361_at    | -                 | -2,667025278 | -3,098858316 | 0,431833039 |  |
| 243320_at    | -                 | -2,667025278 | -3,098858316 | 0,431833039 |  |
| 1560250_s_at | LOC284242         | -0,299034815 | -0,730778808 | 0,431743993 |  |
| 215274_at    | SLC12A3           | -0,299034815 | -0,730778808 | 0,431743993 |  |
| 227909_at    | LINC00086 /// LIN | -0,299034815 | -0,730778808 | 0,431743993 |  |
| 231727_s_at  | MIF4GD            | 0,911589958  | 0,479907041  | 0,431682917 |  |
| 238709_at    | ELP2              | 0,911589958  | 0,479907041  | 0,431682917 |  |
| 212464_s_at  | FN1               | 2,107467633  | 1,675891488  | 0,431576145 |  |
| 225980_at    | C14orf43          | 2,644299732  | 2,212749286  | 0,431550445 |  |
| 222740_at    | ATAD2             | 5,053824781  | 4,622479552  | 0,43134523  |  |
| 1555681_at   | -                 | 0,384950573  | -0,046302147 | 0,43125272  |  |
| 218348_s_at  | ZC3H7A            | 2,883642771  | 2,452428893  | 0,431213877 |  |
| 214697_s_at  | PTBP3             | 2,450859799  | 2,019703483  | 0,431156316 |  |

|              |                 |              |              |             |  |
|--------------|-----------------|--------------|--------------|-------------|--|
| 201321_s_at  | SMARCC2         | 1,841816345  | 1,410714371  | 0,431101974 |  |
| 220091_at    | SLC2A6          | 0,767063567  | 0,336136178  | 0,430927389 |  |
| 228820_at    | XPNPEP3         | 1,089278259  | 0,658444279  | 0,43083398  |  |
| 212883_at    | APOE            | 1,352503698  | 0,921731975  | 0,430771723 |  |
| 219493_at    | SHCBP1          | 3,600740871  | 3,170070041  | 0,43067083  |  |
| 204739_at    | CENPC1          | 2,227406889  | 1,796776588  | 0,430630301 |  |
| 1559471_s_at | D21S2088E       | -0,136301282 | -0,566887459 | 0,430586177 |  |
| 217692_at    | MAGOH2          | -0,136301282 | -0,566887459 | 0,430586177 |  |
| 225322_s_at  | C17orf70        | -0,136301282 | -0,566887459 | 0,430586177 |  |
| 229575_at    | -               | -0,136301282 | -0,566887459 | 0,430586177 |  |
| 236076_at    | LOC257396       | -0,136301282 | -0,566887459 | 0,430586177 |  |
| 1558220_at   | -               | -0,946847173 | -1,377419394 | 0,430572221 |  |
| 1569189_at   | TTC9C           | -0,946847173 | -1,377419394 | 0,430572221 |  |
| 211819_s_at  | SORBS1          | -0,946847173 | -1,377419394 | 0,430572221 |  |
| 214191_at    | ICA1            | -0,946847173 | -1,377419394 | 0,430572221 |  |
| 215551_at    | ESR1            | -0,946847173 | -1,377419394 | 0,430572221 |  |
| 215990_s_at  | BCL6            | -0,946847173 | -1,377419394 | 0,430572221 |  |
| 223957_at    | -               | -0,946847173 | -1,377419394 | 0,430572221 |  |
| 230671_at    | -               | -0,946847173 | -1,377419394 | 0,430572221 |  |
| 238345_at    | SLC38A10        | -0,946847173 | -1,377419394 | 0,430572221 |  |
| 238582_at    | C21orf2         | -0,946847173 | -1,377419394 | 0,430572221 |  |
| 238683_at    | ZNF524          | -0,946847173 | -1,377419394 | 0,430572221 |  |
| 242354_at    | -               | -0,946847173 | -1,377419394 | 0,430572221 |  |
| 242367_at    | -               | -0,946847173 | -1,377419394 | 0,430572221 |  |
| 244371_at    | -               | -0,946847173 | -1,377419394 | 0,430572221 |  |
| 226152_at    | TTC7B           | 4,08075718   | 3,650516168  | 0,430241012 |  |
| 239807_at    | -               | 0,984222186  | 0,553993624  | 0,430228561 |  |
| 1553034_at   | SDCCAG8         | 0,209623097  | -0,220592223 | 0,430215321 |  |
| 230025_at    | GJD3            | 0,209623097  | -0,220592223 | 0,430215321 |  |
| 200965_s_at  | ABLIM1          | 1,247462054  | 0,817300337  | 0,430161717 |  |
| 225786_at    | HNRNPU-AS1      | 1,247462054  | 0,817300337  | 0,430161717 |  |
| 37996_s_at   | DMPK            | 0,421626332  | -0,008482952 | 0,430109284 |  |
| 212926_at    | SMC5            | 0,606430281  | 0,176436073  | 0,429994208 |  |
| 230160_x_at  | -               | 0,606430281  | 0,176436073  | 0,429994208 |  |
| 239314_at    | NHLRC3          | 0,606430281  | 0,176436073  | 0,429994208 |  |
| 224570_s_at  | IRF2BP2         | 3,962664437  | 3,532699346  | 0,42996509  |  |
| 1557146_a_at | SSTR5-AS1       | -1,308181863 | -1,738067356 | 0,429885493 |  |
| 216916_s_at  | DLGAP2          | -1,308181863 | -1,738067356 | 0,429885493 |  |
| 230128_at    | IGLL5           | -1,308181863 | -1,738067356 | 0,429885493 |  |
| 233018_at    | TMEM134         | -1,308181863 | -1,738067356 | 0,429885493 |  |
| 233242_at    | WDR73           | -1,308181863 | -1,738067356 | 0,429885493 |  |
| 233382_at    | -               | -1,308181863 | -1,738067356 | 0,429885493 |  |
| 239361_at    | -               | -1,308181863 | -1,738067356 | 0,429885493 |  |
| 243014_at    | -               | -1,308181863 | -1,738067356 | 0,429885493 |  |
| 205250_s_at  | CEP290          | 1,390002893  | 0,960386719  | 0,429616174 |  |
| 202231_at    | EIF3M           | 6,339652993  | 5,910321048  | 0,429331946 |  |
| 220731_s_at  | NECAP2          | 2,959046717  | 2,529740643  | 0,429306075 |  |
| 201297_s_at  | MOB1A           | 2,094906514  | 1,665902186  | 0,429004329 |  |
| 218251_at    | MID1IP1         | 1,666156729  | 1,23718272   | 0,428974009 |  |
| 203870_at    | USP46           | 1,799091453  | 1,370274469  | 0,428816984 |  |
| 227075_at    | ELP3            | 2,81177561   | 2,382985886  | 0,428789724 |  |
| 201855_s_at  | ATMIN           | 3,010782559  | 2,582026171  | 0,428756388 |  |
| 1552344_s_at | CNOT7           | 3,532516649  | 3,103784293  | 0,428732356 |  |
| 230265_at    | SEL1L           | 2,86748657   | 2,438805127  | 0,428681443 |  |
| 214152_at    | CCPG1 /// DYX10 | 1,442503549  | 1,013870809  | 0,42863274  |  |
| 205527_s_at  | GEMIN4          | 3,028064153  | 2,599625088  | 0,428439065 |  |

|              |                  |              |              |             |  |
|--------------|------------------|--------------|--------------|-------------|--|
| 242618_at    | HCG18            | 1,215326747  | 0,786897721  | 0,428429026 |  |
| 225457_s_at  | LINC00263 /// PF | 2,001086023  | 1,572742379  | 0,428343644 |  |
| 200684_s_at  | UBE2L3           | 2,945117939  | 2,516830926  | 0,428287014 |  |
| 208516_at    | MTNR1B           | -0,033456564 | -0,461594427 | 0,428137862 |  |
| 228134_at    | MYH11            | -0,033456564 | -0,461594427 | 0,428137862 |  |
| 239188_at    | PPP2R3C          | -0,033456564 | -0,461594427 | 0,428137862 |  |
| 1561012_at   | -                | -2,262747984 | -2,690860744 | 0,42811276  |  |
| 1563170_at   | -                | -2,262747984 | -2,690860744 | 0,42811276  |  |
| 1563524_a_at | ITPK1-AS1        | -2,262747984 | -2,690860744 | 0,42811276  |  |
| 1570121_at   | ZNF365           | -2,262747984 | -2,690860744 | 0,42811276  |  |
| 1570279_at   | ABCA1            | -2,262747984 | -2,690860744 | 0,42811276  |  |
| 219302_s_at  | CNTNAP2          | -2,262747984 | -2,690860744 | 0,42811276  |  |
| 221683_s_at  | CEP290           | -2,262747984 | -2,690860744 | 0,42811276  |  |
| 234547_at    | -                | -2,262747984 | -2,690860744 | 0,42811276  |  |
| 238242_at    | -                | -2,262747984 | -2,690860744 | 0,42811276  |  |
| 242047_at    | RTKN2            | -2,262747984 | -2,690860744 | 0,42811276  |  |
| 243914_at    | -                | -2,262747984 | -2,690860744 | 0,42811276  |  |
| 243959_at    | -                | -2,262747984 | -2,690860744 | 0,42811276  |  |
| 203178_at    | GATM             | 3,515651309  | 3,087661492  | 0,427989818 |  |
| 1552596_at   | GAS2L2           | 0,291166226  | -0,136643983 | 0,427810208 |  |
| 211820_x_at  | GYPA             | 0,291166226  | -0,136643983 | 0,427810208 |  |
| 243816_at    | ZNF70            | 0,291166226  | -0,136643983 | 0,427810208 |  |
| 230175_s_at  | DCBLD2           | 3,109000457  | 2,681234383  | 0,427766074 |  |
| 228899_at    | -                | 1,119359127  | 0,691645685  | 0,427713442 |  |
| 1555661_at   | OR8D1            | -0,622910612 | -1,050406615 | 0,427496003 |  |
| 1561897_at   | -                | -0,622910612 | -1,050406615 | 0,427496003 |  |
| 207316_at    | HAS1             | -0,622910612 | -1,050406615 | 0,427496003 |  |
| 209167_at    | GPM6B            | -0,622910612 | -1,050406615 | 0,427496003 |  |
| 211897_s_at  | CRHR1            | -0,622910612 | -1,050406615 | 0,427496003 |  |
| 214130_s_at  | LOC728802 /// PI | -0,622910612 | -1,050406615 | 0,427496003 |  |
| 219535_at    | HUNK             | -0,622910612 | -1,050406615 | 0,427496003 |  |
| 234130_at    | LDB3             | -0,622910612 | -1,050406615 | 0,427496003 |  |
| 234584_s_at  | ATE1             | 1,414471577  | 0,987376598  | 0,42709498  |  |
| 204702_s_at  | NFE2L3           | 2,017152618  | 1,590454215  | 0,426698403 |  |
| 1563223_a_at | CENPI            | -2,712026959 | -3,138626879 | 0,42659992  |  |
| 1564250_at   | -                | -2,712026959 | -3,138626879 | 0,42659992  |  |
| 213994_s_at  | SPON1            | -2,712026959 | -3,138626879 | 0,42659992  |  |
| 242221_at    | -                | -2,712026959 | -3,138626879 | 0,42659992  |  |
| 244272_s_at  | TC2N             | -2,712026959 | -3,138626879 | 0,42659992  |  |
| 1556042_s_at | LOC338799        | 1,348276312  | 0,921731975  | 0,426544336 |  |
| 204133_at    | RRP9             | 1,348276312  | 0,921731975  | 0,426544336 |  |
| 208855_s_at  | STK24            | 6,063886117  | 5,637514587  | 0,42637153  |  |
| 227865_at    | IDNK             | 0,103263601  | -0,322870281 | 0,426133883 |  |
| 228677_s_at  | RASAL3           | 0,103263601  | -0,322870281 | 0,426133883 |  |
| 230150_at    | BCAP29           | 0,103263601  | -0,322870281 | 0,426133883 |  |
| 1570523_s_at | ATG10            | 0,401366113  | -0,024572586 | 0,425938699 |  |
| 223285_s_at  | ST6GALNAC4       | 0,401366113  | -0,024572586 | 0,425938699 |  |
| 227162_at    | ZBTB26           | 1,426552034  | 1,000684521  | 0,425867513 |  |
| 236614_at    | LOC729683        | 0,882651021  | 0,456918297  | 0,425732724 |  |
| 221997_s_at  | MRPL52           | 0,648296226  | 0,222599095  | 0,425697131 |  |
| 204872_at    | TLE4             | 0,859074518  | 0,433557298  | 0,42551722  |  |
| 205408_at    | MLLT10           | 1,515954005  | 1,090553537  | 0,425400468 |  |
| 205348_s_at  | DYNC1I1          | -0,221656139 | -0,646746079 | 0,42508994  |  |
| 207836_s_at  | RBPMS            | -0,221656139 | -0,646746079 | 0,42508994  |  |
| 214406_s_at  | SLC7A4           | -0,221656139 | -0,646746079 | 0,42508994  |  |
| 228709_at    | TPR              | -0,221656139 | -0,646746079 | 0,42508994  |  |

|              |              |              |              |             |  |
|--------------|--------------|--------------|--------------|-------------|--|
| 230161_at    | -            | -0,221656139 | -0,646746079 | 0,42508994  |  |
| 238250_at    | -            | -0,221656139 | -0,646746079 | 0,42508994  |  |
| 224595_at    | SLC44A1      | 2,678376417  | 2,253342112  | 0,425034305 |  |
| 220081_x_at  | HSD17B7      | 1,593009234  | 1,16809119   | 0,424918044 |  |
| 226241_s_at  | MRPL52       | 4,746488337  | 4,321571774  | 0,424916562 |  |
| 218943_s_at  | DDX58        | 1,318332599  | 0,893473268  | 0,424859331 |  |
| 228828_at    | BZRAP1-AS1   | 2,470441349  | 2,045615873  | 0,424825476 |  |
| 1558530_at   | LRTM2        | -0,79540287  | -1,220210588 | 0,424807718 |  |
| 1559532_at   | C3orf71      | -0,79540287  | -1,220210588 | 0,424807718 |  |
| 206225_at    | ZNF507       | -0,79540287  | -1,220210588 | 0,424807718 |  |
| 217209_at    | CEACAM3      | -0,79540287  | -1,220210588 | 0,424807718 |  |
| 230424_at    | NREP         | -0,79540287  | -1,220210588 | 0,424807718 |  |
| 234449_at    | -            | -0,79540287  | -1,220210588 | 0,424807718 |  |
| 205371_s_at  | DBT          | 0,533835206  | 0,109221392  | 0,424613814 |  |
| 1554294_s_at | TTBK2        | -2,311268652 | -2,735862426 | 0,424593774 |  |
| 1554842_at   | SLC12A1      | -2,311268652 | -2,735862426 | 0,424593774 |  |
| 1557285_at   | AREGB        | -2,311268652 | -2,735862426 | 0,424593774 |  |
| 1558494_at   | -            | -2,311268652 | -2,735862426 | 0,424593774 |  |
| 1561501_s_at | CTU2         | -2,311268652 | -2,735862426 | 0,424593774 |  |
| 1562440_at   | MAP3K13      | -2,311268652 | -2,735862426 | 0,424593774 |  |
| 1564813_at   | -            | -2,311268652 | -2,735862426 | 0,424593774 |  |
| 205573_s_at  | SNX7         | -2,311268652 | -2,735862426 | 0,424593774 |  |
| 210661_at    | GLRA3        | -2,311268652 | -2,735862426 | 0,424593774 |  |
| 214856_at    | SPTBN1       | -2,311268652 | -2,735862426 | 0,424593774 |  |
| 221411_at    | HOXD12       | -2,311268652 | -2,735862426 | 0,424593774 |  |
| 221530_s_at  | BHLHE41      | -2,311268652 | -2,735862426 | 0,424593774 |  |
| 225664_at    | COL12A1      | -2,311268652 | -2,735862426 | 0,424593774 |  |
| 229816_at    | WDR78        | -2,311268652 | -2,735862426 | 0,424593774 |  |
| 240481_at    | -            | -2,311268652 | -2,735862426 | 0,424593774 |  |
| 1553593_a_at | TAL2         | -0,394749123 | -0,819238336 | 0,424489213 |  |
| 218033_s_at  | SNN          | -0,394749123 | -0,819238336 | 0,424489213 |  |
| 229770_at    | GLT1D1       | -0,394749123 | -0,819238336 | 0,424489213 |  |
| 1552652_at   | HPS4         | 0,735041319  | 0,310717132  | 0,424324187 |  |
| 202482_x_at  | RANBP1       | 0,503742507  | 0,079428135  | 0,424314372 |  |
| 242191_at    | NBPF10       | 0,503742507  | 0,079428135  | 0,424314372 |  |
| 208404_x_at  | KCNJ5        | 0,228146222  | -0,19610998  | 0,424256202 |  |
| 234491_s_at  | SAV1         | 2,109966786  | 1,685812099  | 0,424154687 |  |
| 213287_s_at  | KRT10        | 1,04816921   | 0,624460759  | 0,423708451 |  |
| 229672_at    | UQCC         | 1,04816921   | 0,624460759  | 0,423708451 |  |
| 205303_at    | KCNJ8        | 1,027166904  | 0,603679647  | 0,423487258 |  |
| 228437_at    | CNIH4        | 0,841135803  | 0,417770464  | 0,423365339 |  |
| 226772_s_at  | SAP30L       | -0,112808516 | -0,536087151 | 0,423278634 |  |
| 236518_at    | KIAA1984     | -0,112808516 | -0,536087151 | 0,423278634 |  |
| 238110_at    | PPP6R2       | -0,112808516 | -0,536087151 | 0,423278634 |  |
| 239679_at    | -            | -0,112808516 | -0,536087151 | 0,423278634 |  |
| 242609_x_at  | -            | -0,112808516 | -0,536087151 | 0,423278634 |  |
| 1559514_at   | LOC100132077 | -1,240169874 | -1,663414495 | 0,42324462  |  |
| 1565802_at   | -            | -1,240169874 | -1,663414495 | 0,42324462  |  |
| 1566279_at   | -            | -1,240169874 | -1,663414495 | 0,42324462  |  |
| 1566490_at   | -            | -1,240169874 | -1,663414495 | 0,42324462  |  |
| 1567913_at   | -            | -1,240169874 | -1,663414495 | 0,42324462  |  |
| 216837_at    | EPHA5        | -1,240169874 | -1,663414495 | 0,42324462  |  |
| 221236_s_at  | STMN4        | -1,240169874 | -1,663414495 | 0,42324462  |  |
| 231501_at    | LOC100507162 | -1,240169874 | -1,663414495 | 0,42324462  |  |
| 232239_at    | LOC643529    | -1,240169874 | -1,663414495 | 0,42324462  |  |
| 237355_at    | -            | -1,240169874 | -1,663414495 | 0,42324462  |  |



|              |                  |              |              |             |  |
|--------------|------------------|--------------|--------------|-------------|--|
| 237943_at    | TMCC1            | -1,240169874 | -1,663414495 | 0,42324462  |  |
| 244410_at    | PKHD1            | -1,240169874 | -1,663414495 | 0,42324462  |  |
| 219396_s_at  | MIR631 /// NEIL1 | 0,376672223  | -0,046302147 | 0,42297437  |  |
| 228245_s_at  | LOC100509445 /   | 0,376672223  | -0,046302147 | 0,42297437  |  |
| 243024_at    | ZNF394           | 0,376672223  | -0,046302147 | 0,42297437  |  |
| 222041_at    | DPH1 /// OVCA2   | 1,114389003  | 0,691645685  | 0,422743318 |  |
| 223029_s_at  | TRAF7            | 1,114389003  | 0,691645685  | 0,422743318 |  |
| 221020_s_at  | SLC25A32         | 4,702869182  | 4,2801535    | 0,422715681 |  |
| 202340_x_at  | NR4A1            | 1,094335495  | 0,67181667   | 0,422518825 |  |
| 215266_at    | DNAH3            | 0,072842263  | -0,34958478  | 0,422427043 |  |
| 217285_at    | DGCR14 /// TSS   | 0,072842263  | -0,34958478  | 0,422427043 |  |
| 212968_at    | RFNG             | 0,917308734  | 0,495031851  | 0,422276883 |  |
| 223146_at    | SFT2D3 /// WDR   | 0,917308734  | 0,495031851  | 0,422276883 |  |
| 226174_at    | USP42            | 0,917308734  | 0,495031851  | 0,422276883 |  |
| 212623_at    | TMEM41B          | 4,392357579  | 3,970285709  | 0,42207187  |  |
| 202367_at    | CUX1             | 0,715481152  | 0,293518836  | 0,421962316 |  |
| 223059_s_at  | FAM107B          | 0,715481152  | 0,293518836  | 0,421962316 |  |
| 230435_at    | FAM228B          | 0,715481152  | 0,293518836  | 0,421962316 |  |
| 1566151_at   | -                | 0,03125738   | -0,39061235  | 0,42186973  |  |
| 221663_x_at  | HRH3             | 0,03125738   | -0,39061235  | 0,42186973  |  |
| 229825_at    | PLK3             | 0,03125738   | -0,39061235  | 0,42186973  |  |
| 205249_at    | EGR2             | 1,422536444  | 1,000684521  | 0,421851923 |  |
| 238510_at    | ZNF720           | 2,72965419   | 2,307890888  | 0,421763302 |  |
| 204489_s_at  | CD44             | 2,814842651  | 2,39311332   | 0,421729331 |  |
| 205126_at    | VRK2             | 3,63237684   | 3,210719429  | 0,421657411 |  |
| 1563796_s_at | EARS2            | 1,011212064  | 0,589657387  | 0,421554677 |  |
| 1564109_at   | LOC284865        | 0,480753764  | 0,059218869  | 0,421534895 |  |
| 214423_x_at  | ALDOB            | 0,480753764  | 0,059218869  | 0,421534895 |  |
| 201162_at    | IGFBP7           | 2,227406889  | 1,805902329  | 0,42150456  |  |
| 1559573_at   | LOC100506229     | -2,756478458 | -3,177802286 | 0,421323828 |  |
| 217694_at    | -                | -2,756478458 | -3,177802286 | 0,421323828 |  |
| 220376_at    | LRRC19           | -2,756478458 | -3,177802286 | 0,421323828 |  |
| 220771_at    | LINC00328        | -2,756478458 | -3,177802286 | 0,421323828 |  |
| 224034_at    | -                | -2,756478458 | -3,177802286 | 0,421323828 |  |
| 33778_at     | TBC1D22A         | 2,875587286  | 2,454364686  | 0,4212226   |  |
| 220954_s_at  | PILRB            | 1,238353345  | 0,817300337  | 0,421053008 |  |
| 1554890_a_at | TIA1             | 2,365585359  | 1,944570415  | 0,421014944 |  |
| 40273_at     | SPHK2            | 1,86715234   | 1,44616575   | 0,420986591 |  |
| 212934_at    | UBXN2B           | 2,663141434  | 2,242180416  | 0,420961018 |  |
| 1556941_a_at | LOC283484        | -2,359436556 | -2,780313924 | 0,420877368 |  |
| 1563595_at   | SRGAP3           | -2,359436556 | -2,780313924 | 0,420877368 |  |
| 1564003_at   | -                | -2,359436556 | -2,780313924 | 0,420877368 |  |
| 1569817_at   | -                | -2,359436556 | -2,780313924 | 0,420877368 |  |
| 231523_at    | FGF14            | -2,359436556 | -2,780313924 | 0,420877368 |  |
| 235445_at    | LOC100506092     | -2,359436556 | -2,780313924 | 0,420877368 |  |
| 239273_s_at  | MMP28            | -2,359436556 | -2,780313924 | 0,420877368 |  |
| 241616_at    | -                | -2,359436556 | -2,780313924 | 0,420877368 |  |
| 244235_at    | IVNS1ABP         | -2,359436556 | -2,780313924 | 0,420877368 |  |
| 220473_s_at  | ZCCHC4           | 0,20027154   | -0,220592223 | 0,420863763 |  |
| 207492_at    | NGLY1            | 0,798390451  | 0,377530647  | 0,420859804 |  |
| 1555826_at   | -                | 1,296557217  | 0,876248481  | 0,420308736 |  |
| 230123_at    | NECAP2           | 1,296557217  | 0,876248481  | 0,420308736 |  |
| 205832_at    | CPA4             | 0,57782909   | 0,157549243  | 0,420279848 |  |
| 235045_at    | RBM7             | 0,57782909   | 0,157549243  | 0,420279848 |  |
| 213741_s_at  | KPNA1            | 2,122398022  | 1,702196344  | 0,420201678 |  |
| 204291_at    | LOC100509474 /   | 3,203298287  | 2,783327323  | 0,419970964 |  |

|              |                  |              |              |             |  |
|--------------|------------------|--------------|--------------|-------------|--|
| 212564_at    | KCTD2            | 2,16388051   | 1,743944487  | 0,419936022 |  |
| 1558670_at   | -                | -0,259832361 | -0,679763839 | 0,419931478 |  |
| 1559139_at   | NOC2L            | -0,259832361 | -0,679763839 | 0,419931478 |  |
| 201203_s_at  | RRBP1            | -0,259832361 | -0,679763839 | 0,419931478 |  |
| 226724_s_at  | -                | -0,259832361 | -0,679763839 | 0,419931478 |  |
| 230821_at    | ZNF148           | -0,259832361 | -0,679763839 | 0,419931478 |  |
| 239181_at    | -                | -0,259832361 | -0,679763839 | 0,419931478 |  |
| 243312_at    | -                | -0,259832361 | -0,679763839 | 0,419931478 |  |
| 1570295_at   | -                | -0,59053611  | -1,010192375 | 0,419656265 |  |
| 206530_at    | RAB30            | -0,59053611  | -1,010192375 | 0,419656265 |  |
| 206691_s_at  | PDIA2            | -0,59053611  | -1,010192375 | 0,419656265 |  |
| 211670_x_at  | SSX3             | -0,59053611  | -1,010192375 | 0,419656265 |  |
| 232800_at    | -                | -0,59053611  | -1,010192375 | 0,419656265 |  |
| 237500_at    | -                | -0,59053611  | -1,010192375 | 0,419656265 |  |
| 238046_x_at  | PWWP2B           | -0,59053611  | -1,010192375 | 0,419656265 |  |
| 208820_at    | LOC100653024 /   | 5,168558587  | 4,748914989  | 0,419643598 |  |
| 225329_at    | FAM195B          | 2,808702036  | 2,389070873  | 0,419631162 |  |
| 222646_s_at  | ERO1L            | 3,726584632  | 3,307062282  | 0,419522351 |  |
| 222491_at    | HGSNAT           | 0,317354302  | -0,102100538 | 0,419454839 |  |
| 209037_s_at  | EHD1             | 1,596577845  | 1,177496821  | 0,419081025 |  |
| 221782_at    | DNAJC10          | 2,683419202  | 2,264418116  | 0,419001085 |  |
| 213331_s_at  | NEK1             | 2,084778276  | 1,665902186  | 0,418876091 |  |
| 222587_s_at  | GALNT7           | 2,589836943  | 2,170981159  | 0,418855784 |  |
| 1553400_a_at | C17orf69         | -1,196375121 | -1,615132408 | 0,418757286 |  |
| 1555082_a_at | NEK11            | -1,196375121 | -1,615132408 | 0,418757286 |  |
| 1570106_at   | -                | -1,196375121 | -1,615132408 | 0,418757286 |  |
| 205537_s_at  | VAV2             | -1,196375121 | -1,615132408 | 0,418757286 |  |
| 207529_at    | DEFA5            | -1,196375121 | -1,615132408 | 0,418757286 |  |
| 215220_s_at  | TPR              | -1,196375121 | -1,615132408 | 0,418757286 |  |
| 220621_at    | FOXO3            | -1,196375121 | -1,615132408 | 0,418757286 |  |
| 230646_at    | FNDC5            | -1,196375121 | -1,615132408 | 0,418757286 |  |
| 231518_at    | LOC283867        | -1,196375121 | -1,615132408 | 0,418757286 |  |
| 231757_at    | TAS2R5           | -1,196375121 | -1,615132408 | 0,418757286 |  |
| 232878_at    | LOC644192        | -1,196375121 | -1,615132408 | 0,418757286 |  |
| 236266_at    | RORA             | -1,196375121 | -1,615132408 | 0,418757286 |  |
| 236831_at    | CCDC50           | -1,196375121 | -1,615132408 | 0,418757286 |  |
| 241112_at    | ZNF517           | -1,196375121 | -1,615132408 | 0,418757286 |  |
| 243288_at    | SMYD2            | -1,196375121 | -1,615132408 | 0,418757286 |  |
| 243547_at    | FLJ39639 /// ZNF | -1,196375121 | -1,615132408 | 0,418757286 |  |
| 225481_at    | FRMD6            | 1,283332461  | 0,864649967  | 0,418682493 |  |
| 205934_at    | PLCL1            | 1,64218396   | 1,223626587  | 0,418557373 |  |
| 222382_x_at  | NUP205           | 0,425644434  | 0,007421914  | 0,41822252  |  |
| 231681_x_at  | HIST3H2A         | 0,425644434  | 0,007421914  | 0,41822252  |  |
| 243649_at    | FBXO7            | 0,425644434  | 0,007421914  | 0,41822252  |  |
| 204914_s_at  | SOX11            | -1,543331864 | -1,961547147 | 0,418215283 |  |
| 211022_s_at  | ATRX             | -1,543331864 | -1,961547147 | 0,418215283 |  |
| 224305_s_at  | NPC1L1           | -1,543331864 | -1,961547147 | 0,418215283 |  |
| 229053_at    | SYT17            | -1,543331864 | -1,961547147 | 0,418215283 |  |
| 229463_at    | NTRK2            | -1,543331864 | -1,961547147 | 0,418215283 |  |
| 231591_at    | DMGDH            | -1,543331864 | -1,961547147 | 0,418215283 |  |
| 232113_at    | -                | -1,543331864 | -1,961547147 | 0,418215283 |  |
| 235238_at    | SHC4             | -1,543331864 | -1,961547147 | 0,418215283 |  |
| 237944_at    | -                | -1,543331864 | -1,961547147 | 0,418215283 |  |
| 243365_s_at  | AUTS2            | -1,543331864 | -1,961547147 | 0,418215283 |  |
| 226783_at    | AGXT2L2          | 1,339784194  | 0,921731975  | 0,418052219 |  |
| 1553860_at   | DCST1            | -0,43775896  | -0,855751026 | 0,417992066 |  |

|              |                  |              |              |             |  |
|--------------|------------------|--------------|--------------|-------------|--|
| 208524_at    | GPR15            | -0,43775896  | -0,855751026 | 0,417992066 |  |
| 217511_at    | KAZALD1          | -0,43775896  | -0,855751026 | 0,417992066 |  |
| 222331_at    | -                | -0,43775896  | -0,855751026 | 0,417992066 |  |
| 240233_at    | LOC100506714     | -0,43775896  | -0,855751026 | 0,417992066 |  |
| 200961_at    | SEPHS2           | 5,305414236  | 4,88753743   | 0,417876806 |  |
| 208869_s_at  | GABARAPL1        | -0,00073712  | -0,41858459  | 0,417847469 |  |
| 229107_at    | -                | -0,00073712  | -0,41858459  | 0,417847469 |  |
| 237793_at    | C20orf78         | -0,00073712  | -0,41858459  | 0,417847469 |  |
| 1568799_at   | -                | -0,196756757 | -0,614371577 | 0,41761482  |  |
| 207339_s_at  | LTB              | -0,196756757 | -0,614371577 | 0,41761482  |  |
| 235611_at    | SREK1            | -0,196756757 | -0,614371577 | 0,41761482  |  |
| 236683_at    | -                | -0,196756757 | -0,614371577 | 0,41761482  |  |
| 212838_at    | DNMBP            | 1,795990708  | 1,378453643  | 0,417537064 |  |
| 1559638_at   | C1orf200         | 1,394109935  | 0,976641161  | 0,417468774 |  |
| 221973_at    | LOC100506076 /   | 1,089278259  | 0,67181667   | 0,417461589 |  |
| 212515_s_at  | DDX3X            | 5,499701558  | 5,082250729  | 0,417450829 |  |
| 219500_at    | CLCF1            | 0,810733188  | 0,393761504  | 0,416971683 |  |
| 220666_at    | -                | -2,930741289 | -3,347710726 | 0,416969437 |  |
| 203004_s_at  | MEF2D            | 0,133056859  | -0,283667828 | 0,416724686 |  |
| 214256_at    | ATP10A           | 0,133056859  | -0,283667828 | 0,416724686 |  |
| 214353_at    | -                | 0,133056859  | -0,283667828 | 0,416724686 |  |
| 219023_at    | AP1AR            | 2,559073676  | 2,14244844   | 0,416625237 |  |
| 223535_at    | NUDT12           | 1,496984567  | 1,080561626  | 0,416422941 |  |
| 203433_at    | MTHFS /// ST20-  | 2,713311265  | 2,297144887  | 0,416166379 |  |
| 212836_at    | POLD3            | 2,206540699  | 1,790660532  | 0,415880167 |  |
| 243252_at    | -                | 0,984222186  | 0,568365095  | 0,41585709  |  |
| 1569098_s_at | TP53BP1          | 0,592200562  | 0,176436073  | 0,415764488 |  |
| 207072_at    | IL18RAP          | 0,592200562  | 0,176436073  | 0,415764488 |  |
| 214216_s_at  | LARP4B           | 0,592200562  | 0,176436073  | 0,415764488 |  |
| 215887_at    | ZNF277           | 0,592200562  | 0,176436073  | 0,415764488 |  |
| 228293_at    | DEPDC7           | 2,197169074  | 1,781437557  | 0,415731517 |  |
| 222428_s_at  | LARS             | 5,256624694  | 4,840945211  | 0,415679483 |  |
| 216450_x_at  | HSP90B1          | 2,782308844  | 2,366632651  | 0,415676193 |  |
| 1569879_a_at | MEGF11           | 0,255492549  | -0,160136748 | 0,415629298 |  |
| 216845_x_at  | MLL2             | 0,255492549  | -0,160136748 | 0,415629298 |  |
| 228486_at    | SLC44A1          | 0,255492549  | -0,160136748 | 0,415629298 |  |
| 232041_at    | INADL            | 0,255492549  | -0,160136748 | 0,415629298 |  |
| 238493_at    | ZNF506           | 1,865674241  | 1,450051551  | 0,41562269  |  |
| 242994_at    | -                | 1,073999308  | 0,658444279  | 0,415555029 |  |
| 202737_s_at  | LSM4             | 4,730742086  | 4,31519468   | 0,415547406 |  |
| 242760_x_at  | PIGB             | 1,348276312  | 0,932882274  | 0,415394038 |  |
| 1567069_at   | OR4D1            | -0,496991414 | -0,912331589 | 0,415340175 |  |
| 208058_s_at  | MGAT3            | -0,496991414 | -0,912331589 | 0,415340175 |  |
| 228236_at    | SLC52A3          | -0,496991414 | -0,912331589 | 0,415340175 |  |
| 230965_at    | USP2             | -0,496991414 | -0,912331589 | 0,415340175 |  |
| 236209_at    | -                | -0,496991414 | -0,912331589 | 0,415340175 |  |
| 244710_at    | LRGUK            | -0,496991414 | -0,912331589 | 0,415340175 |  |
| 213552_at    | GLCE             | 1,05337236   | 0,638150376  | 0,415221983 |  |
| 215067_x_at  | PRDX2            | 1,05337236   | 0,638150376  | 0,415221983 |  |
| 213296_at    | RER1             | 1,709647566  | 1,294497133  | 0,415150433 |  |
| 217299_s_at  | NBN              | 2,294858597  | 1,879785595  | 0,415073002 |  |
| 1560327_at   | -                | 1,40228911   | 0,987376598  | 0,414912512 |  |
| 213090_s_at  | MIR1257 /// TAF4 | 3,123915073  | 2,709065209  | 0,414849863 |  |
| 218101_s_at  | NDUFC2 /// NDU   | 6,13991327   | 5,725205755  | 0,414707514 |  |
| 229390_at    | FAM26F           | 1,201332287  | 0,786897721  | 0,414434565 |  |
| 1552582_at   | ABCC13           | -2,43257096  | -2,847001814 | 0,414430854 |  |

|              |                 |              |              |             |  |
|--------------|-----------------|--------------|--------------|-------------|--|
| 1554161_at   | SLC25A27        | -2,43257096  | -2,847001814 | 0,414430854 |  |
| 1555457_at   | DBC1            | -2,43257096  | -2,847001814 | 0,414430854 |  |
| 1557869_at   | -               | -2,43257096  | -2,847001814 | 0,414430854 |  |
| 1569545_at   | -               | -2,43257096  | -2,847001814 | 0,414430854 |  |
| 206142_at    | ZNF135          | -2,43257096  | -2,847001814 | 0,414430854 |  |
| 211109_at    | JAK3            | -2,43257096  | -2,847001814 | 0,414430854 |  |
| 214618_at    | CFLAR           | -2,43257096  | -2,847001814 | 0,414430854 |  |
| 219682_s_at  | TBX3            | -2,43257096  | -2,847001814 | 0,414430854 |  |
| 220552_at    | TRPC5           | -2,43257096  | -2,847001814 | 0,414430854 |  |
| 223278_at    | GJB2            | -2,43257096  | -2,847001814 | 0,414430854 |  |
| 226189_at    | ITGB8           | -2,43257096  | -2,847001814 | 0,414430854 |  |
| 236287_at    | -               | -2,43257096  | -2,847001814 | 0,414430854 |  |
| 237054_at    | ENPP5           | -2,43257096  | -2,847001814 | 0,414430854 |  |
| 219183_s_at  | CYTH4           | 0,767063567  | 0,352836757  | 0,41422681  |  |
| 1555505_a_at | TYR             | -2,089474779 | -2,503677622 | 0,414202843 |  |
| 1557821_at   | LOC283547       | -2,089474779 | -2,503677622 | 0,414202843 |  |
| 1561249_a_at | DNM1P35         | -2,089474779 | -2,503677622 | 0,414202843 |  |
| 1561251_at   | LOC285577       | -2,089474779 | -2,503677622 | 0,414202843 |  |
| 202435_s_at  | CYP1B1          | -2,089474779 | -2,503677622 | 0,414202843 |  |
| 215935_at    | FAM75A1 /// FAM | -2,089474779 | -2,503677622 | 0,414202843 |  |
| 220230_s_at  | CYB5R2          | -2,089474779 | -2,503677622 | 0,414202843 |  |
| 222043_at    | CLU             | -2,089474779 | -2,503677622 | 0,414202843 |  |
| 224044_at    | RHOT1           | -2,089474779 | -2,503677622 | 0,414202843 |  |
| 231214_at    | -               | -2,089474779 | -2,503677622 | 0,414202843 |  |
| 231557_at    | -               | -2,089474779 | -2,503677622 | 0,414202843 |  |
| 244513_at    | TMEM161B        | -2,089474779 | -2,503677622 | 0,414202843 |  |
| 227118_s_at  | MRPS26          | 0,334552598  | -0,079522948 | 0,414075546 |  |
| 242247_at    | METTL15         | 0,334552598  | -0,079522948 | 0,414075546 |  |
| 202571_s_at  | DLGAP4          | 0,87091093   | 0,456918297  | 0,413992633 |  |
| 218254_s_at  | SAR1B           | 4,053102157  | 3,639498476  | 0,413603681 |  |
| 230298_at    | MBLAC2          | 2,59162628   | 2,17802703   | 0,41359925  |  |
| 219609_at    | WDR25           | 0,945567441  | 0,532164371  | 0,413403071 |  |
| 1555611_s_at | MBD1            | 1,037706275  | 0,624460759  | 0,413245516 |  |
| 231212_x_at  | -               | 1,037706275  | 0,624460759  | 0,413245516 |  |
| 228052_x_at  | TCF3            | 0,44160593   | 0,028364014  | 0,413241916 |  |
| 1562664_at   | LOC286009       | -0,741668563 | -1,154897679 | 0,413229116 |  |
| 217411_s_at  | RREB1           | -0,741668563 | -1,154897679 | 0,413229116 |  |
| 228016_s_at  | -               | -0,741668563 | -1,154897679 | 0,413229116 |  |
| 231162_at    | CLDND2          | -0,741668563 | -1,154897679 | 0,413229116 |  |
| 236788_at    | -               | -0,741668563 | -1,154897679 | 0,413229116 |  |
| 240595_at    | -               | -0,741668563 | -1,154897679 | 0,413229116 |  |
| 242049_s_at  | NBAS            | -0,741668563 | -1,154897679 | 0,413229116 |  |
| 226467_at    | TMCO7           | 1,659347917  | 1,246149888  | 0,413198029 |  |
| 220865_s_at  | PDSS1           | 3,097712429  | 2,684536601  | 0,413175828 |  |
| 1559926_at   | LOC728353       | -0,85085127  | -1,264005341 | 0,413154071 |  |
| 205440_s_at  | NPY1R           | -0,85085127  | -1,264005341 | 0,413154071 |  |
| 206433_s_at  | SPOCK3          | -0,85085127  | -1,264005341 | 0,413154071 |  |
| 206916_x_at  | TAT             | -0,85085127  | -1,264005341 | 0,413154071 |  |
| 211803_at    | CDK2            | -0,85085127  | -1,264005341 | 0,413154071 |  |
| 211848_s_at  | CEACAM7         | -0,85085127  | -1,264005341 | 0,413154071 |  |
| 212258_s_at  | SMARCA2         | -0,85085127  | -1,264005341 | 0,413154071 |  |
| 213060_s_at  | CHI3L2          | -0,85085127  | -1,264005341 | 0,413154071 |  |
| 215415_s_at  | LYST            | -0,85085127  | -1,264005341 | 0,413154071 |  |
| 224454_at    | ETNK1           | -0,85085127  | -1,264005341 | 0,413154071 |  |
| 231562_at    | APOC2           | -0,85085127  | -1,264005341 | 0,413154071 |  |
| 233890_at    | -               | -0,85085127  | -1,264005341 | 0,413154071 |  |

|              |                  |              |              |             |  |
|--------------|------------------|--------------|--------------|-------------|--|
| 202518_at    | BCL7B            | 2,458724341  | 2,045615873  | 0,413108468 |  |
| 222586_s_at  | OSBPL11          | 1,373456798  | 0,960386719  | 0,413070079 |  |
| 212958_x_at  | PAM              | 4,340094954  | 3,927027853  | 0,413067101 |  |
| 218641_at    | C11orf95         | 2,491678455  | 2,078620836  | 0,41305762  |  |
| 227193_at    | SLC30A4          | 0,57058931   | 0,157549243  | 0,413040067 |  |
| 205003_at    | DOCK4            | 1,442503549  | 1,029536893  | 0,412966655 |  |
| 1558828_s_at | -                | -2,823166348 | -3,236070201 | 0,412903853 |  |
| 207869_s_at  | CACNA1G          | -2,823166348 | -3,236070201 | 0,412903853 |  |
| 216533_at    | PCCA             | -2,823166348 | -3,236070201 | 0,412903853 |  |
| 215845_x_at  | -                | 1,426552034  | 1,013870809  | 0,412681225 |  |
| 225397_at    | C15orf57         | 1,426552034  | 1,013870809  | 0,412681225 |  |
| 1555288_s_at | FBF1             | -0,078265071 | -0,490927335 | 0,412662264 |  |
| 228758_at    | BCL6             | -0,078265071 | -0,490927335 | 0,412662264 |  |
| 233496_s_at  | CFL2             | -0,078265071 | -0,490927335 | 0,412662264 |  |
| 1553466_at   | CXorf59          | -0,352951799 | -0,765504029 | 0,41255223  |  |
| 1568781_at   | -                | -0,352951799 | -0,765504029 | 0,41255223  |  |
| 203901_at    | TAB1             | -0,352951799 | -0,765504029 | 0,41255223  |  |
| 223508_at    | NOTCH1           | -0,352951799 | -0,765504029 | 0,41255223  |  |
| 232670_at    | -                | -0,352951799 | -0,765504029 | 0,41255223  |  |
| 213926_s_at  | AGFG1            | 1,556829052  | 1,144305291  | 0,412523761 |  |
| 228389_at    | -                | 0,541261317  | 0,128747141  | 0,412514176 |  |
| 1554973_a_at | ZBTB26           | -0,234278768 | -0,646746079 | 0,412467311 |  |
| 1561542_at   | -                | -0,234278768 | -0,646746079 | 0,412467311 |  |
| 204861_s_at  | LOC100509323 /   | -0,234278768 | -0,646746079 | 0,412467311 |  |
| 207609_s_at  | CYP1A2           | -0,234278768 | -0,646746079 | 0,412467311 |  |
| 214783_s_at  | ANXA11           | -0,234278768 | -0,646746079 | 0,412467311 |  |
| 220389_at    | CCDC81           | -0,234278768 | -0,646746079 | 0,412467311 |  |
| 226613_at    | GATSL3           | -0,234278768 | -0,646746079 | 0,412467311 |  |
| 229605_at    | CYB5RL           | -0,234278768 | -0,646746079 | 0,412467311 |  |
| 238126_at    | RSBN1L-AS1       | -0,234278768 | -0,646746079 | 0,412467311 |  |
| 222462_s_at  | BACE1            | 1,542099044  | 1,129843209  | 0,412255835 |  |
| 201823_s_at  | RNF14            | 3,58196103   | 3,170070041  | 0,411890989 |  |
| 225754_at    | AP1G1            | 2,361396186  | 1,950068772  | 0,411327414 |  |
| 223946_at    | MED23            | 0,020670649  | -0,39061235  | 0,411283    |  |
| 226484_at    | ZBTB47           | 0,020670649  | -0,39061235  | 0,411283    |  |
| 233918_at    | DCDC2B           | 0,020670649  | -0,39061235  | 0,411283    |  |
| 238911_at    | STARD10          | 0,020670649  | -0,39061235  | 0,411283    |  |
| 221108_at    | C22orf43         | 0,82905153   | 0,417770464  | 0,411281067 |  |
| 212047_s_at  | RNF167           | 2,987866617  | 2,576704359  | 0,411162257 |  |
| 1557697_at   | -                | -1,131062212 | -1,541908042 | 0,410845829 |  |
| 1558517_s_at | LRRC8C           | -1,131062212 | -1,541908042 | 0,410845829 |  |
| 1562326_at   | FLJ30838         | -1,131062212 | -1,541908042 | 0,410845829 |  |
| 1566728_at   | -                | -1,131062212 | -1,541908042 | 0,410845829 |  |
| 201506_at    | LOC100652886 /   | -1,131062212 | -1,541908042 | 0,410845829 |  |
| 206286_s_at  | TDGF1 /// TDGF   | -1,131062212 | -1,541908042 | 0,410845829 |  |
| 206367_at    | REN              | -1,131062212 | -1,541908042 | 0,410845829 |  |
| 208584_at    | SNCG             | -1,131062212 | -1,541908042 | 0,410845829 |  |
| 213697_at    | HIPK3            | -1,131062212 | -1,541908042 | 0,410845829 |  |
| 216798_at    | FLJ23519 /// RNH | -1,131062212 | -1,541908042 | 0,410845829 |  |
| 217128_s_at  | CAMK1G           | -1,131062212 | -1,541908042 | 0,410845829 |  |
| 231055_at    | -                | -1,131062212 | -1,541908042 | 0,410845829 |  |
| 231791_at    | ASAH2B           | -1,131062212 | -1,541908042 | 0,410845829 |  |
| 232449_at    | BCO2             | -1,131062212 | -1,541908042 | 0,410845829 |  |
| 236118_at    | LOC100128893     | -1,131062212 | -1,541908042 | 0,410845829 |  |
| 52285_f_at   | CEP76            | 3,292359144  | 2,881550906  | 0,410808238 |  |
| 225587_at    | TMEM129          | 0,30867765   | -0,102100538 | 0,410778187 |  |

|              |                 |              |              |             |  |
|--------------|-----------------|--------------|--------------|-------------|--|
| 240793_at    | TTN             | 0,30867765   | -0,102100538 | 0,410778187 |  |
| 1553062_at   | MOGAT1          | 0,152582607  | -0,258114234 | 0,410696841 |  |
| 214300_s_at  | TOP3A           | 0,152582607  | -0,258114234 | 0,410696841 |  |
| 214759_at    | WTAP            | 0,152582607  | -0,258114234 | 0,410696841 |  |
| 200762_at    | DPYSL2          | 4,553887643  | 4,143455947  | 0,410431696 |  |
| 1556812_a_at | -               | -2,479842156 | -2,89013181  | 0,410289654 |  |
| 1559018_at   | PTPRE           | -2,479842156 | -2,89013181  | 0,410289654 |  |
| 1566843_at   | PER4            | -2,479842156 | -2,89013181  | 0,410289654 |  |
| 1567304_at   | -               | -2,479842156 | -2,89013181  | 0,410289654 |  |
| 1570152_at   | -               | -2,479842156 | -2,89013181  | 0,410289654 |  |
| 207424_at    | MYF5            | -2,479842156 | -2,89013181  | 0,410289654 |  |
| 216590_at    | GNAT3           | -2,479842156 | -2,89013181  | 0,410289654 |  |
| 217589_at    | RAB40A          | -2,479842156 | -2,89013181  | 0,410289654 |  |
| 229823_at    | RIMS2           | -2,479842156 | -2,89013181  | 0,410289654 |  |
| 234330_at    | -               | -2,479842156 | -2,89013181  | 0,410289654 |  |
| 234510_at    | -               | -2,479842156 | -2,89013181  | 0,410289654 |  |
| 237812_at    | -               | -2,479842156 | -2,89013181  | 0,410289654 |  |
| 243060_at    | LOC100505835    | -2,479842156 | -2,89013181  | 0,410289654 |  |
| 1553106_at   | C5orf24         | 0,273439642  | -0,136643983 | 0,410083625 |  |
| 215099_s_at  | RXRΒ            | 0,273439642  | -0,136643983 | 0,410083625 |  |
| 229645_at    | FAM69C          | 0,273439642  | -0,136643983 | 0,410083625 |  |
| 236270_at    | NFATC4          | 0,273439642  | -0,136643983 | 0,410083625 |  |
| 219174_at    | IFT74           | 1,726031811  | 1,315948728  | 0,410083082 |  |
| 219555_s_at  | CENPN           | 4,373240364  | 3,963505394  | 0,40973497  |  |
| 1555380_at   | ADAMTS4         | 0,518867317  | 0,109221392  | 0,409645925 |  |
| 229349_at    | LIN28B          | 5,17304712   | 4,763431224  | 0,409615896 |  |
| 238973_s_at  | TSNAX           | 0,384950573  | -0,024572586 | 0,40952316  |  |
| 213513_x_at  | ARPC2           | 5,124433928  | 4,715003086  | 0,409430842 |  |
| 201653_at    | CNIH            | 6,191486349  | 5,78209163   | 0,40939472  |  |
| 1558164_s_at | PEX13           | 0,613492853  | 0,204310755  | 0,409182098 |  |
| 222111_at    | FAM63B          | 1,314003737  | 0,904843258  | 0,409160478 |  |
| 237465_at    | USP53           | 0,702292136  | 0,293518836  | 0,408773301 |  |
| 1554464_a_at | CRTAP /// LOC10 | 2,688444421  | 2,27978304   | 0,408661381 |  |
| 218989_x_at  | SLC30A5         | 3,857278636  | 3,448769219  | 0,408509417 |  |
| 223346_at    | VPS18           | 1,58584542   | 1,177496821  | 0,4083486   |  |
| 212322_at    | SGPL1           | 1,523472489  | 1,115234684  | 0,408237805 |  |
| 206338_at    | ELAVL3          | -0,543051993 | -0,950686014 | 0,407634021 |  |
| 236406_at    | ZNF324B         | -0,543051993 | -0,950686014 | 0,407634021 |  |
| 237027_at    | LSAMP-AS1       | -0,543051993 | -0,950686014 | 0,407634021 |  |
| 241362_at    | SOGA1           | -0,543051993 | -0,950686014 | 0,407634021 |  |
| 206528_at    | TRPC6           | -2,866296344 | -3,273861381 | 0,407565037 |  |
| 236179_at    | CDH11           | -2,866296344 | -3,273861381 | 0,407565037 |  |
| 214500_at    | H2AFY           | 1,163336153  | 0,755840599  | 0,407495554 |  |
| 219125_s_at  | SLC50A1         | 2,338135744  | 1,930732138  | 0,407403606 |  |
| 215541_s_at  | DIAPH1          | 2,427005622  | 2,019703483  | 0,407302139 |  |
| 223793_at    | PRRC2B          | 1,079110292  | 0,67181667   | 0,407293622 |  |
| 223418_x_at  | ANKRD13C        | 2,452829957  | 2,045615873  | 0,407214084 |  |
| 201873_s_at  | ABCE1           | 4,914950325  | 4,507854821  | 0,407095503 |  |
| 210892_s_at  | GTF2I           | 1,575032557  | 1,16809119   | 0,406941366 |  |
| 1557246_at   | KIDINS220       | 0,123193849  | -0,283667828 | 0,406861677 |  |
| 206885_x_at  | GH1             | 0,123193849  | -0,283667828 | 0,406861677 |  |
| 216934_at    | -               | 0,123193849  | -0,283667828 | 0,406861677 |  |
| 243138_at    | -               | 0,123193849  | -0,283667828 | 0,406861677 |  |
| 203362_s_at  | MAD2L1          | 5,721829387  | 5,315121782  | 0,406707606 |  |
| 222273_at    | PAPOLG          | 1,607231019  | 1,200746069  | 0,40648495  |  |
| 222849_s_at  | SCRN3           | 2,637386731  | 2,230931691  | 0,40645504  |  |

|              |                  |              |              |             |  |
|--------------|------------------|--------------|--------------|-------------|--|
| 1565731_at   | ALDH3B1          | 1,496984567  | 1,090553537  | 0,40643103  |  |
| 220894_x_at  | PRDM12           | 0,359971644  | -0,046302147 | 0,406273791 |  |
| 223790_at    | KATNAL1          | 0,359971644  | -0,046302147 | 0,406273791 |  |
| 235375_x_at  | TTC9B            | 0,359971644  | -0,046302147 | 0,406273791 |  |
| 215483_at    | AKAP9            | 0,46522187   | 0,059218869  | 0,406003002 |  |
| 235679_at    | -                | 0,46522187   | 0,059218869  | 0,406003002 |  |
| 1554512_a_at | CEP89            | 0,083054335  | -0,322870281 | 0,405924616 |  |
| 1566457_at   | -                | -0,706943342 | -1,112851844 | 0,405908502 |  |
| 204043_at    | TCN2             | -0,706943342 | -1,112851844 | 0,405908502 |  |
| 212122_at    | RHOQ             | -0,706943342 | -1,112851844 | 0,405908502 |  |
| 220888_s_at  | CASS4            | -0,706943342 | -1,112851844 | 0,405908502 |  |
| 221272_s_at  | C1orf21          | -0,706943342 | -1,112851844 | 0,405908502 |  |
| 223958_s_at  | DNAL1            | -0,706943342 | -1,112851844 | 0,405908502 |  |
| 234386_s_at  | -                | -0,706943342 | -1,112851844 | 0,405908502 |  |
| 203958_s_at  | ZBTB40           | -0,055687482 | -0,461594427 | 0,405906945 |  |
| 221355_at    | CHRNA            | -0,055687482 | -0,461594427 | 0,405906945 |  |
| 227191_at    | ITFG1            | -0,055687482 | -0,461594427 | 0,405906945 |  |
| 239824_s_at  | TMEM107          | -0,055687482 | -0,461594427 | 0,405906945 |  |
| 61734_at     | RCN3             | 0,343075573  | -0,062816928 | 0,405892501 |  |
| 205241_at    | SCO2             | 4,056345228  | 3,650516168  | 0,405829061 |  |
| 201504_s_at  | TSN              | 3,559280583  | 3,153484076  | 0,405796508 |  |
| 213188_s_at  | MINA             | 2,940912947  | 2,53523821   | 0,405674737 |  |
| 1556154_a_at | MGC23284         | -1,089016378 | -1,494668682 | 0,405652304 |  |
| 1557540_at   | LOC100507403     | -1,089016378 | -1,494668682 | 0,405652304 |  |
| 1562392_at   | MRPL23           | -1,089016378 | -1,494668682 | 0,405652304 |  |
| 1568601_at   | GAD2             | -1,089016378 | -1,494668682 | 0,405652304 |  |
| 205940_at    | MYH3             | -1,089016378 | -1,494668682 | 0,405652304 |  |
| 206776_x_at  | ACRV1            | -1,089016378 | -1,494668682 | 0,405652304 |  |
| 210103_s_at  | FOXA2            | -1,089016378 | -1,494668682 | 0,405652304 |  |
| 211020_at    | GCNT2            | -1,089016378 | -1,494668682 | 0,405652304 |  |
| 220354_at    | MCF2L-AS1        | -1,089016378 | -1,494668682 | 0,405652304 |  |
| 222004_s_at  | DOCK6            | -1,089016378 | -1,494668682 | 0,405652304 |  |
| 233374_at    | -                | -1,089016378 | -1,494668682 | 0,405652304 |  |
| 233664_at    | -                | -1,089016378 | -1,494668682 | 0,405652304 |  |
| 241521_at    | LOC100507652     | -1,089016378 | -1,494668682 | 0,405652304 |  |
| 243134_at    | -                | -1,089016378 | -1,494668682 | 0,405652304 |  |
| 242470_at    | EID2B            | 1,326951551  | 0,921731975  | 0,405219575 |  |
| 222149_x_at  | GOLGA8C /// GC   | 0,822971223  | 0,417770464  | 0,40520076  |  |
| 212594_at    | MIR4680 /// PDC  | 1,874520207  | 1,469325098  | 0,405195109 |  |
| 1552343_s_at | PDE7A            | -0,926850548 | -1,332017329 | 0,405166781 |  |
| 202765_s_at  | FBN1             | -0,926850548 | -1,332017329 | 0,405166781 |  |
| 205058_at    | SLC26A1          | -0,926850548 | -1,332017329 | 0,405166781 |  |
| 207690_at    | ALX3             | -0,926850548 | -1,332017329 | 0,405166781 |  |
| 220038_at    | C8orf44-SGK3 /// | -0,926850548 | -1,332017329 | 0,405166781 |  |
| 220472_at    | ZCCHC4           | -0,926850548 | -1,332017329 | 0,405166781 |  |
| 1555977_at   | MYL12A           | 0,900083947  | 0,495031851  | 0,405052097 |  |
| 1568683_at   | MGC23284         | -0,325749314 | -0,730778808 | 0,405029494 |  |
| 219554_at    | RHCG             | -0,325749314 | -0,730778808 | 0,405029494 |  |
| 223409_at    | -                | -0,325749314 | -0,730778808 | 0,405029494 |  |
| 223715_at    | BRSK2            | -0,325749314 | -0,730778808 | 0,405029494 |  |
| 242214_at    | RPS27A           | 1,64218396   | 1,23718272   | 0,405001241 |  |
| 220968_s_at  | TSPAN9           | 1,251994932  | 0,847075464  | 0,404919469 |  |
| 202459_s_at  | LPIN2            | 0,97328325   | 0,568365095  | 0,404918155 |  |
| 201963_at    | ACSL1            | 0,627515113  | 0,222599095  | 0,404916018 |  |
| 212846_at    | RRP1B            | 6,720728761  | 6,315817527  | 0,404911234 |  |
| 228543_at    | PET117           | 3,214953914  | 2,810785576  | 0,404168338 |  |

|              |                 |              |              |             |  |
|--------------|-----------------|--------------|--------------|-------------|--|
| 227278_at    | TAF13           | 5,088452866  | 4,684404159  | 0,404048707 |  |
| 232235_at    | DSEL            | 1,865674241  | 1,461646549  | 0,404027692 |  |
| 227801_at    | TRIM59          | 3,434229569  | 3,030417996  | 0,403811573 |  |
| 1558626_at   | -               | -2,551294263 | -2,954576755 | 0,403282492 |  |
| 1560517_s_at | -               | -2,551294263 | -2,954576755 | 0,403282492 |  |
| 219196_at    | SCG3            | -2,551294263 | -2,954576755 | 0,403282492 |  |
| 229281_at    | NPAS3           | -2,551294263 | -2,954576755 | 0,403282492 |  |
| 232905_at    | GTF2H5          | -2,551294263 | -2,954576755 | 0,403282492 |  |
| 226635_at    | LOC100506710    | 4,608815095  | 4,205686812  | 0,403128283 |  |
| 233810_x_at  | -               | 1,296557217  | 0,893473268  | 0,403083949 |  |
| 219384_s_at  | ADAT1           | 1,352503698  | 0,949447784  | 0,403055915 |  |
| 212990_at    | SYNJ1           | 2,325288363  | 1,922365006  | 0,402923357 |  |
| 1558027_s_at | PRKAB2          | 0,95671774   | 0,553993624  | 0,402724116 |  |
| 235057_at    | ITCH            | 1,027166904  | 0,624460759  | 0,402706145 |  |
| 1554351_a_at | TIPRL           | 3,316904202  | 2,914267328  | 0,402636874 |  |
| 204729_s_at  | STX1A           | 1,442503549  | 1,039887232  | 0,402616317 |  |
| 1556207_a_at | LOC100652856    | -2,908843709 | -3,311072652 | 0,402228943 |  |
| 210196_s_at  | PSG1            | -2,908843709 | -3,311072652 | 0,402228943 |  |
| 1556136_at   | MYLK4           | 1,139070151  | 0,73688026   | 0,40218989  |  |
| 223347_at    | MUM1            | 0,859074518  | 0,456918297  | 0,402156221 |  |
| 229007_at    | LOC283788       | 0,779676066  | 0,377530647  | 0,402145419 |  |
| 211527_x_at  | VEGFA           | 0,695652136  | 0,293518836  | 0,402133301 |  |
| 226530_at    | BMF             | 0,695652136  | 0,293518836  | 0,402133301 |  |
| 1553688_at   | METTL6          | 0,181384709  | -0,220592223 | 0,401976933 |  |
| 215088_s_at  | SDHC            | 3,595400101  | 3,193438316  | 0,401961785 |  |
| 228062_at    | NAP1L5          | 1,780386218  | 1,378453643  | 0,401932575 |  |
| 207319_s_at  | CDK13           | 0,052199481  | -0,34958478  | 0,401784261 |  |
| 210693_at    | SPPL2B          | 0,052199481  | -0,34958478  | 0,401784261 |  |
| 219705_at    | QSER1           | 0,052199481  | -0,34958478  | 0,401784261 |  |
| 232234_at    | SLA2            | 0,052199481  | -0,34958478  | 0,401784261 |  |
| 1554679_a_at | LAPTM4B         | 5,37095686   | 4,96934727   | 0,40160959  |  |
| 218944_at    | PYCRL           | 0,57782909   | 0,176436073  | 0,401393017 |  |
| 235713_at    | ALKBH8          | 0,57782909   | 0,176436073  | 0,401393017 |  |
| 223358_s_at  | PDE7A           | 2,446911392  | 2,045615873  | 0,401295519 |  |
| 1553947_at   | EXOSC6          | 2,874852734  | 2,473581079  | 0,401271655 |  |
| 208309_s_at  | MALT1           | 0,376672223  | -0,024572586 | 0,40124481  |  |
| 210577_at    | CASR            | 0,376672223  | -0,024572586 | 0,40124481  |  |
| 230617_at    | LOC100507675    | 0,376672223  | -0,024572586 | 0,40124481  |  |
| 1564336_at   | -               | -0,089689931 | -0,490927335 | 0,401237404 |  |
| 207123_s_at  | MATN4           | -0,089689931 | -0,490927335 | 0,401237404 |  |
| 232880_at    | -               | -0,089689931 | -0,490927335 | 0,401237404 |  |
| 216689_x_at  | ARHGAP1         | 1,515954005  | 1,115234684  | 0,400719321 |  |
| 222631_at    | LOC285540 /// P | 2,889473182  | 2,488772006  | 0,400701176 |  |
| 234405_s_at  | PHAX            | 2,516380342  | 2,115788273  | 0,400592069 |  |
| 1554428_s_at | NLGN2           | 1,360921491  | 0,960386719  | 0,400534772 |  |
| 222811_at    | FTSJD1          | 2,864529541  | 2,464004877  | 0,400524664 |  |
| 223380_s_at  | LATS2           | 1,305306849  | 0,904843258  | 0,400463591 |  |
| 201366_at    | ANXA7           | 4,286420174  | 3,886022844  | 0,40039733  |  |
| 205491_s_at  | GJB3            | -0,512251684 | -0,912331589 | 0,400079904 |  |
| 208862_s_at  | CTNND1 /// TMX  | -0,512251684 | -0,912331589 | 0,400079904 |  |
| 213896_x_at  | FAM149B1        | -0,512251684 | -0,912331589 | 0,400079904 |  |
| 214137_at    | PTPRJ           | -0,512251684 | -0,912331589 | 0,400079904 |  |
| 218390_s_at  | FAM204A         | -0,512251684 | -0,912331589 | 0,400079904 |  |
| 227953_at    | CMTM6           | -0,512251684 | -0,912331589 | 0,400079904 |  |
| 244000_at    | -               | -0,512251684 | -0,912331589 | 0,400079904 |  |
| 210790_s_at  | SAR1A           | 2,582657321  | 2,182705233  | 0,399952088 |  |



|              |              |              |              |             |  |
|--------------|--------------|--------------|--------------|-------------|--|
| 202184_s_at  | NUP133       | 4,198742362  | 3,798818761  | 0,399923602 |  |
| 207765_s_at  | FAM214B      | 0,917308734  | 0,51742585   | 0,399882884 |  |
| 221646_s_at  | ZDHC11       | -0,136301282 | -0,536087151 | 0,399785869 |  |
| 231117_at    | FAM181A      | -0,136301282 | -0,536087151 | 0,399785869 |  |
| 236802_at    | -            | -0,136301282 | -0,536087151 | 0,399785869 |  |
| 239281_at    | ZDHC14       | -0,136301282 | -0,536087151 | 0,399785869 |  |
| 242911_at    | MED13L       | -0,136301282 | -0,536087151 | 0,399785869 |  |
| 203989_x_at  | F2R          | 5,136741656  | 4,737036893  | 0,399704763 |  |
| 1555985_at   | C17orf64     | -1,763254337 | -2,162639771 | 0,399385434 |  |
| 1560014_s_at | PDXDC1       | -1,763254337 | -2,162639771 | 0,399385434 |  |
| 1560162_at   | FLJ40606     | -1,763254337 | -2,162639771 | 0,399385434 |  |
| 1560276_at   | LOC283403    | -1,763254337 | -2,162639771 | 0,399385434 |  |
| 1570100_at   | -            | -1,763254337 | -2,162639771 | 0,399385434 |  |
| 202992_at    | C7           | -1,763254337 | -2,162639771 | 0,399385434 |  |
| 205220_at    | HCAR3        | -1,763254337 | -2,162639771 | 0,399385434 |  |
| 205569_at    | LAMP3        | -1,763254337 | -2,162639771 | 0,399385434 |  |
| 207158_at    | APOBEC1      | -1,763254337 | -2,162639771 | 0,399385434 |  |
| 208461_at    | HIC1         | -1,763254337 | -2,162639771 | 0,399385434 |  |
| 208467_at    | KLF12        | -1,763254337 | -2,162639771 | 0,399385434 |  |
| 220021_at    | TMC7         | -1,763254337 | -2,162639771 | 0,399385434 |  |
| 232852_at    | -            | -1,763254337 | -2,162639771 | 0,399385434 |  |
| 237644_at    | -            | -1,763254337 | -2,162639771 | 0,399385434 |  |
| 241179_at    | -            | -1,763254337 | -2,162639771 | 0,399385434 |  |
| 241971_at    | -            | -1,763254337 | -2,162639771 | 0,399385434 |  |
| 221564_at    | PRMT2        | 4,88279496   | 4,483415907  | 0,399379053 |  |
| 1553311_at   | C20orf197    | -1,812418401 | -2,211750327 | 0,399331926 |  |
| 1559263_s_at | ZC3H12D      | -1,812418401 | -2,211750327 | 0,399331926 |  |
| 1563035_x_at | GPD1         | -1,812418401 | -2,211750327 | 0,399331926 |  |
| 203788_s_at  | SEMA3C       | -1,812418401 | -2,211750327 | 0,399331926 |  |
| 205030_at    | FABP7        | -1,812418401 | -2,211750327 | 0,399331926 |  |
| 213556_at    | LOC390940    | -1,812418401 | -2,211750327 | 0,399331926 |  |
| 214631_at    | ZBTB33       | -1,812418401 | -2,211750327 | 0,399331926 |  |
| 224384_s_at  | RNF17        | -1,812418401 | -2,211750327 | 0,399331926 |  |
| 227769_at    | GPR27        | -1,812418401 | -2,211750327 | 0,399331926 |  |
| 236874_at    | -            | -1,812418401 | -2,211750327 | 0,399331926 |  |
| 238085_at    | LOC100507653 | -1,812418401 | -2,211750327 | 0,399331926 |  |
| 238457_at    | DGKE         | -1,812418401 | -2,211750327 | 0,399331926 |  |
| 242527_at    | -            | -1,812418401 | -2,211750327 | 0,399331926 |  |
| 239043_at    | ZNF404       | 1,504602299  | 1,105412836  | 0,399189463 |  |
| 1553689_s_at | METTL6       | 2,553576109  | 2,154405725  | 0,399170384 |  |
| 227299_at    | CCNI         | 0,735041319  | 0,336136178  | 0,398905142 |  |
| 1562217_at   | FLJ34521     | -1,688127507 | -2,086984744 | 0,398857237 |  |
| 1563168_at   | NRG1-IT1     | -1,688127507 | -2,086984744 | 0,398857237 |  |
| 204163_at    | EMILIN1      | -1,688127507 | -2,086984744 | 0,398857237 |  |
| 233169_at    | ZNF350       | -1,688127507 | -2,086984744 | 0,398857237 |  |
| 1555579_s_at | PTPRM        | -2,597496523 | -2,996335703 | 0,39883918  |  |
| 1557363_a_at | PHIP         | -2,597496523 | -2,996335703 | 0,39883918  |  |
| 1560063_a_at | -            | -2,597496523 | -2,996335703 | 0,39883918  |  |
| 1561239_at   | -            | -2,597496523 | -2,996335703 | 0,39883918  |  |
| 1561721_a_at | C12orf40     | -2,597496523 | -2,996335703 | 0,39883918  |  |
| 1568487_x_at | -            | -2,597496523 | -2,996335703 | 0,39883918  |  |
| 1569508_at   | PRDM5        | -2,597496523 | -2,996335703 | 0,39883918  |  |
| 203998_s_at  | SYT1         | -2,597496523 | -2,996335703 | 0,39883918  |  |
| 209469_at    | GPM6A        | -2,597496523 | -2,996335703 | 0,39883918  |  |
| 214131_at    | TXLNG2P      | -2,597496523 | -2,996335703 | 0,39883918  |  |
| 215665_at    | -            | -2,597496523 | -2,996335703 | 0,39883918  |  |

|              |                  |              |              |             |  |
|--------------|------------------|--------------|--------------|-------------|--|
| 234041_at    | -                | -2,597496523 | -2,996335703 | 0,39883918  |  |
| 235050_at    | SLC2A12          | -2,597496523 | -2,996335703 | 0,39883918  |  |
| 239767_at    | -                | -2,597496523 | -2,996335703 | 0,39883918  |  |
| 242815_x_at  | -                | -2,597496523 | -2,996335703 | 0,39883918  |  |
| 243625_at    | -                | -2,597496523 | -2,996335703 | 0,39883918  |  |
| 228229_at    | ZNF526           | 1,348276312  | 0,949447784  | 0,398828528 |  |
| 1569264_at   | LOC400655        | -0,366776884 | -0,765504029 | 0,398727145 |  |
| 202831_at    | GPX2             | -0,366776884 | -0,765504029 | 0,398727145 |  |
| 222334_at    | C1orf186 /// LOC | -0,366776884 | -0,765504029 | 0,398727145 |  |
| 222861_x_at  | FBXO44           | -0,366776884 | -0,765504029 | 0,398727145 |  |
| 223703_at    | C10orf11         | -0,366776884 | -0,765504029 | 0,398727145 |  |
| 237870_at    | NQO2             | -0,366776884 | -0,765504029 | 0,398727145 |  |
| 242124_at    | CHST1            | -0,366776884 | -0,765504029 | 0,398727145 |  |
| 205194_at    | PSPH             | 2,791679321  | 2,39311332   | 0,398566002 |  |
| 204877_s_at  | TAOK2            | 0,555999837  | 0,157549243  | 0,398450594 |  |
| 235725_at    | SMAD4            | 0,555999837  | 0,157549243  | 0,398450594 |  |
| 1560209_at   | -                | -2,779459409 | -3,177802286 | 0,398342878 |  |
| 215879_at    | ITGB1            | -2,779459409 | -3,177802286 | 0,398342878 |  |
| 217402_at    | -                | -2,779459409 | -3,177802286 | 0,398342878 |  |
| 235831_at    | -                | -2,779459409 | -3,177802286 | 0,398342878 |  |
| 243548_x_at  | -                | -2,779459409 | -3,177802286 | 0,398342878 |  |
| 1554022_at   | CCDC13           | -1,888254346 | -2,286583451 | 0,398329105 |  |
| 1557402_at   | -                | -1,888254346 | -2,286583451 | 0,398329105 |  |
| 1562713_a_at | NETO1            | -1,888254346 | -2,286583451 | 0,398329105 |  |
| 1563743_at   | C1orf180         | -1,888254346 | -2,286583451 | 0,398329105 |  |
| 1565821_at   | -                | -1,888254346 | -2,286583451 | 0,398329105 |  |
| 1568791_s_at | LOC100505518     | -1,888254346 | -2,286583451 | 0,398329105 |  |
| 1569561_at   | -                | -1,888254346 | -2,286583451 | 0,398329105 |  |
| 216161_at    | SBNO1            | -1,888254346 | -2,286583451 | 0,398329105 |  |
| 216319_at    | -                | -1,888254346 | -2,286583451 | 0,398329105 |  |
| 216893_s_at  | COL4A3           | -1,888254346 | -2,286583451 | 0,398329105 |  |
| 220829_s_at  | B3GALT1          | -1,888254346 | -2,286583451 | 0,398329105 |  |
| 220833_at    | -                | -1,888254346 | -2,286583451 | 0,398329105 |  |
| 221370_at    | LOC100287163 /   | -1,888254346 | -2,286583451 | 0,398329105 |  |
| 221393_at    | TAAR3            | -1,888254346 | -2,286583451 | 0,398329105 |  |
| 228342_s_at  | ALPK3            | -1,888254346 | -2,286583451 | 0,398329105 |  |
| 231460_at    | LOC100507511     | -1,888254346 | -2,286583451 | 0,398329105 |  |
| 232363_at    | -                | -1,888254346 | -2,286583451 | 0,398329105 |  |
| 239222_at    | C9orf9           | -1,888254346 | -2,286583451 | 0,398329105 |  |
| 240213_at    | -                | -1,888254346 | -2,286583451 | 0,398329105 |  |
| 240510_at    | NBN              | -1,888254346 | -2,286583451 | 0,398329105 |  |
| 207247_s_at  | ZFX /// ZFY      | 0,457392764  | 0,059218869  | 0,398173896 |  |
| 218489_s_at  | ALAD             | 0,457392764  | 0,059218869  | 0,398173896 |  |
| 226003_at    | KIF21A           | 1,215326747  | 0,817300337  | 0,39802641  |  |
| 201687_s_at  | API5             | 4,837141808  | 4,439136927  | 0,398004881 |  |
| 213017_at    | ABHD3            | 2,396622324  | 1,998633167  | 0,397989156 |  |
| 1553429_at   | FLJ31713         | -1,639579028 | -2,037551727 | 0,397972698 |  |
| 1554292_a_at | UHRF1BP1L        | -1,639579028 | -2,037551727 | 0,397972698 |  |
| 1554409_at   | LOC653375 /// W  | -1,639579028 | -2,037551727 | 0,397972698 |  |
| 1555189_a_at | TAT              | -1,639579028 | -2,037551727 | 0,397972698 |  |
| 1556425_a_at | LOC284219        | -1,639579028 | -2,037551727 | 0,397972698 |  |
| 1566139_at   | HOPX             | -1,639579028 | -2,037551727 | 0,397972698 |  |
| 1569859_at   | -                | -1,639579028 | -2,037551727 | 0,397972698 |  |
| 205922_at    | VNN2             | -1,639579028 | -2,037551727 | 0,397972698 |  |
| 206598_at    | INS              | -1,639579028 | -2,037551727 | 0,397972698 |  |
| 210299_s_at  | FHL1             | -1,639579028 | -2,037551727 | 0,397972698 |  |

|              |                |              |              |             |  |
|--------------|----------------|--------------|--------------|-------------|--|
| 210437_at    | MAGEA9 /// MAC | -1,639579028 | -2,037551727 | 0,397972698 |  |
| 214927_at    | ITGBL1         | -1,639579028 | -2,037551727 | 0,397972698 |  |
| 217467_at    | -              | -1,639579028 | -2,037551727 | 0,397972698 |  |
| 222936_s_at  | DESI2          | -1,639579028 | -2,037551727 | 0,397972698 |  |
| 234819_at    | -              | -1,639579028 | -2,037551727 | 0,397972698 |  |
| 237392_at    | FGF14-IT1      | -1,639579028 | -2,037551727 | 0,397972698 |  |
| 244472_at    | TRABD2B        | -1,639579028 | -2,037551727 | 0,397972698 |  |
| 244776_at    | -              | -1,639579028 | -2,037551727 | 0,397972698 |  |
| 230380_at    | THAP2          | 1,153678675  | 0,755840599  | 0,397838076 |  |
| 219248_at    | THUMPD2        | 1,542099044  | 1,144305291  | 0,397793753 |  |
| 226806_s_at  | NFIA           | 1,089278259  | 0,691645685  | 0,397632574 |  |
| 207993_s_at  | CHP1           | 1,575032557  | 1,177496821  | 0,397535736 |  |
| 1552327_at   | ARMCX4         | -1,937711681 | -2,335104118 | 0,397392437 |  |
| 1563745_a_at | LOC283050      | -1,937711681 | -2,335104118 | 0,397392437 |  |
| 216998_s_at  | ADAM5P         | -1,937711681 | -2,335104118 | 0,397392437 |  |
| 222350_at    | -              | -1,937711681 | -2,335104118 | 0,397392437 |  |
| 224067_at    | -              | -1,937711681 | -2,335104118 | 0,397392437 |  |
| 234331_s_at  | FAM84A         | -1,937711681 | -2,335104118 | 0,397392437 |  |
| 237975_at    | LOC100505986   | -1,937711681 | -2,335104118 | 0,397392437 |  |
| 237986_at    | -              | -1,937711681 | -2,335104118 | 0,397392437 |  |
| 238081_at    | WDFY3-AS2      | -1,937711681 | -2,335104118 | 0,397392437 |  |
| 1553690_at   | SGOL1          | 0,425644434  | 0,028364014  | 0,397280419 |  |
| 207022_s_at  | LDHC           | 0,425644434  | 0,028364014  | 0,397280419 |  |
| 213975_s_at  | LYZ            | 3,464815649  | 3,067567462  | 0,397248187 |  |
| 1562329_at   | CSMD1          | -3,07502285  | -3,472251727 | 0,397228877 |  |
| 241296_at    | -              | -3,07502285  | -3,472251727 | 0,397228877 |  |
| 224436_s_at  | NIPSNAP3A      | 3,891817836  | 3,49464046   | 0,397177376 |  |
| 229787_s_at  | -              | 1,512180019  | 1,115234684  | 0,396945334 |  |
| 204443_at    | ARSA           | 0,317354302  | -0,079522948 | 0,39687725  |  |
| 241928_at    | -              | 0,317354302  | -0,079522948 | 0,39687725  |  |
| 204251_s_at  | CEP164         | 1,000476627  | 0,603679647  | 0,396796981 |  |
| 213426_s_at  | CAV2           | 1,000476627  | 0,603679647  | 0,396796981 |  |
| 1553488_at   | TEKT5          | -1,026571149 | -1,423348341 | 0,396777193 |  |
| 205445_at    | PRL            | -1,026571149 | -1,423348341 | 0,396777193 |  |
| 214572_s_at  | INSL3          | -1,026571149 | -1,423348341 | 0,396777193 |  |
| 220331_at    | CYP46A1        | -1,026571149 | -1,423348341 | 0,396777193 |  |
| 230100_x_at  | PAK1           | -1,026571149 | -1,423348341 | 0,396777193 |  |
| 233796_at    | -              | -1,026571149 | -1,423348341 | 0,396777193 |  |
| 242455_at    | POU3F2         | -1,026571149 | -1,423348341 | 0,396777193 |  |
| 228091_at    | STX17          | 1,318332599  | 0,921731975  | 0,396600624 |  |
| 242006_at    | LCA5           | 1,318332599  | 0,921731975  | 0,396600624 |  |
| 238002_at    | GOLIM4         | 3,098971025  | 2,702564916  | 0,396406109 |  |
| 204904_at    | GJA4           | 0,20027154   | -0,19610998  | 0,39638152  |  |
| 231997_at    | TBCEL          | 0,20027154   | -0,19610998  | 0,39638152  |  |
| 1556982_at   | -              | 0,853119696  | 0,456918297  | 0,396201399 |  |
| 223491_at    | COMMD2         | 2,972842302  | 2,576704359  | 0,396137943 |  |
| 1561985_at   | C14orf39       | -0,022466681 | -0,41858459  | 0,396117909 |  |
| 217124_at    | IQCE           | -0,022466681 | -0,41858459  | 0,396117909 |  |
| 227867_at    | TRABD2A        | -0,022466681 | -0,41858459  | 0,396117909 |  |
| 230058_at    | SDCCAG3        | -0,022466681 | -0,41858459  | 0,396117909 |  |
| 236322_at    | -              | -0,022466681 | -0,41858459  | 0,396117909 |  |
| 204242_s_at  | ACOX3          | 1,201332287  | 0,805216064  | 0,396116223 |  |
| 1564784_at   | -              | -0,423248115 | -0,819238336 | 0,395990221 |  |
| 1569339_s_at | LOC100287558   | -0,423248115 | -0,819238336 | 0,395990221 |  |
| 204620_s_at  | VCAN           | -0,423248115 | -0,819238336 | 0,395990221 |  |
| 210047_at    | SLC11A2        | -0,423248115 | -0,819238336 | 0,395990221 |  |

|              |                  |              |              |             |  |
|--------------|------------------|--------------|--------------|-------------|--|
| 215327_at    | -                | -0,423248115 | -0,819238336 | 0,395990221 |  |
| 235136_at    | ORMDL3           | -0,423248115 | -0,819238336 | 0,395990221 |  |
| 236730_at    | GIPC3            | -0,423248115 | -0,819238336 | 0,395990221 |  |
| 239186_at    | MGC39372         | -0,423248115 | -0,819238336 | 0,395990221 |  |
| 241529_at    | -                | -0,423248115 | -0,819238336 | 0,395990221 |  |
| 243973_at    | -                | -0,423248115 | -0,819238336 | 0,395990221 |  |
| 212127_at    | RANGAP1          | 2,201862497  | 1,805902329  | 0,395960167 |  |
| 217975_at    | WBP5             | 4,845789115  | 4,449849671  | 0,395939444 |  |
| 209144_s_at  | CBFA2T2          | 0,072842263  | -0,322870281 | 0,395712544 |  |
| 228734_at    | -                | 0,072842263  | -0,322870281 | 0,395712544 |  |
| 230390_at    | -                | 0,072842263  | -0,322870281 | 0,395712544 |  |
| 236273_at    | NBPF1            | 1,968405881  | 1,572742379  | 0,395663502 |  |
| 1567014_s_at | CSNK2A1 /// CSN  | 2,666540916  | 2,271023131  | 0,395517785 |  |
| 1554199_at   | PTPRO            | -2,384869671 | -2,780313924 | 0,395444253 |  |
| 1554438_at   | KIAA1217         | -2,384869671 | -2,780313924 | 0,395444253 |  |
| 1560034_a_at | -                | -2,384869671 | -2,780313924 | 0,395444253 |  |
| 1560981_a_at | PPARA            | -2,384869671 | -2,780313924 | 0,395444253 |  |
| 1563002_at   | -                | -2,384869671 | -2,780313924 | 0,395444253 |  |
| 1565107_x_at | -                | -2,384869671 | -2,780313924 | 0,395444253 |  |
| 203029_s_at  | PTPRN2           | -2,384869671 | -2,780313924 | 0,395444253 |  |
| 215107_s_at  | TTC22            | -2,384869671 | -2,780313924 | 0,395444253 |  |
| 215751_at    | -                | -2,384869671 | -2,780313924 | 0,395444253 |  |
| 216322_at    | CD58             | -2,384869671 | -2,780313924 | 0,395444253 |  |
| 231292_at    | EID3             | -2,384869671 | -2,780313924 | 0,395444253 |  |
| 233705_at    | PACIN2           | -2,384869671 | -2,780313924 | 0,395444253 |  |
| 234732_s_at  | EFCAB6           | -2,384869671 | -2,780313924 | 0,395444253 |  |
| 237834_at    | SNCAIP           | -2,384869671 | -2,780313924 | 0,395444253 |  |
| 239279_at    | LOC730102        | -2,384869671 | -2,780313924 | 0,395444253 |  |
| 239936_at    | DLEU2            | -2,384869671 | -2,780313924 | 0,395444253 |  |
| 240597_at    | -                | -2,384869671 | -2,780313924 | 0,395444253 |  |
| 241657_at    | -                | -2,384869671 | -2,780313924 | 0,395444253 |  |
| 244463_at    | ADAM23           | -2,384869671 | -2,780313924 | 0,395444253 |  |
| 57588_at     | SLC24A3          | -2,173511597 | -2,568876131 | 0,395364534 |  |
| 1555407_s_at | FGD3             | -0,759588698 | -1,154897679 | 0,395308981 |  |
| 1555822_at   | FAM138A /// FAM  | -0,759588698 | -1,154897679 | 0,395308981 |  |
| 1556409_a_at | -                | -0,759588698 | -1,154897679 | 0,395308981 |  |
| 1556687_a_at | CLDN10           | -0,759588698 | -1,154897679 | 0,395308981 |  |
| 205179_s_at  | ADAM8            | -0,759588698 | -1,154897679 | 0,395308981 |  |
| 205831_at    | CD2              | -0,759588698 | -1,154897679 | 0,395308981 |  |
| 210472_at    | MT1G             | -0,759588698 | -1,154897679 | 0,395308981 |  |
| 232986_at    | ZNF233           | -0,759588698 | -1,154897679 | 0,395308981 |  |
| 239029_at    | TMCC1            | -0,759588698 | -1,154897679 | 0,395308981 |  |
| 239165_at    | -                | -0,759588698 | -1,154897679 | 0,395308981 |  |
| 240794_at    | NPAS4            | -0,759588698 | -1,154897679 | 0,395308981 |  |
| 238860_at    | C6orf130         | 1,119359127  | 0,724100169  | 0,395258958 |  |
| 1553229_at   | ZNF572           | 1,163336153  | 0,768343791  | 0,394992363 |  |
| 1553461_at   | FAM9B            | -2,01371626  | -2,408705138 | 0,394988877 |  |
| 1553573_s_at | EFNA2            | -2,01371626  | -2,408705138 | 0,394988877 |  |
| 1554147_s_at | C3orf15 /// LOC1 | -2,01371626  | -2,408705138 | 0,394988877 |  |
| 1556362_at   | -                | -2,01371626  | -2,408705138 | 0,394988877 |  |
| 1561633_at   | HMGA2            | -2,01371626  | -2,408705138 | 0,394988877 |  |
| 1563104_at   | -                | -2,01371626  | -2,408705138 | 0,394988877 |  |
| 205962_at    | PAK2             | -2,01371626  | -2,408705138 | 0,394988877 |  |
| 207362_at    | SLC30A4          | -2,01371626  | -2,408705138 | 0,394988877 |  |
| 210572_at    | PCDHA2           | -2,01371626  | -2,408705138 | 0,394988877 |  |
| 220450_at    | -                | -2,01371626  | -2,408705138 | 0,394988877 |  |

|              |                 |              |              |             |  |
|--------------|-----------------|--------------|--------------|-------------|--|
| 221720_s_at  | -               | -2,01371626  | -2,408705138 | 0,394988877 |  |
| 231585_at    | VPS13A          | -2,01371626  | -2,408705138 | 0,394988877 |  |
| 236966_at    | ARMC8           | -2,01371626  | -2,408705138 | 0,394988877 |  |
| 237815_at    | -               | -2,01371626  | -2,408705138 | 0,394988877 |  |
| 244851_at    | -               | -2,01371626  | -2,408705138 | 0,394988877 |  |
| 60794_f_at   | ZNF814          | -1,663649063 | -2,058592585 | 0,394943523 |  |
| 210220_at    | FZD2            | 1,05337236   | 0,658444279  | 0,39492808  |  |
| 212275_s_at  | SRCAP           | 1,05337236   | 0,658444279  | 0,39492808  |  |
| 214875_x_at  | APLP2           | 4,10413628   | 3,709248632  | 0,394887648 |  |
| 227546_x_at  | AURKAIP1        | 2,783874823  | 2,389070873  | 0,39480395  |  |
| 218818_at    | FHL3            | 2,691784869  | 2,297144887  | 0,394639983 |  |
| 1559995_at   | SAMD14          | -0,172274514 | -0,566887459 | 0,394612946 |  |
| 215003_at    | DGCR9           | -0,172274514 | -0,566887459 | 0,394612946 |  |
| 229545_at    | FERMT1          | -0,172274514 | -0,566887459 | 0,394612946 |  |
| 233837_at    | GGT1            | -0,172274514 | -0,566887459 | 0,394612946 |  |
| 210145_at    | PLA2G4A         | 1,631786706  | 1,23718272   | 0,394603986 |  |
| 240079_at    | ZNF81           | 1,631786706  | 1,23718272   | 0,394603986 |  |
| 235168_at    | PIGM            | 0,984222186  | 0,589657387  | 0,394564799 |  |
| 221553_at    | MAGT1           | 2,669932407  | 2,275409734  | 0,394522673 |  |
| 209426_s_at  | AMACR /// C1QT  | 0,503742507  | 0,109221392  | 0,394521115 |  |
| 235297_at    | CELF1           | 0,503742507  | 0,109221392  | 0,394521115 |  |
| 1569891_at   | ATP5A1          | -0,655928373 | -1,050406615 | 0,394478242 |  |
| 201868_s_at  | TBL1X           | -0,655928373 | -1,050406615 | 0,394478242 |  |
| 211831_s_at  | THPO            | -0,655928373 | -1,050406615 | 0,394478242 |  |
| 218376_s_at  | MICAL1          | -0,655928373 | -1,050406615 | 0,394478242 |  |
| 220244_at    | LINC00312       | -0,655928373 | -1,050406615 | 0,394478242 |  |
| 230368_at    | ERF             | -0,655928373 | -1,050406615 | 0,394478242 |  |
| 231575_at    | EGR4            | -0,655928373 | -1,050406615 | 0,394478242 |  |
| 235325_at    | SPG7            | -0,655928373 | -1,050406615 | 0,394478242 |  |
| 236889_at    | -               | -0,655928373 | -1,050406615 | 0,394478242 |  |
| 238135_at    | AGTRAP          | -0,655928373 | -1,050406615 | 0,394478242 |  |
| 240786_at    | NOTCH4          | -0,655928373 | -1,050406615 | 0,394478242 |  |
| 226207_at    | RILPL1          | 2,043538949  | 1,64909809   | 0,394440859 |  |
| 213982_s_at  | RABGAP1L        | 2,122398022  | 1,728030156  | 0,394367866 |  |
| 238669_at    | PTGS1           | 1,58584542   | 1,191491281  | 0,394354139 |  |
| 220631_at    | OSGEPL1         | 1,764611101  | 1,370274469  | 0,394336631 |  |
| 1553376_a_at | AXDND1          | -2,64318869  | -3,037500868 | 0,394312178 |  |
| 1553582_a_at | SPAG11A /// SPA | -2,64318869  | -3,037500868 | 0,394312178 |  |
| 1554831_x_at | ALS2CR11        | -2,64318869  | -3,037500868 | 0,394312178 |  |
| 1559640_at   | ANKFN1          | -2,64318869  | -3,037500868 | 0,394312178 |  |
| 1560846_at   | -               | -2,64318869  | -3,037500868 | 0,394312178 |  |
| 1562294_x_at | ANKRD30B        | -2,64318869  | -3,037500868 | 0,394312178 |  |
| 1563721_at   | -               | -2,64318869  | -3,037500868 | 0,394312178 |  |
| 213910_at    | IGFBP7          | -2,64318869  | -3,037500868 | 0,394312178 |  |
| 238318_at    | -               | -2,64318869  | -3,037500868 | 0,394312178 |  |
| 240089_at    | -               | -2,64318869  | -3,037500868 | 0,394312178 |  |
| 242666_at    | -               | -2,64318869  | -3,037500868 | 0,394312178 |  |
| 222703_s_at  | YRDC            | 4,268075451  | 3,873779903  | 0,394295548 |  |
| 206463_s_at  | DHRS2           | 0,57058931   | 0,176436073  | 0,394153237 |  |
| 1553137_s_at | KLF11           | -1,518072576 | -1,912089812 | 0,394017236 |  |
| 1555250_a_at | CPEB3           | -1,518072576 | -1,912089812 | 0,394017236 |  |
| 1555587_at   | PDZRN3          | -1,518072576 | -1,912089812 | 0,394017236 |  |
| 1560615_a_at | -               | -1,518072576 | -1,912089812 | 0,394017236 |  |
| 1564886_at   | -               | -1,518072576 | -1,912089812 | 0,394017236 |  |
| 1569690_at   | CCDC36          | -1,518072576 | -1,912089812 | 0,394017236 |  |
| 216225_at    | -               | -1,518072576 | -1,912089812 | 0,394017236 |  |

|              |              |              |              |             |  |
|--------------|--------------|--------------|--------------|-------------|--|
| 216263_s_at  | NGDN         | -1,518072576 | -1,912089812 | 0,394017236 |  |
| 217186_at    | ZNF259P1     | -1,518072576 | -1,912089812 | 0,394017236 |  |
| 220131_at    | FXYD7        | -1,518072576 | -1,912089812 | 0,394017236 |  |
| 220855_at    | CLTC-IT1     | -1,518072576 | -1,912089812 | 0,394017236 |  |
| 228699_at    | NRP2         | -1,518072576 | -1,912089812 | 0,394017236 |  |
| 230400_s_at  | PKN2         | -1,518072576 | -1,912089812 | 0,394017236 |  |
| 232191_at    | ERVH48-1     | -1,518072576 | -1,912089812 | 0,394017236 |  |
| 234933_at    | CC2D2A       | -1,518072576 | -1,912089812 | 0,394017236 |  |
| 239818_x_at  | TRIB1        | -1,518072576 | -1,912089812 | 0,394017236 |  |
| 244490_at    | -            | -1,518072576 | -1,912089812 | 0,394017236 |  |
| 226447_at    | ASH1L        | 1,751865623  | 1,3579181    | 0,393947522 |  |
| 217001_x_at  | HLA-DOA      | 0,401366113  | 0,007421914  | 0,393944199 |  |
| 228525_at    | LRP3         | 0,401366113  | 0,007421914  | 0,393944199 |  |
| 236208_at    | MOCS2        | 0,401366113  | 0,007421914  | 0,393944199 |  |
| 1560911_at   | LOC100133461 | -0,285837228 | -0,679763839 | 0,393926611 |  |
| 222169_x_at  | SH2D3A       | -0,285837228 | -0,679763839 | 0,393926611 |  |
| 229341_at    | TFCP2L1      | -0,285837228 | -0,679763839 | 0,393926611 |  |
| 230308_at    | FAM120AOS    | -0,285837228 | -0,679763839 | 0,393926611 |  |
| 230756_at    | ZNF683       | -0,285837228 | -0,679763839 | 0,393926611 |  |
| 213497_at    | ABTB2        | 1,937784532  | 1,543943227  | 0,393841304 |  |
| 220363_s_at  | ELMO2        | 1,210676994  | 0,817300337  | 0,393376657 |  |
| 1560921_at   | ZNF169       | 0,291166226  | -0,102100538 | 0,393266763 |  |
| 205810_s_at  | WASL         | 0,291166226  | -0,102100538 | 0,393266763 |  |
| 231877_at    | TRMT10A      | 0,291166226  | -0,102100538 | 0,393266763 |  |
| 238639_x_at  | -            | 0,291166226  | -0,102100538 | 0,393266763 |  |
| 155544_a_at  | CADM2        | -2,063149277 | -2,456406426 | 0,393257149 |  |
| 1558845_at   | LOC100506089 | -2,063149277 | -2,456406426 | 0,393257149 |  |
| 1558894_a_at | CCDC67       | -2,063149277 | -2,456406426 | 0,393257149 |  |
| 1562699_at   | -            | -2,063149277 | -2,456406426 | 0,393257149 |  |
| 1570415_at   | DDX52        | -2,063149277 | -2,456406426 | 0,393257149 |  |
| 205225_at    | ESR1         | -2,063149277 | -2,456406426 | 0,393257149 |  |
| 206808_at    | HNRNPA3P1    | -2,063149277 | -2,456406426 | 0,393257149 |  |
| 207619_at    | HCRTR1       | -2,063149277 | -2,456406426 | 0,393257149 |  |
| 208495_at    | TLX3         | -2,063149277 | -2,456406426 | 0,393257149 |  |
| 210068_s_at  | AQP4         | -2,063149277 | -2,456406426 | 0,393257149 |  |
| 216831_s_at  | RUNX1T1      | -2,063149277 | -2,456406426 | 0,393257149 |  |
| 223784_at    | TMEM27       | -2,063149277 | -2,456406426 | 0,393257149 |  |
| 229881_at    | KLF12        | -2,063149277 | -2,456406426 | 0,393257149 |  |
| 230683_at    | -            | -2,063149277 | -2,456406426 | 0,393257149 |  |
| 236522_at    | -            | -2,063149277 | -2,456406426 | 0,393257149 |  |
| 237271_at    | LOC154872    | -2,063149277 | -2,456406426 | 0,393257149 |  |
| 239595_at    | GPX2         | -2,063149277 | -2,456406426 | 0,393257149 |  |
| 240560_at    | -            | -2,063149277 | -2,456406426 | 0,393257149 |  |
| 242846_at    | -            | -2,063149277 | -2,456406426 | 0,393257149 |  |
| 243202_at    | -            | -2,063149277 | -2,456406426 | 0,393257149 |  |
| 200765_x_at  | CTNNA1       | 3,537166687  | 3,14392006   | 0,393246626 |  |
| 225338_at    | ZYG11B       | 3,196259441  | 2,803210557  | 0,393048884 |  |
| 228606_at    | TCTEX1D2     | 2,776027875  | 2,382985886  | 0,393041989 |  |
| 205841_at    | JAK2         | 1,422536444  | 1,029536893  | 0,392999551 |  |
| 204104_at    | SNAPC2       | 0,810733188  | 0,417770464  | 0,392962724 |  |
| 220032_at    | CPED1        | 0,810733188  | 0,417770464  | 0,392962724 |  |
| 1559993_at   | SFXN3        | -0,221656139 | -0,614371577 | 0,392715438 |  |
| 212970_at    | APBB2        | -0,221656139 | -0,614371577 | 0,392715438 |  |
| 227992_s_at  | LINC00085    | -0,221656139 | -0,614371577 | 0,392715438 |  |
| 231765_at    | ZFYVE20      | -0,221656139 | -0,614371577 | 0,392715438 |  |
| 227772_at    | LATS1        | 3,396853889  | 3,004228687  | 0,392625203 |  |

|              |                 |              |              |             |  |
|--------------|-----------------|--------------|--------------|-------------|--|
| 222034_at    | GNB2L1 /// LOC1 | 1,638726528  | 1,246149888  | 0,39257664  |  |
| 224593_at    | ZNF664          | 4,256842836  | 3,864347045  | 0,39249579  |  |
| 215178_x_at  | NAAA            | 1,406361373  | 1,013870809  | 0,392490564 |  |
| 1554113_a_at | SLC4A8          | 0,171847695  | -0,220592223 | 0,392439919 |  |
| 213424_at    | KIAA0895        | 0,171847695  | -0,220592223 | 0,392439919 |  |
| 227832_at    | MBD6            | 0,171847695  | -0,220592223 | 0,392439919 |  |
| 239170_at    | ACTR3           | 0,171847695  | -0,220592223 | 0,392439919 |  |
| 244889_at    | LOC388210       | 0,171847695  | -0,220592223 | 0,392439919 |  |
| 208616_s_at  | PTP4A2          | 6,7596472    | 6,367261321  | 0,39238588  |  |
| 225835_at    | SLC12A2         | 2,182996494  | 1,790660532  | 0,392335962 |  |
| 203368_at    | CRELD1          | 0,255492549  | -0,136643983 | 0,392136532 |  |
| 234568_at    | SCAMP5          | 0,255492549  | -0,136643983 | 0,392136532 |  |
| 238893_at    | LOC338758       | 0,255492549  | -0,136643983 | 0,392136532 |  |
| 241277_x_at  | ZNF837          | 0,255492549  | -0,136643983 | 0,392136532 |  |
| 223463_at    | RAB23           | 4,842787231  | 4,450819624  | 0,391967607 |  |
| 222036_s_at  | MCM4            | 4,650612883  | 4,258712848  | 0,391900035 |  |
| 1566284_at   | -               | -1,470833215 | -1,862647763 | 0,391814547 |  |
| 204563_at    | SELL            | -1,470833215 | -1,862647763 | 0,391814547 |  |
| 205549_at    | PCP4            | -1,470833215 | -1,862647763 | 0,391814547 |  |
| 206193_s_at  | CDSN            | -1,470833215 | -1,862647763 | 0,391814547 |  |
| 219430_at    | GPR137          | -1,470833215 | -1,862647763 | 0,391814547 |  |
| 220677_s_at  | ADAMTS8         | -1,470833215 | -1,862647763 | 0,391814547 |  |
| 228964_at    | PRDM1           | -1,470833215 | -1,862647763 | 0,391814547 |  |
| 230823_at    | -               | -1,470833215 | -1,862647763 | 0,391814547 |  |
| 233345_at    | EFCAB6          | -1,470833215 | -1,862647763 | 0,391814547 |  |
| 234488_s_at  | GMCL1 /// GMCL  | 0,641402394  | 0,249604176  | 0,391798219 |  |
| 224565_at    | LOC100653017 /  | 3,67603922   | 3,284389368  | 0,391649852 |  |
| 201295_s_at  | WSB1            | 0,702292136  | 0,310717132  | 0,391575004 |  |
| 224036_s_at  | LMBR1           | 2,611163891  | 2,21959457   | 0,391569321 |  |
| 229711_s_at  | MDM2            | 3,159334685  | 2,767843855  | 0,39149083  |  |
| 229797_at    | MCOLN3          | 0,995078803  | 0,603679647  | 0,391399156 |  |
| 1553060_at   | PSKH2           | 0,133056859  | -0,258114234 | 0,391171092 |  |
| 237718_at    | EIF4E           | 0,133056859  | -0,258114234 | 0,391171092 |  |
| 243007_at    | TTC5            | 0,133056859  | -0,258114234 | 0,391171092 |  |
| 209004_s_at  | FBXL5           | 3,171349466  | 2,780243895  | 0,391105571 |  |
| 1563065_at   | -               | -0,986356909 | -1,377419394 | 0,391062485 |  |
| 1563483_at   | FAM91A2         | -0,986356909 | -1,377419394 | 0,391062485 |  |
| 1565825_at   | -               | -0,986356909 | -1,377419394 | 0,391062485 |  |
| 207950_s_at  | ANK3            | -0,986356909 | -1,377419394 | 0,391062485 |  |
| 211329_x_at  | HFE             | -0,986356909 | -1,377419394 | 0,391062485 |  |
| 214822_at    | FAM5B           | -0,986356909 | -1,377419394 | 0,391062485 |  |
| 215206_at    | -               | -0,986356909 | -1,377419394 | 0,391062485 |  |
| 233015_at    | MBNL1           | -0,986356909 | -1,377419394 | 0,391062485 |  |
| 238369_s_at  | LOC100507186    | -0,986356909 | -1,377419394 | 0,391062485 |  |
| 225970_at    | DDHD1           | 2,402750389  | 2,011838132  | 0,390912257 |  |
| 204156_at    | SIK3            | 0,613492853  | 0,222599095  | 0,390893758 |  |
| 227098_at    | DUSP18          | 0,613492853  | 0,222599095  | 0,390893758 |  |
| 208190_s_at  | LSR             | 1,177702228  | 0,786897721  | 0,390804506 |  |
| 204285_s_at  | PMAIP1          | 5,187613093  | 4,796999275  | 0,390613819 |  |
| 213128_s_at  | UBE3A           | 3,668429488  | 3,277845403  | 0,390584085 |  |
| 238738_at    | -               | 1,339784194  | 0,949447784  | 0,390336411 |  |
| 200617_at    | MLEC            | 3,010782559  | 2,620464265  | 0,390318294 |  |
| 212876_at    | B4GALT4         | 2,320980353  | 1,930732138  | 0,390248215 |  |
| 214588_s_at  | MFAP3           | 0,518867317  | 0,128747141  | 0,390120176 |  |
| 222660_s_at  | RNF38           | 0,518867317  | 0,128747141  | 0,390120176 |  |
| 201121_s_at  | PGRMC1          | 4,935173991  | 4,545117128  | 0,390056863 |  |

|              |           |              |              |             |  |
|--------------|-----------|--------------|--------------|-------------|--|
| 227409_at    | PPP1R3E   | -0,00073712  | -0,39061235  | 0,38987523  |  |
| 236477_at    | PRPF40A   | -0,00073712  | -0,39061235  | 0,38987523  |  |
| 244376_at    | METTL7A   | -0,00073712  | -0,39061235  | 0,38987523  |  |
| 235625_at    | VPS41     | 1,926486359  | 1,536652708  | 0,389833652 |  |
| 211721_s_at  | ZNF551    | 1,780386218  | 1,390636111  | 0,389750107 |  |
| 213434_at    | STX2      | 1,649074067  | 1,259496994  | 0,389577072 |  |
| 224444_s_at  | LINC00467 | 0,767063567  | 0,377530647  | 0,38953292  |  |
| 1563639_a_at | FHAD1     | 1,504602299  | 1,115234684  | 0,389367615 |  |
| 201309_x_at  | NREP      | 2,139623739  | 1,750261389  | 0,38936235  |  |
| 1562211_a_at | ZNF491    | 0,417596971  | 0,028364014  | 0,389232956 |  |
| 238146_at    | -         | 0,417596971  | 0,028364014  | 0,389232956 |  |
| 221995_s_at  | -         | 1,027166904  | 0,638150376  | 0,389016528 |  |
| 202611_s_at  | MED14     | 2,696781084  | 2,307890888  | 0,388890196 |  |
| 223062_s_at  | PSAT1     | 4,377913865  | 3,989102799  | 0,388811067 |  |
| 225062_at    | LOC389831 | 2,472384965  | 2,083632167  | 0,388752798 |  |
| 234726_s_at  | TMEM168   | 1,556829052  | 1,16809119   | 0,388737861 |  |
| 1560978_at   | -         | -0,467091869 | -0,855751026 | 0,388659157 |  |
| 223955_at    | EFCAB4B   | -0,467091869 | -0,855751026 | 0,388659157 |  |
| 235814_at    | -         | -0,467091869 | -0,855751026 | 0,388659157 |  |
| 239552_at    | VWDE      | -0,467091869 | -0,855751026 | 0,388659157 |  |
| 1561025_at   | -         | -3,013665402 | -3,402185466 | 0,388520064 |  |
| 229308_at    | ANKRD29   | -3,013665402 | -3,402185466 | 0,388520064 |  |
| 243273_at    | -         | -3,013665402 | -3,402185466 | 0,388520064 |  |
| 220261_s_at  | ZDHHC4    | 2,652894659  | 2,264418116  | 0,388476542 |  |
| 242584_at    | FAM161A   | 1,40228911   | 1,013870809  | 0,388418301 |  |
| 208652_at    | PPP2CA    | 5,773977476  | 5,38567249   | 0,388304986 |  |
| 1555342_a_at | UNC5C     | -0,83191556  | -1,220210588 | 0,388295028 |  |
| 1556689_a_at | WNT4      | -0,83191556  | -1,220210588 | 0,388295028 |  |
| 1562797_at   | -         | -0,83191556  | -1,220210588 | 0,388295028 |  |
| 1565329_at   | POLE4     | -0,83191556  | -1,220210588 | 0,388295028 |  |
| 1566210_at   | -         | -0,83191556  | -1,220210588 | 0,388295028 |  |
| 216363_at    | -         | -0,83191556  | -1,220210588 | 0,388295028 |  |
| 221001_at    | -         | -0,83191556  | -1,220210588 | 0,388295028 |  |
| 224106_at    | -         | -0,83191556  | -1,220210588 | 0,388295028 |  |
| 229550_at    | UNC79     | -0,83191556  | -1,220210588 | 0,388295028 |  |
| 232703_at    | GLUD1P7   | -0,83191556  | -1,220210588 | 0,388295028 |  |
| 233248_at    | -         | -0,83191556  | -1,220210588 | 0,388295028 |  |
| 242037_at    | ASPH      | -0,83191556  | -1,220210588 | 0,388295028 |  |
| 243413_at    | TTC30B    | -0,83191556  | -1,220210588 | 0,388295028 |  |
| 242145_at    | -         | 0,228146222  | -0,160136748 | 0,38828297  |  |
| 212533_at    | WEE1      | 4,695400025  | 4,307183466  | 0,388216559 |  |
| 232490_s_at  | PRUNE     | 0,30867765   | -0,079522948 | 0,388200598 |  |
| 223011_s_at  | OCIAD1    | 5,321676926  | 4,933712985  | 0,387963942 |  |
| 210761_s_at  | GRB7      | -0,148196756 | -0,536087151 | 0,387890394 |  |
| 225654_at    | NSD1      | -0,148196756 | -0,536087151 | 0,387890394 |  |
| 226491_x_at  | PTBP1     | -0,148196756 | -0,536087151 | 0,387890394 |  |
| 227088_at    | PDE5A     | -0,148196756 | -0,536087151 | 0,387890394 |  |
| 230235_at    | MCTS1     | -0,148196756 | -0,536087151 | 0,387890394 |  |
| 234696_at    | -         | -0,148196756 | -0,536087151 | 0,387890394 |  |
| 238806_at    | -         | -0,148196756 | -0,536087151 | 0,387890394 |  |
| 221773_at    | ELK3      | 2,663141434  | 2,275409734  | 0,3877317   |  |
| 225476_at    | GPANK1    | 1,62481334   | 1,23718272   | 0,38763062  |  |
| 211552_s_at  | ALDH4A1   | 0,882651021  | 0,495031851  | 0,38761917  |  |
| 1567282_at   | OR1J4     | -1,399512875 | -1,787089803 | 0,387576928 |  |
| 1568830_at   | IRAK3     | -1,399512875 | -1,787089803 | 0,387576928 |  |
| 210507_s_at  | AVIL      | -1,399512875 | -1,787089803 | 0,387576928 |  |



|              |                |              |              |             |  |
|--------------|----------------|--------------|--------------|-------------|--|
| 215480_at    | KIAA0509       | -1,399512875 | -1,787089803 | 0,387576928 |  |
| 223796_at    | CNTNAP3 /// CN | -1,399512875 | -1,787089803 | 0,387576928 |  |
| 231232_at    | LOC100506125   | -1,399512875 | -1,787089803 | 0,387576928 |  |
| 232650_at    | C12orf65       | -1,399512875 | -1,787089803 | 0,387576928 |  |
| 234049_at    | FLJ10661       | -1,399512875 | -1,787089803 | 0,387576928 |  |
| 1555225_at   | C1orf43        | 2,261526912  | 1,874012195  | 0,387514717 |  |
| 203495_at    | LRRC14         | 1,079110292  | 0,691645685  | 0,387464607 |  |
| 225327_at    | FAM214A        | 2,433006244  | 2,045615873  | 0,387390371 |  |
| 226851_at    | LYPLAL1        | 2,830080806  | 2,442710777  | 0,387370028 |  |
| 1557476_at   | PFN4           | -0,622910612 | -1,010192375 | 0,387281763 |  |
| 1570567_at   | -              | -0,622910612 | -1,010192375 | 0,387281763 |  |
| 209197_at    | SYT11          | -0,622910612 | -1,010192375 | 0,387281763 |  |
| 212311_at    | SEL1L3         | -0,622910612 | -1,010192375 | 0,387281763 |  |
| 216924_s_at  | DRD2           | -0,622910612 | -1,010192375 | 0,387281763 |  |
| 220506_at    | GUCY1B2        | -0,622910612 | -1,010192375 | 0,387281763 |  |
| 221156_x_at  | CCPG1          | -0,622910612 | -1,010192375 | 0,387281763 |  |
| 227966_s_at  | CCDC74A /// CC | -0,622910612 | -1,010192375 | 0,387281763 |  |
| 229191_at    | TBCD           | -0,622910612 | -1,010192375 | 0,387281763 |  |
| 232086_at    | PIK3C3         | -0,622910612 | -1,010192375 | 0,387281763 |  |
| 235367_at    | MYPN           | -0,622910612 | -1,010192375 | 0,387281763 |  |
| 237254_at    | SLC5A11        | -0,622910612 | -1,010192375 | 0,387281763 |  |
| 239907_at    | -              | -0,622910612 | -1,010192375 | 0,387281763 |  |
| 242523_at    | -              | -0,622910612 | -1,010192375 | 0,387281763 |  |
| 1553674_at   | LRRIQ3         | -2,187914861 | -2,575129729 | 0,387214868 |  |
| 1557444_at   | TREML3P        | -2,187914861 | -2,575129729 | 0,387214868 |  |
| 1559812_at   | -              | -2,187914861 | -2,575129729 | 0,387214868 |  |
| 1563219_at   | -              | -2,187914861 | -2,575129729 | 0,387214868 |  |
| 1563498_s_at | SLC25A45       | -2,187914861 | -2,575129729 | 0,387214868 |  |
| 1564337_at   | -              | -2,187914861 | -2,575129729 | 0,387214868 |  |
| 1568635_at   | -              | -2,187914861 | -2,575129729 | 0,387214868 |  |
| 1569518_at   | -              | -2,187914861 | -2,575129729 | 0,387214868 |  |
| 1570163_at   | EGFLAM-AS4     | -2,187914861 | -2,575129729 | 0,387214868 |  |
| 205381_at    | LRRC17         | -2,187914861 | -2,575129729 | 0,387214868 |  |
| 207910_at    | SCGB1D1        | -2,187914861 | -2,575129729 | 0,387214868 |  |
| 211095_at    | NF1            | -2,187914861 | -2,575129729 | 0,387214868 |  |
| 211161_s_at  | COL3A1         | -2,187914861 | -2,575129729 | 0,387214868 |  |
| 224189_x_at  | EHF            | -2,187914861 | -2,575129729 | 0,387214868 |  |
| 224423_x_at  | PMCHL2         | -2,187914861 | -2,575129729 | 0,387214868 |  |
| 233026_s_at  | PDZD2          | -2,187914861 | -2,575129729 | 0,387214868 |  |
| 234289_x_at  | -              | -2,187914861 | -2,575129729 | 0,387214868 |  |
| 234652_at    | -              | -2,187914861 | -2,575129729 | 0,387214868 |  |
| 236438_at    | -              | -2,187914861 | -2,575129729 | 0,387214868 |  |
| 237549_at    | -              | -2,187914861 | -2,575129729 | 0,387214868 |  |
| 241204_at    | -              | -2,187914861 | -2,575129729 | 0,387214868 |  |
| 244039_x_at  | -              | -2,187914861 | -2,575129729 | 0,387214868 |  |
| 218062_x_at  | CDC42EP4       | 1,578645857  | 1,191491281  | 0,387154576 |  |
| 211062_s_at  | CPZ /// GPR78  | 0,103263601  | -0,283667828 | 0,386931429 |  |
| 215114_at    | SENP3          | 0,103263601  | -0,283667828 | 0,386931429 |  |
| 215379_x_at  | IGLV1-44       | 0,103263601  | -0,283667828 | 0,386931429 |  |
| 230155_x_at  | MSL1           | 0,103263601  | -0,283667828 | 0,386931429 |  |
| 240677_at    | -              | 0,103263601  | -0,283667828 | 0,386931429 |  |
| 210486_at    | ANKMY1         | -0,259832361 | -0,646746079 | 0,386913717 |  |
| 216175_at    | -              | -0,259832361 | -0,646746079 | 0,386913717 |  |
| 237174_at    | -              | -0,259832361 | -0,646746079 | 0,386913717 |  |
| 1563680_at   | LOC284950      | -2,712026959 | -3,098858316 | 0,386831357 |  |
| 216314_at    | CRISP1         | -2,712026959 | -3,098858316 | 0,386831357 |  |

|              |                |              |              |             |  |
|--------------|----------------|--------------|--------------|-------------|--|
| 229331_at    | SPATA18        | -2,712026959 | -3,098858316 | 0,386831357 |  |
| 231679_at    | -              | -2,712026959 | -3,098858316 | 0,386831357 |  |
| 234628_at    | -              | -2,712026959 | -3,098858316 | 0,386831357 |  |
| 236670_s_at  | -              | -2,712026959 | -3,098858316 | 0,386831357 |  |
| 243896_at    | WDR96          | -2,712026959 | -3,098858316 | 0,386831357 |  |
| 228092_at    | CREM           | 1,233777334  | 0,847075464  | 0,38670187  |  |
| 221482_s_at  | ARPP19         | 3,999522577  | 3,6128809    | 0,386641678 |  |
| 218470_at    | YARS2          | 3,815781597  | 3,429217209  | 0,386564388 |  |
| 206055_s_at  | SNRPA1         | 5,773977476  | 5,387446626  | 0,38653085  |  |
| 223269_at    | POLR3GL        | 3,850569363  | 3,464222256  | 0,386347107 |  |
| 208436_s_at  | IRF7           | 2,854131948  | 2,467842989  | 0,386288959 |  |
| 224521_s_at  | CCDC77         | 1,515954005  | 1,129843209  | 0,386110796 |  |
| 235482_at    | PCBP1-AS1      | 0,779676066  | 0,393761504  | 0,385914561 |  |
| 212900_at    | SEC24A         | 3,345817457  | 2,959949103  | 0,385868355 |  |
| 200086_s_at  | COX4I1         | 5,931509779  | 5,545849527  | 0,385660251 |  |
| 223441_at    | SLC17A5        | 2,365585359  | 1,979940779  | 0,38564458  |  |
| 1554933_at   | PSIP1          | -2,504600601 | -2,89013181  | 0,385531209 |  |
| 1556813_at   | -              | -2,504600601 | -2,89013181  | 0,385531209 |  |
| 1564610_at   | -              | -2,504600601 | -2,89013181  | 0,385531209 |  |
| 210173_at    | PTPRJ          | -2,504600601 | -2,89013181  | 0,385531209 |  |
| 216258_s_at  | SERPINB13      | -2,504600601 | -2,89013181  | 0,385531209 |  |
| 233906_at    | -              | -2,504600601 | -2,89013181  | 0,385531209 |  |
| 236570_at    | ZNF366         | -2,504600601 | -2,89013181  | 0,385531209 |  |
| 238702_at    | SPTSSB         | -2,504600601 | -2,89013181  | 0,385531209 |  |
| 240637_at    | WDR41          | -2,504600601 | -2,89013181  | 0,385531209 |  |
| 242091_at    | ZNF720         | -2,504600601 | -2,89013181  | 0,385531209 |  |
| 1557078_at   | SLFN5          | -0,946847173 | -1,332017329 | 0,385170156 |  |
| 1560764_at   | -              | -0,946847173 | -1,332017329 | 0,385170156 |  |
| 1567242_at   | OR2L1P         | -0,946847173 | -1,332017329 | 0,385170156 |  |
| 210683_at    | NRTN           | -0,946847173 | -1,332017329 | 0,385170156 |  |
| 213030_s_at  | PLXNA2         | -0,946847173 | -1,332017329 | 0,385170156 |  |
| 215079_at    | -              | -0,946847173 | -1,332017329 | 0,385170156 |  |
| 216431_at    | -              | -0,946847173 | -1,332017329 | 0,385170156 |  |
| 220556_at    | ATP1B4         | -0,946847173 | -1,332017329 | 0,385170156 |  |
| 228715_at    | ZCCHC12        | -0,946847173 | -1,332017329 | 0,385170156 |  |
| 231224_x_at  | PRKAG2         | -0,946847173 | -1,332017329 | 0,385170156 |  |
| 234495_at    | KLK15          | -0,946847173 | -1,332017329 | 0,385170156 |  |
| 237060_at    | -              | -0,946847173 | -1,332017329 | 0,385170156 |  |
| 238078_at    | SEC22A         | -0,946847173 | -1,332017329 | 0,385170156 |  |
| 238445_x_at  | MGAT5B         | -0,946847173 | -1,332017329 | 0,385170156 |  |
| 202472_at    | MPI            | 0,917308734  | 0,532164371  | 0,385144363 |  |
| 1555892_s_at | LOC253039      | -0,033456564 | -0,41858459  | 0,385128025 |  |
| 212641_at    | HIVEP2         | -0,033456564 | -0,41858459  | 0,385128025 |  |
| 215461_at    | ZNRF4          | -0,033456564 | -0,41858459  | 0,385128025 |  |
| 228587_at    | FAM83G         | -0,033456564 | -0,41858459  | 0,385128025 |  |
| 234187_at    | -              | -0,033456564 | -0,41858459  | 0,385128025 |  |
| 242592_at    | GPR137C        | -0,033456564 | -0,41858459  | 0,385128025 |  |
| 213923_at    | RAP2B          | 5,547270277  | 5,162298023  | 0,384972254 |  |
| 243000_at    | CDK6           | 0,695652136  | 0,310717132  | 0,384935004 |  |
| 242428_at    | -              | 1,414471577  | 1,029536893  | 0,384934684 |  |
| 1555194_at   | -              | -2,236765673 | -2,621331989 | 0,384566316 |  |
| 1557004_at   | LOC100505902 / | -2,236765673 | -2,621331989 | 0,384566316 |  |
| 1559611_at   | TMEM75         | -2,236765673 | -2,621331989 | 0,384566316 |  |
| 1560887_a_at | -              | -2,236765673 | -2,621331989 | 0,384566316 |  |
| 1561212_at   | -              | -2,236765673 | -2,621331989 | 0,384566316 |  |
| 1562380_at   | -              | -2,236765673 | -2,621331989 | 0,384566316 |  |

|              |           |              |              |             |  |
|--------------|-----------|--------------|--------------|-------------|--|
| 1564078_at   | ADAM29    | -2,236765673 | -2,621331989 | 0,384566316 |  |
| 1565927_s_at | -         | -2,236765673 | -2,621331989 | 0,384566316 |  |
| 1567855_at   | ZNF29P    | -2,236765673 | -2,621331989 | 0,384566316 |  |
| 1570215_at   | -         | -2,236765673 | -2,621331989 | 0,384566316 |  |
| 204198_s_at  | RUNX3     | -2,236765673 | -2,621331989 | 0,384566316 |  |
| 206159_at    | GDF10     | -2,236765673 | -2,621331989 | 0,384566316 |  |
| 207284_s_at  | ASPH      | -2,236765673 | -2,621331989 | 0,384566316 |  |
| 219935_at    | ADAMTS5   | -2,236765673 | -2,621331989 | 0,384566316 |  |
| 220667_at    | USP49     | -2,236765673 | -2,621331989 | 0,384566316 |  |
| 222253_s_at  | POM121L9P | -2,236765673 | -2,621331989 | 0,384566316 |  |
| 235675_at    | DHFRL1    | -2,236765673 | -2,621331989 | 0,384566316 |  |
| 237570_x_at  | -         | -2,236765673 | -2,621331989 | 0,384566316 |  |
| 237957_at    | -         | -2,236765673 | -2,621331989 | 0,384566316 |  |
| 238063_at    | TMEM154   | -2,236765673 | -2,621331989 | 0,384566316 |  |
| 242779_at    | -         | -2,236765673 | -2,621331989 | 0,384566316 |  |
| 243507_s_at  | C20orf196 | 1,089278259  | 0,704715219  | 0,38456304  |  |
| 201741_x_at  | SRSF1     | 0,359971644  | -0,024572586 | 0,38454423  |  |
| 229801_at    | C10orf47  | 0,359971644  | -0,024572586 | 0,38454423  |  |
| 238545_at    | BRD7      | 0,359971644  | -0,024572586 | 0,38454423  |  |
| 228401_at    | ATAD2     | 4,266956117  | 3,882432751  | 0,384523365 |  |
| 204754_at    | HLF       | -1,353583928 | -1,738067356 | 0,384483428 |  |
| 206634_at    | SIX3      | -1,353583928 | -1,738067356 | 0,384483428 |  |
| 207793_s_at  | EPB41     | -1,353583928 | -1,738067356 | 0,384483428 |  |
| 214979_at    | -         | -1,353583928 | -1,738067356 | 0,384483428 |  |
| 224085_at    | -         | -1,353583928 | -1,738067356 | 0,384483428 |  |
| 229029_at    | CAMK4     | -1,353583928 | -1,738067356 | 0,384483428 |  |
| 232111_at    | LINC00617 | -1,353583928 | -1,738067356 | 0,384483428 |  |
| 232232_s_at  | SLC22A16  | -1,353583928 | -1,738067356 | 0,384483428 |  |
| 237370_at    | -         | -1,353583928 | -1,738067356 | 0,384483428 |  |
| 240732_at    | -         | -1,353583928 | -1,738067356 | 0,384483428 |  |
| 241002_at    | -         | -1,353583928 | -1,738067356 | 0,384483428 |  |
| 241558_at    | -         | -1,353583928 | -1,738067356 | 0,384483428 |  |
| 212133_at    | NIPA2     | 2,134723057  | 1,750261389  | 0,384461668 |  |
| 1552510_at   | SLC34A3   | 2,705069849  | 2,320681318  | 0,384388531 |  |
| 228974_at    | -         | 2,705069849  | 2,320681318  | 0,384388531 |  |
| 201745_at    | TWF1      | 2,675004741  | 2,290658654  | 0,384346087 |  |
| 238594_x_at  | DUSP8     | 1,742232072  | 1,3579181    | 0,384313972 |  |
| 218303_x_at  | KRCC1     | 2,644299732  | 2,259997914  | 0,384301818 |  |
| 205288_at    | CDC14A    | 0,841135803  | 0,456918297  | 0,384217506 |  |
| 239873_at    | -         | 0,841135803  | 0,456918297  | 0,384217506 |  |
| 1554177_a_at | ATP5S     | 1,621313976  | 1,23718272   | 0,384131257 |  |
| 203677_s_at  | TARBP2    | 2,621710292  | 2,237691445  | 0,384018846 |  |
| 219793_at    | SNX16     | 0,541261317  | 0,157549243  | 0,383712074 |  |
| 223744_s_at  | SIAE      | 0,541261317  | 0,157549243  | 0,383712074 |  |
| 244251_at    | LCP2      | 0,541261317  | 0,157549243  | 0,383712074 |  |
| 221435_x_at  | HYI       | 1,305306849  | 0,921731975  | 0,383574874 |  |
| 202945_at    | FPGS      | 1,575032557  | 1,191491281  | 0,383541276 |  |
| 1559748_at   | ADAMTSL3  | -0,078265071 | -0,461594427 | 0,383329355 |  |
| 205752_s_at  | GSTM5     | -0,078265071 | -0,461594427 | 0,383329355 |  |
| 210440_s_at  | CDC14A    | -0,078265071 | -0,461594427 | 0,383329355 |  |
| 221450_x_at  | PCDHB13   | -0,078265071 | -0,461594427 | 0,383329355 |  |
| 205198_s_at  | ATP7A     | 1,139070151  | 0,755840599  | 0,383229551 |  |
| 229298_at    | KBTBD7    | 0,760715727  | 0,377530647  | 0,38318508  |  |
| 233729_at    | -         | 0,246434561  | -0,136643983 | 0,383078544 |  |
| 242607_at    | -         | 0,246434561  | -0,136643983 | 0,383078544 |  |
| 242743_at    | IL4R      | 0,246434561  | -0,136643983 | 0,383078544 |  |

|              |                 |              |              |             |  |
|--------------|-----------------|--------------|--------------|-------------|--|
| 243001_at    | RBFA            | 0,246434561  | -0,136643983 | 0,383078544 |  |
| 207358_x_at  | MACF1           | 3,402980973  | 3,019999252  | 0,382981721 |  |
| 224996_at    | ASPH            | 1,937784532  | 1,55481039   | 0,382974141 |  |
| 204807_at    | TMEM5           | 2,048758794  | 1,665902186  | 0,382856609 |  |
| 202064_s_at  | SEL1L           | 1,247462054  | 0,864649967  | 0,382812086 |  |
| 226688_at    | C3orf23         | 1,247462054  | 0,864649967  | 0,382812086 |  |
| 238700_at    | PIAS2           | 1,247462054  | 0,864649967  | 0,382812086 |  |
| 34846_at     | CAMK2B          | 1,650791465  | 1,268326995  | 0,38246447  |  |
| 1559515_at   | -               | -2,756478458 | -3,138626879 | 0,382148421 |  |
| 206627_s_at  | SSX1            | -2,756478458 | -3,138626879 | 0,382148421 |  |
| 236404_at    | -               | -2,756478458 | -3,138626879 | 0,382148421 |  |
| 237884_x_at  | TRPM7           | -2,756478458 | -3,138626879 | 0,382148421 |  |
| 238673_at    | SAMD12          | -2,756478458 | -3,138626879 | 0,382148421 |  |
| 242604_at    | -               | -2,756478458 | -3,138626879 | 0,382148421 |  |
| 228041_at    | AASDH           | 1,369290453  | 0,987376598  | 0,381913855 |  |
| 1555105_a_at | MIER1           | 1,331241794  | 0,949447784  | 0,38179401  |  |
| 222621_at    | DNAJC1          | 1,331241794  | 0,949447784  | 0,38179401  |  |
| 225107_at    | HNRNPA2B1       | 2,967339888  | 2,585563171  | 0,381776717 |  |
| 220681_at    | C22orf26        | 1,05337236   | 0,67181667   | 0,38155569  |  |
| 221220_s_at  | SCYL2           | 1,05337236   | 0,67181667   | 0,38155569  |  |
| 209073_s_at  | NUMB            | 2,830080806  | 2,448549499  | 0,381531307 |  |
| 1554181_at   | SNX32           | -0,43775896  | -0,819238336 | 0,381479376 |  |
| 219735_s_at  | TFCP2L1         | -0,43775896  | -0,819238336 | 0,381479376 |  |
| 227381_at    | CERCAM          | -0,43775896  | -0,819238336 | 0,381479376 |  |
| 234515_at    | PCGEM1          | -0,43775896  | -0,819238336 | 0,381479376 |  |
| 237438_at    | -               | -0,43775896  | -0,819238336 | 0,381479376 |  |
| 241784_x_at  | HELQ            | -0,43775896  | -0,819238336 | 0,381479376 |  |
| 201772_at    | AZIN1           | 5,185541222  | 4,804227461  | 0,381313761 |  |
| 1558897_at   | PLK5            | 0,123193849  | -0,258114234 | 0,381308083 |  |
| 220712_at    | C8orf60         | 0,123193849  | -0,258114234 | 0,381308083 |  |
| 236982_at    | -               | 0,123193849  | -0,258114234 | 0,381308083 |  |
| 201980_s_at  | RSU1            | 4,487686025  | 4,106388091  | 0,381297935 |  |
| 221983_at    | FAM134A         | 2,472384965  | 2,091116676  | 0,381268289 |  |
| 203793_x_at  | PCGF2           | 1,168140757  | 0,786897721  | 0,381243036 |  |
| 208782_at    | FSTL1           | 1,168140757  | 0,786897721  | 0,381243036 |  |
| 229026_at    | -               | 1,381753566  | 1,000684521  | 0,381069045 |  |
| 226667_x_at  | EPN1            | 0,648296226  | 0,26733076   | 0,380965466 |  |
| 227036_at    | RASAL2          | 0,648296226  | 0,26733076   | 0,380965466 |  |
| 230766_at    | GART            | 2,201862497  | 1,820984782  | 0,380877715 |  |
| 204450_x_at  | APOA1           | 0,334552598  | -0,046302147 | 0,380854745 |  |
| 221836_s_at  | TRAPPC9         | 0,334552598  | -0,046302147 | 0,380854745 |  |
| 216739_at    | -               | 0,03125738   | -0,34958478  | 0,38084216  |  |
| 223760_s_at  | -               | 0,03125738   | -0,34958478  | 0,38084216  |  |
| 228395_at    | GLT8D1          | 0,03125738   | -0,34958478  | 0,38084216  |  |
| 231741_at    | S1PR3           | 0,03125738   | -0,34958478  | 0,38084216  |  |
| 243150_at    | -               | 0,03125738   | -0,34958478  | 0,38084216  |  |
| 225830_at    | PDZD8           | 3,164152611  | 2,783327323  | 0,380825288 |  |
| 1554741_s_at | FGF7 /// KGFLP1 | -0,299034815 | -0,679763839 | 0,380729024 |  |
| 205639_at    | AOAH            | -0,299034815 | -0,679763839 | 0,380729024 |  |
| 210107_at    | CLCA1           | -0,299034815 | -0,679763839 | 0,380729024 |  |
| 215268_at    | KIAA0754        | -0,299034815 | -0,679763839 | 0,380729024 |  |
| 220423_at    | PLA2G2D         | -0,299034815 | -0,679763839 | 0,380729024 |  |
| 223628_at    | TMEM191A        | -0,299034815 | -0,679763839 | 0,380729024 |  |
| 230714_s_at  | -               | -0,299034815 | -0,679763839 | 0,380729024 |  |
| 239928_at    | TCTN2           | -0,299034815 | -0,679763839 | 0,380729024 |  |
| 244127_at    | -               | -0,299034815 | -0,679763839 | 0,380729024 |  |

|              |                |              |              |             |  |
|--------------|----------------|--------------|--------------|-------------|--|
| 213409_s_at  | RHEB           | 0,798390451  | 0,417770464  | 0,380619987 |  |
| 215009_s_at  | THAP9-AS1      | 3,492853048  | 3,112391743  | 0,380461305 |  |
| 1553052_at   | WFDC13         | -2,930741289 | -3,311072652 | 0,380331363 |  |
| 1562656_at   | -              | -2,930741289 | -3,311072652 | 0,380331363 |  |
| 207703_at    | NLGN4Y         | -2,930741289 | -3,311072652 | 0,380331363 |  |
| 238317_x_at  | -              | -2,930741289 | -3,311072652 | 0,380331363 |  |
| 244403_at    | CRB1           | -2,930741289 | -3,311072652 | 0,380331363 |  |
| 223335_at    | TMEM69         | 4,995887722  | 4,615576224  | 0,380311498 |  |
| 211140_s_at  | CASP2          | 1,960118853  | 1,579853228  | 0,380265625 |  |
| 202932_at    | YES1           | 3,938261899  | 3,558125564  | 0,380136335 |  |
| 1558050_at   | EIF2B5         | -0,234278768 | -0,614371577 | 0,380092809 |  |
| 231987_at    | MIR143HG       | -0,234278768 | -0,614371577 | 0,380092809 |  |
| 234928_x_at  | RUNX3          | -0,234278768 | -0,614371577 | 0,380092809 |  |
| 235070_at    | RBFOX1         | -0,234278768 | -0,614371577 | 0,380092809 |  |
| 232269_x_at  | METRN          | 1,215326747  | 0,835239052  | 0,380087695 |  |
| 242895_x_at  | -              | 1,485482016  | 1,105412836  | 0,38006918  |  |
| 201092_at    | RBBP7          | 6,032283861  | 5,652346853  | 0,379937009 |  |
| 207435_s_at  | SRRM2          | 3,123915073  | 2,744302548  | 0,379612525 |  |
| 1554196_at   | IZUMO1         | -2,311268652 | -2,690860744 | 0,379592092 |  |
| 1555547_at   | -              | -2,311268652 | -2,690860744 | 0,379592092 |  |
| 1556257_at   | LOC100507322 / | -2,311268652 | -2,690860744 | 0,379592092 |  |
| 1561914_at   | -              | -2,311268652 | -2,690860744 | 0,379592092 |  |
| 1562137_at   | -              | -2,311268652 | -2,690860744 | 0,379592092 |  |
| 1569617_at   | OSBP2          | -2,311268652 | -2,690860744 | 0,379592092 |  |
| 216254_at    | PARVB          | -2,311268652 | -2,690860744 | 0,379592092 |  |
| 229824_at    | SHC3           | -2,311268652 | -2,690860744 | 0,379592092 |  |
| 233724_at    | ARNT           | -2,311268652 | -2,690860744 | 0,379592092 |  |
| 235442_at    | CXorf56        | -2,311268652 | -2,690860744 | 0,379592092 |  |
| 237918_at    | -              | -2,311268652 | -2,690860744 | 0,379592092 |  |
| 240622_at    | -              | -2,311268652 | -2,690860744 | 0,379592092 |  |
| 241320_at    | -              | -2,311268652 | -2,690860744 | 0,379592092 |  |
| 244793_at    | -              | -2,311268652 | -2,690860744 | 0,379592092 |  |
| 1558699_a_at | HERPUD2        | 0,555999837  | 0,176436073  | 0,379563764 |  |
| 1559224_at   | LCE1E          | 0,555999837  | 0,176436073  | 0,379563764 |  |
| 204919_at    | PRR4           | 0,555999837  | 0,176436073  | 0,379563764 |  |
| 243434_at    | -              | 0,911589958  | 0,532164371  | 0,379425588 |  |
| 1557966_x_at | MTERFD2        | 2,700102307  | 2,320681318  | 0,379420989 |  |
| 36830_at     | MIPEP          | 1,249730273  | 0,87046088   | 0,379269393 |  |
| 203556_at    | ZHX2           | 1,638726528  | 1,259496994  | 0,379229533 |  |
| 225161_at    | GFM1           | 3,466766854  | 3,087661492  | 0,379105362 |  |
| 218520_at    | TBK1           | 3,182077878  | 2,803210557  | 0,378867321 |  |
| 1557399_at   | LOC284009      | -1,2845686   | -1,663414495 | 0,378845894 |  |
| 1563961_at   | FHAD1          | -1,2845686   | -1,663414495 | 0,378845894 |  |
| 1564131_a_at | BSN-AS2        | -1,2845686   | -1,663414495 | 0,378845894 |  |
| 1566507_a_at | FBXO9          | -1,2845686   | -1,663414495 | 0,378845894 |  |
| 1566656_a_at | LOC100507654   | -1,2845686   | -1,663414495 | 0,378845894 |  |
| 217108_at    | -              | -1,2845686   | -1,663414495 | 0,378845894 |  |
| 221433_at    | FGF21          | -1,2845686   | -1,663414495 | 0,378845894 |  |
| 223149_s_at  | PTPN23         | -1,2845686   | -1,663414495 | 0,378845894 |  |
| 228085_at    | LOC100507419 / | -1,2845686   | -1,663414495 | 0,378845894 |  |
| 232963_at    | -              | -1,2845686   | -1,663414495 | 0,378845894 |  |
| 53071_s_at   | C17orf101      | 2,620834364  | 2,242180416  | 0,378653948 |  |
| 219865_at    | LINC00339      | 2,14450783   | 1,765933685  | 0,378574146 |  |
| 220526_s_at  | MRPL20         | 5,512036874  | 5,133591331  | 0,378445543 |  |
| 227482_at    | ADCK1          | 1,748661581  | 1,370274469  | 0,378387112 |  |
| 229000_at    | ZNF77          | 2,410880861  | 2,032717854  | 0,378163007 |  |

|              |                 |              |              |             |  |
|--------------|-----------------|--------------|--------------|-------------|--|
| 212588_at    | PTPRC           | 3,708558634  | 3,330438773  | 0,378119862 |  |
| 208438_s_at  | FGR             | -0,112808516 | -0,490927335 | 0,378118819 |  |
| 206124_s_at  | LLGL1           | 0,457392764  | 0,079428135  | 0,377964629 |  |
| 1553369_at   | FAM129C         | -0,352951799 | -0,730778808 | 0,377827009 |  |
| 210385_s_at  | ERAP1           | -0,352951799 | -0,730778808 | 0,377827009 |  |
| 219303_at    | RNF219          | 3,628024221  | 3,250254796  | 0,377769425 |  |
| 1561355_at   | LOC692247       | 0,384950573  | 0,007421914  | 0,37752866  |  |
| 216859_x_at  | -               | 0,384950573  | 0,007421914  | 0,37752866  |  |
| 228638_at    | -               | 0,384950573  | 0,007421914  | 0,37752866  |  |
| 1555343_at   | MEGF10          | -0,67289328  | -1,050406615 | 0,377513335 |  |
| 1564854_at   | -               | -0,67289328  | -1,050406615 | 0,377513335 |  |
| 208306_x_at  | HLA-DRB1 /// LO | -0,67289328  | -1,050406615 | 0,377513335 |  |
| 210400_at    | GRIN2C          | -0,67289328  | -1,050406615 | 0,377513335 |  |
| 210492_at    | MFAP3L          | -0,67289328  | -1,050406615 | 0,377513335 |  |
| 210780_at    | ESR2            | -0,67289328  | -1,050406615 | 0,377513335 |  |
| 216256_at    | GRM8            | -0,67289328  | -1,050406615 | 0,377513335 |  |
| 241514_at    | -               | -0,67289328  | -1,050406615 | 0,377513335 |  |
| 242632_at    | FGD2            | -0,67289328  | -1,050406615 | 0,377513335 |  |
| 244394_at    | -               | -0,67289328  | -1,050406615 | 0,377513335 |  |
| 225678_at    | POLR3H          | 1,114389003  | 0,73688026   | 0,377508743 |  |
| 235810_at    | ZNF182          | 1,865674241  | 1,488344553  | 0,377329688 |  |
| 200073_s_at  | HNRNPD          | 6,571751774  | 6,194681366  | 0,377070407 |  |
| 203068_at    | KLHL21          | 1,442503549  | 1,065442793  | 0,377060756 |  |
| 209729_at    | GAS2L1          | 1,406361373  | 1,029536893  | 0,37682448  |  |
| 1552758_at   | HDAC9           | -2,359436556 | -2,735862426 | 0,37642587  |  |
| 1557535_at   | PALLD           | -2,359436556 | -2,735862426 | 0,37642587  |  |
| 1558199_at   | FN1             | -2,359436556 | -2,735862426 | 0,37642587  |  |
| 1564056_at   | -               | -2,359436556 | -2,735862426 | 0,37642587  |  |
| 1569998_at   | MMD2            | -2,359436556 | -2,735862426 | 0,37642587  |  |
| 205118_at    | FPR1            | -2,359436556 | -2,735862426 | 0,37642587  |  |
| 206787_at    | BRDT            | -2,359436556 | -2,735862426 | 0,37642587  |  |
| 215506_s_at  | DIRAS3          | -2,359436556 | -2,735862426 | 0,37642587  |  |
| 215796_at    | -               | -2,359436556 | -2,735862426 | 0,37642587  |  |
| 227929_at    | LIN7A           | -2,359436556 | -2,735862426 | 0,37642587  |  |
| 232386_at    | VPS13C          | -2,359436556 | -2,735862426 | 0,37642587  |  |
| 234236_at    | AMBRA1          | -2,359436556 | -2,735862426 | 0,37642587  |  |
| 234827_at    | -               | -2,359436556 | -2,735862426 | 0,37642587  |  |
| 237605_at    | -               | -2,359436556 | -2,735862426 | 0,37642587  |  |
| 238047_at    | ARHGAP36        | -2,359436556 | -2,735862426 | 0,37642587  |  |
| 241949_at    | ACOT6           | -2,359436556 | -2,735862426 | 0,37642587  |  |
| 241815_at    | -               | 1,726031811  | 1,349621332  | 0,376410478 |  |
| 1563090_at   | CCDC33          | 0,533835206  | 0,157549243  | 0,376285963 |  |
| 222709_at    | ATG7            | 0,533835206  | 0,157549243  | 0,376285963 |  |
| 1566147_a_at | ANKRD20A12P     | -0,57445847  | -0,950686014 | 0,376227544 |  |
| 204763_s_at  | GNAO1           | -0,57445847  | -0,950686014 | 0,376227544 |  |
| 208225_at    | FGFR2           | -0,57445847  | -0,950686014 | 0,376227544 |  |
| 210484_s_at  | LOC254896 /// T | -0,57445847  | -0,950686014 | 0,376227544 |  |
| 215334_at    | EFR3B           | -0,57445847  | -0,950686014 | 0,376227544 |  |
| 220309_at    | TTC22           | -0,57445847  | -0,950686014 | 0,376227544 |  |
| 221077_at    | ARMC4           | -0,57445847  | -0,950686014 | 0,376227544 |  |
| 226471_at    | GGT7            | -0,57445847  | -0,950686014 | 0,376227544 |  |
| 227561_at    | DDR2            | -0,57445847  | -0,950686014 | 0,376227544 |  |
| 229432_at    | NAGS            | -0,57445847  | -0,950686014 | 0,376227544 |  |
| 229959_at    | CYP4V2          | -0,57445847  | -0,950686014 | 0,376227544 |  |
| 230723_at    | SPATA18         | -0,57445847  | -0,950686014 | 0,376227544 |  |
| 231170_at    | -               | -0,57445847  | -0,950686014 | 0,376227544 |  |

|              |                  |              |              |             |  |
|--------------|------------------|--------------|--------------|-------------|--|
| 233560_x_at  | MCM8             | -0,57445847  | -0,950686014 | 0,376227544 |  |
| 239951_at    | -                | -0,57445847  | -0,950686014 | 0,376227544 |  |
| 242023_at    | -                | -0,57445847  | -0,950686014 | 0,376227544 |  |
| 224367_at    | BEX2             | 3,598072957  | 3,222126232  | 0,375946725 |  |
| 226948_at    | RHBDD1           | 0,87091093   | 0,495031851  | 0,375879079 |  |
| 218766_s_at  | WARS2            | 1,352503698  | 0,976641161  | 0,375862537 |  |
| 204340_at    | TMEM187          | 0,728550685  | 0,352836757  | 0,375713928 |  |
| 1555436_a_at | AFF4             | -1,047650486 | -1,423348341 | 0,375697856 |  |
| 1559009_at   | -                | -1,047650486 | -1,423348341 | 0,375697856 |  |
| 216605_s_at  | CEACAM21         | -1,047650486 | -1,423348341 | 0,375697856 |  |
| 220847_x_at  | ZNF221           | -1,047650486 | -1,423348341 | 0,375697856 |  |
| 234898_at    | -                | -1,047650486 | -1,423348341 | 0,375697856 |  |
| 203457_at    | STX7             | 1,143956113  | 0,768343791  | 0,375612323 |  |
| 214581_x_at  | TNFRSF21         | 1,46610492   | 1,090553537  | 0,375551383 |  |
| 222397_at    | EFTUD2           | 0,273439642  | -0,102100538 | 0,37554018  |  |
| 239445_at    | -                | 0,273439642  | -0,102100538 | 0,37554018  |  |
| 1556994_at   | -                | -0,888496123 | -1,264005341 | 0,375509218 |  |
| 1559551_at   | -                | -0,888496123 | -1,264005341 | 0,375509218 |  |
| 1561976_at   | C1orf167 /// LOC | -0,888496123 | -1,264005341 | 0,375509218 |  |
| 1568971_at   | C14orf135        | -0,888496123 | -1,264005341 | 0,375509218 |  |
| 207652_s_at  | CMKLR1           | -0,888496123 | -1,264005341 | 0,375509218 |  |
| 208034_s_at  | PROZ             | -0,888496123 | -1,264005341 | 0,375509218 |  |
| 220092_s_at  | ANTXR1           | -0,888496123 | -1,264005341 | 0,375509218 |  |
| 232220_at    | S100A7A          | -0,888496123 | -1,264005341 | 0,375509218 |  |
| 232346_at    | LOC388692        | -0,888496123 | -1,264005341 | 0,375509218 |  |
| 233734_s_at  | OSBPL5           | -0,888496123 | -1,264005341 | 0,375509218 |  |
| 241214_at    | -                | -0,888496123 | -1,264005341 | 0,375509218 |  |
| 244293_at    | UQCRB            | -0,888496123 | -1,264005341 | 0,375509218 |  |
| 225686_at    | SKA2             | 3,591828571  | 3,216434104  | 0,375394467 |  |
| 203897_at    | LYRM1            | 3,335176289  | 2,959949103  | 0,375227187 |  |
| 216981_x_at  | SPN              | 2,156646206  | 1,781437557  | 0,375208649 |  |
| 225268_at    | KPNA4            | 5,089402992  | 4,714195481  | 0,375207511 |  |
| 218604_at    | LEMD3            | 3,525045272  | 3,149904996  | 0,375140277 |  |
| 220838_at    | EXD3             | 0,052199481  | -0,322870281 | 0,375069762 |  |
| 226911_at    | EGFLAM           | 0,052199481  | -0,322870281 | 0,375069762 |  |
| 1556244_s_at | LOC375196        | 0,503742507  | 0,128747141  | 0,374995367 |  |
| 215519_x_at  | SGSM3            | 0,503742507  | 0,128747141  | 0,374995367 |  |
| 228303_at    | GALNT6           | 0,503742507  | 0,128747141  | 0,374995367 |  |
| 238467_at    | -                | 0,503742507  | 0,128747141  | 0,374995367 |  |
| 1556758_at   | FAM208B          | -1,240169874 | -1,615132408 | 0,374962533 |  |
| 1561228_at   | LOC100506122     | -1,240169874 | -1,615132408 | 0,374962533 |  |
| 211380_s_at  | PRKG1            | -1,240169874 | -1,615132408 | 0,374962533 |  |
| 215992_s_at  | RAPGEF2          | -1,240169874 | -1,615132408 | 0,374962533 |  |
| 237450_at    | LOC389332        | -1,240169874 | -1,615132408 | 0,374962533 |  |
| 1554472_a_at | PHF20L1          | 0,928678725  | 0,553993624  | 0,3746851   |  |
| 218279_s_at  | HIST2H2AA3       | 0,928678725  | 0,553993624  | 0,3746851   |  |
| 213439_x_at  | RUNDC3A          | 0,792179257  | 0,417770464  | 0,374408793 |  |
| 234761_at    | -                | 0,792179257  | 0,417770464  | 0,374408793 |  |
| 235846_at    | FSBP /// RAD54B  | 1,079110292  | 0,704715219  | 0,374395073 |  |
| 1562577_at   | -                | 0,641402394  | 0,26733076   | 0,374071635 |  |
| 203377_s_at  | CDC40            | 1,542099044  | 1,16809119   | 0,374007853 |  |
| 218784_s_at  | SAYSD1           | 1,689737652  | 1,315948728  | 0,373788924 |  |
| 204699_s_at  | DIEXF            | 2,837639949  | 2,464004877  | 0,373635071 |  |
| 210766_s_at  | CSE1L            | 5,739893061  | 5,366268691  | 0,37362437  |  |
| 206544_x_at  | SMARCA2          | 1,360921491  | 0,987376598  | 0,373544894 |  |
| 226406_at    | C18orf25         | 3,301680869  | 2,928263672  | 0,373417197 |  |

|              |              |              |              |             |  |
|--------------|--------------|--------------|--------------|-------------|--|
| 213200_at    | SYP          | 0,767063567  | 0,393761504  | 0,373302063 |  |
| 219170_at    | FSD1         | 0,853119696  | 0,479907041  | 0,373212655 |  |
| 227585_at    | ATAD1        | 1,67631007   | 1,303116084  | 0,373193986 |  |
| 1564166_s_at | LOC100630923 | 0,152582607  | -0,220592223 | 0,37317483  |  |
| 210841_s_at  | NRP2         | 0,152582607  | -0,220592223 | 0,37317483  |  |
| 223519_at    | ZAK          | 0,152582607  | -0,220592223 | 0,37317483  |  |
| 218301_at    | RNPEPL1      | 1,011212064  | 0,638150376  | 0,373061688 |  |
| 219062_s_at  | ZCCHC2       | 1,85379461   | 1,480766833  | 0,373027777 |  |
| 215991_s_at  | EMC1         | 0,401366113  | 0,028364014  | 0,373002099 |  |
| 1558877_at   | -            | -1,838812296 | -2,211750327 | 0,372938031 |  |
| 1560112_at   | WDFY2        | -1,838812296 | -2,211750327 | 0,372938031 |  |
| 1568891_x_at | FANCD2       | -1,838812296 | -2,211750327 | 0,372938031 |  |
| 216990_at    | GART         | -1,838812296 | -2,211750327 | 0,372938031 |  |
| 229056_at    | -            | -1,838812296 | -2,211750327 | 0,372938031 |  |
| 229777_at    | CLRN3        | -1,838812296 | -2,211750327 | 0,372938031 |  |
| 232164_s_at  | EPPK1        | -1,838812296 | -2,211750327 | 0,372938031 |  |
| 233201_at    | -            | -1,838812296 | -2,211750327 | 0,372938031 |  |
| 233549_at    | PDE1A        | -1,838812296 | -2,211750327 | 0,372938031 |  |
| 233965_at    | TBX5-AS1     | -1,838812296 | -2,211750327 | 0,372938031 |  |
| 236901_at    | -            | -1,838812296 | -2,211750327 | 0,372938031 |  |
| 237517_at    | -            | -1,838812296 | -2,211750327 | 0,372938031 |  |
| 237557_at    | -            | -1,838812296 | -2,211750327 | 0,372938031 |  |
| 239755_at    | -            | -1,838812296 | -2,211750327 | 0,372938031 |  |
| 240842_at    | -            | -1,838812296 | -2,211750327 | 0,372938031 |  |
| 241269_at    | -            | -1,838812296 | -2,211750327 | 0,372938031 |  |
| 244806_at    | -            | -1,838812296 | -2,211750327 | 0,372938031 |  |
| 1555031_at   | -            | -1,71423189  | -2,086984744 | 0,372752854 |  |
| 1557734_s_at | LOC100130548 | -1,71423189  | -2,086984744 | 0,372752854 |  |
| 1561281_a_at | LEMD1-AS1    | -1,71423189  | -2,086984744 | 0,372752854 |  |
| 1564974_at   | KRTAP8-1     | -1,71423189  | -2,086984744 | 0,372752854 |  |
| 1570014_at   | -            | -1,71423189  | -2,086984744 | 0,372752854 |  |
| 204303_s_at  | CTIF         | -1,71423189  | -2,086984744 | 0,372752854 |  |
| 207754_at    | RASSF8       | -1,71423189  | -2,086984744 | 0,372752854 |  |
| 229398_at    | RAB18        | -1,71423189  | -2,086984744 | 0,372752854 |  |
| 230410_at    | -            | -1,71423189  | -2,086984744 | 0,372752854 |  |
| 233598_at    | -            | -1,71423189  | -2,086984744 | 0,372752854 |  |
| 235188_at    | -            | -1,71423189  | -2,086984744 | 0,372752854 |  |
| 236450_at    | -            | -1,71423189  | -2,086984744 | 0,372752854 |  |
| 239438_at    | RAPGEF6      | -1,71423189  | -2,086984744 | 0,372752854 |  |
| 210685_s_at  | UBE4B        | 1,40228911   | 1,029536893  | 0,372752216 |  |
| 212096_s_at  | MTUS1        | 3,95851035   | 3,585762986  | 0,372747365 |  |
| 215150_at    | YOD1         | 1,987559146  | 1,614891062  | 0,372668085 |  |
| 226317_at    | PPP4R2       | 2,450859799  | 2,078620836  | 0,372238963 |  |
| 1554517_x_at | LINC00537    | 0,82905153   | 0,456918297  | 0,372133233 |  |
| 220150_s_at  | FAM184A      | 1,063722698  | 0,691645685  | 0,372077012 |  |
| 1556035_s_at | ZNF207       | 1,549482847  | 1,177496821  | 0,371986026 |  |
| 212054_x_at  | TBC1D9B      | 1,549482847  | 1,177496821  | 0,371986026 |  |
| 222129_at    | FAM134A      | 2,064305961  | 1,692388143  | 0,371917818 |  |
| 205275_at    | GTPBP1       | -0,089689931 | -0,461594427 | 0,371904495 |  |
| 209182_s_at  | C10orf10     | -0,089689931 | -0,461594427 | 0,371904495 |  |
| 219456_s_at  | RIN3         | -0,089689931 | -0,461594427 | 0,371904495 |  |
| 221440_s_at  | RBBP9        | -0,089689931 | -0,461594427 | 0,371904495 |  |
| 203935_at    | ACVR1        | 3,484209953  | 3,112391743  | 0,37181821  |  |
| 202158_s_at  | CELF2        | 3,453052675  | 3,081412119  | 0,371640556 |  |
| 234947_s_at  | FAM204A      | 2,462640593  | 2,091116676  | 0,371523917 |  |
| 1552415_a_at | WFDC9        | -0,741668563 | -1,112851844 | 0,371183281 |  |



|              |                 |              |              |             |  |
|--------------|-----------------|--------------|--------------|-------------|--|
| 210716_s_at  | CLIP1           | -0,741668563 | -1,112851844 | 0,371183281 |  |
| 218747_s_at  | TAPBPL          | -0,741668563 | -1,112851844 | 0,371183281 |  |
| 221157_s_at  | FBXO24          | -0,741668563 | -1,112851844 | 0,371183281 |  |
| 229222_at    | ACSS3           | -0,741668563 | -1,112851844 | 0,371183281 |  |
| 229702_at    | CSNK1G3         | -0,741668563 | -1,112851844 | 0,371183281 |  |
| 224957_at    | C1orf32 /// RPL | 3,154500615  | 2,783327323  | 0,371173292 |  |
| 235707_at    | C6orf228        | 0,888485433  | 0,51742585   | 0,371059583 |  |
| 1566577_at   | -               | -1,964176657 | -2,335104118 | 0,370927461 |  |
| 202953_at    | C1QB            | -1,964176657 | -2,335104118 | 0,370927461 |  |
| 204515_at    | HSD3B1          | -1,964176657 | -2,335104118 | 0,370927461 |  |
| 204580_at    | MMP12           | -1,964176657 | -2,335104118 | 0,370927461 |  |
| 205715_at    | BST1            | -1,964176657 | -2,335104118 | 0,370927461 |  |
| 208462_s_at  | ABCC9           | -1,964176657 | -2,335104118 | 0,370927461 |  |
| 219497_s_at  | BCL11A          | -1,964176657 | -2,335104118 | 0,370927461 |  |
| 222098_s_at  | -               | -1,964176657 | -2,335104118 | 0,370927461 |  |
| 226344_at    | ZMAT1           | -1,964176657 | -2,335104118 | 0,370927461 |  |
| 231289_at    | -               | -1,964176657 | -2,335104118 | 0,370927461 |  |
| 231797_at    | SIX4            | -1,964176657 | -2,335104118 | 0,370927461 |  |
| 232999_at    | -               | -1,964176657 | -2,335104118 | 0,370927461 |  |
| 233171_at    | GRIN3A          | -1,964176657 | -2,335104118 | 0,370927461 |  |
| 237312_at    | LOC100506272    | -1,964176657 | -2,335104118 | 0,370927461 |  |
| 237645_at    | LOC100506577    | -1,964176657 | -2,335104118 | 0,370927461 |  |
| 238564_at    | FAM171B         | -1,964176657 | -2,335104118 | 0,370927461 |  |
| 241176_at    | -               | -1,964176657 | -2,335104118 | 0,370927461 |  |
| 204918_s_at  | MLLT3           | 2,882181479  | 2,511262629  | 0,370918849 |  |
| 231772_x_at  | CENPH           | 3,25953187   | 2,888726553  | 0,370805317 |  |
| 203504_s_at  | ABCA1           | -0,394749123 | -0,765504029 | 0,370754906 |  |
| 219534_x_at  | CDKN1C          | -0,394749123 | -0,765504029 | 0,370754906 |  |
| 238820_at    | TMEM229B        | -0,394749123 | -0,765504029 | 0,370754906 |  |
| 241818_at    | -               | -0,394749123 | -0,765504029 | 0,370754906 |  |
| 1559865_at   | -               | -2,667025278 | -3,037500868 | 0,370475591 |  |
| 1562341_at   | -               | -2,667025278 | -3,037500868 | 0,370475591 |  |
| 1570366_x_at | ZNF709          | -2,667025278 | -3,037500868 | 0,370475591 |  |
| 205694_at    | TYRP1           | -2,667025278 | -3,037500868 | 0,370475591 |  |
| 210837_s_at  | PDE4D           | -2,667025278 | -3,037500868 | 0,370475591 |  |
| 211522_s_at  | GNRHR           | -2,667025278 | -3,037500868 | 0,370475591 |  |
| 213362_at    | PTPRD           | -2,667025278 | -3,037500868 | 0,370475591 |  |
| 231385_at    | DPPA3           | -2,667025278 | -3,037500868 | 0,370475591 |  |
| 239904_at    | -               | -2,667025278 | -3,037500868 | 0,370475591 |  |
| 241638_at    | -               | -2,667025278 | -3,037500868 | 0,370475591 |  |
| 242649_x_at  | HMG2P46         | -2,667025278 | -3,037500868 | 0,370475591 |  |
| 243406_at    | TMCO5B          | -2,667025278 | -3,037500868 | 0,370475591 |  |
| 201266_at    | TXNRD1          | 4,713590151  | 4,343149918  | 0,370440232 |  |
| 228633_s_at  | CNTROB          | 1,292162421  | 0,921731975  | 0,370430446 |  |
| 221531_at    | WDR61           | 4,020928202  | 3,650516168  | 0,370412034 |  |
| 202714_s_at  | KIAA0391        | 0,747935635  | 0,377530647  | 0,370404989 |  |
| 1563657_at   | PLXND1          | 0,020670649  | -0,34958478  | 0,37025543  |  |
| 217284_x_at  | SERHL2          | 0,020670649  | -0,34958478  | 0,37025543  |  |
| 223282_at    | TSHZ1           | 0,020670649  | -0,34958478  | 0,37025543  |  |
| 239642_at    | -               | 0,020670649  | -0,34958478  | 0,37025543  |  |
| 1554067_at   | C12orf66        | -1,591296941 | -1,961547147 | 0,370250206 |  |
| 1561668_at   | -               | -1,591296941 | -1,961547147 | 0,370250206 |  |
| 205330_at    | MN1             | -1,591296941 | -1,961547147 | 0,370250206 |  |
| 215964_at    | -               | -1,591296941 | -1,961547147 | 0,370250206 |  |
| 217484_at    | CR1             | -1,591296941 | -1,961547147 | 0,370250206 |  |
| 220259_at    | PLEKHH3         | -1,591296941 | -1,961547147 | 0,370250206 |  |

|              |              |              |              |             |  |
|--------------|--------------|--------------|--------------|-------------|--|
| 231881_at    | CALD1        | -1,591296941 | -1,961547147 | 0,370250206 |  |
| 232040_at    | LOC157860    | -1,591296941 | -1,961547147 | 0,370250206 |  |
| 235281_x_at  | AHNAK        | -1,591296941 | -1,961547147 | 0,370250206 |  |
| 237897_at    | ADAM17       | -1,591296941 | -1,961547147 | 0,370250206 |  |
| 238634_x_at  | -            | -1,591296941 | -1,961547147 | 0,370250206 |  |
| 222762_x_at  | LIMD1        | 1,748661581  | 1,378453643  | 0,370207938 |  |
| 228255_at    | TMEM237      | -0,196756757 | -0,566887459 | 0,370130702 |  |
| 239235_at    | -            | -0,196756757 | -0,566887459 | 0,370130702 |  |
| 242556_at    | -            | -0,196756757 | -0,566887459 | 0,370130702 |  |
| 242782_x_at  | TMEM198      | -0,196756757 | -0,566887459 | 0,370130702 |  |
| 244271_at    | -            | -0,196756757 | -0,566887459 | 0,370130702 |  |
| 221761_at    | ADSS         | 3,628024221  | 3,258033502  | 0,369990719 |  |
| 1561699_a_at | -            | -2,866296344 | -3,236070201 | 0,369773857 |  |
| 234313_at    | NCOR1        | -2,866296344 | -3,236070201 | 0,369773857 |  |
| 243247_at    | -            | -2,866296344 | -3,236070201 | 0,369773857 |  |
| 206220_s_at  | RASA3        | 0,209623097  | -0,160136748 | 0,369759846 |  |
| 228573_at    | ANTXR2       | 1,274448124  | 0,904843258  | 0,369604866 |  |
| 224828_at    | CPEB4        | 0,97328325   | 0,603679647  | 0,369603603 |  |
| 224597_at    | LOC647979    | 6,177257557  | 5,807870843  | 0,369386714 |  |
| 225219_at    | SMAD5        | 1,593009234  | 1,223626587  | 0,369382647 |  |
| 226268_at    | RAB21        | 1,593009234  | 1,223626587  | 0,369382647 |  |
| 226426_at    | ADNP         | 2,908260915  | 2,538891651  | 0,369369264 |  |
| 1560596_at   | -            | -0,85085127  | -1,220210588 | 0,369359318 |  |
| 1561373_at   | PACRG-AS1    | -0,85085127  | -1,220210588 | 0,369359318 |  |
| 203325_s_at  | COL5A1       | -0,85085127  | -1,220210588 | 0,369359318 |  |
| 209293_x_at  | ID4          | -0,85085127  | -1,220210588 | 0,369359318 |  |
| 217338_at    | KRT19P2      | -0,85085127  | -1,220210588 | 0,369359318 |  |
| 223137_at    | ZDHC4        | -0,85085127  | -1,220210588 | 0,369359318 |  |
| 226075_at    | SPSB1        | -0,85085127  | -1,220210588 | 0,369359318 |  |
| 229990_at    | TSC22D1-AS1  | -0,85085127  | -1,220210588 | 0,369359318 |  |
| 234466_at    | FAM20C       | -0,85085127  | -1,220210588 | 0,369359318 |  |
| 236399_at    | -            | -0,85085127  | -1,220210588 | 0,369359318 |  |
| 241609_at    | FOXD3        | -0,85085127  | -1,220210588 | 0,369359318 |  |
| 211703_s_at  | TM2D1        | 2,618203384  | 2,248887791  | 0,369315593 |  |
| 1562391_at   | B3GALNT2     | -0,543051993 | -0,912331589 | 0,369279596 |  |
| 202237_at    | NNMT         | -0,543051993 | -0,912331589 | 0,369279596 |  |
| 206896_s_at  | GNG7         | -0,543051993 | -0,912331589 | 0,369279596 |  |
| 214762_at    | ATP6V1G2     | -0,543051993 | -0,912331589 | 0,369279596 |  |
| 217337_at    | -            | -0,543051993 | -0,912331589 | 0,369279596 |  |
| 221717_at    | -            | -0,543051993 | -0,912331589 | 0,369279596 |  |
| 229016_s_at  | TRERF1       | -0,543051993 | -0,912331589 | 0,369279596 |  |
| 230300_at    | PSMA5        | -0,543051993 | -0,912331589 | 0,369279596 |  |
| 236394_at    | A2MP1        | -0,543051993 | -0,912331589 | 0,369279596 |  |
| 217757_at    | A2M          | 0,376672223  | 0,007421914  | 0,36925031  |  |
| 221237_s_at  | OSBP2        | 0,376672223  | 0,007421914  | 0,36925031  |  |
| 202453_s_at  | GTF2H1       | 2,327437554  | 1,958277216  | 0,369160338 |  |
| 214934_at    | ATP9B        | 1,434549838  | 1,065442793  | 0,369107045 |  |
| 221192_x_at  | MFSD11       | 1,434549838  | 1,065442793  | 0,369107045 |  |
| 229318_at    | -            | 1,767779954  | 1,398700978  | 0,369078976 |  |
| 227583_at    | POP4         | 2,936695663  | 2,567790814  | 0,368904849 |  |
| 1557796_at   | FAR2         | -1,543331864 | -1,912089812 | 0,368757947 |  |
| 1559298_a_at | FLJ42289     | -1,543331864 | -1,912089812 | 0,368757947 |  |
| 1560412_at   | LOC100507506 | -1,543331864 | -1,912089812 | 0,368757947 |  |
| 1561062_a_at | -            | -1,543331864 | -1,912089812 | 0,368757947 |  |
| 1569245_at   | C8orf74      | -1,543331864 | -1,912089812 | 0,368757947 |  |
| 1570566_at   | -            | -1,543331864 | -1,912089812 | 0,368757947 |  |

|              |                  |              |              |             |  |
|--------------|------------------|--------------|--------------|-------------|--|
| 207899_at    | GIP              | -1,543331864 | -1,912089812 | 0,368757947 |  |
| 216729_at    | -                | -1,543331864 | -1,912089812 | 0,368757947 |  |
| 220112_at    | ANKRD55          | -1,543331864 | -1,912089812 | 0,368757947 |  |
| 223835_x_at  | OTP              | -1,543331864 | -1,912089812 | 0,368757947 |  |
| 230487_at    | C6orf99          | -1,543331864 | -1,912089812 | 0,368757947 |  |
| 230514_s_at  | LYZL1 /// LYZL2  | -1,543331864 | -1,912089812 | 0,368757947 |  |
| 232535_at    | -                | -1,543331864 | -1,912089812 | 0,368757947 |  |
| 234831_at    | -                | -1,543331864 | -1,912089812 | 0,368757947 |  |
| 236222_at    | C3orf15 /// LOC1 | -1,543331864 | -1,912089812 | 0,368757947 |  |
| 241108_at    | -                | -1,543331864 | -1,912089812 | 0,368757947 |  |
| 241321_at    | -                | -1,543331864 | -1,912089812 | 0,368757947 |  |
| 242027_at    | -                | -1,543331864 | -1,912089812 | 0,368757947 |  |
| 232635_at    | CEP128           | 1,027166904  | 0,658444279  | 0,368722625 |  |
| 223417_at    | RAD18            | 1,69307511   | 1,324440845  | 0,368634265 |  |
| 224159_x_at  | TRIM4            | 1,69307511   | 1,324440845  | 0,368634265 |  |
| 1569206_at   | TCP11L2          | 0,661985843  | 0,293518836  | 0,368467007 |  |
| 44065_at     | C12orf52         | 1,66275634   | 1,294497133  | 0,368259207 |  |
| 204564_at    | PCGF3            | -0,022466681 | -0,39061235  | 0,368145669 |  |
| 239801_at    | RNF40            | -0,022466681 | -0,39061235  | 0,368145669 |  |
| 1565857_at   | -                | -1,173767127 | -1,541908042 | 0,368140915 |  |
| 1570350_at   | LOC100506403 /   | -1,173767127 | -1,541908042 | 0,368140915 |  |
| 207032_s_at  | CRISP1           | -1,173767127 | -1,541908042 | 0,368140915 |  |
| 210072_at    | CCL19            | -1,173767127 | -1,541908042 | 0,368140915 |  |
| 210331_at    | HECW1            | -1,173767127 | -1,541908042 | 0,368140915 |  |
| 211869_at    | -                | -1,173767127 | -1,541908042 | 0,368140915 |  |
| 212067_s_at  | C1R              | -1,173767127 | -1,541908042 | 0,368140915 |  |
| 214520_at    | FOXC2            | -1,173767127 | -1,541908042 | 0,368140915 |  |
| 217034_at    | -                | -1,173767127 | -1,541908042 | 0,368140915 |  |
| 232170_at    | S100A7A          | -1,173767127 | -1,541908042 | 0,368140915 |  |
| 233771_at    | -                | -1,173767127 | -1,541908042 | 0,368140915 |  |
| 234292_s_at  | ZNF167           | -1,173767127 | -1,541908042 | 0,368140915 |  |
| 236140_at    | GCLM             | -1,173767127 | -1,541908042 | 0,368140915 |  |
| 236554_x_at  | TMC8             | -1,173767127 | -1,541908042 | 0,368140915 |  |
| 242019_at    | CERS6            | -1,173767127 | -1,541908042 | 0,368140915 |  |
| 208674_x_at  | DDOST            | 4,895888063  | 4,527755823  | 0,36813224  |  |
| 200675_at    | CD81             | 5,536859965  | 5,168796961  | 0,368063003 |  |
| 205830_at    | CLGN             | 2,102456302  | 1,73441697   | 0,368039332 |  |
| 241215_at    | -                | 0,171847695  | -0,19610998  | 0,367957675 |  |
| 1568954_s_at | C16orf72         | 2,420979937  | 2,053299695  | 0,367680241 |  |
| 213628_at    | CLCC1            | 2,173470163  | 1,805902329  | 0,367567834 |  |
| 227718_at    | PURB             | 2,173470163  | 1,805902329  | 0,367567834 |  |
| 213192_at    | THAP3            | 1,104397092  | 0,73688026   | 0,367516831 |  |
| 212927_at    | SMC5             | 3,173740462  | 2,806245339  | 0,367495123 |  |
| 204614_at    | SERPINB2         | 3,234554895  | 2,867091644  | 0,367463251 |  |
| 202495_at    | TBCC             | 3,397876879  | 3,030417996  | 0,367458883 |  |
| 1552514_at   | WBP2NL           | -2,479842156 | -2,847001814 | 0,367159658 |  |
| 1557733_a_at | CHRM3-AS2        | -2,479842156 | -2,847001814 | 0,367159658 |  |
| 1558857_at   | -                | -2,479842156 | -2,847001814 | 0,367159658 |  |
| 1560416_at   | DNAH11           | -2,479842156 | -2,847001814 | 0,367159658 |  |
| 1562189_at   | -                | -2,479842156 | -2,847001814 | 0,367159658 |  |
| 1566449_at   | LRRC40           | -2,479842156 | -2,847001814 | 0,367159658 |  |
| 1568916_at   | SPIRE2           | -2,479842156 | -2,847001814 | 0,367159658 |  |
| 210000_s_at  | SOCS1            | -2,479842156 | -2,847001814 | 0,367159658 |  |
| 223815_at    | CEP95            | -2,479842156 | -2,847001814 | 0,367159658 |  |
| 227439_at    | ANKS1B           | -2,479842156 | -2,847001814 | 0,367159658 |  |
| 233534_at    | KRTAP3-2         | -2,479842156 | -2,847001814 | 0,367159658 |  |

|              |                |              |              |             |  |
|--------------|----------------|--------------|--------------|-------------|--|
| 234213_at    | -              | -2,479842156 | -2,847001814 | 0,367159658 |  |
| 235578_at    | ABCC9          | -2,479842156 | -2,847001814 | 0,367159658 |  |
| 239999_at    | LINC00478      | -2,479842156 | -2,847001814 | 0,367159658 |  |
| 242107_x_at  | -              | -2,479842156 | -2,847001814 | 0,367159658 |  |
| 244454_at    | -              | -2,479842156 | -2,847001814 | 0,367159658 |  |
| 203572_s_at  | TAF6           | 2,28383338   | 1,916759838  | 0,367073542 |  |
| 212647_at    | RRAS           | 0,95671774   | 0,589657387  | 0,367060353 |  |
| 64371_at     | SUGP2          | 1,714582406  | 1,347539663  | 0,367042743 |  |
| 223576_at    | C6orf203       | 2,943717636  | 2,576704359  | 0,367013277 |  |
| 216976_s_at  | RYK            | 1,903621061  | 1,536652708  | 0,366968354 |  |
| 222509_s_at  | ZNF672         | 0,760715727  | 0,393761504  | 0,366954222 |  |
| 1554742_at   | PMS1           | -2,089474779 | -2,456406426 | 0,366931647 |  |
| 1555836_at   | POLR2B         | -2,089474779 | -2,456406426 | 0,366931647 |  |
| 1556122_at   | RAB11B-AS1     | -2,089474779 | -2,456406426 | 0,366931647 |  |
| 1560556_a_at | PLEKHA8        | -2,089474779 | -2,456406426 | 0,366931647 |  |
| 1563361_at   | RNF216         | -2,089474779 | -2,456406426 | 0,366931647 |  |
| 1564351_at   | -              | -2,089474779 | -2,456406426 | 0,366931647 |  |
| 1567139_at   | -              | -2,089474779 | -2,456406426 | 0,366931647 |  |
| 1569554_at   | ESR2           | -2,089474779 | -2,456406426 | 0,366931647 |  |
| 203066_at    | CHST15         | -2,089474779 | -2,456406426 | 0,366931647 |  |
| 206841_at    | PDE6H          | -2,089474779 | -2,456406426 | 0,366931647 |  |
| 208399_s_at  | EDN3           | -2,089474779 | -2,456406426 | 0,366931647 |  |
| 230351_at    | LOC283481      | -2,089474779 | -2,456406426 | 0,366931647 |  |
| 233452_at    | -              | -2,089474779 | -2,456406426 | 0,366931647 |  |
| 237888_at    | LOC100422737   | -2,089474779 | -2,456406426 | 0,366931647 |  |
| 238386_x_at  | -              | -2,089474779 | -2,456406426 | 0,366931647 |  |
| 238964_at    | FIGN           | -2,089474779 | -2,456406426 | 0,366931647 |  |
| 240173_at    | -              | -2,089474779 | -2,456406426 | 0,366931647 |  |
| 240197_at    | SYN2           | -2,089474779 | -2,456406426 | 0,366931647 |  |
| 242089_at    | -              | -2,089474779 | -2,456406426 | 0,366931647 |  |
| 243761_at    | CLDN12         | -2,089474779 | -2,456406426 | 0,366931647 |  |
| 201116_s_at  | CPE            | 1,153678675  | 0,786897721  | 0,366780954 |  |
| 223471_at    | RAB3IP         | 1,153678675  | 0,786897721  | 0,366780954 |  |
| 244804_at    | SQSTM1         | 0,083054335  | -0,283667828 | 0,366722162 |  |
| 219809_at    | WDR55          | 2,232003119  | 1,865308541  | 0,366694578 |  |
| 238561_s_at  | UTP23          | 1,603688695  | 1,23718272   | 0,366505975 |  |
| 203517_at    | MTX2           | 4,19991587   | 3,833443169  | 0,366472701 |  |
| 223780_s_at  | MED13          | 0,425644434  | 0,059218869  | 0,366425565 |  |
| 237024_at    | C3orf45        | 0,425644434  | 0,059218869  | 0,366425565 |  |
| 225985_at    | PRKAA1         | 0,57058931   | 0,204310755  | 0,366278555 |  |
| 233638_s_at  | POMGNT1        | 0,57058931   | 0,204310755  | 0,366278555 |  |
| 212065_s_at  | USP34          | 0,702292136  | 0,336136178  | 0,366155958 |  |
| 219538_at    | WDR5B          | 0,702292136  | 0,336136178  | 0,366155958 |  |
| 232014_at    | ZNF30          | 2,501229299  | 2,135226207  | 0,366003092 |  |
| 213734_at    | RFC5           | 3,469688722  | 3,103784293  | 0,36590443  |  |
| 226608_at    | C16orf87       | 1,446464021  | 1,080561626  | 0,365902395 |  |
| 1567079_at   | CLN6           | 1,037706275  | 0,67181667   | 0,365889605 |  |
| 228972_at    | PITPNA-AS1     | 1,85379461   | 1,488344553  | 0,365450057 |  |
| 231832_at    | GALNT4 /// POC | 1,90937145   | 1,543943227  | 0,365428223 |  |
| 1554342_s_at | HELQ           | 1,089278259  | 0,724100169  | 0,36517809  |  |
| 213457_at    | MFHAS1         | 1,269985355  | 0,904843258  | 0,365142096 |  |
| 1555086_at   | STAT5B         | 1,352503698  | 0,987376598  | 0,365127101 |  |
| 226183_at    | GSK3B          | 1,352503698  | 0,987376598  | 0,365127101 |  |
| 226279_at    | PRSS23         | 3,237986416  | 2,87289275   | 0,365093666 |  |
| 1555925_at   | -              | -2,908843709 | -3,273861381 | 0,365017673 |  |
| 1561170_at   | GOLGA6L1 /// G | -2,908843709 | -3,273861381 | 0,365017673 |  |

|              |                |              |              |             |  |
|--------------|----------------|--------------|--------------|-------------|--|
| 231453_at    | C17orf105      | -2,908843709 | -3,273861381 | 0,365017673 |  |
| 223077_at    | TMOD3          | 3,22766727   | 2,862725455  | 0,364941814 |  |
| 1553426_at   | C5orf64        | -2,138804305 | -2,503677622 | 0,364873317 |  |
| 1557993_at   | -              | -2,138804305 | -2,503677622 | 0,364873317 |  |
| 206269_at    | GCM1           | -2,138804305 | -2,503677622 | 0,364873317 |  |
| 207735_at    | RNF125         | -2,138804305 | -2,503677622 | 0,364873317 |  |
| 208790_s_at  | PTRF           | -2,138804305 | -2,503677622 | 0,364873317 |  |
| 209010_s_at  | TRIO           | -2,138804305 | -2,503677622 | 0,364873317 |  |
| 216939_s_at  | HTR4           | -2,138804305 | -2,503677622 | 0,364873317 |  |
| 228557_at    | L3MBTL4        | -2,138804305 | -2,503677622 | 0,364873317 |  |
| 235321_at    | NDUFS1         | -2,138804305 | -2,503677622 | 0,364873317 |  |
| 236729_at    | -              | -2,138804305 | -2,503677622 | 0,364873317 |  |
| 240992_at    | -              | -2,138804305 | -2,503677622 | 0,364873317 |  |
| 213693_s_at  | MUC1           | 0,798390451  | 0,433557298  | 0,364833153 |  |
| 235830_at    | -              | 0,798390451  | 0,433557298  | 0,364833153 |  |
| 1557701_s_at | POLH           | 0,228146222  | -0,136643983 | 0,364790204 |  |
| 1569515_a_at | -              | 0,228146222  | -0,136643983 | 0,364790204 |  |
| 204974_at    | RAB3A          | 0,228146222  | -0,136643983 | 0,364790204 |  |
| 210925_at    | CIITA          | 0,228146222  | -0,136643983 | 0,364790204 |  |
| 211728_s_at  | HYAL3          | 0,228146222  | -0,136643983 | 0,364790204 |  |
| 223677_at    | ATG10          | 0,228146222  | -0,136643983 | 0,364790204 |  |
| 226665_at    | AHSA2          | 0,228146222  | -0,136643983 | 0,364790204 |  |
| 236751_at    | -              | 0,228146222  | -0,136643983 | 0,364790204 |  |
| 209404_s_at  | TMED7 /// TMED | 3,687797371  | 3,323041804  | 0,364755567 |  |
| 219558_at    | ATP13A3        | 1,394109935  | 1,029536893  | 0,364573042 |  |
| 225580_at    | MRPL50         | 3,819603766  | 3,455550298  | 0,364053467 |  |
| 201879_at    | ARIH1          | 1,844820248  | 1,480766833  | 0,364053415 |  |
| 1555125_at   | GCFC1          | 0,859074518  | 0,495031851  | 0,364042668 |  |
| 206997_s_at  | HS6ST1         | -0,366776884 | -0,730778808 | 0,364001924 |  |
| 210161_at    | -              | -0,366776884 | -0,730778808 | 0,364001924 |  |
| 216950_s_at  | FCGR1A /// FCG | -0,366776884 | -0,730778808 | 0,364001924 |  |
| 227240_at    | NGEF           | -0,366776884 | -0,730778808 | 0,364001924 |  |
| 233299_at    | RIMS4          | -0,366776884 | -0,730778808 | 0,364001924 |  |
| 234308_at    | TUBGCP6        | -0,366776884 | -0,730778808 | 0,364001924 |  |
| 234376_at    | MYCN           | -0,366776884 | -0,730778808 | 0,364001924 |  |
| 235797_x_at  | HMCN2          | -0,366776884 | -0,730778808 | 0,364001924 |  |
| 211352_s_at  | NCOA3          | 0,613492853  | 0,249604176  | 0,363888677 |  |
| 1560386_at   | -              | -0,172274514 | -0,536087151 | 0,363812637 |  |
| 205360_at    | PFDN4          | -0,172274514 | -0,536087151 | 0,363812637 |  |
| 206851_at    | RNASE3         | -0,172274514 | -0,536087151 | 0,363812637 |  |
| 221068_at    | KANK2          | -0,172274514 | -0,536087151 | 0,363812637 |  |
| 213891_s_at  | TCF4           | 2,671625168  | 2,307890888  | 0,36373428  |  |
| 1554821_a_at | ZBED1          | 0,317354302  | -0,046302147 | 0,363656449 |  |
| 1566178_x_at | -              | 0,317354302  | -0,046302147 | 0,363656449 |  |
| 220616_at    | ZNF384         | 0,317354302  | -0,046302147 | 0,363656449 |  |
| 227841_at    | AMDHD2 /// CEM | 0,317354302  | -0,046302147 | 0,363656449 |  |
| 209735_at    | ABCG2          | -1,131062212 | -1,494668682 | 0,363606469 |  |
| 211030_s_at  | SLC6A6         | -1,131062212 | -1,494668682 | 0,363606469 |  |
| 214470_at    | KLRB1          | -1,131062212 | -1,494668682 | 0,363606469 |  |
| 214978_s_at  | PPFIA4         | -1,131062212 | -1,494668682 | 0,363606469 |  |
| 216726_at    | VENTXP1        | -1,131062212 | -1,494668682 | 0,363606469 |  |
| 223930_at    | -              | -1,131062212 | -1,494668682 | 0,363606469 |  |
| 228042_at    | ADPRH          | -1,131062212 | -1,494668682 | 0,363606469 |  |
| 228865_at    | C1orf116       | -1,131062212 | -1,494668682 | 0,363606469 |  |
| 232793_at    | -              | -1,131062212 | -1,494668682 | 0,363606469 |  |
| 233174_at    | LOC100287015   | -1,131062212 | -1,494668682 | 0,363606469 |  |

|              |                 |              |              |             |  |
|--------------|-----------------|--------------|--------------|-------------|--|
| 234718_at    | ANO2            | -1,131062212 | -1,494668682 | 0,363606469 |  |
| 234845_at    | DKFZp761P0212   | -1,131062212 | -1,494668682 | 0,363606469 |  |
| 244281_at    | REXO1           | -1,131062212 | -1,494668682 | 0,363606469 |  |
| 244499_at    | THAP2           | -1,131062212 | -1,494668682 | 0,363606469 |  |
| 202702_at    | TRIM26          | 1,119359127  | 0,755840599  | 0,363518528 |  |
| 209000_s_at  | 39692           | 1,493160564  | 1,129843209  | 0,363317355 |  |
| 231705_at    | HRSP12          | 0,917308734  | 0,553993624  | 0,36331511  |  |
| 201747_s_at  | SAFB            | 2,190100188  | 1,826973888  | 0,363126299 |  |
| 211763_s_at  | UBE2B           | 3,329826127  | 2,966746113  | 0,363080014 |  |
| 1554927_at   | LINC00598       | -1,424023738 | -1,787089803 | 0,363066065 |  |
| 1570650_at   | CCBL1           | -1,424023738 | -1,787089803 | 0,363066065 |  |
| 206395_at    | DGKG            | -1,424023738 | -1,787089803 | 0,363066065 |  |
| 208711_s_at  | CCND1           | -1,424023738 | -1,787089803 | 0,363066065 |  |
| 209652_s_at  | PGF             | -1,424023738 | -1,787089803 | 0,363066065 |  |
| 211591_s_at  | PDE4A           | -1,424023738 | -1,787089803 | 0,363066065 |  |
| 211616_s_at  | HTR2A           | -1,424023738 | -1,787089803 | 0,363066065 |  |
| 214689_at    | PAPPA2          | -1,424023738 | -1,787089803 | 0,363066065 |  |
| 221051_s_at  | NMRK2           | -1,424023738 | -1,787089803 | 0,363066065 |  |
| 228471_at    | ANKRD44         | -1,424023738 | -1,787089803 | 0,363066065 |  |
| 230523_at    | QSOX1           | -1,424023738 | -1,787089803 | 0,363066065 |  |
| 231492_at    | LOC100506034    | -1,424023738 | -1,787089803 | 0,363066065 |  |
| 237349_at    | -               | -1,424023738 | -1,787089803 | 0,363066065 |  |
| 241626_at    | WTAP            | -1,424023738 | -1,787089803 | 0,363066065 |  |
| 243308_at    | -               | -1,424023738 | -1,787089803 | 0,363066065 |  |
| 243702_at    | -               | -1,424023738 | -1,787089803 | 0,363066065 |  |
| 204165_at    | WASF1           | 4,779045678  | 4,41598058   | 0,363065098 |  |
| 1555399_a_at | DUSP16          | -0,055687482 | -0,41858459  | 0,362897108 |  |
| 1555550_at   | ZACN            | -0,055687482 | -0,41858459  | 0,362897108 |  |
| 1569640_s_at | EEPD1           | -0,055687482 | -0,41858459  | 0,362897108 |  |
| 229697_at    | HIRIP3          | -0,055687482 | -0,41858459  | 0,362897108 |  |
| 228123_s_at  | ABHD12          | 2,485917452  | 2,123108223  | 0,362809228 |  |
| 212799_at    | STX6            | 2,791679321  | 2,428994491  | 0,362684831 |  |
| 211050_x_at  | LOC100134822 /  | 0,715481152  | 0,352836757  | 0,362644394 |  |
| 204849_at    | DPH3P1 /// TCFL | 2,626954721  | 2,264418116  | 0,362536605 |  |
| 224734_at    | HMGB1           | 4,224629877  | 3,862161446  | 0,362468432 |  |
| 202166_s_at  | PPP1R2          | 2,814842651  | 2,452428893  | 0,362413758 |  |
| 201933_at    | CHMP1A          | 2,830080806  | 2,467842989  | 0,362237816 |  |
| 1559023_a_at | KIAA0494        | 0,44160593   | 0,079428135  | 0,362177795 |  |
| 204005_s_at  | PAWR            | 1,442503549  | 1,080561626  | 0,361941923 |  |
| 227514_at    | ITPRIPL2        | 0,779676066  | 0,417770464  | 0,361905602 |  |
| 230281_at    | C16orf46        | 0,779676066  | 0,417770464  | 0,361905602 |  |
| 225827_at    | EIF2C2          | 1,05337236   | 0,691645685  | 0,361726674 |  |
| 243405_at    | -               | 1,780386218  | 1,418668082  | 0,361718136 |  |
| 208844_at    | VDAC3           | 1,923647937  | 1,562009954  | 0,361637983 |  |
| 212440_at    | SNRNP27         | 3,815015946  | 3,453616097  | 0,361399849 |  |
| 207733_x_at  | PSG9            | 0,103263601  | -0,258114234 | 0,361377835 |  |
| 208931_s_at  | ILF3            | 5,970881696  | 5,60955773   | 0,361323966 |  |
| 209677_at    | PRKCI           | 0,518867317  | 0,157549243  | 0,361318074 |  |
| 212765_at    | CAMSAP2         | 1,751865623  | 1,390636111  | 0,361229511 |  |
| 224814_at    | DPP7            | 2,406821352  | 2,045615873  | 0,36120548  |  |
| 1553983_at   | DTYMK           | 1,897847661  | 1,536652708  | 0,361194953 |  |
| 217822_at    | WBP11           | 3,988699475  | 3,62753841   | 0,361161065 |  |
| 207513_s_at  | ZNF189          | 3,209137871  | 2,848075314  | 0,361062557 |  |
| 1557137_at   | TMEM17          | -0,285837228 | -0,646746079 | 0,36090885  |  |
| 206132_at    | MCC             | -0,285837228 | -0,646746079 | 0,36090885  |  |
| 210247_at    | SYN2            | -0,285837228 | -0,646746079 | 0,36090885  |  |

|              |                |              |              |             |  |
|--------------|----------------|--------------|--------------|-------------|--|
| 213075_at    | OLFML2A        | -0,285837228 | -0,646746079 | 0,36090885  |  |
| 224045_x_at  | LINC00470      | -0,285837228 | -0,646746079 | 0,36090885  |  |
| 237270_at    | LOC100505710   | -0,285837228 | -0,646746079 | 0,36090885  |  |
| 238136_at    | SHISA7         | -0,285837228 | -0,646746079 | 0,36090885  |  |
| 204276_at    | TK2            | 1,129248302  | 0,768343791  | 0,360904511 |  |
| 201409_s_at  | PPP1CB         | 3,182077878  | 2,821324225  | 0,360753653 |  |
| 227818_at    | CEP85          | 2,981056773  | 2,620464265  | 0,360592508 |  |
| 205770_at    | GSR            | 3,399920684  | 3,039473081  | 0,360447603 |  |
| 231203_at    | LOC100505478   | 0,20027154   | -0,160136748 | 0,360408288 |  |
| 240121_x_at  | -              | 1,177702228  | 0,817300337  | 0,360401891 |  |
| 204161_s_at  | ENPP4          | 2,438982012  | 2,078620836  | 0,360361176 |  |
| 225964_at    | ZXDC           | 1,504602299  | 1,144305291  | 0,360297008 |  |
| 228366_at    | -              | 1,360921491  | 1,000684521  | 0,36023697  |  |
| 205915_x_at  | GRIN1          | -0,59053611  | -0,950686014 | 0,360149904 |  |
| 205985_x_at  | CLCNKB         | -0,59053611  | -0,950686014 | 0,360149904 |  |
| 206424_at    | CYP26A1        | -0,59053611  | -0,950686014 | 0,360149904 |  |
| 217544_at    | -              | -0,59053611  | -0,950686014 | 0,360149904 |  |
| 239668_at    | -              | -0,59053611  | -0,950686014 | 0,360149904 |  |
| 244108_at    | SYNPO2         | -0,59053611  | -0,950686014 | 0,360149904 |  |
| 218942_at    | PIP4K2C        | 3,641042878  | 3,281121096  | 0,359921783 |  |
| 224982_at    | AKT1S1         | 2,156646206  | 1,796776588  | 0,359869618 |  |
| 1557375_at   | -              | -0,79540287  | -1,154897679 | 0,359494809 |  |
| 203510_at    | MET            | -0,79540287  | -1,154897679 | 0,359494809 |  |
| 205685_at    | CD86           | -0,79540287  | -1,154897679 | 0,359494809 |  |
| 205874_at    | ITPKA          | -0,79540287  | -1,154897679 | 0,359494809 |  |
| 222245_s_at  | FER1L4         | -0,79540287  | -1,154897679 | 0,359494809 |  |
| 229621_x_at  | EBF3           | -0,79540287  | -1,154897679 | 0,359494809 |  |
| 231561_s_at  | APOC2          | -0,79540287  | -1,154897679 | 0,359494809 |  |
| 236950_s_at  | LOC157381      | -0,79540287  | -1,154897679 | 0,359494809 |  |
| 237415_at    | -              | -0,79540287  | -1,154897679 | 0,359494809 |  |
| 239916_at    | WDR16          | -0,79540287  | -1,154897679 | 0,359494809 |  |
| 222478_at    | VPS36          | 3,158127685  | 2,798646381  | 0,359481305 |  |
| 210098_s_at  | -              | 2,680059304  | 2,320681318  | 0,359377987 |  |
| 218748_s_at  | EXOC5          | 2,281618189  | 1,922365006  | 0,359253183 |  |
| 1560404_a_at | ATPBD4         | -2,779459409 | -3,138626879 | 0,35916747  |  |
| 202196_s_at  | DKK3           | -2,779459409 | -3,138626879 | 0,35916747  |  |
| 217012_at    | -              | -2,779459409 | -3,138626879 | 0,35916747  |  |
| 228695_at    | C8orf46        | -2,779459409 | -3,138626879 | 0,35916747  |  |
| 236892_s_at  | HOXB-AS3       | -2,779459409 | -3,138626879 | 0,35916747  |  |
| 238411_x_at  | NREP           | -2,779459409 | -3,138626879 | 0,35916747  |  |
| 240103_at    | -              | -2,779459409 | -3,138626879 | 0,35916747  |  |
| 241088_at    | -              | -2,779459409 | -3,138626879 | 0,35916747  |  |
| 220583_at    | -              | 0,334552598  | -0,024572586 | 0,359125185 |  |
| 222312_s_at  | -              | 0,334552598  | -0,024572586 | 0,359125185 |  |
| 218978_s_at  | SLC25A37       | 2,171078719  | 1,811954245  | 0,359124475 |  |
| 214093_s_at  | FUBP1          | 2,303618506  | 1,944570415  | 0,359048091 |  |
| 235542_at    | TET3           | 2,303618506  | 1,944570415  | 0,359048091 |  |
| 1564277_a_at | LOC100133920 / | 1,063722698  | 0,704715219  | 0,359007479 |  |
| 217303_s_at  | ADRB3          | -0,496991414 | -0,855751026 | 0,358759612 |  |
| 223642_at    | ZIC2           | 2,077135162  | 1,718396606  | 0,358738556 |  |
| 1557438_at   | -              | -2,262747984 | -2,621331989 | 0,358584005 |  |
| 1557759_at   | ATP5SL         | -2,262747984 | -2,621331989 | 0,358584005 |  |
| 1559350_at   | -              | -2,262747984 | -2,621331989 | 0,358584005 |  |
| 1561211_at   | -              | -2,262747984 | -2,621331989 | 0,358584005 |  |
| 1562669_at   | -              | -2,262747984 | -2,621331989 | 0,358584005 |  |
| 205751_at    | SH3GL2         | -2,262747984 | -2,621331989 | 0,358584005 |  |

|             |                 |              |              |             |  |
|-------------|-----------------|--------------|--------------|-------------|--|
| 206033_s_at | DSC3            | -2,262747984 | -2,621331989 | 0,358584005 |  |
| 215058_at   | DENND5B         | -2,262747984 | -2,621331989 | 0,358584005 |  |
| 216764_at   | -               | -2,262747984 | -2,621331989 | 0,358584005 |  |
| 217551_at   | OR7E14P         | -2,262747984 | -2,621331989 | 0,358584005 |  |
| 221019_s_at | COLEC12         | -2,262747984 | -2,621331989 | 0,358584005 |  |
| 224075_s_at | VSX1            | -2,262747984 | -2,621331989 | 0,358584005 |  |
| 224771_at   | NAV1            | -2,262747984 | -2,621331989 | 0,358584005 |  |
| 237375_at   | LOC100506816    | -2,262747984 | -2,621331989 | 0,358584005 |  |
| 238091_at   | LOC100506388    | -2,262747984 | -2,621331989 | 0,358584005 |  |
| 240460_at   | -               | -2,262747984 | -2,621331989 | 0,358584005 |  |
| 240938_at   | -               | -2,262747984 | -2,621331989 | 0,358584005 |  |
| 241455_at   | C6orf132        | -2,262747984 | -2,621331989 | 0,358584005 |  |
| 242262_x_at | -               | -2,262747984 | -2,621331989 | 0,358584005 |  |
| 242295_at   | FLJ32955        | -2,262747984 | -2,621331989 | 0,358584005 |  |
| 242563_at   | -               | -2,262747984 | -2,621331989 | 0,358584005 |  |
| 210758_at   | PSIP1           | 0,417596971  | 0,059218869  | 0,358378102 |  |
| 222096_x_at | LOC100507284    | 0,417596971  | 0,059218869  | 0,358378102 |  |
| 205282_at   | LRP8            | 1,512180019  | 1,153866761  | 0,358313257 |  |
| 212277_at   | MTMR4           | 1,716223609  | 1,3579181    | 0,358305509 |  |
| 213606_s_at | ARHGDI4         | 1,163336153  | 0,805216064  | 0,358120089 |  |
| 229870_at   | LOC644656       | 0,853119696  | 0,495031851  | 0,358087845 |  |
| 212417_at   | SCAMP1          | 1,549482847  | 1,191491281  | 0,357991566 |  |
| 200872_at   | S100A10         | 4,105389286  | 3,747642277  | 0,357747009 |  |
| 203678_at   | FAN1            | 1,883312263  | 1,525647381  | 0,357664882 |  |
| 1556715_at  | PRPSAP1         | 0,255492549  | -0,102100538 | 0,357593087 |  |
| 1568838_at  | WASIR2          | 0,255492549  | -0,102100538 | 0,357593087 |  |
| 1559504_at  | MIR137HG /// MI | -3,114791413 | -3,472251727 | 0,357460314 |  |
| 215152_at   | MYB             | 1,094335495  | 0,73688026   | 0,357455234 |  |
| 206667_s_at | SCAMP1          | 0,533835206  | 0,176436073  | 0,357399133 |  |
| 213389_at   | ZNF592          | 0,533835206  | 0,176436073  | 0,357399133 |  |
| 216293_at   | CLTA            | 0,533835206  | 0,176436073  | 0,357399133 |  |
| 214574_x_at | LST1            | 1,735773781  | 1,378453643  | 0,357320138 |  |
| 1561127_at  | ADARB2-AS1      | -0,033456564 | -0,39061235  | 0,357155786 |  |
| 215821_x_at | PSG3            | -0,033456564 | -0,39061235  | 0,357155786 |  |
| 219663_s_at | TMEM121         | -0,033456564 | -0,39061235  | 0,357155786 |  |
| 220915_s_at | -               | -0,033456564 | -0,39061235  | 0,357155786 |  |
| 233439_at   | LETM1           | -0,033456564 | -0,39061235  | 0,357155786 |  |
| 244028_at   | USP15           | -0,033456564 | -0,39061235  | 0,357155786 |  |
| 1557427_at  | -               | -2,597496523 | -2,954576755 | 0,357080232 |  |
| 1560506_at  | -               | -2,597496523 | -2,954576755 | 0,357080232 |  |
| 1561617_at  | DNAH6           | -2,597496523 | -2,954576755 | 0,357080232 |  |
| 1562094_at  | -               | -2,597496523 | -2,954576755 | 0,357080232 |  |
| 1562420_at  | -               | -2,597496523 | -2,954576755 | 0,357080232 |  |
| 206293_at   | SULT2A1         | -2,597496523 | -2,954576755 | 0,357080232 |  |
| 211131_s_at | EDA             | -2,597496523 | -2,954576755 | 0,357080232 |  |
| 217575_s_at | -               | -2,597496523 | -2,954576755 | 0,357080232 |  |
| 233109_at   | COL12A1         | -2,597496523 | -2,954576755 | 0,357080232 |  |
| 237354_at   | PDXDC1          | -2,597496523 | -2,954576755 | 0,357080232 |  |
| 227963_at   | -               | 1,143956113  | 0,786897721  | 0,357058392 |  |
| 203527_s_at | APC             | 0,606430281  | 0,249604176  | 0,356826106 |  |
| 221743_at   | CELF1           | 5,023325284  | 4,666563551  | 0,356761733 |  |
| 201542_at   | SAR1A           | 4,776688188  | 4,419948427  | 0,356739761 |  |
| 231320_at   | EBP             | 0,384950573  | 0,028364014  | 0,356586559 |  |
| 210280_at   | MPZ             | 0,072842263  | -0,283667828 | 0,35651009  |  |
| 211350_s_at | KIF25-AS1       | 0,072842263  | -0,283667828 | 0,35651009  |  |
| 228354_at   | MORN4           | 0,072842263  | -0,283667828 | 0,35651009  |  |



|              |                 |              |              |             |  |
|--------------|-----------------|--------------|--------------|-------------|--|
| 238446_at    | NAIP            | 0,072842263  | -0,283667828 | 0,35651009  |  |
| 242408_at    | STYX            | 0,072842263  | -0,283667828 | 0,35651009  |  |
| 209786_at    | HMGH4           | 4,667677441  | 4,311461649  | 0,356215793 |  |
| 223352_s_at  | C17orf80        | 1,556829052  | 1,200746069  | 0,356082982 |  |
| 228867_at    | TATDN3          | 0,46522187   | 0,109221392  | 0,356000478 |  |
| 231700_at    | GUCA1A          | 0,46522187   | 0,109221392  | 0,356000478 |  |
| 218701_at    | LACTB2          | 2,626954721  | 2,271023131  | 0,35593159  |  |
| 242751_at    | -               | 1,305306849  | 0,949447784  | 0,355859066 |  |
| 200902_at    | 42248           | 5,365737993  | 5,010057188  | 0,355680806 |  |
| 1552794_a_at | ZNF547          | -1,308181863 | -1,663414495 | 0,355232632 |  |
| 1559996_s_at | SAMD14          | -1,308181863 | -1,663414495 | 0,355232632 |  |
| 1563118_at   | -               | -1,308181863 | -1,663414495 | 0,355232632 |  |
| 1563793_at   | LOC100130278    | -1,308181863 | -1,663414495 | 0,355232632 |  |
| 1569337_at   | SLC5A9          | -1,308181863 | -1,663414495 | 0,355232632 |  |
| 1569885_at   | LOC100302640    | -1,308181863 | -1,663414495 | 0,355232632 |  |
| 206181_at    | SLAMF1          | -1,308181863 | -1,663414495 | 0,355232632 |  |
| 206690_at    | ASIC2           | -1,308181863 | -1,663414495 | 0,355232632 |  |
| 207024_at    | CHRNA           | -1,308181863 | -1,663414495 | 0,355232632 |  |
| 215049_x_at  | CD163           | -1,308181863 | -1,663414495 | 0,355232632 |  |
| 215959_at    | -               | -1,308181863 | -1,663414495 | 0,355232632 |  |
| 217587_at    | -               | -1,308181863 | -1,663414495 | 0,355232632 |  |
| 226272_at    | RCAN3           | -1,308181863 | -1,663414495 | 0,355232632 |  |
| 233554_at    | -               | -1,308181863 | -1,663414495 | 0,355232632 |  |
| 238712_at    | -               | -1,308181863 | -1,663414495 | 0,355232632 |  |
| 241767_at    | -               | -1,308181863 | -1,663414495 | 0,355232632 |  |
| 243043_at    | -               | -1,308181863 | -1,663414495 | 0,355232632 |  |
| 201016_at    | EIF1AX          | 5,776339397  | 5,42111841   | 0,355220987 |  |
| 205953_at    | LRIG2           | 1,835789711  | 1,480766833  | 0,355022878 |  |
| 228645_at    | SNHG9 /// SNOR  | 1,835789711  | 1,480766833  | 0,355022878 |  |
| 222419_x_at  | UBE2H           | 0,30867765   | -0,046302147 | 0,354979797 |  |
| 202160_at    | CREBBP          | 3,416167722  | 3,061230246  | 0,354937476 |  |
| 243856_at    | LANCL3          | 0,648296226  | 0,293518836  | 0,35477739  |  |
| 1557321_a_at | CAPN14          | -2,823166348 | -3,177802286 | 0,354635938 |  |
| 1562464_at   | -               | -2,823166348 | -3,177802286 | 0,354635938 |  |
| 1566169_at   | -               | -2,823166348 | -3,177802286 | 0,354635938 |  |
| 207932_at    | IFNA8           | -2,823166348 | -3,177802286 | 0,354635938 |  |
| 222359_x_at  | KDSR            | -2,823166348 | -3,177802286 | 0,354635938 |  |
| 234453_s_at  | C14orf166B      | -2,823166348 | -3,177802286 | 0,354635938 |  |
| 241083_at    | -               | -2,823166348 | -3,177802286 | 0,354635938 |  |
| 241578_x_at  | -               | -2,823166348 | -3,177802286 | 0,354635938 |  |
| 1569714_at   | ZFYVE20         | -0,136301282 | -0,490927335 | 0,354626053 |  |
| 204678_s_at  | KCNK1           | -0,136301282 | -0,490927335 | 0,354626053 |  |
| 211873_s_at  | PCDHGA9         | -0,136301282 | -0,490927335 | 0,354626053 |  |
| 221558_s_at  | LEF1            | -0,136301282 | -0,490927335 | 0,354626053 |  |
| 240252_at    | -               | -0,136301282 | -0,490927335 | 0,354626053 |  |
| 210320_s_at  | DDX52           | 1,649074067  | 1,294497133  | 0,354576934 |  |
| 231124_x_at  | LY9             | -0,259832361 | -0,614371577 | 0,354539215 |  |
| 239933_x_at  | C14orf45        | -0,259832361 | -0,614371577 | 0,354539215 |  |
| 212239_at    | PIK3R1          | 2,640847372  | 2,286318242  | 0,35452913  |  |
| 204513_s_at  | ELMO1           | 3,043834719  | 2,689475799  | 0,35435892  |  |
| 1556762_a_at | -               | -0,655928373 | -1,010192375 | 0,354264002 |  |
| 201325_s_at  | EMP1            | -0,655928373 | -1,010192375 | 0,354264002 |  |
| 205611_at    | TNFSF12 /// TNF | -0,655928373 | -1,010192375 | 0,354264002 |  |
| 205808_at    | ASPH            | -0,655928373 | -1,010192375 | 0,354264002 |  |
| 208452_x_at  | MYO9B           | -0,655928373 | -1,010192375 | 0,354264002 |  |
| 211705_s_at  | SORBS1          | -0,655928373 | -1,010192375 | 0,354264002 |  |

|             |                 |              |              |             |  |
|-------------|-----------------|--------------|--------------|-------------|--|
| 221373_x_at | PSPN            | -0,655928373 | -1,010192375 | 0,354264002 |  |
| 222054_at   | PPIEL           | -0,655928373 | -1,010192375 | 0,354264002 |  |
| 231262_at   | -               | -0,655928373 | -1,010192375 | 0,354264002 |  |
| 232849_at   | LOC100128988    | -0,655928373 | -1,010192375 | 0,354264002 |  |
| 234162_at   | -               | -0,655928373 | -1,010192375 | 0,354264002 |  |
| 239689_at   | -               | -0,655928373 | -1,010192375 | 0,354264002 |  |
| 202241_at   | TRIB1           | 4,082030648  | 3,727773127  | 0,354257521 |  |
| 232513_x_at | FAM209B         | 0,747935635  | 0,393761504  | 0,354174131 |  |
| 222638_s_at | TMEM242         | 3,327680494  | 2,973511251  | 0,354169244 |  |
| 1562788_at  | LOC254099       | 0,03125738   | -0,322870281 | 0,354127661 |  |
| 210823_s_at | PTPRS           | 0,03125738   | -0,322870281 | 0,354127661 |  |
| 235263_at   | STAG3L1 /// STA | 0,03125738   | -0,322870281 | 0,354127661 |  |
| 1552813_at  | KLF14           | -0,325749314 | -0,679763839 | 0,354014525 |  |
| 207788_s_at | SORBS3          | -0,325749314 | -0,679763839 | 0,354014525 |  |
| 220047_at   | SIRT4           | -0,325749314 | -0,679763839 | 0,354014525 |  |
| 228626_at   | URM1            | -0,325749314 | -0,679763839 | 0,354014525 |  |
| 208511_at   | PTTG3P          | 2,520143371  | 2,166264721  | 0,353878649 |  |
| 209283_at   | CRYAB           | 0,810733188  | 0,456918297  | 0,35381489  |  |
| 208070_s_at | REV3L           | 2,912562019  | 2,558821855  | 0,353740165 |  |
| 221248_s_at | WHSC1L1         | 0,133056859  | -0,220592223 | 0,353649082 |  |
| 235365_at   | DFNB59          | 0,133056859  | -0,220592223 | 0,353649082 |  |
| 235491_at   | ZBTB10          | 0,133056859  | -0,220592223 | 0,353649082 |  |
| 236343_at   | -               | 0,133056859  | -0,220592223 | 0,353649082 |  |
| 202541_at   | AIMP1           | 2,827046023  | 2,473581079  | 0,353464944 |  |
| 210076_x_at | SERBP1          | 4,357025868  | 4,003717379  | 0,353308489 |  |
| 1565714_at  | -               | -0,759588698 | -1,112851844 | 0,353263146 |  |
| 1570338_at  | -               | -0,759588698 | -1,112851844 | 0,353263146 |  |
| 204888_s_at | NEURL           | -0,759588698 | -1,112851844 | 0,353263146 |  |
| 211879_x_at | PCDHGA3         | -0,759588698 | -1,112851844 | 0,353263146 |  |
| 220158_at   | LGALS14         | -0,759588698 | -1,112851844 | 0,353263146 |  |
| 229931_at   | ZNF775          | -0,759588698 | -1,112851844 | 0,353263146 |  |
| 231686_at   | GATM            | -0,759588698 | -1,112851844 | 0,353263146 |  |
| 233144_s_at | RASAL1          | -0,759588698 | -1,112851844 | 0,353263146 |  |
| 242903_at   | IFNGR1          | -0,759588698 | -1,112851844 | 0,353263146 |  |
| 1558431_at  | NHLRC4          | 1,567778694  | 1,214517879  | 0,353260815 |  |
| 221737_at   | GNA12           | 1,567778694  | 1,214517879  | 0,353260815 |  |
| 1554777_at  | ZFP42           | -2,64318869  | -2,996335703 | 0,353147013 |  |
| 1560104_at  | -               | -2,64318869  | -2,996335703 | 0,353147013 |  |
| 1568868_at  | CYP27C1         | -2,64318869  | -2,996335703 | 0,353147013 |  |
| 206349_at   | LGI1            | -2,64318869  | -2,996335703 | 0,353147013 |  |
| 213496_at   | LPPR4           | -2,64318869  | -2,996335703 | 0,353147013 |  |
| 224043_s_at | UPB1            | -2,64318869  | -2,996335703 | 0,353147013 |  |
| 232099_at   | PCDHB16         | -2,64318869  | -2,996335703 | 0,353147013 |  |
| 239942_at   | -               | -2,64318869  | -2,996335703 | 0,353147013 |  |
| 240246_at   | LOC642236       | -2,64318869  | -2,996335703 | 0,353147013 |  |
| 243936_x_at | -               | -2,64318869  | -2,996335703 | 0,353147013 |  |
| 208770_s_at | EIF4EBP2        | 3,042527069  | 2,689475799  | 0,35305127  |  |
| 237400_at   | -               | 0,95671774   | 0,603679647  | 0,353038093 |  |
| 229436_x_at | BRCC3           | 1,783520648  | 1,43051703   | 0,353003618 |  |
| 1570197_at  | -               | 0,273439642  | -0,079522948 | 0,35296259  |  |
| 210077_s_at | SRSF5           | 0,273439642  | -0,079522948 | 0,35296259  |  |
| 211077_s_at | TLK1            | 0,273439642  | -0,079522948 | 0,35296259  |  |
| 220022_at   | ZNF334          | 0,273439642  | -0,079522948 | 0,35296259  |  |
| 230364_at   | CHPT1           | 0,273439642  | -0,079522948 | 0,35296259  |  |
| 238209_at   | -               | 0,273439642  | -0,079522948 | 0,35296259  |  |
| 226579_at   | -               | 3,074867907  | 2,721978587  | 0,35288932  |  |

|              |                 |              |              |             |  |
|--------------|-----------------|--------------|--------------|-------------|--|
| 202506_at    | SSFA2           | 3,166555554  | 2,813804482  | 0,352751072 |  |
| 1552478_a_at | IRF6            | 0,359971644  | 0,007421914  | 0,35254973  |  |
| 1559426_at   | -               | 0,359971644  | 0,007421914  | 0,35254973  |  |
| 207442_at    | CSF3            | 0,359971644  | 0,007421914  | 0,35254973  |  |
| 215903_s_at  | MAST2           | 1,339784194  | 0,987376598  | 0,352407597 |  |
| 227604_at    | TMEM185B        | 1,089278259  | 0,73688026   | 0,352397999 |  |
| 222329_x_at  | -               | 1,139070151  | 0,786897721  | 0,352172429 |  |
| 1566302_at   | PPP1R11         | -0,467091869 | -0,819238336 | 0,352146467 |  |
| 213873_at    | ST3GAL6         | -0,467091869 | -0,819238336 | 0,352146467 |  |
| 227655_at    | LOC100505806    | -0,467091869 | -0,819238336 | 0,352146467 |  |
| 227667_at    | CUEDC1          | -0,467091869 | -0,819238336 | 0,352146467 |  |
| 239315_at    | FAM115C         | -0,467091869 | -0,819238336 | 0,352146467 |  |
| 241754_at    | SCAI            | -0,467091869 | -0,819238336 | 0,352146467 |  |
| 1554557_at   | ATP11B          | 1,62481334   | 1,272721751  | 0,352091589 |  |
| 214830_at    | SLC38A6         | 3,919150955  | 3,56709884   | 0,352052115 |  |
| 210387_at    | HIST1H2BC /// H | 2,890927111  | 2,538891651  | 0,35203546  |  |
| 206614_at    | GDF5            | 0,480753764  | 0,128747141  | 0,352006623 |  |
| 227943_at    | -               | 0,480753764  | 0,128747141  | 0,352006623 |  |
| 229946_at    | FAM168B         | 0,480753764  | 0,128747141  | 0,352006623 |  |
| 236049_at    | WDR90           | 0,480753764  | 0,128747141  | 0,352006623 |  |
| 218255_s_at  | FBRS            | 1,187200746  | 0,835239052  | 0,351961694 |  |
| 222763_s_at  | SFT2D3 /// WDR  | 3,684447666  | 3,332545245  | 0,351902421 |  |
| 212051_at    | WIPF2           | 2,790121796  | 2,438805127  | 0,351316669 |  |
| 211665_s_at  | SOS2            | 0,661985843  | 0,310717132  | 0,351268711 |  |
| 64438_at     | C17orf101       | 1,512180019  | 1,160996507  | 0,351183512 |  |
| 1556263_s_at | PWRN1           | -2,384869671 | -2,735862426 | 0,350992754 |  |
| 1556410_a_at | KRTAP19-1       | -2,384869671 | -2,735862426 | 0,350992754 |  |
| 1563182_at   | ACVR1C          | -2,384869671 | -2,735862426 | 0,350992754 |  |
| 1568882_at   | LRTOMT          | -2,384869671 | -2,735862426 | 0,350992754 |  |
| 211923_s_at  | ZNF471          | -2,384869671 | -2,735862426 | 0,350992754 |  |
| 215352_at    | GIMAP1-GIMAP5   | -2,384869671 | -2,735862426 | 0,350992754 |  |
| 225645_at    | EHF             | -2,384869671 | -2,735862426 | 0,350992754 |  |
| 228855_at    | NUDT7           | -2,384869671 | -2,735862426 | 0,350992754 |  |
| 231503_at    | LOC100507193    | -2,384869671 | -2,735862426 | 0,350992754 |  |
| 231551_at    | LOC729059       | -2,384869671 | -2,735862426 | 0,350992754 |  |
| 234523_at    | -               | -2,384869671 | -2,735862426 | 0,350992754 |  |
| 235740_at    | MCTP1           | -2,384869671 | -2,735862426 | 0,350992754 |  |
| 242653_at    | DCC             | -2,384869671 | -2,735862426 | 0,350992754 |  |
| 243172_at    | -               | -2,384869671 | -2,735862426 | 0,350992754 |  |
| 243254_at    | HIVEP2          | -2,384869671 | -2,735862426 | 0,350992754 |  |
| 1552293_at   | TMEM196         | -1,026571149 | -1,377419394 | 0,350848245 |  |
| 1553323_a_at | CATSPER2        | -1,026571149 | -1,377419394 | 0,350848245 |  |
| 1558930_at   | LINC00460       | -1,026571149 | -1,377419394 | 0,350848245 |  |
| 1569052_at   | -               | -1,026571149 | -1,377419394 | 0,350848245 |  |
| 203888_at    | THBD            | -1,026571149 | -1,377419394 | 0,350848245 |  |
| 216277_at    | BUB1            | -1,026571149 | -1,377419394 | 0,350848245 |  |
| 223834_at    | CD274           | -1,026571149 | -1,377419394 | 0,350848245 |  |
| 229685_at    | LOC100134937    | -1,026571149 | -1,377419394 | 0,350848245 |  |
| 236294_at    | HUWE1           | -1,026571149 | -1,377419394 | 0,350848245 |  |
| 237308_at    | -               | -1,026571149 | -1,377419394 | 0,350848245 |  |
| 240730_at    | -               | -1,026571149 | -1,377419394 | 0,350848245 |  |
| 226339_at    | TRUB1           | 3,822654227  | 3,471887144  | 0,350767083 |  |
| 216559_x_at  | -               | 4,982993627  | 4,632345568  | 0,350648058 |  |
| 223622_s_at  | HYI             | 0,882651021  | 0,532164371  | 0,35048665  |  |
| 243046_at    | -               | 0,882651021  | 0,532164371  | 0,35048665  |  |
| 225740_x_at  | MDM4            | 3,547344317  | 3,196911138  | 0,350433179 |  |

|              |                 |              |              |             |  |
|--------------|-----------------|--------------|--------------|-------------|--|
| 210645_s_at  | TTC3 /// TTC3P1 | 5,842829726  | 5,492446869  | 0,350382857 |  |
| 226389_s_at  | RAPGEF1         | 1,326951551  | 0,976641161  | 0,35031039  |  |
| 1555180_at   | LOC100132686    | -1,812418401 | -2,162639771 | 0,35022137  |  |
| 1564238_a_at | WDR49           | -1,812418401 | -2,162639771 | 0,35022137  |  |
| 204261_s_at  | PSEN2           | -1,812418401 | -2,162639771 | 0,35022137  |  |
| 214024_s_at  | DGCR6L          | -1,812418401 | -2,162639771 | 0,35022137  |  |
| 221198_at    | SCT             | -1,812418401 | -2,162639771 | 0,35022137  |  |
| 224216_at    | -               | -1,812418401 | -2,162639771 | 0,35022137  |  |
| 228417_at    | ISYNA1          | -1,812418401 | -2,162639771 | 0,35022137  |  |
| 232070_at    | LOC100506639    | -1,812418401 | -2,162639771 | 0,35022137  |  |
| 232123_at    | LOC283174       | -1,812418401 | -2,162639771 | 0,35022137  |  |
| 233978_at    | PTPRE           | -1,812418401 | -2,162639771 | 0,35022137  |  |
| 234067_at    | -               | -1,812418401 | -2,162639771 | 0,35022137  |  |
| 236148_at    | LOC100507568    | -1,812418401 | -2,162639771 | 0,35022137  |  |
| 236169_at    | -               | -1,812418401 | -2,162639771 | 0,35022137  |  |
| 237674_at    | -               | -1,812418401 | -2,162639771 | 0,35022137  |  |
| 239544_at    | -               | -1,812418401 | -2,162639771 | 0,35022137  |  |
| 239967_at    | -               | -1,812418401 | -2,162639771 | 0,35022137  |  |
| 240141_at    | -               | -1,812418401 | -2,162639771 | 0,35022137  |  |
| 243593_s_at  | -               | -1,812418401 | -2,162639771 | 0,35022137  |  |
| 224185_at    | WRAP53          | 1,666156729  | 1,315948728  | 0,350208    |  |
| 225760_at    | MYSM1           | 3,217273782  | 2,867091644  | 0,350182137 |  |
| 219203_at    | EMC9            | 2,348755185  | 1,998633167  | 0,350122018 |  |
| 206526_at    | RIBC2           | 1,021868205  | 0,67181667   | 0,350051535 |  |
| 205356_at    | USP13           | 1,073999308  | 0,724100169  | 0,349899139 |  |
| 209947_at    | UBAP2L          | 2,035673598  | 1,685812099  | 0,349861499 |  |
| 1558152_at   | LOC100131262    | 2,701760055  | 2,352169913  | 0,349590142 |  |
| 228142_at    | UQCR10          | 2,185368281  | 1,835911187  | 0,349457094 |  |
| 1559094_at   | FBXO9           | 0,702292136  | 0,352836757  | 0,349455379 |  |
| 214309_s_at  | C21orf2         | 0,330272223  | -0,019180479 | 0,349452702 |  |
| 223178_s_at  | NT5DC1          | 2,758612869  | 2,409170778  | 0,349442091 |  |
| 1555610_at   | AGK             | -1,688127507 | -2,037551727 | 0,34942422  |  |
| 1559580_at   | LRRC39          | -1,688127507 | -2,037551727 | 0,34942422  |  |
| 1563894_at   | LOC441178       | -1,688127507 | -2,037551727 | 0,34942422  |  |
| 1566689_at   | -               | -1,688127507 | -2,037551727 | 0,34942422  |  |
| 208470_s_at  | HP /// HPR      | -1,688127507 | -2,037551727 | 0,34942422  |  |
| 214421_x_at  | CYP2C9          | -1,688127507 | -2,037551727 | 0,34942422  |  |
| 216648_s_at  | RREB1           | -1,688127507 | -2,037551727 | 0,34942422  |  |
| 219730_at    | MED18           | -1,688127507 | -2,037551727 | 0,34942422  |  |
| 222796_at    | ATP5J2-PTCD1    | -1,688127507 | -2,037551727 | 0,34942422  |  |
| 230849_at    | KCNA1           | -1,688127507 | -2,037551727 | 0,34942422  |  |
| 234171_at    | -               | -1,688127507 | -2,037551727 | 0,34942422  |  |
| 235834_at    | CALD1           | -1,688127507 | -2,037551727 | 0,34942422  |  |
| 238240_at    | -               | -1,688127507 | -2,037551727 | 0,34942422  |  |
| 238302_at    | -               | -1,688127507 | -2,037551727 | 0,34942422  |  |
| 239394_at    | SLC6A2          | -1,688127507 | -2,037551727 | 0,34942422  |  |
| 243220_at    | -               | -1,688127507 | -2,037551727 | 0,34942422  |  |
| 244321_at    | PGAP1           | -1,688127507 | -2,037551727 | 0,34942422  |  |
| 211493_x_at  | DTNA            | 0,767063567  | 0,417770464  | 0,349293103 |  |
| 225078_at    | EMP2            | 0,767063567  | 0,417770464  | 0,349293103 |  |
| 205789_at    | CD1D            | 0,82905153   | 0,479907041  | 0,349144489 |  |
| 209859_at    | TRIM9           | 0,82905153   | 0,479907041  | 0,349144489 |  |
| 229283_at    | LOC728613       | 0,82905153   | 0,479907041  | 0,349144489 |  |
| 219109_at    | SPAG16          | 1,799091453  | 1,450051551  | 0,349039903 |  |
| 1559929_at   | -               | -1,937711681 | -2,286583451 | 0,348871769 |  |
| 1560141_at   | LOC100133039    | -1,937711681 | -2,286583451 | 0,348871769 |  |

|              |                  |              |              |             |  |
|--------------|------------------|--------------|--------------|-------------|--|
| 1569701_at   | PER3             | -1,937711681 | -2,286583451 | 0,348871769 |  |
| 206805_at    | SEMA3A           | -1,937711681 | -2,286583451 | 0,348871769 |  |
| 208554_at    | POU4F3           | -1,937711681 | -2,286583451 | 0,348871769 |  |
| 215432_at    | ACSM1            | -1,937711681 | -2,286583451 | 0,348871769 |  |
| 224285_at    | GPR174           | -1,937711681 | -2,286583451 | 0,348871769 |  |
| 228150_at    | SEC16B           | -1,937711681 | -2,286583451 | 0,348871769 |  |
| 230510_at    | HSPB9            | -1,937711681 | -2,286583451 | 0,348871769 |  |
| 231980_at    | DOK6             | -1,937711681 | -2,286583451 | 0,348871769 |  |
| 234558_at    | -                | -1,937711681 | -2,286583451 | 0,348871769 |  |
| 240778_at    | GIN54            | -1,937711681 | -2,286583451 | 0,348871769 |  |
| 242708_at    | -                | -1,937711681 | -2,286583451 | 0,348871769 |  |
| 243820_at    | LOC401463        | -1,937711681 | -2,286583451 | 0,348871769 |  |
| 236781_at    | -                | -0,00073712  | -0,34958478  | 0,34884766  |  |
| 238307_at    | -                | -0,00073712  | -0,34958478  | 0,34884766  |  |
| 224090_s_at  | TNFRSF19         | -0,112808516 | -0,461594427 | 0,34878591  |  |
| 208284_x_at  | GGT1 /// GGT2 // | 0,152582607  | -0,19610998  | 0,348692587 |  |
| 216579_at    | GJB4             | 0,152582607  | -0,19610998  | 0,348692587 |  |
| 220692_at    | MIR4448          | 0,152582607  | -0,19610998  | 0,348692587 |  |
| 228249_at    | C11orf74         | 1,973904239  | 1,6252386    | 0,348665638 |  |
| 231878_at    | C16orf53         | 1,58584542   | 1,23718272   | 0,348662701 |  |
| 226680_at    | IKZF5            | 1,621313976  | 1,272721751  | 0,348592226 |  |
| 221428_s_at  | TBL1XR1          | 2,974214633  | 2,625627364  | 0,348587269 |  |
| 230034_x_at  | MRPL41           | 0,246434561  | -0,102100538 | 0,348535099 |  |
| 234858_at    | -                | 0,246434561  | -0,102100538 | 0,348535099 |  |
| 210362_x_at  | PML              | 1,224581536  | 0,876248481  | 0,348333055 |  |
| 1555809_at   | CRISPLD2         | 0,376672223  | 0,028364014  | 0,348308209 |  |
| 243664_at    | TXNL1            | 0,376672223  | 0,028364014  | 0,348308209 |  |
| 205377_s_at  | ACHE             | 0,457392764  | 0,109221392  | 0,348171372 |  |
| 238818_at    | KIAA1429         | 0,457392764  | 0,109221392  | 0,348171372 |  |
| 1553111_a_at | KBTBD6           | 0,57058931   | 0,222599095  | 0,347990216 |  |
| 211691_x_at  | -                | 0,57058931   | 0,222599095  | 0,347990216 |  |
| 227821_at    | LGI4             | 0,57058931   | 0,222599095  | 0,347990216 |  |
| 238996_x_at  | ALDOA            | 4,208686884  | 3,860702537  | 0,347984347 |  |
| 1557424_at   | LOC100505878     | -3,054236653 | -3,402185466 | 0,347948813 |  |
| 240863_at    | CYP19A1          | -3,054236653 | -3,402185466 | 0,347948813 |  |
| 205340_at    | ZBTB24           | 2,724770722  | 2,376875125  | 0,347895597 |  |
| 212981_s_at  | FAM115A /// LOC  | 4,362800281  | 4,014909928  | 0,347890353 |  |
| 226533_at    | HINT3            | 0,641402394  | 0,293518836  | 0,347883559 |  |
| 231872_at    | LRRCC1           | 0,641402394  | 0,293518836  | 0,347883559 |  |
| 1556346_at   | COTL1            | 1,515954005  | 1,16809119   | 0,347862815 |  |
| 1560888_x_at | -                | -2,43257096  | -2,780313924 | 0,347742965 |  |
| 1561010_a_at | MAOB             | -2,43257096  | -2,780313924 | 0,347742965 |  |
| 1561567_at   | -                | -2,43257096  | -2,780313924 | 0,347742965 |  |
| 209540_at    | IGF1             | -2,43257096  | -2,780313924 | 0,347742965 |  |
| 216255_s_at  | GRM8             | -2,43257096  | -2,780313924 | 0,347742965 |  |
| 222932_at    | EHF              | -2,43257096  | -2,780313924 | 0,347742965 |  |
| 224219_s_at  | TRPC4            | -2,43257096  | -2,780313924 | 0,347742965 |  |
| 234686_at    | SUGT1P1          | -2,43257096  | -2,780313924 | 0,347742965 |  |
| 241132_at    | -                | -2,43257096  | -2,780313924 | 0,347742965 |  |
| 241142_at    | -                | -2,43257096  | -2,780313924 | 0,347742965 |  |
| 202823_at    | TCEB1            | 3,497632487  | 3,149904996  | 0,347727491 |  |
| 1556319_at   | LOC283270        | -0,299034815 | -0,646746079 | 0,347711264 |  |
| 1556855_a_at | LOC283501        | -0,299034815 | -0,646746079 | 0,347711264 |  |
| 1558230_at   | SF3B2            | -0,299034815 | -0,646746079 | 0,347711264 |  |
| 210002_at    | GATA6            | -0,299034815 | -0,646746079 | 0,347711264 |  |
| 239396_at    | -                | -0,299034815 | -0,646746079 | 0,347711264 |  |

|              |                   |              |              |             |  |
|--------------|-------------------|--------------|--------------|-------------|--|
| 236852_at    | FBXO43            | 1,348276312  | 1,000684521  | 0,34759179  |  |
| 212138_at    | PDS5A             | 4,672757696  | 4,32527877   | 0,347478926 |  |
| 222946_s_at  | C1orf135          | 1,835789711  | 1,488344553  | 0,347445158 |  |
| 225607_at    | CCDC43            | 2,600539826  | 2,253342112  | 0,347197713 |  |
| 212857_x_at  | SUB1              | 6,700972236  | 6,353842334  | 0,347129902 |  |
| 201756_at    | RPA2              | 5,173943153  | 4,826818428  | 0,347124725 |  |
| 222498_at    | AZI2              | 1,296557217  | 0,949447784  | 0,347109433 |  |
| 200774_at    | FAM120A           | 5,144076207  | 4,796999275  | 0,347076933 |  |
| 221168_at    | PRDM13            | 2,776027875  | 2,428994491  | 0,347033385 |  |
| 233019_at    | CNOT7             | 1,593009234  | 1,246149888  | 0,346859346 |  |
| 224781_s_at  | RBM17             | 4,584760517  | 4,238072872  | 0,346687645 |  |
| 212989_at    | SGMS1             | 2,59519831   | 2,248887791  | 0,346310519 |  |
| 224945_at    | BTBD7             | 3,474545391  | 3,128242026  | 0,346303364 |  |
| 212523_s_at  | KIAA0146          | 0,209623097  | -0,136643983 | 0,34626708  |  |
| 226716_at    | PRR12             | 0,209623097  | -0,136643983 | 0,34626708  |  |
| 227489_at    | SMURF2            | 0,209623097  | -0,136643983 | 0,34626708  |  |
| 232756_at    | KALRN             | 0,209623097  | -0,136643983 | 0,34626708  |  |
| 233605_x_at  | HNRNPM            | 0,209623097  | -0,136643983 | 0,34626708  |  |
| 221210_s_at  | NPL               | 0,425644434  | 0,079428135  | 0,346216298 |  |
| 209689_at    | CCDC93            | 0,503742507  | 0,157549243  | 0,346193264 |  |
| 205857_at    | SLC18A2           | 0,613492853  | 0,26733076   | 0,346162094 |  |
| 227657_at    | RNF150            | 0,613492853  | 0,26733076   | 0,346162094 |  |
| 205210_at    | TGFBRAP1          | 0,779676066  | 0,433557298  | 0,346118767 |  |
| 233754_x_at  | ZNF71             | 0,841135803  | 0,495031851  | 0,346103952 |  |
| 1558801_at   | -                 | 1,037706275  | 0,691645685  | 0,34606059  |  |
| 231913_s_at  | BRCC3             | 1,210676994  | 0,864649967  | 0,346027027 |  |
| 1557675_at   | RAF1              | 1,523472489  | 1,177496821  | 0,345975668 |  |
| 229610_at    | CKAP2L            | 2,064305961  | 1,718396606  | 0,345909355 |  |
| 1555279_at   | ARMC8             | 2,456762221  | 2,110887591  | 0,34587463  |  |
| 214041_x_at  | RPL37A            | 2,666540916  | 2,320681318  | 0,345859598 |  |
| 208926_at    | NEU1              | 3,724955181  | 3,379145507  | 0,345809674 |  |
| 1555140_a_at | BCL2L2            | -0,986356909 | -1,332017329 | 0,34566042  |  |
| 1558195_at   | LINC00592         | -0,986356909 | -1,332017329 | 0,34566042  |  |
| 206393_at    | TNNI2             | -0,986356909 | -1,332017329 | 0,34566042  |  |
| 208572_at    | HIST3H3           | -0,986356909 | -1,332017329 | 0,34566042  |  |
| 211448_s_at  | RGS6              | -0,986356909 | -1,332017329 | 0,34566042  |  |
| 224197_s_at  | C1QTNF1           | -0,986356909 | -1,332017329 | 0,34566042  |  |
| 225436_at    | FAM108C1          | -0,986356909 | -1,332017329 | 0,34566042  |  |
| 231694_at    | -                 | -0,986356909 | -1,332017329 | 0,34566042  |  |
| 243677_at    | GORASP1           | -0,986356909 | -1,332017329 | 0,34566042  |  |
| 1554964_x_at | -                 | -2,063149277 | -2,408705138 | 0,34555586  |  |
| 1561418_at   | -                 | -2,063149277 | -2,408705138 | 0,34555586  |  |
| 1570488_at   | -                 | -2,063149277 | -2,408705138 | 0,34555586  |  |
| 204597_x_at  | STC1              | -2,063149277 | -2,408705138 | 0,34555586  |  |
| 205931_s_at  | CREB5 /// LOC40   | -2,063149277 | -2,408705138 | 0,34555586  |  |
| 210327_s_at  | AGXT              | -2,063149277 | -2,408705138 | 0,34555586  |  |
| 210741_at    | ARHGEF12          | -2,063149277 | -2,408705138 | 0,34555586  |  |
| 215988_s_at  | DLG1              | -2,063149277 | -2,408705138 | 0,34555586  |  |
| 216782_at    | -                 | -2,063149277 | -2,408705138 | 0,34555586  |  |
| 216829_at    | IGK@ /// IGKC /// | -2,063149277 | -2,408705138 | 0,34555586  |  |
| 217695_x_at  | -                 | -2,063149277 | -2,408705138 | 0,34555586  |  |
| 220065_at    | TNMD              | -2,063149277 | -2,408705138 | 0,34555586  |  |
| 223573_s_at  | PPP2R2C           | -2,063149277 | -2,408705138 | 0,34555586  |  |
| 227519_at    | PLAC4             | -2,063149277 | -2,408705138 | 0,34555586  |  |
| 230042_at    | ITSN1             | -2,063149277 | -2,408705138 | 0,34555586  |  |
| 232853_at    | -                 | -2,063149277 | -2,408705138 | 0,34555586  |  |

|             |                  |              |              |             |  |
|-------------|------------------|--------------|--------------|-------------|--|
| 234029_at   | PCDHGB8P         | -2,063149277 | -2,408705138 | 0,34555586  |  |
| 234717_at   | -                | -2,063149277 | -2,408705138 | 0,34555586  |  |
| 238291_at   | UFL1             | -2,063149277 | -2,408705138 | 0,34555586  |  |
| 238344_at   | -                | -2,063149277 | -2,408705138 | 0,34555586  |  |
| 242412_at   | -                | -2,063149277 | -2,408705138 | 0,34555586  |  |
| 243119_at   | -                | -2,063149277 | -2,408705138 | 0,34555586  |  |
| 243832_at   | -                | -2,063149277 | -2,408705138 | 0,34555586  |  |
| 1562033_at  | -                | -1,196375121 | -1,541908042 | 0,34553292  |  |
| 207221_at   | F2RL3            | -1,196375121 | -1,541908042 | 0,34553292  |  |
| 209844_at   | HOXB13           | -1,196375121 | -1,541908042 | 0,34553292  |  |
| 209975_at   | CYP2E1           | -1,196375121 | -1,541908042 | 0,34553292  |  |
| 210724_at   | EMR3             | -1,196375121 | -1,541908042 | 0,34553292  |  |
| 211916_s_at | MYO1A            | -1,196375121 | -1,541908042 | 0,34553292  |  |
| 220522_at   | CRB1             | -1,196375121 | -1,541908042 | 0,34553292  |  |
| 221074_at   | -                | -1,196375121 | -1,541908042 | 0,34553292  |  |
| 225688_s_at | PHLDB2           | -1,196375121 | -1,541908042 | 0,34553292  |  |
| 230343_at   | -                | -1,196375121 | -1,541908042 | 0,34553292  |  |
| 232626_at   | -                | -1,196375121 | -1,541908042 | 0,34553292  |  |
| 235453_at   | TOR1AIP2         | -1,196375121 | -1,541908042 | 0,34553292  |  |
| 239131_at   | -                | -1,196375121 | -1,541908042 | 0,34553292  |  |
| 241208_at   | PDLIM5           | -1,196375121 | -1,541908042 | 0,34553292  |  |
| 204194_at   | BACH1            | 2,718233611  | 2,372786857  | 0,345446754 |  |
| 216862_s_at | MTCP1NB          | 1,987559146  | 1,642321262  | 0,345237884 |  |
| 207376_at   | VENTX            | -0,221656139 | -0,566887459 | 0,345231321 |  |
| 210610_at   | CEACAM1          | -0,221656139 | -0,566887459 | 0,345231321 |  |
| 216377_x_at | ALPL2            | -0,221656139 | -0,566887459 | 0,345231321 |  |
| 218173_s_at | WHSC1L1          | -0,221656139 | -0,566887459 | 0,345231321 |  |
| 222965_at   | PRO2214          | -0,221656139 | -0,566887459 | 0,345231321 |  |
| 235288_at   | -                | -0,221656139 | -0,566887459 | 0,345231321 |  |
| 241152_at   | -                | -0,221656139 | -0,566887459 | 0,345231321 |  |
| 244216_at   | -                | -0,221656139 | -0,566887459 | 0,345231321 |  |
| 228769_at   | ZSCAN22          | 1,238353345  | 0,893473268  | 0,344880077 |  |
| 202050_s_at | ZMYM4            | 2,883642771  | 2,538891651  | 0,34475112  |  |
| 217803_at   | GOLPH3           | 4,898420203  | 4,553720057  | 0,344700146 |  |
| 1558166_at  | MGC16275         | -1,518072576 | -1,862647763 | 0,344575187 |  |
| 1560208_at  | -                | -1,518072576 | -1,862647763 | 0,344575187 |  |
| 1564157_at  | FLJ33544         | -1,518072576 | -1,862647763 | 0,344575187 |  |
| 206603_at   | SLC2A4           | -1,518072576 | -1,862647763 | 0,344575187 |  |
| 210957_s_at | AFF2             | -1,518072576 | -1,862647763 | 0,344575187 |  |
| 214562_at   | HIST1H4A /// HIS | -1,518072576 | -1,862647763 | 0,344575187 |  |
| 215298_at   | -                | -1,518072576 | -1,862647763 | 0,344575187 |  |
| 233583_at   | -                | -1,518072576 | -1,862647763 | 0,344575187 |  |
| 241766_at   | LOC100509303     | -1,518072576 | -1,862647763 | 0,344575187 |  |
| 243351_at   | FLJ31485         | -1,518072576 | -1,862647763 | 0,344575187 |  |
| 227040_at   | NHLRC3           | 2,402750389  | 2,058399602  | 0,344350787 |  |
| 214126_at   | -                | 1,567778694  | 1,223626587  | 0,344152106 |  |
| 233186_s_at | BANP             | 2,194816625  | 1,85068474   | 0,344131885 |  |
| 204994_at   | MX2              | 0,351548291  | 0,007421914  | 0,344126377 |  |
| 209968_s_at | NCAM1            | 0,351548291  | 0,007421914  | 0,344126377 |  |
| 228640_at   | PCDH7            | 0,351548291  | 0,007421914  | 0,344126377 |  |
| 226696_at   | RBBP9            | 2,134723057  | 1,790660532  | 0,344062525 |  |
| 204568_at   | ATG14            | 2,716594694  | 2,372786857  | 0,343807837 |  |
| 210461_s_at | ABLIM1           | 0,123193849  | -0,220592223 | 0,343786073 |  |
| 216535_at   | CADM3            | 0,123193849  | -0,220592223 | 0,343786073 |  |
| 231816_s_at | UBE2Q1           | 0,123193849  | -0,220592223 | 0,343786073 |  |
| 200639_s_at | YWHAZ            | 5,963472883  | 5,619727846  | 0,343745037 |  |

|              |              |              |              |             |  |
|--------------|--------------|--------------|--------------|-------------|--|
| 212097_at    | CAV1         | 5,535001352  | 5,191315431  | 0,343685922 |  |
| 229419_at    | FBXW7        | 1,774096855  | 1,43051703   | 0,343579825 |  |
| 210991_s_at  | RIMS3        | 0,020670649  | -0,322870281 | 0,343540931 |  |
| 227126_at    | PTPRG        | 0,020670649  | -0,322870281 | 0,343540931 |  |
| 228561_at    | CDC37L1      | 0,020670649  | -0,322870281 | 0,343540931 |  |
| 233266_at    | -            | 0,020670649  | -0,322870281 | 0,343540931 |  |
| 236131_at    | -            | 0,020670649  | -0,322870281 | 0,343540931 |  |
| 238454_at    | ZNF540       | 0,020670649  | -0,322870281 | 0,343540931 |  |
| 1553139_s_at | PLXNA3       | -0,512251684 | -0,855751026 | 0,343499342 |  |
| 1554219_at   | -            | -0,512251684 | -0,855751026 | 0,343499342 |  |
| 1555196_at   | LINC00421    | -0,512251684 | -0,855751026 | 0,343499342 |  |
| 1560866_at   | WNK2         | -0,512251684 | -0,855751026 | 0,343499342 |  |
| 210323_at    | TEKT2        | -0,512251684 | -0,855751026 | 0,343499342 |  |
| 211658_at    | PRDX2        | -0,512251684 | -0,855751026 | 0,343499342 |  |
| 211791_s_at  | KCNAB2       | -0,512251684 | -0,855751026 | 0,343499342 |  |
| 214386_at    | LOC100653164 | -0,512251684 | -0,855751026 | 0,343499342 |  |
| 226359_at    | GTPBP1       | -0,512251684 | -0,855751026 | 0,343499342 |  |
| 226658_at    | PDPN         | -0,512251684 | -0,855751026 | 0,343499342 |  |
| 229132_at    | MINA         | -0,512251684 | -0,855751026 | 0,343499342 |  |
| 203485_at    | RTN1         | 2,994644467  | 2,651169275  | 0,343475192 |  |
| 1554769_at   | ZNF785       | -0,706943342 | -1,050406615 | 0,343463273 |  |
| 1568590_at   | ARL3         | -0,706943342 | -1,050406615 | 0,343463273 |  |
| 206322_at    | SYN3         | -0,706943342 | -1,050406615 | 0,343463273 |  |
| 211837_s_at  | PTCRA        | -0,706943342 | -1,050406615 | 0,343463273 |  |
| 215776_at    | INSRR        | -0,706943342 | -1,050406615 | 0,343463273 |  |
| 231868_at    | HOMEZ        | -0,706943342 | -1,050406615 | 0,343463273 |  |
| 234654_at    | -            | -0,706943342 | -1,050406615 | 0,343463273 |  |
| 237319_at    | C2orf53      | -0,706943342 | -1,050406615 | 0,343463273 |  |
| 239912_at    | -            | -0,706943342 | -1,050406615 | 0,343463273 |  |
| 240339_at    | -            | -0,706943342 | -1,050406615 | 0,343463273 |  |
| 243145_at    | -            | -0,706943342 | -1,050406615 | 0,343463273 |  |
| 243223_at    | -            | -0,706943342 | -1,050406615 | 0,343463273 |  |
| 225971_at    | DDHD1        | 2,710020346  | 2,366632651  | 0,343387695 |  |
| 224311_s_at  | CAB39        | 2,355089531  | 2,011838132  | 0,343251399 |  |
| 216028_at    | -            | 1,534677255  | 1,191491281  | 0,343185974 |  |
| 1565633_at   | -            | -2,930741289 | -3,273861381 | 0,343120092 |  |
| 207166_at    | GNGT1        | -2,930741289 | -3,273861381 | 0,343120092 |  |
| 236035_at    | -            | -2,930741289 | -3,273861381 | 0,343120092 |  |
| 216421_at    | -            | 1,496984567  | 1,153866761  | 0,343117806 |  |
| 231979_at    | -            | 0,822971223  | 0,479907041  | 0,343064182 |  |
| 212904_at    | LRRC47       | 5,37849084   | 5,035495453  | 0,342995387 |  |
| 202972_s_at  | FAM13A       | 0,760715727  | 0,417770464  | 0,342945263 |  |
| 229544_at    | -            | 1,823660386  | 1,480766833  | 0,342893553 |  |
| 1559220_at   | -            | 0,695652136  | 0,352836757  | 0,342815379 |  |
| 212326_at    | VPS13D       | 0,695652136  | 0,352836757  | 0,342815379 |  |
| 220775_s_at  | UEVLD        | 0,695652136  | 0,352836757  | 0,342815379 |  |
| 221857_s_at  | TJAP1        | 0,695652136  | 0,352836757  | 0,342815379 |  |
| 229338_at    | LOC100289361 | 0,695652136  | 0,352836757  | 0,342815379 |  |
| 1553166_at   | CDH24        | -0,148196756 | -0,490927335 | 0,342730579 |  |
| 205451_at    | FOXO4        | -0,148196756 | -0,490927335 | 0,342730579 |  |
| 242812_at    | HCG18        | -0,148196756 | -0,490927335 | 0,342730579 |  |
| 1554518_at   | GSTCD        | 1,247462054  | 0,904843258  | 0,342618795 |  |
| 220306_at    | FAM46C       | 1,247462054  | 0,904843258  | 0,342618795 |  |
| 202980_s_at  | SIAH1        | 1,177702228  | 0,835239052  | 0,342463175 |  |
| 1553842_at   | BEND2        | -2,504600601 | -2,847001814 | 0,342401213 |  |
| 1554403_a_at | -            | -2,504600601 | -2,847001814 | 0,342401213 |  |



|              |                |              |              |             |  |
|--------------|----------------|--------------|--------------|-------------|--|
| 1558920_at   | SLC8A1-AS1     | -2,504600601 | -2,847001814 | 0,342401213 |  |
| 1558934_a_at | GTF2H5         | -2,504600601 | -2,847001814 | 0,342401213 |  |
| 1564307_a_at | A2ML1          | -2,504600601 | -2,847001814 | 0,342401213 |  |
| 1564372_s_at | CASC2          | -2,504600601 | -2,847001814 | 0,342401213 |  |
| 1567703_at   | -              | -2,504600601 | -2,847001814 | 0,342401213 |  |
| 1569208_a_at | -              | -2,504600601 | -2,847001814 | 0,342401213 |  |
| 1569892_at   | -              | -2,504600601 | -2,847001814 | 0,342401213 |  |
| 213425_at    | WNT5A          | -2,504600601 | -2,847001814 | 0,342401213 |  |
| 217452_s_at  | B3GALT2        | -2,504600601 | -2,847001814 | 0,342401213 |  |
| 219850_s_at  | EHF            | -2,504600601 | -2,847001814 | 0,342401213 |  |
| 221288_at    | GPR22          | -2,504600601 | -2,847001814 | 0,342401213 |  |
| 233154_at    | -              | -2,504600601 | -2,847001814 | 0,342401213 |  |
| 234138_at    | -              | -2,504600601 | -2,847001814 | 0,342401213 |  |
| 240712_s_at  | -              | -2,504600601 | -2,847001814 | 0,342401213 |  |
| 243665_s_at  | -              | -2,504600601 | -2,847001814 | 0,342401213 |  |
| 1557277_a_at | LOC100507584   | -2,756478458 | -3,098858316 | 0,342379858 |  |
| 1569755_at   | LINC00276      | -2,756478458 | -3,098858316 | 0,342379858 |  |
| 217705_at    | PRKD1          | -2,756478458 | -3,098858316 | 0,342379858 |  |
| 224277_at    | MOP-1          | -2,756478458 | -3,098858316 | 0,342379858 |  |
| 230692_at    | LOC157503      | -2,756478458 | -3,098858316 | 0,342379858 |  |
| 234544_at    | ARHGEF12       | -2,756478458 | -3,098858316 | 0,342379858 |  |
| 235380_at    | -              | -2,756478458 | -3,098858316 | 0,342379858 |  |
| 235401_s_at  | FCRLA          | -2,756478458 | -3,098858316 | 0,342379858 |  |
| 1552914_a_at | CD276          | -0,423248115 | -0,765504029 | 0,342255914 |  |
| 1557347_at   | MCPH1          | -0,423248115 | -0,765504029 | 0,342255914 |  |
| 1564339_a_at | CHRM3          | -0,423248115 | -0,765504029 | 0,342255914 |  |
| 230310_at    | -              | -0,423248115 | -0,765504029 | 0,342255914 |  |
| 236460_at    | -              | -0,423248115 | -0,765504029 | 0,342255914 |  |
| 242393_x_at  | AGAP9 /// BMS1 | -0,423248115 | -0,765504029 | 0,342255914 |  |
| 1554839_at   | CIDECP         | 0,401366113  | 0,059218869  | 0,342147244 |  |
| 217702_at    | IL27RA         | 0,317354302  | -0,024572586 | 0,341926888 |  |
| 204716_at    | CCDC6          | 1,732533761  | 1,390636111  | 0,34189765  |  |
| 235598_at    | SMAD2          | 0,945567441  | 0,603679647  | 0,341887795 |  |
| 215716_s_at  | ATP2B1         | 2,41290634   | 2,071071048  | 0,341835292 |  |
| 211764_s_at  | UBE2D1         | 2,683419202  | 2,341749893  | 0,341669309 |  |
| 214356_s_at  | KIAA0368       | 2,683419202  | 2,341749893  | 0,341669309 |  |
| 215772_x_at  | SUCLG2         | 2,64946283   | 2,307890888  | 0,341571942 |  |
| 219353_at    | NHLRC2         | 1,274448124  | 0,932882274  | 0,34156585  |  |
| 239721_at    | -              | 0,181384709  | -0,160136748 | 0,341521458 |  |
| 208328_s_at  | MEF2A          | 1,859746653  | 1,518263577  | 0,341483076 |  |
| 201097_s_at  | ARF4           | 6,563911807  | 6,222493151  | 0,341418656 |  |
| 204461_x_at  | RAD1           | 3,336243945  | 2,994948944  | 0,341295001 |  |
| 232137_at    | ZNF616         | 0,735041319  | 0,393761504  | 0,341279815 |  |
| 234140_s_at  | STIM2          | 1,485482016  | 1,144305291  | 0,341176725 |  |
| 1556247_a_at | LOC100506271   | 0,083054335  | -0,258114234 | 0,341168569 |  |
| 204562_at    | IRF4           | 0,083054335  | -0,258114234 | 0,341168569 |  |
| 207566_at    | MR1            | 0,083054335  | -0,258114234 | 0,341168569 |  |
| 221140_s_at  | GPR132         | 0,083054335  | -0,258114234 | 0,341168569 |  |
| 228831_s_at  | GNG7           | 0,083054335  | -0,258114234 | 0,341168569 |  |
| 235447_at    | TRUB1          | 0,083054335  | -0,258114234 | 0,341168569 |  |
| 225891_at    | TPRN           | 1,406361373  | 1,065442793  | 0,34091858  |  |
| 220947_s_at  | TBC1D10B       | 2,644299732  | 2,303602088  | 0,340697644 |  |
| 225019_at    | CAMK2D         | 3,046446467  | 2,705818724  | 0,340627743 |  |
| 216545_at    | -              | -0,078265071 | -0,41858459  | 0,340319518 |  |
| 220645_at    | NXPE4          | -0,078265071 | -0,41858459  | 0,340319518 |  |
| 241448_at    | -              | -0,078265071 | -0,41858459  | 0,340319518 |  |

|              |                 |              |              |             |  |
|--------------|-----------------|--------------|--------------|-------------|--|
| 242207_at    | CENPP /// LOC10 | -0,078265071 | -0,41858459  | 0,340319518 |  |
| 1555311_at   | -               | 1,233777334  | 0,893473268  | 0,340304066 |  |
| 202757_at    | COBRA1          | 3,340506684  | 3,000258961  | 0,340247724 |  |
| 209627_s_at  | OSBPL3          | 1,187200746  | 0,847075464  | 0,340125283 |  |
| 218685_s_at  | SMUG1           | 1,187200746  | 0,847075464  | 0,340125283 |  |
| 226109_at    | C21orf91        | 3,804253954  | 3,464222256  | 0,340031698 |  |
| 230055_at    | KHDC1           | 1,655931423  | 1,315948728  | 0,339982695 |  |
| 224953_at    | YIPF5           | 3,107750584  | 2,767843855  | 0,339906729 |  |
| 1555916_at   | RPUSD3          | 1,820612054  | 1,480766833  | 0,339845221 |  |
| 225088_at    | FOPNL           | 2,947914474  | 2,608344689  | 0,339569785 |  |
| 225023_at    | GOPC            | 2,675004741  | 2,335461563  | 0,339543178 |  |
| 217211_at    | -               | 3,219589925  | 2,880111483  | 0,339478442 |  |
| 225281_at    | C3orf17         | 4,225494449  | 3,886022844  | 0,339471605 |  |
| 201282_at    | OGDH            | 1,709647566  | 1,370274469  | 0,339373096 |  |
| 1554258_a_at | DNAJC5B         | -0,196756757 | -0,536087151 | 0,339330394 |  |
| 1569194_at   | ZNF789          | -0,196756757 | -0,536087151 | 0,339330394 |  |
| 207004_at    | BCL2            | -0,196756757 | -0,536087151 | 0,339330394 |  |
| 240434_at    | -               | 1,493160564  | 1,153866761  | 0,339293803 |  |
| 212006_at    | UBXN4           | 3,526916747  | 3,187631636  | 0,339285111 |  |
| 242131_at    | ATP6            | 2,701760055  | 2,362515214  | 0,339244842 |  |
| 203335_at    | PHYH            | 3,517535002  | 3,178292062  | 0,33924294  |  |
| 214639_s_at  | HOXA1           | 1,67631007   | 1,337086025  | 0,339224046 |  |
| 1569091_at   | -               | 0,606430281  | 0,26733076   | 0,339099522 |  |
| 224613_s_at  | DNAJC5          | 0,606430281  | 0,26733076   | 0,339099522 |  |
| 221808_at    | RAB9A           | 4,551591289  | 4,212565608  | 0,339025681 |  |
| 201572_x_at  | DCTD            | 3,792633459  | 3,453616097  | 0,339017362 |  |
| 1555839_a_at | C3orf79         | -2,551294263 | -2,89013181  | 0,338837547 |  |
| 1557434_at   | LOC100506497    | -2,551294263 | -2,89013181  | 0,338837547 |  |
| 1557864_x_at | -               | -2,551294263 | -2,89013181  | 0,338837547 |  |
| 1558944_at   | LOC100507353    | -2,551294263 | -2,89013181  | 0,338837547 |  |
| 1559645_at   | LINC00184       | -2,551294263 | -2,89013181  | 0,338837547 |  |
| 1563670_at   | ZSCAN23         | -2,551294263 | -2,89013181  | 0,338837547 |  |
| 1569706_at   | MYSM1           | -2,551294263 | -2,89013181  | 0,338837547 |  |
| 210170_at    | PDLIM3          | -2,551294263 | -2,89013181  | 0,338837547 |  |
| 213353_at    | ABCA5           | -2,551294263 | -2,89013181  | 0,338837547 |  |
| 220026_at    | CLCA4           | -2,551294263 | -2,89013181  | 0,338837547 |  |
| 228400_at    | SHROOM3         | -2,551294263 | -2,89013181  | 0,338837547 |  |
| 231186_at    | FLJ43390        | -2,551294263 | -2,89013181  | 0,338837547 |  |
| 232750_at    | -               | -2,551294263 | -2,89013181  | 0,338837547 |  |
| 232885_at    | BBIP1           | -2,551294263 | -2,89013181  | 0,338837547 |  |
| 233351_at    | -               | -2,551294263 | -2,89013181  | 0,338837547 |  |
| 235004_at    | RBM24           | -2,551294263 | -2,89013181  | 0,338837547 |  |
| 241113_at    | -               | -2,551294263 | -2,89013181  | 0,338837547 |  |
| 241247_at    | -               | -2,551294263 | -2,89013181  | 0,338837547 |  |
| 237032_x_at  | SIPA1L1         | 0,87091093   | 0,532164371  | 0,338746559 |  |
| 217761_at    | ADI1            | 4,510092468  | 4,171380634  | 0,338711834 |  |
| 1569403_at   | -               | 1,352503698  | 1,013870809  | 0,338632889 |  |
| 242908_x_at  | -               | -2,972500237 | -3,311072652 | 0,338572415 |  |
| 1569839_s_at | LRRC37A5P       | -1,399512875 | -1,738067356 | 0,338554481 |  |
| 204239_s_at  | NNAT            | -1,399512875 | -1,738067356 | 0,338554481 |  |
| 206062_at    | GUCA1A          | -1,399512875 | -1,738067356 | 0,338554481 |  |
| 207991_x_at  | ACRV1           | -1,399512875 | -1,738067356 | 0,338554481 |  |
| 211011_at    | COL19A1         | -1,399512875 | -1,738067356 | 0,338554481 |  |
| 221383_at    | NMUR1           | -1,399512875 | -1,738067356 | 0,338554481 |  |
| 228313_at    | GPRC5B          | -1,399512875 | -1,738067356 | 0,338554481 |  |
| 229652_s_at  | FOXN3           | -1,399512875 | -1,738067356 | 0,338554481 |  |

|              |              |              |              |             |  |
|--------------|--------------|--------------|--------------|-------------|--|
| 230768_at    | -            | -1,399512875 | -1,738067356 | 0,338554481 |  |
| 231067_s_at  | -            | -1,399512875 | -1,738067356 | 0,338554481 |  |
| 237845_at    | -            | -1,399512875 | -1,738067356 | 0,338554481 |  |
| 239374_at    | TRIM65       | -1,399512875 | -1,738067356 | 0,338554481 |  |
| 240861_at    | -            | -1,399512875 | -1,738067356 | 0,338554481 |  |
| 243199_at    | LOC100505574 | -1,399512875 | -1,738067356 | 0,338554481 |  |
| 1555878_at   | RPS24        | 3,176127502  | 2,837730973  | 0,338396529 |  |
| 1556250_at   | -            | -2,236765673 | -2,575129729 | 0,338364056 |  |
| 1557012_a_at | -            | -2,236765673 | -2,575129729 | 0,338364056 |  |
| 1561983_at   | -            | -2,236765673 | -2,575129729 | 0,338364056 |  |
| 1566863_at   | -            | -2,236765673 | -2,575129729 | 0,338364056 |  |
| 201617_x_at  | CALD1        | -2,236765673 | -2,575129729 | 0,338364056 |  |
| 207796_x_at  | KLRD1        | -2,236765673 | -2,575129729 | 0,338364056 |  |
| 215219_at    | DOPEY2       | -2,236765673 | -2,575129729 | 0,338364056 |  |
| 216147_at    | -            | -2,236765673 | -2,575129729 | 0,338364056 |  |
| 216367_at    | COL4A3       | -2,236765673 | -2,575129729 | 0,338364056 |  |
| 220338_at    | RALGPS2      | -2,236765673 | -2,575129729 | 0,338364056 |  |
| 221386_at    | OR3A2        | -2,236765673 | -2,575129729 | 0,338364056 |  |
| 221420_at    | -            | -2,236765673 | -2,575129729 | 0,338364056 |  |
| 224537_at    | PCDHGC5      | -2,236765673 | -2,575129729 | 0,338364056 |  |
| 225846_at    | ESRP1        | -2,236765673 | -2,575129729 | 0,338364056 |  |
| 227648_at    | C22orf32     | -2,236765673 | -2,575129729 | 0,338364056 |  |
| 230258_at    | GLIS3        | -2,236765673 | -2,575129729 | 0,338364056 |  |
| 235642_at    | -            | -2,236765673 | -2,575129729 | 0,338364056 |  |
| 236341_at    | CTLA4        | -2,236765673 | -2,575129729 | 0,338364056 |  |
| 237471_at    | LOC154822    | -2,236765673 | -2,575129729 | 0,338364056 |  |
| 242548_x_at  | ANKRD37      | -2,236765673 | -2,575129729 | 0,338364056 |  |
| 218962_s_at  | TMEM168      | 2,516380342  | 2,17802703   | 0,338353312 |  |
| 226030_at    | ACADSB       | 2,396622324  | 2,058399602  | 0,338222722 |  |
| 1554430_at   | FAM165B      | 0,417596971  | 0,079428135  | 0,338168835 |  |
| 222859_s_at  | DAPP1        | 0,417596971  | 0,079428135  | 0,338168835 |  |
| 235301_at    | KIAA1324L    | 1,780386218  | 1,442269454  | 0,338116764 |  |
| 44111_at     | VPS33B       | 2,36034699   | 2,022315766  | 0,338031224 |  |
| 228485_s_at  | SLC44A1      | 0,715481152  | 0,377530647  | 0,337950505 |  |
| 1566403_at   | SNORA68      | -0,57445847  | -0,912331589 | 0,337873119 |  |
| 209639_s_at  | RGS12        | -0,57445847  | -0,912331589 | 0,337873119 |  |
| 215369_at    | -            | -0,57445847  | -0,912331589 | 0,337873119 |  |
| 231906_at    | HOXD8        | -0,57445847  | -0,912331589 | 0,337873119 |  |
| 237167_at    | KIAA1217     | -0,57445847  | -0,912331589 | 0,337873119 |  |
| 239293_at    | NRSN1        | -0,57445847  | -0,912331589 | 0,337873119 |  |
| 239337_at    | LOC400768    | -0,57445847  | -0,912331589 | 0,337873119 |  |
| 202205_at    | VASP         | 3,584658878  | 3,246908183  | 0,337750695 |  |
| 226327_at    | ZNF507       | 3,367911651  | 3,030417996  | 0,337493655 |  |
| 210680_s_at  | MASP1        | 0,291166226  | -0,046302147 | 0,337468373 |  |
| 225869_s_at  | UNC93B1      | 0,291166226  | -0,046302147 | 0,337468373 |  |
| 229195_at    | MESP1        | 0,291166226  | -0,046302147 | 0,337468373 |  |
| 209954_x_at  | SS18         | 1,799091453  | 1,461646549  | 0,337444904 |  |
| 213340_s_at  | TP73-AS1     | 2,420979937  | 2,083632167  | 0,33734777  |  |
| 1566599_at   | -            | -0,67289328  | -1,010192375 | 0,337299095 |  |
| 204540_at    | EEF1A2       | -0,67289328  | -1,010192375 | 0,337299095 |  |
| 206753_at    | RDH16        | -0,67289328  | -1,010192375 | 0,337299095 |  |
| 210684_s_at  | DLG4         | -0,67289328  | -1,010192375 | 0,337299095 |  |
| 217162_at    | -            | -0,67289328  | -1,010192375 | 0,337299095 |  |
| 229951_x_at  | -            | -0,67289328  | -1,010192375 | 0,337299095 |  |
| 234342_at    | FAM20C       | -0,67289328  | -1,010192375 | 0,337299095 |  |
| 236672_at    | ZNF681       | -0,67289328  | -1,010192375 | 0,337299095 |  |

|              |              |              |              |             |  |
|--------------|--------------|--------------|--------------|-------------|--|
| 238377_s_at  | -            | -0,67289328  | -1,010192375 | 0,337299095 |  |
| 243076_x_at  | GLI4         | -0,67289328  | -1,010192375 | 0,337299095 |  |
| 244844_at    | -            | -0,67289328  | -1,010192375 | 0,337299095 |  |
| 217876_at    | GTF3C5       | 1,631786706  | 1,294497133  | 0,337289573 |  |
| 213342_at    | YAP1         | -0,926850548 | -1,264005341 | 0,337154792 |  |
| 217569_x_at  | -            | -0,926850548 | -1,264005341 | 0,337154792 |  |
| 231346_s_at  | -            | -0,926850548 | -1,264005341 | 0,337154792 |  |
| 232788_at    | -            | -0,926850548 | -1,264005341 | 0,337154792 |  |
| 234770_at    | -            | -0,926850548 | -1,264005341 | 0,337154792 |  |
| 239796_x_at  | TIRAP        | -0,926850548 | -1,264005341 | 0,337154792 |  |
| 244702_at    | -            | -0,926850548 | -1,264005341 | 0,337154792 |  |
| 209062_x_at  | NCOA3        | 1,269985355  | 0,932882274  | 0,337103081 |  |
| 223555_at    | GON4L        | 1,269985355  | 0,932882274  | 0,337103081 |  |
| 1568815_a_at | DDX50        | 1,442503549  | 1,105412836  | 0,337090713 |  |
| 244676_s_at  | MTUS2        | 0,541261317  | 0,204310755  | 0,336950561 |  |
| 226921_at    | UBR1         | 4,279221286  | 3,942281595  | 0,33693969  |  |
| 221904_at    | FAM131A      | 0,20027154   | -0,136643983 | 0,336915522 |  |
| 226919_at    | LYRM2        | 2,31665944   | 1,979940779  | 0,336718661 |  |
| 209370_s_at  | SH3BP2       | 1,201332287  | 0,864649967  | 0,33668232  |  |
| 209349_at    | RAD50        | 0,995078803  | 0,658444279  | 0,336634524 |  |
| 213518_at    | PRKCI        | 4,28917944   | 3,952590169  | 0,336589271 |  |
| 224760_at    | SP1          | 3,464815649  | 3,128242026  | 0,336573623 |  |
| 225128_at    | KDELC2       | 1,995690482  | 1,659204017  | 0,336486466 |  |
| 213306_at    | MPDZ         | 2,361396186  | 2,024923328  | 0,336472859 |  |
| 204630_s_at  | GOSR1        | 3,552865637  | 3,216434104  | 0,336431533 |  |
| 241342_at    | TMEM65       | 1,46610492   | 1,129843209  | 0,336261711 |  |
| 1556507_at   | LOC100507274 | 2,038300149  | 1,702196344  | 0,336103805 |  |
| 1569074_at   | SRRM3        | -0,394749123 | -0,730778808 | 0,336029685 |  |
| 210031_at    | CD247        | -0,394749123 | -0,730778808 | 0,336029685 |  |
| 217413_s_at  | TNXB         | -0,394749123 | -0,730778808 | 0,336029685 |  |
| 223459_s_at  | C1orf56      | -0,394749123 | -0,730778808 | 0,336029685 |  |
| 229006_at    | LOC100507487 | -0,394749123 | -0,730778808 | 0,336029685 |  |
| 239785_at    | DZIP1L       | -0,394749123 | -0,730778808 | 0,336029685 |  |
| 242373_at    | -            | -0,394749123 | -0,730778808 | 0,336029685 |  |
| 205233_s_at  | PAFAH2       | 0,052199481  | -0,283667828 | 0,335867308 |  |
| 205383_s_at  | ZBTB20       | 0,052199481  | -0,283667828 | 0,335867308 |  |
| 229771_at    | MAP3K13      | 0,052199481  | -0,283667828 | 0,335867308 |  |
| 234647_at    | KCNIP3       | 0,052199481  | -0,283667828 | 0,335867308 |  |
| 207350_s_at  | VAMP4        | 0,853119696  | 0,51742585   | 0,335693846 |  |
| 222164_at    | FGFR1        | 0,853119696  | 0,51742585   | 0,335693846 |  |
| 212460_at    | SPTSSA       | 5,543346316  | 5,207761432  | 0,335584884 |  |
| 207564_x_at  | OGT          | 2,355089531  | 2,019703483  | 0,335386048 |  |
| 230413_s_at  | -            | 5,215731134  | 4,880355851  | 0,335375283 |  |
| 200749_at    | RAN          | 4,76563534   | 4,430312399  | 0,335322941 |  |
| 210296_s_at  | PEX2         | 3,277429131  | 2,942125533  | 0,335303597 |  |
| 219012_s_at  | C11orf30     | 0,792179257  | 0,456918297  | 0,335260959 |  |
| 1552845_at   | CLDN15       | 0,97328325   | 0,638150376  | 0,335132874 |  |
| 205716_at    | SLC25A40     | 0,97328325   | 0,638150376  | 0,335132874 |  |
| 1555393_s_at | C21orf67     | 0,255492549  | -0,079522948 | 0,335015497 |  |
| 232727_at    | UCKL1        | 0,255492549  | -0,079522948 | 0,335015497 |  |
| 235896_s_at  | SMCR7        | 0,255492549  | -0,079522948 | 0,335015497 |  |
| 225679_at    | NAA30        | 3,689469311  | 3,354479478  | 0,334989833 |  |
| 205668_at    | LY75         | 2,146943689  | 1,811954245  | 0,334989445 |  |
| 230078_at    | RAPGEF6      | 4,056345228  | 3,721356767  | 0,334988461 |  |
| 205585_at    | ETV6         | -0,055687482 | -0,39061235  | 0,334924868 |  |
| 242218_at    | LOC100507672 | -0,055687482 | -0,39061235  | 0,334924868 |  |

|             |                  |              |              |             |  |
|-------------|------------------|--------------|--------------|-------------|--|
| 205632_s_at | PIP5K1B          | 2,482063962  | 2,147243253  | 0,334820709 |  |
| 231164_at   | ABCA17P          | 3,456984333  | 3,122166354  | 0,334817978 |  |
| 213212_x_at | GOLGA6L3 /// G   | 1,607231019  | 1,272721751  | 0,334509268 |  |
| 213282_at   | APOOL            | 2,827046023  | 2,492544876  | 0,334501148 |  |
| 223436_s_at | TRPT1            | 1,348276312  | 1,013870809  | 0,334405503 |  |
| 155885_at   | -                | -1,089016378 | -1,423348341 | 0,334331964 |  |
| 1570285_at  | -                | -1,089016378 | -1,423348341 | 0,334331964 |  |
| 206058_at   | SLC6A12          | -1,089016378 | -1,423348341 | 0,334331964 |  |
| 207303_at   | PDE1C            | -1,089016378 | -1,423348341 | 0,334331964 |  |
| 217676_at   | -                | -1,089016378 | -1,423348341 | 0,334331964 |  |
| 217687_at   | ADCY2            | -1,089016378 | -1,423348341 | 0,334331964 |  |
| 220334_at   | RGS17            | -1,089016378 | -1,423348341 | 0,334331964 |  |
| 222963_s_at | IL1RAPL1         | -1,089016378 | -1,423348341 | 0,334331964 |  |
| 226618_at   | UBE2QL1          | -1,089016378 | -1,423348341 | 0,334331964 |  |
| 227062_at   | LOC100653017 /   | -1,089016378 | -1,423348341 | 0,334331964 |  |
| 232011_s_at | MAP1LC3A         | -1,089016378 | -1,423348341 | 0,334331964 |  |
| 218393_s_at | SMU1             | 2,680059304  | 2,345926937  | 0,334132368 |  |
| 205596_s_at | SMURF2           | 1,764611101  | 1,43051703   | 0,33409407  |  |
| 213180_s_at | GOSR2            | 1,764611101  | 1,43051703   | 0,33409407  |  |
| 213562_s_at | SQLE             | 4,279776324  | 3,945725977  | 0,334050346 |  |
| 1554071_at  | CCDC67           | -3,013665402 | -3,347710726 | 0,334045324 |  |
| 1563503_at  | -                | -3,013665402 | -3,347710726 | 0,334045324 |  |
| 206552_s_at | TAC1             | -3,013665402 | -3,347710726 | 0,334045324 |  |
| 202250_s_at | DCAF8            | 0,82905153   | 0,495031851  | 0,33401968  |  |
| 241415_at   | -                | 0,627515113  | 0,293518836  | 0,333996277 |  |
| 218884_s_at | GUF1             | 1,814495998  | 1,480766833  | 0,333729165 |  |
| 218689_at   | FANCF            | 1,593009234  | 1,259496994  | 0,33351224  |  |
| 218028_at   | ELOVL1           | 2,546213279  | 2,212749286  | 0,333463993 |  |
| 223288_at   | USP38            | 3,34687727   | 3,013449121  | 0,333428149 |  |
| 1554869_at  | WDR37            | 0,555999837  | 0,222599095  | 0,333400742 |  |
| 212126_at   | CBX5             | 3,069741844  | 2,7363693    | 0,333372544 |  |
| 202622_s_at | ATXN2            | 2,416948786  | 2,083632167  | 0,333316619 |  |
| 218878_s_at | SIRT1            | 2,352981171  | 2,019703483  | 0,333277688 |  |
| 218411_s_at | MBIP             | 2,901063789  | 2,567790814  | 0,333272975 |  |
| 220024_s_at | PRX              | 0,30867765   | -0,024572586 | 0,333250236 |  |
| 200608_s_at | RAD21            | 5,816676661  | 5,483469529  | 0,333207132 |  |
| 218442_at   | TTC4             | 3,408067074  | 3,075135559  | 0,332931515 |  |
| 221240_s_at | B3GNT4           | 1,168140757  | 0,835239052  | 0,332901705 |  |
| 212536_at   | ATP11B           | 3,333038605  | 3,000258961  | 0,332779644 |  |
| 1569114_at  | LOC100506847     | -0,234278768 | -0,566887459 | 0,332608692 |  |
| 210542_s_at | SLCO3A1          | -0,234278768 | -0,566887459 | 0,332608692 |  |
| 228998_at   | TNRC6B           | -0,234278768 | -0,566887459 | 0,332608692 |  |
| 230525_at   | LINC00514 /// LC | -0,234278768 | -0,566887459 | 0,332608692 |  |
| 236064_at   | SLC25A35         | -0,234278768 | -0,566887459 | 0,332608692 |  |
| 240044_x_at | TNRC6B           | -0,234278768 | -0,566887459 | 0,332608692 |  |
| 241802_x_at | GRM2             | -0,234278768 | -0,566887459 | 0,332608692 |  |
| 243580_at   | GNA14            | -0,234278768 | -0,566887459 | 0,332608692 |  |
| 244086_at   | -                | -0,234278768 | -0,566887459 | 0,332608692 |  |
| 244339_at   | -                | -0,234278768 | -0,566887459 | 0,332608692 |  |
| 244398_x_at | ZNF684           | -0,234278768 | -0,566887459 | 0,332608692 |  |
| 223428_s_at | ISY1             | 2,206540699  | 1,874012195  | 0,332528505 |  |
| 215622_x_at | PHF7             | 0,44160593   | 0,109221392  | 0,332384538 |  |
| 228762_at   | LFNG             | 0,44160593   | 0,109221392  | 0,332384538 |  |
| 229165_at   | MRPL12           | 0,95671774   | 0,624460759  | 0,332256981 |  |
| 218737_at   | SBNO1            | 3,034656185  | 2,702564916  | 0,332091269 |  |
| 218919_at   | ZFAND1           | 3,621908408  | 3,289820089  | 0,33208832  |  |

|              |                 |              |              |             |  |
|--------------|-----------------|--------------|--------------|-------------|--|
| 225633_at    | DPY19L3         | 5,179605142  | 4,847588869  | 0,332016273 |  |
| 239565_at    | LOC100128292    | 0,171847695  | -0,160136748 | 0,331984444 |  |
| 210819_x_at  | DIO2            | 0,900083947  | 0,568365095  | 0,331718852 |  |
| 203591_s_at  | CSF3R           | -0,888496123 | -1,220210588 | 0,331714465 |  |
| 216825_s_at  | MPL             | -0,888496123 | -1,220210588 | 0,331714465 |  |
| 227923_at    | SHANK3          | -0,888496123 | -1,220210588 | 0,331714465 |  |
| 231441_at    | C7orf62         | -0,888496123 | -1,220210588 | 0,331714465 |  |
| 239760_at    | -               | -0,888496123 | -1,220210588 | 0,331714465 |  |
| 1559343_at   | LOC100506948 /  | 0,359971644  | 0,028364014  | 0,33160763  |  |
| 1565832_at   | -               | 0,359971644  | 0,028364014  | 0,33160763  |  |
| 1567032_s_at | ZNF160          | 0,359971644  | 0,028364014  | 0,33160763  |  |
| 217041_at    | NPTXR           | 0,359971644  | 0,028364014  | 0,33160763  |  |
| 1556474_a_at | FLJ38379        | -2,359436556 | -2,690860744 | 0,331424188 |  |
| 1556607_at   | EHD4            | -2,359436556 | -2,690860744 | 0,331424188 |  |
| 1566438_at   | -               | -2,359436556 | -2,690860744 | 0,331424188 |  |
| 207229_at    | KLRAP1          | -2,359436556 | -2,690860744 | 0,331424188 |  |
| 227764_at    | LYPD6           | -2,359436556 | -2,690860744 | 0,331424188 |  |
| 233066_at    | -               | -2,359436556 | -2,690860744 | 0,331424188 |  |
| 234139_s_at  | -               | -2,359436556 | -2,690860744 | 0,331424188 |  |
| 236818_at    | -               | -2,359436556 | -2,690860744 | 0,331424188 |  |
| 240422_at    | -               | -2,359436556 | -2,690860744 | 0,331424188 |  |
| 240439_at    | -               | -2,359436556 | -2,690860744 | 0,331424188 |  |
| 242639_at    | NARG2           | -2,359436556 | -2,690860744 | 0,331424188 |  |
| 243586_at    | -               | -2,359436556 | -2,690860744 | 0,331424188 |  |
| 243650_at    | PLEKHH2         | -2,359436556 | -2,690860744 | 0,331424188 |  |
| 212280_x_at  | ATG4B           | 2,960432227  | 2,629059192  | 0,331373035 |  |
| 222201_s_at  | CASP8AP2        | 3,717599787  | 3,386261038  | 0,331338749 |  |
| 238624_at    | -               | 1,446464021  | 1,115234684  | 0,331229336 |  |
| 227022_at    | GNPDA2          | 1,224581536  | 0,893473268  | 0,331108268 |  |
| 238075_at    | CHEK1           | 2,688444421  | 2,357351836  | 0,331092585 |  |
| 216042_at    | TNFRSF25        | 0,072842263  | -0,258114234 | 0,330956496 |  |
| 219095_at    | JMJD7 /// JMJD7 | 0,072842263  | -0,258114234 | 0,330956496 |  |
| 232342_at    | MTMR14          | 0,072842263  | -0,258114234 | 0,330956496 |  |
| 243092_at    | PAN3-AS1        | 0,072842263  | -0,258114234 | 0,330956496 |  |
| 215438_x_at  | GSPT1           | 5,683961059  | 5,353099844  | 0,330861216 |  |
| 223208_at    | KCTD10          | 2,074578432  | 1,743944487  | 0,330633944 |  |
| 236487_at    | SCLT1           | 1,874520207  | 1,543943227  | 0,330576979 |  |
| 1553208_s_at | -               | -1,2845686   | -1,615132408 | 0,330563807 |  |
| 1557565_a_at | LOC100507300    | -1,2845686   | -1,615132408 | 0,330563807 |  |
| 1559083_x_at | LOC284600       | -1,2845686   | -1,615132408 | 0,330563807 |  |
| 1563143_at   | LOC100507065    | -1,2845686   | -1,615132408 | 0,330563807 |  |
| 1569335_a_at | STRA6           | -1,2845686   | -1,615132408 | 0,330563807 |  |
| 1569353_at   | CCP110          | -1,2845686   | -1,615132408 | 0,330563807 |  |
| 207295_at    | SCNN1G          | -1,2845686   | -1,615132408 | 0,330563807 |  |
| 215216_at    | VPS16           | -1,2845686   | -1,615132408 | 0,330563807 |  |
| 223842_s_at  | SCARA3          | -1,2845686   | -1,615132408 | 0,330563807 |  |
| 233988_x_at  | SCUBE1          | -1,2845686   | -1,615132408 | 0,330563807 |  |
| 237011_at    | LOC643837       | -1,2845686   | -1,615132408 | 0,330563807 |  |
| 240171_at    | -               | -1,2845686   | -1,615132408 | 0,330563807 |  |
| 225816_at    | PHF17           | 2,763383302  | 2,432926755  | 0,330456548 |  |
| 228005_at    | ZXDB            | 2,520143371  | 2,189694216  | 0,330449155 |  |
| 229422_at    | NRD1            | 1,62481334   | 1,294497133  | 0,330316207 |  |
| 1569472_s_at | TTC3 /// TTC3P1 | 1,251994932  | 0,921731975  | 0,330262957 |  |
| 215949_x_at  | IGHM /// LOC100 | 0,228146222  | -0,102100538 | 0,330246759 |  |
| 225758_s_at  | TUBGCP6         | 0,228146222  | -0,102100538 | 0,330246759 |  |
| 220925_at    | NAA35           | 3,24026957   | 2,910041809  | 0,330227762 |  |

|              |                |              |              |             |  |
|--------------|----------------|--------------|--------------|-------------|--|
| 236227_at    | TMEM161B       | 1,021868205  | 0,691645685  | 0,33022252  |  |
| 220800_s_at  | TMOD3          | 0,747935635  | 0,417770464  | 0,330165172 |  |
| 208646_at    | -              | 6,239782398  | 5,90996843   | 0,329813968 |  |
| 1554038_at   | LARP1B         | -1,047650486 | -1,377419394 | 0,329768909 |  |
| 1554374_at   | -              | -1,047650486 | -1,377419394 | 0,329768909 |  |
| 1561425_a_at | ZNF568         | -1,047650486 | -1,377419394 | 0,329768909 |  |
| 202712_s_at  | CKMT1A /// CKM | -1,047650486 | -1,377419394 | 0,329768909 |  |
| 207789_s_at  | DPP6           | -1,047650486 | -1,377419394 | 0,329768909 |  |
| 214844_s_at  | DOK5           | -1,047650486 | -1,377419394 | 0,329768909 |  |
| 214933_at    | CACNA1A        | -1,047650486 | -1,377419394 | 0,329768909 |  |
| 230459_s_at  | SHB            | -1,047650486 | -1,377419394 | 0,329768909 |  |
| 231249_at    | SZT2           | -1,047650486 | -1,377419394 | 0,329768909 |  |
| 231521_at    | PMS2P4         | -1,047650486 | -1,377419394 | 0,329768909 |  |
| 232326_at    | C8orf56        | -1,047650486 | -1,377419394 | 0,329768909 |  |
| 234059_at    | -              | -1,047650486 | -1,377419394 | 0,329768909 |  |
| 235142_at    | ZBTB8A         | -1,047650486 | -1,377419394 | 0,329768909 |  |
| 239416_at    | FBXL6          | -1,047650486 | -1,377419394 | 0,329768909 |  |
| 202460_s_at  | LPIN2          | 1,799091453  | 1,469325098  | 0,329766356 |  |
| 231796_at    | EPHA8          | 0,533835206  | 0,204310755  | 0,329524451 |  |
| 225916_at    | LOC100506639 / | 1,90937145   | 1,579853228  | 0,329518222 |  |
| 227113_at    | ADHFE1         | 0,682279745  | 0,352836757  | 0,329442988 |  |
| 236170_x_at  | -              | 0,682279745  | 0,352836757  | 0,329442988 |  |
| 213341_at    | FEM1C          | 1,954567604  | 1,6252386    | 0,329329004 |  |
| 1554865_at   | -              | -2,667025278 | -2,996335703 | 0,329310425 |  |
| 1557838_at   | FAM135B        | -2,667025278 | -2,996335703 | 0,329310425 |  |
| 1560696_x_at | QTRTD1         | -2,667025278 | -2,996335703 | 0,329310425 |  |
| 1562453_at   | -              | -2,667025278 | -2,996335703 | 0,329310425 |  |
| 1564077_at   | -              | -2,667025278 | -2,996335703 | 0,329310425 |  |
| 1564547_x_at | -              | -2,667025278 | -2,996335703 | 0,329310425 |  |
| 1566161_at   | -              | -2,667025278 | -2,996335703 | 0,329310425 |  |
| 1568646_x_at | ZNF208         | -2,667025278 | -2,996335703 | 0,329310425 |  |
| 1569664_at   | -              | -2,667025278 | -2,996335703 | 0,329310425 |  |
| 205945_at    | IL6R           | -2,667025278 | -2,996335703 | 0,329310425 |  |
| 207772_s_at  | PRMT8          | -2,667025278 | -2,996335703 | 0,329310425 |  |
| 211459_at    | -              | -2,667025278 | -2,996335703 | 0,329310425 |  |
| 217105_at    | -              | -2,667025278 | -2,996335703 | 0,329310425 |  |
| 231879_at    | COL12A1        | -2,667025278 | -2,996335703 | 0,329310425 |  |
| 234957_at    | -              | -2,667025278 | -2,996335703 | 0,329310425 |  |
| 236161_at    | -              | -2,667025278 | -2,996335703 | 0,329310425 |  |
| 243164_s_at  | -              | -2,667025278 | -2,996335703 | 0,329310425 |  |
| 226323_at    | ZNF830         | 2,171078719  | 1,841838775  | 0,329239944 |  |
| 203918_at    | PCDH1          | 0,133056859  | -0,19610998  | 0,329166839 |  |
| 217721_at    | 39326          | 0,133056859  | -0,19610998  | 0,329166839 |  |
| 205550_s_at  | BRE            | 2,752227654  | 2,423075926  | 0,329151728 |  |
| 224697_at    | DCAF5          | 1,233777334  | 0,904843258  | 0,328934075 |  |
| 225032_at    | FNDC3B         | 3,013454777  | 2,684536601  | 0,328918176 |  |
| 206072_at    | UCN            | -0,089689931 | -0,41858459  | 0,328894658 |  |
| 222301_at    | C1orf61        | -0,089689931 | -0,41858459  | 0,328894658 |  |
| 232549_at    | RBM11          | -0,089689931 | -0,41858459  | 0,328894658 |  |
| 244421_at    | -              | -0,089689931 | -0,41858459  | 0,328894658 |  |
| 223078_s_at  | TMOD3          | 1,394109935  | 1,065442793  | 0,328667143 |  |
| 238012_at    | DPP7           | 1,394109935  | 1,065442793  | 0,328667143 |  |
| 1552719_at   | CASC4          | -0,285837228 | -0,614371577 | 0,328534348 |  |
| 1561044_at   | -              | -0,285837228 | -0,614371577 | 0,328534348 |  |
| 211499_s_at  | MAPK11         | -0,285837228 | -0,614371577 | 0,328534348 |  |
| 212562_s_at  | CTSZ           | -0,285837228 | -0,614371577 | 0,328534348 |  |

|              |                 |              |              |             |  |
|--------------|-----------------|--------------|--------------|-------------|--|
| 216448_at    | -               | -0,285837228 | -0,614371577 | 0,328534348 |  |
| 220599_s_at  | CARD14          | -0,285837228 | -0,614371577 | 0,328534348 |  |
| 224122_at    | -               | -0,285837228 | -0,614371577 | 0,328534348 |  |
| 227412_at    | PPP1R3E         | -0,285837228 | -0,614371577 | 0,328534348 |  |
| 228072_at    | SYT12           | -0,285837228 | -0,614371577 | 0,328534348 |  |
| 229207_x_at  | RNF187          | -0,285837228 | -0,614371577 | 0,328534348 |  |
| 229792_at    | KLHL17          | -0,285837228 | -0,614371577 | 0,328534348 |  |
| 201916_s_at  | SEC63           | 4,19991587   | 3,871608557  | 0,328307313 |  |
| 227214_at    | GOPC            | 1,85379461   | 1,525647381  | 0,328147229 |  |
| 1555501_s_at | RSRC1           | 2,854131948  | 2,526063925  | 0,328068024 |  |
| 203676_at    | GNS             | 0,822971223  | 0,495031851  | 0,327939373 |  |
| 213190_at    | COG7            | 0,822971223  | 0,495031851  | 0,327939373 |  |
| 203143_s_at  | KIAA0040        | -0,622910612 | -0,950686014 | 0,327775402 |  |
| 214142_at    | ZG16            | -0,622910612 | -0,950686014 | 0,327775402 |  |
| 218063_s_at  | CDC42EP4        | -0,622910612 | -0,950686014 | 0,327775402 |  |
| 220074_at    | CDHR5           | -0,622910612 | -0,950686014 | 0,327775402 |  |
| 220635_at    | PSORS1C2        | -0,622910612 | -0,950686014 | 0,327775402 |  |
| 224672_x_at  | MESDC2          | -0,622910612 | -0,950686014 | 0,327775402 |  |
| 234626_at    | OR51I1          | -0,622910612 | -0,950686014 | 0,327775402 |  |
| 203448_s_at  | TERF1           | 3,706908684  | 3,379145507  | 0,327763177 |  |
| 221165_s_at  | IL22            | -0,43775896  | -0,765504029 | 0,327745069 |  |
| 234075_at    | -               | -0,43775896  | -0,765504029 | 0,327745069 |  |
| 243631_at    | -               | -0,43775896  | -0,765504029 | 0,327745069 |  |
| 244698_at    | CDRT4 /// FAM18 | -0,43775896  | -0,765504029 | 0,327745069 |  |
| 208249_s_at  | TGDS            | 3,146001821  | 2,81832103   | 0,327680791 |  |
| 211930_at    | HNRNPA3         | 3,146001821  | 2,81832103   | 0,327680791 |  |
| 217087_at    | C1orf68         | 0,917308734  | 0,589657387  | 0,327651347 |  |
| 213041_s_at  | ATP5D           | 4,20284547   | 3,875225653  | 0,327619817 |  |
| 202609_at    | EPS8            | 3,054253462  | 2,726791458  | 0,327462004 |  |
| 214429_at    | MTMR6           | 3,518475927  | 3,191118448  | 0,327357479 |  |
| 203741_s_at  | ADCY7           | 3,115233629  | 2,787940144  | 0,327293485 |  |
| 203647_s_at  | FDX1            | 3,977794563  | 3,650516168  | 0,327278396 |  |
| 208816_x_at  | ANXA2P2         | 4,325653301  | 3,9984201    | 0,327233201 |  |
| 1559879_a_at | -               | -2,908843709 | -3,236070201 | 0,327226492 |  |
| 1570593_at   | -               | -2,908843709 | -3,236070201 | 0,327226492 |  |
| 1557876_at   | LOC340094       | -3,07502285  | -3,402185466 | 0,327162616 |  |
| 1561240_at   | -               | -3,07502285  | -3,402185466 | 0,327162616 |  |
| 1567387_at   | -               | -3,07502285  | -3,402185466 | 0,327162616 |  |
| 240742_at    | -               | 0,760715727  | 0,433557298  | 0,327158429 |  |
| 1562305_x_at | ZKSCAN3         | -0,022466681 | -0,34958478  | 0,3271181   |  |
| 213569_at    | LOC100506603    | -0,022466681 | -0,34958478  | 0,3271181   |  |
| 230926_s_at  | ODF2L           | -0,022466681 | -0,34958478  | 0,3271181   |  |
| 233443_at    | PSMG4           | -0,022466681 | -0,34958478  | 0,3271181   |  |
| 217640_x_at  | SKA1            | 2,277177578  | 1,950068772  | 0,327108806 |  |
| 214009_at    | MSL3            | 1,063722698  | 0,73688026   | 0,326842437 |  |
| 206712_at    | GRTP1           | -0,352951799 | -0,679763839 | 0,326812041 |  |
| 226761_at    | IKZF4           | -0,352951799 | -0,679763839 | 0,326812041 |  |
| 239389_at    | TARBP2          | -0,352951799 | -0,679763839 | 0,326812041 |  |
| 218522_s_at  | MAP1S           | 1,143956113  | 0,817300337  | 0,326655776 |  |
| 226754_at    | ZNF251          | 1,143956113  | 0,817300337  | 0,326655776 |  |
| 1564063_a_at | ATP11B          | 1,314003737  | 0,987376598  | 0,326627139 |  |
| 227785_at    | SDCCAG8         | 1,314003737  | 0,987376598  | 0,326627139 |  |
| 226472_at    | PPIL4           | 3,565667132  | 3,239069096  | 0,326598036 |  |
| 228045_at    | -               | 1,58584542   | 1,259496994  | 0,326348426 |  |
| 225105_at    | C12orf75        | 4,848036436  | 4,52176814   | 0,326268296 |  |
| 201559_s_at  | CLIC4           | 1,326951551  | 1,000684521  | 0,32626703  |  |



|              |                 |              |              |             |  |
|--------------|-----------------|--------------|--------------|-------------|--|
| 212200_at    | ANKLE2          | 1,814495998  | 1,488344553  | 0,326151446 |  |
| 225773_at    | RSPRY1          | 3,159334685  | 2,833274877  | 0,326059808 |  |
| 213431_x_at  | SFI1            | 1,094335495  | 0,768343791  | 0,325991704 |  |
| 224497_x_at  | HSD17B14        | 0,246434561  | -0,079522948 | 0,325957509 |  |
| 206745_at    | HOXC11          | 0,984222186  | 0,658444279  | 0,325777906 |  |
| 213907_at    | EEF1E1          | 2,758612869  | 2,432926755  | 0,325686114 |  |
| 213256_at    | 03.03.15        | 3,612245157  | 3,28656411   | 0,325681047 |  |
| 241972_at    | LOC401588       | 1,880387527  | 1,55481039   | 0,325577137 |  |
| 1553956_at   | TMEM237         | 2,396622324  | 2,071071048  | 0,325551276 |  |
| 1558793_at   | FRY-AS1         | -2,712026959 | -3,037500868 | 0,325473909 |  |
| 1558972_s_at | THEMIS          | -2,712026959 | -3,037500868 | 0,325473909 |  |
| 1559590_at   | CHDH            | -2,712026959 | -3,037500868 | 0,325473909 |  |
| 1562307_at   | -               | -2,712026959 | -3,037500868 | 0,325473909 |  |
| 1563486_at   | -               | -2,712026959 | -3,037500868 | 0,325473909 |  |
| 1564758_at   | LOC643659       | -2,712026959 | -3,037500868 | 0,325473909 |  |
| 1566202_at   | -               | -2,712026959 | -3,037500868 | 0,325473909 |  |
| 205337_at    | DCT             | -2,712026959 | -3,037500868 | 0,325473909 |  |
| 228885_at    | MAMDC2          | -2,712026959 | -3,037500868 | 0,325473909 |  |
| 233636_at    | MIR17HG         | -2,712026959 | -3,037500868 | 0,325473909 |  |
| 234108_at    | TAS2R45         | -2,712026959 | -3,037500868 | 0,325473909 |  |
| 236339_at    | PPM1L           | -2,712026959 | -3,037500868 | 0,325473909 |  |
| 239477_at    | EFHB            | -2,712026959 | -3,037500868 | 0,325473909 |  |
| 240771_at    | C1orf101        | -2,712026959 | -3,037500868 | 0,325473909 |  |
| 242880_at    | NALCN           | -2,712026959 | -3,037500868 | 0,325473909 |  |
| 217322_x_at  | -               | 2,768138014  | 2,442710777  | 0,325427237 |  |
| 206698_at    | XK              | 5,08686793   | 4,761478085  | 0,325389845 |  |
| 214001_x_at  | -               | 2,646022818  | 2,320681318  | 0,3253415   |  |
| 215644_at    | LOC100509474 /  | -0,136301282 | -0,461594427 | 0,325293144 |  |
| 217637_at    | -               | -0,136301282 | -0,461594427 | 0,325293144 |  |
| 232320_at    | LOC100509205    | -0,136301282 | -0,461594427 | 0,325293144 |  |
| 235890_at    | TBL1XR1         | -0,136301282 | -0,461594427 | 0,325293144 |  |
| 241667_x_at  | -               | -0,136301282 | -0,461594427 | 0,325293144 |  |
| 221007_s_at  | FIP1L1          | 2,691784869  | 2,366632651  | 0,325152218 |  |
| 235203_at    | -               | 1,493160564  | 1,16809119   | 0,325069374 |  |
| 207824_s_at  | MAZ             | 1,274448124  | 0,949447784  | 0,32500034  |  |
| 201862_s_at  | LRRFIP1         | 3,498586477  | 3,173599504  | 0,324986974 |  |
| 1552627_a_at | ARHGAP5         | 0,592200562  | 0,26733076   | 0,324869802 |  |
| 209574_s_at  | C18orf1         | 0,592200562  | 0,26733076   | 0,324869802 |  |
| 214782_at    | CTTN            | 0,592200562  | 0,26733076   | 0,324869802 |  |
| 204632_at    | RPS6KA4         | 2,344516784  | 2,019703483  | 0,324813301 |  |
| 201421_s_at  | WDR77           | 2,845159691  | 2,520531219  | 0,324628472 |  |
| 226732_at    | RBM33           | 3,716780201  | 3,392332256  | 0,324447946 |  |
| 223268_at    | C11orf54        | 2,166283906  | 1,841838775  | 0,324445131 |  |
| 229270_x_at  | SSBP4           | 0,962260738  | 0,638150376  | 0,324110362 |  |
| 222088_s_at  | SLC2A14 /// SLC | 5,219497001  | 4,895396095  | 0,324100906 |  |
| 231840_x_at  | LYRM7           | 2,218170265  | 1,894118818  | 0,324051447 |  |
| 202886_s_at  | PPP2R1B         | 2,254767157  | 1,930732138  | 0,32403502  |  |
| 218622_at    | NUP37           | 4,975475611  | 4,651455664  | 0,324019947 |  |
| 230264_s_at  | AP1S2           | 6,919202954  | 6,595288643  | 0,323914311 |  |
| 214869_x_at  | GAPVD1          | 2,577249059  | 2,253342112  | 0,323906946 |  |
| 34210_at     | CD52            | -0,339265673 | -0,663160505 | 0,323894832 |  |
| 1554961_at   | FGFR4           | 0,103263601  | -0,220592223 | 0,323855825 |  |
| 1556769_a_at | -               | 0,103263601  | -0,220592223 | 0,323855825 |  |
| 1559054_a_at | -               | 0,103263601  | -0,220592223 | 0,323855825 |  |
| 206743_s_at  | ASGR1           | 0,103263601  | -0,220592223 | 0,323855825 |  |
| 226800_at    | EFCAB7          | 0,103263601  | -0,220592223 | 0,323855825 |  |

|              |                  |              |              |             |  |
|--------------|------------------|--------------|--------------|-------------|--|
| 228391_at    | CYP4V2           | 0,103263601  | -0,220592223 | 0,323855825 |  |
| 230946_at    | FMN2             | 0,103263601  | -0,220592223 | 0,323855825 |  |
| 234355_s_at  | PTCHD2           | 0,103263601  | -0,220592223 | 0,323855825 |  |
| 236812_at    | STMN4            | 0,103263601  | -0,220592223 | 0,323855825 |  |
| 236965_at    | UBQLNL           | 0,103263601  | -0,220592223 | 0,323855825 |  |
| 1555516_at   | FOXP2            | -1,838812296 | -2,162639771 | 0,323827475 |  |
| 1559987_at   | -                | -1,838812296 | -2,162639771 | 0,323827475 |  |
| 1562934_at   | -                | -1,838812296 | -2,162639771 | 0,323827475 |  |
| 1566176_at   | -                | -1,838812296 | -2,162639771 | 0,323827475 |  |
| 203528_at    | SEMA4D           | -1,838812296 | -2,162639771 | 0,323827475 |  |
| 203873_at    | SMARCA1          | -1,838812296 | -2,162639771 | 0,323827475 |  |
| 215538_at    | LARGE            | -1,838812296 | -2,162639771 | 0,323827475 |  |
| 217082_at    | -                | -1,838812296 | -2,162639771 | 0,323827475 |  |
| 222954_at    | FBXO40           | -1,838812296 | -2,162639771 | 0,323827475 |  |
| 227735_s_at  | C10orf99         | -1,838812296 | -2,162639771 | 0,323827475 |  |
| 229072_at    | RAB30            | -1,838812296 | -2,162639771 | 0,323827475 |  |
| 230794_at    | PELI2            | -1,838812296 | -2,162639771 | 0,323827475 |  |
| 233190_at    | -                | -1,838812296 | -2,162639771 | 0,323827475 |  |
| 233420_at    | -                | -1,838812296 | -2,162639771 | 0,323827475 |  |
| 239326_at    | -                | -1,838812296 | -2,162639771 | 0,323827475 |  |
| 239570_at    | RAB1A            | -1,838812296 | -2,162639771 | 0,323827475 |  |
| 243932_at    | -                | -1,838812296 | -2,162639771 | 0,323827475 |  |
| 1552414_at   | WFDC9            | -1,763254337 | -2,086984744 | 0,323730407 |  |
| 1553314_a_at | KIF19            | -1,763254337 | -2,086984744 | 0,323730407 |  |
| 1553630_at   | C10orf107        | -1,763254337 | -2,086984744 | 0,323730407 |  |
| 1554277_s_at | FANCM            | -1,763254337 | -2,086984744 | 0,323730407 |  |
| 1557346_a_at | C17orf51 /// FAM | -1,763254337 | -2,086984744 | 0,323730407 |  |
| 1558281_a_at | TMEM184A         | -1,763254337 | -2,086984744 | 0,323730407 |  |
| 1560486_at   | STXBP3           | -1,763254337 | -2,086984744 | 0,323730407 |  |
| 1560520_at   | LOC401312        | -1,763254337 | -2,086984744 | 0,323730407 |  |
| 1563472_at   | -                | -1,763254337 | -2,086984744 | 0,323730407 |  |
| 1563854_s_at | LOC283045        | -1,763254337 | -2,086984744 | 0,323730407 |  |
| 1564423_a_at | SEC16B           | -1,763254337 | -2,086984744 | 0,323730407 |  |
| 1569320_at   | GPBP1L1          | -1,763254337 | -2,086984744 | 0,323730407 |  |
| 203900_at    | SZT2             | -1,763254337 | -2,086984744 | 0,323730407 |  |
| 204390_at    | -                | -1,763254337 | -2,086984744 | 0,323730407 |  |
| 211571_s_at  | VCAN             | -1,763254337 | -2,086984744 | 0,323730407 |  |
| 220916_at    | -                | -1,763254337 | -2,086984744 | 0,323730407 |  |
| 220958_at    | ULK4             | -1,763254337 | -2,086984744 | 0,323730407 |  |
| 227272_at    | C15orf52         | -1,763254337 | -2,086984744 | 0,323730407 |  |
| 228153_at    | RNF144B          | -1,763254337 | -2,086984744 | 0,323730407 |  |
| 234595_at    | CATX-1           | -1,763254337 | -2,086984744 | 0,323730407 |  |
| 237245_at    | -                | -1,763254337 | -2,086984744 | 0,323730407 |  |
| 239113_at    | LOC100507468     | -1,763254337 | -2,086984744 | 0,323730407 |  |
| 240541_at    | -                | -1,763254337 | -2,086984744 | 0,323730407 |  |
| 240725_at    | -                | -1,763254337 | -2,086984744 | 0,323730407 |  |
| 241418_at    | LOC344887        | -1,763254337 | -2,086984744 | 0,323730407 |  |
| 241884_at    | -                | -1,763254337 | -2,086984744 | 0,323730407 |  |
| 242234_at    | XAF1             | -1,763254337 | -2,086984744 | 0,323730407 |  |
| 230873_at    | ARPC4-TTLL3 ///  | 0,841135803  | 0,51742585   | 0,323709953 |  |
| 1552623_at   | HSH2D            | -1,888254346 | -2,211750327 | 0,323495982 |  |
| 1554062_at   | XG               | -1,888254346 | -2,211750327 | 0,323495982 |  |
| 1554736_at   | ARHGAP29         | -1,888254346 | -2,211750327 | 0,323495982 |  |
| 1558532_at   | TPM1             | -1,888254346 | -2,211750327 | 0,323495982 |  |
| 1560559_at   | -                | -1,888254346 | -2,211750327 | 0,323495982 |  |
| 1561846_s_at | CCDC168          | -1,888254346 | -2,211750327 | 0,323495982 |  |

|              |                 |              |              |             |  |
|--------------|-----------------|--------------|--------------|-------------|--|
| 208162_s_at  | -               | -1,888254346 | -2,211750327 | 0,323495982 |  |
| 211102_s_at  | LILRA2          | -1,888254346 | -2,211750327 | 0,323495982 |  |
| 213411_at    | ADAM22          | -1,888254346 | -2,211750327 | 0,323495982 |  |
| 219676_at    | ZSCAN16         | -1,888254346 | -2,211750327 | 0,323495982 |  |
| 230589_at    | TRAF3IP2-AS1    | -1,888254346 | -2,211750327 | 0,323495982 |  |
| 230744_at    | FSTL1           | -1,888254346 | -2,211750327 | 0,323495982 |  |
| 231365_at    | HOXA-AS4 /// MI | -1,888254346 | -2,211750327 | 0,323495982 |  |
| 234354_x_at  | ERBB2           | -1,888254346 | -2,211750327 | 0,323495982 |  |
| 235962_at    | AZI2            | -1,888254346 | -2,211750327 | 0,323495982 |  |
| 236071_at    | LOC494558       | -1,888254346 | -2,211750327 | 0,323495982 |  |
| 238101_at    | BEND4           | -1,888254346 | -2,211750327 | 0,323495982 |  |
| 238991_at    | ASB1            | -1,888254346 | -2,211750327 | 0,323495982 |  |
| 240504_at    | -               | -1,888254346 | -2,211750327 | 0,323495982 |  |
| 240639_at    | ARMC9           | -1,888254346 | -2,211750327 | 0,323495982 |  |
| 241608_at    | -               | -1,888254346 | -2,211750327 | 0,323495982 |  |
| 241810_at    | LOC100131180    | -1,888254346 | -2,211750327 | 0,323495982 |  |
| 209259_s_at  | SMC3            | 4,036776538  | 3,713295978  | 0,32348056  |  |
| 210705_s_at  | TRIM5           | 2,281618189  | 1,958277216  | 0,323340973 |  |
| 1564736_a_at | CASP12          | -1,71423189  | -2,037551727 | 0,323319837 |  |
| 1565867_a_at | ZC3H11A         | -1,71423189  | -2,037551727 | 0,323319837 |  |
| 1566181_at   | -               | -1,71423189  | -2,037551727 | 0,323319837 |  |
| 1568908_at   | -               | -1,71423189  | -2,037551727 | 0,323319837 |  |
| 206099_at    | PRKCH           | -1,71423189  | -2,037551727 | 0,323319837 |  |
| 208606_s_at  | WNT4            | -1,71423189  | -2,037551727 | 0,323319837 |  |
| 211856_x_at  | CD28            | -1,71423189  | -2,037551727 | 0,323319837 |  |
| 216166_at    | -               | -1,71423189  | -2,037551727 | 0,323319837 |  |
| 219393_s_at  | AKT3            | -1,71423189  | -2,037551727 | 0,323319837 |  |
| 232072_at    | -               | -1,71423189  | -2,037551727 | 0,323319837 |  |
| 240269_at    | -               | -1,71423189  | -2,037551727 | 0,323319837 |  |
| 241940_at    | -               | -1,71423189  | -2,037551727 | 0,323319837 |  |
| 243168_at    | -               | -1,71423189  | -2,037551727 | 0,323319837 |  |
| 201581_at    | TMX4            | 2,987866617  | 2,664608955  | 0,323257662 |  |
| 202336_s_at  | PAM             | 4,587453139  | 4,264240901  | 0,323212239 |  |
| 1557777_at   | PDE6B           | 0,480753764  | 0,157549243  | 0,323204521 |  |
| 205013_s_at  | ADORA2A         | 0,480753764  | 0,157549243  | 0,323204521 |  |
| 215909_x_at  | MINK1           | 0,351548291  | 0,028364014  | 0,323184277 |  |
| 240656_at    | -               | 0,351548291  | 0,028364014  | 0,323184277 |  |
| 221708_s_at  | UNC45A          | 2,11992033   | 1,796776588  | 0,323143742 |  |
| 1555539_at   | SDS             | -0,83191556  | -1,154897679 | 0,322982119 |  |
| 1560153_at   | FRAS1           | -0,83191556  | -1,154897679 | 0,322982119 |  |
| 1560966_at   | -               | -0,83191556  | -1,154897679 | 0,322982119 |  |
| 207414_s_at  | LOC100507472 /  | -0,83191556  | -1,154897679 | 0,322982119 |  |
| 220014_at    | PRR16           | -0,83191556  | -1,154897679 | 0,322982119 |  |
| 221129_at    | FAM215A         | -0,83191556  | -1,154897679 | 0,322982119 |  |
| 229282_at    | GATA6           | -0,83191556  | -1,154897679 | 0,322982119 |  |
| 232360_at    | EHF             | -0,83191556  | -1,154897679 | 0,322982119 |  |
| 235916_at    | YPEL4           | -0,83191556  | -1,154897679 | 0,322982119 |  |
| 238779_at    | DCP2            | -0,83191556  | -1,154897679 | 0,322982119 |  |
| 241702_at    | -               | -0,83191556  | -1,154897679 | 0,322982119 |  |
| 225026_at    | CHD6            | 1,283332461  | 0,960386719  | 0,322945741 |  |
| 239138_at    | NAA50           | 0,779676066  | 0,456918297  | 0,322757768 |  |
| 229538_s_at  | IQGAP3          | 0,67554678   | 0,352836757  | 0,322710023 |  |
| 218065_s_at  | TMEM9B          | 3,513765154  | 3,191118448  | 0,322646707 |  |
| 1567458_s_at | RAC1            | 4,657889997  | 4,335292864  | 0,322597134 |  |
| 228324_at    | C9orf41         | 3,302773593  | 2,980244813  | 0,322528781 |  |
| 224663_s_at  | CFL2            | 1,954567604  | 1,632095957  | 0,322471647 |  |

|              |                 |              |              |             |  |
|--------------|-----------------|--------------|--------------|-------------|--|
| 1552970_s_at | ZMYM6           | -1,964176657 | -2,286583451 | 0,322406794 |  |
| 1553521_at   | DEFB104A /// DE | -1,964176657 | -2,286583451 | 0,322406794 |  |
| 1556117_at   | LOC79015        | -1,964176657 | -2,286583451 | 0,322406794 |  |
| 1557543_at   | -               | -1,964176657 | -2,286583451 | 0,322406794 |  |
| 1561114_a_at | DEPDC4          | -1,964176657 | -2,286583451 | 0,322406794 |  |
| 1569450_at   | CAPZA2          | -1,964176657 | -2,286583451 | 0,322406794 |  |
| 202917_s_at  | S100A8          | -1,964176657 | -2,286583451 | 0,322406794 |  |
| 215106_at    | TTC22           | -1,964176657 | -2,286583451 | 0,322406794 |  |
| 228193_s_at  | RGCC            | -1,964176657 | -2,286583451 | 0,322406794 |  |
| 229868_s_at  | LOC100653010    | -1,964176657 | -2,286583451 | 0,322406794 |  |
| 230473_s_at  | HMGB4           | -1,964176657 | -2,286583451 | 0,322406794 |  |
| 230890_at    | LOC100506821    | -1,964176657 | -2,286583451 | 0,322406794 |  |
| 232943_at    | -               | -1,964176657 | -2,286583451 | 0,322406794 |  |
| 233106_at    | FRMD6-AS1       | -1,964176657 | -2,286583451 | 0,322406794 |  |
| 233903_s_at  | ARHGEF26        | -1,964176657 | -2,286583451 | 0,322406794 |  |
| 239456_at    | -               | -1,964176657 | -2,286583451 | 0,322406794 |  |
| 239502_at    | -               | -1,964176657 | -2,286583451 | 0,322406794 |  |
| 240078_at    | SFSWAP          | -1,964176657 | -2,286583451 | 0,322406794 |  |
| 241011_at    | -               | -1,964176657 | -2,286583451 | 0,322406794 |  |
| 222613_at    | C12orf4         | 3,069741844  | 2,747463672  | 0,322278172 |  |
| 233329_s_at  | KRCC1           | 1,659347917  | 1,337086025  | 0,322261892 |  |
| 1555819_s_at | SAMD14          | -0,496991414 | -0,819238336 | 0,322246922 |  |
| 1558331_at   | SIRT2           | -0,496991414 | -0,819238336 | 0,322246922 |  |
| 203472_s_at  | SLCO2B1         | -0,496991414 | -0,819238336 | 0,322246922 |  |
| 204376_at    | VPRBP           | -0,496991414 | -0,819238336 | 0,322246922 |  |
| 217114_at    | SNRNP200        | -0,496991414 | -0,819238336 | 0,322246922 |  |
| 230758_at    | GEMIN8          | -0,496991414 | -0,819238336 | 0,322246922 |  |
| 233176_at    | LOC100507642    | -0,496991414 | -0,819238336 | 0,322246922 |  |
| 237693_at    | -               | -0,496991414 | -0,819238336 | 0,322246922 |  |
| 239168_at    | LOC100652811 /  | -0,496991414 | -0,819238336 | 0,322246922 |  |
| 224698_at    | ESYT2           | 3,21379258   | 2,891586849  | 0,322205731 |  |
| 206758_at    | EDN2            | -0,00073712  | -0,322870281 | 0,322133161 |  |
| 212554_at    | CAP2            | -0,00073712  | -0,322870281 | 0,322133161 |  |
| 212366_at    | ZNF292          | 2,238870125  | 1,916759838  | 0,322110287 |  |
| 205202_at    | PCMT1           | 5,503745873  | 5,181707664  | 0,322038208 |  |
| 1556636_at   | -               | -1,639579028 | -1,961547147 | 0,321968119 |  |
| 1560225_at   | CNR1            | -1,639579028 | -1,961547147 | 0,321968119 |  |
| 1561491_at   | LOC283214       | -1,639579028 | -1,961547147 | 0,321968119 |  |
| 1564044_at   | KNCN            | -1,639579028 | -1,961547147 | 0,321968119 |  |
| 1568661_at   | -               | -1,639579028 | -1,961547147 | 0,321968119 |  |
| 206389_s_at  | PDE3A           | -1,639579028 | -1,961547147 | 0,321968119 |  |
| 207691_x_at  | ENTPD1          | -1,639579028 | -1,961547147 | 0,321968119 |  |
| 215302_at    | LOC257152       | -1,639579028 | -1,961547147 | 0,321968119 |  |
| 216168_at    | -               | -1,639579028 | -1,961547147 | 0,321968119 |  |
| 219667_s_at  | BANK1           | -1,639579028 | -1,961547147 | 0,321968119 |  |
| 230796_at    | LOC440900       | -1,639579028 | -1,961547147 | 0,321968119 |  |
| 233078_at    | API5            | -1,639579028 | -1,961547147 | 0,321968119 |  |
| 234250_at    | LOC100506405    | -1,639579028 | -1,961547147 | 0,321968119 |  |
| 234790_at    | -               | -1,639579028 | -1,961547147 | 0,321968119 |  |
| 240678_at    | -               | -1,639579028 | -1,961547147 | 0,321968119 |  |
| 244754_at    | -               | -1,639579028 | -1,961547147 | 0,321968119 |  |
| 1553192_at   | ZNF441          | 0,401366113  | 0,079428135  | 0,321937978 |  |
| 225979_at    | PLEKHG2         | 0,911589958  | 0,589657387  | 0,321932571 |  |
| 225202_at    | RHOBTB3         | 5,891396388  | 5,569485024  | 0,321911365 |  |
| 208875_s_at  | PAK2            | 2,833109217  | 2,511262629  | 0,321846588 |  |
| 223554_s_at  | RANGRF          | 1,46610492   | 1,144305291  | 0,321799629 |  |

|              |                 |              |              |             |  |
|--------------|-----------------|--------------|--------------|-------------|--|
| 1554705_at   | SCARA5          | -0,59053611  | -0,912331589 | 0,321795478 |  |
| 206586_at    | CNR2            | -0,59053611  | -0,912331589 | 0,321795478 |  |
| 210843_s_at  | MFAP3L          | -0,59053611  | -0,912331589 | 0,321795478 |  |
| 215439_x_at  | -               | -0,59053611  | -0,912331589 | 0,321795478 |  |
| 226904_at    | SLC6A10P /// SL | -0,59053611  | -0,912331589 | 0,321795478 |  |
| 230971_x_at  | GLTPD2          | -0,59053611  | -0,912331589 | 0,321795478 |  |
| 244605_at    | -               | -0,59053611  | -0,912331589 | 0,321795478 |  |
| 213547_at    | CAND2           | 1,40228911   | 1,080561626  | 0,321727484 |  |
| 226615_at    | XPR1            | 0,715481152  | 0,393761504  | 0,321719647 |  |
| 229285_at    | RNASEL          | 0,715481152  | 0,393761504  | 0,321719647 |  |
| 1552990_at   | FAM71E2         | -2,01371626  | -2,335104118 | 0,321387858 |  |
| 1553514_a_at | VNN3            | -2,01371626  | -2,335104118 | 0,321387858 |  |
| 1555807_a_at | MOG             | -2,01371626  | -2,335104118 | 0,321387858 |  |
| 1558777_at   | MKL2            | -2,01371626  | -2,335104118 | 0,321387858 |  |
| 1559347_at   | -               | -2,01371626  | -2,335104118 | 0,321387858 |  |
| 1563038_at   | -               | -2,01371626  | -2,335104118 | 0,321387858 |  |
| 1563466_at   | MYLK            | -2,01371626  | -2,335104118 | 0,321387858 |  |
| 1566098_at   | -               | -2,01371626  | -2,335104118 | 0,321387858 |  |
| 1566585_at   | -               | -2,01371626  | -2,335104118 | 0,321387858 |  |
| 1569322_at   | LOC439990       | -2,01371626  | -2,335104118 | 0,321387858 |  |
| 1569990_at   | NUDT3           | -2,01371626  | -2,335104118 | 0,321387858 |  |
| 202986_at    | ARNT2           | -2,01371626  | -2,335104118 | 0,321387858 |  |
| 207174_at    | GPC5            | -2,01371626  | -2,335104118 | 0,321387858 |  |
| 216003_at    | -               | -2,01371626  | -2,335104118 | 0,321387858 |  |
| 216753_at    | -               | -2,01371626  | -2,335104118 | 0,321387858 |  |
| 222255_at    | PRX             | -2,01371626  | -2,335104118 | 0,321387858 |  |
| 235100_at    | -               | -2,01371626  | -2,335104118 | 0,321387858 |  |
| 237526_at    | -               | -2,01371626  | -2,335104118 | 0,321387858 |  |
| 237534_at    | -               | -2,01371626  | -2,335104118 | 0,321387858 |  |
| 239253_at    | -               | -2,01371626  | -2,335104118 | 0,321387858 |  |
| 242797_x_at  | -               | -2,01371626  | -2,335104118 | 0,321387858 |  |
| 211406_at    | IER3IP1         | 1,751865623  | 1,43051703   | 0,321348592 |  |
| 202458_at    | PRSS23          | 4,777867415  | 4,456625687  | 0,321241728 |  |
| 201992_s_at  | KIF5B           | 2,314494121  | 1,993317152  | 0,321176968 |  |
| 234733_s_at  | FANCM           | 2,314494121  | 1,993317152  | 0,321176968 |  |
| 1773_at      | CHURC1-FNTB /   | 1,206012206  | 0,884886581  | 0,321125626 |  |
| 209187_at    | DR1             | 4,399525568  | 4,078419261  | 0,321106307 |  |
| 215287_at    | STRN            | -0,325749314 | -0,646746079 | 0,320996765 |  |
| 226002_at    | GAB1            | -0,325749314 | -0,646746079 | 0,320996765 |  |
| 227773_at    | SAMD10          | -0,325749314 | -0,646746079 | 0,320996765 |  |
| 234216_at    | FLJ21408        | -0,325749314 | -0,646746079 | 0,320996765 |  |
| 234239_at    | -               | -0,325749314 | -0,646746079 | 0,320996765 |  |
| 240473_at    | -               | -0,325749314 | -0,646746079 | 0,320996765 |  |
| 213712_at    | ELOVL2          | 0,853119696  | 0,532164371  | 0,320955325 |  |
| 227094_at    | DHTKD1          | 0,853119696  | 0,532164371  | 0,320955325 |  |
| 1553801_a_at | C14orf126       | 1,089278259  | 0,768343791  | 0,320934469 |  |
| 1564552_at   | -               | -1,173767127 | -1,494668682 | 0,320901555 |  |
| 207561_s_at  | ABCB8 /// ASIC3 | -1,173767127 | -1,494668682 | 0,320901555 |  |
| 216130_at    | -               | -1,173767127 | -1,494668682 | 0,320901555 |  |
| 217567_at    | TGM4            | -1,173767127 | -1,494668682 | 0,320901555 |  |
| 220524_at    | EPB41L4B        | -1,173767127 | -1,494668682 | 0,320901555 |  |
| 220756_s_at  | SLC52A1         | -1,173767127 | -1,494668682 | 0,320901555 |  |
| 220963_s_at  | RSG1            | -1,173767127 | -1,494668682 | 0,320901555 |  |
| 221367_at    | MOS             | -1,173767127 | -1,494668682 | 0,320901555 |  |
| 221631_at    | CACNA1I         | -1,173767127 | -1,494668682 | 0,320901555 |  |
| 225942_at    | NLN             | -1,173767127 | -1,494668682 | 0,320901555 |  |

|              |                 |              |              |             |  |
|--------------|-----------------|--------------|--------------|-------------|--|
| 229014_at    | FLJ42709        | -1,173767127 | -1,494668682 | 0,320901555 |  |
| 229148_at    | -               | -1,173767127 | -1,494668682 | 0,320901555 |  |
| 231009_at    | PLA2G12B        | -1,173767127 | -1,494668682 | 0,320901555 |  |
| 233725_at    | -               | -1,173767127 | -1,494668682 | 0,320901555 |  |
| 234705_at    | CATX-1          | -1,173767127 | -1,494668682 | 0,320901555 |  |
| 236221_at    | AP4B1           | -1,173767127 | -1,494668682 | 0,320901555 |  |
| 241141_at    | BMP6            | -1,173767127 | -1,494668682 | 0,320901555 |  |
| 1552629_a_at | JMJD6           | -1,591296941 | -1,912089812 | 0,32079287  |  |
| 1553188_s_at | PAR3B           | -1,591296941 | -1,912089812 | 0,32079287  |  |
| 1556456_at   | FLJ39739        | -1,591296941 | -1,912089812 | 0,32079287  |  |
| 1559605_a_at | LOC285043       | -1,591296941 | -1,912089812 | 0,32079287  |  |
| 1559971_at   | BSDC1           | -1,591296941 | -1,912089812 | 0,32079287  |  |
| 1562454_at   | -               | -1,591296941 | -1,912089812 | 0,32079287  |  |
| 205852_at    | CDK5R2          | -1,591296941 | -1,912089812 | 0,32079287  |  |
| 208323_s_at  | ANXA13          | -1,591296941 | -1,912089812 | 0,32079287  |  |
| 210015_s_at  | MAP2            | -1,591296941 | -1,912089812 | 0,32079287  |  |
| 210603_at    | NAA11           | -1,591296941 | -1,912089812 | 0,32079287  |  |
| 211377_x_at  | MYCN            | -1,591296941 | -1,912089812 | 0,32079287  |  |
| 212336_at    | EPB41L1         | -1,591296941 | -1,912089812 | 0,32079287  |  |
| 221884_at    | MECOM           | -1,591296941 | -1,912089812 | 0,32079287  |  |
| 223557_s_at  | TMEFF2          | -1,591296941 | -1,912089812 | 0,32079287  |  |
| 223678_s_at  | SFTPA1 /// SFTP | -1,591296941 | -1,912089812 | 0,32079287  |  |
| 225250_at    | STIM2           | -1,591296941 | -1,912089812 | 0,32079287  |  |
| 228329_at    | DAB1            | -1,591296941 | -1,912089812 | 0,32079287  |  |
| 228803_at    | PMS1            | -1,591296941 | -1,912089812 | 0,32079287  |  |
| 234533_at    | BCL2L14         | -1,591296941 | -1,912089812 | 0,32079287  |  |
| 235571_at    | -               | -1,591296941 | -1,912089812 | 0,32079287  |  |
| 236809_at    | -               | -1,591296941 | -1,912089812 | 0,32079287  |  |
| 237076_at    | NCSTN           | -1,591296941 | -1,912089812 | 0,32079287  |  |
| 240123_at    | -               | -1,591296941 | -1,912089812 | 0,32079287  |  |
| 240411_at    | HEATR7B2        | -1,591296941 | -1,912089812 | 0,32079287  |  |
| 243592_at    | REV1            | -1,591296941 | -1,912089812 | 0,32079287  |  |
| 244578_at    | LCP2            | -1,591296941 | -1,912089812 | 0,32079287  |  |
| 201513_at    | TSN             | 2,156646206  | 1,835911187  | 0,320735019 |  |
| 1568955_at   | SRGAP2 /// SRG  | 1,512180019  | 1,191491281  | 0,320688738 |  |
| 207724_s_at  | SPAST           | 1,512180019  | 1,191491281  | 0,320688738 |  |
| 226650_at    | ZFAND2A         | 3,28739962   | 2,966746113  | 0,320653507 |  |
| 217800_s_at  | NDFIP1          | 4,06796029   | 3,747642277  | 0,320318014 |  |
| 213858_at    | ZNF250          | 1,534677255  | 1,214517879  | 0,320159376 |  |
| 203574_at    | NFIL3           | 0,888485433  | 0,568365095  | 0,320120338 |  |
| 215809_at    | CYP2D6          | 0,888485433  | 0,568365095  | 0,320120338 |  |
| 229143_at    | CNOT3           | 0,888485433  | 0,568365095  | 0,320120338 |  |
| 239038_at    | C1orf52         | 0,888485433  | 0,568365095  | 0,320120338 |  |
| 236249_at    | IKBIP           | 1,473887017  | 1,153866761  | 0,320020256 |  |
| 201515_s_at  | TSN             | 4,839402629  | 4,519458551  | 0,319944077 |  |
| 204330_s_at  | MRPS12          | 2,808702036  | 2,488772006  | 0,31993003  |  |
| 218426_s_at  | RNF216          | 1,614289682  | 1,294497133  | 0,319792549 |  |
| 219707_at    | CPNE7           | 0,273439642  | -0,046302147 | 0,319741789 |  |
| 220236_at    | PDPR            | 0,273439642  | -0,046302147 | 0,319741789 |  |
| 202842_s_at  | DNAJB9          | 2,817903185  | 2,498185745  | 0,31971744  |  |
| 220212_s_at  | THADA           | 2,344516784  | 2,024923328  | 0,319593456 |  |
| 218743_at    | CHMP6           | 1,011212064  | 0,691645685  | 0,319566379 |  |
| 221665_s_at  | EPS8L1          | 1,011212064  | 0,691645685  | 0,319566379 |  |
| 218538_s_at  | MRS2            | 3,439206878  | 3,119728903  | 0,319477975 |  |
| 1555141_a_at | SLC9B1          | -2,779459409 | -3,098858316 | 0,319398908 |  |
| 1564635_a_at | FHAD1           | -2,779459409 | -3,098858316 | 0,319398908 |  |

|              |                 |              |              |             |  |
|--------------|-----------------|--------------|--------------|-------------|--|
| 1564685_a_at | -               | -2,779459409 | -3,098858316 | 0,319398908 |  |
| 217126_at    | -               | -2,779459409 | -3,098858316 | 0,319398908 |  |
| 220759_at    | EDDM3B          | -2,779459409 | -3,098858316 | 0,319398908 |  |
| 220850_at    | MORC1           | -2,779459409 | -3,098858316 | 0,319398908 |  |
| 222259_s_at  | SPO11           | -2,779459409 | -3,098858316 | 0,319398908 |  |
| 241642_x_at  | TLK1            | -2,779459409 | -3,098858316 | 0,319398908 |  |
| 203465_at    | MRPL19          | 3,512821151  | 3,193438316  | 0,319382836 |  |
| 1554524_a_at | OLFM3           | -1,543331864 | -1,862647763 | 0,319315898 |  |
| 1559568_at   | -               | -1,543331864 | -1,862647763 | 0,319315898 |  |
| 1560812_at   | -               | -1,543331864 | -1,862647763 | 0,319315898 |  |
| 1563157_at   | -               | -1,543331864 | -1,862647763 | 0,319315898 |  |
| 1565495_at   | CYAT1 /// IGLC1 | -1,543331864 | -1,862647763 | 0,319315898 |  |
| 1569637_at   | ZNF736          | -1,543331864 | -1,862647763 | 0,319315898 |  |
| 1569680_at   | -               | -1,543331864 | -1,862647763 | 0,319315898 |  |
| 207207_at    | RBMXL2          | -1,543331864 | -1,862647763 | 0,319315898 |  |
| 207660_at    | DMD             | -1,543331864 | -1,862647763 | 0,319315898 |  |
| 208557_at    | HOXA6           | -1,543331864 | -1,862647763 | 0,319315898 |  |
| 209047_at    | AQP1            | -1,543331864 | -1,862647763 | 0,319315898 |  |
| 213478_at    | KAZN            | -1,543331864 | -1,862647763 | 0,319315898 |  |
| 215774_s_at  | SUCLG2          | -1,543331864 | -1,862647763 | 0,319315898 |  |
| 220769_s_at  | WDR78           | -1,543331864 | -1,862647763 | 0,319315898 |  |
| 223645_s_at  | TXLNG2P         | -1,543331864 | -1,862647763 | 0,319315898 |  |
| 233416_at    | -               | -1,543331864 | -1,862647763 | 0,319315898 |  |
| 233958_at    | -               | -1,543331864 | -1,862647763 | 0,319315898 |  |
| 234766_at    | OR8D2           | -1,543331864 | -1,862647763 | 0,319315898 |  |
| 236300_at    | PDE3A           | -1,543331864 | -1,862647763 | 0,319315898 |  |
| 237237_at    | -               | -1,543331864 | -1,862647763 | 0,319315898 |  |
| 242155_x_at  | RFFL            | -1,543331864 | -1,862647763 | 0,319315898 |  |
| 242211_x_at  | WDR90           | -1,543331864 | -1,862647763 | 0,319315898 |  |
| 207602_at    | TMPRSS11D       | 0,123193849  | -0,19610998  | 0,319303829 |  |
| 227316_at    | PET117          | 0,123193849  | -0,19610998  | 0,319303829 |  |
| 228615_at    | LOC286161       | 0,123193849  | -0,19610998  | 0,319303829 |  |
| 1553391_at   | CXorf58         | -2,089474779 | -2,408705138 | 0,319230359 |  |
| 1555383_a_at | POF1B           | -2,089474779 | -2,408705138 | 0,319230359 |  |
| 1561956_at   | -               | -2,089474779 | -2,408705138 | 0,319230359 |  |
| 1569588_x_at | -               | -2,089474779 | -2,408705138 | 0,319230359 |  |
| 203924_at    | GSTA1           | -2,089474779 | -2,408705138 | 0,319230359 |  |
| 207544_s_at  | ADH6            | -2,089474779 | -2,408705138 | 0,319230359 |  |
| 207886_s_at  | CALCR           | -2,089474779 | -2,408705138 | 0,319230359 |  |
| 209869_at    | ADRA2A          | -2,089474779 | -2,408705138 | 0,319230359 |  |
| 213056_at    | FRMD4B          | -2,089474779 | -2,408705138 | 0,319230359 |  |
| 215325_x_at  | C19orf26        | -2,089474779 | -2,408705138 | 0,319230359 |  |
| 221018_s_at  | TDRD1           | -2,089474779 | -2,408705138 | 0,319230359 |  |
| 223771_at    | TMEM87A         | -2,089474779 | -2,408705138 | 0,319230359 |  |
| 226930_at    | FNDC1           | -2,089474779 | -2,408705138 | 0,319230359 |  |
| 231096_at    | GDEP            | -2,089474779 | -2,408705138 | 0,319230359 |  |
| 232575_at    | PCA3            | -2,089474779 | -2,408705138 | 0,319230359 |  |
| 234007_at    | DEFB121         | -2,089474779 | -2,408705138 | 0,319230359 |  |
| 239286_at    | CDH11           | -2,089474779 | -2,408705138 | 0,319230359 |  |
| 240958_at    | UNC5C           | -2,089474779 | -2,408705138 | 0,319230359 |  |
| 241290_at    | -               | -2,089474779 | -2,408705138 | 0,319230359 |  |
| 243100_at    | NT5C1B          | -2,089474779 | -2,408705138 | 0,319230359 |  |
| 243557_at    | -               | -2,089474779 | -2,408705138 | 0,319230359 |  |
| 227455_at    | C6orf136        | 1,844820248  | 1,525647381  | 0,319172867 |  |
| 203608_at    | ALDH5A1         | 4,10413628   | 3,785040604  | 0,319095676 |  |
| 223482_at    | TMEM120A        | 2,589836943  | 2,271023131  | 0,318813812 |  |

|              |                 |              |              |             |  |
|--------------|-----------------|--------------|--------------|-------------|--|
| 217752_s_at  | CNDP2           | 2,956271699  | 2,637603218  | 0,318668481 |  |
| 1554616_at   | SERPINB8        | 0,541261317  | 0,222599095  | 0,318662222 |  |
| 1561683_at   | -               | -0,172274514 | -0,490927335 | 0,318652821 |  |
| 230819_at    | C2CD4C          | -0,172274514 | -0,490927335 | 0,318652821 |  |
| 204975_at    | EMP2            | 2,139623739  | 1,820984782  | 0,318638957 |  |
| 223592_s_at  | RNF135          | 2,531373922  | 2,212749286  | 0,318624636 |  |
| 1555715_a_at | HRH3            | 0,798390451  | 0,479907041  | 0,31848341  |  |
| 220632_s_at  | POMT2           | 0,798390451  | 0,479907041  | 0,31848341  |  |
| 242065_x_at  | IDI1            | 0,798390451  | 0,479907041  | 0,31848341  |  |
| 213704_at    | RABGGTB /// SN  | 2,571820446  | 2,253342112  | 0,318478334 |  |
| 218238_at    | GTPBP4          | 4,690399017  | 4,372110559  | 0,318288458 |  |
| 232338_at    | -               | 1,073999308  | 0,755840599  | 0,318158709 |  |
| 225947_at    | MYO19           | 3,101484927  | 2,783327323  | 0,318157604 |  |
| 1555614_at   | SUGT1P1         | 0,695652136  | 0,377530647  | 0,31812149  |  |
| 214876_s_at  | TUBGCP5         | 0,695652136  | 0,377530647  | 0,31812149  |  |
| 226898_s_at  | SFPQ            | 0,695652136  | 0,377530647  | 0,31812149  |  |
| 229032_at    | WSCD2           | 0,181384709  | -0,136643983 | 0,318028692 |  |
| 229784_at    | MGC16121        | 0,181384709  | -0,136643983 | 0,318028692 |  |
| 244660_at    | ELAVL1          | 0,181384709  | -0,136643983 | 0,318028692 |  |
| 217266_at    | RPL15           | 3,985300536  | 3,667303849  | 0,317996687 |  |
| 218381_s_at  | U2AF2           | 4,725454911  | 4,407512498  | 0,317942413 |  |
| 226269_at    | GDAP1           | 1,462198073  | 1,144305291  | 0,317892782 |  |
| 204171_at    | RPS6KB1         | 3,054253462  | 2,7363693    | 0,317884162 |  |
| 228023_x_at  | ACTG1P4 /// AM  | 1,767779954  | 1,450051551  | 0,317728403 |  |
| 1566165_at   | -               | -2,138804305 | -2,456406426 | 0,317602121 |  |
| 1570299_at   | -               | -2,138804305 | -2,456406426 | 0,317602121 |  |
| 220087_at    | BCMO1           | -2,138804305 | -2,456406426 | 0,317602121 |  |
| 231217_at    | -               | -2,138804305 | -2,456406426 | 0,317602121 |  |
| 234892_at    | -               | -2,138804305 | -2,456406426 | 0,317602121 |  |
| 237577_at    | PCNP            | -2,138804305 | -2,456406426 | 0,317602121 |  |
| 240614_at    | KCNC2           | -2,138804305 | -2,456406426 | 0,317602121 |  |
| 229355_at    | UBE2D3          | 2,614687931  | 2,297144887  | 0,317543044 |  |
| 236019_at    | RAB12           | 1,104397092  | 0,786897721  | 0,317499371 |  |
| 236274_at    | EIF3B           | 1,104397092  | 0,786897721  | 0,317499371 |  |
| 207219_at    | ZNF643          | 0,376672223  | 0,059218869  | 0,317453355 |  |
| 206196_s_at  | RUNDC3A         | -0,79540287  | -1,112851844 | 0,317448974 |  |
| 210126_at    | PSG9            | -0,79540287  | -1,112851844 | 0,317448974 |  |
| 232863_at    | ZNF815P /// ZNF | -0,79540287  | -1,112851844 | 0,317448974 |  |
| 233459_at    | POLR3E          | -0,79540287  | -1,112851844 | 0,317448974 |  |
| 243621_at    | SPACA3          | -0,79540287  | -1,112851844 | 0,317448974 |  |
| 228749_at    | ZDBF2           | 1,976645579  | 1,659204017  | 0,317441563 |  |
| 201500_s_at  | PPP1R11         | 4,049200824  | 3,731768909  | 0,317431915 |  |
| 225652_at    | -               | 3,105247586  | 2,787940144  | 0,317307442 |  |
| 238599_at    | IRAK1BP1        | 0,735041319  | 0,417770464  | 0,317270856 |  |
| 225994_at    | CPSF2           | 4,13575284   | 3,818491075  | 0,317261765 |  |
| 1557242_at   | -               | -0,946847173 | -1,264005341 | 0,317158168 |  |
| 1558208_at   | -               | -0,946847173 | -1,264005341 | 0,317158168 |  |
| 1566603_s_at | RPUSD3          | -0,946847173 | -1,264005341 | 0,317158168 |  |
| 206732_at    | SLITRK3         | -0,946847173 | -1,264005341 | 0,317158168 |  |
| 214571_at    | FGF3            | -0,946847173 | -1,264005341 | 0,317158168 |  |
| 214778_at    | MEGF8           | -0,946847173 | -1,264005341 | 0,317158168 |  |
| 220162_s_at  | CARD9           | -0,946847173 | -1,264005341 | 0,317158168 |  |
| 229314_at    | -               | -0,946847173 | -1,264005341 | 0,317158168 |  |
| 243622_at    | LOC145694       | -0,946847173 | -1,264005341 | 0,317158168 |  |
| 226543_at    | EEF1E1-MUTED    | 1,422536444  | 1,105412836  | 0,317123609 |  |
| 211952_at    | IPO5            | 2,051361651  | 1,73441697   | 0,316944681 |  |



|              |                |              |              |             |  |
|--------------|----------------|--------------|--------------|-------------|--|
| 202981_x_at  | SIAH1          | 3,42923503   | 3,112391743  | 0,316843287 |  |
| 238096_at    | LOC284023      | 1,238353345  | 0,921731975  | 0,31662137  |  |
| 227485_at    | DDX26B         | 2,122398022  | 1,805902329  | 0,316495693 |  |
| 206959_s_at  | UPF3A          | 1,05337236   | 0,73688026   | 0,316492099 |  |
| 213946_s_at  | OBSL1          | 1,05337236   | 0,73688026   | 0,316492099 |  |
| 204329_s_at  | ZNF202         | 0,425644434  | 0,109221392  | 0,316423041 |  |
| 234929_s_at  | SPATA7         | 0,425644434  | 0,109221392  | 0,316423041 |  |
| 1556061_at   | RPP30          | 1,889144008  | 1,572742379  | 0,316401629 |  |
| 213852_at    | RBM8A          | 3,130084275  | 2,813804482  | 0,316279793 |  |
| 1561387_a_at | NXPE1          | -1,470833215 | -1,787089803 | 0,316256588 |  |
| 201428_at    | CLDN4          | -1,470833215 | -1,787089803 | 0,316256588 |  |
| 206226_at    | HRG            | -1,470833215 | -1,787089803 | 0,316256588 |  |
| 208020_s_at  | CACNA1C        | -1,470833215 | -1,787089803 | 0,316256588 |  |
| 210839_s_at  | ENPP2          | -1,470833215 | -1,787089803 | 0,316256588 |  |
| 214207_s_at  | CARD10         | -1,470833215 | -1,787089803 | 0,316256588 |  |
| 217444_at    | -              | -1,470833215 | -1,787089803 | 0,316256588 |  |
| 224047_at    | -              | -1,470833215 | -1,787089803 | 0,316256588 |  |
| 230076_at    | PITPNM3        | -1,470833215 | -1,787089803 | 0,316256588 |  |
| 230512_x_at  | TMEM165        | -1,470833215 | -1,787089803 | 0,316256588 |  |
| 231196_x_at  | LINC00202      | -1,470833215 | -1,787089803 | 0,316256588 |  |
| 233112_at    | -              | -1,470833215 | -1,787089803 | 0,316256588 |  |
| 237767_at    | -              | -1,470833215 | -1,787089803 | 0,316256588 |  |
| 237810_at    | CLDN6          | -1,470833215 | -1,787089803 | 0,316256588 |  |
| 240859_at    | ZFYVE16        | -1,470833215 | -1,787089803 | 0,316256588 |  |
| 242562_at    | -              | -1,470833215 | -1,787089803 | 0,316256588 |  |
| 242930_at    | -              | -1,470833215 | -1,787089803 | 0,316256588 |  |
| 243793_at    | AHDC1          | -1,470833215 | -1,787089803 | 0,316256588 |  |
| 224267_x_at  | ZAN            | -0,033456564 | -0,34958478  | 0,316128216 |  |
| 226404_at    | RBM39          | -0,033456564 | -0,34958478  | 0,316128216 |  |
| 231400_s_at  | -              | -0,033456564 | -0,34958478  | 0,316128216 |  |
| 232995_at    | -              | -0,033456564 | -0,34958478  | 0,316128216 |  |
| 239508_x_at  | CCDC108        | -0,033456564 | -0,34958478  | 0,316128216 |  |
| 243946_at    | SMOC2          | -0,033456564 | -0,34958478  | 0,316128216 |  |
| 223298_s_at  | NT5C3          | 4,037433122  | 3,721356767  | 0,316076355 |  |
| 59375_at     | MYO15B         | 0,025976038  | -0,289989561 | 0,315965598 |  |
| 225223_at    | SMAD5          | 2,151803104  | 1,835911187  | 0,315891917 |  |
| 223824_at    | RNLS           | 2,438982012  | 2,123108223  | 0,315873788 |  |
| 1554240_a_at | ITGAL          | -2,187914861 | -2,503677622 | 0,315762761 |  |
| 1557775_a_at | -              | -2,187914861 | -2,503677622 | 0,315762761 |  |
| 1559523_at   | -              | -2,187914861 | -2,503677622 | 0,315762761 |  |
| 1561309_x_at | -              | -2,187914861 | -2,503677622 | 0,315762761 |  |
| 1563907_at   | GARNL3         | -2,187914861 | -2,503677622 | 0,315762761 |  |
| 1567374_at   | -              | -2,187914861 | -2,503677622 | 0,315762761 |  |
| 204818_at    | HSD17B2        | -2,187914861 | -2,503677622 | 0,315762761 |  |
| 219429_at    | FA2H           | -2,187914861 | -2,503677622 | 0,315762761 |  |
| 221697_at    | MAP1LC3C       | -2,187914861 | -2,503677622 | 0,315762761 |  |
| 224238_at    | -              | -2,187914861 | -2,503677622 | 0,315762761 |  |
| 231930_at    | ELMOD1 /// LOC | -2,187914861 | -2,503677622 | 0,315762761 |  |
| 232354_at    | -              | -2,187914861 | -2,503677622 | 0,315762761 |  |
| 240293_at    | CCDC153        | -2,187914861 | -2,503677622 | 0,315762761 |  |
| 240603_s_at  | ERI2           | -2,187914861 | -2,503677622 | 0,315762761 |  |
| 242954_at    | -              | -2,187914861 | -2,503677622 | 0,315762761 |  |
| 217767_at    | C3             | 0,291166226  | -0,024572586 | 0,315738812 |  |
| 216525_x_at  | PMS2P3         | 3,042527069  | 2,726791458  | 0,315735611 |  |
| 208250_s_at  | DMBT1          | 0,810733188  | 0,495031851  | 0,315701337 |  |
| 229925_at    | SLC6A17        | 0,810733188  | 0,495031851  | 0,315701337 |  |

|              |              |              |              |             |  |
|--------------|--------------|--------------|--------------|-------------|--|
| 224391_s_at  | SIAE         | 1,191926657  | 0,876248481  | 0,315678176 |  |
| 223046_at    | EGLN1        | 3,992090425  | 3,67645448   | 0,315635945 |  |
| 1552747_a_at | PP2D1        | -2,823166348 | -3,138626879 | 0,315460531 |  |
| 1561763_at   | -            | -2,823166348 | -3,138626879 | 0,315460531 |  |
| 236945_at    | CCDC171      | -2,823166348 | -3,138626879 | 0,315460531 |  |
| 237540_at    | LOC100506767 | -2,823166348 | -3,138626879 | 0,315460531 |  |
| 241545_x_at  | -            | -2,823166348 | -3,138626879 | 0,315460531 |  |
| 241926_s_at  | ERG          | -2,823166348 | -3,138626879 | 0,315460531 |  |
| 1568777_at   | EML5         | -0,299034815 | -0,614371577 | 0,315336762 |  |
| 216126_at    | -            | -0,299034815 | -0,614371577 | 0,315336762 |  |
| 220824_at    | -            | -0,299034815 | -0,614371577 | 0,315336762 |  |
| 228576_s_at  | MXRA8        | -0,299034815 | -0,614371577 | 0,315336762 |  |
| 242574_at    | FKBP15       | -0,299034815 | -0,614371577 | 0,315336762 |  |
| 243512_x_at  | -            | -0,299034815 | -0,614371577 | 0,315336762 |  |
| 218609_s_at  | NUDT2        | 1,726031811  | 1,410714371  | 0,315317439 |  |
| 242809_at    | IL1RL1       | 1,726031811  | 1,410714371  | 0,315317439 |  |
| 212021_s_at  | MKI67        | 2,586251598  | 2,271023131  | 0,315228467 |  |
| 235096_at    | LEO1         | 3,067171967  | 2,752192409  | 0,314979558 |  |
| 220474_at    | SLC25A21     | 3,5222335    | 3,207279726  | 0,314953774 |  |
| 204411_at    | KIF21B       | 0,03125738   | -0,283667828 | 0,314925207 |  |
| 209877_at    | SNCG         | 0,03125738   | -0,283667828 | 0,314925207 |  |
| 230053_at    | -            | 0,03125738   | -0,283667828 | 0,314925207 |  |
| 232126_at    | COQ2         | 0,03125738   | -0,283667828 | 0,314925207 |  |
| 236744_at    | PHPT1        | 0,03125738   | -0,283667828 | 0,314925207 |  |
| 229564_at    | RRP7A        | 0,97328325   | 0,658444279  | 0,314838971 |  |
| 208072_s_at  | DGKD         | 2,156646206  | 1,841838775  | 0,314807431 |  |
| 202770_s_at  | CCNG2        | 1,912238072  | 1,59747851   | 0,314759562 |  |
| 1557053_s_at | UBE2G2       | 5,834920167  | 5,52020409   | 0,314716077 |  |
| 229551_x_at  | ZNF367       | 2,782308844  | 2,467842989  | 0,314465855 |  |
| 244103_at    | SDE2         | 4,895888063  | 4,581441196  | 0,314446866 |  |
| 1554213_at   | ARHGEF10     | -0,221656139 | -0,536087151 | 0,314431012 |  |
| 213776_at    | LOC157562    | -0,221656139 | -0,536087151 | 0,314431012 |  |
| 235074_at    | SPRED1       | -0,221656139 | -0,536087151 | 0,314431012 |  |
| 1559716_at   | INO80C       | 0,747935635  | 0,433557298  | 0,314378337 |  |
| 230136_at    | LOC400099    | 0,747935635  | 0,433557298  | 0,314378337 |  |
| 1555241_at   | C8orf59      | 0,882651021  | 0,568365095  | 0,314285926 |  |
| 202195_s_at  | TMED5        | 2,713311265  | 2,39915583   | 0,314155435 |  |
| 223669_at    | HEMGN        | 1,274448124  | 0,960386719  | 0,314061405 |  |
| 1554948_at   | -            | -1,424023738 | -1,738067356 | 0,314043618 |  |
| 1559586_at   | LOC728868    | -1,424023738 | -1,738067356 | 0,314043618 |  |
| 201442_s_at  | ATP6AP2      | -1,424023738 | -1,738067356 | 0,314043618 |  |
| 206256_at    | CPN1         | -1,424023738 | -1,738067356 | 0,314043618 |  |
| 213003_s_at  | KIAA0146     | -1,424023738 | -1,738067356 | 0,314043618 |  |
| 214419_s_at  | CYP2C9       | -1,424023738 | -1,738067356 | 0,314043618 |  |
| 216779_at    | CYLC1        | -1,424023738 | -1,738067356 | 0,314043618 |  |
| 222167_at    | -            | -1,424023738 | -1,738067356 | 0,314043618 |  |
| 228160_at    | LOC339290    | -1,424023738 | -1,738067356 | 0,314043618 |  |
| 230743_at    | HOXB-AS3     | -1,424023738 | -1,738067356 | 0,314043618 |  |
| 231042_s_at  | -            | -1,424023738 | -1,738067356 | 0,314043618 |  |
| 233178_at    | TGIF2LY      | -1,424023738 | -1,738067356 | 0,314043618 |  |
| 233706_at    | -            | -1,424023738 | -1,738067356 | 0,314043618 |  |
| 233940_at    | -            | -1,424023738 | -1,738067356 | 0,314043618 |  |
| 236074_at    | LOC100506676 | -1,424023738 | -1,738067356 | 0,314043618 |  |
| 237544_at    | -            | -1,424023738 | -1,738067356 | 0,314043618 |  |
| 238152_at    | C11orf95     | -1,424023738 | -1,738067356 | 0,314043618 |  |
| 238222_at    | GKN2         | -1,424023738 | -1,738067356 | 0,314043618 |  |

|              |             |              |              |             |  |
|--------------|-------------|--------------|--------------|-------------|--|
| 238366_at    | C1orf228    | -1,424023738 | -1,738067356 | 0,314043618 |  |
| 239495_at    | -           | -1,424023738 | -1,738067356 | 0,314043618 |  |
| 239958_at    | LOC253039   | -1,424023738 | -1,738067356 | 0,314043618 |  |
| 240869_at    | -           | -1,424023738 | -1,738067356 | 0,314043618 |  |
| 242594_at    | BOD1L1      | -1,424023738 | -1,738067356 | 0,314043618 |  |
| 244168_s_at  | ULK4        | -1,424023738 | -1,738067356 | 0,314043618 |  |
| 244543_s_at  | BCDIN3D-AS1 | -1,424023738 | -1,738067356 | 0,314043618 |  |
| 207753_at    | ZNF304      | 2,173470163  | 1,859476797  | 0,313993366 |  |
| 1553441_at   | CNTNAP4     | -3,192553003 | -3,506469152 | 0,31391615  |  |
| 221452_s_at  | TMEM14B     | 6,408712215  | 6,094905529  | 0,313806686 |  |
| 225393_at    | GATAD2B     | 0,917308734  | 0,603679647  | 0,313629087 |  |
| 200037_s_at  | CBX3        | 6,265930995  | 5,952363964  | 0,313567031 |  |
| 223257_at    | G2E3        | 2,094906514  | 1,781437557  | 0,313468957 |  |
| 1552388_at   | FLJ30901    | -0,148196756 | -0,461594427 | 0,31339767  |  |
| 1553684_at   | PPIL6       | -0,148196756 | -0,461594427 | 0,31339767  |  |
| 1559432_at   | CCBP2       | -0,148196756 | -0,461594427 | 0,31339767  |  |
| 212963_at    | TM2D1       | -0,148196756 | -0,461594427 | 0,31339767  |  |
| 214296_x_at  | IZUMO4      | -0,148196756 | -0,461594427 | 0,31339767  |  |
| 204624_at    | ATP7B       | 3,858765357  | 3,545468469  | 0,313296889 |  |
| 201244_s_at  | RAF1        | 3,296204798  | 2,982929462  | 0,313275336 |  |
| 218385_at    | MRPS18A     | 3,25953187   | 2,946258252  | 0,313273618 |  |
| 205740_s_at  | RBM42       | 5,103580305  | 4,790501109  | 0,313079197 |  |
| 1555490_s_at | PDZD3       | -0,366776884 | -0,679763839 | 0,312986955 |  |
| 1561667_at   | -           | -0,366776884 | -0,679763839 | 0,312986955 |  |
| 1569847_at   | CGNL1       | -0,366776884 | -0,679763839 | 0,312986955 |  |
| 207026_s_at  | ATP2B3      | -0,366776884 | -0,679763839 | 0,312986955 |  |
| 217054_at    | -           | -0,366776884 | -0,679763839 | 0,312986955 |  |
| 227104_x_at  | ZNF800      | -0,366776884 | -0,679763839 | 0,312986955 |  |
| 232749_at    | -           | -0,366776884 | -0,679763839 | 0,312986955 |  |
| 235290_at    | ZNF782      | -0,366776884 | -0,679763839 | 0,312986955 |  |
| 1556037_s_at | HHIP        | 0,606430281  | 0,293518836  | 0,312911446 |  |
| 221142_s_at  | PECR        | 0,606430281  | 0,293518836  | 0,312911446 |  |
| 1554096_a_at | RBM33       | 0,44160593   | 0,128747141  | 0,312858789 |  |
| 207300_s_at  | F7          | 0,44160593   | 0,128747141  | 0,312858789 |  |
| 227303_at    | ANKS3       | 0,44160593   | 0,128747141  | 0,312858789 |  |
| 242589_x_at  | -           | 0,44160593   | 0,128747141  | 0,312858789 |  |
| 1562231_at   | -           | 0,152582607  | -0,160136748 | 0,312719355 |  |
| 208301_at    | -           | 0,152582607  | -0,160136748 | 0,312719355 |  |
| 1559282_at   | -           | -0,543051993 | -0,855751026 | 0,312699033 |  |
| 1559603_at   | GPR12       | -0,543051993 | -0,855751026 | 0,312699033 |  |
| 206972_s_at  | GPR161      | -0,543051993 | -0,855751026 | 0,312699033 |  |
| 210079_x_at  | KCNAB1      | -0,543051993 | -0,855751026 | 0,312699033 |  |
| 215858_at    | -           | -0,543051993 | -0,855751026 | 0,312699033 |  |
| 216704_at    | -           | -0,543051993 | -0,855751026 | 0,312699033 |  |
| 222724_at    | VWA1        | -0,543051993 | -0,855751026 | 0,312699033 |  |
| 229680_at    | TACO1       | -0,543051993 | -0,855751026 | 0,312699033 |  |
| 230444_at    | PDE7A       | -0,543051993 | -0,855751026 | 0,312699033 |  |
| 236124_at    | LOC153546   | -0,543051993 | -0,855751026 | 0,312699033 |  |
| 243546_at    | -           | -0,543051993 | -0,855751026 | 0,312699033 |  |
| 213244_at    | SCAMP4      | 1,352503698  | 1,039887232  | 0,312616467 |  |
| 205062_x_at  | ARID4A      | 2,05655332   | 1,743944487  | 0,312608833 |  |
| 207939_x_at  | RNPS1       | 4,176858496  | 3,864347045  | 0,312511451 |  |
| 41553_at     | OSGIN2      | 0,465232922  | 0,152806864  | 0,312426058 |  |
| 1553363_at   | C6orf195    | -2,262747984 | -2,575129729 | 0,312381745 |  |
| 1558965_at   | PHF21A      | -2,262747984 | -2,575129729 | 0,312381745 |  |
| 1559172_at   | -           | -2,262747984 | -2,575129729 | 0,312381745 |  |

|              |                 |              |              |             |  |
|--------------|-----------------|--------------|--------------|-------------|--|
| 1566419_at   | -               | -2,262747984 | -2,575129729 | 0,312381745 |  |
| 205399_at    | DCLK1           | -2,262747984 | -2,575129729 | 0,312381745 |  |
| 206048_at    | OVOL2           | -2,262747984 | -2,575129729 | 0,312381745 |  |
| 216717_at    | FAM48A          | -2,262747984 | -2,575129729 | 0,312381745 |  |
| 219529_at    | CLIC3           | -2,262747984 | -2,575129729 | 0,312381745 |  |
| 220123_at    | SLC35F5         | -2,262747984 | -2,575129729 | 0,312381745 |  |
| 222249_at    | -               | -2,262747984 | -2,575129729 | 0,312381745 |  |
| 228643_at    | LOC100506233    | -2,262747984 | -2,575129729 | 0,312381745 |  |
| 235658_at    | -               | -2,262747984 | -2,575129729 | 0,312381745 |  |
| 240647_at    | -               | -2,262747984 | -2,575129729 | 0,312381745 |  |
| 240658_at    | -               | -2,262747984 | -2,575129729 | 0,312381745 |  |
| 240857_at    | DNAH9           | -2,262747984 | -2,575129729 | 0,312381745 |  |
| 241960_at    | CSMD1           | -2,262747984 | -2,575129729 | 0,312381745 |  |
| 242568_s_at  | -               | -2,262747984 | -2,575129729 | 0,312381745 |  |
| 1562805_at   | TLR8-AS1        | -0,078265071 | -0,39061235  | 0,312347279 |  |
| 202249_s_at  | DCAF8           | 0,792179257  | 0,479907041  | 0,312272216 |  |
| 203395_s_at  | HES1            | 1,46610492   | 1,153866761  | 0,312238159 |  |
| 218908_at    | ASPSCR1         | 1,46610492   | 1,153866761  | 0,312238159 |  |
| 209175_at    | SEC23IP         | 3,575646363  | 3,263564154  | 0,312082209 |  |
| 64418_at     | SYNRG           | 2,4830283    | 2,170981159  | 0,312047141 |  |
| 238937_at    | ZNF420          | 3,536237877  | 3,22439681   | 0,311841067 |  |
| 204897_at    | PTGER4          | 1,40228911   | 1,090553537  | 0,311735572 |  |
| 205574_x_at  | BMP1            | 0,209623097  | -0,102100538 | 0,311723635 |  |
| 220879_at    | -               | 0,209623097  | -0,102100538 | 0,311723635 |  |
| 233159_at    | STARD13         | 0,209623097  | -0,102100538 | 0,311723635 |  |
| 243757_at    | -               | 0,209623097  | -0,102100538 | 0,311723635 |  |
| 203706_s_at  | FZD7            | 1,742232072  | 1,43051703   | 0,311715042 |  |
| 225537_at    | TRAPPC6B        | 3,7111030028 | 3,399383202  | 0,311646826 |  |
| 226946_at    | NADKD1          | 2,837639949  | 2,526063925  | 0,311576024 |  |
| 226070_at    | C9orf142        | 1,593009234  | 1,281471383  | 0,311537851 |  |
| 1554298_a_at | WDR49           | -2,866296344 | -3,177802286 | 0,311505942 |  |
| 1558834_s_at | AKNAD1          | -2,866296344 | -3,177802286 | 0,311505942 |  |
| 1570515_a_at | FILIP1          | -2,866296344 | -3,177802286 | 0,311505942 |  |
| 221182_at    | C1orf129        | -2,866296344 | -3,177802286 | 0,311505942 |  |
| 224017_at    | TBX22           | -2,866296344 | -3,177802286 | 0,311505942 |  |
| 236203_at    | HLA-DQA1 /// LO | -2,866296344 | -3,177802286 | 0,311505942 |  |
| 239871_at    | CLTC            | -2,866296344 | -3,177802286 | 0,311505942 |  |
| 244817_at    | CARS2           | -2,866296344 | -3,177802286 | 0,311505942 |  |
| 202028_s_at  | RPL38           | 5,136435239  | 4,8249493    | 0,311485939 |  |
| 1554307_at   | LOC644852       | -2,64318869  | -2,954576755 | 0,311388065 |  |
| 1554793_at   | UBE3C           | -2,64318869  | -2,954576755 | 0,311388065 |  |
| 1556967_at   | ZDHC14          | -2,64318869  | -2,954576755 | 0,311388065 |  |
| 1557606_at   | -               | -2,64318869  | -2,954576755 | 0,311388065 |  |
| 1560201_at   | ZNF713          | -2,64318869  | -2,954576755 | 0,311388065 |  |
| 1563139_at   | -               | -2,64318869  | -2,954576755 | 0,311388065 |  |
| 1563339_at   | -               | -2,64318869  | -2,954576755 | 0,311388065 |  |
| 1564144_at   | -               | -2,64318869  | -2,954576755 | 0,311388065 |  |
| 1567183_s_at | -               | -2,64318869  | -2,954576755 | 0,311388065 |  |
| 1569344_a_at | -               | -2,64318869  | -2,954576755 | 0,311388065 |  |
| 206211_at    | SELE            | -2,64318869  | -2,954576755 | 0,311388065 |  |
| 213580_at    | -               | -2,64318869  | -2,954576755 | 0,311388065 |  |
| 214837_at    | ALB             | -2,64318869  | -2,954576755 | 0,311388065 |  |
| 216109_at    | MED13L          | -2,64318869  | -2,954576755 | 0,311388065 |  |
| 219552_at    | SVEP1           | -2,64318869  | -2,954576755 | 0,311388065 |  |
| 222332_at    | -               | -2,64318869  | -2,954576755 | 0,311388065 |  |
| 235382_at    | AQPEP           | -2,64318869  | -2,954576755 | 0,311388065 |  |

|              |                    |              |              |             |  |
|--------------|--------------------|--------------|--------------|-------------|--|
| 240000_at    | -                  | -2,64318869  | -2,954576755 | 0,311388065 |  |
| 212064_x_at  | MAZ                | 2,427005622  | 2,115788273  | 0,311217349 |  |
| 203787_at    | SSBP2              | 1,614289682  | 1,303116084  | 0,311173597 |  |
| 214112_s_at  | CXorf40A /// CXo   | 2,864529541  | 2,553413592  | 0,311115949 |  |
| 214661_s_at  | NOP14              | 2,864529541  | 2,553413592  | 0,311115949 |  |
| 217910_x_at  | MLX                | 3,199783157  | 2,888726553  | 0,311056604 |  |
| 208451_s_at  | C4A /// C4B /// LC | 0,728550685  | 0,417770464  | 0,310780222 |  |
| 213840_s_at  | MRPS12             | 0,728550685  | 0,417770464  | 0,310780222 |  |
| 232475_at    | C15orf42           | 0,728550685  | 0,417770464  | 0,310780222 |  |
| 227231_at    | KIAA1211           | 1,079110292  | 0,768343791  | 0,310766502 |  |
| 1554084_a_at | NOL9               | 1,556829052  | 1,246149888  | 0,310679163 |  |
| 91816_f_at   | MEX3D              | 2,407837301  | 2,097324242  | 0,310513059 |  |
| 213756_s_at  | HSF1               | 0,57782909   | 0,26733076   | 0,310498331 |  |
| 226411_at    | EVI5L              | 0,57782909   | 0,26733076   | 0,310498331 |  |
| 230876_at    | ZNF883             | 0,57782909   | 0,26733076   | 0,310498331 |  |
| 41037_at     | TEAD4              | -0,038978033 | -0,349437029 | 0,310458996 |  |
| 215739_s_at  | TUBGCP3            | 0,052199481  | -0,258114234 | 0,310313714 |  |
| 235012_at    | LRCH1              | 0,052199481  | -0,258114234 | 0,310313714 |  |
| 236426_at    | KIF19              | 0,052199481  | -0,258114234 | 0,310313714 |  |
| 202515_at    | DLG1               | 2,860082603  | 2,549796788  | 0,310285815 |  |
| 225462_at    | TMEM128            | 2,506929603  | 2,196649505  | 0,310280098 |  |
| 235410_at    | NPHP3              | 1,339784194  | 1,029536893  | 0,310247301 |  |
| 1552509_a_at | CD300LG            | -2,311268652 | -2,621331989 | 0,310063338 |  |
| 1552809_at   | RFX4               | -2,311268652 | -2,621331989 | 0,310063338 |  |
| 1562387_at   | C5orf42            | -2,311268652 | -2,621331989 | 0,310063338 |  |
| 1564235_at   | LOC729866          | -2,311268652 | -2,621331989 | 0,310063338 |  |
| 1569128_at   | C3orf38            | -2,311268652 | -2,621331989 | 0,310063338 |  |
| 1569861_at   | TRAF5              | -2,311268652 | -2,621331989 | 0,310063338 |  |
| 205943_at    | TDO2               | -2,311268652 | -2,621331989 | 0,310063338 |  |
| 206153_at    | CYP4F11            | -2,311268652 | -2,621331989 | 0,310063338 |  |
| 207010_at    | GABRB1             | -2,311268652 | -2,621331989 | 0,310063338 |  |
| 207293_s_at  | AGTR2              | -2,311268652 | -2,621331989 | 0,310063338 |  |
| 219513_s_at  | SH2D3A             | -2,311268652 | -2,621331989 | 0,310063338 |  |
| 231506_at    | -                  | -2,311268652 | -2,621331989 | 0,310063338 |  |
| 237446_at    | -                  | -2,311268652 | -2,621331989 | 0,310063338 |  |
| 238368_at    | -                  | -2,311268652 | -2,621331989 | 0,310063338 |  |
| 238940_at    | KLF12              | -2,311268652 | -2,621331989 | 0,310063338 |  |
| 244852_at    | DSEL               | -2,311268652 | -2,621331989 | 0,310063338 |  |
| 212018_s_at  | RSL1D1             | 5,163454645  | 4,853468768  | 0,309985877 |  |
| 226366_at    | SHPRH              | 3,292909151  | 2,982929462  | 0,309979689 |  |
| 204751_x_at  | DSC2               | 0,317354302  | 0,007421914  | 0,309932388 |  |
| 232772_at    | LOC221272          | 0,317354302  | 0,007421914  | 0,309932388 |  |
| 223404_s_at  | TRMT1L             | 2,886560922  | 2,576704359  | 0,309856562 |  |
| 1552468_a_at | DSCR10             | -1,353583928 | -1,663414495 | 0,309830567 |  |
| 1561314_at   | LOC100506387       | -1,353583928 | -1,663414495 | 0,309830567 |  |
| 207637_at    | WSCD2              | -1,353583928 | -1,663414495 | 0,309830567 |  |
| 207710_at    | LCE2B              | -1,353583928 | -1,663414495 | 0,309830567 |  |
| 208886_at    | H1F0               | -1,353583928 | -1,663414495 | 0,309830567 |  |
| 210805_x_at  | LOC100506403 /     | -1,353583928 | -1,663414495 | 0,309830567 |  |
| 234658_at    | -                  | -1,353583928 | -1,663414495 | 0,309830567 |  |
| 236214_at    | FAM71F1            | -1,353583928 | -1,663414495 | 0,309830567 |  |
| 239772_x_at  | DHX30              | -1,353583928 | -1,663414495 | 0,309830567 |  |
| 244853_at    | -                  | -1,353583928 | -1,663414495 | 0,309830567 |  |
| 232266_x_at  | CDK13              | 3,812716554  | 3,503081281  | 0,309635273 |  |
| 209993_at    | ABCB1              | 1,269985355  | 0,960386719  | 0,309598635 |  |
| 208137_x_at  | ZNF611             | 1,751865623  | 1,442269454  | 0,309596169 |  |

|              |                  |              |              |             |  |
|--------------|------------------|--------------|--------------|-------------|--|
| 223295_s_at  | LUC7L            | 3,58196103   | 3,272369332  | 0,309591698 |  |
| 224751_at    | C7orf73 /// LOC1 | 5,271770432  | 4,962222456  | 0,309547976 |  |
| 208766_s_at  | HNRNPR           | 6,40037808   | 6,090866876  | 0,309511204 |  |
| 231768_at    | USF1             | 1,390002893  | 1,080561626  | 0,309441268 |  |
| 239250_at    | ZNF542           | 3,548266005  | 3,239069096  | 0,30919691  |  |
| 226657_at    | C17orf103        | 0,661985843  | 0,352836757  | 0,309149085 |  |
| 244587_at    | ATF7             | 0,661985843  | 0,352836757  | 0,309149085 |  |
| 210517_s_at  | AKAP12           | 3,604290432  | 3,295230443  | 0,309059989 |  |
| 204662_at    | CCP110           | 3,115233629  | 2,806245339  | 0,30898829  |  |
| 202749_at    | WRB              | 5,883566792  | 5,574611027  | 0,308955765 |  |
| 223724_s_at  | STAG3L1 /// STA  | 1,62481334   | 1,315948728  | 0,308864612 |  |
| 213555_at    | RWDD2A           | 1,000476627  | 0,691645685  | 0,308830942 |  |
| 230927_at    | -                | 1,000476627  | 0,691645685  | 0,308830942 |  |
| 1561219_x_at | -                | -0,741668563 | -1,050406615 | 0,308738052 |  |
| 1562674_at   | -                | -0,741668563 | -1,050406615 | 0,308738052 |  |
| 1568943_at   | INPP5D           | -0,741668563 | -1,050406615 | 0,308738052 |  |
| 213830_at    | YME1L1           | -0,741668563 | -1,050406615 | 0,308738052 |  |
| 222293_at    | CADM4            | -0,741668563 | -1,050406615 | 0,308738052 |  |
| 228209_at    | LOC100527964     | -0,741668563 | -1,050406615 | 0,308738052 |  |
| 231475_at    | TBC1D21          | -0,741668563 | -1,050406615 | 0,308738052 |  |
| 236366_at    | LOC440149        | -0,741668563 | -1,050406615 | 0,308738052 |  |
| 243830_at    | -                | -0,741668563 | -1,050406615 | 0,308738052 |  |
| 1558956_s_at | IFT80            | 2,535098095  | 2,226407528  | 0,308690567 |  |
| 208313_s_at  | SF1              | 3,825698252  | 3,517040489  | 0,308657762 |  |
| 1558508_a_at | C1orf53          | 2,701760055  | 2,39311332   | 0,308646736 |  |
| 218000_s_at  | PHLDA1           | 0,702292136  | 0,393761504  | 0,308530632 |  |
| 219235_s_at  | PHACTR4          | 1,940595304  | 1,632095957  | 0,308499347 |  |
| 217349_s_at  | PRICKLE3         | 0,171847695  | -0,136643983 | 0,308491678 |  |
| 228216_at    | -                | 0,171847695  | -0,136643983 | 0,308491678 |  |
| 218334_at    | THOC7            | 4,541443681  | 4,23300737   | 0,308436311 |  |
| 212242_at    | TUBA4A           | 1,348276312  | 1,039887232  | 0,30838908  |  |
| 204578_at    | PPIP5K1          | 0,417596971  | 0,109221392  | 0,308375578 |  |
| 239815_at    | -                | 0,417596971  | 0,109221392  | 0,308375578 |  |
| 240279_at    | -                | 0,417596971  | 0,109221392  | 0,308375578 |  |
| 225903_at    | PIGU             | 3,03990821   | 2,731588328  | 0,308319882 |  |
| 208698_s_at  | NONO             | 5,171253382  | 4,862972786  | 0,308280597 |  |
| 212446_s_at  | CERS6            | 3,288503211  | 2,980244813  | 0,308258398 |  |
| 226501_at    | XPNPEP3          | 3,010782559  | 2,702564916  | 0,308217643 |  |
| 209365_s_at  | ECM1             | 1,485482016  | 1,177496821  | 0,307985195 |  |
| 222093_s_at  | INO80B           | 1,485482016  | 1,177496821  | 0,307985195 |  |
| 240199_x_at  | ZNF345           | 0,911589958  | 0,603679647  | 0,307910312 |  |
| 201048_x_at  | RAB6A            | 1,063722698  | 0,755840599  | 0,307882098 |  |
| 220538_at    | ADM2             | 1,201332287  | 0,893473268  | 0,307859019 |  |
| 232146_at    | NDUFC1           | 1,201332287  | 0,893473268  | 0,307859019 |  |
| 207876_s_at  | FLNC             | 2,44295215   | 2,135226207  | 0,307725942 |  |
| 220608_s_at  | -                | 0,46522187   | 0,157549243  | 0,307672627 |  |
| 1552578_a_at | MYO3B            | 0,228146222  | -0,079522948 | 0,30766917  |  |
| 1555536_at   | ANTXR2           | 0,228146222  | -0,079522948 | 0,30766917  |  |
| 240398_at    | -                | 0,228146222  | -0,079522948 | 0,30766917  |  |
| 205641_s_at  | TRADD            | 1,880387527  | 1,572742379  | 0,307645148 |  |
| 214677_x_at  | IGLC1            | -0,423248115 | -0,730778808 | 0,307530693 |  |
| 223653_x_at  | CELF4            | -0,423248115 | -0,730778808 | 0,307530693 |  |
| 226061_s_at  | NUDT3            | -0,423248115 | -0,730778808 | 0,307530693 |  |
| 234023_s_at  | CENPJ            | -0,423248115 | -0,730778808 | 0,307530693 |  |
| 239906_at    | -                | -0,423248115 | -0,730778808 | 0,307530693 |  |
| 240145_at    | -                | -0,423248115 | -0,730778808 | 0,307530693 |  |

|              |                |              |              |             |  |
|--------------|----------------|--------------|--------------|-------------|--|
| 240479_at    | HS3ST5         | -0,423248115 | -0,730778808 | 0,307530693 |  |
| 241393_at    | IPP            | -0,423248115 | -0,730778808 | 0,307530693 |  |
| 241841_at    | -              | -0,423248115 | -0,730778808 | 0,307530693 |  |
| 242229_at    | NAPEPLD        | -0,423248115 | -0,730778808 | 0,307530693 |  |
| 209996_x_at  | PCM1           | 1,094335495  | 0,786897721  | 0,307437773 |  |
| 206020_at    | SOCS6          | 0,945567441  | 0,638150376  | 0,307417065 |  |
| 225384_at    | DOCK7          | 0,945567441  | 0,638150376  | 0,307417065 |  |
| 226914_at    | ARPC5L         | 2,621710292  | 2,314300277  | 0,307410014 |  |
| 212043_at    | TGOLN2         | 5,01267994   | 4,705281859  | 0,307398081 |  |
| 227991_x_at  | ZBTB43         | 1,814495998  | 1,507116528  | 0,307379471 |  |
| 208118_x_at  | LOC100271836 / | 1,631786706  | 1,324440845  | 0,307345861 |  |
| 214395_x_at  | EEF1D          | 1,530951994  | 1,223626587  | 0,307325406 |  |
| 1557017_at   | -              | -3,250025915 | -3,557342128 | 0,307316213 |  |
| 200686_s_at  | SRSF11         | 5,936622427  | 5,629398466  | 0,30722396  |  |
| 1554385_a_at | PADI2          | -0,259832361 | -0,566887459 | 0,307055098 |  |
| 210300_at    | REM1           | -0,259832361 | -0,566887459 | 0,307055098 |  |
| 214187_x_at  | CTDSPL         | -0,259832361 | -0,566887459 | 0,307055098 |  |
| 226266_at    | PGS1           | -0,259832361 | -0,566887459 | 0,307055098 |  |
| 230044_at    | PCYT2          | -0,259832361 | -0,566887459 | 0,307055098 |  |
| 233696_at    | -              | -0,259832361 | -0,566887459 | 0,307055098 |  |
| 241845_at    | -              | -0,259832361 | -0,566887459 | 0,307055098 |  |
| 244254_at    | -              | -0,259832361 | -0,566887459 | 0,307055098 |  |
| 206113_s_at  | RAB5A          | 2,700102307  | 2,39311332   | 0,306988987 |  |
| 1564069_at   | HOTTIP         | -0,512251684 | -0,819238336 | 0,306986652 |  |
| 201911_s_at  | FARP1          | -0,512251684 | -0,819238336 | 0,306986652 |  |
| 212763_at    | CAMSAP2        | -0,512251684 | -0,819238336 | 0,306986652 |  |
| 220439_at    | RIN3           | -0,512251684 | -0,819238336 | 0,306986652 |  |
| 221930_at    | PHF7           | -0,512251684 | -0,819238336 | 0,306986652 |  |
| 235558_at    | RBMS2          | -0,512251684 | -0,819238336 | 0,306986652 |  |
| 237251_at    | LRRC71         | -0,512251684 | -0,819238336 | 0,306986652 |  |
| 1557788_a_at | LINC00476      | -1,308181863 | -1,615132408 | 0,306950545 |  |
| 1565758_at   | -              | -1,308181863 | -1,615132408 | 0,306950545 |  |
| 1565949_x_at | CHML           | -1,308181863 | -1,615132408 | 0,306950545 |  |
| 1566837_at   | -              | -1,308181863 | -1,615132408 | 0,306950545 |  |
| 1569243_at   | -              | -1,308181863 | -1,615132408 | 0,306950545 |  |
| 205368_at    | FAM131B        | -1,308181863 | -1,615132408 | 0,306950545 |  |
| 210394_x_at  | SSX4 /// SSX4B | -1,308181863 | -1,615132408 | 0,306950545 |  |
| 210549_s_at  | CCL23          | -1,308181863 | -1,615132408 | 0,306950545 |  |
| 216165_at    | -              | -1,308181863 | -1,615132408 | 0,306950545 |  |
| 222174_at    | -              | -1,308181863 | -1,615132408 | 0,306950545 |  |
| 223924_at    | TTC25          | -1,308181863 | -1,615132408 | 0,306950545 |  |
| 226830_x_at  | -              | -1,308181863 | -1,615132408 | 0,306950545 |  |
| 227450_at    | ERP27          | -1,308181863 | -1,615132408 | 0,306950545 |  |
| 232093_at    | LINC00085      | -1,308181863 | -1,615132408 | 0,306950545 |  |
| 232222_at    | C18orf49       | -1,308181863 | -1,615132408 | 0,306950545 |  |
| 232330_at    | C7orf44        | -1,308181863 | -1,615132408 | 0,306950545 |  |
| 233790_at    | -              | -1,308181863 | -1,615132408 | 0,306950545 |  |
| 234249_at    | -              | -1,308181863 | -1,615132408 | 0,306950545 |  |
| 235392_at    | -              | -1,308181863 | -1,615132408 | 0,306950545 |  |
| 236408_at    | -              | -1,308181863 | -1,615132408 | 0,306950545 |  |
| 239360_at    | -              | -1,308181863 | -1,615132408 | 0,306950545 |  |
| 242601_at    | HEPACAM2       | -1,308181863 | -1,615132408 | 0,306950545 |  |
| 243941_at    | -              | -1,308181863 | -1,615132408 | 0,306950545 |  |
| 205899_at    | CCNA1          | 2,009141686  | 1,702196344  | 0,306945342 |  |
| 222870_s_at  | B3GNT2         | 4,378950369  | 4,072129637  | 0,306820731 |  |
| 209731_at    | NTHL1          | 2,097427503  | 1,790660532  | 0,306766971 |  |

|              |                 |              |              |             |  |
|--------------|-----------------|--------------|--------------|-------------|--|
| 209064_x_at  | PAIP1           | 3,132544588  | 2,825817328  | 0,30672726  |  |
| 204408_at    | APEX2           | 3,831009889  | 3,524430539  | 0,30657935  |  |
| 35974_at     | LRMP            | 0,449520941  | 0,143220067  | 0,306300874 |  |
| 204034_at    | ETHE1           | 2,525769574  | 2,21959457   | 0,306175004 |  |
| 227334_at    | USP54           | 1,767779954  | 1,461646549  | 0,306133404 |  |
| 212753_at    | PCGF3           | 2,472384965  | 2,166264721  | 0,306120244 |  |
| 1553387_at   | ATM             | -2,384869671 | -2,690860744 | 0,305991073 |  |
| 1555299_s_at | ERVW-1          | -2,384869671 | -2,690860744 | 0,305991073 |  |
| 1556521_a_at | -               | -2,384869671 | -2,690860744 | 0,305991073 |  |
| 1559044_at   | EXOSC1          | -2,384869671 | -2,690860744 | 0,305991073 |  |
| 1559336_at   | -               | -2,384869671 | -2,690860744 | 0,305991073 |  |
| 1560705_at   | -               | -2,384869671 | -2,690860744 | 0,305991073 |  |
| 1562011_at   | LOC100506413    | -2,384869671 | -2,690860744 | 0,305991073 |  |
| 1563136_at   | -               | -2,384869671 | -2,690860744 | 0,305991073 |  |
| 1568732_at   | -               | -2,384869671 | -2,690860744 | 0,305991073 |  |
| 217532_x_at  | -               | -2,384869671 | -2,690860744 | 0,305991073 |  |
| 229440_at    | RBM47           | -2,384869671 | -2,690860744 | 0,305991073 |  |
| 241198_s_at  | C11orf70        | -2,384869671 | -2,690860744 | 0,305991073 |  |
| 241915_at    | ACSM2B          | -2,384869671 | -2,690860744 | 0,305991073 |  |
| 207833_s_at  | HLCS            | 1,210676994  | 0,904843258  | 0,305833736 |  |
| 225112_at    | ABI2            | 2,609398637  | 2,303602088  | 0,30579655  |  |
| 223492_s_at  | LRRFIP1         | -0,112808516 | -0,41858459  | 0,305776073 |  |
| 219247_s_at  | ZDHHC14         | 1,073999308  | 0,768343791  | 0,305655518 |  |
| 235339_at    | SETDB2          | 1,073999308  | 0,768343791  | 0,305655518 |  |
| 211681_s_at  | PDLIM5          | 1,805273023  | 1,499637023  | 0,305636001 |  |
| 230250_at    | PTPRB           | 0,822971223  | 0,51742585   | 0,305545373 |  |
| 212975_at    | DENND3          | 0,384950573  | 0,079428135  | 0,305522438 |  |
| 229562_at    | RPL10A          | 0,384950573  | 0,079428135  | 0,305522438 |  |
| 231182_at    | WIPF1           | 0,384950573  | 0,079428135  | 0,305522438 |  |
| 232437_at    | CPSF3L          | 0,384950573  | 0,079428135  | 0,305522438 |  |
| 1556850_at   | CEP290          | -1,026571149 | -1,332017329 | 0,30544618  |  |
| 209354_at    | TNFRSF14        | -1,026571149 | -1,332017329 | 0,30544618  |  |
| 211485_s_at  | FGF18           | -1,026571149 | -1,332017329 | 0,30544618  |  |
| 213014_at    | LOC644172 /// M | -1,026571149 | -1,332017329 | 0,30544618  |  |
| 214276_at    | KLF12           | -1,026571149 | -1,332017329 | 0,30544618  |  |
| 231192_at    | LPAR3           | -1,026571149 | -1,332017329 | 0,30544618  |  |
| 234631_at    | KRTAP4-8        | -1,026571149 | -1,332017329 | 0,30544618  |  |
| 234818_at    | TMEM108         | -1,026571149 | -1,332017329 | 0,30544618  |  |
| 239643_at    | LOC100129516    | -1,026571149 | -1,332017329 | 0,30544618  |  |
| 242883_at    | OTOS            | -1,026571149 | -1,332017329 | 0,30544618  |  |
| 243719_at    | STK19           | -1,026571149 | -1,332017329 | 0,30544618  |  |
| 1561094_a_at | SLC22A25        | -2,930741289 | -3,236070201 | 0,305328912 |  |
| 1562287_at   | SNTG1           | -2,930741289 | -3,236070201 | 0,305328912 |  |
| 1562616_at   | -               | -2,930741289 | -3,236070201 | 0,305328912 |  |
| 232980_at    | LMBRD1          | -2,930741289 | -3,236070201 | 0,305328912 |  |
| 234244_at    | RPF1            | -2,930741289 | -3,236070201 | 0,305328912 |  |
| 235144_at    | RASEF           | -2,930741289 | -3,236070201 | 0,305328912 |  |
| 236089_at    | -               | -2,930741289 | -3,236070201 | 0,305328912 |  |
| 200884_at    | CKB             | 4,274216313  | 3,968932193  | 0,30528412  |  |
| 204159_at    | CDKN2C          | 2,47626436   | 2,170981159  | 0,305283201 |  |
| 209305_s_at  | GADD45B         | 0,641402394  | 0,336136178  | 0,305266217 |  |
| 223114_at    | COQ5            | 3,076146581  | 2,770953871  | 0,30519271  |  |
| 227600_at    | MRPS30          | 0,859074518  | 0,553993624  | 0,305080894 |  |
| 224694_at    | ANTXR1          | 2,37600538   | 2,071071048  | 0,304934332 |  |
| 202752_x_at  | SLC7A8          | 1,542099044  | 1,23718272   | 0,304916324 |  |
| 213054_at    | HAUS5           | 1,542099044  | 1,23718272   | 0,304916324 |  |



|              |                  |              |              |             |  |
|--------------|------------------|--------------|--------------|-------------|--|
| 204123_at    | LIG3             | 1,292162421  | 0,987376598  | 0,304785823 |  |
| 202514_at    | DLG1             | 1,774096855  | 1,469325098  | 0,304771757 |  |
| 212074_at    | SUN1             | 3,58914411   | 3,284389368  | 0,304754742 |  |
| 213293_s_at  | TRIM22           | 0,682279745  | 0,377530647  | 0,304749099 |  |
| 1555815_a_at | L3MBTL2          | 1,434549838  | 1,129843209  | 0,304706629 |  |
| 1560713_a_at | ELFN2            | 0,020670649  | -0,283667828 | 0,304338477 |  |
| 219218_at    | BAHCC1           | 0,020670649  | -0,283667828 | 0,304338477 |  |
| 231752_at    | NPBWR1           | 0,020670649  | -0,283667828 | 0,304338477 |  |
| 241852_at    | -                | 0,020670649  | -0,283667828 | 0,304338477 |  |
| 243004_at    | -                | 0,020670649  | -0,283667828 | 0,304338477 |  |
| 1559501_at   | CBR3-AS1         | 0,480753764  | 0,176436073  | 0,30431769  |  |
| 204579_at    | FGFR4            | 0,480753764  | 0,176436073  | 0,30431769  |  |
| 218879_s_at  | MTHFSD           | 0,480753764  | 0,176436073  | 0,30431769  |  |
| 223661_at    | NUCKS1           | 0,480753764  | 0,176436073  | 0,30431769  |  |
| 202347_s_at  | UBE2K            | 4,651470922  | 4,347322916  | 0,304148006 |  |
| 209369_at    | ANXA3            | 1,722769813  | 1,418668082  | 0,304101731 |  |
| 1557192_at   | -                | -0,85085127  | -1,154897679 | 0,304046409 |  |
| 1560255_at   | C10orf31         | -0,85085127  | -1,154897679 | 0,304046409 |  |
| 203317_at    | PSD4             | -0,85085127  | -1,154897679 | 0,304046409 |  |
| 204322_at    | GOLIM4           | -0,85085127  | -1,154897679 | 0,304046409 |  |
| 205028_at    | TRO              | -0,85085127  | -1,154897679 | 0,304046409 |  |
| 205990_s_at  | WNT5A            | -0,85085127  | -1,154897679 | 0,304046409 |  |
| 210298_x_at  | FHL1             | -0,85085127  | -1,154897679 | 0,304046409 |  |
| 217685_at    | SLC16A3          | -0,85085127  | -1,154897679 | 0,304046409 |  |
| 230996_at    | LPP              | -0,85085127  | -1,154897679 | 0,304046409 |  |
| 235402_at    | PPP1R32          | -0,85085127  | -1,154897679 | 0,304046409 |  |
| 241450_at    | RSPO1            | -0,85085127  | -1,154897679 | 0,304046409 |  |
| 1554082_a_at | NOL9             | 2,344516784  | 2,040470494  | 0,30404629  |  |
| 52255_s_at   | COL5A3           | 0,295565668  | -0,008476122 | 0,30404179  |  |
| 229815_at    | TMEM161B-AS1     | 1,504602299  | 1,200746069  | 0,30385623  |  |
| 227222_at    | FBXO10           | 0,962260738  | 0,658444279  | 0,303816459 |  |
| 227296_at    | MFSD3            | 0,962260738  | 0,658444279  | 0,303816459 |  |
| 223041_at    | CD99L2           | 0,760715727  | 0,456918297  | 0,303797429 |  |
| 225774_at    | RSPRY1           | 2,796341835  | 2,492544876  | 0,303796959 |  |
| 227665_at    | -                | 2,369762403  | 2,066015817  | 0,303746586 |  |
| 213857_s_at  | CD47             | 5,401369722  | 5,097659882  | 0,30370984  |  |
| 1552348_at   | PRSS33           | 0,083054335  | -0,220592223 | 0,303646558 |  |
| 1562890_at   | -                | 0,083054335  | -0,220592223 | 0,303646558 |  |
| 231071_at    | -                | 0,083054335  | -0,220592223 | 0,303646558 |  |
| 235026_at    | C12orf66         | 0,083054335  | -0,220592223 | 0,303646558 |  |
| 233748_x_at  | PRKAG2           | 1,394109935  | 1,090553537  | 0,303556398 |  |
| 219905_at    | ERMAP            | 1,168140757  | 0,864649967  | 0,30349079  |  |
| 53202_at     | C7orf25 /// PSMA | -1,583691226 | -1,887156996 | 0,30346577  |  |
| 1559920_a_at | CECR5-AS1        | -2,43257096  | -2,735862426 | 0,303291466 |  |
| 1562316_at   | -                | -2,43257096  | -2,735862426 | 0,303291466 |  |
| 1569354_at   | -                | -2,43257096  | -2,735862426 | 0,303291466 |  |
| 204052_s_at  | SFRP4            | -2,43257096  | -2,735862426 | 0,303291466 |  |
| 206757_at    | PDE5A            | -2,43257096  | -2,735862426 | 0,303291466 |  |
| 215589_at    | -                | -2,43257096  | -2,735862426 | 0,303291466 |  |
| 217431_x_at  | CYBB             | -2,43257096  | -2,735862426 | 0,303291466 |  |
| 237588_at    | -                | -2,43257096  | -2,735862426 | 0,303291466 |  |
| 239819_at    | -                | -2,43257096  | -2,735862426 | 0,303291466 |  |
| 241075_at    | RIMKLA           | -2,43257096  | -2,735862426 | 0,303291466 |  |
| 241401_at    | WDFY3-AS2        | -2,43257096  | -2,735862426 | 0,303291466 |  |
| 212220_at    | PSME4            | 0,57058931   | 0,26733076   | 0,303258551 |  |
| 1555065_x_at | USP6             | -0,706943342 | -1,010192375 | 0,303249033 |  |

|              |                 |              |              |             |  |
|--------------|-----------------|--------------|--------------|-------------|--|
| 1559237_a_at | LOC100507108    | -0,706943342 | -1,010192375 | 0,303249033 |  |
| 209466_x_at  | LOC100287705 /  | -0,706943342 | -1,010192375 | 0,303249033 |  |
| 213381_at    | VSTM4           | -0,706943342 | -1,010192375 | 0,303249033 |  |
| 220446_s_at  | CHST4           | -0,706943342 | -1,010192375 | 0,303249033 |  |
| 222337_at    | -               | -0,706943342 | -1,010192375 | 0,303249033 |  |
| 225020_at    | DAB2IP          | -0,706943342 | -1,010192375 | 0,303249033 |  |
| 226695_at    | PRRX1           | -0,706943342 | -1,010192375 | 0,303249033 |  |
| 233641_s_at  | FAM167A         | -0,706943342 | -1,010192375 | 0,303249033 |  |
| 239430_at    | IGFL1           | -0,706943342 | -1,010192375 | 0,303249033 |  |
| 227693_at    | WDR20           | 2,182996494  | 1,879785595  | 0,303210899 |  |
| 222620_s_at  | DNAJC1          | 2,745814053  | 2,442710777  | 0,303103276 |  |
| 235005_at    | DIS3L           | 1,917954284  | 1,614891062  | 0,303063223 |  |
| 209609_s_at  | MRPL9           | 4,864780677  | 4,56182315   | 0,302957527 |  |
| 241632_x_at  | -               | 1,224581536  | 0,921731975  | 0,30284956  |  |
| 236550_s_at  | ZNF311          | 0,613492853  | 0,310717132  | 0,302775721 |  |
| 204505_s_at  | EPB49           | 1,251994932  | 0,949447784  | 0,302547149 |  |
| 234304_s_at  | IPO11           | 3,265148651  | 2,962671751  | 0,3024769   |  |
| 202905_x_at  | NBN             | 2,522021211  | 2,21959457   | 0,302426641 |  |
| 214352_s_at  | KRAS            | 0,20027154   | -0,102100538 | 0,302372077 |  |
| 230748_at    | SLC16A6         | 0,20027154   | -0,102100538 | 0,302372077 |  |
| 217249_x_at  | -               | 4,959281929  | 4,656929558  | 0,302352371 |  |
| 222228_s_at  | ALKBH4          | 1,119359127  | 0,817300337  | 0,302058791 |  |
| 222682_s_at  | FAM114A2        | 2,201862497  | 1,899812471  | 0,302050026 |  |
| 205407_at    | RECK            | 2,41290634   | 2,110887591  | 0,302018749 |  |
| 230737_s_at  | LOC387647       | 0,695652136  | 0,393761504  | 0,301890632 |  |
| 242273_at    | -               | 0,695652136  | 0,393761504  | 0,301890632 |  |
| 1556669_a_at | -               | -0,234278768 | -0,536087151 | 0,301808383 |  |
| 212823_s_at  | PLEKHG3         | -0,234278768 | -0,536087151 | 0,301808383 |  |
| 222890_at    | CCDC113         | -0,234278768 | -0,536087151 | 0,301808383 |  |
| 227136_s_at  | C10orf46        | -0,234278768 | -0,536087151 | 0,301808383 |  |
| 228958_at    | ZNF19           | -0,234278768 | -0,536087151 | 0,301808383 |  |
| 208382_s_at  | DMC1            | 0,255492549  | -0,046302147 | 0,301794696 |  |
| 211588_s_at  | PML             | 0,255492549  | -0,046302147 | 0,301794696 |  |
| 214036_at    | EFNA5           | 0,255492549  | -0,046302147 | 0,301794696 |  |
| 1553053_at   | LINC00521       | -1,240169874 | -1,541908042 | 0,301738168 |  |
| 1553465_a_at | CES5A           | -1,240169874 | -1,541908042 | 0,301738168 |  |
| 1565612_at   | DYNLRB1         | -1,240169874 | -1,541908042 | 0,301738168 |  |
| 203070_at    | SEMA3B          | -1,240169874 | -1,541908042 | 0,301738168 |  |
| 206084_at    | PTPRR           | -1,240169874 | -1,541908042 | 0,301738168 |  |
| 219925_at    | ZMYM6           | -1,240169874 | -1,541908042 | 0,301738168 |  |
| 221015_s_at  | CDADC1          | -1,240169874 | -1,541908042 | 0,301738168 |  |
| 223646_s_at  | TXLNG2P         | -1,240169874 | -1,541908042 | 0,301738168 |  |
| 224239_at    | DEFB103A /// DE | -1,240169874 | -1,541908042 | 0,301738168 |  |
| 228591_at    | TNRC6C          | -1,240169874 | -1,541908042 | 0,301738168 |  |
| 230478_at    | OIT3            | -1,240169874 | -1,541908042 | 0,301738168 |  |
| 233022_at    | TRPM3           | -1,240169874 | -1,541908042 | 0,301738168 |  |
| 235672_at    | MAP6            | -1,240169874 | -1,541908042 | 0,301738168 |  |
| 238360_s_at  | LOC100505576    | -1,240169874 | -1,541908042 | 0,301738168 |  |
| 209338_at    | TFCP2           | 2,724770722  | 2,423075926  | 0,301694796 |  |
| 37232_at     | KIAA0586        | 1,163336153  | 0,86173571   | 0,301600443 |  |
| 239441_at    | ZNF780A         | 0,97328325   | 0,67181667   | 0,30146658  |  |
| 223431_at    | CNO             | 3,164152611  | 2,862725455  | 0,301427156 |  |
| 1556026_at   | LOC100131434    | -2,972500237 | -3,273861381 | 0,301361145 |  |
| 214282_at    | -               | -2,972500237 | -3,273861381 | 0,301361145 |  |
| 238695_s_at  | RAB39B          | -2,972500237 | -3,273861381 | 0,301361145 |  |
| 244773_at    | -               | -2,972500237 | -3,273861381 | 0,301361145 |  |

|              |              |              |              |             |  |
|--------------|--------------|--------------|--------------|-------------|--|
| 202602_s_at  | HTATSF1      | 4,008926642  | 3,707626508  | 0,301300133 |  |
| 234975_at    | GSPT1        | 0,30867765   | 0,007421914  | 0,301255736 |  |
| 1553048_a_at | PIP4K2B      | 1,381753566  | 1,080561626  | 0,301191941 |  |
| 221257_x_at  | FBXO38       | 2,943717636  | 2,64270545   | 0,301012186 |  |
| 212245_at    | MCFD2        | 4,446258267  | 4,145254615  | 0,301003652 |  |
| 1560059_at   | VPS37C       | -0,089689931 | -0,39061235  | 0,300922419 |  |
| 209327_s_at  | NOP16        | -0,089689931 | -0,39061235  | 0,300922419 |  |
| 215233_at    | JMJD6        | -0,089689931 | -0,39061235  | 0,300922419 |  |
| 215827_x_at  | CROCCP3      | -0,089689931 | -0,39061235  | 0,300922419 |  |
| 223806_s_at  | NAPSA        | -0,089689931 | -0,39061235  | 0,300922419 |  |
| 227781_x_at  | FAM57B       | -0,089689931 | -0,39061235  | 0,300922419 |  |
| 236784_s_at  | -            | -0,089689931 | -0,39061235  | 0,300922419 |  |
| 243900_at    | WDR38        | -0,089689931 | -0,39061235  | 0,300922419 |  |
| 224684_at    | SNX12        | 3,316904202  | 3,016072743  | 0,300831458 |  |
| 206275_s_at  | MICAL2       | 0,359971644  | 0,059218869  | 0,300752775 |  |
| 214969_at    | MAP3K9       | 0,359971644  | 0,059218869  | 0,300752775 |  |
| 225395_s_at  | FAM120AOS    | 3,497632487  | 3,196911138  | 0,300721349 |  |
| 231780_at    | GBGT1        | 3,111496958  | 2,810785576  | 0,300711382 |  |
| 1552590_a_at | ABCC12       | -2,479842156 | -2,780313924 | 0,300471768 |  |
| 1560714_at   | FLJ37035     | -2,479842156 | -2,780313924 | 0,300471768 |  |
| 1561654_at   | -            | -2,479842156 | -2,780313924 | 0,300471768 |  |
| 1561690_at   | -            | -2,479842156 | -2,780313924 | 0,300471768 |  |
| 1563475_s_at | METTL20      | -2,479842156 | -2,780313924 | 0,300471768 |  |
| 1564662_at   | ZNF852       | -2,479842156 | -2,780313924 | 0,300471768 |  |
| 1569100_a_at | -            | -2,479842156 | -2,780313924 | 0,300471768 |  |
| 1569410_at   | FLG2         | -2,479842156 | -2,780313924 | 0,300471768 |  |
| 204941_s_at  | ALDH3B2      | -2,479842156 | -2,780313924 | 0,300471768 |  |
| 216045_at    | CCDC144A     | -2,479842156 | -2,780313924 | 0,300471768 |  |
| 216612_x_at  | -            | -2,479842156 | -2,780313924 | 0,300471768 |  |
| 231703_s_at  | ADH4         | -2,479842156 | -2,780313924 | 0,300471768 |  |
| 233397_at    | -            | -2,479842156 | -2,780313924 | 0,300471768 |  |
| 236597_at    | UGT3A1       | -2,479842156 | -2,780313924 | 0,300471768 |  |
| 241404_at    | -            | -2,479842156 | -2,780313924 | 0,300471768 |  |
| 242163_at    | THRAP3       | -2,479842156 | -2,780313924 | 0,300471768 |  |
| 203287_at    | LAD1         | -0,022466681 | -0,322870281 | 0,3004036   |  |
| 207868_at    | CHRNA2       | -0,022466681 | -0,322870281 | 0,3004036   |  |
| 215234_at    | -            | -0,022466681 | -0,322870281 | 0,3004036   |  |
| 219830_at    | RAI1         | -0,022466681 | -0,322870281 | 0,3004036   |  |
| 234977_at    | ZADH2        | -0,022466681 | -0,322870281 | 0,3004036   |  |
| 202811_at    | STAMPB       | 3,702775533  | 3,402394519  | 0,300381014 |  |
| 209330_s_at  | HNRNPD       | 5,394467196  | 5,094094626  | 0,30037257  |  |
| 218017_s_at  | HGSNAT       | 2,478200152  | 2,17802703   | 0,300173122 |  |
| 37566_at     | KIAA1045     | -2,377296877 | -2,677460985 | 0,300164109 |  |
| 201679_at    | SRRT         | 1,314003737  | 1,013870809  | 0,300132928 |  |
| 230379_x_at  | C2orf56      | 1,339784194  | 1,039887232  | 0,299896963 |  |
| 1558784_at   | LOC100133089 | 1,523472489  | 1,223626587  | 0,299845902 |  |
| 205127_at    | PTGS1        | 0,457392764  | 0,157549243  | 0,299843521 |  |
| 209105_at    | NCOA1        | 0,457392764  | 0,157549243  | 0,299843521 |  |
| 212134_at    | PHLDB1       | 0,457392764  | 0,157549243  | 0,299843521 |  |
| 230108_at    | ERCC6        | 0,457392764  | 0,157549243  | 0,299843521 |  |
| 204496_at    | STRN3        | 4,232392431  | 3,932593347  | 0,299799084 |  |
| 228191_at    | FLVCR1       | 3,179700672  | 2,880111483  | 0,299589189 |  |
| 201477_s_at  | RRM1         | 5,482445879  | 5,182875656  | 0,299570224 |  |
| 213264_at    | PCBP2        | 1,649074067  | 1,349621332  | 0,299452735 |  |
| 205540_s_at  | RRAGB        | 1,390002893  | 1,090553537  | 0,299449356 |  |
| 235618_at    | ZNF507       | 1,390002893  | 1,090553537  | 0,299449356 |  |

|              |                  |              |              |             |  |
|--------------|------------------|--------------|--------------|-------------|--|
| 1552717_s_at | CEP170 /// CEP1  | 0,503742507  | 0,204310755  | 0,299431752 |  |
| 1562484_at   | C17orf104        | 0,503742507  | 0,204310755  | 0,299431752 |  |
| 204360_s_at  | NAGLU            | 0,503742507  | 0,204310755  | 0,299431752 |  |
| 237386_at    | -                | 0,503742507  | 0,204310755  | 0,299431752 |  |
| 1555837_s_at | POLR2B           | 6,74745965   | 6,448050962  | 0,299408688 |  |
| 226508_at    | PHC3             | 3,279650757  | 2,980244813  | 0,299405945 |  |
| 1556429_a_at | WDR67            | 0,103263601  | -0,19610998  | 0,299373581 |  |
| 222112_at    | EPS15L1          | 0,103263601  | -0,19610998  | 0,299373581 |  |
| 243883_at    | MMP15            | 0,103263601  | -0,19610998  | 0,299373581 |  |
| 244504_x_at  | ARF1 /// MIR3620 | 0,103263601  | -0,19610998  | 0,299373581 |  |
| 228717_at    | -                | 1,104397092  | 0,805216064  | 0,299181028 |  |
| 222958_s_at  | DEPDC1           | 3,154500615  | 2,855418981  | 0,299081635 |  |
| 1568619_s_at | ITPRIPL2         | 1,709647566  | 1,410714371  | 0,298933194 |  |
| 218772_x_at  | TMEM38B          | 3,957816838  | 3,658934427  | 0,298882411 |  |
| 225539_at    | ZNF295           | 3,120200849  | 2,821324225  | 0,298876624 |  |
| 236834_at    | SCFD2            | 0,888485433  | 0,589657387  | 0,298828047 |  |
| 202127_at    | PRPF4B           | 3,517535002  | 3,218713651  | 0,298821351 |  |
| 232122_s_at  | VEPH1            | 1,163336153  | 0,864649967  | 0,298686186 |  |
| 226376_at    | UNK              | 0,592200562  | 0,293518836  | 0,298681726 |  |
| 215492_x_at  | PTCRA            | 1,593009234  | 1,294497133  | 0,298512101 |  |
| 219189_at    | FBXL6            | 1,191926657  | 0,893473268  | 0,298453389 |  |
| 1554987_at   | GOLGA3           | -0,467091869 | -0,765504029 | 0,29841216  |  |
| 210452_x_at  | CYP4F2 /// CYP4  | -0,467091869 | -0,765504029 | 0,29841216  |  |
| 210497_x_at  | SSX2 /// SSX2B   | -0,467091869 | -0,765504029 | 0,29841216  |  |
| 215511_at    | TCF20            | -0,467091869 | -0,765504029 | 0,29841216  |  |
| 221155_x_at  | -                | -0,467091869 | -0,765504029 | 0,29841216  |  |
| 200993_at    | IPO7             | 4,412743794  | 4,114368048  | 0,298375746 |  |
| 224959_at    | SLC26A2          | 4,60394751   | 4,305575871  | 0,298371639 |  |
| 1553234_at   | ADAMTS18         | -1,196375121 | -1,494668682 | 0,29829356  |  |
| 1555804_a_at | YSK4             | -1,196375121 | -1,494668682 | 0,29829356  |  |
| 1559292_s_at | LINC00032        | -1,196375121 | -1,494668682 | 0,29829356  |  |
| 1559355_at   | NXPH2            | -1,196375121 | -1,494668682 | 0,29829356  |  |
| 1564679_at   | ASB15            | -1,196375121 | -1,494668682 | 0,29829356  |  |
| 206713_at    | NTNG1            | -1,196375121 | -1,494668682 | 0,29829356  |  |
| 206720_at    | MGAT5            | -1,196375121 | -1,494668682 | 0,29829356  |  |
| 213280_at    | RAP1GAP2         | -1,196375121 | -1,494668682 | 0,29829356  |  |
| 214691_x_at  | FAM63B           | -1,196375121 | -1,494668682 | 0,29829356  |  |
| 215102_at    | DPY19L1P1        | -1,196375121 | -1,494668682 | 0,29829356  |  |
| 228421_s_at  | EFEMP1           | -1,196375121 | -1,494668682 | 0,29829356  |  |
| 229110_at    | SLC24A2          | -1,196375121 | -1,494668682 | 0,29829356  |  |
| 233117_at    | MAPT             | -1,196375121 | -1,494668682 | 0,29829356  |  |
| 241337_at    | -                | -1,196375121 | -1,494668682 | 0,29829356  |  |
| 242833_at    | -                | -1,196375121 | -1,494668682 | 0,29829356  |  |
| 243238_at    | PYGB             | -1,196375121 | -1,494668682 | 0,29829356  |  |
| 243598_at    | -                | -1,196375121 | -1,494668682 | 0,29829356  |  |
| 214960_at    | API5             | 1,442503549  | 1,144305291  | 0,298198258 |  |
| 239888_at    | -                | 0,67554678   | 0,377530647  | 0,298016133 |  |
| 210169_at    | SEC14L5          | 1,46610492   | 1,16809119   | 0,29801373  |  |
| 237404_at    | -                | 0,273439642  | -0,024572586 | 0,298012228 |  |
| 228760_at    | SRSF8            | 3,62627949   | 3,32832922   | 0,29795027  |  |
| 57516_at     | ZNF764           | 1,139070151  | 0,841169397  | 0,297900754 |  |
| 34063_at     | RECQL5           | -0,539157504 | -0,837050727 | 0,297893223 |  |
| 226361_at    | TMEM42           | 1,274448124  | 0,976641161  | 0,297806963 |  |
| 215012_at    | ZNF451           | 1,021868205  | 0,724100169  | 0,297768036 |  |
| 219999_at    | MAN2A2           | 1,021868205  | 0,724100169  | 0,297768036 |  |
| 204549_at    | IKBKE            | 0,715481152  | 0,417770464  | 0,297710688 |  |

|              |                 |              |              |             |  |
|--------------|-----------------|--------------|--------------|-------------|--|
| 224894_at    | YAP1            | 0,715481152  | 0,417770464  | 0,297710688 |  |
| 238142_at    | -               | 0,715481152  | 0,417770464  | 0,297710688 |  |
| 1567912_s_at | CT45A1 /// CT45 | -3,013665402 | -3,311072652 | 0,29740725  |  |
| 212653_s_at  | EHBP1           | 3,308224834  | 3,010820719  | 0,297404115 |  |
| 244030_at    | STYX            | 2,64946283   | 2,352169913  | 0,297292917 |  |
| 1569775_at   | RNF157          | 0,376672223  | 0,079428135  | 0,297244088 |  |
| 210200_at    | WWP2            | 0,376672223  | 0,079428135  | 0,297244088 |  |
| 212705_x_at  | PNPLA2          | 0,376672223  | 0,079428135  | 0,297244088 |  |
| 226902_at    | USP13           | 0,376672223  | 0,079428135  | 0,297244088 |  |
| 232774_x_at  | ZIK1            | 0,376672223  | 0,079428135  | 0,297244088 |  |
| 232866_at    | ZSCAN18         | 0,376672223  | 0,079428135  | 0,297244088 |  |
| 202577_s_at  | DDX19A          | 2,277177578  | 1,979940779  | 0,2972368   |  |
| 1555523_a_at | FYCO1           | 0,792179257  | 0,495031851  | 0,297147406 |  |
| 216385_at    | LOC220077       | 0,792179257  | 0,495031851  | 0,297147406 |  |
| 211569_s_at  | HADH            | 1,946200473  | 1,64909809   | 0,297102382 |  |
| 209357_at    | CITED2          | 4,758484959  | 4,461446286  | 0,297038673 |  |
| 218957_s_at  | PAAF1           | 2,922548342  | 2,625627364  | 0,296920978 |  |
| 207458_at    | RHPN1-AS1       | 0,82905153   | 0,532164371  | 0,29688716  |  |
| 212419_at    | ZCCHC24         | 1,621313976  | 1,324440845  | 0,296873131 |  |
| 228351_at    | HEATR1          | 2,621710292  | 2,324919719  | 0,296790573 |  |
| 204433_s_at  | SPATA2          | 2,342392905  | 2,045615873  | 0,296777032 |  |
| 210986_s_at  | TPM1            | 4,622007457  | 4,32527877   | 0,296728687 |  |
| 202058_s_at  | KPNA1           | 2,794789337  | 2,498185745  | 0,296603593 |  |
| 205609_at    | ANGPT1          | 4,447740857  | 4,151234028  | 0,296506829 |  |
| 225431_x_at  | PM20D2          | 3,102740237  | 2,806245339  | 0,296494898 |  |
| 201923_at    | PRDX4           | 6,578365491  | 6,281882154  | 0,296483338 |  |
| 223239_at    | C14orf129       | 4,312693778  | 4,016221008  | 0,29647277  |  |
| 1552573_s_at | MIPOL1          | 0,900083947  | 0,603679647  | 0,296404301 |  |
| 218424_s_at  | STEAP3          | 2,462640593  | 2,166264721  | 0,296375872 |  |
| 219371_s_at  | KLF2            | 2,132266459  | 1,835911187  | 0,296355273 |  |
| 225178_at    | TTC14           | 0,518867317  | 0,222599095  | 0,296268222 |  |
| 230063_at    | ZNF264          | 1,496984567  | 1,200746069  | 0,296238498 |  |
| 227815_at    | -               | 2,294858597  | 1,998633167  | 0,29622543  |  |
| 226345_at    | ARL5B           | 4,236401075  | 3,940211012  | 0,296190062 |  |
| 222738_at    | CLDN22 /// WW   | 0,934330293  | 0,638150376  | 0,296179916 |  |
| 235192_at    | TP53RK          | 2,014487247  | 1,718396606  | 0,296090641 |  |
| 1557172_x_at | NEK8            | 1,283332461  | 0,987376598  | 0,295955863 |  |
| 215182_x_at  | -               | 1,296557217  | 1,000684521  | 0,295872696 |  |
| 203732_at    | TRIP4           | 3,45992606   | 3,164168347  | 0,295757713 |  |
| 1553297_a_at | CSF3R           | 0,606430281  | 0,310717132  | 0,295713149 |  |
| 1553898_a_at | DKFZp434L192    | -2,551294263 | -2,847001814 | 0,295707551 |  |
| 1554163_at   | TWIST2          | -2,551294263 | -2,847001814 | 0,295707551 |  |
| 1559393_at   | ALDH1L2         | -2,551294263 | -2,847001814 | 0,295707551 |  |
| 1565769_at   | -               | -2,551294263 | -2,847001814 | 0,295707551 |  |
| 1568805_at   | NCOA7           | -2,551294263 | -2,847001814 | 0,295707551 |  |
| 1570364_at   | ZNF709          | -2,551294263 | -2,847001814 | 0,295707551 |  |
| 204719_at    | ABCA8           | -2,551294263 | -2,847001814 | 0,295707551 |  |
| 206765_at    | KCNJ2           | -2,551294263 | -2,847001814 | 0,295707551 |  |
| 209990_s_at  | GABBR2          | -2,551294263 | -2,847001814 | 0,295707551 |  |
| 232961_at    | SPATS2L         | -2,551294263 | -2,847001814 | 0,295707551 |  |
| 237933_at    | -               | -2,551294263 | -2,847001814 | 0,295707551 |  |
| 239292_at    | -               | -2,551294263 | -2,847001814 | 0,295707551 |  |
| 240591_at    | -               | -2,551294263 | -2,847001814 | 0,295707551 |  |
| 240741_x_at  | -               | -2,551294263 | -2,847001814 | 0,295707551 |  |
| 241593_x_at  | -               | -2,551294263 | -2,847001814 | 0,295707551 |  |
| 211985_s_at  | CALM1 /// CALM  | 3,81731168   | 3,521663705  | 0,295647975 |  |

|             |                 |              |              |             |  |
|-------------|-----------------|--------------|--------------|-------------|--|
| 205226_at   | PDGFRL          | 1,360921491  | 1,065442793  | 0,295478698 |  |
| 223497_at   | FAM135A         | 2,348755185  | 2,053299695  | 0,29545549  |  |
| 204956_at   | MTAP            | 1,063722698  | 0,768343791  | 0,295378907 |  |
| 225644_at   | CCDC117         | 4,049200824  | 3,753943043  | 0,29525778  |  |
| 203312_x_at | ARF6            | 4,457095376  | 4,161934914  | 0,295160462 |  |
| 217445_s_at | GART            | 2,979690938  | 2,684536601  | 0,295154337 |  |
| 200603_at   | PRKAR1A         | 5,512273061  | 5,217197809  | 0,295075252 |  |
| 57703_at    | SENP5           | 1,756658382  | 1,461646549  | 0,295011833 |  |
| 225401_at   | C1orf85         | 2,194816625  | 1,899812471  | 0,295004154 |  |
| 235505_s_at | LRPAP1          | 0,728550685  | 0,433557298  | 0,294993387 |  |
| 227548_at   | ORMDL1          | 1,820612054  | 1,525647381  | 0,294964673 |  |
| 219043_s_at | LOC285359 /// P | 4,373240364  | 4,078419261  | 0,294821103 |  |
| 206589_at   | GFI1            | -0,655928373 | -0,950686014 | 0,294757641 |  |
| 225442_at   | DDR2            | -0,655928373 | -0,950686014 | 0,294757641 |  |
| 233812_at   | LINC00028       | -0,655928373 | -0,950686014 | 0,294757641 |  |
| 237894_at   | C3orf22         | -0,655928373 | -0,950686014 | 0,294757641 |  |
| 219787_s_at | ECT2            | 3,243687542  | 2,949006836  | 0,294680706 |  |
| 226897_s_at | ZC3H7A          | 1,874520207  | 1,579853228  | 0,294666978 |  |
| 209555_s_at | CD36            | 4,859592153  | 4,564962102  | 0,29463005  |  |
| 202498_s_at | SLC2A3          | 4,632475172  | 4,337916639  | 0,294558533 |  |
| 201777_s_at | KIAA0494        | 1,672933557  | 1,378453643  | 0,294479913 |  |
| 215108_x_at | TOX3            | -3,212234735 | -3,506469152 | 0,294234418 |  |
| 205066_s_at | ENPP1           | -0,196756757 | -0,490927335 | 0,294170578 |  |
| 206394_at   | MYBPC2          | -0,196756757 | -0,490927335 | 0,294170578 |  |
| 210828_s_at | ARNT            | -0,196756757 | -0,490927335 | 0,294170578 |  |
| 211175_at   | GPR45           | -0,196756757 | -0,490927335 | 0,294170578 |  |
| 212935_at   | MCF2L           | -0,196756757 | -0,490927335 | 0,294170578 |  |
| 215910_s_at | FNDC3A          | -0,196756757 | -0,490927335 | 0,294170578 |  |
| 230980_x_at | -               | -0,196756757 | -0,490927335 | 0,294170578 |  |
| 241062_at   | -               | -0,196756757 | -0,490927335 | 0,294170578 |  |
| 244088_at   | -               | -0,196756757 | -0,490927335 | 0,294170578 |  |
| 244385_at   | KDM4C           | -0,196756757 | -0,490927335 | 0,294170578 |  |
| 217092_x_at | -               | 5,828105858  | 5,533999386  | 0,294106472 |  |
| 1559806_at  | -               | -0,055687482 | -0,34958478  | 0,293897298 |  |
| 229284_at   | MAT2B           | -0,055687482 | -0,34958478  | 0,293897298 |  |
| 235163_at   | MOB3A           | -0,055687482 | -0,34958478  | 0,293897298 |  |
| 228069_at   | FAM54A          | 4,54260042   | 4,248708657  | 0,293891762 |  |
| 209726_at   | CA11            | -0,352951799 | -0,646746079 | 0,29379428  |  |
| 210642_at   | CCIN            | -0,352951799 | -0,646746079 | 0,29379428  |  |
| 235664_at   | -               | -0,352951799 | -0,646746079 | 0,29379428  |  |
| 241746_at   | CUL7            | -0,352951799 | -0,646746079 | 0,29379428  |  |
| 238778_at   | MPP7            | 1,530951994  | 1,23718272   | 0,293769274 |  |
| 202657_s_at | SERTAD2         | 2,159061673  | 1,865308541  | 0,293753132 |  |
| 213826_s_at | H3F3A           | 1,187200746  | 0,893473268  | 0,293727478 |  |
| 216503_s_at | MLLT10          | 1,187200746  | 0,893473268  | 0,293727478 |  |
| 219474_at   | C3orf52         | 1,215326747  | 0,921731975  | 0,293594772 |  |
| 212812_at   | SERINC5         | 2,201862497  | 1,908311039  | 0,293551457 |  |
| 1569192_at  | -               | -3,054236653 | -3,347710726 | 0,293474073 |  |
| 240292_x_at | ANKS1B          | -3,054236653 | -3,347710726 | 0,293474073 |  |
| 241306_at   | -               | -3,054236653 | -3,347710726 | 0,293474073 |  |
| 228843_at   | ARL10           | 2,987866617  | 2,694398145  | 0,293468472 |  |
| 214378_at   | TFPI            | 0,072842263  | -0,220592223 | 0,293434486 |  |
| 230750_at   | -               | 0,072842263  | -0,220592223 | 0,293434486 |  |
| 236483_at   | -               | 0,072842263  | -0,220592223 | 0,293434486 |  |
| 217842_at   | LUC7L2          | 4,188728817  | 3,895315489  | 0,293413328 |  |
| 228710_at   | -               | 2,819431021  | 2,526063925  | 0,293367096 |  |

|              |                 |              |              |             |  |
|--------------|-----------------|--------------|--------------|-------------|--|
| 1566823_a_at | -               | -0,926850548 | -1,220210588 | 0,293360039 |  |
| 1570503_at   | -               | -0,926850548 | -1,220210588 | 0,293360039 |  |
| 204898_at    | SAP30           | -0,926850548 | -1,220210588 | 0,293360039 |  |
| 211089_s_at  | NEK3            | -0,926850548 | -1,220210588 | 0,293360039 |  |
| 216485_s_at  | TPSAB1          | -0,926850548 | -1,220210588 | 0,293360039 |  |
| 222828_at    | IL20RA          | -0,926850548 | -1,220210588 | 0,293360039 |  |
| 230218_at    | HIC1            | -0,926850548 | -1,220210588 | 0,293360039 |  |
| 235597_s_at  | RGPD1 /// RGPD  | -0,926850548 | -1,220210588 | 0,293360039 |  |
| 236954_at    | BOLL            | -0,926850548 | -1,220210588 | 0,293360039 |  |
| 238132_at    | LOC100505669 /  | -0,926850548 | -1,220210588 | 0,293360039 |  |
| 238641_at    | C1orf126        | -0,926850548 | -1,220210588 | 0,293360039 |  |
| 241229_at    | -               | -0,926850548 | -1,220210588 | 0,293360039 |  |
| 241325_at    | LOC100507408    | -0,926850548 | -1,220210588 | 0,293360039 |  |
| 217987_at    | ASNSD1          | 4,933763998  | 4,640445173  | 0,293318826 |  |
| 212969_x_at  | EML3            | 0,810733188  | 0,51742585   | 0,293307337 |  |
| 1553678_a_at | ITGB1           | 4,431847465  | 4,138648509  | 0,293198955 |  |
| 1559840_s_at | TBX18           | -0,43775896  | -0,730778808 | 0,293019848 |  |
| 203742_s_at  | LOC732360 /// T | 2,11992033   | 1,826973888  | 0,292946442 |  |
| 222543_at    | DERL1           | 4,97067094   | 4,677791538  | 0,292879401 |  |
| 202193_at    | LIMK2           | 0,917308734  | 0,624460759  | 0,292847975 |  |
| 213100_at    | UNC5B           | 0,917308734  | 0,624460759  | 0,292847975 |  |
| 243606_at    | NXPE3           | 0,917308734  | 0,624460759  | 0,292847975 |  |
| 225333_at    | ZNF496          | 0,246434561  | -0,046302147 | 0,292736708 |  |
| 203177_x_at  | TFAM            | 3,579258128  | 3,28656411   | 0,292694018 |  |
| 1554413_s_at | SNX29P1 /// SNX | -2,597496523 | -2,89013181  | 0,292635287 |  |
| 1554922_at   | ZNF678          | -2,597496523 | -2,89013181  | 0,292635287 |  |
| 1557890_at   | STXBP5-AS1      | -2,597496523 | -2,89013181  | 0,292635287 |  |
| 1558963_at   | -               | -2,597496523 | -2,89013181  | 0,292635287 |  |
| 1560464_at   | TSPAN10         | -2,597496523 | -2,89013181  | 0,292635287 |  |
| 1562209_at   | DCAF4L1         | -2,597496523 | -2,89013181  | 0,292635287 |  |
| 1564285_at   | HFM1            | -2,597496523 | -2,89013181  | 0,292635287 |  |
| 1568920_at   | -               | -2,597496523 | -2,89013181  | 0,292635287 |  |
| 216459_x_at  | DDR1-AS1        | -2,597496523 | -2,89013181  | 0,292635287 |  |
| 241440_at    | ZIC1            | -2,597496523 | -2,89013181  | 0,292635287 |  |
| 242135_at    | LOC100509302    | -2,597496523 | -2,89013181  | 0,292635287 |  |
| 242964_at    | -               | -2,597496523 | -2,89013181  | 0,292635287 |  |
| 238465_at    | SETD9           | 2,691784869  | 2,39915583   | 0,292629039 |  |
| 217693_x_at  | MAGOH2          | 1,64218396   | 1,349621332  | 0,292562628 |  |
| 208456_s_at  | RRAS2           | 2,943717636  | 2,651169275  | 0,292548361 |  |
| 212410_at    | EFHA1           | 4,758484959  | 4,466010984  | 0,292473975 |  |
| 205510_s_at  | FLJ10038        | 0,351548291  | 0,059218869  | 0,292329422 |  |
| 1553954_at   | ALG14           | 1,515954005  | 1,223626587  | 0,292327418 |  |
| 217416_x_at  | -               | 2,151803104  | 1,859476797  | 0,292326307 |  |
| 1553675_at   | KLC4            | -1,131062212 | -1,423348341 | 0,292286129 |  |
| 1554443_s_at | BEST1           | -1,131062212 | -1,423348341 | 0,292286129 |  |
| 1556657_at   | -               | -1,131062212 | -1,423348341 | 0,292286129 |  |
| 1557727_at   | PCBP1-AS1       | -1,131062212 | -1,423348341 | 0,292286129 |  |
| 1558398_at   | ANKRD24         | -1,131062212 | -1,423348341 | 0,292286129 |  |
| 1562282_at   | ZNF568          | -1,131062212 | -1,423348341 | 0,292286129 |  |
| 204358_s_at  | FLRT2 /// LOC10 | -1,131062212 | -1,423348341 | 0,292286129 |  |
| 207510_at    | BDKRB1          | -1,131062212 | -1,423348341 | 0,292286129 |  |
| 223779_at    | AFAP1-AS1       | -1,131062212 | -1,423348341 | 0,292286129 |  |
| 224531_at    | GPR61           | -1,131062212 | -1,423348341 | 0,292286129 |  |
| 230284_at    | MYOM3           | -1,131062212 | -1,423348341 | 0,292286129 |  |
| 230586_s_at  | -               | -1,131062212 | -1,423348341 | 0,292286129 |  |
| 233272_at    | -               | -1,131062212 | -1,423348341 | 0,292286129 |  |

|              |                 |              |              |             |  |
|--------------|-----------------|--------------|--------------|-------------|--|
| 236400_at    | IDH1-AS1        | -1,131062212 | -1,423348341 | 0,292286129 |  |
| 239475_at    | ACPL2           | -1,131062212 | -1,423348341 | 0,292286129 |  |
| 217364_x_at  | -               | 1,722769813  | 1,43051703   | 0,292252783 |  |
| 200080_s_at  | H3F3A /// H3F3A | 7,375162476  | 7,082929608  | 0,292232869 |  |
| 1564431_a_at | LCNL1           | 0,401366113  | 0,109221392  | 0,292144721 |  |
| 232500_at    | RALGAPA2        | 0,401366113  | 0,109221392  | 0,292144721 |  |
| 213104_at    | TSR3            | 2,250242994  | 1,958277216  | 0,291965778 |  |
| 212215_at    | PREPL           | 3,420201053  | 3,128242026  | 0,291959026 |  |
| 244768_at    | DYNC1H1         | 0,496120222  | 0,204310755  | 0,291809467 |  |
| 203826_s_at  | PITPNM1         | 1,224581536  | 0,932882274  | 0,291699262 |  |
| 218568_at    | AGK             | 3,391728033  | 3,100079607  | 0,291648427 |  |
| 1563646_a_at | TMEM67          | 1,251994932  | 0,960386719  | 0,291608213 |  |
| 212246_at    | MCFD2           | 3,067171967  | 2,775606361  | 0,291565606 |  |
| 225117_at    | KANSL1          | 3,667581479  | 3,376085218  | 0,291496262 |  |
| 228730_s_at  | SCRN2           | 1,292162421  | 1,000684521  | 0,2914779   |  |
| 203731_s_at  | ZKSCAN5         | 1,305306849  | 1,013870809  | 0,29143604  |  |
| 210048_at    | NAPG            | 1,305306849  | 1,013870809  | 0,29143604  |  |
| 213936_x_at  | SFTPB           | 1,305306849  | 1,013870809  | 0,29143604  |  |
| 243147_x_at  | -               | 2,127340679  | 1,835911187  | 0,291429492 |  |
| 234512_x_at  | -               | 6,277510259  | 5,986125033  | 0,291385226 |  |
| 227593_at    | FLJ37453        | 1,331241794  | 1,039887232  | 0,291354562 |  |
| 212918_at    | RECQL           | 3,356380711  | 3,065035915  | 0,291344796 |  |
| 1556001_at   | LOC284939 /// M | 1,607231019  | 1,315948728  | 0,291282291 |  |
| 223391_at    | SGPP1           | 3,794188277  | 3,503081281  | 0,291106996 |  |
| 217820_s_at  | ENAH            | 3,054253462  | 2,763166224  | 0,291087238 |  |
| 1563577_at   | -               | 0,747935635  | 0,456918297  | 0,291017338 |  |
| 212638_s_at  | WWP1            | 2,700102307  | 2,409170778  | 0,290931529 |  |
| 1555270_a_at | WFS1            | -0,759588698 | -1,050406615 | 0,290817917 |  |
| 1557373_at   | LOC339505       | -0,759588698 | -1,050406615 | 0,290817917 |  |
| 1557628_s_at | LOC283745       | -0,759588698 | -1,050406615 | 0,290817917 |  |
| 1562433_at   | FLJ10489        | -0,759588698 | -1,050406615 | 0,290817917 |  |
| 205463_s_at  | PDGFA           | -0,759588698 | -1,050406615 | 0,290817917 |  |
| 215251_at    | -               | -0,759588698 | -1,050406615 | 0,290817917 |  |
| 228712_at    | WNK1            | -0,759588698 | -1,050406615 | 0,290817917 |  |
| 232900_at    | HERC2P7         | -0,759588698 | -1,050406615 | 0,290817917 |  |
| 232948_at    | -               | -0,759588698 | -1,050406615 | 0,290817917 |  |
| 233582_at    | -               | -0,759588698 | -1,050406615 | 0,290817917 |  |
| 240358_at    | -               | -0,759588698 | -1,050406615 | 0,290817917 |  |
| 243219_x_at  | MRPL50          | -0,759588698 | -1,050406615 | 0,290817917 |  |
| 244041_at    | STX6            | -0,759588698 | -1,050406615 | 0,290817917 |  |
| 202898_at    | SDC3            | 0,822971223  | 0,532164371  | 0,290806853 |  |
| 212471_at    | AVL9            | 0,928678725  | 0,638150376  | 0,290528348 |  |
| 217230_at    | EZR             | 0,928678725  | 0,638150376  | 0,290528348 |  |
| 212996_s_at  | URB1            | 2,102456302  | 1,811954245  | 0,290502057 |  |
| 204645_at    | CCNT2           | 2,310153708  | 2,019703483  | 0,290450225 |  |
| 203532_x_at  | CUL5            | 0,962260738  | 0,67181667   | 0,290444068 |  |
| 236044_at    | PPAPDC1A        | 3,474545391  | 3,184136378  | 0,290409013 |  |
| 233085_s_at  | NABP1           | 2,503131904  | 2,212749286  | 0,290382618 |  |
| 218265_at    | SECISBP2        | 0,995078803  | 0,704715219  | 0,290363584 |  |
| 229721_x_at  | DERL3           | 0,995078803  | 0,704715219  | 0,290363584 |  |
| 229969_at    | SEC63           | 0,995078803  | 0,704715219  | 0,290363584 |  |
| 243259_at    | ATXN7           | 0,995078803  | 0,704715219  | 0,290363584 |  |
| 225378_at    | VPS37A          | 3,348994562  | 3,058687544  | 0,290307018 |  |
| 212058_at    | U2SURP          | 5,366783278  | 5,076606343  | 0,290176935 |  |
| 204093_at    | CCNH            | 4,476108798  | 4,186016868  | 0,29009193  |  |
| 208745_at    | ATP5L           | 4,148572682  | 3,858511405  | 0,290061277 |  |



|              |           |              |              |             |  |
|--------------|-----------|--------------|--------------|-------------|--|
| 200870_at    | STRAP     | 5,530344319  | 5,240381972  | 0,289962347 |  |
| 203138_at    | HAT1      | 5,443592265  | 5,153686264  | 0,289906    |  |
| 202863_at    | SP100     | 2,178241192  | 1,888402606  | 0,289838586 |  |
| 212528_at    | DESI1     | 1,982112682  | 1,692388143  | 0,28972454  |  |
| 238793_at    | TIGD7     | 1,982112682  | 1,692388143  | 0,28972454  |  |
| 219492_at    | CHIC2     | 3,551027544  | 3,261354437  | 0,289673107 |  |
| 225479_at    | LRRC58    | 3,801937331  | 3,512402411  | 0,28953492  |  |
| 1568780_at   | -         | -0,622910612 | -0,912331589 | 0,289420976 |  |
| 217459_at    | -         | -0,622910612 | -0,912331589 | 0,289420976 |  |
| 219325_s_at  | ELAC1     | -0,622910612 | -0,912331589 | 0,289420976 |  |
| 220733_at    | SLC26A1   | -0,622910612 | -0,912331589 | 0,289420976 |  |
| 223434_at    | GBP3      | -0,622910612 | -0,912331589 | 0,289420976 |  |
| 227688_at    | LRCH2     | -0,622910612 | -0,912331589 | 0,289420976 |  |
| 230534_at    | ZNF678    | -0,622910612 | -0,912331589 | 0,289420976 |  |
| 1552631_a_at | MAP3K6    | -0,033456564 | -0,322870281 | 0,289413717 |  |
| 1560826_at   | -         | -0,033456564 | -0,322870281 | 0,289413717 |  |
| 1561988_at   | LOC286068 | -0,033456564 | -0,322870281 | 0,289413717 |  |
| 1562910_at   | SH3PXD2B  | -0,033456564 | -0,322870281 | 0,289413717 |  |
| 205692_s_at  | CD38      | -0,033456564 | -0,322870281 | 0,289413717 |  |
| 221315_s_at  | FGF22     | -0,033456564 | -0,322870281 | 0,289413717 |  |
| 226485_at    | VSIG10    | -0,033456564 | -0,322870281 | 0,289413717 |  |
| 227893_at    | LINC00476 | -0,033456564 | -0,322870281 | 0,289413717 |  |
| 232212_at    | PLEKHA8   | -0,033456564 | -0,322870281 | 0,289413717 |  |
| 218649_x_at  | NEMF      | 4,321885451  | 4,032509762  | 0,289375689 |  |
| 218404_at    | SNX10     | 0,03125738   | -0,258114234 | 0,289371614 |  |
| 243203_at    | -         | 0,03125738   | -0,258114234 | 0,289371614 |  |
| 214800_x_at  | BTF3      | 6,34364026   | 6,054320155  | 0,289320105 |  |
| 216647_at    | TCF3      | -0,172274514 | -0,461594427 | 0,289319913 |  |
| 236540_at    | -         | -0,172274514 | -0,461594427 | 0,289319913 |  |
| 203197_s_at  | C1orf123  | 2,718233611  | 2,428994491  | 0,28923912  |  |
| 219441_s_at  | LRRK1     | 0,152582607  | -0,136643983 | 0,28922659  |  |
| 1562220_at   | -         | 0,209623097  | -0,079522948 | 0,289146045 |  |
| 205575_at    | C1QL1     | 0,209623097  | -0,079522948 | 0,289146045 |  |
| 210318_at    | RBP3      | 0,209623097  | -0,079522948 | 0,289146045 |  |
| 220054_at    | IL23A     | 0,209623097  | -0,079522948 | 0,289146045 |  |
| 230047_at    | ARHGAP42  | 0,209623097  | -0,079522948 | 0,289146045 |  |
| 221486_at    | ENSA      | 1,094335495  | 0,805216064  | 0,289119431 |  |
| 209681_at    | SLC19A2   | 3,025418883  | 2,7363693    | 0,289049583 |  |
| 201464_x_at  | JUN       | 4,102254727  | 3,813221015  | 0,289033712 |  |
| 200067_x_at  | SNX3      | 6,302238787  | 6,013216675  | 0,289022112 |  |
| 206357_at    | OPA3      | 0,317354302  | 0,028364014  | 0,288990288 |  |
| 226678_at    | UNC13D    | 0,317354302  | 0,028364014  | 0,288990288 |  |
| 232470_at    | SIK1      | 0,317354302  | 0,028364014  | 0,288990288 |  |
| 242479_s_at  | MCM4      | 0,317354302  | 0,028364014  | 0,288990288 |  |
| 220199_s_at  | AIDA      | 3,102740237  | 2,813804482  | 0,288935755 |  |
| 204402_at    | RHBDD3    | 1,758252436  | 1,469325098  | 0,288927339 |  |
| 216100_s_at  | TOR1AIP1  | 1,795990708  | 1,507116528  | 0,28887418  |  |
| 1559529_at   | PTK2      | 0,417596971  | 0,128747141  | 0,28884983  |  |
| 202044_at    | ARHGAP35  | 0,417596971  | 0,128747141  | 0,28884983  |  |
| 202103_at    | BRD4      | 0,46522187   | 0,176436073  | 0,288785797 |  |
| 209611_s_at  | SLC1A4    | 0,46522187   | 0,176436073  | 0,288785797 |  |
| 223578_x_at  | MALAT1    | 0,46522187   | 0,176436073  | 0,288785797 |  |
| 235327_x_at  | UBXN2A    | 3,245961699  | 2,957221307  | 0,288740392 |  |
| 225906_at    | -         | 1,369290453  | 1,080561626  | 0,288728827 |  |
| 230556_at    | IMMP1L    | 1,394109935  | 1,105412836  | 0,2886971   |  |
| 227767_at    | CSNK1G3   | 2,630440446  | 2,341749893  | 0,288690553 |  |

|              |                  |              |              |             |
|--------------|------------------|--------------|--------------|-------------|
| 206883_x_at  | GP9              | 0,555999837  | 0,26733076   | 0,288669077 |
| 212092_at    | PEG10            | 0,555999837  | 0,26733076   | 0,288669077 |
| 229197_at    | ING5             | 0,555999837  | 0,26733076   | 0,288669077 |
| 229525_at    | -                | 0,555999837  | 0,26733076   | 0,288669077 |
| 225174_at    | DNAJC10          | 3,651373876  | 3,362748434  | 0,288625442 |
| 1556242_a_at | LOC100310756     | -0,325749314 | -0,614371577 | 0,288622263 |
| 1565703_at   | SMAD4            | -0,325749314 | -0,614371577 | 0,288622263 |
| 219652_s_at  | CXorf36          | -0,325749314 | -0,614371577 | 0,288622263 |
| 223611_s_at  | LNK1             | -0,325749314 | -0,614371577 | 0,288622263 |
| 226402_at    | CYP2U1           | -0,325749314 | -0,614371577 | 0,288622263 |
| 228119_at    | LRCH3            | -0,325749314 | -0,614371577 | 0,288622263 |
| 229396_at    | OVOL1            | -0,325749314 | -0,614371577 | 0,288622263 |
| 240674_at    | JARID2           | -0,325749314 | -0,614371577 | 0,288622263 |
| 243785_at    | LOC100272217     | -0,325749314 | -0,614371577 | 0,288622263 |
| 222705_s_at  | SLC25A15         | 0,641402394  | 0,352836757  | 0,288565637 |
| 1559222_at   | -                | -1,089016378 | -1,377419394 | 0,288403016 |
| 1561884_at   | CEPT1            | -1,089016378 | -1,377419394 | 0,288403016 |
| 1565771_at   | DKFZp434E1119    | -1,089016378 | -1,377419394 | 0,288403016 |
| 215721_at    | IGHG1            | -1,089016378 | -1,377419394 | 0,288403016 |
| 217476_at    | NR1D1 /// THRA   | -1,089016378 | -1,377419394 | 0,288403016 |
| 219463_at    | LAMP5            | -1,089016378 | -1,377419394 | 0,288403016 |
| 238526_at    | RAB3IP           | -1,089016378 | -1,377419394 | 0,288403016 |
| 239931_at    | -                | -1,089016378 | -1,377419394 | 0,288403016 |
| 240498_at    | -                | -1,089016378 | -1,377419394 | 0,288403016 |
| 219399_at    | LIN7C            | 2,817903185  | 2,529740643  | 0,288162542 |
| 202564_x_at  | ARL2             | 2,59162628   | 2,303602088  | 0,288024192 |
| 203566_s_at  | AGL              | 2,59162628   | 2,303602088  | 0,288024192 |
| 217739_s_at  | NAMPT            | 3,800390846  | 3,512402411  | 0,287988435 |
| 201985_at    | KIAA0196         | 3,410096504  | 3,122166354  | 0,28793015  |
| 226100_at    | MLL5             | 2,933877275  | 2,646096941  | 0,287780334 |
| 222732_at    | TRIM39 /// TRIM3 | 1,603688695  | 1,315948728  | 0,287739967 |
| 228854_at    | -                | 3,032022986  | 2,744302548  | 0,287720438 |
| 1561704_at   | -                | -2,667025278 | -2,954576755 | 0,287551478 |
| 1562080_at   | LINC00424        | -2,667025278 | -2,954576755 | 0,287551478 |
| 1563690_at   | PPP4R1           | -2,667025278 | -2,954576755 | 0,287551478 |
| 1567575_at   | -                | -2,667025278 | -2,954576755 | 0,287551478 |
| 1569297_at   | LOC731779        | -2,667025278 | -2,954576755 | 0,287551478 |
| 205152_at    | SLC6A1           | -2,667025278 | -2,954576755 | 0,287551478 |
| 206786_at    | HTN3             | -2,667025278 | -2,954576755 | 0,287551478 |
| 206960_at    | LPAR4            | -2,667025278 | -2,954576755 | 0,287551478 |
| 209291_at    | ID4              | -2,667025278 | -2,954576755 | 0,287551478 |
| 221126_at    | DKK3             | -2,667025278 | -2,954576755 | 0,287551478 |
| 224116_at    | -                | -2,667025278 | -2,954576755 | 0,287551478 |
| 234448_at    | -                | -2,667025278 | -2,954576755 | 0,287551478 |
| 240143_at    | -                | -2,667025278 | -2,954576755 | 0,287551478 |
| 240787_at    | -                | -2,667025278 | -2,954576755 | 0,287551478 |
| 244256_at    | CACNA1E          | -2,667025278 | -2,954576755 | 0,287551478 |
| 244511_at    | -                | -2,667025278 | -2,954576755 | 0,287551478 |
| 44702_at     | SYDE1            | 1,562314261  | 1,274914139  | 0,287400122 |
| 1556889_s_at | -                | -3,114791413 | -3,402185466 | 0,287394053 |
| 242516_x_at  | RBM46            | -3,114791413 | -3,402185466 | 0,287394053 |
| 242955_x_at  | -                | -3,114791413 | -3,402185466 | 0,287394053 |
| 1053_at      | RFC2             | 2,831595806  | 2,544354523  | 0,287241283 |
| 222120_at    | ZNF764           | 0,767063567  | 0,479907041  | 0,287156526 |
| 222536_s_at  | ZNF395           | 0,767063567  | 0,479907041  | 0,287156526 |
| 222078_at    | PKLR             | 0,841135803  | 0,553993624  | 0,287142179 |

|              |           |              |              |             |  |
|--------------|-----------|--------------|--------------|-------------|--|
| 1555830_s_at | ESYT2     | 0,911589958  | 0,624460759  | 0,287129199 |  |
| 205946_at    | VIPR2     | 0,911589958  | 0,624460759  | 0,287129199 |  |
| 228996_at    | RC3H1     | 0,911589958  | 0,624460759  | 0,287129199 |  |
| 218392_x_at  | SFXN1     | 3,352164686  | 3,065035915  | 0,287128771 |  |
| 209984_at    | KDM4C     | 0,945567441  | 0,658444279  | 0,287123162 |  |
| 41329_at     | SCYL3     | 1,148825584  | 0,86173571   | 0,287089874 |  |
| 1553136_at   | KCTD18    | 1,163336153  | 0,876248481  | 0,287087672 |  |
| 226778_at    | C8orf42   | 1,163336153  | 0,876248481  | 0,287087672 |  |
| 238766_at    | -         | 1,163336153  | 0,876248481  | 0,287087672 |  |
| 220985_s_at  | RNF170    | 1,191926657  | 0,904843258  | 0,287083398 |  |
| 206613_s_at  | TAF1A     | 1,805273023  | 1,518263577  | 0,287009446 |  |
| 210793_s_at  | NUP98     | 3,51093129   | 3,22439681   | 0,28653448  |  |
| 213058_at    | TTC28     | 2,208874124  | 1,922365006  | 0,286509118 |  |
| 213501_at    | ACOX1     | 2,122398022  | 1,835911187  | 0,286486836 |  |
| 218422_s_at  | RBM26     | 4,386700496  | 4,100219485  | 0,286481011 |  |
| 209258_s_at  | SMC3      | 1,523472489  | 1,23718272   | 0,286289769 |  |
| 202156_s_at  | CELF2     | 3,008105382  | 2,721978587  | 0,286126796 |  |
| 225444_at    | UBN2      | 2,344516784  | 2,058399602  | 0,286117182 |  |
| 207730_x_at  | -         | 2,331726354  | 2,045615873  | 0,286110481 |  |
| 201450_s_at  | TIA1      | 3,312571045  | 3,026519779  | 0,286051266 |  |
| 201414_s_at  | NAP1L4    | 3,266269388  | 2,980244813  | 0,286024575 |  |
| 225222_at    | HIAT1     | 3,729838025  | 3,443906002  | 0,285932024 |  |
| 216383_at    | -         | 3,670124012  | 3,384231608  | 0,285892404 |  |
| 227056_at    | KIAA0141  | 1,865674241  | 1,579853228  | 0,285821013 |  |
| 209053_s_at  | WHSC1     | 2,81177561   | 2,526063925  | 0,285711686 |  |
| 238562_at    | UTP23     | 1,67631007   | 1,390636111  | 0,285673959 |  |
| 221749_at    | YTHDF3    | 4,997744463  | 4,712174488  | 0,285569974 |  |
| 34260_at     | TELO2     | 1,538392922  | 1,252838876  | 0,285554046 |  |
| 203017_s_at  | SSX2IP    | 2,893830579  | 2,608344689  | 0,28548589  |  |
| 202101_s_at  | RALB      | 2,516380342  | 2,230931691  | 0,285448651 |  |
| 208828_at    | POLE3     | 5,214280103  | 4,928848136  | 0,285431966 |  |
| 218432_at    | FBXO3     | 2,035673598  | 1,750261389  | 0,28541221  |  |
| 204836_at    | GLDC      | 3,052955227  | 2,767843855  | 0,285111371 |  |
| 211698_at    | EID1      | 4,072452125  | 3,787346121  | 0,285106004 |  |
| 231057_at    | -         | 1,05337236   | 0,768343791  | 0,285028569 |  |
| 232918_at    | LOC541471 | 1,05337236   | 0,768343791  | 0,285028569 |  |
| 1555282_a_at | PPARGC1B  | -0,394749123 | -0,679763839 | 0,285014716 |  |
| 1562600_at   | -         | -0,394749123 | -0,679763839 | 0,285014716 |  |
| 205777_at    | DUSP9     | -0,394749123 | -0,679763839 | 0,285014716 |  |
| 210087_s_at  | MPZL1     | -0,394749123 | -0,679763839 | 0,285014716 |  |
| 224408_at    | MCHR2     | -0,394749123 | -0,679763839 | 0,285014716 |  |
| 232294_at    | LOC219347 | -0,394749123 | -0,679763839 | 0,285014716 |  |
| 235544_x_at  | FAM171A2  | -0,394749123 | -0,679763839 | 0,285014716 |  |
| 238679_at    | MESDC2    | -0,394749123 | -0,679763839 | 0,285014716 |  |
| 241475_at    | BREA2     | -0,394749123 | -0,679763839 | 0,285014716 |  |
| 242832_at    | PER1      | -0,394749123 | -0,679763839 | 0,285014716 |  |
| 219070_s_at  | MOSPD3    | 1,021868205  | 0,73688026   | 0,284987945 |  |
| 227375_at    | ANKRD13C  | 1,021868205  | 0,73688026   | 0,284987945 |  |
| 243010_at    | MSI2      | 0,95671774   | 0,67181667   | 0,28490107  |  |
| 214118_x_at  | PCM1      | 4,536342985  | 4,251494565  | 0,28484842  |  |
| 32541_at     | PPP3CC    | 1,769361774  | 1,484560668  | 0,284801106 |  |
| 213789_at    | -         | 1,485482016  | 1,200746069  | 0,284735946 |  |
| 241682_at    | KLHL23    | 1,462198073  | 1,177496821  | 0,284701253 |  |
| 239042_at    | TSR1      | 0,779676066  | 0,495031851  | 0,284644215 |  |
| 1554574_a_at | CYB5R3    | 1,390002893  | 1,105412836  | 0,284590058 |  |
| 1555900_at   | -         | 1,390002893  | 1,105412836  | 0,284590058 |  |

|              |                |              |              |             |  |
|--------------|----------------|--------------|--------------|-------------|--|
| 235349_at    | FAM82A1        | 0,702292136  | 0,417770464  | 0,284521673 |  |
| 1559067_a_at | LOC158402      | 1,314003737  | 1,029536893  | 0,284466843 |  |
| 203134_at    | PICALM         | 1,314003737  | 1,029536893  | 0,284466843 |  |
| 214788_x_at  | DDN            | 0,661985843  | 0,377530647  | 0,284455196 |  |
| 228181_at    | SLC30A1        | 1,261018186  | 0,976641161  | 0,284377025 |  |
| 1556665_at   | LOC100652860 / | -1,047650486 | -1,332017329 | 0,284366844 |  |
| 1557585_at   | ATP6V1H        | -1,047650486 | -1,332017329 | 0,284366844 |  |
| 1559075_s_at | BAHCC1         | -1,047650486 | -1,332017329 | 0,284366844 |  |
| 1561591_at   | -              | -1,047650486 | -1,332017329 | 0,284366844 |  |
| 205518_s_at  | CMAHP          | -1,047650486 | -1,332017329 | 0,284366844 |  |
| 206629_at    | ADAMTSL2       | -1,047650486 | -1,332017329 | 0,284366844 |  |
| 214781_at    | -              | -1,047650486 | -1,332017329 | 0,284366844 |  |
| 216075_at    | -              | -1,047650486 | -1,332017329 | 0,284366844 |  |
| 216361_s_at  | KAT6A          | -1,047650486 | -1,332017329 | 0,284366844 |  |
| 223709_s_at  | WNT10A         | -1,047650486 | -1,332017329 | 0,284366844 |  |
| 225630_at    | EEPD1          | -1,047650486 | -1,332017329 | 0,284366844 |  |
| 229012_at    | C9orf24        | -1,047650486 | -1,332017329 | 0,284366844 |  |
| 230803_s_at  | ARHGAP24       | -1,047650486 | -1,332017329 | 0,284366844 |  |
| 230951_at    | EPB41L5        | -1,047650486 | -1,332017329 | 0,284366844 |  |
| 236043_at    | LOC100130175   | -1,047650486 | -1,332017329 | 0,284366844 |  |
| 237030_at    | ACPP           | -1,047650486 | -1,332017329 | 0,284366844 |  |
| 240056_at    | NSMAF          | -1,047650486 | -1,332017329 | 0,284366844 |  |
| 240891_at    | FSTL1          | -1,047650486 | -1,332017329 | 0,284366844 |  |
| 244047_at    | -              | -1,047650486 | -1,332017329 | 0,284366844 |  |
| 244344_at    | WNK4           | -1,047650486 | -1,332017329 | 0,284366844 |  |
| 221664_s_at  | F11R           | 2,510717331  | 2,226407528  | 0,284309803 |  |
| 1553627_s_at | C17orf57       | -2,712026959 | -2,996335703 | 0,284308743 |  |
| 1570136_at   | -              | -2,712026959 | -2,996335703 | 0,284308743 |  |
| 1570384_at   | TAS2R19        | -2,712026959 | -2,996335703 | 0,284308743 |  |
| 217306_at    | -              | -2,712026959 | -2,996335703 | 0,284308743 |  |
| 232461_at    | AHI1           | -2,712026959 | -2,996335703 | 0,284308743 |  |
| 237912_at    | -              | -2,712026959 | -2,996335703 | 0,284308743 |  |
| 238555_at    | -              | -2,712026959 | -2,996335703 | 0,284308743 |  |
| 238810_at    | RFX3           | -2,712026959 | -2,996335703 | 0,284308743 |  |
| 240137_at    | -              | -2,712026959 | -2,996335703 | 0,284308743 |  |
| 241705_at    | ABCA5          | -2,712026959 | -2,996335703 | 0,284308743 |  |
| 243317_at    | -              | -2,712026959 | -2,996335703 | 0,284308743 |  |
| 241703_at    | RUNDC3B        | 1,177702228  | 0,893473268  | 0,28422896  |  |
| 1567081_x_at | CLN6           | 1,119359127  | 0,835239052  | 0,284120075 |  |
| 210910_s_at  | POMZP3         | 1,119359127  | 0,835239052  | 0,284120075 |  |
| 205280_at    | GLRB           | 1,089278259  | 0,805216064  | 0,284062195 |  |
| 221833_at    | LOC100507577 / | 1,089278259  | 0,805216064  | 0,284062195 |  |
| 239913_at    | SLC10A4        | 4,450701473  | 4,166665505  | 0,284035969 |  |
| 212628_at    | PKN2           | 2,355089531  | 2,071071048  | 0,284018483 |  |
| 205005_s_at  | NMT2           | 2,11992033   | 1,835911187  | 0,284009143 |  |
| 222611_s_at  | PSPC1          | 2,089851283  | 1,805902329  | 0,283948954 |  |
| 228452_at    | C17orf39       | 2,074578432  | 1,790660532  | 0,2839179   |  |
| 205136_s_at  | NUFIP1         | 1,764611101  | 1,480766833  | 0,283844268 |  |
| 228168_at    | ATP5G3         | 1,764611101  | 1,480766833  | 0,283844268 |  |
| 226882_x_at  | WDR4           | 2,466546243  | 2,182705233  | 0,28384101  |  |
| 242961_x_at  | DDX58          | 2,466546243  | 2,182705233  | 0,28384101  |  |
| 1560348_at   | RGNEF          | 0,291166226  | 0,007421914  | 0,283744312 |  |
| 1569986_x_at | TNNT3          | 0,291166226  | 0,007421914  | 0,283744312 |  |
| 239044_at    | ITFG1          | 0,291166226  | 0,007421914  | 0,283744312 |  |
| 206875_s_at  | SLK            | 3,798842702  | 3,515187047  | 0,283655655 |  |
| 89476_r_at   | NPEPL1         | -0,298635321 | -0,582258154 | 0,283622833 |  |

|              |                |              |              |             |  |
|--------------|----------------|--------------|--------------|-------------|--|
| 241653_x_at  | -              | -3,15396682  | -3,437493426 | 0,283526606 |  |
| 1552924_a_at | PITPNM2        | 0,181384709  | -0,102100538 | 0,283485247 |  |
| 219413_at    | ACBD4          | 0,181384709  | -0,102100538 | 0,283485247 |  |
| 241798_at    | -              | 0,181384709  | -0,102100538 | 0,283485247 |  |
| 209674_at    | CRY1           | 4,111638046  | 3,828227545  | 0,283410501 |  |
| 226151_x_at  | CRYZL1         | 2,860082603  | 2,576704359  | 0,283378243 |  |
| 205490_x_at  | GJB3           | 0,123193849  | -0,160136748 | 0,283330598 |  |
| 210365_at    | LOC100506403 / | 0,123193849  | -0,160136748 | 0,283330598 |  |
| 214873_at    | LRP5L          | 0,123193849  | -0,160136748 | 0,283330598 |  |
| 226698_at    | FCHSD1         | 0,123193849  | -0,160136748 | 0,283330598 |  |
| 201448_at    | TIA1           | 4,018934862  | 3,735753654  | 0,283181208 |  |
| 228164_at    | AP4E1          | 2,281618189  | 1,998633167  | 0,282985022 |  |
| 1567255_at   | OR10D1P        | -0,00073712  | -0,283667828 | 0,282930707 |  |
| 221400_at    | MYO3A          | -0,00073712  | -0,283667828 | 0,282930707 |  |
| 229583_at    | -              | -0,00073712  | -0,283667828 | 0,282930707 |  |
| 230734_x_at  | STRN           | 2,64946283   | 2,366632651  | 0,282830179 |  |
| 223228_at    | LDOC1L         | 2,361396186  | 2,078620836  | 0,282775351 |  |
| 206303_s_at  | NUDT4          | 3,133773173  | 2,851017268  | 0,282755905 |  |
| 201925_s_at  | CD55           | 3,912008086  | 3,629253073  | 0,282755012 |  |
| 222207_x_at  | -              | 3,849821959  | 3,56709884   | 0,282723119 |  |
| 225671_at    | SPNS2          | 2,001086023  | 1,718396606  | 0,282689417 |  |
| 201088_at    | KPNA2          | 6,42203549   | 6,139502818  | 0,282532672 |  |
| 206383_s_at  | G3BP2          | 2,771299138  | 2,488772006  | 0,282527132 |  |
| 32723_at     | CSTF1          | 3,123915073  | 2,841433901  | 0,282481172 |  |
| 221759_at    | G6PC3          | 1,473887017  | 1,191491281  | 0,282395736 |  |
| 206453_s_at  | NDRG2          | 1,187200746  | 0,904843258  | 0,282357488 |  |
| 215001_s_at  | GLUL           | 5,936974356  | 5,654663835  | 0,282310521 |  |
| 39705_at     | SIN3B          | 2,940210922  | 2,657904765  | 0,282306157 |  |
| 223650_s_at  | NRBF2          | 1,672933557  | 1,390636111  | 0,282297445 |  |
| 202551_s_at  | CRIM1          | -0,136301282 | -0,41858459  | 0,282283307 |  |
| 205718_at    | ITGB7          | -0,136301282 | -0,41858459  | 0,282283307 |  |
| 219959_at    | MOCOS          | -0,136301282 | -0,41858459  | 0,282283307 |  |
| 229696_at    | FECH           | -0,136301282 | -0,41858459  | 0,282283307 |  |
| 236913_at    | -              | -0,136301282 | -0,41858459  | 0,282283307 |  |
| 239214_at    | LOC100130458   | -0,136301282 | -0,41858459  | 0,282283307 |  |
| 205002_at    | AHDC1          | 1,129248302  | 0,847075464  | 0,282172838 |  |
| 229321_s_at  | -              | 1,631786706  | 1,349621332  | 0,282165374 |  |
| 231869_at    | KIAA1586       | 4,731959456  | 4,449849671  | 0,282109785 |  |
| 201531_at    | ZFP36          | 2,68509622   | 2,403170156  | 0,281926065 |  |
| 1563485_at   | -              | 0,715481152  | 0,433557298  | 0,281923853 |  |
| 226986_at    | WIPI2          | 2,675004741  | 2,39311332   | 0,281891422 |  |
| 214449_s_at  | RHOQ           | 1,037706275  | 0,755840599  | 0,281865676 |  |
| 1564021_at   | LOC100130456   | 0,67554678   | 0,393761504  | 0,281785276 |  |
| 209972_s_at  | AIMP2          | 0,67554678   | 0,393761504  | 0,281785276 |  |
| 231222_at    | -              | 0,67554678   | 0,393761504  | 0,281785276 |  |
| 202007_at    | NID1           | 3,308224834  | 3,026519779  | 0,281705055 |  |
| 203933_at    | RAB11FIP3      | 0,97328325   | 0,691645685  | 0,281637565 |  |
| 208788_at    | ELOVL5         | 6,192813132  | 5,911202215  | 0,281610917 |  |
| 212476_at    | ACAP2          | 3,495722611  | 3,21415095   | 0,281571661 |  |
| 219966_x_at  | BANP           | 3,268508253  | 2,986947093  | 0,28156116  |  |
| 212403_at    | UBE3B          | 2,478200152  | 2,196649505  | 0,281550647 |  |
| 222441_x_at  | SLMO2          | 4,648465551  | 4,36698147   | 0,28148408  |  |
| 226444_at    | -              | 0,592200562  | 0,310717132  | 0,28148343  |  |
| 52741_at     | TRMT61A        | 1,62481334   | 1,343367293  | 0,281446047 |  |
| 219668_at    | GDAP1L1        | -0,57445847  | -0,855751026 | 0,281292556 |  |
| 220740_s_at  | SLC12A6        | -0,57445847  | -0,855751026 | 0,281292556 |  |

|              |                 |              |              |             |  |
|--------------|-----------------|--------------|--------------|-------------|--|
| 226972_s_at  | CCDC136         | -0,57445847  | -0,855751026 | 0,281292556 |  |
| 237872_at    | LOC100505697    | -0,57445847  | -0,855751026 | 0,281292556 |  |
| 244818_at    | ZNF780B         | -0,57445847  | -0,855751026 | 0,281292556 |  |
| 221643_s_at  | RERE            | 0,503742507  | 0,222599095  | 0,281143412 |  |
| 227606_s_at  | STAMBPL1        | 0,503742507  | 0,222599095  | 0,281143412 |  |
| 209629_s_at  | NXT2            | 2,009141686  | 1,728030156  | 0,281111153 |  |
| 233385_x_at  | MIA-RAB4B /// R | 1,85379461   | 1,572742379  | 0,281052231 |  |
| 1554609_at   | LOC100287896    | -0,285837228 | -0,566887459 | 0,281050231 |  |
| 1561868_at   | -               | -0,285837228 | -0,566887459 | 0,281050231 |  |
| 210654_at    | TNFRSF10D       | -0,285837228 | -0,566887459 | 0,281050231 |  |
| 215201_at    | REPS1           | -0,285837228 | -0,566887459 | 0,281050231 |  |
| 224087_at    | -               | -0,285837228 | -0,566887459 | 0,281050231 |  |
| 236647_at    | -               | -0,285837228 | -0,566887459 | 0,281050231 |  |
| 1555640_at   | DAOA            | -2,756478458 | -3,037500868 | 0,28102241  |  |
| 1563039_at   | LOC100506195    | -2,756478458 | -3,037500868 | 0,28102241  |  |
| 1566043_at   | -               | -2,756478458 | -3,037500868 | 0,28102241  |  |
| 209335_at    | DCN             | -2,756478458 | -3,037500868 | 0,28102241  |  |
| 210498_at    | CLTC            | -2,756478458 | -3,037500868 | 0,28102241  |  |
| 216057_at    | AURKAPS1 /// R  | -2,756478458 | -3,037500868 | 0,28102241  |  |
| 217131_at    | -               | -2,756478458 | -3,037500868 | 0,28102241  |  |
| 235915_at    | -               | -2,756478458 | -3,037500868 | 0,28102241  |  |
| 236502_at    | -               | -2,756478458 | -3,037500868 | 0,28102241  |  |
| 237122_at    | WDR7            | -2,756478458 | -3,037500868 | 0,28102241  |  |
| 237177_at    | CNTN4           | -2,756478458 | -3,037500868 | 0,28102241  |  |
| 239624_at    | -               | -2,756478458 | -3,037500868 | 0,28102241  |  |
| 242721_at    | -               | -2,756478458 | -3,037500868 | 0,28102241  |  |
| 208386_x_at  | DMC1            | 0,798390451  | 0,51742585   | 0,2809646   |  |
| 215700_x_at  | CPNE6           | 0,457392764  | 0,176436073  | 0,280956691 |  |
| 223147_s_at  | SFT2D3 /// WDR  | 0,457392764  | 0,176436073  | 0,280956691 |  |
| 232922_s_at  | SLC17A9         | 0,457392764  | 0,176436073  | 0,280956691 |  |
| 1562495_at   | ANKFY1          | -0,83191556  | -1,112851844 | 0,280936284 |  |
| 1566135_at   | CARHSP1         | -0,83191556  | -1,112851844 | 0,280936284 |  |
| 1570373_at   | ZNF746          | -0,83191556  | -1,112851844 | 0,280936284 |  |
| 205468_s_at  | IRF5            | -0,83191556  | -1,112851844 | 0,280936284 |  |
| 207191_s_at  | ISLR            | -0,83191556  | -1,112851844 | 0,280936284 |  |
| 210141_s_at  | INHA            | -0,83191556  | -1,112851844 | 0,280936284 |  |
| 216630_at    | -               | -0,83191556  | -1,112851844 | 0,280936284 |  |
| 216661_x_at  | CYP2C9          | -0,83191556  | -1,112851844 | 0,280936284 |  |
| 217258_x_at  | IGLV1-44        | -0,83191556  | -1,112851844 | 0,280936284 |  |
| 217415_at    | POLR2A          | -0,83191556  | -1,112851844 | 0,280936284 |  |
| 219775_s_at  | CPLX3           | -0,83191556  | -1,112851844 | 0,280936284 |  |
| 220179_at    | DPEP3           | -0,83191556  | -1,112851844 | 0,280936284 |  |
| 235426_at    | GATM            | -0,83191556  | -1,112851844 | 0,280936284 |  |
| 238338_at    | -               | -0,83191556  | -1,112851844 | 0,280936284 |  |
| 244607_at    | -               | -0,83191556  | -1,112851844 | 0,280936284 |  |
| 1556194_a_at | -               | 2,760204767  | 2,479296438  | 0,280908329 |  |
| 223118_s_at  | USP47           | 2,305800198  | 2,024923328  | 0,28087687  |  |
| 220018_at    | CBLL1           | 1,799091453  | 1,518263577  | 0,280827876 |  |
| 220119_at    | EPB41L4A        | 0,760715727  | 0,479907041  | 0,280808686 |  |
| 212381_at    | USP24           | 2,994644467  | 2,713921281  | 0,280723186 |  |
| 201685_s_at  | TOX4            | 2,238870125  | 1,958277216  | 0,280592908 |  |
| 203598_s_at  | WBP4            | 2,333865983  | 2,053299695  | 0,280566288 |  |
| 213809_x_at  | TCF3            | 0,359971644  | 0,079428135  | 0,280543509 |  |
| 230606_at    | LOC100287525    | 0,359971644  | 0,079428135  | 0,280543509 |  |
| 213450_s_at  | ICOSLG          | 1,575032557  | 1,294497133  | 0,280535424 |  |
| 201816_s_at  | GBAS            | 4,297973795  | 4,017530898  | 0,280442897 |  |

|              |                  |              |              |             |  |
|--------------|------------------|--------------|--------------|-------------|--|
| 219986_s_at  | ACAD10           | 0,30867765   | 0,028364014  | 0,280313636 |  |
| 240342_at    | TRIM61           | 0,30867765   | 0,028364014  | 0,280313636 |  |
| 36907_at     | MVK              | 2,678376417  | 2,398150501  | 0,280225916 |  |
| 223213_s_at  | ZHX1             | 3,479385765  | 3,199221717  | 0,280164047 |  |
| 209296_at    | PPM1B            | 3,981211211  | 3,701119714  | 0,280091496 |  |
| 1554091_a_at | TIRAP            | 0,255492549  | -0,024572586 | 0,280065136 |  |
| 233686_at    | ASXL3            | 0,255492549  | -0,024572586 | 0,280065136 |  |
| 238473_at    | LOC100216545     | 0,255492549  | -0,024572586 | 0,280065136 |  |
| 1559400_s_at | PAPPA            | -0,366776884 | -0,646746079 | 0,279969195 |  |
| 1561233_at   | LOC283387        | -0,366776884 | -0,646746079 | 0,279969195 |  |
| 243484_x_at  | -                | -0,366776884 | -0,646746079 | 0,279969195 |  |
| 210649_s_at  | ARID1A           | 1,965648824  | 1,685812099  | 0,279836725 |  |
| 205706_s_at  | ANKRD26          | 1,04816921   | 0,768343791  | 0,27982542  |  |
| 206892_at    | AMHR2            | 0,20027154   | -0,079522948 | 0,279794488 |  |
| 1559986_at   | LIFR-AS1 /// MIR | -3,192553003 | -3,472251727 | 0,279698724 |  |
| 1565800_x_at | RAB3IP           | -3,192553003 | -3,472251727 | 0,279698724 |  |
| 1566930_at   | TFB2M            | -3,192553003 | -3,472251727 | 0,279698724 |  |
| 225484_at    | CEP41            | 2,402750389  | 2,123108223  | 0,279642166 |  |
| 224567_x_at  | LOC100507645 /   | 4,565770118  | 4,286143696  | 0,279626421 |  |
| 225087_at    | FOPNL            | 4,486724797  | 4,207122602  | 0,279602195 |  |
| 235189_at    | NARG2            | 0,984222186  | 0,704715219  | 0,279506967 |  |
| 242233_at    | -                | 0,984222186  | 0,704715219  | 0,279506967 |  |
| 226901_at    | C17orf58         | 2,718233611  | 2,438805127  | 0,279428484 |  |
| 217707_x_at  | SMARCA2          | 2,173470163  | 1,894118818  | 0,279351345 |  |
| 209656_s_at  | TMEM47           | 2,688444421  | 2,409170778  | 0,279273643 |  |
| 51146_at     | PIGV             | 0,925844617  | 0,646640981  | 0,279203636 |  |
| 207634_at    | PDCD1            | 0,083054335  | -0,19610998  | 0,279164315 |  |
| 229258_at    | KIF12            | 0,083054335  | -0,19610998  | 0,279164315 |  |
| 230626_at    | TSPAN12          | 0,083054335  | -0,19610998  | 0,279164315 |  |
| 219050_s_at  | ZNHIT2           | 0,917308734  | 0,638150376  | 0,279158358 |  |
| 1553780_at   | MGC23270         | 1,114389003  | 0,835239052  | 0,279149951 |  |
| 202929_s_at  | DDT              | 3,189186085  | 2,910041809  | 0,279144276 |  |
| 218924_s_at  | CTBS             | 0,882651021  | 0,603679647  | 0,278971374 |  |
| 227623_at    | CACNA2D1         | 0,020670649  | -0,258114234 | 0,278784883 |  |
| 235921_at    | -                | 0,020670649  | -0,258114234 | 0,278784883 |  |
| 212709_at    | NUP160           | 3,462861802  | 3,184136378  | 0,278725424 |  |
| 227866_at    | LOC100505519 /   | 1,493160564  | 1,214517879  | 0,278642685 |  |
| 213391_at    | DPY19L4          | 2,038300149  | 1,759685182  | 0,278614968 |  |
| 216484_x_at  | HDGF             | 3,717599787  | 3,439026336  | 0,278573451 |  |
| 226064_s_at  | DGAT2            | 1,318332599  | 1,039887232  | 0,278445368 |  |
| 202660_at    | ITPR2            | 1,446464021  | 1,16809119   | 0,27837283  |  |
| 226702_at    | CMPK2            | 2,640847372  | 2,362515214  | 0,278332158 |  |
| 213404_s_at  | RHEB             | 5,582338761  | 5,304027206  | 0,278311554 |  |
| 207236_at    | ZNF345           | 1,292162421  | 1,013870809  | 0,278291612 |  |
| 232136_s_at  | CTTNBP2          | 1,422536444  | 1,144305291  | 0,278231153 |  |
| 244192_x_at  | USP4             | 1,422536444  | 1,144305291  | 0,278231153 |  |
| 218396_at    | VPS13C           | 3,158127685  | 2,880111483  | 0,278016202 |  |
| 214554_at    | HIST1H2AG /// H  | 2,745814053  | 2,467842989  | 0,277971064 |  |
| 209267_s_at  | SLC39A8          | 3,664184451  | 3,386261038  | 0,277923413 |  |
| 233421_s_at  | NUP133           | 0,695652136  | 0,417770464  | 0,277881673 |  |
| 1554063_at   | ZHX1-C8ORF76     | 1,814495998  | 1,536652708  | 0,27784329  |  |
| 205798_at    | IL7R             | -0,112808516 | -0,39061235  | 0,277803834 |  |
| 209999_x_at  | SOCS1            | -0,112808516 | -0,39061235  | 0,277803834 |  |
| 221413_at    | KCNAB3           | -0,112808516 | -0,39061235  | 0,277803834 |  |
| 230571_at    | -                | -0,112808516 | -0,39061235  | 0,277803834 |  |
| 203987_at    | FZD6             | 2,074578432  | 1,796776588  | 0,277801844 |  |

|              |                |              |              |             |  |
|--------------|----------------|--------------|--------------|-------------|--|
| 239859_x_at  | ATP5S          | 1,210676994  | 0,932882274  | 0,27779472  |  |
| 206149_at    | CHP2           | -0,67289328  | -0,950686014 | 0,277792735 |  |
| 210894_s_at  | CEP250         | -0,67289328  | -0,950686014 | 0,277792735 |  |
| 227727_at    | MRGPRF         | -0,67289328  | -0,950686014 | 0,277792735 |  |
| 235516_at    | SEPSECS        | -0,67289328  | -0,950686014 | 0,277792735 |  |
| 240633_at    | DOK7           | -0,67289328  | -0,950686014 | 0,277792735 |  |
| 212238_at    | ASXL1          | 1,795990708  | 1,518263577  | 0,27772713  |  |
| 225737_s_at  | FBXO22         | 1,795990708  | 1,518263577  | 0,27772713  |  |
| 222573_s_at  | SAV1           | 2,41290634   | 2,135226207  | 0,277680132 |  |
| 1554029_a_at | TTC37          | -0,986356909 | -1,264005341 | 0,277648432 |  |
| 1564653_s_at | LEKR1          | -0,986356909 | -1,264005341 | 0,277648432 |  |
| 209437_s_at  | SPON1          | -0,986356909 | -1,264005341 | 0,277648432 |  |
| 209589_s_at  | EPHB2          | -0,986356909 | -1,264005341 | 0,277648432 |  |
| 211262_at    | LOC100507472 / | -0,986356909 | -1,264005341 | 0,277648432 |  |
| 211301_at    | KCND3          | -0,986356909 | -1,264005341 | 0,277648432 |  |
| 220366_at    | ELSPBP1        | -0,986356909 | -1,264005341 | 0,277648432 |  |
| 223648_s_at  | FGFRL1         | -0,986356909 | -1,264005341 | 0,277648432 |  |
| 231604_at    | -              | -0,986356909 | -1,264005341 | 0,277648432 |  |
| 234549_at    | -              | -0,986356909 | -1,264005341 | 0,277648432 |  |
| 235038_at    | KRR1           | -0,986356909 | -1,264005341 | 0,277648432 |  |
| 239373_at    | -              | -0,986356909 | -1,264005341 | 0,277648432 |  |
| 240682_at    | LINC00293      | -0,986356909 | -1,264005341 | 0,277648432 |  |
| 206648_at    | ZNF571         | 2,043538949  | 1,765933685  | 0,277605264 |  |
| 227026_at    | MPHOSPH8       | 3,091402928  | 2,813804482  | 0,277598446 |  |
| 204342_at    | SLC25A24       | 4,076291169  | 3,798818761  | 0,277472408 |  |
| 213198_at    | ACVR1B         | 2,845159691  | 2,567790814  | 0,277368877 |  |
| 1556588_at   | C15orf37       | 0,613492853  | 0,336136178  | 0,277356676 |  |
| 226676_at    | ZNF521         | 0,613492853  | 0,336136178  | 0,277356676 |  |
| 204418_x_at  | GSTM2          | 1,523472489  | 1,246149888  | 0,277322601 |  |
| 203637_s_at  | MID1           | 0,57058931   | 0,293518836  | 0,277070475 |  |
| 238825_at    | ACRC           | 1,094335495  | 0,817300337  | 0,277035158 |  |
| 219347_at    | NUDT15         | 3,495722611  | 3,218713651  | 0,277008959 |  |
| 222465_at    | RSL24D1        | 5,340953221  | 5,063983634  | 0,276969587 |  |
| 214193_s_at  | DIEXF          | 2,156646206  | 1,879785595  | 0,276860611 |  |
| 207650_x_at  | PTGER1         | 1,063722698  | 0,786897721  | 0,276824976 |  |
| 219833_s_at  | EFHC1          | 1,063722698  | 0,786897721  | 0,276824976 |  |
| 224064_s_at  | DHDDS          | 1,063722698  | 0,786897721  | 0,276824976 |  |
| 219206_x_at  | TMBIM4         | 3,28739962   | 3,010820719  | 0,276578902 |  |
| 219362_at    | NAA35          | 2,802535172  | 2,526063925  | 0,276471247 |  |
| 221627_at    | TRIM10         | 0,480753764  | 0,204310755  | 0,276443008 |  |
| 229907_at    | -              | 0,480753764  | 0,204310755  | 0,276443008 |  |
| 230988_at    | ADD2           | 0,480753764  | 0,204310755  | 0,276443008 |  |
| 232145_at    | C2orf68        | 0,480753764  | 0,204310755  | 0,276443008 |  |
| 222447_at    | METTL9         | 2,097427503  | 1,820984782  | 0,276442721 |  |
| 211984_at    | CALM1 /// CALM | 3,882346871  | 3,605931378  | 0,276415493 |  |
| 218752_at    | ZMAT5          | 1,783520648  | 1,507116528  | 0,27640412  |  |
| 1569777_a_at | ZPLD1          | 1,381753566  | 1,105412836  | 0,276340731 |  |
| 225371_at    | GLE1           | 3,082523011  | 2,806245339  | 0,276277671 |  |
| 204823_at    | NAV3           | -0,259832361 | -0,536087151 | 0,276254789 |  |
| 207969_x_at  | ACRV1          | -0,259832361 | -0,536087151 | 0,276254789 |  |
| 208599_at    | HUWE1          | -0,259832361 | -0,536087151 | 0,276254789 |  |
| 213290_at    | COL6A2         | -0,259832361 | -0,536087151 | 0,276254789 |  |
| 214231_s_at  | KIAA0564       | -0,259832361 | -0,536087151 | 0,276254789 |  |
| 217494_s_at  | PTENP1         | -0,259832361 | -0,536087151 | 0,276254789 |  |
| 218266_s_at  | NCS1           | -0,259832361 | -0,536087151 | 0,276254789 |  |
| 229638_at    | IRX3           | -0,259832361 | -0,536087151 | 0,276254789 |  |



|              |                    |              |              |             |  |
|--------------|--------------------|--------------|--------------|-------------|--|
| 243264_s_at  | C8orf44 /// C8orf4 | -0,259832361 | -0,536087151 | 0,276254789 |  |
| 1557638_at   | -                  | -0,543051993 | -0,819238336 | 0,276186343 |  |
| 1559065_a_at | CLEC4G             | -0,543051993 | -0,819238336 | 0,276186343 |  |
| 204543_at    | RAPGEF1            | -0,543051993 | -0,819238336 | 0,276186343 |  |
| 215680_at    | KIAA1654           | -0,543051993 | -0,819238336 | 0,276186343 |  |
| 221104_s_at  | NIPSNAP3B          | -0,543051993 | -0,819238336 | 0,276186343 |  |
| 226367_at    | KDM5A              | -0,543051993 | -0,819238336 | 0,276186343 |  |
| 228526_at    | -                  | -0,543051993 | -0,819238336 | 0,276186343 |  |
| 235221_at    | CBLN3              | -0,543051993 | -0,819238336 | 0,276186343 |  |
| 222731_at    | ZDHHC2             | 4,171484821  | 3,895315489  | 0,276169332 |  |
| 225506_at    | KIAA1468           | 1,726031811  | 1,450051551  | 0,27598026  |  |
| 229211_at    | DUSP28             | 1,331241794  | 1,055274826  | 0,275966968 |  |
| 228095_at    | PHF14              | 3,875753437  | 3,599822964  | 0,275930472 |  |
| 227142_at    | PLEKHG5            | 0,934330293  | 0,658444279  | 0,275886014 |  |
| 227900_at    | CBLB               | 1,305306849  | 1,029536893  | 0,275769956 |  |
| 205884_at    | ITGA4              | 2,825526235  | 2,549796788  | 0,275729447 |  |
| 206435_at    | B4GALNT1           | 0,384950573  | 0,109221392  | 0,275729181 |  |
| 209416_s_at  | FZR1               | 0,384950573  | 0,109221392  | 0,275729181 |  |
| 221048_x_at  | C17orf80           | 0,384950573  | 0,109221392  | 0,275729181 |  |
| 1552302_at   | TMEM106A           | -2,504600601 | -2,780313924 | 0,275713323 |  |
| 1553614_a_at | FLJ25694           | -2,504600601 | -2,780313924 | 0,275713323 |  |
| 1556272_a_at | -                  | -2,504600601 | -2,780313924 | 0,275713323 |  |
| 1559503_a_at | LOC441666          | -2,504600601 | -2,780313924 | 0,275713323 |  |
| 1565105_at   | -                  | -2,504600601 | -2,780313924 | 0,275713323 |  |
| 1566772_at   | -                  | -2,504600601 | -2,780313924 | 0,275713323 |  |
| 1566916_at   | HPYR1              | -2,504600601 | -2,780313924 | 0,275713323 |  |
| 1570300_at   | -                  | -2,504600601 | -2,780313924 | 0,275713323 |  |
| 205860_x_at  | FOLH1 /// FOLH1    | -2,504600601 | -2,780313924 | 0,275713323 |  |
| 211496_s_at  | PDC                | -2,504600601 | -2,780313924 | 0,275713323 |  |
| 220523_at    | EFHC2              | -2,504600601 | -2,780313924 | 0,275713323 |  |
| 220878_at    | -                  | -2,504600601 | -2,780313924 | 0,275713323 |  |
| 231239_at    | -                  | -2,504600601 | -2,780313924 | 0,275713323 |  |
| 234389_x_at  | -                  | -2,504600601 | -2,780313924 | 0,275713323 |  |
| 234540_at    | GCNT7              | -2,504600601 | -2,780313924 | 0,275713323 |  |
| 237670_at    | LOC284801          | -2,504600601 | -2,780313924 | 0,275713323 |  |
| 239883_s_at  | ANO4               | -2,504600601 | -2,780313924 | 0,275713323 |  |
| 240766_at    | -                  | -2,504600601 | -2,780313924 | 0,275713323 |  |
| 240815_at    | -                  | -2,504600601 | -2,780313924 | 0,275713323 |  |
| 244757_at    | -                  | -2,504600601 | -2,780313924 | 0,275713323 |  |
| 200087_s_at  | TMED2              | 5,887213751  | 5,611510757  | 0,275702994 |  |
| 1554125_a_at | NLGN4Y             | -2,823166348 | -3,098858316 | 0,275691968 |  |
| 1554724_at   | SLC6A11            | -2,823166348 | -3,098858316 | 0,275691968 |  |
| 1554912_at   | ESYT3              | -2,823166348 | -3,098858316 | 0,275691968 |  |
| 1555394_at   | PIGK               | -2,823166348 | -3,098858316 | 0,275691968 |  |
| 1559434_at   | -                  | -2,823166348 | -3,098858316 | 0,275691968 |  |
| 1559497_at   | -                  | -2,823166348 | -3,098858316 | 0,275691968 |  |
| 1562579_at   | -                  | -2,823166348 | -3,098858316 | 0,275691968 |  |
| 1564007_at   | -                  | -2,823166348 | -3,098858316 | 0,275691968 |  |
| 1566694_at   | -                  | -2,823166348 | -3,098858316 | 0,275691968 |  |
| 215101_s_at  | CXCL5              | -2,823166348 | -3,098858316 | 0,275691968 |  |
| 238720_at    | LOC100506582       | -2,823166348 | -3,098858316 | 0,275691968 |  |
| 243979_at    | -                  | -2,823166348 | -3,098858316 | 0,275691968 |  |
| 221213_s_at  | ZNF280D            | 0,900083947  | 0,624460759  | 0,275623188 |  |
| 229206_at    | -                  | 0,900083947  | 0,624460759  | 0,275623188 |  |
| 239426_at    | SLC2A8             | 0,900083947  | 0,624460759  | 0,275623188 |  |
| 203621_at    | NDUFB5             | 4,920655822  | 4,645113717  | 0,275542105 |  |

|              |                  |              |              |             |  |
|--------------|------------------|--------------|--------------|-------------|--|
| 204396_s_at  | GRK5             | 1,666156729  | 1,390636111  | 0,275520617 |  |
| 1564064_a_at | ATP11B           | 2,320980353  | 2,045615873  | 0,27536448  |  |
| 218242_s_at  | SUV420H1         | 1,883312263  | 1,60795124   | 0,275361023 |  |
| 213919_at    | DNAJC4           | 0,334552598  | 0,059218869  | 0,27533373  |  |
| 220798_x_at  | LPPR3            | 0,334552598  | 0,059218869  | 0,27533373  |  |
| 227969_at    | PCBP1-AS1        | 0,334552598  | 0,059218869  | 0,27533373  |  |
| 240076_at    | -                | 0,334552598  | 0,059218869  | 0,27533373  |  |
| 202632_at    | DPH1 /// OVCA2   | 2,972842302  | 2,697670403  | 0,275171899 |  |
| 244569_at    | C8orf37          | 1,224581536  | 0,949447784  | 0,275133752 |  |
| 1558688_at   | LOC441461        | 3,203298287  | 2,928263672  | 0,275034615 |  |
| 228274_at    | SDSL             | 2,90394695   | 2,629059192  | 0,274887757 |  |
| 210213_s_at  | EIF6             | 5,229587283  | 4,954720433  | 0,27486685  |  |
| 204346_s_at  | RASSF1           | 2,254767157  | 1,979940779  | 0,274826379 |  |
| 234675_x_at  | -                | 2,626954721  | 2,352169913  | 0,274784808 |  |
| 1557897_at   | -                | 0,792179257  | 0,51742585   | 0,274753406 |  |
| 226638_at    | ARHGAP23         | 0,792179257  | 0,51742585   | 0,274753406 |  |
| 213718_at    | RBM4             | 0,627515113  | 0,352836757  | 0,274678356 |  |
| 226454_at    | 09.03.15         | 1,168140757  | 0,893473268  | 0,274667489 |  |
| 206953_s_at  | LPHN2            | 1,46610492   | 1,191491281  | 0,274613639 |  |
| 226887_at    | HSPA14           | 2,605861638  | 2,331254065  | 0,274607573 |  |
| 1557267_s_at | GEN1             | -1,812418401 | -2,086984744 | 0,274566343 |  |
| 1563523_at   | -                | -1,812418401 | -2,086984744 | 0,274566343 |  |
| 1563601_at   | -                | -1,812418401 | -2,086984744 | 0,274566343 |  |
| 1564231_at   | IFT80            | -1,812418401 | -2,086984744 | 0,274566343 |  |
| 1569590_at   | DOCK5            | -1,812418401 | -2,086984744 | 0,274566343 |  |
| 1570574_at   | -                | -1,812418401 | -2,086984744 | 0,274566343 |  |
| 206111_at    | RNASE2           | -1,812418401 | -2,086984744 | 0,274566343 |  |
| 206939_at    | DCC              | -1,812418401 | -2,086984744 | 0,274566343 |  |
| 207977_s_at  | DPT              | -1,812418401 | -2,086984744 | 0,274566343 |  |
| 210116_at    | SH2D1A           | -1,812418401 | -2,086984744 | 0,274566343 |  |
| 215242_at    | LOC100505991 /   | -1,812418401 | -2,086984744 | 0,274566343 |  |
| 215297_at    | LOC441204        | -1,812418401 | -2,086984744 | 0,274566343 |  |
| 220530_at    | -                | -1,812418401 | -2,086984744 | 0,274566343 |  |
| 233649_at    | KATNAL2          | -1,812418401 | -2,086984744 | 0,274566343 |  |
| 234168_at    | TAF15            | -1,812418401 | -2,086984744 | 0,274566343 |  |
| 234257_at    | TNS3             | -1,812418401 | -2,086984744 | 0,274566343 |  |
| 234750_at    | CACNG8           | -1,812418401 | -2,086984744 | 0,274566343 |  |
| 239994_at    | -                | -1,812418401 | -2,086984744 | 0,274566343 |  |
| 241695_s_at  | -                | -1,812418401 | -2,086984744 | 0,274566343 |  |
| 244144_at    | SYNE1            | -1,812418401 | -2,086984744 | 0,274566343 |  |
| 209057_x_at  | CDC5L            | 2,365585359  | 2,091116676  | 0,274468683 |  |
| 225352_at    | SEC62            | 1,774096855  | 1,499637023  | 0,274459832 |  |
| 209919_x_at  | GGT1 /// GGT2 // | 0,228146222  | -0,046302147 | 0,274448369 |  |
| 220570_at    | RETN             | 0,228146222  | -0,046302147 | 0,274448369 |  |
| 226144_at    | REXO1            | 0,228146222  | -0,046302147 | 0,274448369 |  |
| 227292_at    | C11orf84         | 1,139070151  | 0,864649967  | 0,274420183 |  |
| 1552548_at   | BSND             | -1,888254346 | -2,162639771 | 0,274385426 |  |
| 1560958_s_at | -                | -1,888254346 | -2,162639771 | 0,274385426 |  |
| 1561728_a_at | LOC400238        | -1,888254346 | -2,162639771 | 0,274385426 |  |
| 1562754_at   | LOC339260        | -1,888254346 | -2,162639771 | 0,274385426 |  |
| 1562835_at   | -                | -1,888254346 | -2,162639771 | 0,274385426 |  |
| 1564403_at   | C9orf133         | -1,888254346 | -2,162639771 | 0,274385426 |  |
| 1566277_at   | OR5E1P           | -1,888254346 | -2,162639771 | 0,274385426 |  |
| 1569159_at   | LZTS1            | -1,888254346 | -2,162639771 | 0,274385426 |  |
| 205476_at    | CCL20            | -1,888254346 | -2,162639771 | 0,274385426 |  |
| 211648_at    | IGHG1 /// IGHM   | -1,888254346 | -2,162639771 | 0,274385426 |  |

|              |                |              |              |             |  |
|--------------|----------------|--------------|--------------|-------------|--|
| 213228_at    | PDE8B          | -1,888254346 | -2,162639771 | 0,274385426 |  |
| 215120_s_at  | SAMD4A         | -1,888254346 | -2,162639771 | 0,274385426 |  |
| 219684_at    | RTP4           | -1,888254346 | -2,162639771 | 0,274385426 |  |
| 224058_s_at  | HSD17B7P2      | -1,888254346 | -2,162639771 | 0,274385426 |  |
| 230527_at    | -              | -1,888254346 | -2,162639771 | 0,274385426 |  |
| 231485_at    | LOC100505540   | -1,888254346 | -2,162639771 | 0,274385426 |  |
| 234222_at    | -              | -1,888254346 | -2,162639771 | 0,274385426 |  |
| 236299_at    | -              | -1,888254346 | -2,162639771 | 0,274385426 |  |
| 240896_at    | -              | -1,888254346 | -2,162639771 | 0,274385426 |  |
| 242924_at    | -              | -1,888254346 | -2,162639771 | 0,274385426 |  |
| 243160_at    | -              | -1,888254346 | -2,162639771 | 0,274385426 |  |
| 227025_at    | PPHLN1         | 3,285189903  | 3,010820719  | 0,274369184 |  |
| 233132_at    | LOC96610       | 1,339784194  | 1,065442793  | 0,274341401 |  |
| 1554697_at   | ADAMTS9        | -1,763254337 | -2,037551727 | 0,27429739  |  |
| 1554715_at   | LINC00593      | -1,763254337 | -2,037551727 | 0,27429739  |  |
| 1555245_s_at | RP1L1          | -1,763254337 | -2,037551727 | 0,27429739  |  |
| 1557459_at   | -              | -1,763254337 | -2,037551727 | 0,27429739  |  |
| 1558687_a_at | FOXN1          | -1,763254337 | -2,037551727 | 0,27429739  |  |
| 1561192_at   | -              | -1,763254337 | -2,037551727 | 0,27429739  |  |
| 1564083_at   | -              | -1,763254337 | -2,037551727 | 0,27429739  |  |
| 1564963_x_at | ZNF92          | -1,763254337 | -2,037551727 | 0,27429739  |  |
| 1565897_at   | -              | -1,763254337 | -2,037551727 | 0,27429739  |  |
| 1570301_at   | -              | -1,763254337 | -2,037551727 | 0,27429739  |  |
| 1570342_at   | NKTR           | -1,763254337 | -2,037551727 | 0,27429739  |  |
| 205903_s_at  | KCNN3          | -1,763254337 | -2,037551727 | 0,27429739  |  |
| 207148_x_at  | MYOZ2          | -1,763254337 | -2,037551727 | 0,27429739  |  |
| 210634_at    | KLHL20         | -1,763254337 | -2,037551727 | 0,27429739  |  |
| 217500_at    | TIAL1          | -1,763254337 | -2,037551727 | 0,27429739  |  |
| 217666_at    | -              | -1,763254337 | -2,037551727 | 0,27429739  |  |
| 219755_at    | CBX8           | -1,763254337 | -2,037551727 | 0,27429739  |  |
| 230349_at    | XKRX           | -1,763254337 | -2,037551727 | 0,27429739  |  |
| 237523_at    | -              | -1,763254337 | -2,037551727 | 0,27429739  |  |
| 243920_x_at  | -              | -1,763254337 | -2,037551727 | 0,27429739  |  |
| 244329_at    | -              | -1,763254337 | -2,037551727 | 0,27429739  |  |
| 209019_s_at  | PINK1          | 1,314003737  | 1,039887232  | 0,274116505 |  |
| 1552440_at   | GPR182         | -1,937711681 | -2,211750327 | 0,274038646 |  |
| 1561892_at   | ZMYM6          | -1,937711681 | -2,211750327 | 0,274038646 |  |
| 1569005_at   | -              | -1,937711681 | -2,211750327 | 0,274038646 |  |
| 1569787_at   | RFTN1          | -1,937711681 | -2,211750327 | 0,274038646 |  |
| 202526_at    | SMAD4          | -1,937711681 | -2,211750327 | 0,274038646 |  |
| 203535_at    | S100A9         | -1,937711681 | -2,211750327 | 0,274038646 |  |
| 210089_s_at  | LAMA4          | -1,937711681 | -2,211750327 | 0,274038646 |  |
| 211333_s_at  | FASLG          | -1,937711681 | -2,211750327 | 0,274038646 |  |
| 211339_s_at  | ITK            | -1,937711681 | -2,211750327 | 0,274038646 |  |
| 214434_at    | HSPA12A        | -1,937711681 | -2,211750327 | 0,274038646 |  |
| 214644_at    | HIST1H2AK      | -1,937711681 | -2,211750327 | 0,274038646 |  |
| 215838_at    | LILRA5         | -1,937711681 | -2,211750327 | 0,274038646 |  |
| 216877_at    | -              | -1,937711681 | -2,211750327 | 0,274038646 |  |
| 224225_s_at  | ETV7           | -1,937711681 | -2,211750327 | 0,274038646 |  |
| 226953_at    | CADM3 /// DARC | -1,937711681 | -2,211750327 | 0,274038646 |  |
| 227458_at    | CD274          | -1,937711681 | -2,211750327 | 0,274038646 |  |
| 231849_at    | KRT80          | -1,937711681 | -2,211750327 | 0,274038646 |  |
| 233414_at    | -              | -1,937711681 | -2,211750327 | 0,274038646 |  |
| 234786_at    | -              | -1,937711681 | -2,211750327 | 0,274038646 |  |
| 236009_at    | PERP           | -1,937711681 | -2,211750327 | 0,274038646 |  |
| 237472_at    | SOX1           | -1,937711681 | -2,211750327 | 0,274038646 |  |

|              |                  |              |              |             |  |
|--------------|------------------|--------------|--------------|-------------|--|
| 240956_at    | -                | -1,937711681 | -2,211750327 | 0,274038646 |  |
| 241952_at    | SLC16A11         | -1,937711681 | -2,211750327 | 0,274038646 |  |
| 242212_at    | RGS16            | -1,937711681 | -2,211750327 | 0,274038646 |  |
| 243952_at    | TPTEP1           | -1,937711681 | -2,211750327 | 0,274038646 |  |
| 1556616_a_at | -                | 0,171847695  | -0,102100538 | 0,273948233 |  |
| 1561850_at   | LOC100133669     | 0,171847695  | -0,102100538 | 0,273948233 |  |
| 206991_s_at  | CCR5             | 0,171847695  | -0,102100538 | 0,273948233 |  |
| 218810_at    | ZC3H12A          | 0,171847695  | -0,102100538 | 0,273948233 |  |
| 244534_at    | -                | 0,171847695  | -0,102100538 | 0,273948233 |  |
| 204715_at    | PANX1            | 1,85379461   | 1,579853228  | 0,273941381 |  |
| 218130_at    | C17orf62         | 1,85379461   | 1,579853228  | 0,273941381 |  |
| 227822_at    | ZNF605           | 2,094906514  | 1,820984782  | 0,273921733 |  |
| 238990_x_at  | TRIM61           | 1,079110292  | 0,805216064  | 0,273894228 |  |
| 226019_at    | OMA1             | 1,835789711  | 1,562009954  | 0,273779757 |  |
| 220176_at    | NUBPL            | 1,274448124  | 1,000684521  | 0,273763603 |  |
| 233378_at    | -                | 0,945567441  | 0,67181667   | 0,273750771 |  |
| 216095_x_at  | MTMR1            | 2,963199262  | 2,689475799  | 0,273723463 |  |
| 217843_s_at  | MED4             | 4,060873315  | 3,787346121  | 0,273527195 |  |
| 219130_at    | TRMT13           | 3,24026957   | 2,966746113  | 0,273523457 |  |
| 206186_at    | MPP3             | 0,496120222  | 0,222599095  | 0,273521127 |  |
| 226222_at    | KIAA1432         | 0,496120222  | 0,222599095  | 0,273521127 |  |
| 212814_at    | AHCYL2           | 2,048758794  | 1,775255987  | 0,273502807 |  |
| 232740_at    | MCM3AP-AS1       | 0,911589958  | 0,638150376  | 0,273439582 |  |
| 1554545_at   | APOBEC4          | -1,688127507 | -1,961547147 | 0,273419641 |  |
| 1555722_at   | SCAMPER          | -1,688127507 | -1,961547147 | 0,273419641 |  |
| 1564414_a_at | PNLDC1           | -1,688127507 | -1,961547147 | 0,273419641 |  |
| 1569910_at   | -                | -1,688127507 | -1,961547147 | 0,273419641 |  |
| 203540_at    | GFAP             | -1,688127507 | -1,961547147 | 0,273419641 |  |
| 206721_at    | C1orf114         | -1,688127507 | -1,961547147 | 0,273419641 |  |
| 210636_at    | PPARD            | -1,688127507 | -1,961547147 | 0,273419641 |  |
| 211055_s_at  | INVS             | -1,688127507 | -1,961547147 | 0,273419641 |  |
| 215775_at    | THBS1            | -1,688127507 | -1,961547147 | 0,273419641 |  |
| 223800_s_at  | LIMS3 /// LIMS3L | -1,688127507 | -1,961547147 | 0,273419641 |  |
| 226637_at    | UBE2H            | -1,688127507 | -1,961547147 | 0,273419641 |  |
| 227881_s_at  | -                | -1,688127507 | -1,961547147 | 0,273419641 |  |
| 228406_at    | SMYD1            | -1,688127507 | -1,961547147 | 0,273419641 |  |
| 237212_at    | -                | -1,688127507 | -1,961547147 | 0,273419641 |  |
| 240183_at    | TMEM213          | -1,688127507 | -1,961547147 | 0,273419641 |  |
| 242512_at    | MYO9A            | -1,688127507 | -1,961547147 | 0,273419641 |  |
| 244008_at    | PARP8            | -1,688127507 | -1,961547147 | 0,273419641 |  |
| 1552798_a_at | TLR4             | -0,946847173 | -1,220210588 | 0,273363415 |  |
| 1554554_at   | CCDC57           | -0,946847173 | -1,220210588 | 0,273363415 |  |
| 1569912_at   | -                | -0,946847173 | -1,220210588 | 0,273363415 |  |
| 201262_s_at  | BGN              | -0,946847173 | -1,220210588 | 0,273363415 |  |
| 205400_at    | WAS              | -0,946847173 | -1,220210588 | 0,273363415 |  |
| 211184_s_at  | USH1C            | -0,946847173 | -1,220210588 | 0,273363415 |  |
| 217029_at    | -                | -0,946847173 | -1,220210588 | 0,273363415 |  |
| 220543_at    | C21orf62         | -0,946847173 | -1,220210588 | 0,273363415 |  |
| 224527_at    | CDH23 /// LOC10  | -0,946847173 | -1,220210588 | 0,273363415 |  |
| 227052_at    | -                | -0,946847173 | -1,220210588 | 0,273363415 |  |
| 231347_at    | -                | -0,946847173 | -1,220210588 | 0,273363415 |  |
| 232754_at    | -                | -0,946847173 | -1,220210588 | 0,273363415 |  |
| 233510_s_at  | PARVG            | -0,946847173 | -1,220210588 | 0,273363415 |  |
| 238169_at    | -                | -0,946847173 | -1,220210588 | 0,273363415 |  |
| 240064_at    | -                | -0,946847173 | -1,220210588 | 0,273363415 |  |
| 212156_at    | VPS39            | 1,496984567  | 1,223626587  | 0,27335798  |  |

|              |                  |              |              |             |  |
|--------------|------------------|--------------|--------------|-------------|--|
| 213077_at    | YTHDC2           | 2,646022818  | 2,372786857  | 0,273235961 |  |
| 223225_s_at  | SEH1L            | 3,411111015  | 3,137910193  | 0,273199956 |  |
| 224824_at    | COX20            | 4,411731296  | 4,138648509  | 0,273082786 |  |
| 213048_s_at  | -                | 5,521923587  | 5,249050572  | 0,272873015 |  |
| 1559277_at   | FLJ35700         | -2,01371626  | -2,286583451 | 0,27286719  |  |
| 1562399_at   | -                | -2,01371626  | -2,286583451 | 0,27286719  |  |
| 205366_s_at  | HOXB6            | -2,01371626  | -2,286583451 | 0,27286719  |  |
| 205472_s_at  | DACH1            | -2,01371626  | -2,286583451 | 0,27286719  |  |
| 208434_at    | MECOM            | -2,01371626  | -2,286583451 | 0,27286719  |  |
| 209498_at    | CEACAM1          | -2,01371626  | -2,286583451 | 0,27286719  |  |
| 209686_at    | S100B            | -2,01371626  | -2,286583451 | 0,27286719  |  |
| 210227_at    | DLGAP2           | -2,01371626  | -2,286583451 | 0,27286719  |  |
| 215249_at    | RPL35A           | -2,01371626  | -2,286583451 | 0,27286719  |  |
| 215893_x_at  | -                | -2,01371626  | -2,286583451 | 0,27286719  |  |
| 222836_at    | NAA15            | -2,01371626  | -2,286583451 | 0,27286719  |  |
| 228431_at    | NFYA             | -2,01371626  | -2,286583451 | 0,27286719  |  |
| 229476_s_at  | THRSP            | -2,01371626  | -2,286583451 | 0,27286719  |  |
| 229580_at    | -                | -2,01371626  | -2,286583451 | 0,27286719  |  |
| 231257_at    | TCERG1L          | -2,01371626  | -2,286583451 | 0,27286719  |  |
| 231444_at    | LOC100506216     | -2,01371626  | -2,286583451 | 0,27286719  |  |
| 233699_at    | -                | -2,01371626  | -2,286583451 | 0,27286719  |  |
| 236851_x_at  | -                | -2,01371626  | -2,286583451 | 0,27286719  |  |
| 240526_at    | -                | -2,01371626  | -2,286583451 | 0,27286719  |  |
| 240816_at    | -                | -2,01371626  | -2,286583451 | 0,27286719  |  |
| 241228_at    | -                | -2,01371626  | -2,286583451 | 0,27286719  |  |
| 242654_at    | FANCC            | -2,01371626  | -2,286583451 | 0,27286719  |  |
| 242752_at    | -                | -2,01371626  | -2,286583451 | 0,27286719  |  |
| 244274_at    | -                | -2,01371626  | -2,286583451 | 0,27286719  |  |
| 222175_s_at  | MED15            | 1,177702228  | 0,904843258  | 0,272858969 |  |
| 1559600_at   | -                | 0,052199481  | -0,220592223 | 0,272791704 |  |
| 208505_s_at  | FUT2             | 0,052199481  | -0,220592223 | 0,272791704 |  |
| 214474_at    | PRKAB2           | 0,052199481  | -0,220592223 | 0,272791704 |  |
| 238056_at    | SDHC             | 0,052199481  | -0,220592223 | 0,272791704 |  |
| 239217_x_at  | ABCC3            | 0,052199481  | -0,220592223 | 0,272791704 |  |
| 202326_at    | EHMT2            | 0,841135803  | 0,568365095  | 0,272770708 |  |
| 208960_s_at  | KLF6             | 0,841135803  | 0,568365095  | 0,272770708 |  |
| 201151_s_at  | MBNL1            | 3,321224383  | 3,048471686  | 0,272752697 |  |
| 48031_r_at   | C5orf4           | 1,58225013   | 1,309546674  | 0,272703455 |  |
| 1562431_x_at | -                | -3,07502285  | -3,347710726 | 0,272687876 |  |
| 221573_at    | C7orf25 /// PSMA | 0,401366113  | 0,128747141  | 0,272618972 |  |
| 201612_at    | ALDH9A1          | 4,652328451  | 4,379770162  | 0,272558288 |  |
| 1562265_at   | -                | -1,639579028 | -1,912089812 | 0,272510784 |  |
| 1565407_at   | LHX9             | -1,639579028 | -1,912089812 | 0,272510784 |  |
| 1565868_at   | CD44             | -1,639579028 | -1,912089812 | 0,272510784 |  |
| 205081_at    | CRIP1            | -1,639579028 | -1,912089812 | 0,272510784 |  |
| 207341_at    | PRTN3            | -1,639579028 | -1,912089812 | 0,272510784 |  |
| 214650_x_at  | MOG              | -1,639579028 | -1,912089812 | 0,272510784 |  |
| 215259_s_at  | CADM4            | -1,639579028 | -1,912089812 | 0,272510784 |  |
| 216046_at    | -                | -1,639579028 | -1,912089812 | 0,272510784 |  |
| 222484_s_at  | CXCL14           | -1,639579028 | -1,912089812 | 0,272510784 |  |
| 227734_s_at  | ZNHIT2           | -1,639579028 | -1,912089812 | 0,272510784 |  |
| 231935_at    | ARPP21           | -1,639579028 | -1,912089812 | 0,272510784 |  |
| 233708_at    | -                | -1,639579028 | -1,912089812 | 0,272510784 |  |
| 237542_at    | -                | -1,639579028 | -1,912089812 | 0,272510784 |  |
| 237916_at    | -                | -1,639579028 | -1,912089812 | 0,272510784 |  |
| 239494_at    | -                | -1,639579028 | -1,912089812 | 0,272510784 |  |

|              |                    |              |              |             |  |
|--------------|--------------------|--------------|--------------|-------------|--|
| 239714_at    | -                  | -1,639579028 | -1,912089812 | 0,272510784 |  |
| 243182_at    | -                  | -1,639579028 | -1,912089812 | 0,272510784 |  |
| 243357_at    | NEGR1              | -1,639579028 | -1,912089812 | 0,272510784 |  |
| 244026_at    | -                  | -1,639579028 | -1,912089812 | 0,272510784 |  |
| 220171_x_at  | KIAA1704           | 2,889473182  | 2,617011906  | 0,272461276 |  |
| 1563754_at   | GRIK2              | -2,866296344 | -3,138626879 | 0,272330535 |  |
| 1564160_at   | DTHD1              | -2,866296344 | -3,138626879 | 0,272330535 |  |
| 1569566_at   | TBC1D1             | -2,866296344 | -3,138626879 | 0,272330535 |  |
| 1570302_at   | -                  | -2,866296344 | -3,138626879 | 0,272330535 |  |
| 206624_at    | USP9Y              | -2,866296344 | -3,138626879 | 0,272330535 |  |
| 232010_at    | FSTL5              | -2,866296344 | -3,138626879 | 0,272330535 |  |
| 240050_s_at  | -                  | -2,866296344 | -3,138626879 | 0,272330535 |  |
| 204490_s_at  | CD44               | 1,683039483  | 1,410714371  | 0,272325111 |  |
| 222422_s_at  | NDFIP1             | 1,683039483  | 1,410714371  | 0,272325111 |  |
| 235588_at    | ESCO2              | 1,683039483  | 1,410714371  | 0,272325111 |  |
| 226899_at    | UNC5B              | 2,022468633  | 1,750261389  | 0,272207245 |  |
| 1553220_at   | FAM117B            | 0,351548291  | 0,079428135  | 0,272120156 |  |
| 205536_at    | VAV2               | 0,351548291  | 0,079428135  | 0,272120156 |  |
| 214428_x_at  | C4A /// C4B /// LC | 0,351548291  | 0,079428135  | 0,272120156 |  |
| 230003_at    | -                  | 0,351548291  | 0,079428135  | 0,272120156 |  |
| 242938_s_at  | FOXK2              | 0,351548291  | 0,079428135  | 0,272120156 |  |
| 226513_at    | ASB7               | 1,844820248  | 1,572742379  | 0,272077869 |  |
| 200034_s_at  | RPL6               | 7,737656461  | 7,465596184  | 0,272060277 |  |
| 1554514_at   | ACSM5              | -2,063149277 | -2,335104118 | 0,27195484  |  |
| 1555298_a_at | VWA3B              | -2,063149277 | -2,335104118 | 0,27195484  |  |
| 1556381_at   | NAA15              | -2,063149277 | -2,335104118 | 0,27195484  |  |
| 214018_at    | GRIP1              | -2,063149277 | -2,335104118 | 0,27195484  |  |
| 217423_at    | -                  | -2,063149277 | -2,335104118 | 0,27195484  |  |
| 219858_s_at  | MFSD6              | -2,063149277 | -2,335104118 | 0,27195484  |  |
| 220148_at    | ALDH8A1            | -2,063149277 | -2,335104118 | 0,27195484  |  |
| 231128_at    | FAM181B            | -2,063149277 | -2,335104118 | 0,27195484  |  |
| 232998_at    | TIGD4              | -2,063149277 | -2,335104118 | 0,27195484  |  |
| 236323_at    | PVRL3-AS1          | -2,063149277 | -2,335104118 | 0,27195484  |  |
| 237936_at    | -                  | -2,063149277 | -2,335104118 | 0,27195484  |  |
| 238048_at    | -                  | -2,063149277 | -2,335104118 | 0,27195484  |  |
| 238744_at    | -                  | -2,063149277 | -2,335104118 | 0,27195484  |  |
| 240047_at    | -                  | -2,063149277 | -2,335104118 | 0,27195484  |  |
| 240856_at    | O3FAR1             | -2,063149277 | -2,335104118 | 0,27195484  |  |
| 241659_at    | JMJD1C             | -2,063149277 | -2,335104118 | 0,27195484  |  |
| 244031_at    | -                  | -2,063149277 | -2,335104118 | 0,27195484  |  |
| 223215_s_at  | JKAMP              | 4,537271727  | 4,265343974  | 0,271927753 |  |
| 200854_at    | NCOR1              | 2,807162789  | 2,53523821   | 0,271924579 |  |
| 227237_x_at  | ATAD3B             | 3,547344317  | 3,275657468  | 0,271686848 |  |
| 1555274_a_at | EPT1               | 3,21379258   | 2,942125533  | 0,271667046 |  |
| 227285_at    | C1orf51            | 0,728550685  | 0,456918297  | 0,271632388 |  |
| 213836_s_at  | WIPI1              | 1,789769151  | 1,518263577  | 0,271505574 |  |
| 209181_s_at  | RABGGTB /// SN     | 5,644425553  | 5,372936243  | 0,27148931  |  |
| 1553725_s_at | ZNF644             | 1,530951994  | 1,259496994  | 0,271454999 |  |
| 228039_at    | DDX46              | 1,530951994  | 1,259496994  | 0,271454999 |  |
| 226521_s_at  | FAM175A            | 2,72965419   | 2,458228496  | 0,271425694 |  |
| 1553224_at   | LUZP1              | -1,591296941 | -1,862647763 | 0,271350821 |  |
| 1555392_at   | -                  | -1,591296941 | -1,862647763 | 0,271350821 |  |
| 1558607_at   | PAPPA              | -1,591296941 | -1,862647763 | 0,271350821 |  |
| 1558698_at   | ZNF264             | -1,591296941 | -1,862647763 | 0,271350821 |  |
| 1559686_a_at | LOC100506379       | -1,591296941 | -1,862647763 | 0,271350821 |  |
| 1562099_at   | -                  | -1,591296941 | -1,862647763 | 0,271350821 |  |

|              |                 |              |              |             |  |
|--------------|-----------------|--------------|--------------|-------------|--|
| 201283_s_at  | TRAK1           | -1,591296941 | -1,862647763 | 0,271350821 |  |
| 203407_at    | PPL             | -1,591296941 | -1,862647763 | 0,271350821 |  |
| 206605_at    | ENDOU           | -1,591296941 | -1,862647763 | 0,271350821 |  |
| 206663_at    | SP4             | -1,591296941 | -1,862647763 | 0,271350821 |  |
| 207972_at    | GLRA1           | -1,591296941 | -1,862647763 | 0,271350821 |  |
| 208228_s_at  | FGFR2           | -1,591296941 | -1,862647763 | 0,271350821 |  |
| 210791_s_at  | ARHGAP32        | -1,591296941 | -1,862647763 | 0,271350821 |  |
| 211045_s_at  | KCNH6           | -1,591296941 | -1,862647763 | 0,271350821 |  |
| 211372_s_at  | IL1R2           | -1,591296941 | -1,862647763 | 0,271350821 |  |
| 213898_at    | RBFOX2          | -1,591296941 | -1,862647763 | 0,271350821 |  |
| 214366_s_at  | ALOX5           | -1,591296941 | -1,862647763 | 0,271350821 |  |
| 222086_s_at  | WNT6            | -1,591296941 | -1,862647763 | 0,271350821 |  |
| 231687_at    | -               | -1,591296941 | -1,862647763 | 0,271350821 |  |
| 233187_s_at  | -               | -1,591296941 | -1,862647763 | 0,271350821 |  |
| 243133_at    | TSC22D1         | -1,591296941 | -1,862647763 | 0,271350821 |  |
| 206928_at    | ZNF124          | 2,061726373  | 1,790660532  | 0,271065841 |  |
| 1557170_at   | NEK8            | 0,246434561  | -0,024572586 | 0,271007147 |  |
| 207766_at    | CDKL1           | 0,246434561  | -0,024572586 | 0,271007147 |  |
| 219627_at    | ZNF767          | 0,995078803  | 0,724100169  | 0,270978634 |  |
| 1555247_a_at | FNIP1 /// RAPGE | 2,59162628   | 2,320681318  | 0,270944962 |  |
| 225658_at    | SPOPL           | 1,732533761  | 1,461646549  | 0,270887212 |  |
| 208012_x_at  | SP110           | 3,046446467  | 2,775606361  | 0,270840106 |  |
| 239346_at    | -               | 3,569303935  | 3,298466943  | 0,270836991 |  |
| 210257_x_at  | CUL4B           | 2,842156496  | 2,571362843  | 0,270793653 |  |
| 226832_at    | RNF168          | 2,943717636  | 2,672945617  | 0,270772019 |  |
| 204180_s_at  | ZBTB43          | 0,648296226  | 0,377530647  | 0,270765579 |  |
| 204629_at    | PARVB           | 0,648296226  | 0,377530647  | 0,270765579 |  |
| 219314_s_at  | ZNF219          | 0,648296226  | 0,377530647  | 0,270765579 |  |
| 219530_at    | PALB2           | 2,637386731  | 2,366632651  | 0,27075408  |  |
| 204618_s_at  | GABPB1          | 2,861566439  | 2,590852465  | 0,270713974 |  |
| 222448_s_at  | CMPK1           | 4,06796029   | 3,797294336  | 0,270665954 |  |
| 208649_s_at  | VCP             | 4,342753543  | 4,072129637  | 0,270623905 |  |
| 235346_at    | FUNDC1          | 4,085209408  | 3,814728712  | 0,270480696 |  |
| 1554178_a_at | FAM126B         | -0,148196756 | -0,41858459  | 0,270387833 |  |
| 231481_at    | CCNB3           | -0,148196756 | -0,41858459  | 0,270387833 |  |
| 229013_at    | LOC145783       | 1,360921491  | 1,090553537  | 0,270367954 |  |
| 232076_at    | ZNF707          | 0,606430281  | 0,336136178  | 0,270294104 |  |
| 203739_at    | ZNF217          | 3,831009889  | 3,560823412  | 0,270186477 |  |
| 222553_x_at  | OXR1            | 3,761974695  | 3,491815843  | 0,270158852 |  |
| 213459_at    | RPL37A          | 2,236584753  | 1,966439221  | 0,270145532 |  |
| 1555922_at   | C10orf114       | 1,758252436  | 1,488344553  | 0,269907884 |  |
| 1555963_x_at | B3GNT7          | -2,138804305 | -2,408705138 | 0,269900832 |  |
| 1558658_at   | ZNF391          | -2,138804305 | -2,408705138 | 0,269900832 |  |
| 1560642_at   | -               | -2,138804305 | -2,408705138 | 0,269900832 |  |
| 1562372_at   | SV2C            | -2,138804305 | -2,408705138 | 0,269900832 |  |
| 1563614_at   | MTBP            | -2,138804305 | -2,408705138 | 0,269900832 |  |
| 1569931_at   | -               | -2,138804305 | -2,408705138 | 0,269900832 |  |
| 209396_s_at  | CHI3L1          | -2,138804305 | -2,408705138 | 0,269900832 |  |
| 211883_x_at  | CEACAM1         | -2,138804305 | -2,408705138 | 0,269900832 |  |
| 214945_at    | FAM153A /// FAM | -2,138804305 | -2,408705138 | 0,269900832 |  |
| 214954_at    | SUSD5           | -2,138804305 | -2,408705138 | 0,269900832 |  |
| 216148_at    | -               | -2,138804305 | -2,408705138 | 0,269900832 |  |
| 229634_at    | TMEM139         | -2,138804305 | -2,408705138 | 0,269900832 |  |
| 230861_at    | DKFZP434L187    | -2,138804305 | -2,408705138 | 0,269900832 |  |
| 233497_at    | -               | -2,138804305 | -2,408705138 | 0,269900832 |  |
| 236645_at    | LOC100506312    | -2,138804305 | -2,408705138 | 0,269900832 |  |

|              |                 |              |              |             |  |
|--------------|-----------------|--------------|--------------|-------------|--|
| 240025_x_at  | -               | -2,138804305 | -2,408705138 | 0,269900832 |  |
| 244670_at    | -               | -2,138804305 | -2,408705138 | 0,269900832 |  |
| 213599_at    | OIP5            | 4,00557508   | 3,735753654  | 0,269821426 |  |
| 202346_at    | UBE2K           | 4,256842836  | 3,987098381  | 0,269744455 |  |
| 223429_x_at  | ISY1            | 3,62627949   | 3,356551164  | 0,269728326 |  |
| 223925_s_at  | -               | 1,894952274  | 1,6252386    | 0,269713673 |  |
| 228991_at    | CDK13           | 1,894952274  | 1,6252386    | 0,269713673 |  |
| 209179_s_at  | MBOAT7          | 3,984619786  | 3,714911743  | 0,269708043 |  |
| 243280_at    | -               | 0,133056859  | -0,136643983 | 0,269700841 |  |
| 221513_s_at  | UTP14A /// UTP1 | 2,310153708  | 2,040470494  | 0,269683214 |  |
| 223253_at    | EPDR1           | 3,882346871  | 3,6128809    | 0,269465972 |  |
| 1561651_s_at | TAL1            | 0,859074518  | 0,589657387  | 0,269417131 |  |
| 225919_s_at  | C9orf72         | 0,859074518  | 0,589657387  | 0,269417131 |  |
| 218215_s_at  | NR1H2           | 1,542099044  | 1,272721751  | 0,269377293 |  |
| 218278_at    | WDR74           | 3,536237877  | 3,266872397  | 0,26936548  |  |
| 203165_s_at  | SLC33A1         | 2,003776245  | 1,73441697   | 0,269359275 |  |
| 203226_s_at  | TSPAN31         | 2,003776245  | 1,73441697   | 0,269359275 |  |
| 212060_at    | U2SURP          | 3,373122675  | 3,103784293  | 0,269338382 |  |
| 227402_s_at  | UTP23           | 3,373122675  | 3,103784293  | 0,269338382 |  |
| 203767_s_at  | STS             | -0,221656139 | -0,490927335 | 0,269271197 |  |
| 206703_at    | CHRNA1          | -0,221656139 | -0,490927335 | 0,269271197 |  |
| 208299_at    | CACNA1I         | -0,221656139 | -0,490927335 | 0,269271197 |  |
| 216887_s_at  | LDB3            | -0,221656139 | -0,490927335 | 0,269271197 |  |
| 229112_at    | SIRT5           | -0,221656139 | -0,490927335 | 0,269271197 |  |
| 237388_at    | -               | -0,221656139 | -0,490927335 | 0,269271197 |  |
| 241084_x_at  | DYNC1H1         | -0,221656139 | -0,490927335 | 0,269271197 |  |
| 232103_at    | BPNT1           | 1,104397092  | 0,835239052  | 0,26915804  |  |
| 201352_at    | YME1L1          | 5,629479193  | 5,360344676  | 0,269134517 |  |
| 225094_at    | SETD8           | 2,227406889  | 1,958277216  | 0,269129673 |  |
| 1555033_a_at | RGS12           | -1,518072576 | -1,787089803 | 0,269017228 |  |
| 1556801_at   | LOC400794       | -1,518072576 | -1,787089803 | 0,269017228 |  |
| 1561056_a_at | -               | -1,518072576 | -1,787089803 | 0,269017228 |  |
| 1564821_at   | -               | -1,518072576 | -1,787089803 | 0,269017228 |  |
| 1569644_at   | -               | -1,518072576 | -1,787089803 | 0,269017228 |  |
| 207866_at    | BMP8A           | -1,518072576 | -1,787089803 | 0,269017228 |  |
| 219734_at    | SIDT1           | -1,518072576 | -1,787089803 | 0,269017228 |  |
| 221312_at    | GLP2R           | -1,518072576 | -1,787089803 | 0,269017228 |  |
| 226534_at    | KITLG           | -1,518072576 | -1,787089803 | 0,269017228 |  |
| 228025_s_at  | PPP2R2C         | -1,518072576 | -1,787089803 | 0,269017228 |  |
| 231183_s_at  | JAG1            | -1,518072576 | -1,787089803 | 0,269017228 |  |
| 232538_at    | -               | -1,518072576 | -1,787089803 | 0,269017228 |  |
| 234931_at    | -               | -1,518072576 | -1,787089803 | 0,269017228 |  |
| 236034_at    | ANGPT2          | -1,518072576 | -1,787089803 | 0,269017228 |  |
| 237204_at    | -               | -1,518072576 | -1,787089803 | 0,269017228 |  |
| 239705_at    | -               | -1,518072576 | -1,787089803 | 0,269017228 |  |
| 241383_at    | ZNF385C         | -1,518072576 | -1,787089803 | 0,269017228 |  |
| 227096_at    | JOSD2           | 0,822971223  | 0,553993624  | 0,268977599 |  |
| 1552987_a_at | MGC42157        | -2,908843709 | -3,177802286 | 0,268958577 |  |
| 1559930_at   | -               | -2,908843709 | -3,177802286 | 0,268958577 |  |
| 1566551_at   | -               | -2,908843709 | -3,177802286 | 0,268958577 |  |
| 1569213_at   | LOC400891       | -2,908843709 | -3,177802286 | 0,268958577 |  |
| 215314_at    | -               | -2,908843709 | -3,177802286 | 0,268958577 |  |
| 231969_at    | STOX2           | -2,908843709 | -3,177802286 | 0,268958577 |  |
| 243281_at    | -               | -2,908843709 | -3,177802286 | 0,268958577 |  |
| 1560986_a_at | -               | 0,072842263  | -0,19610998  | 0,268952243 |  |
| 200733_s_at  | PTP4A1          | 5,647439343  | 5,378554049  | 0,268885294 |  |



|              |                 |              |              |             |  |
|--------------|-----------------|--------------|--------------|-------------|--|
| 215980_s_at  | IGHMBP2         | 0,702292136  | 0,433557298  | 0,268734838 |  |
| 201899_s_at  | UBE2A           | 4,325653301  | 4,056921713  | 0,268731588 |  |
| 202211_at    | ARFGAP3         | 4,114752306  | 3,846031735  | 0,268720571 |  |
| 223584_s_at  | KBTBD2          | 1,422536444  | 1,153866761  | 0,268669683 |  |
| 235162_at    | MDM4            | 0,97328325   | 0,704715219  | 0,268568031 |  |
| 242727_at    | ARL5B           | 0,97328325   | 0,704715219  | 0,268568031 |  |
| 1553430_a_at | EDARADD         | -0,741668563 | -1,010192375 | 0,268523812 |  |
| 1563560_at   | AHNAK           | -0,741668563 | -1,010192375 | 0,268523812 |  |
| 214251_s_at  | NUMA1           | -0,741668563 | -1,010192375 | 0,268523812 |  |
| 216879_at    | HR44            | -0,741668563 | -1,010192375 | 0,268523812 |  |
| 220912_at    | -               | -0,741668563 | -1,010192375 | 0,268523812 |  |
| 223751_x_at  | TLR10           | -0,741668563 | -1,010192375 | 0,268523812 |  |
| 223953_s_at  | ZBTB37          | -0,741668563 | -1,010192375 | 0,268523812 |  |
| 230084_at    | SLC30A2         | -0,741668563 | -1,010192375 | 0,268523812 |  |
| 233998_x_at  | -               | -0,741668563 | -1,010192375 | 0,268523812 |  |
| 236311_at    | LOH12CR2        | -0,741668563 | -1,010192375 | 0,268523812 |  |
| 239097_at    | FRRS1L          | -0,741668563 | -1,010192375 | 0,268523812 |  |
| 242213_at    | -               | -0,741668563 | -1,010192375 | 0,268523812 |  |
| 242308_at    | MCOLN3          | -0,741668563 | -1,010192375 | 0,268523812 |  |
| 242593_at    | -               | -0,741668563 | -1,010192375 | 0,268523812 |  |
| 204250_s_at  | CEP164          | -0,496991414 | -0,765504029 | 0,268512615 |  |
| 207275_s_at  | ACSL1           | -0,496991414 | -0,765504029 | 0,268512615 |  |
| 216174_at    | HCRP1           | -0,496991414 | -0,765504029 | 0,268512615 |  |
| 230616_at    | LAMB2P1         | -0,496991414 | -0,765504029 | 0,268512615 |  |
| 230862_at    | -               | -0,496991414 | -0,765504029 | 0,268512615 |  |
| 232857_at    | POLR3H          | -0,496991414 | -0,765504029 | 0,268512615 |  |
| 1561759_at   | LOC100507322 /  | -2,187914861 | -2,456406426 | 0,268491565 |  |
| 1562822_at   | -               | -2,187914861 | -2,456406426 | 0,268491565 |  |
| 1563171_at   | -               | -2,187914861 | -2,456406426 | 0,268491565 |  |
| 1564067_x_at | TMEM151B        | -2,187914861 | -2,456406426 | 0,268491565 |  |
| 1564075_a_at | C17orf104       | -2,187914861 | -2,456406426 | 0,268491565 |  |
| 1567687_at   | CECR9           | -2,187914861 | -2,456406426 | 0,268491565 |  |
| 214461_at    | LBP             | -2,187914861 | -2,456406426 | 0,268491565 |  |
| 216643_at    | -               | -2,187914861 | -2,456406426 | 0,268491565 |  |
| 217320_at    | -               | -2,187914861 | -2,456406426 | 0,268491565 |  |
| 225817_at    | CGNL1           | -2,187914861 | -2,456406426 | 0,268491565 |  |
| 233927_at    | -               | -2,187914861 | -2,456406426 | 0,268491565 |  |
| 234085_at    | CCDC169         | -2,187914861 | -2,456406426 | 0,268491565 |  |
| 234243_at    | RPF1            | -2,187914861 | -2,456406426 | 0,268491565 |  |
| 243988_at    | -               | -2,187914861 | -2,456406426 | 0,268491565 |  |
| 36711_at     | MAFF            | 3,337310811  | 3,068831572  | 0,26847924  |  |
| 231864_at    | ZNF33A          | 1,638726528  | 1,370274469  | 0,268452059 |  |
| 1555772_a_at | CDC25A          | 1,201332287  | 0,932882274  | 0,268450013 |  |
| 208523_x_at  | HIST1H2BC /// H | 4,895163777  | 4,626777417  | 0,26838636  |  |
| 201798_s_at  | MYOF            | 0,661985843  | 0,393761504  | 0,268224338 |  |
| 206219_s_at  | VAV1            | 0,661985843  | 0,393761504  | 0,268224338 |  |
| 200979_at    | PDHA1           | 3,101484927  | 2,833274877  | 0,26821005  |  |
| 201889_at    | FAM3C           | 5,950110119  | 5,681974705  | 0,268135414 |  |
| 206554_x_at  | SETMAR          | 0,425644434  | 0,157549243  | 0,268095191 |  |
| 241411_at    | -               | 0,425644434  | 0,157549243  | 0,268095191 |  |
| 203480_s_at  | OTUD4           | 3,69530589   | 3,427247355  | 0,268058535 |  |
| 1556739_at   | GOLGA8IP        | -0,299034815 | -0,566887459 | 0,267852645 |  |
| 1563607_x_at | LOC286359       | -0,299034815 | -0,566887459 | 0,267852645 |  |
| 230640_at    | -               | -0,299034815 | -0,566887459 | 0,267852645 |  |
| 234135_x_at  | -               | -0,299034815 | -0,566887459 | 0,267852645 |  |
| 237136_at    | -               | -0,299034815 | -0,566887459 | 0,267852645 |  |

|              |              |              |              |             |  |
|--------------|--------------|--------------|--------------|-------------|--|
| 226083_at    | TMEM70       | 1,960118853  | 1,692388143  | 0,267730711 |  |
| 211217_s_at  | KCNQ1        | 1,348276312  | 1,080561626  | 0,267714686 |  |
| 203289_s_at  | NPRL3        | 1,143956113  | 0,876248481  | 0,267707632 |  |
| 203542_s_at  | KLF9         | 1,143956113  | 0,876248481  | 0,267707632 |  |
| 224248_x_at  | FAM192A      | 2,760204767  | 2,492544876  | 0,267659891 |  |
| 211988_at    | SMARCE1      | 4,604390697  | 4,336867701  | 0,267522995 |  |
| 202069_s_at  | IDH3A        | 3,621908408  | 3,354479478  | 0,267428931 |  |
| 226016_at    | CD47         | 3,791855421  | 3,524430539  | 0,267424882 |  |
| 219056_at    | RNASEH2B     | 1,504602299  | 1,23718272   | 0,267419579 |  |
| 230141_at    | ARID4A       | 1,504602299  | 1,23718272   | 0,267419579 |  |
| 202090_s_at  | UQCR11       | 5,924161742  | 5,656766959  | 0,267394783 |  |
| 220943_s_at  | C2orf56      | 1,114389003  | 0,847075464  | 0,26731354  |  |
| 228090_at    | NMNAT3       | 1,926486359  | 1,659204017  | 0,267282343 |  |
| 1560706_at   | NEDD9        | -1,470833215 | -1,738067356 | 0,267234141 |  |
| 1569318_at   | LOC284440    | -1,470833215 | -1,738067356 | 0,267234141 |  |
| 206021_at    | SCAND2       | -1,470833215 | -1,738067356 | 0,267234141 |  |
| 207009_at    | PHOX2B       | -1,470833215 | -1,738067356 | 0,267234141 |  |
| 208028_s_at  | GPX5         | -1,470833215 | -1,738067356 | 0,267234141 |  |
| 210660_at    | LILRA1       | -1,470833215 | -1,738067356 | 0,267234141 |  |
| 211147_s_at  | P2RX6        | -1,470833215 | -1,738067356 | 0,267234141 |  |
| 215104_at    | NRIP2        | -1,470833215 | -1,738067356 | 0,267234141 |  |
| 216118_at    | -            | -1,470833215 | -1,738067356 | 0,267234141 |  |
| 220902_at    | -            | -1,470833215 | -1,738067356 | 0,267234141 |  |
| 229767_at    | TBCD         | -1,470833215 | -1,738067356 | 0,267234141 |  |
| 230499_at    | BIRC3        | -1,470833215 | -1,738067356 | 0,267234141 |  |
| 230911_at    | SIX1         | -1,470833215 | -1,738067356 | 0,267234141 |  |
| 234838_at    | -            | -1,470833215 | -1,738067356 | 0,267234141 |  |
| 238881_at    | -            | -1,470833215 | -1,738067356 | 0,267234141 |  |
| 240740_at    | LOC100507443 | -1,470833215 | -1,738067356 | 0,267234141 |  |
| 243192_at    | -            | -1,470833215 | -1,738067356 | 0,267234141 |  |
| 243456_at    | ZNF214       | -1,470833215 | -1,738067356 | 0,267234141 |  |
| 244709_at    | FAM123C      | -1,470833215 | -1,738067356 | 0,267234141 |  |
| 222571_at    | ST6GALNAC6   | 0,87091093   | 0,603679647  | 0,267231283 |  |
| 1556328_at   | -            | -0,055687482 | -0,322870281 | 0,267182799 |  |
| 220808_at    | THEG         | -0,055687482 | -0,322870281 | 0,267182799 |  |
| 230254_at    | FAM26E       | -0,055687482 | -0,322870281 | 0,267182799 |  |
| 235167_at    | LOC100190986 | -0,055687482 | -0,322870281 | 0,267182799 |  |
| 236807_at    | -            | -0,055687482 | -0,322870281 | 0,267182799 |  |
| 240381_at    | ZBED5        | -0,055687482 | -0,322870281 | 0,267182799 |  |
| 1554153_a_at | PHF21A       | 0,57782909   | 0,310717132  | 0,267111959 |  |
| 1554401_a_at | TCTE3        | -2,236765673 | -2,503677622 | 0,26691195  |  |
| 1556706_at   | -            | -2,236765673 | -2,503677622 | 0,26691195  |  |
| 1559911_at   | -            | -2,236765673 | -2,503677622 | 0,26691195  |  |
| 1563112_at   | -            | -2,236765673 | -2,503677622 | 0,26691195  |  |
| 1563985_at   | -            | -2,236765673 | -2,503677622 | 0,26691195  |  |
| 1570231_at   | LATS1        | -2,236765673 | -2,503677622 | 0,26691195  |  |
| 217090_at    | -            | -2,236765673 | -2,503677622 | 0,26691195  |  |
| 228665_at    | CYYR1        | -2,236765673 | -2,503677622 | 0,26691195  |  |
| 231956_at    | RNF213       | -2,236765673 | -2,503677622 | 0,26691195  |  |
| 233581_at    | -            | -2,236765673 | -2,503677622 | 0,26691195  |  |
| 237564_at    | -            | -2,236765673 | -2,503677622 | 0,26691195  |  |
| 238891_at    | -            | -2,236765673 | -2,503677622 | 0,26691195  |  |
| 241145_at    | -            | -2,236765673 | -2,503677622 | 0,26691195  |  |
| 213049_at    | RALGAPA1     | 2,901063789  | 2,634191677  | 0,266872112 |  |
| 225640_at    | LOC100506710 | 2,764969948  | 2,498185745  | 0,266784203 |  |
| 228652_at    | ZNF776       | 3,319065909  | 3,052311115  | 0,266754794 |  |

|              |                 |              |              |             |  |
|--------------|-----------------|--------------|--------------|-------------|--|
| 227200_at    | ETV3            | 3,188003814  | 2,921282473  | 0,266721341 |  |
| 202314_at    | CYP51A1 /// LRR | 3,586454644  | 3,319860027  | 0,266594617 |  |
| 209804_at    | DCLRE1A         | 1,381753566  | 1,115234684  | 0,266518882 |  |
| 208424_s_at  | CIAPIN1         | 3,327680494  | 3,061230246  | 0,266450248 |  |
| 227410_at    | FAM43A          | 1,735773781  | 1,469325098  | 0,266448683 |  |
| 1559715_at   | LOC100507391    | -0,888496123 | -1,154897679 | 0,266401556 |  |
| 1560698_a_at | TRHDE-AS1       | -0,888496123 | -1,154897679 | 0,266401556 |  |
| 1564548_at   | LOC642620       | -0,888496123 | -1,154897679 | 0,266401556 |  |
| 207093_s_at  | OMG             | -0,888496123 | -1,154897679 | 0,266401556 |  |
| 211327_x_at  | HFE             | -0,888496123 | -1,154897679 | 0,266401556 |  |
| 213023_at    | UTRN            | -0,888496123 | -1,154897679 | 0,266401556 |  |
| 220598_at    | CARD14          | -0,888496123 | -1,154897679 | 0,266401556 |  |
| 229683_s_at  | KCTD15          | -0,888496123 | -1,154897679 | 0,266401556 |  |
| 231944_at    | ERO1LB          | -0,888496123 | -1,154897679 | 0,266401556 |  |
| 240040_at    | PSTK            | -0,888496123 | -1,154897679 | 0,266401556 |  |
| 241064_at    | -               | -0,888496123 | -1,154897679 | 0,266401556 |  |
| 242896_at    | -               | -0,888496123 | -1,154897679 | 0,266401556 |  |
| 242949_x_at  | CCDC157         | -0,888496123 | -1,154897679 | 0,266401556 |  |
| 244375_at    | -               | -0,888496123 | -1,154897679 | 0,266401556 |  |
| 205415_s_at  | ATXN3           | 2,485917452  | 2,21959457   | 0,266322881 |  |
| 205787_x_at  | ZC3H11A         | 0,798390451  | 0,532164371  | 0,26622608  |  |
| 220243_at    | ZBTB44          | 0,798390451  | 0,532164371  | 0,26622608  |  |
| 241606_s_at  | TRUB1           | 0,798390451  | 0,532164371  | 0,26622608  |  |
| 227084_at    | DTNA            | 1,968405881  | 1,702196344  | 0,266209537 |  |
| 228365_at    | CPNE8           | 1,968405881  | 1,702196344  | 0,266209537 |  |
| 202768_at    | FOSB            | 1,512180019  | 1,246149888  | 0,266030131 |  |
| 242304_at    | WIBG            | 1,512180019  | 1,246149888  | 0,266030131 |  |
| 1556560_a_at | LOC100128071    | 0,273439642  | 0,007421914  | 0,266017728 |  |
| 205655_at    | MDM4            | 0,273439642  | 0,007421914  | 0,266017728 |  |
| 232819_s_at  | LTBR            | 0,273439642  | 0,007421914  | 0,266017728 |  |
| 224571_at    | IRF2BP2         | 3,013454777  | 2,747463672  | 0,265991105 |  |
| 226811_at    | FAM46C          | 3,590934306  | 3,325159096  | 0,26577521  |  |
| 240231_at    | -               | 2,596981013  | 2,331254065  | 0,265726949 |  |
| 226239_at    | TMEM150A        | 0,760715727  | 0,495031851  | 0,265683876 |  |
| 214582_at    | PDE3B           | 1,187200746  | 0,921731975  | 0,265468771 |  |
| 235286_at    | -               | 1,187200746  | 0,921731975  | 0,265468771 |  |
| 220721_at    | ZNF614          | 1,305306849  | 1,039887232  | 0,265419618 |  |
| 223361_at    | ABRACL          | 5,053175616  | 4,787816863  | 0,265358754 |  |
| 202261_at    | VPS72           | 3,248232277  | 2,982929462  | 0,265302814 |  |
| 1562271_x_at | ARHGEF7         | -0,59053611  | -0,855751026 | 0,265214916 |  |
| 205809_s_at  | WASL            | -0,59053611  | -0,855751026 | 0,265214916 |  |
| 210923_at    | SLC1A7          | -0,59053611  | -0,855751026 | 0,265214916 |  |
| 216464_x_at  | PTGDR2          | -0,59053611  | -0,855751026 | 0,265214916 |  |
| 219586_at    | WDR59           | -0,59053611  | -0,855751026 | 0,265214916 |  |
| 227506_at    | SLC16A9         | -0,59053611  | -0,855751026 | 0,265214916 |  |
| 230439_at    | LOC389458 /// R | -0,59053611  | -0,855751026 | 0,265214916 |  |
| 237178_at    | LOC100506414    | -0,59053611  | -0,855751026 | 0,265214916 |  |
| 239882_at    | -               | -0,59053611  | -0,855751026 | 0,265214916 |  |
| 244882_at    | TNRC18          | -0,59053611  | -0,855751026 | 0,265214916 |  |
| 1566171_at   | RFFL            | 0,44160593   | 0,176436073  | 0,265169857 |  |
| 223937_at    | FOXP1           | 0,44160593   | 0,176436073  | 0,265169857 |  |
| 201223_s_at  | RAD23B          | 4,807039113  | 4,541934651  | 0,265104462 |  |
| 217859_s_at  | SLC39A9         | 0,95671774   | 0,691645685  | 0,265072055 |  |
| 228618_at    | PEAR1           | 0,95671774   | 0,691645685  | 0,265072055 |  |
| 239010_at    | LOC100653149    | 0,95671774   | 0,691645685  | 0,265072055 |  |
| 208865_at    | CSNK1A1         | 5,055446416  | 4,790501109  | 0,264945307 |  |

|              |                 |              |              |             |  |
|--------------|-----------------|--------------|--------------|-------------|--|
| 201019_s_at  | EIF1AX          | 6,033929877  | 5,769027199  | 0,264902678 |  |
| 1558184_s_at | ZNF17           | -0,196756757 | -0,461594427 | 0,264837669 |  |
| 209359_x_at  | LOC100506403 /  | -0,196756757 | -0,461594427 | 0,264837669 |  |
| 224530_s_at  | KCNIP4          | -0,543019821 | -0,807717948 | 0,264698127 |  |
| 215984_s_at  | ARFRP1          | 1,614289682  | 1,349621332  | 0,26466835  |  |
| 239050_s_at  | -               | 1,614289682  | 1,349621332  | 0,26466835  |  |
| 225166_at    | ARHGAP18        | 1,251994932  | 0,987376598  | 0,264618335 |  |
| 226136_at    | GLIPR1          | 1,251994932  | 0,987376598  | 0,264618335 |  |
| 212177_at    | PNISR           | 1,726031811  | 1,461646549  | 0,264385261 |  |
| 225038_s_at  | SURF6           | 2,406821352  | 2,14244844   | 0,264372913 |  |
| 226886_at    | GFPT1           | 2,747420128  | 2,483094137  | 0,264325991 |  |
| 1569409_x_at | -               | 1,224581536  | 0,960386719  | 0,264194816 |  |
| 216049_at    | RHOBTB3         | 1,224581536  | 0,960386719  | 0,264194816 |  |
| 222517_at    | AP3M1           | 1,789769151  | 1,525647381  | 0,26412177  |  |
| 225955_at    | METRNL          | 1,789769151  | 1,525647381  | 0,26412177  |  |
| 238218_at    | OOEP            | 2,16388051   | 1,899812471  | 0,264068039 |  |
| 227796_at    | ZFP62           | 2,355089531  | 2,091116676  | 0,263972855 |  |
| 1560794_at   | -               | -1,399512875 | -1,663414495 | 0,263901619 |  |
| 1562907_at   | -               | -1,399512875 | -1,663414495 | 0,263901619 |  |
| 1563295_at   | -               | -1,399512875 | -1,663414495 | 0,263901619 |  |
| 1563839_at   | TBC1D7          | -1,399512875 | -1,663414495 | 0,263901619 |  |
| 1568803_at   | -               | -1,399512875 | -1,663414495 | 0,263901619 |  |
| 1568865_at   | FNTB            | -1,399512875 | -1,663414495 | 0,263901619 |  |
| 205336_at    | PVALB           | -1,399512875 | -1,663414495 | 0,263901619 |  |
| 205506_at    | VIL1            | -1,399512875 | -1,663414495 | 0,263901619 |  |
| 208043_at    | -               | -1,399512875 | -1,663414495 | 0,263901619 |  |
| 208480_s_at  | ABCC6           | -1,399512875 | -1,663414495 | 0,263901619 |  |
| 217190_x_at  | ESR1            | -1,399512875 | -1,663414495 | 0,263901619 |  |
| 217429_at    | -               | -1,399512875 | -1,663414495 | 0,263901619 |  |
| 219519_s_at  | SIGLEC1         | -1,399512875 | -1,663414495 | 0,263901619 |  |
| 219971_at    | IL21R           | -1,399512875 | -1,663414495 | 0,263901619 |  |
| 220596_at    | GPATCH4         | -1,399512875 | -1,663414495 | 0,263901619 |  |
| 221296_at    | TECTA           | -1,399512875 | -1,663414495 | 0,263901619 |  |
| 228658_at    | MIAT            | -1,399512875 | -1,663414495 | 0,263901619 |  |
| 232236_at    | -               | -1,399512875 | -1,663414495 | 0,263901619 |  |
| 233785_at    | ADAMTS9         | -1,399512875 | -1,663414495 | 0,263901619 |  |
| 234685_x_at  | KRTAP4-9        | -1,399512875 | -1,663414495 | 0,263901619 |  |
| 234878_at    | ZC3H12B         | -1,399512875 | -1,663414495 | 0,263901619 |  |
| 235627_at    | PFN4            | -1,399512875 | -1,663414495 | 0,263901619 |  |
| 235809_at    | LIN54           | -1,399512875 | -1,663414495 | 0,263901619 |  |
| 237129_at    | CEP152 /// LOC1 | -1,399512875 | -1,663414495 | 0,263901619 |  |
| 239617_at    | GHRLOS          | -1,399512875 | -1,663414495 | 0,263901619 |  |
| 242771_at    | TTN             | -1,399512875 | -1,663414495 | 0,263901619 |  |
| 1552320_a_at | CCDC65          | -2,311268652 | -2,575129729 | 0,263861077 |  |
| 1553036_at   | GPR111          | -2,311268652 | -2,575129729 | 0,263861077 |  |
| 1560309_s_at | -               | -2,311268652 | -2,575129729 | 0,263861077 |  |
| 1561208_at   | -               | -2,311268652 | -2,575129729 | 0,263861077 |  |
| 1562048_at   | LOC152225       | -2,311268652 | -2,575129729 | 0,263861077 |  |
| 1563298_at   | -               | -2,311268652 | -2,575129729 | 0,263861077 |  |
| 1567590_at   | -               | -2,311268652 | -2,575129729 | 0,263861077 |  |
| 1570162_at   | -               | -2,311268652 | -2,575129729 | 0,263861077 |  |
| 1570226_at   | -               | -2,311268652 | -2,575129729 | 0,263861077 |  |
| 204310_s_at  | NPR2            | -2,311268652 | -2,575129729 | 0,263861077 |  |
| 211517_s_at  | IL5RA           | -2,311268652 | -2,575129729 | 0,263861077 |  |
| 211737_x_at  | LOC100287705 /  | -2,311268652 | -2,575129729 | 0,263861077 |  |
| 214319_at    | FRY             | -2,311268652 | -2,575129729 | 0,263861077 |  |

|              |              |              |              |             |  |
|--------------|--------------|--------------|--------------|-------------|--|
| 215703_at    | CFTR         | -2,311268652 | -2,575129729 | 0,263861077 |  |
| 222176_at    | -            | -2,311268652 | -2,575129729 | 0,263861077 |  |
| 230765_at    | KIAA1239     | -2,311268652 | -2,575129729 | 0,263861077 |  |
| 234283_at    | -            | -2,311268652 | -2,575129729 | 0,263861077 |  |
| 238219_at    | C12orf50     | -2,311268652 | -2,575129729 | 0,263861077 |  |
| 239100_x_at  | PCNX         | -2,311268652 | -2,575129729 | 0,263861077 |  |
| 239625_at    | -            | -2,311268652 | -2,575129729 | 0,263861077 |  |
| 240090_at    | -            | -2,311268652 | -2,575129729 | 0,263861077 |  |
| 240412_s_at  | HEATR7B2     | -2,311268652 | -2,575129729 | 0,263861077 |  |
| 240642_at    | ZMYM2        | -2,311268652 | -2,575129729 | 0,263861077 |  |
| 241588_at    | -            | -2,311268652 | -2,575129729 | 0,263861077 |  |
| 242507_at    | -            | -2,311268652 | -2,575129729 | 0,263861077 |  |
| 243607_at    | -            | -2,311268652 | -2,575129729 | 0,263861077 |  |
| 244267_at    | SATB1        | -2,311268652 | -2,575129729 | 0,263861077 |  |
| 202006_at    | PTPN12       | 4,407166241  | 4,143455947  | 0,263710293 |  |
| 216996_s_at  | FASTKD2      | 3,81731168   | 3,553617909  | 0,26369377  |  |
| 210273_at    | PCDH7        | -0,467091869 | -0,730778808 | 0,263686939 |  |
| 211825_s_at  | FLI1         | -0,467091869 | -0,730778808 | 0,263686939 |  |
| 216560_x_at  | IGLC1        | -0,467091869 | -0,730778808 | 0,263686939 |  |
| 216637_at    | -            | -0,467091869 | -0,730778808 | 0,263686939 |  |
| 219527_at    | MARC2        | -0,467091869 | -0,730778808 | 0,263686939 |  |
| 219849_at    | ZNF671       | -0,467091869 | -0,730778808 | 0,263686939 |  |
| 231740_at    | KCNJ11       | -0,467091869 | -0,730778808 | 0,263686939 |  |
| 232779_at    | -            | -0,467091869 | -0,730778808 | 0,263686939 |  |
| 233905_at    | SUN5         | -0,467091869 | -0,730778808 | 0,263686939 |  |
| 237541_at    | -            | -0,467091869 | -0,730778808 | 0,263686939 |  |
| 217216_x_at  | MLH3         | 1,000476627  | 0,73688026   | 0,263596367 |  |
| 1553317_s_at | GPR82        | -2,972500237 | -3,236070201 | 0,263569964 |  |
| 1556220_at   | -            | -2,972500237 | -3,236070201 | 0,263569964 |  |
| 1557636_a_at | C7orf57      | -2,972500237 | -3,236070201 | 0,263569964 |  |
| 1561926_at   | -            | -2,972500237 | -3,236070201 | 0,263569964 |  |
| 1570452_at   | -            | -2,972500237 | -3,236070201 | 0,263569964 |  |
| 208375_at    | IFNA1        | -2,972500237 | -3,236070201 | 0,263569964 |  |
| 222227_at    | -            | -2,972500237 | -3,236070201 | 0,263569964 |  |
| 237987_x_at  | -            | -2,972500237 | -3,236070201 | 0,263569964 |  |
| 240773_at    | -            | -2,972500237 | -3,236070201 | 0,263569964 |  |
| 211299_s_at  | FLOT2        | 0,853119696  | 0,589657387  | 0,263462309 |  |
| 1570071_at   | -            | 0,103263601  | -0,160136748 | 0,26340035  |  |
| 204638_at    | ACP5         | 0,103263601  | -0,160136748 | 0,26340035  |  |
| 222876_s_at  | ADAP2        | 0,103263601  | -0,160136748 | 0,26340035  |  |
| 223692_at    | NMNAT1       | 0,103263601  | -0,160136748 | 0,26340035  |  |
| 226058_at    | B3GNT9       | 0,103263601  | -0,160136748 | 0,26340035  |  |
| 243710_at    | LOC100506175 | 0,103263601  | -0,160136748 | 0,26340035  |  |
| 209058_at    | EDF1         | 4,959281929  | 4,695903811  | 0,263378118 |  |
| 225216_at    | FAM199X      | 2,783874823  | 2,520531219  | 0,263343604 |  |
| 230178_s_at  | ELP2         | 1,168140757  | 0,904843258  | 0,263297499 |  |
| 224330_s_at  | MRPL27       | 4,993521137  | 4,730262306  | 0,263258831 |  |
| 218561_s_at  | LYRM4        | 4,481426562  | 4,21827299   | 0,263153572 |  |
| 223341_s_at  | SCOC         | 3,354274239  | 3,091398163  | 0,262876076 |  |
| 1557167_at   | HCG11        | 0,291166226  | 0,028364014  | 0,262802211 |  |
| 213999_at    | YIPF4        | 0,291166226  | 0,028364014  | 0,262802211 |  |
| 222138_s_at  | WDR13        | 2,960432227  | 2,697670403  | 0,262761824 |  |
| 209943_at    | FBXL4        | 1,578645857  | 1,315948728  | 0,262697128 |  |
| 217870_s_at  | CMPK1        | 4,80549809   | 4,542844647  | 0,262653443 |  |
| 224428_s_at  | CDCA7        | 4,164288643  | 3,901713973  | 0,26257467  |  |
| 224910_at    | CARHSP1      | 0,934330293  | 0,67181667   | 0,262513623 |  |

|              |                 |              |              |             |  |
|--------------|-----------------|--------------|--------------|-------------|--|
| 230546_at    | VASH1           | 0,934330293  | 0,67181667   | 0,262513623 |  |
| 209422_at    | PHF20           | 2,943717636  | 2,681234383  | 0,262483253 |  |
| 218373_at    | AKTIP           | 0,555999837  | 0,293518836  | 0,262481001 |  |
| 226158_at    | KLHL24          | 0,555999837  | 0,293518836  | 0,262481001 |  |
| 243887_at    | MRPL30          | 1,556829052  | 1,294497133  | 0,262331919 |  |
| 213470_s_at  | HNRNPH1         | 3,25727902   | 2,994948944  | 0,262330076 |  |
| 223674_s_at  | CDC42SE1        | 0,779676066  | 0,51742585   | 0,262250215 |  |
| 223430_at    | SIK2            | 0,695652136  | 0,433557298  | 0,262094838 |  |
| 232787_at    | PRIC285         | 0,695652136  | 0,433557298  | 0,262094838 |  |
| 226025_at    | ANKRD28         | 4,738838553  | 4,476764847  | 0,262073706 |  |
| 221268_s_at  | SGPP1           | 2,522021211  | 2,259997914  | 0,262023297 |  |
| 1558412_at   | LOC113230       | -0,85085127  | -1,112851844 | 0,262000574 |  |
| 206396_at    | SLC1A1          | -0,85085127  | -1,112851844 | 0,262000574 |  |
| 215496_at    | SAMD4A          | -0,85085127  | -1,112851844 | 0,262000574 |  |
| 221309_at    | RBM17           | -0,85085127  | -1,112851844 | 0,262000574 |  |
| 234199_at    | -               | -0,85085127  | -1,112851844 | 0,262000574 |  |
| 218013_x_at  | DCTN4           | 1,841816345  | 1,579853228  | 0,261963117 |  |
| 225603_s_at  | TRIQQ           | 1,841816345  | 1,579853228  | 0,261963117 |  |
| 226298_at    | RUNDC1          | 1,352503698  | 1,090553537  | 0,261950161 |  |
| 223061_at    | CHID1           | 2,861566439  | 2,599625088  | 0,261941352 |  |
| 235010_at    | LOC729013       | 0,900083947  | 0,638150376  | 0,261933571 |  |
| 1558987_at   | -               | -2,359436556 | -2,621331989 | 0,261895433 |  |
| 1562638_at   | LOC339874       | -2,359436556 | -2,621331989 | 0,261895433 |  |
| 1562677_at   | -               | -2,359436556 | -2,621331989 | 0,261895433 |  |
| 1564301_a_at | RPAIN           | -2,359436556 | -2,621331989 | 0,261895433 |  |
| 1564642_at   | RUNX1T1         | -2,359436556 | -2,621331989 | 0,261895433 |  |
| 201691_s_at  | TPD52           | -2,359436556 | -2,621331989 | 0,261895433 |  |
| 204646_at    | DPYD            | -2,359436556 | -2,621331989 | 0,261895433 |  |
| 206172_at    | IL13RA2         | -2,359436556 | -2,621331989 | 0,261895433 |  |
| 213831_at    | HLA-DQA1 /// LO | -2,359436556 | -2,621331989 | 0,261895433 |  |
| 214858_at    | PP14571         | -2,359436556 | -2,621331989 | 0,261895433 |  |
| 228067_at    | C2orf55         | -2,359436556 | -2,621331989 | 0,261895433 |  |
| 230206_at    | DOCK5           | -2,359436556 | -2,621331989 | 0,261895433 |  |
| 233249_at    | -               | -2,359436556 | -2,621331989 | 0,261895433 |  |
| 237705_at    | -               | -2,359436556 | -2,621331989 | 0,261895433 |  |
| 240028_at    | FSIP2           | -2,359436556 | -2,621331989 | 0,261895433 |  |
| 240382_at    | LOC100505880    | -2,359436556 | -2,621331989 | 0,261895433 |  |
| 241886_x_at  | LOC338799       | -2,359436556 | -2,621331989 | 0,261895433 |  |
| 243110_x_at  | NPW             | -2,359436556 | -2,621331989 | 0,261895433 |  |
| 203243_s_at  | PDLIM5          | 3,466766854  | 3,204982027  | 0,261784827 |  |
| 201921_at    | GNG10           | 4,318648014  | 4,056921713  | 0,2617263   |  |
| 217598_at    | CINP            | 1,238353345  | 0,976641161  | 0,261712184 |  |
| 230782_at    | SORD            | 1,238353345  | 0,976641161  | 0,261712184 |  |
| 216920_s_at  | TARP /// TRGC2  | 3,787958926  | 3,526272152  | 0,261686774 |  |
| 58900_at     | UBE2D4          | 2,511662711  | 2,250002661  | 0,26166005  |  |
| 1552515_at   | HIPK1           | -1,353583928 | -1,615132408 | 0,26154848  |  |
| 1553852_at   | VPS13B          | -1,353583928 | -1,615132408 | 0,26154848  |  |
| 1557888_at   | ZNF787          | -1,353583928 | -1,615132408 | 0,26154848  |  |
| 1559559_at   | FAM75E1         | -1,353583928 | -1,615132408 | 0,26154848  |  |
| 1559939_at   | -               | -1,353583928 | -1,615132408 | 0,26154848  |  |
| 1561311_at   | -               | -1,353583928 | -1,615132408 | 0,26154848  |  |
| 207106_s_at  | LTK             | -1,353583928 | -1,615132408 | 0,26154848  |  |
| 211786_at    | TNFRSF9         | -1,353583928 | -1,615132408 | 0,26154848  |  |
| 213680_at    | KRT6B           | -1,353583928 | -1,615132408 | 0,26154848  |  |
| 221167_s_at  | CCDC70          | -1,353583928 | -1,615132408 | 0,26154848  |  |
| 225142_at    | JHDM1D          | -1,353583928 | -1,615132408 | 0,26154848  |  |

|              |                 |              |              |             |  |
|--------------|-----------------|--------------|--------------|-------------|--|
| 225496_s_at  | SYTL2           | -1,353583928 | -1,615132408 | 0,26154848  |  |
| 229896_at    | -               | -1,353583928 | -1,615132408 | 0,26154848  |  |
| 230125_at    | GUSB            | -1,353583928 | -1,615132408 | 0,26154848  |  |
| 230441_at    | PLEKHG4B        | -1,353583928 | -1,615132408 | 0,26154848  |  |
| 232806_s_at  | FAM131A         | -1,353583928 | -1,615132408 | 0,26154848  |  |
| 232984_at    | HYDIN           | -1,353583928 | -1,615132408 | 0,26154848  |  |
| 237567_at    | STAB2           | -1,353583928 | -1,615132408 | 0,26154848  |  |
| 238036_at    | SHE             | -1,353583928 | -1,615132408 | 0,26154848  |  |
| 239803_at    | -               | -1,353583928 | -1,615132408 | 0,26154848  |  |
| 244471_x_at  | PANX2           | -1,353583928 | -1,615132408 | 0,26154848  |  |
| 244692_at    | CYP4F22         | -1,353583928 | -1,615132408 | 0,26154848  |  |
| 225366_at    | PGM2            | 2,097427503  | 1,835911187  | 0,261516316 |  |
| 37226_at     | BNIP1           | 1,39615908   | 1,134680029  | 0,261479051 |  |
| 204382_at    | NAT9            | 1,462198073  | 1,200746069  | 0,261452004 |  |
| 1552726_at   | ADAMTS17        | -0,352951799 | -0,614371577 | 0,261419778 |  |
| 214975_s_at  | MTMR1           | -0,352951799 | -0,614371577 | 0,261419778 |  |
| 228838_at    | -               | -0,352951799 | -0,614371577 | 0,261419778 |  |
| 232802_at    | SYT8            | -0,352951799 | -0,614371577 | 0,261419778 |  |
| 212301_at    | RTF1            | 4,400036207  | 4,138648509  | 0,261387698 |  |
| 220536_at    | VRTN            | -0,022466681 | -0,283667828 | 0,261201147 |  |
| 231278_at    | -               | -0,022466681 | -0,283667828 | 0,261201147 |  |
| 225171_at    | ARHGAP18        | 4,246090231  | 3,985091175  | 0,260999056 |  |
| 203351_s_at  | ORC4            | 4,079482587  | 3,818491075  | 0,260991512 |  |
| 230786_at    | ZCCHC8          | 0,46522187   | 0,204310755  | 0,260911115 |  |
| 236937_at    | LOC100505729 /  | 0,46522187   | 0,204310755  | 0,260911115 |  |
| 239284_at    | -               | 0,181384709  | -0,079522948 | 0,260907657 |  |
| 241779_at    | MTX3            | 0,181384709  | -0,079522948 | 0,260907657 |  |
| 210357_s_at  | SMOX            | 3,101484927  | 2,840694075  | 0,260790852 |  |
| 201008_s_at  | TXNIP           | 4,407166241  | 4,146452482  | 0,260713759 |  |
| 207187_at    | JAK3            | 0,613492853  | 0,352836757  | 0,260656096 |  |
| 219057_at    | RABEP2          | 0,613492853  | 0,352836757  | 0,260656096 |  |
| 212630_at    | EXOC3           | 2,331726354  | 2,071071048  | 0,260655306 |  |
| 1568900_a_at | ZNF568          | 1,274448124  | 1,013870809  | 0,260577315 |  |
| 204573_at    | CROT            | 1,748661581  | 1,488344553  | 0,260317029 |  |
| 216606_x_at  | LYPLA2          | 2,44295215   | 2,182705233  | 0,260246916 |  |
| 210156_s_at  | PCMT1           | 5,494689936  | 5,234479961  | 0,260209975 |  |
| 1555504_at   | TYR             | -3,013665402 | -3,273861381 | 0,260195979 |  |
| 215938_s_at  | PLA2G6          | 1,390002893  | 1,129843209  | 0,260159685 |  |
| 219822_at    | MTRF1           | 1,390002893  | 1,129843209  | 0,260159685 |  |
| 229219_s_at  | -               | 0,984222186  | 0,724100169  | 0,260122016 |  |
| 214455_at    | HIST1H2BC /// H | 3,170152481  | 2,910041809  | 0,260110672 |  |
| 200971_s_at  | SERP1           | 5,862786464  | 5,60270124   | 0,260085224 |  |
| 1554086_at   | TUBGCP3         | 0,417596971  | 0,157549243  | 0,260047728 |  |
| 1569144_a_at | C9orf169        | 0,417596971  | 0,157549243  | 0,260047728 |  |
| 207917_at    | -               | 0,417596971  | 0,157549243  | 0,260047728 |  |
| 230642_at    | -               | 0,417596971  | 0,157549243  | 0,260047728 |  |
| 233517_s_at  | HIF3A           | 0,417596971  | 0,157549243  | 0,260047728 |  |
| 236178_at    | C6orf162        | 0,417596971  | 0,157549243  | 0,260047728 |  |
| 232038_at    | C6orf170        | 0,57058931   | 0,310717132  | 0,259872178 |  |
| 1562601_at   | UNQ6975         | 0,123193849  | -0,136643983 | 0,259837832 |  |
| 203851_at    | IGFBP6          | 0,123193849  | -0,136643983 | 0,259837832 |  |
| 207692_s_at  | ACAN            | 0,123193849  | -0,136643983 | 0,259837832 |  |
| 220077_at    | CCDC134         | 0,123193849  | -0,136643983 | 0,259837832 |  |
| 213943_at    | TWIST1          | 2,05655332   | 1,796776588  | 0,259776733 |  |
| 217936_at    | ARHGAP5         | 3,03990821   | 2,780243895  | 0,259664315 |  |
| 203447_at    | PSMD5           | 4,040056475  | 3,780418488  | 0,259637987 |  |

|              |                   |              |              |             |  |
|--------------|-------------------|--------------|--------------|-------------|--|
| 214626_s_at  | GANAB             | 3,653945107  | 3,394350331  | 0,259594777 |  |
| 238021_s_at  | CRNDE             | 4,070528765  | 3,810956512  | 0,259572253 |  |
| 233842_x_at  | C20orf43          | 4,396969658  | 4,137444143  | 0,259525516 |  |
| 211969_at    | HSP90AA1          | 7,637820532  | 7,378342424  | 0,259478108 |  |
| 218573_at    | MAGEH1            | 3,173740462  | 2,914267328  | 0,259473134 |  |
| 217826_s_at  | UBE2J1            | 3,266269388  | 3,006869115  | 0,259400273 |  |
| 213710_s_at  | LOC100652987      | 1,951783949  | 1,692388143  | 0,259395806 |  |
| 205115_s_at  | RBM19             | 1,339784194  | 1,080561626  | 0,259222569 |  |
| 218816_at    | LRRC1             | 1,094335495  | 0,835239052  | 0,259096443 |  |
| 241933_at    | QRSL1             | 1,094335495  | 0,835239052  | 0,259096443 |  |
| 241912_at    | ZNF814            | 1,575032557  | 1,315948728  | 0,259083828 |  |
| 51774_s_at   | UBE2D4            | 2,545290278  | 2,286318242  | 0,258972036 |  |
| 202634_at    | POLR2K            | 4,341690695  | 4,082805739  | 0,258884956 |  |
| 226395_at    | HOOK3             | 2,658027143  | 2,39915583   | 0,258871314 |  |
| 223069_s_at  | EML4              | 0,917308734  | 0,658444279  | 0,258864455 |  |
| 224437_s_at  | VTA1              | 4,876570556  | 4,617737065  | 0,258833492 |  |
| 209333_at    | ULK1              | 1,027166904  | 0,768343791  | 0,258823114 |  |
| 201449_at    | TIA1              | 2,2992452    | 2,040470494  | 0,258774706 |  |
| 211926_s_at  | MYH9              | 3,121439986  | 2,862725455  | 0,258714531 |  |
| 201435_s_at  | EIF4E             | 4,998924782  | 4,74021396   | 0,258710822 |  |
| 202452_at    | ZER1              | 1,063722698  | 0,805216064  | 0,258506634 |  |
| 213615_at    | LPCAT3            | 1,163336153  | 0,904843258  | 0,258492895 |  |
| 221655_x_at  | EPS8L1            | 1,163336153  | 0,904843258  | 0,258492895 |  |
| 218647_s_at  | YRDC              | 3,764356332  | 3,505883949  | 0,258472383 |  |
| 219403_s_at  | HPSE              | 1,504602299  | 1,246149888  | 0,258452411 |  |
| 205048_s_at  | PSPH              | 1,649074067  | 1,390636111  | 0,258437955 |  |
| 243278_at    | FOXP2             | 1,649074067  | 1,390636111  | 0,258437955 |  |
| 212568_s_at  | DLAT              | 4,073092675  | 3,814728712  | 0,258363963 |  |
| 210293_s_at  | SEC23B            | 4,396969658  | 4,138648509  | 0,258321149 |  |
| 32128_at     | CCL18             | -1,987984448 | -2,246296361 | 0,258311912 |  |
| 1555028_at   | BRD3              | -2,43257096  | -2,690860744 | 0,258289784 |  |
| 1555127_at   | MOCS1             | -2,43257096  | -2,690860744 | 0,258289784 |  |
| 1555246_a_at | SCN1A             | -2,43257096  | -2,690860744 | 0,258289784 |  |
| 1561452_at   | -                 | -2,43257096  | -2,690860744 | 0,258289784 |  |
| 1563010_at   | ITGB8             | -2,43257096  | -2,690860744 | 0,258289784 |  |
| 1564130_x_at | -                 | -2,43257096  | -2,690860744 | 0,258289784 |  |
| 1565282_at   | -                 | -2,43257096  | -2,690860744 | 0,258289784 |  |
| 208054_at    | HERC4             | -2,43257096  | -2,690860744 | 0,258289784 |  |
| 211751_at    | LOC653513 /// LOC | -2,43257096  | -2,690860744 | 0,258289784 |  |
| 215132_at    | -                 | -2,43257096  | -2,690860744 | 0,258289784 |  |
| 216498_at    | -                 | -2,43257096  | -2,690860744 | 0,258289784 |  |
| 231421_at    | LOC254312         | -2,43257096  | -2,690860744 | 0,258289784 |  |
| 232742_at    | -                 | -2,43257096  | -2,690860744 | 0,258289784 |  |
| 234117_at    | NPSR1-AS1         | -2,43257096  | -2,690860744 | 0,258289784 |  |
| 234636_at    | -                 | -2,43257096  | -2,690860744 | 0,258289784 |  |
| 234945_at    | FAM54A            | -2,43257096  | -2,690860744 | 0,258289784 |  |
| 235777_at    | ANKRD44           | -2,43257096  | -2,690860744 | 0,258289784 |  |
| 238274_at    | -                 | -2,43257096  | -2,690860744 | 0,258289784 |  |
| 238871_at    | MLLT4             | -2,43257096  | -2,690860744 | 0,258289784 |  |
| 240251_at    | IFT80             | -2,43257096  | -2,690860744 | 0,258289784 |  |
| 241435_at    | -                 | -2,43257096  | -2,690860744 | 0,258289784 |  |
| 243179_at    | -                 | -2,43257096  | -2,690860744 | 0,258289784 |  |
| 243683_at    | MORF4L2           | -2,43257096  | -2,690860744 | 0,258289784 |  |
| 200799_at    | HSPA1A /// HSPA   | 6,507687228  | 6,249430555  | 0,258256673 |  |
| 235232_at    | GMEB1             | 1,530951994  | 1,272721751  | 0,258230243 |  |
| 228222_at    | PPP1CB            | 4,370116264  | 4,111917374  | 0,25819889  |  |



|              |              |              |              |             |  |
|--------------|--------------|--------------|--------------|-------------|--|
| 1554814_at   | UBE2O        | 0,995078803  | 0,73688026   | 0,258198542 |  |
| 232317_at    | PLXNA4       | 0,995078803  | 0,73688026   | 0,258198542 |  |
| 202321_at    | GGPS1        | 0,882651021  | 0,624460759  | 0,258190262 |  |
| 222507_s_at  | TMEM9B       | 2,604089881  | 2,345926937  | 0,258162944 |  |
| 227877_at    | ANXA2R       | 0,317354302  | 0,059218869  | 0,258135433 |  |
| 1552694_at   | SLC2A13      | -2,779459409 | -3,037500868 | 0,25804146  |  |
| 1554235_at   | CTNNA3       | -2,779459409 | -3,037500868 | 0,25804146  |  |
| 1554901_at   | GAFA1        | -2,779459409 | -3,037500868 | 0,25804146  |  |
| 1560647_at   | TSPYL1       | -2,779459409 | -3,037500868 | 0,25804146  |  |
| 1560859_at   | -            | -2,779459409 | -3,037500868 | 0,25804146  |  |
| 1561529_at   | -            | -2,779459409 | -3,037500868 | 0,25804146  |  |
| 1569770_x_at | -            | -2,779459409 | -3,037500868 | 0,25804146  |  |
| 1569840_at   | -            | -2,779459409 | -3,037500868 | 0,25804146  |  |
| 207647_at    | CDY1         | -2,779459409 | -3,037500868 | 0,25804146  |  |
| 211568_at    | BAI3         | -2,779459409 | -3,037500868 | 0,25804146  |  |
| 233591_at    | -            | -2,779459409 | -3,037500868 | 0,25804146  |  |
| 234702_x_at  | CFTR         | -2,779459409 | -3,037500868 | 0,25804146  |  |
| 239902_at    | -            | -2,779459409 | -3,037500868 | 0,25804146  |  |
| 241220_at    | -            | -2,779459409 | -3,037500868 | 0,25804146  |  |
| 232367_x_at  | ZNF598       | 1,40228911   | 1,144305291  | 0,257983819 |  |
| 40255_at     | DDX28        | 1,960118853  | 1,702196344  | 0,257922509 |  |
| 202302_s_at  | RSRC2        | 4,911014665  | 4,653142152  | 0,257872513 |  |
| 1553696_s_at | ZNF569       | 3,62365843   | 3,365837114  | 0,257821316 |  |
| 202137_s_at  | ZMYND11      | 1,348276312  | 1,090553537  | 0,257722774 |  |
| 214323_s_at  | UPF3A        | 3,895444023  | 3,637795954  | 0,25764807  |  |
| 226338_at    | TMEM55A      | 0,962260738  | 0,704715219  | 0,257545519 |  |
| 230267_at    | -            | 0,962260738  | 0,704715219  | 0,257545519 |  |
| 204128_s_at  | RFC3         | 3,861734212  | 3,604188755  | 0,257545458 |  |
| 208829_at    | TAPBP        | 2,571820446  | 2,314300277  | 0,257520169 |  |
| 213301_x_at  | TRIM24       | 4,87436728   | 4,616873117  | 0,257494164 |  |
| 226603_at    | SAMD9L       | 1,699726954  | 1,442269454  | 0,2574575   |  |
| 202052_s_at  | RAI14        | -0,00073712  | -0,258114234 | 0,257377114 |  |
| 203796_s_at  | BCL7A        | -0,00073712  | -0,258114234 | 0,257377114 |  |
| 219295_s_at  | PCOLCE2      | -0,00073712  | -0,258114234 | 0,257377114 |  |
| 228290_at    | PLK1S1       | -0,00073712  | -0,258114234 | 0,257377114 |  |
| 232095_at    | LOC100509683 | -0,00073712  | -0,258114234 | 0,257377114 |  |
| 205309_at    | SMPDL3B      | -1,2845686   | -1,541908042 | 0,257339442 |  |
| 212466_at    | SPRED2       | -1,2845686   | -1,541908042 | 0,257339442 |  |
| 214929_s_at  | KIAA1109     | -1,2845686   | -1,541908042 | 0,257339442 |  |
| 221584_s_at  | KCNMA1       | -1,2845686   | -1,541908042 | 0,257339442 |  |
| 224515_at    | -            | -1,2845686   | -1,541908042 | 0,257339442 |  |
| 225809_at    | PARM1        | -1,2845686   | -1,541908042 | 0,257339442 |  |
| 226436_at    | RASSF4       | -1,2845686   | -1,541908042 | 0,257339442 |  |
| 229157_at    | PRKAG2-AS1   | -1,2845686   | -1,541908042 | 0,257339442 |  |
| 231123_at    | TRIM36       | -1,2845686   | -1,541908042 | 0,257339442 |  |
| 233644_at    | KATNAL2      | -1,2845686   | -1,541908042 | 0,257339442 |  |
| 234079_at    | -            | -1,2845686   | -1,541908042 | 0,257339442 |  |
| 235937_at    | OCLN         | -1,2845686   | -1,541908042 | 0,257339442 |  |
| 240071_at    | -            | -1,2845686   | -1,541908042 | 0,257339442 |  |
| 240697_at    | -            | -1,2845686   | -1,541908042 | 0,257339442 |  |
| 240764_at    | -            | -1,2845686   | -1,541908042 | 0,257339442 |  |
| 244548_at    | -            | -1,2845686   | -1,541908042 | 0,257339442 |  |
| 244601_at    | -            | -1,2845686   | -1,541908042 | 0,257339442 |  |
| 219343_at    | CDC37L1      | 1,104397092  | 0,847075464  | 0,257321628 |  |
| 239562_at    | MTHFD2L      | 1,233777334  | 0,976641161  | 0,257136173 |  |
| 228736_at    | HELQ         | 1,434549838  | 1,177496821  | 0,257053017 |  |

|              |                 |              |              |             |  |
|--------------|-----------------|--------------|--------------|-------------|--|
| 201260_s_at  | SYPL1           | 4,467851686  | 4,210848982  | 0,257002704 |  |
| 203560_at    | GGH             | 4,713590151  | 4,456625687  | 0,256964464 |  |
| 218355_at    | KIF4A           | 3,966117062  | 3,709248632  | 0,25686843  |  |
| 217426_at    | -               | 0,928678725  | 0,67181667   | 0,256862055 |  |
| 1553868_a_at | KIAA0825        | -3,054236653 | -3,311072652 | 0,256835999 |  |
| 1558957_s_at | -               | -3,054236653 | -3,311072652 | 0,256835999 |  |
| 1560540_x_at | -               | -3,054236653 | -3,311072652 | 0,256835999 |  |
| 220649_at    | AGBL3           | -3,054236653 | -3,311072652 | 0,256835999 |  |
| 240952_at    | -               | -3,054236653 | -3,311072652 | 0,256835999 |  |
| 244632_at    | CNTN5           | -3,054236653 | -3,311072652 | 0,256835999 |  |
| 213092_x_at  | DNAJC9          | 4,077568583  | 3,820743792  | 0,256824791 |  |
| 212779_at    | KIAA1109        | 2,281618189  | 2,024923328  | 0,256694862 |  |
| 1562055_at   | -               | -0,234278768 | -0,490927335 | 0,256648568 |  |
| 206060_s_at  | PTPN22          | -0,234278768 | -0,490927335 | 0,256648568 |  |
| 215637_at    | CEP41           | -0,234278768 | -0,490927335 | 0,256648568 |  |
| 219504_s_at  | RPAP2           | -0,234278768 | -0,490927335 | 0,256648568 |  |
| 232140_at    | -               | -0,234278768 | -0,490927335 | 0,256648568 |  |
| 241989_at    | GRK4            | -0,234278768 | -0,490927335 | 0,256648568 |  |
| 225694_at    | CDK12           | 3,21379258   | 2,957221307  | 0,256571273 |  |
| 1570156_s_at | FMN1 /// LOC100 | -0,423248115 | -0,679763839 | 0,256515724 |  |
| 215687_x_at  | PLCB1           | -0,423248115 | -0,679763839 | 0,256515724 |  |
| 226138_s_at  | -               | -0,423248115 | -0,679763839 | 0,256515724 |  |
| 231822_at    | CTTNBP2NL       | -0,423248115 | -0,679763839 | 0,256515724 |  |
| 224940_s_at  | PAPPA           | 2,26825514   | 2,011838132  | 0,256417008 |  |
| 1562799_at   | LOC100130285    | -0,655928373 | -0,912331589 | 0,256403216 |  |
| 210801_at    | DIMT1           | -0,655928373 | -0,912331589 | 0,256403216 |  |
| 210885_s_at  | TRIM15          | -0,655928373 | -0,912331589 | 0,256403216 |  |
| 213217_at    | ADCY2           | -0,655928373 | -0,912331589 | 0,256403216 |  |
| 230966_at    | IL4I1           | -0,655928373 | -0,912331589 | 0,256403216 |  |
| 239051_at    | FLJ31813        | -0,655928373 | -0,912331589 | 0,256403216 |  |
| 239177_at    | IRGQ            | -0,655928373 | -0,912331589 | 0,256403216 |  |
| 240669_at    | -               | -0,655928373 | -0,912331589 | 0,256403216 |  |
| 228840_at    | AMOTL1          | 1,614289682  | 1,3579181    | 0,256371582 |  |
| 203481_at    | FAM178A         | 3,159334685  | 2,902971658  | 0,256363027 |  |
| 212997_s_at  | TLK2            | 2,739371812  | 2,483094137  | 0,256277676 |  |
| 226232_at    | GDF11           | 0,384950573  | 0,128747141  | 0,256203433 |  |
| 239166_at    | -               | 0,384950573  | 0,128747141  | 0,256203433 |  |
| 1555833_a_at | IRGQ            | 2,14450783   | 1,888402606  | 0,256105225 |  |
| 204147_s_at  | TFDP1           | 2,68509622   | 2,428994491  | 0,25610173  |  |
| 1552678_a_at | USP28           | 0,592200562  | 0,336136178  | 0,256064384 |  |
| 218176_at    | MAGEF1          | 2,371846398  | 2,115788273  | 0,256058125 |  |
| 222681_at    | POGLUT1         | 2,814842651  | 2,558821855  | 0,256020796 |  |
| 1557312_at   | C12orf61        | -2,479842156 | -2,735862426 | 0,256020269 |  |
| 1557581_x_at | -               | -2,479842156 | -2,735862426 | 0,256020269 |  |
| 1558301_a_at | EFCAB5          | -2,479842156 | -2,735862426 | 0,256020269 |  |
| 1569486_at   | -               | -2,479842156 | -2,735862426 | 0,256020269 |  |
| 1569709_at   | SZT2            | -2,479842156 | -2,735862426 | 0,256020269 |  |
| 1569923_s_at | LINC00491       | -2,479842156 | -2,735862426 | 0,256020269 |  |
| 205974_at    | HOXD1           | -2,479842156 | -2,735862426 | 0,256020269 |  |
| 206884_s_at  | SCEL            | -2,479842156 | -2,735862426 | 0,256020269 |  |
| 210274_at    | MAGEA8          | -2,479842156 | -2,735862426 | 0,256020269 |  |
| 213808_at    | ADAM23          | -2,479842156 | -2,735862426 | 0,256020269 |  |
| 214983_at    | TTY15           | -2,479842156 | -2,735862426 | 0,256020269 |  |
| 225016_at    | APCDD1          | -2,479842156 | -2,735862426 | 0,256020269 |  |
| 228221_at    | SLC44A3         | -2,479842156 | -2,735862426 | 0,256020269 |  |
| 230248_x_at  | -               | -2,479842156 | -2,735862426 | 0,256020269 |  |

|              |                  |              |              |             |  |
|--------------|------------------|--------------|--------------|-------------|--|
| 234815_at    | -                | -2,479842156 | -2,735862426 | 0,256020269 |  |
| 234823_at    | -                | -2,479842156 | -2,735862426 | 0,256020269 |  |
| 236811_at    | DMRTC2           | -2,479842156 | -2,735862426 | 0,256020269 |  |
| 237298_at    | FLJ26850         | -2,479842156 | -2,735862426 | 0,256020269 |  |
| 238513_at    | PRRG4            | -2,479842156 | -2,735862426 | 0,256020269 |  |
| 240488_at    | -                | -2,479842156 | -2,735862426 | 0,256020269 |  |
| 241562_x_at  | -                | -2,479842156 | -2,735862426 | 0,256020269 |  |
| 218423_x_at  | VPS54            | 2,923969333  | 2,667949403  | 0,25601993  |  |
| 201075_s_at  | SMARCC1          | 3,480351894  | 3,22439681   | 0,255955083 |  |
| 1554279_a_at | TRMT2B           | 0,209623097  | -0,046302147 | 0,255925244 |  |
| 218184_at    | TULP4            | 2,178241192  | 1,922365006  | 0,255876185 |  |
| 219515_at    | PRDM10           | 1,990274687  | 1,73441697   | 0,255857717 |  |
| 204805_s_at  | H1FX             | 2,061726373  | 1,805902329  | 0,255824044 |  |
| 219904_at    | ZSCAN5A          | 2,618203384  | 2,362515214  | 0,25568817  |  |
| 208527_x_at  | HIST1H2BC /// H  | 6,41042397   | 6,154836421  | 0,255587548 |  |
| 202293_at    | STAG1            | 2,227406889  | 1,971855016  | 0,255551873 |  |
| 216381_x_at  | AKR7A3           | 0,859074518  | 0,603679647  | 0,255394872 |  |
| 210625_s_at  | AKAP1            | 1,011212064  | 0,755840599  | 0,255371464 |  |
| 234956_at    | LOC93444         | 1,011212064  | 0,755840599  | 0,255371464 |  |
| 212887_at    | SEC23A           | 4,077568583  | 3,822243651  | 0,255324932 |  |
| 1555845_at   | -                | 2,632180155  | 2,376875125  | 0,25530503  |  |
| 205339_at    | STIL             | 3,672662071  | 3,417357537  | 0,255304535 |  |
| 202666_s_at  | ACTL6A           | 4,519522578  | 4,264240901  | 0,255281678 |  |
| 226859_at    | DNAJC25 /// DNA  | 2,213529682  | 1,958277216  | 0,255252466 |  |
| 228254_at    | STAM2            | 1,799091453  | 1,543943227  | 0,255148226 |  |
| 235918_x_at  | CEP97            | 1,799091453  | 1,543943227  | 0,255148226 |  |
| 223977_s_at  | LINC00470        | 0,735041319  | 0,479907041  | 0,255134278 |  |
| 213763_at    | HIPK2            | 0,334552598  | 0,079428135  | 0,255124463 |  |
| 220332_at    | CLDN16           | 0,334552598  | 0,079428135  | 0,255124463 |  |
| 237211_x_at  | MORN3            | 0,334552598  | 0,079428135  | 0,255124463 |  |
| 242427_at    | WAC              | 0,334552598  | 0,079428135  | 0,255124463 |  |
| 1552768_at   | CAMKK1           | -0,79540287  | -1,050406615 | 0,255003745 |  |
| 1562324_a_at | -                | -0,79540287  | -1,050406615 | 0,255003745 |  |
| 201539_s_at  | FHL1             | -0,79540287  | -1,050406615 | 0,255003745 |  |
| 219786_at    | MTL5             | -0,79540287  | -1,050406615 | 0,255003745 |  |
| 220489_s_at  | SERINC2          | -0,79540287  | -1,050406615 | 0,255003745 |  |
| 220675_s_at  | PNPLA3           | -0,79540287  | -1,050406615 | 0,255003745 |  |
| 220716_at    | GNL3LP1          | -0,79540287  | -1,050406615 | 0,255003745 |  |
| 227155_at    | LMO4             | -0,79540287  | -1,050406615 | 0,255003745 |  |
| 228447_at    | AKAP17A          | -0,79540287  | -1,050406615 | 0,255003745 |  |
| 204193_at    | CHKB             | 1,549482847  | 1,294497133  | 0,254985714 |  |
| 224173_s_at  | C2orf15 /// MRPL | 1,549482847  | 1,294497133  | 0,254985714 |  |
| 211754_s_at  | SLC25A17         | 3,231115193  | 2,976208448  | 0,254906745 |  |
| 201424_s_at  | CUL4A            | 3,831767101  | 3,576905405  | 0,254861696 |  |
| 219283_at    | C1GALT1C1        | 2,014487247  | 1,759685182  | 0,254802065 |  |
| 235451_at    | SMAD5            | 1,119359127  | 0,864649967  | 0,25470916  |  |
| 1554637_a_at | CBFA2T2          | 0,152582607  | -0,102100538 | 0,254683145 |  |
| 1564697_a_at | LOC400752        | 0,152582607  | -0,102100538 | 0,254683145 |  |
| 206027_at    | S100A3           | 0,152582607  | -0,102100538 | 0,254683145 |  |
| 220514_at    | LOC100505870     | 0,152582607  | -0,102100538 | 0,254683145 |  |
| 231784_s_at  | DCAF13           | 4,434840843  | 4,180180181  | 0,254660663 |  |
| 202733_at    | P4HA2            | 2,11992033   | 1,865308541  | 0,254611788 |  |
| 1559038_at   | 37500            | 0,822971223  | 0,568365095  | 0,254606128 |  |
| 239004_at    | SQSTM1           | 0,822971223  | 0,568365095  | 0,254606128 |  |
| 228953_at    | WHAMM            | 1,62481334   | 1,370274469  | 0,254538871 |  |
| 201471_s_at  | SQSTM1           | 3,50144467   | 3,246908183  | 0,254536487 |  |

|              |                 |              |              |             |  |
|--------------|-----------------|--------------|--------------|-------------|--|
| 218078_s_at  | ZDHHC3          | 2,338135744  | 2,083632167  | 0,254503577 |  |
| 1569647_at   | LOC643623       | -1,240169874 | -1,494668682 | 0,254498807 |  |
| 207426_s_at  | TNFSF4          | -1,240169874 | -1,494668682 | 0,254498807 |  |
| 213774_s_at  | PPP1R2          | -1,240169874 | -1,494668682 | 0,254498807 |  |
| 217063_x_at  | YME1L1          | -1,240169874 | -1,494668682 | 0,254498807 |  |
| 217169_at    | IGHA1 /// IGHG1 | -1,240169874 | -1,494668682 | 0,254498807 |  |
| 220055_at    | ZNF287          | -1,240169874 | -1,494668682 | 0,254498807 |  |
| 220593_s_at  | CCDC40          | -1,240169874 | -1,494668682 | 0,254498807 |  |
| 223654_s_at  | CELF4           | -1,240169874 | -1,494668682 | 0,254498807 |  |
| 229900_at    | CD109           | -1,240169874 | -1,494668682 | 0,254498807 |  |
| 230643_at    | WNT9A           | -1,240169874 | -1,494668682 | 0,254498807 |  |
| 236433_at    | LOC100506713 /  | -1,240169874 | -1,494668682 | 0,254498807 |  |
| 237203_at    | LOC100506546    | -1,240169874 | -1,494668682 | 0,254498807 |  |
| 242975_s_at  | -               | -1,240169874 | -1,494668682 | 0,254498807 |  |
| 244465_at    | -               | -1,240169874 | -1,494668682 | 0,254498807 |  |
| 222679_s_at  | DCUN1D1         | 2,874852734  | 2,620464265  | 0,254388469 |  |
| 222652_s_at  | GLYR1           | 1,187200746  | 0,932882274  | 0,254318472 |  |
| 238054_at    | ADPRHL1         | 1,187200746  | 0,932882274  | 0,254318472 |  |
| 1553507_a_at | GPR6            | -0,136301282 | -0,39061235  | 0,254311068 |  |
| 202426_s_at  | RXRA            | -0,136301282 | -0,39061235  | 0,254311068 |  |
| 203618_at    | FAIM2           | -0,136301282 | -0,39061235  | 0,254311068 |  |
| 204929_s_at  | VAMP5           | -0,136301282 | -0,39061235  | 0,254311068 |  |
| 206447_at    | CELA2A /// CELA | -0,136301282 | -0,39061235  | 0,254311068 |  |
| 222923_s_at  | KCNE3           | -0,136301282 | -0,39061235  | 0,254311068 |  |
| 229358_at    | IHH             | -0,136301282 | -0,39061235  | 0,254311068 |  |
| 230633_at    | TMEM102         | -0,136301282 | -0,39061235  | 0,254311068 |  |
| 234351_x_at  | TRPS1           | -0,136301282 | -0,39061235  | 0,254311068 |  |
| 238451_at    | MPP7            | -0,136301282 | -0,39061235  | 0,254311068 |  |
| 238745_at    | -               | -0,136301282 | -0,39061235  | 0,254311068 |  |
| 242337_at    | -               | 1,672933557  | 1,418668082  | 0,254265474 |  |
| 214804_at    | CENPI           | 0,503742507  | 0,249604176  | 0,254138331 |  |
| 230598_at    | -               | 0,503742507  | 0,249604176  | 0,254138331 |  |
| 211945_s_at  | ITGB1           | 6,497105595  | 6,243145676  | 0,253959919 |  |
| 226705_at    | FGFR1           | 0,945567441  | 0,691645685  | 0,253921756 |  |
| 242539_at    | DIS3L2          | 0,945567441  | 0,691645685  | 0,253921756 |  |
| 208706_s_at  | EIF5            | 5,316276373  | 5,062398002  | 0,253878371 |  |
| 213619_at    | HNRNPH1         | 6,244908051  | 5,991050893  | 0,253857158 |  |
| 225917_at    | -               | 1,946200473  | 1,692388143  | 0,25381233  |  |
| 1561687_a_at | ZNF382          | 1,556829052  | 1,303116084  | 0,253712967 |  |
| 219180_s_at  | PEX26           | 1,454352496  | 1,200746069  | 0,253606427 |  |
| 1557051_s_at | HOTAIRM1        | 0,606430281  | 0,352836757  | 0,253593524 |  |
| 214162_at    | LOC284244       | 0,606430281  | 0,352836757  | 0,253593524 |  |
| 220470_at    | BET1L           | 0,606430281  | 0,352836757  | 0,253593524 |  |
| 221970_s_at  | NOL11           | 5,037507384  | 4,783973541  | 0,253533843 |  |
| 222736_s_at  | TMEM38B         | 3,292909151  | 3,039473081  | 0,25343607  |  |
| 236196_at    | -               | 1,631786706  | 1,378453643  | 0,253333063 |  |
| 1554830_a_at | STEAP3          | -0,512251684 | -0,765504029 | 0,253252344 |  |
| 1559449_a_at | -               | -0,512251684 | -0,765504029 | 0,253252344 |  |
| 1569838_at   | -               | -0,512251684 | -0,765504029 | 0,253252344 |  |
| 206822_s_at  | L3MBTL1         | -0,512251684 | -0,765504029 | 0,253252344 |  |
| 207172_s_at  | CDH11           | -0,512251684 | -0,765504029 | 0,253252344 |  |
| 209447_at    | SYNE1           | -0,512251684 | -0,765504029 | 0,253252344 |  |
| 211280_s_at  | NRF1            | -0,512251684 | -0,765504029 | 0,253252344 |  |
| 218864_at    | TNS1            | -0,512251684 | -0,765504029 | 0,253252344 |  |
| 225495_x_at  | GADD45GIP1      | -0,512251684 | -0,765504029 | 0,253252344 |  |
| 225822_at    | TMEM125         | -0,512251684 | -0,765504029 | 0,253252344 |  |

|              |                  |              |              |             |  |
|--------------|------------------|--------------|--------------|-------------|--|
| 232969_at    | CARD8            | -0,512251684 | -0,765504029 | 0,253252344 |  |
| 234328_at    | -                | -0,512251684 | -0,765504029 | 0,253252344 |  |
| 235141_at    | MARVELD2         | -0,512251684 | -0,765504029 | 0,253252344 |  |
| 236061_at    | PRDM15           | -0,512251684 | -0,765504029 | 0,253252344 |  |
| 238074_at    | WDR27            | -0,512251684 | -0,765504029 | 0,253252344 |  |
| 240684_at    | -                | -0,512251684 | -0,765504029 | 0,253252344 |  |
| 209029_at    | COPS7A           | 2,861566439  | 2,608344689  | 0,25322175  |  |
| 235882_at    | VPS53            | 0,911589958  | 0,658444279  | 0,253145679 |  |
| 218327_s_at  | SNAP29           | 3,279650757  | 3,026519779  | 0,253130978 |  |
| 232491_at    | -                | 0,457392764  | 0,204310755  | 0,253082009 |  |
| 244002_at    | -                | 0,457392764  | 0,204310755  | 0,253082009 |  |
| 238719_at    | MIR3661 /// PPP2 | 1,912238072  | 1,659204017  | 0,253034055 |  |
| 236314_at    | EPM2AIP1         | 1,129248302  | 0,876248481  | 0,252999821 |  |
| 1554523_a_at | CNNM2            | 0,747935635  | 0,495031851  | 0,252903785 |  |
| 221618_s_at  | TAF9B            | 1,318332599  | 1,065442793  | 0,252889806 |  |
| 230685_at    | FLJ33630         | 0,228146222  | -0,024572586 | 0,252718808 |  |
| 244136_at    | LOC100507261     | 0,228146222  | -0,024572586 | 0,252718808 |  |
| 244204_at    | -                | 0,228146222  | -0,024572586 | 0,252718808 |  |
| 211668_s_at  | PLAU             | 1,512180019  | 1,259496994  | 0,252683024 |  |
| 235989_at    | -                | 1,683039483  | 1,43051703   | 0,252522453 |  |
| 224644_at    | FGD5-AS1         | 4,244953702  | 3,992437318  | 0,252516384 |  |
| 201367_s_at  | ZFP36L2          | 1,814495998  | 1,562009954  | 0,252486044 |  |
| 200994_at    | IPO7             | 4,625505141  | 4,373134192  | 0,252370948 |  |
| 208615_s_at  | PTP4A2           | 3,734704399  | 3,482360311  | 0,252344088 |  |
| 203075_at    | SMAD2            | 2,277177578  | 2,024923328  | 0,252254251 |  |
| 238637_at    | -                | 1,751865623  | 1,499637023  | 0,2522286   |  |
| 1554080_at   | RQCD1            | 2,380152406  | 2,127967638  | 0,252184768 |  |
| 212408_at    | TOR1AIP1         | 4,587453139  | 4,335292864  | 0,252160276 |  |
| 218098_at    | ARFGEF2          | 3,936854923  | 3,684723168  | 0,252131754 |  |
| 213736_at    | COX5B            | 1,795990708  | 1,543943227  | 0,25204748  |  |
| 229265_at    | SKI              | 3,994121175  | 3,742106442  | 0,252014733 |  |
| 236114_at    | -                | 0,95671774   | 0,704715219  | 0,252002521 |  |
| 242240_at    | -                | 0,95671774   | 0,704715219  | 0,252002521 |  |
| 1556434_at   | -                | -0,394749123 | -0,646746079 | 0,251996955 |  |
| 210666_at    | IDS              | -0,394749123 | -0,646746079 | 0,251996955 |  |
| 226699_at    | FCHSD1           | -0,394749123 | -0,646746079 | 0,251996955 |  |
| 229229_at    | AGXT2            | -0,394749123 | -0,646746079 | 0,251996955 |  |
| 211385_x_at  | SULT1A2          | 1,381753566  | 1,129843209  | 0,251910358 |  |
| 210539_at    | TTLL5            | 0,03125738   | -0,220592223 | 0,251849603 |  |
| 240873_x_at  | DAB2             | 0,03125738   | -0,220592223 | 0,251849603 |  |
| 203474_at    | IQGAP2           | 5,330008035  | 5,078176444  | 0,25183159  |  |
| 204928_s_at  | SLC10A3          | 1,732533761  | 1,480766833  | 0,251766929 |  |
| 213405_at    | RAB22A           | 2,919702154  | 2,667949403  | 0,251752751 |  |
| 227737_at    | SRPRB            | 2,218170265  | 1,966439221  | 0,251731044 |  |
| 205133_s_at  | HSPE1            | 6,34364026   | 6,091955318  | 0,251684942 |  |
| 225195_at    | DPH3             | 4,365940246  | 4,114368048  | 0,251572199 |  |
| 229878_at    | KIAA1731         | 1,64218396   | 1,390636111  | 0,251547849 |  |
| 222011_s_at  | SNORA29 /// TC   | 3,906268218  | 3,654731437  | 0,25153678  |  |
| 215718_s_at  | PHF3             | 0,518867317  | 0,26733076   | 0,251536557 |  |
| 1569077_x_at | ZNF836           | 0,841135803  | 0,589657387  | 0,251478416 |  |
| 205160_at    | PEX11A           | 0,841135803  | 0,589657387  | 0,251478416 |  |
| 208047_s_at  | NAB1             | 0,841135803  | 0,589657387  | 0,251478416 |  |
| 208569_at    | HIST1H2AB        | 0,841135803  | 0,589657387  | 0,251478416 |  |
| 244716_x_at  | TMIGD2           | 0,841135803  | 0,589657387  | 0,251478416 |  |
| 244808_at    | GRAMD1A          | 0,841135803  | 0,589657387  | 0,251478416 |  |
| 202372_at    | AURKAPS1 /// R   | 2,940912947  | 2,689475799  | 0,251437148 |  |

|             |                |              |              |             |
|-------------|----------------|--------------|--------------|-------------|
| 1557457_at  | -              | 0,171847695  | -0,079522948 | 0,251370644 |
| 232366_at   | KIAA0232       | 0,171847695  | -0,079522948 | 0,251370644 |
| 224206_x_at | MYNN           | 2,680059304  | 2,428994491  | 0,251064814 |
| 56919_at    | WDR48          | 2,572726635  | 2,321742086  | 0,250984549 |
| 213654_at   | TAF5L          | 1,823660386  | 1,572742379  | 0,250918007 |
| 223982_s_at | PNPLA8         | 3,292909151  | 3,042049843  | 0,250859308 |
| 227067_x_at | NOTCH2NL       | 1,496984567  | 1,246149888  | 0,250834679 |
| 222115_x_at | GLYR1          | 1,037706275  | 0,786897721  | 0,250808554 |
| 230483_at   | -              | 1,037706275  | 0,786897721  | 0,250808554 |
| 212748_at   | MKL1           | 1,523472489  | 1,272721751  | 0,250750738 |
| 226309_at   | DNAL1          | 1,523472489  | 1,272721751  | 0,250750738 |
| 207087_x_at | ANK1           | 1,331241794  | 1,080561626  | 0,250680168 |
| 221613_s_at | ZFAND6         | 4,549751571  | 4,299127518  | 0,250624053 |
| 1564429_at  | -              | -0,759588698 | -1,010192375 | 0,250603677 |
| 205247_at   | NOTCH4         | -0,759588698 | -1,010192375 | 0,250603677 |
| 205568_at   | AQP9           | -0,759588698 | -1,010192375 | 0,250603677 |
| 206486_at   | LAG3           | -0,759588698 | -1,010192375 | 0,250603677 |
| 207446_at   | TLR6           | -0,759588698 | -1,010192375 | 0,250603677 |
| 210939_s_at | GRM1           | -0,759588698 | -1,010192375 | 0,250603677 |
| 215036_at   | IGLC1          | -0,759588698 | -1,010192375 | 0,250603677 |
| 215110_at   | LOC100288974 / | -0,759588698 | -1,010192375 | 0,250603677 |
| 228742_at   | -              | -0,759588698 | -1,010192375 | 0,250603677 |
| 237699_at   | LINC00427      | -0,759588698 | -1,010192375 | 0,250603677 |
| 239415_at   | MAP9           | -0,759588698 | -1,010192375 | 0,250603677 |
| 230177_at   | GTF2H2B        | 1,926486359  | 1,675891488  | 0,250594871 |
| 32042_at    | ENOX2          | 0,417596972  | 0,167023565  | 0,250573407 |
| 211953_s_at | IPO5           | 4,546987586  | 4,296432174  | 0,250555412 |
| 229885_at   | RSF1           | 1,143956113  | 0,893473268  | 0,250482845 |
| 213540_at   | HSD17B8        | 1,805273023  | 1,55481039   | 0,250462633 |
| 225598_at   | SLC45A4        | 1,649074067  | 1,398700978  | 0,250373088 |
| 228061_at   | CCDC126        | 0,888485433  | 0,638150376  | 0,250335057 |
| 232282_at   | WNK3           | 2,446911392  | 2,196649505  | 0,250261887 |
| 201386_s_at | DHX15          | 5,333754759  | 5,083502044  | 0,250252715 |
| 1554887_at  | -              | -0,285837228 | -0,536087151 | 0,250249922 |
| 1560278_at  | LOC221122      | -0,285837228 | -0,536087151 | 0,250249922 |
| 224072_s_at | KCNK9          | -0,285837228 | -0,536087151 | 0,250249922 |
| 239476_at   | -              | -0,285837228 | -0,536087151 | 0,250249922 |
| 243181_at   | ANKIB1         | -0,285837228 | -0,536087151 | 0,250249922 |
| 229650_s_at | C19orf42       | 4,170287948  | 3,920040657  | 0,250247291 |
| 221190_s_at | C18orf8        | 2,194816625  | 1,944570415  | 0,25024621  |
| 205517_at   | GATA4          | -0,033456564 | -0,283667828 | 0,250211263 |
| 207530_s_at | CDKN2B         | -0,033456564 | -0,283667828 | 0,250211263 |
| 215651_at   | -              | -0,033456564 | -0,283667828 | 0,250211263 |
| 230313_at   | -              | -0,033456564 | -0,283667828 | 0,250211263 |
| 234926_s_at | C20orf43       | 5,141940812  | 4,891829281  | 0,250111532 |
| 201869_s_at | TBL1X          | 1,305306849  | 1,055274826  | 0,250032024 |
| 203725_at   | GADD45A        | 5,545425037  | 5,295413712  | 0,250011324 |
| 218091_at   | AGFG1          | 3,527851575  | 3,277845403  | 0,250006172 |
| 34408_at    | RTN2           | 2,737756747  | 2,487827245  | 0,249929503 |
| 223469_at   | PGPEP1         | 1,114389003  | 0,864649967  | 0,249739036 |
| 238725_at   | IRF1           | 1,114389003  | 0,864649967  | 0,249739036 |
| 211961_s_at | RAB7A          | 4,346467354  | 4,096815476  | 0,249651878 |
| 1561402_at  | LOC339894      | -1,173767127 | -1,423348341 | 0,249581215 |
| 204644_at   | ENOX2          | -1,173767127 | -1,423348341 | 0,249581215 |
| 204989_s_at | ITGB4          | -1,173767127 | -1,423348341 | 0,249581215 |
| 224241_s_at | -              | -1,173767127 | -1,423348341 | 0,249581215 |

|              |                |              |              |             |  |
|--------------|----------------|--------------|--------------|-------------|--|
| 231587_at    | APOC3          | -1,173767127 | -1,423348341 | 0,249581215 |  |
| 233297_s_at  | CCDC169 /// CC | -1,173767127 | -1,423348341 | 0,249581215 |  |
| 241830_at    | C20orf112      | -1,173767127 | -1,423348341 | 0,249581215 |  |
| 1555345_at   | SLC38A4        | -2,597496523 | -2,847001814 | 0,249505291 |  |
| 1556933_at   | -              | -2,597496523 | -2,847001814 | 0,249505291 |  |
| 1557094_at   | LOC100652762   | -2,597496523 | -2,847001814 | 0,249505291 |  |
| 1557512_at   | -              | -2,597496523 | -2,847001814 | 0,249505291 |  |
| 1561461_at   | -              | -2,597496523 | -2,847001814 | 0,249505291 |  |
| 215531_s_at  | GABRA5         | -2,597496523 | -2,847001814 | 0,249505291 |  |
| 217546_at    | MT1M           | -2,597496523 | -2,847001814 | 0,249505291 |  |
| 220468_at    | ARL14          | -2,597496523 | -2,847001814 | 0,249505291 |  |
| 223949_at    | TMPRSS3        | -2,597496523 | -2,847001814 | 0,249505291 |  |
| 226237_at    | COL8A1         | -2,597496523 | -2,847001814 | 0,249505291 |  |
| 229857_s_at  | KANSL1-AS1     | -2,597496523 | -2,847001814 | 0,249505291 |  |
| 234204_at    | -              | -2,597496523 | -2,847001814 | 0,249505291 |  |
| 234235_at    | -              | -2,597496523 | -2,847001814 | 0,249505291 |  |
| 240059_at    | -              | -2,597496523 | -2,847001814 | 0,249505291 |  |
| 240153_at    | ILDR2          | -2,597496523 | -2,847001814 | 0,249505291 |  |
| 242318_at    | TAPT1          | -2,597496523 | -2,847001814 | 0,249505291 |  |
| 242409_at    | -              | -2,597496523 | -2,847001814 | 0,249505291 |  |
| 1556178_x_at | TAF8           | 1,81142822   | 1,562009954  | 0,249418266 |  |
| 221050_s_at  | GTPBP2         | 1,81142822   | 1,562009954  | 0,249418266 |  |
| 208644_at    | PARP1          | 4,301804532  | 4,052455702  | 0,24934883  |  |
| 238879_at    | DCUN1D1        | 2,247975581  | 1,998633167  | 0,249342414 |  |
| 210904_s_at  | IL13RA1        | 0,97328325   | 0,724100169  | 0,249183081 |  |
| 202406_s_at  | TIAL1          | 4,820834741  | 4,571665519  | 0,249169222 |  |
| 219723_x_at  | AGPAT3         | 1,153678675  | 0,904843258  | 0,248835417 |  |
| 233021_at    | RBM26-AS1      | 1,153678675  | 0,904843258  | 0,248835417 |  |
| 218449_at    | UFSP2          | 3,598072957  | 3,349287209  | 0,248785748 |  |
| 213535_s_at  | UBE2I          | 5,442105403  | 5,193345242  | 0,248760161 |  |
| 1557276_at   | LOC100507584   | 1,58584542   | 1,337086025  | 0,248759395 |  |
| 205654_at    | C4BPA          | 0,682279745  | 0,433557298  | 0,248722447 |  |
| 219254_at    | C17orf101      | 0,682279745  | 0,433557298  | 0,248722447 |  |
| 219751_at    | SETD6          | 0,682279745  | 0,433557298  | 0,248722447 |  |
| 209007_s_at  | C1orf63        | 4,328338611  | 4,079673902  | 0,24866471  |  |
| 213062_at    | NTAN1          | 2,611163891  | 2,362515214  | 0,248648677 |  |
| 209857_s_at  | SPHK2          | 0,728550685  | 0,479907041  | 0,248643644 |  |
| 228118_x_at  | C16orf13       | 0,728550685  | 0,479907041  | 0,248643644 |  |
| 219124_at    | TTI2           | 2,456762221  | 2,208167653  | 0,248594568 |  |
| 222686_s_at  | CPPED1         | 2,014487247  | 1,765933685  | 0,248553562 |  |
| 222039_at    | KIF18B         | 3,358484112  | 3,109937707  | 0,248546405 |  |
| 55081_at     | MICALL1        | 1,562314261  | 1,313817865  | 0,248496395 |  |
| 229961_x_at  | YJEFN3         | 0,052199481  | -0,19610998  | 0,248309461 |  |
| 212240_s_at  | PIK3R1         | 1,485482016  | 1,23718272   | 0,248299296 |  |
| 1556750_at   | LOC153577      | -1,838812296 | -2,086984744 | 0,248172447 |  |
| 1556753_s_at | -              | -1,838812296 | -2,086984744 | 0,248172447 |  |
| 1560030_at   | LOC283692      | -1,838812296 | -2,086984744 | 0,248172447 |  |
| 1562477_at   | EBF2           | -1,838812296 | -2,086984744 | 0,248172447 |  |
| 1564996_at   | -              | -1,838812296 | -2,086984744 | 0,248172447 |  |
| 1565635_at   | -              | -1,838812296 | -2,086984744 | 0,248172447 |  |
| 1565889_at   | -              | -1,838812296 | -2,086984744 | 0,248172447 |  |
| 1566524_a_at | -              | -1,838812296 | -2,086984744 | 0,248172447 |  |
| 1570439_at   | -              | -1,838812296 | -2,086984744 | 0,248172447 |  |
| 206522_at    | MGAM           | -1,838812296 | -2,086984744 | 0,248172447 |  |
| 208423_s_at  | MSR1           | -1,838812296 | -2,086984744 | 0,248172447 |  |
| 209016_s_at  | KRT7           | -1,838812296 | -2,086984744 | 0,248172447 |  |

|              |                   |              |              |             |  |
|--------------|-------------------|--------------|--------------|-------------|--|
| 214134_at    | C2orf55           | -1,838812296 | -2,086984744 | 0,248172447 |  |
| 214204_at    | PACRG             | -1,838812296 | -2,086984744 | 0,248172447 |  |
| 214234_s_at  | CYP3A5            | -1,838812296 | -2,086984744 | 0,248172447 |  |
| 214477_at    | MLLT1             | -1,838812296 | -2,086984744 | 0,248172447 |  |
| 216268_s_at  | JAG1              | -1,838812296 | -2,086984744 | 0,248172447 |  |
| 217226_s_at  | SFXN3             | -1,838812296 | -2,086984744 | 0,248172447 |  |
| 219876_s_at  | GOLGA2P5          | -1,838812296 | -2,086984744 | 0,248172447 |  |
| 220577_at    | GVINP1            | -1,838812296 | -2,086984744 | 0,248172447 |  |
| 229487_at    | EBF1              | -1,838812296 | -2,086984744 | 0,248172447 |  |
| 231174_s_at  | -                 | -1,838812296 | -2,086984744 | 0,248172447 |  |
| 234693_at    | -                 | -1,838812296 | -2,086984744 | 0,248172447 |  |
| 238090_at    | HGSNAT            | -1,838812296 | -2,086984744 | 0,248172447 |  |
| 238878_at    | ARX               | -1,838812296 | -2,086984744 | 0,248172447 |  |
| 240416_at    | -                 | -1,838812296 | -2,086984744 | 0,248172447 |  |
| 240694_at    | -                 | -1,838812296 | -2,086984744 | 0,248172447 |  |
| 242239_at    | -                 | 0,255492549  | 0,007421914  | 0,248070635 |  |
| 223570_at    | MCM10             | 2,819431021  | 2,571362843  | 0,248068177 |  |
| 213415_at    | CLIC2             | 2,089851283  | 1,841838775  | 0,248012509 |  |
| 228244_at    | BLOC1S3           | 2,089851283  | 1,841838775  | 0,248012509 |  |
| 218895_at    | GPATCH3           | 1,709647566  | 1,461646549  | 0,248001016 |  |
| 1560297_at   | -                 | 0,376672223  | 0,128747141  | 0,247925083 |  |
| 208332_at    | LOC100509646 /    | 0,376672223  | 0,128747141  | 0,247925083 |  |
| 233244_at    | -                 | 0,376672223  | 0,128747141  | 0,247925083 |  |
| 204298_s_at  | LOX               | 0,541261317  | 0,293518836  | 0,247742481 |  |
| 226803_at    | CHMP4C            | 0,641402394  | 0,393761504  | 0,24764089  |  |
| 228683_s_at  | KCTD15            | 0,641402394  | 0,393761504  | 0,24764089  |  |
| 242766_at    | -                 | 0,641402394  | 0,393761504  | 0,24764089  |  |
| 201621_at    | NBL1              | -0,366776884 | -0,614371577 | 0,247594693 |  |
| 210099_at    | ABCA2             | -0,366776884 | -0,614371577 | 0,247594693 |  |
| 213265_at    | PGA3 /// PGA4 /// | -0,366776884 | -0,614371577 | 0,247594693 |  |
| 217254_s_at  | EPO               | -0,366776884 | -0,614371577 | 0,247594693 |  |
| 232844_at    | IFT140            | -0,366776884 | -0,614371577 | 0,247594693 |  |
| 234674_at    | -                 | -0,366776884 | -0,614371577 | 0,247594693 |  |
| 235219_at    | C5orf55           | -0,366776884 | -0,614371577 | 0,247594693 |  |
| 239036_at    | EIF2C1            | -0,366776884 | -0,614371577 | 0,247594693 |  |
| 244176_at    | -                 | -0,366776884 | -0,614371577 | 0,247594693 |  |
| 244491_at    | -                 | -0,366776884 | -0,614371577 | 0,247594693 |  |
| 1554897_s_at | RHBDL2            | -1,964176657 | -2,211750327 | 0,247573671 |  |
| 1555163_at   | -                 | -1,964176657 | -2,211750327 | 0,247573671 |  |
| 1556072_at   | LINC00528         | -1,964176657 | -2,211750327 | 0,247573671 |  |
| 1556239_a_at | -                 | -1,964176657 | -2,211750327 | 0,247573671 |  |
| 1558703_at   | SLC46A1           | -1,964176657 | -2,211750327 | 0,247573671 |  |
| 1561104_at   | -                 | -1,964176657 | -2,211750327 | 0,247573671 |  |
| 1561706_at   | -                 | -1,964176657 | -2,211750327 | 0,247573671 |  |
| 1563913_at   | -                 | -1,964176657 | -2,211750327 | 0,247573671 |  |
| 1564149_at   | -                 | -1,964176657 | -2,211750327 | 0,247573671 |  |
| 1564962_at   | ZNF92             | -1,964176657 | -2,211750327 | 0,247573671 |  |
| 1565616_at   | -                 | -1,964176657 | -2,211750327 | 0,247573671 |  |
| 1566709_at   | -                 | -1,964176657 | -2,211750327 | 0,247573671 |  |
| 203868_s_at  | VCAM1             | -1,964176657 | -2,211750327 | 0,247573671 |  |
| 205092_x_at  | ZBTB1             | -1,964176657 | -2,211750327 | 0,247573671 |  |
| 210268_at    | NFX1              | -1,964176657 | -2,211750327 | 0,247573671 |  |
| 213029_at    | NFIB              | -1,964176657 | -2,211750327 | 0,247573671 |  |
| 214811_at    | RIMBP2            | -1,964176657 | -2,211750327 | 0,247573671 |  |
| 215065_at    | PHF8              | -1,964176657 | -2,211750327 | 0,247573671 |  |
| 216617_s_at  | MAG               | -1,964176657 | -2,211750327 | 0,247573671 |  |



|              |                 |              |              |             |  |
|--------------|-----------------|--------------|--------------|-------------|--|
| 230835_at    | KRTDAP          | -1,964176657 | -2,211750327 | 0,247573671 |  |
| 230838_s_at  | CIAPIN1         | -1,964176657 | -2,211750327 | 0,247573671 |  |
| 233808_at    | -               | -1,964176657 | -2,211750327 | 0,247573671 |  |
| 238993_at    | MATR3           | -1,964176657 | -2,211750327 | 0,247573671 |  |
| 240905_at    | -               | -1,964176657 | -2,211750327 | 0,247573671 |  |
| 241258_at    | -               | -1,964176657 | -2,211750327 | 0,247573671 |  |
| 200835_s_at  | MAP4            | 0,779676066  | 0,532164371  | 0,247511695 |  |
| 1555725_a_at | RGS5            | -1,71423189  | -1,961547147 | 0,247315258 |  |
| 1557770_at   | IPO11           | -1,71423189  | -1,961547147 | 0,247315258 |  |
| 1567357_at   | NAV2            | -1,71423189  | -1,961547147 | 0,247315258 |  |
| 206462_s_at  | NTRK3           | -1,71423189  | -1,961547147 | 0,247315258 |  |
| 207756_at    | -               | -1,71423189  | -1,961547147 | 0,247315258 |  |
| 211524_at    | NFKB2           | -1,71423189  | -1,961547147 | 0,247315258 |  |
| 214860_at    | SLC9A7          | -1,71423189  | -1,961547147 | 0,247315258 |  |
| 216935_at    | LINC00302       | -1,71423189  | -1,961547147 | 0,247315258 |  |
| 222783_s_at  | SMOC1           | -1,71423189  | -1,961547147 | 0,247315258 |  |
| 228704_s_at  | CLDN23          | -1,71423189  | -1,961547147 | 0,247315258 |  |
| 232886_at    | -               | -1,71423189  | -1,961547147 | 0,247315258 |  |
| 233592_at    | ANKRD18B        | -1,71423189  | -1,961547147 | 0,247315258 |  |
| 237272_at    | LOC100506907    | -1,71423189  | -1,961547147 | 0,247315258 |  |
| 238287_at    | SLC7A13         | -1,71423189  | -1,961547147 | 0,247315258 |  |
| 240720_at    | -               | -1,71423189  | -1,961547147 | 0,247315258 |  |
| 242956_at    | -               | -1,71423189  | -1,961547147 | 0,247315258 |  |
| 221073_s_at  | NOD1            | 1,094335495  | 0,847075464  | 0,247260031 |  |
| 225711_at    | ARL6IP6         | 1,965648824  | 1,718396606  | 0,247252218 |  |
| 1552943_at   | GABRG1          | -2,930741289 | -3,177802286 | 0,247060997 |  |
| 1555357_at   | DDX53           | -2,930741289 | -3,177802286 | 0,247060997 |  |
| 1559147_at   | -               | -2,930741289 | -3,177802286 | 0,247060997 |  |
| 1559839_at   | TBX18           | -2,930741289 | -3,177802286 | 0,247060997 |  |
| 1560538_at   | -               | -2,930741289 | -3,177802286 | 0,247060997 |  |
| 1561855_x_at | -               | -2,930741289 | -3,177802286 | 0,247060997 |  |
| 206893_at    | SALL1           | -2,930741289 | -3,177802286 | 0,247060997 |  |
| 214587_at    | COL8A1          | -2,930741289 | -3,177802286 | 0,247060997 |  |
| 216874_at    | -               | -2,930741289 | -3,177802286 | 0,247060997 |  |
| 224989_at    | -               | -2,930741289 | -3,177802286 | 0,247060997 |  |
| 229199_at    | SCN9A           | -2,930741289 | -3,177802286 | 0,247060997 |  |
| 237830_at    | -               | -2,930741289 | -3,177802286 | 0,247060997 |  |
| 238900_at    | HLA-DRB1 /// HL | -2,930741289 | -3,177802286 | 0,247060997 |  |
| 244130_at    | HTR2A           | -2,930741289 | -3,177802286 | 0,247060997 |  |
| 1553271_at   | DIP2B           | -2,64318869  | -2,89013181  | 0,246943121 |  |
| 1555367_at   | ZNF479          | -2,64318869  | -2,89013181  | 0,246943121 |  |
| 1560673_at   | -               | -2,64318869  | -2,89013181  | 0,246943121 |  |
| 1560676_at   | SIAH3           | -2,64318869  | -2,89013181  | 0,246943121 |  |
| 1561777_at   | -               | -2,64318869  | -2,89013181  | 0,246943121 |  |
| 1566217_at   | -               | -2,64318869  | -2,89013181  | 0,246943121 |  |
| 1570180_at   | -               | -2,64318869  | -2,89013181  | 0,246943121 |  |
| 207706_at    | USH2A           | -2,64318869  | -2,89013181  | 0,246943121 |  |
| 215303_at    | DCLK1           | -2,64318869  | -2,89013181  | 0,246943121 |  |
| 220402_at    | TP53AIP1        | -2,64318869  | -2,89013181  | 0,246943121 |  |
| 228218_at    | LSAMP           | -2,64318869  | -2,89013181  | 0,246943121 |  |
| 230412_at    | NPAS3           | -2,64318869  | -2,89013181  | 0,246943121 |  |
| 231875_at    | KIF21A          | -2,64318869  | -2,89013181  | 0,246943121 |  |
| 232839_at    | -               | -2,64318869  | -2,89013181  | 0,246943121 |  |
| 235490_at    | TMEM107         | -2,64318869  | -2,89013181  | 0,246943121 |  |
| 235800_at    | -               | -2,64318869  | -2,89013181  | 0,246943121 |  |
| 235978_at    | FABP4           | -2,64318869  | -2,89013181  | 0,246943121 |  |

|              |                  |              |              |             |  |
|--------------|------------------|--------------|--------------|-------------|--|
| 237020_at    | CATSPERD         | -2,64318869  | -2,89013181  | 0,246943121 |  |
| 240884_at    | CCDC14           | -2,64318869  | -2,89013181  | 0,246943121 |  |
| 242869_at    | -                | -2,64318869  | -2,89013181  | 0,246943121 |  |
| 243378_at    | -                | -2,64318869  | -2,89013181  | 0,246943121 |  |
| 243775_at    | -                | -2,64318869  | -2,89013181  | 0,246943121 |  |
| 244443_at    | CHD2             | -2,64318869  | -2,89013181  | 0,246943121 |  |
| 226594_at    | ENTPD5           | 2,646022818  | 2,39915583   | 0,246866988 |  |
| 225212_at    | SLC25A25         | 1,247462054  | 1,000684521  | 0,246777533 |  |
| 227692_at    | GNAI1            | 3,566577193  | 3,319860027  | 0,246717165 |  |
| 224600_at    | CGGBP1           | 3,097712429  | 2,851017268  | 0,246695161 |  |
| 218243_at    | RUFY1            | 4,563948403  | 4,317323511  | 0,246624891 |  |
| 213743_at    | CCNT2            | 2,522021211  | 2,275409734  | 0,246611477 |  |
| 1558969_a_at | RPL32P3          | 0,20027154   | -0,046302147 | 0,246573686 |  |
| 236467_at    | ERICH1 /// FLJ00 | 0,20027154   | -0,046302147 | 0,246573686 |  |
| 230562_at    | LOC100507530     | 0,496120222  | 0,249604176  | 0,246516046 |  |
| 234464_s_at  | EME1             | 4,337431458  | 4,090916839  | 0,246514619 |  |
| 233319_x_at  | -                | 0,87091093   | 0,624460759  | 0,246450171 |  |
| 201634_s_at  | CYB5B            | 3,378314944  | 3,131875186  | 0,246439758 |  |
| 220042_x_at  | HIVEP3           | 1,168140757  | 0,921731975  | 0,246408782 |  |
| 206473_at    | MBTPS2           | 1,233777334  | 0,987376598  | 0,246400736 |  |
| 1555765_a_at | GNG4             | 1,549482847  | 1,303116084  | 0,246366762 |  |
| 1556082_a_at | -                | -1,131062212 | -1,377419394 | 0,246357182 |  |
| 1557042_at   | KCNQ3            | -1,131062212 | -1,377419394 | 0,246357182 |  |
| 1559491_at   | -                | -1,131062212 | -1,377419394 | 0,246357182 |  |
| 1560353_at   | -                | -1,131062212 | -1,377419394 | 0,246357182 |  |
| 1563121_at   | -                | -1,131062212 | -1,377419394 | 0,246357182 |  |
| 220562_at    | CYP2W1           | -1,131062212 | -1,377419394 | 0,246357182 |  |
| 221271_at    | IL21             | -1,131062212 | -1,377419394 | 0,246357182 |  |
| 234323_at    | THSD4            | -1,131062212 | -1,377419394 | 0,246357182 |  |
| 241891_at    | -                | -1,131062212 | -1,377419394 | 0,246357182 |  |
| 243132_at    | APTX             | -1,131062212 | -1,377419394 | 0,246357182 |  |
| 1555831_s_at | LRRC41           | 1,932146506  | 1,685812099  | 0,246334406 |  |
| 203248_at    | ZNF24            | 2,027765132  | 1,781437557  | 0,246327575 |  |
| 1566185_at   | -                | -0,172274514 | -0,41858459  | 0,246310076 |  |
| 228003_at    | RAB30            | -0,172274514 | -0,41858459  | 0,246310076 |  |
| 242069_at    | CBX5             | -0,172274514 | -0,41858459  | 0,246310076 |  |
| 218020_s_at  | ZFAND3           | 2,44295215   | 2,196649505  | 0,246302645 |  |
| 219540_at    | ZNF267           | 3,037284587  | 2,791007185  | 0,246277403 |  |
| 211063_s_at  | NCK1             | 3,563845287  | 3,317734938  | 0,246110349 |  |
| 224682_at    | ANKIB1           | 3,101484927  | 2,855418981  | 0,246065946 |  |
| 209025_s_at  | SYNCRIP          | 5,916776089  | 5,670779353  | 0,245996736 |  |
| 236555_at    | TRAF3IP2-AS1     | 1,360921491  | 1,115234684  | 0,245686807 |  |
| 1553911_at   | ZNF663           | -2,089474779 | -2,335104118 | 0,245629339 |  |
| 1557862_at   | LOC654841        | -2,089474779 | -2,335104118 | 0,245629339 |  |
| 1559771_at   | -                | -2,089474779 | -2,335104118 | 0,245629339 |  |
| 1561333_at   | -                | -2,089474779 | -2,335104118 | 0,245629339 |  |
| 1563849_at   | SH2D4B           | -2,089474779 | -2,335104118 | 0,245629339 |  |
| 1566113_at   | -                | -2,089474779 | -2,335104118 | 0,245629339 |  |
| 202565_s_at  | SVIL             | -2,089474779 | -2,335104118 | 0,245629339 |  |
| 205643_s_at  | PPP2R2B          | -2,089474779 | -2,335104118 | 0,245629339 |  |
| 207291_at    | PRRG4            | -2,089474779 | -2,335104118 | 0,245629339 |  |
| 215802_at    | -                | -2,089474779 | -2,335104118 | 0,245629339 |  |
| 216135_at    | IQCK             | -2,089474779 | -2,335104118 | 0,245629339 |  |
| 216744_at    | -                | -2,089474779 | -2,335104118 | 0,245629339 |  |
| 234050_at    | TAGAP            | -2,089474779 | -2,335104118 | 0,245629339 |  |
| 234259_at    | -                | -2,089474779 | -2,335104118 | 0,245629339 |  |

|              |                |              |              |             |  |
|--------------|----------------|--------------|--------------|-------------|--|
| 237072_at    | -              | -2,089474779 | -2,335104118 | 0,245629339 |  |
| 238608_at    | -              | -2,089474779 | -2,335104118 | 0,245629339 |  |
| 240533_at    | -              | -2,089474779 | -2,335104118 | 0,245629339 |  |
| 240679_at    | -              | -2,089474779 | -2,335104118 | 0,245629339 |  |
| 243124_at    | RRN3P2         | -2,089474779 | -2,335104118 | 0,245629339 |  |
| 243726_at    | -              | -2,089474779 | -2,335104118 | 0,245629339 |  |
| 214440_at    | NAT1           | 3,361633475  | 3,116064987  | 0,245568488 |  |
| 227594_at    | ZMYM6          | 0,917308734  | 0,67181667   | 0,245492064 |  |
| 205780_at    | BIK            | 0,702292136  | 0,456918297  | 0,245373839 |  |
| 239603_x_at  | -              | 0,702292136  | 0,456918297  | 0,245373839 |  |
| 241367_at    | TEX19          | 0,702292136  | 0,456918297  | 0,245373839 |  |
| 203538_at    | CAMLG          | 3,191547726  | 2,946258252  | 0,245289474 |  |
| 218832_x_at  | ARRB1          | 0,555999837  | 0,310717132  | 0,245282705 |  |
| 212005_at    | C1orf144       | 2,225103271  | 1,979940779  | 0,245162492 |  |
| 203956_at    | MORC2          | 5,027958036  | 4,782818545  | 0,24513949  |  |
| 203853_s_at  | GAB2           | 1,504602299  | 1,259496994  | 0,245105305 |  |
| 1561403_at   | SOHLH1         | 0,273439642  | 0,028364014  | 0,245075628 |  |
| 220303_at    | PDZD3          | 0,273439642  | 0,028364014  | 0,245075628 |  |
| 202427_s_at  | BRP44          | 3,988699475  | 3,743690278  | 0,245009197 |  |
| 203593_at    | CD2AP          | 3,838564178  | 3,593688577  | 0,244875601 |  |
| 228225_at    | PEX2           | 1,177702228  | 0,932882274  | 0,244819954 |  |
| 1557436_at   | XKR6           | -0,57445847  | -0,819238336 | 0,244779866 |  |
| 1558167_a_at | MGC16275       | -0,57445847  | -0,819238336 | 0,244779866 |  |
| 1566901_at   | TGIF1          | -0,57445847  | -0,819238336 | 0,244779866 |  |
| 210493_s_at  | MFAP3L         | -0,57445847  | -0,819238336 | 0,244779866 |  |
| 215592_at    | -              | -0,57445847  | -0,819238336 | 0,244779866 |  |
| 216404_at    | ATXN8OS        | -0,57445847  | -0,819238336 | 0,244779866 |  |
| 217715_x_at  | -              | -0,57445847  | -0,819238336 | 0,244779866 |  |
| 220164_s_at  | FBXO40         | -0,57445847  | -0,819238336 | 0,244779866 |  |
| 220588_at    | BCAS4          | -0,57445847  | -0,819238336 | 0,244779866 |  |
| 222022_at    | DTX3           | -0,57445847  | -0,819238336 | 0,244779866 |  |
| 232272_at    | ZNF624         | -0,57445847  | -0,819238336 | 0,244779866 |  |
| 233469_at    | TPTEP1         | -0,57445847  | -0,819238336 | 0,244779866 |  |
| 238530_at    | NNT            | -0,57445847  | -0,819238336 | 0,244779866 |  |
| 244396_at    | G3BP1          | -0,57445847  | -0,819238336 | 0,244779866 |  |
| 214855_s_at  | RALGAPA1       | 1,751865623  | 1,507116528  | 0,244749095 |  |
| 1558254_s_at | SRPK2          | 2,194816625  | 1,950068772  | 0,244747853 |  |
| 201974_s_at  | CCZ1           | -0,078265071 | -0,322870281 | 0,24460521  |  |
| 222261_at    | KIAA1609       | -0,078265071 | -0,322870281 | 0,24460521  |  |
| 230072_at    | TBC1D15        | -0,078265071 | -0,322870281 | 0,24460521  |  |
| 239497_at    | -              | -0,078265071 | -0,322870281 | 0,24460521  |  |
| 203762_s_at  | DYNC2LI1       | 2,05655332   | 1,811954245  | 0,244599076 |  |
| 206472_s_at  | TLE3           | 0,882651021  | 0,638150376  | 0,244500645 |  |
| 215292_s_at  | MKL1           | 0,882651021  | 0,638150376  | 0,244500645 |  |
| 221208_s_at  | MSANTD2        | 1,903621061  | 1,659204017  | 0,244417045 |  |
| 230158_at    | DPY19L2        | 1,903621061  | 1,659204017  | 0,244417045 |  |
| 224149_x_at  | LOC100287789 / | 0,798390451  | 0,553993624  | 0,244396827 |  |
| 225426_at    | PPP6C          | 2,482063962  | 2,237691445  | 0,244372517 |  |
| 225339_at    | SPAG9          | 2,094906514  | 1,85068474   | 0,244221774 |  |
| 212319_at    | SGSM2          | 0,661985843  | 0,417770464  | 0,244215379 |  |
| 215253_s_at  | RCAN1          | 0,661985843  | 0,417770464  | 0,244215379 |  |
| 1554878_a_at | ABCD3          | 2,003776245  | 1,759685182  | 0,244091063 |  |
| 241827_at    | ZNF615         | 2,003776245  | 1,759685182  | 0,244091063 |  |
| 217127_at    | CTH            | 1,946200473  | 1,702196344  | 0,244004128 |  |
| 202034_x_at  | RB1CC1         | 4,158264286  | 3,914426433  | 0,243837853 |  |
| 222386_s_at  | COPZ1          | 4,574391988  | 4,330558009  | 0,243833979 |  |

|              |                |              |              |             |  |
|--------------|----------------|--------------|--------------|-------------|--|
| 212906_at    | GRAMD1B        | 0,401366113  | 0,157549243  | 0,24381687  |  |
| 214944_at    | PHLPP2         | 1,823660386  | 1,579853228  | 0,243807158 |  |
| 1553072_at   | BNIP1L         | -1,543331864 | -1,787089803 | 0,243757939 |  |
| 1555204_at   | -              | -1,543331864 | -1,787089803 | 0,243757939 |  |
| 1555237_at   | -              | -1,543331864 | -1,787089803 | 0,243757939 |  |
| 1557841_at   | -              | -1,543331864 | -1,787089803 | 0,243757939 |  |
| 1568997_at   | POLR1E         | -1,543331864 | -1,787089803 | 0,243757939 |  |
| 214878_at    | ZNF37A         | -1,543331864 | -1,787089803 | 0,243757939 |  |
| 215066_at    | PTPRF          | -1,543331864 | -1,787089803 | 0,243757939 |  |
| 215885_at    | SSX2           | -1,543331864 | -1,787089803 | 0,243757939 |  |
| 217000_at    | -              | -1,543331864 | -1,787089803 | 0,243757939 |  |
| 217664_at    | -              | -1,543331864 | -1,787089803 | 0,243757939 |  |
| 222324_at    | -              | -1,543331864 | -1,787089803 | 0,243757939 |  |
| 222895_s_at  | BCL11B         | -1,543331864 | -1,787089803 | 0,243757939 |  |
| 224212_s_at  | PCDHA1 /// PCD | -1,543331864 | -1,787089803 | 0,243757939 |  |
| 235794_at    | MOBP           | -1,543331864 | -1,787089803 | 0,243757939 |  |
| 236856_x_at  | -              | -1,543331864 | -1,787089803 | 0,243757939 |  |
| 237590_at    | -              | -1,543331864 | -1,787089803 | 0,243757939 |  |
| 240871_at    | FAM221B        | -1,543331864 | -1,787089803 | 0,243757939 |  |
| 241476_at    | -              | -1,543331864 | -1,787089803 | 0,243757939 |  |
| 243399_at    | -              | -1,543331864 | -1,787089803 | 0,243757939 |  |
| 1553973_a_at | SPINK6         | -0,706943342 | -0,950686014 | 0,243742673 |  |
| 219827_at    | UCP3           | -0,706943342 | -0,950686014 | 0,243742673 |  |
| 220590_at    | ITFG2          | -0,706943342 | -0,950686014 | 0,243742673 |  |
| 221442_at    | MC3R           | -0,706943342 | -0,950686014 | 0,243742673 |  |
| 222274_at    | ZDHC8P1        | -0,706943342 | -0,950686014 | 0,243742673 |  |
| 222803_at    | PRTFDC1        | 1,373456798  | 1,129843209  | 0,243613589 |  |
| 219709_x_at  | FAM173A        | 2,402750389  | 2,159161028  | 0,243589361 |  |
| 203422_at    | POLD1          | 2,825526235  | 2,582026171  | 0,243500064 |  |
| 226475_at    | FAM118A        | 1,64218396   | 1,398700978  | 0,243482982 |  |
| 235060_at    | LOC100190986   | 1,64218396   | 1,398700978  | 0,243482982 |  |
| 208643_s_at  | XRCC5          | 4,714000909  | 4,470561285  | 0,243439624 |  |
| 215544_s_at  | UBOX5          | 0,760715727  | 0,51742585   | 0,243289876 |  |
| 220707_s_at  | FOXRED2        | 0,760715727  | 0,51742585   | 0,243289876 |  |
| 209273_s_at  | ISCA1          | 3,515651309  | 3,272369332  | 0,243281977 |  |
| 227973_at    | C2orf69        | 3,482282213  | 3,239069096  | 0,243213117 |  |
| 202988_s_at  | RGS1           | 0,083054335  | -0,160136748 | 0,243191083 |  |
| 228337_at    | PWWP2A         | 0,083054335  | -0,160136748 | 0,243191083 |  |
| 221741_s_at  | YTHDF1         | 4,756492437  | 4,51343626   | 0,243056176 |  |
| 209666_s_at  | CHUK           | 3,614006933  | 3,370970266  | 0,243036667 |  |
| 212745_s_at  | BBS4           | 1,69307511   | 1,450051551  | 0,24302356  |  |
| 1557474_at   | LOC284578      | -1,089016378 | -1,332017329 | 0,243000951 |  |
| 1557783_at   | LOC100133991   | -1,089016378 | -1,332017329 | 0,243000951 |  |
| 1559494_at   | SLC35G2        | -1,089016378 | -1,332017329 | 0,243000951 |  |
| 1561413_at   | -              | -1,089016378 | -1,332017329 | 0,243000951 |  |
| 1564868_a_at | FAM117B        | -1,089016378 | -1,332017329 | 0,243000951 |  |
| 206558_at    | SIM2           | -1,089016378 | -1,332017329 | 0,243000951 |  |
| 208032_s_at  | GRIA3          | -1,089016378 | -1,332017329 | 0,243000951 |  |
| 214413_at    | TAT            | -1,089016378 | -1,332017329 | 0,243000951 |  |
| 220779_at    | PADI3          | -1,089016378 | -1,332017329 | 0,243000951 |  |
| 223725_at    | GHRLOS2        | -1,089016378 | -1,332017329 | 0,243000951 |  |
| 229172_at    | HSPA12B        | -1,089016378 | -1,332017329 | 0,243000951 |  |
| 229769_at    | TMEM242        | -1,089016378 | -1,332017329 | 0,243000951 |  |
| 233456_at    | -              | -1,089016378 | -1,332017329 | 0,243000951 |  |
| 233640_x_at  | KRTAP9-4       | -1,089016378 | -1,332017329 | 0,243000951 |  |
| 236125_at    | -              | -1,089016378 | -1,332017329 | 0,243000951 |  |

|              |                |              |              |             |  |
|--------------|----------------|--------------|--------------|-------------|--|
| 238872_at    | LOC100128239   | -1,089016378 | -1,332017329 | 0,243000951 |  |
| 238935_at    | RPS27L         | 1,04816921   | 0,805216064  | 0,242953146 |  |
| 205181_at    | ZNF193         | 2,084778276  | 1,841838775  | 0,242939502 |  |
| 218786_at    | NT5DC3         | 1,011212064  | 0,768343791  | 0,242868273 |  |
| 222778_s_at  | WHSC1          | 1,011212064  | 0,768343791  | 0,242868273 |  |
| 223134_at    | BBX            | 1,011212064  | 0,768343791  | 0,242868273 |  |
| 219207_at    | EDC3           | 1,348276312  | 1,105412836  | 0,242863476 |  |
| 227986_at    | ZNF343         | 1,850809354  | 1,60795124   | 0,242858115 |  |
| 225606_at    | BCL2L11        | 3,764356332  | 3,521663705  | 0,242692627 |  |
| 227366_at    | RILP           | 3,24026957   | 2,997606395  | 0,242663175 |  |
| 208910_s_at  | C1QBP          | 6,399037585  | 6,156398017  | 0,242639567 |  |
| 1553608_a_at | LINC00189      | -2,712026959 | -2,954576755 | 0,242549796 |  |
| 1554329_x_at | STXBP4         | -2,712026959 | -2,954576755 | 0,242549796 |  |
| 1554636_at   | -              | -2,712026959 | -2,954576755 | 0,242549796 |  |
| 1561330_at   | DSG4           | -2,712026959 | -2,954576755 | 0,242549796 |  |
| 1563022_at   | CCDC160        | -2,712026959 | -2,954576755 | 0,242549796 |  |
| 1569334_at   | STRA6          | -2,712026959 | -2,954576755 | 0,242549796 |  |
| 216478_at    | -              | -2,712026959 | -2,954576755 | 0,242549796 |  |
| 216999_at    | EPOR           | -2,712026959 | -2,954576755 | 0,242549796 |  |
| 224098_at    | -              | -2,712026959 | -2,954576755 | 0,242549796 |  |
| 229435_at    | GLIS3          | -2,712026959 | -2,954576755 | 0,242549796 |  |
| 232429_at    | -              | -2,712026959 | -2,954576755 | 0,242549796 |  |
| 236327_at    | -              | -2,712026959 | -2,954576755 | 0,242549796 |  |
| 238176_at    | RAPGEF2        | -2,712026959 | -2,954576755 | 0,242549796 |  |
| 238314_x_at  | -              | -2,712026959 | -2,954576755 | 0,242549796 |  |
| 242929_at    | -              | -2,712026959 | -2,954576755 | 0,242549796 |  |
| 244014_x_at  | -              | -2,712026959 | -2,954576755 | 0,242549796 |  |
| 244736_at    | -              | -2,712026959 | -2,954576755 | 0,242549796 |  |
| 244780_at    | SGPP2          | -2,712026959 | -2,954576755 | 0,242549796 |  |
| 55662_at     | C10orf76       | 1,46610492   | 1,223626587  | 0,242478333 |  |
| 225556_at    | VMA21          | 5,078917028  | 4,836499048  | 0,24241798  |  |
| 1555420_a_at | KLF7           | -0,148196756 | -0,39061235  | 0,242415594 |  |
| 1566134_at   | CARHSP1        | -0,148196756 | -0,39061235  | 0,242415594 |  |
| 210419_at    | BARX2          | -0,148196756 | -0,39061235  | 0,242415594 |  |
| 216332_at    | POU6F1         | -0,148196756 | -0,39061235  | 0,242415594 |  |
| 223435_s_at  | PCDHA1 /// PCD | -0,148196756 | -0,39061235  | 0,242415594 |  |
| 242552_x_at  | ZBED5          | -0,148196756 | -0,39061235  | 0,242415594 |  |
| 222327_x_at  | OR7E156P       | 0,810733188  | 0,568365095  | 0,242368092 |  |
| 204262_s_at  | PSEN2          | 0,351548291  | 0,109221392  | 0,242326899 |  |
| 215723_s_at  | PLD1           | 0,351548291  | 0,109221392  | 0,242326899 |  |
| 202163_s_at  | CNOT8          | 3,352164686  | 3,109937707  | 0,242226979 |  |
| 226551_at    | RIPK1          | 2,396622324  | 2,154405725  | 0,242216598 |  |
| 214299_at    | TOP3A          | 1,089278259  | 0,847075464  | 0,242202795 |  |
| 201197_at    | AMD1           | 5,133981558  | 4,891829281  | 0,242152277 |  |
| 200890_s_at  | SSR1           | 4,329947401  | 4,08780258   | 0,242144822 |  |
| 215450_at    | SNRPE          | 4,497501866  | 4,25538582   | 0,242116047 |  |
| 226922_at    | RANBP2         | 2,227406889  | 1,98530622   | 0,242100669 |  |
| 1555051_at   | C10orf53       | -0,43775896  | -0,679763839 | 0,242004879 |  |
| 1564658_at   | NAT16          | -0,43775896  | -0,679763839 | 0,242004879 |  |
| 207491_at    | MOGAT2         | -0,43775896  | -0,679763839 | 0,242004879 |  |
| 211001_at    | TRIM29         | -0,43775896  | -0,679763839 | 0,242004879 |  |
| 232988_at    | KIAA0182       | -0,43775896  | -0,679763839 | 0,242004879 |  |
| 233398_at    | -              | -0,43775896  | -0,679763839 | 0,242004879 |  |
| 240588_at    | -              | -0,43775896  | -0,679763839 | 0,242004879 |  |
| 216092_s_at  | SLC7A8         | 1,523472489  | 1,281471383  | 0,242001106 |  |
| 201838_s_at  | SUPT7L         | 0,67554678   | 0,433557298  | 0,241989482 |  |

|              |                 |              |              |             |  |
|--------------|-----------------|--------------|--------------|-------------|--|
| 205614_x_at  | MST1            | 0,67554678   | 0,433557298  | 0,241989482 |  |
| 201285_at    | MKRN1           | 4,818544611  | 4,576561638  | 0,241982973 |  |
| 204060_s_at  | PRKX /// PRKY   | 2,178241192  | 1,936283387  | 0,241957804 |  |
| 208892_s_at  | DUSP6           | 3,517535002  | 3,275657468  | 0,241877534 |  |
| 227624_at    | TET2            | 1,442503549  | 1,200746069  | 0,241757479 |  |
| 1570607_at   | -               | 0,57782909   | 0,336136178  | 0,241692913 |  |
| 241387_at    | -               | 0,57782909   | 0,336136178  | 0,241692913 |  |
| 218853_s_at  | MOSPD1          | 2,44295215   | 2,201267805  | 0,241684345 |  |
| 235824_at    | -               | 0,900083947  | 0,658444279  | 0,241639668 |  |
| 203816_at    | DGUOK           | 2,981056773  | 2,739547836  | 0,241508937 |  |
| 214291_at    | RPL17 /// RPL17 | 2,001086023  | 1,759685182  | 0,241400841 |  |
| 213524_s_at  | G0S2            | 3,335176289  | 3,09388391   | 0,241292379 |  |
| 1552501_a_at | GPBAR1          | 0,020670649  | -0,220592223 | 0,241262873 |  |
| 220420_at    | LMAN1L          | 0,020670649  | -0,220592223 | 0,241262873 |  |
| 233030_at    | PNPLA3          | 0,020670649  | -0,220592223 | 0,241262873 |  |
| 233149_at    | -               | 0,020670649  | -0,220592223 | 0,241262873 |  |
| 237336_at    | ADD2            | 0,020670649  | -0,220592223 | 0,241262873 |  |
| 211535_s_at  | FGFR1           | 2,077135162  | 1,835911187  | 0,241223975 |  |
| 212063_at    | CD44            | 3,541801785  | 3,300620584  | 0,241181201 |  |
| 238597_at    | ANKRD13C        | 0,417596971  | 0,176436073  | 0,241160897 |  |
| 224614_at    | DYNC1LI2        | 1,631786706  | 1,390636111  | 0,241150595 |  |
| 212231_at    | FBXO21          | 2,281618189  | 2,040470494  | 0,241147695 |  |
| 1569345_at   | -               | -0,325749314 | -0,566887459 | 0,241138145 |  |
| 206401_s_at  | MAPT            | -0,325749314 | -0,566887459 | 0,241138145 |  |
| 231811_at    | LOC100134445 /  | -0,325749314 | -0,566887459 | 0,241138145 |  |
| 201370_s_at  | CUL3            | 2,644299732  | 2,403170156  | 0,241129576 |  |
| 212891_s_at  | GADD45GIP1      | 3,381421359  | 3,140317145  | 0,241104214 |  |
| 1558606_s_at | -               | -2,262747984 | -2,503677622 | 0,240929638 |  |
| 1560413_at   | LOC339788       | -2,262747984 | -2,503677622 | 0,240929638 |  |
| 1562802_at   | LINC00210       | -2,262747984 | -2,503677622 | 0,240929638 |  |
| 201983_s_at  | EGFR            | -2,262747984 | -2,503677622 | 0,240929638 |  |
| 206518_s_at  | RGS9            | -2,262747984 | -2,503677622 | 0,240929638 |  |
| 208346_at    | PPBPP2          | -2,262747984 | -2,503677622 | 0,240929638 |  |
| 214307_at    | HGD             | -2,262747984 | -2,503677622 | 0,240929638 |  |
| 216664_at    | -               | -2,262747984 | -2,503677622 | 0,240929638 |  |
| 217582_at    | -               | -2,262747984 | -2,503677622 | 0,240929638 |  |
| 228137_s_at  | PPP2R2C         | -2,262747984 | -2,503677622 | 0,240929638 |  |
| 230730_at    | SGCD            | -2,262747984 | -2,503677622 | 0,240929638 |  |
| 235021_at    | KIAA2026        | -2,262747984 | -2,503677622 | 0,240929638 |  |
| 237288_at    | TGM7            | -2,262747984 | -2,503677622 | 0,240929638 |  |
| 240266_at    | -               | -2,262747984 | -2,503677622 | 0,240929638 |  |
| 240582_x_at  | -               | -2,262747984 | -2,503677622 | 0,240929638 |  |
| 244545_at    | LOC100652770    | -2,262747984 | -2,503677622 | 0,240929638 |  |
| 244551_at    | FLJ43489        | -2,262747984 | -2,503677622 | 0,240929638 |  |
| 219021_at    | RNF121          | 1,556829052  | 1,315948728  | 0,240880324 |  |
| 218081_at    | C20orf27        | 3,088871381  | 2,848075314  | 0,240796067 |  |
| 226125_at    | LOC100288152    | 1,331241794  | 1,090553537  | 0,240688257 |  |
| 204831_at    | CDK8            | 3,821129803  | 3,580454966  | 0,240674837 |  |
| 206937_at    | SPTA1           | 3,912008086  | 3,671470423  | 0,240537662 |  |
| 212508_at    | MOAP1           | 3,982575608  | 3,742106442  | 0,240469165 |  |
| 222497_x_at  | NMD3            | 4,366985384  | 4,126559358  | 0,240426027 |  |
| 226634_at    | METTL10         | 0,533835206  | 0,293518836  | 0,240316371 |  |
| 1560830_a_at | LOC147646       | 1,027166904  | 0,786897721  | 0,240269183 |  |
| 225764_at    | ETV6            | 3,540875956  | 3,300620584  | 0,240255372 |  |
| 226792_s_at  | KIFC2           | 1,394109935  | 1,153866761  | 0,240243174 |  |
| 209188_x_at  | DR1             | 3,50144467   | 3,261354437  | 0,240090233 |  |

|              |                 |              |              |             |  |
|--------------|-----------------|--------------|--------------|-------------|--|
| 1861_at      | BAD             | 0,613492853  | 0,373444244  | 0,240048609 |  |
| 232560_at    | UROS            | 0,735041319  | 0,495031851  | 0,240009469 |  |
| 1555908_at   | FAM120A         | -0,221656139 | -0,461594427 | 0,239938288 |  |
| 227323_at    | COX4I1          | -0,221656139 | -0,461594427 | 0,239938288 |  |
| 239383_at    | -               | -0,221656139 | -0,461594427 | 0,239938288 |  |
| 229780_at    | -               | 0,103263601  | -0,136643983 | 0,239907584 |  |
| 217039_x_at  | ELK2AP /// LOC1 | 2,482063962  | 2,242180416  | 0,239883546 |  |
| 219178_at    | QTRTD1          | 1,305306849  | 1,065442793  | 0,239864056 |  |
| 1563591_at   | LOC100506403 /  | -2,756478458 | -2,996335703 | 0,239857245 |  |
| 1565525_a_at | TCP11L2         | -2,756478458 | -2,996335703 | 0,239857245 |  |
| 1567174_at   | -               | -2,756478458 | -2,996335703 | 0,239857245 |  |
| 206198_s_at  | CEACAM7         | -2,756478458 | -2,996335703 | 0,239857245 |  |
| 214887_at    | N4BP2L1         | -2,756478458 | -2,996335703 | 0,239857245 |  |
| 222213_x_at  | -               | -2,756478458 | -2,996335703 | 0,239857245 |  |
| 231391_at    | CTXN3           | -2,756478458 | -2,996335703 | 0,239857245 |  |
| 234057_at    | -               | -2,756478458 | -2,996335703 | 0,239857245 |  |
| 234374_at    | -               | -2,756478458 | -2,996335703 | 0,239857245 |  |
| 236650_at    | -               | -2,756478458 | -2,996335703 | 0,239857245 |  |
| 240349_at    | PRKAA2          | -2,756478458 | -2,996335703 | 0,239857245 |  |
| 241457_at    | -               | -2,756478458 | -2,996335703 | 0,239857245 |  |
| 208623_s_at  | EZR             | 3,482282213  | 3,242433922  | 0,239848291 |  |
| 205794_s_at  | NOVA1           | 1,454352496  | 1,214517879  | 0,239834618 |  |
| 229872_s_at  | LOC100132999 /  | 1,454352496  | 1,214517879  | 0,239834618 |  |
| 230490_x_at  | RSU1            | 2,382221458  | 2,14244844   | 0,239773018 |  |
| 200719_at    | SKP1            | 1,932146506  | 1,692388143  | 0,239758363 |  |
| 225213_at    | PPTC7           | 4,445269027  | 4,205686812  | 0,239582214 |  |
| 220175_s_at  | CBWD1 /// CBW1  | 3,484209953  | 3,244672787  | 0,239537166 |  |
| 230621_at    | IAH1            | 2,470441349  | 2,230931691  | 0,239509658 |  |
| 212037_at    | PNN             | 5,193516382  | 4,954036493  | 0,23947989  |  |
| 209154_at    | P2RX5-TAX1BP3   | 4,887536743  | 4,648076762  | 0,239459982 |  |
| 203467_at    | PMM1            | 1,369290453  | 1,129843209  | 0,239447244 |  |
| 215011_at    | SNHG3 /// SNOR  | 1,369290453  | 1,129843209  | 0,239447244 |  |
| 225073_at    | PPHLN1          | 4,78999665   | 4,550556522  | 0,239440127 |  |
| 1557673_at   | -               | -0,67289328  | -0,912331589 | 0,239438309 |  |
| 207112_s_at  | GAB1            | -0,67289328  | -0,912331589 | 0,239438309 |  |
| 207493_x_at  | SSX2 /// SSX2B  | -0,67289328  | -0,912331589 | 0,239438309 |  |
| 216119_s_at  | SPEF1           | -0,67289328  | -0,912331589 | 0,239438309 |  |
| 224371_at    | ADAMTSL1        | -0,67289328  | -0,912331589 | 0,239438309 |  |
| 226034_at    | DUSP4           | -0,67289328  | -0,912331589 | 0,239438309 |  |
| 229047_at    | PLEKHB1         | -0,67289328  | -0,912331589 | 0,239438309 |  |
| 230822_at    | TMEM61          | -0,67289328  | -0,912331589 | 0,239438309 |  |
| 240996_at    | -               | -0,67289328  | -0,912331589 | 0,239438309 |  |
| 243083_at    | LOC100287704 /  | -0,67289328  | -0,912331589 | 0,239438309 |  |
| 244514_at    | -               | -0,67289328  | -0,912331589 | 0,239438309 |  |
| 244604_at    | -               | -0,67289328  | -0,912331589 | 0,239438309 |  |
| 211792_s_at  | CDKN2C          | 0,82905153   | 0,589657387  | 0,239394143 |  |
| 1555746_at   | CD79B           | -1,424023738 | -1,663414495 | 0,239390756 |  |
| 1556110_at   | -               | -1,424023738 | -1,663414495 | 0,239390756 |  |
| 1559405_a_at | TRPV6           | -1,424023738 | -1,663414495 | 0,239390756 |  |
| 1559485_at   | ATG2B           | -1,424023738 | -1,663414495 | 0,239390756 |  |
| 1564338_at   | -               | -1,424023738 | -1,663414495 | 0,239390756 |  |
| 207045_at    | CCDC132         | -1,424023738 | -1,663414495 | 0,239390756 |  |
| 208570_at    | WNT1            | -1,424023738 | -1,663414495 | 0,239390756 |  |
| 214091_s_at  | GPX3            | -1,424023738 | -1,663414495 | 0,239390756 |  |
| 217327_at    | -               | -1,424023738 | -1,663414495 | 0,239390756 |  |
| 217581_at    | -               | -1,424023738 | -1,663414495 | 0,239390756 |  |

|              |                             |              |              |             |  |
|--------------|-----------------------------|--------------|--------------|-------------|--|
| 225293_at    | COL27A1                     | -1,424023738 | -1,663414495 | 0,239390756 |  |
| 231092_s_at  | -                           | -1,424023738 | -1,663414495 | 0,239390756 |  |
| 231458_at    | LOC100507629                | -1,424023738 | -1,663414495 | 0,239390756 |  |
| 234393_at    | HDAC9                       | -1,424023738 | -1,663414495 | 0,239390756 |  |
| 236456_at    | PTPN5                       | -1,424023738 | -1,663414495 | 0,239390756 |  |
| 239398_at    | KLHL31                      | -1,424023738 | -1,663414495 | 0,239390756 |  |
| 243380_at    | -                           | -1,424023738 | -1,663414495 | 0,239390756 |  |
| 244699_at    | AHI1                        | -1,424023738 | -1,663414495 | 0,239390756 |  |
| 1558540_s_at | SLC2A11                     | 0,592200562  | 0,352836757  | 0,239363804 |  |
| 229360_at    | ZNF280B                     | 0,592200562  | 0,352836757  | 0,239363804 |  |
| 213012_at    | NEDD4                       | 1,485482016  | 1,246149888  | 0,239332127 |  |
| 225092_at    | RABEP1                      | 2,994644467  | 2,755336312  | 0,239308156 |  |
| 226568_at    | FAM102B                     | 4,076291169  | 3,837157105  | 0,239134064 |  |
| 203884_s_at  | RAB11FIP2                   | 1,143956113  | 0,904843258  | 0,239112855 |  |
| 223186_at    | TMEM189 /// TMEM189         | 3,663333942  | 3,424287521  | 0,239046421 |  |
| 242881_x_at  | LOC100506303 / LOC100506303 | 2,842156496  | 2,603119255  | 0,239037241 |  |
| 215781_s_at  | TOP3B                       | 0,246434561  | 0,007421914  | 0,239012647 |  |
| 224669_at    | SYS1                        | 1,85379461   | 1,614891062  | 0,238903548 |  |
| 209473_at    | ENTPD1                      | 0,695652136  | 0,456918297  | 0,238733839 |  |
| 203576_at    | BCAT2                       | 2,671625168  | 2,432926755  | 0,238698413 |  |
| 214173_x_at  | URI1                        | 6,6397013    | 6,401025631  | 0,238675669 |  |
| 238010_at    | C1orf174                    | 2,250242994  | 2,011838132  | 0,238404862 |  |
| 204120_s_at  | ADK                         | 1,940595304  | 1,702196344  | 0,23839896  |  |
| 200769_s_at  | MAT2A                       | 3,086335384  | 2,848075314  | 0,23826007  |  |
| 233970_s_at  | TRMT6                       | 4,230671025  | 3,992437318  | 0,238233706 |  |
| 213642_at    | -                           | 2,218170265  | 1,979940779  | 0,238229486 |  |
| 210620_s_at  | GTF3C2                      | 0,792179257  | 0,553993624  | 0,238185633 |  |
| 231938_at    | SGOL1                       | 0,962260738  | 0,724100169  | 0,238160569 |  |
| 228234_at    | TICAM2 /// TMEM106          | 1,251994932  | 1,013870809  | 0,238124123 |  |
| 228752_at    | EFCAB4B                     | 2,236584753  | 1,998633167  | 0,237951585 |  |
| 217601_at    | NUP188                      | 0,317354302  | 0,079428135  | 0,237926167 |  |
| 220260_at    | TBC1D19                     | 0,317354302  | 0,079428135  | 0,237926167 |  |
| 221410_x_at  | PCDHB3                      | 0,317354302  | 0,079428135  | 0,237926167 |  |
| 239662_x_at  | TMCC1                       | 0,317354302  | 0,079428135  | 0,237926167 |  |
| 206057_x_at  | SPN                         | 2,348755185  | 2,110887591  | 0,237867594 |  |
| 219354_at    | KLHL26                      | 1,318332599  | 1,080561626  | 0,237770973 |  |
| 235919_at    | CEP78                       | 1,318332599  | 1,080561626  | 0,237770973 |  |
| 235476_at    | TRIM59                      | 2,043538949  | 1,805902329  | 0,23763662  |  |
| 244779_at    | ZDHHC2                      | 1,965648824  | 1,728030156  | 0,237618668 |  |
| 37796_at     | LRCH4 /// SAP25             | 3,183858216  | 2,946258252  | 0,237599964 |  |
| 213223_at    | RPL28                       | 2,666540916  | 2,428994491  | 0,237546426 |  |
| 216274_s_at  | SEC11A                      | 5,60687584   | 5,369349853  | 0,237525988 |  |
| 229798_s_at  | BRI3                        | 1,496984567  | 1,259496994  | 0,237487573 |  |
| 209660_at    | TTR                         | 0,841135803  | 0,603679647  | 0,237456156 |  |
| 211453_s_at  | AKT2                        | 0,841135803  | 0,603679647  | 0,237456156 |  |
| 228881_at    | -                           | 0,841135803  | 0,603679647  | 0,237456156 |  |
| 228997_at    | TRNAU1AP                    | 1,774096855  | 1,536652708  | 0,237444147 |  |
| 214665_s_at  | CHP1                        | 5,828864595  | 5,591420757  | 0,237443838 |  |
| 1553929_at   | ACER1                       | -1,026571149 | -1,264005341 | 0,237434192 |  |
| 1555305_at   | FOXJ2                       | -1,026571149 | -1,264005341 | 0,237434192 |  |
| 1556092_s_at | HEMK1                       | -1,026571149 | -1,264005341 | 0,237434192 |  |
| 1562056_at   | -                           | -1,026571149 | -1,264005341 | 0,237434192 |  |
| 205627_at    | CDA                         | -1,026571149 | -1,264005341 | 0,237434192 |  |
| 207140_at    | ALPI                        | -1,026571149 | -1,264005341 | 0,237434192 |  |
| 208102_s_at  | PSD                         | -1,026571149 | -1,264005341 | 0,237434192 |  |
| 211739_x_at  | CSH1                        | -1,026571149 | -1,264005341 | 0,237434192 |  |



|              |                 |              |              |             |  |
|--------------|-----------------|--------------|--------------|-------------|--|
| 213544_at    | ING2            | -1,026571149 | -1,264005341 | 0,237434192 |  |
| 217875_s_at  | PMEPA1          | -1,026571149 | -1,264005341 | 0,237434192 |  |
| 226417_at    | RHOB            | -1,026571149 | -1,264005341 | 0,237434192 |  |
| 239208_s_at  | YBEY            | 2,819431021  | 2,582026171  | 0,237404849 |  |
| 224963_at    | SLC26A2         | 2,320980353  | 2,083632167  | 0,237348186 |  |
| 220399_at    | LINC00115       | 0,44160593   | 0,204310755  | 0,237295174 |  |
| 229071_at    | C17orf100       | 0,44160593   | 0,204310755  | 0,237295174 |  |
| 1554762_a_at | CLDN22 /// WW   | 1,352503698  | 1,115234684  | 0,237269014 |  |
| 226801_s_at  | AIDA            | 4,961705304  | 4,724458736  | 0,237246568 |  |
| 214794_at    | PA2G4           | 3,729025365  | 3,491815843  | 0,237209521 |  |
| 202690_s_at  | SNRPD1          | 6,133171888  | 5,895970644  | 0,237201244 |  |
| 224731_at    | HMGB1           | 6,54371912   | 6,306604776  | 0,237114344 |  |
| 204854_at    | LEPREL2         | -0,299034815 | -0,536087151 | 0,237052336 |  |
| 206387_at    | CDX2            | -0,299034815 | -0,536087151 | 0,237052336 |  |
| 215799_at    | -               | -0,299034815 | -0,536087151 | 0,237052336 |  |
| 216299_s_at  | XRCC3           | -0,299034815 | -0,536087151 | 0,237052336 |  |
| 231637_at    | LOC100499194    | -0,299034815 | -0,536087151 | 0,237052336 |  |
| 234729_at    | PHKG1           | -0,299034815 | -0,536087151 | 0,237052336 |  |
| 238739_at    | IPMK            | -0,299034815 | -0,536087151 | 0,237052336 |  |
| 1567107_s_at | TPM4            | 3,902669169  | 3,665633845  | 0,237035324 |  |
| 219455_at    | C7orf63         | 0,928678725  | 0,691645685  | 0,237033039 |  |
| 207545_s_at  | NUMB            | 1,607231019  | 1,370274469  | 0,23695655  |  |
| 213549_at    | PDZD8           | 4,814719631  | 4,577894064  | 0,236825567 |  |
| 203713_s_at  | LLGL2           | -0,112808516 | -0,34958478  | 0,236776264 |  |
| 216264_s_at  | LAMB2           | -0,112808516 | -0,34958478  | 0,236776264 |  |
| 233396_s_at  | CSRP2BP         | -0,112808516 | -0,34958478  | 0,236776264 |  |
| 240359_at    | BPIFA3          | -0,112808516 | -0,34958478  | 0,236776264 |  |
| 202904_s_at  | LSM5            | 2,582657321  | 2,345926937  | 0,236730384 |  |
| 218499_at    | MST4            | 6,656467298  | 6,419784819  | 0,236682479 |  |
| 1552666_a_at | LRRC7           | -2,384869671 | -2,621331989 | 0,236462318 |  |
| 1553420_at   | SATB2-AS1       | -2,384869671 | -2,621331989 | 0,236462318 |  |
| 1555520_at   | PTCH1           | -2,384869671 | -2,621331989 | 0,236462318 |  |
| 1556221_a_at | -               | -2,384869671 | -2,621331989 | 0,236462318 |  |
| 1556259_at   | -               | -2,384869671 | -2,621331989 | 0,236462318 |  |
| 1560819_a_at | LOC387895       | -2,384869671 | -2,621331989 | 0,236462318 |  |
| 1561003_at   | -               | -2,384869671 | -2,621331989 | 0,236462318 |  |
| 1561462_at   | -               | -2,384869671 | -2,621331989 | 0,236462318 |  |
| 1567078_x_at | CLN6            | -2,384869671 | -2,621331989 | 0,236462318 |  |
| 1570596_at   | -               | -2,384869671 | -2,621331989 | 0,236462318 |  |
| 201427_s_at  | SEPP1           | -2,384869671 | -2,621331989 | 0,236462318 |  |
| 213120_at    | UHRF1BP1L       | -2,384869671 | -2,621331989 | 0,236462318 |  |
| 214029_at    | SLC25A42        | -2,384869671 | -2,621331989 | 0,236462318 |  |
| 216805_at    | -               | -2,384869671 | -2,621331989 | 0,236462318 |  |
| 220144_s_at  | ANKRD5          | -2,384869671 | -2,621331989 | 0,236462318 |  |
| 220415_at    | FPGT-TNNI3K /// | -2,384869671 | -2,621331989 | 0,236462318 |  |
| 237955_at    | C5orf58         | -2,384869671 | -2,621331989 | 0,236462318 |  |
| 239330_at    | DCAF12L2        | -2,384869671 | -2,621331989 | 0,236462318 |  |
| 239726_at    | ANK3            | -2,384869671 | -2,621331989 | 0,236462318 |  |
| 240465_at    | C4orf32         | -2,384869671 | -2,621331989 | 0,236462318 |  |
| 241311_at    | -               | -2,384869671 | -2,621331989 | 0,236462318 |  |
| 243359_at    | -               | -2,384869671 | -2,621331989 | 0,236462318 |  |
| 211711_s_at  | PTEN            | 2,433006244  | 2,196649505  | 0,23635674  |  |
| 212645_x_at  | BRE             | 2,462640593  | 2,226407528  | 0,236233065 |  |
| 227446_s_at  | DHRS4-AS1       | 1,58584542   | 1,349621332  | 0,236224088 |  |
| 218311_at    | MAP4K3          | 1,390002893  | 1,153866761  | 0,236136132 |  |
| 227787_s_at  | MED30           | 4,293033569  | 4,056921713  | 0,236111855 |  |

|              |                |              |              |             |  |
|--------------|----------------|--------------|--------------|-------------|--|
| 228834_at    | -              | 1,05337236   | 0,817300337  | 0,236072023 |  |
| 1562086_at   | -              | -3,07502285  | -3,311072652 | 0,236049802 |  |
| 1567359_at   | BDNF-AS        | -3,07502285  | -3,311072652 | 0,236049802 |  |
| 234755_x_at  | -              | -3,07502285  | -3,311072652 | 0,236049802 |  |
| 235503_at    | ASB5           | -3,07502285  | -3,311072652 | 0,236049802 |  |
| 237243_at    | -              | -3,07502285  | -3,311072652 | 0,236049802 |  |
| 240717_at    | ABCB5          | -3,07502285  | -3,311072652 | 0,236049802 |  |
| 244720_at    | -              | -3,07502285  | -3,311072652 | 0,236049802 |  |
| 227766_at    | LIG4           | 1,995690482  | 1,759685182  | 0,236005301 |  |
| 220990_s_at  | MIR21 /// VMP1 | 4,580712136  | 4,344716207  | 0,235995929 |  |
| 205492_s_at  | DPYSL4         | 0,613492853  | 0,377530647  | 0,235962206 |  |
| 230363_s_at  | INPP5F         | 0,613492853  | 0,377530647  | 0,235962206 |  |
| 236106_at    | -              | 0,613492853  | 0,377530647  | 0,235962206 |  |
| 225591_at    | FBXO25         | 2,861566439  | 2,625627364  | 0,235939076 |  |
| 213838_at    | NOL7           | 3,620156261  | 3,384231608  | 0,235924653 |  |
| 52940_at     | SIGIRR         | 1,091809093  | 0,855889476  | 0,235919617 |  |
| 1561847_at   | NUDT17         | -0,022466681 | -0,258114234 | 0,235647553 |  |
| 222075_s_at  | OAZ3           | -0,022466681 | -0,258114234 | 0,235647553 |  |
| 224096_at    | MIR4755        | -0,022466681 | -0,258114234 | 0,235647553 |  |
| 212306_at    | CLASP2         | 3,890364806  | 3,654731437  | 0,235633368 |  |
| 224314_s_at  | EGLN1          | 0,715481152  | 0,479907041  | 0,235574111 |  |
| 232184_at    | ALS2           | 0,715481152  | 0,479907041  | 0,235574111 |  |
| 225634_at    | ZC3HAV1        | 4,268075451  | 4,032509762  | 0,235565689 |  |
| 1569895_at   | LOC100133612   | 1,481627361  | 1,246149888  | 0,235477473 |  |
| 208351_s_at  | MAPK1          | 1,716223609  | 1,480766833  | 0,235456776 |  |
| 213225_at    | PPM1B          | 3,076146581  | 2,840694075  | 0,235452506 |  |
| 39966_at     | CSPG5          | 2,667389537  | 2,431944693  | 0,235444844 |  |
| 224689_at    | MANBAL         | 2,886560922  | 2,651169275  | 0,235391646 |  |
| 208780_x_at  | VAPA           | 6,552128825  | 6,316881876  | 0,235246949 |  |
| 219648_at    | MREG           | 2,990581579  | 2,755336312  | 0,235245268 |  |
| 208262_x_at  | MEFV           | 0,133056859  | -0,102100538 | 0,235157396 |  |
| 230652_at    | ARAF           | 0,133056859  | -0,102100538 | 0,235157396 |  |
| 242092_at    | EPB41L2        | 0,133056859  | -0,102100538 | 0,235157396 |  |
| 213024_at    | TMF1           | 2,001086023  | 1,765933685  | 0,235152338 |  |
| 217738_at    | NAMPT          | 3,107750584  | 2,87289275   | 0,234857834 |  |
| 228578_at    | RBM45          | 2,846658948  | 2,611817827  | 0,234841121 |  |
| 203310_at    | STXBP3         | 3,91129185   | 3,67645448   | 0,23483737  |  |
| 244650_at    | FAM105A        | 0,457392764  | 0,222599095  | 0,23479367  |  |
| 225475_at    | MIER1          | 2,890927111  | 2,656223838  | 0,234703272 |  |
| 205552_s_at  | OAS1           | 0,859074518  | 0,624460759  | 0,234613759 |  |
| 213035_at    | ANKRD28        | 2,837639949  | 2,603119255  | 0,234520694 |  |
| 224057_s_at  | THAP4          | 2,837639949  | 2,603119255  | 0,234520694 |  |
| 212698_s_at  | 40422          | 3,225364068  | 2,990953566  | 0,234410502 |  |
| 233568_x_at  | CWF19L1        | 3,234554895  | 3,000258961  | 0,234295934 |  |
| 205271_s_at  | CDK20          | 1,139070151  | 0,904843258  | 0,234226892 |  |
| 1558733_at   | ZBTB38         | 0,209623097  | -0,024572586 | 0,234195684 |  |
| 229895_s_at  | NCK1           | 0,209623097  | -0,024572586 | 0,234195684 |  |
| 209113_s_at  | HMG20B         | 1,841816345  | 1,60795124   | 0,233865105 |  |
| 204482_at    | CLDN5          | -0,986356909 | -1,220210588 | 0,233853679 |  |
| 218874_s_at  | ATAT1          | -0,986356909 | -1,220210588 | 0,233853679 |  |
| 220663_at    | IL1RAPL1       | -0,986356909 | -1,220210588 | 0,233853679 |  |
| 231191_at    | -              | -0,986356909 | -1,220210588 | 0,233853679 |  |
| 238921_at    | LOC644794      | -0,986356909 | -1,220210588 | 0,233853679 |  |
| 240916_x_at  | -              | -0,986356909 | -1,220210588 | 0,233853679 |  |
| 1555775_a_at | ZAR1           | -0,496991414 | -0,730778808 | 0,233787394 |  |
| 212736_at    | C16orf45       | -0,496991414 | -0,730778808 | 0,233787394 |  |

|              |               |              |              |             |  |
|--------------|---------------|--------------|--------------|-------------|--|
| 222215_at    | SLC38A7       | -0,496991414 | -0,730778808 | 0,233787394 |  |
| 232718_at    | LINC00589     | -0,496991414 | -0,730778808 | 0,233787394 |  |
| 238867_at    | TMEM182       | -0,496991414 | -0,730778808 | 0,233787394 |  |
| 239107_at    | ZNF280D       | -0,496991414 | -0,730778808 | 0,233787394 |  |
| 239651_at    | ANAPC5        | -0,496991414 | -0,730778808 | 0,233787394 |  |
| 220079_s_at  | USP48         | 4,229522279  | 3,995764148  | 0,23375813  |  |
| 205897_at    | NFATC4        | 0,627515113  | 0,393761504  | 0,233753609 |  |
| 1556553_at   | -             | -1,308181863 | -1,541908042 | 0,233726179 |  |
| 1557780_at   | -             | -1,308181863 | -1,541908042 | 0,233726179 |  |
| 1559375_s_at | -             | -1,308181863 | -1,541908042 | 0,233726179 |  |
| 210632_s_at  | SGCA          | -1,308181863 | -1,541908042 | 0,233726179 |  |
| 212912_at    | RPS6KA2       | -1,308181863 | -1,541908042 | 0,233726179 |  |
| 215517_at    | PYGO1         | -1,308181863 | -1,541908042 | 0,233726179 |  |
| 216358_at    | -             | -1,308181863 | -1,541908042 | 0,233726179 |  |
| 219843_at    | IPP           | -1,308181863 | -1,541908042 | 0,233726179 |  |
| 230269_at    | -             | -1,308181863 | -1,541908042 | 0,233726179 |  |
| 231241_at    | -             | -1,308181863 | -1,541908042 | 0,233726179 |  |
| 231814_at    | MUC12         | -1,308181863 | -1,541908042 | 0,233726179 |  |
| 236334_at    | -             | -1,308181863 | -1,541908042 | 0,233726179 |  |
| 241658_at    | -             | -1,308181863 | -1,541908042 | 0,233726179 |  |
| 242973_at    | CACNA1C       | -1,308181863 | -1,541908042 | 0,233726179 |  |
| 223320_s_at  | ABCB10        | 2,970093718  | 2,7363693    | 0,233724418 |  |
| 229828_at    | CDC73         | 1,247462054  | 1,013870809  | 0,233591245 |  |
| 201861_s_at  | LRRFIP1       | 3,032022986  | 2,798646381  | 0,233376605 |  |
| 206028_s_at  | MERTK         | 2,232003119  | 1,998633167  | 0,233369952 |  |
| 206037_at    | CCBL1         | 0,822971223  | 0,589657387  | 0,233313836 |  |
| 203119_at    | CCDC86        | 3,834791978  | 3,601570866  | 0,233221112 |  |
| 202344_at    | HSF1          | 1,823660386  | 1,590454215  | 0,233206171 |  |
| 219957_at    | RUFY2         | -0,089689931 | -0,322870281 | 0,23318035  |  |
| 223468_s_at  | RGMA          | -0,089689931 | -0,322870281 | 0,23318035  |  |
| 224010_at    | ANAPC11       | -0,089689931 | -0,322870281 | 0,23318035  |  |
| 229102_at    | HTATIP2       | -0,089689931 | -0,322870281 | 0,23318035  |  |
| 44673_at     | SIGLEC1       | 0,181384989  | -0,051772821 | 0,233157809 |  |
| 202204_s_at  | AMFR          | 1,631786706  | 1,398700978  | 0,233085728 |  |
| 211863_x_at  | HFE           | 0,072842263  | -0,160136748 | 0,232979011 |  |
| 213723_s_at  | IDUA          | 0,072842263  | -0,160136748 | 0,232979011 |  |
| 215467_x_at  | LOC647070     | 0,072842263  | -0,160136748 | 0,232979011 |  |
| 221754_s_at  | CORO1B        | 0,072842263  | -0,160136748 | 0,232979011 |  |
| 226234_at    | GDF11         | 0,072842263  | -0,160136748 | 0,232979011 |  |
| 224747_at    | UBE2Q2        | 3,858765357  | 3,625821706  | 0,232943651 |  |
| 1554504_at   | NAALAD2       | -3,114791413 | -3,347710726 | 0,232919313 |  |
| 201299_s_at  | MOB1A         | 1,732533761  | 1,499637023  | 0,232896739 |  |
| 1560047_s_at | -             | -0,622910612 | -0,855751026 | 0,232840414 |  |
| 1561386_at   | -             | -0,622910612 | -0,855751026 | 0,232840414 |  |
| 1566001_at   | -             | -0,622910612 | -0,855751026 | 0,232840414 |  |
| 206637_at    | P2RY14        | -0,622910612 | -0,855751026 | 0,232840414 |  |
| 209839_at    | DNM3          | -0,622910612 | -0,855751026 | 0,232840414 |  |
| 211644_x_at  | IGK@ /// IGKC | -0,622910612 | -0,855751026 | 0,232840414 |  |
| 221446_at    | ADAM30        | -0,622910612 | -0,855751026 | 0,232840414 |  |
| 233489_at    | TMEM43        | -0,622910612 | -0,855751026 | 0,232840414 |  |
| 237759_at    | CD48          | -0,622910612 | -0,855751026 | 0,232840414 |  |
| 239949_at    | THNSL2        | -0,622910612 | -0,855751026 | 0,232840414 |  |
| 240813_at    | -             | -0,622910612 | -0,855751026 | 0,232840414 |  |
| 242674_at    | EIF4E         | -0,622910612 | -0,855751026 | 0,232840414 |  |
| 243760_at    | MIPEPP3       | -0,622910612 | -0,855751026 | 0,232840414 |  |
| 221654_s_at  | USP3          | 3,294008537  | 3,061230246  | 0,232778291 |  |

|              |           |              |              |             |  |
|--------------|-----------|--------------|--------------|-------------|--|
| 220753_s_at  | CRYL1     | 0,87091093   | 0,638150376  | 0,232760554 |  |
| 227811_at    | FGD3      | 0,87091093   | 0,638150376  | 0,232760554 |  |
| 207168_s_at  | H2AFY     | 5,465225326  | 5,232507246  | 0,23271808  |  |
| 201573_s_at  | ETF1      | 4,984696817  | 4,752066034  | 0,232630782 |  |
| 232645_at    | LOC153684 | 0,95671774   | 0,724100169  | 0,232617571 |  |
| 1552564_at   | NUDT9P1   | -2,866296344 | -3,098858316 | 0,232561972 |  |
| 1552735_at   | PCDHGA4   | -2,866296344 | -3,098858316 | 0,232561972 |  |
| 1557431_at   | -         | -2,866296344 | -3,098858316 | 0,232561972 |  |
| 1557703_at   | 07.03.15  | -2,866296344 | -3,098858316 | 0,232561972 |  |
| 1568366_at   | -         | -2,866296344 | -3,098858316 | 0,232561972 |  |
| 229802_at    | WISP1     | -2,866296344 | -3,098858316 | 0,232561972 |  |
| 235591_at    | SSTR1     | -2,866296344 | -3,098858316 | 0,232561972 |  |
| 236037_at    | KIAA1244  | -2,866296344 | -3,098858316 | 0,232561972 |  |
| 239150_at    | SNTN      | -2,866296344 | -3,098858316 | 0,232561972 |  |
| 218663_at    | NCAPG     | 3,18563636   | 2,953119918  | 0,232516442 |  |
| 236265_at    | SP4       | 2,782308844  | 2,549796788  | 0,232512056 |  |
| 212944_at    | SLC5A3    | 4,635514003  | 4,403009191  | 0,232504812 |  |
| 212233_at    | MAP1B     | 3,008105382  | 2,775606361  | 0,232499022 |  |
| 238828_at    | KIAA1919  | 1,037706275  | 0,805216064  | 0,232490211 |  |
| 240058_at    | -         | 1,037706275  | 0,805216064  | 0,232490211 |  |
| 223191_at    | COX16     | 5,492057836  | 5,25960603   | 0,232451807 |  |
| 228567_at    | MIR4720   | 1,556829052  | 1,324440845  | 0,232388206 |  |
| 224837_at    | FOXP1     | 2,675004741  | 2,442710777  | 0,232293964 |  |
| 212139_at    | GCN1L1    | 3,933331467  | 3,701119714  | 0,232211752 |  |
| 209328_x_at  | HIGD2A    | 1,874520207  | 1,642321262  | 0,232198944 |  |
| 219361_s_at  | AEN       | 1,874520207  | 1,642321262  | 0,232198944 |  |
| 204215_at    | C7orf23   | 0,152582607  | -0,079522948 | 0,232105555 |  |
| 207645_s_at  | CHD1L     | 0,152582607  | -0,079522948 | 0,232105555 |  |
| 234062_at    | -         | 0,152582607  | -0,079522948 | 0,232105555 |  |
| 239941_at    | -         | 0,152582607  | -0,079522948 | 0,232105555 |  |
| 228642_at    | HOTAIRM1  | 1,079110292  | 0,847075464  | 0,232034828 |  |
| 200753_x_at  | SRSF2     | 4,986057923  | 4,754031948  | 0,232025974 |  |
| 207839_s_at  | TMEM8B    | 0,291166226  | 0,059218869  | 0,231947357 |  |
| 210984_x_at  | EGFR      | 0,291166226  | 0,059218869  | 0,231947357 |  |
| 229614_at    | ZNF320    | 1,446464021  | 1,214517879  | 0,231946142 |  |
| 220773_s_at  | GPHN      | 1,940595304  | 1,708698295  | 0,231897009 |  |
| 223308_s_at  | WDR5      | 3,098971025  | 2,867091644  | 0,231879381 |  |
| 229899_s_at  | ZNFX1-AS1 | 2,190100188  | 1,958277216  | 0,231822971 |  |
| 1563111_a_at | PIGX      | 2,225103271  | 1,993317152  | 0,231786119 |  |
| 236027_at    | SFR1      | 2,225103271  | 1,993317152  | 0,231786119 |  |
| 224799_at    | NDFIP2    | 3,512821151  | 3,281121096  | 0,231700056 |  |
| 225334_at    | C10orf32  | 3,512821151  | 3,281121096  | 0,231700056 |  |
| 218370_s_at  | S100PBP   | 2,491678455  | 2,259997914  | 0,231680542 |  |
| 223001_at    | OSTC      | 5,932480812  | 5,700850431  | 0,231630381 |  |
| 209676_at    | TFPI      | 2,822481847  | 2,590852465  | 0,231629382 |  |
| 218566_s_at  | CHORDC1   | 4,585658616  | 4,354078399  | 0,231580217 |  |
| 201302_at    | ANXA4     | 2,082235068  | 1,85068474   | 0,231550328 |  |
| 202601_s_at  | HTATSF1   | 1,191926657  | 0,960386719  | 0,231539937 |  |
| 213176_s_at  | LTBP4     | 1,191926657  | 0,960386719  | 0,231539937 |  |
| 200778_s_at  | 37500     | 5,14499041   | 4,913450933  | 0,231539476 |  |
| 242565_x_at  | YBEY      | 2,506929603  | 2,275409734  | 0,231519869 |  |
| 1555976_s_at | MYL12A    | 1,69307511   | 1,461646549  | 0,231428561 |  |
| 223473_at    | MPV17L2   | 3,025418883  | 2,794067719  | 0,231351164 |  |
| 1554945_x_at | VIL1      | -2,504600601 | -2,735862426 | 0,231261824 |  |
| 1555233_at   | RHOJ      | -2,504600601 | -2,735862426 | 0,231261824 |  |
| 1558757_at   | -         | -2,504600601 | -2,735862426 | 0,231261824 |  |

|              |                 |              |              |             |  |
|--------------|-----------------|--------------|--------------|-------------|--|
| 1559322_at   | LOC727916       | -2,504600601 | -2,735862426 | 0,231261824 |  |
| 1561165_a_at | DEFB108B        | -2,504600601 | -2,735862426 | 0,231261824 |  |
| 1565877_at   | -               | -2,504600601 | -2,735862426 | 0,231261824 |  |
| 1566482_at   | -               | -2,504600601 | -2,735862426 | 0,231261824 |  |
| 210755_at    | HGF             | -2,504600601 | -2,735862426 | 0,231261824 |  |
| 213355_at    | ST3GAL6         | -2,504600601 | -2,735862426 | 0,231261824 |  |
| 215300_s_at  | FMO5            | -2,504600601 | -2,735862426 | 0,231261824 |  |
| 216108_at    | -               | -2,504600601 | -2,735862426 | 0,231261824 |  |
| 221174_at    | -               | -2,504600601 | -2,735862426 | 0,231261824 |  |
| 234357_at    | -               | -2,504600601 | -2,735862426 | 0,231261824 |  |
| 234535_at    | -               | -2,504600601 | -2,735862426 | 0,231261824 |  |
| 236215_at    | -               | -2,504600601 | -2,735862426 | 0,231261824 |  |
| 237930_at    | -               | -2,504600601 | -2,735862426 | 0,231261824 |  |
| 240316_at    | C9orf57         | -2,504600601 | -2,735862426 | 0,231261824 |  |
| 215579_at    | APOBEC3G        | 0,359971644  | 0,128747141  | 0,231224503 |  |
| 222019_at    | PFDN6           | 0,359971644  | 0,128747141  | 0,231224503 |  |
| 239147_at    | ARSK            | 0,359971644  | 0,128747141  | 0,231224503 |  |
| 226386_at    | MALSU1          | 4,447740857  | 4,216563145  | 0,231177712 |  |
| 226347_at    | FUT11           | 2,802535172  | 2,571362843  | 0,231172329 |  |
| 222410_s_at  | SNX6            | 4,710299868  | 4,479143747  | 0,231156122 |  |
| 204658_at    | TRA2A           | 4,288076367  | 4,056921713  | 0,231154654 |  |
| 218723_s_at  | RGCC            | 0,480753764  | 0,249604176  | 0,231149588 |  |
| 207927_at    | HTR7            | -0,259832361 | -0,490927335 | 0,231094974 |  |
| 213108_at    | CAMK2A          | -0,259832361 | -0,490927335 | 0,231094974 |  |
| 220944_at    | PGLYRP4         | -0,259832361 | -0,490927335 | 0,231094974 |  |
| 233550_s_at  | SLC4A11         | -0,259832361 | -0,490927335 | 0,231094974 |  |
| 241922_at    | LMO4            | -0,259832361 | -0,490927335 | 0,231094974 |  |
| 235059_at    | RAB12           | 1,422536444  | 1,191491281  | 0,231045163 |  |
| 218823_s_at  | KCTD9           | 3,53158484   | 3,300620584  | 0,230964256 |  |
| 203624_at    | AKAP17A         | 3,843828743  | 3,6128809    | 0,230947844 |  |
| 231825_x_at  | ATF7IP          | 3,231115193  | 3,000258961  | 0,230856232 |  |
| 201432_at    | CAT             | 5,340953221  | 5,110146091  | 0,230807129 |  |
| 212331_at    | RBL2            | 3,188003814  | 2,957221307  | 0,230782507 |  |
| 203473_at    | SLCO2B1         | 1,567778694  | 1,337086025  | 0,230692669 |  |
| 225661_at    | IFNAR1          | 3,266269388  | 3,035599287  | 0,2306701   |  |
| 217673_x_at  | GNAS            | 4,489366635  | 4,258712848  | 0,230653788 |  |
| 203986_at    | FAM47E /// FAM4 | 0,541261317  | 0,310717132  | 0,230544185 |  |
| 220292_at    | ZNF434          | 0,541261317  | 0,310717132  | 0,230544185 |  |
| 241416_at    | -               | 0,541261317  | 0,310717132  | 0,230544185 |  |
| 1557480_a_at | PPP1R27         | 0,747935635  | 0,51742585   | 0,230509785 |  |
| 212390_at    | LOC728802 /// P | 0,747935635  | 0,51742585   | 0,230509785 |  |
| 225915_at    | CAB39L          | 0,747935635  | 0,51742585   | 0,230509785 |  |
| 226184_at    | FMNL2           | 1,163336153  | 0,932882274  | 0,230453879 |  |
| 217403_s_at  | ZNF227          | 1,699726954  | 1,469325098  | 0,230401856 |  |
| 235579_at    | SCAF11          | 2,456762221  | 2,226407528  | 0,230354693 |  |
| 225841_at    | HENMT1          | 3,731461974  | 3,501209806  | 0,230252168 |  |
| 202239_at    | PARP4           | 2,876321464  | 2,646096941  | 0,230224523 |  |
| 226585_at    | NEIL2           | 1,774096855  | 1,543943227  | 0,230153628 |  |
| 200978_at    | MDH1            | 5,487980577  | 5,257944504  | 0,230036073 |  |
| 211255_x_at  | DEDD            | 0,798390451  | 0,568365095  | 0,230025356 |  |
| 221586_s_at  | E2F5            | 3,488057722  | 3,258033502  | 0,23002422  |  |
| 233632_s_at  | XRN1            | 2,288253583  | 2,058399602  | 0,229853981 |  |
| 1559722_at   | -               | -2,908843709 | -3,138626879 | 0,22978317  |  |
| 1563101_at   | ARNTL2          | -2,908843709 | -3,138626879 | 0,22978317  |  |
| 1569411_at   | TMEM67          | -2,908843709 | -3,138626879 | 0,22978317  |  |
| 210941_at    | PCDH7           | -2,908843709 | -3,138626879 | 0,22978317  |  |

|              |           |              |              |             |  |
|--------------|-----------|--------------|--------------|-------------|--|
| 214823_at    | ZNF204P   | -2,908843709 | -3,138626879 | 0,22978317  |  |
| 219948_x_at  | UGT2A3    | -2,908843709 | -3,138626879 | 0,22978317  |  |
| 229598_at    | COBL1     | -2,908843709 | -3,138626879 | 0,22978317  |  |
| 231063_at    | -         | -2,908843709 | -3,138626879 | 0,22978317  |  |
| 234296_s_at  | TEX11     | -2,908843709 | -3,138626879 | 0,22978317  |  |
| 237602_at    | -         | -2,908843709 | -3,138626879 | 0,22978317  |  |
| 237831_x_at  | MMAA      | -2,908843709 | -3,138626879 | 0,22978317  |  |
| 241871_at    | CAMK4     | -2,908843709 | -3,138626879 | 0,22978317  |  |
| 218304_s_at  | OSBPL11   | 2,81177561   | 2,582026171  | 0,229749439 |  |
| 209272_at    | NAB1      | 3,431234921  | 3,201528602  | 0,229706319 |  |
| 222252_x_at  | UBQLN4    | 1,094335495  | 0,864649967  | 0,229685528 |  |
| 220250_at    | ZNF286A   | 0,934330293  | 0,704715219  | 0,229615074 |  |
| 239069_s_at  | -         | 4,046594062  | 3,816987307  | 0,229606754 |  |
| 203978_at    | NUBP1     | 2,693452197  | 2,464004877  | 0,22944732  |  |
| 228297_at    | -         | 2,987866617  | 2,758473378  | 0,229393239 |  |
| 220011_at    | C1orf135  | 2,779171778  | 2,549796788  | 0,22937499  |  |
| 214141_x_at  | SRSF7     | 6,247747786  | 6,01846      | 0,229287786 |  |
| 231338_at    | C15orf55  | 0,30867765   | 0,079428135  | 0,229249515 |  |
| 209076_s_at  | WDR45L    | 4,19815525   | 3,968932193  | 0,229223057 |  |
| 201096_s_at  | ARF4      | 5,647869371  | 5,418765728  | 0,229103643 |  |
| 202097_at    | NUP153    | 5,483409962  | 5,254337955  | 0,229072007 |  |
| 1554663_a_at | NUMA1     | -2,551294263 | -2,780313924 | 0,229019662 |  |
| 1560012_at   | -         | -2,551294263 | -2,780313924 | 0,229019662 |  |
| 1560643_x_at | -         | -2,551294263 | -2,780313924 | 0,229019662 |  |
| 1562901_at   | LOC400456 | -2,551294263 | -2,780313924 | 0,229019662 |  |
| 1565900_at   | METTL15   | -2,551294263 | -2,780313924 | 0,229019662 |  |
| 1566295_at   | -         | -2,551294263 | -2,780313924 | 0,229019662 |  |
| 1566955_at   | -         | -2,551294263 | -2,780313924 | 0,229019662 |  |
| 1569006_at   | LOC284379 | -2,551294263 | -2,780313924 | 0,229019662 |  |
| 1569570_at   | AGBL4     | -2,551294263 | -2,780313924 | 0,229019662 |  |
| 216369_at    | -         | -2,551294263 | -2,780313924 | 0,229019662 |  |
| 233231_at    | -         | -2,551294263 | -2,780313924 | 0,229019662 |  |
| 234606_at    | -         | -2,551294263 | -2,780313924 | 0,229019662 |  |
| 234662_at    | RAD21L1   | -2,551294263 | -2,780313924 | 0,229019662 |  |
| 235185_s_at  | LOC388692 | -2,551294263 | -2,780313924 | 0,229019662 |  |
| 237169_at    | TNC       | -2,551294263 | -2,780313924 | 0,229019662 |  |
| 237218_at    | -         | -2,551294263 | -2,780313924 | 0,229019662 |  |
| 238127_at    | GAS6-AS1  | -2,551294263 | -2,780313924 | 0,229019662 |  |
| 238552_at    | -         | -2,551294263 | -2,780313924 | 0,229019662 |  |
| 240152_at    | -         | -2,551294263 | -2,780313924 | 0,229019662 |  |
| 240739_at    | -         | -2,551294263 | -2,780313924 | 0,229019662 |  |
| 241356_at    | -         | -2,551294263 | -2,780313924 | 0,229019662 |  |
| 242018_at    | -         | -2,551294263 | -2,780313924 | 0,229019662 |  |
| 244098_at    | -         | -2,551294263 | -2,780313924 | 0,229019662 |  |
| 202850_at    | ABCD3     | 4,010933848  | 3,781960839  | 0,228973009 |  |
| 210361_s_at  | ELF2      | 1,46610492   | 1,23718272   | 0,228922201 |  |
| 227386_s_at  | TMEM200B  | 0,606430281  | 0,377530647  | 0,228899635 |  |
| 227464_at    | ACSF3     | 0,606430281  | 0,377530647  | 0,228899635 |  |
| 244115_at    | FAM126A   | 0,606430281  | 0,377530647  | 0,228899635 |  |
| 227833_s_at  | MBD6      | 1,406361373  | 1,177496821  | 0,228864552 |  |
| 235507_at    | PCMTD1    | 0,496120222  | 0,26733076   | 0,228789462 |  |
| 200687_s_at  | SF3B3     | 4,324039713  | 4,09526554   | 0,228774173 |  |
| 210508_s_at  | KCNQ2     | -0,59053611  | -0,819238336 | 0,228702226 |  |
| 216856_s_at  | -         | -0,59053611  | -0,819238336 | 0,228702226 |  |
| 222074_at    | UROD      | -0,59053611  | -0,819238336 | 0,228702226 |  |
| 224263_x_at  | ZAN       | -0,59053611  | -0,819238336 | 0,228702226 |  |

|              |              |              |              |             |  |
|--------------|--------------|--------------|--------------|-------------|--|
| 225233_at    | MSI2         | -0,59053611  | -0,819238336 | 0,228702226 |  |
| 238285_at    | SOX5         | -0,59053611  | -0,819238336 | 0,228702226 |  |
| 241636_x_at  | -            | -0,59053611  | -0,819238336 | 0,228702226 |  |
| 243843_at    | N4BP2L1      | -0,59053611  | -0,819238336 | 0,228702226 |  |
| 244843_x_at  | -            | -0,59053611  | -0,819238336 | 0,228702226 |  |
| 223467_at    | RASD1        | 0,853119696  | 0,624460759  | 0,228658937 |  |
| 220950_s_at  | KANSL3       | 0,760715727  | 0,532164371  | 0,228551356 |  |
| 1555470_a_at | PPM1F        | 1,063722698  | 0,835239052  | 0,228483646 |  |
| 1556543_at   | -            | 0,661985843  | 0,433557298  | 0,228428544 |  |
| 218776_s_at  | TMEM62       | 0,661985843  | 0,433557298  | 0,228428544 |  |
| 236275_at    | KRBA1        | 2,194816625  | 1,966439221  | 0,228377404 |  |
| 201160_s_at  | CSDA         | 5,657511266  | 5,429138169  | 0,228373097 |  |
| 203323_at    | CAV2         | 4,870319181  | 4,642144573  | 0,228174608 |  |
| 202787_s_at  | MAPKAPK3     | 1,283332461  | 1,055274826  | 0,228057635 |  |
| 204665_at    | SIKE1        | -0,926850548 | -1,154897679 | 0,22804713  |  |
| 215214_at    | IGLC1        | -0,926850548 | -1,154897679 | 0,22804713  |  |
| 215608_at    | -            | -0,926850548 | -1,154897679 | 0,22804713  |  |
| 216429_at    | -            | -0,926850548 | -1,154897679 | 0,22804713  |  |
| 228235_at    | MGC16121     | -0,926850548 | -1,154897679 | 0,22804713  |  |
| 231448_at    | ADAD1        | -0,926850548 | -1,154897679 | 0,22804713  |  |
| 231924_at    | LOC100506305 | -0,926850548 | -1,154897679 | 0,22804713  |  |
| 234737_at    | NT5DC3       | -0,926850548 | -1,154897679 | 0,22804713  |  |
| 235752_at    | -            | -0,926850548 | -1,154897679 | 0,22804713  |  |
| 238926_at    | LOC100505974 | -0,926850548 | -1,154897679 | 0,22804713  |  |
| 239296_at    | -            | -0,926850548 | -1,154897679 | 0,22804713  |  |
| 242907_at    | GBP2         | -0,926850548 | -1,154897679 | 0,22804713  |  |
| 204671_s_at  | ANKRD6       | 1,442503549  | 1,214517879  | 0,22798567  |  |
| 205074_at    | SLC22A5      | -0,055687482 | -0,283667828 | 0,227980346 |  |
| 211198_s_at  | ICOSLG       | -0,055687482 | -0,283667828 | 0,227980346 |  |
| 212570_at    | ENDOD1       | -0,055687482 | -0,283667828 | 0,227980346 |  |
| 237093_at    | -            | -0,055687482 | -0,283667828 | 0,227980346 |  |
| 244353_s_at  | SLC2A12      | -0,055687482 | -0,283667828 | 0,227980346 |  |
| 209746_s_at  | COQ7         | 1,58584542   | 1,3579181    | 0,22792732  |  |
| 234807_x_at  | -            | 1,58584542   | 1,3579181    | 0,22792732  |  |
| 204697_s_at  | CHGA         | 1,381753566  | 1,153866761  | 0,227886805 |  |
| 220223_at    | ATAD5        | 1,381753566  | 1,153866761  | 0,227886805 |  |
| 223053_x_at  | SSU72        | 3,722507547  | 3,49464046   | 0,227867087 |  |
| 204643_s_at  | ENOX2        | 1,318332599  | 1,090553537  | 0,227779062 |  |
| 242364_x_at  | LOC100131096 | 1,318332599  | 1,090553537  | 0,227779062 |  |
| 206793_at    | PNMT         | 1,789769151  | 1,562009954  | 0,227759197 |  |
| 1555090_x_at | TMEM182      | 0,181384709  | -0,046302147 | 0,227686856 |  |
| 207394_at    | ZNF137P      | 0,181384709  | -0,046302147 | 0,227686856 |  |
| 227636_at    | THAP5        | 2,127340679  | 1,899812471  | 0,227528208 |  |
| 210229_s_at  | CSF2         | 0,384950573  | 0,157549243  | 0,22740133  |  |
| 242490_at    | LOC100653004 | 0,384950573  | 0,157549243  | 0,22740133  |  |
| 216307_at    | DGKB         | 0,03125738   | -0,19610998  | 0,22736736  |  |
| 229439_s_at  | RBM47        | 0,03125738   | -0,19610998  | 0,22736736  |  |
| 237773_at    | -            | 0,03125738   | -0,19610998  | 0,22736736  |  |
| 1553367_a_at | COX6B2       | -0,234278768 | -0,461594427 | 0,227315659 |  |
| 209951_s_at  | MAP2K7       | -0,234278768 | -0,461594427 | 0,227315659 |  |
| 223344_s_at  | MS4A7        | -0,234278768 | -0,461594427 | 0,227315659 |  |
| 225286_at    | ARSD         | -0,234278768 | -0,461594427 | 0,227315659 |  |
| 226974_at    | NEDD4L       | -0,234278768 | -0,461594427 | 0,227315659 |  |
| 234388_at    | -            | -0,234278768 | -0,461594427 | 0,227315659 |  |
| 1554757_a_at | INPP5A       | 0,255492549  | 0,028364014  | 0,227128535 |  |
| 208040_s_at  | MYBPC3       | 0,255492549  | 0,028364014  | 0,227128535 |  |

|             |                  |              |              |             |  |
|-------------|------------------|--------------|--------------|-------------|--|
| 219082_at   | AMDHD2 /// CEM   | 0,255492549  | 0,028364014  | 0,227128535 |  |
| 221282_x_at | RUNX2            | 0,255492549  | 0,028364014  | 0,227128535 |  |
| 224179_s_at | MIOX             | 0,255492549  | 0,028364014  | 0,227128535 |  |
| 227430_at   | ZC3H10           | 0,255492549  | 0,028364014  | 0,227128535 |  |
| 229579_s_at | DISP2            | 0,255492549  | 0,028364014  | 0,227128535 |  |
| 238716_at   | LOC100506990     | 0,255492549  | 0,028364014  | 0,227128535 |  |
| 209146_at   | MSMO1            | 4,167291414  | 3,940211012  | 0,227080401 |  |
| 222369_at   | NAA40            | 2,908260915  | 2,681234383  | 0,227026532 |  |
| 1556494_at  | -                | -1,196375121 | -1,423348341 | 0,22697322  |  |
| 1568999_at  | PSG4             | -1,196375121 | -1,423348341 | 0,22697322  |  |
| 205624_at   | CPA3             | -1,196375121 | -1,423348341 | 0,22697322  |  |
| 208000_at   | GML              | -1,196375121 | -1,423348341 | 0,22697322  |  |
| 209986_at   | PAH              | -1,196375121 | -1,423348341 | 0,22697322  |  |
| 211029_x_at | FGF18            | -1,196375121 | -1,423348341 | 0,22697322  |  |
| 211129_x_at | EDA              | -1,196375121 | -1,423348341 | 0,22697322  |  |
| 224552_s_at | C11orf20 /// KCN | -1,196375121 | -1,423348341 | 0,22697322  |  |
| 227642_at   | TFCP2L1          | -1,196375121 | -1,423348341 | 0,22697322  |  |
| 230383_x_at | -                | -1,196375121 | -1,423348341 | 0,22697322  |  |
| 230601_s_at | LRRC46           | -1,196375121 | -1,423348341 | 0,22697322  |  |
| 231656_x_at | OSBPL10          | -1,196375121 | -1,423348341 | 0,22697322  |  |
| 231704_at   | CYP3A4           | -1,196375121 | -1,423348341 | 0,22697322  |  |
| 232313_at   | TMEM132C         | -1,196375121 | -1,423348341 | 0,22697322  |  |
| 233353_at   | FER1L5           | -1,196375121 | -1,423348341 | 0,22697322  |  |
| 235543_at   | -                | -1,196375121 | -1,423348341 | 0,22697322  |  |
| 236985_at   | -                | -1,196375121 | -1,423348341 | 0,22697322  |  |
| 237283_at   | -                | -1,196375121 | -1,423348341 | 0,22697322  |  |
| 208843_s_at | GORASP2          | 4,510092468  | 4,283151707  | 0,226940761 |  |
| 204012_s_at | LCMT2            | 2,864529541  | 2,637603218  | 0,226926324 |  |
| 229513_at   | STRBP            | 1,073999308  | 0,847075464  | 0,226923844 |  |
| 241721_at   | -                | 1,073999308  | 0,847075464  | 0,226923844 |  |
| 232652_x_at | SCAND1           | 3,818840142  | 3,591931093  | 0,226909048 |  |
| 227414_at   | RHBDD1           | 1,187200746  | 0,960386719  | 0,226814027 |  |
| 238496_at   | WHSC1L1          | 1,187200746  | 0,960386719  | 0,226814027 |  |
| 33579_i_at  | GALR3            | 1,187200746  | 0,960386719  | 0,226814027 |  |
| 209577_at   | PCYT2            | 0,995078803  | 0,768343791  | 0,226735012 |  |
| 220335_x_at | CES3             | 1,292162421  | 1,065442793  | 0,226719628 |  |
| 218219_s_at | LANCL2           | 2,310153708  | 2,083632167  | 0,226521541 |  |
| 222815_at   | RLIM             | 2,225103271  | 1,998633167  | 0,226470104 |  |
| 238813_at   | APEX2            | 1,912238072  | 1,685812099  | 0,226425972 |  |
| 221158_at   | GCFC1            | 2,452829957  | 2,226407528  | 0,226422429 |  |
| 219706_at   | AP5S1            | 1,596577845  | 1,370274469  | 0,226303376 |  |
| 204791_at   | NR2C1            | 2,392522438  | 2,166264721  | 0,226257716 |  |
| 201179_s_at | GNAI3            | 3,834791978  | 3,608541373  | 0,226250605 |  |
| 228515_at   | LOC90784 /// PO  | 1,751865623  | 1,525647381  | 0,226218242 |  |
| 232436_at   | ZNF274           | 1,542099044  | 1,315948728  | 0,226150316 |  |
| 1569003_at  | VMP1             | 1,394109935  | 1,16809119   | 0,226018745 |  |
| 206593_s_at | MED22            | 1,394109935  | 1,16809119   | 0,226018745 |  |
| 227967_at   | TUBGCP5          | 1,394109935  | 1,16809119   | 0,226018745 |  |
| 218319_at   | PELI1            | 1,485482016  | 1,259496994  | 0,225985021 |  |
| 225269_s_at | RBMS1            | 2,456762221  | 2,230931691  | 0,22583053  |  |
| 221335_x_at | SMG9             | 2,001086023  | 1,775255987  | 0,225830036 |  |
| 227990_at   | SLU7             | 2,001086023  | 1,775255987  | 0,225830036 |  |
| 201501_s_at | GRSF1            | 3,80887607   | 3,583111417  | 0,225764653 |  |
| 204141_at   | TUBB2A           | 6,001825317  | 5,776106355  | 0,225718962 |  |
| 214867_at   | LOC100507331     | 0,779676066  | 0,553993624  | 0,225682441 |  |
| 236972_at   | TRIM63           | 0,779676066  | 0,553993624  | 0,225682441 |  |



|              |                 |              |              |             |  |
|--------------|-----------------|--------------|--------------|-------------|--|
| 203048_s_at  | TTC37           | 2,348755185  | 2,123108223  | 0,225646962 |  |
| 202531_at    | IRF1            | 1,706348269  | 1,480766833  | 0,225581436 |  |
| 218674_at    | C5orf44         | 1,706348269  | 1,480766833  | 0,225581436 |  |
| 228171_s_at  | PLEKHG4         | 2,266015882  | 2,040470494  | 0,225545388 |  |
| 221938_x_at  | MED16           | 1,575032557  | 1,349621332  | 0,225411225 |  |
| 228967_at    | EIF1            | 0,682279745  | 0,456918297  | 0,225361448 |  |
| 237919_at    | RFFL            | 0,334552598  | 0,109221392  | 0,225331206 |  |
| 238491_at    | LOC100506161    | 0,334552598  | 0,109221392  | 0,225331206 |  |
| 242691_at    | -               | 0,334552598  | 0,109221392  | 0,225331206 |  |
| 214005_at    | GGCX            | 2,197169074  | 1,971855016  | 0,225314058 |  |
| 227255_at    | PDIK1L          | 2,084778276  | 1,859476797  | 0,22530148  |  |
| 208128_x_at  | KIF25           | 0,123193849  | -0,102100538 | 0,225294387 |  |
| 220618_s_at  | ZCWPW1          | 0,123193849  | -0,102100538 | 0,225294387 |  |
| 229998_x_at  | FAM176B         | 0,123193849  | -0,102100538 | 0,225294387 |  |
| 230065_at    | -               | 0,123193849  | -0,102100538 | 0,225294387 |  |
| 233626_at    | -               | 0,123193849  | -0,102100538 | 0,225294387 |  |
| 234991_at    | ZXDC            | 0,123193849  | -0,102100538 | 0,225294387 |  |
| 1552325_at   | CCDC11          | -3,212234735 | -3,437493426 | 0,225258691 |  |
| 1553320_s_at | CDC14C          | -3,212234735 | -3,437493426 | 0,225258691 |  |
| 1568867_x_at | -               | -3,212234735 | -3,437493426 | 0,225258691 |  |
| 226483_at    | TMEM68          | 1,603688695  | 1,378453643  | 0,225235051 |  |
| 200815_s_at  | PAFAH1B1        | 3,310399576  | 3,08516499   | 0,225234586 |  |
| 1560116_a_at | NEDD1           | 3,095191939  | 2,869995113  | 0,225196826 |  |
| 223389_s_at  | ZNF581          | 3,255587071  | 3,030417996  | 0,225169075 |  |
| 1552822_at   | TMX3            | -1,812418401 | -2,037551727 | 0,225133325 |  |
| 1557751_at   | -               | -1,812418401 | -2,037551727 | 0,225133325 |  |
| 1558262_at   | SPTY2D1-AS1     | -1,812418401 | -2,037551727 | 0,225133325 |  |
| 1559057_at   | -               | -1,812418401 | -2,037551727 | 0,225133325 |  |
| 1560432_at   | CLRN1-AS1       | -1,812418401 | -2,037551727 | 0,225133325 |  |
| 1568832_a_at | -               | -1,812418401 | -2,037551727 | 0,225133325 |  |
| 207649_at    | KRT37           | -1,812418401 | -2,037551727 | 0,225133325 |  |
| 208295_x_at  | CSHL1           | -1,812418401 | -2,037551727 | 0,225133325 |  |
| 211647_x_at  | IGHG1 /// IGHM  | -1,812418401 | -2,037551727 | 0,225133325 |  |
| 217098_s_at  | ZSCAN12         | -1,812418401 | -2,037551727 | 0,225133325 |  |
| 219388_at    | GRHL2           | -1,812418401 | -2,037551727 | 0,225133325 |  |
| 220813_at    | CYSLTR2         | -1,812418401 | -2,037551727 | 0,225133325 |  |
| 228484_s_at  | FOXO1           | -1,812418401 | -2,037551727 | 0,225133325 |  |
| 231945_at    | FILIP1          | -1,812418401 | -2,037551727 | 0,225133325 |  |
| 234848_at    | -               | -1,812418401 | -2,037551727 | 0,225133325 |  |
| 236756_at    | CENPVP1 /// CEI | -1,812418401 | -2,037551727 | 0,225133325 |  |
| 239471_at    | LRRC28          | -1,812418401 | -2,037551727 | 0,225133325 |  |
| 239685_at    | -               | -1,812418401 | -2,037551727 | 0,225133325 |  |
| 240378_at    | -               | -1,812418401 | -2,037551727 | 0,225133325 |  |
| 241008_at    | -               | -1,812418401 | -2,037551727 | 0,225133325 |  |
| 241631_at    | -               | -1,812418401 | -2,037551727 | 0,225133325 |  |
| 241995_at    | DGUOK           | -1,812418401 | -2,037551727 | 0,225133325 |  |
| 244232_at    | -               | -1,812418401 | -2,037551727 | 0,225133325 |  |
| 218213_s_at  | C11orf10        | 6,331845983  | 6,10680026   | 0,225045724 |  |
| 201732_s_at  | CLCN3           | 1,549482847  | 1,324440845  | 0,225042001 |  |
| 227356_at    | LOC100507015    | 1,549482847  | 1,324440845  | 0,225042001 |  |
| 221891_x_at  | HSPA8 /// SNOR  | 7,5021223    | 7,277120604  | 0,225001697 |  |
| 235773_at    | ZIK1            | 0,57782909   | 0,352836757  | 0,224992333 |  |
| 235939_at    | -               | 0,57782909   | 0,352836757  | 0,224992333 |  |
| 214906_x_at  | N4BP2L1         | 0,401366113  | 0,176436073  | 0,22493004  |  |
| 237504_at    | INTS10          | 0,401366113  | 0,176436073  | 0,22493004  |  |
| 243539_at    | KIAA1841        | 0,401366113  | 0,176436073  | 0,22493004  |  |

|              |              |              |              |             |  |
|--------------|--------------|--------------|--------------|-------------|--|
| 1553741_at   | LINC00337    | -1,937711681 | -2,162639771 | 0,22492809  |  |
| 1555019_at   | CDHR1        | -1,937711681 | -2,162639771 | 0,22492809  |  |
| 1558300_at   | EFCAB5       | -1,937711681 | -2,162639771 | 0,22492809  |  |
| 1566505_at   | ERVVK13-1    | -1,937711681 | -2,162639771 | 0,22492809  |  |
| 1570393_at   | EML5         | -1,937711681 | -2,162639771 | 0,22492809  |  |
| 204380_s_at  | FGFR3        | -1,937711681 | -2,162639771 | 0,22492809  |  |
| 205772_s_at  | -            | -1,937711681 | -2,162639771 | 0,22492809  |  |
| 214200_s_at  | COL6A1       | -1,937711681 | -2,162639771 | 0,22492809  |  |
| 216687_x_at  | UGT2B15      | -1,937711681 | -2,162639771 | 0,22492809  |  |
| 217616_at    | -            | -1,937711681 | -2,162639771 | 0,22492809  |  |
| 223817_at    | LRRIQ1       | -1,937711681 | -2,162639771 | 0,22492809  |  |
| 224422_x_at  | PMCHL2       | -1,937711681 | -2,162639771 | 0,22492809  |  |
| 230915_at    | DHRS7C       | -1,937711681 | -2,162639771 | 0,22492809  |  |
| 238480_at    | TTC39C       | -1,937711681 | -2,162639771 | 0,22492809  |  |
| 240791_at    | -            | -1,937711681 | -2,162639771 | 0,22492809  |  |
| 241240_at    | -            | -1,937711681 | -2,162639771 | 0,22492809  |  |
| 241717_at    | LOC285281    | -1,937711681 | -2,162639771 | 0,22492809  |  |
| 241844_x_at  | TMEM156      | -1,937711681 | -2,162639771 | 0,22492809  |  |
| 242024_at    | -            | -1,937711681 | -2,162639771 | 0,22492809  |  |
| 243187_at    | -            | -1,937711681 | -2,162639771 | 0,22492809  |  |
| 244164_at    | -            | -1,937711681 | -2,162639771 | 0,22492809  |  |
| 244325_at    | -            | -1,937711681 | -2,162639771 | 0,22492809  |  |
| 244418_at    | -            | -1,937711681 | -2,162639771 | 0,22492809  |  |
| 205742_at    | TNNI3        | 0,20027154   | -0,024572586 | 0,224844126 |  |
| 212905_at    | CSTF2T       | 1,201332287  | 0,976641161  | 0,224691126 |  |
| 205293_x_at  | BAIAP2       | -0,033456564 | -0,258114234 | 0,22465767  |  |
| 240235_at    | C10orf62     | -0,033456564 | -0,258114234 | 0,22465767  |  |
| 240607_at    | MIAT         | -0,033456564 | -0,258114234 | 0,22465767  |  |
| 241919_x_at  | WDR31        | -0,033456564 | -0,258114234 | 0,22465767  |  |
| 201968_s_at  | PGM1         | 1,089278259  | 0,864649967  | 0,224628292 |  |
| 216387_x_at  | -            | 1,089278259  | 0,864649967  | 0,224628292 |  |
| 244641_at    | MALSU1       | 1,089278259  | 0,864649967  | 0,224628292 |  |
| 204668_at    | RNF24        | 2,566371329  | 2,341749893  | 0,224621437 |  |
| 236492_at    | PPP2R2A      | 2,146943689  | 1,922365006  | 0,224578683 |  |
| 1567410_at   | ZNF135       | 1,238353345  | 1,013870809  | 0,224482536 |  |
| 213292_s_at  | SNX13        | 1,968405881  | 1,743944487  | 0,224461394 |  |
| 202051_s_at  | ZMYM4        | 3,340506684  | 3,116064987  | 0,224441697 |  |
| 237779_at    | LOC100505711 | 1,129248302  | 0,904843258  | 0,224405043 |  |
| 238007_at    | ZNF271       | 1,129248302  | 0,904843258  | 0,224405043 |  |
| 1556312_at   | C2orf71      | -0,888496123 | -1,112851844 | 0,224355721 |  |
| 1557719_at   | PIKFYVE      | -0,888496123 | -1,112851844 | 0,224355721 |  |
| 1565000_a_at | TCP11L2      | -0,888496123 | -1,112851844 | 0,224355721 |  |
| 205819_at    | MARCO        | -0,888496123 | -1,112851844 | 0,224355721 |  |
| 208476_s_at  | FRMD4A       | -0,888496123 | -1,112851844 | 0,224355721 |  |
| 219998_at    | LGALS1       | -0,888496123 | -1,112851844 | 0,224355721 |  |
| 221256_s_at  | HDHD3        | -0,888496123 | -1,112851844 | 0,224355721 |  |
| 224051_at    | -            | -0,888496123 | -1,112851844 | 0,224355721 |  |
| 230318_at    | SERPINA1     | -0,888496123 | -1,112851844 | 0,224355721 |  |
| 231359_at    | APOH         | -0,888496123 | -1,112851844 | 0,224355721 |  |
| 238531_x_at  | -            | -0,888496123 | -1,112851844 | 0,224355721 |  |
| 239015_at    | THAP7-AS1    | -0,888496123 | -1,112851844 | 0,224355721 |  |
| 239232_at    | MSI2         | -0,888496123 | -1,112851844 | 0,224355721 |  |
| 242713_at    | -            | -0,888496123 | -1,112851844 | 0,224355721 |  |
| 224900_at    | ANKFY1       | 3,554701391  | 3,330438773  | 0,224262619 |  |
| 212232_at    | FNBP4        | 3,406034785  | 3,181801492  | 0,224233293 |  |
| 227017_at    | ERICH1       | 3,541801785  | 3,317734938  | 0,224066847 |  |

|              |                 |              |              |             |  |
|--------------|-----------------|--------------|--------------|-------------|--|
| 212693_at    | MDN1            | 3,367911651  | 3,14392006   | 0,223991591 |  |
| 1570198_x_at | -               | 0,928678725  | 0,704715219  | 0,223963506 |  |
| 204761_at    | USP6NL          | 0,928678725  | 0,704715219  | 0,223963506 |  |
| 1553752_at   | SPATA25         | -1,688127507 | -1,912089812 | 0,223962305 |  |
| 1555108_at   | SLC10A7         | -1,688127507 | -1,912089812 | 0,223962305 |  |
| 1556879_at   | -               | -1,688127507 | -1,912089812 | 0,223962305 |  |
| 1558600_a_at | -               | -1,688127507 | -1,912089812 | 0,223962305 |  |
| 1561375_at   | -               | -1,688127507 | -1,912089812 | 0,223962305 |  |
| 1561427_at   | -               | -1,688127507 | -1,912089812 | 0,223962305 |  |
| 1569659_at   | LOC100506895    | -1,688127507 | -1,912089812 | 0,223962305 |  |
| 206655_s_at  | GP1BB /// SEPT5 | -1,688127507 | -1,912089812 | 0,223962305 |  |
| 213155_at    | LOC339166 /// W | -1,688127507 | -1,912089812 | 0,223962305 |  |
| 213158_at    | -               | -1,688127507 | -1,912089812 | 0,223962305 |  |
| 215972_at    | PART1           | -1,688127507 | -1,912089812 | 0,223962305 |  |
| 220646_s_at  | KLRF1           | -1,688127507 | -1,912089812 | 0,223962305 |  |
| 230660_at    | SERTAD4         | -1,688127507 | -1,912089812 | 0,223962305 |  |
| 231343_at    | -               | -1,688127507 | -1,912089812 | 0,223962305 |  |
| 233262_at    | -               | -1,688127507 | -1,912089812 | 0,223962305 |  |
| 234742_at    | SIRPG           | -1,688127507 | -1,912089812 | 0,223962305 |  |
| 237406_at    | NEK6            | -1,688127507 | -1,912089812 | 0,223962305 |  |
| 238999_at    | -               | -1,688127507 | -1,912089812 | 0,223962305 |  |
| 241046_at    | LOC100505903    | -1,688127507 | -1,912089812 | 0,223962305 |  |
| 244722_at    | -               | -1,688127507 | -1,912089812 | 0,223962305 |  |
| 208832_at    | ATXN10          | 1,224581536  | 1,000684521  | 0,223897015 |  |
| 218971_s_at  | WDR91           | 1,666156729  | 1,442269454  | 0,223887274 |  |
| 243643_x_at  | SLC30A6         | 2,014487247  | 1,790660532  | 0,223826715 |  |
| 222737_s_at  | BRD7            | 2,896728217  | 2,672945617  | 0,223782599 |  |
| 227286_at    | INO80E          | 1,951783949  | 1,728030156  | 0,223753792 |  |
| 215111_s_at  | TSC22D1         | 6,554194938  | 6,330515692  | 0,223679246 |  |
| 206187_at    | PTGIR           | 0,641402394  | 0,417770464  | 0,223631931 |  |
| 226781_at    | C7orf55         | 4,036776538  | 3,813221015  | 0,223555523 |  |
| 222727_s_at  | SLC24A6         | -0,423248115 | -0,646746079 | 0,223497963 |  |
| 228360_at    | LYPD6B          | -0,423248115 | -0,646746079 | 0,223497963 |  |
| 236041_at    | -               | -0,423248115 | -0,646746079 | 0,223497963 |  |
| 230102_at    | ETV5            | 1,314003737  | 1,090553537  | 0,2234502   |  |
| 1552772_at   | CLEC4D          | -2,063149277 | -2,286583451 | 0,223434173 |  |
| 1553194_at   | NEGR1           | -2,063149277 | -2,286583451 | 0,223434173 |  |
| 1555400_at   | LOC645261       | -2,063149277 | -2,286583451 | 0,223434173 |  |
| 1557835_at   | -               | -2,063149277 | -2,286583451 | 0,223434173 |  |
| 1569033_at   | IGF2BP3         | -2,063149277 | -2,286583451 | 0,223434173 |  |
| 211907_s_at  | PARD6B          | -2,063149277 | -2,286583451 | 0,223434173 |  |
| 214642_x_at  | MAGEA10-MAGE    | -2,063149277 | -2,286583451 | 0,223434173 |  |
| 215601_at    | -               | -2,063149277 | -2,286583451 | 0,223434173 |  |
| 229708_at    | C9orf167        | -2,063149277 | -2,286583451 | 0,223434173 |  |
| 229739_s_at  | FAM116B         | -2,063149277 | -2,286583451 | 0,223434173 |  |
| 230607_at    | -               | -2,063149277 | -2,286583451 | 0,223434173 |  |
| 232497_at    | ZNF3            | -2,063149277 | -2,286583451 | 0,223434173 |  |
| 233578_at    | C1orf101        | -2,063149277 | -2,286583451 | 0,223434173 |  |
| 234036_x_at  | -               | -2,063149277 | -2,286583451 | 0,223434173 |  |
| 234378_at    | -               | -2,063149277 | -2,286583451 | 0,223434173 |  |
| 235521_at    | HOXA3           | -2,063149277 | -2,286583451 | 0,223434173 |  |
| 236432_at    | -               | -2,063149277 | -2,286583451 | 0,223434173 |  |
| 236543_at    | -               | -2,063149277 | -2,286583451 | 0,223434173 |  |
| 236952_at    | -               | -2,063149277 | -2,286583451 | 0,223434173 |  |
| 238834_at    | MYLK3           | -2,063149277 | -2,286583451 | 0,223434173 |  |
| 244581_at    | ZBTB20          | -2,063149277 | -2,286583451 | 0,223434173 |  |

|              |                  |              |              |             |  |
|--------------|------------------|--------------|--------------|-------------|--|
| 218775_s_at  | CLDN22 /// WW    | 1,560488174  | 1,337086025  | 0,223402149 |  |
| 207011_s_at  | PTK7             | 1,210676994  | 0,987376598  | 0,223300396 |  |
| 219114_at    | C3orf18          | 1,210676994  | 0,987376598  | 0,223300396 |  |
| 226493_at    | KCTD18           | 1,210676994  | 0,987376598  | 0,223300396 |  |
| 201643_x_at  | KDM3B            | 4,10413628   | 3,880994209  | 0,22314207  |  |
| 228868_x_at  | CDT1             | 2,901063789  | 2,677924589  | 0,2231392   |  |
| 1560560_at   | -                | 1,820612054  | 1,59747851   | 0,223133544 |  |
| 226652_at    | USP3             | 1,722769813  | 1,499637023  | 0,223132791 |  |
| 226609_at    | DCBLD1           | 1,504602299  | 1,281471383  | 0,223130916 |  |
| 226117_at    | TIFA             | 0,533835206  | 0,310717132  | 0,223118074 |  |
| 1554982_a_at | C9orf11          | -2,667025278 | -2,89013181  | 0,223106533 |  |
| 1555057_at   | NDUFS4           | -2,667025278 | -2,89013181  | 0,223106533 |  |
| 1555571_at   | IMMP2L           | -2,667025278 | -2,89013181  | 0,223106533 |  |
| 1556167_at   | HEATR7B1         | -2,667025278 | -2,89013181  | 0,223106533 |  |
| 1556288_at   | C18orf62         | -2,667025278 | -2,89013181  | 0,223106533 |  |
| 1560491_at   | LOC100507193     | -2,667025278 | -2,89013181  | 0,223106533 |  |
| 1561351_at   | -                | -2,667025278 | -2,89013181  | 0,223106533 |  |
| 1562761_at   | NMRK1            | -2,667025278 | -2,89013181  | 0,223106533 |  |
| 1562828_at   | -                | -2,667025278 | -2,89013181  | 0,223106533 |  |
| 1564273_at   | -                | -2,667025278 | -2,89013181  | 0,223106533 |  |
| 1569168_at   | -                | -2,667025278 | -2,89013181  | 0,223106533 |  |
| 206638_at    | HTR2B            | -2,667025278 | -2,89013181  | 0,223106533 |  |
| 210516_at    | FAM120A          | -2,667025278 | -2,89013181  | 0,223106533 |  |
| 213317_at    | CLIC5            | -2,667025278 | -2,89013181  | 0,223106533 |  |
| 217454_at    | -                | -2,667025278 | -2,89013181  | 0,223106533 |  |
| 220359_s_at  | ARPP21           | -2,667025278 | -2,89013181  | 0,223106533 |  |
| 221152_at    | COL8A1           | -2,667025278 | -2,89013181  | 0,223106533 |  |
| 1552340_at   | SP7              | -1,639579028 | -1,862647763 | 0,223068734 |  |
| 1556498_at   | FAM69A           | -1,639579028 | -1,862647763 | 0,223068734 |  |
| 207043_s_at  | SLC6A9           | -1,639579028 | -1,862647763 | 0,223068734 |  |
| 210118_s_at  | IL1A             | -1,639579028 | -1,862647763 | 0,223068734 |  |
| 217435_x_at  | -                | -1,639579028 | -1,862647763 | 0,223068734 |  |
| 229381_at    | C1orf64          | -1,639579028 | -1,862647763 | 0,223068734 |  |
| 229967_at    | CMTM2            | -1,639579028 | -1,862647763 | 0,223068734 |  |
| 231642_at    | C6orf201         | -1,639579028 | -1,862647763 | 0,223068734 |  |
| 233783_at    | -                | -1,639579028 | -1,862647763 | 0,223068734 |  |
| 234270_at    | -                | -1,639579028 | -1,862647763 | 0,223068734 |  |
| 237004_at    | -                | -1,639579028 | -1,862647763 | 0,223068734 |  |
| 238786_at    | ANK3             | -1,639579028 | -1,862647763 | 0,223068734 |  |
| 244280_at    | LOC100507254     | -1,639579028 | -1,862647763 | 0,223068734 |  |
| 244512_at    | HOXB-AS3         | -1,639579028 | -1,862647763 | 0,223068734 |  |
| 200916_at    | TAGLN2           | 6,406236089  | 6,183200519  | 0,22303557  |  |
| 208743_s_at  | YWHAB            | 5,786920447  | 5,563892546  | 0,223027902 |  |
| 231406_at    | ORAI2            | 1,414471577  | 1,191491281  | 0,222980296 |  |
| 1562254_at   | -                | 0,351548291  | 0,128747141  | 0,22280115  |  |
| 210977_s_at  | HSF4             | 0,351548291  | 0,128747141  | 0,22280115  |  |
| 211135_x_at  | LILRA6 /// LILRB | 0,351548291  | 0,128747141  | 0,22280115  |  |
| 212850_s_at  | LRP4             | 0,351548291  | 0,128747141  | 0,22280115  |  |
| 219133_at    | OXSM             | 3,223057183  | 3,000258961  | 0,222798223 |  |
| 228954_at    | LYSMD4           | 1,593009234  | 1,370274469  | 0,222734765 |  |
| 201443_s_at  | ATP6AP2          | 6,596523732  | 6,373860376  | 0,222663355 |  |
| 225228_at    | DRAM2            | 1,352503698  | 1,129843209  | 0,22266049  |  |
| 201259_s_at  | SYPL1            | 4,462972394  | 4,24031851   | 0,222653884 |  |
| 226782_at    | SLC25A30         | 2,043538949  | 1,820984782  | 0,222554167 |  |
| 222442_s_at  | ARL8B            | 4,170287948  | 3,947788666  | 0,222499281 |  |
| 36084_at     | CUL7             | 1,82518214   | 1,602724378  | 0,222457762 |  |

|              |                  |              |              |             |  |
|--------------|------------------|--------------|--------------|-------------|--|
| 1563019_at   | -                | -0,543051993 | -0,765504029 | 0,222452036 |  |
| 1565694_at   | DTYMK            | -0,543051993 | -0,765504029 | 0,222452036 |  |
| 206618_at    | IL18R1           | -0,543051993 | -0,765504029 | 0,222452036 |  |
| 216253_s_at  | PARVB            | -0,543051993 | -0,765504029 | 0,222452036 |  |
| 216888_at    | LDB3             | -0,543051993 | -0,765504029 | 0,222452036 |  |
| 221038_at    | -                | -0,543051993 | -0,765504029 | 0,222452036 |  |
| 239832_at    | -                | -0,543051993 | -0,765504029 | 0,222452036 |  |
| 239996_x_at  | ATP2A2           | -0,543051993 | -0,765504029 | 0,222452036 |  |
| 240258_at    | ENO1             | -0,543051993 | -0,765504029 | 0,222452036 |  |
| 241392_at    | TMEM39A          | -0,543051993 | -0,765504029 | 0,222452036 |  |
| 202484_s_at  | MBD2             | 3,966117062  | 3,743690278  | 0,222426784 |  |
| 1552826_at   | SLC26A7          | -3,013665402 | -3,236070201 | 0,222404799 |  |
| 1557644_at   | -                | -3,013665402 | -3,236070201 | 0,222404799 |  |
| 221154_at    | LOC100131392 /   | -3,013665402 | -3,236070201 | 0,222404799 |  |
| 221212_x_at  | PBRM1            | -3,013665402 | -3,236070201 | 0,222404799 |  |
| 237902_at    | -                | -3,013665402 | -3,236070201 | 0,222404799 |  |
| 240662_at    | -                | -3,013665402 | -3,236070201 | 0,222404799 |  |
| 243274_x_at  | -                | -3,013665402 | -3,236070201 | 0,222404799 |  |
| 1554154_at   | GDAP2            | 1,143956113  | 0,921731975  | 0,222224138 |  |
| 219017_at    | ETNK1            | 1,143956113  | 0,921731975  | 0,222224138 |  |
| 213253_at    | SMC2             | 1,940595304  | 1,718396606  | 0,222198698 |  |
| 202934_at    | HK2              | 4,529358299  | 4,307183466  | 0,222174833 |  |
| 209229_s_at  | PPP6R1           | 2,525769574  | 2,303602088  | 0,222167487 |  |
| 227861_at    | TMEM161B         | 3,489018063  | 3,266872397  | 0,222145666 |  |
| 35666_at     | SEMA3F           | 1,481627361  | 1,259496994  | 0,222130367 |  |
| 205352_at    | SERPINI1         | 3,809644985  | 3,587527995  | 0,22211699  |  |
| 213227_at    | LOC100652849 /   | 3,604290432  | 3,382199319  | 0,222091113 |  |
| 228107_at    | LOC100127983     | 4,00557508   | 3,783501543  | 0,222073537 |  |
| 212615_at    | CHD9             | 2,497416546  | 2,275409734  | 0,222006811 |  |
| 221069_s_at  | TACO1            | 2,497416546  | 2,275409734  | 0,222006811 |  |
| 1569642_at   | F2R              | 2,886560922  | 2,664608955  | 0,221951967 |  |
| 231277_x_at  | DTWD2            | 1,027166904  | 0,805216064  | 0,22195084  |  |
| 1558425_x_at | LINC00265 /// LC | -0,196756757 | -0,41858459  | 0,221827833 |  |
| 203585_at    | ZNF185           | -0,196756757 | -0,41858459  | 0,221827833 |  |
| 232604_at    | ZNF541           | -0,196756757 | -0,41858459  | 0,221827833 |  |
| 233836_at    | TNRC6A           | -0,196756757 | -0,41858459  | 0,221827833 |  |
| 236350_at    | -                | -0,196756757 | -0,41858459  | 0,221827833 |  |
| 238578_at    | TMEM182          | -0,196756757 | -0,41858459  | 0,221827833 |  |
| 1557950_at   | NEMF             | 3,127619759  | 2,905803877  | 0,221815882 |  |
| 212541_at    | FLAD1            | 3,088871381  | 2,867091644  | 0,221779737 |  |
| 203515_s_at  | PMVK             | 1,758252436  | 1,536652708  | 0,221599729 |  |
| 232278_s_at  | DEPDC1           | 2,470441349  | 2,248887791  | 0,221553558 |  |
| 202812_at    | GAA              | 1,326951551  | 1,105412836  | 0,221538715 |  |
| 215382_x_at  | TPSAB1           | 0,945567441  | 0,724100169  | 0,221467272 |  |
| 224881_at    | VKORC1L1         | 2,573632254  | 2,352169913  | 0,221462341 |  |
| 1558675_s_at | NEMF             | 3,75958912   | 3,538185672  | 0,221403448 |  |
| 213210_at    | TAF6L            | 0,425644434  | 0,204310755  | 0,221333678 |  |
| 238904_at    | NOVA2            | 0,425644434  | 0,204310755  | 0,221333678 |  |
| 210175_at    | GCFC2            | 2,644299732  | 2,423075926  | 0,221223806 |  |
| 209441_at    | RHOBTB2          | 0,810733188  | 0,589657387  | 0,221075801 |  |
| 201301_s_at  | ANXA4            | 2,562727117  | 2,341749893  | 0,220977224 |  |
| 1553482_at   | C15orf32         | -2,187914861 | -2,408705138 | 0,220790276 |  |
| 1555634_a_at | LILRA5           | -2,187914861 | -2,408705138 | 0,220790276 |  |
| 1556231_a_at | -                | -2,187914861 | -2,408705138 | 0,220790276 |  |
| 1558949_at   | TNRC18           | -2,187914861 | -2,408705138 | 0,220790276 |  |
| 1566780_at   | -                | -2,187914861 | -2,408705138 | 0,220790276 |  |

|              |                |              |              |             |  |
|--------------|----------------|--------------|--------------|-------------|--|
| 206924_at    | IL11           | -2,187914861 | -2,408705138 | 0,220790276 |  |
| 207420_at    | COLEC10        | -2,187914861 | -2,408705138 | 0,220790276 |  |
| 215078_at    | LOC100129518 / | -2,187914861 | -2,408705138 | 0,220790276 |  |
| 217562_at    | FAM5C          | -2,187914861 | -2,408705138 | 0,220790276 |  |
| 220456_at    | SPTLC3         | -2,187914861 | -2,408705138 | 0,220790276 |  |
| 228794_at    | XIRP2          | -2,187914861 | -2,408705138 | 0,220790276 |  |
| 231593_at    | -              | -2,187914861 | -2,408705138 | 0,220790276 |  |
| 232875_at    | -              | -2,187914861 | -2,408705138 | 0,220790276 |  |
| 232924_at    | LRRC17         | -2,187914861 | -2,408705138 | 0,220790276 |  |
| 233438_at    | -              | -2,187914861 | -2,408705138 | 0,220790276 |  |
| 233887_at    | GPR126         | -2,187914861 | -2,408705138 | 0,220790276 |  |
| 237547_at    | -              | -2,187914861 | -2,408705138 | 0,220790276 |  |
| 237798_at    | -              | -2,187914861 | -2,408705138 | 0,220790276 |  |
| 237893_at    | -              | -2,187914861 | -2,408705138 | 0,220790276 |  |
| 238524_at    | -              | -2,187914861 | -2,408705138 | 0,220790276 |  |
| 238697_at    | -              | -2,187914861 | -2,408705138 | 0,220790276 |  |
| 239095_at    | -              | -2,187914861 | -2,408705138 | 0,220790276 |  |
| 223336_s_at  | RAB18          | 4,035462473  | 3,814728712  | 0,22073376  |  |
| 219763_at    | DENND1A        | 0,228146222  | 0,007421914  | 0,220724308 |  |
| 228278_at    | NFIX           | 0,228146222  | 0,007421914  | 0,220724308 |  |
| 218933_at    | SPATA5L1       | 2,2992452    | 2,078620836  | 0,220624365 |  |
| 219328_at    | DDX31          | 2,506929603  | 2,286318242  | 0,220611361 |  |
| 207821_s_at  | LOC100653024 / | 3,431234921  | 3,210719429  | 0,220515492 |  |
| 52164_at     | C11orf24       | 3,317444932  | 3,096985084  | 0,220459848 |  |
| 1554171_at   | ZMYM3          | 0,715481152  | 0,495031851  | 0,220449301 |  |
| 212486_s_at  | FYN            | 0,715481152  | 0,495031851  | 0,220449301 |  |
| 229838_at    | NUCB2          | 1,493160564  | 1,272721751  | 0,220438813 |  |
| 202152_x_at  | USF2           | 3,566577193  | 3,346162854  | 0,220414339 |  |
| 221626_at    | ZNF506         | 1,037706275  | 0,817300337  | 0,220405938 |  |
| 219260_s_at  | C17orf81       | 2,779171778  | 2,558821855  | 0,220349923 |  |
| 208246_x_at  | -              | 4,017604437  | 3,797294336  | 0,220310101 |  |
| 212441_at    | KIAA0232       | 3,336243945  | 3,116064987  | 0,220178958 |  |
| 242283_at    | DNAH14         | 1,638726528  | 1,418668082  | 0,220058446 |  |
| 228378_at    | C12orf29       | 3,84757742   | 3,62753841   | 0,22003901  |  |
| 225723_at    | CCDC167        | 3,268508253  | 3,048471686  | 0,220036567 |  |
| 209837_at    | AP4M1          | 1,434549838  | 1,214517879  | 0,220031959 |  |
| 1558766_at   | -              | -1,518072576 | -1,738067356 | 0,21999478  |  |
| 1560785_at   | DYRK3          | -1,518072576 | -1,738067356 | 0,21999478  |  |
| 1561226_at   | XCR1           | -1,518072576 | -1,738067356 | 0,21999478  |  |
| 1565765_x_at | C13orf33       | -1,518072576 | -1,738067356 | 0,21999478  |  |
| 1567320_at   | -              | -1,518072576 | -1,738067356 | 0,21999478  |  |
| 1569449_a_at | -              | -1,518072576 | -1,738067356 | 0,21999478  |  |
| 203634_s_at  | CPT1A          | -1,518072576 | -1,738067356 | 0,21999478  |  |
| 208134_x_at  | PSG2           | -1,518072576 | -1,738067356 | 0,21999478  |  |
| 214139_at    | ARID4B         | -1,518072576 | -1,738067356 | 0,21999478  |  |
| 217311_at    | -              | -1,518072576 | -1,738067356 | 0,21999478  |  |
| 223995_at    | SLC12A9        | -1,518072576 | -1,738067356 | 0,21999478  |  |
| 227148_at    | PLEKHH2        | -1,518072576 | -1,738067356 | 0,21999478  |  |
| 228461_at    | SH3RF3         | -1,518072576 | -1,738067356 | 0,21999478  |  |
| 228491_at    | KRT19          | -1,518072576 | -1,738067356 | 0,21999478  |  |
| 231261_at    | CATSPERG       | -1,518072576 | -1,738067356 | 0,21999478  |  |
| 236596_at    | -              | -1,518072576 | -1,738067356 | 0,21999478  |  |
| 238792_at    | PCNX           | -1,518072576 | -1,738067356 | 0,21999478  |  |
| 242179_s_at  | TSPAN16        | -1,518072576 | -1,738067356 | 0,21999478  |  |
| 243408_at    | -              | -1,518072576 | -1,738067356 | 0,21999478  |  |
| 207719_x_at  | CEP170         | 4,282548314  | 4,062643488  | 0,219904826 |  |

|              |                 |              |              |             |  |
|--------------|-----------------|--------------|--------------|-------------|--|
| 210211_s_at  | HSP90AA1        | 7,668079424  | 7,44818613   | 0,219893294 |  |
| 219322_s_at  | WRAP73          | 2,782308844  | 2,562416132  | 0,219892712 |  |
| 223575_at    | KIAA1549        | 0,555999837  | 0,336136178  | 0,219863659 |  |
| 210964_s_at  | GYG2            | -0,00073712  | -0,220592223 | 0,219855103 |  |
| 212283_at    | AGRN            | -0,00073712  | -0,220592223 | 0,219855103 |  |
| 241939_at    | IQGAP3          | -0,00073712  | -0,220592223 | 0,219855103 |  |
| 243185_at    | LOC100507228    | -0,00073712  | -0,220592223 | 0,219855103 |  |
| 219873_at    | COLEC11         | 0,95671774   | 0,73688026   | 0,21983748  |  |
| 238448_at    | MRPL19          | 0,95671774   | 0,73688026   | 0,21983748  |  |
| 236193_at    | HIST1H2BC       | 2,819431021  | 2,599625088  | 0,219805933 |  |
| 204397_at    | EML2            | 0,613492853  | 0,393761504  | 0,219731349 |  |
| 211540_s_at  | RB1             | 0,613492853  | 0,393761504  | 0,219731349 |  |
| 209491_s_at  | AMPD3           | 0,083054335  | -0,136643983 | 0,219698317 |  |
| 213276_at    | CAMK2B          | 0,083054335  | -0,136643983 | 0,219698317 |  |
| 215668_s_at  | PLXNB1          | 0,083054335  | -0,136643983 | 0,219698317 |  |
| 231221_at    | CLEC16A         | 0,083054335  | -0,136643983 | 0,219698317 |  |
| 238557_at    | LOC100144603    | 0,083054335  | -0,136643983 | 0,219698317 |  |
| 202819_s_at  | TCEB3           | 3,217273782  | 2,997606395  | 0,219667386 |  |
| 1554273_a_at | ERAP2           | -2,236765673 | -2,456406426 | 0,219640753 |  |
| 1558216_at   | AFAP1-AS1       | -2,236765673 | -2,456406426 | 0,219640753 |  |
| 1563279_at   | -               | -2,236765673 | -2,456406426 | 0,219640753 |  |
| 1564443_at   | DLEU2           | -2,236765673 | -2,456406426 | 0,219640753 |  |
| 1569846_at   | -               | -2,236765673 | -2,456406426 | 0,219640753 |  |
| 1570354_s_at | ZNF169          | -2,236765673 | -2,456406426 | 0,219640753 |  |
| 216328_at    | SIGLEC8         | -2,236765673 | -2,456406426 | 0,219640753 |  |
| 216359_at    | MUC7            | -2,236765673 | -2,456406426 | 0,219640753 |  |
| 219159_s_at  | SLAMF7          | -2,236765673 | -2,456406426 | 0,219640753 |  |
| 221605_s_at  | PIPOX           | -2,236765673 | -2,456406426 | 0,219640753 |  |
| 223483_at    | SERGEF          | -2,236765673 | -2,456406426 | 0,219640753 |  |
| 226777_at    | ADAM12          | -2,236765673 | -2,456406426 | 0,219640753 |  |
| 228143_at    | CP              | -2,236765673 | -2,456406426 | 0,219640753 |  |
| 229373_at    | -               | -2,236765673 | -2,456406426 | 0,219640753 |  |
| 233457_at    | -               | -2,236765673 | -2,456406426 | 0,219640753 |  |
| 233584_at    | C20orf62        | -2,236765673 | -2,456406426 | 0,219640753 |  |
| 233700_at    | -               | -2,236765673 | -2,456406426 | 0,219640753 |  |
| 237232_at    | -               | -2,236765673 | -2,456406426 | 0,219640753 |  |
| 238170_at    | -               | -2,236765673 | -2,456406426 | 0,219640753 |  |
| 239299_at    | DDI1            | -2,236765673 | -2,456406426 | 0,219640753 |  |
| 240874_at    | -               | -2,236765673 | -2,456406426 | 0,219640753 |  |
| 241531_at    | -               | -2,236765673 | -2,456406426 | 0,219640753 |  |
| 242339_at    | -               | -2,236765673 | -2,456406426 | 0,219640753 |  |
| 243362_s_at  | LEF1-AS1        | -2,236765673 | -2,456406426 | 0,219640753 |  |
| 243972_at    | BTF3L4          | -2,236765673 | -2,456406426 | 0,219640753 |  |
| 1553963_at   | RHOB            | -3,054236653 | -3,273861381 | 0,219624729 |  |
| 1570250_at   | LPPR1           | -3,054236653 | -3,273861381 | 0,219624729 |  |
| 216089_at    | -               | -3,054236653 | -3,273861381 | 0,219624729 |  |
| 217712_at    | -               | -3,054236653 | -3,273861381 | 0,219624729 |  |
| 234221_at    | -               | -3,054236653 | -3,273861381 | 0,219624729 |  |
| 241151_at    | -               | -3,054236653 | -3,273861381 | 0,219624729 |  |
| 204583_x_at  | KLK3            | -0,394749123 | -0,614371577 | 0,219622453 |  |
| 209499_x_at  | TNFSF12 /// TNF | -0,394749123 | -0,614371577 | 0,219622453 |  |
| 209641_s_at  | ABCC3           | -0,394749123 | -0,614371577 | 0,219622453 |  |
| 220811_at    | PRG3            | -0,394749123 | -0,614371577 | 0,219622453 |  |
| 39817_s_at   | C6orf108        | 2,348755185  | 2,129179938  | 0,219575247 |  |
| 208975_s_at  | KPNB1           | 5,204666516  | 4,985166919  | 0,219499597 |  |
| 209699_x_at  | AKR1C2 /// LOC1 | 4,663430187  | 4,44401622   | 0,219413967 |  |

|              |              |              |              |             |  |
|--------------|--------------|--------------|--------------|-------------|--|
| 202882_x_at  | NOL7         | 6,161984103  | 5,942571032  | 0,219413072 |  |
| 209346_s_at  | PI4K2A       | 1,937784532  | 1,718396606  | 0,219387926 |  |
| 219231_at    | TGS1         | 3,523171367  | 3,303845028  | 0,219326339 |  |
| 213416_at    | ITGA4        | 4,427846607  | 4,208556964  | 0,219289643 |  |
| 224687_at    | ANKIB1       | 1,774096855  | 1,55481039   | 0,219286465 |  |
| 222482_at    | SSBP3        | 3,823415835  | 3,604188755  | 0,219227081 |  |
| 202547_s_at  | ARHGEF7      | 1,274448124  | 1,055274826  | 0,219173298 |  |
| 203912_s_at  | DNASE1L1     | 0,376672223  | 0,157549243  | 0,21912298  |  |
| 215766_at    | GSTA1        | 0,376672223  | 0,157549243  | 0,21912298  |  |
| 218600_at    | LIMD2        | 0,376672223  | 0,157549243  | 0,21912298  |  |
| 224443_at    | LINC00467    | 0,376672223  | 0,157549243  | 0,21912298  |  |
| 227906_s_at  | -            | 0,376672223  | 0,157549243  | 0,21912298  |  |
| 201576_s_at  | GLB1         | 4,041366364  | 3,822243651  | 0,219122713 |  |
| 202655_at    | MANF         | 3,999522577  | 3,780418488  | 0,21910409  |  |
| 222229_x_at  | -            | 6,549714613  | 6,33064743   | 0,219067183 |  |
| 209208_at    | MPDU1        | 3,872077355  | 3,653046807  | 0,219030548 |  |
| 222070_at    | DND1         | 0,44160593   | 0,222599095  | 0,219006835 |  |
| 231829_at    | MAVS         | 0,44160593   | 0,222599095  | 0,219006835 |  |
| 223450_s_at  | COG3         | 1,699726954  | 1,480766833  | 0,218960122 |  |
| 209849_s_at  | RAD51C       | 4,08838118   | 3,869433939  | 0,218947242 |  |
| 207551_s_at  | MSL3         | 4,191091206  | 3,972313606  | 0,2187776   |  |
| 216438_s_at  | TMSB4X       | 7,938367101  | 7,71961713   | 0,218749971 |  |
| 224282_s_at  | AGPAT3       | 1,168140757  | 0,949447784  | 0,218692973 |  |
| 211084_x_at  | PRKD3        | 1,649074067  | 1,43051703   | 0,218557036 |  |
| 1552775_at   | GPRC6A       | -0,512251684 | -0,730778808 | 0,218527123 |  |
| 224547_at    | -            | -0,512251684 | -0,730778808 | 0,218527123 |  |
| 238767_at    | -            | -0,512251684 | -0,730778808 | 0,218527123 |  |
| 243430_at    | SEZ6         | -0,512251684 | -0,730778808 | 0,218527123 |  |
| 228909_at    | LOC642852    | 2,804079361  | 2,585563171  | 0,21851619  |  |
| 1556542_a_at | -            | -0,83191556  | -1,050406615 | 0,218491055 |  |
| 1556962_at   | -            | -0,83191556  | -1,050406615 | 0,218491055 |  |
| 217545_at    | MYH14        | -0,83191556  | -1,050406615 | 0,218491055 |  |
| 219160_s_at  | PAPOLG       | -0,83191556  | -1,050406615 | 0,218491055 |  |
| 221283_at    | RUNX2        | -0,83191556  | -1,050406615 | 0,218491055 |  |
| 232883_at    | -            | -0,83191556  | -1,050406615 | 0,218491055 |  |
| 237861_at    | LOC100506105 | -0,83191556  | -1,050406615 | 0,218491055 |  |
| 213170_at    | GPX7         | 2,009141686  | 1,790660532  | 0,218481154 |  |
| 1569878_at   | CCNYL2       | 2,030406107  | 1,811954245  | 0,218451863 |  |
| 211932_at    | HNRNPA3      | 4,501552344  | 4,283151707  | 0,218400636 |  |
| 225691_at    | CDK12        | 2,768138014  | 2,549796788  | 0,218341226 |  |
| 205396_at    | SMAD3        | -0,172274514 | -0,39061235  | 0,218337836 |  |
| 215946_x_at  | IGLL3P       | -0,172274514 | -0,39061235  | 0,218337836 |  |
| 238469_at    | OGFRL1       | -0,172274514 | -0,39061235  | 0,218337836 |  |
| 242969_at    | ZNF780B      | -0,172274514 | -0,39061235  | 0,218337836 |  |
| 217993_s_at  | MAT2B        | 5,310855527  | 5,092541763  | 0,218313765 |  |
| 208696_at    | CCT5         | 6,738503329  | 6,520345731  | 0,218157598 |  |
| 204651_at    | NRF1         | 1,567778694  | 1,349621332  | 0,218157362 |  |
| 1556265_at   | C20orf202    | 0,171847695  | -0,046302147 | 0,218149842 |  |
| 203866_at    | NLE1         | 0,171847695  | -0,046302147 | 0,218149842 |  |
| 236737_at    | C17orf56     | 0,171847695  | -0,046302147 | 0,218149842 |  |
| 228292_at    | -            | 1,05337236   | 0,835239052  | 0,218133307 |  |
| 1559675_at   | -            | 1,094335495  | 0,876248481  | 0,218087014 |  |
| 200646_s_at  | NUCB1        | 1,094335495  | 0,876248481  | 0,218087014 |  |
| 204512_at    | HIVEP1       | 0,246434561  | 0,028364014  | 0,218070547 |  |
| 226231_at    | PAWR         | 0,246434561  | 0,028364014  | 0,218070547 |  |
| 230149_at    | -            | 0,246434561  | 0,028364014  | 0,218070547 |  |



|              |                 |              |              |             |  |
|--------------|-----------------|--------------|--------------|-------------|--|
| 213152_s_at  | SRSF8           | 3,228817493  | 3,010820719  | 0,217996774 |  |
| 218492_s_at  | THAP7           | 1,247462054  | 1,029536893  | 0,21792516  |  |
| 201455_s_at  | LOC100653042 /  | 3,352164686  | 3,134292219  | 0,217872467 |  |
| 218386_x_at  | USP16           | 4,544680214  | 4,326864571  | 0,217815643 |  |
| 202807_s_at  | TOM1            | 0,57058931   | 0,352836757  | 0,217752553 |  |
| 238475_at    | ALG10B          | 0,57058931   | 0,352836757  | 0,217752553 |  |
| 203057_s_at  | PRDM2           | 2,926807124  | 2,709065209  | 0,217741914 |  |
| 220964_s_at  | RAB1B           | 3,276317033  | 3,058687544  | 0,217629489 |  |
| 1557487_at   | -               | 0,735041319  | 0,51742585   | 0,217615469 |  |
| 213512_at    | C14orf79        | 0,735041319  | 0,51742585   | 0,217615469 |  |
| 228226_s_at  | ZNF775          | 0,735041319  | 0,51742585   | 0,217615469 |  |
| 1569415_at   | -               | 1,735773781  | 1,518263577  | 0,217510204 |  |
| 215155_at    | HEXA            | 0,97328325   | 0,755840599  | 0,217442651 |  |
| 236347_at    | MMAA            | 0,97328325   | 0,755840599  | 0,217442651 |  |
| 200910_at    | CCT3            | 6,140295359  | 5,922958221  | 0,217337138 |  |
| 203411_s_at  | LMNA            | 3,529719415  | 3,312408479  | 0,217310936 |  |
| 214263_x_at  | POLR2C          | 4,288076367  | 4,070868415  | 0,217207952 |  |
| 204917_s_at  | MLLT3           | 3,492853048  | 3,275657468  | 0,217195579 |  |
| 236641_at    | KIF14           | 2,825526235  | 2,608344689  | 0,217181546 |  |
| 225154_at    | SYAP1           | 5,523564805  | 5,306440515  | 0,217124291 |  |
| 204071_s_at  | TOPORS          | 3,665883965  | 3,448769219  | 0,217114746 |  |
| 209372_x_at  | TUBB2A /// TUBE | 3,207971844  | 2,990953566  | 0,217018278 |  |
| 201233_at    | PSMD13          | 3,815015946  | 3,598072942  | 0,216943004 |  |
| 208988_at    | KDM2A           | 2,943717636  | 2,726791458  | 0,216926178 |  |
| 1558595_at   | -               | -2,779459409 | -2,996335703 | 0,216876294 |  |
| 1562053_at   | -               | -2,779459409 | -2,996335703 | 0,216876294 |  |
| 1569568_at   | -               | -2,779459409 | -2,996335703 | 0,216876294 |  |
| 215692_s_at  | MPPED2          | -2,779459409 | -2,996335703 | 0,216876294 |  |
| 219073_s_at  | OSBPL10         | -2,779459409 | -2,996335703 | 0,216876294 |  |
| 220919_s_at  | WDR96           | -2,779459409 | -2,996335703 | 0,216876294 |  |
| 230540_at    | -               | -2,779459409 | -2,996335703 | 0,216876294 |  |
| 231279_at    | PATE1           | -2,779459409 | -2,996335703 | 0,216876294 |  |
| 232799_at    | -               | -2,779459409 | -2,996335703 | 0,216876294 |  |
| 233035_at    | -               | -2,779459409 | -2,996335703 | 0,216876294 |  |
| 233332_at    | -               | -2,779459409 | -2,996335703 | 0,216876294 |  |
| 239708_at    | -               | -2,779459409 | -2,996335703 | 0,216876294 |  |
| 240068_at    | LINC00323       | -2,779459409 | -2,996335703 | 0,216876294 |  |
| 240702_at    | HERC1           | -2,779459409 | -2,996335703 | 0,216876294 |  |
| 240726_at    | -               | -2,779459409 | -2,996335703 | 0,216876294 |  |
| 240977_at    | -               | -2,779459409 | -2,996335703 | 0,216876294 |  |
| 241328_at    | ZMAT1           | -2,779459409 | -2,996335703 | 0,216876294 |  |
| 242495_at    | -               | -2,779459409 | -2,996335703 | 0,216876294 |  |
| 243163_at    | -               | -2,779459409 | -2,996335703 | 0,216876294 |  |
| 244715_at    | -               | -2,779459409 | -2,996335703 | 0,216876294 |  |
| 219350_s_at  | DIABLO          | 4,64373014   | 4,426866007  | 0,216864132 |  |
| 202462_s_at  | DDX46           | 5,2950189    | 5,078176444  | 0,216842456 |  |
| 227178_at    | CELF2           | 2,503131904  | 2,286318242  | 0,216813662 |  |
| 1555905_a_at | C3orf23         | 0,020670649  | -0,19610998  | 0,216780629 |  |
| 1556453_at   | LOC100506274    | 0,020670649  | -0,19610998  | 0,216780629 |  |
| 210995_s_at  | TRIM23          | 0,020670649  | -0,19610998  | 0,216780629 |  |
| 224152_s_at  | PBRM1           | 0,020670649  | -0,19610998  | 0,216780629 |  |
| 231860_at    | BRWD1           | 0,020670649  | -0,19610998  | 0,216780629 |  |
| 36030_at     | IFFO1           | 2,010479935  | 1,793721801  | 0,216758134 |  |
| 204634_at    | NEK4            | 2,922548342  | 2,705818724  | 0,216729618 |  |
| 204354_at    | POT1            | 3,950863319  | 3,734161076  | 0,216702243 |  |
| 220033_at    | -               | 0,841135803  | 0,624460759  | 0,216675044 |  |

|              |                 |              |              |             |  |
|--------------|-----------------|--------------|--------------|-------------|--|
| 223759_s_at  | GSG2            | 0,841135803  | 0,624460759  | 0,216675044 |  |
| 204727_at    | WDHD1           | 0,888485433  | 0,67181667   | 0,216668763 |  |
| 212678_at    | NF1             | 0,888485433  | 0,67181667   | 0,216668763 |  |
| 239709_at    | -               | 1,021868205  | 0,805216064  | 0,216652141 |  |
| 212223_at    | IDS             | 1,063722698  | 0,847075464  | 0,216647234 |  |
| 237183_at    | GALNT5          | 1,360921491  | 1,144305291  | 0,2166162   |  |
| 217834_s_at  | SYNCRIP         | 5,231596898  | 5,014984123  | 0,216612775 |  |
| 239482_x_at  | ZNF708          | 1,607231019  | 1,390636111  | 0,216594908 |  |
| 237364_at    | -               | 1,841816345  | 1,6252386    | 0,216577745 |  |
| 215779_s_at  | HIST1H2BC /// H | 2,854131948  | 2,637603218  | 0,216528731 |  |
| 1553602_at   | MUCL1           | -1,047650486 | -1,264005341 | 0,216354855 |  |
| 1553661_a_at | HUS1B           | -1,047650486 | -1,264005341 | 0,216354855 |  |
| 1557016_a_at | C1orf177        | -1,047650486 | -1,264005341 | 0,216354855 |  |
| 1559880_at   | LZTS1-AS1       | -1,047650486 | -1,264005341 | 0,216354855 |  |
| 200939_s_at  | RERE            | -1,047650486 | -1,264005341 | 0,216354855 |  |
| 206910_x_at  | CFHR2           | -1,047650486 | -1,264005341 | 0,216354855 |  |
| 207795_s_at  | KLRD1           | -1,047650486 | -1,264005341 | 0,216354855 |  |
| 217628_at    | CLIC5           | -1,047650486 | -1,264005341 | 0,216354855 |  |
| 226139_at    | CCDC149         | -1,047650486 | -1,264005341 | 0,216354855 |  |
| 229245_at    | PLEKHA6         | -1,047650486 | -1,264005341 | 0,216354855 |  |
| 230222_at    | -               | -1,047650486 | -1,264005341 | 0,216354855 |  |
| 232200_at    | HSPA9           | -1,047650486 | -1,264005341 | 0,216354855 |  |
| 233395_at    | -               | -1,047650486 | -1,264005341 | 0,216354855 |  |
| 234319_at    | STOX2           | -1,047650486 | -1,264005341 | 0,216354855 |  |
| 234438_at    | -               | -1,047650486 | -1,264005341 | 0,216354855 |  |
| 236505_at    | NUP62           | -1,047650486 | -1,264005341 | 0,216354855 |  |
| 237128_at    | -               | -1,047650486 | -1,264005341 | 0,216354855 |  |
| 241310_at    | -               | -1,047650486 | -1,264005341 | 0,216354855 |  |
| 208999_at    | 39692           | 3,453052675  | 3,236821511  | 0,216231164 |  |
| 225653_at    | TGFBRAP1        | 1,795990708  | 1,579853228  | 0,216137479 |  |
| 203341_at    | CEBPZ           | 4,571221501  | 4,355114902  | 0,216106599 |  |
| 215359_x_at  | ZNF44           | 2,783874823  | 2,567790814  | 0,216084009 |  |
| 222774_s_at  | NETO2           | 2,582657321  | 2,366632651  | 0,21602467  |  |
| 232884_s_at  | ZNF853          | 1,331241794  | 1,115234684  | 0,216007109 |  |
| 224186_s_at  | RNF123          | 1,296557217  | 1,080561626  | 0,215995591 |  |
| 212954_at    | DYRK4           | 2,446911392  | 2,230931691  | 0,215979701 |  |
| 222303_at    | -               | 0,984222186  | 0,768343791  | 0,215878395 |  |
| 209796_s_at  | CNPY2           | 4,13575284   | 3,920040657  | 0,215712183 |  |
| 219349_s_at  | EXOC2           | 1,823660386  | 1,60795124   | 0,215709146 |  |
| 235048_at    | FAM169A         | 1,823660386  | 1,60795124   | 0,215709146 |  |
| 1554156_a_at | WFDC8           | -2,359436556 | -2,575129729 | 0,215693173 |  |
| 1554368_at   | NT5C1B          | -2,359436556 | -2,575129729 | 0,215693173 |  |
| 1558881_at   | LOC145820       | -2,359436556 | -2,575129729 | 0,215693173 |  |
| 1561938_at   | -               | -2,359436556 | -2,575129729 | 0,215693173 |  |
| 1562300_at   | -               | -2,359436556 | -2,575129729 | 0,215693173 |  |
| 1564949_at   | -               | -2,359436556 | -2,575129729 | 0,215693173 |  |
| 1565544_at   | RNF141          | -2,359436556 | -2,575129729 | 0,215693173 |  |
| 1568615_a_at | SRD5A3-AS1      | -2,359436556 | -2,575129729 | 0,215693173 |  |
| 1568685_at   | -               | -2,359436556 | -2,575129729 | 0,215693173 |  |
| 1569786_at   | -               | -2,359436556 | -2,575129729 | 0,215693173 |  |
| 208427_s_at  | ELAVL2          | -2,359436556 | -2,575129729 | 0,215693173 |  |
| 215759_at    | ANKRD53         | -2,359436556 | -2,575129729 | 0,215693173 |  |
| 215829_at    | SHANK2          | -2,359436556 | -2,575129729 | 0,215693173 |  |
| 215965_at    | -               | -2,359436556 | -2,575129729 | 0,215693173 |  |
| 221365_at    | MLNR            | -2,359436556 | -2,575129729 | 0,215693173 |  |
| 231468_at    | SH3BP4          | -2,359436556 | -2,575129729 | 0,215693173 |  |

|              |                |              |              |             |  |
|--------------|----------------|--------------|--------------|-------------|--|
| 232840_at    | -              | -2,359436556 | -2,575129729 | 0,215693173 |  |
| 232989_s_at  | CCDC136        | -2,359436556 | -2,575129729 | 0,215693173 |  |
| 241004_at    | -              | -2,359436556 | -2,575129729 | 0,215693173 |  |
| 226537_at    | HINT3          | 2,87191078   | 2,656223838  | 0,215686942 |  |
| 1553418_a_at | CNTNAP5        | -1,399512875 | -1,615132408 | 0,215619533 |  |
| 1569751_at   | TBC1D26        | -1,399512875 | -1,615132408 | 0,215619533 |  |
| 1570307_s_at | ST18           | -1,399512875 | -1,615132408 | 0,215619533 |  |
| 203876_s_at  | MMP11          | -1,399512875 | -1,615132408 | 0,215619533 |  |
| 205666_at    | FMO1           | -1,399512875 | -1,615132408 | 0,215619533 |  |
| 205939_at    | CYP3A7         | -1,399512875 | -1,615132408 | 0,215619533 |  |
| 206568_at    | TNP1           | -1,399512875 | -1,615132408 | 0,215619533 |  |
| 207702_s_at  | MAGI2          | -1,399512875 | -1,615132408 | 0,215619533 |  |
| 210267_at    | NIPAL3         | -1,399512875 | -1,615132408 | 0,215619533 |  |
| 215805_at    | -              | -1,399512875 | -1,615132408 | 0,215619533 |  |
| 217218_at    | WAPAL          | -1,399512875 | -1,615132408 | 0,215619533 |  |
| 217439_at    | -              | -1,399512875 | -1,615132408 | 0,215619533 |  |
| 217668_at    | FAM211B        | -1,399512875 | -1,615132408 | 0,215619533 |  |
| 230841_at    | -              | -1,399512875 | -1,615132408 | 0,215619533 |  |
| 232567_at    | ARHGAP8 /// PR | -1,399512875 | -1,615132408 | 0,215619533 |  |
| 236430_at    | TMED6          | -1,399512875 | -1,615132408 | 0,215619533 |  |
| 236568_at    | CC2D1B         | -1,399512875 | -1,615132408 | 0,215619533 |  |
| 238601_at    | PHKB           | -1,399512875 | -1,615132408 | 0,215619533 |  |
| 239319_at    | -              | -1,399512875 | -1,615132408 | 0,215619533 |  |
| 217920_at    | MAN1A2         | 0,46522187   | 0,249604176  | 0,215617694 |  |
| 232639_at    | C3orf25        | 0,46522187   | 0,249604176  | 0,215617694 |  |
| 236278_at    | HIST1H3E       | 0,46522187   | 0,249604176  | 0,215617694 |  |
| 241816_at    | -              | 0,46522187   | 0,249604176  | 0,215617694 |  |
| 203379_at    | RPS6KA1        | 1,614289682  | 1,398700978  | 0,215588704 |  |
| 226352_at    | JMY            | 2,208874124  | 1,993317152  | 0,215556972 |  |
| 1555882_at   | SPIN3          | 1,496984567  | 1,281471383  | 0,215513184 |  |
| 244741_s_at  | LOC100128252   | 4,579810951  | 4,364410072  | 0,21540088  |  |
| 213305_s_at  | PPP2R5C        | 3,914869478  | 3,69948842   | 0,215381058 |  |
| 203006_at    | INPP5A         | 3,182077878  | 2,966746113  | 0,215331765 |  |
| 207114_at    | LY6G6C         | 1,191926657  | 0,976641161  | 0,215285496 |  |
| 223553_s_at  | DOK3           | 2,247975581  | 2,032717854  | 0,215257727 |  |
| 221263_s_at  | SF3B5          | 6,616929358  | 6,401715495  | 0,215213863 |  |
| 201086_x_at  | SON            | 5,2333172    | 5,018259423  | 0,215057777 |  |
| 52159_at     | HEMK1          | 1,816027445  | 1,600977874  | 0,215049571 |  |
| 1552426_a_at | TM2D3          | 4,125908304  | 3,910906416  | 0,215001888 |  |
| 241478_at    | MICALL2        | 0,853119696  | 0,638150376  | 0,21496932  |  |
| 213086_s_at  | CSNK1A1        | 5,407731636  | 5,192765587  | 0,214966049 |  |
| 212181_s_at  | NUDT4 /// NUDT | 4,74085559   | 4,525916104  | 0,214939485 |  |
| 224750_at    | RNF185         | 2,194816625  | 1,979940779  | 0,214875846 |  |
| 201017_at    | EIF1AX         | 4,414766661  | 4,199929321  | 0,214837339 |  |
| 226866_at    | ESCO1          | 3,872077355  | 3,6572547    | 0,214822655 |  |
| 200806_s_at  | HSPD1          | 7,160683365  | 6,945862192  | 0,214821172 |  |
| 228033_at    | E2F7           | 1,805273023  | 1,590454215  | 0,214818808 |  |
| 1563532_at   | HMCN2 /// LOC1 | -0,79540287  | -1,010192375 | 0,214789505 |  |
| 204966_at    | BAI2           | -0,79540287  | -1,010192375 | 0,214789505 |  |
| 210172_at    | SF1            | -0,79540287  | -1,010192375 | 0,214789505 |  |
| 211245_x_at  | KIR2DL4        | -0,79540287  | -1,010192375 | 0,214789505 |  |
| 214019_at    | -              | -0,79540287  | -1,010192375 | 0,214789505 |  |
| 215423_at    | -              | -0,79540287  | -1,010192375 | 0,214789505 |  |
| 224193_s_at  | FCRL2          | -0,79540287  | -1,010192375 | 0,214789505 |  |
| 239302_s_at  | LOC100506922   | -0,79540287  | -1,010192375 | 0,214789505 |  |
| 209538_at    | ZNF32          | 1,305306849  | 1,090553537  | 0,214753312 |  |

|              |                 |              |              |             |  |
|--------------|-----------------|--------------|--------------|-------------|--|
| 213685_at    | LOC100506963    | 1,305306849  | 1,090553537  | 0,214753312 |  |
| 218686_s_at  | RHBDF1          | 1,305306849  | 1,090553537  | 0,214753312 |  |
| 204146_at    | RAD51AP1        | 4,394921665  | 4,180180181  | 0,214741485 |  |
| 200773_x_at  | PTMA            | 7,449689616  | 7,234985302  | 0,214704314 |  |
| 202920_at    | ANK2            | 0,592200562  | 0,377530647  | 0,214669915 |  |
| 222220_s_at  | TSNAXIP1        | 0,592200562  | 0,377530647  | 0,214669915 |  |
| 202846_s_at  | LOC100505991 /  | 3,177319542  | 2,962671751  | 0,214647791 |  |
| 207223_s_at  | PTBP3           | 1,215326747  | 1,000684521  | 0,214642226 |  |
| 212323_s_at  | VPS13D          | 1,593009234  | 1,378453643  | 0,214555591 |  |
| 227757_at    | CUL4A           | 1,593009234  | 1,378453643  | 0,214555591 |  |
| 200786_at    | PSMB7           | 6,216561377  | 6,002093644  | 0,214467732 |  |
| 230724_s_at  | C11orf57        | 1,079110292  | 0,864649967  | 0,214460325 |  |
| 202494_at    | PPIE            | 2,342392905  | 2,127967638  | 0,214425267 |  |
| 1554884_at   | LOC100653079 /  | -2,823166348 | -3,037500868 | 0,21433452  |  |
| 1555435_at   | AFF4            | -2,823166348 | -3,037500868 | 0,21433452  |  |
| 1561713_at   | -               | -2,823166348 | -3,037500868 | 0,21433452  |  |
| 1569504_at   | LILRB4          | -2,823166348 | -3,037500868 | 0,21433452  |  |
| 205069_s_at  | ARHGAP26        | -2,823166348 | -3,037500868 | 0,21433452  |  |
| 215339_at    | NKTR            | -2,823166348 | -3,037500868 | 0,21433452  |  |
| 231250_at    | HOXB-AS4        | -2,823166348 | -3,037500868 | 0,21433452  |  |
| 231678_s_at  | ADH4            | -2,823166348 | -3,037500868 | 0,21433452  |  |
| 239183_at    | ANGPTL1         | -2,823166348 | -3,037500868 | 0,21433452  |  |
| 239480_at    | -               | -2,823166348 | -3,037500868 | 0,21433452  |  |
| 242182_x_at  | -               | -2,823166348 | -3,037500868 | 0,21433452  |  |
| 233334_x_at  | SLX1A /// SLX1A | 2,272723257  | 2,058399602  | 0,214323655 |  |
| 205329_s_at  | SNX4            | 2,758612869  | 2,544354523  | 0,214258346 |  |
| 1558792_x_at | AP2A1           | 0,273439642  | 0,059218869  | 0,214220773 |  |
| 210824_at    | -               | 0,273439642  | 0,059218869  | 0,214220773 |  |
| 231880_at    | FAM40B          | 2,652894659  | 2,438805127  | 0,214089532 |  |
| 239761_at    | GCNT1           | 2,102456302  | 1,888402606  | 0,214053696 |  |
| 230848_s_at  | MGA             | 2,860082603  | 2,646096941  | 0,213985662 |  |
| 1557003_at   | TTC23L          | -0,352951799 | -0,566887459 | 0,213935661 |  |
| 217597_x_at  | RAB40B          | -0,352951799 | -0,566887459 | 0,213935661 |  |
| 220433_at    | PRRG3           | -0,352951799 | -0,566887459 | 0,213935661 |  |
| 235091_at    | PDE12           | -0,352951799 | -0,566887459 | 0,213935661 |  |
| 240535_at    | -               | -0,352951799 | -0,566887459 | 0,213935661 |  |
| 201586_s_at  | SFPQ            | 5,604662362  | 5,390735672  | 0,213926689 |  |
| 229153_at    | SLC7A6OS        | 1,163336153  | 0,949447784  | 0,213888369 |  |
| 236410_x_at  | -               | 1,163336153  | 0,949447784  | 0,213888369 |  |
| 213302_at    | PFAS            | 4,249494456  | 4,035745559  | 0,213748897 |  |
| 204186_s_at  | PPID            | 4,159471171  | 3,945725977  | 0,213745194 |  |
| 217998_at    | PHLDA1          | 1,683039483  | 1,469325098  | 0,213714385 |  |
| 217436_x_at  | HLA-J           | 2,763383302  | 2,549796788  | 0,213586514 |  |
| 206184_at    | CRKL            | 1,000476627  | 0,786897721  | 0,213578906 |  |
| 223979_x_at  | FTCD            | 0,480753764  | 0,26733076   | 0,213423004 |  |
| 234403_at    | OR1I1           | 0,480753764  | 0,26733076   | 0,213423004 |  |
| 236451_at    | -               | 0,480753764  | 0,26733076   | 0,213423004 |  |
| 212426_s_at  | YWHAQ           | 6,483798578  | 6,270390628  | 0,213407949 |  |
| 202786_at    | STK39           | 0,417596971  | 0,204310755  | 0,213286215 |  |
| 205248_at    | DOPEY2          | 0,417596971  | 0,204310755  | 0,213286215 |  |
| 206347_at    | PDK3            | 0,417596971  | 0,204310755  | 0,213286215 |  |
| 1557315_a_at | -               | -0,136301282 | -0,34958478  | 0,213283498 |  |
| 214338_at    | DNAJB12         | -0,136301282 | -0,34958478  | 0,213283498 |  |
| 230699_at    | PGLS            | -0,136301282 | -0,34958478  | 0,213283498 |  |
| 238342_at    | -               | -0,136301282 | -0,34958478  | 0,213283498 |  |
| 241867_at    | -               | -0,136301282 | -0,34958478  | 0,213283498 |  |

|              |                 |              |              |             |  |
|--------------|-----------------|--------------|--------------|-------------|--|
| 242185_at    | -               | -0,136301282 | -0,34958478  | 0,213283498 |  |
| 212692_s_at  | LRBA            | 4,73358102   | 4,520382831  | 0,21319819  |  |
| 210260_s_at  | TNFAIP8         | 5,033234456  | 4,820078204  | 0,213156253 |  |
| 206141_at    | MOCS3           | 1,631786706  | 1,418668082  | 0,213118624 |  |
| 235796_at    | -               | 1,04816921   | 0,835239052  | 0,212930158 |  |
| 212845_at    | SAMD4A          | 1,318332599  | 1,105412836  | 0,212919763 |  |
| 223888_s_at  | LARS            | 1,515954005  | 1,303116084  | 0,212837921 |  |
| 223171_at    | DYM             | 2,605861638  | 2,39311332   | 0,212748318 |  |
| 203320_at    | SH2B3           | 3,591828571  | 3,379145507  | 0,212683064 |  |
| 211960_s_at  | RAB7A           | 4,690399017  | 4,477716877  | 0,21268214  |  |
| 1561995_at   | -               | -0,467091869 | -0,679763839 | 0,21267197  |  |
| 1562527_at   | LOC441666       | -0,467091869 | -0,679763839 | 0,21267197  |  |
| 206604_at    | OVOL1           | -0,467091869 | -0,679763839 | 0,21267197  |  |
| 230907_at    | GPRC5C          | -0,467091869 | -0,679763839 | 0,21267197  |  |
| 232217_at    | FAM26E          | -0,467091869 | -0,679763839 | 0,21267197  |  |
| 234417_at    | -               | -0,467091869 | -0,679763839 | 0,21267197  |  |
| 235153_at    | RNF183          | -0,467091869 | -0,679763839 | 0,21267197  |  |
| 237018_at    | -               | -0,467091869 | -0,679763839 | 0,21267197  |  |
| 244610_x_at  | -               | -0,467091869 | -0,679763839 | 0,21267197  |  |
| 210887_s_at  | EVC             | 0,606430281  | 0,393761504  | 0,212668777 |  |
| 232765_x_at  | SLC22A31        | 0,606430281  | 0,393761504  | 0,212668777 |  |
| 1559048_at   | -               | 0,917308734  | 0,704715219  | 0,212593515 |  |
| 216051_x_at  | -               | 0,917308734  | 0,704715219  | 0,212593515 |  |
| 221810_at    | RAB15           | 0,917308734  | 0,704715219  | 0,212593515 |  |
| 243370_at    | CAPRIN1         | 0,917308734  | 0,704715219  | 0,212593515 |  |
| 1556701_at   | -               | 0,133056859  | -0,079522948 | 0,212579807 |  |
| 236016_at    | SMARCE1         | 0,133056859  | -0,079522948 | 0,212579807 |  |
| 209300_s_at  | NECAP1          | 1,940595304  | 1,728030156  | 0,212565148 |  |
| 227922_x_at  | LOC441124       | 1,390002893  | 1,177496821  | 0,212506073 |  |
| 204252_at    | CDK2            | 3,738747209  | 3,526272152  | 0,212475058 |  |
| 224023_s_at  | BRK1            | 1,549482847  | 1,337086025  | 0,212396822 |  |
| 1558179_at   | ATP5J2          | 0,052199481  | -0,160136748 | 0,212336229 |  |
| 209843_s_at  | SOX10           | 0,052199481  | -0,160136748 | 0,212336229 |  |
| 210781_x_at  | GRIN1           | 0,052199481  | -0,160136748 | 0,212336229 |  |
| 226500_at    | ZBTB47          | 0,052199481  | -0,160136748 | 0,212336229 |  |
| 241934_at    | NTM             | 0,052199481  | -0,160136748 | 0,212336229 |  |
| 242858_at    | -               | 0,052199481  | -0,160136748 | 0,212336229 |  |
| 31799_at     | -               | 0,052207609  | -0,160108781 | 0,212316389 |  |
| 222500_at    | PPIL1           | 4,987757501  | 4,775482021  | 0,21227548  |  |
| 213971_s_at  | SUZ12 /// SUZ12 | 2,987866617  | 2,775606361  | 0,212260256 |  |
| 1566956_at   | OR7E104P        | 2,520143371  | 2,307890888  | 0,212252483 |  |
| 224763_at    | LOC100506548 /  | 2,520143371  | 2,307890888  | 0,212252483 |  |
| 204416_x_at  | APOC1           | 6,723026368  | 6,510843436  | 0,212182932 |  |
| 215548_s_at  | SCFD1           | 3,358484112  | 3,146317015  | 0,212167098 |  |
| 202673_at    | DPM1            | 6,200528471  | 5,988381327  | 0,212147144 |  |
| 212158_at    | SDC2            | 3,914869478  | 3,702749166  | 0,212120312 |  |
| 224789_at    | DCAF12          | 3,12638592   | 2,914267328  | 0,212118592 |  |
| 222713_s_at  | FANCF           | 1,251994932  | 1,039887232  | 0,212107701 |  |
| 218264_at    | BCCIP           | 3,943876123  | 3,731768909  | 0,212107215 |  |
| 221637_s_at  | C11orf48        | 3,824937847  | 3,6128809    | 0,212056948 |  |
| 201091_s_at  | CBX3            | 5,024981547  | 4,812929194  | 0,212052353 |  |
| 202781_s_at  | INPP5K          | 1,426552034  | 1,214517879  | 0,212034155 |  |
| 222592_s_at  | ACSL5           | 1,426552034  | 1,214517879  | 0,212034155 |  |
| 240108_at    | -               | 1,426552034  | 1,214517879  | 0,212034155 |  |
| 225101_s_at  | SNX14           | 4,056345228  | 3,844556416  | 0,211788813 |  |
| 1558821_s_at | -               | 0,291166226  | 0,079428135  | 0,211738091 |  |

|             |                |              |              |             |  |
|-------------|----------------|--------------|--------------|-------------|--|
| 231378_at   | -              | 0,291166226  | 0,079428135  | 0,211738091 |  |
| 216125_s_at | RANBP9         | 2,327437554  | 2,115788273  | 0,211649281 |  |
| 203049_s_at | TTC37          | 3,577453376  | 3,365837114  | 0,211616261 |  |
| 229025_s_at | IMMP1L         | 3,014789032  | 2,803210557  | 0,211578475 |  |
| 227522_at   | CMBL           | 5,751544329  | 5,540164491  | 0,211379837 |  |
| 201213_at   | PPP1R7         | 1,672933557  | 1,461646549  | 0,211287007 |  |
| 47530_at    | C9orf156       | 1,601914265  | 1,390636111  | 0,211278154 |  |
| 226199_at   | UPRT           | 2,382221458  | 2,170981159  | 0,211240299 |  |
| 31861_at    | IGHMBP2        | 2,415939236  | 2,204721854  | 0,211217382 |  |
| 203688_at   | PKD2           | 0,728550685  | 0,51742585   | 0,211124835 |  |
| 229332_at   | HPDL           | 1,143956113  | 0,932882274  | 0,211073839 |  |
| 201877_s_at | PPP2R5C        | 4,08266696   | 3,871608557  | 0,211058403 |  |
| 1554291_at  | UHRF1BP1L      | -2,479842156 | -2,690860744 | 0,211018588 |  |
| 1556650_at  | -              | -2,479842156 | -2,690860744 | 0,211018588 |  |
| 1559534_at  | -              | -2,479842156 | -2,690860744 | 0,211018588 |  |
| 1560678_at  | -              | -2,479842156 | -2,690860744 | 0,211018588 |  |
| 1561478_at  | LINC00560      | -2,479842156 | -2,690860744 | 0,211018588 |  |
| 1562576_at  | -              | -2,479842156 | -2,690860744 | 0,211018588 |  |
| 1562588_at  | -              | -2,479842156 | -2,690860744 | 0,211018588 |  |
| 1563098_at  | IGFN1          | -2,479842156 | -2,690860744 | 0,211018588 |  |
| 202311_s_at | COL1A1         | -2,479842156 | -2,690860744 | 0,211018588 |  |
| 206529_x_at | SLC26A4        | -2,479842156 | -2,690860744 | 0,211018588 |  |
| 210953_at   | TSC22D2        | -2,479842156 | -2,690860744 | 0,211018588 |  |
| 213913_s_at | TBC1D30        | -2,479842156 | -2,690860744 | 0,211018588 |  |
| 214159_at   | PLCE1          | -2,479842156 | -2,690860744 | 0,211018588 |  |
| 215784_at   | CD1E           | -2,479842156 | -2,690860744 | 0,211018588 |  |
| 217305_s_at | ADCY10         | -2,479842156 | -2,690860744 | 0,211018588 |  |
| 229070_at   | ADTRP          | -2,479842156 | -2,690860744 | 0,211018588 |  |
| 229475_at   | MAEL           | -2,479842156 | -2,690860744 | 0,211018588 |  |
| 230729_at   | -              | -2,479842156 | -2,690860744 | 0,211018588 |  |
| 233994_at   | -              | -2,479842156 | -2,690860744 | 0,211018588 |  |
| 238181_at   | -              | -2,479842156 | -2,690860744 | 0,211018588 |  |
| 238862_at   | MFSD4          | -2,479842156 | -2,690860744 | 0,211018588 |  |
| 238969_at   | C3orf55        | -2,479842156 | -2,690860744 | 0,211018588 |  |
| 240226_at   | -              | -2,479842156 | -2,690860744 | 0,211018588 |  |
| 241244_at   | -              | -2,479842156 | -2,690860744 | 0,211018588 |  |
| 243506_at   | C18orf42       | -2,479842156 | -2,690860744 | 0,211018588 |  |
| 244432_at   | -              | -2,479842156 | -2,690860744 | 0,211018588 |  |
| 244539_at   | -              | -2,479842156 | -2,690860744 | 0,211018588 |  |
| 209934_s_at | ATP2C1         | 1,104397092  | 0,893473268  | 0,210923824 |  |
| 203996_s_at | C21orf2        | 0,882651021  | 0,67181667   | 0,210834351 |  |
| 222316_at   | -              | 0,882651021  | 0,67181667   | 0,210834351 |  |
| 229630_s_at | WTAP           | 4,933058485  | 4,72225126   | 0,210807225 |  |
| 230448_at   | SLC38A10       | 1,40228911   | 1,191491281  | 0,210797829 |  |
| 235572_at   | SPC24          | 4,18577038   | 3,975013041  | 0,21075734  |  |
| 208738_x_at | SUMO2          | 5,744725693  | 5,533999386  | 0,210726307 |  |
| 221771_s_at | MPHOSPH8       | 2,243430036  | 2,032717854  | 0,210712182 |  |
| 201973_s_at | CCZ1 /// CCZ1B | 5,51792998   | 5,307244054  | 0,210685926 |  |
| 221270_s_at | QTRT1          | 3,771477743  | 3,560823412  | 0,210654331 |  |
| 227639_at   | PIGK           | 1,954567604  | 1,743944487  | 0,210623116 |  |
| 218760_at   | COQ6           | 1,835789711  | 1,6252386    | 0,21055111  |  |
| 202343_x_at | COX5B          | 5,470583284  | 5,260159446  | 0,210423837 |  |
| 212819_at   | ASB1           | -0,325749314 | -0,536087151 | 0,210337837 |  |
| 230409_at   | MAGI3          | -0,325749314 | -0,536087151 | 0,210337837 |  |
| 232359_at   | RDH11          | -0,325749314 | -0,536087151 | 0,210337837 |  |
| 233195_at   | DNAI1          | -0,325749314 | -0,536087151 | 0,210337837 |  |

|              |              |              |              |             |  |
|--------------|--------------|--------------|--------------|-------------|--|
| 240784_at    | NAT16        | -0,325749314 | -0,536087151 | 0,210337837 |  |
| 231411_at    | LHFP         | 0,934330293  | 0,724100169  | 0,210230124 |  |
| 212530_at    | NEK7         | 5,391902301  | 5,181707664  | 0,210194637 |  |
| 212928_at    | TSPYL4       | 3,78170256   | 3,571564634  | 0,210137926 |  |
| 1556078_at   | -            | -1,2845686   | -1,494668682 | 0,210100081 |  |
| 1556229_at   | -            | -1,2845686   | -1,494668682 | 0,210100081 |  |
| 1563106_at   | -            | -1,2845686   | -1,494668682 | 0,210100081 |  |
| 1569932_at   | NHSL2        | -1,2845686   | -1,494668682 | 0,210100081 |  |
| 206919_at    | ELK4         | -1,2845686   | -1,494668682 | 0,210100081 |  |
| 214964_at    | -            | -1,2845686   | -1,494668682 | 0,210100081 |  |
| 220804_s_at  | TP73         | -1,2845686   | -1,494668682 | 0,210100081 |  |
| 227474_at    | LOC654433    | -1,2845686   | -1,494668682 | 0,210100081 |  |
| 237686_at    | RNF219       | -1,2845686   | -1,494668682 | 0,210100081 |  |
| 242340_at    | -            | -1,2845686   | -1,494668682 | 0,210100081 |  |
| 1554749_s_at | CLCNKB       | -0,112808516 | -0,322870281 | 0,210061765 |  |
| 207835_at    | FBLN1        | -0,112808516 | -0,322870281 | 0,210061765 |  |
| 212225_at    | EIF1         | -0,112808516 | -0,322870281 | 0,210061765 |  |
| 213211_s_at  | TAF6L        | -0,112808516 | -0,322870281 | 0,210061765 |  |
| 229098_s_at  | C5orf24      | -0,112808516 | -0,322870281 | 0,210061765 |  |
| 233971_at    | FAM166A      | -0,112808516 | -0,322870281 | 0,210061765 |  |
| 234769_at    | DKFZp547J222 | -0,112808516 | -0,322870281 | 0,210061765 |  |
| 212454_x_at  | HNRPDL       | 4,285314988  | 4,075277877  | 0,210037112 |  |
| 1569652_at   | MLLT3        | 1,709647566  | 1,499637023  | 0,210010543 |  |
| 211977_at    | GPR107       | 1,709647566  | 1,499637023  | 0,210010543 |  |
| 218779_x_at  | EPS8L1       | 1,210676994  | 1,000684521  | 0,209992473 |  |
| 212890_at    | SLC38A10     | 1,339784194  | 1,129843209  | 0,209940986 |  |
| 224414_s_at  | CARD6        | 1,789769151  | 1,579853228  | 0,209915923 |  |
| 225609_at    | GSR          | 3,790298086  | 3,580454966  | 0,20984312  |  |
| 200602_at    | APP          | 3,655656719  | 3,445853256  | 0,209803463 |  |
| 226473_at    | CBX2         | 1,764611101  | 1,55481039   | 0,20980071  |  |
| 225724_at    | FLJ31306     | 2,250242994  | 2,040470494  | 0,2097725   |  |
| 201646_at    | SCARB2       | 0,627515113  | 0,417770464  | 0,209744649 |  |
| 213204_at    | CUL9         | 0,627515113  | 0,417770464  | 0,209744649 |  |
| 204306_s_at  | CD151        | 2,288253583  | 2,078620836  | 0,209632747 |  |
| 1562998_at   | -            | -3,192553003 | -3,402185466 | 0,209632463 |  |
| 1553755_at   | NXNL1        | 1,114389003  | 0,904843258  | 0,209545745 |  |
| 206519_x_at  | SIGLEC6      | 0,072842263  | -0,136643983 | 0,209486245 |  |
| 207125_at    | ZNF225       | 0,072842263  | -0,136643983 | 0,209486245 |  |
| 230092_at    | UBXN10       | 0,072842263  | -0,136643983 | 0,209486245 |  |
| 233961_at    | -            | 0,072842263  | -0,136643983 | 0,209486245 |  |
| 239687_at    | SLX4         | 0,072842263  | -0,136643983 | 0,209486245 |  |
| 227981_at    | CYB561D1     | 1,868628927  | 1,659204017  | 0,20942491  |  |
| 239159_at    | GOSR2        | 1,073999308  | 0,864649967  | 0,209349341 |  |
| 216908_x_at  | RRN3P1       | 2,688444421  | 2,479296438  | 0,209147983 |  |
| 1554860_at   | PTPN7        | -0,741668563 | -0,950686014 | 0,209017452 |  |
| 1558594_at   | ZNF219       | -0,741668563 | -0,950686014 | 0,209017452 |  |
| 217442_at    | LOC100131825 | -0,741668563 | -0,950686014 | 0,209017452 |  |
| 231185_at    | KIAA1161     | -0,741668563 | -0,950686014 | 0,209017452 |  |
| 234909_at    | -            | -0,741668563 | -0,950686014 | 0,209017452 |  |
| 235714_at    | GANC         | -0,741668563 | -0,950686014 | 0,209017452 |  |
| 244128_x_at  | GLIS1        | -0,741668563 | -0,950686014 | 0,209017452 |  |
| 244765_at    | -            | -0,741668563 | -0,950686014 | 0,209017452 |  |
| 1553397_at   | CCDC13       | 1,274448124  | 1,065442793  | 0,209005331 |  |
| 229068_at    | CCT5         | 1,274448124  | 1,065442793  | 0,209005331 |  |
| 239207_at    | KDM5C        | 1,274448124  | 1,065442793  | 0,209005331 |  |
| 202627_s_at  | SERPINE1     | 2,159061673  | 1,950068772  | 0,208992901 |  |

|              |                 |              |              |             |  |
|--------------|-----------------|--------------|--------------|-------------|--|
| 1557070_at   | LOC100130275    | -0,43775896  | -0,646746079 | 0,208987118 |  |
| 205766_at    | TCAP            | -0,43775896  | -0,646746079 | 0,208987118 |  |
| 216655_s_at  | -               | -0,43775896  | -0,646746079 | 0,208987118 |  |
| 224016_at    | HIPK2           | -0,43775896  | -0,646746079 | 0,208987118 |  |
| 231295_at    | ME3             | -0,43775896  | -0,646746079 | 0,208987118 |  |
| 238618_at    | NF2             | -0,43775896  | -0,646746079 | 0,208987118 |  |
| 243417_at    | ZADH2           | -0,43775896  | -0,646746079 | 0,208987118 |  |
| 227033_at    | PDIA3           | 1,481627361  | 1,272721751  | 0,20890561  |  |
| 227143_s_at  | BID             | 2,139623739  | 1,930732138  | 0,208891601 |  |
| 209231_s_at  | DCTN5           | 3,109000457  | 2,900133867  | 0,20886659  |  |
| 205260_s_at  | ACYP1           | 3,294008537  | 3,08516499   | 0,208843547 |  |
| 207133_x_at  | ALPK1           | 1,238353345  | 1,029536893  | 0,208816452 |  |
| 208860_s_at  | ATRX            | 2,416948786  | 2,208167653  | 0,208781133 |  |
| 219972_s_at  | C14orf135       | 3,248232277  | 3,039473081  | 0,208759196 |  |
| 223110_at    | KIAA1429        | 2,979690938  | 2,770953871  | 0,208737067 |  |
| 219495_s_at  | ZNF180          | 1,968405881  | 1,759685182  | 0,2087207   |  |
| 235573_at    | -               | 0,945567441  | 0,73688026   | 0,208687181 |  |
| 226413_at    | LOC400027       | 2,331726354  | 2,123108223  | 0,208618131 |  |
| 212930_at    | ATP2B1          | 1,314003737  | 1,105412836  | 0,208590901 |  |
| 1553112_s_at | CDK8            | 2,014487247  | 1,805902329  | 0,208584918 |  |
| 207484_s_at  | EHMT2           | 0,384950573  | 0,176436073  | 0,2085145   |  |
| 211205_x_at  | PIP5K1A         | 0,384950573  | 0,176436073  | 0,2085145   |  |
| 213703_at    | LINC00342       | 0,384950573  | 0,176436073  | 0,2085145   |  |
| 215725_at    | DGCR11          | 0,384950573  | 0,176436073  | 0,2085145   |  |
| 235397_at    | LINC00174       | 0,384950573  | 0,176436073  | 0,2085145   |  |
| 225152_at    | ZNF622          | 3,741167469  | 3,532699346  | 0,208468122 |  |
| 226163_at    | ZBTB9           | 2,637386731  | 2,428994491  | 0,20839224  |  |
| 201133_s_at  | PJA2            | 3,453052675  | 3,244672787  | 0,208379888 |  |
| 243801_x_at  | MRPL30          | 1,578645857  | 1,370274469  | 0,208371387 |  |
| 211814_s_at  | CCNE2           | 3,203298287  | 2,994948944  | 0,208349343 |  |
| 226915_s_at  | ARPC5L          | 3,279650757  | 3,071356473  | 0,208294285 |  |
| 1555812_a_at | ARHGDI          | 3,092667038  | 2,884425449  | 0,208241589 |  |
| 209424_s_at  | AMACR /// C1QT  | 0,518867317  | 0,310717132  | 0,208150185 |  |
| 221660_at    | MYL10           | 0,518867317  | 0,310717132  | 0,208150185 |  |
| 228719_at    | ZSWIM7          | 0,518867317  | 0,310717132  | 0,208150185 |  |
| 235296_at    | EIF5A2          | 0,518867317  | 0,310717132  | 0,208150185 |  |
| 241954_at    | FDFT1           | 0,518867317  | 0,310717132  | 0,208150185 |  |
| 1553190_s_at | PARD3B          | 0,317354302  | 0,109221392  | 0,20813291  |  |
| 230460_at    | MYLK-AS1        | 0,317354302  | 0,109221392  | 0,20813291  |  |
| 208161_s_at  | ABCC3           | -0,946847173 | -1,154897679 | 0,208050506 |  |
| 211430_s_at  | IGHG1 /// IGHG2 | -0,946847173 | -1,154897679 | 0,208050506 |  |
| 216471_x_at  | SSX2 /// SSX2B  | -0,946847173 | -1,154897679 | 0,208050506 |  |
| 216727_at    | STK38           | -0,946847173 | -1,154897679 | 0,208050506 |  |
| 221281_at    | SRC             | -0,946847173 | -1,154897679 | 0,208050506 |  |
| 229799_s_at  | NCAM1           | -0,946847173 | -1,154897679 | 0,208050506 |  |
| 230742_at    | RBM5            | -0,946847173 | -1,154897679 | 0,208050506 |  |
| 234809_at    | ZC4H2           | -0,946847173 | -1,154897679 | 0,208050506 |  |
| 236805_at    | C9orf96         | -0,946847173 | -1,154897679 | 0,208050506 |  |
| 238983_at    | NSUN7           | -0,946847173 | -1,154897679 | 0,208050506 |  |
| 221965_at    | MPHOSPH9        | 1,751865623  | 1,543943227  | 0,207922395 |  |
| 229794_at    | ZNF585A         | 2,640847372  | 2,432926755  | 0,207920617 |  |
| 220720_x_at  | MZT2B           | 2,206540699  | 1,998633167  | 0,207907532 |  |
| 227687_at    | HYLS1           | 2,86748657   | 2,659583735  | 0,207902835 |  |
| 1554634_at   | PDS5B           | -2,930741289 | -3,138626879 | 0,20788559  |  |
| 1555890_at   | OR2A20P /// OR2 | -2,930741289 | -3,138626879 | 0,20788559  |  |
| 1557343_at   | -               | -2,930741289 | -3,138626879 | 0,20788559  |  |



|              |                |              |              |             |  |
|--------------|----------------|--------------|--------------|-------------|--|
| 1557463_at   | -              | -2,930741289 | -3,138626879 | 0,20788559  |  |
| 1558945_s_at | LOC100507353   | -2,930741289 | -3,138626879 | 0,20788559  |  |
| 1561720_at   | RECQL5         | -2,930741289 | -3,138626879 | 0,20788559  |  |
| 1562696_at   | -              | -2,930741289 | -3,138626879 | 0,20788559  |  |
| 1564276_at   | C5orf56        | -2,930741289 | -3,138626879 | 0,20788559  |  |
| 1569995_at   | LOC152586      | -2,930741289 | -3,138626879 | 0,20788559  |  |
| 207102_at    | AKR1D1         | -2,930741289 | -3,138626879 | 0,20788559  |  |
| 211324_s_at  | RGPD3 /// RGPD | -2,930741289 | -3,138626879 | 0,20788559  |  |
| 211427_s_at  | KCNJ13         | -2,930741289 | -3,138626879 | 0,20788559  |  |
| 230804_at    | NKAPL          | -2,930741289 | -3,138626879 | 0,20788559  |  |
| 233697_at    | -              | -2,930741289 | -3,138626879 | 0,20788559  |  |
| 235892_at    | -              | -2,930741289 | -3,138626879 | 0,20788559  |  |
| 1560281_a_at | TMEM95         | 0,641402394  | 0,433557298  | 0,207845096 |  |
| 200049_at    | KAT7           | 2,626954721  | 2,419116683  | 0,207838038 |  |
| 208384_s_at  | MID2           | 0,457392764  | 0,249604176  | 0,207788589 |  |
| 222090_at    | NDUFB2-AS1     | 0,457392764  | 0,249604176  | 0,207788589 |  |
| 230186_at    | TMEM136        | 0,457392764  | 0,249604176  | 0,207788589 |  |
| 213224_s_at  | BBIP1          | 1,726031811  | 1,518263577  | 0,207768233 |  |
| 219900_s_at  | ZNF446         | 1,168140757  | 0,960386719  | 0,207754038 |  |
| 227319_at    | KLHL36         | 3,634982121  | 3,427247355  | 0,207734767 |  |
| 1554414_a_at | OSGIN2         | 2,905386372  | 2,697670403  | 0,207715969 |  |
| 226947_at    | GUSBP1 /// GUS | 2,107467633  | 1,899812471  | 0,207655162 |  |
| 201362_at    | IVNS1ABP       | 3,107750584  | 2,900133867  | 0,207616717 |  |
| 1556162_at   | IGSF3          | 1,129248302  | 0,921731975  | 0,207516327 |  |
| 202598_at    | S100A13        | 3,418185797  | 3,210719429  | 0,207466368 |  |
| 232931_at    | SNRNP200       | 1,883312263  | 1,675891488  | 0,207420775 |  |
| 235209_at    | SBSPON         | 2,427005622  | 2,21959457   | 0,207411052 |  |
| 226127_at    | ALKBH3         | 2,630440446  | 2,423075926  | 0,20736452  |  |
| 218938_at    | FBXL15         | 2,742596529  | 2,53523821   | 0,207358319 |  |
| 208784_s_at  | KLHDC3         | 2,87191078   | 2,664608955  | 0,207301826 |  |
| 222027_at    | NUCKS1         | 0,702292136  | 0,495031851  | 0,207260285 |  |
| 224974_at    | SUDS3          | 3,493810203  | 3,28656411   | 0,207246093 |  |
| 225048_at    | PHF10          | 2,478200152  | 2,271023131  | 0,207177021 |  |
| 224823_at    | MYLK           | 2,342392905  | 2,135226207  | 0,207166698 |  |
| 211696_x_at  | HBB            | 4,748093662  | 4,541024081  | 0,20706958  |  |
| 242133_s_at  | -              | 1,360921491  | 1,153866761  | 0,20705473  |  |
| 229299_at    | NADKD1         | 2,213529682  | 2,006570641  | 0,206959041 |  |
| 225060_at    | LRP11          | 3,604290432  | 3,39737216   | 0,206918272 |  |
| 238214_at    | LRRC69         | 1,732533761  | 1,525647381  | 0,206886381 |  |
| 226741_at    | SLC12A6        | 3,123915073  | 2,917077481  | 0,206837592 |  |
| 213480_at    | VAMP4          | 1,649074067  | 1,442269454  | 0,206804613 |  |
| 217780_at    | WDR83OS        | 6,455705735  | 6,248942712  | 0,206763023 |  |
| 222879_s_at  | POLH           | 0,760715727  | 0,553993624  | 0,206722102 |  |
| 214481_at    | HIST1H2AM      | 2,272723257  | 2,066015817  | 0,20670744  |  |
| 212176_at    | PNISR          | 4,017604437  | 3,810956512  | 0,206647925 |  |
| 65630_at     | TMEM80         | 1,483555976  | 1,2771032    | 0,206452776 |  |
| 226460_at    | FNIP2          | 0,962260738  | 0,755840599  | 0,206420139 |  |
| 1556988_s_at | CHD1L          | 2,890927111  | 2,684536601  | 0,206390509 |  |
| 205950_s_at  | CA1            | 6,31414113   | 6,107799886  | 0,206341244 |  |
| 209399_at    | HLCS           | 1,139070151  | 0,932882274  | 0,206187877 |  |
| 215063_x_at  | LRRC40         | 1,139070151  | 0,932882274  | 0,206187877 |  |
| 212576_at    | MGRN1          | 2,764969948  | 2,558821855  | 0,206148093 |  |
| 202534_x_at  | DHFR           | 4,124054951  | 3,917937882  | 0,206117069 |  |
| 225611_at    | MAST4          | 3,043834719  | 2,837730973  | 0,206103746 |  |
| 212726_at    | PHF2           | 1,296557217  | 1,090553537  | 0,20600368  |  |
| 210244_at    | CAMP           | 0,181384709  | -0,024572586 | 0,205957296 |  |

|              |                   |              |              |             |  |
|--------------|-------------------|--------------|--------------|-------------|--|
| 235120_at    | SEC22C            | 0,181384709  | -0,024572586 | 0,205957296 |  |
| 226238_at    | MCEE              | 1,596577845  | 1,390636111  | 0,205941734 |  |
| 227878_s_at  | ALKBH7            | 2,726400382  | 2,520531219  | 0,205869163 |  |
| 1558407_at   | PLEKHG2           | 2,05655332   | 1,85068474   | 0,20586858  |  |
| 218738_s_at  | RNF138            | 4,61586603   | 4,410008274  | 0,205857757 |  |
| 224935_at    | EIF2S3            | 5,869623654  | 5,663790168  | 0,205833486 |  |
| 1555371_at   | ABCB5             | 0,334552598  | 0,128747141  | 0,205805458 |  |
| 202039_at    | MYO18A /// TIAF   | 0,334552598  | 0,128747141  | 0,205805458 |  |
| 214253_s_at  | DTNB              | 0,334552598  | 0,128747141  | 0,205805458 |  |
| 219891_at    | PGPEP1            | 0,334552598  | 0,128747141  | 0,205805458 |  |
| 214446_at    | ELL2              | 1,261018186  | 1,055274826  | 0,20574336  |  |
| 209547_s_at  | SUGP1             | 2,536956583  | 2,331254065  | 0,205702519 |  |
| 53991_at     | DENND2A           | -1,973053164 | -2,178670297 | 0,205617133 |  |
| 204656_at    | SHB               | 1,406361373  | 1,200746069  | 0,205615304 |  |
| 201177_s_at  | UBA2              | 6,568916125  | 6,363338863  | 0,205577263 |  |
| 203276_at    | LMNB1             | 4,149180318  | 3,943660335  | 0,205519983 |  |
| 222477_s_at  | TM7SF3            | 3,381421359  | 3,175947691  | 0,205473668 |  |
| 211549_s_at  | HPGD              | 1,897847661  | 1,692388143  | 0,205459518 |  |
| 207776_s_at  | CACNB2            | -0,078265071 | -0,283667828 | 0,205402756 |  |
| 210205_at    | B3GALT4           | -0,078265071 | -0,283667828 | 0,205402756 |  |
| 1570057_x_at | -                 | -0,706943342 | -0,912331589 | 0,205388247 |  |
| 207816_at    | LALBA             | -0,706943342 | -0,912331589 | 0,205388247 |  |
| 212384_at    | ATP6V1G2-DDX      | -0,706943342 | -0,912331589 | 0,205388247 |  |
| 220126_at    | PRSS50            | -0,706943342 | -0,912331589 | 0,205388247 |  |
| 226706_at    | FLJ23867 /// QSOX | -0,706943342 | -0,912331589 | 0,205388247 |  |
| 232082_x_at  | SPRR3             | -0,706943342 | -0,912331589 | 0,205388247 |  |
| 233935_at    | TNFSF14           | -0,706943342 | -0,912331589 | 0,205388247 |  |
| 237653_at    | -                 | -0,706943342 | -0,912331589 | 0,205388247 |  |
| 238280_at    | CYB5RL            | -0,706943342 | -0,912331589 | 0,205388247 |  |
| 239414_at    | -                 | -0,706943342 | -0,912331589 | 0,205388247 |  |
| 244475_at    | -                 | -0,706943342 | -0,912331589 | 0,205388247 |  |
| 226315_at    | ZNF830            | 2,458724341  | 2,253342112  | 0,205382228 |  |
| 235089_at    | FBXL20            | 1,373456798  | 1,16809119   | 0,205365608 |  |
| 232237_at    | MDGA1             | 0,103263601  | -0,102100538 | 0,205364139 |  |
| 237249_at    | KCNQ1OT1          | 0,103263601  | -0,102100538 | 0,205364139 |  |
| 62212_at     | C1orf50 /// LOC1  | 2,082235068  | 1,876901783  | 0,205333285 |  |
| 219510_at    | POLQ              | 2,716594694  | 2,511262629  | 0,205332065 |  |
| 1553765_a_at | KLHL32            | -2,972500237 | -3,177802286 | 0,20530205  |  |
| 1556366_s_at | LY86-AS1          | -2,972500237 | -3,177802286 | 0,20530205  |  |
| 1563414_at   | -                 | -2,972500237 | -3,177802286 | 0,20530205  |  |
| 1564294_at   | -                 | -2,972500237 | -3,177802286 | 0,20530205  |  |
| 1564950_at   | -                 | -2,972500237 | -3,177802286 | 0,20530205  |  |
| 1567706_at   | -                 | -2,972500237 | -3,177802286 | 0,20530205  |  |
| 217709_at    | -                 | -2,972500237 | -3,177802286 | 0,20530205  |  |
| 220724_at    | CWH43             | -2,972500237 | -3,177802286 | 0,20530205  |  |
| 241764_at    | -                 | -2,972500237 | -3,177802286 | 0,20530205  |  |
| 213587_s_at  | ATP6V0E2          | 3,082523011  | 2,877228323  | 0,205294688 |  |
| 229420_at    | -                 | 3,689469311  | 3,484256382  | 0,205212929 |  |
| 229352_at    | SPESP1            | 2,540666392  | 2,335461563  | 0,205204828 |  |
| 212867_at    | NCOA2             | 3,375201825  | 3,170070041  | 0,205131784 |  |
| 214349_at    | CTCF              | 0,541261317  | 0,336136178  | 0,205125139 |  |
| 1555694_a_at | KCNIP3            | -0,285837228 | -0,490927335 | 0,205090107 |  |
| 207209_at    | CETN1             | -0,285837228 | -0,490927335 | 0,205090107 |  |
| 211374_x_at  | -                 | -0,285837228 | -0,490927335 | 0,205090107 |  |
| 215341_at    | DNAH6             | -0,285837228 | -0,490927335 | 0,205090107 |  |
| 230899_at    | SETD4             | -0,285837228 | -0,490927335 | 0,205090107 |  |

|              |                 |              |              |             |  |
|--------------|-----------------|--------------|--------------|-------------|--|
| 242767_at    | -               | -0,285837228 | -0,490927335 | 0,205090107 |  |
| 221770_at    | LOC729020 /// R | 3,188003814  | 2,982929462  | 0,205074351 |  |
| 1559629_at   | -               | 0,661985843  | 0,456918297  | 0,205067545 |  |
| 220078_at    | USP48           | 0,661985843  | 0,456918297  | 0,205067545 |  |
| 230871_at    | DHX30           | 0,661985843  | 0,456918297  | 0,205067545 |  |
| 1566989_at   | ARID1B          | 2,303618506  | 2,098562556  | 0,20505595  |  |
| 225641_at    | MEF2D           | 0,97328325   | 0,768343791  | 0,20493946  |  |
| 208740_at    | SAP18           | 2,663141434  | 2,458228496  | 0,204912938 |  |
| 218048_at    | COMMD3          | 3,747601714  | 3,542741726  | 0,204859987 |  |
| 211121_s_at  | DOK1            | 1,575032557  | 1,370274469  | 0,204758087 |  |
| 204822_at    | TTK             | 4,05440026   | 3,849713445  | 0,204686815 |  |
| 1555360_a_at | DNAJC11         | 2,288253583  | 2,083632167  | 0,204621416 |  |
| 235786_at    | -               | 0,82905153   | 0,624460759  | 0,204590771 |  |
| 221881_s_at  | CLIC4           | 0,928678725  | 0,724100169  | 0,204578556 |  |
| 205961_s_at  | PSIP1           | 2,842156496  | 2,637603218  | 0,204553278 |  |
| 203087_s_at  | KIF2A           | 4,705350332  | 4,500847519  | 0,204502814 |  |
| 226815_at    | TAMM41          | 1,829737795  | 1,6252386    | 0,204499195 |  |
| 215708_s_at  | LOC100653079 /  | 2,830080806  | 2,625627364  | 0,204453442 |  |
| 225131_at    | ZRANB1          | 2,931053371  | 2,726791458  | 0,204261913 |  |
| 218415_at    | VPS33B          | 1,381753566  | 1,177496821  | 0,204256746 |  |
| 225683_x_at  | PHPT1           | 1,381753566  | 1,177496821  | 0,204256746 |  |
| 227875_at    | KLHL13          | 1,381753566  | 1,177496821  | 0,204256746 |  |
| 216181_at    | SYNJ2           | 1,233777334  | 1,029536893  | 0,20424044  |  |
| 226201_at    | DOT1L           | 1,233777334  | 1,029536893  | 0,20424044  |  |
| 235384_at    | NUDT19          | 5,467663228  | 5,263475497  | 0,204187732 |  |
| 223203_at    | FAM156A /// FAM | 3,819603766  | 3,615478364  | 0,204125402 |  |
| 223785_at    | FANCI           | 1,932146506  | 1,728030156  | 0,204116349 |  |
| 36742_at     | TRIM15          | 0,273446181  | 0,069360242  | 0,204085939 |  |
| 218582_at    | 05.03.15        | 3,733084098  | 3,529030171  | 0,204053927 |  |
| 218170_at    | ISOC1           | 4,273659132  | 4,06960609   | 0,204053042 |  |
| 1562474_at   | -               | 1,485482016  | 1,281471383  | 0,204010632 |  |
| 229255_x_at  | -               | 2,134723057  | 1,930732138  | 0,203990919 |  |
| 209648_x_at  | SOCS5           | 1,348276312  | 1,144305291  | 0,203971021 |  |
| 221903_s_at  | CYLD            | 1,348276312  | 1,144305291  | 0,203971021 |  |
| 211954_s_at  | IPO5            | 5,218918276  | 5,014984123  | 0,203934154 |  |
| 1554479_a_at | CARD8           | 3,998848507  | 3,795004675  | 0,203843832 |  |
| 1553310_at   | PLB1            | -2,64318869  | -2,847001814 | 0,203813125 |  |
| 1554530_at   | VSTM2A          | -2,64318869  | -2,847001814 | 0,203813125 |  |
| 1557129_a_at | FAM111B         | -2,64318869  | -2,847001814 | 0,203813125 |  |
| 1562152_at   | -               | -2,64318869  | -2,847001814 | 0,203813125 |  |
| 1563637_at   | LOC729652       | -2,64318869  | -2,847001814 | 0,203813125 |  |
| 1564152_at   | FLJ35816        | -2,64318869  | -2,847001814 | 0,203813125 |  |
| 1566126_at   | -               | -2,64318869  | -2,847001814 | 0,203813125 |  |
| 1566441_at   | -               | -2,64318869  | -2,847001814 | 0,203813125 |  |
| 1566881_at   | -               | -2,64318869  | -2,847001814 | 0,203813125 |  |
| 1566896_at   | -               | -2,64318869  | -2,847001814 | 0,203813125 |  |
| 1566966_at   | -               | -2,64318869  | -2,847001814 | 0,203813125 |  |
| 1567376_at   | DNAH1           | -2,64318869  | -2,847001814 | 0,203813125 |  |
| 1570248_at   | -               | -2,64318869  | -2,847001814 | 0,203813125 |  |
| 1570308_at   | -               | -2,64318869  | -2,847001814 | 0,203813125 |  |
| 204414_at    | LARGE           | -2,64318869  | -2,847001814 | 0,203813125 |  |
| 205951_at    | MYH1            | -2,64318869  | -2,847001814 | 0,203813125 |  |
| 208231_at    | NRG1            | -2,64318869  | -2,847001814 | 0,203813125 |  |
| 208283_at    | GAGE1           | -2,64318869  | -2,847001814 | 0,203813125 |  |
| 211533_at    | PDGFRA          | -2,64318869  | -2,847001814 | 0,203813125 |  |
| 232712_at    | -               | -2,64318869  | -2,847001814 | 0,203813125 |  |

|              |                 |              |              |             |  |
|--------------|-----------------|--------------|--------------|-------------|--|
| 240755_at    | -               | -2,64318869  | -2,847001814 | 0,203813125 |  |
| 241824_at    | -               | -2,64318869  | -2,847001814 | 0,203813125 |  |
| 242009_at    | SLC6A4          | -2,64318869  | -2,847001814 | 0,203813125 |  |
| 242169_at    | BHMT2           | -2,64318869  | -2,847001814 | 0,203813125 |  |
| 243127_x_at  | DNASE1          | -2,64318869  | -2,847001814 | 0,203813125 |  |
| 244849_at    | SEMA3A          | -2,64318869  | -2,847001814 | 0,203813125 |  |
| 211989_at    | SMARCE1         | 3,873548912  | 3,669805237  | 0,203743674 |  |
| 225583_at    | UXS1            | 2,294858597  | 2,091116676  | 0,203741922 |  |
| 215891_s_at  | GM2A            | 1,835789711  | 1,632095957  | 0,203693754 |  |
| 1555129_at   | -               | -1,173767127 | -1,377419394 | 0,203652267 |  |
| 206353_at    | COX6A2          | -1,173767127 | -1,377419394 | 0,203652267 |  |
| 207311_at    | DOC2B           | -1,173767127 | -1,377419394 | 0,203652267 |  |
| 208211_s_at  | ALK             | -1,173767127 | -1,377419394 | 0,203652267 |  |
| 209978_s_at  | LPA /// PLG     | -1,173767127 | -1,377419394 | 0,203652267 |  |
| 212468_at    | SPAG9           | -1,173767127 | -1,377419394 | 0,203652267 |  |
| 215276_at    | WFDC8           | -1,173767127 | -1,377419394 | 0,203652267 |  |
| 217260_x_at  | IGHG1 /// SKAP2 | -1,173767127 | -1,377419394 | 0,203652267 |  |
| 223987_at    | CHRD12          | -1,173767127 | -1,377419394 | 0,203652267 |  |
| 224082_at    | -               | -1,173767127 | -1,377419394 | 0,203652267 |  |
| 236909_at    | C2orf77         | -1,173767127 | -1,377419394 | 0,203652267 |  |
| 237727_at    | -               | -1,173767127 | -1,377419394 | 0,203652267 |  |
| 238233_at    | -               | -1,173767127 | -1,377419394 | 0,203652267 |  |
| 238476_at    | CREBRF          | -1,173767127 | -1,377419394 | 0,203652267 |  |
| 239067_s_at  | PANX2           | -1,173767127 | -1,377419394 | 0,203652267 |  |
| 239144_at    | B3GAT2          | -1,173767127 | -1,377419394 | 0,203652267 |  |
| 244201_at    | -               | -1,173767127 | -1,377419394 | 0,203652267 |  |
| 218889_at    | NOC3L           | 4,863485294  | 4,659868459  | 0,203616836 |  |
| 212485_at    | GPATCH8         | 2,314494121  | 2,110887591  | 0,20360653  |  |
| 202161_at    | PKN1            | 1,912238072  | 1,708698295  | 0,203539777 |  |
| 36936_at     | TSTA3           | 4,358603002  | 4,155107399  | 0,203495603 |  |
| 226106_at    | RNF141          | 2,030406107  | 1,826973888  | 0,203432219 |  |
| 202392_s_at  | PISD            | 2,456762221  | 2,253342112  | 0,203420109 |  |
| 213753_x_at  | EIF5A           | 4,959281929  | 4,755995187  | 0,203286742 |  |
| 200934_at    | DEK             | 6,137695156  | 5,934445852  | 0,203249304 |  |
| 1554423_a_at | FBXO7           | 5,077002274  | 4,873861722  | 0,203140552 |  |
| 211395_x_at  | FCGR2C          | 2,705069849  | 2,501934108  | 0,203135741 |  |
| 223475_at    | CRISPLD1        | 2,077135162  | 1,874012195  | 0,203122967 |  |
| 226883_at    | -               | 3,981211211  | 3,778101865  | 0,203109346 |  |
| 229730_at    | SMTNL2          | 0,425644434  | 0,222599095  | 0,203045339 |  |
| 222154_s_at  | SPATS2L         | 5,286482665  | 5,083502044  | 0,202980621 |  |
| 212808_at    | NFATC2IP        | 1,079110292  | 0,876248481  | 0,202861811 |  |
| 201571_s_at  | DCTD            | 3,597182555  | 3,394350331  | 0,202832224 |  |
| 206108_s_at  | SRSF6           | 2,392522438  | 2,189694216  | 0,202828222 |  |
| 203755_at    | BUB1B           | 4,586556157  | 4,383838717  | 0,20271744  |  |
| 1556322_a_at | -               | 0,123193849  | -0,079522948 | 0,202716798 |  |
| 209546_s_at  | APOL1           | 0,123193849  | -0,079522948 | 0,202716798 |  |
| 216499_at    | -               | 0,123193849  | -0,079522948 | 0,202716798 |  |
| 222675_s_at  | BAIAP2L1        | 0,123193849  | -0,079522948 | 0,202716798 |  |
| 233103_at    | -               | 0,123193849  | -0,079522948 | 0,202716798 |  |
| 235217_at    | LOC100216546    | 0,123193849  | -0,079522948 | 0,202716798 |  |
| 213970_at    | RABL3           | 1,462198073  | 1,259496994  | 0,202701079 |  |
| 230566_at    | MORC2-AS1       | 1,462198073  | 1,259496994  | 0,202701079 |  |
| 205089_at    | ZNF7            | 3,294008537  | 3,091398163  | 0,202610374 |  |
| 227035_x_at  | RP9P            | 3,102740237  | 2,900133867  | 0,20260637  |  |
| 219077_s_at  | WWOX            | 0,496120222  | 0,293518836  | 0,202601386 |  |
| 223248_at    | HSDL1           | 2,429008604  | 2,226407528  | 0,202601076 |  |

|              |                  |              |              |             |  |
|--------------|------------------|--------------|--------------|-------------|--|
| 227613_at    | ZNF331           | 1,894952274  | 1,692388143  | 0,202564131 |  |
| 216600_x_at  | ALDOB            | 0,792179257  | 0,589657387  | 0,20252187  |  |
| 242151_at    | -                | 0,792179257  | 0,589657387  | 0,20252187  |  |
| 201273_s_at  | SRP9             | 6,935233779  | 6,732724641  | 0,202509138 |  |
| 223376_s_at  | BRI3             | 4,026230348  | 3,823741953  | 0,202488395 |  |
| 1560074_at   | PRKCA            | -0,055687482 | -0,258114234 | 0,202426752 |  |
| 1560472_at   | LOC338588        | -0,055687482 | -0,258114234 | 0,202426752 |  |
| 203413_at    | LOC100653018 /   | -0,055687482 | -0,258114234 | 0,202426752 |  |
| 204015_s_at  | DUSP4            | -0,055687482 | -0,258114234 | 0,202426752 |  |
| 208430_s_at  | DTNA             | -0,055687482 | -0,258114234 | 0,202426752 |  |
| 209701_at    | ERAP1            | -0,055687482 | -0,258114234 | 0,202426752 |  |
| 237451_x_at  | -                | -0,055687482 | -0,258114234 | 0,202426752 |  |
| 1553679_s_at | VKORC1L1         | 0,359971644  | 0,157549243  | 0,202422401 |  |
| 208791_at    | CLU              | 0,682279745  | 0,479907041  | 0,202372704 |  |
| 50965_at     | RAB26            | -0,141207927 | -0,343571477 | 0,20236355  |  |
| 213386_at    | TMEM246          | 2,208874124  | 2,006570641  | 0,202303483 |  |
| 220060_s_at  | PARBP            | 2,061726373  | 1,859476797  | 0,202249576 |  |
| 202523_s_at  | SPOCK2           | 0,209623097  | 0,007421914  | 0,202201183 |  |
| 218565_at    | C9orf114         | 0,209623097  | 0,007421914  | 0,202201183 |  |
| 227901_at    | LOC648987        | 0,209623097  | 0,007421914  | 0,202201183 |  |
| 203790_s_at  | HRSP12           | 4,73358102   | 4,531428237  | 0,202152783 |  |
| 212826_s_at  | SLC25A6          | 6,084046602  | 5,881925611  | 0,202120991 |  |
| 225823_at    | C19orf70         | 3,684447666  | 3,482360311  | 0,202087355 |  |
| 212244_at    | GCOM1 /// POLR   | 2,713311265  | 2,511262629  | 0,202048636 |  |
| 210891_s_at  | GTF2I /// GTF2IP | 5,18316972   | 4,981144321  | 0,2020254   |  |
| 225406_at    | TWSG1            | 4,176858496  | 3,975013041  | 0,201845455 |  |
| 1557848_at   | -                | -0,259832361 | -0,461594427 | 0,201762065 |  |
| 202998_s_at  | LOXL2            | -0,259832361 | -0,461594427 | 0,201762065 |  |
| 222217_s_at  | SLC27A3          | -0,259832361 | -0,461594427 | 0,201762065 |  |
| 224798_s_at  | FAM219B          | -0,259832361 | -0,461594427 | 0,201762065 |  |
| 227804_at    | TLCD1            | -0,259832361 | -0,461594427 | 0,201762065 |  |
| 228610_at    | TM9SF3           | -0,259832361 | -0,461594427 | 0,201762065 |  |
| 230450_at    | -                | -0,259832361 | -0,461594427 | 0,201762065 |  |
| 236244_at    | -                | -0,259832361 | -0,461594427 | 0,201762065 |  |
| 1554271_a_at | CENPL            | 2,213529682  | 2,011838132  | 0,20169155  |  |
| 224622_at    | TBC1D14          | 3,262904562  | 3,061230246  | 0,201674316 |  |
| 209870_s_at  | APBA2            | 2,109966786  | 1,908311039  | 0,201655747 |  |
| 201445_at    | CNN3             | 3,902669169  | 3,701119714  | 0,201549454 |  |
| 219496_at    | SOWAHC           | 1,504602299  | 1,303116084  | 0,201486214 |  |
| 230212_at    | SPRY1            | 1,504602299  | 1,303116084  | 0,201486214 |  |
| 203819_s_at  | IGF2BP3          | 2,254767157  | 2,053299695  | 0,201467462 |  |
| 224719_s_at  | C12orf57         | 4,641572531  | 4,440114107  | 0,201458424 |  |
| 236497_at    | LOC729683        | 1,215326747  | 1,013870809  | 0,201455938 |  |
| 212369_at    | ZNF384           | 2,890927111  | 2,689475799  | 0,201451312 |  |
| 225885_at    | EEA1             | 2,630440446  | 2,428994491  | 0,201445955 |  |
| 226752_at    | FAM174A          | 2,787001691  | 2,585563171  | 0,201438519 |  |
| 212461_at    | AZIN1            | 5,147729547  | 4,946319737  | 0,20140981  |  |
| 1556643_at   | LOC100507535     | 1,331241794  | 1,129843209  | 0,201398585 |  |
| 1552540_s_at | IQCD             | -0,148196756 | -0,34958478  | 0,201388024 |  |
| 1553883_at   | ZNF99            | -0,148196756 | -0,34958478  | 0,201388024 |  |
| 204323_x_at  | NF1              | -0,148196756 | -0,34958478  | 0,201388024 |  |
| 236463_at    | ADAD2            | -0,148196756 | -0,34958478  | 0,201388024 |  |
| 243178_at    | -                | -0,148196756 | -0,34958478  | 0,201388024 |  |
| 1558304_s_at | TSEN54           | 2,600539826  | 2,39915583   | 0,201383996 |  |
| 209009_at    | ESD              | 5,439623891  | 5,238417317  | 0,201206574 |  |
| 243372_at    | HSPD1            | 1,369290453  | 1,16809119   | 0,201199262 |  |

|              |                 |              |              |             |  |
|--------------|-----------------|--------------|--------------|-------------|--|
| 218968_s_at  | ZFP64           | 3,456984333  | 3,255815291  | 0,201169042 |  |
| 218458_at    | GMCL1           | 3,059434754  | 2,858346012  | 0,201088741 |  |
| 201626_at    | INSIG1          | 3,96128107   | 3,760216412  | 0,201064658 |  |
| 1558507_at   | C1orf53         | 1,177702228  | 0,976641161  | 0,201061067 |  |
| 204679_at    | KCNK1           | 1,177702228  | 0,976641161  | 0,201061067 |  |
| 228708_at    | RAB27B          | 7,312462139  | 7,111425501  | 0,201036638 |  |
| 1552491_at   | IDI2            | -1,131062212 | -1,332017329 | 0,200955117 |  |
| 1555124_at   | LOC100129726    | -1,131062212 | -1,332017329 | 0,200955117 |  |
| 214996_at    | -               | -1,131062212 | -1,332017329 | 0,200955117 |  |
| 216788_at    | -               | -1,131062212 | -1,332017329 | 0,200955117 |  |
| 219488_at    | A4GALT          | -1,131062212 | -1,332017329 | 0,200955117 |  |
| 224119_at    | -               | -1,131062212 | -1,332017329 | 0,200955117 |  |
| 228352_at    | UNC13D          | -1,131062212 | -1,332017329 | 0,200955117 |  |
| 229227_at    | DICER1-AS1      | -1,131062212 | -1,332017329 | 0,200955117 |  |
| 238809_at    | C5orf51         | -1,131062212 | -1,332017329 | 0,200955117 |  |
| 241645_at    | -               | -1,131062212 | -1,332017329 | 0,200955117 |  |
| 206052_s_at  | SLBP            | 5,382630738  | 5,181707664  | 0,200923074 |  |
| 224705_s_at  | TNRC6A          | 3,158127685  | 2,957221307  | 0,200906379 |  |
| 218234_at    | ING4            | 1,094335495  | 0,893473268  | 0,200862227 |  |
| 207396_s_at  | ALG3            | 3,231115193  | 3,030417996  | 0,200697197 |  |
| 1552946_at   | ZNF114          | 0,859074518  | 0,658444279  | 0,200630239 |  |
| 222065_s_at  | FLII            | 2,922548342  | 2,721978587  | 0,200569755 |  |
| 202528_at    | GALE            | 1,859746653  | 1,659204017  | 0,200542636 |  |
| 219698_s_at  | METTL4          | 1,780386218  | 1,579853228  | 0,20053299  |  |
| 1553528_a_at | TAF5            | 2,947914474  | 2,747463672  | 0,200450802 |  |
| 208648_at    | VCP             | 3,733084098  | 3,532699346  | 0,200384751 |  |
| 1552621_at   | POLR2J2 /// POL | 1,446464021  | 1,246149888  | 0,200314132 |  |
| 236632_at    | HHIP-AS1        | 0,57782909   | 0,377530647  | 0,200298444 |  |
| 220960_x_at  | RPL22           | 7,224239487  | 7,023947199  | 0,200292288 |  |
| 207154_at    | DIO3            | 0,376672223  | 0,176436073  | 0,20023615  |  |
| 216973_s_at  | HOXB7           | 0,376672223  | 0,176436073  | 0,20023615  |  |
| 230036_at    | SAMD9L          | 0,376672223  | 0,176436073  | 0,20023615  |  |
| 234485_at    | -               | 0,376672223  | 0,176436073  | 0,20023615  |  |
| 211946_s_at  | PRRC2C          | 5,697110194  | 5,496914678  | 0,200195516 |  |
| 201418_s_at  | SOX4            | 1,578645857  | 1,378453643  | 0,200192213 |  |
| 222968_at    | -               | 3,043834719  | 2,843651104  | 0,200183615 |  |
| 1565786_x_at | FLJ45482        | 1,481627361  | 1,281471383  | 0,200155978 |  |
| 223348_x_at  | MUM1            | 1,481627361  | 1,281471383  | 0,200155978 |  |
| 234983_at    | -               | 3,769898242  | 3,569779975  | 0,200118267 |  |
| 1552520_at   | TMEM74          | -0,366776884 | -0,566887459 | 0,200110576 |  |
| 232435_at    | ALG13           | -0,366776884 | -0,566887459 | 0,200110576 |  |
| 233381_at    | RUFY1           | -0,366776884 | -0,566887459 | 0,200110576 |  |
| 214499_s_at  | BCLAF1          | 3,715139632  | 3,515187047  | 0,199952585 |  |
| 219410_at    | TMEM45A         | 3,902669169  | 3,702749166  | 0,199920003 |  |
| 222392_x_at  | PERP            | 1,305306849  | 1,105412836  | 0,199894014 |  |
| 220255_at    | FANCE           | 1,549482847  | 1,349621332  | 0,199861515 |  |
| 222665_at    | FAM82B          | 1,549482847  | 1,349621332  | 0,199861515 |  |
| 1555792_a_at | CCDC116         | -0,655928373 | -0,855751026 | 0,199822653 |  |
| 1557744_at   | -               | -0,655928373 | -0,855751026 | 0,199822653 |  |
| 1565579_at   | -               | -0,655928373 | -0,855751026 | 0,199822653 |  |
| 205520_at    | STRN            | -0,655928373 | -0,855751026 | 0,199822653 |  |
| 207990_x_at  | ACRV1           | -0,655928373 | -0,855751026 | 0,199822653 |  |
| 208587_s_at  | OR1E1 /// OR1E2 | -0,655928373 | -0,855751026 | 0,199822653 |  |
| 216370_s_at  | TKTL1           | -0,655928373 | -0,855751026 | 0,199822653 |  |
| 220634_at    | TBX4            | -0,655928373 | -0,855751026 | 0,199822653 |  |
| 221364_at    | GRID2           | -0,655928373 | -0,855751026 | 0,199822653 |  |

|              |                   |              |              |             |  |
|--------------|-------------------|--------------|--------------|-------------|--|
| 231887_s_at  | KIAA1274          | -0,655928373 | -0,855751026 | 0,199822653 |  |
| 234462_at    | -                 | -0,655928373 | -0,855751026 | 0,199822653 |  |
| 235703_at    | PLB1              | -0,655928373 | -0,855751026 | 0,199822653 |  |
| 236403_at    | THAP7-AS1         | -0,655928373 | -0,855751026 | 0,199822653 |  |
| 238059_at    | -                 | -0,655928373 | -0,855751026 | 0,199822653 |  |
| 239538_at    | ZRANB3            | 1,965648824  | 1,765933685  | 0,19971514  |  |
| 1556969_at   | CCDC108           | -0,85085127  | -1,050406615 | 0,199555345 |  |
| 1561506_at   | -                 | -0,85085127  | -1,050406615 | 0,199555345 |  |
| 204196_x_at  | PKNOX1            | -0,85085127  | -1,050406615 | 0,199555345 |  |
| 208401_s_at  | GLP1R             | -0,85085127  | -1,050406615 | 0,199555345 |  |
| 209739_s_at  | PNPLA4            | -0,85085127  | -1,050406615 | 0,199555345 |  |
| 209842_at    | SOX10             | -0,85085127  | -1,050406615 | 0,199555345 |  |
| 210619_s_at  | HYAL1             | -0,85085127  | -1,050406615 | 0,199555345 |  |
| 216867_s_at  | PDGFA             | -0,85085127  | -1,050406615 | 0,199555345 |  |
| 220125_at    | DNAI1             | -0,85085127  | -1,050406615 | 0,199555345 |  |
| 221017_s_at  | LRRRC3            | -0,85085127  | -1,050406615 | 0,199555345 |  |
| 223541_at    | HAS3              | -0,85085127  | -1,050406615 | 0,199555345 |  |
| 224498_x_at  | AXIN2             | -0,85085127  | -1,050406615 | 0,199555345 |  |
| 232273_at    | -                 | -0,85085127  | -1,050406615 | 0,199555345 |  |
| 237325_at    | C22orf43          | -0,85085127  | -1,050406615 | 0,199555345 |  |
| 238037_at    | LMLN              | -0,85085127  | -1,050406615 | 0,199555345 |  |
| 240150_at    | -                 | -0,85085127  | -1,050406615 | 0,199555345 |  |
| 213251_at    | SMARCA5           | 4,11599613   | 3,916534328  | 0,199461802 |  |
| 1553207_at   | ARL10             | 0,30867765   | 0,109221392  | 0,199456258 |  |
| 209713_s_at  | SLC35D1           | 0,30867765   | 0,109221392  | 0,199456258 |  |
| 215022_x_at  | ZNF33B            | 0,30867765   | 0,109221392  | 0,199456258 |  |
| 217314_at    | -                 | 0,30867765   | 0,109221392  | 0,199456258 |  |
| 221224_s_at  | DCAKD             | 0,30867765   | 0,109221392  | 0,199456258 |  |
| 229737_at    | FAM46A            | 0,30867765   | 0,109221392  | 0,199456258 |  |
| 202298_at    | NDUFA1            | 5,456660079  | 5,257390237  | 0,199269842 |  |
| 218259_at    | MKL2              | 2,171078719  | 1,971855016  | 0,199223703 |  |
| 225025_at    | IGSF8             | 0,87091093   | 0,67181667   | 0,19909426  |  |
| 219376_at    | ZNF322 /// ZNF3   | 2,064305961  | 1,865308541  | 0,198997419 |  |
| 201622_at    | SND1              | 4,34540724   | 4,146452482  | 0,198954759 |  |
| 204209_at    | PCYT1A            | 1,556829052  | 1,3579181    | 0,198910952 |  |
| 222855_s_at  | TRPV2             | 1,422536444  | 1,223626587  | 0,198909857 |  |
| 227887_at    | LOC400236         | 0,152582607  | -0,046302147 | 0,198884754 |  |
| 229474_at    | MICAL3            | 0,152582607  | -0,046302147 | 0,198884754 |  |
| 237265_at    | C16orf73 /// LINC | 3,225364068  | 3,026519779  | 0,198844289 |  |
| 1559725_at   | -                 | -3,07502285  | -3,273861381 | 0,198838531 |  |
| 1561450_at   | -                 | -3,07502285  | -3,273861381 | 0,198838531 |  |
| 1562992_at   | -                 | -3,07502285  | -3,273861381 | 0,198838531 |  |
| 1568603_at   | CADPS             | -3,07502285  | -3,273861381 | 0,198838531 |  |
| 214776_x_at  | XYLB              | -3,07502285  | -3,273861381 | 0,198838531 |  |
| 232541_at    | -                 | -3,07502285  | -3,273861381 | 0,198838531 |  |
| 233755_at    | -                 | -3,07502285  | -3,273861381 | 0,198838531 |  |
| 234621_at    | -                 | -3,07502285  | -3,273861381 | 0,198838531 |  |
| 244567_at    | -                 | -3,07502285  | -3,273861381 | 0,198838531 |  |
| 202277_at    | SPTLC1            | 5,158634383  | 4,959839678  | 0,198794705 |  |
| 217847_s_at  | THRAP3            | 1,314003737  | 1,115234684  | 0,198769052 |  |
| 244046_at    | URGCP             | 1,314003737  | 1,115234684  | 0,198769052 |  |
| 1554543_at   | SPAG9             | -1,838812296 | -2,037551727 | 0,19873943  |  |
| 1555117_at   | -                 | -1,838812296 | -2,037551727 | 0,19873943  |  |
| 1555137_a_at | FGD6              | -1,838812296 | -2,037551727 | 0,19873943  |  |
| 1562288_at   | -                 | -1,838812296 | -2,037551727 | 0,19873943  |  |
| 1564310_a_at | PARP15            | -1,838812296 | -2,037551727 | 0,19873943  |  |

|              |                  |              |              |             |  |
|--------------|------------------|--------------|--------------|-------------|--|
| 1564471_at   | LOC100130815     | -1,838812296 | -2,037551727 | 0,19873943  |  |
| 1568663_a_at | PWRN2            | -1,838812296 | -2,037551727 | 0,19873943  |  |
| 1569597_at   | -                | -1,838812296 | -2,037551727 | 0,19873943  |  |
| 201496_x_at  | MYH11            | -1,838812296 | -2,037551727 | 0,19873943  |  |
| 205274_at    | GTPBP1           | -1,838812296 | -2,037551727 | 0,19873943  |  |
| 206677_at    | KRT31            | -1,838812296 | -2,037551727 | 0,19873943  |  |
| 207546_at    | ATP4B            | -1,838812296 | -2,037551727 | 0,19873943  |  |
| 213482_at    | DOCK3            | -1,838812296 | -2,037551727 | 0,19873943  |  |
| 216393_at    | C10orf12         | -1,838812296 | -2,037551727 | 0,19873943  |  |
| 216470_x_at  | PRSS2            | -1,838812296 | -2,037551727 | 0,19873943  |  |
| 216820_at    | -                | -1,838812296 | -2,037551727 | 0,19873943  |  |
| 219523_s_at  | ODZ3             | -1,838812296 | -2,037551727 | 0,19873943  |  |
| 220574_at    | SEMA6D           | -1,838812296 | -2,037551727 | 0,19873943  |  |
| 220710_at    | ANP32A-IT1       | -1,838812296 | -2,037551727 | 0,19873943  |  |
| 229228_at    | CREB5 /// LOC40  | -1,838812296 | -2,037551727 | 0,19873943  |  |
| 230140_at    | PTPN9            | -1,838812296 | -2,037551727 | 0,19873943  |  |
| 236881_at    | -                | -1,838812296 | -2,037551727 | 0,19873943  |  |
| 237063_at    | -                | -1,838812296 | -2,037551727 | 0,19873943  |  |
| 239647_at    | CHST13           | -1,838812296 | -2,037551727 | 0,19873943  |  |
| 241102_at    | -                | -1,838812296 | -2,037551727 | 0,19873943  |  |
| 241726_at    | -                | -1,838812296 | -2,037551727 | 0,19873943  |  |
| 243002_at    | -                | -1,838812296 | -2,037551727 | 0,19873943  |  |
| 227461_at    | STON2            | 4,706589309  | 4,507854821  | 0,198734488 |  |
| 1554957_at   | -                | -1,888254346 | -2,086984744 | 0,198730398 |  |
| 1555665_at   | -                | -1,888254346 | -2,086984744 | 0,198730398 |  |
| 1561277_at   | LOC339298        | -1,888254346 | -2,086984744 | 0,198730398 |  |
| 1564872_at   | -                | -1,888254346 | -2,086984744 | 0,198730398 |  |
| 1567064_at   | OR1Q1            | -1,888254346 | -2,086984744 | 0,198730398 |  |
| 204455_at    | DST /// LOC1006  | -1,888254346 | -2,086984744 | 0,198730398 |  |
| 204750_s_at  | DSC2             | -1,888254346 | -2,086984744 | 0,198730398 |  |
| 204855_at    | SERPINB5         | -1,888254346 | -2,086984744 | 0,198730398 |  |
| 204879_at    | PDPN             | -1,888254346 | -2,086984744 | 0,198730398 |  |
| 206334_at    | LIPF             | -1,888254346 | -2,086984744 | 0,198730398 |  |
| 214925_s_at  | SPTAN1           | -1,888254346 | -2,086984744 | 0,198730398 |  |
| 219115_s_at  | IL20RA           | -1,888254346 | -2,086984744 | 0,198730398 |  |
| 226900_at    | GABPB1-AS1       | -1,888254346 | -2,086984744 | 0,198730398 |  |
| 230221_at    | ABHD16A          | -1,888254346 | -2,086984744 | 0,198730398 |  |
| 232165_at    | EPPK1            | -1,888254346 | -2,086984744 | 0,198730398 |  |
| 233911_s_at  | PPM1H            | -1,888254346 | -2,086984744 | 0,198730398 |  |
| 234829_at    | C20orf57 /// DUS | -1,888254346 | -2,086984744 | 0,198730398 |  |
| 236158_at    | -                | -1,888254346 | -2,086984744 | 0,198730398 |  |
| 236245_at    | ODF3L1           | -1,888254346 | -2,086984744 | 0,198730398 |  |
| 237914_s_at  | -                | -1,888254346 | -2,086984744 | 0,198730398 |  |
| 239612_at    | LOC100240734     | -1,888254346 | -2,086984744 | 0,198730398 |  |
| 213102_at    | ACTR3            | 5,511564384  | 5,312856336  | 0,198708047 |  |
| 222869_s_at  | ELAC1            | 1,352503698  | 1,153866761  | 0,198636937 |  |
| 54051_at     | PKNOX1           | 1,390002893  | 1,191491281  | 0,198511612 |  |
| 1555337_a_at | ZNF317           | 0,822971223  | 0,624460759  | 0,198510464 |  |
| 205231_s_at  | EPM2A            | 0,822971223  | 0,624460759  | 0,198510464 |  |
| 1555485_s_at | FAM153B /// LOC  | -1,964176657 | -2,162639771 | 0,198463115 |  |
| 1556742_at   | GUSBP1           | -1,964176657 | -2,162639771 | 0,198463115 |  |
| 1559455_at   | -                | -1,964176657 | -2,162639771 | 0,198463115 |  |
| 1559481_at   | CHIC1            | -1,964176657 | -2,162639771 | 0,198463115 |  |
| 1560554_a_at | C1orf145         | -1,964176657 | -2,162639771 | 0,198463115 |  |
| 1564757_a_at | CCDC148          | -1,964176657 | -2,162639771 | 0,198463115 |  |
| 210171_s_at  | CREM             | -1,964176657 | -2,162639771 | 0,198463115 |  |



|              |              |              |              |             |  |
|--------------|--------------|--------------|--------------|-------------|--|
| 211116_at    | SLC9A2       | -1,964176657 | -2,162639771 | 0,198463115 |  |
| 215408_at    | -            | -1,964176657 | -2,162639771 | 0,198463115 |  |
| 215835_at    | LOC100653174 | -1,964176657 | -2,162639771 | 0,198463115 |  |
| 216553_x_at  | -            | -1,964176657 | -2,162639771 | 0,198463115 |  |
| 222258_s_at  | SH3BP4       | -1,964176657 | -2,162639771 | 0,198463115 |  |
| 222501_s_at  | REPIN1       | -1,964176657 | -2,162639771 | 0,198463115 |  |
| 228467_at    | PURB         | -1,964176657 | -2,162639771 | 0,198463115 |  |
| 229127_at    | JAM2         | -1,964176657 | -2,162639771 | 0,198463115 |  |
| 229756_at    | -            | -1,964176657 | -2,162639771 | 0,198463115 |  |
| 230162_s_at  | MAPK8IP3     | -1,964176657 | -2,162639771 | 0,198463115 |  |
| 230585_at    | -            | -1,964176657 | -2,162639771 | 0,198463115 |  |
| 231392_at    | -            | -1,964176657 | -2,162639771 | 0,198463115 |  |
| 233335_at    | -            | -1,964176657 | -2,162639771 | 0,198463115 |  |
| 237698_at    | -            | -1,964176657 | -2,162639771 | 0,198463115 |  |
| 237976_at    | -            | -1,964176657 | -2,162639771 | 0,198463115 |  |
| 240881_at    | -            | -1,964176657 | -2,162639771 | 0,198463115 |  |
| 241048_at    | -            | -1,964176657 | -2,162639771 | 0,198463115 |  |
| 244719_at    | -            | -1,964176657 | -2,162639771 | 0,198463115 |  |
| 244819_x_at  | PSPH         | -1,964176657 | -2,162639771 | 0,198463115 |  |
| 209940_at    | PARP3        | 0,592200562  | 0,393761504  | 0,198439057 |  |
| 209965_s_at  | RAD51D       | 0,592200562  | 0,393761504  | 0,198439057 |  |
| 231200_at    | LSM14B       | 0,592200562  | 0,393761504  | 0,198439057 |  |
| 206550_s_at  | NUP155       | 3,426229985  | 3,227795991  | 0,198433995 |  |
| 224683_at    | FBXO18       | 2,156646206  | 1,958277216  | 0,19836899  |  |
| 227685_at    | TMF1         | 2,156646206  | 1,958277216  | 0,19836899  |  |
| 1553467_at   | FLJ32742     | -1,763254337 | -1,961547147 | 0,19829281  |  |
| 1561014_at   | -            | -1,763254337 | -1,961547147 | 0,19829281  |  |
| 1566248_at   | -            | -1,763254337 | -1,961547147 | 0,19829281  |  |
| 1569108_a_at | ZNF589       | -1,763254337 | -1,961547147 | 0,19829281  |  |
| 205473_at    | ATP6V1B1     | -1,763254337 | -1,961547147 | 0,19829281  |  |
| 210302_s_at  | MAB21L2      | -1,763254337 | -1,961547147 | 0,19829281  |  |
| 211844_s_at  | NRP2         | -1,763254337 | -1,961547147 | 0,19829281  |  |
| 213456_at    | SOSTDC1      | -1,763254337 | -1,961547147 | 0,19829281  |  |
| 226129_at    | FAM83H       | -1,763254337 | -1,961547147 | 0,19829281  |  |
| 228501_at    | GALNTL2      | -1,763254337 | -1,961547147 | 0,19829281  |  |
| 234071_at    | DEPTOR       | -1,763254337 | -1,961547147 | 0,19829281  |  |
| 236604_at    | BAHCC1       | -1,763254337 | -1,961547147 | 0,19829281  |  |
| 238780_s_at  | -            | -1,763254337 | -1,961547147 | 0,19829281  |  |
| 239465_at    | -            | -1,763254337 | -1,961547147 | 0,19829281  |  |
| 240415_at    | -            | -1,763254337 | -1,961547147 | 0,19829281  |  |
| 242126_at    | -            | -1,763254337 | -1,961547147 | 0,19829281  |  |
| 244518_at    | LOC100130452 | -1,763254337 | -1,961547147 | 0,19829281  |  |
| 201193_at    | IDH1         | 3,964737003  | 3,766462619  | 0,198274384 |  |
| 215146_s_at  | TTC28        | 2,410880861  | 2,212749286  | 0,198131575 |  |
| 1563878_a_at | LOC338963    | -0,022466681 | -0,220592223 | 0,198125543 |  |
| 202449_s_at  | RXRA         | -0,022466681 | -0,220592223 | 0,198125543 |  |
| 210232_at    | CDC42        | -0,022466681 | -0,220592223 | 0,198125543 |  |
| 210743_s_at  | CDC14A       | -0,022466681 | -0,220592223 | 0,198125543 |  |
| 221095_s_at  | KCNE2        | -0,022466681 | -0,220592223 | 0,198125543 |  |
| 221136_at    | GDF2         | -0,022466681 | -0,220592223 | 0,198125543 |  |
| 223668_at    | CBLC         | -0,022466681 | -0,220592223 | 0,198125543 |  |
| 228398_at    | SENP8        | -0,022466681 | -0,220592223 | 0,198125543 |  |
| 241825_at    | TYW5         | -0,022466681 | -0,220592223 | 0,198125543 |  |
| 1553938_a_at | STK32A       | -2,756478458 | -2,954576755 | 0,198098297 |  |
| 1553965_x_at | RHOB         | -2,756478458 | -2,954576755 | 0,198098297 |  |
| 1554547_at   | FAM13C       | -2,756478458 | -2,954576755 | 0,198098297 |  |

|              |                 |              |              |             |  |
|--------------|-----------------|--------------|--------------|-------------|--|
| 1555166_a_at | ZNF396          | -2,756478458 | -2,954576755 | 0,198098297 |  |
| 1556147_at   | -               | -2,756478458 | -2,954576755 | 0,198098297 |  |
| 1556770_a_at | FBXL13          | -2,756478458 | -2,954576755 | 0,198098297 |  |
| 1557604_at   | LOC401312       | -2,756478458 | -2,954576755 | 0,198098297 |  |
| 1559289_at   | TADA1           | -2,756478458 | -2,954576755 | 0,198098297 |  |
| 1559856_s_at | MLL             | -2,756478458 | -2,954576755 | 0,198098297 |  |
| 1561488_at   | -               | -2,756478458 | -2,954576755 | 0,198098297 |  |
| 1566219_at   | LOC338651       | -2,756478458 | -2,954576755 | 0,198098297 |  |
| 1567377_at   | DNAH1           | -2,756478458 | -2,954576755 | 0,198098297 |  |
| 1568752_s_at | RGS13           | -2,756478458 | -2,954576755 | 0,198098297 |  |
| 1570043_at   | -               | -2,756478458 | -2,954576755 | 0,198098297 |  |
| 206370_at    | PIK3CG          | -2,756478458 | -2,954576755 | 0,198098297 |  |
| 210067_at    | AQP4            | -2,756478458 | -2,954576755 | 0,198098297 |  |
| 217213_at    | SLC6A2          | -2,756478458 | -2,954576755 | 0,198098297 |  |
| 220889_s_at  | CA10            | -2,756478458 | -2,954576755 | 0,198098297 |  |
| 220900_at    | -               | -2,756478458 | -2,954576755 | 0,198098297 |  |
| 232073_at    | PPFIA2          | -2,756478458 | -2,954576755 | 0,198098297 |  |
| 232568_at    | MGC24103        | -2,756478458 | -2,954576755 | 0,198098297 |  |
| 236871_s_at  | IQCF3 /// IQCF4 | -2,756478458 | -2,954576755 | 0,198098297 |  |
| 240208_at    | -               | -2,756478458 | -2,954576755 | 0,198098297 |  |
| 240366_at    | LHFPL3-AS1      | -2,756478458 | -2,954576755 | 0,198098297 |  |
| 241101_at    | -               | -2,756478458 | -2,954576755 | 0,198098297 |  |
| 241655_at    | -               | -2,756478458 | -2,954576755 | 0,198098297 |  |
| 241951_at    | SLCO1C1         | -2,756478458 | -2,954576755 | 0,198098297 |  |
| 242789_at    | PDE1A           | -2,756478458 | -2,954576755 | 0,198098297 |  |
| 243862_at    | RASEF           | -2,756478458 | -2,954576755 | 0,198098297 |  |
| 1554496_at   | RAD51B          | -2,01371626  | -2,211750327 | 0,198034067 |  |
| 1559252_a_at | -               | -2,01371626  | -2,211750327 | 0,198034067 |  |
| 1562368_at   | CARD11          | -2,01371626  | -2,211750327 | 0,198034067 |  |
| 1563635_at   | -               | -2,01371626  | -2,211750327 | 0,198034067 |  |
| 206034_at    | SERPINB8        | -2,01371626  | -2,211750327 | 0,198034067 |  |
| 206556_at    | CLUL1           | -2,01371626  | -2,211750327 | 0,198034067 |  |
| 211488_s_at  | ITGB8           | -2,01371626  | -2,211750327 | 0,198034067 |  |
| 213816_s_at  | MET             | -2,01371626  | -2,211750327 | 0,198034067 |  |
| 214725_at    | SBSPON          | -2,01371626  | -2,211750327 | 0,198034067 |  |
| 216201_at    | -               | -2,01371626  | -2,211750327 | 0,198034067 |  |
| 220876_at    | -               | -2,01371626  | -2,211750327 | 0,198034067 |  |
| 221033_s_at  | RNF17           | -2,01371626  | -2,211750327 | 0,198034067 |  |
| 227398_s_at  | MIDN            | -2,01371626  | -2,211750327 | 0,198034067 |  |
| 228858_at    | -               | -2,01371626  | -2,211750327 | 0,198034067 |  |
| 233613_x_at  | REXO2           | -2,01371626  | -2,211750327 | 0,198034067 |  |
| 234522_at    | -               | -2,01371626  | -2,211750327 | 0,198034067 |  |
| 237511_at    | -               | -2,01371626  | -2,211750327 | 0,198034067 |  |
| 237959_at    | -               | -2,01371626  | -2,211750327 | 0,198034067 |  |
| 238577_s_at  | TSHZ2           | -2,01371626  | -2,211750327 | 0,198034067 |  |
| 239745_at    | -               | -2,01371626  | -2,211750327 | 0,198034067 |  |
| 240267_at    | -               | -2,01371626  | -2,211750327 | 0,198034067 |  |
| 241324_at    | -               | -2,01371626  | -2,211750327 | 0,198034067 |  |
| 243611_at    | MICALCL         | -2,01371626  | -2,211750327 | 0,198034067 |  |
| 244073_at    | -               | -2,01371626  | -2,211750327 | 0,198034067 |  |
| 206854_s_at  | MAP3K7          | 4,127142551  | 3,92911743   | 0,198025121 |  |
| 222251_s_at  | GMEB2           | 2,446911392  | 2,248887791  | 0,198023601 |  |
| 1553564_at   | MACROD2         | 0,46522187   | 0,26733076   | 0,197891111 |  |
| 213595_s_at  | CDC42BPA        | 0,46522187   | 0,26733076   | 0,197891111 |  |
| 1558481_s_at | LOC100507032    | -1,71423189  | -1,912089812 | 0,197857922 |  |
| 1558660_at   | LOC100507059    | -1,71423189  | -1,912089812 | 0,197857922 |  |

|              |              |              |              |             |  |
|--------------|--------------|--------------|--------------|-------------|--|
| 1559692_at   | -            | -1,71423189  | -1,912089812 | 0,197857922 |  |
| 1564211_at   | C14orf64     | -1,71423189  | -1,912089812 | 0,197857922 |  |
| 1566500_at   | -            | -1,71423189  | -1,912089812 | 0,197857922 |  |
| 207456_at    | HNF4G        | -1,71423189  | -1,912089812 | 0,197857922 |  |
| 215635_at    | -            | -1,71423189  | -1,912089812 | 0,197857922 |  |
| 219759_at    | ERAP2        | -1,71423189  | -1,912089812 | 0,197857922 |  |
| 228079_at    | C3orf58      | -1,71423189  | -1,912089812 | 0,197857922 |  |
| 229261_at    | -            | -1,71423189  | -1,912089812 | 0,197857922 |  |
| 230287_at    | SGSM1        | -1,71423189  | -1,912089812 | 0,197857922 |  |
| 234874_at    | ATE1         | -1,71423189  | -1,912089812 | 0,197857922 |  |
| 235150_at    | SESN3        | -1,71423189  | -1,912089812 | 0,197857922 |  |
| 237090_at    | LOC100506113 | -1,71423189  | -1,912089812 | 0,197857922 |  |
| 237115_at    | -            | -1,71423189  | -1,912089812 | 0,197857922 |  |
| 237889_s_at  | LOC100422737 | -1,71423189  | -1,912089812 | 0,197857922 |  |
| 238930_at    | PPM1N        | -1,71423189  | -1,912089812 | 0,197857922 |  |
| 240236_at    | STXBP5L      | -1,71423189  | -1,912089812 | 0,197857922 |  |
| 240788_at    | -            | -1,71423189  | -1,912089812 | 0,197857922 |  |
| 240790_at    | -            | -1,71423189  | -1,912089812 | 0,197857922 |  |
| 218732_at    | PTRH2        | 4,238115661  | 4,040263518  | 0,197852143 |  |
| 214083_at    | PPP2R5C      | 1,073999308  | 0,876248481  | 0,197750827 |  |
| 225130_at    | ZRANB1       | 1,073999308  | 0,876248481  | 0,197750827 |  |
| 235677_at    | SRR          | 1,073999308  | 0,876248481  | 0,197750827 |  |
| 242978_x_at  | -            | 1,932146506  | 1,73441697   | 0,197729535 |  |
| 1554047_at   | TXNDC9       | 0,533835206  | 0,336136178  | 0,197699029 |  |
| 225246_at    | STIM2        | 0,533835206  | 0,336136178  | 0,197699029 |  |
| 232079_s_at  | PVRL2        | 0,533835206  | 0,336136178  | 0,197699029 |  |
| 236588_at    | CFDP1        | 0,533835206  | 0,336136178  | 0,197699029 |  |
| 209406_at    | BAG2         | 4,141261013  | 3,943660335  | 0,197600678 |  |
| 243737_at    | ATP1B4       | 2,11992033   | 1,922365006  | 0,197555323 |  |
| 226283_at    | POC1B        | 1,567778694  | 1,370274469  | 0,197504224 |  |
| 231850_x_at  | CEP44        | 1,567778694  | 1,370274469  | 0,197504224 |  |
| 202942_at    | ETFB         | 3,245961699  | 3,048471686  | 0,197490013 |  |
| 204610_s_at  | CCDC85B      | 2,646022818  | 2,448549499  | 0,19747332  |  |
| 227853_at    | -            | 2,16388051   | 1,966439221  | 0,197441289 |  |
| 200883_at    | UQCRC2       | 4,895888063  | 4,698764458  | 0,197123605 |  |
| 1559877_at   | LOC100289094 | -2,089474779 | -2,286583451 | 0,197108671 |  |
| 1560715_at   | P4HA3        | -2,089474779 | -2,286583451 | 0,197108671 |  |
| 1561059_a_at | LOC152024    | -2,089474779 | -2,286583451 | 0,197108671 |  |
| 1570388_a_at | LOC440896    | -2,089474779 | -2,286583451 | 0,197108671 |  |
| 207712_at    | BAGE         | -2,089474779 | -2,286583451 | 0,197108671 |  |
| 207857_at    | LILRA2       | -2,089474779 | -2,286583451 | 0,197108671 |  |
| 213938_at    | ERC2         | -2,089474779 | -2,286583451 | 0,197108671 |  |
| 216610_at    | SLC6A2       | -2,089474779 | -2,286583451 | 0,197108671 |  |
| 223623_at    | C2orf40      | -2,089474779 | -2,286583451 | 0,197108671 |  |
| 226545_at    | CD109        | -2,089474779 | -2,286583451 | 0,197108671 |  |
| 237596_at    | -            | -2,089474779 | -2,286583451 | 0,197108671 |  |
| 238262_at    | SPDYA        | -2,089474779 | -2,286583451 | 0,197108671 |  |
| 239405_at    | -            | -2,089474779 | -2,286583451 | 0,197108671 |  |
| 239759_at    | -            | -2,089474779 | -2,286583451 | 0,197108671 |  |
| 241963_at    | ZNF704       | -2,089474779 | -2,286583451 | 0,197108671 |  |
| 224717_s_at  | C19orf42     | 5,084646091  | 4,88753743   | 0,19710866  |  |
| 213593_s_at  | TRA2A        | 0,401366113  | 0,204310755  | 0,197055358 |  |
| 238427_at    | GRPEL2       | 0,401366113  | 0,204310755  | 0,197055358 |  |
| 227247_at    | PLEKHA8      | 3,219589925  | 3,022611001  | 0,196978925 |  |
| 212141_at    | MCM4         | 4,308891884  | 4,111917374  | 0,19697451  |  |
| 200915_x_at  | KTN1         | 5,265058615  | 5,068098141  | 0,196960475 |  |

|              |                 |              |              |             |  |
|--------------|-----------------|--------------|--------------|-------------|--|
| 214745_at    | PLCH1           | -0,221656139 | -0,41858459  | 0,196928451 |  |
| 220464_at    | MCF2L           | -0,221656139 | -0,41858459  | 0,196928451 |  |
| 221729_at    | COL5A2          | -0,221656139 | -0,41858459  | 0,196928451 |  |
| 230941_at    | LOC728537       | -0,221656139 | -0,41858459  | 0,196928451 |  |
| 212383_at    | ATP6V0A1        | 2,987866617  | 2,791007185  | 0,196859432 |  |
| 215464_s_at  | P2RX5-TAX1BP3   | 2,987866617  | 2,791007185  | 0,196859432 |  |
| 225888_at    | NAA25           | 2,822481847  | 2,625627364  | 0,196854483 |  |
| 203014_x_at  | SGSM3           | 0,888485433  | 0,691645685  | 0,196839748 |  |
| 223143_s_at  | AKIRIN2         | 1,210676994  | 1,013870809  | 0,196806185 |  |
| 200099_s_at  | RPS3A /// SNOR  | 8,147865753  | 7,951236818  | 0,196628935 |  |
| 222531_s_at  | AP5M1           | 3,582860873  | 3,386261038  | 0,196599836 |  |
| 225581_s_at  | MRPL50          | 4,608815095  | 4,412250787  | 0,196564308 |  |
| 1554057_at   | ASH1L-AS1       | 1,638726528  | 1,442269454  | 0,196457074 |  |
| 1558820_a_at | C18orf34        | 0,171847695  | -0,024572586 | 0,196420282 |  |
| 227570_at    | TMEM86A         | 0,171847695  | -0,024572586 | 0,196420282 |  |
| 228816_at    | ATP6AP1L /// FL | 0,171847695  | -0,024572586 | 0,196420282 |  |
| 1569522_at   | -               | 2,852640442  | 2,656223838  | 0,196416604 |  |
| 230434_at    | PHOSPHO2        | 0,728550685  | 0,532164371  | 0,196386315 |  |
| 234953_x_at  | ZNF19           | 0,728550685  | 0,532164371  | 0,196386315 |  |
| 218229_s_at  | POGK            | 2,654607516  | 2,458228496  | 0,196379021 |  |
| 228582_x_at  | MALAT1          | 1,442503549  | 1,246149888  | 0,19635366  |  |
| 1562946_at   | -               | -0,622910612 | -0,819238336 | 0,196327724 |  |
| 202652_at    | APBB1           | -0,622910612 | -0,819238336 | 0,196327724 |  |
| 207113_s_at  | TNF             | -0,622910612 | -0,819238336 | 0,196327724 |  |
| 211551_at    | EGFR            | -0,622910612 | -0,819238336 | 0,196327724 |  |
| 213351_s_at  | TMCC1           | -0,622910612 | -0,819238336 | 0,196327724 |  |
| 215025_at    | NTRK3           | -0,622910612 | -0,819238336 | 0,196327724 |  |
| 223283_s_at  | TSHZ1           | -0,622910612 | -0,819238336 | 0,196327724 |  |
| 231782_s_at  | KLK4            | -0,622910612 | -0,819238336 | 0,196327724 |  |
| 234881_at    | -               | -0,622910612 | -0,819238336 | 0,196327724 |  |
| 240721_at    | -               | -0,622910612 | -0,819238336 | 0,196327724 |  |
| 241339_at    | -               | -0,622910612 | -0,819238336 | 0,196327724 |  |
| 1554246_at   | C1orf210        | -2,138804305 | -2,335104118 | 0,196299813 |  |
| 1557211_a_at | FAM181A-AS1     | -2,138804305 | -2,335104118 | 0,196299813 |  |
| 1561064_a_at | -               | -2,138804305 | -2,335104118 | 0,196299813 |  |
| 1563130_a_at | -               | -2,138804305 | -2,335104118 | 0,196299813 |  |
| 1567022_at   | OR5AK4P         | -2,138804305 | -2,335104118 | 0,196299813 |  |
| 1568783_at   | SREK1           | -2,138804305 | -2,335104118 | 0,196299813 |  |
| 1570409_x_at | -               | -2,138804305 | -2,335104118 | 0,196299813 |  |
| 206164_at    | CLCA2           | -2,138804305 | -2,335104118 | 0,196299813 |  |
| 208543_at    | OR10H2          | -2,138804305 | -2,335104118 | 0,196299813 |  |
| 210669_at    | TFAP2A          | -2,138804305 | -2,335104118 | 0,196299813 |  |
| 220121_at    | LINS            | -2,138804305 | -2,335104118 | 0,196299813 |  |
| 220978_at    | KRTAP1-3        | -2,138804305 | -2,335104118 | 0,196299813 |  |
| 230831_at    | FRMD5           | -2,138804305 | -2,335104118 | 0,196299813 |  |
| 231028_at    | LOC100506082    | -2,138804305 | -2,335104118 | 0,196299813 |  |
| 232384_s_at  | -               | -2,138804305 | -2,335104118 | 0,196299813 |  |
| 233950_at    | CADPS           | -2,138804305 | -2,335104118 | 0,196299813 |  |
| 234691_at    | KRTAP2-1        | -2,138804305 | -2,335104118 | 0,196299813 |  |
| 237562_at    | -               | -2,138804305 | -2,335104118 | 0,196299813 |  |
| 237663_at    | -               | -2,138804305 | -2,335104118 | 0,196299813 |  |
| 241038_at    | -               | -2,138804305 | -2,335104118 | 0,196299813 |  |
| 241449_at    | -               | -2,138804305 | -2,335104118 | 0,196299813 |  |
| 241544_at    | -               | -2,138804305 | -2,335104118 | 0,196299813 |  |
| 241665_x_at  | -               | -2,138804305 | -2,335104118 | 0,196299813 |  |
| 243522_at    | -               | -2,138804305 | -2,335104118 | 0,196299813 |  |

|              |              |              |              |             |
|--------------|--------------|--------------|--------------|-------------|
| 244473_at    | -            | -2,138804305 | -2,335104118 | 0,196299813 |
| 244767_at    | FRA10AC1     | -2,138804305 | -2,335104118 | 0,196299813 |
| 209308_s_at  | BNIP2        | 4,188728817  | 3,992437318  | 0,196291498 |
| 1555816_at   | THSD4        | -3,114791413 | -3,311072652 | 0,196281239 |
| 1568848_at   | -            | -3,114791413 | -3,311072652 | 0,196281239 |
| 242796_x_at  | -            | -3,114791413 | -3,311072652 | 0,196281239 |
| 240066_at    | -            | 0,255492549  | 0,059218869  | 0,196273681 |
| 240383_at    | UBE2D3       | 0,255492549  | 0,059218869  | 0,196273681 |
| 240908_at    | LOC100507153 | 0,255492549  | 0,059218869  | 0,196273681 |
| 213153_at    | SETD1B       | 3,593615441  | 3,39737216   | 0,196243281 |
| 229465_s_at  | -            | 1,758252436  | 1,562009954  | 0,196242482 |
| 208352_x_at  | ANK1         | 1,512180019  | 1,315948728  | 0,196231291 |
| 227508_at    | -            | 1,512180019  | 1,315948728  | 0,196231291 |
| 217986_s_at  | BAZ1A        | 3,919150955  | 3,722963534  | 0,196187421 |
| 212469_at    | NIPBL        | 3,120200849  | 2,924079008  | 0,196121841 |
| 233562_at    | LOC84856     | 2,842156496  | 2,646096941  | 0,196059555 |
| 207483_s_at  | CAND1        | 4,153426622  | 3,957375745  | 0,196050878 |
| 213122_at    | TSPYL5       | 5,219497001  | 5,023484486  | 0,196012515 |
| 217879_at    | CDC27        | 3,611363461  | 3,415371412  | 0,19599205  |
| 224834_at    | UBTD2        | 2,132266459  | 1,936283387  | 0,195983072 |
| 227960_s_at  | FAHD1        | 2,531373922  | 2,335461563  | 0,195912359 |
| 238877_at    | EYA4         | 2,531373922  | 2,335461563  | 0,195912359 |
| 213699_s_at  | YWHAQ        | 7,080086872  | 6,884191563  | 0,195895309 |
| 203476_at    | TPBG         | 3,843828743  | 3,647981081  | 0,195847662 |
| 242224_at    | GPATCH2      | 1,089278259  | 0,893473268  | 0,195804991 |
| 1553856_s_at | P2RY10       | -1,591296941 | -1,787089803 | 0,195792862 |
| 1556090_at   | -            | -1,591296941 | -1,787089803 | 0,195792862 |
| 1562787_at   | -            | -1,591296941 | -1,787089803 | 0,195792862 |
| 1563303_at   | -            | -1,591296941 | -1,787089803 | 0,195792862 |
| 207662_at    | TBX1         | -1,591296941 | -1,787089803 | 0,195792862 |
| 207944_at    | OCM2         | -1,591296941 | -1,787089803 | 0,195792862 |
| 213791_at    | PENK         | -1,591296941 | -1,787089803 | 0,195792862 |
| 214445_at    | ELL2         | -1,591296941 | -1,787089803 | 0,195792862 |
| 224091_at    | -            | -1,591296941 | -1,787089803 | 0,195792862 |
| 232013_at    | ERCC6L2      | -1,591296941 | -1,787089803 | 0,195792862 |
| 234459_at    | PPHLN1       | -1,591296941 | -1,787089803 | 0,195792862 |
| 234524_at    | PRDM15       | -1,591296941 | -1,787089803 | 0,195792862 |
| 235929_s_at  | -            | -1,591296941 | -1,787089803 | 0,195792862 |
| 236702_at    | -            | -1,591296941 | -1,787089803 | 0,195792862 |
| 238028_at    | C6orf132     | -1,591296941 | -1,787089803 | 0,195792862 |
| 238387_s_at  | LINC00226    | -1,591296941 | -1,787089803 | 0,195792862 |
| 240650_at    | CACNA1E      | -1,591296941 | -1,787089803 | 0,195792862 |
| 240660_at    | -            | -1,591296941 | -1,787089803 | 0,195792862 |
| 242874_at    | -            | -1,591296941 | -1,787089803 | 0,195792862 |
| 243085_at    | -            | -1,591296941 | -1,787089803 | 0,195792862 |
| 244348_at    | -            | -1,591296941 | -1,787089803 | 0,195792862 |
| 224591_at    | HP1BP3       | 5,136741656  | 4,940979636  | 0,19576202  |
| 225217_s_at  | BRPF3        | 2,089851283  | 1,894118818  | 0,195732465 |
| 224210_s_at  | PXMP4        | 0,613492853  | 0,417770464  | 0,19572239  |
| 234303_s_at  | GPR85        | 2,338135744  | 2,14244844   | 0,195687304 |
| 203829_at    | ELP4         | 1,897847661  | 1,702196344  | 0,195651317 |
| 213847_at    | PRPH         | 0,67554678   | 0,479907041  | 0,195639739 |
| 219583_s_at  | SPATA7       | 0,67554678   | 0,479907041  | 0,195639739 |
| 203455_s_at  | SAT1         | 6,708412674  | 6,512818573  | 0,1955941   |
| 219557_s_at  | NRIP3        | 1,261018186  | 1,065442793  | 0,195575393 |
| 235242_at    | -            | 1,261018186  | 1,065442793  | 0,195575393 |

|              |                   |              |              |             |  |
|--------------|-------------------|--------------|--------------|-------------|--|
| 205873_at    | PIGL              | 1,339784194  | 1,144305291  | 0,195478903 |  |
| 215731_s_at  | MPHOSPH9          | 1,339784194  | 1,144305291  | 0,195478903 |  |
| 224492_s_at  | ZNF627            | 5,329069831  | 5,133591331  | 0,1954785   |  |
| 217725_x_at  | SERBP1            | 5,939611094  | 5,744220235  | 0,195390859 |  |
| 230182_at    | PDCD7             | -0,00073712  | -0,19610998  | 0,19537286  |  |
| 230726_at    | MRPL38            | -0,00073712  | -0,19610998  | 0,19537286  |  |
| 233567_at    | IPO9-AS1          | -0,00073712  | -0,19610998  | 0,19537286  |  |
| 243407_at    | MFSD8             | -0,00073712  | -0,19610998  | 0,19537286  |  |
| 205222_at    | EHHADH            | 0,900083947  | 0,704715219  | 0,195368728 |  |
| 210633_x_at  | KRT10             | 0,900083947  | 0,704715219  | 0,195368728 |  |
| 224327_s_at  | DGAT2             | 0,900083947  | 0,704715219  | 0,195368728 |  |
| 32699_s_at   | PVR               | 0,552329299  | 0,356981896  | 0,195347403 |  |
| 217743_s_at  | TMEM30A           | 4,206936942  | 4,011627006  | 0,195309936 |  |
| 222687_s_at  | ACER3             | 1,000476627  | 0,805216064  | 0,195260563 |  |
| 241246_at    | -                 | 1,000476627  | 0,805216064  | 0,195260563 |  |
| 202582_s_at  | RANBP9            | 5,150463493  | 4,95540405   | 0,195059443 |  |
| 210284_s_at  | TAB2              | 2,470441349  | 2,275409734  | 0,195031615 |  |
| 1569048_s_at | LMF1              | 0,417596971  | 0,222599095  | 0,194997876 |  |
| 227502_at    | -                 | 0,417596971  | 0,222599095  | 0,194997876 |  |
| 241757_x_at  | DYNC2LI1          | 0,417596971  | 0,222599095  | 0,194997876 |  |
| 209379_s_at  | FAM190B           | 1,454352496  | 1,259496994  | 0,194855502 |  |
| 1553094_at   | FLJ45513 /// TAC  | -1,543331864 | -1,738067356 | 0,194735492 |  |
| 1569987_at   | DLEU7-AS1         | -1,543331864 | -1,738067356 | 0,194735492 |  |
| 211120_x_at  | ESR2              | -1,543331864 | -1,738067356 | 0,194735492 |  |
| 211796_s_at  | TRBC1             | -1,543331864 | -1,738067356 | 0,194735492 |  |
| 211824_x_at  | NLRP1             | -1,543331864 | -1,738067356 | 0,194735492 |  |
| 211892_s_at  | PTGIS             | -1,543331864 | -1,738067356 | 0,194735492 |  |
| 213915_at    | NKG7              | -1,543331864 | -1,738067356 | 0,194735492 |  |
| 220348_at    | KLHL29            | -1,543331864 | -1,738067356 | 0,194735492 |  |
| 221429_x_at  | TEX13A            | -1,543331864 | -1,738067356 | 0,194735492 |  |
| 224360_s_at  | PACSIN1           | -1,543331864 | -1,738067356 | 0,194735492 |  |
| 226303_at    | PGM5              | -1,543331864 | -1,738067356 | 0,194735492 |  |
| 227419_x_at  | PLAC9             | -1,543331864 | -1,738067356 | 0,194735492 |  |
| 234203_at    | -                 | -1,543331864 | -1,738067356 | 0,194735492 |  |
| 235480_at    | LOC100506472      | -1,543331864 | -1,738067356 | 0,194735492 |  |
| 237795_s_at  | SP2               | -1,543331864 | -1,738067356 | 0,194735492 |  |
| 240825_at    | -                 | -1,543331864 | -1,738067356 | 0,194735492 |  |
| 1555888_at   | UBR5              | 0,798390451  | 0,603679647  | 0,194710804 |  |
| 235427_at    | CFLAR             | 0,798390451  | 0,603679647  | 0,194710804 |  |
| 226422_at    | ERGIC2            | 3,18563636   | 2,990953566  | 0,194682793 |  |
| 206770_s_at  | SLC35A3           | 2,637386731  | 2,442710777  | 0,194675954 |  |
| 230069_at    | SFXN1             | 2,637386731  | 2,442710777  | 0,194675954 |  |
| 212756_s_at  | UBR2              | 2,491678455  | 2,297144887  | 0,194533569 |  |
| 201167_x_at  | ARHGDI A          | 1,348276312  | 1,153866761  | 0,19440955  |  |
| 1558511_s_at | ESYT2             | 3,466766854  | 3,272369332  | 0,194397522 |  |
| 1568658_at   | C2orf74 /// KIAA1 | 2,348755185  | 2,154405725  | 0,19434946  |  |
| 209264_s_at  | TSPAN4            | 1,593009234  | 1,398700978  | 0,194308256 |  |
| 225859_at    | XIAP              | 1,593009234  | 1,398700978  | 0,194308256 |  |
| 223130_s_at  | MYLIP             | 4,931293191  | 4,737036893  | 0,194256298 |  |
| 225289_at    | STAT3             | 4,06796029   | 3,873779903  | 0,194180388 |  |
| 213119_at    | SLC36A1           | 2,102456302  | 1,908311039  | 0,194145263 |  |
| 225734_at    | FBXO22            | 2,102456302  | 1,908311039  | 0,194145263 |  |
| 223073_at    | HIATL1            | 4,027552846  | 3,833443169  | 0,194109676 |  |
| 217972_at    | CHCHD3            | 5,214280103  | 5,02022104   | 0,194059063 |  |
| 214741_at    | LOC100506639 /    | 3,416167722  | 3,222126232  | 0,194041489 |  |
| 1555832_s_at | KLF6              | 2,626954721  | 2,432926755  | 0,194027967 |  |

|              |                 |              |              |             |  |
|--------------|-----------------|--------------|--------------|-------------|--|
| 204588_s_at  | SLC7A7          | 0,273439642  | 0,079428135  | 0,194011507 |  |
| 207814_at    | DEFA6           | 0,273439642  | 0,079428135  | 0,194011507 |  |
| 234885_at    | -               | 0,273439642  | 0,079428135  | 0,194011507 |  |
| 227411_at    | WTIP            | 0,351548291  | 0,157549243  | 0,193999048 |  |
| 238694_at    | DGKE            | 0,351548291  | 0,157549243  | 0,193999048 |  |
| 242723_at    | -               | 0,351548291  | 0,157549243  | 0,193999048 |  |
| 208963_x_at  | FADS1 /// MIR19 | -0,089689931 | -0,283667828 | 0,193977896 |  |
| 220008_at    | PEAK1           | -0,089689931 | -0,283667828 | 0,193977896 |  |
| 227341_at    | BEND7           | -0,089689931 | -0,283667828 | 0,193977896 |  |
| 227965_at    | LOC100506848    | -0,089689931 | -0,283667828 | 0,193977896 |  |
| 225765_at    | TNPO1           | 4,010933848  | 3,816987307  | 0,193946541 |  |
| 226053_at    | MAP2K7          | 1,011212064  | 0,817300337  | 0,193911727 |  |
| 41387_r_at   | KDM6B           | 1,294361492  | 1,100476722  | 0,193884771 |  |
| 1566432_at   | -               | -0,196756757 | -0,39061235  | 0,193855593 |  |
| 213711_at    | KRT81           | -0,196756757 | -0,39061235  | 0,193855593 |  |
| 224264_x_at  | ZAN             | -0,196756757 | -0,39061235  | 0,193855593 |  |
| 235097_at    | TRMT44          | -0,196756757 | -0,39061235  | 0,193855593 |  |
| 239400_at    | FLJ45513        | -0,196756757 | -0,39061235  | 0,193855593 |  |
| 243663_at    | -               | -0,196756757 | -0,39061235  | 0,193855593 |  |
| 225502_at    | DOCK8           | 1,912238072  | 1,718396606  | 0,193841466 |  |
| 234752_x_at  | DMD             | -3,15396682  | -3,347710726 | 0,193743906 |  |
| 241652_x_at  | LIN7A           | -3,15396682  | -3,347710726 | 0,193743906 |  |
| 242664_at    | -               | -3,15396682  | -3,347710726 | 0,193743906 |  |
| 1556851_at   | LOC100506609    | -2,262747984 | -2,456406426 | 0,193658442 |  |
| 1557143_at   | CSMD2           | -2,262747984 | -2,456406426 | 0,193658442 |  |
| 1559462_at   | -               | -2,262747984 | -2,456406426 | 0,193658442 |  |
| 1560533_at   | -               | -2,262747984 | -2,456406426 | 0,193658442 |  |
| 1561405_s_at | CATSPER2        | -2,262747984 | -2,456406426 | 0,193658442 |  |
| 1565768_at   | ZNF268          | -2,262747984 | -2,456406426 | 0,193658442 |  |
| 1566289_at   | OR2M4           | -2,262747984 | -2,456406426 | 0,193658442 |  |
| 1566958_at   | -               | -2,262747984 | -2,456406426 | 0,193658442 |  |
| 205908_s_at  | OMD             | -2,262747984 | -2,456406426 | 0,193658442 |  |
| 207959_s_at  | DNAH9           | -2,262747984 | -2,456406426 | 0,193658442 |  |
| 209289_at    | NFIB            | -2,262747984 | -2,456406426 | 0,193658442 |  |
| 213888_s_at  | TRAF3IP3        | -2,262747984 | -2,456406426 | 0,193658442 |  |
| 221228_s_at  | -               | -2,262747984 | -2,456406426 | 0,193658442 |  |
| 221352_at    | -               | -2,262747984 | -2,456406426 | 0,193658442 |  |
| 227202_at    | CNTN1           | -2,262747984 | -2,456406426 | 0,193658442 |  |
| 231386_at    | FAM228A         | -2,262747984 | -2,456406426 | 0,193658442 |  |
| 231787_at    | SLC25A27        | -2,262747984 | -2,456406426 | 0,193658442 |  |
| 233633_at    | TBL1XR1         | -2,262747984 | -2,456406426 | 0,193658442 |  |
| 234619_at    | -               | -2,262747984 | -2,456406426 | 0,193658442 |  |
| 237102_at    | -               | -2,262747984 | -2,456406426 | 0,193658442 |  |
| 237552_at    | LOC100505817    | -2,262747984 | -2,456406426 | 0,193658442 |  |
| 241446_at    | ADAM28          | -2,262747984 | -2,456406426 | 0,193658442 |  |
| 241569_at    | -               | -2,262747984 | -2,456406426 | 0,193658442 |  |
| 243846_x_at  | -               | -2,262747984 | -2,456406426 | 0,193658442 |  |
| 244253_at    | -               | -2,262747984 | -2,456406426 | 0,193658442 |  |
| 1561504_s_at | MYLK4           | -1,026571149 | -1,220210588 | 0,193639439 |  |
| 1565581_at   | -               | -1,026571149 | -1,220210588 | 0,193639439 |  |
| 215971_at    | -               | -1,026571149 | -1,220210588 | 0,193639439 |  |
| 216172_at    | -               | -1,026571149 | -1,220210588 | 0,193639439 |  |
| 219804_at    | SYNPO2L         | -1,026571149 | -1,220210588 | 0,193639439 |  |
| 220480_at    | HAND2           | -1,026571149 | -1,220210588 | 0,193639439 |  |
| 236655_at    | TPD52           | -1,026571149 | -1,220210588 | 0,193639439 |  |
| 237430_at    | -               | -1,026571149 | -1,220210588 | 0,193639439 |  |

|              |                 |              |              |             |  |
|--------------|-----------------|--------------|--------------|-------------|--|
| 238876_at    | -               | -1,026571149 | -1,220210588 | 0,193639439 |  |
| 238998_x_at  | OTUD1           | -1,026571149 | -1,220210588 | 0,193639439 |  |
| 239671_at    | -               | -1,026571149 | -1,220210588 | 0,193639439 |  |
| 241414_at    | ANKRD10         | -1,026571149 | -1,220210588 | 0,193639439 |  |
| 212546_s_at  | FRYL            | 2,779171778  | 2,585563171  | 0,193608607 |  |
| 229099_at    | C11orf83        | 2,446911392  | 2,253342112  | 0,19356928  |  |
| 209646_x_at  | ALDH1B1         | 1,835789711  | 1,642321262  | 0,193468448 |  |
| 222212_s_at  | CERS2           | 4,102254727  | 3,908790275  | 0,193464452 |  |
| 218131_s_at  | GATAD2A         | 4,681605321  | 4,488147962  | 0,193457359 |  |
| 202900_s_at  | NUP88           | 4,302897163  | 4,109462531  | 0,193434632 |  |
| 224177_s_at  | CXorf26         | 3,456984333  | 3,263564154  | 0,193420179 |  |
| 202425_x_at  | PPP3CA          | 3,3845211    | 3,191118448  | 0,193402652 |  |
| 205354_at    | GAMT            | 1,46610492   | 1,272721751  | 0,193383169 |  |
| 233933_s_at  | OTUD5           | 1,394109935  | 1,200746069  | 0,193363866 |  |
| 219419_at    | RBFA            | 2,501229299  | 2,307890888  | 0,193338411 |  |
| 212514_x_at  | DDX3X           | 4,462972394  | 4,269747853  | 0,193224541 |  |
| 226661_at    | CDCA2           | 3,776205896  | 3,583111417  | 0,193094479 |  |
| 225517_at    | ZNF770          | 4,144312047  | 3,951219941  | 0,193092106 |  |
| 210334_x_at  | BIRC5           | 3,260656977  | 3,067567462  | 0,193089515 |  |
| 200942_s_at  | HSBP1           | 4,818544611  | 4,625489401  | 0,19305521  |  |
| 202762_at    | ROCK2           | 3,166555554  | 2,973511251  | 0,193044304 |  |
| 202950_at    | CRYZ            | 3,155710652  | 2,962671751  | 0,193038901 |  |
| 228763_at    | MDP1 /// NEDD8  | 2,35929703   | 2,166264721  | 0,193032308 |  |
| 1557352_at   | SQLE            | 0,503742507  | 0,310717132  | 0,193025375 |  |
| 204184_s_at  | ADRBK2          | 0,503742507  | 0,310717132  | 0,193025375 |  |
| 232195_at    | GPR158          | 0,503742507  | 0,310717132  | 0,193025375 |  |
| 227725_at    | ST6GALNAC1      | 2,320980353  | 2,127967638  | 0,193012715 |  |
| 223017_at    | TXNDC12         | 4,495830712  | 4,302892559  | 0,192938153 |  |
| 227288_at    | SREK1IP1        | 3,199783157  | 3,006869115  | 0,192914042 |  |
| 224866_at    | FAR1            | 4,19991587   | 4,007018329  | 0,192897541 |  |
| 212670_at    | ELN             | 0,20027154   | 0,007421914  | 0,192849626 |  |
| 219025_at    | CD248           | 0,20027154   | 0,007421914  | 0,192849626 |  |
| 230778_at    | -               | 0,20027154   | 0,007421914  | 0,192849626 |  |
| 240311_at    | NANOS3          | 0,20027154   | 0,007421914  | 0,192849626 |  |
| 242377_x_at  | THUMPD3         | 1,360921491  | 1,16809119   | 0,192830301 |  |
| 214472_at    | HIST1H2AD /// H | 4,371158382  | 4,17842456   | 0,192733823 |  |
| 1557521_a_at | -               | 1,699726954  | 1,507116528  | 0,192610427 |  |
| 1564511_a_at | FSTL4           | -1,470833215 | -1,663414495 | 0,192581279 |  |
| 1568625_at   | LOC100505997    | -1,470833215 | -1,663414495 | 0,192581279 |  |
| 1569665_at   | -               | -1,470833215 | -1,663414495 | 0,192581279 |  |
| 205554_s_at  | DNASE1L3        | -1,470833215 | -1,663414495 | 0,192581279 |  |
| 206946_at    | HCN4            | -1,470833215 | -1,663414495 | 0,192581279 |  |
| 207049_at    | SCN8A           | -1,470833215 | -1,663414495 | 0,192581279 |  |
| 208256_at    | EFNA2           | -1,470833215 | -1,663414495 | 0,192581279 |  |
| 213966_at    | HMG20B          | -1,470833215 | -1,663414495 | 0,192581279 |  |
| 216133_at    | YME1L1          | -1,470833215 | -1,663414495 | 0,192581279 |  |
| 217257_at    | SH3BP2          | -1,470833215 | -1,663414495 | 0,192581279 |  |
| 223862_at    | GHRL            | -1,470833215 | -1,663414495 | 0,192581279 |  |
| 227635_at    | RBBP6           | -1,470833215 | -1,663414495 | 0,192581279 |  |
| 229788_s_at  | -               | -1,470833215 | -1,663414495 | 0,192581279 |  |
| 230627_at    | -               | -1,470833215 | -1,663414495 | 0,192581279 |  |
| 231076_at    | C16orf82        | -1,470833215 | -1,663414495 | 0,192581279 |  |
| 235637_s_at  | -               | -1,470833215 | -1,663414495 | 0,192581279 |  |
| 236038_at    | -               | -1,470833215 | -1,663414495 | 0,192581279 |  |
| 239358_at    | -               | -1,470833215 | -1,663414495 | 0,192581279 |  |
| 239546_at    | LOC100131053    | -1,470833215 | -1,663414495 | 0,192581279 |  |



|              |           |              |              |             |  |
|--------------|-----------|--------------|--------------|-------------|--|
| 240424_s_at  | LOC441204 | -1,470833215 | -1,663414495 | 0,192581279 |  |
| 240444_x_at  | CLIP1     | -1,470833215 | -1,663414495 | 0,192581279 |  |
| 243590_at    | -         | -1,470833215 | -1,663414495 | 0,192581279 |  |
| 205018_s_at  | MBNL2     | 2,400710591  | 2,208167653  | 0,192542939 |  |
| 229431_at    | RFXAP     | 2,400710591  | 2,208167653  | 0,192542939 |  |
| 228157_at    | ZNF207    | 2,382221458  | 2,189694216  | 0,192527241 |  |
| 227335_at    | DIDO1     | 1,542099044  | 1,349621332  | 0,192477712 |  |
| 225959_s_at  | ZNRF1     | 2,774453351  | 2,582026171  | 0,19242718  |  |
| 1552359_at   | MCMDC2    | -2,311268652 | -2,503677622 | 0,192408971 |  |
| 1557755_at   | CEP128    | -2,311268652 | -2,503677622 | 0,192408971 |  |
| 1564945_at   | TBX20     | -2,311268652 | -2,503677622 | 0,192408971 |  |
| 1568656_at   | -         | -2,311268652 | -2,503677622 | 0,192408971 |  |
| 203698_s_at  | FRZB      | -2,311268652 | -2,503677622 | 0,192408971 |  |
| 207579_at    | MAGEB3    | -2,311268652 | -2,503677622 | 0,192408971 |  |
| 211368_s_at  | CASP1     | -2,311268652 | -2,503677622 | 0,192408971 |  |
| 214912_at    | -         | -2,311268652 | -2,503677622 | 0,192408971 |  |
| 216012_at    | -         | -2,311268652 | -2,503677622 | 0,192408971 |  |
| 216173_at    | -         | -2,311268652 | -2,503677622 | 0,192408971 |  |
| 217075_x_at  | MLL4      | -2,311268652 | -2,503677622 | 0,192408971 |  |
| 234115_s_at  | ZNRD1     | -2,311268652 | -2,503677622 | 0,192408971 |  |
| 238286_at    | -         | -2,311268652 | -2,503677622 | 0,192408971 |  |
| 238304_at    | -         | -2,311268652 | -2,503677622 | 0,192408971 |  |
| 238361_s_at  | -         | -2,311268652 | -2,503677622 | 0,192408971 |  |
| 238755_at    | RASSF10   | -2,311268652 | -2,503677622 | 0,192408971 |  |
| 239636_at    | MCF2L     | -2,311268652 | -2,503677622 | 0,192408971 |  |
| 244146_at    | DTWD1     | -2,311268652 | -2,503677622 | 0,192408971 |  |
| 1558046_x_at | LOC389906 | 0,760715727  | 0,568365095  | 0,192350631 |  |
| 1568640_at   | PCBP1-AS1 | 0,760715727  | 0,568365095  | 0,192350631 |  |
| 227138_at    | CRTAP     | 0,760715727  | 0,568365095  | 0,192350631 |  |
| 219766_at    | B9D2      | 1,247462054  | 1,055274826  | 0,192187228 |  |
| 227903_x_at  | TPGS1     | 1,247462054  | 1,055274826  | 0,192187228 |  |
| 224917_at    | MIR21     | 3,825698252  | 3,633530837  | 0,192167415 |  |
| 216048_s_at  | RHOBTB3   | 4,232392431  | 4,040263518  | 0,192128913 |  |
| 1554052_at   | CNOT1     | 1,926486359  | 1,73441697   | 0,192069389 |  |
| 213138_at    | ARID5A    | 0,44160593   | 0,249604176  | 0,192001754 |  |
| 222191_s_at  | B4GALT7   | 0,44160593   | 0,249604176  | 0,192001754 |  |
| 226592_at    | ZNF618    | 0,44160593   | 0,249604176  | 0,192001754 |  |
| 236905_at    | -         | 0,44160593   | 0,249604176  | 0,192001754 |  |
| 207786_at    | CYP2R1    | 1,027166904  | 0,835239052  | 0,191927852 |  |
| 209044_x_at  | SF3B4     | 4,125908304  | 3,933981372  | 0,191926932 |  |
| 214635_at    | CLDN9     | -0,299034815 | -0,490927335 | 0,19189252  |  |
| 237713_at    | -         | -0,299034815 | -0,490927335 | 0,19189252  |  |
| 235728_at    | ZFP3      | 1,735773781  | 1,543943227  | 0,191830553 |  |
| 203163_at    | KATNB1    | 1,369290453  | 1,177496821  | 0,191793632 |  |
| 227268_at    | RNFT1     | 2,876321464  | 2,684536601  | 0,191784863 |  |
| 212893_at    | ZZZ3      | 2,979690938  | 2,787940144  | 0,191750794 |  |
| 212780_at    | SOS1      | 2,369762403  | 2,17802703   | 0,191735372 |  |
| 219572_at    | CADPS2    | 2,369762403  | 2,17802703   | 0,191735372 |  |
| 201156_s_at  | RAB5C     | 3,89689195   | 3,705189898  | 0,191702052 |  |
| 244447_at    | -         | 2,630440446  | 2,438805127  | 0,191635319 |  |
| 201053_s_at  | PSMF1     | 3,981211211  | 3,789647959  | 0,191563252 |  |
| 221505_at    | ANP32E    | 5,204228009  | 5,01268698   | 0,191541029 |  |
| 213147_at    | HOXA10    | 1,168140757  | 0,976641161  | 0,191499596 |  |
| 236475_at    | MICAL2    | 1,168140757  | 0,976641161  | 0,191499596 |  |
| 204353_s_at  | POT1      | 3,211467103  | 3,019999252  | 0,19146785  |  |
| 203522_at    | CCS       | 1,982112682  | 1,790660532  | 0,19145215  |  |

|              |                  |              |              |             |  |
|--------------|------------------|--------------|--------------|-------------|--|
| 221984_s_at  | FAM134A          | 3,101484927  | 2,910041809  | 0,191443118 |  |
| 203801_at    | MRPS14           | 0,03125738   | -0,160136748 | 0,191394128 |  |
| 230704_s_at  | ITGB4            | 0,03125738   | -0,160136748 | 0,191394128 |  |
| 228670_at    | TEP1             | 0,648296226  | 0,456918297  | 0,191377928 |  |
| 236605_at    | EIF3K            | 0,648296226  | 0,456918297  | 0,191377928 |  |
| 238596_at    | FRA10AC1         | 0,648296226  | 0,456918297  | 0,191377928 |  |
| 240286_at    | -                | 1,191926657  | 1,000684521  | 0,191242136 |  |
| 205967_at    | HIST1H4A /// HIS | 4,496785894  | 4,305575871  | 0,191210023 |  |
| 1557121_s_at | -                | 1,296557217  | 1,105412836  | 0,191144381 |  |
| 209023_s_at  | STAG2            | 1,799091453  | 1,60795124   | 0,191140214 |  |
| 223204_at    | FAM198B          | 2,466546243  | 2,275409734  | 0,191136509 |  |
| 218023_s_at  | FAM53C           | 3,266269388  | 3,075135559  | 0,191133829 |  |
| 1553235_at   | PCDHAC1          | -0,423248115 | -0,614371577 | 0,191123461 |  |
| 1562030_at   | LOC284898        | -0,423248115 | -0,614371577 | 0,191123461 |  |
| 1566249_at   | -                | -0,423248115 | -0,614371577 | 0,191123461 |  |
| 206814_at    | NGF              | -0,423248115 | -0,614371577 | 0,191123461 |  |
| 207998_s_at  | CACNA1D          | -0,423248115 | -0,614371577 | 0,191123461 |  |
| 215899_at    | -                | -0,423248115 | -0,614371577 | 0,191123461 |  |
| 217208_s_at  | DLG1             | -0,423248115 | -0,614371577 | 0,191123461 |  |
| 222082_at    | ZBTB7A           | -0,423248115 | -0,614371577 | 0,191123461 |  |
| 228579_at    | KCNQ3            | -0,423248115 | -0,614371577 | 0,191123461 |  |
| 234573_at    | -                | -0,423248115 | -0,614371577 | 0,191123461 |  |
| 244110_at    | MLL              | -0,423248115 | -0,614371577 | 0,191123461 |  |
| 1554872_a_at | HMGCLL1          | -1,424023738 | -1,615132408 | 0,191108669 |  |
| 1566873_at   | -                | -1,424023738 | -1,615132408 | 0,191108669 |  |
| 206206_at    | CD180            | -1,424023738 | -1,615132408 | 0,191108669 |  |
| 206856_at    | LILRB5           | -1,424023738 | -1,615132408 | 0,191108669 |  |
| 207502_at    | GUCA2B           | -1,424023738 | -1,615132408 | 0,191108669 |  |
| 212029_s_at  | -                | -1,424023738 | -1,615132408 | 0,191108669 |  |
| 216569_at    | -                | -1,424023738 | -1,615132408 | 0,191108669 |  |
| 217418_x_at  | MS4A1            | -1,424023738 | -1,615132408 | 0,191108669 |  |
| 220100_at    | SLC22A11         | -1,424023738 | -1,615132408 | 0,191108669 |  |
| 220959_s_at  | OBP2A /// OBP2E  | -1,424023738 | -1,615132408 | 0,191108669 |  |
| 221321_s_at  | KCNIP2           | -1,424023738 | -1,615132408 | 0,191108669 |  |
| 229635_at    | LOC100505702     | -1,424023738 | -1,615132408 | 0,191108669 |  |
| 230747_s_at  | TTC39C           | -1,424023738 | -1,615132408 | 0,191108669 |  |
| 232005_at    | DNAH1            | -1,424023738 | -1,615132408 | 0,191108669 |  |
| 233669_s_at  | TRIM54           | -1,424023738 | -1,615132408 | 0,191108669 |  |
| 234624_at    | -                | -1,424023738 | -1,615132408 | 0,191108669 |  |
| 234907_x_at  | POLB             | -1,424023738 | -1,615132408 | 0,191108669 |  |
| 237801_at    | -                | -1,424023738 | -1,615132408 | 0,191108669 |  |
| 244068_at    | -                | -1,424023738 | -1,615132408 | 0,191108669 |  |
| 208232_x_at  | NRG1             | -0,759588698 | -0,950686014 | 0,191097316 |  |
| 210064_s_at  | UPK1B            | -0,759588698 | -0,950686014 | 0,191097316 |  |
| 216011_at    | SLC39A9          | -0,759588698 | -0,950686014 | 0,191097316 |  |
| 217654_at    | CFLAR            | -0,759588698 | -0,950686014 | 0,191097316 |  |
| 228837_at    | TCF4             | -0,759588698 | -0,950686014 | 0,191097316 |  |
| 230597_at    | SLC7A3           | -0,759588698 | -0,950686014 | 0,191097316 |  |
| 230932_at    | -                | -0,759588698 | -0,950686014 | 0,191097316 |  |
| 231216_at    | TMEM179          | -0,759588698 | -0,950686014 | 0,191097316 |  |
| 232143_at    | DNM1P41          | -0,759588698 | -0,950686014 | 0,191097316 |  |
| 239684_at    | -                | -0,759588698 | -0,950686014 | 0,191097316 |  |
| 239922_at    | CCDC142          | -0,759588698 | -0,950686014 | 0,191097316 |  |
| 240748_at    | -                | -0,759588698 | -0,950686014 | 0,191097316 |  |
| 240998_at    | -                | -0,759588698 | -0,950686014 | 0,191097316 |  |
| 241887_at    | UBE2W            | -0,759588698 | -0,950686014 | 0,191097316 |  |

|              |                 |              |              |             |  |
|--------------|-----------------|--------------|--------------|-------------|--|
| 243699_at    | LOC100507006    | -0,759588698 | -0,950686014 | 0,191097316 |  |
| 244296_at    | -               | -0,759588698 | -0,950686014 | 0,191097316 |  |
| 1564224_x_at | C1RL-AS1        | -0,57445847  | -0,765504029 | 0,191045559 |  |
| 208592_s_at  | CD1E            | -0,57445847  | -0,765504029 | 0,191045559 |  |
| 209855_s_at  | KLK2            | -0,57445847  | -0,765504029 | 0,191045559 |  |
| 210411_s_at  | GRIN2B          | -0,57445847  | -0,765504029 | 0,191045559 |  |
| 229092_at    | NR2F2           | -0,57445847  | -0,765504029 | 0,191045559 |  |
| 233599_at    | LOC728061       | -0,57445847  | -0,765504029 | 0,191045559 |  |
| 236139_at    | -               | -0,57445847  | -0,765504029 | 0,191045559 |  |
| 237065_s_at  | -               | -0,57445847  | -0,765504029 | 0,191045559 |  |
| 238826_x_at  | -               | -0,57445847  | -0,765504029 | 0,191045559 |  |
| 240484_at    | -               | -0,57445847  | -0,765504029 | 0,191045559 |  |
| 242726_at    | -               | -0,57445847  | -0,765504029 | 0,191045559 |  |
| 242769_at    | -               | -0,57445847  | -0,765504029 | 0,191045559 |  |
| 220285_at    | FAM108B1        | 1,485482016  | 1,294497133  | 0,190984883 |  |
| 227244_s_at  | -               | 0,82905153   | 0,638150376  | 0,190901154 |  |
| 229391_s_at  | FAM26F          | 0,82905153   | 0,638150376  | 0,190901154 |  |
| 214042_s_at  | RPL22           | 5,337225169  | 5,146370538  | 0,19085463  |  |
| 218877_s_at  | TRMT11          | 3,822654227  | 3,631821253  | 0,190832974 |  |
| 213738_s_at  | ATP5A1          | 7,293554726  | 7,102773699  | 0,190781027 |  |
| 201170_s_at  | BHLHE40         | 5,023656689  | 4,83315541   | 0,190501279 |  |
| 202892_at    | CDC23           | 4,246090231  | 4,05564712   | 0,190443111 |  |
| 208703_s_at  | APLP2           | 2,846658948  | 2,656223838  | 0,190435109 |  |
| 211746_x_at  | PSMA1           | 5,522627195  | 5,332197571  | 0,190429624 |  |
| 224911_s_at  | DCBLD2          | 4,138203514  | 3,947788666  | 0,190414848 |  |
| 225368_at    | HIPK2           | 4,920655822  | 4,730262306  | 0,190393516 |  |
| 214109_at    | LRBA            | 3,805796305  | 3,615478364  | 0,190317942 |  |
| 203166_at    | CFDP1           | 3,755604375  | 3,565308644  | 0,190295731 |  |
| 223148_at    | PIGS            | 2,609398637  | 2,419116683  | 0,190281954 |  |
| 221935_s_at  | EOGT            | 3,004080279  | 2,813804482  | 0,190275797 |  |
| 210448_s_at  | P2RX5           | 1,381753566  | 1,191491281  | 0,190262285 |  |
| 40850_at     | FKBP8           | 1,381753566  | 1,191491281  | 0,190262285 |  |
| 1552875_a_at | CD200R1         | -2,384869671 | -2,575129729 | 0,190260058 |  |
| 1553746_a_at | OTOGL           | -2,384869671 | -2,575129729 | 0,190260058 |  |
| 1556677_at   | -               | -2,384869671 | -2,575129729 | 0,190260058 |  |
| 1556945_a_at | -               | -2,384869671 | -2,575129729 | 0,190260058 |  |
| 1557046_x_at | LOC100506930    | -2,384869671 | -2,575129729 | 0,190260058 |  |
| 1562031_at   | JAK2            | -2,384869671 | -2,575129729 | 0,190260058 |  |
| 1563920_at   | FAM45A          | -2,384869671 | -2,575129729 | 0,190260058 |  |
| 1569975_at   | -               | -2,384869671 | -2,575129729 | 0,190260058 |  |
| 205980_s_at  | ARHGAP8 /// PR  | -2,384869671 | -2,575129729 | 0,190260058 |  |
| 206190_at    | GPR17           | -2,384869671 | -2,575129729 | 0,190260058 |  |
| 207110_at    | KCNJ12 /// LOC1 | -2,384869671 | -2,575129729 | 0,190260058 |  |
| 208298_at    | EVI5            | -2,384869671 | -2,575129729 | 0,190260058 |  |
| 214842_s_at  | -               | -2,384869671 | -2,575129729 | 0,190260058 |  |
| 215080_s_at  | AGAP2           | -2,384869671 | -2,575129729 | 0,190260058 |  |
| 215790_at    | AJAP1           | -2,384869671 | -2,575129729 | 0,190260058 |  |
| 217292_at    | MTMR7           | -2,384869671 | -2,575129729 | 0,190260058 |  |
| 222384_at    | DKFZP564C196    | -2,384869671 | -2,575129729 | 0,190260058 |  |
| 225759_x_at  | CLMN            | -2,384869671 | -2,575129729 | 0,190260058 |  |
| 229233_at    | NRG3            | -2,384869671 | -2,575129729 | 0,190260058 |  |
| 230809_at    | -               | -2,384869671 | -2,575129729 | 0,190260058 |  |
| 231426_at    | -               | -2,384869671 | -2,575129729 | 0,190260058 |  |
| 239353_at    | STK32A          | -2,384869671 | -2,575129729 | 0,190260058 |  |
| 240408_at    | -               | -2,384869671 | -2,575129729 | 0,190260058 |  |
| 240605_at    | -               | -2,384869671 | -2,575129729 | 0,190260058 |  |

|             |              |              |              |             |  |
|-------------|--------------|--------------|--------------|-------------|--|
| 241858_at   | TNNI3K       | -2,384869671 | -2,575129729 | 0,190260058 |  |
| 242985_x_at | RNF180       | -2,384869671 | -2,575129729 | 0,190260058 |  |
| 244522_at   | -            | -2,384869671 | -2,575129729 | 0,190260058 |  |
| 212163_at   | KIDINS220    | 3,77777851   | 3,587527995  | 0,190250515 |  |
| 201943_s_at | CPD          | 2,134723057  | 1,944570415  | 0,190152642 |  |
| 226036_x_at | CASP2        | 1,305306849  | 1,115234684  | 0,190072165 |  |
| 205456_at   | CD3E         | 0,457392764  | 0,26733076   | 0,190062005 |  |
| 221496_s_at | TOB2         | 0,457392764  | 0,26733076   | 0,190062005 |  |
| 1556473_at  | FLJ38379     | -2,908843709 | -3,098858316 | 0,190014608 |  |
| 1559665_at  | LOC100506999 | -2,908843709 | -3,098858316 | 0,190014608 |  |
| 1562637_at  | SAMD12       | -2,908843709 | -3,098858316 | 0,190014608 |  |
| 1567280_at  | -            | -2,908843709 | -3,098858316 | 0,190014608 |  |
| 206977_at   | PTH          | -2,908843709 | -3,098858316 | 0,190014608 |  |
| 216039_at   | GABRA2       | -2,908843709 | -3,098858316 | 0,190014608 |  |
| 221205_at   | -            | -2,908843709 | -3,098858316 | 0,190014608 |  |
| 231680_at   | -            | -2,908843709 | -3,098858316 | 0,190014608 |  |
| 237879_at   | -            | -2,908843709 | -3,098858316 | 0,190014608 |  |
| 237920_at   | SYCP2        | -2,908843709 | -3,098858316 | 0,190014608 |  |
| 240448_at   | SOGA2        | -2,908843709 | -3,098858316 | 0,190014608 |  |
| 240509_s_at | GREM2        | -2,908843709 | -3,098858316 | 0,190014608 |  |
| 243779_at   | GALNT13      | -2,908843709 | -3,098858316 | 0,190014608 |  |
| 1565851_at  | -            | -3,212234735 | -3,402185466 | 0,189950731 |  |
| 1570633_at  | -            | -3,212234735 | -3,402185466 | 0,189950731 |  |
| 214537_at   | HIST1H1D     | 0,995078803  | 0,805216064  | 0,189862739 |  |
| 227027_at   | GFPT1        | 2,752227654  | 2,562416132  | 0,189811522 |  |
| 209297_at   | ITSN1        | 1,995690482  | 1,805902329  | 0,189788153 |  |
| 222030_at   | SIVA1        | 0,945567441  | 0,755840599  | 0,189726842 |  |
| 227626_at   | PAQR8        | 2,288253583  | 2,098562556  | 0,189691027 |  |
| 226853_at   | BMP2K        | 4,226646405  | 4,037037849  | 0,189608556 |  |
| 203446_s_at | OCRL         | 2,247975581  | 2,058399602  | 0,18957598  |  |
| 223369_at   | NTMT1        | 2,86748657   | 2,677924589  | 0,189561981 |  |
| 202089_s_at | SLC39A6      | 2,663141434  | 2,473581079  | 0,189560354 |  |
| 1566342_at  | -            | 2,582657321  | 2,39311332   | 0,189544001 |  |
| 216652_s_at | DR1          | 2,972842302  | 2,783327323  | 0,189514979 |  |
| 203319_s_at | ZNF148       | 1,094335495  | 0,904843258  | 0,189492236 |  |
| 229393_at   | L3MBTL3      | 1,094335495  | 0,904843258  | 0,189492236 |  |
| 230157_at   | CDH24        | 1,426552034  | 1,23718272   | 0,189369315 |  |
| 201563_at   | SORD         | 4,360703168  | 4,171380634  | 0,189322533 |  |
| 202262_x_at | DDAH2        | 3,260656977  | 3,071356473  | 0,189300504 |  |
| 209134_s_at | RPS6         | 7,867810282  | 7,678598239  | 0,189212043 |  |
| 216858_x_at | -            | 2,001086023  | 1,811954245  | 0,189131778 |  |
| 222857_s_at | KCNMB4       | 2,097427503  | 1,908311039  | 0,189116463 |  |
| 202213_s_at | CUL4B        | 3,729025365  | 3,540009821  | 0,189015544 |  |
| 209974_s_at | BUB3         | 5,802647924  | 5,613677691  | 0,188970233 |  |
| 211678_s_at | RNF114       | 4,485281752  | 4,296432174  | 0,188849578 |  |
| 200077_s_at | OAZ1         | 7,346969566  | 7,158123196  | 0,18884637  |  |
| 1556389_at  | CNPY3        | 0,052199481  | -0,136643983 | 0,188843463 |  |
| 204311_at   | ATP1B2       | 0,052199481  | -0,136643983 | 0,188843463 |  |
| 205508_at   | SCN1B        | 0,052199481  | -0,136643983 | 0,188843463 |  |
| 208603_s_at | MAPK8IP2     | 0,052199481  | -0,136643983 | 0,188843463 |  |
| 220169_at   | TMEM156      | 0,052199481  | -0,136643983 | 0,188843463 |  |
| 233000_x_at | DPH3P1       | 0,052199481  | -0,136643983 | 0,188843463 |  |
| 1553484_at  | LINC00477    | -2,43257096  | -2,621331989 | 0,188761029 |  |
| 1555366_at  | NSAP11       | -2,43257096  | -2,621331989 | 0,188761029 |  |
| 1556881_at  | ARHGEF33     | -2,43257096  | -2,621331989 | 0,188761029 |  |
| 1558645_at  | MIB1         | -2,43257096  | -2,621331989 | 0,188761029 |  |

|              |                    |              |              |             |  |
|--------------|--------------------|--------------|--------------|-------------|--|
| 1560743_a_at | -                  | -2,43257096  | -2,621331989 | 0,188761029 |  |
| 1561660_at   | SLC25A53           | -2,43257096  | -2,621331989 | 0,188761029 |  |
| 1567862_at   | DNAH14             | -2,43257096  | -2,621331989 | 0,188761029 |  |
| 205979_at    | SCGB2A1            | -2,43257096  | -2,621331989 | 0,188761029 |  |
| 216291_at    | ZNF440             | -2,43257096  | -2,621331989 | 0,188761029 |  |
| 225987_at    | STEAP4             | -2,43257096  | -2,621331989 | 0,188761029 |  |
| 234571_at    | -                  | -2,43257096  | -2,621331989 | 0,188761029 |  |
| 237000_at    | -                  | -2,43257096  | -2,621331989 | 0,188761029 |  |
| 237442_at    | -                  | -2,43257096  | -2,621331989 | 0,188761029 |  |
| 237565_at    | -                  | -2,43257096  | -2,621331989 | 0,188761029 |  |
| 239985_at    | -                  | -2,43257096  | -2,621331989 | 0,188761029 |  |
| 214719_at    | SLC46A3            | 3,088871381  | 2,900133867  | 0,188737514 |  |
| 221188_s_at  | CIDEB              | 0,606430281  | 0,417770464  | 0,188659818 |  |
| 228196_s_at  | LARP4B             | 1,504602299  | 1,315948728  | 0,188653571 |  |
| 208242_at    | RAX                | 0,317354302  | 0,128747141  | 0,188607161 |  |
| 210029_at    | IDO1               | 0,317354302  | 0,128747141  | 0,188607161 |  |
| 213055_at    | CD47               | 0,317354302  | 0,128747141  | 0,188607161 |  |
| 230948_at    | -                  | 0,317354302  | 0,128747141  | 0,188607161 |  |
| 235554_x_at  | PACRGL             | 0,317354302  | 0,128747141  | 0,188607161 |  |
| 221894_at    | ADCK2              | 1,318332599  | 1,129843209  | 0,18848939  |  |
| 222568_at    | UGGT1              | 0,541261317  | 0,352836757  | 0,188424559 |  |
| 228823_at    | POLR2J2            | 0,541261317  | 0,352836757  | 0,188424559 |  |
| 235993_at    | PSMF1              | 0,541261317  | 0,352836757  | 0,188424559 |  |
| 240991_at    | -                  | 0,541261317  | 0,352836757  | 0,188424559 |  |
| 242080_at    | -                  | 0,541261317  | 0,352836757  | 0,188424559 |  |
| 203324_s_at  | CAV2               | 5,844049959  | 5,65571578   | 0,188334178 |  |
| 1557295_a_at | -                  | -1,353583928 | -1,541908042 | 0,188324114 |  |
| 1561526_at   | -                  | -1,353583928 | -1,541908042 | 0,188324114 |  |
| 1562253_at   | SLC7A11-AS1        | -1,353583928 | -1,541908042 | 0,188324114 |  |
| 1564626_at   | -                  | -1,353583928 | -1,541908042 | 0,188324114 |  |
| 205659_at    | HDAC9              | -1,353583928 | -1,541908042 | 0,188324114 |  |
| 207179_at    | TLX1               | -1,353583928 | -1,541908042 | 0,188324114 |  |
| 214935_at    | IL4I1 /// NUP62 // | -1,353583928 | -1,541908042 | 0,188324114 |  |
| 220624_s_at  | ELF5               | -1,353583928 | -1,541908042 | 0,188324114 |  |
| 221316_at    | CATSPERG           | -1,353583928 | -1,541908042 | 0,188324114 |  |
| 222197_s_at  | -                  | -1,353583928 | -1,541908042 | 0,188324114 |  |
| 224172_at    | -                  | -1,353583928 | -1,541908042 | 0,188324114 |  |
| 228596_at    | LOC728377          | -1,353583928 | -1,541908042 | 0,188324114 |  |
| 231118_at    | ANKRD35            | -1,353583928 | -1,541908042 | 0,188324114 |  |
| 231729_s_at  | CAPS               | -1,353583928 | -1,541908042 | 0,188324114 |  |
| 233629_at    | -                  | -1,353583928 | -1,541908042 | 0,188324114 |  |
| 236678_at    | -                  | -1,353583928 | -1,541908042 | 0,188324114 |  |
| 240785_at    | -                  | -1,353583928 | -1,541908042 | 0,188324114 |  |
| 242644_at    | TMC8               | -1,353583928 | -1,541908042 | 0,188324114 |  |
| 244595_at    | -                  | -1,353583928 | -1,541908042 | 0,188324114 |  |
| 244701_at    | -                  | -1,353583928 | -1,541908042 | 0,188324114 |  |
| 212648_at    | DHX29              | 3,918438257  | 3,730171924  | 0,188266334 |  |
| 212206_s_at  | H2AFV              | 3,472604685  | 3,284389368  | 0,188215317 |  |
| 224778_s_at  | TAOK1              | 1,932146506  | 1,743944487  | 0,188202018 |  |
| 222000_at    | C1orf174           | 4,218563327  | 4,030564794  | 0,187998533 |  |
| 208619_at    | DDB1               | 4,860334514  | 4,672396377  | 0,187938137 |  |
| 214259_s_at  | AKR7A2             | 3,456984333  | 3,269073685  | 0,187910648 |  |
| 204936_at    | MAP4K2             | -0,543051993 | -0,730778808 | 0,187726815 |  |
| 214536_at    | SLURP1             | -0,543051993 | -0,730778808 | 0,187726815 |  |
| 229330_at    | -                  | -0,543051993 | -0,730778808 | 0,187726815 |  |
| 203470_s_at  | PLEK               | 0,911589958  | 0,724100169  | 0,187489789 |  |

|              |            |              |              |             |  |
|--------------|------------|--------------|--------------|-------------|--|
| 228239_at    | FAM165B    | 0,911589958  | 0,724100169  | 0,187489789 |  |
| 1569719_at   | BCL2L14    | -3,250025915 | -3,437493426 | 0,187467511 |  |
| 218399_s_at  | CDCA4      | 3,829494273  | 3,642048499  | 0,187445774 |  |
| 221966_at    | GPR137     | 1,649074067  | 1,461646549  | 0,187427517 |  |
| 204647_at    | HOMER3     | 1,829737795  | 1,642321262  | 0,187416533 |  |
| 222530_s_at  | MKKS       | 4,657889997  | 4,470561285  | 0,187328712 |  |
| 222903_s_at  | CPEB1      | 0,859074518  | 0,67181667   | 0,187257848 |  |
| 235036_at    | LIX1L      | 0,859074518  | 0,67181667   | 0,187257848 |  |
| 209397_at    | ME2        | 4,529358299  | 4,34210478   | 0,18725352  |  |
| 202106_at    | GOLGA3     | 2,758612869  | 2,571362843  | 0,187250025 |  |
| 237040_at    | CWF19L2    | 0,682279745  | 0,495031851  | 0,187247895 |  |
| 206289_at    | HOXA4      | 0,480753764  | 0,293518836  | 0,187234928 |  |
| 244656_at    | RASL10B    | 0,480753764  | 0,293518836  | 0,187234928 |  |
| 206509_at    | PIP        | 0,246434561  | 0,059218869  | 0,187215692 |  |
| 212038_s_at  | VDAC1      | 5,37147771   | 5,184334316  | 0,187143394 |  |
| 228825_at    | PTGR1      | -0,033456564 | -0,220592223 | 0,187135659 |  |
| 236880_at    | RAD52      | -0,033456564 | -0,220592223 | 0,187135659 |  |
| 221028_s_at  | GFOD2      | 1,481627361  | 1,294497133  | 0,187130228 |  |
| 213375_s_at  | N4BP2L1    | 1,446464021  | 1,259496994  | 0,186967026 |  |
| 212329_at    | SCAP       | 2,68509622   | 2,498185745  | 0,186910476 |  |
| 204185_x_at  | PPID       | 4,731959456  | 4,545117128  | 0,186842328 |  |
| 211717_at    | ANKRD40    | 1,292162421  | 1,105412836  | 0,186749585 |  |
| 202232_s_at  | EIF3M      | 5,940313411  | 5,753585187  | 0,186728225 |  |
| 225493_at    | CCNT1      | 3,76356289   | 3,576905405  | 0,186657485 |  |
| 216360_x_at  | RRP12      | 1,021868205  | 0,835239052  | 0,186629153 |  |
| 1553768_a_at | DCBLD1     | -0,136301282 | -0,322870281 | 0,186568999 |  |
| 205418_at    | FES        | -0,136301282 | -0,322870281 | 0,186568999 |  |
| 220839_at    | METTL5     | -0,136301282 | -0,322870281 | 0,186568999 |  |
| 229844_at    | FOXP1      | -0,136301282 | -0,322870281 | 0,186568999 |  |
| 203968_s_at  | CDC6       | 3,431234921  | 3,244672787  | 0,186562134 |  |
| 227224_at    | RALGPS2    | 1,946200473  | 1,759685182  | 0,186515291 |  |
| 1558340_at   | DIXDC1     | -1,308181863 | -1,494668682 | 0,186486819 |  |
| 1562717_at   | LINC00299  | -1,308181863 | -1,494668682 | 0,186486819 |  |
| 1569387_at   | CSGALNACT1 | -1,308181863 | -1,494668682 | 0,186486819 |  |
| 203329_at    | PTPRM      | -1,308181863 | -1,494668682 | 0,186486819 |  |
| 204539_s_at  | CELSR1     | -1,308181863 | -1,494668682 | 0,186486819 |  |
| 205597_at    | SLC44A4    | -1,308181863 | -1,494668682 | 0,186486819 |  |
| 232155_at    | RNF213     | -1,308181863 | -1,494668682 | 0,186486819 |  |
| 235934_at    | NAPA-AS1   | -1,308181863 | -1,494668682 | 0,186486819 |  |
| 237162_at    | KANK1      | -1,308181863 | -1,494668682 | 0,186486819 |  |
| 237696_at    | -          | -1,308181863 | -1,494668682 | 0,186486819 |  |
| 238945_at    | ACER3      | -1,308181863 | -1,494668682 | 0,186486819 |  |
| 239934_x_at  | -          | -1,308181863 | -1,494668682 | 0,186486819 |  |
| 240466_at    | -          | -1,308181863 | -1,494668682 | 0,186486819 |  |
| 228385_at    | DDX59      | 1,119359127  | 0,932882274  | 0,186476854 |  |
| 226021_at    | RDH10      | 2,794789337  | 2,608344689  | 0,186444648 |  |
| 227426_at    | SOS1       | 2,450859799  | 2,264418116  | 0,186441682 |  |
| 227031_at    | SNX13      | 1,523472489  | 1,337086025  | 0,186386464 |  |
| 1558783_at   | -          | 0,97328325   | 0,786897721  | 0,186385529 |  |
| 205584_at    | ALG13      | 0,97328325   | 0,786897721  | 0,186385529 |  |
| 227601_at    | METTL14    | 2,166283906  | 1,979940779  | 0,186343127 |  |
| 1553620_at   | TRIM42     | -2,504600601 | -2,690860744 | 0,186260143 |  |
| 1555073_at   | MGC40069   | -2,504600601 | -2,690860744 | 0,186260143 |  |
| 1558402_at   | -          | -2,504600601 | -2,690860744 | 0,186260143 |  |
| 1558950_at   | -          | -2,504600601 | -2,690860744 | 0,186260143 |  |
| 1559265_at   | SKIDA1     | -2,504600601 | -2,690860744 | 0,186260143 |  |

|              |              |              |              |             |  |
|--------------|--------------|--------------|--------------|-------------|--|
| 1560185_at   | -            | -2,504600601 | -2,690860744 | 0,186260143 |  |
| 1560755_at   | -            | -2,504600601 | -2,690860744 | 0,186260143 |  |
| 1561795_at   | -            | -2,504600601 | -2,690860744 | 0,186260143 |  |
| 1564940_at   | -            | -2,504600601 | -2,690860744 | 0,186260143 |  |
| 1566478_at   | C17orf104    | -2,504600601 | -2,690860744 | 0,186260143 |  |
| 205669_at    | NCAM2        | -2,504600601 | -2,690860744 | 0,186260143 |  |
| 206641_at    | TNFRSF17     | -2,504600601 | -2,690860744 | 0,186260143 |  |
| 214884_at    | MCF2         | -2,504600601 | -2,690860744 | 0,186260143 |  |
| 216276_s_at  | ADAM3A       | -2,504600601 | -2,690860744 | 0,186260143 |  |
| 216588_at    | -            | -2,504600601 | -2,690860744 | 0,186260143 |  |
| 233312_at    | ROPN1L       | -2,504600601 | -2,690860744 | 0,186260143 |  |
| 241023_at    | -            | -2,504600601 | -2,690860744 | 0,186260143 |  |
| 241332_at    | -            | -2,504600601 | -2,690860744 | 0,186260143 |  |
| 243342_at    | -            | -2,504600601 | -2,690860744 | 0,186260143 |  |
| 244594_x_at  | -            | -2,504600601 | -2,690860744 | 0,186260143 |  |
| 244724_at    | -            | -2,504600601 | -2,690860744 | 0,186260143 |  |
| 244866_at    | -            | -2,504600601 | -2,690860744 | 0,186260143 |  |
| 217917_s_at  | DYNLRB1      | 5,227862525  | 5,041624605  | 0,186237919 |  |
| 223076_s_at  | NSUN2        | 3,698630507  | 3,512402411  | 0,186228096 |  |
| 211793_s_at  | ABI2         | 2,122398022  | 1,936283387  | 0,186114635 |  |
| 222504_s_at  | EMC8         | 1,783520648  | 1,59747851   | 0,186042138 |  |
| 1562488_at   | PIEZO2       | -0,926850548 | -1,112851844 | 0,186001296 |  |
| 1563228_x_at | SLC38A10     | -0,926850548 | -1,112851844 | 0,186001296 |  |
| 206962_x_at  | -            | -0,926850548 | -1,112851844 | 0,186001296 |  |
| 208177_at    | SLC34A1      | -0,926850548 | -1,112851844 | 0,186001296 |  |
| 228035_at    | STK33        | -0,926850548 | -1,112851844 | 0,186001296 |  |
| 229818_at    | SVOP         | -0,926850548 | -1,112851844 | 0,186001296 |  |
| 236447_at    | -            | -0,926850548 | -1,112851844 | 0,186001296 |  |
| 236941_at    | PRR14L       | -0,926850548 | -1,112851844 | 0,186001296 |  |
| 236942_at    | -            | -0,926850548 | -1,112851844 | 0,186001296 |  |
| 239176_at    | -            | -0,926850548 | -1,112851844 | 0,186001296 |  |
| 240571_at    | -            | -0,926850548 | -1,112851844 | 0,186001296 |  |
| 243978_at    | FAM65C       | -0,926850548 | -1,112851844 | 0,186001296 |  |
| 1559096_x_at | FBXO9        | 1,339784194  | 1,153866761  | 0,185917433 |  |
| 215581_s_at  | MCM3AP       | 1,339784194  | 1,153866761  | 0,185917433 |  |
| 202596_at    | ENSA         | 4,791943463  | 4,606029888  | 0,185913575 |  |
| 217753_s_at  | RPS26        | 7,472082308  | 7,286183356  | 0,185898952 |  |
| 221543_s_at  | ERLIN2       | 3,51093129   | 3,325159096  | 0,185772194 |  |
| 218209_s_at  | RPRD1A       | 3,279650757  | 3,09388391   | 0,185766847 |  |
| 223250_at    | KLHL7        | 2,771299138  | 2,585563171  | 0,185735967 |  |
| 232661_s_at  | RBM48        | 1,079110292  | 0,893473268  | 0,185637024 |  |
| 202813_at    | TARBP1       | 2,531373922  | 2,345926937  | 0,185446986 |  |
| 205335_s_at  | SRP19        | 5,398050406  | 5,212630303  | 0,185420102 |  |
| 217730_at    | TMBIM1       | 4,61981709   | 4,434486264  | 0,185330826 |  |
| 200866_s_at  | PSAP         | 4,514815228  | 4,329503706  | 0,185311523 |  |
| 209109_s_at  | TSPAN6       | 4,419307767  | 4,234134575  | 0,185173192 |  |
| 242915_at    | ZNF682       | 0,083054335  | -0,102100538 | 0,185154872 |  |
| 243053_x_at  | LOC100128079 | 0,083054335  | -0,102100538 | 0,185154872 |  |
| 227085_at    | H2AFV        | 3,285189903  | 3,100079607  | 0,185110297 |  |
| 223098_s_at  | LONP2        | 2,243430036  | 2,058399602  | 0,185030435 |  |
| 1554627_a_at | ASCC1        | 3,120200849  | 2,935211251  | 0,184989598 |  |
| 218930_s_at  | TMEM106B     | 2,327437554  | 2,14244844   | 0,184989114 |  |
| 215429_s_at  | ZNF428       | 2,637386731  | 2,452428893  | 0,184957838 |  |
| 218214_at    | C12orf44     | 3,211467103  | 3,026519779  | 0,184947324 |  |
| 235390_at    | SREK1IP1     | 2,178241192  | 1,993317152  | 0,184924039 |  |
| 218646_at    | C4orf27      | 3,638448528  | 3,453616097  | 0,184832431 |  |

|              |                 |              |              |             |  |
|--------------|-----------------|--------------|--------------|-------------|--|
| 219418_at    | NHEJ1 /// SLC23 | 1,764611101  | 1,579853228  | 0,184757872 |  |
| 239863_at    | -               | 1,224581536  | 1,039887232  | 0,184694304 |  |
| 1555514_a_at | PIAS2           | 2,225103271  | 2,040470494  | 0,184632777 |  |
| 217232_x_at  | HBB             | 4,769592513  | 4,584979629  | 0,184612884 |  |
| 216080_s_at  | FADS3           | 1,672933557  | 1,488344553  | 0,184589004 |  |
| 1552765_x_at | TMEM67          | -2,551294263 | -2,735862426 | 0,184568163 |  |
| 1552971_at   | SGCZ            | -2,551294263 | -2,735862426 | 0,184568163 |  |
| 1559670_at   | LOC100506489    | -2,551294263 | -2,735862426 | 0,184568163 |  |
| 1563522_at   | DDX10           | -2,551294263 | -2,735862426 | 0,184568163 |  |
| 205590_at    | RASGRP1         | -2,551294263 | -2,735862426 | 0,184568163 |  |
| 207052_at    | HAVCR1          | -2,551294263 | -2,735862426 | 0,184568163 |  |
| 228949_at    | WLS             | -2,551294263 | -2,735862426 | 0,184568163 |  |
| 230309_at    | BHMT2           | -2,551294263 | -2,735862426 | 0,184568163 |  |
| 232144_at    | -               | -2,551294263 | -2,735862426 | 0,184568163 |  |
| 233365_at    | -               | -2,551294263 | -2,735862426 | 0,184568163 |  |
| 234577_at    | -               | -2,551294263 | -2,735862426 | 0,184568163 |  |
| 238379_x_at  | -               | -2,551294263 | -2,735862426 | 0,184568163 |  |
| 240955_at    | PANX3           | -2,551294263 | -2,735862426 | 0,184568163 |  |
| 241369_at    | -               | -2,551294263 | -2,735862426 | 0,184568163 |  |
| 214359_s_at  | HSP90AB1        | 6,567212057  | 6,38265478   | 0,184557277 |  |
| 226942_at    | PHF20L1         | 3,123915073  | 2,939363796  | 0,184551277 |  |
| 218954_s_at  | BRF2            | 2,064305961  | 1,879785595  | 0,184520365 |  |
| 233960_s_at  | LOC100133445 /  | 0,641402394  | 0,456918297  | 0,184484097 |  |
| 228327_x_at  | MEIS3           | 1,089278259  | 0,904843258  | 0,184435001 |  |
| 210672_s_at  | NPRL3           | 1,990274687  | 1,805902329  | 0,184372358 |  |
| 206183_s_at  | HERC3           | -0,234278768 | -0,41858459  | 0,184305822 |  |
| 213706_at    | GPD1            | -0,234278768 | -0,41858459  | 0,184305822 |  |
| 217374_x_at  | -               | -0,234278768 | -0,41858459  | 0,184305822 |  |
| 219400_at    | CNTNAP1         | -0,234278768 | -0,41858459  | 0,184305822 |  |
| 219521_at    | B3GAT1          | -0,234278768 | -0,41858459  | 0,184305822 |  |
| 223544_at    | TMEM79          | -0,234278768 | -0,41858459  | 0,184305822 |  |
| 227306_at    | -               | -0,234278768 | -0,41858459  | 0,184305822 |  |
| 239730_at    | DGCR14 /// TSS  | -0,234278768 | -0,41858459  | 0,184305822 |  |
| 226077_at    | RNF145          | 3,67603922   | 3,491815843  | 0,184223377 |  |
| 229145_at    | ANAPC16         | 2,114952142  | 1,930732138  | 0,184220004 |  |
| 202133_at    | WWTR1           | 3,877954598  | 3,693764321  | 0,184190277 |  |
| 202419_at    | KDSR            | 3,042527069  | 2,858346012  | 0,184181057 |  |
| 201469_s_at  | SHC1            | 1,314003737  | 1,129843209  | 0,184160528 |  |
| 228951_at    | SLC38A7         | 0,57782909   | 0,393761504  | 0,184067586 |  |
| 225922_at    | FNIP2           | 2,043538949  | 1,859476797  | 0,184062152 |  |
| 217812_at    | YTHDF2          | 4,689563828  | 4,505522833  | 0,184040994 |  |
| 232946_s_at  | NADSYN1         | 1,709647566  | 1,525647381  | 0,184000185 |  |
| 220235_s_at  | LRIF1           | 3,886725813  | 3,702749166  | 0,183976647 |  |
| 1555858_at   | LOC440944       | 1,274448124  | 1,090553537  | 0,183894587 |  |
| 207980_s_at  | CITED2          | 3,492853048  | 3,309203139  | 0,183649909 |  |
| 205995_x_at  | IQCB1           | 2,632180155  | 2,448549499  | 0,183630656 |  |
| 203964_at    | NMI             | 4,413755582  | 4,230185498  | 0,183570084 |  |
| 208492_at    | RFXAP           | 0,359971644  | 0,176436073  | 0,183535571 |  |
| 239515_at    | -               | 0,359971644  | 0,176436073  | 0,183535571 |  |
| 202648_at    | TCF3            | 2,190100188  | 2,006570641  | 0,183529546 |  |
| 218791_s_at  | C15orf29        | 1,04816921   | 0,864649967  | 0,183519243 |  |
| 228433_at    | NFYA            | 3,299492934  | 3,116064987  | 0,183427947 |  |
| 217543_s_at  | MBTPS1          | 1,683039483  | 1,499637023  | 0,18340246  |  |
| 208546_x_at  | HIST1H2BH       | 5,581663686  | 5,398297283  | 0,183366403 |  |
| 228978_at    | LOC645722       | 0,715481152  | 0,532164371  | 0,183316781 |  |
| 233881_s_at  | TOLLIP          | 0,715481152  | 0,532164371  | 0,183316781 |  |



|              |                  |              |              |             |  |
|--------------|------------------|--------------|--------------|-------------|--|
| 238084_at    | PCGF3            | 0,715481152  | 0,532164371  | 0,183316781 |  |
| 241826_x_at  | ZNF738           | 0,715481152  | 0,532164371  | 0,183316781 |  |
| 219110_at    | GAR1             | 5,105773197  | 4,922569129  | 0,183204068 |  |
| 1555600_s_at | APOL4            | -1,240169874 | -1,423348341 | 0,183178467 |  |
| 1556536_at   | LOC729224        | -1,240169874 | -1,423348341 | 0,183178467 |  |
| 1561207_at   | -                | -1,240169874 | -1,423348341 | 0,183178467 |  |
| 1562984_at   | -                | -1,240169874 | -1,423348341 | 0,183178467 |  |
| 204063_s_at  | ULK2             | -1,240169874 | -1,423348341 | 0,183178467 |  |
| 205154_at    | LRRN2            | -1,240169874 | -1,423348341 | 0,183178467 |  |
| 211467_s_at  | NFIB             | -1,240169874 | -1,423348341 | 0,183178467 |  |
| 214255_at    | ATP10A           | -1,240169874 | -1,423348341 | 0,183178467 |  |
| 214384_s_at  | DCTN2            | -1,240169874 | -1,423348341 | 0,183178467 |  |
| 225807_at    | AJUBA            | -1,240169874 | -1,423348341 | 0,183178467 |  |
| 231440_at    | LOC100507206     | -1,240169874 | -1,423348341 | 0,183178467 |  |
| 233701_at    | -                | -1,240169874 | -1,423348341 | 0,183178467 |  |
| 234792_x_at  | IGHA1 /// IGHV4- | -1,240169874 | -1,423348341 | 0,183178467 |  |
| 239613_at    | -                | -1,240169874 | -1,423348341 | 0,183178467 |  |
| 244449_at    | LOC100506021     | -1,240169874 | -1,423348341 | 0,183178467 |  |
| 207260_at    | FEV              | 1,000476627  | 0,817300337  | 0,18317629  |  |
| 1552275_s_at | PXK              | -0,352951799 | -0,536087151 | 0,183135352 |  |
| 1554800_at   | RAB39A           | -0,352951799 | -0,536087151 | 0,183135352 |  |
| 204907_s_at  | BCL3             | -0,352951799 | -0,536087151 | 0,183135352 |  |
| 219171_s_at  | ZNF236           | -0,352951799 | -0,536087151 | 0,183135352 |  |
| 219712_s_at  | SHPK /// TRPV1   | -0,352951799 | -0,536087151 | 0,183135352 |  |
| 220678_at    | FLJ20712         | -0,352951799 | -0,536087151 | 0,183135352 |  |
| 222242_s_at  | KLK5             | -0,352951799 | -0,536087151 | 0,183135352 |  |
| 236017_at    | CDKL3            | -0,352951799 | -0,536087151 | 0,183135352 |  |
| 238432_at    | FLJ35776         | -0,352951799 | -0,536087151 | 0,183135352 |  |
| 242685_at    | GTPBP8           | -0,352951799 | -0,536087151 | 0,183135352 |  |
| 229192_s_at  | TBCD             | 1,238353345  | 1,055274826  | 0,183078519 |  |
| 218970_s_at  | CUTC             | 2,950705598  | 2,767843855  | 0,182861743 |  |
| 206812_at    | ADRB3            | -0,67289328  | -0,855751026 | 0,182857746 |  |
| 215221_at    | -                | -0,67289328  | -0,855751026 | 0,182857746 |  |
| 215390_at    | -                | -0,67289328  | -0,855751026 | 0,182857746 |  |
| 231097_at    | -                | -0,67289328  | -0,855751026 | 0,182857746 |  |
| 231474_at    | KHDC3L           | -0,67289328  | -0,855751026 | 0,182857746 |  |
| 232813_s_at  | GOLGA6A /// GO   | -0,67289328  | -0,855751026 | 0,182857746 |  |
| 233352_at    | -                | -0,67289328  | -0,855751026 | 0,182857746 |  |
| 233728_at    | -                | -0,67289328  | -0,855751026 | 0,182857746 |  |
| 235739_at    | -                | -0,67289328  | -0,855751026 | 0,182857746 |  |
| 237782_at    | -                | -0,67289328  | -0,855751026 | 0,182857746 |  |
| 239031_at    | SSTR2            | -0,67289328  | -0,855751026 | 0,182857746 |  |
| 1554337_at   | FARP2            | -2,597496523 | -2,780313924 | 0,182817401 |  |
| 1557280_s_at | ITSN1            | -2,597496523 | -2,780313924 | 0,182817401 |  |
| 1560723_at   | LOC283731        | -2,597496523 | -2,780313924 | 0,182817401 |  |
| 1561964_at   | -                | -2,597496523 | -2,780313924 | 0,182817401 |  |
| 1566899_at   | -                | -2,597496523 | -2,780313924 | 0,182817401 |  |
| 205696_s_at  | GFRA1            | -2,597496523 | -2,780313924 | 0,182817401 |  |
| 212977_at    | CXCR7            | -2,597496523 | -2,780313924 | 0,182817401 |  |
| 215981_at    | LOC100505534     | -2,597496523 | -2,780313924 | 0,182817401 |  |
| 219701_at    | TMOD2            | -2,597496523 | -2,780313924 | 0,182817401 |  |
| 221117_at    | -                | -2,597496523 | -2,780313924 | 0,182817401 |  |
| 225960_at    | ZNRF1            | -2,597496523 | -2,780313924 | 0,182817401 |  |
| 232365_at    | SIAH1            | -2,597496523 | -2,780313924 | 0,182817401 |  |
| 232777_s_at  | C6orf118         | -2,597496523 | -2,780313924 | 0,182817401 |  |
| 233948_at    | TBX5-AS1         | -2,597496523 | -2,780313924 | 0,182817401 |  |

|              |                  |              |              |             |  |
|--------------|------------------|--------------|--------------|-------------|--|
| 234596_at    | -                | -2,597496523 | -2,780313924 | 0,182817401 |  |
| 236888_at    | CAPZA3           | -2,597496523 | -2,780313924 | 0,182817401 |  |
| 237885_at    | SOX21-AS1        | -2,597496523 | -2,780313924 | 0,182817401 |  |
| 240299_at    | ADAD1            | -2,597496523 | -2,780313924 | 0,182817401 |  |
| 240796_at    | -                | -2,597496523 | -2,780313924 | 0,182817401 |  |
| 241969_at    | ARID5B           | -2,597496523 | -2,780313924 | 0,182817401 |  |
| 243473_at    | -                | -2,597496523 | -2,780313924 | 0,182817401 |  |
| 244261_at    | IL28RA           | -2,597496523 | -2,780313924 | 0,182817401 |  |
| 227591_at    | LOC100505696     | 0,103263601  | -0,079522948 | 0,18278655  |  |
| 231291_at    | -                | 0,103263601  | -0,079522948 | 0,18278655  |  |
| 233586_s_at  | KLK12            | 0,103263601  | -0,079522948 | 0,18278655  |  |
| 242108_at    | -                | 0,103263601  | -0,079522948 | 0,18278655  |  |
| 49452_at     | ACACB            | 0,103263601  | -0,079520317 | 0,182783919 |  |
| 205318_at    | KIF5A            | -0,496991414 | -0,679763839 | 0,182772426 |  |
| 214275_at    | MED12            | -0,496991414 | -0,679763839 | 0,182772426 |  |
| 218634_at    | PHLDA3           | -0,496991414 | -0,679763839 | 0,182772426 |  |
| 221008_s_at  | AGXT2L1          | -0,496991414 | -0,679763839 | 0,182772426 |  |
| 221199_at    | GFRA4            | -0,496991414 | -0,679763839 | 0,182772426 |  |
| 231910_at    | NUDT14           | -0,496991414 | -0,679763839 | 0,182772426 |  |
| 232816_s_at  | DDX11            | -0,496991414 | -0,679763839 | 0,182772426 |  |
| 235788_at    | -                | -0,496991414 | -0,679763839 | 0,182772426 |  |
| 241596_at    | NUDT10           | -0,496991414 | -0,679763839 | 0,182772426 |  |
| 242083_at    | ZNF81            | -0,496991414 | -0,679763839 | 0,182772426 |  |
| 218850_s_at  | LIMD1            | 0,518867317  | 0,336136178  | 0,182731139 |  |
| 236630_at    | AQP2             | 0,518867317  | 0,336136178  | 0,182731139 |  |
| 237947_at    | -                | 0,518867317  | 0,336136178  | 0,182731139 |  |
| 205034_at    | CCNE2            | 4,268634793  | 4,085930792  | 0,182704001 |  |
| 204968_at    | C6orf47          | 0,841135803  | 0,658444279  | 0,182691524 |  |
| 232029_at    | -                | 0,841135803  | 0,658444279  | 0,182691524 |  |
| 225438_at    | NUDCD1           | 1,326951551  | 1,144305291  | 0,18264626  |  |
| 227741_at    | PTPLB            | 1,326951551  | 1,144305291  | 0,18264626  |  |
| 243964_at    | -                | 1,326951551  | 1,144305291  | 0,18264626  |  |
| 200640_at    | YWHAZ            | 5,887213751  | 5,704616451  | 0,182597299 |  |
| 237520_x_at  | -                | -3,32387526  | -3,506469152 | 0,182593893 |  |
| 217731_s_at  | ITM2B            | 5,117309148  | 4,934753321  | 0,182555826 |  |
| 200840_at    | KARS             | 6,914385573  | 6,73197677   | 0,182408802 |  |
| 37022_at     | PRELP            | 0,20027154   | 0,01793138   | 0,18234016  |  |
| 225348_at    | SRSF10           | 1,593009234  | 1,410714371  | 0,182294863 |  |
| 203613_s_at  | NDUFB6           | 5,844894131  | 5,662639447  | 0,182254684 |  |
| 208666_s_at  | ST13             | 3,93615092   | 3,753943043  | 0,182207876 |  |
| 41386_i_at   | KDM6B            | 2,132266459  | 1,950068772  | 0,182197687 |  |
| 218640_s_at  | PLEKHF2          | 4,993182736  | 4,811041972  | 0,182140764 |  |
| 223992_x_at  | ZCWPW1           | 0,661985843  | 0,479907041  | 0,182078802 |  |
| 203903_s_at  | HEPH             | 5,29611668   | 5,114131207  | 0,181985473 |  |
| 223246_s_at  | STRBP            | 1,373456798  | 1,191491281  | 0,181965517 |  |
| 209157_at    | DNAJA2           | 4,781007315  | 4,599047207  | 0,181960109 |  |
| 206560_s_at  | MIA              | 0,291166226  | 0,109221392  | 0,181944833 |  |
| 214634_at    | HIST1H4A /// HIS | 0,291166226  | 0,109221392  | 0,181944833 |  |
| 227857_at    | -                | 0,291166226  | 0,109221392  | 0,181944833 |  |
| 238724_at    | -                | 0,291166226  | 0,109221392  | 0,181944833 |  |
| 212910_at    | THAP11           | 3,098971025  | 2,917077481  | 0,181893544 |  |
| 1554700_at   | CDH7             | -3,054236653 | -3,236070201 | 0,181833548 |  |
| 1563186_at   | -                | -3,054236653 | -3,236070201 | 0,181833548 |  |
| 1563396_x_at | -                | -3,054236653 | -3,236070201 | 0,181833548 |  |
| 210729_at    | NPY2R            | -3,054236653 | -3,236070201 | 0,181833548 |  |
| 222966_at    | -                | -3,054236653 | -3,236070201 | 0,181833548 |  |

|              |                  |              |              |             |  |
|--------------|------------------|--------------|--------------|-------------|--|
| 223315_at    | NTN4             | -3,054236653 | -3,236070201 | 0,181833548 |  |
| 223681_s_at  | INADL            | -3,054236653 | -3,236070201 | 0,181833548 |  |
| 232125_at    | -                | -3,054236653 | -3,236070201 | 0,181833548 |  |
| 233326_at    | CCDC39           | -3,054236653 | -3,236070201 | 0,181833548 |  |
| 233772_at    | POU6F2-AS2       | -3,054236653 | -3,236070201 | 0,181833548 |  |
| 234426_x_at  | PIH2             | -3,054236653 | -3,236070201 | 0,181833548 |  |
| 237865_x_at  | -                | -3,054236653 | -3,236070201 | 0,181833548 |  |
| 241184_x_at  | -                | -3,054236653 | -3,236070201 | 0,181833548 |  |
| 243681_at    | SHANK2           | -3,054236653 | -3,236070201 | 0,181833548 |  |
| 217959_s_at  | MIR3656 /// TRA  | 4,308347938  | 4,126559358  | 0,18178858  |  |
| 238565_at    | -                | 1,631786706  | 1,450051551  | 0,181735155 |  |
| 222742_s_at  | RABL5            | 2,987866617  | 2,806245339  | 0,181621277 |  |
| 209077_at    | TXN2             | 4,040056475  | 3,858511405  | 0,181545069 |  |
| 215720_s_at  | NFYA             | 1,114389003  | 0,932882274  | 0,18150673  |  |
| 240854_x_at  | -                | 1,114389003  | 0,932882274  | 0,18150673  |  |
| 211733_x_at  | SCP2             | 4,96239695   | 4,780891495  | 0,181505455 |  |
| 226161_at    | SLC30A6          | 2,908260915  | 2,726791458  | 0,181469457 |  |
| 32259_at     | EZH1             | 1,617806104  | 1,436405209  | 0,181400895 |  |
| 1552330_at   | CENPBD1          | 1,530951994  | 1,349621332  | 0,181330662 |  |
| 223002_s_at  | XRN2             | 4,312693778  | 4,131407181  | 0,181286597 |  |
| 1556423_at   | VASH1            | 0,209623097  | 0,028364014  | 0,181259083 |  |
| 210737_at    | TUB              | 0,209623097  | 0,028364014  | 0,181259083 |  |
| 200712_s_at  | MAPRE1           | 4,467364499  | 4,286143696  | 0,181220803 |  |
| 218230_at    | ARFIP1           | 3,41111015   | 3,23005767   | 0,18105248  |  |
| 202744_at    | SLC20A2          | 0,735041319  | 0,553993624  | 0,181047695 |  |
| 207215_at    | GSTTP1           | 0,735041319  | 0,553993624  | 0,181047695 |  |
| 225722_at    | MIR3658 /// UCK  | 0,735041319  | 0,553993624  | 0,181047695 |  |
| 1557756_a_at | CEP128           | -1,196375121 | -1,377419394 | 0,181044273 |  |
| 1561910_at   | -                | -1,196375121 | -1,377419394 | 0,181044273 |  |
| 1569555_at   | GDA              | -1,196375121 | -1,377419394 | 0,181044273 |  |
| 203838_s_at  | TNK2             | -1,196375121 | -1,377419394 | 0,181044273 |  |
| 206278_at    | PTAFR            | -1,196375121 | -1,377419394 | 0,181044273 |  |
| 207015_s_at  | ALDH1A2          | -1,196375121 | -1,377419394 | 0,181044273 |  |
| 209910_at    | SLC25A16         | -1,196375121 | -1,377419394 | 0,181044273 |  |
| 210255_at    | RAD51B           | -1,196375121 | -1,377419394 | 0,181044273 |  |
| 211722_s_at  | HDAC6            | -1,196375121 | -1,377419394 | 0,181044273 |  |
| 222560_at    | LANCL2           | -1,196375121 | -1,377419394 | 0,181044273 |  |
| 222949_at    | NXF3             | -1,196375121 | -1,377419394 | 0,181044273 |  |
| 232151_at    | MACC1            | -1,196375121 | -1,377419394 | 0,181044273 |  |
| 232255_at    | LOC401321        | -1,196375121 | -1,377419394 | 0,181044273 |  |
| 235395_at    | SEC63            | -1,196375121 | -1,377419394 | 0,181044273 |  |
| 212834_at    | DDX52            | 1,381753566  | 1,200746069  | 0,181007497 |  |
| 203545_at    | ALG8             | 4,421321457  | 4,24031851   | 0,181002947 |  |
| 220290_at    | AIM1L            | 0,533835206  | 0,352836757  | 0,180998449 |  |
| 225543_at    | GTF3C4           | 2,912562019  | 2,731588328  | 0,180973692 |  |
| 219826_at    | ZNF419           | 1,735773781  | 1,55481039   | 0,180963391 |  |
| 225799_at    | LINC00152 /// LC | 5,483891762  | 5,302953328  | 0,180938434 |  |
| 200722_s_at  | CAPRIN1          | 4,300164033  | 4,119256941  | 0,180907092 |  |
| 208634_s_at  | MACF1            | 3,906268218  | 3,725370335  | 0,180897883 |  |
| 215600_x_at  | FBXW12           | 2,213529682  | 2,032717854  | 0,180811828 |  |
| 1569142_at   | TRIM13           | 0,020670649  | -0,160136748 | 0,180807398 |  |
| 207555_s_at  | TBXA2R           | 0,020670649  | -0,160136748 | 0,180807398 |  |
| 217395_at    | MT4              | 0,020670649  | -0,160136748 | 0,180807398 |  |
| 242725_at    | -                | 1,168140757  | 0,987376598  | 0,18076416  |  |
| 212513_s_at  | USP33            | 4,702455242  | 4,52176814   | 0,180687102 |  |
| 205401_at    | AGPS             | 3,248232277  | 3,067567462  | 0,180664814 |  |

|              |                 |              |              |             |  |
|--------------|-----------------|--------------|--------------|-------------|--|
| 1559530_at   | -               | 0,384950573  | 0,204310755  | 0,180639818 |  |
| 217164_at    | -               | 0,384950573  | 0,204310755  | 0,180639818 |  |
| 227380_x_at  | C16orf13        | 0,384950573  | 0,204310755  | 0,180639818 |  |
| 37424_at     | CCHCR1          | 1,94340061   | 1,762812816  | 0,180587794 |  |
| 220165_at    | INO80D          | 0,67554678   | 0,495031851  | 0,180514929 |  |
| 234728_s_at  | DHX35           | 0,67554678   | 0,495031851  | 0,180514929 |  |
| 213309_at    | PLCL2           | 2,303618506  | 2,123108223  | 0,180510283 |  |
| 214151_s_at  | CCPG1 /// DYX10 | 1,261018186  | 1,080561626  | 0,18045656  |  |
| 203777_s_at  | RPS6KB2         | 0,917308734  | 0,73688026   | 0,180428474 |  |
| 217051_s_at  | -               | 0,917308734  | 0,73688026   | 0,180428474 |  |
| 234976_x_at  | MTHFD2          | 0,917308734  | 0,73688026   | 0,180428474 |  |
| 218479_s_at  | XPO4            | 1,426552034  | 1,246149888  | 0,180402146 |  |
| 201948_at    | GNL2            | 3,619279389  | 3,439026336  | 0,180253053 |  |
| 212995_x_at  | MZT2A /// MZT2B | 4,471257399  | 4,291026333  | 0,180231066 |  |
| 212084_at    | TEX261          | 1,504602299  | 1,324440845  | 0,180161454 |  |
| 202890_at    | MAP7            | 2,001086023  | 1,820984782  | 0,180101241 |  |
| 1554686_at   | STAU2           | -2,667025278 | -2,847001814 | 0,179976537 |  |
| 1555210_at   | DTWD1           | -2,667025278 | -2,847001814 | 0,179976537 |  |
| 1557580_at   | -               | -2,667025278 | -2,847001814 | 0,179976537 |  |
| 1557597_at   | LOC100289211    | -2,667025278 | -2,847001814 | 0,179976537 |  |
| 1560265_at   | GRIK2           | -2,667025278 | -2,847001814 | 0,179976537 |  |
| 1560543_at   | GRK4            | -2,667025278 | -2,847001814 | 0,179976537 |  |
| 1563099_at   | LOC100507053    | -2,667025278 | -2,847001814 | 0,179976537 |  |
| 1565698_at   | HECTD2          | -2,667025278 | -2,847001814 | 0,179976537 |  |
| 1566190_at   | SUZ12           | -2,667025278 | -2,847001814 | 0,179976537 |  |
| 1570020_at   | AACSP1          | -2,667025278 | -2,847001814 | 0,179976537 |  |
| 211187_at    | -               | -2,667025278 | -2,847001814 | 0,179976537 |  |
| 216136_at    | -               | -2,667025278 | -2,847001814 | 0,179976537 |  |
| 216712_at    | SLC25A30        | -2,667025278 | -2,847001814 | 0,179976537 |  |
| 240848_at    | -               | -2,667025278 | -2,847001814 | 0,179976537 |  |
| 241873_at    | -               | -2,667025278 | -2,847001814 | 0,179976537 |  |
| 243081_at    | LOC100652770    | -2,667025278 | -2,847001814 | 0,179976537 |  |
| 243678_at    | -               | -2,667025278 | -2,847001814 | 0,179976537 |  |
| 244295_at    | -               | -2,667025278 | -2,847001814 | 0,179976537 |  |
| 244314_at    | -               | -2,667025278 | -2,847001814 | 0,179976537 |  |
| 226224_at    | FO XK2          | 2,410880861  | 2,230931691  | 0,17994917  |  |
| 221264_s_at  | TARDBP          | 1,578645857  | 1,398700978  | 0,179944879 |  |
| 203995_at    | C21orf2         | 0,613492853  | 0,433557298  | 0,179935555 |  |
| 224092_at    | BARHL1          | 0,613492853  | 0,433557298  | 0,179935555 |  |
| 1556345_s_at | -               | 0,30867765   | 0,128747141  | 0,179930509 |  |
| 1558782_a_at | LOC100130557    | 0,30867765   | 0,128747141  | 0,179930509 |  |
| 214411_x_at  | CTRB2           | 0,30867765   | 0,128747141  | 0,179930509 |  |
| 222823_at    | IPPK            | 0,30867765   | 0,128747141  | 0,179930509 |  |
| 200004_at    | EIF4G2          | 6,906545318  | 6,726680737  | 0,17986458  |  |
| 1552335_at   | CATSPER1        | -0,078265071 | -0,258114234 | 0,179849162 |  |
| 208229_at    | FGFR2           | -0,078265071 | -0,258114234 | 0,179849162 |  |
| 222648_at    | TBC1D16         | -0,078265071 | -0,258114234 | 0,179849162 |  |
| 229369_at    | VSIG2           | -0,078265071 | -0,258114234 | 0,179849162 |  |
| 232619_at    | ACTL10          | -0,078265071 | -0,258114234 | 0,179849162 |  |
| 202675_at    | SDHB            | 4,462972394  | 4,283151707  | 0,179820686 |  |
| 207620_s_at  | CASK            | 1,129248302  | 0,949447784  | 0,179800518 |  |
| 235589_s_at  | MDM4            | 1,649074067  | 1,469325098  | 0,179748969 |  |
| 213175_s_at  | SNRPB           | 6,886141249  | 6,706467992  | 0,179673258 |  |
| 1554864_a_at | SDC3            | -0,467091869 | -0,646746079 | 0,17965421  |  |
| 1557590_at   | PARD6G-AS1      | -0,467091869 | -0,646746079 | 0,17965421  |  |
| 201287_s_at  | SDC1            | -0,467091869 | -0,646746079 | 0,17965421  |  |

|              |                  |              |              |             |  |
|--------------|------------------|--------------|--------------|-------------|--|
| 209979_at    | ADARB1           | -0,467091869 | -0,646746079 | 0,17965421  |  |
| 221139_s_at  | CSAD             | -0,467091869 | -0,646746079 | 0,17965421  |  |
| 224501_at    | C1orf170         | -0,467091869 | -0,646746079 | 0,17965421  |  |
| 234365_at    | -                | -0,467091869 | -0,646746079 | 0,17965421  |  |
| 240012_at    | -                | -0,467091869 | -0,646746079 | 0,17965421  |  |
| 244726_at    | -                | -0,467091869 | -0,646746079 | 0,17965421  |  |
| 209487_at    | RBPMS            | 0,747935635  | 0,568365095  | 0,17957054  |  |
| 216902_s_at  | RRN3 /// RRN3P   | 2,993291442  | 2,813804482  | 0,17948696  |  |
| 210970_s_at  | IBTK             | 4,156452062  | 3,977034308  | 0,179417755 |  |
| 32062_at     | LRRC14           | 1,473887017  | 1,294497133  | 0,179389884 |  |
| 1565537_at   | NKX1-1           | 0,133056859  | -0,046302147 | 0,179359005 |  |
| 1569106_s_at | SETD5            | 0,133056859  | -0,046302147 | 0,179359005 |  |
| 213406_at    | WSB1             | 0,133056859  | -0,046302147 | 0,179359005 |  |
| 224832_at    | DUSP16           | 0,133056859  | -0,046302147 | 0,179359005 |  |
| 1555762_s_at | RBM15            | 3,416167722  | 3,236821511  | 0,179346211 |  |
| 207156_at    | HIST1H2AG /// H  | 2,416948786  | 2,237691445  | 0,179257341 |  |
| 228916_at    | CWF19L2          | 2,109966786  | 1,930732138  | 0,179234649 |  |
| 204979_s_at  | SH3BGR           | 1,549482847  | 1,370274469  | 0,179208378 |  |
| 209836_x_at  | BOLA2 /// BOLA2  | 5,149552753  | 4,970362234  | 0,179190519 |  |
| 218382_s_at  | U2AF2            | 2,857110344  | 2,677924589  | 0,179185754 |  |
| 201885_s_at  | CYB5R3           | 4,504404673  | 4,32527877   | 0,179125903 |  |
| 214306_at    | OPA1             | 2,47626436   | 2,297144887  | 0,179119473 |  |
| 225745_at    | LRP6             | 2,970093718  | 2,791007185  | 0,179086534 |  |
| 1553172_at   | ZNF777           | 2,901063789  | 2,721978587  | 0,179085203 |  |
| 212505_s_at  | MAU2             | 2,671625168  | 2,492544876  | 0,179080292 |  |
| 212247_at    | NUP205           | 4,933058485  | 4,754031948  | 0,179026537 |  |
| 222318_at    | ZNF324B          | 0,984222186  | 0,805216064  | 0,179006122 |  |
| 208691_at    | TFRC             | 7,787148788  | 7,60818245   | 0,178966338 |  |
| 223319_at    | GPHN             | 3,037284587  | 2,858346012  | 0,178938575 |  |
| 220007_at    | METTL8           | 1,515954005  | 1,337086025  | 0,17886798  |  |
| 226197_at    | AR               | 2,959046717  | 2,780243895  | 0,178802822 |  |
| 214266_s_at  | PDLIM7           | 0,401366113  | 0,222599095  | 0,178767018 |  |
| 215281_x_at  | POGZ             | 0,401366113  | 0,222599095  | 0,178767018 |  |
| 219499_at    | SEC61A2          | 0,401366113  | 0,222599095  | 0,178767018 |  |
| 223316_at    | CCDC3            | 0,401366113  | 0,222599095  | 0,178767018 |  |
| 224864_at    | SRA1             | 3,319065909  | 3,140317145  | 0,178748764 |  |
| 219382_at    | SERTAD3          | 2,232003119  | 2,053299695  | 0,178703424 |  |
| 226840_at    | H2AFY            | 1,40228911   | 1,223626587  | 0,178662522 |  |
| 204387_x_at  | MRP63            | 2,16388051   | 1,98530622   | 0,17857429  |  |
| 214281_s_at  | RCHY1            | 4,11599613   | 3,937445604  | 0,178550526 |  |
| 224802_at    | NDFIP2           | 3,891817836  | 3,713295978  | 0,178521858 |  |
| 239386_at    | HAVCR1P1         | 0,555999837  | 0,377530647  | 0,17846919  |  |
| 236312_at    | -                | 1,556829052  | 1,378453643  | 0,178375408 |  |
| 222990_at    | UBQLN1           | 4,864780677  | 4,686464402  | 0,178316275 |  |
| 224315_at    | DDX20            | 1,820612054  | 1,642321262  | 0,178290792 |  |
| 1569793_at   | SLC25A18         | -0,83191556  | -1,010192375 | 0,178276815 |  |
| 202999_s_at  | LOXL2            | -0,83191556  | -1,010192375 | 0,178276815 |  |
| 211868_x_at  | IGH@ /// IGHA1 / | -0,83191556  | -1,010192375 | 0,178276815 |  |
| 216890_at    | -                | -0,83191556  | -1,010192375 | 0,178276815 |  |
| 225739_at    | RAB11FIP4        | -0,83191556  | -1,010192375 | 0,178276815 |  |
| 225815_at    | CPLX2            | -0,83191556  | -1,010192375 | 0,178276815 |  |
| 229034_at    | SOBP             | -0,83191556  | -1,010192375 | 0,178276815 |  |
| 233286_at    | -                | -0,83191556  | -1,010192375 | 0,178276815 |  |
| 239262_at    | -                | -0,83191556  | -1,010192375 | 0,178276815 |  |
| 239734_at    | -                | -0,83191556  | -1,010192375 | 0,178276815 |  |
| 241600_at    | WIPF3            | -0,83191556  | -1,010192375 | 0,178276815 |  |

|              |              |              |              |             |  |
|--------------|--------------|--------------|--------------|-------------|--|
| 242184_s_at  | -            | -0,83191556  | -1,010192375 | 0,178276815 |  |
| 244520_at    | -            | -0,83191556  | -1,010192375 | 0,178276815 |  |
| 218799_at    | GPN2         | 2,043538949  | 1,865308541  | 0,178230408 |  |
| 207499_x_at  | UNC45A       | 0,695652136  | 0,51742585   | 0,178226286 |  |
| 219618_at    | IRAK4        | 0,695652136  | 0,51742585   | 0,178226286 |  |
| 221529_s_at  | PLVAP        | 0,695652136  | 0,51742585   | 0,178226286 |  |
| 231258_at    | LOC100653229 | 0,695652136  | 0,51742585   | 0,178226286 |  |
| 208918_s_at  | NADK         | 4,069245099  | 3,891034012  | 0,178211087 |  |
| 1553978_at   | MEF2BNB      | 1,880387527  | 1,702196344  | 0,178191183 |  |
| 217981_s_at  | FXC1         | 2,540666392  | 2,362515214  | 0,178151178 |  |
| 1557802_at   | -            | -2,712026959 | -2,89013181  | 0,178104851 |  |
| 1568190_at   | -            | -2,712026959 | -2,89013181  | 0,178104851 |  |
| 1569186_at   | MYO3A        | -2,712026959 | -2,89013181  | 0,178104851 |  |
| 1570471_at   | ARHGEF12     | -2,712026959 | -2,89013181  | 0,178104851 |  |
| 210931_at    | RNF6         | -2,712026959 | -2,89013181  | 0,178104851 |  |
| 217392_at    | -            | -2,712026959 | -2,89013181  | 0,178104851 |  |
| 217506_at    | -            | -2,712026959 | -2,89013181  | 0,178104851 |  |
| 217537_x_at  | -            | -2,712026959 | -2,89013181  | 0,178104851 |  |
| 223962_at    | TTC29        | -2,712026959 | -2,89013181  | 0,178104851 |  |
| 230783_at    | LOC283713    | -2,712026959 | -2,89013181  | 0,178104851 |  |
| 233682_at    | -            | -2,712026959 | -2,89013181  | 0,178104851 |  |
| 236280_at    | -            | -2,712026959 | -2,89013181  | 0,178104851 |  |
| 236575_at    | ARHGEF26-AS1 | -2,712026959 | -2,89013181  | 0,178104851 |  |
| 240735_at    | CDC42BPA     | -2,712026959 | -2,89013181  | 0,178104851 |  |
| 240980_at    | -            | -2,712026959 | -2,89013181  | 0,178104851 |  |
| 241194_at    | -            | -2,712026959 | -2,89013181  | 0,178104851 |  |
| 243125_x_at  | -            | -2,712026959 | -2,89013181  | 0,178104851 |  |
| 244749_at    | -            | -2,712026959 | -2,89013181  | 0,178104851 |  |
| 235084_x_at  | TRIM38       | 0,882651021  | 0,704715219  | 0,177935802 |  |
| 51228_at     | RBM12B       | 1,730911019  | 1,553004872  | 0,177906147 |  |
| 201385_at    | DHX15        | 6,064530481  | 5,886682232  | 0,177848249 |  |
| 226671_at    | LAMP2        | 1,912238072  | 1,73441697   | 0,177821102 |  |
| 1552257_a_at | TTLL12       | 2,763383302  | 2,585563171  | 0,177820131 |  |
| 213437_at    | RUFY3        | 1,369290453  | 1,191491281  | 0,177799172 |  |
| 226206_at    | MAFK         | 0,995078803  | 0,817300337  | 0,177778466 |  |
| 226270_at    | EXOC2        | 2,171078719  | 1,993317152  | 0,177761567 |  |
| 209003_at    | SLC25A11     | 2,535098095  | 2,357351836  | 0,177746259 |  |
| 1555961_a_at | HINT1        | 5,817728115  | 5,640280705  | 0,17744741  |  |
| 222846_at    | RAB8B        | 3,19743497   | 3,019999252  | 0,177435717 |  |
| 203234_at    | UPP1         | 2,243430036  | 2,066015817  | 0,177414219 |  |
| 232591_s_at  | TMEM30A      | 3,025418883  | 2,848075314  | 0,177343569 |  |
| 1554266_at   | -            | -0,172274514 | -0,34958478  | 0,177310267 |  |
| 1560006_a_at | LOC646762    | -0,172274514 | -0,34958478  | 0,177310267 |  |
| 1560065_at   | PAIP2        | -0,172274514 | -0,34958478  | 0,177310267 |  |
| 214443_at    | PVR          | -0,172274514 | -0,34958478  | 0,177310267 |  |
| 219319_at    | HIF3A        | -0,172274514 | -0,34958478  | 0,177310267 |  |
| 226162_at    | SLC30A6      | -0,172274514 | -0,34958478  | 0,177310267 |  |
| 228436_at    | KCNC4        | -0,172274514 | -0,34958478  | 0,177310267 |  |
| 234159_at    | -            | -0,172274514 | -0,34958478  | 0,177310267 |  |
| 236224_at    | RIT1         | -0,172274514 | -0,34958478  | 0,177310267 |  |
| 241385_at    | LARP7        | -0,172274514 | -0,34958478  | 0,177310267 |  |
| 210418_s_at  | IDH3B        | 4,363324083  | 4,186016868  | 0,177307216 |  |
| 203115_at    | FECH         | 0,945567441  | 0,768343791  | 0,177223651 |  |
| 225685_at    | CDC42EP3     | 3,164152611  | 2,986947093  | 0,177205518 |  |
| 202123_s_at  | ABL1         | 2,688444421  | 2,511262629  | 0,177181792 |  |
| 201977_s_at  | KIAA0141     | 0,152582607  | -0,024572586 | 0,177155193 |  |

|              |                  |             |              |             |  |
|--------------|------------------|-------------|--------------|-------------|--|
| 203439_s_at  | STC2             | 0,152582607 | -0,024572586 | 0,177155193 |  |
| 207641_at    | TNFRSF13B        | 0,152582607 | -0,024572586 | 0,177155193 |  |
| 222277_at    | C1QTNF9B-AS1     | 0,152582607 | -0,024572586 | 0,177155193 |  |
| 243210_at    | -                | 0,152582607 | -0,024572586 | 0,177155193 |  |
| 224200_s_at  | RAD18            | 1,567778694 | 1,390636111  | 0,177142583 |  |
| 1555867_at   | GNG4             | 1,05337236  | 0,876248481  | 0,177123878 |  |
| 223179_at    | YPEL3            | 1,05337236  | 0,876248481  | 0,177123878 |  |
| 237299_at    | -                | 2,396622324 | 2,21959457   | 0,177027753 |  |
| 218175_at    | CCDC92           | 1,177702228 | 1,000684521  | 0,177017706 |  |
| 227912_s_at  | EXOSC3           | 1,177702228 | 1,000684521  | 0,177017706 |  |
| 203792_x_at  | PCGF2            | 0,334552598 | 0,157549243  | 0,177003355 |  |
| 221555_x_at  | CDC14B           | 0,334552598 | 0,157549243  | 0,177003355 |  |
| 235441_at    | -                | 0,334552598 | 0,157549243  | 0,177003355 |  |
| 244498_x_at  | LOC100505679     | 0,334552598 | 0,157549243  | 0,177003355 |  |
| 221847_at    | LOC100129361     | 4,381538373 | 4,204537151  | 0,177001222 |  |
| 216342_x_at  | -                | 6,735067082 | 6,558078739  | 0,176988343 |  |
| 203654_s_at  | COIL             | 3,648798054 | 3,471887144  | 0,17691091  |  |
| 235302_at    | C14orf118        | 1,534677255 | 1,3579181    | 0,176759155 |  |
| 211561_x_at  | MAPK14           | 1,607231019 | 1,43051703   | 0,176713989 |  |
| 244663_at    | -                | 1,607231019 | 1,43051703   | 0,176713989 |  |
| 225265_at    | RBMS1            | 1,67631007  | 1,499637023  | 0,176673048 |  |
| 201953_at    | CIB1             | 4,044635894 | 3,86798237   | 0,176653524 |  |
| 211033_s_at  | PEX7             | 2,693452197 | 2,516830926  | 0,176621272 |  |
| 1558906_a_at | LOC100505783     | -0,43775896 | -0,614371577 | 0,176612616 |  |
| 207028_at    | MYCNOS           | -0,43775896 | -0,614371577 | 0,176612616 |  |
| 213050_at    | COBL             | -0,43775896 | -0,614371577 | 0,176612616 |  |
| 216552_x_at  | KIR2DS4          | -0,43775896 | -0,614371577 | 0,176612616 |  |
| 223755_at    | KIRREL2          | -0,43775896 | -0,614371577 | 0,176612616 |  |
| 230736_at    | LOC387647        | -0,43775896 | -0,614371577 | 0,176612616 |  |
| 234287_at    | -                | -0,43775896 | -0,614371577 | 0,176612616 |  |
| 236636_at    | -                | -0,43775896 | -0,614371577 | 0,176612616 |  |
| 237053_at    | SYNDIG1L         | -0,43775896 | -0,614371577 | 0,176612616 |  |
| 241024_at    | C6orf147 /// KHD | -0,43775896 | -0,614371577 | 0,176612616 |  |
| 222605_at    | RCOR3            | 1,894952274 | 1,718396606  | 0,176555668 |  |
| 241751_at    | OFD1             | 1,894952274 | 1,718396606  | 0,176555668 |  |
| 226795_at    | LRCH1            | 1,951783949 | 1,775255987  | 0,176527961 |  |
| 226421_at    | AMMECR1          | 5,46595713  | 5,289461962  | 0,176495167 |  |
| 209679_s_at  | SMAGP            | 2,084778276 | 1,908311039  | 0,176467237 |  |
| 227418_at    | MSANTD4          | 3,171349466 | 2,994948944  | 0,176400522 |  |
| 205167_s_at  | CDC25C           | 1,575032557 | 1,398700978  | 0,176331578 |  |
| 221873_at    | ZNF143           | 3,034656185 | 2,858346012  | 0,176310173 |  |
| 223000_s_at  | F11R             | 4,213343045 | 4,037037849  | 0,176305196 |  |
| 200989_at    | HIF1A            | 5,721216542 | 5,544941426  | 0,176275116 |  |
| 200661_at    | CTSA             | 3,761974695 | 3,585762986  | 0,176211709 |  |
| 213532_at    | ADAM17           | 2,912562019 | 2,7363693    | 0,176192719 |  |
| 202783_at    | NNT              | 2,208874124 | 2,032717854  | 0,17615627  |  |
| 1557265_at   | -                | 0,255492549 | 0,079428135  | 0,176064414 |  |
| 240221_at    | CSNK1A1          | 0,255492549 | 0,079428135  | 0,176064414 |  |
| 202266_at    | TDP2             | 4,798543046 | 4,622479552  | 0,176063495 |  |
| 217187_at    | MUC5AC           | 0,425644434 | 0,249604176  | 0,176040258 |  |
| 227829_at    | GYLTL1B          | 0,425644434 | 0,249604176  | 0,176040258 |  |
| 209137_s_at  | USP10            | 3,076146581 | 2,900133867  | 0,176012714 |  |
| 210778_s_at  | MIR4800 /// MXD  | 0,779676066 | 0,603679647  | 0,175996419 |  |
| 212285_s_at  | AGRN             | 0,779676066 | 0,603679647  | 0,175996419 |  |
| 230521_at    | C9orf100         | 0,779676066 | 0,603679647  | 0,175996419 |  |
| 215082_at    | ELOVL5           | 0,900083947 | 0,724100169  | 0,175983778 |  |

|              |                  |              |              |             |  |
|--------------|------------------|--------------|--------------|-------------|--|
| 229856_s_at  | PITHD1           | 1,163336153  | 0,987376598  | 0,175959556 |  |
| 235147_at    | -                | 1,748661581  | 1,572742379  | 0,175919202 |  |
| 221490_at    | UBAP1            | 1,841816345  | 1,665902186  | 0,17591416  |  |
| 212111_at    | STX12            | 2,064305961  | 1,888402606  | 0,175903355 |  |
| 1553967_at   | ADAT3            | -0,285837228 | -0,461594427 | 0,175757198 |  |
| 1566949_at   | -                | -0,285837228 | -0,461594427 | 0,175757198 |  |
| 202398_at    | AP3S2 /// C15orf | -0,285837228 | -0,461594427 | 0,175757198 |  |
| 207306_at    | TCF15            | -0,285837228 | -0,461594427 | 0,175757198 |  |
| 211215_x_at  | DIO2             | -0,285837228 | -0,461594427 | 0,175757198 |  |
| 213930_at    | ATG12            | -0,285837228 | -0,461594427 | 0,175757198 |  |
| 220122_at    | MCTP1            | -0,285837228 | -0,461594427 | 0,175757198 |  |
| 238816_at    | PSEN1            | -0,285837228 | -0,461594427 | 0,175757198 |  |
| 240129_at    | -                | -0,285837228 | -0,461594427 | 0,175757198 |  |
| 218845_at    | DUSP22           | 3,506195778  | 3,330438773  | 0,175757005 |  |
| 202405_at    | TIAL1            | 2,259277178  | 2,083632167  | 0,175645011 |  |
| 1557954_at   | TXLNG            | 3,315822132  | 3,140317145  | 0,175504987 |  |
| 1557065_at   | YLPM1            | 1,390002893  | 1,214517879  | 0,175485015 |  |
| 223072_s_at  | INO80B /// INO80 | 1,390002893  | 1,214517879  | 0,175485015 |  |
| 224976_at    | NFIA             | 1,390002893  | 1,214517879  | 0,175485015 |  |
| 228283_at    | CMC1             | 3,574742007  | 3,399383202  | 0,175358805 |  |
| 212183_at    | NUDT4            | 2,41290634   | 2,237691445  | 0,175214894 |  |
| 236261_at    | OSBPL6           | 2,41290634   | 2,237691445  | 0,175214894 |  |
| 200736_s_at  | GPX1             | 5,828105858  | 5,652979126  | 0,175126732 |  |
| 1553654_at   | SYT14            | -2,779459409 | -2,954576755 | 0,175117347 |  |
| 1554492_at   | THADA            | -2,779459409 | -2,954576755 | 0,175117347 |  |
| 1556417_a_at | -                | -2,779459409 | -2,954576755 | 0,175117347 |  |
| 1558971_at   | THEMIS           | -2,779459409 | -2,954576755 | 0,175117347 |  |
| 1559890_a_at | ABI1             | -2,779459409 | -2,954576755 | 0,175117347 |  |
| 1561289_at   | LOC286370        | -2,779459409 | -2,954576755 | 0,175117347 |  |
| 1561316_at   | GABRB3           | -2,779459409 | -2,954576755 | 0,175117347 |  |
| 1561606_at   | -                | -2,779459409 | -2,954576755 | 0,175117347 |  |
| 1563033_x_at | -                | -2,779459409 | -2,954576755 | 0,175117347 |  |
| 1565346_a_at | ATP1A4           | -2,779459409 | -2,954576755 | 0,175117347 |  |
| 1565596_at   | -                | -2,779459409 | -2,954576755 | 0,175117347 |  |
| 1569405_at   | -                | -2,779459409 | -2,954576755 | 0,175117347 |  |
| 1570015_at   | RP11-165H20.1    | -2,779459409 | -2,954576755 | 0,175117347 |  |
| 215457_at    | -                | -2,779459409 | -2,954576755 | 0,175117347 |  |
| 219934_s_at  | SULT1E1          | -2,779459409 | -2,954576755 | 0,175117347 |  |
| 224148_at    | FYB              | -2,779459409 | -2,954576755 | 0,175117347 |  |
| 232161_x_at  | PTPN4            | -2,779459409 | -2,954576755 | 0,175117347 |  |
| 232380_at    | FGGY             | -2,779459409 | -2,954576755 | 0,175117347 |  |
| 232945_at    | PUS10            | -2,779459409 | -2,954576755 | 0,175117347 |  |
| 233910_at    | TMEFF2           | -2,779459409 | -2,954576755 | 0,175117347 |  |
| 239661_at    | -                | -2,779459409 | -2,954576755 | 0,175117347 |  |
| 240395_at    | LOC100128727     | -2,779459409 | -2,954576755 | 0,175117347 |  |
| 1569396_at   | RAB40C           | 0,351548291  | 0,176436073  | 0,175112218 |  |
| 215931_s_at  | ARFGEF2          | 0,351548291  | 0,176436073  | 0,175112218 |  |
| 1557986_s_at | SMCR8            | -1,089016378 | -1,264005341 | 0,174988963 |  |
| 1563117_at   | LOC388456        | -1,089016378 | -1,264005341 | 0,174988963 |  |
| 227468_at    | CPT1C            | -1,089016378 | -1,264005341 | 0,174988963 |  |
| 229413_s_at  | -                | -1,089016378 | -1,264005341 | 0,174988963 |  |
| 234173_s_at  | NXF2 /// NXF2B   | -1,089016378 | -1,264005341 | 0,174988963 |  |
| 236949_at    | -                | -1,089016378 | -1,264005341 | 0,174988963 |  |
| 237752_at    | -                | -1,089016378 | -1,264005341 | 0,174988963 |  |
| 238749_at    | -                | -1,089016378 | -1,264005341 | 0,174988963 |  |
| 238788_at    | LOC494150        | -1,089016378 | -1,264005341 | 0,174988963 |  |



|              |                  |              |              |             |  |
|--------------|------------------|--------------|--------------|-------------|--|
| 241783_at    | -                | -1,089016378 | -1,264005341 | 0,174988963 |  |
| 221497_x_at  | EGLN1            | 1,965648824  | 1,790660532  | 0,174988292 |  |
| 1553148_a_at | SNX13            | -0,59053611  | -0,765504029 | 0,174967919 |  |
| 1567253_at   | OR10D3           | -0,59053611  | -0,765504029 | 0,174967919 |  |
| 1568742_at   | -                | -0,59053611  | -0,765504029 | 0,174967919 |  |
| 200671_s_at  | SPTBN1           | -0,59053611  | -0,765504029 | 0,174967919 |  |
| 203541_s_at  | KLF9             | -0,59053611  | -0,765504029 | 0,174967919 |  |
| 203685_at    | BCL2             | -0,59053611  | -0,765504029 | 0,174967919 |  |
| 204553_x_at  | INPP4A           | -0,59053611  | -0,765504029 | 0,174967919 |  |
| 209950_s_at  | VILL             | -0,59053611  | -0,765504029 | 0,174967919 |  |
| 212278_x_at  | UBE3A            | -0,59053611  | -0,765504029 | 0,174967919 |  |
| 227287_at    | CITED2           | -0,59053611  | -0,765504029 | 0,174967919 |  |
| 232030_at    | EPG5             | -0,59053611  | -0,765504029 | 0,174967919 |  |
| 236501_at    | -                | -0,59053611  | -0,765504029 | 0,174967919 |  |
| 241842_x_at  | C19orf45         | -0,59053611  | -0,765504029 | 0,174967919 |  |
| 221346_at    | OR10J1           | 0,072842263  | -0,102100538 | 0,1749428   |  |
| 238340_at    | DCAF8            | 0,072842263  | -0,102100538 | 0,1749428   |  |
| 241427_x_at  | -                | 0,072842263  | -0,102100538 | 0,1749428   |  |
| 241666_at    | C3orf23          | 0,072842263  | -0,102100538 | 0,1749428   |  |
| 1553096_s_at | BCL2L11          | 2,266015882  | 2,091116676  | 0,174899206 |  |
| 212119_at    | RHOQ             | 1,789769151  | 1,614891062  | 0,174878089 |  |
| 225614_at    | SAAL1            | 3,266269388  | 3,091398163  | 0,174871225 |  |
| 209375_at    | XPC              | 2,173470163  | 1,998633167  | 0,174836996 |  |
| 218661_at    | NAA60            | 2,173470163  | 1,998633167  | 0,174836996 |  |
| 222583_s_at  | NUP50            | 1,69307511   | 1,518263577  | 0,174811533 |  |
| 215227_x_at  | ACP1             | 5,278173421  | 5,10337687   | 0,174796551 |  |
| 230542_at    | ZNF597           | 1,021868205  | 0,847075464  | 0,174792741 |  |
| 226532_at    | -                | 2,710020346  | 2,53523821   | 0,174782136 |  |
| 202362_at    | RAP1A            | 4,94360513   | 4,768885987  | 0,174719143 |  |
| 1554286_at   | FLJ25758         | -0,148196756 | -0,322870281 | 0,174673525 |  |
| 215857_at    | NCLN             | -0,148196756 | -0,322870281 | 0,174673525 |  |
| 217629_at    | -                | -0,148196756 | -0,322870281 | 0,174673525 |  |
| 221945_at    | FBXO41           | -0,148196756 | -0,322870281 | 0,174673525 |  |
| 232659_at    | -                | -0,148196756 | -0,322870281 | 0,174673525 |  |
| 235058_at    | -                | -0,148196756 | -0,322870281 | 0,174673525 |  |
| 241849_at    | -                | -0,148196756 | -0,322870281 | 0,174673525 |  |
| 242806_at    | -                | -0,148196756 | -0,322870281 | 0,174673525 |  |
| 224654_at    | DDX21            | 6,187498665  | 6,012888334  | 0,174610332 |  |
| 205269_at    | LCP2             | 2,883642771  | 2,709065209  | 0,174577561 |  |
| 1552531_a_at | NLRP11           | -1,688127507 | -1,862647763 | 0,174520256 |  |
| 1553254_at   | MAGEE2           | -1,688127507 | -1,862647763 | 0,174520256 |  |
| 1558470_at   | VWA3B            | -1,688127507 | -1,862647763 | 0,174520256 |  |
| 1559309_at   | MCFD2            | -1,688127507 | -1,862647763 | 0,174520256 |  |
| 1560253_at   | LHX9             | -1,688127507 | -1,862647763 | 0,174520256 |  |
| 1561894_at   | C7orf49 /// LOC6 | -1,688127507 | -1,862647763 | 0,174520256 |  |
| 1569789_at   | -                | -1,688127507 | -1,862647763 | 0,174520256 |  |
| 1570158_at   | -                | -1,688127507 | -1,862647763 | 0,174520256 |  |
| 203980_at    | FABP4            | -1,688127507 | -1,862647763 | 0,174520256 |  |
| 206736_x_at  | CHRNA4           | -1,688127507 | -1,862647763 | 0,174520256 |  |
| 206815_at    | SPAG8            | -1,688127507 | -1,862647763 | 0,174520256 |  |
| 206996_x_at  | CACNB1           | -1,688127507 | -1,862647763 | 0,174520256 |  |
| 216281_at    | DICER1           | -1,688127507 | -1,862647763 | 0,174520256 |  |
| 220414_at    | CALML5           | -1,688127507 | -1,862647763 | 0,174520256 |  |
| 220580_at    | BICC1            | -1,688127507 | -1,862647763 | 0,174520256 |  |
| 222328_x_at  | -                | -1,688127507 | -1,862647763 | 0,174520256 |  |
| 229584_at    | LRRK2            | -1,688127507 | -1,862647763 | 0,174520256 |  |

|              |                |              |              |             |  |
|--------------|----------------|--------------|--------------|-------------|--|
| 231532_at    | -              | -1,688127507 | -1,862647763 | 0,174520256 |  |
| 231535_x_at  | ROPN1          | -1,688127507 | -1,862647763 | 0,174520256 |  |
| 232006_at    | STK35          | -1,688127507 | -1,862647763 | 0,174520256 |  |
| 235016_at    | REEP3          | -1,688127507 | -1,862647763 | 0,174520256 |  |
| 237662_at    | -              | -1,688127507 | -1,862647763 | 0,174520256 |  |
| 239584_at    | -              | -1,688127507 | -1,862647763 | 0,174520256 |  |
| 240945_at    | -              | -1,688127507 | -1,862647763 | 0,174520256 |  |
| 244494_at    | -              | -1,688127507 | -1,862647763 | 0,174520256 |  |
| 203594_at    | RTCA           | 4,63204053   | 4,457591096  | 0,174449434 |  |
| 235514_at    | ASPRV1         | 0,592200562  | 0,417770464  | 0,174430098 |  |
| 212899_at    | CDK19          | 2,400710591  | 2,226407528  | 0,174303063 |  |
| 205521_at    | EXOG           | 0,44160593   | 0,26733076   | 0,17427517  |  |
| 226643_s_at  | NUDCD2         | 1,079110292  | 0,904843258  | 0,174267034 |  |
| 227112_at    | TMCC1          | 1,079110292  | 0,904843258  | 0,174267034 |  |
| 226816_s_at  | KIAA1143       | 4,007586951  | 3,833443169  | 0,174143782 |  |
| 211922_s_at  | CAT            | 3,413135307  | 3,239069096  | 0,174066211 |  |
| 206756_at    | CHST7          | 1,318332599  | 1,144305291  | 0,174027308 |  |
| 228185_at    | ZNF25          | 0,181384709  | 0,007421914  | 0,173962795 |  |
| 214007_s_at  | TWF1           | 0,798390451  | 0,624460759  | 0,173929692 |  |
| 233250_x_at  | FOXRED2        | 0,798390451  | 0,624460759  | 0,173929692 |  |
| 236229_at    | -              | 0,798390451  | 0,624460759  | 0,173929692 |  |
| 212774_at    | ZNF238         | 2,750626925  | 2,576704359  | 0,173922565 |  |
| 216505_x_at  | -              | 5,986266443  | 5,812405975  | 0,173860468 |  |
| 202678_at    | GTF2A2         | 5,015848483  | 4,842054614  | 0,173793869 |  |
| 222126_at    | AGFG2          | 1,735773781  | 1,562009954  | 0,173763827 |  |
| 217945_at    | BTBD1          | 5,081147701  | 4,907457724  | 0,173689977 |  |
| 211208_s_at  | CASK           | 2,562727117  | 2,389070873  | 0,173656244 |  |
| 1556248_at   | FLJ33065       | -0,022466681 | -0,19610998  | 0,173643299 |  |
| 1560779_a_at | ZNF568         | -0,022466681 | -0,19610998  | 0,173643299 |  |
| 215607_x_at  | -              | -0,022466681 | -0,19610998  | 0,173643299 |  |
| 239017_at    | -              | -0,022466681 | -0,19610998  | 0,173643299 |  |
| 203926_x_at  | ATP5D          | 2,185368281  | 2,011838132  | 0,173530148 |  |
| 226399_at    | DNAJB14        | 2,185368281  | 2,011838132  | 0,173530148 |  |
| 206976_s_at  | HSPH1          | 5,893211151  | 5,719683585  | 0,173527566 |  |
| 217858_s_at  | ARMCX3         | 2,582657321  | 2,409170778  | 0,173486543 |  |
| 209787_s_at  | HMGN4          | 5,262252783  | 5,088808057  | 0,173444726 |  |
| 1552628_a_at | HERPUD2        | 1,923647937  | 1,750261389  | 0,173386548 |  |
| 203140_at    | BCL6           | 1,187200746  | 1,013870809  | 0,173329937 |  |
| 219237_s_at  | DNAJB14        | 1,672933557  | 1,499637023  | 0,173296534 |  |
| 201761_at    | MTHFD2         | 5,605105329  | 5,431842482  | 0,173262847 |  |
| 1561676_at   | PRICKLE2-AS3   | -2,823166348 | -2,996335703 | 0,173169355 |  |
| 1565743_at   | -              | -2,823166348 | -2,996335703 | 0,173169355 |  |
| 1566101_at   | TTLL5          | -2,823166348 | -2,996335703 | 0,173169355 |  |
| 1567248_at   | OR9A1P         | -2,823166348 | -2,996335703 | 0,173169355 |  |
| 1569858_at   | -              | -2,823166348 | -2,996335703 | 0,173169355 |  |
| 1570082_x_at | -              | -2,823166348 | -2,996335703 | 0,173169355 |  |
| 214603_at    | MAGEA2 /// MAG | -2,823166348 | -2,996335703 | 0,173169355 |  |
| 234097_s_at  | ZNRD1-AS1      | -2,823166348 | -2,996335703 | 0,173169355 |  |
| 237250_at    | -              | -2,823166348 | -2,996335703 | 0,173169355 |  |
| 238732_at    | COL24A1        | -2,823166348 | -2,996335703 | 0,173169355 |  |
| 238922_at    | -              | -2,823166348 | -2,996335703 | 0,173169355 |  |
| 240649_at    | -              | -2,823166348 | -2,996335703 | 0,173169355 |  |
| 200624_s_at  | MATR3 /// SNHG | 5,710552306  | 5,537427697  | 0,17312461  |  |
| 227792_at    | ITPRIPL2       | 3,115233629  | 2,942125533  | 0,173108096 |  |
| 225838_at    | EPC2           | 2,86748657   | 2,694398145  | 0,173088426 |  |
| 223569_at    | PPAPDC1B       | 1,037706275  | 0,864649967  | 0,173056308 |  |

|              |                |              |              |             |
|--------------|----------------|--------------|--------------|-------------|
| 217996_at    | PHLDA1         | 4,67529113   | 4,502251705  | 0,173039426 |
| 204604_at    | CDK14          | 1,530951994  | 1,3579181    | 0,173033894 |
| 210676_x_at  | RGPD3 /// RGPD | 1,530951994  | 1,3579181    | 0,173033894 |
| 218854_at    | DSE            | 1,530951994  | 1,3579181    | 0,173033894 |
| 201001_s_at  | TMEM189 /// TM | 4,511983428  | 4,338964815  | 0,173018613 |
| 202646_s_at  | CSDE1          | 4,92704765   | 4,754031948  | 0,173015702 |
| 202283_at    | SERPINF1       | 1,709647566  | 1,536652708  | 0,172994858 |
| 218248_at    | FAM111A        | 2,166283906  | 1,993317152  | 0,172966754 |
| 225886_at    | DDX5           | 2,605861638  | 2,432926755  | 0,172934883 |
| 229625_at    | GBP5           | 1,238353345  | 1,065442793  | 0,172910552 |
| 221650_s_at  | MED18          | 1,454352496  | 1,281471383  | 0,172881113 |
| 1553642_at   | C9orf163       | 0,606430281  | 0,433557298  | 0,172872983 |
| 1555779_a_at | CD79A          | 0,606430281  | 0,433557298  | 0,172872983 |
| 214729_at    | TWISTNB        | 0,606430281  | 0,433557298  | 0,172872983 |
| 216271_x_at  | SYDE1          | 0,606430281  | 0,433557298  | 0,172872983 |
| 239294_at    | -              | 0,606430281  | 0,433557298  | 0,172872983 |
| 220941_s_at  | C21orf91       | 0,928678725  | 0,755840599  | 0,172838125 |
| 233101_at    | MTMR9          | 0,928678725  | 0,755840599  | 0,172838125 |
| 225022_at    | GOPC           | 3,642769857  | 3,469974737  | 0,17279512  |
| 202360_at    | MAML1          | 3,330897748  | 3,158242412  | 0,172655336 |
| 205486_at    | TESK2          | 2,014487247  | 1,841838775  | 0,172648473 |
| 222653_at    | PNPO           | 2,014487247  | 1,841838775  | 0,172648473 |
| 230504_at    | CEACAM19       | 1,094335495  | 0,921731975  | 0,17260352  |
| 238678_at    | FLJ45340       | 1,094335495  | 0,921731975  | 0,17260352  |
| 203116_s_at  | FECH           | 2,535098095  | 2,362515214  | 0,172582882 |
| 1555631_at   | -              | -1,047650486 | -1,220210588 | 0,172560102 |
| 1564264_at   | -              | -1,047650486 | -1,220210588 | 0,172560102 |
| 205957_at    | PLXNB3         | -1,047650486 | -1,220210588 | 0,172560102 |
| 206532_at    | -              | -1,047650486 | -1,220210588 | 0,172560102 |
| 208320_at    | CABP1          | -1,047650486 | -1,220210588 | 0,172560102 |
| 215488_at    | -              | -1,047650486 | -1,220210588 | 0,172560102 |
| 221456_at    | TAS2R3         | -1,047650486 | -1,220210588 | 0,172560102 |
| 224307_x_at  | MAGI3          | -1,047650486 | -1,220210588 | 0,172560102 |
| 230124_at    | PRKCH          | -1,047650486 | -1,220210588 | 0,172560102 |
| 230816_at    | FAM163B        | -1,047650486 | -1,220210588 | 0,172560102 |
| 235850_at    | FAM162A        | -1,047650486 | -1,220210588 | 0,172560102 |
| 237434_x_at  | MSANTD1        | -1,047650486 | -1,220210588 | 0,172560102 |
| 244309_at    | -              | -1,047650486 | -1,220210588 | 0,172560102 |
| 244417_at    | -              | -1,047650486 | -1,220210588 | 0,172560102 |
| 211931_s_at  | HNRNPA3 /// HN | 6,057264737  | 5,884709689  | 0,172555048 |
| 200864_s_at  | RAB11A         | 3,253893136  | 3,081412119  | 0,172481016 |
| 228305_at    | ZNF565         | 2,55541096   | 2,382985886  | 0,172425074 |
| 1553163_at   | ADPRHL1        | 0,376672223  | 0,204310755  | 0,172361468 |
| 243263_at    | LINC00482      | 0,376672223  | 0,204310755  | 0,172361468 |
| 244872_at    | RBBP4          | 0,376672223  | 0,204310755  | 0,172361468 |
| 223978_s_at  | CRLS1          | 4,84391367   | 4,671564559  | 0,172349111 |
| 218172_s_at  | DERL1          | 4,147356641  | 3,975013041  | 0,1723436   |
| 217866_at    | CPSF7          | 3,912008086  | 3,739727424  | 0,172280662 |
| 230110_at    | MCOLN2         | 1,716223609  | 1,543943227  | 0,172280381 |
| 33760_at     | PEX14          | 2,439975571  | 2,267724404  | 0,172251167 |
| 217874_at    | SUCLG1         | 4,837895809  | 4,665728361  | 0,172167447 |
| 226896_at    | CHCHD1         | 5,044219854  | 4,872052597  | 0,172167257 |
| 1557174_a_at | -              | -0,394749123 | -0,566887459 | 0,172138336 |
| 1558410_s_at | -              | -0,394749123 | -0,566887459 | 0,172138336 |
| 209619_at    | CD74           | -0,394749123 | -0,566887459 | 0,172138336 |
| 212019_at    | RSL1D1         | -0,394749123 | -0,566887459 | 0,172138336 |

|              |                 |              |              |             |  |
|--------------|-----------------|--------------|--------------|-------------|--|
| 223665_at    | ACTRT3          | -0,394749123 | -0,566887459 | 0,172138336 |  |
| 237137_at    | SCARNA2         | -0,394749123 | -0,566887459 | 0,172138336 |  |
| 241985_at    | JMY             | -0,394749123 | -0,566887459 | 0,172138336 |  |
| 36552_at     | C2CD3           | 1,684716943  | 1,512700819  | 0,172016124 |  |
| 201651_s_at  | PACSIN2         | 5,014014911  | 4,842054614  | 0,171960297 |  |
| 1552982_a_at | FGF4            | -2,236765673 | -2,408705138 | 0,171939465 |  |
| 1556297_a_at | -               | -2,236765673 | -2,408705138 | 0,171939465 |  |
| 1556602_at   | -               | -2,236765673 | -2,408705138 | 0,171939465 |  |
| 1561604_at   | -               | -2,236765673 | -2,408705138 | 0,171939465 |  |
| 1563478_at   | KIAA1671        | -2,236765673 | -2,408705138 | 0,171939465 |  |
| 205498_at    | GHR             | -2,236765673 | -2,408705138 | 0,171939465 |  |
| 206134_at    | ADAMDEC1        | -2,236765673 | -2,408705138 | 0,171939465 |  |
| 210942_s_at  | ST3GAL6         | -2,236765673 | -2,408705138 | 0,171939465 |  |
| 215625_at    | LOC644450       | -2,236765673 | -2,408705138 | 0,171939465 |  |
| 215928_at    | -               | -2,236765673 | -2,408705138 | 0,171939465 |  |
| 220141_at    | C11orf63        | -2,236765673 | -2,408705138 | 0,171939465 |  |
| 222449_at    | PMEPA1          | -2,236765673 | -2,408705138 | 0,171939465 |  |
| 236375_at    | -               | -2,236765673 | -2,408705138 | 0,171939465 |  |
| 237822_at    | -               | -2,236765673 | -2,408705138 | 0,171939465 |  |
| 239229_at    | PHEX            | -2,236765673 | -2,408705138 | 0,171939465 |  |
| 241888_at    | -               | -2,236765673 | -2,408705138 | 0,171939465 |  |
| 243518_at    | -               | -2,236765673 | -2,408705138 | 0,171939465 |  |
| 244392_at    | -               | -2,236765673 | -2,408705138 | 0,171939465 |  |
| 242297_at    | RREB1           | 1,04816921   | 0,876248481  | 0,171920729 |  |
| 213013_at    | LOC644172 /// M | 0,20027154   | 0,028364014  | 0,171907525 |  |
| 226022_at    | SASH1           | 0,20027154   | 0,028364014  | 0,171907525 |  |
| 236243_at    | ZCCHC6          | 0,20027154   | 0,028364014  | 0,171907525 |  |
| 207667_s_at  | MAP2K3          | 1,937784532  | 1,765933685  | 0,171850847 |  |
| 223296_at    | SLC25A33        | 4,055697197  | 3,883869861  | 0,171827336 |  |
| 205750_at    | BPHL            | 1,201332287  | 1,029536893  | 0,171795394 |  |
| 219506_at    | C1orf54         | 0,46522187   | 0,293518836  | 0,171703035 |  |
| 222236_s_at  | ASAP3           | 0,46522187   | 0,293518836  | 0,171703035 |  |
| 223123_s_at  | PITHD1          | 0,46522187   | 0,293518836  | 0,171703035 |  |
| 231131_at    | FAM133A         | 0,46522187   | 0,293518836  | 0,171703035 |  |
| 37586_at     | ZNF142          | 0,722031324  | 0,55037832   | 0,171653004 |  |
| 210386_s_at  | MTX1            | 3,296204798  | 3,124599694  | 0,171605104 |  |
| 223397_s_at  | NIP7            | 3,790298086  | 3,618934391  | 0,171363695 |  |
| 212908_at    | DNAJC16         | 2,724770722  | 2,553413592  | 0,17135713  |  |
| 224247_s_at  | MRPS10          | 3,418185797  | 3,246908183  | 0,171277614 |  |
| 227770_at    | COG8            | 1,726031811  | 1,55481039   | 0,17122142  |  |
| 201218_at    | CTBP2           | 4,538199871  | 4,36698147   | 0,1712184   |  |
| 1552587_at   | CNBD1           | -2,866296344 | -3,037500868 | 0,171204524 |  |
| 1554355_a_at | SIAE            | -2,866296344 | -3,037500868 | 0,171204524 |  |
| 1557871_at   | LOC253573       | -2,866296344 | -3,037500868 | 0,171204524 |  |
| 1559124_at   | LOC644135       | -2,866296344 | -3,037500868 | 0,171204524 |  |
| 1560237_at   | -               | -2,866296344 | -3,037500868 | 0,171204524 |  |
| 1560813_at   | -               | -2,866296344 | -3,037500868 | 0,171204524 |  |
| 1568711_a_at | LOC100507498    | -2,866296344 | -3,037500868 | 0,171204524 |  |
| 218804_at    | ANO1            | -2,866296344 | -3,037500868 | 0,171204524 |  |
| 232108_at    | SCRN3           | -2,866296344 | -3,037500868 | 0,171204524 |  |
| 243275_at    | -               | -2,866296344 | -3,037500868 | 0,171204524 |  |
| 200691_s_at  | HSPA9           | 6,233779363  | 6,062592536  | 0,171186827 |  |
| 201979_s_at  | PPP5C           | 3,095191939  | 2,924079008  | 0,171112931 |  |
| 214717_at    | PKI55           | 0,760715727  | 0,589657387  | 0,17105834  |  |
| 233303_at    | -               | 0,760715727  | 0,589657387  | 0,17105834  |  |
| 230259_at    | C10orf125       | 1,549482847  | 1,378453643  | 0,171029204 |  |

|              |                 |              |              |             |  |
|--------------|-----------------|--------------|--------------|-------------|--|
| 205110_s_at  | FGF13           | 1,659347917  | 1,488344553  | 0,171003365 |  |
| 224966_s_at  | DUS3L           | 1,946200473  | 1,775255987  | 0,170944486 |  |
| 33494_at     | ETFDH           | 1,003167985  | 0,832264713  | 0,170903272 |  |
| 223562_at    | PARVG           | -0,112808516 | -0,283667828 | 0,170859311 |  |
| 225314_at    | OCIAD2          | -0,112808516 | -0,283667828 | 0,170859311 |  |
| 227783_at    | CCDC57          | -0,112808516 | -0,283667828 | 0,170859311 |  |
| 212973_at    | RPIA            | 4,636814403  | 4,466010984  | 0,170803418 |  |
| 200605_s_at  | PRKAR1A         | 5,231596898  | 5,060810624  | 0,170786274 |  |
| 235315_at    | TSC22D1         | 1,348276312  | 1,177496821  | 0,170779491 |  |
| 232441_at    | KRR1            | 1,473887017  | 1,303116084  | 0,170770932 |  |
| 212714_at    | LARP4           | 4,211016843  | 4,040263518  | 0,170753325 |  |
| 235423_at    | ORC2            | 1,976645579  | 1,805902329  | 0,17074325  |  |
| 202402_s_at  | CARS            | 2,41290634   | 2,242180416  | 0,170725924 |  |
| 226170_at    | EYA3            | 3,796517367  | 3,625821706  | 0,170695661 |  |
| 1560189_at   | -               | -0,741668563 | -0,912331589 | 0,170663026 |  |
| 1560445_x_at | ARHGEF1         | -0,741668563 | -0,912331589 | 0,170663026 |  |
| 1564319_at   | FAM71E2         | -0,741668563 | -0,912331589 | 0,170663026 |  |
| 204586_at    | BSN             | -0,741668563 | -0,912331589 | 0,170663026 |  |
| 206540_at    | GLB1L           | -0,741668563 | -0,912331589 | 0,170663026 |  |
| 206971_at    | GPR161          | -0,741668563 | -0,912331589 | 0,170663026 |  |
| 229836_s_at  | NUDT4P1         | -0,741668563 | -0,912331589 | 0,170663026 |  |
| 230910_s_at  | LOC100288181    | -0,741668563 | -0,912331589 | 0,170663026 |  |
| 232518_at    | PRIC285         | -0,741668563 | -0,912331589 | 0,170663026 |  |
| 241410_at    | -               | -0,741668563 | -0,912331589 | 0,170663026 |  |
| 242587_at    | SLC9A9          | -0,741668563 | -0,912331589 | 0,170663026 |  |
| 243315_at    | -               | -0,741668563 | -0,912331589 | 0,170663026 |  |
| 226749_at    | MRPS9           | 3,455019843  | 3,284389368  | 0,170630475 |  |
| 204560_at    | FKBP5           | 0,82905153   | 0,658444279  | 0,170607251 |  |
| 211505_s_at  | STAU1           | 3,671816548  | 3,501209806  | 0,170606742 |  |
| 223472_at    | WHSC1           | 0,627515113  | 0,456918297  | 0,170596816 |  |
| 235528_at    | GUCA1B          | 0,627515113  | 0,456918297  | 0,170596816 |  |
| 219366_at    | AVEN            | 2,16388051   | 1,993317152  | 0,170563358 |  |
| 218498_s_at  | ERO1L           | 1,732533761  | 1,562009954  | 0,170523807 |  |
| 201043_s_at  | ANP32A          | 4,703696706  | 4,533260944  | 0,170435762 |  |
| 212110_at    | SLC39A14        | 4,593269972  | 4,422917167  | 0,170352806 |  |
| 217857_s_at  | RBM8A           | 1,767779954  | 1,59747851   | 0,170301444 |  |
| 214700_x_at  | RIF1            | 2,938102794  | 2,767843855  | 0,170258939 |  |
| 225897_at    | MARCKS          | 1,063722698  | 0,893473268  | 0,17024943  |  |
| 226063_at    | VAV2            | 1,063722698  | 0,893473268  | 0,17024943  |  |
| 226890_at    | WDR35           | 1,063722698  | 0,893473268  | 0,17024943  |  |
| 203133_at    | SEC61B          | 6,315968779  | 6,145805576  | 0,170163203 |  |
| 224988_at    | C6orf89         | 1,982112682  | 1,811954245  | 0,170158438 |  |
| 230721_at    | C16orf52        | 1,631786706  | 1,461646549  | 0,170140157 |  |
| 1557207_s_at | LOC283177       | 0,702292136  | 0,532164371  | 0,170127766 |  |
| 201669_s_at  | MARCKS          | 3,276317033  | 3,106248809  | 0,170068224 |  |
| 224756_s_at  | ABHD16A /// LY6 | 3,205636958  | 3,035599287  | 0,17003767  |  |
| 201397_at    | PHGDH           | 0,480753764  | 0,310717132  | 0,170036632 |  |
| 202088_at    | SLC39A6         | 4,445269027  | 4,275233864  | 0,170035163 |  |
| 203094_at    | MAD2L1BP        | 4,333694283  | 4,163710704  | 0,169983579 |  |
| 206488_s_at  | CD36            | 5,506356754  | 5,336402323  | 0,169954431 |  |
| 226336_at    | LOC100288602 /  | 3,634114217  | 3,464222256  | 0,169891961 |  |
| 202631_s_at  | APPBP2          | 1,560488174  | 1,390636111  | 0,169852063 |  |
| 200696_s_at  | GSN             | 2,705069849  | 2,53523821   | 0,169831639 |  |
| 221879_at    | CALML4          | 0,95671774   | 0,786897721  | 0,169820019 |  |
| 227337_at    | ANKRD37         | 1,897847661  | 1,728030156  | 0,169817505 |  |
| 209894_at    | LEPR            | 4,133297997  | 3,963505394  | 0,169792603 |  |

|              |              |              |              |             |  |
|--------------|--------------|--------------|--------------|-------------|--|
| 213735_s_at  | COX5B        | 5,659645186  | 5,489853905  | 0,169791281 |  |
| 206834_at    | HBD          | 6,636346263  | 6,46657202   | 0,169774243 |  |
| 202871_at    | TRAF4        | 1,706348269  | 1,536652708  | 0,169695561 |  |
| 209339_at    | SIAH2        | 2,26825514   | 2,098562556  | 0,169692584 |  |
| 205031_at    | EFNB3        | 2,292660284  | 2,123108223  | 0,169552061 |  |
| 230477_at    | LOC100130522 | 0,123193849  | -0,046302147 | 0,169495996 |  |
| 236122_at    | -            | 0,123193849  | -0,046302147 | 0,169495996 |  |
| 207121_s_at  | MAPK6        | 5,48461416   | 5,315121782  | 0,169492378 |  |
| 222440_s_at  | THRAP3       | 3,136227209  | 2,966746113  | 0,169481096 |  |
| 201891_s_at  | B2M          | 7,339534953  | 7,170099044  | 0,169435909 |  |
| 202748_at    | GBP2         | 1,360921491  | 1,191491281  | 0,16943021  |  |
| 206707_x_at  | FAM65B       | 1,638726528  | 1,469325098  | 0,16940143  |  |
| 208114_s_at  | ISG20L2      | 2,466546243  | 2,297144887  | 0,169401357 |  |
| 202026_at    | SDHD         | 4,993521137  | 4,82420097   | 0,169320167 |  |
| 225965_at    | DDHD1        | 0,841135803  | 0,67181667   | 0,169319133 |  |
| 1566548_at   | -            | -0,366776884 | -0,536087151 | 0,169310267 |  |
| 205334_at    | S100A1       | -0,366776884 | -0,536087151 | 0,169310267 |  |
| 221402_at    | OR1F1        | -0,366776884 | -0,536087151 | 0,169310267 |  |
| 233931_at    | -            | -0,366776884 | -0,536087151 | 0,169310267 |  |
| 233991_at    | -            | -0,366776884 | -0,536087151 | 0,169310267 |  |
| 240002_at    | LOC389634    | -0,366776884 | -0,536087151 | 0,169310267 |  |
| 227567_at    | LOC100499466 | 1,224581536  | 1,055274826  | 0,16930671  |  |
| 202087_s_at  | CTSL1        | 4,346467354  | 4,177252958  | 0,169214396 |  |
| 223716_s_at  | ZRANB2       | 4,998250432  | 4,829058189  | 0,169192242 |  |
| 221652_s_at  | ASUN         | 4,026230348  | 3,857048799  | 0,169181549 |  |
| 226767_s_at  | FAHD1        | 1,406361373  | 1,23718272   | 0,169178653 |  |
| 229307_at    | ANKRD28      | 1,81142822   | 1,642321262  | 0,169106958 |  |
| 213387_at    | ATAD2B       | 2,81177561   | 2,64270545   | 0,16907016  |  |
| 203313_s_at  | TGIF1        | 3,50998543   | 3,340940512  | 0,169044918 |  |
| 239960_x_at  | LYRM7        | 1,274448124  | 1,105412836  | 0,169035288 |  |
| 201999_s_at  | DYNLT1       | 5,841890383  | 5,672859131  | 0,169031251 |  |
| 1555730_a_at | CFL1         | 5,434648023  | 5,26568197   | 0,168966053 |  |
| 203646_at    | FDX1         | 2,713311265  | 2,544354523  | 0,168956742 |  |
| 214387_x_at  | SFTPC        | -0,221656139 | -0,39061235  | 0,168956212 |  |
| 220827_at    | -            | -0,221656139 | -0,39061235  | 0,168956212 |  |
| 231052_at    | GLOD5        | -0,221656139 | -0,39061235  | 0,168956212 |  |
| 233315_at    | -            | -0,221656139 | -0,39061235  | 0,168956212 |  |
| 237681_at    | -            | -0,221656139 | -0,39061235  | 0,168956212 |  |
| 243404_at    | -            | -0,221656139 | -0,39061235  | 0,168956212 |  |
| 218398_at    | MRPS30       | 4,387215694  | 4,21827299   | 0,168942704 |  |
| 220073_s_at  | PLEKHG6      | 0,228146222  | 0,059218869  | 0,168927353 |  |
| 220418_at    | UBASH3A      | 0,228146222  | 0,059218869  | 0,168927353 |  |
| 226920_at    | CSNK1A1      | 0,228146222  | 0,059218869  | 0,168927353 |  |
| 227528_s_at  | MLL2         | 0,228146222  | 0,059218869  | 0,168927353 |  |
| 231697_s_at  | -            | 0,228146222  | 0,059218869  | 0,168927353 |  |
| 222980_at    | RAB10        | 5,55279188   | 5,38389617   | 0,16889571  |  |
| 212180_at    | CRKL         | 4,222610527  | 4,053733117  | 0,16887741  |  |
| 226098_at    | IFT80        | 2,077135162  | 1,908311039  | 0,168824122 |  |
| 229644_at    | PREP         | 1,748661581  | 1,579853228  | 0,168808353 |  |
| 217716_s_at  | SEC61A1      | 4,253455927  | 4,084681583  | 0,168774344 |  |
| 217202_s_at  | GLUL         | 3,571118904  | 3,402394519  | 0,168724385 |  |
| 203205_at    | KDM4A        | 1,493160564  | 1,324440845  | 0,168719719 |  |
| 225953_at    | RPRD1A       | 3,493810203  | 3,325159096  | 0,168651107 |  |
| 203242_s_at  | PDLIM5       | 2,433006244  | 2,264418116  | 0,168588128 |  |
| 1554008_at   | OSMR         | -0,986356909 | -1,154897679 | 0,16854077  |  |
| 1563014_at   | RPS15        | -0,986356909 | -1,154897679 | 0,16854077  |  |

|              |                  |              |              |             |  |
|--------------|------------------|--------------|--------------|-------------|--|
| 205605_at    | HOXD9            | -0,986356909 | -1,154897679 | 0,16854077  |  |
| 208488_s_at  | CR1              | -0,986356909 | -1,154897679 | 0,16854077  |  |
| 210152_at    | LILRB4           | -0,986356909 | -1,154897679 | 0,16854077  |  |
| 212839_s_at  | TROVE2           | -0,986356909 | -1,154897679 | 0,16854077  |  |
| 220852_at    | PRO1768          | -0,986356909 | -1,154897679 | 0,16854077  |  |
| 228022_at    | CCDC18           | -0,986356909 | -1,154897679 | 0,16854077  |  |
| 230664_at    | H2BFXP           | -0,986356909 | -1,154897679 | 0,16854077  |  |
| 230717_at    | LCN12            | -0,986356909 | -1,154897679 | 0,16854077  |  |
| 232666_at    | OAS3             | -0,986356909 | -1,154897679 | 0,16854077  |  |
| 237371_at    | -                | -0,986356909 | -1,154897679 | 0,16854077  |  |
| 238349_at    | UBN2             | -0,986356909 | -1,154897679 | 0,16854077  |  |
| 238374_at    | H1FNT            | -0,986356909 | -1,154897679 | 0,16854077  |  |
| 243536_x_at  | ARHGAP27         | -0,986356909 | -1,154897679 | 0,16854077  |  |
| 244413_at    | CLECL1           | -0,986356909 | -1,154897679 | 0,16854077  |  |
| 203343_at    | UGDH             | 3,207971844  | 3,039473081  | 0,168498763 |  |
| 202520_s_at  | MLH1             | 4,302897163  | 4,13442882   | 0,168468343 |  |
| 202918_s_at  | HSPE1-MOB4 ///   | 4,647605722  | 4,479143747  | 0,168461976 |  |
| 1557342_a_at | -                | -0,089689931 | -0,258114234 | 0,168424303 |  |
| 204789_at    | FMNL1            | -0,089689931 | -0,258114234 | 0,168424303 |  |
| 209573_s_at  | C18orf1          | -0,089689931 | -0,258114234 | 0,168424303 |  |
| 231774_at    | KCNIP3           | -0,089689931 | -0,258114234 | 0,168424303 |  |
| 236898_at    | -                | -0,089689931 | -0,258114234 | 0,168424303 |  |
| 227012_at    | SLC25A40         | 2,525769574  | 2,357351836  | 0,168417738 |  |
| 230947_at    | 41153            | 0,648296226  | 0,479907041  | 0,168389185 |  |
| 221702_s_at  | TM2D3            | 4,239257588  | 4,070868415  | 0,168389172 |  |
| 216650_at    | -                | 1,233777334  | 1,065442793  | 0,168334541 |  |
| 209941_at    | RIPK1            | 1,414471577  | 1,246149888  | 0,168321689 |  |
| 200912_s_at  | EIF4A2 /// MIR12 | 7,019980367  | 6,851696186  | 0,168284181 |  |
| 217437_s_at  | TACC1            | 2,327437554  | 2,159161028  | 0,168276526 |  |
| 1553415_at   | SLC17A8          | -2,930741289 | -3,098858316 | 0,168117027 |  |
| 1555355_a_at | ETS1             | -2,930741289 | -3,098858316 | 0,168117027 |  |
| 1558846_at   | PNLIPRP3         | -2,930741289 | -3,098858316 | 0,168117027 |  |
| 1559045_at   | LOC100128288     | -2,930741289 | -3,098858316 | 0,168117027 |  |
| 1560288_at   | -                | -2,930741289 | -3,098858316 | 0,168117027 |  |
| 1562400_at   | LOC283112        | -2,930741289 | -3,098858316 | 0,168117027 |  |
| 1562644_at   | MTHFD2L          | -2,930741289 | -3,098858316 | 0,168117027 |  |
| 1567247_at   | OR5H1            | -2,930741289 | -3,098858316 | 0,168117027 |  |
| 1569756_at   | -                | -2,930741289 | -3,098858316 | 0,168117027 |  |
| 215228_at    | NHLH2            | -2,930741289 | -3,098858316 | 0,168117027 |  |
| 216722_at    | VENTXP1          | -2,930741289 | -3,098858316 | 0,168117027 |  |
| 224231_at    | PRO0471          | -2,930741289 | -3,098858316 | 0,168117027 |  |
| 231856_at    | KIAA1244         | -2,930741289 | -3,098858316 | 0,168117027 |  |
| 241861_at    | SYCP3            | -2,930741289 | -3,098858316 | 0,168117027 |  |
| 243958_at    | -                | -2,930741289 | -3,098858316 | 0,168117027 |  |
| 244612_at    | -                | -2,930741289 | -3,098858316 | 0,168117027 |  |
| 213320_at    | PRMT3            | 2,943717636  | 2,775606361  | 0,168111276 |  |
| 200838_at    | CTSB             | 3,659926886  | 3,491815843  | 0,168111043 |  |
| 218427_at    | SDCCAG3          | 2,577249059  | 2,409170778  | 0,168078281 |  |
| 214681_at    | GK               | 0,97328325   | 0,805216064  | 0,168067186 |  |
| 205305_at    | FGL1             | 2,416948786  | 2,248887791  | 0,168060995 |  |
| 1563405_at   | ATP4B            | 0,417596971  | 0,249604176  | 0,167992795 |  |
| 226547_at    | KAT6A            | 3,030704581  | 2,862725455  | 0,167979126 |  |
| 203384_s_at  | GOLGA1           | 0,03125738   | -0,136643983 | 0,167901363 |  |
| 220573_at    | KLK14            | 0,03125738   | -0,136643983 | 0,167901363 |  |
| 233230_s_at  | SLAIN2           | 0,03125738   | -0,136643983 | 0,167901363 |  |
| 238207_at    | C3orf78          | 0,03125738   | -0,136643983 | 0,167901363 |  |

|              |                 |              |              |             |  |
|--------------|-----------------|--------------|--------------|-------------|--|
| 206205_at    | MPHOSPH9        | 1,917954284  | 1,750261389  | 0,167692895 |  |
| 204776_at    | THBS4           | 0,503742507  | 0,336136178  | 0,167606329 |  |
| 206173_x_at  | GABPB1          | 2,333865983  | 2,166264721  | 0,167601261 |  |
| 52837_at     | KIAA1644        | -2,113928714 | -2,281445174 | 0,167516459 |  |
| 1555107_a_at | UVSSA           | -0,512251684 | -0,679763839 | 0,167512155 |  |
| 1559474_at   | SPEG            | -0,512251684 | -0,679763839 | 0,167512155 |  |
| 207684_at    | TBX6            | -0,512251684 | -0,679763839 | 0,167512155 |  |
| 208458_at    | SCNN1D          | -0,512251684 | -0,679763839 | 0,167512155 |  |
| 210197_at    | ITPK1           | -0,512251684 | -0,679763839 | 0,167512155 |  |
| 214968_at    | DDX51           | -0,512251684 | -0,679763839 | 0,167512155 |  |
| 223641_at    | -               | -0,512251684 | -0,679763839 | 0,167512155 |  |
| 237267_at    | LOC100506675    | -0,512251684 | -0,679763839 | 0,167512155 |  |
| 239216_at    | TEKT1           | -0,512251684 | -0,679763839 | 0,167512155 |  |
| 239870_at    | SPATS1 /// TMEM | -0,512251684 | -0,679763839 | 0,167512155 |  |
| 1568796_at   | CCDC157         | 0,859074518  | 0,691645685  | 0,167428833 |  |
| 225521_at    | ANAPC7          | 0,859074518  | 0,691645685  | 0,167428833 |  |
| 236817_at    | ADAT2           | 1,143956113  | 0,976641161  | 0,167314952 |  |
| 212635_at    | TNPO1           | 3,899061119  | 3,731768909  | 0,167292211 |  |
| 1554065_at   | FAM125B         | 0,246434561  | 0,079428135  | 0,167006426 |  |
| 1568728_s_at | RNF207          | 0,246434561  | 0,079428135  | 0,167006426 |  |
| 214140_at    | SLC25A16        | 0,246434561  | 0,079428135  | 0,167006426 |  |
| 219666_at    | MS4A6A          | 0,246434561  | 0,079428135  | 0,167006426 |  |
| 231583_at    | KRT74           | 0,246434561  | 0,079428135  | 0,167006426 |  |
| 238470_at    | SYS1            | 0,246434561  | 0,079428135  | 0,167006426 |  |
| 227476_at    | LPGAT1          | 0,661985843  | 0,495031851  | 0,166953992 |  |
| 236695_at    | STK4-AS1        | 0,661985843  | 0,495031851  | 0,166953992 |  |
| 239311_at    | -               | 0,661985843  | 0,495031851  | 0,166953992 |  |
| 213185_at    | KIAA0556        | 0,984222186  | 0,817300337  | 0,166921849 |  |
| 228517_at    | MEAF6           | 0,984222186  | 0,817300337  | 0,166921849 |  |
| 236442_at    | DPF3            | 0,984222186  | 0,817300337  | 0,166921849 |  |
| 242439_s_at  | ASXL1           | 0,984222186  | 0,817300337  | 0,166921849 |  |
| 217970_s_at  | CNOT6           | 3,569303935  | 3,402394519  | 0,166909416 |  |
| 200662_s_at  | TOMM20          | 5,715894277  | 5,549023389  | 0,166870888 |  |
| 1556176_at   | TAF8            | 0,735041319  | 0,568365095  | 0,166676224 |  |
| 1570362_at   | -               | 0,735041319  | 0,568365095  | 0,166676224 |  |
| 202763_at    | CASP3           | 4,244953702  | 4,078419261  | 0,166534441 |  |
| 209707_at    | PIGK            | 3,202127528  | 3,035599287  | 0,166528241 |  |
| 201171_at    | LOC100652765    | 1,666156729  | 1,499637023  | 0,166519706 |  |
| 224447_s_at  | MIEN1           | 3,072307152  | 2,905803877  | 0,166503275 |  |
| 226660_at    | RPS6KB1         | 3,936854923  | 3,770352811  | 0,166502112 |  |
| 226601_at    | SLC30A7         | 2,151803104  | 1,98530622   | 0,166496884 |  |
| 209645_s_at  | ALDH1B1         | 1,390002893  | 1,223626587  | 0,166376306 |  |
| 226742_at    | SAR1B           | 3,593615441  | 3,427247355  | 0,166368086 |  |
| 226443_at    | FAM122A         | 2,277177578  | 2,110887591  | 0,166289988 |  |
| 201636_at    | FXR1            | 3,312571045  | 3,146317015  | 0,16625403  |  |
| 1558066_s_at | TBC1D16         | 0,87091093   | 0,704715219  | 0,166195711 |  |
| 228190_at    | ATG4C           | 2,102456302  | 1,936283387  | 0,166172915 |  |
| 1552993_at   | DYDC1           | -2,972500237 | -3,138626879 | 0,166126642 |  |
| 1555341_at   | UNC5C           | -2,972500237 | -3,138626879 | 0,166126642 |  |
| 1560251_at   | LOC645485       | -2,972500237 | -3,138626879 | 0,166126642 |  |
| 1561210_at   | -               | -2,972500237 | -3,138626879 | 0,166126642 |  |
| 1563001_at   | -               | -2,972500237 | -3,138626879 | 0,166126642 |  |
| 1563133_at   | -               | -2,972500237 | -3,138626879 | 0,166126642 |  |
| 1564777_at   | HYALP1          | -2,972500237 | -3,138626879 | 0,166126642 |  |
| 1566673_at   | -               | -2,972500237 | -3,138626879 | 0,166126642 |  |
| 206439_at    | EPYC            | -2,972500237 | -3,138626879 | 0,166126642 |  |



|              |                 |              |              |             |  |
|--------------|-----------------|--------------|--------------|-------------|--|
| 206456_at    | GABRA5          | -2,972500237 | -3,138626879 | 0,166126642 |  |
| 213006_at    | CEBPD           | -2,972500237 | -3,138626879 | 0,166126642 |  |
| 232638_at    | COL20A1         | -2,972500237 | -3,138626879 | 0,166126642 |  |
| 232872_at    | -               | -2,972500237 | -3,138626879 | 0,166126642 |  |
| 237160_at    | CCDC83          | -2,972500237 | -3,138626879 | 0,166126642 |  |
| 237837_at    | -               | -2,972500237 | -3,138626879 | 0,166126642 |  |
| 239185_at    | ABCA9           | -2,972500237 | -3,138626879 | 0,166126642 |  |
| 242057_at    | -               | -2,972500237 | -3,138626879 | 0,166126642 |  |
| 242170_at    | -               | -2,972500237 | -3,138626879 | 0,166126642 |  |
| 243901_at    | ALDOB           | -2,972500237 | -3,138626879 | 0,166126642 |  |
| 217185_s_at  | ZNF259 /// ZNF2 | 2,87191078   | 2,705818724  | 0,166092057 |  |
| 223251_s_at  | ANKRD10         | 2,791679321  | 2,625627364  | 0,166051958 |  |
| 33148_at     | ZFR             | 1,194283819  | 1,028237864  | 0,166045955 |  |
| 242292_at    | FAM226B         | 0,518867317  | 0,352836757  | 0,16603056  |  |
| 1557219_at   | LOC100506827    | -0,946847173 | -1,112851844 | 0,166004671 |  |
| 208014_x_at  | -               | -0,946847173 | -1,112851844 | 0,166004671 |  |
| 216663_s_at  | ZMYND10         | -0,946847173 | -1,112851844 | 0,166004671 |  |
| 221333_at    | FOXP3           | -0,946847173 | -1,112851844 | 0,166004671 |  |
| 229731_at    | FOXS1           | -0,946847173 | -1,112851844 | 0,166004671 |  |
| 230342_at    | FOXK1           | -0,946847173 | -1,112851844 | 0,166004671 |  |
| 235140_at    | SHROOM1         | -0,946847173 | -1,112851844 | 0,166004671 |  |
| 244122_at    | MGST3           | -0,946847173 | -1,112851844 | 0,166004671 |  |
| 203630_s_at  | COG5            | 2,808702036  | 2,64270545   | 0,165996586 |  |
| 225993_at    | EARS2           | 0,934330293  | 0,768343791  | 0,165986502 |  |
| 203403_s_at  | RNF6            | 4,724639777  | 4,558677353  | 0,165962424 |  |
| 215510_at    | ETV2            | 1,841816345  | 1,675891488  | 0,165924857 |  |
| 200694_s_at  | DDX24           | 5,341750837  | 5,175853482  | 0,165897355 |  |
| 226157_at    | TFDP2           | 2,281618189  | 2,115788273  | 0,165829917 |  |
| 210947_s_at  | MSH3            | 1,874520207  | 1,708698295  | 0,165821912 |  |
| 205522_at    | HOXD4           | 1,672933557  | 1,507116528  | 0,165817029 |  |
| 205051_s_at  | KIT             | 6,032283861  | 5,866470968  | 0,165812893 |  |
| 201964_at    | SETX            | 2,691784869  | 2,526063925  | 0,165720944 |  |
| 224800_at    | WDFY1           | 3,418185797  | 3,252481567  | 0,16570423  |  |
| 226642_s_at  | NUDCD2          | 4,178645282  | 4,012941072  | 0,165704211 |  |
| 201652_at    | COPS5           | 5,703122923  | 5,537427697  | 0,165695227 |  |
| 223474_at    | IRF2BPL         | 6,054672518  | 5,889009948  | 0,16566257  |  |
| 201681_s_at  | DLG5            | 1,523472489  | 1,3579181    | 0,165554389 |  |
| 225049_at    | BLOC1S2         | 5,311127054  | 5,145621945  | 0,165505108 |  |
| 228963_at    | -               | 1,780386218  | 1,614891062  | 0,165495157 |  |
| 40284_at     | FOXA2           | -2,570400074 | -2,735862426 | 0,165462352 |  |
| 223599_at    | TRIM6           | 1,940595304  | 1,775255987  | 0,165339317 |  |
| 207740_s_at  | NUP62           | 2,956271699  | 2,791007185  | 0,165264514 |  |
| 224566_at    | LOC100653017 /  | 2,799441827  | 2,634191677  | 0,16525015  |  |
| 235125_x_at  | FAM73A          | 1,000476627  | 0,835239052  | 0,165237575 |  |
| 221434_s_at  | SLIRP           | 6,820231911  | 6,655003304  | 0,165228606 |  |
| 1555483_x_at | FBLIM1          | -0,325749314 | -0,490927335 | 0,165178021 |  |
| 1559240_at   | LOC100507053    | -0,325749314 | -0,490927335 | 0,165178021 |  |
| 204882_at    | ARHGAP25        | -0,325749314 | -0,490927335 | 0,165178021 |  |
| 211094_s_at  | NF1             | -0,325749314 | -0,490927335 | 0,165178021 |  |
| 221376_at    | FGF17           | -0,325749314 | -0,490927335 | 0,165178021 |  |
| 222125_s_at  | P4HTM           | -0,325749314 | -0,490927335 | 0,165178021 |  |
| 222784_at    | SMOC1           | -0,325749314 | -0,490927335 | 0,165178021 |  |
| 231542_at    | SPAG5-AS1       | -0,325749314 | -0,490927335 | 0,165178021 |  |
| 232870_at    | HDAC10          | -0,325749314 | -0,490927335 | 0,165178021 |  |
| 236103_at    | -               | -0,325749314 | -0,490927335 | 0,165178021 |  |
| 239677_at    | -               | -0,325749314 | -0,490927335 | 0,165178021 |  |

|              |                |              |              |             |  |
|--------------|----------------|--------------|--------------|-------------|--|
| 240278_at    | RASSF1         | -0,325749314 | -0,490927335 | 0,165178021 |  |
| 202380_s_at  | NKTR           | 2,001086023  | 1,835911187  | 0,165174836 |  |
| 218205_s_at  | MKNK2          | 4,880967039  | 4,71581024   | 0,165156799 |  |
| 201304_at    | NDUFA5         | 5,624243949  | 5,459092535  | 0,165151414 |  |
| 223107_s_at  | ZCCHC17        | 3,547344317  | 3,382199319  | 0,165144998 |  |
| 212405_s_at  | METTL13        | 3,784051878  | 3,618934391  | 0,165117487 |  |
| 205042_at    | GNE            | 2,912562019  | 2,747463672  | 0,165098348 |  |
| 212685_s_at  | TBL2           | 3,508091848  | 3,343031718  | 0,165060131 |  |
| 225447_at    | GPD2           | 4,038745395  | 3,873779903  | 0,164965492 |  |
| 205769_at    | SLC27A2        | 1,883312263  | 1,718396606  | 0,164915657 |  |
| 223637_s_at  | FAM160A2       | 1,883312263  | 1,718396606  | 0,164915657 |  |
| 209274_s_at  | ISCA1          | 4,160677048  | 3,995764148  | 0,1649129   |  |
| 1562012_at   | LOC100506730   | -0,055687482 | -0,220592223 | 0,164904741 |  |
| 1569898_a_at | LOC100132707   | -0,055687482 | -0,220592223 | 0,164904741 |  |
| 223371_s_at  | DNAJC4         | -0,055687482 | -0,220592223 | 0,164904741 |  |
| 236073_at    | EPHA10         | -0,055687482 | -0,220592223 | 0,164904741 |  |
| 242272_at    | ZNF785         | -0,055687482 | -0,220592223 | 0,164904741 |  |
| 225351_at    | FAM45A         | 2,218170265  | 2,053299695  | 0,16487057  |  |
| 203102_s_at  | MGAT2          | 5,452973635  | 5,288105861  | 0,164867774 |  |
| 203875_at    | SMARCA1        | 2,243430036  | 2,078620836  | 0,164809201 |  |
| 225158_at    | GFM1           | 3,540875956  | 3,376085218  | 0,164790738 |  |
| 231396_s_at  | FAM126A        | 1,683039483  | 1,518263577  | 0,164775905 |  |
| 209255_at    | KLHDC10        | 1,946200473  | 1,781437557  | 0,164762916 |  |
| 221436_s_at  | CDCA3          | 3,155710652  | 2,990953566  | 0,164757086 |  |
| 201123_s_at  | EIF5A          | 7,300614252  | 7,135905898  | 0,164708354 |  |
| 201031_s_at  | HNRNPH1        | 6,479154262  | 6,314485986  | 0,164668276 |  |
| 202883_s_at  | PPP2R1B        | 3,780134221  | 3,615478364  | 0,164655857 |  |
| 215826_x_at  | ZNF835         | 1,269985355  | 1,105412836  | 0,164572519 |  |
| 1555185_x_at | TERF2          | 0,822971223  | 0,658444279  | 0,164526944 |  |
| 227605_at    | AIMP1          | 0,822971223  | 0,658444279  | 0,164526944 |  |
| 204812_at    | ZW10           | 3,270743649  | 3,106248809  | 0,16449484  |  |
| 221056_x_at  | EPS15L1        | 1,823660386  | 1,659204017  | 0,164456369 |  |
| 210495_x_at  | FN1            | 2,197169074  | 2,032717854  | 0,164451221 |  |
| 223540_at    | PVRL4          | 0,171847695  | 0,007421914  | 0,164425782 |  |
| 234664_at    | LOC100132062 / | 0,171847695  | 0,007421914  | 0,164425782 |  |
| 225704_at    | FBRSL1         | 1,534677255  | 1,370274469  | 0,164402786 |  |
| 227205_at    | TAF1           | 3,037284587  | 2,87289275   | 0,164391837 |  |
| 1554192_s_at | TRMT44         | 0,888485433  | 0,724100169  | 0,164385264 |  |
| 210188_at    | GABPA          | 0,888485433  | 0,724100169  | 0,164385264 |  |
| 208094_s_at  | CCDC130        | 3,052955227  | 2,888726553  | 0,164228673 |  |
| 206567_s_at  | PHF20          | 2,094906514  | 1,930732138  | 0,164174376 |  |
| 1556211_a_at | -              | -3,013665402 | -3,177802286 | 0,164136884 |  |
| 1561613_at   | -              | -3,013665402 | -3,177802286 | 0,164136884 |  |
| 1564392_at   | LINC00320      | -3,013665402 | -3,177802286 | 0,164136884 |  |
| 1564469_at   | LMOD3          | -3,013665402 | -3,177802286 | 0,164136884 |  |
| 1565228_s_at | ALB            | -3,013665402 | -3,177802286 | 0,164136884 |  |
| 1566716_at   | -              | -3,013665402 | -3,177802286 | 0,164136884 |  |
| 1569591_at   | F11            | -3,013665402 | -3,177802286 | 0,164136884 |  |
| 205989_s_at  | MOG            | -3,013665402 | -3,177802286 | 0,164136884 |  |
| 217524_x_at  | -              | -3,013665402 | -3,177802286 | 0,164136884 |  |
| 220345_at    | LRRTM4         | -3,013665402 | -3,177802286 | 0,164136884 |  |
| 231726_at    | PCDHB14        | -3,013665402 | -3,177802286 | 0,164136884 |  |
| 234433_at    | -              | -3,013665402 | -3,177802286 | 0,164136884 |  |
| 234904_x_at  | ELAVL4         | -3,013665402 | -3,177802286 | 0,164136884 |  |
| 237233_at    | -              | -3,013665402 | -3,177802286 | 0,164136884 |  |
| 237282_s_at  | AKAP14         | -3,013665402 | -3,177802286 | 0,164136884 |  |

|              |                 |              |              |             |
|--------------|-----------------|--------------|--------------|-------------|
| 240921_at    | -               | -3,013665402 | -3,177802286 | 0,164136884 |
| 204701_s_at  | STOML1          | 1,011212064  | 0,847075464  | 0,1641366   |
| 223145_s_at  | AKIRIN2         | 3,92199823   | 3,757867094  | 0,164131136 |
| 219704_at    | YBX2            | 2,122398022  | 1,958277216  | 0,164120806 |
| 213338_at    | TMEM158         | 1,689737652  | 1,525647381  | 0,164090271 |
| 205024_s_at  | RAD51           | 3,345817457  | 3,181801492  | 0,164015966 |
| 222204_s_at  | RRN3            | 4,6079313    | 4,44401622   | 0,16391508  |
| 208725_at    | EIF2S2          | 1,795990708  | 1,632095957  | 0,163894751 |
| 212189_s_at  | COG4            | 1,795990708  | 1,632095957  | 0,163894751 |
| 217097_s_at  | PHTF2           | 0,457392764  | 0,293518836  | 0,163873929 |
| 223449_at    | SEMA6A          | 0,457392764  | 0,293518836  | 0,163873929 |
| 239034_at    | CXorf24         | 0,457392764  | 0,293518836  | 0,163873929 |
| 202682_s_at  | USP4            | 4,240398611  | 4,076535251  | 0,16386336  |
| 204425_at    | ARHGAP4         | 1,177702228  | 1,013870809  | 0,163831419 |
| 34031_i_at   | KRIT1           | 2,675004741  | 2,511262629  | 0,163742112 |
| 211358_s_at  | CIZ1            | 0,541261317  | 0,377530647  | 0,16373067  |
| 236698_at    | -               | 0,541261317  | 0,377530647  | 0,16373067  |
| 237411_at    | ADAMTS6         | 0,541261317  | 0,377530647  | 0,16373067  |
| 212398_at    | RDX             | 2,693452197  | 2,529740643  | 0,163711555 |
| 200047_s_at  | YY1             | 6,626015835  | 6,462369855  | 0,16364598  |
| 219128_at    | C2orf42         | 1,542099044  | 1,378453643  | 0,1636454   |
| 227569_at    | LNx2            | 2,926807124  | 2,763166224  | 0,1636409   |
| 204444_at    | KIF11           | 3,857278636  | 3,693764321  | 0,163514315 |
| 227078_at    | TMEM110         | 0,695652136  | 0,532164371  | 0,163487766 |
| 231777_at    | CSNK2B /// LY6G | 0,695652136  | 0,532164371  | 0,163487766 |
| 235526_at    | SOX6            | 0,695652136  | 0,532164371  | 0,163487766 |
| 205395_s_at  | MRE11A          | 2,621710292  | 2,458228496  | 0,163481796 |
| 227656_at    | C6orf70         | 1,865674241  | 1,702196344  | 0,163477897 |
| 240928_at    | FCF1            | 1,865674241  | 1,702196344  | 0,163477897 |
| 221877_at    | IRGQ            | 2,783874823  | 2,620464265  | 0,163410558 |
| 1554456_a_at | LINS            | 0,767063567  | 0,603679647  | 0,16338392  |
| 1555469_a_at | CLASP2          | 0,767063567  | 0,603679647  | 0,16338392  |
| 225876_at    | NIPAL3          | 0,767063567  | 0,603679647  | 0,16338392  |
| 1552579_a_at | ADAM21          | -0,655928373 | -0,819238336 | 0,163309963 |
| 1554488_at   | CEP70           | -0,655928373 | -0,819238336 | 0,163309963 |
| 1557283_a_at | ZNF519          | -0,655928373 | -0,819238336 | 0,163309963 |
| 217120_s_at  | MED14           | -0,655928373 | -0,819238336 | 0,163309963 |
| 220214_at    | ZNF215          | -0,655928373 | -0,819238336 | 0,163309963 |
| 232758_s_at  | -               | -0,655928373 | -0,819238336 | 0,163309963 |
| 237464_at    | LOC100506060 /  | -0,655928373 | -0,819238336 | 0,163309963 |
| 241925_x_at  | -               | -0,655928373 | -0,819238336 | 0,163309963 |
| 242382_at    | LOC100506207    | -0,655928373 | -0,819238336 | 0,163309963 |
| 209350_s_at  | GPS2            | 2,352981171  | 2,189694216  | 0,163286955 |
| 202369_s_at  | TRAM2           | 4,447740857  | 4,284512471  | 0,163228385 |
| 1554513_s_at | CEP89           | 0,900083947  | 0,73688026   | 0,163203687 |
| 224460_s_at  | L2HGDH          | 0,900083947  | 0,73688026   | 0,163203687 |
| 203867_s_at  | NLE1            | 1,62481334   | 1,461646549  | 0,163166791 |
| 200600_at    | MSN             | 6,775968267  | 6,612835819  | 0,163132448 |
| 227171_at    | CCT4            | 1,735773781  | 1,572742379  | 0,163031402 |
| 220329_s_at  | RMND1           | 2,422991296  | 2,259997914  | 0,162993383 |
| 207494_s_at  | ZNF76           | 1,46610492   | 1,303116084  | 0,162988836 |
| 201232_s_at  | PSMD13          | 5,100441809  | 4,93752389   | 0,162917919 |
| 201186_at    | LRPAP1          | 3,03990821   | 2,877228323  | 0,162679887 |
| 1559060_a_at | FNIP1           | -0,033456564 | -0,19610998  | 0,162653416 |
| 1560841_at   | LOC389247       | -0,033456564 | -0,19610998  | 0,162653416 |
| 208176_at    | DUX1            | -0,033456564 | -0,19610998  | 0,162653416 |

|              |                 |              |              |             |
|--------------|-----------------|--------------|--------------|-------------|
| 239418_x_at  | -               | -0,033456564 | -0,19610998  | 0,162653416 |
| 239532_at    | -               | -0,033456564 | -0,19610998  | 0,162653416 |
| 205662_at    | B9D1            | 1,163336153  | 1,000684521  | 0,162651632 |
| 1568609_s_at | FAM91A2 /// FLJ | 2,35929703   | 2,196649505  | 0,162647525 |
| 230188_at    | NIPAL4          | 0,083054335  | -0,079522948 | 0,162577283 |
| 234367_x_at  | TMPRSS6         | 0,083054335  | -0,079522948 | 0,162577283 |
| 1561666_a_at | KIAA1908        | -0,299034815 | -0,461594427 | 0,162559612 |
| 1566504_at   | -               | -0,299034815 | -0,461594427 | 0,162559612 |
| 1569961_at   | -               | -0,299034815 | -0,461594427 | 0,162559612 |
| 210852_s_at  | AASS            | -0,299034815 | -0,461594427 | 0,162559612 |
| 234580_at    | TMEM106A        | -0,299034815 | -0,461594427 | 0,162559612 |
| 230466_s_at  | RASSF3          | 1,027166904  | 0,864649967  | 0,162516937 |
| 226294_x_at  | FAM91A1         | 3,990735001  | 3,828227545  | 0,162507456 |
| 202236_s_at  | SLC16A1         | 5,386243429  | 5,223738367  | 0,162505062 |
| 204237_at    | GULP1           | 1,593009234  | 1,43051703   | 0,162492204 |
| 218915_at    | NF2             | 3,111496958  | 2,949006836  | 0,162490122 |
| 228531_at    | SAMD9           | 3,290707863  | 3,128242026  | 0,162465837 |
| 226474_at    | NLRC5           | 1,631786706  | 1,469325098  | 0,162461608 |
| 203223_at    | RABEP1          | 1,139070151  | 0,976641161  | 0,16242899  |
| 236092_at    | -               | 1,139070151  | 0,976641161  | 0,16242899  |
| 232227_at    | LOC100505976    | 0,291166226  | 0,128747141  | 0,162419085 |
| 1557690_x_at | -               | 0,384950573  | 0,222599095  | 0,162351479 |
| 230219_at    | NDE1            | 0,384950573  | 0,222599095  | 0,162351479 |
| 225472_at    | GPANK1          | 3,819603766  | 3,6572547    | 0,162349066 |
| 201534_s_at  | UBL3            | 2,535098095  | 2,372786857  | 0,162311238 |
| 233992_x_at  | ZNF445          | 1,339784194  | 1,177496821  | 0,162287374 |
| 236551_at    | ZNF311          | 1,339784194  | 1,177496821  | 0,162287374 |
| 221606_s_at  | HMGN5           | 3,268508253  | 3,106248809  | 0,162259444 |
| 210621_s_at  | RASA1           | 3,420201053  | 3,258033502  | 0,162167551 |
| 223931_s_at  | CHFR            | 2,830080806  | 2,667949403  | 0,162131403 |
| 205182_s_at  | ZNF324          | 2,433006244  | 2,271023131  | 0,161983113 |
| 225579_at    | PQLC3           | 2,003776245  | 1,841838775  | 0,16193747  |
| 210157_at    | URI1            | 3,296204798  | 3,134292219  | 0,161912579 |
| 1556038_at   | GPR173          | -0,888496123 | -1,050406615 | 0,161910492 |
| 1559667_at   | -               | -0,888496123 | -1,050406615 | 0,161910492 |
| 1560342_at   | -               | -0,888496123 | -1,050406615 | 0,161910492 |
| 1562639_at   | KIF6            | -0,888496123 | -1,050406615 | 0,161910492 |
| 207792_at    | OPRD1           | -0,888496123 | -1,050406615 | 0,161910492 |
| 210221_at    | CHRNA3          | -0,888496123 | -1,050406615 | 0,161910492 |
| 217433_at    | TACC1           | -0,888496123 | -1,050406615 | 0,161910492 |
| 222042_x_at  | MEX3D           | -0,888496123 | -1,050406615 | 0,161910492 |
| 233930_at    | DMRT3           | -0,888496123 | -1,050406615 | 0,161910492 |
| 234251_at    | -               | -0,888496123 | -1,050406615 | 0,161910492 |
| 236040_at    | XAGE3           | -0,888496123 | -1,050406615 | 0,161910492 |
| 236682_at    | -               | -0,888496123 | -1,050406615 | 0,161910492 |
| 236847_at    | C19orf18        | -0,888496123 | -1,050406615 | 0,161910492 |
| 236932_s_at  | GATAD2A         | -0,888496123 | -1,050406615 | 0,161910492 |
| 237598_at    | SEC1P           | -0,888496123 | -1,050406615 | 0,161910492 |
| 242416_at    | -               | -0,888496123 | -1,050406615 | 0,161910492 |
| 218529_at    | CD320           | 3,579258128  | 3,417357537  | 0,161900591 |
| 221824_s_at  | 08.03.15        | 1,434549838  | 1,272721751  | 0,161828087 |
| 226839_at    | NR2C2AP         | 2,146943689  | 1,98530622   | 0,161637469 |
| 240032_at    | -               | 0,641402394  | 0,479907041  | 0,161495354 |
| 1554827_a_at | ADCY7           | 0,715481152  | 0,553993624  | 0,161487527 |
| 212743_at    | RCHY1           | 0,715481152  | 0,553993624  | 0,161487527 |
| 218849_s_at  | PPP1R13L        | 0,715481152  | 0,553993624  | 0,161487527 |

|              |                 |              |              |             |  |
|--------------|-----------------|--------------|--------------|-------------|--|
| 220215_at    | ZNF669          | 0,715481152  | 0,553993624  | 0,161487527 |  |
| 204764_at    | CHURC1-FNTB     | 1,037706275  | 0,876248481  | 0,161457794 |  |
| 231022_at    | OCLN            | 1,201332287  | 1,039887232  | 0,161445055 |  |
| 232139_s_at  | KIAA1919        | 1,251994932  | 1,090553537  | 0,161441395 |  |
| 236220_at    | -               | 1,603688695  | 1,442269454  | 0,161419241 |  |
| 206096_at    | ZNF35           | 1,64218396   | 1,480766833  | 0,161417128 |  |
| 230653_at    | -               | 1,716223609  | 1,55481039   | 0,161413219 |  |
| 200705_s_at  | EEF1B2 /// SNOF | 6,893322346  | 6,73197677   | 0,161345575 |  |
| 234981_x_at  | CMBL            | 4,495352883  | 4,334242016  | 0,161110868 |  |
| 218447_at    | CMC2            | 5,00682487   | 4,845746475  | 0,161078395 |  |
| 1557646_at   | LOC100507240    | -3,07502285  | -3,236070201 | 0,161047351 |  |
| 1560099_at   | LOC339260       | -3,07502285  | -3,236070201 | 0,161047351 |  |
| 1560760_s_at | -               | -3,07502285  | -3,236070201 | 0,161047351 |  |
| 1568686_at   | ATP8B5P         | -3,07502285  | -3,236070201 | 0,161047351 |  |
| 1570046_at   | -               | -3,07502285  | -3,236070201 | 0,161047351 |  |
| 234597_at    | -               | -3,07502285  | -3,236070201 | 0,161047351 |  |
| 234623_x_at  | -               | -3,07502285  | -3,236070201 | 0,161047351 |  |
| 238584_at    | IQCA1           | -3,07502285  | -3,236070201 | 0,161047351 |  |
| 242098_at    | KIAA1244        | -3,07502285  | -3,236070201 | 0,161047351 |  |
| 201246_s_at  | OTUB1           | 1,442503549  | 1,281471383  | 0,161032165 |  |
| 203927_at    | NFKBIE          | 1,442503549  | 1,281471383  | 0,161032165 |  |
| 201138_s_at  | SSB             | 4,812419766  | 4,651455664  | 0,160964102 |  |
| 225546_at    | EEF2K           | 2,232003119  | 2,071071048  | 0,160932071 |  |
| 203440_at    | CDH2            | 3,628024221  | 3,467101363  | 0,160922857 |  |
| 224723_x_at  | LOC401397       | 4,487686025  | 4,326864571  | 0,160821454 |  |
| 213944_x_at  | GNA11           | 2,742596529  | 2,582026171  | 0,160570357 |  |
| 203582_s_at  | RAB4A /// SPHA  | 3,32230241   | 3,161800893  | 0,160501516 |  |
| 221522_at    | ANKRD27         | 5,249275201  | 5,088808057  | 0,160467144 |  |
| 34478_at     | RAB11B          | -1,239798046 | -1,400201104 | 0,160403058 |  |
| 212145_at    | MRPS27          | 4,034147209  | 3,873779903  | 0,160367307 |  |
| 226982_at    | ELL2            | 2,671625168  | 2,511262629  | 0,160362538 |  |
| 207768_at    | EGR4            | 2,238870125  | 2,078620836  | 0,160249289 |  |
| 222563_s_at  | TNKS2           | 0,798390451  | 0,638150376  | 0,160240075 |  |
| 203420_at    | FAM8A1          | 3,61576656   | 3,455550298  | 0,160216261 |  |
| 203756_at    | ARHGEF17        | 1,360921491  | 1,200746069  | 0,160175422 |  |
| 218780_at    | HOOK2           | 1,360921491  | 1,200746069  | 0,160175422 |  |
| 207891_s_at  | HAUS7 /// TREX2 | 1,314003737  | 1,153866761  | 0,160136975 |  |
| 201489_at    | PPIF            | 4,526087171  | 4,365953461  | 0,16013371  |  |
| 208159_x_at  | DDX11           | 2,338135744  | 2,17802703   | 0,160108713 |  |
| 218521_s_at  | UBE2W           | 0,57782909   | 0,417770464  | 0,160058627 |  |
| 228269_x_at  | KCNIP3          | 0,57782909   | 0,417770464  | 0,160058627 |  |
| 218433_at    | PANK3           | 1,215326747  | 1,055274826  | 0,160051921 |  |
| 219006_at    | NDUFAF4         | 5,337625064  | 5,177612232  | 0,160012832 |  |
| 242759_at    | -               | 0,496120222  | 0,336136178  | 0,159984044 |  |
| 230241_at    | TOR1AIP2        | 1,05337236   | 0,893473268  | 0,159899092 |  |
| 214583_at    | DDI2 /// RSC1A1 | 2,109966786  | 1,950068772  | 0,159898014 |  |
| 205361_s_at  | PFDN4           | 4,852893656  | 4,69303748   | 0,159856176 |  |
| 226318_at    | TBRG1           | 2,819431021  | 2,659583735  | 0,159847285 |  |
| 212507_at    | TMEM131         | 3,410096504  | 3,250254796  | 0,159841708 |  |
| 201029_s_at  | CD99            | 2,658027143  | 2,498185745  | 0,159841399 |  |
| 1564494_s_at | P4HB            | 4,341158978  | 4,181349409  | 0,159809569 |  |
| 1565845_at   | -               | 0,317354302  | 0,157549243  | 0,159805059 |  |
| 211805_s_at  | SLC8A1          | 0,317354302  | 0,157549243  | 0,159805059 |  |
| 213657_s_at  | -               | 0,317354302  | 0,157549243  | 0,159805059 |  |
| 231983_at    | IBA57           | 0,317354302  | 0,157549243  | 0,159805059 |  |
| 218204_s_at  | FYCO1           | 2,243430036  | 2,083632167  | 0,159797869 |  |

|              |                 |              |              |             |  |
|--------------|-----------------|--------------|--------------|-------------|--|
| 200752_s_at  | CAPN1           | 1,965648824  | 1,805902329  | 0,159746495 |  |
| 38447_at     | ADRBK1          | 2,560901553  | 2,401164389  | 0,159737164 |  |
| 227117_at    | XPOT            | 3,477451563  | 3,317734938  | 0,159716626 |  |
| 218073_s_at  | TMEM48          | 2,139623739  | 1,979940779  | 0,15968296  |  |
| 225432_s_at  | CSRP2BP         | 1,621313976  | 1,461646549  | 0,159667427 |  |
| 219148_at    | PBK             | 4,264153976  | 4,104540277  | 0,159613699 |  |
| 229235_at    | NFATC2IP        | 3,479385765  | 3,319860027  | 0,159525737 |  |
| 230165_at    | SGOL2           | 3,805796305  | 3,646288546  | 0,15950776  |  |
| 200823_x_at  | RPL29           | 7,436247072  | 7,276778786  | 0,159468287 |  |
| 221844_x_at  | SPCS3           | 5,08686793   | 4,927455161  | 0,159412769 |  |
| 1554771_at   | -               | -0,00073712  | -0,160136748 | 0,159399628 |  |
| 220242_x_at  | ZNF701          | -0,00073712  | -0,160136748 | 0,159399628 |  |
| 237414_at    | F7              | -0,00073712  | -0,160136748 | 0,159399628 |  |
| 1556822_s_at | ZNF837          | -0,85085127  | -1,010192375 | 0,159341105 |  |
| 1557906_at   | MUC12           | -0,85085127  | -1,010192375 | 0,159341105 |  |
| 205918_at    | SLC4A3          | -0,85085127  | -1,010192375 | 0,159341105 |  |
| 237840_at    | LOC388948       | -0,85085127  | -1,010192375 | 0,159341105 |  |
| 239837_at    | ADAM11          | -0,85085127  | -1,010192375 | 0,159341105 |  |
| 241389_at    | CHRN2           | -0,85085127  | -1,010192375 | 0,159341105 |  |
| 204847_at    | ZBTB11          | 3,992767659  | 3,833443169  | 0,15932449  |  |
| 203211_s_at  | MTMR2           | 3,755604375  | 3,596320795  | 0,15928358  |  |
| 1563431_x_at | CALM3           | 1,774096855  | 1,614891062  | 0,159205794 |  |
| 205369_x_at  | DBT             | 1,774096855  | 1,614891062  | 0,159205794 |  |
| 225390_s_at  | KLF13           | 1,774096855  | 1,614891062  | 0,159205794 |  |
| 201831_s_at  | USO1            | 2,14450783   | 1,98530622   | 0,15920161  |  |
| 214198_s_at  | DGCR2           | 1,940595304  | 1,781437557  | 0,159157747 |  |
| 228282_at    | MFSD8           | 1,940595304  | 1,781437557  | 0,159157747 |  |
| 219731_at    | CC2D2B          | 3,017453847  | 2,858346012  | 0,159107834 |  |
| 203983_at    | TSNAX           | 3,964737003  | 3,805658807  | 0,159078196 |  |
| 1557256_a_at | -               | -3,114791413 | -3,273861381 | 0,159069969 |  |
| 1562054_at   | SMEK3P          | -3,114791413 | -3,273861381 | 0,159069969 |  |
| 1563135_at   | -               | -3,114791413 | -3,273861381 | 0,159069969 |  |
| 217229_at    | ASB4            | -3,114791413 | -3,273861381 | 0,159069969 |  |
| 220502_s_at  | SLC13A1         | -3,114791413 | -3,273861381 | 0,159069969 |  |
| 220786_s_at  | SLC38A4         | -3,114791413 | -3,273861381 | 0,159069969 |  |
| 238441_at    | PRKAA2          | -3,114791413 | -3,273861381 | 0,159069969 |  |
| 240447_at    | -               | -3,114791413 | -3,273861381 | 0,159069969 |  |
| 241016_at    | -               | -3,114791413 | -3,273861381 | 0,159069969 |  |
| 242952_at    | -               | -3,114791413 | -3,273861381 | 0,159069969 |  |
| 243401_at    | -               | -3,114791413 | -3,273861381 | 0,159069969 |  |
| 229742_at    | C15orf61        | 3,598072957  | 3,439026336  | 0,159046621 |  |
| 227807_at    | PARP9           | 1,666156729  | 1,507116528  | 0,159040201 |  |
| 242264_at    | -               | 1,119359127  | 0,960386719  | 0,158972408 |  |
| 200798_x_at  | MCL1            | 5,487980577  | 5,329035945  | 0,158944632 |  |
| 203881_s_at  | DMD             | 4,034147209  | 3,875225653  | 0,158921556 |  |
| 208591_s_at  | PDE3B           | 1,063722698  | 0,904843258  | 0,158879439 |  |
| 208810_at    | DNAJB6 /// TMEM | 4,278110569  | 4,119256941  | 0,158853628 |  |
| 206889_at    | PDIA2           | -0,259832361 | -0,41858459  | 0,158752228 |  |
| 207527_at    | KCNJ9           | -0,259832361 | -0,41858459  | 0,158752228 |  |
| 220135_s_at  | SLC7A9          | -0,259832361 | -0,41858459  | 0,158752228 |  |
| 224374_s_at  | EMILIN2         | -0,259832361 | -0,41858459  | 0,158752228 |  |
| 228876_at    | BAIAP2L2        | -0,259832361 | -0,41858459  | 0,158752228 |  |
| 232405_at    | -               | -0,259832361 | -0,41858459  | 0,158752228 |  |
| 238841_at    | PTPDC1          | -0,259832361 | -0,41858459  | 0,158752228 |  |
| 242781_at    | FAM199X         | -0,259832361 | -0,41858459  | 0,158752228 |  |
| 207722_s_at  | BTBD2           | 0,592200562  | 0,433557298  | 0,158643263 |  |

|              |                |              |              |             |  |
|--------------|----------------|--------------|--------------|-------------|--|
| 238824_at    | -              | 0,592200562  | 0,433557298  | 0,158643263 |  |
| 242813_at    | -              | 0,592200562  | 0,433557298  | 0,158643263 |  |
| 208631_s_at  | HADHA          | 4,15705639   | 3,9984201    | 0,15863629  |  |
| 217922_at    | MAN1A2         | 2,898174856  | 2,739547836  | 0,15862702  |  |
| 204853_at    | ORC2           | 2,814842651  | 2,656223838  | 0,158618813 |  |
| 225425_s_at  | MRPL41         | 3,434229569  | 3,275657468  | 0,158572101 |  |
| 210455_at    | R3HCC1L        | 0,882651021  | 0,724100169  | 0,158550852 |  |
| 225761_at    | PAPD4          | 3,191547726  | 3,033010968  | 0,158536758 |  |
| 204900_x_at  | SAP30          | 4,521870506  | 4,363380228  | 0,158490278 |  |
| 200818_at    | ATP5O          | 6,793224861  | 6,634767296  | 0,158457565 |  |
| 212335_at    | GNS            | 2,355089531  | 2,196649505  | 0,158440026 |  |
| 214155_s_at  | LARP4          | 2,86748657   | 2,709065209  | 0,158421361 |  |
| 222574_s_at  | DHX40          | 2,979690938  | 2,821324225  | 0,158366714 |  |
| 209879_at    | SELPLG         | 0,425644434  | 0,26733076   | 0,158313674 |  |
| 228798_x_at  | MAZ            | 0,425644434  | 0,26733076   | 0,158313674 |  |
| 219899_x_at  | NDOR1          | 0,747935635  | 0,589657387  | 0,158278249 |  |
| 231927_at    | ATF6           | 0,747935635  | 0,589657387  | 0,158278249 |  |
| 216305_s_at  | GCFC2          | 1,917954284  | 1,759685182  | 0,158269102 |  |
| 227490_at    | WDFY2          | 1,917954284  | 1,759685182  | 0,158269102 |  |
| 1569039_s_at | ZNF677         | -1,173767127 | -1,332017329 | 0,158250202 |  |
| 1569827_at   | ATG7           | -1,173767127 | -1,332017329 | 0,158250202 |  |
| 210847_x_at  | TNFRSF25       | -1,173767127 | -1,332017329 | 0,158250202 |  |
| 214069_at    | ACSM2A /// ACS | -1,173767127 | -1,332017329 | 0,158250202 |  |
| 214161_at    | OSGIN2         | -1,173767127 | -1,332017329 | 0,158250202 |  |
| 215365_at    | CACNB2         | -1,173767127 | -1,332017329 | 0,158250202 |  |
| 215417_at    | EXOC6B         | -1,173767127 | -1,332017329 | 0,158250202 |  |
| 224505_s_at  | PLCD4          | -1,173767127 | -1,332017329 | 0,158250202 |  |
| 229830_at    | -              | -1,173767127 | -1,332017329 | 0,158250202 |  |
| 230827_at    | -              | -1,173767127 | -1,332017329 | 0,158250202 |  |
| 231184_at    | DHX8           | -1,173767127 | -1,332017329 | 0,158250202 |  |
| 233920_at    | -              | -1,173767127 | -1,332017329 | 0,158250202 |  |
| 236171_at    | ATP2C2         | -1,173767127 | -1,332017329 | 0,158250202 |  |
| 237423_at    | RSPO4          | -1,173767127 | -1,332017329 | 0,158250202 |  |
| 239943_x_at  | -              | -1,173767127 | -1,332017329 | 0,158250202 |  |
| 218092_s_at  | AGFG1          | 3,775418946  | 3,617207412  | 0,158211534 |  |
| 229198_at    | USP35          | 0,334552598  | 0,176436073  | 0,158116525 |  |
| 239422_at    | GPC2           | 0,334552598  | 0,176436073  | 0,158116525 |  |
| 217764_s_at  | RAB31          | 4,455622373  | 4,297510916  | 0,158111457 |  |
| 1554761_a_at | HEATR2         | 1,515954005  | 1,3579181    | 0,158035905 |  |
| 213124_at    | ZNF473         | 2,35929703   | 2,201267805  | 0,158029225 |  |
| 58308_at     | TRIM62         | 0,473009058  | 0,31498563   | 0,158023427 |  |
| 221096_s_at  | TMCO6          | 2,156646206  | 1,998633167  | 0,158013039 |  |
| 225769_at    | COG6           | 3,608715137  | 3,450709925  | 0,158005213 |  |
| 209878_s_at  | RELA           | 1,473887017  | 1,315948728  | 0,157938289 |  |
| 204170_s_at  | CKS2           | 6,290925919  | 6,133021341  | 0,157904578 |  |
| 205811_at    | POLG2          | 2,102456302  | 1,944570415  | 0,157885887 |  |
| 217880_at    | CDC27          | 3,789518787  | 3,631821253  | 0,157697534 |  |
| 222580_at    | ZNF644         | 3,931919671  | 3,77423254   | 0,157687131 |  |
| 201878_at    | ARIH1          | 2,017152618  | 1,859476797  | 0,157675822 |  |
| 225485_at    | CEP41          | 1,789769151  | 1,632095957  | 0,157673194 |  |
| 228853_at    | STYX           | 3,745192233  | 3,587527995  | 0,157664238 |  |
| 225599_s_at  | TRIQQ          | 1,187200746  | 1,029536893  | 0,157663853 |  |
| 1553770_a_at | SLAMF9         | 0,133056859  | -0,024572586 | 0,157629445 |  |
| 1558279_a_at | KDSR           | 0,133056859  | -0,024572586 | 0,157629445 |  |
| 203803_at    | PCYOX1         | 0,133056859  | -0,024572586 | 0,157629445 |  |
| 210325_at    | CD1A           | 0,133056859  | -0,024572586 | 0,157629445 |  |

|              |                 |              |              |             |  |
|--------------|-----------------|--------------|--------------|-------------|--|
| 227361_at    | HS3ST3B1        | 0,133056859  | -0,024572586 | 0,157629445 |  |
| 244177_at    | -               | 0,133056859  | -0,024572586 | 0,157629445 |  |
| 51192_at     | SSH3            | 0,291167349  | 0,133587671  | 0,157579679 |  |
| 228189_at    | BAG4            | 4,552510269  | 4,394968439  | 0,157541831 |  |
| 223403_s_at  | POLR1B          | 4,077568583  | 3,920040657  | 0,157527926 |  |
| 209761_s_at  | SP110           | 2,190100188  | 2,032717854  | 0,157382334 |  |
| 216841_s_at  | LOC100129518 /  | 2,26825514   | 2,110887591  | 0,15736755  |  |
| 222617_s_at  | FAM204A         | 3,177319542  | 3,019999252  | 0,157320289 |  |
| 204548_at    | STAR            | 0,020670649  | -0,136643983 | 0,157314632 |  |
| 210858_x_at  | ATM             | 0,020670649  | -0,136643983 | 0,157314632 |  |
| 205663_at    | PCBP3           | 2,605861638  | 2,448549499  | 0,157312139 |  |
| 34858_at     | KCTD2           | 2,424999855  | 2,267724404  | 0,157275452 |  |
| 1557945_at   | TCTE3           | 0,82905153   | 0,67181667   | 0,15723486  |  |
| 222436_s_at  | CHMP3 /// RNF1  | 3,081249977  | 2,924079008  | 0,15717097  |  |
| 223140_s_at  | DHX36           | 3,89689195   | 3,739727424  | 0,157164527 |  |
| 1561581_at   | -               | -3,15396682  | -3,311072652 | 0,157105832 |  |
| 1561912_at   | -               | -3,15396682  | -3,311072652 | 0,157105832 |  |
| 203489_at    | SIVA1           | 4,426844657  | 4,269747853  | 0,157096804 |  |
| 212555_at    | PRKAR1B         | 0,962260738  | 0,805216064  | 0,157044674 |  |
| 218241_at    | GOLGA5          | 3,899061119  | 3,742106442  | 0,156954677 |  |
| 1569949_at   | GRK5            | 1,247462054  | 1,090553537  | 0,156908517 |  |
| 238029_s_at  | SLC16A14        | 1,247462054  | 1,090553537  | 0,156908517 |  |
| 225159_s_at  | ELK4            | 2,947914474  | 2,791007185  | 0,156907289 |  |
| 218194_at    | REXO2           | 5,681862829  | 5,525047463  | 0,156815367 |  |
| 235759_at    | -               | 3,441193003  | 3,284389368  | 0,156803635 |  |
| 200630_x_at  | SET             | 6,717147417  | 6,56038354   | 0,156763878 |  |
| 226445_s_at  | TRIM41          | 2,05655332   | 1,899812471  | 0,156740849 |  |
| 1557918_s_at | SLC16A1         | 3,508091848  | 3,351366359  | 0,156725489 |  |
| 226995_at    | LOC642852       | 3,508091848  | 3,351366359  | 0,156725489 |  |
| 201079_at    | SYNGR2          | 3,966117062  | 3,809444866  | 0,156672196 |  |
| 40420_at     | STK10           | 1,950390104  | 1,793721801  | 0,156668303 |  |
| 211707_s_at  | IQCB1           | 2,710020346  | 2,553413592  | 0,156606754 |  |
| 211439_at    | SRSF7           | 1,143956113  | 0,987376598  | 0,156579516 |  |
| 214753_at    | N4BP2L2         | 1,143956113  | 0,987376598  | 0,156579516 |  |
| 1569008_at   | FAM201B /// LOC | 0,613492853  | 0,456918297  | 0,156574556 |  |
| 201588_at    | TXNL1           | 6,243628344  | 6,087128827  | 0,156499516 |  |
| 226786_at    | RFX1            | 2,654607516  | 2,498185745  | 0,156421772 |  |
| 225386_s_at  | HNRPLL          | 4,712357174  | 4,555975485  | 0,156381689 |  |
| 212299_at    | NEK9            | 3,423218668  | 3,266872397  | 0,156346271 |  |
| 236496_at    | DEGS2           | -0,234278768 | -0,39061235  | 0,156333583 |  |
| 201095_at    | DAP             | 2,352981171  | 2,196649505  | 0,156331666 |  |
| 215239_x_at  | ZNF273          | 2,352981171  | 2,196649505  | 0,156331666 |  |
| 225719_s_at  | MRPL55          | 2,352981171  | 2,196649505  | 0,156331666 |  |
| 1553536_at   | MBNL2           | -0,57445847  | -0,730778808 | 0,156320338 |  |
| 1553691_at   | B3GALNT2        | -0,57445847  | -0,730778808 | 0,156320338 |  |
| 1556069_s_at | HIF3A           | -0,57445847  | -0,730778808 | 0,156320338 |  |
| 207832_at    | BAIAP2          | -0,57445847  | -0,730778808 | 0,156320338 |  |
| 210583_at    | POLDIP3         | -0,57445847  | -0,730778808 | 0,156320338 |  |
| 213106_at    | ATP8A1          | -0,57445847  | -0,730778808 | 0,156320338 |  |
| 216439_at    | TNK2            | -0,57445847  | -0,730778808 | 0,156320338 |  |
| 225612_s_at  | B3GNT5 /// LOC  | -0,57445847  | -0,730778808 | 0,156320338 |  |
| 226187_at    | CDS1            | -0,57445847  | -0,730778808 | 0,156320338 |  |
| 232462_s_at  | A1BG-AS1        | -0,57445847  | -0,730778808 | 0,156320338 |  |
| 239350_at    | MARVELD3        | -0,57445847  | -0,730778808 | 0,156320338 |  |
| 239918_at    | -               | -0,57445847  | -0,730778808 | 0,156320338 |  |
| 240206_at    | TARS            | -0,57445847  | -0,730778808 | 0,156320338 |  |



|              |                |              |              |             |  |
|--------------|----------------|--------------|--------------|-------------|--|
| 244139_s_at  | -              | -0,57445847  | -0,730778808 | 0,156320338 |  |
| 219581_at    | TSEN2          | 2,768138014  | 2,611817827  | 0,156320187 |  |
| 221000_s_at  | KAZALD1        | 0,533835206  | 0,377530647  | 0,156304559 |  |
| 219427_at    | FAT4           | 2,55541096   | 2,39915583   | 0,15625513  |  |
| 218461_at    | GPN3           | 4,305625125  | 4,149442805  | 0,15618232  |  |
| 207239_s_at  | CDK16          | 1,805273023  | 1,64909809   | 0,156174933 |  |
| 205717_x_at  | PCDHGA1 /// PC | 1,40228911   | 1,246149888  | 0,156139221 |  |
| 218478_s_at  | ZCCHC8         | 3,217273782  | 3,061230246  | 0,156043536 |  |
| 1552807_a_at | SIGLEC10       | 4,129607882  | 3,973663955  | 0,155943927 |  |
| 220253_s_at  | LRP12          | 2,755423794  | 2,599625088  | 0,155798706 |  |
| 221781_s_at  | DNAJC10        | 2,755423794  | 2,599625088  | 0,155798706 |  |
| 218974_at    | SOBP           | 0,911589958  | 0,755840599  | 0,155749359 |  |
| 222918_at    | RAB9B          | 0,911589958  | 0,755840599  | 0,155749359 |  |
| 233350_s_at  | TEX264         | 0,911589958  | 0,755840599  | 0,155749359 |  |
| 205294_at    | BAIAP2         | 0,359971644  | 0,204310755  | 0,155660888 |  |
| 221811_at    | PGAP3          | 0,359971644  | 0,204310755  | 0,155660888 |  |
| 200669_s_at  | UBE2D3         | 6,117965209  | 5,962345958  | 0,155619251 |  |
| 208957_at    | ERP44          | 1,261018186  | 1,105412836  | 0,15560535  |  |
| 210044_s_at  | LYL1           | 5,02431927   | 4,868790444  | 0,155528826 |  |
| 225561_at    | SELT           | 4,206061174  | 4,050537457  | 0,155523717 |  |
| 212754_s_at  | MON2           | 2,127340679  | 1,971855016  | 0,155485663 |  |
| 1558445_at   | -              | 1,210676994  | 1,055274826  | 0,155402168 |  |
| 221752_at    | SSH1           | 2,522021211  | 2,366632651  | 0,15538856  |  |
| 1561726_s_at | -              | -0,79540287  | -0,950686014 | 0,155283145 |  |
| 1567030_at   | SH3GL1P2       | -0,79540287  | -0,950686014 | 0,155283145 |  |
| 206849_at    | GABRG2         | -0,79540287  | -0,950686014 | 0,155283145 |  |
| 207264_at    | KDELRL3        | -0,79540287  | -0,950686014 | 0,155283145 |  |
| 207274_at    | CHRENE         | -0,79540287  | -0,950686014 | 0,155283145 |  |
| 214990_at    | PIGO           | -0,79540287  | -0,950686014 | 0,155283145 |  |
| 223858_at    | ESRRB          | -0,79540287  | -0,950686014 | 0,155283145 |  |
| 223882_at    | FAM172A        | -0,79540287  | -0,950686014 | 0,155283145 |  |
| 230330_at    | PPM1D          | -0,79540287  | -0,950686014 | 0,155283145 |  |
| 231208_at    | -              | -0,79540287  | -0,950686014 | 0,155283145 |  |
| 232055_at    | SFXN1          | -0,79540287  | -0,950686014 | 0,155283145 |  |
| 237316_at    | ANKDD1A        | -0,79540287  | -0,950686014 | 0,155283145 |  |
| 237369_at    | -              | -0,79540287  | -0,950686014 | 0,155283145 |  |
| 242305_at    | LOC100507322 / | -0,79540287  | -0,950686014 | 0,155283145 |  |
| 219292_at    | THAP1          | 2,666540916  | 2,511262629  | 0,155278287 |  |
| 65884_at     | MAN1B1         | 1,339784194  | 1,184511019  | 0,155273175 |  |
| 205621_at    | ALKBH1         | 3,676882273  | 3,521663705  | 0,155218569 |  |
| 200652_at    | SSR2           | 5,249275201  | 5,094094626  | 0,155180575 |  |
| 209523_at    | TAF2           | 4,954075234  | 4,798904943  | 0,155170291 |  |
| 1562628_at   | KRT40          | -3,192553003 | -3,347710726 | 0,155157723 |  |
| 219895_at    | FAM70A         | -3,192553003 | -3,347710726 | 0,155157723 |  |
| 232305_at    | HMGCLL1        | -3,192553003 | -3,347710726 | 0,155157723 |  |
| 242118_x_at  | -              | -3,192553003 | -3,347710726 | 0,155157723 |  |
| 243126_x_at  | -              | -3,192553003 | -3,347710726 | 0,155157723 |  |
| 212338_at    | MYO1D          | 2,014487247  | 1,859476797  | 0,15501045  |  |
| 201439_at    | GBF1           | 1,414471577  | 1,259496994  | 0,154974583 |  |
| 225900_at    | EXOC6B         | 2,708372067  | 2,553413592  | 0,154958475 |  |
| 205704_s_at  | ATP6V0A2       | 3,330897748  | 3,175947691  | 0,154950057 |  |
| 226178_at    | SOCS4          | 3,590934306  | 3,436090594  | 0,154843712 |  |
| 211727_s_at  | COX11          | 3,792633459  | 3,637795954  | 0,154837505 |  |
| 232118_at    | -              | 1,709647566  | 1,55481039   | 0,154837175 |  |
| 225766_s_at  | TNPO1          | 3,89689195   | 3,742106442  | 0,154785508 |  |
| 207268_x_at  | ABI2           | 2,134723057  | 1,979940779  | 0,154782278 |  |

|              |                 |             |              |             |  |
|--------------|-----------------|-------------|--------------|-------------|--|
| 224059_s_at  | NUMBL           | 1,04816921  | 0,893473268  | 0,154695943 |  |
| 204838_s_at  | MLH3            | 1,672933557 | 1,518263577  | 0,154669979 |  |
| 1563808_at   | MCF2L           | 0,46522187  | 0,310717132  | 0,154504738 |  |
| 206908_s_at  | CLDN11          | 0,46522187  | 0,310717132  | 0,154504738 |  |
| 222358_x_at  | -               | 0,46522187  | 0,310717132  | 0,154504738 |  |
| 221509_at    | DENR            | 4,920655822 | 4,766161183  | 0,154494638 |  |
| 218283_at    | SS18L2          | 4,832231174 | 4,677791538  | 0,154439636 |  |
| 218289_s_at  | UBA5            | 3,373122675 | 3,218713651  | 0,154409024 |  |
| 225523_at    | CCDC142 /// MR  | 3,67603922  | 3,521663705  | 0,154375515 |  |
| 200748_s_at  | FTH1            | 6,661427392 | 6,507118179  | 0,154309212 |  |
| 212805_at    | PRUNE2          | 0,052199481 | -0,102100538 | 0,154300018 |  |
| 219601_s_at  | C10orf12        | 0,052199481 | -0,102100538 | 0,154300018 |  |
| 234343_s_at  | RASAL2          | 0,052199481 | -0,102100538 | 0,154300018 |  |
| 243389_at    | PRH1 /// PRH1-P | 0,052199481 | -0,102100538 | 0,154300018 |  |
| 211942_x_at  | RPL13A /// RPL1 | 7,589669872 | 7,435379856  | 0,154290016 |  |
| 203451_at    | LDB1            | 2,596981013 | 2,442710777  | 0,154270236 |  |
| 222893_s_at  | RPAP2           | 1,960118853 | 1,805902329  | 0,154216524 |  |
| 205450_at    | PHKA1           | 1,716223609 | 1,562009954  | 0,154213655 |  |
| 222183_x_at  | SNW1            | 1,716223609 | 1,562009954  | 0,154213655 |  |
| 227111_at    | ZBTB34          | 2,618203384 | 2,464004877  | 0,154198507 |  |
| 209576_at    | GNAI1           | 3,566577193 | 3,412387088  | 0,154190105 |  |
| 217043_s_at  | MFN1            | 2,827046023 | 2,672945617  | 0,154100406 |  |
| 202587_s_at  | AK1             | 0,376672223 | 0,222599095  | 0,154073129 |  |
| 234695_x_at  | FAM22A          | 0,376672223 | 0,222599095  | 0,154073129 |  |
| 202194_at    | TMED5           | 5,110149007 | 4,956087342  | 0,154061664 |  |
| 212914_at    | CBX7            | 0,792179257 | 0,638150376  | 0,15402888  |  |
| 220659_s_at  | C7orf43         | 0,792179257 | 0,638150376  | 0,15402888  |  |
| 205068_s_at  | ARHGAP26        | 1,114389003 | 0,960386719  | 0,154002284 |  |
| 223196_s_at  | SESN2           | 1,114389003 | 0,960386719  | 0,154002284 |  |
| 202597_at    | IRF6            | 3,266269388 | 3,112391743  | 0,153877645 |  |
| 244828_x_at  | NAF1            | 3,266269388 | 3,112391743  | 0,153877645 |  |
| 211392_s_at  | PATZ1           | 1,426552034 | 1,272721751  | 0,153830283 |  |
| 215942_s_at  | GTSE1           | 1,331241794 | 1,177496821  | 0,153744973 |  |
| 239133_at    | CTDSPL2         | 1,331241794 | 1,177496821  | 0,153744973 |  |
| 242300_at    | -               | 2,429008604 | 2,275409734  | 0,15359887  |  |
| 1554470_s_at | ZBTB44          | 1,000476627 | 0,847075464  | 0,153401164 |  |
| 218126_at    | FAM82A2         | 2,626954721 | 2,473581079  | 0,153373642 |  |
| 212352_s_at  | TMED10          | 5,7855532   | 5,632180175  | 0,153373025 |  |
| 208485_x_at  | CFLAR           | 1,726031811 | 1,572742379  | 0,153289432 |  |
| 213934_s_at  | ZNF23           | 1,726031811 | 1,572742379  | 0,153289432 |  |
| 211587_x_at  | CHRNA3          | 0,648296226 | 0,495031851  | 0,153264375 |  |
| 214372_x_at  | ERN2            | 0,648296226 | 0,495031851  | 0,153264375 |  |
| 243115_at    | -               | 0,648296226 | 0,495031851  | 0,153264375 |  |
| 211684_s_at  | DYNC112         | 4,9941977   | 4,840945211  | 0,153252489 |  |
| 242939_at    | TFDP1           | 2,361396186 | 2,208167653  | 0,153228534 |  |
| 224369_s_at  | FBXO38          | 2,433006244 | 2,27978304   | 0,153223204 |  |
| 231056_at    | LOC339352       | 2,456762221 | 2,303602088  | 0,153160133 |  |
| 223735_at    | ARL6            | 0,181384709 | 0,028364014  | 0,153020695 |  |
| 223778_at    | KIF9            | 0,181384709 | 0,028364014  | 0,153020695 |  |
| 230702_at    | -               | 0,181384709 | 0,028364014  | 0,153020695 |  |
| 235043_at    | FAM122A         | 0,181384709 | 0,028364014  | 0,153020695 |  |
| 216594_x_at  | AKR1C1          | 4,509619341 | 4,356668262  | 0,152951079 |  |
| 208831_x_at  | SUPT6H          | 1,973904239 | 1,820984782  | 0,152919457 |  |
| 203512_at    | TRAPPC3         | 3,302773593 | 3,149904996  | 0,152868598 |  |
| 223275_at    | PRMT6           | 3,183265014 | 3,030417996  | 0,152847018 |  |
| 1557820_at   | AFG3L2          | 5,410775419 | 5,257944504  | 0,152830915 |  |

|              |              |              |              |             |  |
|--------------|--------------|--------------|--------------|-------------|--|
| 205679_x_at  | ACAN         | -0,196756757 | -0,34958478  | 0,152828023 |  |
| 207176_s_at  | CD80         | -0,196756757 | -0,34958478  | 0,152828023 |  |
| 211808_s_at  | CREBBP       | -0,196756757 | -0,34958478  | 0,152828023 |  |
| 214174_s_at  | PDLIM4       | -0,196756757 | -0,34958478  | 0,152828023 |  |
| 215974_at    | -            | -0,196756757 | -0,34958478  | 0,152828023 |  |
| 243756_at    | -            | -0,196756757 | -0,34958478  | 0,152828023 |  |
| 203859_s_at  | PALM         | 0,57058931   | 0,417770464  | 0,152818847 |  |
| 205140_at    | FPGT         | 0,57058931   | 0,417770464  | 0,152818847 |  |
| 231815_at    | PHF12        | 0,57058931   | 0,417770464  | 0,152818847 |  |
| 222654_at    | IMPAD1       | 4,191091206  | 4,038328982  | 0,152762224 |  |
| 1554380_at   | NEK11        | -0,759588698 | -0,912331589 | 0,152742891 |  |
| 1554857_at   | ELMO2        | -0,759588698 | -0,912331589 | 0,152742891 |  |
| 1557729_at   | GRK5         | -0,759588698 | -0,912331589 | 0,152742891 |  |
| 1559307_s_at | RBL1         | -0,759588698 | -0,912331589 | 0,152742891 |  |
| 1569422_at   | FAM129C      | -0,759588698 | -0,912331589 | 0,152742891 |  |
| 202178_at    | PRKCZ        | -0,759588698 | -0,912331589 | 0,152742891 |  |
| 203726_s_at  | LAMA3        | -0,759588698 | -0,912331589 | 0,152742891 |  |
| 204694_at    | AFP          | -0,759588698 | -0,912331589 | 0,152742891 |  |
| 205096_at    | POM121       | -0,759588698 | -0,912331589 | 0,152742891 |  |
| 207925_at    | CST5         | -0,759588698 | -0,912331589 | 0,152742891 |  |
| 211682_x_at  | UGT2B28      | -0,759588698 | -0,912331589 | 0,152742891 |  |
| 212272_at    | LPIN1        | -0,759588698 | -0,912331589 | 0,152742891 |  |
| 213991_s_at  | HS3ST1       | -0,759588698 | -0,912331589 | 0,152742891 |  |
| 226985_at    | FGD5         | -0,759588698 | -0,912331589 | 0,152742891 |  |
| 233619_at    | -            | -0,759588698 | -0,912331589 | 0,152742891 |  |
| 239756_at    | -            | -0,759588698 | -0,912331589 | 0,152742891 |  |
| 241230_at    | CA12         | -0,759588698 | -0,912331589 | 0,152742891 |  |
| 218297_at    | FAM188A      | 1,732533761  | 1,579853228  | 0,152680533 |  |
| 201872_s_at  | ABCE1        | 5,243596157  | 5,090987226  | 0,152608931 |  |
| 218428_s_at  | REV1         | 3,101484927  | 2,949006836  | 0,152478091 |  |
| 216700_at    | TRIO         | 0,072842263  | -0,079522948 | 0,152365211 |  |
| 219741_x_at  | ZNF552       | 0,072842263  | -0,079522948 | 0,152365211 |  |
| 223563_at    | GNB1L        | 0,072842263  | -0,079522948 | 0,152365211 |  |
| 238656_at    | -            | 0,072842263  | -0,079522948 | 0,152365211 |  |
| 241689_at    | -            | 0,072842263  | -0,079522948 | 0,152365211 |  |
| 227470_at    | ZNF48        | 1,880387527  | 1,728030156  | 0,152357371 |  |
| 208146_s_at  | CPVL         | 2,243430036  | 2,091116676  | 0,152313361 |  |
| 215143_at    | DPY19L2P2    | 1,073999308  | 0,921731975  | 0,152267333 |  |
| 225042_s_at  | CSRNP2       | 1,073999308  | 0,921731975  | 0,152267333 |  |
| 213554_s_at  | CDV3         | 2,55541096   | 2,403170156  | 0,152240804 |  |
| 213203_at    | SNAPC5       | 3,231115193  | 3,078904771  | 0,152210422 |  |
| 225973_at    | TAP2         | 3,284083774  | 3,131875186  | 0,152208588 |  |
| 227105_at    | CSPP1        | 3,534378463  | 3,382199319  | 0,152179144 |  |
| 1561775_at   | -            | -3,250025915 | -3,402185466 | 0,152159551 |  |
| 244169_x_at  | -            | -3,250025915 | -3,402185466 | 0,152159551 |  |
| 212125_at    | RANGAP1      | 2,218170265  | 2,066015817  | 0,152154448 |  |
| 200002_at    | RPL35        | 7,612266859  | 7,46021759   | 0,152049269 |  |
| 38043_at     | FAM3A        | 1,514068246  | 1,36204866   | 0,152019586 |  |
| 202764_at    | STIM1        | 1,446464021  | 1,294497133  | 0,151966888 |  |
| 225514_at    | NOP9         | 1,446464021  | 1,294497133  | 0,151966888 |  |
| 1554553_s_at | YIF1B        | 3,796517367  | 3,644594022  | 0,151923345 |  |
| 218395_at    | ACTR6        | 3,193905507  | 3,042049843  | 0,151855664 |  |
| 201296_s_at  | WSB1         | 4,376357713  | 4,224525141  | 0,151832572 |  |
| 218961_s_at  | PNKP         | 1,742232072  | 1,590454215  | 0,151777857 |  |
| 224601_at    | LOC100507246 | 4,471743273  | 4,319980141  | 0,151763132 |  |
| 1560089_at   | LOC100289019 | 0,401366113  | 0,249604176  | 0,151761937 |  |

|              |                 |              |              |             |  |
|--------------|-----------------|--------------|--------------|-------------|--|
| 227197_at    | ARHGEF26        | 0,401366113  | 0,249604176  | 0,151761937 |  |
| 243909_x_at  | GUSBP4          | 0,401366113  | 0,249604176  | 0,151761937 |  |
| 235497_at    | LOC643837       | 1,139070151  | 0,987376598  | 0,151693553 |  |
| 225387_at    | TSPAN5          | 3,484209953  | 3,332545245  | 0,151664708 |  |
| 219360_s_at  | TRPM4           | 2,197169074  | 2,045615873  | 0,151553202 |  |
| 201454_s_at  | LOC100653042 /  | 3,19743497   | 3,045906378  | 0,151528592 |  |
| 243529_at    | MARS2           | 2,082235068  | 1,930732138  | 0,15150293  |  |
| 227488_at    | MGC16121 /// MI | 0,95671774   | 0,805216064  | 0,151501676 |  |
| 227563_at    | FAM27E3         | 0,95671774   | 0,805216064  | 0,151501676 |  |
| 207122_x_at  | SULT1A2         | 1,305306849  | 1,153866761  | 0,151440088 |  |
| 226370_at    | KLHL15          | 3,747601714  | 3,596320795  | 0,151280919 |  |
| 232296_s_at  | GFM1            | 2,254767157  | 2,103505212  | 0,151261945 |  |
| 219291_at    | DTWD1           | 2,609398637  | 2,458228496  | 0,151170142 |  |
| 226539_s_at  | CCDC42B         | 0,822971223  | 0,67181667   | 0,151154553 |  |
| 1561571_at   | LOC730139       | 0,30867765   | 0,157549243  | 0,151128407 |  |
| 216577_at    | -               | 0,30867765   | 0,157549243  | 0,151128407 |  |
| 232926_x_at  | ANKRD19P        | 1,027166904  | 0,876248481  | 0,150918423 |  |
| 204648_at    | NPR1            | 0,503742507  | 0,352836757  | 0,15090575  |  |
| 206446_s_at  | CELA2A /// CELA | 0,503742507  | 0,352836757  | 0,15090575  |  |
| 229723_at    | TAGAP           | 0,503742507  | 0,352836757  | 0,15090575  |  |
| 235239_at    | QSOX2           | 0,503742507  | 0,352836757  | 0,15090575  |  |
| 226430_at    | RELL1           | 2,410880861  | 2,259997914  | 0,150882947 |  |
| 225114_at    | AGPS            | 3,913439491  | 3,76256191   | 0,150877581 |  |
| 201564_s_at  | FSCN1 /// LOC10 | 3,32445605   | 3,173599504  | 0,150856546 |  |
| 218018_at    | PDXK            | 4,393896578  | 4,243120651  | 0,150775927 |  |
| 204347_at    | AK4 /// LOC1005 | 2,845159691  | 2,694398145  | 0,150761547 |  |
| 222427_s_at  | LARS            | 5,369653912  | 5,218906902  | 0,15074701  |  |
| 212164_at    | TMEM183A /// TM | 1,593009234  | 1,442269454  | 0,15073978  |  |
| 212490_at    | DNAJC8          | 1,593009234  | 1,442269454  | 0,15073978  |  |
| 235215_at    | ERCC4           | 1,67631007   | 1,525647381  | 0,15066269  |  |
| 218782_s_at  | ATAD2           | 5,044219854  | 4,89361379   | 0,150606064 |  |
| 1554819_a_at | ITGA11          | -0,172274514 | -0,322870281 | 0,150595767 |  |
| 1560509_at   | -               | -0,172274514 | -0,322870281 | 0,150595767 |  |
| 203642_s_at  | COBLL1          | -0,172274514 | -0,322870281 | 0,150595767 |  |
| 206080_at    | PLCH2           | -0,172274514 | -0,322870281 | 0,150595767 |  |
| 206683_at    | ZNF165          | -0,172274514 | -0,322870281 | 0,150595767 |  |
| 206813_at    | CTF1            | -0,172274514 | -0,322870281 | 0,150595767 |  |
| 213157_s_at  | LOC339166 /// W | -0,172274514 | -0,322870281 | 0,150595767 |  |
| 220307_at    | CD244           | -0,172274514 | -0,322870281 | 0,150595767 |  |
| 220449_at    | LOC79015        | -0,172274514 | -0,322870281 | 0,150595767 |  |
| 235068_at    | ZDHHC21         | -0,172274514 | -0,322870281 | 0,150595767 |  |
| 238886_at    | TMED10          | 0,209623097  | 0,059218869  | 0,150404229 |  |
| 238977_at    | MCM6            | 0,209623097  | 0,059218869  | 0,150404229 |  |
| 243338_at    | CSNK1A1         | 0,209623097  | 0,059218869  | 0,150404229 |  |
| 200967_at    | PPIB            | 6,463055332  | 6,312753142  | 0,15030219  |  |
| 223713_at    | RSPH3           | 0,417596971  | 0,26733076   | 0,150266211 |  |
| 231331_at    | -               | 0,417596971  | 0,26733076   | 0,150266211 |  |
| 213927_at    | MAP3K9          | 1,318332599  | 1,16809119   | 0,150241409 |  |
| 214721_x_at  | CDC42EP4        | 1,868628927  | 1,718396606  | 0,150232321 |  |
| 221797_at    | C17orf90        | 1,46610492   | 1,315948728  | 0,150156192 |  |
| 220482_s_at  | SERGEF          | 0,682279745  | 0,532164371  | 0,150115375 |  |
| 225210_s_at  | FAM103A1        | 4,751298963  | 4,601232927  | 0,150066036 |  |
| 200013_at    | RPL24           | 7,789050711  | 7,639040799  | 0,150009912 |  |
| 226700_at    | U2AF1L4         | 1,940595304  | 1,790660532  | 0,149934772 |  |
| 227407_at    | TAPT1           | 1,940595304  | 1,790660532  | 0,149934772 |  |
| 221825_at    | ANGEL2          | 2,889473182  | 2,739547836  | 0,149925346 |  |

|              |              |              |              |             |  |
|--------------|--------------|--------------|--------------|-------------|--|
| 1558250_s_at | -            | 1,215326747  | 1,065442793  | 0,149883954 |  |
| 224829_at    | CPEB4        | 1,215326747  | 1,065442793  | 0,149883954 |  |
| 201949_x_at  | CAPZB        | 4,859592153  | 4,709745554  | 0,149846598 |  |
| 232902_s_at  | RARS2        | 3,791855421  | 3,642048499  | 0,149806922 |  |
| 226284_at    | ZBTB2        | 2,446911392  | 2,297144887  | 0,149766505 |  |
| 1567214_a_at | PNN          | 4,342753543  | 4,192989865  | 0,149763678 |  |
| 1553458_at   | VSTM4        | -0,496991414 | -0,646746079 | 0,149754665 |  |
| 207838_x_at  | PBXIP1       | -0,496991414 | -0,646746079 | 0,149754665 |  |
| 230715_at    | ZNF518B      | -0,496991414 | -0,646746079 | 0,149754665 |  |
| 239059_at    | DNAH1        | -0,496991414 | -0,646746079 | 0,149754665 |  |
| 244015_at    | -            | -0,496991414 | -0,646746079 | 0,149754665 |  |
| 60815_at     | POLR2J4      | -0,777586431 | -0,927308905 | 0,149722473 |  |
| 212590_at    | RRAS2        | 3,821129803  | 3,671470423  | 0,149659379 |  |
| 65493_at     | HEATR6       | 1,375535468  | 1,225894807  | 0,149640661 |  |
| 232003_at    | PNMAL2       | 0,103263601  | -0,046302147 | 0,149565748 |  |
| 242390_at    | -            | 0,103263601  | -0,046302147 | 0,149565748 |  |
| 207595_s_at  | BMP1         | 0,606430281  | 0,456918297  | 0,149511984 |  |
| 224854_s_at  | SLAIN2       | 0,606430281  | 0,456918297  | 0,149511984 |  |
| 230046_at    | -            | 0,606430281  | 0,456918297  | 0,149511984 |  |
| 237247_at    | USP51        | 0,841135803  | 0,691645685  | 0,149490118 |  |
| 212289_at    | ANKRD12      | 1,473887017  | 1,324440845  | 0,149446172 |  |
| 224827_at    | UBTD2        | 1,841816345  | 1,692388143  | 0,149428203 |  |
| 222700_at    | ATL2         | 4,164288643  | 4,014909928  | 0,149378714 |  |
| 1554875_at   | CAMKMT       | -1,888254346 | -2,037551727 | 0,149297381 |  |
| 1562738_a_at | LOC100130855 | -1,888254346 | -2,037551727 | 0,149297381 |  |
| 1563082_at   | LINC00486    | -1,888254346 | -2,037551727 | 0,149297381 |  |
| 1569235_a_at | -            | -1,888254346 | -2,037551727 | 0,149297381 |  |
| 202335_s_at  | UBE2B        | -1,888254346 | -2,037551727 | 0,149297381 |  |
| 206990_at    | TNR          | -1,888254346 | -2,037551727 | 0,149297381 |  |
| 209168_at    | GPM6B        | -1,888254346 | -2,037551727 | 0,149297381 |  |
| 210412_at    | GRIN2B       | -1,888254346 | -2,037551727 | 0,149297381 |  |
| 210536_s_at  | SPAM1        | -1,888254346 | -2,037551727 | 0,149297381 |  |
| 216592_at    | MAGEC3       | -1,888254346 | -2,037551727 | 0,149297381 |  |
| 217239_x_at  | LOC100508797 | -1,888254346 | -2,037551727 | 0,149297381 |  |
| 228950_s_at  | WLS          | -1,888254346 | -2,037551727 | 0,149297381 |  |
| 231683_at    | GLYAT        | -1,888254346 | -2,037551727 | 0,149297381 |  |
| 233637_at    | DCAF8        | -1,888254346 | -2,037551727 | 0,149297381 |  |
| 234019_at    | -            | -1,888254346 | -2,037551727 | 0,149297381 |  |
| 237200_at    | -            | -1,888254346 | -2,037551727 | 0,149297381 |  |
| 239778_x_at  | -            | -1,888254346 | -2,037551727 | 0,149297381 |  |
| 241546_at    | SPATA5       | -1,888254346 | -2,037551727 | 0,149297381 |  |
| 217792_at    | SNX5         | 4,481426562  | 4,332138021  | 0,149288541 |  |
| 1553729_s_at | LRRC43       | -1,937711681 | -2,086984744 | 0,149273062 |  |
| 1555401_at   | SOHLH2       | -1,937711681 | -2,086984744 | 0,149273062 |  |
| 1557798_at   | CNPY2        | -1,937711681 | -2,086984744 | 0,149273062 |  |
| 1560924_at   | -            | -1,937711681 | -2,086984744 | 0,149273062 |  |
| 1561398_at   | -            | -1,937711681 | -2,086984744 | 0,149273062 |  |
| 1561693_at   | LOC400794    | -1,937711681 | -2,086984744 | 0,149273062 |  |
| 1563064_at   | -            | -1,937711681 | -2,086984744 | 0,149273062 |  |
| 1565882_at   | -            | -1,937711681 | -2,086984744 | 0,149273062 |  |
| 202363_at    | SPOCK1       | -1,937711681 | -2,086984744 | 0,149273062 |  |
| 207359_at    | CAMKK2       | -1,937711681 | -2,086984744 | 0,149273062 |  |
| 209198_s_at  | SYT11        | -1,937711681 | -2,086984744 | 0,149273062 |  |
| 210349_at    | CAMK4        | -1,937711681 | -2,086984744 | 0,149273062 |  |
| 216163_at    | -            | -1,937711681 | -2,086984744 | 0,149273062 |  |
| 216967_at    | GAP43        | -1,937711681 | -2,086984744 | 0,149273062 |  |

|              |              |              |              |             |  |
|--------------|--------------|--------------|--------------|-------------|--|
| 220434_at    | ADCK4        | -1,937711681 | -2,086984744 | 0,149273062 |  |
| 220718_at    | HEXA-AS1     | -1,937711681 | -2,086984744 | 0,149273062 |  |
| 221658_s_at  | IL21R        | -1,937711681 | -2,086984744 | 0,149273062 |  |
| 225937_at    | CUX1         | -1,937711681 | -2,086984744 | 0,149273062 |  |
| 232599_at    | EXOC6        | -1,937711681 | -2,086984744 | 0,149273062 |  |
| 232824_at    | -            | -1,937711681 | -2,086984744 | 0,149273062 |  |
| 233975_at    | PRNT         | -1,937711681 | -2,086984744 | 0,149273062 |  |
| 235360_at    | PLEKHM3      | -1,937711681 | -2,086984744 | 0,149273062 |  |
| 237694_at    | -            | -1,937711681 | -2,086984744 | 0,149273062 |  |
| 237704_at    | -            | -1,937711681 | -2,086984744 | 0,149273062 |  |
| 237923_at    | -            | -1,937711681 | -2,086984744 | 0,149273062 |  |
| 241309_at    | -            | -1,937711681 | -2,086984744 | 0,149273062 |  |
| 241559_at    | -            | -1,937711681 | -2,086984744 | 0,149273062 |  |
| 242391_at    | -            | -1,937711681 | -2,086984744 | 0,149273062 |  |
| 219646_at    | DEF8         | 3,5222335    | 3,373018423  | 0,149215077 |  |
| 207035_at    | SLC30A3      | 1,69307511   | 1,543943227  | 0,149131883 |  |
| 228101_at    | APBA1        | 1,69307511   | 1,543943227  | 0,149131883 |  |
| 230570_at    | EIF3H        | 1,69307511   | 1,543943227  | 0,149131883 |  |
| 155515_a_at  | FAM189B      | -1,812418401 | -1,961547147 | 0,149128746 |  |
| 1557633_at   | POM121L8P    | -1,812418401 | -1,961547147 | 0,149128746 |  |
| 1560026_at   | -            | -1,812418401 | -1,961547147 | 0,149128746 |  |
| 1569338_at   | -            | -1,812418401 | -1,961547147 | 0,149128746 |  |
| 1569580_a_at | -            | -1,812418401 | -1,961547147 | 0,149128746 |  |
| 216021_s_at  | GLRA3        | -1,812418401 | -1,961547147 | 0,149128746 |  |
| 220706_at    | ADAMTS7      | -1,812418401 | -1,961547147 | 0,149128746 |  |
| 220832_at    | TLR8         | -1,812418401 | -1,961547147 | 0,149128746 |  |
| 224050_s_at  | -            | -1,812418401 | -1,961547147 | 0,149128746 |  |
| 229151_at    | SLC14A1      | -1,812418401 | -1,961547147 | 0,149128746 |  |
| 232770_at    | TUSC3        | -1,812418401 | -1,961547147 | 0,149128746 |  |
| 233569_at    | COPG2        | -1,812418401 | -1,961547147 | 0,149128746 |  |
| 234027_at    | CCDC129      | -1,812418401 | -1,961547147 | 0,149128746 |  |
| 235956_at    | KIAA1377     | -1,812418401 | -1,961547147 | 0,149128746 |  |
| 240495_at    | -            | -1,812418401 | -1,961547147 | 0,149128746 |  |
| 241192_at    | -            | -1,812418401 | -1,961547147 | 0,149128746 |  |
| 242606_at    | -            | -1,812418401 | -1,961547147 | 0,149128746 |  |
| 223680_at    | ZNF607       | 2,827046023  | 2,677924589  | 0,149121434 |  |
| 203493_s_at  | CEP57        | 3,182077878  | 3,033010968  | 0,149066911 |  |
| 204794_at    | DUSP2        | 0,984222186  | 0,835239052  | 0,148983133 |  |
| 230098_at    | PHF20L1      | 0,984222186  | 0,835239052  | 0,148983133 |  |
| 232087_at    | CXorf23      | 0,984222186  | 0,835239052  | 0,148983133 |  |
| 213269_at    | ZNF248       | 0,917308734  | 0,768343791  | 0,148964944 |  |
| 1553202_at   | STOX1        | -2,01371626  | -2,162639771 | 0,148923511 |  |
| 1553534_at   | NLRP10       | -2,01371626  | -2,162639771 | 0,148923511 |  |
| 1554041_at   | TMEM239      | -2,01371626  | -2,162639771 | 0,148923511 |  |
| 1557214_at   | LOC100506107 | -2,01371626  | -2,162639771 | 0,148923511 |  |
| 1561038_at   | ZNF81        | -2,01371626  | -2,162639771 | 0,148923511 |  |
| 1563659_at   | HERC6        | -2,01371626  | -2,162639771 | 0,148923511 |  |
| 1566194_at   | -            | -2,01371626  | -2,162639771 | 0,148923511 |  |
| 1570635_at   | -            | -2,01371626  | -2,162639771 | 0,148923511 |  |
| 206178_at    | PLA2G5       | -2,01371626  | -2,162639771 | 0,148923511 |  |
| 215397_x_at  | -            | -2,01371626  | -2,162639771 | 0,148923511 |  |
| 223890_at    | -            | -2,01371626  | -2,162639771 | 0,148923511 |  |
| 228224_at    | PRELP        | -2,01371626  | -2,162639771 | 0,148923511 |  |
| 241143_at    | -            | -2,01371626  | -2,162639771 | 0,148923511 |  |
| 225270_at    | NEO1         | 1,774096855  | 1,6252386    | 0,148858255 |  |
| 1554112_a_at | ULK2         | -1,763254337 | -1,912089812 | 0,148835475 |  |

|              |                  |              |              |             |  |
|--------------|------------------|--------------|--------------|-------------|--|
| 1554665_at   | ZNF586           | -1,763254337 | -1,912089812 | 0,148835475 |  |
| 1554882_at   | ERCC8            | -1,763254337 | -1,912089812 | 0,148835475 |  |
| 1556387_at   | LOC100507389     | -1,763254337 | -1,912089812 | 0,148835475 |  |
| 1557707_at   | -                | -1,763254337 | -1,912089812 | 0,148835475 |  |
| 1560935_s_at | LOC284669        | -1,763254337 | -1,912089812 | 0,148835475 |  |
| 1564786_at   | LOC338667        | -1,763254337 | -1,912089812 | 0,148835475 |  |
| 1570318_at   | -                | -1,763254337 | -1,912089812 | 0,148835475 |  |
| 205828_at    | MMP3             | -1,763254337 | -1,912089812 | 0,148835475 |  |
| 206068_s_at  | ACADL            | -1,763254337 | -1,912089812 | 0,148835475 |  |
| 207155_at    | TBX5             | -1,763254337 | -1,912089812 | 0,148835475 |  |
| 207299_s_at  | GRM1             | -1,763254337 | -1,912089812 | 0,148835475 |  |
| 207399_at    | BFSP2            | -1,763254337 | -1,912089812 | 0,148835475 |  |
| 207889_at    | SARDH            | -1,763254337 | -1,912089812 | 0,148835475 |  |
| 211460_at    | TTY9A /// TTY    | -1,763254337 | -1,912089812 | 0,148835475 |  |
| 216991_at    | ZNF224           | -1,763254337 | -1,912089812 | 0,148835475 |  |
| 217355_at    | -                | -1,763254337 | -1,912089812 | 0,148835475 |  |
| 224048_at    | USP44            | -1,763254337 | -1,912089812 | 0,148835475 |  |
| 224208_at    | PLEKHA8          | -1,763254337 | -1,912089812 | 0,148835475 |  |
| 232458_at    | COL3A1           | -1,763254337 | -1,912089812 | 0,148835475 |  |
| 235243_at    | CLIP3            | -1,763254337 | -1,912089812 | 0,148835475 |  |
| 236206_at    | FAM53A           | -1,763254337 | -1,912089812 | 0,148835475 |  |
| 237871_x_at  | -                | -1,763254337 | -1,912089812 | 0,148835475 |  |
| 239052_at    | -                | -1,763254337 | -1,912089812 | 0,148835475 |  |
| 241670_x_at  | LOC729177        | -1,763254337 | -1,912089812 | 0,148835475 |  |
| 242227_at    | -                | -1,763254337 | -1,912089812 | 0,148835475 |  |
| 243104_at    | -                | -1,763254337 | -1,912089812 | 0,148835475 |  |
| 243743_at    | -                | -1,763254337 | -1,912089812 | 0,148835475 |  |
| 1563225_a_at | -                | -0,706943342 | -0,855751026 | 0,148807684 |  |
| 1566363_at   | DNTT             | -0,706943342 | -0,855751026 | 0,148807684 |  |
| 206328_at    | CDH15            | -0,706943342 | -0,855751026 | 0,148807684 |  |
| 207933_at    | ZP2              | -0,706943342 | -0,855751026 | 0,148807684 |  |
| 212728_at    | DLG3             | -0,706943342 | -0,855751026 | 0,148807684 |  |
| 215761_at    | DMXL2            | -0,706943342 | -0,855751026 | 0,148807684 |  |
| 218413_s_at  | ZNF639           | -0,706943342 | -0,855751026 | 0,148807684 |  |
| 218880_at    | FOSL2            | -0,706943342 | -0,855751026 | 0,148807684 |  |
| 231072_at    | MIDN             | -0,706943342 | -0,855751026 | 0,148807684 |  |
| 232677_at    | -                | -0,706943342 | -0,855751026 | 0,148807684 |  |
| 232910_at    | BBIP1            | -0,706943342 | -0,855751026 | 0,148807684 |  |
| 233428_at    | -                | -0,706943342 | -0,855751026 | 0,148807684 |  |
| 234200_at    | -                | -0,706943342 | -0,855751026 | 0,148807684 |  |
| 234322_at    | -                | -0,706943342 | -0,855751026 | 0,148807684 |  |
| 234380_x_at  | -                | -0,706943342 | -0,855751026 | 0,148807684 |  |
| 236825_at    | -                | -0,706943342 | -0,855751026 | 0,148807684 |  |
| 239384_at    | FLJ44342         | -0,706943342 | -0,855751026 | 0,148807684 |  |
| 74694_s_at   | RABEP2           | 1,614289682  | 1,465490932  | 0,14879875  |  |
| 218519_at    | SLC35A5          | 2,227406889  | 2,078620836  | 0,148786053 |  |
| 218239_s_at  | GTPBP4           | 5,23446293   | 5,085689237  | 0,148773693 |  |
| 209326_at    | SLC35A2          | 4,707414703  | 4,558677353  | 0,14873735  |  |
| 230327_at    | LOC730098        | 0,228146222  | 0,079428135  | 0,148718086 |  |
| 239774_at    | -                | 0,228146222  | 0,079428135  | 0,148718086 |  |
| 208805_at    | KIAA0391 /// PSN | 6,988791461  | 6,840082874  | 0,148708588 |  |
| 202296_s_at  | RER1             | 4,416786695  | 4,268097973  | 0,148688722 |  |
| 203306_s_at  | SLC35A1          | 4,476593042  | 4,327920804  | 0,148672238 |  |
| 200084_at    | C11orf58         | 5,649802912  | 5,501134613  | 0,148668298 |  |
| 225164_s_at  | EIF2AK4          | 1,850809354  | 1,702196344  | 0,14861301  |  |
| 216913_s_at  | RRP12            | 2,90394695   | 2,755336312  | 0,148610638 |  |

|              |              |              |              |             |  |
|--------------|--------------|--------------|--------------|-------------|--|
| 1556829_at   | TIPARP-AS1   | -2,063149277 | -2,211750327 | 0,14860105  |  |
| 1557645_at   | -            | -2,063149277 | -2,211750327 | 0,14860105  |  |
| 1558354_s_at | LOC100505725 | -2,063149277 | -2,211750327 | 0,14860105  |  |
| 1558652_at   | KANSL3       | -2,063149277 | -2,211750327 | 0,14860105  |  |
| 1561370_at   | LOC100505716 | -2,063149277 | -2,211750327 | 0,14860105  |  |
| 206680_at    | CD5L         | -2,063149277 | -2,211750327 | 0,14860105  |  |
| 214723_x_at  | ANKRD36      | -2,063149277 | -2,211750327 | 0,14860105  |  |
| 215710_at    | ST3GAL4      | -2,063149277 | -2,211750327 | 0,14860105  |  |
| 216209_at    | LOC400084    | -2,063149277 | -2,211750327 | 0,14860105  |  |
| 216405_at    | -            | -2,063149277 | -2,211750327 | 0,14860105  |  |
| 219153_s_at  | THSD4        | -2,063149277 | -2,211750327 | 0,14860105  |  |
| 223801_s_at  | APOL4        | -2,063149277 | -2,211750327 | 0,14860105  |  |
| 229658_at    | BAZ1B        | -2,063149277 | -2,211750327 | 0,14860105  |  |
| 232856_at    | LRRRC55      | -2,063149277 | -2,211750327 | 0,14860105  |  |
| 234233_s_at  | -            | -2,063149277 | -2,211750327 | 0,14860105  |  |
| 234411_x_at  | CD44         | -2,063149277 | -2,211750327 | 0,14860105  |  |
| 235567_at    | RORA         | -2,063149277 | -2,211750327 | 0,14860105  |  |
| 236342_at    | -            | -2,063149277 | -2,211750327 | 0,14860105  |  |
| 238017_at    | SDR16C5      | -2,063149277 | -2,211750327 | 0,14860105  |  |
| 242257_at    | -            | -2,063149277 | -2,211750327 | 0,14860105  |  |
| 242284_at    | LINC00466    | -2,063149277 | -2,211750327 | 0,14860105  |  |
| 205412_at    | ACAT1        | 4,208686884  | 4,060103278  | 0,148583606 |  |
| 1556285_s_at | PPA2         | 4,045288912  | 3,896739828  | 0,148549084 |  |
| 200892_s_at  | TRA2B        | 5,433900161  | 5,285389828  | 0,148510333 |  |
| 202923_s_at  | GCLC         | 3,939667505  | 3,79118048   | 0,148487025 |  |
| 1552580_at   | TRIML2       | -1,71423189  | -1,862647763 | 0,148415873 |  |
| 1556277_a_at | PAPD4        | -1,71423189  | -1,862647763 | 0,148415873 |  |
| 1556437_at   | LOC253805    | -1,71423189  | -1,862647763 | 0,148415873 |  |
| 1558346_at   | COX17        | -1,71423189  | -1,862647763 | 0,148415873 |  |
| 1560881_a_at | LINC00112    | -1,71423189  | -1,862647763 | 0,148415873 |  |
| 1567540_at   | -            | -1,71423189  | -1,862647763 | 0,148415873 |  |
| 205792_at    | WISP2        | -1,71423189  | -1,862647763 | 0,148415873 |  |
| 209872_s_at  | PKP3         | -1,71423189  | -1,862647763 | 0,148415873 |  |
| 215523_at    | ZNF391       | -1,71423189  | -1,862647763 | 0,148415873 |  |
| 216410_at    | -            | -1,71423189  | -1,862647763 | 0,148415873 |  |
| 229294_at    | JPH3         | -1,71423189  | -1,862647763 | 0,148415873 |  |
| 229639_s_at  | SLC19A1      | -1,71423189  | -1,862647763 | 0,148415873 |  |
| 231140_at    | TPPP2        | -1,71423189  | -1,862647763 | 0,148415873 |  |
| 232295_at    | GFM1         | -1,71423189  | -1,862647763 | 0,148415873 |  |
| 234507_at    | -            | -1,71423189  | -1,862647763 | 0,148415873 |  |
| 236947_at    | -            | -1,71423189  | -1,862647763 | 0,148415873 |  |
| 237818_at    | LARP6        | -1,71423189  | -1,862647763 | 0,148415873 |  |
| 241254_at    | -            | -1,71423189  | -1,862647763 | 0,148415873 |  |
| 241712_at    | CBY3         | -1,71423189  | -1,862647763 | 0,148415873 |  |
| 241729_at    | DOK6         | -1,71423189  | -1,862647763 | 0,148415873 |  |
| 242060_x_at  | PHF11        | -1,71423189  | -1,862647763 | 0,148415873 |  |
| 242460_at    | -            | -1,71423189  | -1,862647763 | 0,148415873 |  |
| 242936_at    | -            | -1,71423189  | -1,862647763 | 0,148415873 |  |
| 243353_at    | -            | -1,71423189  | -1,862647763 | 0,148415873 |  |
| 244198_at    | RANBP17      | -1,71423189  | -1,862647763 | 0,148415873 |  |
| 244546_at    | CYCS         | -1,71423189  | -1,862647763 | 0,148415873 |  |
| 1558460_at   | ABCC5        | 0,853119696  | 0,704715219  | 0,148404477 |  |
| 201054_at    | HNRNPA0      | 5,487139709  | 5,338762121  | 0,148377588 |  |
| 1568935_at   | -            | -3,32387526  | -3,472251727 | 0,148376467 |  |
| 208672_s_at  | SRSF3        | 6,577519271  | 6,429166008  | 0,148353264 |  |
| 218127_at    | NFYB         | 2,640847372  | 2,492544876  | 0,148302496 |  |



|              |                   |              |              |             |  |
|--------------|-------------------|--------------|--------------|-------------|--|
| 205095_s_at  | ATP6V0A1          | 0,702292136  | 0,553993624  | 0,148298512 |  |
| 241817_at    | C3orf62 /// MIR42 | 0,702292136  | 0,553993624  | 0,148298512 |  |
| 201376_s_at  | HNRNPF            | 3,117719377  | 2,969455976  | 0,148263401 |  |
| 225892_at    | IREB2             | 4,673180244  | 4,524995365  | 0,148184879 |  |
| 222230_s_at  | ACTR10            | 5,220364653  | 5,072200946  | 0,148163706 |  |
| 1553361_x_at | FBXL18            | 1,578645857  | 1,43051703   | 0,148128826 |  |
| 201157_s_at  | NMT1              | 3,86543671   | 3,717332003  | 0,148104707 |  |
| 1566954_at   | -                 | 0,44160593   | 0,293518836  | 0,148087094 |  |
| 221527_s_at  | PAR3              | 0,44160593   | 0,293518836  | 0,148087094 |  |
| 223791_at    | FAM27A /// FAM2   | 0,44160593   | 0,293518836  | 0,148087094 |  |
| 224375_at    | -                 | 0,44160593   | 0,293518836  | 0,148087094 |  |
| 241958_at    | -                 | 0,44160593   | 0,293518836  | 0,148087094 |  |
| 37652_at     | CABIN1            | 1,643909574  | 1,495882679  | 0,148026896 |  |
| 220419_s_at  | USP25             | 3,612245157  | 3,464222256  | 0,148022901 |  |
| 214060_at    | MIR5096 /// SSB   | 1,442503549  | 1,294497133  | 0,148006416 |  |
| 204782_at    | -                 | 0,995078803  | 0,847075464  | 0,148003339 |  |
| 206081_at    | SLC24A1           | 0,995078803  | 0,847075464  | 0,148003339 |  |
| 242007_at    | -                 | 0,995078803  | 0,847075464  | 0,148003339 |  |
| 225053_at    | CNOT7             | 6,154286309  | 6,006305764  | 0,147980546 |  |
| 212276_at    | LPIN1             | 1,394109935  | 1,246149888  | 0,147960047 |  |
| 227778_at    | HEATR7A /// LOC   | 1,394109935  | 1,246149888  | 0,147960047 |  |
| 236104_at    | HNRPLL            | 1,394109935  | 1,246149888  | 0,147960047 |  |
| 217047_s_at  | FAM13A            | 2,344516784  | 2,196649505  | 0,147867279 |  |
| 213801_x_at  | RPSA /// RPSAP    | 7,884373508  | 7,736568868  | 0,14780464  |  |
| 1553887_at   | C19orf75          | -2,138804305 | -2,286583451 | 0,147779145 |  |
| 1554121_at   | HSD17B12          | -2,138804305 | -2,286583451 | 0,147779145 |  |
| 1555671_at   | ICA1L             | -2,138804305 | -2,286583451 | 0,147779145 |  |
| 1556134_a_at | B3GNT5 /// LOC    | -2,138804305 | -2,286583451 | 0,147779145 |  |
| 1556472_s_at | SCML4             | -2,138804305 | -2,286583451 | 0,147779145 |  |
| 1556996_at   | -                 | -2,138804305 | -2,286583451 | 0,147779145 |  |
| 1560525_at   | -                 | -2,138804305 | -2,286583451 | 0,147779145 |  |
| 1562162_at   | -                 | -2,138804305 | -2,286583451 | 0,147779145 |  |
| 1562630_at   | -                 | -2,138804305 | -2,286583451 | 0,147779145 |  |
| 1564122_at   | LINC00514 /// LC  | -2,138804305 | -2,286583451 | 0,147779145 |  |
| 1566658_at   | LOC100507654      | -2,138804305 | -2,286583451 | 0,147779145 |  |
| 204529_s_at  | TOX               | -2,138804305 | -2,286583451 | 0,147779145 |  |
| 207034_s_at  | GLI2              | -2,138804305 | -2,286583451 | 0,147779145 |  |
| 207569_at    | ROS1              | -2,138804305 | -2,286583451 | 0,147779145 |  |
| 208053_at    | GUCY2F            | -2,138804305 | -2,286583451 | 0,147779145 |  |
| 210523_at    | BMPRI1B           | -2,138804305 | -2,286583451 | 0,147779145 |  |
| 213479_at    | NPTX2             | -2,138804305 | -2,286583451 | 0,147779145 |  |
| 216334_s_at  | CYP2A7P1          | -2,138804305 | -2,286583451 | 0,147779145 |  |
| 217481_x_at  | -                 | -2,138804305 | -2,286583451 | 0,147779145 |  |
| 227400_at    | NFIX              | -2,138804305 | -2,286583451 | 0,147779145 |  |
| 229960_at    | MAP3K6            | -2,138804305 | -2,286583451 | 0,147779145 |  |
| 231998_at    | SART1             | -2,138804305 | -2,286583451 | 0,147779145 |  |
| 232327_at    | THSD7B            | -2,138804305 | -2,286583451 | 0,147779145 |  |
| 233553_at    | -                 | -2,138804305 | -2,286583451 | 0,147779145 |  |
| 237057_at    | -                 | -2,138804305 | -2,286583451 | 0,147779145 |  |
| 238282_at    | -                 | -2,138804305 | -2,286583451 | 0,147779145 |  |
| 238426_at    | TMEM130           | -2,138804305 | -2,286583451 | 0,147779145 |  |
| 240182_at    | -                 | -2,138804305 | -2,286583451 | 0,147779145 |  |
| 240636_at    | -                 | -2,138804305 | -2,286583451 | 0,147779145 |  |
| 241917_at    | -                 | -2,138804305 | -2,286583451 | 0,147779145 |  |
| 242122_at    | -                 | -2,138804305 | -2,286583451 | 0,147779145 |  |
| 243375_at    | -                 | -2,138804305 | -2,286583451 | 0,147779145 |  |

|              |                   |              |              |             |  |
|--------------|-------------------|--------------|--------------|-------------|--|
| 244301_at    | -                 | -2,138804305 | -2,286583451 | 0,147779145 |  |
| 225254_at    | CCDC97            | 0,123193849  | -0,024572586 | 0,147766436 |  |
| 243624_at    | PIAS2             | 0,123193849  | -0,024572586 | 0,147766436 |  |
| 203635_at    | DSCR3             | 3,123915073  | 2,976208448  | 0,147706625 |  |
| 202616_s_at  | MECP2             | 1,709647566  | 1,562009954  | 0,147637611 |  |
| 227431_at    | RSBN1L-AS1        | 1,709647566  | 1,562009954  | 0,147637611 |  |
| 230009_at    | FAM118B           | 1,709647566  | 1,562009954  | 0,147637611 |  |
| 201323_at    | EBNA1BP2          | 4,734795999  | 4,58718675   | 0,147609248 |  |
| 243444_at    | SRD5A3            | 0,627515113  | 0,479907041  | 0,147608072 |  |
| 227369_at    | SERBP1            | 4,047898031  | 3,900294538  | 0,147603493 |  |
| 212396_s_at  | EMC1              | 3,170152481  | 3,022611001  | 0,14754148  |  |
| 226692_at    | C15orf63 /// MIR1 | 1,348276312  | 1,200746069  | 0,147530242 |  |
| 229500_at    | SLC30A9           | 1,348276312  | 1,200746069  | 0,147530242 |  |
| 1564459_at   | LOC100129427      | -1,639579028 | -1,787089803 | 0,147510775 |  |
| 1569022_a_at | PIK3C2A           | -1,639579028 | -1,787089803 | 0,147510775 |  |
| 1569841_x_at | -                 | -1,639579028 | -1,787089803 | 0,147510775 |  |
| 1570383_at   | BMP1              | -1,639579028 | -1,787089803 | 0,147510775 |  |
| 208360_s_at  | ERVH-4            | -1,639579028 | -1,787089803 | 0,147510775 |  |
| 209097_s_at  | JAG1              | -1,639579028 | -1,787089803 | 0,147510775 |  |
| 211876_x_at  | PCDHGA10 /// P    | -1,639579028 | -1,787089803 | 0,147510775 |  |
| 219465_at    | APOA2             | -1,639579028 | -1,787089803 | 0,147510775 |  |
| 227884_at    | TAF15             | -1,639579028 | -1,787089803 | 0,147510775 |  |
| 229221_at    | CD44              | -1,639579028 | -1,787089803 | 0,147510775 |  |
| 234820_at    | MAS1L             | -1,639579028 | -1,787089803 | 0,147510775 |  |
| 241163_at    | -                 | -1,639579028 | -1,787089803 | 0,147510775 |  |
| 242058_at    | -                 | -1,639579028 | -1,787089803 | 0,147510775 |  |
| 205845_at    | CACNA1H           | 0,541261317  | 0,393761504  | 0,147499812 |  |
| 219264_s_at  | PPP2R3B           | 0,541261317  | 0,393761504  | 0,147499812 |  |
| 208777_s_at  | PSMD11            | 5,15258632   | 5,005113369  | 0,14747295  |  |
| 210794_s_at  | MEG3              | 0,934330293  | 0,786897721  | 0,147432571 |  |
| 1556909_at   | LOC100505853      | -0,136301282 | -0,283667828 | 0,147366545 |  |
| 1569696_at   | LOC402779         | -0,136301282 | -0,283667828 | 0,147366545 |  |
| 205332_at    | RCE1              | -0,136301282 | -0,283667828 | 0,147366545 |  |
| 216800_at    | -                 | -0,136301282 | -0,283667828 | 0,147366545 |  |
| 236713_at    | -                 | -0,136301282 | -0,283667828 | 0,147366545 |  |
| 203065_s_at  | CAV1              | 5,208169782  | 5,060810624  | 0,147359158 |  |
| 205435_s_at  | AAK1              | -0,467091869 | -0,614371577 | 0,147279708 |  |
| 208544_at    | ADRA2B            | -0,467091869 | -0,614371577 | 0,147279708 |  |
| 227679_at    | HDAC11            | -0,467091869 | -0,614371577 | 0,147279708 |  |
| 231570_at    | FAM154A           | -0,467091869 | -0,614371577 | 0,147279708 |  |
| 233069_at    | PPP4R1L           | -0,467091869 | -0,614371577 | 0,147279708 |  |
| 238699_s_at  | CASK              | -0,467091869 | -0,614371577 | 0,147279708 |  |
| 241351_at    | -                 | -0,467091869 | -0,614371577 | 0,147279708 |  |
| 212255_s_at  | ATP2C1            | 2,566371329  | 2,419116683  | 0,147254646 |  |
| 203683_s_at  | VEGFB             | 0,351548291  | 0,204310755  | 0,147237536 |  |
| 209691_s_at  | DOK4              | 0,351548291  | 0,204310755  | 0,147237536 |  |
| 236609_at    | PMS1              | 0,351548291  | 0,204310755  | 0,147237536 |  |
| 205583_s_at  | ALG13             | 2,159061673  | 2,011838132  | 0,147223541 |  |
| 1552849_at   | C2orf65           | -2,187914861 | -2,335104118 | 0,147189257 |  |
| 1557627_at   | LOC283745         | -2,187914861 | -2,335104118 | 0,147189257 |  |
| 1557639_at   | NFIA              | -2,187914861 | -2,335104118 | 0,147189257 |  |
| 1557704_a_at | 07.03.15          | -2,187914861 | -2,335104118 | 0,147189257 |  |
| 1558497_a_at | LOC100505609      | -2,187914861 | -2,335104118 | 0,147189257 |  |
| 1559034_at   | SIRPB2            | -2,187914861 | -2,335104118 | 0,147189257 |  |
| 1560029_a_at | C11orf57          | -2,187914861 | -2,335104118 | 0,147189257 |  |
| 1565358_at   | RARA              | -2,187914861 | -2,335104118 | 0,147189257 |  |

|              |                |              |              |             |  |
|--------------|----------------|--------------|--------------|-------------|--|
| 1568633_a_at | -              | -2,187914861 | -2,335104118 | 0,147189257 |  |
| 1570202_a_at | MKL2           | -2,187914861 | -2,335104118 | 0,147189257 |  |
| 206377_at    | FOXF2          | -2,187914861 | -2,335104118 | 0,147189257 |  |
| 211556_at    | MAPRE2         | -2,187914861 | -2,335104118 | 0,147189257 |  |
| 216513_at    | DCT            | -2,187914861 | -2,335104118 | 0,147189257 |  |
| 216826_at    | -              | -2,187914861 | -2,335104118 | 0,147189257 |  |
| 219947_at    | CLEC4A         | -2,187914861 | -2,335104118 | 0,147189257 |  |
| 229403_at    | B4GALT1        | -2,187914861 | -2,335104118 | 0,147189257 |  |
| 233516_s_at  | SPAG17         | -2,187914861 | -2,335104118 | 0,147189257 |  |
| 233947_s_at  | TBX5-AS1       | -2,187914861 | -2,335104118 | 0,147189257 |  |
| 235379_at    | LOC100506114   | -2,187914861 | -2,335104118 | 0,147189257 |  |
| 237771_s_at  | -              | -2,187914861 | -2,335104118 | 0,147189257 |  |
| 239510_at    | -              | -2,187914861 | -2,335104118 | 0,147189257 |  |
| 241025_at    | UTP6           | -2,187914861 | -2,335104118 | 0,147189257 |  |
| 242660_at    | C10orf112      | -2,187914861 | -2,335104118 | 0,147189257 |  |
| 242852_at    | LOC285147      | -2,187914861 | -2,335104118 | 0,147189257 |  |
| 243510_at    | LOC100506418   | -2,187914861 | -2,335104118 | 0,147189257 |  |
| 218705_s_at  | SNX24          | 0,715481152  | 0,568365095  | 0,147116056 |  |
| 238574_at    | SLC25A51       | 0,715481152  | 0,568365095  | 0,147116056 |  |
| 243475_at    | CBL            | 0,715481152  | 0,568365095  | 0,147116056 |  |
| 219633_at    | TTPAL          | 2,886560922  | 2,739547836  | 0,147013086 |  |
| 211752_s_at  | NDUFS7         | 3,886725813  | 3,739727424  | 0,14699839  |  |
| 212135_s_at  | ATP2B4         | 2,696781084  | 2,549796788  | 0,146984296 |  |
| 225910_at    | HELZ           | 2,132266459  | 1,98530622   | 0,146960239 |  |
| 202228_s_at  | NPTN           | 5,918559225  | 5,771649566  | 0,146909659 |  |
| 218446_s_at  | FAM18B1        | 3,234554895  | 3,087661492  | 0,146893403 |  |
| 212415_at    | 38961          | 0,87091093   | 0,724100169  | 0,146810761 |  |
| 232063_x_at  | FARSB          | 0,87091093   | 0,724100169  | 0,146810761 |  |
| 1559915_at   | -              | -1,591296941 | -1,738067356 | 0,146770414 |  |
| 1560002_at   | FAM27A         | -1,591296941 | -1,738067356 | 0,146770414 |  |
| 1561487_at   | -              | -1,591296941 | -1,738067356 | 0,146770414 |  |
| 1561853_a_at | IL23R          | -1,591296941 | -1,738067356 | 0,146770414 |  |
| 1563587_at   | CDH4           | -1,591296941 | -1,738067356 | 0,146770414 |  |
| 1568717_a_at | FKBP15         | -1,591296941 | -1,738067356 | 0,146770414 |  |
| 1569283_at   | ZNF891         | -1,591296941 | -1,738067356 | 0,146770414 |  |
| 1570592_a_at | -              | -1,591296941 | -1,738067356 | 0,146770414 |  |
| 221160_s_at  | CABP5          | -1,591296941 | -1,738067356 | 0,146770414 |  |
| 221329_at    | OR52A1         | -1,591296941 | -1,738067356 | 0,146770414 |  |
| 232334_at    | NXPH2          | -1,591296941 | -1,738067356 | 0,146770414 |  |
| 233432_at    | LINC00598      | -1,591296941 | -1,738067356 | 0,146770414 |  |
| 234263_at    | -              | -1,591296941 | -1,738067356 | 0,146770414 |  |
| 204205_at    | APOBEC3G       | 2,549899391  | 2,403170156  | 0,146729235 |  |
| 222487_s_at  | RPS27L         | 3,408067074  | 3,261354437  | 0,146712637 |  |
| 218120_s_at  | HMOX2          | 2,433006244  | 2,286318242  | 0,146688003 |  |
| 211160_x_at  | ACTN1          | 3,769898242  | 3,623242814  | 0,146655428 |  |
| 225585_at    | RAP2A          | 3,952256707  | 3,805658807  | 0,1465979   |  |
| 200970_s_at  | SERP1          | 4,265835914  | 4,119256941  | 0,146578972 |  |
| 212527_at    | DESI1          | 1,596577845  | 1,450051551  | 0,146526294 |  |
| 1555522_s_at | DPY30 /// MEMO | 3,137452663  | 2,990953566  | 0,146499097 |  |
| 232420_x_at  | LOC100289341   | 1,874520207  | 1,728030156  | 0,14649005  |  |
| 208885_at    | LCP1           | 4,232392431  | 4,085930792  | 0,146461639 |  |
| 203511_s_at  | TRAPPC3        | 3,495722611  | 3,349287209  | 0,146435402 |  |
| 204178_s_at  | RBM14          | 3,308224834  | 3,161800893  | 0,146423941 |  |
| 213243_at    | VPS13B         | 2,979690938  | 2,833274877  | 0,146416061 |  |
| 220183_s_at  | NUDT6          | 1,360921491  | 1,214517879  | 0,146403612 |  |
| 223329_x_at  | SUGT1          | 4,99030312   | 4,843901726  | 0,146401395 |  |

|             |                 |              |              |             |  |
|-------------|-----------------|--------------|--------------|-------------|--|
| 240419_at   | SLC6A15         | 0,641402394  | 0,495031851  | 0,146370544 |  |
| 203161_s_at | RNF8            | -0,67289328  | -0,819238336 | 0,146345056 |  |
| 206010_at   | HABP2           | -0,67289328  | -0,819238336 | 0,146345056 |  |
| 234688_x_at | CNTROB          | -0,67289328  | -0,819238336 | 0,146345056 |  |
| 235496_at   | HRCT1           | -0,67289328  | -0,819238336 | 0,146345056 |  |
| 235835_at   | -               | -0,67289328  | -0,819238336 | 0,146345056 |  |
| 236321_at   | FAM200B         | -0,67289328  | -0,819238336 | 0,146345056 |  |
| 236869_at   | -               | -0,67289328  | -0,819238336 | 0,146345056 |  |
| 237323_at   | HKDC1           | -0,67289328  | -0,819238336 | 0,146345056 |  |
| 212579_at   | SMCHD1          | 3,296204798  | 3,149904996  | 0,146299803 |  |
| 219923_at   | TRIM45          | 0,255492549  | 0,109221392  | 0,146271157 |  |
| 222391_at   | TMEM30A         | 4,109766258  | 3,963505394  | 0,146260864 |  |
| 219317_at   | POLI            | 1,079110292  | 0,932882274  | 0,146228018 |  |
| 223325_at   | TXNDC11         | 1,079110292  | 0,932882274  | 0,146228018 |  |
| 225781_at   | MAPK9           | 1,726031811  | 1,579853228  | 0,146178582 |  |
| 231984_at   | MTAP            | 2,860082603  | 2,713921281  | 0,146161322 |  |
| 208945_s_at | BECN1           | 2,983784569  | 2,837730973  | 0,146053596 |  |
| 205462_s_at | HPCAL1          | 2,535098095  | 2,389070873  | 0,146027222 |  |
| 219537_x_at | DLL3            | 1,880387527  | 1,73441697   | 0,145970557 |  |
| 1561691_at  | LINC00326       | -2,262747984 | -2,408705138 | 0,145957153 |  |
| 1562866_at  | -               | -2,262747984 | -2,408705138 | 0,145957153 |  |
| 1566339_at  | SNORD8          | -2,262747984 | -2,408705138 | 0,145957153 |  |
| 211741_x_at | PSG3            | -2,262747984 | -2,408705138 | 0,145957153 |  |
| 213824_at   | OLIG2           | -2,262747984 | -2,408705138 | 0,145957153 |  |
| 216120_s_at | ATP2B2          | -2,262747984 | -2,408705138 | 0,145957153 |  |
| 217360_x_at | IGHA1 /// IGHG1 | -2,262747984 | -2,408705138 | 0,145957153 |  |
| 219524_s_at | NDUFAF5         | -2,262747984 | -2,408705138 | 0,145957153 |  |
| 219645_at   | CASQ1           | -2,262747984 | -2,408705138 | 0,145957153 |  |
| 219928_s_at | CABYR           | -2,262747984 | -2,408705138 | 0,145957153 |  |
| 224343_x_at | YME1L1          | -2,262747984 | -2,408705138 | 0,145957153 |  |
| 226755_at   | MIR205HG        | -2,262747984 | -2,408705138 | 0,145957153 |  |
| 232477_at   | -               | -2,262747984 | -2,408705138 | 0,145957153 |  |
| 236971_at   | -               | -2,262747984 | -2,408705138 | 0,145957153 |  |
| 237086_at   | FOXA1           | -2,262747984 | -2,408705138 | 0,145957153 |  |
| 238217_at   | -               | -2,262747984 | -2,408705138 | 0,145957153 |  |
| 239977_at   | C12orf42        | -2,262747984 | -2,408705138 | 0,145957153 |  |
| 242084_at   | LOC339316       | -2,262747984 | -2,408705138 | 0,145957153 |  |
| 242709_s_at | -               | -2,262747984 | -2,408705138 | 0,145957153 |  |
| 242906_at   | SESN3           | -2,262747984 | -2,408705138 | 0,145957153 |  |
| 244655_at   | LOC100507311    | -2,262747984 | -2,408705138 | 0,145957153 |  |
| 224615_x_at | HM13            | 2,466546243  | 2,320681318  | 0,145864925 |  |
| 218898_at   | FAM57A          | 2,952099138  | 2,806245339  | 0,145853799 |  |
| 237215_s_at | TFRC            | 3,604290432  | 3,458446747  | 0,145843685 |  |
| 214039_s_at | LAPTM4B         | 6,781073846  | 6,63524734   | 0,145826506 |  |
| 218437_s_at | LZTFL1          | 1,689737652  | 1,543943227  | 0,145794424 |  |
| 228613_at   | RAB11FIP3       | 1,261018186  | 1,115234684  | 0,145783501 |  |
| 211612_s_at | IL13RA1         | 0,882651021  | 0,73688026   | 0,14577076  |  |
| 203858_s_at | COX10           | 2,491678455  | 2,345926937  | 0,145751519 |  |
| 223270_at   | CTDSPL2         | 2,261526912  | 2,115788273  | 0,145738639 |  |
| 228662_at   | SOCS7           | 2,261526912  | 2,115788273  | 0,145738639 |  |
| 212307_s_at | OGT             | 2,901063789  | 2,755336312  | 0,145727478 |  |
| 209675_s_at | HNRNPUL1        | 1,987559146  | 1,841838775  | 0,145720372 |  |
| 205035_at   | CTDP1           | 1,369290453  | 1,223626587  | 0,145663865 |  |
| 227150_at   | MTF1            | 1,369290453  | 1,223626587  | 0,145663865 |  |
| 232981_s_at | SYNRG           | 1,021868205  | 0,876248481  | 0,145619724 |  |
| 223153_x_at | TMUB1           | 2,470441349  | 2,324919719  | 0,14552163  |  |

|              |                   |              |              |             |  |
|--------------|-------------------|--------------|--------------|-------------|--|
| 228159_at    | -                 | 2,713311265  | 2,567790814  | 0,145520451 |  |
| 204691_x_at  | PLA2G6            | 2,236584753  | 2,091116676  | 0,145468077 |  |
| 202370_s_at  | CBFB              | 4,61981709   | 4,474382017  | 0,145435073 |  |
| 1555735_a_at | BAP1              | 0,735041319  | 0,589657387  | 0,145383932 |  |
| 202817_s_at  | SS18              | 2,652894659  | 2,507538456  | 0,145356203 |  |
| 1556400_at   | -                 | -1,518072576 | -1,663414495 | 0,145341919 |  |
| 1561460_at   | -                 | -1,518072576 | -1,663414495 | 0,145341919 |  |
| 1566868_at   | -                 | -1,518072576 | -1,663414495 | 0,145341919 |  |
| 205306_x_at  | KMO               | -1,518072576 | -1,663414495 | 0,145341919 |  |
| 206831_s_at  | ARSD              | -1,518072576 | -1,663414495 | 0,145341919 |  |
| 207101_at    | VAMP1             | -1,518072576 | -1,663414495 | 0,145341919 |  |
| 208607_s_at  | SAA1 /// SAA2 /// | -1,518072576 | -1,663414495 | 0,145341919 |  |
| 211171_s_at  | PDE10A            | -1,518072576 | -1,663414495 | 0,145341919 |  |
| 213472_at    | HNRNPH1           | -1,518072576 | -1,663414495 | 0,145341919 |  |
| 213904_at    | -                 | -1,518072576 | -1,663414495 | 0,145341919 |  |
| 214865_at    | DOT1L             | -1,518072576 | -1,663414495 | 0,145341919 |  |
| 223816_at    | SLC46A2           | -1,518072576 | -1,663414495 | 0,145341919 |  |
| 233054_at    | CNOT2             | -1,518072576 | -1,663414495 | 0,145341919 |  |
| 233314_at    | -                 | -1,518072576 | -1,663414495 | 0,145341919 |  |
| 236617_at    | -                 | -1,518072576 | -1,663414495 | 0,145341919 |  |
| 237223_at    | -                 | -1,518072576 | -1,663414495 | 0,145341919 |  |
| 1552432_at   | MFSD6L            | -0,112808516 | -0,258114234 | 0,145305717 |  |
| 1556123_a_at | RAB11B-AS1        | -0,112808516 | -0,258114234 | 0,145305717 |  |
| 210510_s_at  | NRP1              | -0,112808516 | -0,258114234 | 0,145305717 |  |
| 217644_s_at  | SOS2              | -0,112808516 | -0,258114234 | 0,145305717 |  |
| 228154_at    | C19orf44          | -0,112808516 | -0,258114234 | 0,145305717 |  |
| 232763_at    | TLN1              | -0,112808516 | -0,258114234 | 0,145305717 |  |
| 236482_at    | -                 | -0,112808516 | -0,258114234 | 0,145305717 |  |
| 238158_at    | MEIG1             | -0,112808516 | -0,258114234 | 0,145305717 |  |
| 223065_s_at  | STARD3NL          | 5,448784246  | 5,303490367  | 0,145293879 |  |
| 205268_s_at  | ADD2              | 1,210676994  | 1,065442793  | 0,145234201 |  |
| 1554943_at   | VIL1              | 0,152582607  | 0,007421914  | 0,145160693 |  |
| 202700_s_at  | TMEM63A           | 0,152582607  | 0,007421914  | 0,145160693 |  |
| 209237_s_at  | SLC23A2           | 0,152582607  | 0,007421914  | 0,145160693 |  |
| 231934_at    | TRIM14            | 0,152582607  | 0,007421914  | 0,145160693 |  |
| 232463_at    | PPP2R3B-AS1       | 0,152582607  | 0,007421914  | 0,145160693 |  |
| 226715_at    | FOXK1             | 2,522021211  | 2,376875125  | 0,145146086 |  |
| 222669_s_at  | SBDS /// SBDSP    | 4,628558674  | 4,483415907  | 0,145142766 |  |
| 1556639_at   | LOC439914         | -2,311268652 | -2,456406426 | 0,145137775 |  |
| 1556913_a_at | GIT2              | -2,311268652 | -2,456406426 | 0,145137775 |  |
| 1557672_s_at | LOC100133308      | -2,311268652 | -2,456406426 | 0,145137775 |  |
| 1559848_at   | NSUN4             | -2,311268652 | -2,456406426 | 0,145137775 |  |
| 1560020_at   | DNAJC13           | -2,311268652 | -2,456406426 | 0,145137775 |  |
| 1570122_at   | -                 | -2,311268652 | -2,456406426 | 0,145137775 |  |
| 203397_s_at  | GALNT3            | -2,311268652 | -2,456406426 | 0,145137775 |  |
| 207497_s_at  | MS4A2             | -2,311268652 | -2,456406426 | 0,145137775 |  |
| 208214_at    | ADRB1             | -2,311268652 | -2,456406426 | 0,145137775 |  |
| 217280_x_at  | GABRA5            | -2,311268652 | -2,456406426 | 0,145137775 |  |
| 219738_s_at  | PCDH9             | -2,311268652 | -2,456406426 | 0,145137775 |  |
| 220211_at    | FLJ13224          | -2,311268652 | -2,456406426 | 0,145137775 |  |
| 229516_at    | WDR31             | -2,311268652 | -2,456406426 | 0,145137775 |  |
| 231614_at    | NOVA1             | -2,311268652 | -2,456406426 | 0,145137775 |  |
| 232654_s_at  | UGT1A6            | -2,311268652 | -2,456406426 | 0,145137775 |  |
| 234527_at    | -                 | -2,311268652 | -2,456406426 | 0,145137775 |  |
| 235362_at    | LOC729970         | -2,311268652 | -2,456406426 | 0,145137775 |  |
| 236659_x_at  | -                 | -2,311268652 | -2,456406426 | 0,145137775 |  |

|              |                 |              |              |             |  |
|--------------|-----------------|--------------|--------------|-------------|--|
| 239620_at    | TTC23L          | -2,311268652 | -2,456406426 | 0,145137775 |  |
| 243728_at    | LOC100505750    | -2,311268652 | -2,456406426 | 0,145137775 |  |
| 244620_at    | SLC8A1-AS1      | -2,311268652 | -2,456406426 | 0,145137775 |  |
| 202187_s_at  | PPP2R5A         | 2,908260915  | 2,763166224  | 0,145094691 |  |
| 219008_at    | C2orf43         | 1,926486359  | 1,781437557  | 0,145048802 |  |
| 222585_x_at  | KRCC1           | 0,962260738  | 0,817300337  | 0,144960401 |  |
| 1553952_at   | ZDHHC19         | 1,094335495  | 0,949447784  | 0,144887711 |  |
| 1556047_s_at | MAGEE1          | 1,094335495  | 0,949447784  | 0,144887711 |  |
| 208748_s_at  | FLOT1           | 1,094335495  | 0,949447784  | 0,144887711 |  |
| 221194_s_at  | RNFT1           | 1,894952274  | 1,750261389  | 0,144690885 |  |
| 226069_at    | PRICKLE1        | 2,573632254  | 2,428994491  | 0,144637763 |  |
| 1555202_a_at | RPRD1A          | 1,274448124  | 1,129843209  | 0,144604915 |  |
| 238076_at    | GATAD2B         | 1,381753566  | 1,23718272   | 0,144570847 |  |
| 1555306_a_at | ECE2            | 0,661985843  | 0,51742585   | 0,144559992 |  |
| 205966_at    | TAF13           | 0,661985843  | 0,51742585   | 0,144559992 |  |
| 215260_s_at  | TCF3            | 0,661985843  | 0,51742585   | 0,144559992 |  |
| 238108_at    | -               | 0,661985843  | 0,51742585   | 0,144559992 |  |
| 221925_s_at  | CSPP1           | 1,481627361  | 1,337086025  | 0,144541336 |  |
| 205672_at    | XPA             | 1,575032557  | 1,43051703   | 0,144515526 |  |
| 201067_at    | PSMC2           | 2,190100188  | 2,045615873  | 0,144484315 |  |
| 204601_at    | N4BP1           | 2,190100188  | 2,045615873  | 0,144484315 |  |
| 225400_at    | TSEN15          | 2,303618506  | 2,159161028  | 0,144457478 |  |
| 225463_x_at  | GPR89A /// GPR  | 3,541801785  | 3,39737216   | 0,144429625 |  |
| 201849_at    | BNIP3           | 4,87068766   | 4,726262343  | 0,144425317 |  |
| 219477_s_at  | MRPS31P3 /// TH | 1,706348269  | 1,562009954  | 0,144338315 |  |
| 1552903_at   | B4GALNT2        | -1,470833215 | -1,615132408 | 0,144299192 |  |
| 1556327_a_at | -               | -1,470833215 | -1,615132408 | 0,144299192 |  |
| 1561714_a_at | B3GALNT2        | -1,470833215 | -1,615132408 | 0,144299192 |  |
| 1563119_at   | HP09025         | -1,470833215 | -1,615132408 | 0,144299192 |  |
| 1569676_at   | TOR1AIP2        | -1,470833215 | -1,615132408 | 0,144299192 |  |
| 227842_at    | RAB30           | -1,470833215 | -1,615132408 | 0,144299192 |  |
| 227899_at    | VIT             | -1,470833215 | -1,615132408 | 0,144299192 |  |
| 228921_at    | SLC25A42        | -1,470833215 | -1,615132408 | 0,144299192 |  |
| 231739_at    | LOC100507547 /  | -1,470833215 | -1,615132408 | 0,144299192 |  |
| 233804_at    | LOC440131       | -1,470833215 | -1,615132408 | 0,144299192 |  |
| 233863_at    | CASZ1           | -1,470833215 | -1,615132408 | 0,144299192 |  |
| 234051_at    | -               | -1,470833215 | -1,615132408 | 0,144299192 |  |
| 237389_at    | -               | -1,470833215 | -1,615132408 | 0,144299192 |  |
| 240942_at    | MPHOSPH8        | -1,470833215 | -1,615132408 | 0,144299192 |  |
| 241196_at    | -               | -1,470833215 | -1,615132408 | 0,144299192 |  |
| 243167_at    | ABCB5           | -1,470833215 | -1,615132408 | 0,144299192 |  |
| 244424_at    | LOC439938       | -1,470833215 | -1,615132408 | 0,144299192 |  |
| 211675_s_at  | MDFIC           | 3,372081975  | 3,227795991  | 0,144285984 |  |
| 219086_at    | ZNF839          | 0,57782909   | 0,433557298  | 0,144271792 |  |
| 209716_at    | CSF1            | 0,747935635  | 0,603679647  | 0,144255989 |  |
| 203718_at    | PNPLA6          | 0,900083947  | 0,755840599  | 0,144243348 |  |
| 1552701_a_at | CARD16          | -2,359436556 | -2,503677622 | 0,144241066 |  |
| 1554643_at   | RGS11           | -2,359436556 | -2,503677622 | 0,144241066 |  |
| 205386_s_at  | MDM2            | -2,359436556 | -2,503677622 | 0,144241066 |  |
| 210426_x_at  | RORA            | -2,359436556 | -2,503677622 | 0,144241066 |  |
| 216786_at    | FAM224A         | -2,359436556 | -2,503677622 | 0,144241066 |  |
| 228850_s_at  | SLIT2           | -2,359436556 | -2,503677622 | 0,144241066 |  |
| 230372_at    | HAS2            | -2,359436556 | -2,503677622 | 0,144241066 |  |
| 232260_at    | LOC100009676    | -2,359436556 | -2,503677622 | 0,144241066 |  |
| 234098_at    | SOBP            | -2,359436556 | -2,503677622 | 0,144241066 |  |
| 237734_s_at  | LOC100506907    | -2,359436556 | -2,503677622 | 0,144241066 |  |

|              |                 |              |              |             |  |
|--------------|-----------------|--------------|--------------|-------------|--|
| 240693_at    | -               | -2,359436556 | -2,503677622 | 0,144241066 |  |
| 243711_at    | DDAH1           | -2,359436556 | -2,503677622 | 0,144241066 |  |
| 1554794_a_at | UBE3C           | 1,037706275  | 0,893473268  | 0,144233007 |  |
| 219284_at    | HSPBAP1         | 1,037706275  | 0,893473268  | 0,144233007 |  |
| 212269_s_at  | MCM3AP          | 5,299405017  | 5,155174723  | 0,144230294 |  |
| 209123_at    | QDPR            | 4,600841383  | 4,456625687  | 0,144215696 |  |
| 227521_at    | FBXO33          | 3,164152611  | 3,019999252  | 0,144153359 |  |
| 213083_at    | SLC35D2         | 2,72965419   | 2,585563171  | 0,144091019 |  |
| 218290_at    | PLEKHJ1         | 2,72965419   | 2,585563171  | 0,144091019 |  |
| 215307_at    | ZNF529          | 3,709382903  | 3,565308644  | 0,144074259 |  |
| 203097_s_at  | RAPGEF2         | 4,354920338  | 4,210848982  | 0,144071357 |  |
| 203156_at    | AKAP11          | 2,938102794  | 2,794067719  | 0,144035075 |  |
| 225767_at    | RN45S           | 3,523171367  | 3,379145507  | 0,14402586  |  |
| 235117_at    | CHAC2           | 3,523171367  | 3,379145507  | 0,14402586  |  |
| 236240_at    | C4orf29         | 1,224581536  | 1,080561626  | 0,14401991  |  |
| 229664_at    | MAPK8           | 1,104397092  | 0,960386719  | 0,144010373 |  |
| 201498_at    | USP7            | 4,181024227  | 4,037037849  | 0,143986378 |  |
| 232814_x_at  | APOPT1          | 3,166555554  | 3,022611001  | 0,143944554 |  |
| 238122_at    | RBM12B          | 1,751865623  | 1,60795124   | 0,143914383 |  |
| 225047_at    | NUPL1           | 2,626954721  | 2,483094137  | 0,143860585 |  |
| 202958_at    | PTPN9           | 1,390002893  | 1,246149888  | 0,143853005 |  |
| 209600_s_at  | ACOX1           | 2,536956583  | 2,39311332   | 0,143843264 |  |
| 1568286_at   | HMGA2           | -3,41365796  | -3,557342128 | 0,143684168 |  |
| 200598_s_at  | HSP90B1 /// MIR | 4,9941977    | 4,850531814  | 0,143665886 |  |
| 225673_at    | MYADM           | 6,102518102  | 5,958855849  | 0,143662253 |  |
| 1557667_at   | -               | -0,423248115 | -0,566887459 | 0,143639344 |  |
| 1560553_at   | TIAF1           | -0,423248115 | -0,566887459 | 0,143639344 |  |
| 224008_s_at  | KCNK7           | -0,423248115 | -0,566887459 | 0,143639344 |  |
| 227206_at    | NDUFA10         | -0,423248115 | -0,566887459 | 0,143639344 |  |
| 239499_at    | DNAH2           | -0,423248115 | -0,566887459 | 0,143639344 |  |
| 240310_at    | -               | -0,423248115 | -0,566887459 | 0,143639344 |  |
| 242987_x_at  | LOC100506553    | -0,423248115 | -0,566887459 | 0,143639344 |  |
| 201699_at    | PSMC6           | 5,562860257  | 5,419261348  | 0,143598909 |  |
| 1570026_at   | CPXM2           | 0,171847695  | 0,028364014  | 0,143483681 |  |
| 217035_at    | SKAP2           | 0,171847695  | 0,028364014  | 0,143483681 |  |
| 221701_s_at  | STRA6           | 0,171847695  | 0,028364014  | 0,143483681 |  |
| 230202_at    | RELA            | 0,171847695  | 0,028364014  | 0,143483681 |  |
| 237518_at    | -               | 0,171847695  | 0,028364014  | 0,143483681 |  |
| 242739_at    | -               | 0,171847695  | 0,028364014  | 0,143483681 |  |
| 244622_at    | BRWD1           | 0,171847695  | 0,028364014  | 0,143483681 |  |
| 213528_at    | METTL18         | 1,90937145   | 1,765933685  | 0,143437765 |  |
| 202095_s_at  | BIRC5           | 4,451686997  | 4,308254202  | 0,143432795 |  |
| 203602_s_at  | ZBTB17          | 1,542099044  | 1,398700978  | 0,143398066 |  |
| 212117_at    | RHOQ            | 3,032022986  | 2,888726553  | 0,143296432 |  |
| 218995_s_at  | EDN1            | 0,496120222  | 0,352836757  | 0,143283465 |  |
| 243022_at    | -               | 0,496120222  | 0,352836757  | 0,143283465 |  |
| 206323_x_at  | OPHN1           | 4,750498305  | 4,607335387  | 0,143162918 |  |
| 230875_s_at  | ATP11A          | 3,176127502  | 3,033010968  | 0,143116534 |  |
| 222551_s_at  | C8orf33         | 3,359534664  | 3,216434104  | 0,14310056  |  |
| 203418_at    | CCNA2           | 4,198742362  | 4,05564712   | 0,143095242 |  |
| 214182_at    | -               | 3,191547726  | 3,048471686  | 0,14307604  |  |
| 201334_s_at  | ARHGEF12        | 4,726676749  | 4,583653734  | 0,143023015 |  |
| 224899_s_at  | MAGT1           | 4,674447146  | 4,531428237  | 0,143018909 |  |
| 203261_at    | DCTN6           | 4,767615283  | 4,624630085  | 0,142985199 |  |
| 218090_s_at  | WDR11           | 3,052955227  | 2,910041809  | 0,142913418 |  |
| 202467_s_at  | COPS2           | 5,735044187  | 5,592190191  | 0,142853996 |  |

|              |                 |              |              |             |  |
|--------------|-----------------|--------------|--------------|-------------|--|
| 228590_at    | PTCD3           | 2,571820446  | 2,428994491  | 0,142825955 |  |
| 218555_at    | ANAPC2          | 1,40228911   | 1,259496994  | 0,142792115 |  |
| 225986_x_at  | CPSF2           | 3,102740237  | 2,959949103  | 0,142791134 |  |
| 209876_at    | GIT2            | 1,119359127  | 0,976641161  | 0,142717966 |  |
| 216316_x_at  | -               | 1,119359127  | 0,976641161  | 0,142717966 |  |
| 202308_at    | SREBF1          | 1,296557217  | 1,153866761  | 0,142690456 |  |
| 213468_at    | ERCC2           | 1,296557217  | 1,153866761  | 0,142690456 |  |
| 223090_x_at  | VEZT            | 3,088871381  | 2,946258252  | 0,142613129 |  |
| 202330_s_at  | UNG             | 4,112884557  | 3,970285709  | 0,142598847 |  |
| 1557274_at   | LOC100506494    | -0,622910612 | -0,765504029 | 0,142593417 |  |
| 205093_at    | PLEKHA6         | -0,622910612 | -0,765504029 | 0,142593417 |  |
| 211197_s_at  | ICOSLG          | -0,622910612 | -0,765504029 | 0,142593417 |  |
| 233135_at    | LOC100506527    | -0,622910612 | -0,765504029 | 0,142593417 |  |
| 237646_x_at  | PLEKHG5         | -0,622910612 | -0,765504029 | 0,142593417 |  |
| 204479_at    | OSTF1           | 2,325288363  | 2,182705233  | 0,14258313  |  |
| 212731_at    | ANKRD46         | 3,467741468  | 3,325159096  | 0,142582372 |  |
| 1553140_at   | PELO            | -2,43257096  | -2,575129729 | 0,142558769 |  |
| 1554766_s_at | -               | -2,43257096  | -2,575129729 | 0,142558769 |  |
| 1555220_a_at | AKR1E2          | -2,43257096  | -2,575129729 | 0,142558769 |  |
| 1556323_at   | CELF2           | -2,43257096  | -2,575129729 | 0,142558769 |  |
| 1559413_at   | TCP11L2         | -2,43257096  | -2,575129729 | 0,142558769 |  |
| 1560246_at   | -               | -2,43257096  | -2,575129729 | 0,142558769 |  |
| 1561577_at   | -               | -2,43257096  | -2,575129729 | 0,142558769 |  |
| 1564022_at   | ZNF804B         | -2,43257096  | -2,575129729 | 0,142558769 |  |
| 1564676_a_at | -               | -2,43257096  | -2,575129729 | 0,142558769 |  |
| 1565242_at   | TNXB            | -2,43257096  | -2,575129729 | 0,142558769 |  |
| 1568921_at   | -               | -2,43257096  | -2,575129729 | 0,142558769 |  |
| 1570474_s_at | LOC338579       | -2,43257096  | -2,575129729 | 0,142558769 |  |
| 201842_s_at  | EFEMP1          | -2,43257096  | -2,575129729 | 0,142558769 |  |
| 206425_s_at  | TRPC3           | -2,43257096  | -2,575129729 | 0,142558769 |  |
| 210016_at    | MYT1L           | -2,43257096  | -2,575129729 | 0,142558769 |  |
| 210479_s_at  | RORA            | -2,43257096  | -2,575129729 | 0,142558769 |  |
| 210712_at    | LDHAL6B         | -2,43257096  | -2,575129729 | 0,142558769 |  |
| 213537_at    | HLA-DPA1        | -2,43257096  | -2,575129729 | 0,142558769 |  |
| 215422_at    | -               | -2,43257096  | -2,575129729 | 0,142558769 |  |
| 217093_at    | RNASE1          | -2,43257096  | -2,575129729 | 0,142558769 |  |
| 220030_at    | STYK1           | -2,43257096  | -2,575129729 | 0,142558769 |  |
| 221363_x_at  | GPR25           | -2,43257096  | -2,575129729 | 0,142558769 |  |
| 223643_at    | CRYGS           | -2,43257096  | -2,575129729 | 0,142558769 |  |
| 224426_s_at  | ACTR3BP2 /// AC | -2,43257096  | -2,575129729 | 0,142558769 |  |
| 231242_at    | BHLHE41         | -2,43257096  | -2,575129729 | 0,142558769 |  |
| 231668_x_at  | IGHG1           | -2,43257096  | -2,575129729 | 0,142558769 |  |
| 232791_at    | -               | -2,43257096  | -2,575129729 | 0,142558769 |  |
| 234245_at    | -               | -2,43257096  | -2,575129729 | 0,142558769 |  |
| 237676_at    | -               | -2,43257096  | -2,575129729 | 0,142558769 |  |
| 237980_at    | LINC00347       | -2,43257096  | -2,575129729 | 0,142558769 |  |
| 238313_at    | -               | -2,43257096  | -2,575129729 | 0,142558769 |  |
| 238576_at    | MOCOS           | -2,43257096  | -2,575129729 | 0,142558769 |  |
| 241279_at    | -               | -2,43257096  | -2,575129729 | 0,142558769 |  |
| 243729_at    | -               | -2,43257096  | -2,575129729 | 0,142558769 |  |
| 243876_at    | -               | -2,43257096  | -2,575129729 | 0,142558769 |  |
| 212675_s_at  | CEP68           | 2,768138014  | 2,625627364  | 0,14251065  |  |
| 212734_x_at  | RPL13 /// SNOR  | 7,509180604  | 7,366697803  | 0,142482801 |  |
| 214435_x_at  | RALA            | 3,920575295  | 3,778101865  | 0,14247343  |  |
| 224913_s_at  | TIMM50          | 5,881739849  | 5,739266787  | 0,142473062 |  |
| 214221_at    | ALMS1           | 2,122398022  | 1,979940779  | 0,142457244 |  |



|              |                |              |              |             |  |
|--------------|----------------|--------------|--------------|-------------|--|
| 1555286_at   | CDKL1          | -1,399512875 | -1,541908042 | 0,142395167 |  |
| 1570084_at   | -              | -1,399512875 | -1,541908042 | 0,142395167 |  |
| 1570252_at   | -              | -1,399512875 | -1,541908042 | 0,142395167 |  |
| 208341_x_at  | CSH2           | -1,399512875 | -1,541908042 | 0,142395167 |  |
| 209569_x_at  | D4S234E        | -1,399512875 | -1,541908042 | 0,142395167 |  |
| 220425_x_at  | ROPN1B         | -1,399512875 | -1,541908042 | 0,142395167 |  |
| 220532_s_at  | TMEM176B       | -1,399512875 | -1,541908042 | 0,142395167 |  |
| 228102_at    | -              | -1,399512875 | -1,541908042 | 0,142395167 |  |
| 228206_at    | HS3ST4         | -1,399512875 | -1,541908042 | 0,142395167 |  |
| 229046_s_at  | PLEKHB1        | -1,399512875 | -1,541908042 | 0,142395167 |  |
| 230828_at    | GRAMD2         | -1,399512875 | -1,541908042 | 0,142395167 |  |
| 232244_at    | KIAA1161       | -1,399512875 | -1,541908042 | 0,142395167 |  |
| 232704_s_at  | LRRFIP2        | -1,399512875 | -1,541908042 | 0,142395167 |  |
| 236928_at    | -              | -1,399512875 | -1,541908042 | 0,142395167 |  |
| 238243_at    | -              | -1,399512875 | -1,541908042 | 0,142395167 |  |
| 240944_at    | -              | -1,399512875 | -1,541908042 | 0,142395167 |  |
| 243292_at    | FAM132A        | -1,399512875 | -1,541908042 | 0,142395167 |  |
| 244049_at    | -              | -1,399512875 | -1,541908042 | 0,142395167 |  |
| 244319_at    | -              | -1,399512875 | -1,541908042 | 0,142395167 |  |
| 1555897_at   | -              | -0,078265071 | -0,220592223 | 0,142327152 |  |
| 227055_at    | METTL7B        | -0,078265071 | -0,220592223 | 0,142327152 |  |
| 233795_at    | ODF3           | -0,078265071 | -0,220592223 | 0,142327152 |  |
| 237109_at    | TOM1L2         | -0,078265071 | -0,220592223 | 0,142327152 |  |
| 241978_at    | -              | -0,078265071 | -0,220592223 | 0,142327152 |  |
| 242545_at    | TTLL11         | -0,078265071 | -0,220592223 | 0,142327152 |  |
| 222550_at    | ARMC1          | 4,810884483  | 4,668649411  | 0,142235072 |  |
| 43934_at     | GPR137         | 1,156099112  | 1,013870809  | 0,142228303 |  |
| 200751_s_at  | HNRNPC /// LOC | 6,528153377  | 6,386081529  | 0,142071848 |  |
| 214895_s_at  | ADAM10         | 1,247462054  | 1,105412836  | 0,142049218 |  |
| 200867_at    | RNF114         | 3,372081975  | 3,23005767   | 0,142024305 |  |
| 224598_at    | MGAT4B         | 5,055446416  | 4,913450933  | 0,141995483 |  |
| 1555106_a_at | CTDSPL2        | 1,063722698  | 0,921731975  | 0,141990722 |  |
| 204633_s_at  | RPS6KA5        | 1,512180019  | 1,370274469  | 0,14190555  |  |
| 213150_at    | HOXA10         | 1,129248302  | 0,987376598  | 0,141871704 |  |
| 205452_at    | PIGB           | 2,220484971  | 2,078620836  | 0,141864135 |  |
| 202561_at    | TNKS           | 2,438982012  | 2,297144887  | 0,141837125 |  |
| 227151_at    | SNX33          | 1,560488174  | 1,418668082  | 0,141820092 |  |
| 205251_at    | PER2           | 2,361396186  | 2,21959457   | 0,141801616 |  |
| 217294_s_at  | ENO1           | 6,854913809  | 6,71315288   | 0,141760929 |  |
| 204730_at    | RIMS3          | 1,414471577  | 1,272721751  | 0,141749827 |  |
| 228988_at    | ZNF711         | 4,177454337  | 4,035745559  | 0,141708778 |  |
| 221932_s_at  | GLRX5          | 6,224151084  | 6,082442605  | 0,141708479 |  |
| 202173_s_at  | VEZF1          | 0,695652136  | 0,553993624  | 0,141658512 |  |
| 213561_at    | MCM9           | 0,695652136  | 0,553993624  | 0,141658512 |  |
| 224448_s_at  | MNF1           | 4,571901478  | 4,430312399  | 0,14158908  |  |
| 217965_s_at  | SAP30BP        | 3,01878441   | 2,877228323  | 0,141556087 |  |
| 226538_at    | MAN2A1         | 3,563845287  | 3,42231092   | 0,141534367 |  |
| 209530_at    | CACNB3         | 0,779676066  | 0,638150376  | 0,141525689 |  |
| 1558474_at   | -              | -2,479842156 | -2,621331989 | 0,141489833 |  |
| 1559259_at   | -              | -2,479842156 | -2,621331989 | 0,141489833 |  |
| 1559450_at   | -              | -2,479842156 | -2,621331989 | 0,141489833 |  |
| 1560317_s_at | HIP1           | -2,479842156 | -2,621331989 | 0,141489833 |  |
| 1561877_at   | -              | -2,479842156 | -2,621331989 | 0,141489833 |  |
| 1562275_at   | -              | -2,479842156 | -2,621331989 | 0,141489833 |  |
| 1562591_a_at | OFCC1          | -2,479842156 | -2,621331989 | 0,141489833 |  |
| 1564970_at   | SETDB2         | -2,479842156 | -2,621331989 | 0,141489833 |  |

|              |                   |              |              |             |  |
|--------------|-------------------|--------------|--------------|-------------|--|
| 1568612_at   | GABRG2            | -2,479842156 | -2,621331989 | 0,141489833 |  |
| 1569257_at   | FMNL1             | -2,479842156 | -2,621331989 | 0,141489833 |  |
| 205816_at    | ITGB8             | -2,479842156 | -2,621331989 | 0,141489833 |  |
| 206239_s_at  | SPINK1            | -2,479842156 | -2,621331989 | 0,141489833 |  |
| 216558_x_at  | IGHA1 /// IGHD // | -2,479842156 | -2,621331989 | 0,141489833 |  |
| 216989_at    | SPAM1             | -2,479842156 | -2,621331989 | 0,141489833 |  |
| 220880_at    | -                 | -2,479842156 | -2,621331989 | 0,141489833 |  |
| 221089_at    | NOX3              | -2,479842156 | -2,621331989 | 0,141489833 |  |
| 225540_at    | MAP2              | -2,479842156 | -2,621331989 | 0,141489833 |  |
| 233621_s_at  | ARHGEF12          | -2,479842156 | -2,621331989 | 0,141489833 |  |
| 234281_at    | ESPN /// ESPNP    | -2,479842156 | -2,621331989 | 0,141489833 |  |
| 234629_at    | -                 | -2,479842156 | -2,621331989 | 0,141489833 |  |
| 236439_at    | -                 | -2,479842156 | -2,621331989 | 0,141489833 |  |
| 239539_at    | -                 | -2,479842156 | -2,621331989 | 0,141489833 |  |
| 240850_at    | -                 | -2,479842156 | -2,621331989 | 0,141489833 |  |
| 242309_at    | -                 | -2,479842156 | -2,621331989 | 0,141489833 |  |
| 243483_at    | TRPM8             | -2,479842156 | -2,621331989 | 0,141489833 |  |
| 244761_at    | C5orf63           | -2,479842156 | -2,621331989 | 0,141489833 |  |
| 201930_at    | MCM6              | 5,55003372   | 5,408567805  | 0,141465915 |  |
| 217955_at    | BCL2L13           | 1,968405881  | 1,826973888  | 0,141431993 |  |
| 1553113_s_at | CDK8              | 3,431234921  | 3,289820089  | 0,141414832 |  |
| 228099_at    | ZNF550            | 2,166283906  | 2,024923328  | 0,141360578 |  |
| 1565254_s_at | ELL               | -0,394749123 | -0,536087151 | 0,141338027 |  |
| 207982_at    | HIST1H1T          | -0,394749123 | -0,536087151 | 0,141338027 |  |
| 217212_s_at  | IL9R              | -0,394749123 | -0,536087151 | 0,141338027 |  |
| 222595_s_at  | DIDO1             | -0,394749123 | -0,536087151 | 0,141338027 |  |
| 228814_at    | RBBP6             | -0,394749123 | -0,536087151 | 0,141338027 |  |
| 230293_at    | -                 | -0,394749123 | -0,536087151 | 0,141338027 |  |
| 232735_at    | ANKRD34A          | -0,394749123 | -0,536087151 | 0,141338027 |  |
| 237659_at    | FLJ40288          | -0,394749123 | -0,536087151 | 0,141338027 |  |
| 202585_s_at  | NFX1              | 0,518867317  | 0,377530647  | 0,14133667  |  |
| 212205_at    | H2AFV             | 5,515811234  | 5,374726101  | 0,141085133 |  |
| 1554386_at   | CST9              | -1,353583928 | -1,494668682 | 0,141084754 |  |
| 1556938_a_at | -                 | -1,353583928 | -1,494668682 | 0,141084754 |  |
| 1559680_at   | TTL               | -1,353583928 | -1,494668682 | 0,141084754 |  |
| 1560378_at   | GRIK1-AS2         | -1,353583928 | -1,494668682 | 0,141084754 |  |
| 1569188_s_at | -                 | -1,353583928 | -1,494668682 | 0,141084754 |  |
| 206636_at    | RASA2             | -1,353583928 | -1,494668682 | 0,141084754 |  |
| 208425_s_at  | TANC2             | -1,353583928 | -1,494668682 | 0,141084754 |  |
| 211633_x_at  | -                 | -1,353583928 | -1,494668682 | 0,141084754 |  |
| 215550_at    | SRGAP3            | -1,353583928 | -1,494668682 | 0,141084754 |  |
| 222434_at    | ENAH              | -1,353583928 | -1,494668682 | 0,141084754 |  |
| 222802_at    | EDN1              | -1,353583928 | -1,494668682 | 0,141084754 |  |
| 223232_s_at  | CGN               | -1,353583928 | -1,494668682 | 0,141084754 |  |
| 224487_at    | -                 | -1,353583928 | -1,494668682 | 0,141084754 |  |
| 226086_at    | SYT13             | -1,353583928 | -1,494668682 | 0,141084754 |  |
| 231111_at    | -                 | -1,353583928 | -1,494668682 | 0,141084754 |  |
| 231510_at    | -                 | -1,353583928 | -1,494668682 | 0,141084754 |  |
| 235631_at    | DDR2              | -1,353583928 | -1,494668682 | 0,141084754 |  |
| 236315_at    | -                 | -1,353583928 | -1,494668682 | 0,141084754 |  |
| 237601_at    | LOC100507277      | -1,353583928 | -1,494668682 | 0,141084754 |  |
| 240518_at    | LOC729291         | -1,353583928 | -1,494668682 | 0,141084754 |  |
| 243245_at    | LOC100506446      | -1,353583928 | -1,494668682 | 0,141084754 |  |
| 218128_at    | NFYB              | 1,659347917  | 1,518263577  | 0,14108434  |  |
| 230411_at    | UBE2V2            | 1,422536444  | 1,281471383  | 0,141065061 |  |
| 1553990_at   | C16orf79          | 0,20027154   | 0,059218869  | 0,141052671 |  |

|              |                 |              |              |             |  |
|--------------|-----------------|--------------|--------------|-------------|--|
| 238948_at    | TM9SF1          | 0,20027154   | 0,059218869  | 0,141052671 |  |
| 203028_s_at  | CYBA            | 5,672171472  | 5,531136224  | 0,141035248 |  |
| 211758_x_at  | TXNDC9          | 4,163687338  | 4,022758595  | 0,140928743 |  |
| 223525_at    | DLL4            | 0,317354302  | 0,176436073  | 0,140918229 |  |
| 227883_at    | CCDC71L         | 0,317354302  | 0,176436073  | 0,140918229 |  |
| 200050_at    | ZNF146          | 6,681991566  | 6,541101365  | 0,140890202 |  |
| 222402_at    | POMP            | 3,232262672  | 3,091398163  | 0,140864509 |  |
| 221011_s_at  | LBH             | 3,930506493  | 3,789647959  | 0,140858534 |  |
| 219522_at    | FJX1            | 2,846658948  | 2,705818724  | 0,140840224 |  |
| 33132_at     | CPSF1 /// MIR12 | 3,908064381  | 3,767241497  | 0,140822883 |  |
| 205548_s_at  | BTG3            | 3,319065909  | 3,178292062  | 0,140773847 |  |
| 203269_at    | NSMAF           | 5,281225703  | 5,140521187  | 0,140704516 |  |
| 229766_at    | ZNF445          | 1,789769151  | 1,64909809   | 0,140671061 |  |
| 218228_s_at  | TNKS2           | 4,453164021  | 4,312529215  | 0,140634806 |  |
| 203847_s_at  | AKAP8           | 2,708372067  | 2,567790814  | 0,140581253 |  |
| 228370_at    | LOC100506948 /  | 1,666156729  | 1,525647381  | 0,140509348 |  |
| 1552865_a_at | IFLTD1          | -0,055687482 | -0,19610998  | 0,140422498 |  |
| 237293_at    | -               | -0,055687482 | -0,19610998  | 0,140422498 |  |
| 208835_s_at  | LUC7L3          | 4,138815532  | 3,9984201    | 0,140395432 |  |
| 212957_s_at  | LOC92249        | 0,945567441  | 0,805216064  | 0,140351377 |  |
| 219392_x_at  | PRR11           | 4,281994342  | 4,141655035  | 0,140339307 |  |
| 211105_s_at  | NFATC1          | 1,530951994  | 1,390636111  | 0,140315883 |  |
| 224941_at    | PAPPA           | 1,530951994  | 1,390636111  | 0,140315883 |  |
| 213828_x_at  | H3F3A /// H3F3A | 7,213893795  | 7,073593152  | 0,140300643 |  |
| 1561329_s_at | RPUSD3          | -0,59053611  | -0,730778808 | 0,140242698 |  |
| 209603_at    | GATA3           | -0,59053611  | -0,730778808 | 0,140242698 |  |
| 211230_s_at  | PIK3CD          | -0,59053611  | -0,730778808 | 0,140242698 |  |
| 215999_at    | CDRT1           | -0,59053611  | -0,730778808 | 0,140242698 |  |
| 232290_at    | -               | -0,59053611  | -0,730778808 | 0,140242698 |  |
| 235582_at    | E2F2            | -0,59053611  | -0,730778808 | 0,140242698 |  |
| 238602_at    | DIS3L2          | -0,59053611  | -0,730778808 | 0,140242698 |  |
| 239335_at    | ZNF710          | -0,59053611  | -0,730778808 | 0,140242698 |  |
| 241187_at    | -               | -0,59053611  | -0,730778808 | 0,140242698 |  |
| 1568678_s_at | FGFR1OP         | 3,824937847  | 3,684723168  | 0,140214679 |  |
| 201655_s_at  | HSPG2           | 3,284083774  | 3,14392006   | 0,140163714 |  |
| 1552800_at   | ABHD11          | 1,269985355  | 1,129843209  | 0,140142146 |  |
| 201584_s_at  | DDX39A          | 6,735572926  | 6,595453115  | 0,140119811 |  |
| 210054_at    | HAUS3           | 2,796341835  | 2,656223838  | 0,140117997 |  |
| 202294_at    | STAG1           | 1,874520207  | 1,73441697   | 0,140103236 |  |
| 221813_at    | FBXO42          | 1,874520207  | 1,73441697   | 0,140103236 |  |
| 218402_s_at  | HPS4            | 2,2992452    | 2,159161028  | 0,140084173 |  |
| 217560_at    | GGA1            | 0,533835206  | 0,393761504  | 0,140073702 |  |
| 239013_at    | SEC22C          | 0,533835206  | 0,393761504  | 0,140073702 |  |
| 213407_at    | PHLPP2          | 1,434549838  | 1,294497133  | 0,140052705 |  |
| 209005_at    | FBXL5           | 0,798390451  | 0,658444279  | 0,139946172 |  |
| 233779_x_at  | -               | 0,798390451  | 0,658444279  | 0,139946172 |  |
| 221890_at    | ZNF335          | 1,799091453  | 1,659204017  | 0,139887437 |  |
| 223307_at    | CDCA3           | 3,769107843  | 3,629253073  | 0,13985477  |  |
| 229845_at    | MAPKAP1         | 1,951783949  | 1,811954245  | 0,139829704 |  |
| 222610_s_at  | S100PBP         | 1,153678675  | 1,013870809  | 0,139807866 |  |
| 209143_s_at  | CLNS1A          | 5,256342713  | 5,116578126  | 0,139764586 |  |
| 205437_at    | ZNF211          | 3,18563636   | 3,045906378  | 0,139729981 |  |
| 223231_at    | TATDN1          | 4,482873466  | 4,343149918  | 0,139723548 |  |
| 202930_s_at  | SUCLA2          | 4,633995388  | 4,494276519  | 0,139718868 |  |
| 201456_s_at  | BUB3            | 3,69780007   | 3,558125564  | 0,139674506 |  |
| 1561143_at   | -               | -2,551294263 | -2,690860744 | 0,139566481 |  |

|              |                 |              |              |             |  |
|--------------|-----------------|--------------|--------------|-------------|--|
| 1561261_at   | -               | -2,551294263 | -2,690860744 | 0,139566481 |  |
| 1562386_s_at | ZNF501          | -2,551294263 | -2,690860744 | 0,139566481 |  |
| 1565804_at   | -               | -2,551294263 | -2,690860744 | 0,139566481 |  |
| 1565895_at   | -               | -2,551294263 | -2,690860744 | 0,139566481 |  |
| 1565976_at   | -               | -2,551294263 | -2,690860744 | 0,139566481 |  |
| 1570101_at   | -               | -2,551294263 | -2,690860744 | 0,139566481 |  |
| 1570316_at   | -               | -2,551294263 | -2,690860744 | 0,139566481 |  |
| 1570484_at   | -               | -2,551294263 | -2,690860744 | 0,139566481 |  |
| 206535_at    | SLC2A2          | -2,551294263 | -2,690860744 | 0,139566481 |  |
| 223869_at    | SOST            | -2,551294263 | -2,690860744 | 0,139566481 |  |
| 228377_at    | KLHL14          | -2,551294263 | -2,690860744 | 0,139566481 |  |
| 232202_at    | -               | -2,551294263 | -2,690860744 | 0,139566481 |  |
| 233379_at    | PRR5L           | -2,551294263 | -2,690860744 | 0,139566481 |  |
| 235335_at    | ABCA9           | -2,551294263 | -2,690860744 | 0,139566481 |  |
| 240489_at    | -               | -2,551294263 | -2,690860744 | 0,139566481 |  |
| 242901_at    | -               | -2,551294263 | -2,690860744 | 0,139566481 |  |
| 244188_at    | -               | -2,551294263 | -2,690860744 | 0,139566481 |  |
| 212343_at    | YIPF6           | 2,305800198  | 2,166264721  | 0,139535476 |  |
| 229234_at    | ZC3H12B         | 0,95671774   | 0,817300337  | 0,139417403 |  |
| 219703_at    | MNS1            | 1,805273023  | 1,665902186  | 0,139370838 |  |
| 227295_at    | IKBIP           | 1,883312263  | 1,743944487  | 0,139367776 |  |
| 222118_at    | CENPN           | 2,061726373  | 1,922365006  | 0,139361367 |  |
| 222690_s_at  | TMEM39A         | 2,061726373  | 1,922365006  | 0,139361367 |  |
| 202961_s_at  | ATP5J2          | 6,76153603   | 6,622229752  | 0,139306278 |  |
| 209448_at    | HTATIP2         | 2,365585359  | 2,226407528  | 0,139177831 |  |
| 225655_at    | UHRF1           | 5,038819589  | 4,899664665  | 0,139154924 |  |
| 200092_s_at  | RPL37           | 7,924324991  | 7,785179709  | 0,139145282 |  |
| 216323_x_at  | TUBA3C /// TUBA | 1,496984567  | 1,3579181    | 0,139066467 |  |
| 235711_at    | PURB            | 1,496984567  | 1,3579181    | 0,139066467 |  |
| 209771_x_at  | CD24            | 1,283332461  | 1,144305291  | 0,13902717  |  |
| 209284_s_at  | FAM208A         | 2,790121796  | 2,651169275  | 0,13895252  |  |
| 214716_at    | BMP2K           | 2,132266459  | 1,993317152  | 0,138949307 |  |
| 203487_s_at  | ARMC8           | 2,640847372  | 2,501934108  | 0,138913264 |  |
| 208749_x_at  | FLOT1           | 3,663333942  | 3,524430539  | 0,138903403 |  |
| 204531_s_at  | BRCA1           | 3,285189903  | 3,146317015  | 0,138872889 |  |
| 1553395_a_at | CD200R1         | -1,2845686   | -1,423348341 | 0,138779741 |  |
| 1564475_s_at | ZBED3-AS1       | -1,2845686   | -1,423348341 | 0,138779741 |  |
| 1565671_a_at | -               | -1,2845686   | -1,423348341 | 0,138779741 |  |
| 1565935_at   | C4orf21         | -1,2845686   | -1,423348341 | 0,138779741 |  |
| 1570239_a_at | CLNK            | -1,2845686   | -1,423348341 | 0,138779741 |  |
| 209401_s_at  | SLC12A4         | -1,2845686   | -1,423348341 | 0,138779741 |  |
| 211148_s_at  | ANGPT2          | -1,2845686   | -1,423348341 | 0,138779741 |  |
| 215591_at    | SATB2           | -1,2845686   | -1,423348341 | 0,138779741 |  |
| 216055_at    | PDGFB           | -1,2845686   | -1,423348341 | 0,138779741 |  |
| 224273_at    | C3orf20         | -1,2845686   | -1,423348341 | 0,138779741 |  |
| 234186_at    | -               | -1,2845686   | -1,423348341 | 0,138779741 |  |
| 238119_at    | -               | -1,2845686   | -1,423348341 | 0,138779741 |  |
| 241801_at    | PGAP1           | -1,2845686   | -1,423348341 | 0,138779741 |  |
| 242514_at    | -               | -1,2845686   | -1,423348341 | 0,138779741 |  |
| 244241_x_at  | -               | -1,2845686   | -1,423348341 | 0,138779741 |  |
| 221919_at    | HNRNPA1         | 2,197169074  | 2,058399602  | 0,138769473 |  |
| 226980_at    | DEPDC1B         | 3,751608593  | 3,6128809    | 0,138727693 |  |
| 212684_at    | ZNF3            | 2,069451339  | 1,930732138  | 0,138719201 |  |
| 230588_s_at  | LOC285074       | 2,501229299  | 2,362515214  | 0,138714086 |  |
| 217771_at    | GOLM1           | 3,069741844  | 2,93104672   | 0,138695125 |  |
| 200958_s_at  | SDCBP           | 5,939084132  | 5,800470711  | 0,138613421 |  |

|              |                 |              |              |             |  |
|--------------|-----------------|--------------|--------------|-------------|--|
| 221783_at    | WIZ             | 1,168140757  | 1,029536893  | 0,138603864 |  |
| 204160_s_at  | ENPP4           | 3,199783157  | 3,061230246  | 0,138552911 |  |
| 45828_at     | ATP5SL          | 3,913081773  | 3,77461994   | 0,138461833 |  |
| 224015_s_at  | MRPS25          | 1,454352496  | 1,315948728  | 0,138403768 |  |
| 220127_s_at  | FBXL12          | 3,401961598  | 3,263564154  | 0,138397444 |  |
| 218087_s_at  | SORBS1          | 1,139070151  | 1,000684521  | 0,13838563  |  |
| 221869_at    | ZNF512B         | 1,139070151  | 1,000684521  | 0,13838563  |  |
| 1553471_at   | SLC35G3         | -2,597496523 | -2,735862426 | 0,138365903 |  |
| 1554560_at   | PGM5            | -2,597496523 | -2,735862426 | 0,138365903 |  |
| 1555240_s_at | GNG12           | -2,597496523 | -2,735862426 | 0,138365903 |  |
| 1556541_s_at | -               | -2,597496523 | -2,735862426 | 0,138365903 |  |
| 1560373_a_at | -               | -2,597496523 | -2,735862426 | 0,138365903 |  |
| 1561700_at   | -               | -2,597496523 | -2,735862426 | 0,138365903 |  |
| 1563277_at   | -               | -2,597496523 | -2,735862426 | 0,138365903 |  |
| 208481_at    | ASB4            | -2,597496523 | -2,735862426 | 0,138365903 |  |
| 216669_at    | -               | -2,597496523 | -2,735862426 | 0,138365903 |  |
| 219823_at    | LIN28A          | -2,597496523 | -2,735862426 | 0,138365903 |  |
| 232721_at    | TRIM55          | -2,597496523 | -2,735862426 | 0,138365903 |  |
| 234227_at    | -               | -2,597496523 | -2,735862426 | 0,138365903 |  |
| 237961_at    | -               | -2,597496523 | -2,735862426 | 0,138365903 |  |
| 239460_at    | LOC100652954    | -2,597496523 | -2,735862426 | 0,138365903 |  |
| 240866_at    | -               | -2,597496523 | -2,735862426 | 0,138365903 |  |
| 241589_at    | -               | -2,597496523 | -2,735862426 | 0,138365903 |  |
| 243325_at    | -               | -2,597496523 | -2,735862426 | 0,138365903 |  |
| 244582_at    | -               | -2,597496523 | -2,735862426 | 0,138365903 |  |
| 224636_at    | ZFP91           | 4,065387235  | 3,927027853  | 0,138359382 |  |
| 217900_at    | IARS2           | 4,771961618  | 4,63362748   | 0,138334138 |  |
| 1560599_a_at | CEP89           | 1,735773781  | 1,59747851   | 0,138295271 |  |
| 221669_s_at  | ACAD8           | 1,735773781  | 1,59747851   | 0,138295271 |  |
| 223671_x_at  | DPH5            | 3,767525744  | 3,629253073  | 0,138272671 |  |
| 201139_s_at  | SSB             | 5,16074523   | 5,022506227  | 0,138239003 |  |
| 1556900_at   | LOC149773       | 0,555999837  | 0,417770464  | 0,138229373 |  |
| 218821_at    | NPEPL1 /// STX1 | 0,555999837  | 0,417770464  | 0,138229373 |  |
| 209781_s_at  | KHDRBS3         | 2,580856819  | 2,442710777  | 0,138146041 |  |
| 202956_at    | ARFGEF1         | 3,205636958  | 3,067567462  | 0,138069496 |  |
| 1555780_a_at | RHEB            | 5,13582221   | 4,997831652  | 0,137990558 |  |
| 1559922_at   | -               | -0,352951799 | -0,490927335 | 0,137975537 |  |
| 220584_at    | FLJ22184        | -0,352951799 | -0,490927335 | 0,137975537 |  |
| 221375_at    | OR1G1           | -0,352951799 | -0,490927335 | 0,137975537 |  |
| 225757_s_at  | CLMN            | -0,352951799 | -0,490927335 | 0,137975537 |  |
| 227529_s_at  | AKAP12          | -0,352951799 | -0,490927335 | 0,137975537 |  |
| 230582_at    | HECA            | -0,352951799 | -0,490927335 | 0,137975537 |  |
| 239821_at    | FLJ30064        | -0,352951799 | -0,490927335 | 0,137975537 |  |
| 223402_at    | DUSP23          | 4,128375743  | 3,990437532  | 0,137938212 |  |
| 209221_s_at  | OSBPL2          | 1,177702228  | 1,039887232  | 0,137814996 |  |
| 227701_at    | C10orf118       | 1,177702228  | 1,039887232  | 0,137814996 |  |
| 203921_at    | CHST2           | 2,536956583  | 2,39915583   | 0,137800753 |  |
| 213080_x_at  | RPL5 /// SNORD  | 7,861057199  | 7,72328437   | 0,13777283  |  |
| 220083_x_at  | UCHL5           | 2,327437554  | 2,189694216  | 0,137743338 |  |
| 217935_s_at  | UQCC            | 2,959046717  | 2,821324225  | 0,137722492 |  |
| 203192_at    | ABCB6           | -0,022466681 | -0,160136748 | 0,137670068 |  |
| 235584_at    | LOC285033       | -0,022466681 | -0,160136748 | 0,137670068 |  |
| 212607_at    | AKT3            | 2,082235068  | 1,944570415  | 0,137664653 |  |
| 200709_at    | FKBP1A          | 4,156452062  | 4,018839599  | 0,137612463 |  |
| 218095_s_at  | TMEM165         | 3,895444023  | 3,757867094  | 0,137576929 |  |
| 227558_at    | CBX4            | 2,905386372  | 2,767843855  | 0,137542517 |  |

|              |                |              |              |             |  |
|--------------|----------------|--------------|--------------|-------------|--|
| 206833_s_at  | ACYP2          | 2,272723257  | 2,135226207  | 0,13749705  |  |
| 221575_at    | SCLY           | 2,38635068   | 2,248887791  | 0,137462889 |  |
| 206809_s_at  | HNRNPA3 /// HN | 3,934741882  | 3,797294336  | 0,137447546 |  |
| 225522_at    | AAK1           | 2,182996494  | 2,045615873  | 0,137380621 |  |
| 239193_at    | FUBP3          | 0,359971644  | 0,222599095  | 0,137372549 |  |
| 235429_at    | EIF3E          | 1,567778694  | 1,43051703   | 0,137261664 |  |
| 1552546_a_at | LETM2          | -1,240169874 | -1,377419394 | 0,13724952  |  |
| 1552955_at   | LINC00208      | -1,240169874 | -1,377419394 | 0,13724952  |  |
| 1558995_at   | ZNF547         | -1,240169874 | -1,377419394 | 0,13724952  |  |
| 204803_s_at  | RRAD           | -1,240169874 | -1,377419394 | 0,13724952  |  |
| 210637_at    | TACR1          | -1,240169874 | -1,377419394 | 0,13724952  |  |
| 211130_x_at  | EDA            | -1,240169874 | -1,377419394 | 0,13724952  |  |
| 213948_x_at  | CADM3          | -1,240169874 | -1,377419394 | 0,13724952  |  |
| 215736_at    | KCNV1          | -1,240169874 | -1,377419394 | 0,13724952  |  |
| 216077_s_at  | L3MBTL1        | -1,240169874 | -1,377419394 | 0,13724952  |  |
| 229023_at    | SFT2D3         | -1,240169874 | -1,377419394 | 0,13724952  |  |
| 232829_at    | OR52K3P        | -1,240169874 | -1,377419394 | 0,13724952  |  |
| 234754_at    | SLC37A1        | -1,240169874 | -1,377419394 | 0,13724952  |  |
| 236717_at    | FAM179A        | -1,240169874 | -1,377419394 | 0,13724952  |  |
| 236767_at    | IQCF2          | -1,240169874 | -1,377419394 | 0,13724952  |  |
| 241149_at    | -              | -1,240169874 | -1,377419394 | 0,13724952  |  |
| 243489_at    | -              | -1,240169874 | -1,377419394 | 0,13724952  |  |
| 243741_at    | -              | -1,240169874 | -1,377419394 | 0,13724952  |  |
| 244171_at    | MKLN1          | -1,240169874 | -1,377419394 | 0,13724952  |  |
| 204125_at    | NDUFAF1        | 3,638448528  | 3,501209806  | 0,137238722 |  |
| 222508_s_at  | ARGLU1         | 1,305306849  | 1,16809119   | 0,137215659 |  |
| 228309_at    | -              | 1,305306849  | 1,16809119   | 0,137215659 |  |
| 214491_at    | SSTR3          | 0,246434561  | 0,109221392  | 0,137213169 |  |
| 241812_at    | SPATS2L        | 0,246434561  | 0,109221392  | 0,137213169 |  |
| 228977_at    | LOC729680      | 0,984222186  | 0,847075464  | 0,137146722 |  |
| 1552939_at   | ANGPT1         | -2,64318869  | -2,780313924 | 0,137125235 |  |
| 1553296_at   | GPR128         | -2,64318869  | -2,780313924 | 0,137125235 |  |
| 1555869_a_at | LOC100507477   | -2,64318869  | -2,780313924 | 0,137125235 |  |
| 1556623_at   | -              | -2,64318869  | -2,780313924 | 0,137125235 |  |
| 1557018_a_at | -              | -2,64318869  | -2,780313924 | 0,137125235 |  |
| 1557136_at   | ATP13A4        | -2,64318869  | -2,780313924 | 0,137125235 |  |
| 1561507_at   | FFAR1          | -2,64318869  | -2,780313924 | 0,137125235 |  |
| 1561584_at   | -              | -2,64318869  | -2,780313924 | 0,137125235 |  |
| 1564430_at   | -              | -2,64318869  | -2,780313924 | 0,137125235 |  |
| 1568638_a_at | IDO2           | -2,64318869  | -2,780313924 | 0,137125235 |  |
| 1569140_at   | UBR2           | -2,64318869  | -2,780313924 | 0,137125235 |  |
| 1569582_at   | LOC201651      | -2,64318869  | -2,780313924 | 0,137125235 |  |
| 205041_s_at  | ORM1 /// ORM2  | -2,64318869  | -2,780313924 | 0,137125235 |  |
| 211338_at    | IFNA2          | -2,64318869  | -2,780313924 | 0,137125235 |  |
| 211436_at    | -              | -2,64318869  | -2,780313924 | 0,137125235 |  |
| 213316_at    | KIAA1462       | -2,64318869  | -2,780313924 | 0,137125235 |  |
| 215824_at    | -              | -2,64318869  | -2,780313924 | 0,137125235 |  |
| 217583_at    | PAH            | -2,64318869  | -2,780313924 | 0,137125235 |  |
| 234480_at    | DKFZP761C171   | -2,64318869  | -2,780313924 | 0,137125235 |  |
| 237328_at    | C14orf105      | -2,64318869  | -2,780313924 | 0,137125235 |  |
| 241758_at    | -              | -2,64318869  | -2,780313924 | 0,137125235 |  |
| 243106_at    | CLEC12A        | -2,64318869  | -2,780313924 | 0,137125235 |  |
| 243347_at    | -              | -2,64318869  | -2,780313924 | 0,137125235 |  |
| 244097_at    | CR2            | -2,64318869  | -2,780313924 | 0,137125235 |  |
| 214801_at    | TOR1AIP2       | 3,321224383  | 3,184136378  | 0,137088005 |  |
| 1556464_a_at | C2orf72        | 0,57058931   | 0,433557298  | 0,137032012 |  |

|              |                 |              |              |             |  |
|--------------|-----------------|--------------|--------------|-------------|--|
| 225954_s_at  | MIDN            | 3,004080279  | 2,867091644  | 0,136988635 |  |
| 208786_s_at  | MAP1LC3B        | 3,50998543   | 3,373018423  | 0,136967007 |  |
| 225878_at    | KIF1B           | 2,834621043  | 2,697670403  | 0,13695064  |  |
| 227095_at    | LEPROT          | 4,074372924  | 3,937445604  | 0,13692732  |  |
| 227451_s_at  | CCDC90A         | 2,814842651  | 2,677924589  | 0,136918062 |  |
| 219182_at    | TMEM231         | 1,795990708  | 1,659204017  | 0,136786691 |  |
| 213009_s_at  | TRIM37          | 3,394805732  | 3,258033502  | 0,13677223  |  |
| 228152_s_at  | DDX60L          | 2,644299732  | 2,507538456  | 0,136761276 |  |
| 215954_s_at  | CACTIN          | 1,251994932  | 1,115234684  | 0,136760248 |  |
| 212725_s_at  | TUG1            | 4,571221501  | 4,434486264  | 0,136735237 |  |
| 1566701_at   | VRK3            | -0,543051993 | -0,679763839 | 0,136711846 |  |
| 215449_at    | TSPO2           | -0,543051993 | -0,679763839 | 0,136711846 |  |
| 222248_s_at  | SIRT4           | -0,543051993 | -0,679763839 | 0,136711846 |  |
| 228111_s_at  | DNAH1           | -0,543051993 | -0,679763839 | 0,136711846 |  |
| 230725_at    | ANKRD32         | -0,543051993 | -0,679763839 | 0,136711846 |  |
| 231280_at    | -               | -0,543051993 | -0,679763839 | 0,136711846 |  |
| 240164_at    | -               | -0,543051993 | -0,679763839 | 0,136711846 |  |
| 222127_s_at  | EXOC1           | 3,981211211  | 3,844556416  | 0,136654795 |  |
| 236132_at    | TLN1            | 1,191926657  | 1,055274826  | 0,136651831 |  |
| 214543_x_at  | QKI             | 3,078700536  | 2,942125533  | 0,136575003 |  |
| 223639_s_at  | ZNRD1           | 4,362800281  | 4,226225581  | 0,1365747   |  |
| 239047_at    | FAM122C         | 1,314003737  | 1,177496821  | 0,136506916 |  |
| 225951_s_at  | CHD2 /// LOC100 | 4,411731296  | 4,275233864  | 0,136497432 |  |
| 208310_s_at  | CCZ1 /// CCZ1B  | 3,692807389  | 3,556324192  | 0,136483198 |  |
| 203734_at    | FOXJ2           | 1,880387527  | 1,743944487  | 0,136443039 |  |
| 206430_at    | CDX1            | 0,841135803  | 0,704715219  | 0,136420584 |  |
| 210765_at    | CSE1L           | 0,841135803  | 0,704715219  | 0,136420584 |  |
| 229194_at    | PCGF5           | 2,194816625  | 2,058399602  | 0,136417024 |  |
| 212577_at    | SMCHD1          | 2,994644467  | 2,858346012  | 0,136298455 |  |
| 232612_s_at  | ATG16L1         | 1,672933557  | 1,536652708  | 0,136280849 |  |
| 242602_x_at  | ZNF254          | 1,672933557  | 1,536652708  | 0,136280849 |  |
| 221818_at    | INTS5           | 1,373456798  | 1,23718272   | 0,136274079 |  |
| 218645_at    | ZNF277          | 3,833280332  | 3,697038015  | 0,136242317 |  |
| 55692_at     | ELMO2           | 3,189186085  | 3,052950028  | 0,136236058 |  |
| 210849_s_at  | VPS41           | 2,782308844  | 2,646096941  | 0,136211903 |  |
| 210154_at    | ME2             | 2,718233611  | 2,582026171  | 0,136207439 |  |
| 229803_s_at  | NUDT3 /// RPS10 | 3,182077878  | 3,045906378  | 0,1361715   |  |
| 218258_at    | POLR1D          | 5,197928051  | 5,06176326   | 0,136164791 |  |
| 204628_s_at  | ITGB3           | 1,534677255  | 1,398700978  | 0,135976277 |  |
| 234987_at    | SAMHD1          | 2,535098095  | 2,39915583   | 0,135942266 |  |
| 209150_s_at  | TM9SF1          | 4,291933439  | 4,155999779  | 0,13593366  |  |
| 201604_s_at  | PPP1R12A        | 3,906268218  | 3,770352811  | 0,135915407 |  |
| 1554059_at   | SETMAR          | -0,00073712  | -0,136643983 | 0,135906862 |  |
| 228388_at    | NFKBIB          | -0,00073712  | -0,136643983 | 0,135906862 |  |
| 231682_at    | -               | -0,00073712  | -0,136643983 | 0,135906862 |  |
| 234921_at    | ZNF470          | -0,00073712  | -0,136643983 | 0,135906862 |  |
| 235762_at    | TAS2R14         | -0,00073712  | -0,136643983 | 0,135906862 |  |
| 215936_s_at  | KIAA1033        | -0,325749314 | -0,461594427 | 0,135845112 |  |
| 224348_s_at  | -               | -0,325749314 | -0,461594427 | 0,135845112 |  |
| 232720_at    | LINGO2          | -0,325749314 | -0,461594427 | 0,135845112 |  |
| 238540_at    | LOC401320       | -0,325749314 | -0,461594427 | 0,135845112 |  |
| 201830_s_at  | NET1            | 4,691650895  | 4,555975485  | 0,13567541  |  |
| 218030_at    | GIT1            | 2,487840343  | 2,352169913  | 0,13567043  |  |
| 1553796_at   | LOC100652811 /  | -1,196375121 | -1,332017329 | 0,135642208 |  |
| 1554280_a_at | C9orf43         | -1,196375121 | -1,332017329 | 0,135642208 |  |
| 1556255_a_at | LOC400756       | -1,196375121 | -1,332017329 | 0,135642208 |  |

|              |                 |              |              |             |  |
|--------------|-----------------|--------------|--------------|-------------|--|
| 1559154_at   | -               | -1,196375121 | -1,332017329 | 0,135642208 |  |
| 1569703_a_at | -               | -1,196375121 | -1,332017329 | 0,135642208 |  |
| 205736_at    | PGAM2           | -1,196375121 | -1,332017329 | 0,135642208 |  |
| 207282_s_at  | MYOG            | -1,196375121 | -1,332017329 | 0,135642208 |  |
| 219334_s_at  | NABP1           | -1,196375121 | -1,332017329 | 0,135642208 |  |
| 219874_at    | SLC12A8         | -1,196375121 | -1,332017329 | 0,135642208 |  |
| 223596_at    | SLC12A6         | -1,196375121 | -1,332017329 | 0,135642208 |  |
| 229404_at    | TWIST2          | -1,196375121 | -1,332017329 | 0,135642208 |  |
| 230675_at    | -               | -1,196375121 | -1,332017329 | 0,135642208 |  |
| 230975_at    | -               | -1,196375121 | -1,332017329 | 0,135642208 |  |
| 232413_at    | -               | -1,196375121 | -1,332017329 | 0,135642208 |  |
| 237525_at    | -               | -1,196375121 | -1,332017329 | 0,135642208 |  |
| 242694_at    | IQSEC3 /// LOC1 | -1,196375121 | -1,332017329 | 0,135642208 |  |
| 243038_at    | RBM43           | -1,196375121 | -1,332017329 | 0,135642208 |  |
| 243243_at    | GPC3            | -1,196375121 | -1,332017329 | 0,135642208 |  |
| 204054_at    | PTEN            | 1,381753566  | 1,246149888  | 0,135603678 |  |
| 1557260_a_at | ZNF382          | 3,220746604  | 3,08516499   | 0,135581614 |  |
| 225012_at    | HDLBP           | 2,355089531  | 2,21959457   | 0,135494961 |  |
| 1553607_at   | BACH1 /// GRIK1 | -3,212234735 | -3,347710726 | 0,135475991 |  |
| 1555928_at   | -               | -3,212234735 | -3,347710726 | 0,135475991 |  |
| 1559612_at   | -               | -3,212234735 | -3,347710726 | 0,135475991 |  |
| 1564631_at   | -               | -3,212234735 | -3,347710726 | 0,135475991 |  |
| 1554809_at   | LOC389199       | -0,148196756 | -0,283667828 | 0,135471071 |  |
| 1566923_at   | -               | -0,148196756 | -0,283667828 | 0,135471071 |  |
| 211234_x_at  | ESR1            | -0,148196756 | -0,283667828 | 0,135471071 |  |
| 215235_at    | SPTAN1          | -0,148196756 | -0,283667828 | 0,135471071 |  |
| 222856_at    | APLN            | -0,148196756 | -0,283667828 | 0,135471071 |  |
| 234795_at    | -               | -0,148196756 | -0,283667828 | 0,135471071 |  |
| 237401_at    | ACTN1           | -0,148196756 | -0,283667828 | 0,135471071 |  |
| 226265_at    | QSER1           | 4,754497159  | 4,619032017  | 0,135465142 |  |
| 212004_at    | C1orf144        | 2,854131948  | 2,718761062  | 0,135370886 |  |
| 203268_s_at  | DRG2            | 1,932146506  | 1,796776588  | 0,135369918 |  |
| 207535_s_at  | NFKB2           | 0,384950573  | 0,249604176  | 0,135346398 |  |
| 209420_s_at  | SMPD1           | 0,384950573  | 0,249604176  | 0,135346398 |  |
| 203100_s_at  | CDYL            | 3,299492934  | 3,164168347  | 0,135324587 |  |
| 228175_at    | SLC4A8          | 0,592200562  | 0,456918297  | 0,135282264 |  |
| 212113_at    | ATXN7L3B        | 2,043538949  | 1,908311039  | 0,13522791  |  |
| 225692_at    | CAMTA1          | 4,784922606  | 4,649767202  | 0,135155404 |  |
| 219307_at    | PDSS2           | 2,331726354  | 2,196649505  | 0,13507685  |  |
| 1552316_a_at | GIMAP1          | -2,712026959 | -2,847001814 | 0,134974855 |  |
| 1553823_a_at | RTP1            | -2,712026959 | -2,847001814 | 0,134974855 |  |
| 1555991_s_at | C22orf42        | -2,712026959 | -2,847001814 | 0,134974855 |  |
| 1557842_at   | -               | -2,712026959 | -2,847001814 | 0,134974855 |  |
| 1560979_a_at | -               | -2,712026959 | -2,847001814 | 0,134974855 |  |
| 1561247_at   | LOC283682       | -2,712026959 | -2,847001814 | 0,134974855 |  |
| 1561662_at   | -               | -2,712026959 | -2,847001814 | 0,134974855 |  |
| 1561998_at   | -               | -2,712026959 | -2,847001814 | 0,134974855 |  |
| 1565557_at   | -               | -2,712026959 | -2,847001814 | 0,134974855 |  |
| 1565732_at   | -               | -2,712026959 | -2,847001814 | 0,134974855 |  |
| 1566544_at   | -               | -2,712026959 | -2,847001814 | 0,134974855 |  |
| 1570130_at   | SPATS2          | -2,712026959 | -2,847001814 | 0,134974855 |  |
| 205259_at    | NR3C2           | -2,712026959 | -2,847001814 | 0,134974855 |  |
| 215094_at    | SPICE1          | -2,712026959 | -2,847001814 | 0,134974855 |  |
| 240144_at    | DNASE1          | -2,712026959 | -2,847001814 | 0,134974855 |  |
| 240657_at    | -               | -2,712026959 | -2,847001814 | 0,134974855 |  |
| 241762_at    | FBXO32          | -2,712026959 | -2,847001814 | 0,134974855 |  |



|              |                 |              |              |             |  |
|--------------|-----------------|--------------|--------------|-------------|--|
| 242893_at    | LOC100506267    | -2,712026959 | -2,847001814 | 0,134974855 |  |
| 243863_at    | ZCWPW2          | -2,712026959 | -2,847001814 | 0,134974855 |  |
| 243121_x_at  | -               | 0,859074518  | 0,724100169  | 0,134974349 |  |
| 232053_x_at  | RHBDD2          | 1,689737652  | 1,55481039   | 0,134927261 |  |
| 200653_s_at  | CALM1 /// CALM1 | 5,83284143   | 5,697993921  | 0,134847508 |  |
| 225099_at    | FBXO45          | 3,691139316  | 3,556324192  | 0,134815124 |  |
| 205389_s_at  | ANK1            | 1,215326747  | 1,080561626  | 0,134765122 |  |
| 205807_s_at  | TUFT1           | 2,277177578  | 2,14244844   | 0,134729139 |  |
| 219443_at    | TASP1           | 2,277177578  | 2,14244844   | 0,134729139 |  |
| 227208_at    | CCDC84          | 2,084778276  | 1,950068772  | 0,134709504 |  |
| 229504_at    | -               | 2,669932407  | 2,53523821   | 0,134694197 |  |
| 222794_x_at  | MTPAP           | 4,051152809  | 3,916534328  | 0,134618481 |  |
| 224250_s_at  | SECISBP2        | 1,394109935  | 1,259496994  | 0,134612941 |  |
| 223374_s_at  | B3GALNT1        | 2,051361651  | 1,916759838  | 0,134601814 |  |
| 1553717_at   | KCTD7 /// RABG  | -0,512251684 | -0,646746079 | 0,134494394 |  |
| 1566038_at   | DGCR7           | -0,512251684 | -0,646746079 | 0,134494394 |  |
| 206754_s_at  | CYP2B6 /// CYP2 | -0,512251684 | -0,646746079 | 0,134494394 |  |
| 208069_x_at  | CSH1 /// CSHL1  | -0,512251684 | -0,646746079 | 0,134494394 |  |
| 220353_at    | FAM86C1         | -0,512251684 | -0,646746079 | 0,134494394 |  |
| 234265_at    | PPP1R12C        | -0,512251684 | -0,646746079 | 0,134494394 |  |
| 238515_at    | NUDT16          | -0,512251684 | -0,646746079 | 0,134494394 |  |
| 236194_at    | -               | 2,553576109  | 2,419116683  | 0,134459426 |  |
| 37965_at     | PARVB           | 0,82601458   | 0,691645685  | 0,134368895 |  |
| 220234_at    | CA8             | 2,696781084  | 2,562416132  | 0,134364952 |  |
| 59999_at     | HIF1AN          | 2,384287546  | 2,250002661  | 0,134284885 |  |
| 222909_s_at  | BAG4            | 1,742232072  | 1,60795124   | 0,134280832 |  |
| 203567_s_at  | TRIM38          | 1,946200473  | 1,811954245  | 0,134246228 |  |
| 201256_at    | COX7A2L         | 4,849158785  | 4,715003086  | 0,134155699 |  |
| 203833_s_at  | TGOLN2          | 0,87091093   | 0,73688026   | 0,13403067  |  |
| 211114_x_at  | GEMIN2          | 3,655656719  | 3,521663705  | 0,133993015 |  |
| 211976_at    | -               | 3,655656719  | 3,521663705  | 0,133993015 |  |
| 208973_at    | ERI3            | 2,31665944   | 2,182705233  | 0,133954207 |  |
| 213612_x_at  | LOC100506032 /  | 5,450264243  | 5,316319697  | 0,133944546 |  |
| 219449_s_at  | TMEM70          | 4,553887643  | 4,419948427  | 0,133939216 |  |
| 223101_s_at  | ARPC5L          | 2,37600538   | 2,242180416  | 0,133824964 |  |
| 224427_s_at  | PAPOLG          | 1,163336153  | 1,029536893  | 0,13379926  |  |
| 207749_s_at  | PPP2R3A         | 0,792179257  | 0,658444279  | 0,133734978 |  |
| 237105_at    | LOC100506831    | 0,792179257  | 0,658444279  | 0,133734978 |  |
| 57532_at     | DVL2            | 2,562727117  | 2,428994491  | 0,133732626 |  |
| 202784_s_at  | NNT             | 1,512180019  | 1,378453643  | 0,133726376 |  |
| 212167_s_at  | SMARCB1         | 2,635653293  | 2,501934108  | 0,133719185 |  |
| 224649_x_at  | CCNY            | 2,635653293  | 2,501934108  | 0,133719185 |  |
| 212849_at    | AXIN1           | 1,659347917  | 1,525647381  | 0,133700537 |  |
| 222548_s_at  | MAP4K4          | 1,659347917  | 1,525647381  | 0,133700537 |  |
| 221448_s_at  | TEX15           | 1,027166904  | 0,893473268  | 0,133693637 |  |
| 1556099_at   | LINC00290       | -2,756478458 | -2,89013181  | 0,133653352 |  |
| 1556655_s_at | -               | -2,756478458 | -2,89013181  | 0,133653352 |  |
| 1557647_a_at | LOC100507240    | -2,756478458 | -2,89013181  | 0,133653352 |  |
| 1560721_at   | -               | -2,756478458 | -2,89013181  | 0,133653352 |  |
| 1560735_s_at | LOC727924 /// O | -2,756478458 | -2,89013181  | 0,133653352 |  |
| 1561442_at   | LOC283585       | -2,756478458 | -2,89013181  | 0,133653352 |  |
| 1563053_at   | LOC729083       | -2,756478458 | -2,89013181  | 0,133653352 |  |
| 1563834_a_at | AKNAD1          | -2,756478458 | -2,89013181  | 0,133653352 |  |
| 1564358_at   | -               | -2,756478458 | -2,89013181  | 0,133653352 |  |
| 1564841_at   | -               | -2,756478458 | -2,89013181  | 0,133653352 |  |
| 1564937_at   | -               | -2,756478458 | -2,89013181  | 0,133653352 |  |

|              |           |              |              |             |  |
|--------------|-----------|--------------|--------------|-------------|--|
| 1569407_at   | -         | -2,756478458 | -2,89013181  | 0,133653352 |  |
| 203850_s_at  | KIF1A     | -2,756478458 | -2,89013181  | 0,133653352 |  |
| 206022_at    | NDP       | -2,756478458 | -2,89013181  | 0,133653352 |  |
| 216632_at    | NAV3      | -2,756478458 | -2,89013181  | 0,133653352 |  |
| 221233_s_at  | FAM135A   | -2,756478458 | -2,89013181  | 0,133653352 |  |
| 228038_at    | SOX2      | -2,756478458 | -2,89013181  | 0,133653352 |  |
| 229084_at    | CNTN4     | -2,756478458 | -2,89013181  | 0,133653352 |  |
| 229461_x_at  | NEGR1     | -2,756478458 | -2,89013181  | 0,133653352 |  |
| 234110_at    | LOC283075 | -2,756478458 | -2,89013181  | 0,133653352 |  |
| 234517_at    | -         | -2,756478458 | -2,89013181  | 0,133653352 |  |
| 241656_at    | -         | -2,756478458 | -2,89013181  | 0,133653352 |  |
| 242524_at    | CBLN4     | -2,756478458 | -2,89013181  | 0,133653352 |  |
| 243641_at    | -         | -2,756478458 | -2,89013181  | 0,133653352 |  |
| 222627_at    | VPS54     | 2,027765132  | 1,894118818  | 0,133646314 |  |
| 1557331_at   | POLR1B    | 1,406361373  | 1,272721751  | 0,133639622 |  |
| 222887_s_at  | TMEM127   | 1,406361373  | 1,272721751  | 0,133639622 |  |
| 228340_at    | TLE3      | 1,406361373  | 1,272721751  | 0,133639622 |  |
| 201238_s_at  | CAPZA2    | 6,085317171  | 5,951678905  | 0,133638266 |  |
| 224699_s_at  | ESYT2     | 3,420201053  | 3,28656411   | 0,133636943 |  |
| 212925_at    | C19orf21  | 0,291166226  | 0,157549243  | 0,133616983 |  |
| 214226_at    | PRSS53    | 0,291166226  | 0,157549243  | 0,133616983 |  |
| 235908_at    | MMP11     | 0,291166226  | 0,157549243  | 0,133616983 |  |
| 236883_at    | -         | 0,291166226  | 0,157549243  | 0,133616983 |  |
| 203623_at    | PLXNA3    | 0,613492853  | 0,479907041  | 0,133585812 |  |
| 208042_at    | AGGF1     | 0,613492853  | 0,479907041  | 0,133585812 |  |
| 235686_at    | TYW5      | 0,613492853  | 0,479907041  | 0,133585812 |  |
| 208692_at    | RPS3      | 7,64704569   | 7,513528164  | 0,133517526 |  |
| 201780_s_at  | RNF13     | 2,59162628   | 2,458228496  | 0,133397784 |  |
| 225624_at    | SNX29     | 0,03125738   | -0,102100538 | 0,133357918 |  |
| 241795_at    | RHEB      | 0,03125738   | -0,102100538 | 0,133357918 |  |
| 205128_x_at  | PTGS1     | 3,786397376  | 3,653046807  | 0,133350569 |  |
| 218066_at    | SLC12A7   | 3,517535002  | 3,384231608  | 0,133303394 |  |
| 204871_at    | MTERF     | 1,960118853  | 1,826973888  | 0,133144965 |  |
| 227049_at    | ZADH2     | 1,841816345  | 1,708698295  | 0,13311805  |  |
| 1555823_at   | PACS2     | 3,883077619  | 3,75000829   | 0,133069329 |  |
| 201410_at    | PLEKHB2   | 4,984696817  | 4,851633873  | 0,133062944 |  |
| 203264_s_at  | ARHGEF9   | 1,758252436  | 1,6252386    | 0,133013836 |  |
| 229653_at    | VPS53     | 1,758252436  | 1,6252386    | 0,133013836 |  |
| 214442_s_at  | PIAS2     | 2,173470163  | 2,040470494  | 0,132999669 |  |
| 208655_at    | CCNI      | 4,123436638  | 3,990437532  | 0,132999106 |  |
| 215017_s_at  | FNBP1L    | 2,2992452    | 2,166264721  | 0,132980479 |  |
| 207738_s_at  | NCKAP1    | 4,246090231  | 4,113143231  | 0,132947    |  |
| 1554268_at   | MORN1     | -1,131062212 | -1,264005341 | 0,132943128 |  |
| 1557064_s_at | HGSNAT    | -1,131062212 | -1,264005341 | 0,132943128 |  |
| 1564446_at   | LOC284930 | -1,131062212 | -1,264005341 | 0,132943128 |  |
| 202198_s_at  | MTMR3     | -1,131062212 | -1,264005341 | 0,132943128 |  |
| 208477_at    | KCNC1     | -1,131062212 | -1,264005341 | 0,132943128 |  |
| 221102_s_at  | TRPM6     | -1,131062212 | -1,264005341 | 0,132943128 |  |
| 221332_at    | BMP15     | -1,131062212 | -1,264005341 | 0,132943128 |  |
| 222268_x_at  | MUC5B     | -1,131062212 | -1,264005341 | 0,132943128 |  |
| 229177_at    | C16orf89  | -1,131062212 | -1,264005341 | 0,132943128 |  |
| 237945_at    | -         | -1,131062212 | -1,264005341 | 0,132943128 |  |
| 241067_at    | -         | -1,131062212 | -1,264005341 | 0,132943128 |  |
| 241690_at    | FAM205B   | -1,131062212 | -1,264005341 | 0,132943128 |  |
| 242902_at    | CYMP      | -1,131062212 | -1,264005341 | 0,132943128 |  |
| 243603_at    | -         | -1,131062212 | -1,264005341 | 0,132943128 |  |

|              |                   |              |             |             |  |
|--------------|-------------------|--------------|-------------|-------------|--|
| 202008_s_at  | NID1              | 1,037706275  | 0,904843258 | 0,132863017 |  |
| 223626_x_at  | IFI27L2           | 1,523472489  | 1,390636111 | 0,132836378 |  |
| 224625_x_at  | C15orf63 /// MIR1 | 6,64552699   | 6,512702464 | 0,132824527 |  |
| 1563947_a_at | ERC1              | -0,285837228 | -0,41858459 | 0,132747361 |  |
| 201850_at    | CAPG              | -0,285837228 | -0,41858459 | 0,132747361 |  |
| 206474_at    | CDK17             | -0,285837228 | -0,41858459 | 0,132747361 |  |
| 220747_at    | HSPC072           | -0,285837228 | -0,41858459 | 0,132747361 |  |
| 225709_at    | ARL6IP6           | -0,285837228 | -0,41858459 | 0,132747361 |  |
| 229601_at    | SCYL1             | -0,285837228 | -0,41858459 | 0,132747361 |  |
| 231638_at    | PRSS30P           | -0,285837228 | -0,41858459 | 0,132747361 |  |
| 232508_at    | ZMIZ1             | -0,285837228 | -0,41858459 | 0,132747361 |  |
| 239246_at    | FARP1             | -0,285837228 | -0,41858459 | 0,132747361 |  |
| 240849_at    | -                 | -0,285837228 | -0,41858459 | 0,132747361 |  |
| 221939_at    | YIPF2             | 3,956428813  | 3,823741953 | 0,13268686  |  |
| 212104_s_at  | RBFOX2            | 2,718233611  | 2,585563171 | 0,13267044  |  |
| 223115_at    | MED17             | 0,888485433  | 0,755840599 | 0,132644834 |  |
| 226013_at    | TRAK1             | 0,888485433  | 0,755840599 | 0,132644834 |  |
| 227305_s_at  | SMCR8             | 4,281994342  | 4,149442805 | 0,132551537 |  |
| 218008_at    | TMEM248           | 3,939667505  | 3,807174423 | 0,132493082 |  |
| 215833_s_at  | SPPL2B            | 0,627515113  | 0,495031851 | 0,132483262 |  |
| 217023_x_at  | TPSAB1 /// TPSE   | 0,627515113  | 0,495031851 | 0,132483262 |  |
| 229882_at    | RPS15A            | 0,627515113  | 0,495031851 | 0,132483262 |  |
| 237473_at    | PPIEL             | 0,627515113  | 0,495031851 | 0,132483262 |  |
| 212416_at    | SCAMP1            | 3,663333942  | 3,530865925 | 0,132468018 |  |
| 208980_s_at  | UBC               | 6,82042267   | 6,687974626 | 0,132448044 |  |
| 203346_s_at  | MTF2              | 3,503346991  | 3,370970266 | 0,132376726 |  |
| 202527_s_at  | SMAD4             | 2,87191078   | 2,739547836 | 0,132362944 |  |
| 209248_at    | GHITM             | 5,578621938  | 5,446261552 | 0,132360386 |  |
| 202670_at    | MAP2K1            | 4,351756271  | 4,219411762 | 0,132344509 |  |
| 200005_at    | EIF3D             | 5,711375436  | 5,579053664 | 0,132321772 |  |
| 225784_s_at  | ZC4H2             | 1,722769813  | 1,590454215 | 0,132315598 |  |
| 208184_s_at  | TRAPPC10          | 2,580856819  | 2,448549499 | 0,13230732  |  |
| 226119_at    | PCMTD1            | 2,605861638  | 2,473581079 | 0,132280558 |  |
| 209595_at    | GTF2F2            | 2,478200152  | 2,345926937 | 0,132273215 |  |
| 1554508_at   | PIK3AP1           | 0,30867765   | 0,176436073 | 0,132241577 |  |
| 1558484_s_at | LRRC27            | 0,30867765   | 0,176436073 | 0,132241577 |  |
| 209170_s_at  | GPM6B             | 0,30867765   | 0,176436073 | 0,132241577 |  |
| 214731_at    | -                 | 0,30867765   | 0,176436073 | 0,132241577 |  |
| 229827_at    | BUB3              | 0,30867765   | 0,176436073 | 0,132241577 |  |
| 231161_x_at  | -                 | 0,30867765   | 0,176436073 | 0,132241577 |  |
| 210252_s_at  | MADD              | 2,531373922  | 2,39915583  | 0,132218092 |  |
| 212749_s_at  | RCHY1             | 4,046594062  | 3,914426433 | 0,132167629 |  |
| 235094_at    | -                 | 2,082235068  | 1,950068772 | 0,132166295 |  |
| 209805_at    | PMS2 /// PMS2C    | 1,631786706  | 1,499637023 | 0,132149683 |  |
| 211554_s_at  | APAF1             | 0,425644434  | 0,293518836 | 0,132125598 |  |
| 223589_at    | ZNF416            | 1,426552034  | 1,294497133 | 0,132054901 |  |
| 230021_at    | C15orf42          | 1,426552034  | 1,294497133 | 0,132054901 |  |
| 203081_at    | CTNNBIP1          | 2,048758794  | 1,916759838 | 0,131998956 |  |
| 209317_at    | POLR1C            | 4,235256884  | 4,103307085 | 0,131949799 |  |
| 204550_x_at  | GSTM1             | 1,187200746  | 1,055274826 | 0,13192592  |  |
| 1555292_at   | FAM40B            | 1,897847661  | 1,765933685 | 0,131913976 |  |
| 204420_at    | FOSL1             | 1,897847661  | 1,765933685 | 0,131913976 |  |
| 202159_at    | FARSA             | 3,251631457  | 3,119728903 | 0,131902554 |  |
| 225936_at    | EID2              | 3,827217859  | 3,695402096 | 0,131815762 |  |
| 213005_s_at  | KANK1             | 0,900083947  | 0,768343791 | 0,131740157 |  |
| 214958_s_at  | TMC6              | 0,900083947  | 0,768343791 | 0,131740157 |  |

|              |                  |              |              |             |  |
|--------------|------------------|--------------|--------------|-------------|--|
| 1558103_a_at | -                | 0,052199481  | -0,079522948 | 0,131722429 |  |
| 1569296_a_at | -                | 0,052199481  | -0,079522948 | 0,131722429 |  |
| 216658_at    | -                | 0,052199481  | -0,079522948 | 0,131722429 |  |
| 230168_at    | -                | 0,052199481  | -0,079522948 | 0,131722429 |  |
| 235699_at    | REM2             | 0,052199481  | -0,079522948 | 0,131722429 |  |
| 211529_x_at  | HLA-G            | 4,685380613  | 4,553720057  | 0,131660556 |  |
| 201461_s_at  | MAPKAPK2         | 1,05337236   | 0,921731975  | 0,131640384 |  |
| 204316_at    | RGS10            | 1,05337236   | 0,921731975  | 0,131640384 |  |
| 213133_s_at  | GCSH             | 4,63941169   | 4,507854821  | 0,131556869 |  |
| 200723_s_at  | CAPRIN1          | 5,729772784  | 5,598221512  | 0,131551272 |  |
| 223350_x_at  | LIN7C            | 3,999522577  | 3,86798237   | 0,131540207 |  |
| 212243_at    | GCOM1 /// POLR   | 2,540666392  | 2,409170778  | 0,131495614 |  |
| 201174_s_at  | TERF2IP          | 4,176858496  | 4,045409633  | 0,131448863 |  |
| 1558139_at   | FLJ39632 /// LOC | 1,434549838  | 1,303116084  | 0,131433753 |  |
| 227228_s_at  | CCDC88C          | 1,434549838  | 1,303116084  | 0,131433753 |  |
| 203194_s_at  | NUP98            | 2,406821352  | 2,275409734  | 0,131411618 |  |
| 1553739_at   | IRAK2            | -2,823166348 | -2,954576755 | 0,131410407 |  |
| 1554190_s_at | PLEKHS1          | -2,823166348 | -2,954576755 | 0,131410407 |  |
| 1555403_a_at | CDH19            | -2,823166348 | -2,954576755 | 0,131410407 |  |
| 1555623_at   | -                | -2,823166348 | -2,954576755 | 0,131410407 |  |
| 1556448_a_at | LINC00606        | -2,823166348 | -2,954576755 | 0,131410407 |  |
| 1556529_a_at | LOC285326        | -2,823166348 | -2,954576755 | 0,131410407 |  |
| 1557735_at   | -                | -2,823166348 | -2,954576755 | 0,131410407 |  |
| 1566882_at   | -                | -2,823166348 | -2,954576755 | 0,131410407 |  |
| 1567361_at   | BDNF-AS          | -2,823166348 | -2,954576755 | 0,131410407 |  |
| 210732_s_at  | LGALS8           | -2,823166348 | -2,954576755 | 0,131410407 |  |
| 210767_at    | NF2              | -2,823166348 | -2,954576755 | 0,131410407 |  |
| 211766_s_at  | PNLIPRP2         | -2,823166348 | -2,954576755 | 0,131410407 |  |
| 215763_at    | -                | -2,823166348 | -2,954576755 | 0,131410407 |  |
| 219230_at    | TMEM100          | -2,823166348 | -2,954576755 | 0,131410407 |  |
| 220586_at    | CHD9             | -2,823166348 | -2,954576755 | 0,131410407 |  |
| 231690_at    | -                | -2,823166348 | -2,954576755 | 0,131410407 |  |
| 237056_at    | INSC             | -2,823166348 | -2,954576755 | 0,131410407 |  |
| 237873_s_at  | -                | -2,823166348 | -2,954576755 | 0,131410407 |  |
| 240061_at    | -                | -2,823166348 | -2,954576755 | 0,131410407 |  |
| 241482_at    | EPHA1            | -2,823166348 | -2,954576755 | 0,131410407 |  |
| 228595_at    | HSD17B1          | 1,593009234  | 1,461646549  | 0,131362685 |  |
| 219868_s_at  | ANKFY1           | 0,735041319  | 0,603679647  | 0,131361673 |  |
| 200638_s_at  | YWHAZ            | 6,473160945  | 6,34180139   | 0,131359555 |  |
| 1558584_at   | UBL4B            | 0,822971223  | 0,691645685  | 0,131325538 |  |
| 223260_s_at  | POLK             | 0,822971223  | 0,691645685  | 0,131325538 |  |
| 211090_s_at  | PRPF4B           | 3,769107843  | 3,637795954  | 0,131311889 |  |
| 214327_x_at  | TPT1             | 7,246486658  | 7,115177681  | 0,131308978 |  |
| 228397_at    | TUG1             | 2,320980353  | 2,189694216  | 0,131286137 |  |
| 229850_at    | KDSR             | 1,865674241  | 1,73441697   | 0,131257271 |  |
| 57540_at     | RBKS             | 0,380817344  | 0,249604497  | 0,131212847 |  |
| 228768_at    | FNIP1            | 3,737131445  | 3,605931378  | 0,131200066 |  |
| 207082_at    | CSF1             | -1,089016378 | -1,220210588 | 0,13119421  |  |
| 209887_at    | SMAD6            | -1,089016378 | -1,220210588 | 0,13119421  |  |
| 215892_at    | ZNF440           | -1,089016378 | -1,220210588 | 0,13119421  |  |
| 216247_at    | RPS20 /// SNOR   | -1,089016378 | -1,220210588 | 0,13119421  |  |
| 220279_at    | TRIM17           | -1,089016378 | -1,220210588 | 0,13119421  |  |
| 220282_at    | RIC3             | -1,089016378 | -1,220210588 | 0,13119421  |  |
| 223798_at    | SLC41A2          | -1,089016378 | -1,220210588 | 0,13119421  |  |
| 227097_at    | -                | -1,089016378 | -1,220210588 | 0,13119421  |  |
| 233375_at    | EFCAB2           | -1,089016378 | -1,220210588 | 0,13119421  |  |

|              |                 |              |              |             |  |
|--------------|-----------------|--------------|--------------|-------------|--|
| 235092_at    | -               | -1,089016378 | -1,220210588 | 0,13119421  |  |
| 238500_at    | EMP2            | -1,089016378 | -1,220210588 | 0,13119421  |  |
| 239688_at    | SMC1A           | -1,089016378 | -1,220210588 | 0,13119421  |  |
| 242303_at    | NRG2            | -1,089016378 | -1,220210588 | 0,13119421  |  |
| 243440_at    | SIX3-AS1        | -1,089016378 | -1,220210588 | 0,13119421  |  |
| 1554168_a_at | SH3KBP1         | 4,138203514  | 4,007018329  | 0,131185185 |  |
| 214752_x_at  | FLNA            | 3,595400101  | 3,464222256  | 0,131177845 |  |
| 37433_at     | PIAS2           | 0,644853431  | 0,513717619  | 0,131135812 |  |
| 57163_at     | ELOVL1          | 2,908260915  | 2,777153862  | 0,131107053 |  |
| 227267_at    | POC5            | 1,69307511   | 1,562009954  | 0,131065156 |  |
| 233049_x_at  | STUB1           | 4,446258267  | 4,31519468   | 0,131063587 |  |
| 228009_x_at  | ZNRD1           | 4,953379586  | 4,822328446  | 0,13105114  |  |
| 200025_s_at  | RPL27           | 7,801279985  | 7,67024222   | 0,131037765 |  |
| 218875_s_at  | FBXO5           | 4,546987586  | 4,41598058   | 0,131007006 |  |
| 201839_s_at  | EPCAM           | 5,635779871  | 5,504875333  | 0,130904538 |  |
| 1553479_at   | TMEM145         | -0,089689931 | -0,220592223 | 0,130902292 |  |
| 208465_at    | GRM2            | -0,089689931 | -0,220592223 | 0,130902292 |  |
| 213748_at    | TRIM66          | -0,089689931 | -0,220592223 | 0,130902292 |  |
| 220600_at    | C3orf75         | -0,089689931 | -0,220592223 | 0,130902292 |  |
| 224049_at    | KCNK17          | -0,089689931 | -0,220592223 | 0,130902292 |  |
| 227544_at    | TMEM229B        | -0,089689931 | -0,220592223 | 0,130902292 |  |
| 227573_s_at  | OBSL1           | -0,089689931 | -0,220592223 | 0,130902292 |  |
| 229313_at    | ANO5            | -0,089689931 | -0,220592223 | 0,130902292 |  |
| 229854_at    | OBSCN           | -0,089689931 | -0,220592223 | 0,130902292 |  |
| 238082_at    | -               | -0,089689931 | -0,220592223 | 0,130902292 |  |
| 1564112_at   | FAM71A          | 0,44160593   | 0,310717132  | 0,130888798 |  |
| 213349_at    | TMCC1           | 0,44160593   | 0,310717132  | 0,130888798 |  |
| 216698_x_at  | OR7E12P         | 0,44160593   | 0,310717132  | 0,130888798 |  |
| 35147_at     | MCF2L           | 0,496120222  | 0,365236551  | 0,130883671 |  |
| 223454_at    | CXCL16          | 0,648296226  | 0,51742585   | 0,130870375 |  |
| 230634_x_at  | ADAT3           | 0,648296226  | 0,51742585   | 0,130870375 |  |
| 212120_at    | RHOQ            | 2,266015882  | 2,135226207  | 0,130789675 |  |
| 212869_x_at  | TPT1            | 8,130584911  | 7,999803985  | 0,130780926 |  |
| 208609_s_at  | TNXB            | -0,259832361 | -0,39061235  | 0,130779989 |  |
| 209261_s_at  | NR2F6           | -0,259832361 | -0,39061235  | 0,130779989 |  |
| 227169_at    | DNAJC18         | -0,259832361 | -0,39061235  | 0,130779989 |  |
| 234499_at    | -               | -0,259832361 | -0,39061235  | 0,130779989 |  |
| 235845_at    | SP5             | -0,259832361 | -0,39061235  | 0,130779989 |  |
| 221989_at    | RPL10 /// SNORA | 2,742596529  | 2,611817827  | 0,130778702 |  |
| 229835_s_at  | SLMO2           | 2,416948786  | 2,286318242  | 0,130630544 |  |
| 227580_s_at  | TECPR1          | 2,102456302  | 1,971855016  | 0,130601286 |  |
| 200857_s_at  | NCOR1           | 1,789769151  | 1,659204017  | 0,130565134 |  |
| 216331_at    | ITGA7           | 1,390002893  | 1,259496994  | 0,130505899 |  |
| 224786_at    | SCOC            | 5,054797981  | 4,924316041  | 0,13048194  |  |
| 204240_s_at  | SMC2            | 3,617524043  | 3,487095824  | 0,130428219 |  |
| 240307_at    | -               | 0,917308734  | 0,786897721  | 0,130411013 |  |
| 32032_at     | DGCR14 /// TSS  | 3,296204798  | 3,165941392  | 0,130263407 |  |
| 1555705_a_at | CMTM3           | 2,997346717  | 2,867091644  | 0,130255072 |  |
| 200003_s_at  | RPL28           | 8,048117714  | 7,917867472  | 0,130250242 |  |
| 239333_x_at  | -               | 0,334552598  | 0,204310755  | 0,130241843 |  |
| 216508_x_at  | -               | 4,378950369  | 4,248708657  | 0,130241711 |  |
| 202352_s_at  | PSMD12          | 5,323562354  | 5,193345242  | 0,130217112 |  |
| 215952_s_at  | OAZ1            | 6,713043537  | 6,582844205  | 0,130199332 |  |
| 1563983_at   | TPT1-AS1        | 0,209623097  | 0,079428135  | 0,130194962 |  |
| 228250_at    | FNIP1           | 0,209623097  | 0,079428135  | 0,130194962 |  |
| 214726_x_at  | ADD1            | 1,274448124  | 1,144305291  | 0,130142833 |  |

|              |                 |              |              |             |  |
|--------------|-----------------|--------------|--------------|-------------|--|
| 238898_at    | LOC100505730    | 1,274448124  | 1,144305291  | 0,130142833 |  |
| 202149_at    | NEDD9           | 1,880387527  | 1,750261389  | 0,130126138 |  |
| 227226_at    | MRAP2           | 2,506929603  | 2,376875125  | 0,130054478 |  |
| 225456_at    | MED1            | 3,000043914  | 2,869995113  | 0,130048801 |  |
| 217852_s_at  | ARL8B           | 5,656015641  | 5,525968169  | 0,130047472 |  |
| 1553930_at   | TAAR1           | -2,866296344 | -2,996335703 | 0,130039359 |  |
| 1555307_at   | TTF2            | -2,866296344 | -2,996335703 | 0,130039359 |  |
| 1555369_at   | BAGE            | -2,866296344 | -2,996335703 | 0,130039359 |  |
| 1558226_a_at | -               | -2,866296344 | -2,996335703 | 0,130039359 |  |
| 1559707_at   | -               | -2,866296344 | -2,996335703 | 0,130039359 |  |
| 1560637_at   | -               | -2,866296344 | -2,996335703 | 0,130039359 |  |
| 1562418_at   | -               | -2,866296344 | -2,996335703 | 0,130039359 |  |
| 1564807_at   | -               | -2,866296344 | -2,996335703 | 0,130039359 |  |
| 207307_at    | HTR2C           | -2,866296344 | -2,996335703 | 0,130039359 |  |
| 211878_at    | -               | -2,866296344 | -2,996335703 | 0,130039359 |  |
| 214012_at    | ERAP1           | -2,866296344 | -2,996335703 | 0,130039359 |  |
| 214685_at    | NOP14-AS1       | -2,866296344 | -2,996335703 | 0,130039359 |  |
| 215634_at    | -               | -2,866296344 | -2,996335703 | 0,130039359 |  |
| 215878_at    | ITGB1           | -2,866296344 | -2,996335703 | 0,130039359 |  |
| 216440_at    | -               | -2,866296344 | -2,996335703 | 0,130039359 |  |
| 231581_at    | LOC400680       | -2,866296344 | -2,996335703 | 0,130039359 |  |
| 233084_s_at  | SYCE1           | -2,866296344 | -2,996335703 | 0,130039359 |  |
| 233904_at    | -               | -2,866296344 | -2,996335703 | 0,130039359 |  |
| 234134_at    | -               | -2,866296344 | -2,996335703 | 0,130039359 |  |
| 234501_x_at  | -               | -2,866296344 | -2,996335703 | 0,130039359 |  |
| 237729_at    | LOC100505676    | -2,866296344 | -2,996335703 | 0,130039359 |  |
| 238264_at    | -               | -2,866296344 | -2,996335703 | 0,130039359 |  |
| 238957_at    | PDXDC2P         | -2,866296344 | -2,996335703 | 0,130039359 |  |
| 240819_at    | -               | -2,866296344 | -2,996335703 | 0,130039359 |  |
| 241206_at    | -               | -2,866296344 | -2,996335703 | 0,130039359 |  |
| 241283_at    | -               | -2,866296344 | -2,996335703 | 0,130039359 |  |
| 242252_at    | -               | -2,866296344 | -2,996335703 | 0,130039359 |  |
| 242401_x_at  | -               | -2,866296344 | -2,996335703 | 0,130039359 |  |
| 228536_at    | PRMT10          | 2,109966786  | 1,979940779  | 0,130026007 |  |
| 48117_at     | CCDC101         | 1,367202759  | 1,23718272   | 0,13002004  |  |
| 226285_at    | CAPRIN1         | 2,683419202  | 2,553413592  | 0,130005609 |  |
| 203255_at    | FBXO11          | 3,396853889  | 3,266872397  | 0,129981493 |  |
| 238389_s_at  | -               | 1,560488174  | 1,43051703   | 0,129971144 |  |
| 203159_at    | GLS             | 2,277177578  | 2,147243253  | 0,129934326 |  |
| 217913_at    | VPS4A           | 3,146001821  | 3,016072743  | 0,129929077 |  |
| 226976_at    | KPNA6 /// LOC10 | 3,076146581  | 2,946258252  | 0,129888329 |  |
| 233873_x_at  | MTPAP           | 3,002736078  | 2,87289275   | 0,129843328 |  |
| 202617_s_at  | MECP2           | 0,661985843  | 0,532164371  | 0,129821472 |  |
| 227777_at    | -               | 0,661985843  | 0,532164371  | 0,129821472 |  |
| 231817_at    | USP53           | 1,709647566  | 1,579853228  | 0,129794337 |  |
| 213649_at    | SRSF7           | 2,732900676  | 2,603119255  | 0,129781421 |  |
| 224319_s_at  | SMCR7L          | 2,003776245  | 1,874012195  | 0,12976405  |  |
| 224573_at    | RNASEK /// RNA  | 5,835675329  | 5,705937317  | 0,129738012 |  |
| 217165_x_at  | MT1F            | 4,463949573  | 4,334242016  | 0,129707557 |  |
| 220807_at    | HBQ1            | 2,400710591  | 2,271023131  | 0,12968746  |  |
| 227617_at    | TMEM201         | 2,400710591  | 2,271023131  | 0,12968746  |  |
| 212649_at    | DHX29           | 1,079110292  | 0,949447784  | 0,129662508 |  |
| 37590_g_at   | -               | -0,680266109 | -0,809921974 | 0,129655865 |  |
| 225927_at    | MAP3K1          | 3,907705327  | 3,778101865  | 0,129603462 |  |
| 229957_at    | TMEM91          | 1,40228911   | 1,272721751  | 0,129567359 |  |
| 224943_at    | BTBD7           | 1,283332461  | 1,153866761  | 0,129465699 |  |

|              |                 |              |              |             |  |
|--------------|-----------------|--------------|--------------|-------------|--|
| 212071_s_at  | SPTBN1          | 2,737756747  | 2,608344689  | 0,129412058 |  |
| 206611_at    | C2orf27A        | 0,083054335  | -0,046302147 | 0,129356482 |  |
| 217891_at    | C16orf58        | 0,083054335  | -0,046302147 | 0,129356482 |  |
| 222960_at    | CACNA1H         | 0,083054335  | -0,046302147 | 0,129356482 |  |
| 1553959_a_at | B3GALT6         | 3,838564178  | 3,709248632  | 0,129315547 |  |
| 226263_at    | SNRNP48         | 2,912562019  | 2,783327323  | 0,129234696 |  |
| 203419_at    | MLL4            | 2,646022818  | 2,516830926  | 0,129191893 |  |
| 221515_s_at  | LCMT1           | 3,53158484   | 3,402394519  | 0,129190321 |  |
| 224888_at    | EPT1            | 2,348755185  | 2,21959457   | 0,129160615 |  |
| 1553174_at   | JPH2            | -0,43775896  | -0,566887459 | 0,129128499 |  |
| 1561305_at   | -               | -0,43775896  | -0,566887459 | 0,129128499 |  |
| 209223_at    | NDUFA2          | -0,43775896  | -0,566887459 | 0,129128499 |  |
| 217625_x_at  | LOC100506190    | -0,43775896  | -0,566887459 | 0,129128499 |  |
| 217691_x_at  | SLC16A3         | -0,43775896  | -0,566887459 | 0,129128499 |  |
| 227329_at    | ZBTB46          | -0,43775896  | -0,566887459 | 0,129128499 |  |
| 228034_x_at  | ALKBH5 /// LOC1 | -0,43775896  | -0,566887459 | 0,129128499 |  |
| 236736_at    | -               | -0,43775896  | -0,566887459 | 0,129128499 |  |
| 238193_at    | -               | -0,43775896  | -0,566887459 | 0,129128499 |  |
| 227854_at    | -               | 0,46522187   | 0,336136178  | 0,129085693 |  |
| 201940_at    | CPD             | 1,894952274  | 1,765933685  | 0,129018589 |  |
| 202246_s_at  | CDK4            | 5,096666579  | 4,967654074  | 0,129012505 |  |
| 223210_at    | CHURC1          | 2,051361651  | 1,922365006  | 0,128996645 |  |
| 201819_at    | SCARB1          | 1,672933557  | 1,543943227  | 0,128990329 |  |
| 219001_s_at  | DCAF10          | 1,672933557  | 1,543943227  | 0,128990329 |  |
| 210574_s_at  | NUDC            | 5,004644064  | 4,875668581  | 0,128975483 |  |
| 223068_at    | EML4            | 3,508091848  | 3,379145507  | 0,128946341 |  |
| 242407_at    | -               | 0,767063567  | 0,638150376  | 0,128913191 |  |
| 206097_at    | SLC22A18AS      | 1,089278259  | 0,960386719  | 0,12889154  |  |
| 223440_at    | C16orf70        | 2,194816625  | 2,066015817  | 0,128800808 |  |
| 238070_at    | CHD1L           | 2,194816625  | 2,066015817  | 0,128800808 |  |
| 201190_s_at  | PITPNA          | 3,67603922   | 3,547283438  | 0,128755782 |  |
| 1553022_at   | ZIM3            | -2,908843709 | -3,037500868 | 0,128657159 |  |
| 1559953_at   | DDX42           | -2,908843709 | -3,037500868 | 0,128657159 |  |
| 1561196_at   | -               | -2,908843709 | -3,037500868 | 0,128657159 |  |
| 1562736_at   | LHX9            | -2,908843709 | -3,037500868 | 0,128657159 |  |
| 1562880_at   | LOC100288238    | -2,908843709 | -3,037500868 | 0,128657159 |  |
| 1563611_at   | -               | -2,908843709 | -3,037500868 | 0,128657159 |  |
| 1565026_a_at | OFCC1           | -2,908843709 | -3,037500868 | 0,128657159 |  |
| 1566162_x_at | -               | -2,908843709 | -3,037500868 | 0,128657159 |  |
| 209465_x_at  | LOC100287705 /  | -2,908843709 | -3,037500868 | 0,128657159 |  |
| 216619_at    | GTPBP10         | -2,908843709 | -3,037500868 | 0,128657159 |  |
| 228440_at    | -               | -2,908843709 | -3,037500868 | 0,128657159 |  |
| 231648_at    | -               | -2,908843709 | -3,037500868 | 0,128657159 |  |
| 233845_at    | -               | -2,908843709 | -3,037500868 | 0,128657159 |  |
| 240179_at    | LOC100505801    | -2,908843709 | -3,037500868 | 0,128657159 |  |
| 240747_at    | -               | -2,908843709 | -3,037500868 | 0,128657159 |  |
| 241172_at    | GRIA2           | -2,908843709 | -3,037500868 | 0,128657159 |  |
| 241436_at    | SCNN1G          | -2,908843709 | -3,037500868 | 0,128657159 |  |
| 226453_at    | RNASEH2C        | 2,325288363  | 2,196649505  | 0,128638858 |  |
| 225845_at    | ZBTB44          | 3,539022513  | 3,410394103  | 0,12862841  |  |
| 38149_at     | ARHGAP25        | -0,142235148 | -0,270834454 | 0,128599306 |  |
| 202891_at    | NIT1            | 2,678376417  | 2,549796788  | 0,128579629 |  |
| 225272_at    | SAT2            | 1,129248302  | 1,000684521  | 0,128563781 |  |
| 225377_at    | RABL6           | 1,129248302  | 1,000684521  | 0,128563781 |  |
| 223324_s_at  | TRPM7           | 1,726031811  | 1,59747851   | 0,1285533   |  |
| 238959_at    | LARP4           | 1,726031811  | 1,59747851   | 0,1285533   |  |

|              |                  |              |              |             |  |
|--------------|------------------|--------------|--------------|-------------|--|
| 225306_s_at  | SLC25A29         | 2,232003119  | 2,103505212  | 0,128497907 |  |
| 206163_at    | MAB21L1          | 3,643632572  | 3,515187047  | 0,128445525 |  |
| 215629_s_at  | DLEU2 /// DLEU2  | 2,022468633  | 1,894118818  | 0,128349816 |  |
| 1560498_at   | -                | -1,026571149 | -1,154897679 | 0,12832653  |  |
| 1570191_at   | -                | -1,026571149 | -1,154897679 | 0,12832653  |  |
| 203807_x_at  | CSH2             | -1,026571149 | -1,154897679 | 0,12832653  |  |
| 208377_s_at  | CACNA1F          | -1,026571149 | -1,154897679 | 0,12832653  |  |
| 214365_at    | TPM3             | -1,026571149 | -1,154897679 | 0,12832653  |  |
| 216249_at    | PVT1             | -1,026571149 | -1,154897679 | 0,12832653  |  |
| 232543_x_at  | ARHGAP9          | -1,026571149 | -1,154897679 | 0,12832653  |  |
| 232976_at    | SNORD116-17 //   | -1,026571149 | -1,154897679 | 0,12832653  |  |
| 238420_at    | TAOK1            | -1,026571149 | -1,154897679 | 0,12832653  |  |
| 239401_at    | -                | -1,026571149 | -1,154897679 | 0,12832653  |  |
| 244481_at    | -                | -1,026571149 | -1,154897679 | 0,12832653  |  |
| 208376_at    | CCR4             | 0,682279745  | 0,553993624  | 0,128286121 |  |
| 228231_at    | SNX8             | 0,945567441  | 0,817300337  | 0,128267105 |  |
| 223043_at    | EMC4             | 5,381596876  | 5,253365418  | 0,128231459 |  |
| 205457_at    | C6orf106         | 1,683039483  | 1,55481039   | 0,128229092 |  |
| 239355_at    | GMCL1            | 3,34687727   | 3,218713651  | 0,128163619 |  |
| 218949_s_at  | QRSL1            | 2,986507217  | 2,858346012  | 0,128161205 |  |
| 212370_x_at  | FAM21A /// FAM2  | 3,063308547  | 2,935211251  | 0,128097296 |  |
| 201734_at    | CLCN3            | 4,833365882  | 4,705281859  | 0,128084023 |  |
| 208756_at    | EIF3I            | 6,126938787  | 5,998864294  | 0,128074493 |  |
| 1555751_a_at | GEMIN7           | 3,451082821  | 3,323041804  | 0,128041017 |  |
| 225069_at    | PCYT1A           | 2,908260915  | 2,780243895  | 0,12801702  |  |
| 204235_s_at  | GULP1            | 2,027765132  | 1,899812471  | 0,127952661 |  |
| 1570375_at   | LOC100506585     | -0,221656139 | -0,34958478  | 0,127928642 |  |
| 206287_s_at  | ITIH4 /// MUSTN  | -0,221656139 | -0,34958478  | 0,127928642 |  |
| 213602_s_at  | MMP11            | -0,221656139 | -0,34958478  | 0,127928642 |  |
| 221184_at    | -                | -0,221656139 | -0,34958478  | 0,127928642 |  |
| 228404_at    | IRX2             | -0,221656139 | -0,34958478  | 0,127928642 |  |
| 229762_at    | -                | -0,221656139 | -0,34958478  | 0,127928642 |  |
| 232748_at    | PAPPA            | -0,221656139 | -0,34958478  | 0,127928642 |  |
| 1563638_at   | FAM18A           | 0,480753764  | 0,352836757  | 0,127917006 |  |
| 203750_s_at  | RARA             | 0,480753764  | 0,352836757  | 0,127917006 |  |
| 207006_s_at  | CCDC106          | 0,480753764  | 0,352836757  | 0,127917006 |  |
| 223177_at    | NT5DC1           | 3,335176289  | 3,207279726  | 0,127896563 |  |
| 226353_at    | SPPL2A           | 3,085065712  | 2,957221307  | 0,127844405 |  |
| 202284_s_at  | CDKN1A           | 2,931053371  | 2,803210557  | 0,127842814 |  |
| 206800_at    | MTHFR            | 0,103263601  | -0,024572586 | 0,127836188 |  |
| 212817_at    | DNAJB5           | 0,103263601  | -0,024572586 | 0,127836188 |  |
| 215603_x_at  | GGT1 /// GGT2 // | 0,103263601  | -0,024572586 | 0,127836188 |  |
| 234882_at    | -                | 0,103263601  | -0,024572586 | 0,127836188 |  |
| 235298_at    | WDR27            | 0,103263601  | -0,024572586 | 0,127836188 |  |
| 200888_s_at  | RPL23            | 7,389826452  | 7,262003475  | 0,127822978 |  |
| 1555697_at   | KLK4             | 1,735773781  | 1,60795124   | 0,127822541 |  |
| 54970_at     | ZMIZ2            | 2,588941442  | 2,461119577  | 0,127821865 |  |
| 204244_s_at  | DBF4             | 4,848036436  | 4,720241528  | 0,127794908 |  |
| 203820_s_at  | IGF2BP3          | 3,274090262  | 3,146317015  | 0,127773248 |  |
| 202970_at    | DYRK2            | 1,104397092  | 0,976641161  | 0,127755931 |  |
| 233999_s_at  | TTC26            | 1,104397092  | 0,976641161  | 0,127755931 |  |
| 235119_at    | TAF3             | 1,104397092  | 0,976641161  | 0,127755931 |  |
| 224621_at    | MAPK1            | 4,329411337  | 4,201658983  | 0,127752355 |  |
| 208752_x_at  | NAP1L1           | 6,300667153  | 6,172950708  | 0,127716445 |  |
| 212411_at    | IMP4             | 4,087113308  | 3,959421856  | 0,127691452 |  |
| 226502_at    | ELMOD2           | 2,59162628   | 2,464004877  | 0,127621403 |  |



|              |                 |              |              |             |  |
|--------------|-----------------|--------------|--------------|-------------|--|
| 208093_s_at  | NDEL1           | 3,069741844  | 2,942125533  | 0,127616311 |  |
| 1553587_a_at | POLE4           | 3,964737003  | 3,837157105  | 0,127579898 |  |
| 200776_s_at  | BZW1            | 5,521923587  | 5,3943954    | 0,127528187 |  |
| 225404_at    | C1orf212        | 3,914869478  | 3,787346121  | 0,127523358 |  |
| 1553677_a_at | TIPRL           | 2,59519831   | 2,467842989  | 0,12735532  |  |
| 218578_at    | CDC73           | 2,938102794  | 2,810785576  | 0,127317218 |  |
| 221544_s_at  | MED16           | 0,695652136  | 0,568365095  | 0,127287041 |  |
| 226644_at    | MIB2            | 0,695652136  | 0,568365095  | 0,127287041 |  |
| 228382_at    | FAM105B         | 0,695652136  | 0,568365095  | 0,127287041 |  |
| 54632_at     | THADA           | 2,433006244  | 2,305748082  | 0,127258163 |  |
| 225864_at    | FAM84B          | 1,596577845  | 1,469325098  | 0,127252747 |  |
| 228859_at    | C4orf21         | 1,596577845  | 1,469325098  | 0,127252747 |  |
| 207829_s_at  | BNIP1           | 2,146943689  | 2,019703483  | 0,127240207 |  |
| 203960_s_at  | HSPB11          | 2,721505869  | 2,594367918  | 0,127137951 |  |
| 208990_s_at  | HNRNPH3         | 5,90459196   | 5,777460041  | 0,127131919 |  |
| 217678_at    | SLC7A11         | 2,37600538   | 2,248887791  | 0,127117589 |  |
| 1563302_at   | -               | 0,376672223  | 0,249604176  | 0,127068048 |  |
| 204405_x_at  | DIMT1           | 4,674447146  | 4,547386035  | 0,127061111 |  |
| 229342_at    | C17orf85        | 0,962260738  | 0,835239052  | 0,127021686 |  |
| 238121_at    | GK5             | 1,114389003  | 0,987376598  | 0,127012406 |  |
| 203499_at    | EPHA2           | 1,318332599  | 1,191491281  | 0,126841318 |  |
| 228311_at    | BCL6B           | 1,318332599  | 1,191491281  | 0,126841318 |  |
| 238299_at    | -               | 0,882651021  | 0,755840599  | 0,126810421 |  |
| 227158_at    | C14orf126       | 3,062018438  | 2,935211251  | 0,126807187 |  |
| 217750_s_at  | UBE2Z           | 4,311065622  | 4,18426834   | 0,126797282 |  |
| 214003_x_at  | RPS20 /// SNORI | 8,098027738  | 7,97123216   | 0,126795578 |  |
| 224793_s_at  | TGFBF1          | 3,985300536  | 3,858511405  | 0,126789131 |  |
| 1552276_a_at | VPS18           | 0,255492549  | 0,128747141  | 0,126745409 |  |
| 203932_at    | HLA-DMB         | 0,255492549  | 0,128747141  | 0,126745409 |  |
| 222038_s_at  | UTP18           | 0,255492549  | 0,128747141  | 0,126745409 |  |
| 223410_s_at  | -               | 0,255492549  | 0,128747141  | 0,126745409 |  |
| 229402_at    | SAMD13          | 0,255492549  | 0,128747141  | 0,126745409 |  |
| 241234_at    | LOC100506797    | 0,255492549  | 0,128747141  | 0,126745409 |  |
| 226611_s_at  | CENPV           | 3,904829675  | 3,778101865  | 0,126727811 |  |
| 201688_s_at  | TPD52           | 1,496984567  | 1,370274469  | 0,126710098 |  |
| 1560477_a_at | SAMD11          | -0,033456564 | -0,160136748 | 0,126680184 |  |
| 238259_at    | ADSSL1          | -0,033456564 | -0,160136748 | 0,126680184 |  |
| 240080_at    | -               | -0,033456564 | -0,160136748 | 0,126680184 |  |
| 241930_x_at  | -               | -0,033456564 | -0,160136748 | 0,126680184 |  |
| 228299_at    | KCTD20          | 4,604390697  | 4,477716877  | 0,12667382  |  |
| 1554432_x_at | FAM165B         | 1,751865623  | 1,6252386    | 0,126627022 |  |
| 204587_at    | SLC25A14        | 2,605861638  | 2,479296438  | 0,1265652   |  |
| 226596_x_at  | LOC729852       | 0,606430281  | 0,479907041  | 0,126523241 |  |
| 230976_at    | AK8             | 0,606430281  | 0,479907041  | 0,126523241 |  |
| 235535_x_at  | FRG1 /// FRG1B  | 0,606430281  | 0,479907041  | 0,126523241 |  |
| 1555846_a_at | -               | 1,706348269  | 1,579853228  | 0,126495041 |  |
| 1555429_at   | -               | -0,986356909 | -1,112851844 | 0,126494935 |  |
| 1558785_a_at | RGS5            | -0,986356909 | -1,112851844 | 0,126494935 |  |
| 1560485_at   | HIVEP1          | -0,986356909 | -1,112851844 | 0,126494935 |  |
| 207851_s_at  | INSR            | -0,986356909 | -1,112851844 | 0,126494935 |  |
| 233027_at    | -               | -0,986356909 | -1,112851844 | 0,126494935 |  |
| 234063_at    | -               | -0,986356909 | -1,112851844 | 0,126494935 |  |
| 234637_at    | KRTAP4-5        | -0,986356909 | -1,112851844 | 0,126494935 |  |
| 235854_x_at  | ROCK1           | -0,986356909 | -1,112851844 | 0,126494935 |  |
| 215735_s_at  | TSC2            | 1,191926657  | 1,065442793  | 0,126483864 |  |
| 219083_at    | SHQ1            | 4,226646405  | 4,100219485  | 0,12642692  |  |

|              |                  |              |              |             |  |
|--------------|------------------|--------------|--------------|-------------|--|
| 235132_at    | LOC254128        | 1,844820248  | 1,718396606  | 0,126423642 |  |
| 202496_at    | EDC4             | 2,048758794  | 1,922365006  | 0,126393788 |  |
| 203971_at    | SLC31A1          | 2,755423794  | 2,629059192  | 0,126364601 |  |
| 1553462_at   | -                | -2,972500237 | -3,098858316 | 0,12635808  |  |
| 1556282_at   | FGFR1OP2         | -2,972500237 | -3,098858316 | 0,12635808  |  |
| 1562235_s_at | -                | -2,972500237 | -3,098858316 | 0,12635808  |  |
| 1565834_a_at | -                | -2,972500237 | -3,098858316 | 0,12635808  |  |
| 1567059_at   | -                | -2,972500237 | -3,098858316 | 0,12635808  |  |
| 1567696_at   | -                | -2,972500237 | -3,098858316 | 0,12635808  |  |
| 1569669_at   | FOXR2            | -2,972500237 | -3,098858316 | 0,12635808  |  |
| 204463_s_at  | EDNRA            | -2,972500237 | -3,098858316 | 0,12635808  |  |
| 210738_s_at  | SLC4A4           | -2,972500237 | -3,098858316 | 0,12635808  |  |
| 213458_at    | FAM149B1         | -2,972500237 | -3,098858316 | 0,12635808  |  |
| 215717_s_at  | FBN2             | -2,972500237 | -3,098858316 | 0,12635808  |  |
| 237788_at    | -                | -2,972500237 | -3,098858316 | 0,12635808  |  |
| 239301_at    | -                | -2,972500237 | -3,098858316 | 0,12635808  |  |
| 239349_at    | C1QTNF7          | -2,972500237 | -3,098858316 | 0,12635808  |  |
| 241560_at    | -                | -2,972500237 | -3,098858316 | 0,12635808  |  |
| 243788_at    | -                | -2,972500237 | -3,098858316 | 0,12635808  |  |
| 243998_at    | KRT222           | -2,972500237 | -3,098858316 | 0,12635808  |  |
| 244094_at    | -                | -2,972500237 | -3,098858316 | 0,12635808  |  |
| 226776_at    | ENY2             | 3,010782559  | 2,884425449  | 0,12635711  |  |
| 207992_s_at  | AMPD3            | 2,159061673  | 2,032717854  | 0,126343819 |  |
| 202754_at    | R3HDM1           | 4,372199749  | 4,245917359  | 0,126282389 |  |
| 218831_s_at  | FCGRT            | 2,446911392  | 2,320681318  | 0,126230074 |  |
| 204395_s_at  | GRK5             | 0,503742507  | 0,377530647  | 0,12621186  |  |
| 205211_s_at  | RIN1             | 0,503742507  | 0,377530647  | 0,12621186  |  |
| 211465_x_at  | FUT6             | 0,503742507  | 0,377530647  | 0,12621186  |  |
| 239307_at    | -                | 0,503742507  | 0,377530647  | 0,12621186  |  |
| 203799_at    | CD302 /// LY75-C | 1,326951551  | 1,200746069  | 0,126205481 |  |
| 203437_at    | TMEM11           | 2,993291442  | 2,867091644  | 0,126199798 |  |
| 226316_at    | RBM26            | 3,088871381  | 2,962671751  | 0,12619963  |  |
| 218665_at    | FZD4             | 1,758252436  | 1,632095957  | 0,12615648  |  |
| 228002_at    | GTPBP4 /// IDI2  | 1,758252436  | 1,632095957  | 0,12615648  |  |
| 1553158_at   | CEP19            | -0,196756757 | -0,322870281 | 0,126113524 |  |
| 207834_at    | FBLN1            | -0,196756757 | -0,322870281 | 0,126113524 |  |
| 208344_x_at  | IFNA1 /// IFNA13 | -0,196756757 | -0,322870281 | 0,126113524 |  |
| 211809_x_at  | COL13A1          | -0,196756757 | -0,322870281 | 0,126113524 |  |
| 213159_at    | PCNX             | -0,196756757 | -0,322870281 | 0,126113524 |  |
| 224169_at    | NPFFR2           | -0,196756757 | -0,322870281 | 0,126113524 |  |
| 239265_at    | SLC35G1          | -0,196756757 | -0,322870281 | 0,126113524 |  |
| 244182_at    | -                | -0,196756757 | -0,322870281 | 0,126113524 |  |
| 222206_s_at  | NCLN             | 2,197169074  | 2,071071048  | 0,126098027 |  |
| 1554918_a_at | ABCC4            | 3,359534664  | 3,233443554  | 0,12609111  |  |
| 212828_at    | SYNJ2            | 2,688444421  | 2,562416132  | 0,126028289 |  |
| 202839_s_at  | NDUFB7           | 4,919943867  | 4,79394496   | 0,125998908 |  |
| 1559942_at   | MDFIC            | 1,614289682  | 1,488344553  | 0,125945129 |  |
| 229553_at    | PGM2L1           | 2,807162789  | 2,681234383  | 0,125928406 |  |
| 225354_s_at  | SH3BGR2          | 2,535098095  | 2,409170778  | 0,125927317 |  |
| 47069_at     | PRR5             | 1,957345899  | 1,831449458  | 0,125896441 |  |
| 38703_at     | DNPEP            | 3,910933598  | 3,785040604  | 0,125892995 |  |
| 217871_s_at  | MIF              | 6,815502549  | 6,689618984  | 0,125883565 |  |
| 1564207_at   | FLJ35390         | 2,422991296  | 2,297144887  | 0,12584641  |  |
| 1553789_a_at | C21orf58         | 0,715481152  | 0,589657387  | 0,125823765 |  |
| 1562403_a_at | SLC8A3           | 0,715481152  | 0,589657387  | 0,125823765 |  |
| 211373_s_at  | PSEN2            | 0,715481152  | 0,589657387  | 0,125823765 |  |

|              |                  |              |              |             |  |
|--------------|------------------|--------------|--------------|-------------|--|
| 226633_at    | RAB8B            | 5,075404701  | 4,949582959  | 0,125821743 |  |
| 212428_at    | KIAA0368         | 2,896728217  | 2,770953871  | 0,125774345 |  |
| 226031_at    | CCDC132          | 3,482282213  | 3,356551164  | 0,125731049 |  |
| 202776_at    | DNTTIP2          | 4,725862305  | 4,600140481  | 0,125721824 |  |
| 228745_at    | SGTB             | 2,333865983  | 2,208167653  | 0,12569833  |  |
| 201535_at    | UBL3             | 2,132266459  | 2,006570641  | 0,125695818 |  |
| 242546_at    | FLJ39632 /// LOC | 1,269985355  | 1,144305291  | 0,125680064 |  |
| 225610_at    | UHRF2            | 2,693452197  | 2,567790814  | 0,125661383 |  |
| 1554382_at   | LOC200261        | 0,133056859  | 0,007421914  | 0,125634945 |  |
| 233475_at    | MGC32805         | 0,133056859  | 0,007421914  | 0,125634945 |  |
| 229333_at    | -                | 1,81142822   | 1,685812099  | 0,12561612  |  |
| 1565269_s_at | ATF1             | 2,790121796  | 2,664608955  | 0,125512841 |  |
| 228711_at    | ZNF37A           | 1,567778694  | 1,442269454  | 0,12550924  |  |
| 221534_at    | C11orf68         | 2,456762221  | 2,331254065  | 0,125508156 |  |
| 228053_s_at  | TOMM5            | 5,482445879  | 5,356985528  | 0,125460352 |  |
| 1568983_a_at | -                | 3,042527069  | 2,917077481  | 0,125449589 |  |
| 218988_at    | SLC35E3          | 2,983784569  | 2,858346012  | 0,125438557 |  |
| 212034_s_at  | EXOC7            | 2,696781084  | 2,571362843  | 0,12541824  |  |
| 212129_at    | NIPA2            | 4,94360513   | 4,818200317  | 0,125404813 |  |
| 217908_s_at  | DCAF6            | 4,83676466   | 4,711365298  | 0,125399362 |  |
| 205281_s_at  | PIGA             | 3,50144467   | 3,376085218  | 0,125359452 |  |
| 213655_at    | -                | 5,902791466  | 5,777460041  | 0,125331425 |  |
| 227181_at    | LNP1             | 1,859746653  | 1,73441697   | 0,125329683 |  |
| 202557_at    | HSPA13           | 3,838564178  | 3,713295978  | 0,1252682   |  |
| 227974_at    | -                | 1,339784194  | 1,214517879  | 0,125266316 |  |
| 239363_at    | -                | 1,339784194  | 1,214517879  | 0,125266316 |  |
| 238622_at    | RAP2B            | 2,208874124  | 2,083632167  | 0,125241957 |  |
| 200718_s_at  | SKP1             | 7,109811822  | 6,984595957  | 0,125215865 |  |
| 211963_s_at  | ARPC5            | 5,144381006  | 5,019240565  | 0,125140441 |  |
| 242317_at    | HIGD1A           | 1,462198073  | 1,337086025  | 0,125112049 |  |
| 211417_x_at  | GGT1 /// GGT2 // | 0,518867317  | 0,393761504  | 0,125105813 |  |
| 218972_at    | TTC17            | 0,518867317  | 0,393761504  | 0,125105813 |  |
| 219172_at    | UBTD1            | 0,518867317  | 0,393761504  | 0,125105813 |  |
| 233110_s_at  | BCL2L12          | 3,818840142  | 3,693764321  | 0,125075821 |  |
| 202568_s_at  | MARK3            | 3,462861802  | 3,337798009  | 0,125063793 |  |
| 203553_s_at  | MAP4K5           | 3,067171967  | 2,942125533  | 0,125046434 |  |
| 219481_at    | TTC13            | 2,819431021  | 2,694398145  | 0,125032876 |  |
| 223526_at    | C18orf21         | 3,177319542  | 3,052311115  | 0,125008427 |  |
| 1552661_at   | PCDHGB7          | -3,013665402 | -3,138626879 | 0,124961477 |  |
| 1557883_a_at | -                | -3,013665402 | -3,138626879 | 0,124961477 |  |
| 1560048_at   | -                | -3,013665402 | -3,138626879 | 0,124961477 |  |
| 1560111_at   | -                | -3,013665402 | -3,138626879 | 0,124961477 |  |
| 1563696_at   | HSD17B4          | -3,013665402 | -3,138626879 | 0,124961477 |  |
| 1567380_at   | -                | -3,013665402 | -3,138626879 | 0,124961477 |  |
| 1569941_at   | -                | -3,013665402 | -3,138626879 | 0,124961477 |  |
| 1569981_at   | -                | -3,013665402 | -3,138626879 | 0,124961477 |  |
| 1570469_at   | -                | -3,013665402 | -3,138626879 | 0,124961477 |  |
| 210643_at    | TNFSF11          | -3,013665402 | -3,138626879 | 0,124961477 |  |
| 211119_at    | ESR2             | -3,013665402 | -3,138626879 | 0,124961477 |  |
| 213172_at    | TTC9             | -3,013665402 | -3,138626879 | 0,124961477 |  |
| 215619_at    | -                | -3,013665402 | -3,138626879 | 0,124961477 |  |
| 216068_at    | -                | -3,013665402 | -3,138626879 | 0,124961477 |  |
| 231898_x_at  | SOX2-OT          | -3,013665402 | -3,138626879 | 0,124961477 |  |
| 233942_at    | LOC613126        | -3,013665402 | -3,138626879 | 0,124961477 |  |
| 237690_at    | GPR115           | -3,013665402 | -3,138626879 | 0,124961477 |  |
| 240713_s_at  | -                | -3,013665402 | -3,138626879 | 0,124961477 |  |

|              |                  |              |              |             |  |
|--------------|------------------|--------------|--------------|-------------|--|
| 241782_at    | NEBL             | -3,013665402 | -3,138626879 | 0,124961477 |  |
| 243165_at    | BTF3             | -3,013665402 | -3,138626879 | 0,124961477 |  |
| 243605_at    | -                | -3,013665402 | -3,138626879 | 0,124961477 |  |
| 243878_at    | -                | -3,013665402 | -3,138626879 | 0,124961477 |  |
| 208776_at    | PSMD11           | 2,247975581  | 2,123108223  | 0,124867358 |  |
| 211702_s_at  | USP32            | 2,577249059  | 2,452428893  | 0,124820165 |  |
| 227374_at    | EARS2            | 2,14450783   | 2,019703483  | 0,124804347 |  |
| 1556015_a_at | MESP2            | 1,215326747  | 1,090553537  | 0,12477321  |  |
| 235154_at    | TAF3             | 1,215326747  | 1,090553537  | 0,12477321  |  |
| 200983_x_at  | CD59             | 4,631170853  | 4,506456081  | 0,124714773 |  |
| 204522_at    | DOM3Z            | 0,911589958  | 0,786897721  | 0,124692237 |  |
| 202354_s_at  | GTF2F1           | 2,28383338   | 2,159161028  | 0,124672352 |  |
| 232553_at    | PCYT1B           | 1,732533761  | 1,60795124   | 0,124582521 |  |
| 65521_at     | UBE2D4           | 1,870104004  | 1,745526308  | 0,124577696 |  |
| 205300_s_at  | SNRNP35          | 1,073999308  | 0,949447784  | 0,124551524 |  |
| 216486_x_at  | ZNF79            | 1,073999308  | 0,949447784  | 0,124551524 |  |
| 230083_at    | USP53            | 1,073999308  | 0,949447784  | 0,124551524 |  |
| 202933_s_at  | YES1             | 4,540517622  | 4,41598058   | 0,124537042 |  |
| 209458_x_at  | HBA1 /// HBA2    | 5,384696241  | 5,260159446  | 0,124536794 |  |
| 209408_at    | KIF2C            | 4,32026764   | 4,195885363  | 0,124382278 |  |
| 31637_s_at   | NR1D1 /// THRA   | 2,271607525  | 2,147243253  | 0,124364272 |  |
| 231865_at    | NCKAP5L          | 0,82905153   | 0,704715219  | 0,124336311 |  |
| 226524_at    | C3orf38          | 3,115233629  | 2,990953566  | 0,124280063 |  |
| 1560878_at   | SYT15            | 1,874520207  | 1,750261389  | 0,124258818 |  |
| 207105_s_at  | PIK3R2           | 0,152582607  | 0,028364014  | 0,124218593 |  |
| 239452_at    | -                | 0,152582607  | 0,028364014  | 0,124218593 |  |
| 214943_s_at  | ARID4B /// RBM3  | 1,960118853  | 1,835911187  | 0,124207667 |  |
| 242356_at    | VTI1A            | 1,58584542   | 1,461646549  | 0,124198871 |  |
| 1553750_a_at | FAM76B           | -0,366776884 | -0,490927335 | 0,124150451 |  |
| 205555_s_at  | MSX2             | -0,366776884 | -0,490927335 | 0,124150451 |  |
| 207255_at    | LEPR             | -0,366776884 | -0,490927335 | 0,124150451 |  |
| 211266_s_at  | GPR4             | -0,366776884 | -0,490927335 | 0,124150451 |  |
| 228279_s_at  | -                | -0,366776884 | -0,490927335 | 0,124150451 |  |
| 232211_at    | PPP1R3F          | -0,366776884 | -0,490927335 | 0,124150451 |  |
| 233422_at    | -                | -0,366776884 | -0,490927335 | 0,124150451 |  |
| 239599_at    | -                | -0,366776884 | -0,490927335 | 0,124150451 |  |
| 242503_at    | CHST13           | -0,366776884 | -0,490927335 | 0,124150451 |  |
| 244202_at    | -                | -0,366776884 | -0,490927335 | 0,124150451 |  |
| 244890_at    | -                | -0,366776884 | -0,490927335 | 0,124150451 |  |
| 202470_s_at  | CPSF6            | 1,153678675  | 1,029536893  | 0,124141782 |  |
| 209067_s_at  | HNRPD            | 5,820687187  | 5,696563542  | 0,124123645 |  |
| 207020_at    | HSF2BP           | 0,417596971  | 0,293518836  | 0,124078135 |  |
| 216069_at    | PRMT2            | 0,417596971  | 0,293518836  | 0,124078135 |  |
| 229437_at    | MIR155 /// MIR15 | 0,417596971  | 0,293518836  | 0,124078135 |  |
| 40560_at     | TBX2             | 0,920159643  | 0,796085967  | 0,124073677 |  |
| 236026_at    | GPATCH2          | 1,292162421  | 1,16809119   | 0,12407123  |  |
| 203919_at    | TCEA2            | 2,259277178  | 2,135226207  | 0,12405097  |  |
| 232218_at    | -                | 2,259277178  | 2,135226207  | 0,12405097  |  |
| 219329_s_at  | C2orf28          | 4,407166241  | 4,283151707  | 0,124014533 |  |
| 220310_at    | TUBAL3           | 0,641402394  | 0,51742585   | 0,123976544 |  |
| 211097_s_at  | PBX2             | 1,534677255  | 1,410714371  | 0,123962884 |  |
| 213750_at    | RSL1D1           | 2,227406889  | 2,103505212  | 0,123901676 |  |
| 223501_at    | TNFSF13B         | 2,227406889  | 2,103505212  | 0,123901676 |  |
| 200896_x_at  | HDGF             | 4,868844325  | 4,74496648   | 0,123877845 |  |
| 225180_at    | TTC14            | 1,965648824  | 1,841838775  | 0,12381005  |  |
| 242263_at    | TMED5            | 1,965648824  | 1,841838775  | 0,12381005  |  |

|              |                 |              |              |             |  |
|--------------|-----------------|--------------|--------------|-------------|--|
| 223174_at    | BTBD10          | 2,945117939  | 2,821324225  | 0,123793714 |  |
| 221779_at    | MICALL1         | 1,481627361  | 1,3579181    | 0,123709261 |  |
| 31845_at     | ELF4            | 1,394109935  | 1,270526026  | 0,123583909 |  |
| 217927_at    | SPCS1           | 6,038200748  | 5,914633633  | 0,123567115 |  |
| 1563620_at   | BTRC            | -3,054236653 | -3,177802286 | 0,123565633 |  |
| 216087_at    | -               | -3,054236653 | -3,177802286 | 0,123565633 |  |
| 220884_at    | -               | -3,054236653 | -3,177802286 | 0,123565633 |  |
| 243028_x_at  | -               | -3,054236653 | -3,177802286 | 0,123565633 |  |
| 212877_at    | KLC1            | 2,331726354  | 2,208167653  | 0,123558702 |  |
| 1558738_at   | NOL3            | -0,926850548 | -1,050406615 | 0,123556067 |  |
| 1562267_s_at | ZNF709          | -0,926850548 | -1,050406615 | 0,123556067 |  |
| 204421_s_at  | FGF2            | -0,926850548 | -1,050406615 | 0,123556067 |  |
| 206012_at    | LEFTY2          | -0,926850548 | -1,050406615 | 0,123556067 |  |
| 207548_at    | GRM7            | -0,926850548 | -1,050406615 | 0,123556067 |  |
| 209013_x_at  | TRIO            | -0,926850548 | -1,050406615 | 0,123556067 |  |
| 209500_x_at  | TNFSF12 /// TNF | -0,926850548 | -1,050406615 | 0,123556067 |  |
| 213319_s_at  | CSDA            | -0,926850548 | -1,050406615 | 0,123556067 |  |
| 216430_x_at  | IGLV1-44        | -0,926850548 | -1,050406615 | 0,123556067 |  |
| 216918_s_at  | DST /// LOC1006 | -0,926850548 | -1,050406615 | 0,123556067 |  |
| 220337_at    | NGB             | -0,926850548 | -1,050406615 | 0,123556067 |  |
| 221680_s_at  | ETV7            | -0,926850548 | -1,050406615 | 0,123556067 |  |
| 223657_at    | FAM167B         | -0,926850548 | -1,050406615 | 0,123556067 |  |
| 231982_at    | C19orf77        | -0,926850548 | -1,050406615 | 0,123556067 |  |
| 232133_at    | ADAMTS10        | -0,926850548 | -1,050406615 | 0,123556067 |  |
| 238400_at    | ENDOV           | -0,926850548 | -1,050406615 | 0,123556067 |  |
| 240200_at    | SULT1C2         | -0,926850548 | -1,050406615 | 0,123556067 |  |
| 240500_at    | -               | -0,926850548 | -1,050406615 | 0,123556067 |  |
| 244461_at    | SPECC1          | -0,926850548 | -1,050406615 | 0,123556067 |  |
| 224068_x_at  | RBM22           | 3,540875956  | 3,417357537  | 0,123518419 |  |
| 204169_at    | IMPDH1          | 2,817903185  | 2,694398145  | 0,12350504  |  |
| 206412_at    | FER             | 0,541261317  | 0,417770464  | 0,123490853 |  |
| 211965_at    | ZFP36L1         | 0,541261317  | 0,417770464  | 0,123490853 |  |
| 222349_x_at  | RNF126P1        | 0,541261317  | 0,417770464  | 0,123490853 |  |
| 222566_at    | SUV420H1        | 0,541261317  | 0,417770464  | 0,123490853 |  |
| 232312_at    | PPP6R3          | 0,541261317  | 0,417770464  | 0,123490853 |  |
| 238740_at    | AARSD1 /// PTG  | 0,541261317  | 0,417770464  | 0,123490853 |  |
| 233852_at    | POLH            | 0,928678725  | 0,805216064  | 0,123462661 |  |
| 235753_at    | HOXA7           | 0,928678725  | 0,805216064  | 0,123462661 |  |
| 227372_s_at  | BAIAP2L1        | 1,649074067  | 1,525647381  | 0,123426686 |  |
| 1554930_a_at | FUT8            | 2,365585359  | 2,242180416  | 0,123404943 |  |
| 201132_at    | HNRNPH2 /// RP  | 4,301804532  | 4,17842456   | 0,123379973 |  |
| 220651_s_at  | MCM10           | 4,192860462  | 4,06960609   | 0,123254372 |  |
| 229468_at    | CDK3 /// TEN1-C | 1,889144008  | 1,765933685  | 0,123210323 |  |
| 237563_s_at  | -               | 1,889144008  | 1,765933685  | 0,123210323 |  |
| 212453_at    | KIAA1279        | 2,845159691  | 2,721978587  | 0,123181105 |  |
| 226503_at    | RIF1            | 2,652894659  | 2,529740643  | 0,123154016 |  |
| 212873_at    | HMHA1           | 1,369290453  | 1,246149888  | 0,123140564 |  |
| 213986_s_at  | C19orf6         | 1,238353345  | 1,115234684  | 0,123118661 |  |
| 217961_at    | SLC25A38        | 2,933877275  | 2,810785576  | 0,123091699 |  |
| 201532_at    | PSMA3           | 6,354482896  | 6,231410697  | 0,123072199 |  |
| 1554239_s_at | ZADH2           | 2,017152618  | 1,894118818  | 0,123033801 |  |
| 209969_s_at  | STAT1           | 3,602516743  | 3,479511525  | 0,123005218 |  |
| 225887_at    | PROSER1         | 3,562021138  | 3,439026336  | 0,122994803 |  |
| 225284_at    | DNAJC3          | 3,32445605   | 3,201528602  | 0,122927448 |  |
| 1554899_s_at | FCER1G          | -1,964176657 | -2,086984744 | 0,122808087 |  |
| 1558888_x_at | ZNF321P /// ZNF | -1,964176657 | -2,086984744 | 0,122808087 |  |

|              |                |              |              |             |  |
|--------------|----------------|--------------|--------------|-------------|--|
| 1560411_at   | -              | -1,964176657 | -2,086984744 | 0,122808087 |  |
| 1560940_at   | SACS-AS1       | -1,964176657 | -2,086984744 | 0,122808087 |  |
| 1561232_at   | LOC100270680   | -1,964176657 | -2,086984744 | 0,122808087 |  |
| 1564472_at   | -              | -1,964176657 | -2,086984744 | 0,122808087 |  |
| 1569203_at   | CXCL2          | -1,964176657 | -2,086984744 | 0,122808087 |  |
| 202438_x_at  | IDS            | -1,964176657 | -2,086984744 | 0,122808087 |  |
| 204971_at    | CSTA           | -1,964176657 | -2,086984744 | 0,122808087 |  |
| 205485_at    | RYR1           | -1,964176657 | -2,086984744 | 0,122808087 |  |
| 205525_at    | CALD1          | -1,964176657 | -2,086984744 | 0,122808087 |  |
| 210032_s_at  | SPAG6          | -1,964176657 | -2,086984744 | 0,122808087 |  |
| 217163_at    | ESR1           | -1,964176657 | -2,086984744 | 0,122808087 |  |
| 217478_s_at  | HLA-DMA        | -1,964176657 | -2,086984744 | 0,122808087 |  |
| 221137_at    | -              | -1,964176657 | -2,086984744 | 0,122808087 |  |
| 228781_at    | OBFC1          | -1,964176657 | -2,086984744 | 0,122808087 |  |
| 232289_at    | KCNJ12         | -1,964176657 | -2,086984744 | 0,122808087 |  |
| 232696_at    | -              | -1,964176657 | -2,086984744 | 0,122808087 |  |
| 232994_s_at  | RGNEF          | -1,964176657 | -2,086984744 | 0,122808087 |  |
| 233577_at    | -              | -1,964176657 | -2,086984744 | 0,122808087 |  |
| 234408_at    | IL17F          | -1,964176657 | -2,086984744 | 0,122808087 |  |
| 234772_s_at  | KRTAP2-2       | -1,964176657 | -2,086984744 | 0,122808087 |  |
| 235709_at    | GAS2L3         | -1,964176657 | -2,086984744 | 0,122808087 |  |
| 239537_at    | ST8SIA2        | -1,964176657 | -2,086984744 | 0,122808087 |  |
| 241329_s_at  | -              | -1,964176657 | -2,086984744 | 0,122808087 |  |
| 242937_at    | FOXK2          | -1,964176657 | -2,086984744 | 0,122808087 |  |
| 203209_at    | RFC5           | 3,136227209  | 3,013449121  | 0,122778088 |  |
| 1554248_at   | ZNF638         | 0,020670649  | -0,102100538 | 0,122771187 |  |
| 206250_x_at  | AVPR1A         | 0,020670649  | -0,102100538 | 0,122771187 |  |
| 212257_s_at  | SMARCA2        | 0,020670649  | -0,102100538 | 0,122771187 |  |
| 213261_at    | TRANK1         | 0,020670649  | -0,102100538 | 0,122771187 |  |
| 238130_at    | NFATC2IP       | 0,020670649  | -0,102100538 | 0,122771187 |  |
| 241237_at    | -              | 0,020670649  | -0,102100538 | 0,122771187 |  |
| 212907_at    | SLC30A1        | 3,421207626  | 3,298466943  | 0,122740683 |  |
| 1553809_a_at | C9orf71        | -1,838812296 | -1,961547147 | 0,122734851 |  |
| 1560010_a_at | SATB2-AS1      | -1,838812296 | -1,961547147 | 0,122734851 |  |
| 1561128_at   | -              | -1,838812296 | -1,961547147 | 0,122734851 |  |
| 1563031_at   | -              | -1,838812296 | -1,961547147 | 0,122734851 |  |
| 203700_s_at  | DIO2           | -1,838812296 | -1,961547147 | 0,122734851 |  |
| 207393_at    | HCRTR2         | -1,838812296 | -1,961547147 | 0,122734851 |  |
| 213797_at    | RSAD2          | -1,838812296 | -1,961547147 | 0,122734851 |  |
| 221052_at    | TDRKH          | -1,838812296 | -1,961547147 | 0,122734851 |  |
| 222049_s_at  | RBP4           | -1,838812296 | -1,961547147 | 0,122734851 |  |
| 222888_at    | CCNJ           | -1,838812296 | -1,961547147 | 0,122734851 |  |
| 223732_at    | SLC23A1        | -1,838812296 | -1,961547147 | 0,122734851 |  |
| 227108_at    | STARD9         | -1,838812296 | -1,961547147 | 0,122734851 |  |
| 229781_at    | LOC100506725   | -1,838812296 | -1,961547147 | 0,122734851 |  |
| 231167_at    | -              | -1,838812296 | -1,961547147 | 0,122734851 |  |
| 231606_at    | -              | -1,838812296 | -1,961547147 | 0,122734851 |  |
| 233157_x_at  | CCDC114        | -1,838812296 | -1,961547147 | 0,122734851 |  |
| 233865_at    | NPAS3          | -1,838812296 | -1,961547147 | 0,122734851 |  |
| 234532_at    | -              | -1,838812296 | -1,961547147 | 0,122734851 |  |
| 234913_at    | TTY4 /// TTTY4 | -1,838812296 | -1,961547147 | 0,122734851 |  |
| 235995_at    | PUM2           | -1,838812296 | -1,961547147 | 0,122734851 |  |
| 236938_at    | -              | -1,838812296 | -1,961547147 | 0,122734851 |  |
| 237633_at    | -              | -1,838812296 | -1,961547147 | 0,122734851 |  |
| 238730_at    | ARHGEF11       | -1,838812296 | -1,961547147 | 0,122734851 |  |
| 241250_at    | -              | -1,838812296 | -1,961547147 | 0,122734851 |  |

|              |                 |              |              |             |  |
|--------------|-----------------|--------------|--------------|-------------|--|
| 242662_at    | PCSK6           | -1,838812296 | -1,961547147 | 0,122734851 |  |
| 244194_at    | ADAM22          | -1,838812296 | -1,961547147 | 0,122734851 |  |
| 227607_at    | STAMBPL1        | 1,659347917  | 1,536652708  | 0,122695209 |  |
| 223020_at    | CLPTM1L         | 5,109524703  | 4,986839697  | 0,122685006 |  |
| 221597_s_at  | TMEM208         | 3,722507547  | 3,599822964  | 0,122684583 |  |
| 58696_at     | EXOSC4          | 4,5960582    | 4,473427782  | 0,122630418 |  |
| 218698_at    | APIP            | 3,807337009  | 3,684723168  | 0,122613841 |  |
| 227913_at    | EXOSC3          | 0,760715727  | 0,638150376  | 0,12256535  |  |
| 228698_at    | SOX7            | 4,582512819  | 4,460001797  | 0,122511022 |  |
| 224949_at    | YIPF5           | 3,102740237  | 2,980244813  | 0,122495425 |  |
| 1552306_at   | ALG10           | 0,555999837  | 0,433557298  | 0,122442539 |  |
| 203860_at    | PCCA            | 1,177702228  | 1,055274826  | 0,122427402 |  |
| 223151_at    | DCUN1D5         | 5,713842013  | 5,591420757  | 0,122421257 |  |
| 221540_x_at  | GTF2H2 /// GTF2 | 3,085065712  | 2,962671751  | 0,122393961 |  |
| 213476_x_at  | TUBB3           | 5,670056013  | 5,547664017  | 0,122391996 |  |
| 229097_at    | DIAPH3          | 3,954344268  | 3,831954914  | 0,122389354 |  |
| 1553364_at   | PNPLA1          | -2,089474779 | -2,211750327 | 0,122275548 |  |
| 1555022_at   | RGS12           | -2,089474779 | -2,211750327 | 0,122275548 |  |
| 1557637_at   | -               | -2,089474779 | -2,211750327 | 0,122275548 |  |
| 1558968_at   | -               | -2,089474779 | -2,211750327 | 0,122275548 |  |
| 1561092_at   | -               | -2,089474779 | -2,211750327 | 0,122275548 |  |
| 1561906_at   | -               | -2,089474779 | -2,211750327 | 0,122275548 |  |
| 1561963_at   | MIR4296         | -2,089474779 | -2,211750327 | 0,122275548 |  |
| 1565795_at   | DUOX1           | -2,089474779 | -2,211750327 | 0,122275548 |  |
| 1565830_at   | -               | -2,089474779 | -2,211750327 | 0,122275548 |  |
| 1565838_at   | -               | -2,089474779 | -2,211750327 | 0,122275548 |  |
| 1566142_at   | -               | -2,089474779 | -2,211750327 | 0,122275548 |  |
| 1569596_at   | -               | -2,089474779 | -2,211750327 | 0,122275548 |  |
| 1570541_s_at | -               | -2,089474779 | -2,211750327 | 0,122275548 |  |
| 207963_at    | KIF25-AS1       | -2,089474779 | -2,211750327 | 0,122275548 |  |
| 208589_at    | TRPC7           | -2,089474779 | -2,211750327 | 0,122275548 |  |
| 211463_at    | ZIC4            | -2,089474779 | -2,211750327 | 0,122275548 |  |
| 213880_at    | LGR5            | -2,089474779 | -2,211750327 | 0,122275548 |  |
| 215225_s_at  | GPR17           | -2,089474779 | -2,211750327 | 0,122275548 |  |
| 215472_at    | PACRG           | -2,089474779 | -2,211750327 | 0,122275548 |  |
| 223620_at    | GPR34           | -2,089474779 | -2,211750327 | 0,122275548 |  |
| 228425_at    | LOC654433       | -2,089474779 | -2,211750327 | 0,122275548 |  |
| 229975_at    | BMPR1B          | -2,089474779 | -2,211750327 | 0,122275548 |  |
| 235895_at    | -               | -2,089474779 | -2,211750327 | 0,122275548 |  |
| 237671_at    | -               | -2,089474779 | -2,211750327 | 0,122275548 |  |
| 238308_at    | LOC100652798 /  | -2,089474779 | -2,211750327 | 0,122275548 |  |
| 240426_at    | FAM47B          | -2,089474779 | -2,211750327 | 0,122275548 |  |
| 240611_at    | -               | -2,089474779 | -2,211750327 | 0,122275548 |  |
| 241591_at    | -               | -2,089474779 | -2,211750327 | 0,122275548 |  |
| 242232_at    | -               | -2,089474779 | -2,211750327 | 0,122275548 |  |
| 242347_at    | -               | -2,089474779 | -2,211750327 | 0,122275548 |  |
| 218151_x_at  | SLC52A2         | 3,63931383   | 3,517040489  | 0,122273341 |  |
| 211512_s_at  | OGFR            | 1,381753566  | 1,259496994  | 0,122256572 |  |
| 227549_x_at  | ZDHHC24         | 1,381753566  | 1,259496994  | 0,122256572 |  |
| 209301_at    | CA2             | 5,783402046  | 5,661173565  | 0,122228482 |  |
| 241687_at    | -               | 0,859074518  | 0,73688026   | 0,122194258 |  |
| 224660_at    | PIGY            | 6,031624929  | 5,909439342  | 0,122185587 |  |
| 214149_s_at  | LOC100652765    | 1,903621061  | 1,781437557  | 0,122183504 |  |
| 228999_at    | CHD2            | 1,903621061  | 1,781437557  | 0,122183504 |  |
| 224465_s_at  | WIBG            | 2,790121796  | 2,667949403  | 0,122172393 |  |
| 220500_s_at  | RABL2A /// RABL | 0,181384709  | 0,059218869  | 0,122165841 |  |

|              |                 |              |              |             |  |
|--------------|-----------------|--------------|--------------|-------------|--|
| 223923_at    | C21orf62        | 0,181384709  | 0,059218869  | 0,122165841 |  |
| 239998_at    | C10orf53        | 0,181384709  | 0,059218869  | 0,122165841 |  |
| 209112_at    | CDKN1B          | 3,234554895  | 3,112391743  | 0,122163152 |  |
| 210074_at    | CTSL2           | 2,742596529  | 2,620464265  | 0,122132263 |  |
| 225576_at    | C6orf72         | 3,431234921  | 3,309203139  | 0,122031782 |  |
| 221822_at    | CCDC101         | 1,446464021  | 1,324440845  | 0,122023175 |  |
| 200056_s_at  | C1D             | 4,423834624  | 4,301817835  | 0,122016789 |  |
| 218056_at    | BFAR            | 3,27186005   | 3,149904996  | 0,121955054 |  |
| 201342_at    | SNRPC           | 5,90495179   | 5,783054676  | 0,121897114 |  |
| 210153_s_at  | ME2             | 3,591828571  | 3,469974737  | 0,121853835 |  |
| 218197_s_at  | OXR1            | 2,794789337  | 2,672945617  | 0,12184372  |  |
| 1556172_at   | -               | -0,136301282 | -0,258114234 | 0,121812952 |  |
| 211486_s_at  | KCNQ2           | -0,136301282 | -0,258114234 | 0,121812952 |  |
| 216344_at    | NPHP4           | -0,136301282 | -0,258114234 | 0,121812952 |  |
| 220910_at    | FRAS1           | -0,136301282 | -0,258114234 | 0,121812952 |  |
| 224732_at    | CHTF8           | 4,065387235  | 3,943660335  | 0,121726899 |  |
| 206136_at    | FZD5            | -0,888496123 | -1,010192375 | 0,121696253 |  |
| 216627_s_at  | B4GALT1         | -0,888496123 | -1,010192375 | 0,121696253 |  |
| 221674_s_at  | CHRD            | -0,888496123 | -1,010192375 | 0,121696253 |  |
| 221679_s_at  | ABHD6           | -0,888496123 | -1,010192375 | 0,121696253 |  |
| 225500_x_at  | SCAF1           | -0,888496123 | -1,010192375 | 0,121696253 |  |
| 231463_at    | CNTD1           | -0,888496123 | -1,010192375 | 0,121696253 |  |
| 231602_at    | LOC100506231    | -0,888496123 | -1,010192375 | 0,121696253 |  |
| 233368_s_at  | DNAJC27         | -0,888496123 | -1,010192375 | 0,121696253 |  |
| 236330_at    | -               | -0,888496123 | -1,010192375 | 0,121696253 |  |
| 238648_at    | -               | -0,888496123 | -1,010192375 | 0,121696253 |  |
| 244865_at    | HAX1            | -0,888496123 | -1,010192375 | 0,121696253 |  |
| 215482_s_at  | EIF2B4          | 3,899783451  | 3,778101865  | 0,121681587 |  |
| 223466_x_at  | COL4A3BP        | 1,995690482  | 1,874012195  | 0,121678288 |  |
| 226762_at    | PURB            | 3,358484112  | 3,236821511  | 0,121662602 |  |
| 218506_x_at  | GLYR1           | 3,056846434  | 2,935211251  | 0,121635183 |  |
| 200894_s_at  | FKBP4           | 4,539590968  | 4,417965868  | 0,121625101 |  |
| 223081_at    | PHF23           | 3,844579258  | 3,722963534  | 0,121615724 |  |
| 212157_at    | SDC2            | 1,512180019  | 1,390636111  | 0,121543908 |  |
| 1565951_s_at | CHML            | 0,95671774   | 0,835239052  | 0,121478688 |  |
| 202907_s_at  | NBN             | 4,506303097  | 4,384854065  | 0,121449032 |  |
| 202964_s_at  | RFX5            | 1,394109935  | 1,272721751  | 0,121388185 |  |
| 218642_s_at  | CHCHD7          | 2,544366685  | 2,423075926  | 0,12129076  |  |
| 224373_s_at  | ND4             | 8,066770579  | 7,945484878  | 0,121285701 |  |
| 1557849_at   | -               | -3,114791413 | -3,236070201 | 0,121278788 |  |
| 1558388_a_at | UG0898H09       | -3,114791413 | -3,236070201 | 0,121278788 |  |
| 1564015_at   | PIEZO2          | -3,114791413 | -3,236070201 | 0,121278788 |  |
| 1568871_at   | -               | -3,114791413 | -3,236070201 | 0,121278788 |  |
| 1569873_at   | LIPJ            | -3,114791413 | -3,236070201 | 0,121278788 |  |
| 203991_s_at  | KDM6A           | -3,114791413 | -3,236070201 | 0,121278788 |  |
| 206504_at    | CYP24A1         | -3,114791413 | -3,236070201 | 0,121278788 |  |
| 208175_s_at  | DMP1            | -3,114791413 | -3,236070201 | 0,121278788 |  |
| 212915_at    | PDZRN3          | -3,114791413 | -3,236070201 | 0,121278788 |  |
| 230760_at    | ZFY             | -3,114791413 | -3,236070201 | 0,121278788 |  |
| 244163_at    | SEMA3A          | -3,114791413 | -3,236070201 | 0,121278788 |  |
| 212137_at    | LARP1           | 5,686056242  | 5,5647888    | 0,121267441 |  |
| 213681_at    | CYHR1           | 0,457392764  | 0,336136178  | 0,121256587 |  |
| 232291_at    | MIR17HG /// MIR | 0,457392764  | 0,336136178  | 0,121256587 |  |
| 1553603_s_at | ATL2            | 0,779676066  | 0,658444279  | 0,121231786 |  |
| 203909_at    | SLC9A6          | 2,827046023  | 2,705818724  | 0,1212273   |  |
| 223598_at    | RAD23B          | 3,545499171  | 3,424287521  | 0,121211649 |  |



|              |              |              |              |             |  |
|--------------|--------------|--------------|--------------|-------------|--|
| 224582_s_at  | NUCKS1       | 3,348994562  | 3,227795991  | 0,121198572 |  |
| 226891_at    | XXYLT1       | 1,780386218  | 1,659204017  | 0,121182202 |  |
| 227133_at    | FAM199X      | 1,780386218  | 1,659204017  | 0,121182202 |  |
| 217902_s_at  | HERC2        | 3,121439986  | 3,000258961  | 0,121181026 |  |
| 209391_at    | DPM2         | 3,024094427  | 2,902971658  | 0,121122769 |  |
| 212688_at    | PIK3CB       | 5,004979787  | 4,883951109  | 0,121028678 |  |
| 209249_s_at  | GHITM        | 5,874316981  | 5,753290379  | 0,121026602 |  |
| 212880_at    | WDR7         | 2,26825514   | 2,147243253  | 0,121011888 |  |
| 213101_s_at  | ACTR3        | 6,832200789  | 6,711231616  | 0,120969173 |  |
| 1555467_a_at | CELF1        | 2,400710591  | 2,27978304   | 0,120927551 |  |
| 223551_at    | PKIB         | 2,303618506  | 2,182705233  | 0,120913273 |  |
| 233467_s_at  | TSPAN32      | 0,57782909   | 0,456918297  | 0,120910793 |  |
| 208709_s_at  | NRD1         | 4,455131038  | 4,334242016  | 0,120889022 |  |
| 225578_at    | MZT1         | 3,76038475   | 3,639498476  | 0,120886274 |  |
| 218222_x_at  | ARNT         | 0,20027154   | 0,079428135  | 0,120843404 |  |
| 219278_at    | MAP3K6       | 0,20027154   | 0,079428135  | 0,120843404 |  |
| 223515_s_at  | COQ3         | 3,620156261  | 3,499335901  | 0,12082036  |  |
| 222547_at    | MAP4K4       | 1,40228911   | 1,281471383  | 0,120817726 |  |
| 210132_at    | EFNA3        | 1,201332287  | 1,080561626  | 0,120770661 |  |
| 222147_s_at  | ACTR5        | 1,201332287  | 1,080561626  | 0,120770661 |  |
| 201707_at    | PEX19        | 2,127340679  | 2,006570641  | 0,120770038 |  |
| 209242_at    | PEG3         | 5,426400135  | 5,305636527  | 0,120763608 |  |
| 219556_at    | C16orf59     | 2,166283906  | 2,045615873  | 0,120668033 |  |
| 208078_s_at  | SIK1         | 2,688444421  | 2,567790814  | 0,120653607 |  |
| 1552312_a_at | MFAP3        | 1,274448124  | 1,153866761  | 0,120581363 |  |
| 202697_at    | NUDT21       | 4,474655091  | 4,354078399  | 0,120576691 |  |
| 226495_at    | MAVS         | 2,926807124  | 2,806245339  | 0,120561785 |  |
| 212030_at    | RBM25        | 4,490086298  | 4,369548294  | 0,120538004 |  |
| 201408_at    | PPP1CB       | 2,406821352  | 2,286318242  | 0,120503111 |  |
| 201567_s_at  | GOLGA4       | 3,556534813  | 3,436090594  | 0,120444218 |  |
| 202168_at    | TAF9         | 4,521870506  | 4,401504959  | 0,120365547 |  |
| 201894_s_at  | SSR1         | 4,673180244  | 4,552816898  | 0,120363346 |  |
| 205683_x_at  | TPSAB1       | 0,792179257  | 0,67181667   | 0,120362587 |  |
| 213785_at    | IPO9         | 0,792179257  | 0,67181667   | 0,120362587 |  |
| 203957_at    | E2F6         | 3,599852114  | 3,479511525  | 0,120340589 |  |
| 228857_at    | GNL1         | 1,69307511   | 1,572742379  | 0,120332731 |  |
| 1555783_x_at | PQLC2        | 1,530951994  | 1,410714371  | 0,120237622 |  |
| 219758_at    | TTC26        | 1,530951994  | 1,410714371  | 0,120237622 |  |
| 216954_x_at  | ATP5O        | 4,11599613   | 3,995764148  | 0,120231981 |  |
| 237441_at    | -            | 2,410880861  | 2,290658654  | 0,120222207 |  |
| 201063_at    | RCN1         | 3,757996542  | 3,637795954  | 0,120200589 |  |
| 204373_s_at  | CEP350       | 2,842156496  | 2,721978587  | 0,120177909 |  |
| 202963_at    | RFX5         | 2,503131904  | 2,382985886  | 0,120146018 |  |
| 1554397_s_at | UEVLD        | 0,888485433  | 0,768343791  | 0,120141643 |  |
| 211375_s_at  | ILF3         | 6,519719809  | 6,399582123  | 0,120137686 |  |
| 206468_s_at  | METTL13      | 2,771299138  | 2,651169275  | 0,120129863 |  |
| 1565558_at   | -            | 1,210676994  | 1,090553537  | 0,120123457 |  |
| 228729_at    | CCNB1        | 3,933331467  | 3,813221015  | 0,120110451 |  |
| 1555417_a_at | TAS1R1       | -1,543331864 | -1,663414495 | 0,12008263  |  |
| 1556398_a_at | -            | -1,543331864 | -1,663414495 | 0,12008263  |  |
| 1561979_at   | LOC100505635 | -1,543331864 | -1,663414495 | 0,12008263  |  |
| 217512_at    | KNG1         | -1,543331864 | -1,663414495 | 0,12008263  |  |
| 219516_at    | TRPV4        | -1,543331864 | -1,663414495 | 0,12008263  |  |
| 221231_s_at  | C14orf102    | -1,543331864 | -1,663414495 | 0,12008263  |  |
| 225151_at    | RTKN         | -1,543331864 | -1,663414495 | 0,12008263  |  |
| 231230_at    | KCNK10       | -1,543331864 | -1,663414495 | 0,12008263  |  |

|              |                  |              |              |             |  |
|--------------|------------------|--------------|--------------|-------------|--|
| 232694_at    | ZNF395           | -1,543331864 | -1,663414495 | 0,12008263  |  |
| 236397_at    | -                | -1,543331864 | -1,663414495 | 0,12008263  |  |
| 237025_at    | -                | -1,543331864 | -1,663414495 | 0,12008263  |  |
| 239450_at    | -                | -1,543331864 | -1,663414495 | 0,12008263  |  |
| 241515_at    | -                | -1,543331864 | -1,663414495 | 0,12008263  |  |
| 242287_at    | CLIP1            | -1,543331864 | -1,663414495 | 0,12008263  |  |
| 242799_at    | -                | -1,543331864 | -1,663414495 | 0,12008263  |  |
| 243722_at    | PYDC1            | -1,543331864 | -1,663414495 | 0,12008263  |  |
| 243831_at    | -                | -1,543331864 | -1,663414495 | 0,12008263  |  |
| 210338_s_at  | HSPA8 /// SNOR   | 7,720280366  | 7,600227024  | 0,120053342 |  |
| 226446_at    | HES6             | 2,618203384  | 2,498185745  | 0,120017639 |  |
| 200763_s_at  | RPLP1            | 7,998907246  | 7,878896491  | 0,120010755 |  |
| 235099_at    | CMTM8            | 1,414471577  | 1,294497133  | 0,119974445 |  |
| 228208_x_at  | ZNF354C          | 2,646022818  | 2,526063925  | 0,119958893 |  |
| 211956_s_at  | EIF1             | 7,257729446  | 7,137789285  | 0,119940161 |  |
| 1552837_at   | ICK              | -3,15396682  | -3,273861381 | 0,119894561 |  |
| 1552974_at   | -                | -3,15396682  | -3,273861381 | 0,119894561 |  |
| 1553474_at   | LOC100288966 /   | -3,15396682  | -3,273861381 | 0,119894561 |  |
| 1562364_at   | GVINP1           | -3,15396682  | -3,273861381 | 0,119894561 |  |
| 1569663_at   | -                | -3,15396682  | -3,273861381 | 0,119894561 |  |
| 209909_s_at  | TGFB2            | -3,15396682  | -3,273861381 | 0,119894561 |  |
| 210999_s_at  | GRB10            | 1,699726954  | 1,579853228  | 0,119873726 |  |
| 226979_at    | MAP3K2           | 3,102740237  | 2,982929462  | 0,119810775 |  |
| 218093_s_at  | ANKRD10          | 3,043834719  | 2,924079008  | 0,119755711 |  |
| 214816_x_at  | C19orf40         | 2,320980353  | 2,201267805  | 0,119712548 |  |
| 209089_at    | RAB5A            | 5,231023008  | 5,111373454  | 0,119649554 |  |
| 217737_x_at  | C20orf43         | 4,288076367  | 4,168435485  | 0,119640882 |  |
| 226662_at    | STX17            | 1,940595304  | 1,820984782  | 0,119610522 |  |
| 204883_s_at  | HUS1             | 2,450859799  | 2,331254065  | 0,119605734 |  |
| 223748_at    | SLC4A11          | 0,984222186  | 0,864649967  | 0,119572218 |  |
| 208460_at    | GJC1             | -0,299034815 | -0,41858459  | 0,119549775 |  |
| 213388_at    | LOC728802 /// PI | -0,299034815 | -0,41858459  | 0,119549775 |  |
| 214301_s_at  | DPYSL4           | -0,299034815 | -0,41858459  | 0,119549775 |  |
| 215661_at    | MAST2            | -0,299034815 | -0,41858459  | 0,119549775 |  |
| 215886_x_at  | USP12            | -0,299034815 | -0,41858459  | 0,119549775 |  |
| 216555_at    | PRR14L           | -0,299034815 | -0,41858459  | 0,119549775 |  |
| 218523_at    | LHPP             | -0,299034815 | -0,41858459  | 0,119549775 |  |
| 227664_at    | FLJ37453         | -0,299034815 | -0,41858459  | 0,119549775 |  |
| 232566_at    | NOL6             | -0,299034815 | -0,41858459  | 0,119549775 |  |
| 236143_at    | -                | -0,299034815 | -0,41858459  | 0,119549775 |  |
| 236392_at    | CUL9             | -0,299034815 | -0,41858459  | 0,119549775 |  |
| 237307_at    | -                | -0,299034815 | -0,41858459  | 0,119549775 |  |
| 213334_x_at  | HAUS7            | 2,254767157  | 2,135226207  | 0,11954095  |  |
| 228477_at    | ARGLU1           | 3,541801785  | 3,42231092   | 0,119490864 |  |
| 208549_x_at  | PTMA             | 5,843580761  | 5,724103011  | 0,11947775  |  |
| 1557984_s_at | RPAP3            | 2,027765132  | 1,908311039  | 0,119454093 |  |
| 218858_at    | DEPTOR           | 1,422536444  | 1,303116084  | 0,11942036  |  |
| 201518_at    | CBX1             | 4,275330031  | 4,155999779  | 0,119330252 |  |
| 204692_at    | LRCH4 /// SAP25  | 3,572931593  | 3,453616097  | 0,119315496 |  |
| 228597_at    | MIS18A           | 4,746086726  | 4,626777417  | 0,119309309 |  |
| 222119_s_at  | FBXO11           | 3,050355245  | 2,93104672   | 0,119308526 |  |
| 1555326_a_at | ADAM9            | 1,224581536  | 1,105412836  | 0,1191687   |  |
| 211100_x_at  | LILRA2           | 0,072842263  | -0,046302147 | 0,11914441  |  |
| 223948_s_at  | TMPRSS3          | 0,072842263  | -0,046302147 | 0,11914441  |  |
| 239203_at    | C7orf53          | 0,072842263  | -0,046302147 | 0,11914441  |  |
| 244356_at    | -                | 0,072842263  | -0,046302147 | 0,11914441  |  |

|              |                |              |              |             |  |
|--------------|----------------|--------------|--------------|-------------|--|
| 205497_at    | ZNF175         | 2,947914474  | 2,828804976  | 0,119109498 |  |
| 1552362_a_at | LEAP2          | 0,810733188  | 0,691645685  | 0,119087502 |  |
| 1558393_at   | KRT7           | 0,810733188  | 0,691645685  | 0,119087502 |  |
| 226114_at    | ZNF436         | 0,810733188  | 0,691645685  | 0,119087502 |  |
| 238581_at    | GBP5           | 0,810733188  | 0,691645685  | 0,119087502 |  |
| 209812_x_at  | CASP2          | 2,151803104  | 2,032717854  | 0,11908525  |  |
| 204018_x_at  | HBA1 /// HBA2  | 5,420120192  | 5,301072115  | 0,119048077 |  |
| 1554344_s_at | AQP12A /// AQP | 2,190100188  | 2,071071048  | 0,11902914  |  |
| 202033_s_at  | RB1CC1         | 4,253455927  | 4,13442882   | 0,119027107 |  |
| 224782_at    | ZMAT2          | 4,279776324  | 4,160749839  | 0,119026485 |  |
| 212600_s_at  | UQCRC2         | 5,402771752  | 5,28375775   | 0,119014002 |  |
| 227935_s_at  | PCGF5          | 1,549482847  | 1,43051703   | 0,118965817 |  |
| 1558174_at   | FAM43A         | 0,228146222  | 0,109221392  | 0,118924829 |  |
| 1565852_at   | -              | 0,228146222  | 0,109221392  | 0,118924829 |  |
| 229789_at    | TIGD3          | 0,228146222  | 0,109221392  | 0,118924829 |  |
| 232299_at    | C2orf82        | 0,228146222  | 0,109221392  | 0,118924829 |  |
| 234841_x_at  | OBP2A          | 0,228146222  | 0,109221392  | 0,118924829 |  |
| 200764_s_at  | CTNNA1         | 2,035673598  | 1,916759838  | 0,118913761 |  |
| 228127_at    | KCNK3          | 0,995078803  | 0,876248481  | 0,118830322 |  |
| 77508_r_at   | RABEP2         | 0,995078803  | 0,876248481  | 0,118830322 |  |
| 1552296_at   | BEST4          | -2,384869671 | -2,503677622 | 0,118807951 |  |
| 1553894_at   | CCDC122        | -2,384869671 | -2,503677622 | 0,118807951 |  |
| 1561139_at   | -              | -2,384869671 | -2,503677622 | 0,118807951 |  |
| 1563643_at   | -              | -2,384869671 | -2,503677622 | 0,118807951 |  |
| 204726_at    | CDH13          | -2,384869671 | -2,503677622 | 0,118807951 |  |
| 207329_at    | MMP8           | -2,384869671 | -2,503677622 | 0,118807951 |  |
| 217578_at    | -              | -2,384869671 | -2,503677622 | 0,118807951 |  |
| 221092_at    | IKZF3          | -2,384869671 | -2,503677622 | 0,118807951 |  |
| 221149_at    | GPR77          | -2,384869671 | -2,503677622 | 0,118807951 |  |
| 224146_s_at  | ABCC11         | -2,384869671 | -2,503677622 | 0,118807951 |  |
| 229471_s_at  | SRSF8          | -2,384869671 | -2,503677622 | 0,118807951 |  |
| 230244_at    | C2orf82        | -2,384869671 | -2,503677622 | 0,118807951 |  |
| 232303_at    | ZNF608         | -2,384869671 | -2,503677622 | 0,118807951 |  |
| 237139_at    | PDE9A          | -2,384869671 | -2,503677622 | 0,118807951 |  |
| 239693_at    | SNX24          | -2,384869671 | -2,503677622 | 0,118807951 |  |
| 241864_x_at  | -              | -2,384869671 | -2,503677622 | 0,118807951 |  |
| 243386_at    | CASZ1          | -2,384869671 | -2,503677622 | 0,118807951 |  |
| 244573_at    | -              | -2,384869671 | -2,503677622 | 0,118807951 |  |
| 244634_at    | -              | -2,384869671 | -2,503677622 | 0,118807951 |  |
| 1553545_at   | ILDR1          | -0,83191556  | -0,950686014 | 0,118770455 |  |
| 1557688_at   | -              | -0,83191556  | -0,950686014 | 0,118770455 |  |
| 1566102_at   | TTLL5          | -0,83191556  | -0,950686014 | 0,118770455 |  |
| 1569368_at   | LOC283693      | -0,83191556  | -0,950686014 | 0,118770455 |  |
| 1569383_s_at | ZFYVE28        | -0,83191556  | -0,950686014 | 0,118770455 |  |
| 1570038_at   | ZNF595         | -0,83191556  | -0,950686014 | 0,118770455 |  |
| 205388_at    | TNNC2          | -0,83191556  | -0,950686014 | 0,118770455 |  |
| 207687_at    | INHBC          | -0,83191556  | -0,950686014 | 0,118770455 |  |
| 207732_s_at  | DLG3           | -0,83191556  | -0,950686014 | 0,118770455 |  |
| 210219_at    | SP100          | -0,83191556  | -0,950686014 | 0,118770455 |  |
| 213914_s_at  | SPTBN1         | -0,83191556  | -0,950686014 | 0,118770455 |  |
| 228506_at    | NSMCE4A        | -0,83191556  | -0,950686014 | 0,118770455 |  |
| 234721_s_at  | CYP26B1        | -0,83191556  | -0,950686014 | 0,118770455 |  |
| 240187_at    | PPP1R3C        | -0,83191556  | -0,950686014 | 0,118770455 |  |
| 244859_at    | -              | -0,83191556  | -0,950686014 | 0,118770455 |  |
| 214293_at    | 40787          | 1,716223609  | 1,59747851   | 0,118745099 |  |
| 1557226_a_at | ASPG           | 1,079110292  | 0,960386719  | 0,118723573 |  |

|              |                  |              |              |             |  |
|--------------|------------------|--------------|--------------|-------------|--|
| 1557689_at   | -                | 1,079110292  | 0,960386719  | 0,118723573 |  |
| 218928_s_at  | SLC37A1          | 1,079110292  | 0,960386719  | 0,118723573 |  |
| 217749_at    | COPG1            | 3,231115193  | 3,112391743  | 0,11872345  |  |
| 241373_at    | -                | 1,119359127  | 1,000684521  | 0,118674606 |  |
| 1555968_a_at | -                | 0,496120222  | 0,377530647  | 0,118589575 |  |
| 236301_at    | IKZF3            | 0,496120222  | 0,377530647  | 0,118589575 |  |
| 223047_at    | CMTM6            | 4,111014386  | 3,992437318  | 0,118577068 |  |
| 223044_at    | SLC40A1          | 6,807778103  | 6,68920807   | 0,118570033 |  |
| 1561525_at   | -                | -3,192553003 | -3,311072652 | 0,118519649 |  |
| 1566865_at   | FAM200A          | -3,192553003 | -3,311072652 | 0,118519649 |  |
| 220656_at    | -                | -3,192553003 | -3,311072652 | 0,118519649 |  |
| 203237_s_at  | NOTCH3           | 0,613492853  | 0,495031851  | 0,118461002 |  |
| 203626_s_at  | SKP2             | 0,613492853  | 0,495031851  | 0,118461002 |  |
| 223048_at    | SDHAF2           | 3,199783157  | 3,081412119  | 0,118371038 |  |
| 233124_s_at  | ECHDC1           | 4,218563327  | 4,100219485  | 0,118343842 |  |
| 214246_x_at  | MINK1            | 3,002736078  | 2,884425449  | 0,11831063  |  |
| 228728_at    | CPED1            | 2,438982012  | 2,320681318  | 0,118300694 |  |
| 211325_x_at  | DSTNP2           | 1,960118853  | 1,841838775  | 0,118280079 |  |
| 200010_at    | RPL11            | 7,523253047  | 7,404986363  | 0,118266684 |  |
| 242583_at    | STON2            | 0,822971223  | 0,704715219  | 0,118256004 |  |
| 211340_s_at  | MCAM             | 4,88279496   | 4,764601839  | 0,118193121 |  |
| 218439_s_at  | COMMD10          | 3,046446467  | 2,928263672  | 0,118182795 |  |
| 203175_at    | RHOG             | 3,674351634  | 3,556324192  | 0,118027442 |  |
| 232909_s_at  | BPTF /// LOC146  | 2,277177578  | 2,159161028  | 0,118016551 |  |
| 212265_at    | QKI              | 5,563544186  | 5,445531846  | 0,11801234  |  |
| 225674_at    | BCAP29           | 2,089851283  | 1,971855016  | 0,117996267 |  |
| 227110_at    | HNRNPC /// LOC   | 4,007586951  | 3,889604025  | 0,117982926 |  |
| 225834_at    | FAM72A /// FAM7  | 5,360237789  | 5,242343956  | 0,117893833 |  |
| 1552338_at   | GSC              | -1,424023738 | -1,541908042 | 0,117884304 |  |
| 1555203_s_at | SLC44A4          | -1,424023738 | -1,541908042 | 0,117884304 |  |
| 1561221_x_at | LOC728099        | -1,424023738 | -1,541908042 | 0,117884304 |  |
| 202796_at    | SYNPO            | -1,424023738 | -1,541908042 | 0,117884304 |  |
| 204007_at    | FCGR3B           | -1,424023738 | -1,541908042 | 0,117884304 |  |
| 205143_at    | NCAN             | -1,424023738 | -1,541908042 | 0,117884304 |  |
| 205376_at    | INPP4B           | -1,424023738 | -1,541908042 | 0,117884304 |  |
| 210731_s_at  | LGALS8           | -1,424023738 | -1,541908042 | 0,117884304 |  |
| 210876_at    | ANXA2P1          | -1,424023738 | -1,541908042 | 0,117884304 |  |
| 211347_at    | CDC14B           | -1,424023738 | -1,541908042 | 0,117884304 |  |
| 212831_at    | MEGF9            | -1,424023738 | -1,541908042 | 0,117884304 |  |
| 233735_at    | -                | -1,424023738 | -1,541908042 | 0,117884304 |  |
| 236405_at    | FBXO41           | -1,424023738 | -1,541908042 | 0,117884304 |  |
| 237612_at    | -                | -1,424023738 | -1,541908042 | 0,117884304 |  |
| 237940_s_at  | -                | -1,424023738 | -1,541908042 | 0,117884304 |  |
| 238292_at    | -                | -1,424023738 | -1,541908042 | 0,117884304 |  |
| 239387_at    | -                | -1,424023738 | -1,541908042 | 0,117884304 |  |
| 239719_at    | CD109            | -1,424023738 | -1,541908042 | 0,117884304 |  |
| 241085_at    | -                | -1,424023738 | -1,541908042 | 0,117884304 |  |
| 242963_at    | SGMS2            | -1,424023738 | -1,541908042 | 0,117884304 |  |
| 202130_at    | RIOK3            | 4,288076367  | 4,170203296  | 0,117873071 |  |
| 207507_s_at  | ATP5G3           | 6,592619964  | 6,474761006  | 0,117858958 |  |
| 1565604_at   | PWP2             | -0,078265071 | -0,19610998  | 0,117844909 |  |
| 214797_s_at  | CDK18            | -0,078265071 | -0,19610998  | 0,117844909 |  |
| 229243_at    | -                | -0,078265071 | -0,19610998  | 0,117844909 |  |
| 234960_at    | HIST1H4A /// HIS | -0,078265071 | -0,19610998  | 0,117844909 |  |
| 243531_at    | ORAOV1           | -0,078265071 | -0,19610998  | 0,117844909 |  |
| 237561_x_at  | -                | 1,011212064  | 0,893473268  | 0,117738796 |  |

|              |                  |              |              |             |  |
|--------------|------------------|--------------|--------------|-------------|--|
| 223886_s_at  | RNF146           | 3,58196103   | 3,464222256  | 0,117738774 |  |
| 201828_x_at  | FAM127A          | 3,22766727   | 3,109937707  | 0,117729563 |  |
| 235394_at    | PLAA             | 1,567778694  | 1,450051551  | 0,117727143 |  |
| 231947_at    | MYCT1            | 3,818840142  | 3,701119714  | 0,117720427 |  |
| 219644_at    | CCDC41           | 1,62481334   | 1,507116528  | 0,117696812 |  |
| 222689_at    | ACER3            | 1,094335495  | 0,976641161  | 0,117694334 |  |
| 1552375_at   | ZNF333           | 0,246434561  | 0,128747141  | 0,11768742  |  |
| 204002_s_at  | ICA1             | 0,246434561  | 0,128747141  | 0,11768742  |  |
| 222317_at    | PDE3B            | 0,246434561  | 0,128747141  | 0,11768742  |  |
| 224574_at    | C17orf49 /// RNA | 3,568395593  | 3,450709925  | 0,117685669 |  |
| 232524_x_at  | ANAPC4           | 3,50998543   | 3,392332256  | 0,117653175 |  |
| 218633_x_at  | ABHD10           | 3,525045272  | 3,407399455  | 0,117645818 |  |
| 1559490_at   | LRCH3            | 0,384950573  | 0,26733076   | 0,117619814 |  |
| 232392_at    | SRSF3            | 0,384950573  | 0,26733076   | 0,117619814 |  |
| 219401_at    | XYLT2            | 1,318332599  | 1,200746069  | 0,11758653  |  |
| 213184_at    | SENP5            | 2,734521183  | 2,617011906  | 0,117509277 |  |
| 200079_s_at  | KARS             | 5,388046388  | 5,270634231  | 0,117412157 |  |
| 218206_x_at  | SCAND1           | 4,268634793  | 4,151234028  | 0,117400765 |  |
| 208707_at    | EIF5             | 1,835789711  | 1,718396606  | 0,117393105 |  |
| 214739_at    | LRCH3            | 1,835789711  | 1,718396606  | 0,117393105 |  |
| 1558814_s_at | TMED5            | -0,496991414 | -0,614371577 | 0,117380163 |  |
| 1563048_at   | -                | -0,496991414 | -0,614371577 | 0,117380163 |  |
| 202440_s_at  | ST5              | -0,496991414 | -0,614371577 | 0,117380163 |  |
| 204960_at    | PTPRCAP          | -0,496991414 | -0,614371577 | 0,117380163 |  |
| 206828_at    | TXK              | -0,496991414 | -0,614371577 | 0,117380163 |  |
| 209948_at    | KCNMB1           | -0,496991414 | -0,614371577 | 0,117380163 |  |
| 220763_at    | HSPA12A          | -0,496991414 | -0,614371577 | 0,117380163 |  |
| 236770_at    | TPTE2P5          | -0,496991414 | -0,614371577 | 0,117380163 |  |
| 238499_at    | SLC45A3          | -0,496991414 | -0,614371577 | 0,117380163 |  |
| 239189_at    | CASKIN1          | -0,496991414 | -0,614371577 | 0,117380163 |  |
| 241696_at    | CNTLN            | -0,496991414 | -0,614371577 | 0,117380163 |  |
| 227294_at    | ZNF689           | 2,420979937  | 2,303602088  | 0,117377849 |  |
| 229119_s_at  | ZSWIM7           | 2,763383302  | 2,646096941  | 0,117286361 |  |
| 200614_at    | CLTC             | 6,832957376  | 6,715676968  | 0,117280407 |  |
| 235334_at    | ST6GALNAC3       | 1,454352496  | 1,337086025  | 0,117266472 |  |
| 242110_at    | -                | 1,454352496  | 1,337086025  | 0,117266472 |  |
| 215722_s_at  | SNRPA1           | 3,121439986  | 3,004228687  | 0,1172113   |  |
| 121_at       | PAX8             | 1,862713491  | 1,745526308  | 0,117187183 |  |
| 223113_at    | TMEM138          | 3,659926886  | 3,542741726  | 0,11718516  |  |
| 223647_x_at  | HSCB             | 2,392522438  | 2,275409734  | 0,117112703 |  |
| 218671_s_at  | ATPIF1           | 3,988699475  | 3,871608557  | 0,117090918 |  |
| 203747_at    | AQP3             | 2,605861638  | 2,488772006  | 0,117089632 |  |
| 201239_s_at  | LOC653566 /// SI | 5,119171181  | 5,002138926  | 0,117032255 |  |
| 1554014_at   | CHD2             | 1,021868205  | 0,904843258  | 0,117024947 |  |
| 223442_at    | NICN1            | 1,578645857  | 1,461646549  | 0,116999307 |  |
| 218034_at    | FIS1             | 3,729838025  | 3,6128809    | 0,116957126 |  |
| 1558081_at   | SNORA65          | -0,79540287  | -0,912331589 | 0,116928719 |  |
| 1561400_at   | -                | -0,79540287  | -0,912331589 | 0,116928719 |  |
| 206801_at    | NPPB             | -0,79540287  | -0,912331589 | 0,116928719 |  |
| 208443_x_at  | SHOX2            | -0,79540287  | -0,912331589 | 0,116928719 |  |
| 213868_s_at  | DHRS7            | -0,79540287  | -0,912331589 | 0,116928719 |  |
| 215291_at    | MKL1             | -0,79540287  | -0,912331589 | 0,116928719 |  |
| 223904_at    | PRKAG3           | -0,79540287  | -0,912331589 | 0,116928719 |  |
| 226646_at    | KLF2             | -0,79540287  | -0,912331589 | 0,116928719 |  |
| 228227_at    | ITGB1BP1         | -0,79540287  | -0,912331589 | 0,116928719 |  |
| 229142_s_at  | BBS1             | -0,79540287  | -0,912331589 | 0,116928719 |  |

|             |           |              |              |             |  |
|-------------|-----------|--------------|--------------|-------------|--|
| 233597_at   | PNPLA5    | -0,79540287  | -0,912331589 | 0,116928719 |  |
| 238931_at   | METTL16   | -0,79540287  | -0,912331589 | 0,116928719 |  |
| 242946_at   | CD53      | -0,79540287  | -0,912331589 | 0,116928719 |  |
| 228135_at   | C1orf52   | 4,13575284   | 4,018839599  | 0,116913241 |  |
| 222601_at   | UBA6      | 3,506195778  | 3,38929984   | 0,116895937 |  |
| 202862_at   | FAH       | 2,819431021  | 2,702564916  | 0,116866105 |  |
| 219055_at   | SRBD1     | 2,609398637  | 2,492544876  | 0,116853762 |  |
| 201041_s_at | DUSP1     | 2,259277178  | 2,14244844   | 0,116828738 |  |
| 227731_at   | CNBP      | 1,937784532  | 1,820984782  | 0,11679975  |  |
| 202599_s_at | NRIP1     | 3,492853048  | 3,376085218  | 0,11676783  |  |
| 62987_r_at  | CACNG4    | 3,904109866  | 3,787346121  | 0,116763745 |  |
| 1555192_at  | ZNF277    | -2,504600601 | -2,621331989 | 0,116731388 |  |
| 1560864_at  | -         | -2,504600601 | -2,621331989 | 0,116731388 |  |
| 1561274_at  | -         | -2,504600601 | -2,621331989 | 0,116731388 |  |
| 1562803_at  | LRRC37A5P | -2,504600601 | -2,621331989 | 0,116731388 |  |
| 1562873_at  | PWRN1     | -2,504600601 | -2,621331989 | 0,116731388 |  |
| 1564241_at  | ATP1A4    | -2,504600601 | -2,621331989 | 0,116731388 |  |
| 1566666_at  | -         | -2,504600601 | -2,621331989 | 0,116731388 |  |
| 1568897_at  | -         | -2,504600601 | -2,621331989 | 0,116731388 |  |
| 207161_at   | KIAA0087  | -2,504600601 | -2,621331989 | 0,116731388 |  |
| 207550_at   | MPL       | -2,504600601 | -2,621331989 | 0,116731388 |  |
| 208147_s_at | CYP2C8    | -2,504600601 | -2,621331989 | 0,116731388 |  |
| 209493_at   | PDZD2     | -2,504600601 | -2,621331989 | 0,116731388 |  |
| 221040_at   | CAPN10    | -2,504600601 | -2,621331989 | 0,116731388 |  |
| 222455_s_at | PARVA     | -2,504600601 | -2,621331989 | 0,116731388 |  |
| 229045_at   | SNX20     | -2,504600601 | -2,621331989 | 0,116731388 |  |
| 231544_s_at | POLR3G    | -2,504600601 | -2,621331989 | 0,116731388 |  |
| 232741_at   | -         | -2,504600601 | -2,621331989 | 0,116731388 |  |
| 234504_at   | SUN5      | -2,504600601 | -2,621331989 | 0,116731388 |  |
| 235957_at   | GRIP1     | -2,504600601 | -2,621331989 | 0,116731388 |  |
| 236010_at   | -         | -2,504600601 | -2,621331989 | 0,116731388 |  |
| 236712_at   | -         | -2,504600601 | -2,621331989 | 0,116731388 |  |
| 236740_at   | -         | -2,504600601 | -2,621331989 | 0,116731388 |  |
| 238162_at   | -         | -2,504600601 | -2,621331989 | 0,116731388 |  |
| 238748_at   | RAD18     | -2,504600601 | -2,621331989 | 0,116731388 |  |
| 240645_at   | -         | -2,504600601 | -2,621331989 | 0,116731388 |  |
| 243236_at   | -         | -2,504600601 | -2,621331989 | 0,116731388 |  |
| 244739_at   | RDX       | -2,504600601 | -2,621331989 | 0,116731388 |  |
| 244854_at   | -         | -2,504600601 | -2,621331989 | 0,116731388 |  |
| 242557_at   | ZNRD1-AS1 | 1,331241794  | 1,214517879  | 0,116723915 |  |
| 204336_s_at | RGS19     | 3,69530589   | 3,578681277  | 0,116624613 |  |
| 222104_x_at | GTF2H3    | 3,668429488  | 3,551810897  | 0,116618591 |  |
| 201969_at   | NASP      | 2,87191078   | 2,755336312  | 0,116574469 |  |
| 210008_s_at | MRPS12    | 3,997499421  | 3,880994209  | 0,116505212 |  |
| 218740_s_at | CDK5RAP3  | 3,171349466  | 3,05486507   | 0,116484397 |  |
| 226631_at   | METTL10   | 2,369762403  | 2,253342112  | 0,116420291 |  |
| 206632_s_at | APOBEC3B  | 4,506303097  | 4,389920115  | 0,116382982 |  |
| 218839_at   | HEY1      | 6,765999734  | 6,649627688  | 0,116372046 |  |
| 221504_s_at | ATP6V1H   | 3,815781597  | 3,69948842   | 0,116293176 |  |
| 37860_at    | ZNF337    | 1,560488174  | 1,444218917  | 0,116269257 |  |
| 210235_s_at | PPFIA1    | 1,339784194  | 1,223626587  | 0,116157607 |  |
| 223444_at   | SENPF     | 1,339784194  | 1,223626587  | 0,116157607 |  |
| 210886_x_at | TP53TG1   | 0,648296226  | 0,532164371  | 0,116131855 |  |
| 237110_at   | -         | 0,648296226  | 0,532164371  | 0,116131855 |  |
| 241731_x_at | ZNF440    | 3,340506684  | 3,22439681   | 0,116109874 |  |
| 216320_x_at | MST1      | 0,533835206  | 0,417770464  | 0,116064743 |  |

|              |                 |              |              |             |  |
|--------------|-----------------|--------------|--------------|-------------|--|
| 203214_x_at  | CDK1            | 3,472604685  | 3,356551164  | 0,116053521 |  |
| 202375_at    | SEC24D          | 2,342392905  | 2,226407528  | 0,115985377 |  |
| 209093_s_at  | GBA /// GBAP1   | 1,037706275  | 0,921731975  | 0,1159743   |  |
| 55616_at     | PGAP3           | 0,995078803  | 0,879133598  | 0,115945205 |  |
| 212302_at    | RTF1            | 2,59519831   | 2,479296438  | 0,115901872 |  |
| 230282_at    | TSPAN3          | 0,273439642  | 0,157549243  | 0,115890399 |  |
| 230676_s_at  | TMEM19          | 0,273439642  | 0,157549243  | 0,115890399 |  |
| 235645_at    | ESCO1           | 0,273439642  | 0,157549243  | 0,115890399 |  |
| 217317_s_at  | HERC2P2 /// HEF | 4,070528765  | 3,954643074  | 0,115885691 |  |
| 214328_s_at  | HSP90AA1        | 7,834857791  | 7,719013403  | 0,115844388 |  |
| 222533_at    | CRBN            | 3,237986416  | 3,122166354  | 0,115820062 |  |
| 235056_at    | ETV6            | 1,859746653  | 1,743944487  | 0,115802165 |  |
| 201521_s_at  | NCBP2           | 3,102740237  | 2,986947093  | 0,115793144 |  |
| 215440_s_at  | BEX4            | 4,632475172  | 4,516682156  | 0,115793016 |  |
| 224919_at    | MRPS6           | 4,293033569  | 4,177252958  | 0,115780611 |  |
| 201322_at    | ATP5B           | 6,43305539   | 6,317280805  | 0,115774586 |  |
| 1564413_at   | FLJ36116        | 0,123193849  | 0,007421914  | 0,115771936 |  |
| 215683_at    | LOC100506070    | 0,123193849  | 0,007421914  | 0,115771936 |  |
| 227360_at    | RDH13           | 0,123193849  | 0,007421914  | 0,115771936 |  |
| 226128_at    | BROX            | 3,523171367  | 3,407399455  | 0,115771912 |  |
| 212168_at    | RBM12           | 4,618940011  | 4,50318707   | 0,115752942 |  |
| 210371_s_at  | RBBP4           | 5,481963596  | 5,366268691  | 0,115694905 |  |
| 201022_s_at  | DSTN            | 6,091495221  | 5,975801468  | 0,115693753 |  |
| 212711_at    | CAMSAP1         | 2,446911392  | 2,331254065  | 0,115657327 |  |
| 203396_at    | PSMA4           | 6,005521189  | 5,889993621  | 0,115527568 |  |
| 202233_s_at  | UQCRH /// UQCR  | 6,983562613  | 6,868035364  | 0,115527249 |  |
| 202659_at    | PSMB10          | 1,912238072  | 1,796776588  | 0,115461484 |  |
| 202798_at    | SEC24B          | 4,261908338  | 4,146452482  | 0,115455857 |  |
| 222728_s_at  | MIR1304 /// SNO | 3,828735867  | 3,713295978  | 0,115439889 |  |
| 204576_s_at  | CLUAP1          | 2,281618189  | 2,166264721  | 0,115353468 |  |
| 1568639_a_at | LOC100506995    | -0,234278768 | -0,34958478  | 0,115306013 |  |
| 204595_s_at  | STC1            | -0,234278768 | -0,34958478  | 0,115306013 |  |
| 206241_at    | KPNA5           | -0,234278768 | -0,34958478  | 0,115306013 |  |
| 211082_x_at  | MARK2           | -0,234278768 | -0,34958478  | 0,115306013 |  |
| 211631_x_at  | B4GALT1         | -0,234278768 | -0,34958478  | 0,115306013 |  |
| 214671_s_at  | ABR             | -0,234278768 | -0,34958478  | 0,115306013 |  |
| 224198_at    | CELA1           | -0,234278768 | -0,34958478  | 0,115306013 |  |
| 229237_s_at  | -               | -0,234278768 | -0,34958478  | 0,115306013 |  |
| 229930_at    | LOC100134361    | -0,234278768 | -0,34958478  | 0,115306013 |  |
| 230428_at    | -               | -0,234278768 | -0,34958478  | 0,115306013 |  |
| 244625_at    | -               | -0,234278768 | -0,34958478  | 0,115306013 |  |
| 1554128_at   | ADIG            | 1,04816921   | 0,932882274  | 0,115286936 |  |
| 232780_s_at  | ZNF691          | 1,04816921   | 0,932882274  | 0,115286936 |  |
| 226626_at    | THOC2           | 3,561108198  | 3,445853256  | 0,115254942 |  |
| 223013_at    | TBL1XR1         | 5,288138786  | 5,172917458  | 0,115221327 |  |
| 1556062_at   | RPP30           | -1,308181863 | -1,423348341 | 0,115166478 |  |
| 1561042_at   | LOC286109       | -1,308181863 | -1,423348341 | 0,115166478 |  |
| 201510_at    | ELF3            | -1,308181863 | -1,423348341 | 0,115166478 |  |
| 202994_s_at  | FBLN1           | -1,308181863 | -1,423348341 | 0,115166478 |  |
| 210518_at    | CDH8            | -1,308181863 | -1,423348341 | 0,115166478 |  |
| 221403_s_at  | INSL6           | -1,308181863 | -1,423348341 | 0,115166478 |  |
| 224551_s_at  | SPTBN4          | -1,308181863 | -1,423348341 | 0,115166478 |  |
| 234670_at    | -               | -1,308181863 | -1,423348341 | 0,115166478 |  |
| 235975_at    | MTO1            | -1,308181863 | -1,423348341 | 0,115166478 |  |
| 241768_at    | -               | -1,308181863 | -1,423348341 | 0,115166478 |  |
| 224844_at    | SLAIN2          | 2,796341835  | 2,681234383  | 0,115107452 |  |

|              |                 |              |              |             |  |
|--------------|-----------------|--------------|--------------|-------------|--|
| 225264_at    | RARS2           | 4,585658616  | 4,470561285  | 0,115097331 |  |
| 229790_at    | TERF2           | 2,051361651  | 1,936283387  | 0,115078264 |  |
| 214045_at    | LIAS            | 2,846658948  | 2,731588328  | 0,11507062  |  |
| 1552411_at   | DEFB106A /// DE | 0,87091093   | 0,755840599  | 0,115070331 |  |
| 225193_at    | KIAA1967        | 0,87091093   | 0,755840599  | 0,115070331 |  |
| 200677_at    | PTTG1IP         | 6,553277031  | 6,43824208   | 0,115034951 |  |
| 219691_at    | SAMD9           | 2,009141686  | 1,894118818  | 0,115022868 |  |
| 202818_s_at  | TCEB3           | 2,134723057  | 2,019703483  | 0,115019574 |  |
| 218909_at    | RPS6KC1         | 2,134723057  | 2,019703483  | 0,115019574 |  |
| 201263_at    | TARS            | 5,282610972  | 5,167617512  | 0,114993461 |  |
| 243436_at    | -               | -3,287237186 | -3,402185466 | 0,11494828  |  |
| 1553304_at   | LSM14B          | 0,425644434  | 0,310717132  | 0,114927302 |  |
| 1562081_a_at | LINC00424       | 0,425644434  | 0,310717132  | 0,114927302 |  |
| 204657_s_at  | SHB             | 0,425644434  | 0,310717132  | 0,114927302 |  |
| 211231_x_at  | CYP4A11         | 0,425644434  | 0,310717132  | 0,114927302 |  |
| 222463_s_at  | BACE1           | 0,425644434  | 0,310717132  | 0,114927302 |  |
| 201857_at    | ZFR             | 5,513217422  | 5,398297283  | 0,114920139 |  |
| 219753_at    | STAG3           | 1,774096855  | 1,659204017  | 0,114892839 |  |
| 201657_at    | ARL1            | 2,898174856  | 2,783327323  | 0,114847532 |  |
| 221219_s_at  | KLHDC4 /// LOC  | 3,097712429  | 2,982929462  | 0,114782967 |  |
| 203497_at    | MED1            | 3,899783451  | 3,785040604  | 0,114742848 |  |
| 213171_s_at  | MMP24           | 0,291166226  | 0,176436073  | 0,114730152 |  |
| 220195_at    | MBD5            | 0,291166226  | 0,176436073  | 0,114730152 |  |
| 220370_s_at  | USP36           | 0,291166226  | 0,176436073  | 0,114730152 |  |
| 236692_at    | -               | 0,291166226  | 0,176436073  | 0,114730152 |  |
| 226628_at    | THOC2           | 2,429008604  | 2,314300277  | 0,114708327 |  |
| 218363_at    | EXD2            | 1,493160564  | 1,378453643  | 0,114706921 |  |
| 207181_s_at  | CASP7           | 2,139623739  | 2,024923328  | 0,114700411 |  |
| 227793_at    | MIRLET7D        | 1,292162421  | 1,177496821  | 0,1146656   |  |
| 218956_s_at  | ATP5J2-PTCD1 /  | 2,292660284  | 2,17802703   | 0,114633254 |  |
| 202497_x_at  | SLC2A3          | 5,560121297  | 5,445531846  | 0,114589452 |  |
| 222608_s_at  | ANLN            | 4,209852334  | 4,09526554   | 0,114586794 |  |
| 241484_x_at  | -               | 1,556829052  | 1,442269454  | 0,114559598 |  |
| 229563_s_at  | RPL10A          | 7,938674672  | 7,824134717  | 0,114539955 |  |
| 238156_at    | -               | 3,182077878  | 3,067567462  | 0,114510416 |  |
| 219363_s_at  | MTERFD1         | 4,611022217  | 4,496626742  | 0,114395475 |  |
| 635_s_at     | PPP2R5B         | 0,55966116   | 0,445285082  | 0,114376078 |  |
| 201483_s_at  | SUPT4H1         | 4,279221286  | 4,164893351  | 0,114327935 |  |
| 228114_x_at  | C16orf13        | 1,67631007   | 1,562009954  | 0,114300116 |  |
| 1561937_x_at | -               | 1,063722698  | 0,949447784  | 0,114274914 |  |
| 227531_at    | CLOCK           | 1,063722698  | 0,949447784  | 0,114274914 |  |
| 200685_at    | SRSF11          | 2,333865983  | 2,21959457   | 0,114271413 |  |
| 226825_s_at  | TMEM165         | 4,205184875  | 4,090916839  | 0,114268035 |  |
| 225320_at    | MCU             | 2,705069849  | 2,590852465  | 0,114217385 |  |
| 224523_s_at  | C3orf26         | 4,718920906  | 4,604723207  | 0,114197699 |  |
| 1558140_at   | PLXNA1          | -0,022466681 | -0,136643983 | 0,114177302 |  |
| 206513_at    | AIM2            | -0,022466681 | -0,136643983 | 0,114177302 |  |
| 208044_s_at  | PPARD           | -0,022466681 | -0,136643983 | 0,114177302 |  |
| 240826_at    | -               | -0,022466681 | -0,136643983 | 0,114177302 |  |
| 242788_at    | KDM4D           | -0,022466681 | -0,136643983 | 0,114177302 |  |
| 1555257_a_at | MYO3B           | -0,741668563 | -0,855751026 | 0,114082463 |  |
| 215961_at    | F12             | -0,741668563 | -0,855751026 | 0,114082463 |  |
| 217004_s_at  | MCF2            | -0,741668563 | -0,855751026 | 0,114082463 |  |
| 224483_s_at  | MFSD9           | -0,741668563 | -0,855751026 | 0,114082463 |  |
| 232672_x_at  | SLC24A5         | -0,741668563 | -0,855751026 | 0,114082463 |  |
| 237558_at    | -               | -0,741668563 | -0,855751026 | 0,114082463 |  |



|              |                |              |              |             |  |
|--------------|----------------|--------------|--------------|-------------|--|
| 236978_at    | -              | 1,504602299  | 1,390636111  | 0,113966188 |  |
| 238477_at    | KIF1C          | 2,303618506  | 2,189694216  | 0,11392429  |  |
| 207455_at    | P2RY1          | 0,682279745  | 0,568365095  | 0,11391465  |  |
| 202983_at    | HLTF           | 5,074765177  | 4,960861351  | 0,113903826 |  |
| 224830_at    | NUDT21         | 5,434648023  | 5,320836197  | 0,113811826 |  |
| 225710_at    | GNB4           | 5,107650169  | 4,99384426   | 0,113805909 |  |
| 221934_s_at  | DALRD3         | 1,153678675  | 1,039887232  | 0,113791444 |  |
| 227910_at    | XPNPEP3        | 1,153678675  | 1,039887232  | 0,113791444 |  |
| 218329_at    | PRDM4          | 2,739371812  | 2,625627364  | 0,113744449 |  |
| 224838_at    | FOXP1          | 2,739371812  | 2,625627364  | 0,113744449 |  |
| 225446_at    | BRWD1          | 3,394805732  | 3,281121096  | 0,113684636 |  |
| 221636_s_at  | MARC2          | 0,57058931   | 0,456918297  | 0,113671013 |  |
| 225536_at    | TMEM54         | 0,57058931   | 0,456918297  | 0,113671013 |  |
| 231828_at    | LOC253039      | 2,030406107  | 1,916759838  | 0,11364627  |  |
| 224581_s_at  | NUCKS1         | 4,931823006  | 4,818200317  | 0,113622689 |  |
| 230329_s_at  | NUDT6          | 1,940595304  | 1,826973888  | 0,113621416 |  |
| 1563040_s_at | LOC100506195   | -3,32387526  | -3,437493426 | 0,113618166 |  |
| 226372_at    | CHST11         | 2,986507217  | 2,87289275   | 0,113614467 |  |
| 206147_x_at  | SCML2          | 3,659073863  | 3,545468469  | 0,113605394 |  |
| 226255_at    | ZBTB33         | 3,715139632  | 3,601570866  | 0,113568766 |  |
| 222825_at    | OTUD6B         | 4,042675065  | 3,92911743   | 0,113557635 |  |
| 209647_s_at  | SOCS5          | 2,197169074  | 2,083632167  | 0,113536907 |  |
| 228564_at    | LOC375295      | 1,631786706  | 1,518263577  | 0,113523129 |  |
| 239995_at    | -              | 2,310153708  | 2,196649505  | 0,113504203 |  |
| 225106_s_at  | OGFOD1         | 3,920575295  | 3,807174423  | 0,113400872 |  |
| 1552919_at   | C4orf36        | -2,667025278 | -2,780313924 | 0,113288647 |  |
| 1553076_at   | OFCC1          | -2,667025278 | -2,780313924 | 0,113288647 |  |
| 1555002_at   | MGC39545       | -2,667025278 | -2,780313924 | 0,113288647 |  |
| 1560483_at   | -              | -2,667025278 | -2,780313924 | 0,113288647 |  |
| 1561556_at   | -              | -2,667025278 | -2,780313924 | 0,113288647 |  |
| 1562049_at   | LOC100507959   | -2,667025278 | -2,780313924 | 0,113288647 |  |
| 1563333_at   | -              | -2,667025278 | -2,780313924 | 0,113288647 |  |
| 1569072_s_at | ABCB5          | -2,667025278 | -2,780313924 | 0,113288647 |  |
| 1569391_at   | TNKS           | -2,667025278 | -2,780313924 | 0,113288647 |  |
| 1569753_at   | -              | -2,667025278 | -2,780313924 | 0,113288647 |  |
| 1570645_at   | -              | -2,667025278 | -2,780313924 | 0,113288647 |  |
| 205535_s_at  | PCDH7          | -2,667025278 | -2,780313924 | 0,113288647 |  |
| 209227_at    | TUSC3          | -2,667025278 | -2,780313924 | 0,113288647 |  |
| 214416_at    | -              | -2,667025278 | -2,780313924 | 0,113288647 |  |
| 229302_at    | TMEM178A       | -2,667025278 | -2,780313924 | 0,113288647 |  |
| 238392_at    | -              | -2,667025278 | -2,780313924 | 0,113288647 |  |
| 238553_at    | AGAP9 /// BMS1 | -2,667025278 | -2,780313924 | 0,113288647 |  |
| 239287_at    | -              | -2,667025278 | -2,780313924 | 0,113288647 |  |
| 239468_at    | MKX            | -2,667025278 | -2,780313924 | 0,113288647 |  |
| 240750_at    | -              | -2,667025278 | -2,780313924 | 0,113288647 |  |
| 241278_at    | -              | -2,667025278 | -2,780313924 | 0,113288647 |  |
| 243733_at    | -              | -2,667025278 | -2,780313924 | 0,113288647 |  |
| 244372_at    | -              | -2,667025278 | -2,780313924 | 0,113288647 |  |
| 244444_at    | LOC100653085 / | -2,667025278 | -2,780313924 | 0,113288647 |  |
| 244734_at    | MTHFSD         | -2,667025278 | -2,780313924 | 0,113288647 |  |
| 200633_at    | UBB            | 8,152949307  | 8,039715419  | 0,113233889 |  |
| 226729_at    | USP37          | 1,69307511   | 1,579853228  | 0,113221882 |  |
| 225932_s_at  | HNRNPA2B1      | 4,376357713  | 4,263136983  | 0,11322073  |  |
| 56829_at     | TRAPPC9        | 2,278289013  | 2,165083199  | 0,113205814 |  |
| 212674_s_at  | DHX30          | 2,993291442  | 2,880111483  | 0,113179959 |  |
| 219575_s_at  | COG8 /// PDF   | 2,993291442  | 2,880111483  | 0,113179959 |  |

|              |                  |              |              |             |
|--------------|------------------|--------------|--------------|-------------|
| 205304_s_at  | KCNJ8            | 0,317354302  | 0,204310755  | 0,113043546 |
| 217275_at    | TSSK2            | 0,317354302  | 0,204310755  | 0,113043546 |
| 217758_s_at  | TM9SF3           | 4,872528643  | 4,759522298  | 0,113006345 |
| 211566_x_at  | BRE              | 2,166283906  | 2,053299695  | 0,11298421  |
| 216026_s_at  | POLE             | 1,903621061  | 1,790660532  | 0,11296053  |
| 1557809_a_at | -                | -0,423248115 | -0,536087151 | 0,112839035 |
| 205864_at    | SLC7A4           | -0,423248115 | -0,536087151 | 0,112839035 |
| 215675_at    | -                | -0,423248115 | -0,536087151 | 0,112839035 |
| 219034_at    | PARP16           | -0,423248115 | -0,536087151 | 0,112839035 |
| 235724_at    | ACSS1            | -0,423248115 | -0,536087151 | 0,112839035 |
| 243849_at    | TMEM37           | -0,423248115 | -0,536087151 | 0,112839035 |
| 244234_at    | -                | -0,423248115 | -0,536087151 | 0,112839035 |
| 226059_at    | TOMM40L          | 1,954567604  | 1,841838775  | 0,112728829 |
| 231853_at    | TUBD1            | 1,954567604  | 1,841838775  | 0,112728829 |
| 224985_at    | NRAS             | 4,593269972  | 4,480569206  | 0,112700766 |
| 209479_at    | CCDC28A          | 3,171349466  | 3,058687544  | 0,112661922 |
| 214941_s_at  | PRPF40A          | 3,171349466  | 3,058687544  | 0,112661922 |
| 1553728_at   | LRRC43           | 2,834621043  | 2,721978587  | 0,112642456 |
| 235749_at    | UGGT2            | 1,394109935  | 1,281471383  | 0,112638552 |
| 1552417_a_at | NEDD1            | 0,702292136  | 0,589657387  | 0,112634749 |
| 226735_at    | TAPT1            | 0,702292136  | 0,589657387  | 0,112634749 |
| 1568859_a_at | SLC8A3           | 0,171847695  | 0,059218869  | 0,112628827 |
| 220501_at    | ACTL7A           | 0,171847695  | 0,059218869  | 0,112628827 |
| 226857_at    | ARHGEF19         | 0,171847695  | 0,059218869  | 0,112628827 |
| 231360_at    | C20orf141        | 0,171847695  | 0,059218869  | 0,112628827 |
| 229624_at    | OPA3             | 1,90937145   | 1,796776588  | 0,112594862 |
| 213698_at    | ZMYM6 /// ZMYM   | 2,933877275  | 2,821324225  | 0,11255305  |
| 1556024_at   | EME2             | 0,46522187   | 0,352836757  | 0,112385113 |
| 201330_at    | RARS             | 5,150463493  | 5,038079323  | 0,11238417  |
| 211071_s_at  | MLLT11           | 4,79776819   | 4,685434648  | 0,112333542 |
| 209567_at    | RRS1             | 5,023656689  | 4,911338525  | 0,112318164 |
| 1553169_at   | LRRN4            | -0,706943342 | -0,819238336 | 0,112294994 |
| 1562144_at   | -                | -0,706943342 | -0,819238336 | 0,112294994 |
| 206252_s_at  | AVPR1A           | -0,706943342 | -0,819238336 | 0,112294994 |
| 208585_at    | BTN2A3P          | -0,706943342 | -0,819238336 | 0,112294994 |
| 211224_s_at  | ABCB11           | -0,706943342 | -0,819238336 | 0,112294994 |
| 215039_at    | HS2ST1 /// LOC3  | -0,706943342 | -0,819238336 | 0,112294994 |
| 215337_at    | MED24            | -0,706943342 | -0,819238336 | 0,112294994 |
| 216090_x_at  | -                | -0,706943342 | -0,819238336 | 0,112294994 |
| 222782_s_at  | GMIP             | -0,706943342 | -0,819238336 | 0,112294994 |
| 223734_at    | MGARP            | -0,706943342 | -0,819238336 | 0,112294994 |
| 230002_at    | GPSM2            | -0,706943342 | -0,819238336 | 0,112294994 |
| 232698_at    | BPIFB2           | -0,706943342 | -0,819238336 | 0,112294994 |
| 234369_at    | OR4F16 /// OR4F  | -0,706943342 | -0,819238336 | 0,112294994 |
| 235670_at    | STX11            | -0,706943342 | -0,819238336 | 0,112294994 |
| 241823_at    | -                | -0,706943342 | -0,819238336 | 0,112294994 |
| 203101_s_at  | MGAT2            | 0,592200562  | 0,479907041  | 0,112293521 |
| 225628_s_at  | MLLT6            | 0,592200562  | 0,479907041  | 0,112293521 |
| 227699_at    | C14orf149        | 0,592200562  | 0,479907041  | 0,112293521 |
| 222673_x_at  | FAM122B          | 4,392357579  | 4,2801535    | 0,112204078 |
| 235381_at    | RSF1             | 1,709647566  | 1,59747851   | 0,112169055 |
| 208577_at    | HIST1H3A /// HIS | 2,331726354  | 2,21959457   | 0,112131784 |
| 216547_at    | -                | 1,917954284  | 1,805902329  | 0,112051955 |
| 223152_at    | PPP1R12C         | 1,917954284  | 1,805902329  | 0,112051955 |
| 227640_s_at  | RP9 /// RP9P     | 2,259277178  | 2,147243253  | 0,112033925 |
| 201718_s_at  | EPB41L2          | 1,655931423  | 1,543943227  | 0,111988196 |

|              |                |              |              |             |  |
|--------------|----------------|--------------|--------------|-------------|--|
| 226607_at    | C20orf194      | 1,655931423  | 1,543943227  | 0,111988196 |  |
| 1553538_s_at | COX1           | 8,447104578  | 8,335141653  | 0,111962926 |  |
| 211604_x_at  | HAP1           | 0,334552598  | 0,222599095  | 0,111953504 |  |
| 213085_s_at  | WWC1           | 0,334552598  | 0,222599095  | 0,111953504 |  |
| 226369_at    | LOC338799      | 0,334552598  | 0,222599095  | 0,111953504 |  |
| 228856_at    | ZNF747         | 0,334552598  | 0,222599095  | 0,111953504 |  |
| 225451_at    | GRIPAP1        | 1,820612054  | 1,708698295  | 0,111913759 |  |
| 204068_at    | STK3           | 3,299492934  | 3,187631636  | 0,111861298 |  |
| 200594_x_at  | HNRNPU         | 6,387174329  | 6,275463655  | 0,111710674 |  |
| 215093_at    | NSDHL          | 2,061726373  | 1,950068772  | 0,111657601 |  |
| 221079_s_at  | METTL2A /// ME | 2,825526235  | 2,713921281  | 0,111604954 |  |
| 213066_at    | RUSC2          | 1,542099044  | 1,43051703   | 0,111582013 |  |
| 211537_x_at  | MAP3K7         | 3,42923503   | 3,317734938  | 0,111500092 |  |
| 201192_s_at  | PITPNA         | 3,042527069  | 2,93104672   | 0,11148035  |  |
| 229577_at    | AGPAT6         | 0,606430281  | 0,495031851  | 0,111398431 |  |
| 219132_at    | PELI2          | -0,172274514 | -0,283667828 | 0,111393314 |  |
| 226991_at    | NFATC2         | -0,172274514 | -0,283667828 | 0,111393314 |  |
| 239718_at    | -              | -0,172274514 | -0,283667828 | 0,111393314 |  |
| 243285_at    | LOC283335      | -0,172274514 | -0,283667828 | 0,111393314 |  |
| 238652_at    | -              | 0,928678725  | 0,817300337  | 0,111378388 |  |
| 213235_at    | C16orf88       | 1,481627361  | 1,370274469  | 0,111352892 |  |
| 213344_s_at  | H2AFX          | 1,829737795  | 1,718396606  | 0,111341189 |  |
| 238541_at    | C21orf58       | 1,829737795  | 1,718396606  | 0,111341189 |  |
| 229980_s_at  | SNX5           | 5,63729661   | 5,525968169  | 0,111328441 |  |
| 223258_s_at  | G2E3           | 2,905386372  | 2,794067719  | 0,111318653 |  |
| 219598_s_at  | RWDD1          | 4,244385102  | 4,133220924  | 0,111164178 |  |
| 223188_at    | SMG9           | 1,726031811  | 1,614891062  | 0,111140749 |  |
| 228743_at    | TXNDC17        | 1,726031811  | 1,614891062  | 0,111140749 |  |
| 201829_at    | NET1           | 4,497501866  | 4,386375749  | 0,111126117 |  |
| 202125_s_at  | TRAK2          | 2,549899391  | 2,438805127  | 0,111094264 |  |
| 208478_s_at  | BAX            | 1,348276312  | 1,23718272   | 0,111093592 |  |
| 226350_at    | CHML           | 3,90985831   | 3,798818761  | 0,11103955  |  |
| 219211_at    | USP18          | 2,156646206  | 2,045615873  | 0,111030333 |  |
| 201935_s_at  | EIF4G3         | 2,277177578  | 2,166264721  | 0,110912857 |  |
| 209117_at    | WBP2           | 1,937784532  | 1,826973888  | 0,110810644 |  |
| 202142_at    | COPS8          | 3,406034785  | 3,295230443  | 0,110804342 |  |
| 205244_s_at  | SLC13A3        | 0,03125738   | -0,079522948 | 0,110780328 |  |
| 238864_at    | VWA3A          | 0,03125738   | -0,079522948 | 0,110780328 |  |
| 244368_x_at  | -              | 0,03125738   | -0,079522948 | 0,110780328 |  |
| 226381_at    | LOC100506748   | 2,077135162  | 1,966439221  | 0,110695941 |  |
| 211185_s_at  | SF3B1          | 5,986946417  | 5,876251039  | 0,110695378 |  |
| 1552816_at   | NXNL2          | -2,779459409 | -2,89013181  | 0,110672402 |  |
| 1554676_at   | SRGN           | -2,779459409 | -2,89013181  | 0,110672402 |  |
| 1555517_at   | GABRG3         | -2,779459409 | -2,89013181  | 0,110672402 |  |
| 1556883_a_at | LOC440896      | -2,779459409 | -2,89013181  | 0,110672402 |  |
| 1561137_s_at | GYPE           | -2,779459409 | -2,89013181  | 0,110672402 |  |
| 1561737_at   | -              | -2,779459409 | -2,89013181  | 0,110672402 |  |
| 1562587_at   | CLNK           | -2,779459409 | -2,89013181  | 0,110672402 |  |
| 1565699_at   | HECTD2         | -2,779459409 | -2,89013181  | 0,110672402 |  |
| 1566267_at   | -              | -2,779459409 | -2,89013181  | 0,110672402 |  |
| 1567856_x_at | ZNF29P         | -2,779459409 | -2,89013181  | 0,110672402 |  |
| 1569272_at   | PIK3C3         | -2,779459409 | -2,89013181  | 0,110672402 |  |
| 1570289_at   | LOC646736      | -2,779459409 | -2,89013181  | 0,110672402 |  |
| 202508_s_at  | SNAP25         | -2,779459409 | -2,89013181  | 0,110672402 |  |
| 203798_s_at  | VSNL1          | -2,779459409 | -2,89013181  | 0,110672402 |  |
| 206545_at    | CD28           | -2,779459409 | -2,89013181  | 0,110672402 |  |

|              |                 |              |              |             |  |
|--------------|-----------------|--------------|--------------|-------------|--|
| 231717_s_at  | ZNF226          | -2,779459409 | -2,89013181  | 0,110672402 |  |
| 233120_at    | -               | -2,779459409 | -2,89013181  | 0,110672402 |  |
| 233346_at    | -               | -2,779459409 | -2,89013181  | 0,110672402 |  |
| 233615_at    | CGA             | -2,779459409 | -2,89013181  | 0,110672402 |  |
| 233853_at    | -               | -2,779459409 | -2,89013181  | 0,110672402 |  |
| 235955_at    | MARVELD2        | -2,779459409 | -2,89013181  | 0,110672402 |  |
| 238224_at    | -               | -2,779459409 | -2,89013181  | 0,110672402 |  |
| 240749_at    | LOC100505862    | -2,779459409 | -2,89013181  | 0,110672402 |  |
| 241744_x_at  | -               | -2,779459409 | -2,89013181  | 0,110672402 |  |
| 242631_x_at  | DLC1            | -2,779459409 | -2,89013181  | 0,110672402 |  |
| 242762_s_at  | FAM171B         | -2,779459409 | -2,89013181  | 0,110672402 |  |
| 244405_s_at  | -               | -2,779459409 | -2,89013181  | 0,110672402 |  |
| 244503_at    | -               | -2,779459409 | -2,89013181  | 0,110672402 |  |
| 244657_at    | -               | -2,779459409 | -2,89013181  | 0,110672402 |  |
| 1553167_a_at | SEPSECS         | 0,735041319  | 0,624460759  | 0,11058056  |  |
| 207547_s_at  | FAM107A /// LOC | 0,735041319  | 0,624460759  | 0,11058056  |  |
| 230019_s_at  | PTCHD2          | 0,735041319  | 0,624460759  | 0,11058056  |  |
| 232860_x_at  | RBM41           | 0,735041319  | 0,624460759  | 0,11058056  |  |
| 238333_s_at  | MTG1            | 0,735041319  | 0,624460759  | 0,11058056  |  |
| 214501_s_at  | H2AFY           | 3,842326541  | 3,731768909  | 0,110557633 |  |
| 229949_at    | -               | 2,589836943  | 2,479296438  | 0,110540506 |  |
| 212484_at    | FAM89B          | 1,735773781  | 1,6252386    | 0,110535181 |  |
| 228775_at    | EMC3            | 1,844820248  | 1,73441697   | 0,110403278 |  |
| 1561421_a_at | -               | 0,359971644  | 0,249604176  | 0,110367468 |  |
| 1569321_at   | -               | 0,359971644  | 0,249604176  | 0,110367468 |  |
| 205232_s_at  | PAFAH2          | 0,359971644  | 0,249604176  | 0,110367468 |  |
| 219617_at    | CAMKMT          | 0,359971644  | 0,249604176  | 0,110367468 |  |
| 238590_x_at  | TMEM107         | 0,359971644  | 0,249604176  | 0,110367468 |  |
| 37966_at     | PARVB           | 1,398205319  | 1,287998959  | 0,11020636  |  |
| 47608_at     | TJAP1           | 3,458946151  | 3,348766952  | 0,110179198 |  |
| 1558954_at   | SNORA78         | 1,795990708  | 1,685812099  | 0,110178608 |  |
| 200946_x_at  | GLUD1           | 4,206936942  | 4,096815476  | 0,110121466 |  |
| 218785_s_at  | RABL5           | 0,627515113  | 0,51742585   | 0,110089263 |  |
| 229541_at    | -               | 0,627515113  | 0,51742585   | 0,110089263 |  |
| 205321_at    | EIF2S3          | 5,739893061  | 5,629826771  | 0,11006629  |  |
| 201512_s_at  | TOMM70A         | 3,997499421  | 3,887456383  | 0,110043037 |  |
| 209314_s_at  | HBS1L           | 4,444279108  | 4,334242016  | 0,110037092 |  |
| 203856_at    | VRK1            | 4,895163777  | 4,785127613  | 0,110036164 |  |
| 235109_at    | ZBED3           | 0,503742507  | 0,393761504  | 0,109981003 |  |
| 244758_at    | SCAND3          | 0,503742507  | 0,393761504  | 0,109981003 |  |
| 201834_at    | PRKAB1          | 2,568189989  | 2,458228496  | 0,109961494 |  |
| 1552646_at   | IL11RA          | -0,148196756 | -0,258114234 | 0,109917477 |  |
| 207281_x_at  | VCX2            | -0,148196756 | -0,258114234 | 0,109917477 |  |
| 224393_s_at  | CECR6           | -0,148196756 | -0,258114234 | 0,109917477 |  |
| 231246_at    | -               | -0,148196756 | -0,258114234 | 0,109917477 |  |
| 243305_at    | -               | -0,148196756 | -0,258114234 | 0,109917477 |  |
| 202430_s_at  | PLSCR1          | 3,773843756  | 3,663961904  | 0,109881852 |  |
| 218240_at    | NKIRAS2         | 1,85379461   | 1,743944487  | 0,109850122 |  |
| 203149_at    | PVRL2           | 2,134723057  | 2,024923328  | 0,109799729 |  |
| 228070_at    | PPP2R5E         | 1,369290453  | 1,259496994  | 0,109793458 |  |
| 209599_s_at  | PRUNE           | 0,747935635  | 0,638150376  | 0,109785259 |  |
| 212437_at    | CENPB           | 0,747935635  | 0,638150376  | 0,109785259 |  |
| 239411_at    | -               | 0,747935635  | 0,638150376  | 0,109785259 |  |
| 202620_s_at  | PLOD2           | 3,617524043  | 3,507749374  | 0,10977467  |  |
| 208953_at    | LARP4B          | 3,19743497   | 3,087661492  | 0,109773478 |  |
| 215040_at    | RNASEH2B        | 0,95671774   | 0,847075464  | 0,109642276 |  |

|              |                  |              |              |             |  |
|--------------|------------------|--------------|--------------|-------------|--|
| 235546_at    | SPINT1           | 0,95671774   | 0,847075464  | 0,109642276 |  |
| 202118_s_at  | CPNE3            | 3,072307152  | 2,962671751  | 0,109635401 |  |
| 212377_s_at  | NOTCH2           | 2,573632254  | 2,464004877  | 0,109627377 |  |
| 1554097_a_at | MIR31HG          | -0,655928373 | -0,765504029 | 0,109575656 |  |
| 1568734_a_at | HS1BP3           | -0,655928373 | -0,765504029 | 0,109575656 |  |
| 1570171_at   | -                | -0,655928373 | -0,765504029 | 0,109575656 |  |
| 205049_s_at  | CD79A            | -0,655928373 | -0,765504029 | 0,109575656 |  |
| 206150_at    | CD27             | -0,655928373 | -0,765504029 | 0,109575656 |  |
| 206171_at    | ADORA3           | -0,655928373 | -0,765504029 | 0,109575656 |  |
| 210746_s_at  | EPB42            | -0,655928373 | -0,765504029 | 0,109575656 |  |
| 213195_at    | C17orf108        | -0,655928373 | -0,765504029 | 0,109575656 |  |
| 213949_s_at  | DOHH             | -0,655928373 | -0,765504029 | 0,109575656 |  |
| 214535_s_at  | ADAMTS2          | -0,655928373 | -0,765504029 | 0,109575656 |  |
| 222677_x_at  | -                | -0,655928373 | -0,765504029 | 0,109575656 |  |
| 229556_at    | LOC100288893     | -0,655928373 | -0,765504029 | 0,109575656 |  |
| 232973_at    | DOCK1            | -0,655928373 | -0,765504029 | 0,109575656 |  |
| 234832_at    | ANTXR1           | -0,655928373 | -0,765504029 | 0,109575656 |  |
| 239198_at    | EZH1             | -0,655928373 | -0,765504029 | 0,109575656 |  |
| 203519_s_at  | UPF2             | 3,373122675  | 3,263564154  | 0,109558521 |  |
| 237403_at    | GFI1B            | 5,051551426  | 4,942014748  | 0,109536678 |  |
| 211999_at    | H3F3A /// H3F3B  | 6,498417648  | 6,388994204  | 0,109423444 |  |
| 204343_at    | ABCA3            | 1,224581536  | 1,115234684  | 0,109346851 |  |
| 1566146_x_at | -                | 0,376672223  | 0,26733076   | 0,109341464 |  |
| 219541_at    | LIME1 /// SLC2A4 | 0,376672223  | 0,26733076   | 0,109341464 |  |
| 227385_at    | PPAPDC2          | 0,376672223  | 0,26733076   | 0,109341464 |  |
| 239490_at    | COA1             | 0,376672223  | 0,26733076   | 0,109341464 |  |
| 202969_at    | DYRK2            | 1,578645857  | 1,469325098  | 0,109320759 |  |
| 232149_s_at  | NSMAF            | 3,579258128  | 3,469974737  | 0,109283391 |  |
| 210529_s_at  | FAM115A /// LOC  | 1,699726954  | 1,590454215  | 0,109272739 |  |
| 214315_x_at  | CALR             | 4,898781575  | 4,789543023  | 0,109238552 |  |
| 222470_s_at  | UQCC             | 0,641402394  | 0,532164371  | 0,109238024 |  |
| 221521_s_at  | GIN52            | 4,360703168  | 4,251494565  | 0,109208603 |  |
| 204930_s_at  | BNIP1            | 2,102456302  | 1,993317152  | 0,10913915  |  |
| 203357_s_at  | CAPN7            | 2,840652551  | 2,731588328  | 0,109064223 |  |
| 201671_x_at  | USP14            | 3,689469311  | 3,580454966  | 0,109014345 |  |
| 209580_s_at  | MBD4             | 4,732770466  | 4,623770256  | 0,10900021  |  |
| 219080_s_at  | CTPS2            | 1,868628927  | 1,759685182  | 0,108943745 |  |
| 223054_at    | DNAJB11          | 4,768801946  | 4,659868459  | 0,108933488 |  |
| 227919_at    | UCA1             | 6,017883727  | 5,908998287  | 0,10888544  |  |
| 225145_at    | NCOA5            | 3,085065712  | 2,976208448  | 0,108857264 |  |
| 202337_at    | PMF1             | 2,896728217  | 2,787940144  | 0,108788072 |  |
| 222730_s_at  | ZDHHC2           | 3,292909151  | 3,184136378  | 0,108772774 |  |
| 1552618_at   | STX6             | 2,491678455  | 2,382985886  | 0,108692569 |  |
| 204603_at    | EXO1             | 2,422991296  | 2,314300277  | 0,108691019 |  |
| 218936_s_at  | CCDC59           | 4,05440026   | 3,945725977  | 0,108674283 |  |
| 1554701_a_at | TBC1D16          | -0,352951799 | -0,461594427 | 0,108642628 |  |
| 1561037_a_at | -                | -0,352951799 | -0,461594427 | 0,108642628 |  |
| 216741_at    | -                | -0,352951799 | -0,461594427 | 0,108642628 |  |
| 232042_at    | TTYH2            | -0,352951799 | -0,461594427 | 0,108642628 |  |
| 1560019_at   | MGC11082         | 0,767063567  | 0,658444279  | 0,108619288 |  |
| 228663_x_at  | FIZ1             | 0,767063567  | 0,658444279  | 0,108619288 |  |
| 218117_at    | RBX1             | 5,837467257  | 5,728908813  | 0,108558445 |  |
| 201245_s_at  | OTUB1            | 3,850569363  | 3,742106442  | 0,108462921 |  |
| 202442_at    | AP3S1            | 4,939746973  | 4,831294479  | 0,108452494 |  |
| 201737_s_at  | 06.03.15         | 3,976425635  | 3,86798237   | 0,108443265 |  |
| 217379_at    | -                | 5,161347762  | 5,05300713   | 0,108340632 |  |

|              |                 |              |              |             |
|--------------|-----------------|--------------|--------------|-------------|
| 223342_at    | RRM2B           | 2,879254447  | 2,770953871  | 0,108300576 |
| 207428_x_at  | CDK11A /// CDK1 | 1,716223609  | 1,60795124   | 0,108272369 |
| 224366_s_at  | REPS1           | 3,394805732  | 3,28656411   | 0,108241622 |
| 222044_at    | PCIF1           | 1,596577845  | 1,488344553  | 0,108233293 |
| 208540_x_at  | -               | 3,050355245  | 2,942125533  | 0,108229712 |
| 242608_x_at  | FAM161B         | 3,004080279  | 2,895866687  | 0,108213592 |
| 226314_at    | CHST14          | 1,774096855  | 1,665902186  | 0,10819467  |
| 201166_s_at  | PUM1            | 5,492057836  | 5,38389617   | 0,108161666 |
| 207002_s_at  | PLAGL1          | 4,550671723  | 4,442554164  | 0,108117559 |
| 1554170_a_at | MBLAC1          | 1,163336153  | 1,055274826  | 0,108061327 |
| 212619_at    | TMEM194A        | 0,984222186  | 0,876248481  | 0,107973705 |
| 229210_at    | RNASEH2B        | 0,984222186  | 0,876248481  | 0,107973705 |
| 204256_at    | ELOVL6          | 4,511983428  | 4,404011141  | 0,107972287 |
| 1555032_at   | RGS12           | -0,622910612 | -0,730778808 | 0,107868196 |
| 1559902_at   | MKL1            | -0,622910612 | -0,730778808 | 0,107868196 |
| 1562436_at   | CARS-AS1        | -0,622910612 | -0,730778808 | 0,107868196 |
| 233100_at    | EEPD1           | -0,622910612 | -0,730778808 | 0,107868196 |
| 233342_at    | LOC100134040    | -0,622910612 | -0,730778808 | 0,107868196 |
| 236298_at    | PDSS1           | -0,622910612 | -0,730778808 | 0,107868196 |
| 237594_at    | -               | -0,622910612 | -0,730778808 | 0,107868196 |
| 240430_at    | KCMF1           | -0,622910612 | -0,730778808 | 0,107868196 |
| 243151_at    | LOC100506282    | -0,622910612 | -0,730778808 | 0,107868196 |
| 244876_at    | -               | -0,622910612 | -0,730778808 | 0,107868196 |
| 223331_s_at  | DDX20           | 3,166555554  | 3,058687544  | 0,10786801  |
| 235143_at    | SLC10A7         | 0,779676066  | 0,67181667   | 0,107859396 |
| 224555_x_at  | IL37            | 0,401366113  | 0,293518836  | 0,107847277 |
| 226894_at    | SLC35A3         | 2,571820446  | 2,464004877  | 0,107815569 |
| 212574_x_at  | C19orf6         | 1,40228911   | 1,294497133  | 0,107791977 |
| 201497_x_at  | MYH11           | -0,112808516 | -0,220592223 | 0,107783707 |
| 205853_at    | ZBTB7B          | -0,112808516 | -0,220592223 | 0,107783707 |
| 236424_at    | CEP250          | -0,112808516 | -0,220592223 | 0,107783707 |
| 243953_at    | FADS2           | -0,112808516 | -0,220592223 | 0,107783707 |
| 244178_at    | COMMD7          | -0,112808516 | -0,220592223 | 0,107783707 |
| 232033_at    | USP37           | 1,835789711  | 1,728030156  | 0,107759554 |
| 207129_at    | CA5B            | 0,541261317  | 0,433557298  | 0,107704019 |
| 224950_at    | PTGFRN          | 0,541261317  | 0,433557298  | 0,107704019 |
| 242600_at    | FRMD3           | 0,541261317  | 0,433557298  | 0,107704019 |
| 228131_at    | ERCC1           | 1,251994932  | 1,144305291  | 0,107689641 |
| 1569030_s_at | NUB1            | 2,605861638  | 2,498185745  | 0,107675893 |
| 203076_s_at  | SMAD2           | 3,232262672  | 3,124599694  | 0,107662977 |
| 217911_s_at  | BAG3            | 3,013454777  | 2,905803877  | 0,1076509   |
| 232991_at    | -               | 0,083054335  | -0,024572586 | 0,107626921 |
| 239596_at    | SLC30A7         | 0,083054335  | -0,024572586 | 0,107626921 |
| 228622_s_at  | DNAJC4          | 1,331241794  | 1,223626587  | 0,107615206 |
| 215691_x_at  | HSPB11          | 5,197340607  | 5,08974239   | 0,107598218 |
| 221803_s_at  | NRBF2           | 1,607231019  | 1,499637023  | 0,107593996 |
| 204749_at    | NAP1L3          | 4,255150375  | 4,147649355  | 0,107501021 |
| 225617_at    | ODF2            | 2,173470163  | 2,066015817  | 0,107454346 |
| 212558_at    | SPRY1           | 3,408067074  | 3,300620584  | 0,10744649  |
| 227447_at    | SKIV2L2         | 3,408067074  | 3,300620584  | 0,10744649  |
| 224561_s_at  | MORF4L1         | 6,082774913  | 5,975380244  | 0,107394669 |
| 209130_at    | SNAP23          | 5,535001352  | 5,427660949  | 0,107340403 |
| 213398_s_at  | SDR39U1         | 3,480351894  | 3,373018423  | 0,10733347  |
| 201272_at    | AKR1B1          | 5,391902301  | 5,284574019  | 0,107328282 |
| 207467_x_at  | CAST            | 4,144312047  | 4,037037849  | 0,107274198 |
| 219037_at    | RRP15           | 3,857278636  | 3,75000829   | 0,107270345 |

|              |                 |              |              |             |  |
|--------------|-----------------|--------------|--------------|-------------|--|
| 209120_at    | NR2F2           | 3,674351634  | 3,56709884   | 0,107252794 |  |
| 1557502_at   | PCCB            | -1,047650486 | -1,154897679 | 0,107247193 |  |
| 1559550_s_at | -               | -1,047650486 | -1,154897679 | 0,107247193 |  |
| 1564074_at   | -               | -1,047650486 | -1,154897679 | 0,107247193 |  |
| 1568706_s_at | LOC100653271 /  | -1,047650486 | -1,154897679 | 0,107247193 |  |
| 1569097_at   | TP53BP1         | -1,047650486 | -1,154897679 | 0,107247193 |  |
| 206882_at    | SLC1A6          | -1,047650486 | -1,154897679 | 0,107247193 |  |
| 224297_s_at  | SPTBN4          | -1,047650486 | -1,154897679 | 0,107247193 |  |
| 228874_at    | PHLDB3          | -1,047650486 | -1,154897679 | 0,107247193 |  |
| 230622_at    | MLLT4           | -1,047650486 | -1,154897679 | 0,107247193 |  |
| 232709_at    | -               | -1,047650486 | -1,154897679 | 0,107247193 |  |
| 240314_at    | -               | -1,047650486 | -1,154897679 | 0,107247193 |  |
| 240357_at    | -               | -1,047650486 | -1,154897679 | 0,107247193 |  |
| 242011_at    | -               | -1,047650486 | -1,154897679 | 0,107247193 |  |
| 214017_s_at  | DHX34           | 1,549482847  | 1,442269454  | 0,107213393 |  |
| 222644_s_at  | GLT25D1         | 1,897847661  | 1,790660532  | 0,107187129 |  |
| 213343_s_at  | GDPD5           | 0,67554678   | 0,568365095  | 0,107181685 |  |
| 244738_at    | BRWD3           | 0,67554678   | 0,568365095  | 0,107181685 |  |
| 218481_at    | EXOSC5          | 3,260656977  | 3,153484076  | 0,107172901 |  |
| 236067_at    | -               | 1,261018186  | 1,153866761  | 0,107151424 |  |
| 225376_at    | C20orf11        | 4,575296564  | 4,468168179  | 0,107128385 |  |
| 226371_at    | KDM5A           | 2,261526912  | 2,154405725  | 0,107121186 |  |
| 214864_s_at  | GRHPR           | 3,466766854  | 3,359653127  | 0,107113728 |  |
| 203025_at    | NAA10           | 3,069741844  | 2,962671751  | 0,107070094 |  |
| 226290_at    | BDP1            | 3,450096885  | 3,343031718  | 0,107065167 |  |
| 201566_x_at  | ID2             | 1,485482016  | 1,378453643  | 0,107028372 |  |
| 204867_at    | GCHFR           | 1,485482016  | 1,378453643  | 0,107028372 |  |
| 236129_at    | GALNT5          | 2,520143371  | 2,413157372  | 0,106985999 |  |
| 230257_s_at  | TSEN15          | 2,303618506  | 2,196649505  | 0,106969001 |  |
| 204044_at    | QPRT            | 2,001086023  | 1,894118818  | 0,106967205 |  |
| 227324_at    | ADCK4           | 1,094335495  | 0,987376598  | 0,106958897 |  |
| 200821_at    | LAMP2           | 4,037433122  | 3,930508802  | 0,10692432  |  |
| 221579_s_at  | NUDT3 /// RPS10 | 2,710020346  | 2,603119255  | 0,106901091 |  |
| 230138_at    | NCS1            | 0,417596971  | 0,310717132  | 0,106879839 |  |
| 238061_at    | LGI3            | 0,417596971  | 0,310717132  | 0,106879839 |  |
| 223022_s_at  | VTA1            | 4,265835914  | 4,158970399  | 0,106865515 |  |
| 1553191_at   | DST /// LOC1006 | -2,930741289 | -3,037500868 | 0,106759579 |  |
| 1555519_at   | -               | -2,930741289 | -3,037500868 | 0,106759579 |  |
| 1556158_at   | FAM154B         | -2,930741289 | -3,037500868 | 0,106759579 |  |
| 1556491_at   | -               | -2,930741289 | -3,037500868 | 0,106759579 |  |
| 1559341_at   | -               | -2,930741289 | -3,037500868 | 0,106759579 |  |
| 1560098_at   | -               | -2,930741289 | -3,037500868 | 0,106759579 |  |
| 1560526_at   | MAGI2-IT1       | -2,930741289 | -3,037500868 | 0,106759579 |  |
| 1561264_at   | -               | -2,930741289 | -3,037500868 | 0,106759579 |  |
| 1561328_at   | -               | -2,930741289 | -3,037500868 | 0,106759579 |  |
| 1562566_at   | TRAF3IP2-AS1    | -2,930741289 | -3,037500868 | 0,106759579 |  |
| 1563332_at   | -               | -2,930741289 | -3,037500868 | 0,106759579 |  |
| 1567378_x_at | DNAH1           | -2,930741289 | -3,037500868 | 0,106759579 |  |
| 1569408_at   | EIF2C4          | -2,930741289 | -3,037500868 | 0,106759579 |  |
| 1569788_at   | ST8SIA1         | -2,930741289 | -3,037500868 | 0,106759579 |  |
| 1569969_a_at | UNC13C          | -2,930741289 | -3,037500868 | 0,106759579 |  |
| 1570584_at   | MPZL3           | -2,930741289 | -3,037500868 | 0,106759579 |  |
| 207479_at    | -               | -2,930741289 | -3,037500868 | 0,106759579 |  |
| 210330_at    | SGCD            | -2,930741289 | -3,037500868 | 0,106759579 |  |
| 211054_at    | INVS            | -2,930741289 | -3,037500868 | 0,106759579 |  |
| 224363_at    | -               | -2,930741289 | -3,037500868 | 0,106759579 |  |

|              |                 |              |              |             |  |
|--------------|-----------------|--------------|--------------|-------------|--|
| 225571_at    | LIFR            | -2,930741289 | -3,037500868 | 0,106759579 |  |
| 232673_at    | LRRFIP2         | -2,930741289 | -3,037500868 | 0,106759579 |  |
| 236532_at    | C11orf87        | -2,930741289 | -3,037500868 | 0,106759579 |  |
| 237116_at    | LOC646903       | -2,930741289 | -3,037500868 | 0,106759579 |  |
| 237374_at    | -               | -2,930741289 | -3,037500868 | 0,106759579 |  |
| 238149_at    | ZNF818P         | -2,930741289 | -3,037500868 | 0,106759579 |  |
| 244004_at    | -               | -2,930741289 | -3,037500868 | 0,106759579 |  |
| 244888_at    | -               | -2,930741289 | -3,037500868 | 0,106759579 |  |
| 209628_at    | NXT2            | 3,345817457  | 3,239069096  | 0,106748361 |  |
| 214438_at    | HLX             | 0,798390451  | 0,691645685  | 0,106744766 |  |
| 210933_s_at  | FSCN1 /// LOC10 | 2,559073676  | 2,452428893  | 0,106644783 |  |
| 221777_at    | C12orf52        | 2,882181479  | 2,775606361  | 0,106575118 |  |
| 1559755_at   | C21orf49        | -0,089689931 | -0,19610998  | 0,106420049 |  |
| 1569095_at   | LOC731424       | -0,089689931 | -0,19610998  | 0,106420049 |  |
| 210476_s_at  | PRLR            | -0,089689931 | -0,19610998  | 0,106420049 |  |
| 213278_at    | MTMR9           | 2,688444421  | 2,582026171  | 0,10641825  |  |
| 234980_at    | TMEM56          | 0,911589958  | 0,805216064  | 0,106373894 |  |
| 203442_x_at  | EML3            | 1,011212064  | 0,904843258  | 0,106368805 |  |
| 203705_s_at  | FZD7            | 1,011212064  | 0,904843258  | 0,106368805 |  |
| 212305_s_at  | MIA3            | 1,011212064  | 0,904843258  | 0,106368805 |  |
| 206005_s_at  | KIAA1009        | 1,352503698  | 1,246149888  | 0,10635381  |  |
| 222502_s_at  | UFM1            | 2,427005622  | 2,320681318  | 0,106324304 |  |
| 219258_at    | TIPIN           | 3,059434754  | 2,953119918  | 0,106314836 |  |
| 201628_s_at  | RRAGA           | 4,024244326  | 3,917937882  | 0,106306444 |  |
| 203622_s_at  | PNO1            | 4,777867415  | 4,671564559  | 0,106302856 |  |
| 223144_s_at  | AKIRIN2         | 4,060873315  | 3,954643074  | 0,106230241 |  |
| 35436_at     | GOLGA2          | 0,692320641  | 0,586130423  | 0,106190218 |  |
| 228927_at    | ZNF397          | 2,151803104  | 2,045615873  | 0,106187231 |  |
| 225788_at    | RRP36           | 4,119101006  | 4,012941072  | 0,106159934 |  |
| 228661_s_at  | LOC100506029 /  | 1,567778694  | 1,461646549  | 0,106132144 |  |
| 215832_x_at  | PICALM          | 2,752227654  | 2,646096941  | 0,106130713 |  |
| 219855_at    | NUDT11          | 3,086335384  | 2,980244813  | 0,106090571 |  |
| 1557910_at   | HSP90AB1        | 6,919648195  | 6,813558862  | 0,106089334 |  |
| 201327_s_at  | CCT6A           | 5,775355733  | 5,669321722  | 0,106034011 |  |
| 211028_s_at  | KHK             | 0,810733188  | 0,704715219  | 0,106017969 |  |
| 233065_at    | RNF207          | 0,810733188  | 0,704715219  | 0,106017969 |  |
| 1555851_s_at | SEPW1           | 5,612394725  | 5,506392234  | 0,106002491 |  |
| 1560451_at   | -               | 0,695652136  | 0,589657387  | 0,105994749 |  |
| 211656_x_at  | HLA-DQB1 /// LO | 0,695652136  | 0,589657387  | 0,105994749 |  |
| 219032_x_at  | OPN3            | 0,695652136  | 0,589657387  | 0,105994749 |  |
| 239024_at    | ZNF148          | 0,695652136  | 0,589657387  | 0,105994749 |  |
| 40225_at     | GAK             | 3,659500438  | 3,553617909  | 0,105882528 |  |
| 225524_at    | ANTXR2          | 3,112743591  | 3,006869115  | 0,105874476 |  |
| 227846_at    | GPR176          | 1,283332461  | 1,177496821  | 0,10583564  |  |
| 235134_at    | -               | 2,159061673  | 2,053299695  | 0,105761978 |  |
| 203693_s_at  | E2F3            | 4,654470045  | 4,548745669  | 0,105724376 |  |
| 210457_x_at  | HMGA1 /// HMGA  | 1,575032557  | 1,469325098  | 0,105707459 |  |
| 223662_x_at  | DDX59           | 1,575032557  | 1,469325098  | 0,105707459 |  |
| 208927_at    | SPOP            | 3,508091848  | 3,402394519  | 0,105697329 |  |
| 1554868_s_at | PCNP            | 4,402076958  | 4,296432174  | 0,105644784 |  |
| 219981_x_at  | ZNF587 /// ZNF5 | 2,402750389  | 2,297144887  | 0,105605502 |  |
| 205077_s_at  | PIGF            | 3,747601714  | 3,642048499  | 0,105553215 |  |
| 238453_at    | FGFBP3          | 2,288253583  | 2,182705233  | 0,10554835  |  |
| 214210_at    | SLC25A17        | 1,926486359  | 1,820984782  | 0,105501578 |  |
| 224975_at    | NFIA            | 1,119359127  | 1,013870809  | 0,105488318 |  |
| 226600_at    | TMTC3           | 1,119359127  | 1,013870809  | 0,105488318 |  |



|              |                |              |              |             |  |
|--------------|----------------|--------------|--------------|-------------|--|
| 212330_at    | TFDP1          | 4,763255815  | 4,657769855  | 0,10548596  |  |
| 211528_x_at  | HLA-G          | 5,196458993  | 5,090987226  | 0,105471767 |  |
| 240318_at    | AFMID          | 0,44160593   | 0,336136178  | 0,105469752 |  |
| 1554251_at   | HP1BP3         | 2,734521183  | 2,629059192  | 0,105461991 |  |
| 200948_at    | MLF2           | 4,131454119  | 4,026016313  | 0,105437806 |  |
| 207198_s_at  | LIMS1          | 4,538199871  | 4,432769076  | 0,105430795 |  |
| 218111_s_at  | CMAS           | 1,442503549  | 1,337086025  | 0,105417524 |  |
| 221029_s_at  | WNT5B          | 1,442503549  | 1,337086025  | 0,105417524 |  |
| 209054_s_at  | WHSC1          | 3,209137871  | 3,103784293  | 0,105353579 |  |
| 1556361_s_at | ANKRD13C       | -0,57445847  | -0,679763839 | 0,105305369 |  |
| 1559477_s_at | MEIS1          | -0,57445847  | -0,679763839 | 0,105305369 |  |
| 1564897_at   | TNR            | -0,57445847  | -0,679763839 | 0,105305369 |  |
| 225165_at    | PPP1R1B        | -0,57445847  | -0,679763839 | 0,105305369 |  |
| 226655_at    | STX17          | -0,57445847  | -0,679763839 | 0,105305369 |  |
| 231032_at    | LOC286071      | -0,57445847  | -0,679763839 | 0,105305369 |  |
| 235681_at    | -              | -0,57445847  | -0,679763839 | 0,105305369 |  |
| 238235_at    | -              | -0,57445847  | -0,679763839 | 0,105305369 |  |
| 243343_at    | -              | -0,57445847  | -0,679763839 | 0,105305369 |  |
| 244191_at    | RPLP1          | -0,57445847  | -0,679763839 | 0,105305369 |  |
| 231094_s_at  | MTHFD1L        | 1,210676994  | 1,105412836  | 0,105264158 |  |
| 208808_s_at  | HMGB2          | 7,085335131  | 6,980109941  | 0,10522519  |  |
| 204132_s_at  | FOXO3 /// FOXO | 1,932146506  | 1,826973888  | 0,105172617 |  |
| 216338_s_at  | YIPF3          | 2,294858597  | 2,189694216  | 0,105164381 |  |
| 212683_at    | SLC25A44       | 1,649074067  | 1,543943227  | 0,105130839 |  |
| 226180_at    | WDR36          | 3,617524043  | 3,512402411  | 0,105121632 |  |
| 201252_at    | PSMC4          | 5,963472883  | 5,858361335  | 0,105111548 |  |
| 225890_at    | C20orf72       | 4,60172953   | 4,496626742  | 0,105102788 |  |
| 204361_s_at  | SKAP2          | 1,296557217  | 1,191491281  | 0,105065936 |  |
| 203007_x_at  | LYPLA1         | 4,788632316  | 4,683579237  | 0,105053079 |  |
| 219274_at    | TSPAN12        | 2,553576109  | 2,448549499  | 0,10502661  |  |
| 238183_at    | -              | 0,82905153   | 0,724100169  | 0,104951361 |  |
| 204238_s_at  | C6orf108       | 2,035673598  | 1,930732138  | 0,104941461 |  |
| 226509_at    | ZNF641         | 2,035673598  | 1,930732138  | 0,104941461 |  |
| 212282_at    | TMEM97         | 4,760076998  | 4,655247494  | 0,104829504 |  |
| 225967_s_at  | C17orf89       | 4,548830831  | 4,44401622   | 0,104814611 |  |
| 206844_at    | FBP2           | -0,285837228 | -0,39061235  | 0,104775122 |  |
| 207355_at    | SLC1A7         | -0,285837228 | -0,39061235  | 0,104775122 |  |
| 229054_at    | ZFP36L1        | -0,285837228 | -0,39061235  | 0,104775122 |  |
| 242443_at    | EML5           | -0,285837228 | -0,39061235  | 0,104775122 |  |
| 208731_at    | RAB2A          | 4,647605722  | 4,542844647  | 0,104761075 |  |
| 219626_at    | MAP7D3         | 1,454352496  | 1,349621332  | 0,104731164 |  |
| 1552409_a_at | ODF4           | 0,133056859  | 0,028364014  | 0,104692844 |  |
| 219852_s_at  | MORN1          | 0,133056859  | 0,028364014  | 0,104692844 |  |
| 222830_at    | GRHL1          | 0,133056859  | 0,028364014  | 0,104692844 |  |
| 232915_at    | DDX49          | 0,133056859  | 0,028364014  | 0,104692844 |  |
| 215285_s_at  | PHTF1          | 1,940595304  | 1,835911187  | 0,104684117 |  |
| 227551_at    | FAM108B1       | 3,704430214  | 3,599822964  | 0,10460725  |  |
| 228126_x_at  | CTXN1          | 0,457392764  | 0,352836757  | 0,104556007 |  |
| 218284_at    | SMAD3          | 2,089851283  | 1,98530622   | 0,104545063 |  |
| 212371_at    | DESI2          | 3,930506493  | 3,825986493  | 0,104520001 |  |
| 226712_at    | SSR1           | 2,562727117  | 2,458228496  | 0,104498621 |  |
| 222438_at    | MED4           | 1,780386218  | 1,675891488  | 0,10449473  |  |
| 1554151_at   | OGDH           | -0,055687482 | -0,160136748 | 0,104449266 |  |
| 207743_at    | -              | -0,055687482 | -0,160136748 | 0,104449266 |  |
| 208407_s_at  | CTNND1 /// TMX | -0,055687482 | -0,160136748 | 0,104449266 |  |
| 211663_x_at  | PTGDS          | -0,055687482 | -0,160136748 | 0,104449266 |  |

|              |           |              |              |             |  |
|--------------|-----------|--------------|--------------|-------------|--|
| 216088_s_at  | PSMA7     | 4,486724797  | 4,382314353  | 0,104410444 |  |
| 205817_at    | SIX1      | 0,30867765   | 0,204310755  | 0,104366894 |  |
| 211267_at    | HESX1     | 0,30867765   | 0,204310755  | 0,104366894 |  |
| 209268_at    | VPS45     | 3,288503211  | 3,184136378  | 0,104366833 |  |
| 222702_x_at  | CRIP1     | 3,997499421  | 3,893176339  | 0,104323082 |  |
| 231855_at    | KIAA1524  | 1,894952274  | 1,790660532  | 0,104291742 |  |
| 1554415_at   | TAF5L     | 1,462198073  | 1,3579181    | 0,104279973 |  |
| 203615_x_at  | SULT1A1   | 1,462198073  | 1,3579181    | 0,104279973 |  |
| 213494_s_at  | YY1       | 1,462198073  | 1,3579181    | 0,104279973 |  |
| 1553292_s_at | SGK494    | 0,841135803  | 0,73688026   | 0,104255543 |  |
| 1555639_a_at | RBM14     | 0,841135803  | 0,73688026   | 0,104255543 |  |
| 210544_s_at  | ALDH3A2   | 0,841135803  | 0,73688026   | 0,104255543 |  |
| 218673_s_at  | ATG7      | 0,841135803  | 0,73688026   | 0,104255543 |  |
| 222013_x_at  | FAM86A    | 0,841135803  | 0,73688026   | 0,104255543 |  |
| 224479_s_at  | MRPL45    | 3,649657172  | 3,545468469  | 0,104188704 |  |
| 201978_s_at  | KIAA0141  | 2,048758794  | 1,944570415  | 0,104188379 |  |
| 218745_x_at  | TMEM161A  | 2,976955384  | 2,87289275   | 0,104062634 |  |
| 200839_s_at  | CTSB      | 4,002215714  | 3,898162764  | 0,10405295  |  |
| 1558147_a_at | FLJ90757  | 2,14450783   | 2,040470494  | 0,104037336 |  |
| 223214_s_at  | ZHX1      | 3,554701391  | 3,450709925  | 0,103991467 |  |
| 227239_at    | FAM126A   | 4,365417393  | 4,261479522  | 0,103937871 |  |
| 211318_s_at  | RAE1      | 4,512927979  | 4,409010481  | 0,103917498 |  |
| 218014_at    | NUP85     | 3,914869478  | 3,810956512  | 0,103912966 |  |
| 205543_at    | HSPA4L    | 3,101484927  | 2,997606395  | 0,103878531 |  |
| 202114_at    | SNX2      | 3,469688722  | 3,365837114  | 0,103851608 |  |
| 227696_at    | EXOSC6    | 2,763383302  | 2,659583735  | 0,103799567 |  |
| 244786_at    | SNHG10    | 1,104397092  | 1,000684521  | 0,103712571 |  |
| 1555786_s_at | LINC00520 | 2,194816625  | 2,091116676  | 0,103699949 |  |
| 1561061_at   | LOC729506 | -0,543051993 | -0,646746079 | 0,103694085 |  |
| 204462_s_at  | SLC16A2   | -0,543051993 | -0,646746079 | 0,103694085 |  |
| 206026_s_at  | TNFAIP6   | -0,543051993 | -0,646746079 | 0,103694085 |  |
| 212404_s_at  | UBE3B     | -0,543051993 | -0,646746079 | 0,103694085 |  |
| 213618_at    | ARAP2     | -0,543051993 | -0,646746079 | 0,103694085 |  |
| 220529_at    | FLJ11710  | -0,543051993 | -0,646746079 | 0,103694085 |  |
| 221171_at    | CCDC30    | -0,543051993 | -0,646746079 | 0,103694085 |  |
| 225473_at    | SOGA1     | -0,543051993 | -0,646746079 | 0,103694085 |  |
| 228192_at    | MNF1      | -0,543051993 | -0,646746079 | 0,103694085 |  |
| 231145_at    | PAX9      | -0,543051993 | -0,646746079 | 0,103694085 |  |
| 243513_at    | -         | -0,543051993 | -0,646746079 | 0,103694085 |  |
| 222417_s_at  | SNX5      | 4,831095574  | 4,727463497  | 0,103632077 |  |
| 201169_s_at  | BHLHE40   | 1,473887017  | 1,370274469  | 0,103612548 |  |
| 1556216_s_at | -         | -0,946847173 | -1,050406615 | 0,103559442 |  |
| 1556633_at   | C1orf204  | -0,946847173 | -1,050406615 | 0,103559442 |  |
| 1558856_at   | DMRTA2    | -0,946847173 | -1,050406615 | 0,103559442 |  |
| 204368_at    | SLCO2A1   | -0,946847173 | -1,050406615 | 0,103559442 |  |
| 206230_at    | LHX1      | -0,946847173 | -1,050406615 | 0,103559442 |  |
| 213956_at    | CEP350    | -0,946847173 | -1,050406615 | 0,103559442 |  |
| 220870_at    | -         | -0,946847173 | -1,050406615 | 0,103559442 |  |
| 227588_s_at  | GET4      | -0,946847173 | -1,050406615 | 0,103559442 |  |
| 230436_s_at  | CENPV     | -0,946847173 | -1,050406615 | 0,103559442 |  |
| 232577_at    | LOC145945 | -0,946847173 | -1,050406615 | 0,103559442 |  |
| 234211_at    | -         | -0,946847173 | -1,050406615 | 0,103559442 |  |
| 236137_at    | -         | -0,946847173 | -1,050406615 | 0,103559442 |  |
| 239261_s_at  | CORIN     | -0,946847173 | -1,050406615 | 0,103559442 |  |
| 239660_at    | RALGAPA2  | -0,946847173 | -1,050406615 | 0,103559442 |  |
| 241153_at    | -         | -0,946847173 | -1,050406615 | 0,103559442 |  |

|              |                   |              |              |             |  |
|--------------|-------------------|--------------|--------------|-------------|--|
| 243135_x_at  | SNX8              | -0,946847173 | -1,050406615 | 0,103559442 |  |
| 217814_at    | CCDC47            | 3,811181587  | 3,707626508  | 0,103555079 |  |
| 202382_s_at  | GNPDA1            | 3,492853048  | 3,38929984   | 0,103553207 |  |
| 224755_at    | TM9SF3            | 3,421207626  | 3,317734938  | 0,103472688 |  |
| 1553570_x_at | COX2              | 8,399953048  | 8,296512904  | 0,103440144 |  |
| 1553906_s_at | FGD2              | 3,013454777  | 2,910041809  | 0,103412968 |  |
| 207563_s_at  | OGT               | 2,109966786  | 2,006570641  | 0,103396145 |  |
| 230352_at    | PRPS2             | 3,285189903  | 3,181801492  | 0,103388412 |  |
| 211972_x_at  | RPLP0             | 7,843565687  | 7,740193324  | 0,103372363 |  |
| 239134_at    | -                 | 1,063722698  | 0,960386719  | 0,103335978 |  |
| 226393_at    | CYP2U1            | 1,326951551  | 1,223626587  | 0,103324963 |  |
| 1553101_a_at | ALKBH5 /// LOC1   | 3,327680494  | 3,22439681   | 0,103283684 |  |
| 200847_s_at  | TMEM66            | 5,617673065  | 5,514416888  | 0,103256177 |  |
| 206668_s_at  | SCAMP1            | 0,480753764  | 0,377530647  | 0,103223117 |  |
| 225808_at    | METTL23           | 3,462861802  | 3,359653127  | 0,103208675 |  |
| 206008_at    | TGM1              | -0,033456564 | -0,136643983 | 0,103187418 |  |
| 212321_at    | SGPL1             | -0,033456564 | -0,136643983 | 0,103187418 |  |
| 213268_at    | CAMTA1            | -0,033456564 | -0,136643983 | 0,103187418 |  |
| 221695_s_at  | MAP3K2            | -0,033456564 | -0,136643983 | 0,103187418 |  |
| 225595_at    | CREBZF            | -0,033456564 | -0,136643983 | 0,103187418 |  |
| 208949_s_at  | LGALS3            | 1,481627361  | 1,378453643  | 0,103173718 |  |
| 228011_at    | FAM92A1           | 1,481627361  | 1,378453643  | 0,103173718 |  |
| 231718_at    | SLU7              | 2,861566439  | 2,758473378  | 0,103093061 |  |
| 223556_at    | HELLS             | 2,68509622   | 2,582026171  | 0,103070049 |  |
| 202937_x_at  | RRP7A             | 2,292660284  | 2,189694216  | 0,102966068 |  |
| 211058_x_at  | LOC100288366 /    | 7,744156625  | 7,641219915  | 0,102936711 |  |
| 222792_s_at  | CCDC59            | 4,912447057  | 4,809530416  | 0,102916641 |  |
| 213063_at    | ZC3H14            | 3,375201825  | 3,272369332  | 0,102832493 |  |
| 202974_at    | MPP1              | 5,148945274  | 5,046124219  | 0,102821055 |  |
| 205812_s_at  | TMED9             | 5,697733364  | 5,594934827  | 0,102798537 |  |
| 1553362_at   | DNAH6             | -3,07502285  | -3,177802286 | 0,102779436 |  |
| 1560980_a_at | -                 | -3,07502285  | -3,177802286 | 0,102779436 |  |
| 1561644_x_at | -                 | -3,07502285  | -3,177802286 | 0,102779436 |  |
| 1561789_at   | -                 | -3,07502285  | -3,177802286 | 0,102779436 |  |
| 1569772_x_at | -                 | -3,07502285  | -3,177802286 | 0,102779436 |  |
| 206426_at    | MLANA             | -3,07502285  | -3,177802286 | 0,102779436 |  |
| 206664_at    | SI                | -3,07502285  | -3,177802286 | 0,102779436 |  |
| 217194_at    | -                 | -3,07502285  | -3,177802286 | 0,102779436 |  |
| 224101_x_at  | MRS2              | -3,07502285  | -3,177802286 | 0,102779436 |  |
| 235801_at    | TUSC3             | -3,07502285  | -3,177802286 | 0,102779436 |  |
| 236277_at    | -                 | -3,07502285  | -3,177802286 | 0,102779436 |  |
| 237608_at    | -                 | -3,07502285  | -3,177802286 | 0,102779436 |  |
| 239317_at    | CEACAM21          | -3,07502285  | -3,177802286 | 0,102779436 |  |
| 203348_s_at  | ETV5              | 1,751865623  | 1,64909809   | 0,102767532 |  |
| 226516_at    | MFSD12            | 1,81142822   | 1,708698295  | 0,102729925 |  |
| 200810_s_at  | CIRBP             | 4,685380613  | 4,582769126  | 0,102611487 |  |
| 227668_at    | C17orf56          | 1,339784194  | 1,23718272   | 0,102601475 |  |
| 218295_s_at  | NUP50             | 2,2992452    | 2,196649505  | 0,102595696 |  |
| 221887_s_at  | DFNB31            | 0,87091093   | 0,768343791  | 0,102567139 |  |
| 230884_s_at  | SPG7              | 0,87091093   | 0,768343791  | 0,102567139 |  |
| 204663_at    | ME3               | 1,493160564  | 1,390636111  | 0,102524453 |  |
| 211849_s_at  | RNGTT             | 1,493160564  | 1,390636111  | 0,102524453 |  |
| 212509_s_at  | MXRA7             | 3,438212789  | 3,335699198  | 0,102513591 |  |
| 223494_at    | MGEA5             | 3,512821151  | 3,410394103  | 0,102427048 |  |
| 222604_at    | GTF3C3            | 2,173470163  | 2,071071048  | 0,102399115 |  |
| 210784_x_at  | LILRA6 /// LILRB3 | 0,496120222  | 0,393761504  | 0,102358718 |  |

|              |                 |              |              |             |  |
|--------------|-----------------|--------------|--------------|-------------|--|
| 237287_at    | HMGA1P4         | 0,496120222  | 0,393761504  | 0,102358718 |  |
| 242466_at    | -               | 0,496120222  | 0,393761504  | 0,102358718 |  |
| 200777_s_at  | BZW1            | 5,795096834  | 5,692776415  | 0,10232042  |  |
| 223195_s_at  | SESN2           | 2,082235068  | 1,979940779  | 0,102294289 |  |
| 214398_s_at  | IKBKE           | 0,760715727  | 0,658444279  | 0,102271448 |  |
| 226292_at    | CAPN5           | 0,760715727  | 0,658444279  | 0,102271448 |  |
| 224748_at    | DCAF7           | 4,305079945  | 4,202810939  | 0,102269006 |  |
| 201546_at    | TRIP12          | 4,937989849  | 4,835756686  | 0,102233162 |  |
| 212931_at    | TCF20           | 1,820612054  | 1,718396606  | 0,102215448 |  |
| 227649_s_at  | SRGAP2          | 1,820612054  | 1,718396606  | 0,102215448 |  |
| 205324_s_at  | FTSJ1           | 4,326728025  | 4,224525141  | 0,102202884 |  |
| 1555789_s_at | PHF23           | 3,132544588  | 3,030417996  | 0,102126592 |  |
| 203318_s_at  | ZNF148          | 1,348276312  | 1,246149888  | 0,102126423 |  |
| 211924_s_at  | PLAUR           | 1,348276312  | 1,246149888  | 0,102126423 |  |
| 1568869_at   | -               | -0,512251684 | -0,614371577 | 0,102119892 |  |
| 206324_s_at  | DAPK2           | -0,512251684 | -0,614371577 | 0,102119892 |  |
| 210711_at    | LINC00260       | -0,512251684 | -0,614371577 | 0,102119892 |  |
| 216082_at    | NEU3            | -0,512251684 | -0,614371577 | 0,102119892 |  |
| 219249_s_at  | FKBP10          | -0,512251684 | -0,614371577 | 0,102119892 |  |
| 221183_at    | LOC100507388    | -0,512251684 | -0,614371577 | 0,102119892 |  |
| 223504_at    | DNAJC27         | -0,512251684 | -0,614371577 | 0,102119892 |  |
| 232724_at    | MS4A6A          | -0,512251684 | -0,614371577 | 0,102119892 |  |
| 234452_at    | HIBADH          | -0,512251684 | -0,614371577 | 0,102119892 |  |
| 239086_at    | -               | -0,512251684 | -0,614371577 | 0,102119892 |  |
| 239842_x_at  | -               | -0,512251684 | -0,614371577 | 0,102119892 |  |
| 241173_at    | -               | -0,512251684 | -0,614371577 | 0,102119892 |  |
| 242156_at    | -               | -0,512251684 | -0,614371577 | 0,102119892 |  |
| 227229_at    | VPS53           | 1,426552034  | 1,324440845  | 0,102111189 |  |
| 212552_at    | HPCAL1          | 4,43733059   | 4,335292864  | 0,102037726 |  |
| 1555989_at   | -               | 2,038300149  | 1,936283387  | 0,102016762 |  |
| 217301_x_at  | RBBP4           | 5,111084956  | 5,009069778  | 0,102015177 |  |
| 1557605_a_at | LOC401312       | 0,181384709  | 0,079428135  | 0,101956574 |  |
| 228960_at    | NARG2           | 0,181384709  | 0,079428135  | 0,101956574 |  |
| 202849_x_at  | GRK6            | 2,705069849  | 2,603119255  | 0,101950595 |  |
| 219877_at    | ZMAT4           | 0,351548291  | 0,249604176  | 0,101944115 |  |
| 236119_s_at  | SPRR2G          | 0,351548291  | 0,249604176  | 0,101944115 |  |
| 1552664_at   | FLCN            | 1,089278259  | 0,987376598  | 0,101901662 |  |
| 1553858_at   | ZBTB3           | 1,089278259  | 0,987376598  | 0,101901662 |  |
| 224180_x_at  | WDPCP           | 1,089278259  | 0,987376598  | 0,101901662 |  |
| 227006_at    | PPP1R14A        | 3,183265014  | 3,081412119  | 0,101852895 |  |
| 211284_s_at  | GRN             | 2,912562019  | 2,810785576  | 0,101776443 |  |
| 200973_s_at  | TSPAN3          | 3,829494273  | 3,727773127  | 0,101721146 |  |
| 227187_at    | CBLL1           | 2,710020346  | 2,608344689  | 0,101675657 |  |
| 212003_at    | C1orf144        | 2,678376417  | 2,576704359  | 0,101672058 |  |
| 202550_s_at  | VAPB            | 3,678566904  | 3,576905405  | 0,101661499 |  |
| 228542_at    | MRS2            | 2,544366685  | 2,442710777  | 0,101655908 |  |
| 224647_at    | CCNY            | 4,406149819  | 4,304503145  | 0,101646674 |  |
| 207524_at    | ST7 /// ST7-OT3 | 0,888485433  | 0,786897721  | 0,101587712 |  |
| 243188_at    | ZNF283          | 0,888485433  | 0,786897721  | 0,101587712 |  |
| 203015_s_at  | SSX2IP          | 1,995690482  | 1,894118818  | 0,101571664 |  |
| 201111_at    | CSE1L           | 5,089402992  | 4,987842433  | 0,101560558 |  |
| 202636_at    | RNF103          | 2,580856819  | 2,479296438  | 0,101560381 |  |
| 227864_s_at  | FAM125A         | 2,774453351  | 2,672945617  | 0,101507734 |  |
| 215208_x_at  | RPL35A          | 1,512180019  | 1,410714371  | 0,101465647 |  |
| 226040_at    | -               | 1,191926657  | 1,090553537  | 0,10137312  |  |
| 1552995_at   | IL27            | -0,00073712  | -0,102100538 | 0,101363417 |  |

|              |                 |              |              |             |  |
|--------------|-----------------|--------------|--------------|-------------|--|
| 208100_x_at  | SEMA6C          | -0,00073712  | -0,102100538 | 0,101363417 |  |
| 211405_x_at  | IFNA17          | -0,00073712  | -0,102100538 | 0,101363417 |  |
| 211506_s_at  | IL8             | -0,00073712  | -0,102100538 | 0,101363417 |  |
| 229411_at    | PNCK            | -0,00073712  | -0,102100538 | 0,101363417 |  |
| 233888_s_at  | SRGAP1          | -0,00073712  | -0,102100538 | 0,101363417 |  |
| 239783_at    | -               | -0,00073712  | -0,102100538 | 0,101363417 |  |
| 225227_at    | SKIL            | 3,279650757  | 3,178292062  | 0,101358695 |  |
| 226597_at    | REEP6           | 2,146943689  | 2,045615873  | 0,101327817 |  |
| 202104_s_at  | SPG7            | 2,478200152  | 2,376875125  | 0,101325027 |  |
| 203714_s_at  | TBCE            | 3,949468585  | 3,848241888  | 0,101226696 |  |
| 205474_at    | CRLF3           | 3,101484927  | 3,000258961  | 0,101225966 |  |
| 201447_at    | TIA1            | 2,922548342  | 2,821324225  | 0,101224117 |  |
| 1559582_at   | RHOQ            | -0,221656139 | -0,322870281 | 0,101214143 |  |
| 213539_at    | CD3D            | -0,221656139 | -0,322870281 | 0,101214143 |  |
| 219318_x_at  | MED31           | -0,221656139 | -0,322870281 | 0,101214143 |  |
| 227365_at    | ATCAY           | -0,221656139 | -0,322870281 | 0,101214143 |  |
| 233673_at    | -               | -0,221656139 | -0,322870281 | 0,101214143 |  |
| 234528_at    | -               | -0,221656139 | -0,322870281 | 0,101214143 |  |
| 235865_at    | CELF1           | -0,221656139 | -0,322870281 | 0,101214143 |  |
| 242376_at    | -               | -0,221656139 | -0,322870281 | 0,101214143 |  |
| 211676_s_at  | IFNGR1          | 3,054253462  | 2,953119918  | 0,101133544 |  |
| 223513_at    | CENPJ           | 2,840652551  | 2,739547836  | 0,101104715 |  |
| 226464_at    | C3orf58         | 4,527957295  | 4,426866007  | 0,101091288 |  |
| 223040_at    | NAA20           | 5,091933607  | 4,990846468  | 0,101087139 |  |
| 208645_s_at  | RPS14           | 8,023970784  | 7,9229005    | 0,101070284 |  |
| 206790_s_at  | NDUFB1          | 6,010044129  | 5,908998287  | 0,101045842 |  |
| 234762_x_at  | NLN             | 2,926807124  | 2,825817328  | 0,100989795 |  |
| 213775_x_at  | ZNF638          | 4,710299868  | 4,609508596  | 0,100791272 |  |
| 218527_at    | APTX            | 2,726400382  | 2,625627364  | 0,100773018 |  |
| 223032_x_at  | PRELID1         | 5,637729671  | 5,536971059  | 0,100758613 |  |
| 208811_s_at  | DNAJB6 /// TMEM | 4,654470045  | 4,553720057  | 0,100749988 |  |
| 212522_at    | PDE8A           | 1,373456798  | 1,272721751  | 0,100735047 |  |
| 225129_at    | CPNE2           | 1,373456798  | 1,272721751  | 0,100735047 |  |
| 1555864_s_at | PDHA1           | 5,265058615  | 5,164369044  | 0,100689571 |  |
| 229587_at    | UBA2            | 2,790121796  | 2,689475799  | 0,100645997 |  |
| 242195_x_at  | NUMBL           | 2,933877275  | 2,833274877  | 0,100602398 |  |
| 219069_at    | ANKRD49         | 3,228817493  | 3,128242026  | 0,100575467 |  |
| 1552329_at   | RBBP6           | 1,114389003  | 1,013870809  | 0,100518194 |  |
| 201103_x_at  | LOC100506032 /  | 5,422384122  | 5,321896852  | 0,10048727  |  |
| 210174_at    | NR5A2           | 2,700102307  | 2,599625088  | 0,100477219 |  |
| 222239_s_at  | INTS6           | 1,732533761  | 1,632095957  | 0,100437804 |  |
| 218684_at    | LRRC8D          | 5,38907564   | 5,288648454  | 0,100427185 |  |
| 210423_s_at  | SLC11A1         | 0,209623097  | 0,109221392  | 0,100401705 |  |
| 224088_at    | NMUR2           | 0,209623097  | 0,109221392  | 0,100401705 |  |
| 227504_s_at  | -               | 0,209623097  | 0,109221392  | 0,100401705 |  |
| 200043_at    | ERH             | 6,924093067  | 6,823703003  | 0,100390064 |  |
| 233827_s_at  | SUPT16H         | 3,276317033  | 3,175947691  | 0,100369342 |  |
| 214965_at    | SPATA2L         | 1,912238072  | 1,811954245  | 0,100283827 |  |
| 235574_at    | GBP4            | 1,912238072  | 1,811954245  | 0,100283827 |  |
| 227541_at    | WDR20           | 2,11992033   | 2,019703483  | 0,100216847 |  |
| 1555447_at   | GPR114          | 0,020670649  | -0,079522948 | 0,100193598 |  |
| 1569501_at   | -               | 0,020670649  | -0,079522948 | 0,100193598 |  |
| 240229_at    | -               | 0,020670649  | -0,079522948 | 0,100193598 |  |
| 243715_at    | -               | 0,020670649  | -0,079522948 | 0,100193598 |  |
| 218795_at    | ACP6            | 3,046446467  | 2,946258252  | 0,100188215 |  |
| 228676_at    | ORAOV1          | 1,021868205  | 0,921731975  | 0,10013623  |  |

|              |                 |              |              |             |  |
|--------------|-----------------|--------------|--------------|-------------|--|
| 227304_at    | SMCR8           | 1,607231019  | 1,507116528  | 0,100114492 |  |
| 229074_at    | EHD4            | 1,607231019  | 1,507116528  | 0,100114492 |  |
| 229618_at    | SNX16           | 1,607231019  | 1,507116528  | 0,100114492 |  |
| 212082_s_at  | MYL6            | 6,889418081  | 6,78932054   | 0,100097542 |  |
| 218569_s_at  | KBTBD4          | 1,215326747  | 1,115234684  | 0,100092063 |  |
| 1553138_a_at | ANKLE1          | 1,859746653  | 1,759685182  | 0,100061471 |  |
| 228007_at    | CEP85L          | 2,573632254  | 2,473581079  | 0,100051175 |  |
| 230223_at    | ZNF839          | 0,917308734  | 0,817300337  | 0,100008397 |  |
| 218856_at    | TNFRSF21        | 2,802535172  | 2,702564916  | 0,099970256 |  |
| 229732_at    | ZNF823          | 3,693640704  | 3,593688577  | 0,099952127 |  |
| 210759_s_at  | PSMA1           | 5,178117298  | 5,078176444  | 0,099940854 |  |
| 222754_at    | TRNT1           | 3,467741468  | 3,367892567  | 0,099848901 |  |
| 1554828_at   | PDGFRA          | -1,937711681 | -2,037551727 | 0,099840045 |  |
| 1555144_at   | ARL17A /// ARL1 | -1,937711681 | -2,037551727 | 0,099840045 |  |
| 1555798_at   | LOC400692       | -1,937711681 | -2,037551727 | 0,099840045 |  |
| 1557504_at   | -               | -1,937711681 | -2,037551727 | 0,099840045 |  |
| 1561469_at   | -               | -1,937711681 | -2,037551727 | 0,099840045 |  |
| 1561757_a_at | LOC283352       | -1,937711681 | -2,037551727 | 0,099840045 |  |
| 1562280_at   | -               | -1,937711681 | -2,037551727 | 0,099840045 |  |
| 1566141_at   | -               | -1,937711681 | -2,037551727 | 0,099840045 |  |
| 1570087_at   | -               | -1,937711681 | -2,037551727 | 0,099840045 |  |
| 207575_at    | GOLGA6A         | -1,937711681 | -2,037551727 | 0,099840045 |  |
| 213802_at    | PRSS12          | -1,937711681 | -2,037551727 | 0,099840045 |  |
| 215378_at    | -               | -1,937711681 | -2,037551727 | 0,099840045 |  |
| 217504_at    | ABCA6           | -1,937711681 | -2,037551727 | 0,099840045 |  |
| 219671_at    | HPCAL4          | -1,937711681 | -2,037551727 | 0,099840045 |  |
| 220527_at    | MRPL20          | -1,937711681 | -2,037551727 | 0,099840045 |  |
| 223999_at    | PPIL2           | -1,937711681 | -2,037551727 | 0,099840045 |  |
| 224488_s_at  | SPON1           | -1,937711681 | -2,037551727 | 0,099840045 |  |
| 231588_at    | PRCP            | -1,937711681 | -2,037551727 | 0,099840045 |  |
| 233225_at    | -               | -1,937711681 | -2,037551727 | 0,099840045 |  |
| 234013_at    | YME1L1          | -1,937711681 | -2,037551727 | 0,099840045 |  |
| 235230_at    | PLCXD2          | -1,937711681 | -2,037551727 | 0,099840045 |  |
| 236002_at    | -               | -1,937711681 | -2,037551727 | 0,099840045 |  |
| 236939_at    | PTPLAD2         | -1,937711681 | -2,037551727 | 0,099840045 |  |
| 239338_x_at  | -               | -1,937711681 | -2,037551727 | 0,099840045 |  |
| 239567_at    | -               | -1,937711681 | -2,037551727 | 0,099840045 |  |
| 1555542_at   | AFAP1L1         | -0,85085127  | -0,950686014 | 0,099834745 |  |
| 1560489_at   | -               | -0,85085127  | -0,950686014 | 0,099834745 |  |
| 205674_x_at  | FXVD2           | -0,85085127  | -0,950686014 | 0,099834745 |  |
| 219431_at    | ARHGAP10        | -0,85085127  | -0,950686014 | 0,099834745 |  |
| 221103_s_at  | WDR52           | -0,85085127  | -0,950686014 | 0,099834745 |  |
| 223586_at    | ARNTL2          | -0,85085127  | -0,950686014 | 0,099834745 |  |
| 228584_at    | SGCB            | -0,85085127  | -0,950686014 | 0,099834745 |  |
| 237255_at    | LOC100506115    | -0,85085127  | -0,950686014 | 0,099834745 |  |
| 239845_at    | -               | -0,85085127  | -0,950686014 | 0,099834745 |  |
| 242848_x_at  | -               | -0,85085127  | -0,950686014 | 0,099834745 |  |
| 224869_s_at  | MRPS25          | 3,920575295  | 3,820743792  | 0,099831503 |  |
| 1555906_s_at | C3orf23         | 1,542099044  | 1,442269454  | 0,09982959  |  |
| 236198_at    | -               | 1,542099044  | 1,442269454  | 0,09982959  |  |
| 207412_x_at  | CELP            | -0,467091869 | -0,566887459 | 0,099795591 |  |
| 216983_s_at  | ZNF224          | -0,467091869 | -0,566887459 | 0,099795591 |  |
| 217227_x_at  | IGLV1-44        | -0,467091869 | -0,566887459 | 0,099795591 |  |
| 221546_at    | PRPF18          | -0,467091869 | -0,566887459 | 0,099795591 |  |
| 221731_x_at  | VCAN            | -0,467091869 | -0,566887459 | 0,099795591 |  |
| 224145_s_at  | SPTBN4          | -0,467091869 | -0,566887459 | 0,099795591 |  |

|              |                |              |              |             |  |
|--------------|----------------|--------------|--------------|-------------|--|
| 230462_at    | NUMB           | -0,467091869 | -0,566887459 | 0,099795591 |  |
| 231451_s_at  | -              | -0,467091869 | -0,566887459 | 0,099795591 |  |
| 238106_at    | -              | -0,467091869 | -0,566887459 | 0,099795591 |  |
| 218855_at    | TPRA1          | 1,865674241  | 1,765933685  | 0,099740556 |  |
| 201373_at    | PLEC           | 1,129248302  | 1,029536893  | 0,099711409 |  |
| 218201_at    | NDUFB2         | 5,830001953  | 5,730307495  | 0,099694458 |  |
| 214170_x_at  | FH             | 4,402586695  | 4,302892559  | 0,099694136 |  |
| 224641_at    | FYTDD1         | 4,055697197  | 3,956010056  | 0,09968714  |  |
| 1552523_a_at | TIGD4          | -1,812418401 | -1,912089812 | 0,099671411 |  |
| 1555602_a_at | ELAVL3         | -1,812418401 | -1,912089812 | 0,099671411 |  |
| 1562693_at   | -              | -1,812418401 | -1,912089812 | 0,099671411 |  |
| 1563023_at   | -              | -1,812418401 | -1,912089812 | 0,099671411 |  |
| 1570339_x_at | -              | -1,812418401 | -1,912089812 | 0,099671411 |  |
| 204581_at    | CD22           | -1,812418401 | -1,912089812 | 0,099671411 |  |
| 204851_s_at  | DCX            | -1,812418401 | -1,912089812 | 0,099671411 |  |
| 205509_at    | CPB1           | -1,812418401 | -1,912089812 | 0,099671411 |  |
| 206276_at    | LY6D           | -1,812418401 | -1,912089812 | 0,099671411 |  |
| 207751_at    | -              | -1,812418401 | -1,912089812 | 0,099671411 |  |
| 211138_s_at  | KMO            | -1,812418401 | -1,912089812 | 0,099671411 |  |
| 213744_at    | ATRNL1         | -1,812418401 | -1,912089812 | 0,099671411 |  |
| 215612_at    | -              | -1,812418401 | -1,912089812 | 0,099671411 |  |
| 215934_at    | -              | -1,812418401 | -1,912089812 | 0,099671411 |  |
| 221030_s_at  | ARHGAP24       | -1,812418401 | -1,912089812 | 0,099671411 |  |
| 221053_s_at  | TDRKH          | -1,812418401 | -1,912089812 | 0,099671411 |  |
| 235928_at    | -              | -1,812418401 | -1,912089812 | 0,099671411 |  |
| 210163_at    | CXCL11         | 2,352981171  | 2,253342112  | 0,099639059 |  |
| 201175_at    | TMX2           | 4,764049426  | 4,66447467   | 0,099574756 |  |
| 233320_at    | TCAM1P         | 1,748661581  | 1,64909809   | 0,099563491 |  |
| 224758_at    | C7orf73        | 2,582657321  | 2,483094137  | 0,099563184 |  |
| 1556789_a_at | GCFC1-AS1      | -2,063149277 | -2,162639771 | 0,099490494 |  |
| 1561761_x_at | LOC100507322 / | -2,063149277 | -2,162639771 | 0,099490494 |  |
| 1563882_a_at | RAPGEF5        | -2,063149277 | -2,162639771 | 0,099490494 |  |
| 1566715_at   | -              | -2,063149277 | -2,162639771 | 0,099490494 |  |
| 1569620_s_at | LOC100128079   | -2,063149277 | -2,162639771 | 0,099490494 |  |
| 207694_at    | POU3F4         | -2,063149277 | -2,162639771 | 0,099490494 |  |
| 209800_at    | KRT16          | -2,063149277 | -2,162639771 | 0,099490494 |  |
| 214304_x_at  | -              | -2,063149277 | -2,162639771 | 0,099490494 |  |
| 216494_at    | -              | -2,063149277 | -2,162639771 | 0,099490494 |  |
| 216517_at    | IGKC           | -2,063149277 | -2,162639771 | 0,099490494 |  |
| 216884_at    | PTPN12         | -2,063149277 | -2,162639771 | 0,099490494 |  |
| 219584_at    | PLA1A          | -2,063149277 | -2,162639771 | 0,099490494 |  |
| 221840_at    | PTPRE          | -2,063149277 | -2,162639771 | 0,099490494 |  |
| 224170_s_at  | TULP4          | -2,063149277 | -2,162639771 | 0,099490494 |  |
| 227359_at    | OSCP1          | -2,063149277 | -2,162639771 | 0,099490494 |  |
| 229667_s_at  | HOXB8          | -2,063149277 | -2,162639771 | 0,099490494 |  |
| 231179_at    | IP6K3          | -2,063149277 | -2,162639771 | 0,099490494 |  |
| 231235_at    | NKTR           | -2,063149277 | -2,162639771 | 0,099490494 |  |
| 231373_at    | RNF133         | -2,063149277 | -2,162639771 | 0,099490494 |  |
| 233316_at    | -              | -2,063149277 | -2,162639771 | 0,099490494 |  |
| 233383_at    | -              | -2,063149277 | -2,162639771 | 0,099490494 |  |
| 236047_at    | XKR6           | -2,063149277 | -2,162639771 | 0,099490494 |  |
| 236113_at    | -              | -2,063149277 | -2,162639771 | 0,099490494 |  |
| 236534_at    | BNIP1          | -2,063149277 | -2,162639771 | 0,099490494 |  |
| 238989_at    | C1GALT1C1      | -2,063149277 | -2,162639771 | 0,099490494 |  |
| 240997_at    | -              | -2,063149277 | -2,162639771 | 0,099490494 |  |
| 214354_x_at  | SFTPB          | 1,314003737  | 1,214517879  | 0,099485858 |  |

|              |                |              |              |             |  |
|--------------|----------------|--------------|--------------|-------------|--|
| 228583_at    | LIN52          | 2,512607472  | 2,413157372  | 0,0994501   |  |
| 219828_at    | RABL6          | 3,158127685  | 3,058687544  | 0,099440141 |  |
| 217741_s_at  | ZFAND5         | 3,602516743  | 3,503081281  | 0,099435462 |  |
| 200057_s_at  | NONO           | 7,10590457   | 7,006489352  | 0,099415218 |  |
| 211172_x_at  | AKAP7          | 0,228146222  | 0,128747141  | 0,099399081 |  |
| 214617_at    | PRF1           | 0,228146222  | 0,128747141  | 0,099399081 |  |
| 217576_x_at  | SOS2           | 0,228146222  | 0,128747141  | 0,099399081 |  |
| 1553586_at   | FBXL19-AS1     | -1,763254337 | -1,862647763 | 0,099393426 |  |
| 1558118_at   | LOC100287576 / | -1,763254337 | -1,862647763 | 0,099393426 |  |
| 1558868_a_at | DSE            | -1,763254337 | -1,862647763 | 0,099393426 |  |
| 1565150_at   | -              | -1,763254337 | -1,862647763 | 0,099393426 |  |
| 1568782_at   | RP2            | -1,763254337 | -1,862647763 | 0,099393426 |  |
| 206700_s_at  | KDM5D          | -1,763254337 | -1,862647763 | 0,099393426 |  |
| 213695_at    | PON3           | -1,763254337 | -1,862647763 | 0,099393426 |  |
| 214577_at    | MAP1B          | -1,763254337 | -1,862647763 | 0,099393426 |  |
| 215289_at    | ZNF749         | -1,763254337 | -1,862647763 | 0,099393426 |  |
| 220686_s_at  | PIWIL2         | -1,763254337 | -1,862647763 | 0,099393426 |  |
| 227848_at    | PEBP4          | -1,763254337 | -1,862647763 | 0,099393426 |  |
| 232842_at    | DOCK8          | -1,763254337 | -1,862647763 | 0,099393426 |  |
| 234422_at    | -              | -1,763254337 | -1,862647763 | 0,099393426 |  |
| 234840_s_at  | OR5V1          | -1,763254337 | -1,862647763 | 0,099393426 |  |
| 236586_at    | -              | -1,763254337 | -1,862647763 | 0,099393426 |  |
| 236657_at    | LOC100288911   | -1,763254337 | -1,862647763 | 0,099393426 |  |
| 239271_at    | SMAD2          | -1,763254337 | -1,862647763 | 0,099393426 |  |
| 240808_at    | ESD            | -1,763254337 | -1,862647763 | 0,099393426 |  |
| 241966_at    | MYO5A          | -1,763254337 | -1,862647763 | 0,099393426 |  |
| 242658_at    | -              | -1,763254337 | -1,862647763 | 0,099393426 |  |
| 243231_at    | SLC38A11       | -1,763254337 | -1,862647763 | 0,099393426 |  |
| 231763_at    | POLR3A         | 2,783874823  | 2,684536601  | 0,099338222 |  |
| 1555910_at   | PTCD2          | 1,689737652  | 1,590454215  | 0,099283436 |  |
| 201258_at    | RPS16          | 7,931053997  | 7,831787108  | 0,099266889 |  |
| 218465_at    | TMEM33         | 3,38038663   | 3,281121096  | 0,099265535 |  |
| 215091_s_at  | GTF3A          | 6,06790868   | 5,968708536  | 0,099200144 |  |
| 213091_at    | CRTC1          | 1,40228911   | 1,303116084  | 0,099173025 |  |
| 209278_s_at  | TFPI2          | 6,490407486  | 6,391269595  | 0,099137892 |  |
| 1557325_at   | -              | 0,555999837  | 0,456918297  | 0,09908154  |  |
| 211970_x_at  | ACTG1          | 7,821863345  | 7,722782559  | 0,099080786 |  |
| 212672_at    | ATM            | 1,758252436  | 1,659204017  | 0,09904842  |  |
| 229826_at    | C3orf78        | 2,758612869  | 2,659583735  | 0,099029133 |  |
| 201068_s_at  | PSMC2          | 6,098748309  | 5,999775868  | 0,098972441 |  |
| 1554127_s_at | MSRB3          | -1,688127507 | -1,787089803 | 0,098962296 |  |
| 1554708_s_at | SPATA6L        | -1,688127507 | -1,787089803 | 0,098962296 |  |
| 1556740_at   | EGFLAM-AS2     | -1,688127507 | -1,787089803 | 0,098962296 |  |
| 1557193_at   | -              | -1,688127507 | -1,787089803 | 0,098962296 |  |
| 1558859_at   | LOC401320      | -1,688127507 | -1,787089803 | 0,098962296 |  |
| 1564227_at   | -              | -1,688127507 | -1,787089803 | 0,098962296 |  |
| 1569376_s_at | -              | -1,688127507 | -1,787089803 | 0,098962296 |  |
| 201372_s_at  | CUL3           | -1,688127507 | -1,787089803 | 0,098962296 |  |
| 206708_at    | FOXN2          | -1,688127507 | -1,787089803 | 0,098962296 |  |
| 210965_x_at  | CDK13          | -1,688127507 | -1,787089803 | 0,098962296 |  |
| 216847_at    | -              | -1,688127507 | -1,787089803 | 0,098962296 |  |
| 220997_s_at  | DIAPH3         | -1,688127507 | -1,787089803 | 0,098962296 |  |
| 225626_at    | PAG1           | -1,688127507 | -1,787089803 | 0,098962296 |  |
| 228057_at    | DDIT4L         | -1,688127507 | -1,787089803 | 0,098962296 |  |
| 229523_at    | -              | -1,688127507 | -1,787089803 | 0,098962296 |  |
| 230547_at    | KCNC1          | -1,688127507 | -1,787089803 | 0,098962296 |  |



|              |                |              |              |             |  |
|--------------|----------------|--------------|--------------|-------------|--|
| 232107_at    | -              | -1,688127507 | -1,787089803 | 0,098962296 |  |
| 232588_at    | STAG1          | -1,688127507 | -1,787089803 | 0,098962296 |  |
| 234962_at    | -              | -1,688127507 | -1,787089803 | 0,098962296 |  |
| 236187_s_at  | -              | -1,688127507 | -1,787089803 | 0,098962296 |  |
| 239173_at    | INADL          | -1,688127507 | -1,787089803 | 0,098962296 |  |
| 239746_at    | MESDC2         | -1,688127507 | -1,787089803 | 0,098962296 |  |
| 240486_at    | HELZ           | -1,688127507 | -1,787089803 | 0,098962296 |  |
| 242993_at    | -              | -1,688127507 | -1,787089803 | 0,098962296 |  |
| 243995_at    | PTAR1          | -1,688127507 | -1,787089803 | 0,098962296 |  |
| 218268_at    | TBC1D15        | 3,236843482  | 3,137910193  | 0,098933289 |  |
| 212094_at    | PEG10          | 2,14450783   | 2,045615873  | 0,098891957 |  |
| 210449_x_at  | MAPK14         | 1,560488174  | 1,461646549  | 0,098841625 |  |
| 218296_x_at  | MSTO1 /// MSTC | 1,560488174  | 1,461646549  | 0,098841625 |  |
| 1552870_s_at | AXDND1         | -3,212234735 | -3,311072652 | 0,098837917 |  |
| 1559353_at   | -              | -3,212234735 | -3,311072652 | 0,098837917 |  |
| 1559545_at   | LOC100506948 / | -3,212234735 | -3,311072652 | 0,098837917 |  |
| 1562301_at   | C8orf34        | -3,212234735 | -3,311072652 | 0,098837917 |  |
| 1570244_at   | -              | -3,212234735 | -3,311072652 | 0,098837917 |  |
| 236995_x_at  | TFEC           | -3,212234735 | -3,311072652 | 0,098837917 |  |
| 203137_at    | WTAP           | 5,606212153  | 5,507441463  | 0,09877069  |  |
| 209512_at    | HSDL2          | 1,04816921   | 0,949447784  | 0,098721427 |  |
| 209380_s_at  | ABCC5          | 3,469688722  | 3,370970266  | 0,098718457 |  |
| 212195_at    | IL6ST          | 5,612394725  | 5,513720861  | 0,098673863 |  |
| 1552673_at   | RFX6           | -2,187914861 | -2,286583451 | 0,098668589 |  |
| 1554779_s_at | PHLDB2         | -2,187914861 | -2,286583451 | 0,098668589 |  |
| 1557222_at   | -              | -2,187914861 | -2,286583451 | 0,098668589 |  |
| 1559597_at   | -              | -2,187914861 | -2,286583451 | 0,098668589 |  |
| 1562384_at   | -              | -2,187914861 | -2,286583451 | 0,098668589 |  |
| 1562457_at   | NCKAP5L        | -2,187914861 | -2,286583451 | 0,098668589 |  |
| 1568887_at   | -              | -2,187914861 | -2,286583451 | 0,098668589 |  |
| 1569573_at   | -              | -2,187914861 | -2,286583451 | 0,098668589 |  |
| 204959_at    | MNDA           | -2,187914861 | -2,286583451 | 0,098668589 |  |
| 206385_s_at  | ANK3           | -2,187914861 | -2,286583451 | 0,098668589 |  |
| 206651_s_at  | CPB2           | -2,187914861 | -2,286583451 | 0,098668589 |  |
| 207197_at    | ZIC3           | -2,187914861 | -2,286583451 | 0,098668589 |  |
| 209687_at    | CXCL12         | -2,187914861 | -2,286583451 | 0,098668589 |  |
| 209830_s_at  | SLC9A3R2       | -2,187914861 | -2,286583451 | 0,098668589 |  |
| 212344_at    | SULF1          | -2,187914861 | -2,286583451 | 0,098668589 |  |
| 216850_at    | LOC100506948 / | -2,187914861 | -2,286583451 | 0,098668589 |  |
| 224495_at    | TMEM107        | -2,187914861 | -2,286583451 | 0,098668589 |  |
| 226769_at    | FIBIN          | -2,187914861 | -2,286583451 | 0,098668589 |  |
| 228086_at    | STK33          | -2,187914861 | -2,286583451 | 0,098668589 |  |
| 229979_x_at  | -              | -2,187914861 | -2,286583451 | 0,098668589 |  |
| 230366_at    | LOC100505683   | -2,187914861 | -2,286583451 | 0,098668589 |  |
| 231350_at    | -              | -2,187914861 | -2,286583451 | 0,098668589 |  |
| 231358_at    | MRO            | -2,187914861 | -2,286583451 | 0,098668589 |  |
| 232651_at    | LOC100287813   | -2,187914861 | -2,286583451 | 0,098668589 |  |
| 234385_at    | -              | -2,187914861 | -2,286583451 | 0,098668589 |  |
| 239900_x_at  | -              | -2,187914861 | -2,286583451 | 0,098668589 |  |
| 242117_at    | -              | -2,187914861 | -2,286583451 | 0,098668589 |  |
| 242331_x_at  | LOC642236      | -2,187914861 | -2,286583451 | 0,098668589 |  |
| 242432_at    | LRRC37A2       | -2,187914861 | -2,286583451 | 0,098668589 |  |
| 242899_at    | SESN3          | -2,187914861 | -2,286583451 | 0,098668589 |  |
| 243155_at    | -              | -2,187914861 | -2,286583451 | 0,098668589 |  |
| 243854_at    | -              | -2,187914861 | -2,286583451 | 0,098668589 |  |
| 229083_at    | -              | 2,52764011   | 2,428994491  | 0,09864562  |  |

|              |                |              |              |             |  |
|--------------|----------------|--------------|--------------|-------------|--|
| 1552873_s_at | ASMTL-AS1      | 0,702292136  | 0,603679647  | 0,098612489 |  |
| 218812_s_at  | ORAI2          | 0,702292136  | 0,603679647  | 0,098612489 |  |
| 202401_s_at  | SRF            | 2,600539826  | 2,501934108  | 0,098605717 |  |
| 202413_s_at  | USP1           | 4,96550526   | 4,866974944  | 0,098530315 |  |
| 223382_s_at  | ZNRF1          | 2,566371329  | 2,467842989  | 0,09852834  |  |
| 243852_at    | LUC7L2         | 3,102740237  | 3,004228687  | 0,098511551 |  |
| 1553843_at   | C10orf67       | 0,052199481  | -0,046302147 | 0,098501627 |  |
| 203421_at    | TP53I11        | 0,052199481  | -0,046302147 | 0,098501627 |  |
| 206553_at    | OAS2           | 0,052199481  | -0,046302147 | 0,098501627 |  |
| 221119_at    | ARHGEF38       | 0,052199481  | -0,046302147 | 0,098501627 |  |
| 244409_at    | CCDC154        | 0,052199481  | -0,046302147 | 0,098501627 |  |
| 209189_at    | FOS            | 0,945567441  | 0,847075464  | 0,098491978 |  |
| 213878_at    | PYROXD1        | 0,945567441  | 0,847075464  | 0,098491978 |  |
| 215412_x_at  | LOC100132832 / | 0,945567441  | 0,847075464  | 0,098491978 |  |
| 226591_at    | LOC100506965   | 0,945567441  | 0,847075464  | 0,098491978 |  |
| 1553285_s_at | RAD9B          | -1,639579028 | -1,738067356 | 0,098488328 |  |
| 1562007_at   | -              | -1,639579028 | -1,738067356 | 0,098488328 |  |
| 1562682_at   | RORA           | -1,639579028 | -1,738067356 | 0,098488328 |  |
| 1567527_at   | -              | -1,639579028 | -1,738067356 | 0,098488328 |  |
| 1569944_at   | -              | -1,639579028 | -1,738067356 | 0,098488328 |  |
| 208442_s_at  | ATM            | -1,639579028 | -1,738067356 | 0,098488328 |  |
| 208797_s_at  | GOLGA8A        | -1,639579028 | -1,738067356 | 0,098488328 |  |
| 216416_at    | -              | -1,639579028 | -1,738067356 | 0,098488328 |  |
| 226490_at    | NHSL1          | -1,639579028 | -1,738067356 | 0,098488328 |  |
| 228390_at    | RAB30          | -1,639579028 | -1,738067356 | 0,098488328 |  |
| 228973_at    | DLG2           | -1,639579028 | -1,738067356 | 0,098488328 |  |
| 231601_at    | LOC100507224   | -1,639579028 | -1,738067356 | 0,098488328 |  |
| 232378_at    | SLC5A9         | -1,639579028 | -1,738067356 | 0,098488328 |  |
| 232512_at    | -              | -1,639579028 | -1,738067356 | 0,098488328 |  |
| 233831_at    | LOC100291666   | -1,639579028 | -1,738067356 | 0,098488328 |  |
| 234553_at    | -              | -1,639579028 | -1,738067356 | 0,098488328 |  |
| 235563_at    | GPRC5A         | -1,639579028 | -1,738067356 | 0,098488328 |  |
| 235676_at    | -              | -1,639579028 | -1,738067356 | 0,098488328 |  |
| 235951_s_at  | ZNF688         | -1,639579028 | -1,738067356 | 0,098488328 |  |
| 237469_at    | TOP2A          | -1,639579028 | -1,738067356 | 0,098488328 |  |
| 238033_at    | HEXDC          | -1,639579028 | -1,738067356 | 0,098488328 |  |
| 239140_at    | -              | -1,639579028 | -1,738067356 | 0,098488328 |  |
| 242634_at    | GATAD1         | -1,639579028 | -1,738067356 | 0,098488328 |  |
| 243835_at    | ZDHHC21        | -1,639579028 | -1,738067356 | 0,098488328 |  |
| 214707_x_at  | ALMS1          | 1,567778694  | 1,469325098  | 0,098453596 |  |
| 226131_s_at  | RPS16          | 8,380322394  | 8,281905277  | 0,098417117 |  |
| 202081_at    | IER2           | 5,13582221   | 5,037433789  | 0,098388421 |  |
| 1555893_at   | -              | -2,236765673 | -2,335104118 | 0,098338445 |  |
| 1556700_a_at | -              | -2,236765673 | -2,335104118 | 0,098338445 |  |
| 1556711_at   | FAM216B        | -2,236765673 | -2,335104118 | 0,098338445 |  |
| 1557063_at   | DICER1-AS1     | -2,236765673 | -2,335104118 | 0,098338445 |  |
| 1558947_at   | -              | -2,236765673 | -2,335104118 | 0,098338445 |  |
| 1561169_at   | -              | -2,236765673 | -2,335104118 | 0,098338445 |  |
| 1566440_at   | CTNND2         | -2,236765673 | -2,335104118 | 0,098338445 |  |
| 1566571_at   | -              | -2,236765673 | -2,335104118 | 0,098338445 |  |
| 201859_at    | SRGN           | -2,236765673 | -2,335104118 | 0,098338445 |  |
| 207470_at    | -              | -2,236765673 | -2,335104118 | 0,098338445 |  |
| 211064_at    | ZNF493         | -2,236765673 | -2,335104118 | 0,098338445 |  |
| 214160_at    | -              | -2,236765673 | -2,335104118 | 0,098338445 |  |
| 216642_at    | -              | -2,236765673 | -2,335104118 | 0,098338445 |  |
| 217513_at    | MILR1          | -2,236765673 | -2,335104118 | 0,098338445 |  |

|              |                  |              |              |             |  |
|--------------|------------------|--------------|--------------|-------------|--|
| 224153_s_at  | -                | -2,236765673 | -2,335104118 | 0,098338445 |  |
| 230539_at    | FAM182A          | -2,236765673 | -2,335104118 | 0,098338445 |  |
| 231093_at    | FCRL3            | -2,236765673 | -2,335104118 | 0,098338445 |  |
| 232131_at    | LOC100506874     | -2,236765673 | -2,335104118 | 0,098338445 |  |
| 233671_at    | -                | -2,236765673 | -2,335104118 | 0,098338445 |  |
| 234178_at    | -                | -2,236765673 | -2,335104118 | 0,098338445 |  |
| 239472_at    | -                | -2,236765673 | -2,335104118 | 0,098338445 |  |
| 241031_at    | C2CD4A           | -2,236765673 | -2,335104118 | 0,098338445 |  |
| 241543_at    | -                | -2,236765673 | -2,335104118 | 0,098338445 |  |
| 218704_at    | RNF43            | -0,43775896  | -0,536087151 | 0,09832819  |  |
| 230035_at    | BOC              | -0,43775896  | -0,536087151 | 0,09832819  |  |
| 230989_s_at  | TSSK6            | -0,43775896  | -0,536087151 | 0,09832819  |  |
| 235668_at    | PRDM1            | -0,43775896  | -0,536087151 | 0,09832819  |  |
| 239372_at    | -                | -0,43775896  | -0,536087151 | 0,09832819  |  |
| 239892_at    | -                | -0,43775896  | -0,536087151 | 0,09832819  |  |
| 239917_at    | -                | -0,43775896  | -0,536087151 | 0,09832819  |  |
| 243209_at    | KCNQ4            | -0,43775896  | -0,536087151 | 0,09832819  |  |
| 203469_s_at  | CDK10            | 1,496984567  | 1,398700978  | 0,098283589 |  |
| 204226_at    | STAU2            | 1,496984567  | 1,398700978  | 0,098283589 |  |
| 203659_s_at  | TRIM13           | 2,804079361  | 2,705818724  | 0,098260638 |  |
| 212708_at    | MSL1             | 3,109000457  | 3,010820719  | 0,098179738 |  |
| 203412_at    | LZTR1            | 1,251994932  | 1,153866761  | 0,098128171 |  |
| 202062_s_at  | SEL1L            | 1,422536444  | 1,324440845  | 0,098095599 |  |
| 202699_s_at  | TMEM63A          | 0,255492549  | 0,157549243  | 0,097943306 |  |
| 211059_s_at  | GOLGA2           | 0,255492549  | 0,157549243  | 0,097943306 |  |
| 220346_at    | MTHFD2L          | 0,255492549  | 0,157549243  | 0,097943306 |  |
| 1552846_s_at | RAB42            | 0,57782909   | 0,479907041  | 0,09792205  |  |
| 201939_at    | PLK2             | 0,57782909   | 0,479907041  | 0,09792205  |  |
| 218783_at    | INTS7            | 0,57782909   | 0,479907041  | 0,09792205  |  |
| 229251_s_at  | TPCN2            | 0,57782909   | 0,479907041  | 0,09792205  |  |
| 235475_at    | SERP1            | 0,57782909   | 0,479907041  | 0,09792205  |  |
| 226488_at    | RCCD1            | 3,088871381  | 2,990953566  | 0,097917815 |  |
| 229200_at    | -                | 1,578645857  | 1,480766833  | 0,097879024 |  |
| 218741_at    | CENPM            | 2,81177561   | 2,713921281  | 0,097854329 |  |
| 224693_at    | FAM210B          | 2,901063789  | 2,803210557  | 0,097853232 |  |
| 214363_s_at  | MATR3 /// SNHG   | 6,802380078  | 6,704537798  | 0,097842281 |  |
| 213460_x_at  | NSUN5P2          | 2,506929603  | 2,409170778  | 0,097758825 |  |
| 210524_x_at  | -                | 3,21379258   | 3,116064987  | 0,097727592 |  |
| 202591_s_at  | MIR5096 /// SSB  | 6,913223426  | 6,815536928  | 0,097686498 |  |
| 1560992_at   | LOC400590        | -3,250025915 | -3,347710726 | 0,097684811 |  |
| 1562780_at   | -                | -3,250025915 | -3,347710726 | 0,097684811 |  |
| 1568925_at   | MYLK3            | -3,250025915 | -3,347710726 | 0,097684811 |  |
| 1569577_x_at | -                | -3,250025915 | -3,347710726 | 0,097684811 |  |
| 240734_at    | LOC100507221     | -3,250025915 | -3,347710726 | 0,097684811 |  |
| 223370_at    | PLEKHA3          | 3,304956562  | 3,207279726  | 0,097676835 |  |
| 203743_s_at  | TDG              | 4,968262591  | 4,870603662  | 0,097658929 |  |
| 209905_at    | HOXA10-HOXA9     | 0,962260738  | 0,864649967  | 0,097610771 |  |
| 237202_at    | PGPEP1           | 0,962260738  | 0,864649967  | 0,097610771 |  |
| 202939_at    | ZMPSTE24         | 4,729929934  | 4,632345568  | 0,097584366 |  |
| 207974_s_at  | SKP1             | 5,68207279   | 5,584587791  | 0,097484999 |  |
| 227715_at    | LOC100233156 /   | 1,434549838  | 1,337086025  | 0,097463813 |  |
| 218488_at    | EIF2B3           | 3,512821151  | 3,415371412  | 0,09744974  |  |
| 1552853_at   | VWA5B1           | -2,311268652 | -2,408705138 | 0,097436486 |  |
| 1562966_at   | KIAA1217         | -2,311268652 | -2,408705138 | 0,097436486 |  |
| 1569089_a_at | FLJ35390 /// LOC | -2,311268652 | -2,408705138 | 0,097436486 |  |
| 1570476_at   | -                | -2,311268652 | -2,408705138 | 0,097436486 |  |

|              |                  |              |              |             |  |
|--------------|------------------|--------------|--------------|-------------|--|
| 204619_s_at  | VCAN             | -2,311268652 | -2,408705138 | 0,097436486 |  |
| 207994_s_at  | OPRM1            | -2,311268652 | -2,408705138 | 0,097436486 |  |
| 214053_at    | ERBB4            | -2,311268652 | -2,408705138 | 0,097436486 |  |
| 215752_at    | SIK2             | -2,311268652 | -2,408705138 | 0,097436486 |  |
| 217953_at    | PHF3             | -2,311268652 | -2,408705138 | 0,097436486 |  |
| 220673_s_at  | PPP4R4           | -2,311268652 | -2,408705138 | 0,097436486 |  |
| 220874_at    | -                | -2,311268652 | -2,408705138 | 0,097436486 |  |
| 227314_at    | ITGA2            | -2,311268652 | -2,408705138 | 0,097436486 |  |
| 230749_s_at  | CAMK2D           | -2,311268652 | -2,408705138 | 0,097436486 |  |
| 231248_at    | CST6             | -2,311268652 | -2,408705138 | 0,097436486 |  |
| 233882_s_at  | SEMA6D           | -2,311268652 | -2,408705138 | 0,097436486 |  |
| 235511_at    | RBM4             | -2,311268652 | -2,408705138 | 0,097436486 |  |
| 238516_at    | BMPR2            | -2,311268652 | -2,408705138 | 0,097436486 |  |
| 240212_at    | -                | -2,311268652 | -2,408705138 | 0,097436486 |  |
| 240301_at    | DPPA2            | -2,311268652 | -2,408705138 | 0,097436486 |  |
| 240931_s_at  | -                | -2,311268652 | -2,408705138 | 0,097436486 |  |
| 223707_at    | RPL27A /// SNOF  | 0,072842263  | -0,024572586 | 0,097414849 |  |
| 230239_at    | ROCK1            | 0,072842263  | -0,024572586 | 0,097414849 |  |
| 242422_at    | G3BP1            | 0,072842263  | -0,024572586 | 0,097414849 |  |
| 208695_s_at  | LOC100652821 /   | 7,992995898  | 7,8956002    | 0,097395698 |  |
| 213515_x_at  | HBG1 /// HBG2 // | 8,11768112   | 8,020326558  | 0,097354561 |  |
| 210667_s_at  | C21orf33         | 3,981211211  | 3,883869861  | 0,09734135  |  |
| 227577_at    | EXOC8            | 2,726400382  | 2,629059192  | 0,09734119  |  |
| 219097_x_at  | C19orf42         | 4,642435962  | 4,545117128  | 0,097318834 |  |
| 1553274_a_at | SNRNP48          | 2,589836943  | 2,492544876  | 0,097292068 |  |
| 210916_s_at  | CD44             | 1,515954005  | 1,418668082  | 0,097285923 |  |
| 227159_at    | GHDC             | 0,853119696  | 0,755840599  | 0,097279097 |  |
| 219192_at    | UBAP2            | 4,257970041  | 4,160749839  | 0,097220202 |  |
| 203727_at    | SKIV2L           | 2,077135162  | 1,979940779  | 0,097194383 |  |
| 212178_s_at  | POM121 /// POM   | 2,55541096   | 2,458228496  | 0,097182464 |  |
| 201462_at    | SCRN1            | 0,592200562  | 0,495031851  | 0,097168711 |  |
| 216064_s_at  | AGA              | 0,592200562  | 0,495031851  | 0,097168711 |  |
| 236030_at    | RCOR2            | 0,592200562  | 0,495031851  | 0,097168711 |  |
| 209797_at    | CNPY2            | 3,358484112  | 3,261354437  | 0,097129675 |  |
| 1553567_s_at | ATP6             | 8,056442163  | 7,959353442  | 0,097088721 |  |
| 218046_s_at  | LOC100652993 /   | 3,664184451  | 3,56709884   | 0,097085611 |  |
| 221972_s_at  | SDF4             | 3,000043914  | 2,902971658  | 0,097072257 |  |
| 1553453_at   | ASB14            | -1,518072576 | -1,615132408 | 0,097059832 |  |
| 1554689_a_at | NLGN4X           | -1,518072576 | -1,615132408 | 0,097059832 |  |
| 1561480_a_at | -                | -1,518072576 | -1,615132408 | 0,097059832 |  |
| 1564536_at   | ASB10            | -1,518072576 | -1,615132408 | 0,097059832 |  |
| 207695_s_at  | IGSF1            | -1,518072576 | -1,615132408 | 0,097059832 |  |
| 208601_s_at  | TUBB1            | -1,518072576 | -1,615132408 | 0,097059832 |  |
| 216900_s_at  | CHRNA4           | -1,518072576 | -1,615132408 | 0,097059832 |  |
| 220481_at    | GPR75            | -1,518072576 | -1,615132408 | 0,097059832 |  |
| 222198_at    | -                | -1,518072576 | -1,615132408 | 0,097059832 |  |
| 225667_s_at  | FAM84A           | -1,518072576 | -1,615132408 | 0,097059832 |  |
| 229259_at    | GFAP             | -1,518072576 | -1,615132408 | 0,097059832 |  |
| 230824_at    | 10.03.15         | -1,518072576 | -1,615132408 | 0,097059832 |  |
| 231083_at    | ETV5             | -1,518072576 | -1,615132408 | 0,097059832 |  |
| 236654_s_at  | -                | -1,518072576 | -1,615132408 | 0,097059832 |  |
| 237055_at    | LOC100506174     | -1,518072576 | -1,615132408 | 0,097059832 |  |
| 238756_at    | GAS2L3           | -1,518072576 | -1,615132408 | 0,097059832 |  |
| 239619_at    | -                | -1,518072576 | -1,615132408 | 0,097059832 |  |
| 239812_s_at  | IQCH             | -1,518072576 | -1,615132408 | 0,097059832 |  |
| 240437_at    | CASP9            | -1,518072576 | -1,615132408 | 0,097059832 |  |

|              |                   |              |              |             |  |
|--------------|-------------------|--------------|--------------|-------------|--|
| 241660_at    | -                 | -1,518072576 | -1,615132408 | 0,097059832 |  |
| 203078_at    | CUL2              | 0,97328325   | 0,876248481  | 0,097034769 |  |
| 1557135_at   | -                 | 0,273439642  | 0,176436073  | 0,097003569 |  |
| 220019_s_at  | ZNF224            | 0,273439642  | 0,176436073  | 0,097003569 |  |
| 228427_at    | FBXO16            | 0,273439642  | 0,176436073  | 0,097003569 |  |
| 238920_at    | -                 | 0,273439642  | 0,176436073  | 0,097003569 |  |
| 1555723_at   | -                 | -2,359436556 | -2,456406426 | 0,09696987  |  |
| 1556571_at   | LOC100506538 /    | -2,359436556 | -2,456406426 | 0,09696987  |  |
| 1557052_at   | -                 | -2,359436556 | -2,456406426 | 0,09696987  |  |
| 1557068_at   | LOC100505782      | -2,359436556 | -2,456406426 | 0,09696987  |  |
| 1560340_s_at | RP9P              | -2,359436556 | -2,456406426 | 0,09696987  |  |
| 1560863_a_at | -                 | -2,359436556 | -2,456406426 | 0,09696987  |  |
| 1562216_at   | -                 | -2,359436556 | -2,456406426 | 0,09696987  |  |
| 1566582_x_at | -                 | -2,359436556 | -2,456406426 | 0,09696987  |  |
| 205850_s_at  | GABRB3            | -2,359436556 | -2,456406426 | 0,09696987  |  |
| 207731_at    | -                 | -2,359436556 | -2,456406426 | 0,09696987  |  |
| 211273_s_at  | TBX1              | -2,359436556 | -2,456406426 | 0,09696987  |  |
| 213071_at    | DPT               | -2,359436556 | -2,456406426 | 0,09696987  |  |
| 215615_x_at  | -                 | -2,359436556 | -2,456406426 | 0,09696987  |  |
| 217385_at    | -                 | -2,359436556 | -2,456406426 | 0,09696987  |  |
| 220075_s_at  | CDHR5             | -2,359436556 | -2,456406426 | 0,09696987  |  |
| 221469_at    | GPR32             | -2,359436556 | -2,456406426 | 0,09696987  |  |
| 231622_at    | ASB17             | -2,359436556 | -2,456406426 | 0,09696987  |  |
| 232927_at    | -                 | -2,359436556 | -2,456406426 | 0,09696987  |  |
| 237261_at    | ANGPT2            | -2,359436556 | -2,456406426 | 0,09696987  |  |
| 237999_at    | -                 | -2,359436556 | -2,456406426 | 0,09696987  |  |
| 238984_at    | REG4              | -2,359436556 | -2,456406426 | 0,09696987  |  |
| 241579_at    | -                 | -2,359436556 | -2,456406426 | 0,09696987  |  |
| 241967_at    | -                 | -2,359436556 | -2,456406426 | 0,09696987  |  |
| 223880_x_at  | C20orf24 /// TGIF | 6,372808442  | 6,2758742    | 0,096934242 |  |
| 229716_at    | -                 | 1,976645579  | 1,879785595  | 0,096859984 |  |
| 208697_s_at  | EIF3E             | 7,317944519  | 7,221159724  | 0,096784795 |  |
| 227018_at    | DPP8              | 1,923647937  | 1,826973888  | 0,096674049 |  |
| 225795_at    | C22orf32          | 3,469688722  | 3,373018423  | 0,096670299 |  |
| 203805_s_at  | FANCA             | 1,187200746  | 1,090553537  | 0,096647209 |  |
| 211043_s_at  | CLTB              | 3,188003814  | 3,091398163  | 0,096605651 |  |
| 214751_at    | ZNF468            | 3,451082821  | 3,354479478  | 0,096603343 |  |
| 225904_at    | CCSAP             | 3,164152611  | 3,067567462  | 0,096585149 |  |
| 207417_s_at  | ZNF177 /// ZNF5   | 1,805273023  | 1,708698295  | 0,096574728 |  |
| 1554905_x_at | FRMD8             | 1,369290453  | 1,272721751  | 0,096568702 |  |
| 215749_s_at  | GORASP1           | 1,369290453  | 1,272721751  | 0,096568702 |  |
| 219409_at    | SNIP1             | 2,089851283  | 1,993317152  | 0,096534131 |  |
| 48030_i_at   | C5orf4            | 3,41414682   | 3,317734938  | 0,096411882 |  |
| 218178_s_at  | CHMP1B            | 3,352164686  | 3,255815291  | 0,096349395 |  |
| 201960_s_at  | MYCBP2            | 4,286420174  | 4,190088544  | 0,09633163  |  |
| 230304_at    | -                 | 1,932146506  | 1,835911187  | 0,096235319 |  |
| 1554522_at   | CNNM2             | -0,394749123 | -0,490927335 | 0,096178212 |  |
| 1563903_x_at | -                 | -0,394749123 | -0,490927335 | 0,096178212 |  |
| 1569393_at   | MGC15885          | -0,394749123 | -0,490927335 | 0,096178212 |  |
| 209138_x_at  | IGLC1             | -0,394749123 | -0,490927335 | 0,096178212 |  |
| 214462_at    | SOCS6             | -0,394749123 | -0,490927335 | 0,096178212 |  |
| 216504_s_at  | SLC39A8           | -0,394749123 | -0,490927335 | 0,096178212 |  |
| 223905_at    | CCDC135           | -0,394749123 | -0,490927335 | 0,096178212 |  |
| 241166_at    | -                 | -0,394749123 | -0,490927335 | 0,096178212 |  |
| 242437_at    | -                 | -0,394749123 | -0,490927335 | 0,096178212 |  |
| 218195_at    | C6orf211          | 4,344876891  | 4,248708657  | 0,096168234 |  |

|              |                |              |              |             |  |
|--------------|----------------|--------------|--------------|-------------|--|
| 1566480_x_at | C17orf104      | -0,759588698 | -0,855751026 | 0,096162328 |  |
| 203666_at    | CXCL12         | -0,759588698 | -0,855751026 | 0,096162328 |  |
| 211107_s_at  | AURKC          | -0,759588698 | -0,855751026 | 0,096162328 |  |
| 222897_s_at  | ZFP64          | -0,759588698 | -0,855751026 | 0,096162328 |  |
| 223447_at    | REG4           | -0,759588698 | -0,855751026 | 0,096162328 |  |
| 233535_at    | ATP13A4        | -0,759588698 | -0,855751026 | 0,096162328 |  |
| 238252_at    | -              | -0,759588698 | -0,855751026 | 0,096162328 |  |
| 239485_at    | CDH4           | -0,759588698 | -0,855751026 | 0,096162328 |  |
| 239925_at    | -              | -0,759588698 | -0,855751026 | 0,096162328 |  |
| 241517_at    | -              | -0,759588698 | -0,855751026 | 0,096162328 |  |
| 205135_s_at  | NUFIP1         | 2,963199262  | 2,867091644  | 0,096107618 |  |
| 229759_s_at  | VEPH1          | 1,814495998  | 1,718396606  | 0,096099392 |  |
| 208794_s_at  | SMARCA4        | 6,70402539   | 6,60795278   | 0,09607261  |  |
| 210912_x_at  | GSTM4          | 0,613492853  | 0,51742585   | 0,096067003 |  |
| 221889_at    | KCTD13         | 0,613492853  | 0,51742585   | 0,096067003 |  |
| 230134_s_at  | RC3H2          | 0,613492853  | 0,51742585   | 0,096067003 |  |
| 208433_s_at  | LRP8           | 1,614289682  | 1,518263577  | 0,096026104 |  |
| 202268_s_at  | NAE1           | 5,627082064  | 5,531136224  | 0,095945841 |  |
| 1570237_at   | -              | 1,937784532  | 1,841838775  | 0,095945757 |  |
| 227160_s_at  | NDUFAF5        | 3,27186005   | 3,175947691  | 0,095912359 |  |
| 224691_at    | UHMK1          | 5,554513056  | 5,458610413  | 0,095902643 |  |
| 213653_at    | METTL3         | 2,721505869  | 2,625627364  | 0,095878505 |  |
| 206185_at    | CRYBB1         | 0,103263601  | 0,007421914  | 0,095841688 |  |
| 221785_at    | WIZ            | 0,103263601  | 0,007421914  | 0,095841688 |  |
| 236504_x_at  | C6orf52        | 1,46610492   | 1,370274469  | 0,095830451 |  |
| 218728_s_at  | CNIH4          | 3,405017566  | 3,309203139  | 0,095814427 |  |
| 230243_at    | TRMT10A        | 1,296557217  | 1,200746069  | 0,095811148 |  |
| 213935_at    | ABHD5          | 0,882651021  | 0,786897721  | 0,095753299 |  |
| 228490_at    | ABHD2          | 3,508091848  | 3,412387088  | 0,095704761 |  |
| 244599_at    | -              | 2,854131948  | 2,758473378  | 0,09565857  |  |
| 231851_at    | RAVER2         | 1,000476627  | 0,904843258  | 0,095633369 |  |
| 202906_s_at  | NBN            | 3,986661073  | 3,891034012  | 0,09562706  |  |
| 218537_at    | HCFC1R1        | 1,69307511   | 1,59747851   | 0,0955966   |  |
| 225443_at    | DCP1A          | 2,886560922  | 2,791007185  | 0,095553737 |  |
| 217347_at    | -              | 1,946200473  | 1,85068474   | 0,095515732 |  |
| 225930_at    | NKIRAS1        | 1,946200473  | 1,85068474   | 0,095515732 |  |
| 204065_at    | CHST10         | 2,003776245  | 1,908311039  | 0,095465206 |  |
| 45749_at     | FAM65A         | 3,018119282  | 2,922681418  | 0,095437864 |  |
| 226794_at    | STXBP5         | 5,321407378  | 5,226006411  | 0,095400967 |  |
| 223309_x_at  | PNPLA8         | 2,392522438  | 2,297144887  | 0,095377551 |  |
| 225428_s_at  | DDX54          | 0,627515113  | 0,532164371  | 0,095350742 |  |
| 228144_at    | ZNF300         | 0,627515113  | 0,532164371  | 0,095350742 |  |
| 239979_at    | -              | 0,627515113  | 0,532164371  | 0,095350742 |  |
| 1553935_at   | MGC2848        | -2,479842156 | -2,575129729 | 0,095287573 |  |
| 1554810_at   | PLA2G4C        | -2,479842156 | -2,575129729 | 0,095287573 |  |
| 1556235_at   | LOC100506560 / | -2,479842156 | -2,575129729 | 0,095287573 |  |
| 1558796_a_at | -              | -2,479842156 | -2,575129729 | 0,095287573 |  |
| 1559598_at   | -              | -2,479842156 | -2,575129729 | 0,095287573 |  |
| 1562000_at   | LOC400620      | -2,479842156 | -2,575129729 | 0,095287573 |  |
| 1565554_at   | LOC127841      | -2,479842156 | -2,575129729 | 0,095287573 |  |
| 1565912_at   | LOC283693      | -2,479842156 | -2,575129729 | 0,095287573 |  |
| 1567390_at   | -              | -2,479842156 | -2,575129729 | 0,095287573 |  |
| 1568854_at   | LINC00240      | -2,479842156 | -2,575129729 | 0,095287573 |  |
| 1569080_at   | RNF165         | -2,479842156 | -2,575129729 | 0,095287573 |  |
| 1569287_at   | LINC00458      | -2,479842156 | -2,575129729 | 0,095287573 |  |
| 207452_s_at  | CNTN5          | -2,479842156 | -2,575129729 | 0,095287573 |  |

|              |                  |              |              |             |  |
|--------------|------------------|--------------|--------------|-------------|--|
| 210836_x_at  | PDE4D            | -2,479842156 | -2,575129729 | 0,095287573 |  |
| 211632_at    | IGHD /// IGHG1 / | -2,479842156 | -2,575129729 | 0,095287573 |  |
| 214566_at    | SMR3A            | -2,479842156 | -2,575129729 | 0,095287573 |  |
| 216723_at    | -                | -2,479842156 | -2,575129729 | 0,095287573 |  |
| 219642_s_at  | PEX5L            | -2,479842156 | -2,575129729 | 0,095287573 |  |
| 223965_at    | TRNAU1AP         | -2,479842156 | -2,575129729 | 0,095287573 |  |
| 224528_s_at  | KCNIP2           | -2,479842156 | -2,575129729 | 0,095287573 |  |
| 230913_at    | -                | -2,479842156 | -2,575129729 | 0,095287573 |  |
| 232881_at    | GNAS-AS1         | -2,479842156 | -2,575129729 | 0,095287573 |  |
| 233038_at    | -                | -2,479842156 | -2,575129729 | 0,095287573 |  |
| 233907_s_at  | SERTAD4          | -2,479842156 | -2,575129729 | 0,095287573 |  |
| 234793_at    | -                | -2,479842156 | -2,575129729 | 0,095287573 |  |
| 235561_at    | TXNL1            | -2,479842156 | -2,575129729 | 0,095287573 |  |
| 237556_at    | -                | -2,479842156 | -2,575129729 | 0,095287573 |  |
| 237949_at    | -                | -2,479842156 | -2,575129729 | 0,095287573 |  |
| 240192_at    | FLJ45983         | -2,479842156 | -2,575129729 | 0,095287573 |  |
| 217748_at    | ADIPOR1          | 3,436222554  | 3,340940512  | 0,095282042 |  |
| 203186_s_at  | S100A4           | 2,114952142  | 2,019703483  | 0,095248659 |  |
| 236267_at    | ZNF346           | 0,767063567  | 0,67181667   | 0,095246897 |  |
| 200078_s_at  | ATP6V0B          | 5,437635603  | 5,342425264  | 0,095210338 |  |
| 235204_at    | ENTPD7           | 1,556829052  | 1,461646549  | 0,095182502 |  |
| 1552609_s_at | IL28A /// IL28B  | -1,399512875 | -1,494668682 | 0,095155806 |  |
| 1560455_at   | LOC339166 /// W  | -1,399512875 | -1,494668682 | 0,095155806 |  |
| 1564084_at   | CAD              | -1,399512875 | -1,494668682 | 0,095155806 |  |
| 1564851_at   | -                | -1,399512875 | -1,494668682 | 0,095155806 |  |
| 1569683_at   | XYLB             | -1,399512875 | -1,494668682 | 0,095155806 |  |
| 206995_x_at  | SCARF1           | -1,399512875 | -1,494668682 | 0,095155806 |  |
| 210363_s_at  | SCN2B            | -1,399512875 | -1,494668682 | 0,095155806 |  |
| 211794_at    | FYB              | -1,399512875 | -1,494668682 | 0,095155806 |  |
| 215753_at    | -                | -1,399512875 | -1,494668682 | 0,095155806 |  |
| 216707_at    | -                | -1,399512875 | -1,494668682 | 0,095155806 |  |
| 217174_s_at  | APC2             | -1,399512875 | -1,494668682 | 0,095155806 |  |
| 220451_s_at  | BIRC7            | -1,399512875 | -1,494668682 | 0,095155806 |  |
| 232914_s_at  | SYTL2            | -1,399512875 | -1,494668682 | 0,095155806 |  |
| 237284_at    | DNAJB8           | -1,399512875 | -1,494668682 | 0,095155806 |  |
| 241000_at    | -                | -1,399512875 | -1,494668682 | 0,095155806 |  |
| 244077_at    | C10orf113        | -1,399512875 | -1,494668682 | 0,095155806 |  |
| 244847_at    | -                | -1,399512875 | -1,494668682 | 0,095155806 |  |
| 223165_s_at  | IP6K2            | 3,217273782  | 3,122166354  | 0,095107427 |  |
| 226848_at    | -                | 1,954567604  | 1,859476797  | 0,095090807 |  |
| 209482_at    | POP7             | 4,577555523  | 4,482467631  | 0,095087892 |  |
| 201511_at    | AAMP             | 4,569406661  | 4,474382017  | 0,095024644 |  |
| 1561417_x_at | -                | -3,342483913 | -3,437493426 | 0,095009513 |  |
| 1563055_at   | -                | -3,342483913 | -3,437493426 | 0,095009513 |  |
| 206091_at    | MATN3            | -3,342483913 | -3,437493426 | 0,095009513 |  |
| 65086_at     | YIPF2            | 3,443176398  | 3,348246509  | 0,094929889 |  |
| 226043_at    | GPSM1            | 2,35929703   | 2,264418116  | 0,094878913 |  |
| 240239_at    | ZNF566           | 2,35929703   | 2,264418116  | 0,094878913 |  |
| 219577_s_at  | ABCA7            | 0,900083947  | 0,805216064  | 0,094867883 |  |
| 1552651_a_at | RAD51L3-RFFL /   | 0,123193849  | 0,028364014  | 0,094829835 |  |
| 203578_s_at  | SLC7A6           | 0,123193849  | 0,028364014  | 0,094829835 |  |
| 205243_at    | SLC13A3          | 0,123193849  | 0,028364014  | 0,094829835 |  |
| 230273_at    | C6orf165         | 0,123193849  | 0,028364014  | 0,094829835 |  |
| 1555165_a_at | PGPEP1           | -0,366776884 | -0,461594427 | 0,094817543 |  |
| 1564674_a_at | CDC20B           | -0,366776884 | -0,461594427 | 0,094817543 |  |
| 214063_s_at  | TF               | -0,366776884 | -0,461594427 | 0,094817543 |  |

|             |                  |              |              |             |  |
|-------------|------------------|--------------|--------------|-------------|--|
| 220961_s_at | TBRG4            | -0,366776884 | -0,461594427 | 0,094817543 |  |
| 233197_at   | KLHL9            | -0,366776884 | -0,461594427 | 0,094817543 |  |
| 203526_s_at | APC              | 0,317354302  | 0,222599095  | 0,094755207 |  |
| 222716_s_at | SNX24            | 0,317354302  | 0,222599095  | 0,094755207 |  |
| 223769_x_at | HYI              | 1,318332599  | 1,223626587  | 0,094706012 |  |
| 227972_at   | TOR2A            | 1,318332599  | 1,223626587  | 0,094706012 |  |
| 223381_at   | NUF2             | 3,489018063  | 3,394350331  | 0,094667733 |  |
| 206936_x_at | -                | 1,780386218  | 1,685812099  | 0,094574119 |  |
| 205420_at   | PEX7             | 2,320980353  | 2,226407528  | 0,094572825 |  |
| 221634_at   | LOC100287195 /   | 2,994644467  | 2,900133867  | 0,0945106   |  |
| 205193_at   | MAFF             | 1,493160564  | 1,398700978  | 0,094459586 |  |
| 235158_at   | TMEM209          | 2,783874823  | 2,689475799  | 0,094399024 |  |
| 43511_s_at  | ARRB1            | 2,025119313  | 1,930732138  | 0,094387176 |  |
| 221498_at   | SNX27            | 3,025418883  | 2,93104672   | 0,094372163 |  |
| 201562_s_at | SORD             | 2,369762403  | 2,275409734  | 0,094352669 |  |
| 201242_s_at | ATP1B1           | 0,648296226  | 0,553993624  | 0,094302601 |  |
| 235961_at   | GPR161           | 0,648296226  | 0,553993624  | 0,094302601 |  |
| 229806_at   | QRICH1           | 0,911589958  | 0,817300337  | 0,094289621 |  |
| 201530_x_at | EIF4A1 /// SENP3 | 7,536318821  | 7,442041109  | 0,094277711 |  |
| 203837_at   | MAP3K5           | 4,014272998  | 3,920040657  | 0,094232341 |  |
| 204983_s_at | GPC4             | 2,236584753  | 2,14244844   | 0,094136313 |  |
| 225584_at   | HCG18            | 1,973904239  | 1,879785595  | 0,094118643 |  |
| 225173_at   | ARHGAP18         | 2,945117939  | 2,851017268  | 0,094100671 |  |
| 212313_at   | CHMP7            | 3,24026957   | 3,146317015  | 0,093952556 |  |
| 222661_at   | AGGF1            | 2,8571110344 | 2,763166224  | 0,093944119 |  |
| 37384_at    | PPM1F            | 2,034358528  | 1,940432851  | 0,093925676 |  |
| 212795_at   | KIAA1033         | 3,378314944  | 3,284389368  | 0,093925576 |  |
| 216177_at   | -                | 1,655931423  | 1,562009954  | 0,093921469 |  |
| 227539_at   | GNA13            | 1,504602299  | 1,410714371  | 0,093887927 |  |
| 201788_at   | DDX42            | 3,620156261  | 3,526272152  | 0,093884109 |  |
| 231839_at   | PDE12            | 3,904829675  | 3,810956512  | 0,093873163 |  |
| 201339_s_at | SCP2             | 4,454147865  | 4,360286277  | 0,093861588 |  |
| 228766_at   | CD36             | 4,972388731  | 4,878554857  | 0,093833875 |  |
| 207163_s_at | AKT1             | 2,796341835  | 2,702564916  | 0,093776919 |  |
| 201585_s_at | SFPQ             | 4,763255815  | 4,669482912  | 0,093772903 |  |
| 228013_at   | PPP2R2A          | 2,466546243  | 2,372786857  | 0,093759386 |  |
| 212438_at   | SNRNP27          | 3,527851575  | 3,434130109  | 0,093721466 |  |
| 218431_at   | C14orf133        | 2,623460554  | 2,529740643  | 0,093719911 |  |
| 226240_at   | TADA2B           | 1,982112682  | 1,888402606  | 0,093710077 |  |
| 205252_at   | ZNF174           | 1,094335495  | 1,000684521  | 0,093650974 |  |
| 206968_s_at | NFRKB            | 1,094335495  | 1,000684521  | 0,093650974 |  |
| 235081_x_at | TRIM65           | 2,146943689  | 2,053299695  | 0,093643994 |  |
| 237333_at   | RBBP4            | 1,339784194  | 1,246149888  | 0,093634306 |  |
| 213499_at   | CLCN2            | 0,661985843  | 0,568365095  | 0,093620747 |  |
| 214828_s_at | RRP7A /// RRP7B  | 0,661985843  | 0,568365095  | 0,093620747 |  |
| 220153_at   | ENTPD7           | 1,247462054  | 1,153866761  | 0,093595292 |  |
| 221291_at   | ULBP2            | 1,247462054  | 1,153866761  | 0,093595292 |  |
| 200726_at   | PPP1CC           | 6,28609959   | 6,192508474  | 0,093591116 |  |
| 226917_s_at | ANAPC4           | 3,408067074  | 3,314541423  | 0,093525651 |  |
| 31846_at    | RHOD             | 2,751427511  | 2,657904765  | 0,093522746 |  |
| 209998_at   | PIGO             | 1,512180019  | 1,418668082  | 0,093511937 |  |
| 218375_at   | NUDT9            | 2,450859799  | 2,357351836  | 0,093507962 |  |
| 225176_at   | LNPEP            | 2,512607472  | 2,419116683  | 0,093490789 |  |
| 224967_at   | UGCG             | 4,015606497  | 3,922140371  | 0,093466125 |  |
| 214924_s_at | TRAK1            | 1,735773781  | 1,642321262  | 0,093452519 |  |
| 1557964_at  | EIF4G2           | 0,928678725  | 0,835239052  | 0,093439673 |  |



|              |                  |              |              |             |  |
|--------------|------------------|--------------|--------------|-------------|--|
| 207265_s_at  | KDELR3           | 0,928678725  | 0,835239052  | 0,093439673 |  |
| 232347_x_at  | -                | 0,928678725  | 0,835239052  | 0,093439673 |  |
| 225948_at    | APOPT1 /// KLC1  | 3,298397722  | 3,204982027  | 0,093415695 |  |
| 218867_s_at  | C12orf49         | 1,666156729  | 1,572742379  | 0,09341435  |  |
| 223545_at    | FANCD2           | 1,666156729  | 1,572742379  | 0,09341435  |  |
| 217877_s_at  | GPBP1L1          | 3,388643755  | 3,295230443  | 0,093413312 |  |
| 201191_at    | PITPNA           | 2,151803104  | 2,058399602  | 0,093403502 |  |
| 1553126_a_at | SLC39A12         | -2,597496523 | -2,690860744 | 0,093364221 |  |
| 1554308_s_at | GABRA2           | -2,597496523 | -2,690860744 | 0,093364221 |  |
| 1555046_at   | CENPI            | -2,597496523 | -2,690860744 | 0,093364221 |  |
| 1559587_at   | SYMPK            | -2,597496523 | -2,690860744 | 0,093364221 |  |
| 1569176_at   | TMPRSS12         | -2,597496523 | -2,690860744 | 0,093364221 |  |
| 1569674_at   | LOC100287765     | -2,597496523 | -2,690860744 | 0,093364221 |  |
| 205638_at    | BAI3             | -2,597496523 | -2,690860744 | 0,093364221 |  |
| 207182_at    | GABRA6           | -2,597496523 | -2,690860744 | 0,093364221 |  |
| 208582_s_at  | DUX1 /// DUX3 // | -2,597496523 | -2,690860744 | 0,093364221 |  |
| 210147_at    | ART3             | -2,597496523 | -2,690860744 | 0,093364221 |  |
| 210262_at    | CRISP2           | -2,597496523 | -2,690860744 | 0,093364221 |  |
| 220177_s_at  | TMPRSS3          | -2,597496523 | -2,690860744 | 0,093364221 |  |
| 223698_at    | SLC25A36         | -2,597496523 | -2,690860744 | 0,093364221 |  |
| 226535_at    | ITGB6            | -2,597496523 | -2,690860744 | 0,093364221 |  |
| 227478_at    | SETBP1           | -2,597496523 | -2,690860744 | 0,093364221 |  |
| 230993_s_at  | C6orf118         | -2,597496523 | -2,690860744 | 0,093364221 |  |
| 231750_at    | PCDHB4           | -2,597496523 | -2,690860744 | 0,093364221 |  |
| 231789_at    | PCDHB15          | -2,597496523 | -2,690860744 | 0,093364221 |  |
| 235326_at    | -                | -2,597496523 | -2,690860744 | 0,093364221 |  |
| 236029_at    | FAT3             | -2,597496523 | -2,690860744 | 0,093364221 |  |
| 240596_at    | -                | -2,597496523 | -2,690860744 | 0,093364221 |  |
| 241509_at    | -                | -2,597496523 | -2,690860744 | 0,093364221 |  |
| 1554208_at   | MEI1             | 0,152582607  | 0,059218869  | 0,093363738 |  |
| 221718_s_at  | AKAP13           | 0,152582607  | 0,059218869  | 0,093363738 |  |
| 228312_at    | PI16             | 0,152582607  | 0,059218869  | 0,093363738 |  |
| 234963_s_at  | FA2H             | 0,152582607  | 0,059218869  | 0,093363738 |  |
| 213111_at    | PIKFYVE          | 3,495722611  | 3,402394519  | 0,093328092 |  |
| 209704_at    | MTF2             | 3,436222554  | 3,343031718  | 0,093190836 |  |
| 211780_x_at  | DCTN1            | 2,840652551  | 2,747463672  | 0,093188879 |  |
| 224744_at    | IMPAD1           | 3,209137871  | 3,116064987  | 0,093072884 |  |
| 213047_x_at  | SET              | 5,998625791  | 5,905553422  | 0,093072368 |  |
| 233123_at    | SLC40A1          | 2,159061673  | 2,066015817  | 0,093045856 |  |
| 1555565_s_at | TAPBP            | 1,05337236   | 0,960386719  | 0,09298564  |  |
| 58780_s_at   | ARHGEF40         | 1,712939334  | 1,620074108  | 0,092865226 |  |
| 1552261_at   | WFDC2            | -1,2845686   | -1,377419394 | 0,092850794 |  |
| 1559042_at   | NDUFB6           | -1,2845686   | -1,377419394 | 0,092850794 |  |
| 1561367_a_at | LINC00540        | -1,2845686   | -1,377419394 | 0,092850794 |  |
| 1562903_at   | FLJ10661         | -1,2845686   | -1,377419394 | 0,092850794 |  |
| 1563814_at   | C2orf50          | -1,2845686   | -1,377419394 | 0,092850794 |  |
| 206803_at    | PDYN             | -1,2845686   | -1,377419394 | 0,092850794 |  |
| 211494_s_at  | SLC4A4           | -1,2845686   | -1,377419394 | 0,092850794 |  |
| 215270_at    | LFNG             | -1,2845686   | -1,377419394 | 0,092850794 |  |
| 215757_at    | PRKDC            | -1,2845686   | -1,377419394 | 0,092850794 |  |
| 219813_at    | LATS1            | -1,2845686   | -1,377419394 | 0,092850794 |  |
| 220400_at    | VPS13B           | -1,2845686   | -1,377419394 | 0,092850794 |  |
| 220687_at    | -                | -1,2845686   | -1,377419394 | 0,092850794 |  |
| 235308_at    | ZBTB20           | -1,2845686   | -1,377419394 | 0,092850794 |  |
| 241249_at    | LOC253039        | -1,2845686   | -1,377419394 | 0,092850794 |  |
| 242822_at    | MGC39584         | -1,2845686   | -1,377419394 | 0,092850794 |  |

|              |                 |              |              |             |  |
|--------------|-----------------|--------------|--------------|-------------|--|
| 204991_s_at  | NF2             | -0,325749314 | -0,41858459  | 0,092835276 |  |
| 205983_at    | DPEP1           | -0,325749314 | -0,41858459  | 0,092835276 |  |
| 206570_s_at  | PSG11           | -0,325749314 | -0,41858459  | 0,092835276 |  |
| 217966_s_at  | FAM129A         | -0,325749314 | -0,41858459  | 0,092835276 |  |
| 220561_at    | IGF2-AS         | -0,325749314 | -0,41858459  | 0,092835276 |  |
| 220705_s_at  | ADAMTS7 /// LOC | -0,325749314 | -0,41858459  | 0,092835276 |  |
| 228331_at    | C11orf31        | -0,325749314 | -0,41858459  | 0,092835276 |  |
| 234912_at    | -               | -0,325749314 | -0,41858459  | 0,092835276 |  |
| 213053_at    | HAUS5           | 2,001086023  | 1,908311039  | 0,092774984 |  |
| 223879_s_at  | OXR1            | 2,001086023  | 1,908311039  | 0,092774984 |  |
| 221485_at    | B4GALT5         | 4,324039713  | 4,231314909  | 0,092724804 |  |
| 203011_at    | IMPA1           | 4,391844214  | 4,299127518  | 0,092716696 |  |
| 227456_s_at  | C6orf136        | 3,059434754  | 2,966746113  | 0,092688641 |  |
| 202573_at    | CSNK1G2         | 3,217273782  | 3,124599694  | 0,092674087 |  |
| 209682_at    | CBLB            | 3,217273782  | 3,124599694  | 0,092674087 |  |
| 1557275_a_at | TLCD2           | -2,64318869  | -2,735862426 | 0,092673736 |  |
| 1558592_at   | -               | -2,64318869  | -2,735862426 | 0,092673736 |  |
| 1559288_at   | -               | -2,64318869  | -2,735862426 | 0,092673736 |  |
| 1559479_at   | LOC285540       | -2,64318869  | -2,735862426 | 0,092673736 |  |
| 1561365_at   | NRP1            | -2,64318869  | -2,735862426 | 0,092673736 |  |
| 1562321_at   | PDK4            | -2,64318869  | -2,735862426 | 0,092673736 |  |
| 215241_at    | ANO3            | -2,64318869  | -2,735862426 | 0,092673736 |  |
| 217334_at    | OR2J3           | -2,64318869  | -2,735862426 | 0,092673736 |  |
| 221874_at    | KIAA1324        | -2,64318869  | -2,735862426 | 0,092673736 |  |
| 223878_at    | INPP4B          | -2,64318869  | -2,735862426 | 0,092673736 |  |
| 228707_at    | CLDN23          | -2,64318869  | -2,735862426 | 0,092673736 |  |
| 230121_at    | C1orf133        | -2,64318869  | -2,735862426 | 0,092673736 |  |
| 231442_at    | ZBPB2           | -2,64318869  | -2,735862426 | 0,092673736 |  |
| 232606_at    | ANK2            | -2,64318869  | -2,735862426 | 0,092673736 |  |
| 233139_at    | -               | -2,64318869  | -2,735862426 | 0,092673736 |  |
| 233552_at    | -               | -2,64318869  | -2,735862426 | 0,092673736 |  |
| 234994_at    | TMEM200A        | -2,64318869  | -2,735862426 | 0,092673736 |  |
| 238272_at    | TPMT            | -2,64318869  | -2,735862426 | 0,092673736 |  |
| 238355_at    | -               | -2,64318869  | -2,735862426 | 0,092673736 |  |
| 238874_at    | LOC100506860    | -2,64318869  | -2,735862426 | 0,092673736 |  |
| 239622_at    | TRAP1           | -2,64318869  | -2,735862426 | 0,092673736 |  |
| 240370_at    | -               | -2,64318869  | -2,735862426 | 0,092673736 |  |
| 241586_at    | -               | -2,64318869  | -2,735862426 | 0,092673736 |  |
| 244303_at    | -               | -2,64318869  | -2,735862426 | 0,092673736 |  |
| 1557411_s_at | SLC25A43        | 1,751865623  | 1,659204017  | 0,092661606 |  |
| 1559461_at   | -               | 0,359971644  | 0,26733076   | 0,092640884 |  |
| 1563629_a_at | ERVK13-1        | 0,359971644  | 0,26733076   | 0,092640884 |  |
| 202192_s_at  | GAS7            | 0,359971644  | 0,26733076   | 0,092640884 |  |
| 239061_at    | TPRXL           | 0,359971644  | 0,26733076   | 0,092640884 |  |
| 235456_at    | -               | 2,883642771  | 2,791007185  | 0,092635586 |  |
| 213149_at    | DLAT            | 3,50998543   | 3,417357537  | 0,092627894 |  |
| 227343_at    | -               | -0,67289328  | -0,765504029 | 0,092610749 |  |
| 232605_s_at  | SPG20OS         | -0,67289328  | -0,765504029 | 0,092610749 |  |
| 236541_at    | ARSA            | -0,67289328  | -0,765504029 | 0,092610749 |  |
| 237082_at    | -               | -0,67289328  | -0,765504029 | 0,092610749 |  |
| 222757_s_at  | ZAK             | 1,820612054  | 1,728030156  | 0,092581897 |  |
| 215667_x_at  | LOC100132832 /  | 2,531373922  | 2,438805127  | 0,092568795 |  |
| 37170_at     | BMP2K           | 1,976645579  | 1,884100534  | 0,092545045 |  |
| 214919_s_at  | ANKHD1 /// ANK  | 1,269985355  | 1,177496821  | 0,092488534 |  |
| 214257_s_at  | -               | 3,807337009  | 3,714911743  | 0,092425266 |  |
| 217235_x_at  | IGLL5           | 0,171847695  | 0,079428135  | 0,09241956  |  |

|              |                 |              |              |             |  |
|--------------|-----------------|--------------|--------------|-------------|--|
| 232051_at    | CCDC102A        | 0,171847695  | 0,079428135  | 0,09241956  |  |
| 232357_at    | TTLL9           | 0,171847695  | 0,079428135  | 0,09241956  |  |
| 234436_x_at  | OBP2A           | 0,171847695  | 0,079428135  | 0,09241956  |  |
| 215004_s_at  | SUGP1           | 1,534677255  | 1,442269454  | 0,092407801 |  |
| 229091_s_at  | CCNJ            | 1,758252436  | 1,665902186  | 0,092350251 |  |
| 224628_at    | ERLEC1          | 3,983257322  | 3,891034012  | 0,09222331  |  |
| 207305_s_at  | TRAPPC8         | 3,598072957  | 3,505883949  | 0,092189008 |  |
| 223741_s_at  | TTYH2           | 0,82905153   | 0,73688026   | 0,09217127  |  |
| 229810_at    | -               | 0,82905153   | 0,73688026   | 0,09217127  |  |
| 222938_x_at  | ENPP3           | 4,977187694  | 4,885027942  | 0,092159752 |  |
| 226842_at    | FBXL20          | 2,540666392  | 2,448549499  | 0,092116893 |  |
| 1566509_s_at | FBXO9           | 4,043328971  | 3,951219941  | 0,09210903  |  |
| 214902_x_at  | -               | 0,95671774   | 0,864649967  | 0,092067773 |  |
| 228628_at    | SRGAP2C         | 0,95671774   | 0,864649967  | 0,092067773 |  |
| 225792_at    | HOOK1           | 3,746799001  | 3,654731437  | 0,092067563 |  |
| 227525_at    | GLCCI1          | 2,501229299  | 2,409170778  | 0,092058521 |  |
| 210473_s_at  | GPR125          | 1,542099044  | 1,450051551  | 0,092047493 |  |
| 222200_s_at  | BSDC1           | 2,416948786  | 2,324919719  | 0,092029067 |  |
| 203682_s_at  | IVD             | 1,373456798  | 1,281471383  | 0,091985415 |  |
| 211177_s_at  | TXNRD2          | 1,373456798  | 1,281471383  | 0,091985415 |  |
| 227248_at    | PLEKHH3         | 0,695652136  | 0,603679647  | 0,091972489 |  |
| 224076_s_at  | WHSC1L1         | 2,621710292  | 2,529740643  | 0,091969649 |  |
| 204899_s_at  | SAP30           | 1,897847661  | 1,805902329  | 0,091945332 |  |
| 232432_s_at  | SLC30A5         | 3,750808107  | 3,658934427  | 0,09187368  |  |
| 207808_s_at  | PROS1           | 4,84391367   | 4,752066034  | 0,091847635 |  |
| 1559361_at   | MACC1           | -1,240169874 | -1,332017329 | 0,091847455 |  |
| 1560891_a_at | LOC100505875    | -1,240169874 | -1,332017329 | 0,091847455 |  |
| 1561293_at   | -               | -1,240169874 | -1,332017329 | 0,091847455 |  |
| 1562447_a_at | LOC100506599    | -1,240169874 | -1,332017329 | 0,091847455 |  |
| 1563063_at   | -               | -1,240169874 | -1,332017329 | 0,091847455 |  |
| 1565406_a_at | LHX9            | -1,240169874 | -1,332017329 | 0,091847455 |  |
| 213845_at    | GRIK2           | -1,240169874 | -1,332017329 | 0,091847455 |  |
| 215238_s_at  | DOCK9           | -1,240169874 | -1,332017329 | 0,091847455 |  |
| 217614_at    | -               | -1,240169874 | -1,332017329 | 0,091847455 |  |
| 218903_s_at  | NABP2           | -1,240169874 | -1,332017329 | 0,091847455 |  |
| 223624_at    | ZFAND4          | -1,240169874 | -1,332017329 | 0,091847455 |  |
| 227809_at    | ZC3H6           | -1,240169874 | -1,332017329 | 0,091847455 |  |
| 230059_at    | DEAF1           | -1,240169874 | -1,332017329 | 0,091847455 |  |
| 231046_at    | HP07349 /// LOC | -1,240169874 | -1,332017329 | 0,091847455 |  |
| 233715_at    | -               | -1,240169874 | -1,332017329 | 0,091847455 |  |
| 235715_at    | SPRNP1          | -1,240169874 | -1,332017329 | 0,091847455 |  |
| 236753_at    | LOC154822       | -1,240169874 | -1,332017329 | 0,091847455 |  |
| 238268_at    | -               | -1,240169874 | -1,332017329 | 0,091847455 |  |
| 241630_at    | -               | -1,240169874 | -1,332017329 | 0,091847455 |  |
| 207120_at    | ZNF667          | 1,835789711  | 1,743944487  | 0,091845223 |  |
| 229388_at    | LOC100507212    | 1,283332461  | 1,191491281  | 0,09184118  |  |
| 231723_at    | SNX12           | 2,077135162  | 1,98530622   | 0,091828941 |  |
| 229519_at    | FXR1            | 3,330897748  | 3,239069096  | 0,091828652 |  |
| 210774_s_at  | NCOA4           | 4,625068394  | 4,533260944  | 0,091807449 |  |
| 225308_s_at  | TANC1           | 4,916735717  | 4,8249493    | 0,091786418 |  |
| 233898_s_at  | FGFR1OP2        | 2,663141434  | 2,571362843  | 0,091778591 |  |
| 1555037_a_at | IDH1            | 3,378314944  | 3,28656411   | 0,091750834 |  |
| 213762_x_at  | RBMX /// SNORD  | 5,858705693  | 5,766984279  | 0,091721415 |  |
| 209307_at    | SWAP70          | 2,626954721  | 2,53523821   | 0,091716511 |  |
| 225209_s_at  | UBE2J2          | 4,037433122  | 3,945725977  | 0,091707145 |  |
| 211159_s_at  | PPP2R5D         | 2,549899391  | 2,458228496  | 0,091670895 |  |

|              |                 |              |             |             |  |
|--------------|-----------------|--------------|-------------|-------------|--|
| 203609_s_at  | ALDH5A1         | -0,299034815 | -0,39061235 | 0,091577535 |  |
| 207770_x_at  | CSH2            | -0,299034815 | -0,39061235 | 0,091577535 |  |
| 211620_x_at  | LOC100506403 /  | -0,299034815 | -0,39061235 | 0,091577535 |  |
| 216603_at    | SLC7A8          | -0,299034815 | -0,39061235 | 0,091577535 |  |
| 222089_s_at  | C16orf71        | -0,299034815 | -0,39061235 | 0,091577535 |  |
| 227405_s_at  | FZD8            | -0,299034815 | -0,39061235 | 0,091577535 |  |
| 238591_at    | HEXDC           | -0,299034815 | -0,39061235 | 0,091577535 |  |
| 241150_at    | SPTAN1          | -0,299034815 | -0,39061235 | 0,091577535 |  |
| 243195_s_at  | ZNF551          | -0,299034815 | -0,39061235 | 0,091577535 |  |
| 213376_at    | ZBTB1           | 3,137452663  | 3,045906378 | 0,091546285 |  |
| 214484_s_at  | SIGMAR1         | 3,111496958  | 3,019999252 | 0,091497706 |  |
| 219767_s_at  | CRYZL1          | 2,084778276  | 1,993317152 | 0,091461124 |  |
| 233168_s_at  | SELO            | 2,084778276  | 1,993317152 | 0,091461124 |  |
| 244038_at    | WDR89           | 2,084778276  | 1,993317152 | 0,091461124 |  |
| 202381_at    | ADAM9           | 3,843828743  | 3,75237043  | 0,091458314 |  |
| 216446_at    | -               | 0,384950573  | 0,293518836 | 0,091431738 |  |
| 238527_at    | KIAA0664L3      | 0,384950573  | 0,293518836 | 0,091431738 |  |
| 209563_x_at  | CALM1 /// CALM  | 6,270964743  | 6,179548226 | 0,091416517 |  |
| 213088_s_at  | DNAJC9          | 5,834164609  | 5,742834983 | 0,091329626 |  |
| 213485_s_at  | ABCC10          | 2,635653293  | 2,544354523 | 0,09129877  |  |
| 227245_at    | NAA25           | 2,635653293  | 2,544354523 | 0,09129877  |  |
| 1553581_s_at | SREK1IP1        | 3,957816838  | 3,866529339 | 0,091287499 |  |
| 218817_at    | SPCS3           | 2,559073676  | 2,467842989 | 0,091230687 |  |
| 208754_s_at  | NAP1L1          | 4,841283944  | 4,750097438 | 0,091186506 |  |
| 219187_at    | FKBPL           | 2,344516784  | 2,253342112 | 0,091174672 |  |
| 202559_x_at  | CHTOP           | 3,676882273  | 3,585762986 | 0,091119288 |  |
| 223125_s_at  | C1orf21         | 2,035673598  | 1,944570415 | 0,091103183 |  |
| 202524_s_at  | SPOCK2          | 0,20027154   | 0,109221392 | 0,091050147 |  |
| 227358_at    | ZBTB46          | 0,20027154   | 0,109221392 | 0,091050147 |  |
| 224851_at    | CDK6            | 3,008105382  | 2,917077481 | 0,091027902 |  |
| 1557409_at   | -               | 0,715481152  | 0,624460759 | 0,091020392 |  |
| 223833_at    | WDR55           | 0,715481152  | 0,624460759 | 0,091020392 |  |
| 228263_at    | GRASP           | 0,715481152  | 0,624460759 | 0,091020392 |  |
| 230921_s_at  | -               | 0,715481152  | 0,624460759 | 0,091020392 |  |
| 209906_at    | C3AR1           | 1,481627361  | 1,390636111 | 0,09099125  |  |
| 200803_s_at  | TMBIM6          | 5,967957176  | 5,876972858 | 0,090984319 |  |
| 239205_s_at  | CR1 /// CR1L    | 2,201862497  | 2,110887591 | 0,090974906 |  |
| 209762_x_at  | SP110           | 2,854131948  | 2,763166224 | 0,090965724 |  |
| 200668_s_at  | UBE2D3          | 5,890669844  | 5,799709572 | 0,090960271 |  |
| 224564_s_at  | RTN3            | 3,994797458  | 3,903840511 | 0,090956947 |  |
| 212933_x_at  | RPL13 /// SNORL | 7,111293807  | 7,020358154 | 0,090935653 |  |
| 1553551_s_at | ND2             | 7,920503842  | 7,829574887 | 0,090928955 |  |
| 200032_s_at  | RPL9            | 7,766209003  | 7,675282385 | 0,090926618 |  |
| 201726_at    | ELAVL1          | 6,047030826  | 5,956125984 | 0,090904842 |  |
| 232141_at    | U2AF1           | 3,682769893  | 3,591931093 | 0,090838799 |  |
| 211558_s_at  | DHPS            | 3,952952896  | 3,862161446 | 0,090791451 |  |
| 212399_s_at  | VGLL4           | 2,206540699  | 2,115788273 | 0,090752427 |  |
| 203168_at    | ATF6B           | 0,984222186  | 0,893473268 | 0,090748918 |  |
| 1554249_a_at | ZNF638          | 0,859074518  | 0,768343791 | 0,090730728 |  |
| 213584_s_at  | CREBZF          | 0,57058931   | 0,479907041 | 0,090682269 |  |
| 220685_at    | FAM120C         | 0,57058931   | 0,479907041 | 0,090682269 |  |
| 221193_s_at  | ZCCHC10         | 2,827046023  | 2,7363693   | 0,090676723 |  |
| 205909_at    | POLE2           | 4,509619341  | 4,418957488 | 0,090661853 |  |
| 204779_s_at  | HOXB7           | 0,401366113  | 0,310717132 | 0,090648981 |  |
| 227851_s_at  | -               | 0,401366113  | 0,310717132 | 0,090648981 |  |
| 241976_at    | TCEA3           | 0,401366113  | 0,310717132 | 0,090648981 |  |

|              |                 |              |              |             |  |
|--------------|-----------------|--------------|--------------|-------------|--|
| 202802_at    | DHPS            | 3,234554895  | 3,14392006   | 0,090634835 |  |
| 210543_s_at  | PRKDC           | 3,972997622  | 3,882432751  | 0,09056487  |  |
| 214144_at    | POLR2D          | 1,104397092  | 1,013870809  | 0,090526283 |  |
| 241017_at    | RPL31 /// TBC1D | 1,104397092  | 1,013870809  | 0,090526283 |  |
| 1560690_at   | -               | -2,756478458 | -2,847001814 | 0,090523356 |  |
| 1560758_at   | -               | -2,756478458 | -2,847001814 | 0,090523356 |  |
| 1560810_at   | -               | -2,756478458 | -2,847001814 | 0,090523356 |  |
| 1563107_at   | -               | -2,756478458 | -2,847001814 | 0,090523356 |  |
| 1564656_at   | -               | -2,756478458 | -2,847001814 | 0,090523356 |  |
| 1570206_at   | -               | -2,756478458 | -2,847001814 | 0,090523356 |  |
| 210771_at    | PPARA           | -2,756478458 | -2,847001814 | 0,090523356 |  |
| 211655_at    | IGLC1           | -2,756478458 | -2,847001814 | 0,090523356 |  |
| 216070_at    | -               | -2,756478458 | -2,847001814 | 0,090523356 |  |
| 219864_s_at  | RCAN3           | -2,756478458 | -2,847001814 | 0,090523356 |  |
| 231173_at    | PYROXD1         | -2,756478458 | -2,847001814 | 0,090523356 |  |
| 231504_at    | CCDC148         | -2,756478458 | -2,847001814 | 0,090523356 |  |
| 231644_at    | -               | -2,756478458 | -2,847001814 | 0,090523356 |  |
| 232424_at    | PRDM16          | -2,756478458 | -2,847001814 | 0,090523356 |  |
| 236948_x_at  | SRSF11          | -2,756478458 | -2,847001814 | 0,090523356 |  |
| 237573_at    | -               | -2,756478458 | -2,847001814 | 0,090523356 |  |
| 240867_at    | -               | -2,756478458 | -2,847001814 | 0,090523356 |  |
| 242088_at    | KLHL24          | -2,756478458 | -2,847001814 | 0,090523356 |  |
| 214553_s_at  | ARPP19          | 1,865674241  | 1,775255987  | 0,090418254 |  |
| 212076_at    | MLL             | 0,728550685  | 0,638150376  | 0,090400309 |  |
| 217550_at    | ATF6            | 0,728550685  | 0,638150376  | 0,090400309 |  |
| 242369_x_at  | -               | 0,728550685  | 0,638150376  | 0,090400309 |  |
| 224468_s_at  | C19orf48        | 3,764356332  | 3,673964604  | 0,090391728 |  |
| 203026_at    | ZBTB5           | 3,161745659  | 3,071356473  | 0,090389186 |  |
| 1554471_a_at | ANKRD13C        | 1,314003737  | 1,223626587  | 0,090377149 |  |
| 201815_s_at  | TBC1D5          | 1,314003737  | 1,223626587  | 0,090377149 |  |
| 218969_at    | PAM16           | 2,799441827  | 2,709065209  | 0,090376618 |  |
| 202580_x_at  | FOXMI           | 2,361396186  | 2,271023131  | 0,090373055 |  |
| 209251_x_at  | TUBA1C          | 7,651341382  | 7,561013979  | 0,090327404 |  |
| 210830_s_at  | PON2            | 2,963199262  | 2,87289275   | 0,090306511 |  |
| 229356_x_at  | INO80           | 3,081249977  | 2,990953566  | 0,090296411 |  |
| 223455_at    | TCHP            | 2,31665944   | 2,226407528  | 0,090251912 |  |
| 1564194_a_at | MS4A15          | -1,173767127 | -1,264005341 | 0,090238214 |  |
| 200785_s_at  | LRP1            | -1,173767127 | -1,264005341 | 0,090238214 |  |
| 205610_at    | MYOM1           | -1,173767127 | -1,264005341 | 0,090238214 |  |
| 215557_at    | -               | -1,173767127 | -1,264005341 | 0,090238214 |  |
| 216029_at    | -               | -1,173767127 | -1,264005341 | 0,090238214 |  |
| 222712_s_at  | MUC13           | -1,173767127 | -1,264005341 | 0,090238214 |  |
| 223600_s_at  | KIAA1683        | -1,173767127 | -1,264005341 | 0,090238214 |  |
| 229423_at    | CHEK1           | -1,173767127 | -1,264005341 | 0,090238214 |  |
| 230211_at    | TRIP11          | -1,173767127 | -1,264005341 | 0,090238214 |  |
| 230433_at    | LOC729970       | -1,173767127 | -1,264005341 | 0,090238214 |  |
| 230855_at    | GATA4           | -1,173767127 | -1,264005341 | 0,090238214 |  |
| 223084_s_at  | CCNDBP1         | 3,497632487  | 3,407399455  | 0,090233032 |  |
| 211628_x_at  | FTH1P5          | 6,796477013  | 6,706264935  | 0,090212078 |  |
| 225392_at    | GFM2            | 3,80348216   | 3,713295978  | 0,090186181 |  |
| 238474_at    | NUP43           | 2,365585359  | 2,275409734  | 0,090175625 |  |
| 208764_s_at  | ATP5G2          | 6,062757787  | 5,972597079  | 0,090160707 |  |
| 203284_s_at  | HS2ST1 /// LOC3 | 4,233538894  | 4,143455947  | 0,090082947 |  |
| 214920_at    | THSD7A          | 1,414471577  | 1,324440845  | 0,090030732 |  |
| 218670_at    | PUS1            | 1,414471577  | 1,324440845  | 0,090030732 |  |
| 219861_at    | DNAJC17         | 1,414471577  | 1,324440845  | 0,090030732 |  |

|              |                 |              |              |             |  |
|--------------|-----------------|--------------|--------------|-------------|--|
| 207017_at    | RAB27B          | 3,700289946  | 3,61027875   | 0,090011196 |  |
| 200945_s_at  | SEC31A          | 4,851400868  | 4,761478085  | 0,089922783 |  |
| 212351_at    | EIF2B5          | 2,940912947  | 2,851017268  | 0,089895679 |  |
| 230032_at    | OSGEPL1         | 1,119359127  | 1,029536893  | 0,089822234 |  |
| 235698_at    | ZFP90           | 1,119359127  | 1,029536893  | 0,089822234 |  |
| 237306_at    | ZNF829          | 1,119359127  | 1,029536893  | 0,089822234 |  |
| 203738_at    | C5orf22         | 3,277429131  | 3,187631636  | 0,089797494 |  |
| 1557164_a_at | -               | -0,259832361 | -0,34958478  | 0,089752419 |  |
| 208269_s_at  | ADAM28          | -0,259832361 | -0,34958478  | 0,089752419 |  |
| 210628_x_at  | LTBP4           | -0,259832361 | -0,34958478  | 0,089752419 |  |
| 216641_s_at  | LAD1            | -0,259832361 | -0,34958478  | 0,089752419 |  |
| 234015_at    | -               | -0,259832361 | -0,34958478  | 0,089752419 |  |
| 236832_at    | ADCY10P1        | -0,259832361 | -0,34958478  | 0,089752419 |  |
| 242683_at    | LOC400643       | -0,259832361 | -0,34958478  | 0,089752419 |  |
| 224664_at    | ANAPC16         | 4,539590968  | 4,449849671  | 0,089741297 |  |
| 224372_at    | ND4             | 8,236486636  | 8,146766531  | 0,089720106 |  |
| 201684_s_at  | TOX4            | 3,706908684  | 3,617207412  | 0,089701272 |  |
| 45714_at     | HCFC1R1         | 2,036987472  | 1,947322213  | 0,089665259 |  |
| 1553984_s_at | DTYMK           | 4,41122478   | 4,321571774  | 0,089653006 |  |
| 227164_at    | SRSF1           | 2,745814053  | 2,656223838  | 0,089590215 |  |
| 201316_at    | PSMA2           | 3,205636958  | 3,116064987  | 0,089571971 |  |
| 212751_at    | UBE2N           | 4,563948403  | 4,474382017  | 0,089566386 |  |
| 218038_at    | ATP5SL          | 2,446911392  | 2,357351836  | 0,089559555 |  |
| 226981_at    | MLL             | 2,446911392  | 2,357351836  | 0,089559555 |  |
| 205327_s_at  | ACVR2A          | 0,425644434  | 0,336136178  | 0,089508256 |  |
| 213667_at    | LOC100862671 /  | 0,425644434  | 0,336136178  | 0,089508256 |  |
| 238746_at    | PXMP4           | 0,425644434  | 0,336136178  | 0,089508256 |  |
| 1556551_s_at | SLC39A6         | 0,747935635  | 0,658444279  | 0,089491356 |  |
| 231550_at    | XYLT2           | 0,747935635  | 0,658444279  | 0,089491356 |  |
| 216317_x_at  | RHCE            | 1,011212064  | 0,921731975  | 0,089480089 |  |
| 219811_at    | DGCR8 /// MIR13 | 1,233777334  | 1,144305291  | 0,089472043 |  |
| 219880_at    | LOC100507619    | 1,233777334  | 1,144305291  | 0,089472043 |  |
| 229035_s_at  | KLHDC4 /// LOC1 | 1,426552034  | 1,337086025  | 0,089466009 |  |
| 35150_at     | CD40            | 2,801762457  | 2,712304406  | 0,089458051 |  |
| 203060_s_at  | PAPSS2          | 1,748661581  | 1,659204017  | 0,089457565 |  |
| 210978_s_at  | TAGLN2          | 5,327862673  | 5,238417317  | 0,089445356 |  |
| 209644_x_at  | CDKN2A          | 6,570844973  | 6,48142129   | 0,089423683 |  |
| 228285_at    | TDRD9           | 3,837056482  | 3,747642277  | 0,089414205 |  |
| 213374_x_at  | HIBCH           | 4,273659132  | 4,18426834   | 0,089390792 |  |
| 203669_s_at  | DGAT1           | 2,600539826  | 2,511262629  | 0,089277196 |  |
| 215136_s_at  | EXOSC8          | 4,529358299  | 4,440114107  | 0,089244192 |  |
| 1554958_at   | ZNF641          | -0,59053611  | -0,679763839 | 0,089227729 |  |
| 202516_s_at  | DLG1            | -0,59053611  | -0,679763839 | 0,089227729 |  |
| 211403_x_at  | VCX2            | -0,59053611  | -0,679763839 | 0,089227729 |  |
| 214331_at    | TSFM            | -0,59053611  | -0,679763839 | 0,089227729 |  |
| 224194_at    | FCRL2           | -0,59053611  | -0,679763839 | 0,089227729 |  |
| 228376_at    | GGTA1P          | -0,59053611  | -0,679763839 | 0,089227729 |  |
| 229264_at    | -               | -0,59053611  | -0,679763839 | 0,089227729 |  |
| 233614_at    | -               | -0,59053611  | -0,679763839 | 0,089227729 |  |
| 235665_at    | PTOV1           | -0,59053611  | -0,679763839 | 0,089227729 |  |
| 239910_at    | PSG6            | -0,59053611  | -0,679763839 | 0,089227729 |  |
| 244332_at    | -               | -0,59053611  | -0,679763839 | 0,089227729 |  |
| 1555339_at   | RAP1A           | -1,131062212 | -1,220210588 | 0,089148375 |  |
| 1555425_x_at | SSH2            | -1,131062212 | -1,220210588 | 0,089148375 |  |
| 1559033_at   | LOC255167       | -1,131062212 | -1,220210588 | 0,089148375 |  |
| 1560117_at   | ABHD1           | -1,131062212 | -1,220210588 | 0,089148375 |  |

|             |                |              |              |             |  |
|-------------|----------------|--------------|--------------|-------------|--|
| 1562103_at  | -              | -1,131062212 | -1,220210588 | 0,089148375 |  |
| 211057_at   | ROR1           | -1,131062212 | -1,220210588 | 0,089148375 |  |
| 214342_at   | ATXN7L1        | -1,131062212 | -1,220210588 | 0,089148375 |  |
| 219090_at   | SLC24A3        | -1,131062212 | -1,220210588 | 0,089148375 |  |
| 220369_at   | SMEK1          | -1,131062212 | -1,220210588 | 0,089148375 |  |
| 221947_at   | -              | -1,131062212 | -1,220210588 | 0,089148375 |  |
| 223426_s_at | EPB41L4B       | -1,131062212 | -1,220210588 | 0,089148375 |  |
| 227614_at   | HKDC1          | -1,131062212 | -1,220210588 | 0,089148375 |  |
| 234004_at   | TTC28          | -1,131062212 | -1,220210588 | 0,089148375 |  |
| 241859_at   | PLCL1          | -1,131062212 | -1,220210588 | 0,089148375 |  |
| 244420_at   | -              | -1,131062212 | -1,220210588 | 0,089148375 |  |
| 218347_at   | TYW1 /// TYW1B | 2,562727117  | 2,473581079  | 0,089146038 |  |
| 225226_at   | FAM40A         | 2,791679321  | 2,702564916  | 0,089114406 |  |
| 223477_s_at | C12orf65       | 2,522021211  | 2,432926755  | 0,089094456 |  |
| 208906_at   | BSCL2 /// HNRN | 2,243430036  | 2,154405725  | 0,089024311 |  |
| 226576_at   | ARHGAP26       | 0,606430281  | 0,51742585   | 0,089004431 |  |
| 230670_at   | IGSF10         | 0,606430281  | 0,51742585   | 0,089004431 |  |
| 222614_at   | RWDD2B         | 1,021868205  | 0,932882274  | 0,088985931 |  |
| 231952_at   | -              | 1,021868205  | 0,932882274  | 0,088985931 |  |
| 200033_at   | DDX5           | 6,704180463  | 6,61521708   | 0,088963382 |  |
| 204546_at   | KIAA0513       | 0,760715727  | 0,67181667   | 0,088899057 |  |
| 234799_at   | ADARB1         | 0,760715727  | 0,67181667   | 0,088899057 |  |
| 237895_at   | -              | 0,760715727  | 0,67181667   | 0,088899057 |  |
| 223141_at   | UCK1           | 2,568189989  | 2,479296438  | 0,088893552 |  |
| 210442_at   | IL1RL1         | 0,246434561  | 0,157549243  | 0,088885318 |  |
| 212504_at   | DIP2C          | 0,246434561  | 0,157549243  | 0,088885318 |  |
| 238423_at   | SYTL3          | 0,246434561  | 0,157549243  | 0,088885318 |  |
| 205228_at   | RBMS2          | 0,44160593   | 0,352836757  | 0,088769173 |  |
| 217580_x_at | -              | 0,44160593   | 0,352836757  | 0,088769173 |  |
| 219227_at   | CCNJL          | 0,44160593   | 0,352836757  | 0,088769173 |  |
| 219699_at   | LGI2           | 0,44160593   | 0,352836757  | 0,088769173 |  |
| 229637_at   | RIC8B          | 0,44160593   | 0,352836757  | 0,088769173 |  |
| 233764_s_at | LARP1B         | 0,44160593   | 0,352836757  | 0,088769173 |  |
| 212636_at   | QKI            | 3,223057183  | 3,134292219  | 0,088764964 |  |
| 219373_at   | DPM3           | 3,170152481  | 3,081412119  | 0,088740361 |  |
| 209366_x_at | CYB5A          | 1,764611101  | 1,675891488  | 0,088719613 |  |
| 226952_at   | EAF1           | 3,325531666  | 3,236821511  | 0,088710155 |  |
| 214056_at   | MCL1           | 2,487840343  | 2,39915583   | 0,088684513 |  |
| 238865_at   | PABPC4L        | 4,171484821  | 4,082805739  | 0,088679082 |  |
| 227363_s_at | EMC8           | 4,663430187  | 4,574783153  | 0,088647034 |  |
| 204557_s_at | DZIP1          | 1,968405881  | 1,879785595  | 0,088620286 |  |
| 227576_at   | -              | 1,089278259  | 1,000684521  | 0,088593738 |  |
| 218309_at   | CAMK2N1        | -0,234278768 | -0,322870281 | 0,088591514 |  |
| 233440_at   | -              | -0,234278768 | -0,322870281 | 0,088591514 |  |
| 235257_at   | ODF3B          | -0,234278768 | -0,322870281 | 0,088591514 |  |
| 240537_s_at | LOC440356      | -0,234278768 | -0,322870281 | 0,088591514 |  |
| 243189_at   | NRF1           | -0,234278768 | -0,322870281 | 0,088591514 |  |
| 202686_s_at | AXL            | 4,576652364  | 4,488147962  | 0,088504402 |  |
| 203500_at   | GCDH           | 2,254767157  | 2,166264721  | 0,088502436 |  |
| 224640_at   | SPPL3          | 2,618203384  | 2,529740643  | 0,088462741 |  |
| 212170_at   | RBM12          | 2,402750389  | 2,314300277  | 0,088450112 |  |
| 210612_s_at | SYNJ2          | 2,094906514  | 2,006570641  | 0,088335873 |  |
| 213064_at   | ZC3H14         | 4,08075718   | 3,992437318  | 0,088319861 |  |
| 201393_s_at | IGF2R          | 3,680249569  | 3,591931093  | 0,088318475 |  |
| 224695_at   | C2orf29        | 3,406034785  | 3,317734938  | 0,088299847 |  |
| 214585_s_at | VPS52          | 3,474545391  | 3,386261038  | 0,088284353 |  |

|              |           |              |              |             |  |
|--------------|-----------|--------------|--------------|-------------|--|
| 1556457_s_at | FLJ39739  | -2,866296344 | -2,954576755 | 0,088280411 |  |
| 1560869_a_at | -         | -2,866296344 | -2,954576755 | 0,088280411 |  |
| 1570030_at   | ZNF396    | -2,866296344 | -2,954576755 | 0,088280411 |  |
| 208317_at    | XYLB      | -2,866296344 | -2,954576755 | 0,088280411 |  |
| 232445_at    | SYT9      | -2,866296344 | -2,954576755 | 0,088280411 |  |
| 237458_at    | -         | -2,866296344 | -2,954576755 | 0,088280411 |  |
| 242025_at    | -         | -2,866296344 | -2,954576755 | 0,088280411 |  |
| 244224_x_at  | LYNX1     | -2,866296344 | -2,954576755 | 0,088280411 |  |
| 207098_s_at  | MFN1      | 3,037284587  | 2,949006836  | 0,088277751 |  |
| 1552378_s_at | RDH10     | 1,037706275  | 0,949447784  | 0,088258491 |  |
| 213070_at    | PIK3C2A   | 2,497416546  | 2,409170778  | 0,088245768 |  |
| 203441_s_at  | CDH2      | 2,038300149  | 1,950068772  | 0,088231377 |  |
| 218356_at    | FTSJ2     | 3,62365843   | 3,535445117  | 0,088213313 |  |
| 53987_at     | RANBP10   | 1,311834425  | 1,223626587  | 0,088207837 |  |
| 212773_s_at  | TOMM20    | 4,385669548  | 4,297510916  | 0,088158632 |  |
| 213127_s_at  | MED8      | 2,314494121  | 2,226407528  | 0,088086593 |  |
| 209657_s_at  | HSF2      | 3,565667132  | 3,477609204  | 0,088057928 |  |
| 205700_at    | HSD17B6   | 0,779676066  | 0,691645685  | 0,08803038  |  |
| 209623_at    | MCCC2     | 4,743272317  | 4,655247494  | 0,088024824 |  |
| 223099_s_at  | LONP2     | 1,982112682  | 1,894118818  | 0,087993865 |  |
| 224364_s_at  | PPIL3     | 4,648465551  | 4,560475791  | 0,08798976  |  |
| 1554441_a_at | WAPAL     | 2,546213279  | 2,458228496  | 0,087984783 |  |
| 225004_at    | TMEM101   | 1,85379461   | 1,765933685  | 0,087860925 |  |
| 223697_x_at  | C9orf64   | 3,854300588  | 3,766462619  | 0,087837969 |  |
| 218161_s_at  | CLN6      | 1,549482847  | 1,461646549  | 0,087836298 |  |
| 224970_at    | NFIA      | 1,549482847  | 1,461646549  | 0,087836298 |  |
| 209971_x_at  | AIMP2     | 5,196752925  | 5,108917684  | 0,087835241 |  |
| 216945_x_at  | PASK      | 1,369290453  | 1,281471383  | 0,08781907  |  |
| 202779_s_at  | UBE2S     | 5,50848942   | 5,420747189  | 0,087742231 |  |
| 215460_x_at  | BRD1      | 1,923647937  | 1,835911187  | 0,087736751 |  |
| 209889_at    | SEC31B    | 0,46522187   | 0,377530647  | 0,087691223 |  |
| 1552978_a_at | SCAMP1    | 1,168140757  | 1,080561626  | 0,087579132 |  |
| 222793_at    | DDX58     | 1,168140757  | 1,080561626  | 0,087579132 |  |
| 212456_at    | KIAA0664  | 3,249366227  | 3,161800893  | 0,087565333 |  |
| 201361_at    | TMEM109   | 2,960432227  | 2,87289275   | 0,087539477 |  |
| 1559006_at   | -         | 1,556829052  | 1,469325098  | 0,087503954 |  |
| 1560349_at   | -         | -2,908843709 | -2,996335703 | 0,087491994 |  |
| 1561493_at   | -         | -2,908843709 | -2,996335703 | 0,087491994 |  |
| 1561857_at   | -         | -2,908843709 | -2,996335703 | 0,087491994 |  |
| 1563858_at   | -         | -2,908843709 | -2,996335703 | 0,087491994 |  |
| 1566253_at   | SH3GL1P1  | -2,908843709 | -2,996335703 | 0,087491994 |  |
| 1566952_at   | -         | -2,908843709 | -2,996335703 | 0,087491994 |  |
| 1569054_at   | SLC1A3    | -2,908843709 | -2,996335703 | 0,087491994 |  |
| 204530_s_at  | TOX       | -2,908843709 | -2,996335703 | 0,087491994 |  |
| 205466_s_at  | HS3ST1    | -2,908843709 | -2,996335703 | 0,087491994 |  |
| 215647_at    | -         | -2,908843709 | -2,996335703 | 0,087491994 |  |
| 220772_at    | BPESC1    | -2,908843709 | -2,996335703 | 0,087491994 |  |
| 222330_at    | -         | -2,908843709 | -2,996335703 | 0,087491994 |  |
| 226425_at    | CLIP4     | -2,908843709 | -2,996335703 | 0,087491994 |  |
| 227874_at    | EMCN      | -2,908843709 | -2,996335703 | 0,087491994 |  |
| 228863_at    | PCDH17    | -2,908843709 | -2,996335703 | 0,087491994 |  |
| 234325_at    | C2orf65   | -2,908843709 | -2,996335703 | 0,087491994 |  |
| 236773_at    | -         | -2,908843709 | -2,996335703 | 0,087491994 |  |
| 240472_at    | -         | -2,908843709 | -2,996335703 | 0,087491994 |  |
| 241761_at    | -         | -2,908843709 | -2,996335703 | 0,087491994 |  |
| 242313_at    | LOC728730 | -2,908843709 | -2,996335703 | 0,087491994 |  |



|              |                |              |              |             |  |
|--------------|----------------|--------------|--------------|-------------|--|
| 243307_at    | -              | -2,908843709 | -2,996335703 | 0,087491994 |  |
| 221570_s_at  | METTL5         | 5,453465706  | 5,366011631  | 0,087454075 |  |
| 202535_at    | FADD           | 2,640847372  | 2,553413592  | 0,08743378  |  |
| 218133_s_at  | NIF3L1         | 3,401961598  | 3,314541423  | 0,087420175 |  |
| 204341_at    | TRIM16         | 0,641402394  | 0,553993624  | 0,08740877  |  |
| 216711_s_at  | TAF1           | 0,641402394  | 0,553993624  | 0,08740877  |  |
| 219236_at    | PAQR6          | 0,641402394  | 0,553993624  | 0,08740877  |  |
| 222343_at    | BCL2L11        | 0,641402394  | 0,553993624  | 0,08740877  |  |
| 230792_at    | FAAH2          | 0,641402394  | 0,553993624  | 0,08740877  |  |
| 208369_s_at  | GCDH           | 1,995690482  | 1,908311039  | 0,087379443 |  |
| 242253_at    | LOC100506012   | 0,934330293  | 0,847075464  | 0,087254829 |  |
| 223198_x_at  | COMMD5         | 3,999522577  | 3,912315453  | 0,087207124 |  |
| 225181_at    | ARID1B         | 3,148435161  | 3,061230246  | 0,087204915 |  |
| 202129_s_at  | RIOK3          | 2,28383338   | 2,196649505  | 0,087183875 |  |
| 205891_at    | ADORA2B /// LO | 2,834621043  | 2,747463672  | 0,087157371 |  |
| 217456_x_at  | HLA-E          | 4,309979162  | 4,222822694  | 0,087156468 |  |
| 224569_s_at  | IRF2BP2        | 5,099184497  | 5,012029981  | 0,087154515 |  |
| 225616_at    | SPRYD4         | 1,177702228  | 1,090553537  | 0,08714869  |  |
| 204852_s_at  | PTPN7          | 2,003776245  | 1,916759838  | 0,087016407 |  |
| 228776_at    | GJC1           | 1,567778694  | 1,480766833  | 0,087011861 |  |
| 1557944_s_at | CTNND1 /// TMX | 0,480753764  | 0,393761504  | 0,086992259 |  |
| 207883_s_at  | TFR2           | 0,480753764  | 0,393761504  | 0,086992259 |  |
| 219417_s_at  | C17orf59       | 0,480753764  | 0,393761504  | 0,086992259 |  |
| 228994_at    | CCDC24         | 0,480753764  | 0,393761504  | 0,086992259 |  |
| 202073_at    | OPTN           | -0,196756757 | -0,283667828 | 0,08691107  |  |
| 211384_s_at  | CASR           | -0,196756757 | -0,283667828 | 0,08691107  |  |
| 230039_at    | -              | -0,196756757 | -0,283667828 | 0,08691107  |  |
| 239012_at    | RNF144B        | -0,196756757 | -0,283667828 | 0,08691107  |  |
| 239064_at    | -              | -0,196756757 | -0,283667828 | 0,08691107  |  |
| 212864_at    | CDS2           | 2,768138014  | 2,681234383  | 0,086903631 |  |
| 227568_at    | HECTD2         | 1,390002893  | 1,303116084  | 0,086886809 |  |
| 238316_at    | ZNF567         | 0,291166226  | 0,204310755  | 0,08685547  |  |
| 202047_s_at  | CBX6           | 2,654607516  | 2,567790814  | 0,086816703 |  |
| 212556_at    | SCRIB          | 4,171484821  | 4,084681583  | 0,086803238 |  |
| 208924_at    | RNF11          | 4,085209408  | 3,9984201    | 0,086789308 |  |
| 222468_at    | KIAA0319L      | 1,485482016  | 1,398700978  | 0,086781037 |  |
| 211434_s_at  | CCRL2          | 1,575032557  | 1,488344553  | 0,086688004 |  |
| 202057_at    | KPNA1          | 1,073999308  | 0,987376598  | 0,086622711 |  |
| 244411_at    | LOC100507316   | 1,659347917  | 1,572742379  | 0,086605538 |  |
| 203564_at    | FANCG          | 1,883312263  | 1,796776588  | 0,086535676 |  |
| 226089_at    | RABL3          | 1,951783949  | 1,865308541  | 0,086475407 |  |
| 218515_at    | GCFC1          | 4,493918448  | 4,407512498  | 0,08640595  |  |
| 200052_s_at  | ILF2           | 5,770427329  | 5,684038418  | 0,086388911 |  |
| 211136_s_at  | CLPTM1         | 3,049053496  | 2,962671751  | 0,086381745 |  |
| 222526_at    | GATAD2A        | 3,302773593  | 3,216434104  | 0,086339489 |  |
| 61874_at     | CACFD1         | 2,354035736  | 2,267724404  | 0,086311332 |  |
| 203302_at    | DCK            | 4,004232272  | 3,917937882  | 0,086294389 |  |
| 1558647_at   | SH3D19         | -1,026571149 | -1,112851844 | 0,086280695 |  |
| 1564138_at   | FBXW12         | -1,026571149 | -1,112851844 | 0,086280695 |  |
| 207715_at    | CRYGB          | -1,026571149 | -1,112851844 | 0,086280695 |  |
| 210348_at    | 38231          | -1,026571149 | -1,112851844 | 0,086280695 |  |
| 213592_at    | APLNR          | -1,026571149 | -1,112851844 | 0,086280695 |  |
| 217475_s_at  | LIMK2          | -1,026571149 | -1,112851844 | 0,086280695 |  |
| 222084_s_at  | SBF1           | -1,026571149 | -1,112851844 | 0,086280695 |  |
| 227498_at    | SOX6           | -1,026571149 | -1,112851844 | 0,086280695 |  |
| 227956_at    | ITPRIPL2       | -1,026571149 | -1,112851844 | 0,086280695 |  |

|              |                 |              |              |             |  |
|--------------|-----------------|--------------|--------------|-------------|--|
| 230279_at    | LOC100507540    | -1,026571149 | -1,112851844 | 0,086280695 |  |
| 242995_at    | -               | -1,026571149 | -1,112851844 | 0,086280695 |  |
| 202085_at    | TJP2            | 4,082030648  | 3,995764148  | 0,086266499 |  |
| 218414_s_at  | NDE1            | 2,022468633  | 1,936283387  | 0,086185246 |  |
| 229570_at    | -               | 0,822971223  | 0,73688026   | 0,086090963 |  |
| 238651_at    | -               | 0,822971223  | 0,73688026   | 0,086090963 |  |
| 1557120_at   | EEF1A1          | 0,30867765   | 0,222599095  | 0,086078555 |  |
| 220819_at    | FRMD1           | 0,30867765   | 0,222599095  | 0,086078555 |  |
| 236924_at    | -               | 0,30867765   | 0,222599095  | 0,086078555 |  |
| 239498_at    | -               | 0,30867765   | 0,222599095  | 0,086078555 |  |
| 208909_at    | UQCRFS1         | 7,614028608  | 7,527961716  | 0,086066892 |  |
| 204009_s_at  | KRAS            | 3,651373876  | 3,565308644  | 0,086065232 |  |
| 227034_at    | SOWAHC          | 3,310399576  | 3,22439681   | 0,086002766 |  |
| 1563030_at   | -               | 0,503742507  | 0,417770464  | 0,085972044 |  |
| 221577_x_at  | GDF15           | 0,503742507  | 0,417770464  | 0,085972044 |  |
| 1570266_x_at | ERVH-1          | 1,751865623  | 1,665902186  | 0,085963437 |  |
| 204258_at    | CHD1            | 3,3865839    | 3,300620584  | 0,085963316 |  |
| 1565817_at   | IKZF1           | 0,67554678   | 0,589657387  | 0,085889393 |  |
| 212735_at    | KIAA0226        | 0,67554678   | 0,589657387  | 0,085889393 |  |
| 224728_at    | ATPAF1          | 1,67631007   | 1,590454215  | 0,085855855 |  |
| 1554078_s_at | DNAJA3          | 4,076291169  | 3,990437532  | 0,085853637 |  |
| 201705_at    | PSMD7           | 4,43733059   | 4,351483879  | 0,085846711 |  |
| 1555021_a_at | SCARF1          | -0,172274514 | -0,258114234 | 0,08583972  |  |
| 1563802_at   | LOC284551       | -0,172274514 | -0,258114234 | 0,08583972  |  |
| 222107_x_at  | LZTS1           | -0,172274514 | -0,258114234 | 0,08583972  |  |
| 230785_at    | -               | -0,172274514 | -0,258114234 | 0,08583972  |  |
| 238143_at    | LOC646627       | -0,172274514 | -0,258114234 | 0,08583972  |  |
| 221952_x_at  | TRMT5           | 6,535143884  | 6,449325479  | 0,085818405 |  |
| 1553910_at   | NBPF4           | 1,829737795  | 1,743944487  | 0,085793308 |  |
| 212436_at    | TRIM33          | 2,208874124  | 2,123108223  | 0,085765901 |  |
| 203614_at    | UTP14C          | 3,919150955  | 3,833443169  | 0,085707786 |  |
| 209695_at    | PTP4A3          | 2,680059304  | 2,594367918  | 0,085691387 |  |
| 228379_at    | LOC128322 /// N | 2,035673598  | 1,950068772  | 0,085604826 |  |
| 227060_at    | RELT            | 1,683039483  | 1,59747851   | 0,085560973 |  |
| 200054_at    | ZNF259          | 3,600740871  | 3,515187047  | 0,085553824 |  |
| 210968_s_at  | RTN4            | 5,528477288  | 5,442974965  | 0,085502323 |  |
| 238154_at    | CEP70           | 1,215326747  | 1,129843209  | 0,085483538 |  |
| 204742_s_at  | PDS5B           | 1,422536444  | 1,337086025  | 0,085450419 |  |
| 220072_at    | CSPP1           | 1,603688695  | 1,518263577  | 0,085425117 |  |
| 215847_at    | HERC2P3         | 0,518867317  | 0,433557298  | 0,085310019 |  |
| 201211_s_at  | DDX3X           | 3,191547726  | 3,106248809  | 0,085298917 |  |
| 202138_x_at  | AIMP2           | 5,027297124  | 4,942014748  | 0,085282376 |  |
| 226223_at    | PAWR            | 2,427005622  | 2,341749893  | 0,085255729 |  |
| 212072_s_at  | CSNK2A1 /// CSN | 5,308953409  | 5,223738367  | 0,085215042 |  |
| 1555120_at   | CD96            | -3,013665402 | -3,098858316 | 0,085192914 |  |
| 1556583_a_at | SLC8A1          | -3,013665402 | -3,098858316 | 0,085192914 |  |
| 1556904_at   | -               | -3,013665402 | -3,098858316 | 0,085192914 |  |
| 1557631_at   | -               | -3,013665402 | -3,098858316 | 0,085192914 |  |
| 1560424_at   | -               | -3,013665402 | -3,098858316 | 0,085192914 |  |
| 1561707_at   | LOC150185       | -3,013665402 | -3,098858316 | 0,085192914 |  |
| 1563519_at   | -               | -3,013665402 | -3,098858316 | 0,085192914 |  |
| 1564965_at   | -               | -3,013665402 | -3,098858316 | 0,085192914 |  |
| 1565693_at   | DTYMK           | -3,013665402 | -3,098858316 | 0,085192914 |  |
| 204938_s_at  | PLN             | -3,013665402 | -3,098858316 | 0,085192914 |  |
| 217394_at    | -               | -3,013665402 | -3,098858316 | 0,085192914 |  |
| 224126_at    | SLC10A7         | -3,013665402 | -3,098858316 | 0,085192914 |  |

|              |         |              |              |             |  |
|--------------|---------|--------------|--------------|-------------|--|
| 233102_at    | -       | -3,013665402 | -3,098858316 | 0,085192914 |  |
| 233499_at    | LRRC7   | -3,013665402 | -3,098858316 | 0,085192914 |  |
| 242549_at    | PRKD3   | -3,013665402 | -3,098858316 | 0,085192914 |  |
| 244288_s_at  | -       | -3,013665402 | -3,098858316 | 0,085192914 |  |
| 244560_at    | -       | -3,013665402 | -3,098858316 | 0,085192914 |  |
| 214710_s_at  | CCNB1   | 5,335891383  | 5,250722366  | 0,085169017 |  |
| 208751_at    | NAPA    | 1,844820248  | 1,759685182  | 0,085135066 |  |
| 201378_s_at  | UBAP2L  | 3,225364068  | 3,140317145  | 0,085046923 |  |
| 210554_s_at  | CTBP2   | 3,408067074  | 3,323041804  | 0,08502527  |  |
| 220181_x_at  | SLC30A5 | 2,227406889  | 2,14244844   | 0,084958449 |  |
| 232593_at    | NEURL3  | 0,334552598  | 0,249604176  | 0,084948422 |  |
| 205446_s_at  | ATF2    | 1,850809354  | 1,765933685  | 0,08487567  |  |
| 203821_at    | HBEGF   | 1,114389003  | 1,029536893  | 0,08485211  |  |
| 213207_s_at  | GOSR2   | 1,114389003  | 1,029536893  | 0,08485211  |  |
| 219888_at    | SPAG4   | 1,114389003  | 1,029536893  | 0,08485211  |  |
| 226093_at    | DCP1B   | 1,114389003  | 1,029536893  | 0,08485211  |  |
| 204151_x_at  | AKR1C1  | 5,151980116  | 5,06714968   | 0,084830436 |  |
| 214773_x_at  | TIPRL   | 2,922548342  | 2,837730973  | 0,084817369 |  |
| 209061_at    | NCOA3   | 2,338135744  | 2,253342112  | 0,084793631 |  |
| 225597_at    | SLC45A4 | 2,338135744  | 2,253342112  | 0,084793631 |  |
| 221897_at    | TRIM52  | 0,853119696  | 0,768343791  | 0,084775905 |  |
| 204977_at    | DDX10   | 4,131454119  | 4,046693299  | 0,08476082  |  |
| 215383_x_at  | SPG21   | 1,621313976  | 1,536652708  | 0,084661269 |  |
| 52731_at     | AMBRA1  | 1,892051064  | 1,80741769   | 0,084633374 |  |
| 209651_at    | TGFB1I1 | 1,534677255  | 1,450051551  | 0,084625704 |  |
| 201771_at    | SCAMP3  | 3,76356289   | 3,678940066  | 0,084622823 |  |
| 200720_s_at  | ACTR1A  | 3,927675977  | 3,843079586  | 0,084596391 |  |
| 217094_s_at  | ITCH    | 2,623460554  | 2,538891651  | 0,084568903 |  |
| 226143_at    | RAI1    | 2,666540916  | 2,582026171  | 0,084514745 |  |
| 222582_at    | PRKAG2  | 1,238353345  | 1,153866761  | 0,084486584 |  |
| 207809_s_at  | ATP6AP1 | 3,562021138  | 3,477609204  | 0,084411934 |  |
| 230733_at    | -       | 1,709647566  | 1,6252386    | 0,084408965 |  |
| 1552480_s_at | PTPRC   | -3,054236653 | -3,138626879 | 0,084390226 |  |
| 1555572_at   | CA6     | -3,054236653 | -3,138626879 | 0,084390226 |  |
| 1559606_at   | GBP6    | -3,054236653 | -3,138626879 | 0,084390226 |  |
| 1560990_a_at | -       | -3,054236653 | -3,138626879 | 0,084390226 |  |
| 205501_at    | PDE10A  | -3,054236653 | -3,138626879 | 0,084390226 |  |
| 207256_at    | MBL2    | -3,054236653 | -3,138626879 | 0,084390226 |  |
| 207272_at    | ZNF80   | -3,054236653 | -3,138626879 | 0,084390226 |  |
| 214981_at    | POSTN   | -3,054236653 | -3,138626879 | 0,084390226 |  |
| 216435_at    | MAP2K5  | -3,054236653 | -3,138626879 | 0,084390226 |  |
| 217147_s_at  | TRAT1   | -3,054236653 | -3,138626879 | 0,084390226 |  |
| 221805_at    | NEFL    | -3,054236653 | -3,138626879 | 0,084390226 |  |
| 227702_at    | CYP4X1  | -3,054236653 | -3,138626879 | 0,084390226 |  |
| 237530_at    | -       | -3,054236653 | -3,138626879 | 0,084390226 |  |
| 241635_at    | -       | -3,054236653 | -3,138626879 | 0,084390226 |  |
| 242791_at    | FBXO3   | -3,054236653 | -3,138626879 | 0,084390226 |  |
| 243159_x_at  | -       | -3,054236653 | -3,138626879 | 0,084390226 |  |
| 210231_x_at  | SET     | 6,212860491  | 6,128482074  | 0,084378417 |  |
| 205756_s_at  | F8      | 0,541261317  | 0,456918297  | 0,084343019 |  |
| 210291_s_at  | ZNF174  | 0,541261317  | 0,456918297  | 0,084343019 |  |
| 212557_at    | ZNF451  | 3,899061119  | 3,814728712  | 0,084332407 |  |
| 206612_at    | CACNG1  | -0,136301282 | -0,220592223 | 0,084290941 |  |
| 209488_s_at  | RBPMS   | -0,136301282 | -0,220592223 | 0,084290941 |  |
| 223607_x_at  | ZSWIM1  | 2,752227654  | 2,667949403  | 0,084278251 |  |
| 212115_at    | HN1L    | 4,791165053  | 4,706906619  | 0,084258434 |  |

|              |                 |              |              |             |  |
|--------------|-----------------|--------------|--------------|-------------|--|
| 225793_at    | LIX1L           | 3,401961598  | 3,317734938  | 0,08422666  |  |
| 212967_x_at  | NAP1L1          | 6,230624919  | 6,146404405  | 0,084220514 |  |
| 202665_s_at  | WIPF1           | 0,351548291  | 0,26733076   | 0,084217531 |  |
| 208742_s_at  | SAP18           | 6,395776901  | 6,311619003  | 0,084157898 |  |
| 204004_at    | PAWR            | 1,716223609  | 1,632095957  | 0,084127652 |  |
| 208802_at    | SRP72           | 4,190500971  | 4,106388091  | 0,08411288  |  |
| 235615_at    | PGGT1B          | 2,59162628   | 2,507538456  | 0,084087824 |  |
| 202593_s_at  | GDE1            | 3,132544588  | 3,048471686  | 0,084072902 |  |
| 1552633_at   | ZNF101          | 0,87091093   | 0,786897721  | 0,084013209 |  |
| 204893_s_at  | ZFYVE9          | 0,87091093   | 0,786897721  | 0,084013209 |  |
| 1554768_a_at | MAD2L1          | 5,149552753  | 5,065567526  | 0,083985228 |  |
| 226108_at    | ZC3H18          | 2,250242994  | 2,166264721  | 0,083978273 |  |
| 203378_at    | PCF11           | 2,456762221  | 2,372786857  | 0,083975363 |  |
| 1558201_s_at | SLC4A1AP        | 2,87191078   | 2,787940144  | 0,083970636 |  |
| 228220_at    | FCHO2           | 2,194816625  | 2,110887591  | 0,083929034 |  |
| 226583_at    | C12orf76        | 2,014487247  | 1,930732138  | 0,083755109 |  |
| 229182_at    | MIR4723 /// TME | 1,462198073  | 1,378453643  | 0,08374443  |  |
| 202556_s_at  | MCRS1           | 2,646022818  | 2,562416132  | 0,083606686 |  |
| 201594_s_at  | PPP4R1          | 5,547270277  | 5,463664675  | 0,083605603 |  |
| 223465_at    | COL4A3BP        | 1,261018186  | 1,177496821  | 0,083521365 |  |
| 203445_s_at  | CTDSP2          | 3,467741468  | 3,384231608  | 0,08350986  |  |
| 202444_s_at  | ERLIN1          | 1,732533761  | 1,64909809   | 0,083435671 |  |
| 222561_at    | LANCL2          | 1,732533761  | 1,64909809   | 0,083435671 |  |
| 201444_s_at  | ATP6AP2         | 5,277617766  | 5,194214288  | 0,083403478 |  |
| 213798_s_at  | CAP1            | 6,023694176  | 5,940328216  | 0,083365961 |  |
| 223277_at    | C3orf75         | 3,236843482  | 3,153484076  | 0,083359407 |  |
| 220046_s_at  | CCNL1           | 3,868391882  | 3,785040604  | 0,083351278 |  |
| 1560457_x_at | PLIN5           | -0,926850548 | -1,010192375 | 0,083341827 |  |
| 205438_at    | PTPN21          | -0,926850548 | -1,010192375 | 0,083341827 |  |
| 206266_at    | GPLD1           | -0,926850548 | -1,010192375 | 0,083341827 |  |
| 215590_x_at  | ACVR2B-AS1      | -0,926850548 | -1,010192375 | 0,083341827 |  |
| 220568_at    | -               | -0,926850548 | -1,010192375 | 0,083341827 |  |
| 228957_at    | ZNF362          | -0,926850548 | -1,010192375 | 0,083341827 |  |
| 237735_at    | LOC100506907    | -0,926850548 | -1,010192375 | 0,083341827 |  |
| 242497_at    | TRAFD1          | -0,926850548 | -1,010192375 | 0,083341827 |  |
| 243583_at    | -               | -0,926850548 | -1,010192375 | 0,083341827 |  |
| 217010_s_at  | CDC25C          | -0,112808516 | -0,19610998  | 0,083301464 |  |
| 220089_at    | L2HGDH          | -0,112808516 | -0,19610998  | 0,083301464 |  |
| 230386_at    | -               | -0,112808516 | -0,19610998  | 0,083301464 |  |
| 237892_at    | -               | -0,112808516 | -0,19610998  | 0,083301464 |  |
| 243763_x_at  | -               | -0,112808516 | -0,19610998  | 0,083301464 |  |
| 1566079_at   | RPS16P5         | 0,888485433  | 0,805216064  | 0,083269369 |  |
| 220052_s_at  | TINF2           | 0,888485433  | 0,805216064  | 0,083269369 |  |
| 212348_s_at  | KDM1A           | 3,815015946  | 3,731768909  | 0,083247038 |  |
| 225849_s_at  | SFT2D1          | 5,557377128  | 5,474197485  | 0,083179643 |  |
| 210290_at    | ZNF174          | 0,376672223  | 0,293518836  | 0,083153388 |  |
| 236269_at    | ZNF628          | 0,376672223  | 0,293518836  | 0,083153388 |  |
| 208864_s_at  | TXN             | 6,443496441  | 6,360373874  | 0,083122567 |  |
| 225017_at    | CCDC14          | 3,962664437  | 3,879554231  | 0,083110206 |  |
| 200708_at    | GOT2            | 4,78999665   | 4,706906619  | 0,08309003  |  |
| 212757_s_at  | CAMK2G          | 2,272723257  | 2,189694216  | 0,083029041 |  |
| 205687_at    | UBFD1           | 3,158127685  | 3,075135559  | 0,082992127 |  |
| 217909_s_at  | MLX             | 2,931053371  | 2,848075314  | 0,082978057 |  |
| 1554486_a_at | GFOD1           | 3,000043914  | 2,917077481  | 0,082966434 |  |
| 203265_s_at  | MAP2K4          | 1,481627361  | 1,398700978  | 0,082926383 |  |
| 234032_at    | -               | 1,481627361  | 1,398700978  | 0,082926383 |  |

|              |                 |              |              |             |  |
|--------------|-----------------|--------------|--------------|-------------|--|
| 202329_at    | CSK             | 3,598072957  | 3,515187047  | 0,08288591  |  |
| 222858_s_at  | DAPP1           | 0,57782909   | 0,495031851  | 0,08279724  |  |
| 213367_at    | LOC155060       | 0,900083947  | 0,817300337  | 0,08278361  |  |
| 244774_at    | PHACTR2         | 0,900083947  | 0,817300337  | 0,08278361  |  |
| 221221_s_at  | KLHL3           | 1,163336153  | 1,080561626  | 0,082774528 |  |
| 208997_s_at  | UCP2            | 1,748661581  | 1,665902186  | 0,082759396 |  |
| 1557067_s_at | LUC7L           | 2,485917452  | 2,403170156  | 0,082747296 |  |
| 214086_s_at  | PARP2           | 3,461883885  | 3,379145507  | 0,082738378 |  |
| 217457_s_at  | RAP1GDS1        | 2,938102794  | 2,855418981  | 0,082683814 |  |
| 224768_at    | IWS1            | 3,903389697  | 3,820743792  | 0,082645905 |  |
| 217496_s_at  | IDE             | 3,105247586  | 3,022611001  | 0,082636585 |  |
| 212898_at    | TTI1            | 3,363729238  | 3,281121096  | 0,082608142 |  |
| 1554053_at   | SPTLC1          | 1,283332461  | 1,200746069  | 0,082586391 |  |
| 216551_x_at  | PLCG1           | 1,283332461  | 1,200746069  | 0,082586391 |  |
| 239035_at    | MTHFR           | 1,283332461  | 1,200746069  | 0,082586391 |  |
| 46323_at     | CANT1           | 3,32445605   | 3,241873662  | 0,082582388 |  |
| 216835_s_at  | DOK1            | 2,28383338   | 2,201267805  | 0,082565575 |  |
| 233268_s_at  | CHURC1          | 4,441801334  | 4,359253484  | 0,08254785  |  |
| 213876_x_at  | ZRSR2           | 1,976645579  | 1,894118818  | 0,082526761 |  |
| 226684_at    | ATG2B           | 3,010782559  | 2,928263672  | 0,082518887 |  |
| 222499_at    | LOC100652993 /  | 2,491678455  | 2,409170778  | 0,082507677 |  |
| 203020_at    | RABGAP1L        | 3,366867184  | 3,284389368  | 0,082477816 |  |
| 228323_at    | CASC5           | 3,540875956  | 3,458446747  | 0,082429209 |  |
| 200714_x_at  | OS9             | 3,717599787  | 3,635238397  | 0,08236139  |  |
| 219336_s_at  | ASCC1           | 2,396622324  | 2,314300277  | 0,082322046 |  |
| 225677_at    | BCAP29          | 2,048758794  | 1,966439221  | 0,082319573 |  |
| 238005_s_at  | SIN3A           | 1,982112682  | 1,899812471  | 0,082300211 |  |
| 200655_s_at  | CALM1 /// CALM  | 6,349600574  | 6,267365756  | 0,082234818 |  |
| 217912_at    | DUS1L           | 3,399920684  | 3,317734938  | 0,082185746 |  |
| 225741_at    | THUMPD3         | 2,236584753  | 2,154405725  | 0,082179027 |  |
| 230777_s_at  | PRDM15          | 2,915422315  | 2,833274877  | 0,082147438 |  |
| 204089_x_at  | MAP3K4          | 3,117719377  | 3,035599287  | 0,082120089 |  |
| 1555364_at   | C11orf58        | -3,15396682  | -3,236070201 | 0,082103381 |  |
| 1560800_at   | -               | -3,15396682  | -3,236070201 | 0,082103381 |  |
| 1565915_at   | -               | -3,15396682  | -3,236070201 | 0,082103381 |  |
| 216697_at    | TRIO            | -3,15396682  | -3,236070201 | 0,082103381 |  |
| 217505_at    | KLHL23 /// PHOS | -3,15396682  | -3,236070201 | 0,082103381 |  |
| 229057_at    | SCN2A           | -3,15396682  | -3,236070201 | 0,082103381 |  |
| 241098_at    | CLEC7A          | -3,15396682  | -3,236070201 | 0,082103381 |  |
| 243390_at    | -               | -3,15396682  | -3,236070201 | 0,082103381 |  |
| 235837_at    | SNIP1           | 0,917308734  | 0,835239052  | 0,082069682 |  |
| 226049_at    | ERC1            | 1,767779954  | 1,685812099  | 0,081967854 |  |
| 216194_s_at  | TBCB            | 5,752744279  | 5,670779353  | 0,081964926 |  |
| 204747_at    | IFIT3           | 3,866915053  | 3,785040604  | 0,081874449 |  |
| 206539_s_at  | CYP4F12         | -0,078265071 | -0,160136748 | 0,081871677 |  |
| 208851_s_at  | THY1            | -0,078265071 | -0,160136748 | 0,081871677 |  |
| 215649_s_at  | MVK             | -0,078265071 | -0,160136748 | 0,081871677 |  |
| 228845_at    | PLBD2           | -0,078265071 | -0,160136748 | 0,081871677 |  |
| 244145_at    | -               | -0,078265071 | -0,160136748 | 0,081871677 |  |
| 218553_s_at  | KCTD15          | 2,185368281  | 2,103505212  | 0,081863068 |  |
| 222839_s_at  | PAPOLG          | 2,55541096   | 2,473581079  | 0,081829881 |  |
| 209210_s_at  | FERMT2          | 4,69955433   | 4,617737065  | 0,081817265 |  |
| 202019_s_at  | LANCL1          | 1,689737652  | 1,60795124   | 0,081786412 |  |
| 202433_at    | SLC35B1         | 3,711030028  | 3,629253073  | 0,081776955 |  |
| 202216_x_at  | NFYC            | 2,127340679  | 2,045615873  | 0,081724806 |  |
| 244881_at    | LMLN            | 1,305306849  | 1,223626587  | 0,081680262 |  |

|              |                |              |              |             |  |
|--------------|----------------|--------------|--------------|-------------|--|
| 235926_at    | ANAPC5         | 2,64946283   | 2,567790814  | 0,081672016 |  |
| 244803_at    | -              | 0,928678725  | 0,847075464  | 0,081603261 |  |
| 47083_at     | C7orf26        | 3,207388477  | 3,125814827  | 0,081573649 |  |
| 208107_s_at  | LOC81691       | 2,779171778  | 2,697670403  | 0,081501375 |  |
| 226335_at    | RPS6KA3        | 4,480461153  | 4,398994417  | 0,081466736 |  |
| 229267_at    | ANAPC1 /// LOC | 3,133773173  | 3,052311115  | 0,081462058 |  |
| 1553105_s_at | DSG2           | 0,417596971  | 0,336136178  | 0,081460793 |  |
| 205209_at    | ACVR1B         | 0,417596971  | 0,336136178  | 0,081460793 |  |
| 211087_x_at  | MAPK14         | 0,417596971  | 0,336136178  | 0,081460793 |  |
| 208737_at    | ATP6V1G1       | 5,468393796  | 5,386939953  | 0,081453844 |  |
| 219297_at    | WDR44          | 3,565667132  | 3,484256382  | 0,08141075  |  |
| 226120_at    | TTC8           | 3,821129803  | 3,739727424  | 0,081402379 |  |
| 1560694_at   | SFT2D1         | 0,613492853  | 0,532164371  | 0,081328483 |  |
| 220000_at    | SIGLEC5        | 0,613492853  | 0,532164371  | 0,081328483 |  |
| 222650_s_at  | SLC2A4RG       | 0,613492853  | 0,532164371  | 0,081328483 |  |
| 234254_at    | -              | 0,613492853  | 0,532164371  | 0,081328483 |  |
| 241993_x_at  | -              | 1,783520648  | 1,702196344  | 0,081324304 |  |
| 1557762_at   | -              | -3,192553003 | -3,273861381 | 0,081308379 |  |
| 1561939_at   | DYNC2H1        | -3,192553003 | -3,273861381 | 0,081308379 |  |
| 1565563_at   | -              | -3,192553003 | -3,273861381 | 0,081308379 |  |
| 207276_at    | CDR1           | -3,192553003 | -3,273861381 | 0,081308379 |  |
| 207750_at    | -              | -3,192553003 | -3,273861381 | 0,081308379 |  |
| 215514_at    | -              | -3,192553003 | -3,273861381 | 0,081308379 |  |
| 204269_at    | PIM2           | 2,701760055  | 2,620464265  | 0,08129579  |  |
| 212418_at    | ELF1           | 4,794664596  | 4,713387424  | 0,081277172 |  |
| 217941_s_at  | ERBB2IP        | 4,091545995  | 4,010311743  | 0,081234252 |  |
| 202829_s_at  | VAMP7          | 4,649324867  | 4,56809424   | 0,081230627 |  |
| 208771_s_at  | LTA4H          | 4,522808608  | 4,441578636  | 0,081229972 |  |
| 225551_at    | CNST           | 1,523472489  | 1,442269454  | 0,081203035 |  |
| 229558_at    | C16orf88       | 1,523472489  | 1,442269454  | 0,081203035 |  |
| 243492_at    | THEM4          | 1,523472489  | 1,442269454  | 0,081203035 |  |
| 209782_s_at  | DBP            | 1,318332599  | 1,23718272   | 0,081149879 |  |
| 200074_s_at  | RPL14          | 6,976903525  | 6,895812729  | 0,081090796 |  |
| 219312_s_at  | ZBTB10         | 1,789769151  | 1,708698295  | 0,081070856 |  |
| 227858_at    | PCNXL3         | 1,789769151  | 1,708698295  | 0,081070856 |  |
| 221699_s_at  | DDX50          | 4,278110569  | 4,197041937  | 0,081068633 |  |
| 34449_at     | CASP2          | 1,97938172   | 1,898391163  | 0,080990558 |  |
| 1566775_at   | DNAH1          | -0,055687482 | -0,136643983 | 0,080956501 |  |
| 205589_at    | MYL3           | -0,055687482 | -0,136643983 | 0,080956501 |  |
| 216646_at    | DSCC1          | -0,055687482 | -0,136643983 | 0,080956501 |  |
| 224069_x_at  | P2RX2          | -0,055687482 | -0,136643983 | 0,080956501 |  |
| 231306_at    | LYZL4          | -0,055687482 | -0,136643983 | 0,080956501 |  |
| 231372_at    | SLC25A48       | -0,055687482 | -0,136643983 | 0,080956501 |  |
| 244795_at    | UQCC           | -0,055687482 | -0,136643983 | 0,080956501 |  |
| 228167_at    | KLHL6          | 2,208874124  | 2,127967638  | 0,080906486 |  |
| 218106_s_at  | MRPS10         | 4,282548314  | 4,201658983  | 0,080889331 |  |
| 1554937_x_at | EXOC3L1        | 0,209623097  | 0,128747141  | 0,080875957 |  |
| 229443_at    | MNF1           | 0,209623097  | 0,128747141  | 0,080875957 |  |
| 230146_s_at  | NCS1           | 0,209623097  | 0,128747141  | 0,080875957 |  |
| 218199_s_at  | NOL6           | 1,62481334   | 1,543943227  | 0,080870113 |  |
| 227805_at    | METAP1D        | 1,62481334   | 1,543943227  | 0,080870113 |  |
| 229846_s_at  | MAPKAP1        | 2,794789337  | 2,713921281  | 0,080868056 |  |
| 205004_at    | NKRF           | 3,148435161  | 3,067567462  | 0,080867699 |  |
| 1559226_x_at | LCE1E          | 1,210676994  | 1,129843209  | 0,080833785 |  |
| 225560_at    | POMT2          | 1,326951551  | 1,246149888  | 0,080801662 |  |
| 204172_at    | CPOX           | 4,771961618  | 4,691191826  | 0,080769791 |  |

|              |                  |             |              |             |  |
|--------------|------------------|-------------|--------------|-------------|--|
| 208925_at    | CLDND1           | 3,27186005  | 3,191118448  | 0,080741602 |  |
| 219079_at    | CYB5R4           | 3,27186005  | 3,191118448  | 0,080741602 |  |
| 203042_at    | LAMP2            | 3,48613512  | 3,405399563  | 0,080735557 |  |
| 221547_at    | PRPF18           | 3,120200849 | 3,039473081  | 0,080727768 |  |
| 222512_at    | NUB1             | 3,152077493 | 3,071356473  | 0,08072102  |  |
| 204521_at    | FAM216A          | 4,301804532 | 4,221118236  | 0,080686296 |  |
| 219342_at    | CASD1            | 2,630440446 | 2,549796788  | 0,080643658 |  |
| 210980_s_at  | ASAH1            | 4,718102071 | 4,637466396  | 0,080635675 |  |
| 201799_s_at  | OSBP             | 2,879254447 | 2,798646381  | 0,080608066 |  |
| 202451_at    | GTF2H1           | 3,801937331 | 3,721356767  | 0,080580564 |  |
| 226177_at    | GLTP             | 3,540875956 | 3,460374487  | 0,080501469 |  |
| 1554167_a_at | GOLGA7           | 4,764049426 | 4,683579237  | 0,080470189 |  |
| 206829_x_at  | ZNF430           | 2,493593689 | 2,413157372  | 0,080436317 |  |
| 233849_s_at  | ARHGAP5          | 3,159334685 | 3,078904771  | 0,080429914 |  |
| 1553815_a_at | TCEANC           | -0,83191556 | -0,912331589 | 0,080416029 |  |
| 1558299_at   | -                | -0,83191556 | -0,912331589 | 0,080416029 |  |
| 209270_at    | LAMB3            | -0,83191556 | -0,912331589 | 0,080416029 |  |
| 213259_s_at  | SARM1            | -0,83191556 | -0,912331589 | 0,080416029 |  |
| 224323_s_at  | MRO              | -0,83191556 | -0,912331589 | 0,080416029 |  |
| 225013_at    | LZTS2            | -0,83191556 | -0,912331589 | 0,080416029 |  |
| 234076_at    | -                | -0,83191556 | -0,912331589 | 0,080416029 |  |
| 234225_at    | -                | -0,83191556 | -0,912331589 | 0,080416029 |  |
| 239109_at    | -                | -0,83191556 | -0,912331589 | 0,080416029 |  |
| 212717_at    | PLEKHM1          | 2,544366685 | 2,464004877  | 0,080361808 |  |
| 211536_x_at  | MAP3K7           | 3,161745659 | 3,081412119  | 0,08033354  |  |
| 49111_at     | ARRB1            | 1,448440187 | 1,36822241   | 0,080217777 |  |
| 213668_s_at  | SOX4             | 1,64218396  | 1,562009954  | 0,080174006 |  |
| 203374_s_at  | TPP2             | 3,771477743 | 3,691304166  | 0,080173577 |  |
| 200790_at    | ODC1             | 6,689947949 | 6,609799427  | 0,080148522 |  |
| 226747_at    | TXNDC16          | 4,955812888 | 4,875668581  | 0,080144307 |  |
| 209377_s_at  | HMG3             | 6,728271603 | 6,648148518  | 0,080123085 |  |
| 212861_at    | MFSD5            | 2,503131904 | 2,423075926  | 0,080055978 |  |
| 225267_at    | KPNA4            | 4,169090081 | 4,08904909   | 0,08004099  |  |
| 33646_g_at   | GM2A             | 1,855284924 | 1,775255987  | 0,080028937 |  |
| 201047_x_at  | RAB6A            | 4,875469339 | 4,795472925  | 0,079996413 |  |
| 202560_s_at  | CHTOP            | 4,415271934 | 4,335292864  | 0,079979071 |  |
| 217408_at    | MRPS18B          | 4,755694657 | 4,675718863  | 0,079975793 |  |
| 209784_s_at  | JAG2             | 0,648296226 | 0,568365095  | 0,07993113  |  |
| 208837_at    | TMED3            | 4,124054951 | 4,044124824  | 0,079930127 |  |
| 235940_at    | C9orf64          | 3,692807389 | 3,6128809    | 0,07992649  |  |
| 201896_s_at  | PSRC1            | 1,233777334 | 1,153866761  | 0,079910572 |  |
| 200097_s_at  | HNRNP35 /// MIR3 | 5,456414609 | 5,376513741  | 0,079900869 |  |
| 204467_s_at  | SNCA             | 2,456762221 | 2,376875125  | 0,079887096 |  |
| 219549_s_at  | RTN3             | 4,234684448 | 4,154809816  | 0,079874632 |  |
| 204270_at    | SKI              | 0,457392764 | 0,377530647  | 0,079862118 |  |
| 1553510_s_at | RQCD1            | 3,294008537 | 3,21415095   | 0,079857587 |  |
| 228822_s_at  | USP16            | 3,917011805 | 3,837157105  | 0,0798547   |  |
| 211530_x_at  | HLA-G            | 4,779830653 | 4,699988715  | 0,079841938 |  |
| 214756_x_at  | PMS2P1           | 3,008105382 | 2,928263672  | 0,079841711 |  |
| 205017_s_at  | MBNL2            | 0,97328325  | 0,893473268  | 0,079809982 |  |
| 1556646_at   | -                | 1,973904239 | 1,894118818  | 0,079785421 |  |
| 202649_x_at  | RPS19            | 7,834905002 | 7,755140714  | 0,079764289 |  |
| 235061_at    | PPM1K            | 1,823660386 | 1,743944487  | 0,079715899 |  |
| 225187_at    | KIAA1967         | 3,046446467 | 2,966746113  | 0,079700354 |  |
| 227598_at    | C7orf29          | 3,046446467 | 2,966746113  | 0,079700354 |  |
| 205877_s_at  | ZC3H7B           | 2,178241192 | 2,098562556  | 0,079678635 |  |

|              |                 |              |              |             |  |
|--------------|-----------------|--------------|--------------|-------------|--|
| 201195_s_at  | SLC7A5          | 4,082030648  | 4,002394882  | 0,079635766 |  |
| 220977_x_at  | EPB41L5         | -0,022466681 | -0,102100538 | 0,079633857 |  |
| 222339_x_at  | -               | -0,022466681 | -0,102100538 | 0,079633857 |  |
| 222655_s_at  | IMPAD1          | -0,022466681 | -0,102100538 | 0,079633857 |  |
| 224342_x_at  | LOC96610        | -0,022466681 | -0,102100538 | 0,079633857 |  |
| 243615_at    | -               | -0,022466681 | -0,102100538 | 0,079633857 |  |
| 212640_at    | PTPLB           | 3,681090166  | 3,601570866  | 0,0795193   |  |
| 215926_x_at  | SNAPC4          | 2,35929703   | 2,27978304   | 0,07951399  |  |
| 213477_x_at  | EEF1A1 /// LOC1 | 8,21190393   | 8,132404793  | 0,079499137 |  |
| 229189_s_at  | LOC100507376    | 1,119359127  | 1,039887232  | 0,079471896 |  |
| 202074_s_at  | OPTN            | 1,360921491  | 1,281471383  | 0,079450108 |  |
| 228880_at    | NAT8L           | 1,567778694  | 1,488344553  | 0,079434141 |  |
| 1568718_at   | SLC22A23        | 0,984222186  | 0,904843258  | 0,079378927 |  |
| 212086_x_at  | LMNA            | 3,021441862  | 2,942125533  | 0,079316328 |  |
| 219924_s_at  | ZMYM6           | 2,522021211  | 2,442710777  | 0,079310434 |  |
| 226466_s_at  | FAM58A /// FAM5 | 2,752227654  | 2,672945617  | 0,079282036 |  |
| 204031_s_at  | PCBP2           | 5,71034645   | 5,631110922  | 0,079235528 |  |
| 214080_x_at  | PRKCSH          | 3,755604375  | 3,67645448   | 0,079149895 |  |
| 203062_s_at  | MDC1            | 3,50144467   | 3,42231092   | 0,07913375  |  |
| 201214_s_at  | PPP1R7          | 3,575646363  | 3,496520471  | 0,079125892 |  |
| 201686_x_at  | API5            | 2,369762403  | 2,290658654  | 0,079103748 |  |
| 1553943_at   | NS3BP           | 0,255492549  | 0,176436073  | 0,079056476 |  |
| 205026_at    | STAT5B          | 0,255492549  | 0,176436073  | 0,079056476 |  |
| 205326_at    | RAMP3           | 0,255492549  | 0,176436073  | 0,079056476 |  |
| 210144_at    | TBC1D22A        | 0,255492549  | 0,176436073  | 0,079056476 |  |
| 214367_at    | RASGRP2         | 0,255492549  | 0,176436073  | 0,079056476 |  |
| 215153_at    | NOS1AP          | 0,255492549  | 0,176436073  | 0,079056476 |  |
| 212162_at    | KIDINS220       | 2,064305961  | 1,98530622   | 0,078999741 |  |
| 204313_s_at  | CREB1           | 2,760204767  | 2,681234383  | 0,078970383 |  |
| 238650_x_at  | WDR89           | 2,31665944   | 2,237691445  | 0,078967994 |  |
| 209214_s_at  | EWSR1           | 4,519052534  | 4,440114107  | 0,078938427 |  |
| 205162_at    | ERCC8           | 2,482063962  | 2,403170156  | 0,078893806 |  |
| 1557965_at   | MTERFD2         | 2,721505869  | 2,64270545   | 0,078800419 |  |
| 225725_at    | ZMAT3           | 2,320980353  | 2,242180416  | 0,078799937 |  |
| 209711_at    | SLC35D1         | 1,764611101  | 1,685812099  | 0,078799001 |  |
| 218542_at    | CEP55           | 3,069741844  | 2,990953566  | 0,078788278 |  |
| 207582_at    | PIN1P1          | -0,00073712  | -0,079522948 | 0,078785828 |  |
| 209122_at    | LOC100509484 /  | 5,070280549  | 4,991513183  | 0,078767367 |  |
| 213726_x_at  | TUBB4B          | 5,869070493  | 5,790352889  | 0,078717604 |  |
| 211475_s_at  | BAG1            | 3,512821151  | 3,434130109  | 0,078691042 |  |
| 221226_s_at  | ASIC4           | 1,381753566  | 1,303116084  | 0,078637482 |  |
| 1555181_a_at | ST3GAL3         | 2,382221458  | 2,303602088  | 0,07861937  |  |
| 200627_at    | LOC100506732 /  | 6,795992082  | 6,717390829  | 0,078601253 |  |
| 1556320_at   | STOML1          | 0,682279745  | 0,603679647  | 0,078600099 |  |
| 210001_s_at  | SOCS1           | 0,682279745  | 0,603679647  | 0,078600099 |  |
| 213238_at    | ATP10D          | 0,682279745  | 0,603679647  | 0,078600099 |  |
| 203537_at    | PRPSAP2         | 3,852809256  | 3,77423254   | 0,078576716 |  |
| 222414_at    | MLL3            | 2,206540699  | 2,127967638  | 0,078573061 |  |
| 211755_s_at  | ATP5F1          | 6,882856958  | 6,804291857  | 0,078565101 |  |
| 218099_at    | TEX2            | 2,854131948  | 2,775606361  | 0,078525588 |  |
| 215948_x_at  | ZMYM5           | 1,143956113  | 1,065442793  | 0,07851332  |  |
| 206067_s_at  | WT1             | 3,517535002  | 3,439026336  | 0,078508666 |  |
| 213941_x_at  | RPS7            | 7,725433715  | 7,646997217  | 0,078436498 |  |
| 240114_s_at  | TMEM174         | 1,079110292  | 1,000684521  | 0,078425771 |  |
| 222113_s_at  | EPS15L1         | 2,331726354  | 2,253342112  | 0,078384242 |  |
| 207196_s_at  | TNIP1           | 2,59519831   | 2,516830926  | 0,078367384 |  |



|              |                |              |              |             |  |
|--------------|----------------|--------------|--------------|-------------|--|
| 239729_at    | -              | 0,496120222  | 0,417770464  | 0,078349758 |  |
| 228449_at    | MORC2-AS1      | 1,011212064  | 0,932882274  | 0,07832979  |  |
| 234241_at    | SCAMP5         | 1,011212064  | 0,932882274  | 0,07832979  |  |
| 238609_at    | FAM200A        | 1,011212064  | 0,932882274  | 0,07832979  |  |
| 208961_s_at  | KLF6           | 1,596577845  | 1,518263577  | 0,078314268 |  |
| 1555382_at   | POF1B          | -3,32387526  | -3,402185466 | 0,078310206 |  |
| 1557079_at   | ITGBL1         | -3,32387526  | -3,402185466 | 0,078310206 |  |
| 233875_at    | -              | -3,32387526  | -3,402185466 | 0,078310206 |  |
| 203665_at    | HMOX1          | 1,859746653  | 1,781437557  | 0,078309096 |  |
| 1555743_s_at | ERVH-6         | 2,497416546  | 2,419116683  | 0,078299862 |  |
| 205063_at    | GEMIN2         | 3,548266005  | 3,469974737  | 0,078291269 |  |
| 209256_s_at  | KLHDC10        | 2,861566439  | 2,783327323  | 0,078239116 |  |
| 207700_s_at  | NCOA3          | 2,338135744  | 2,259997914  | 0,07813783  |  |
| 200827_at    | PLOD1          | 2,90394695   | 2,825817328  | 0,078129621 |  |
| 212132_at    | LSM14A         | 6,043930105  | 5,965827644  | 0,078102461 |  |
| 1556329_a_at | -              | 1,603688695  | 1,525647381  | 0,078041314 |  |
| 219100_at    | OBFC1          | 2,156646206  | 2,078620836  | 0,07802537  |  |
| 200828_s_at  | ZNF207         | 5,938908435  | 5,860917599  | 0,077990837 |  |
| 220967_s_at  | ZNF696         | 2,022468633  | 1,944570415  | 0,077898218 |  |
| 201453_x_at  | RHEB           | 6,375277638  | 6,297400219  | 0,077877419 |  |
| 226277_at    | COL4A3BP       | 2,745814053  | 2,667949403  | 0,07786465  |  |
| 217728_at    | S100A6         | 3,316904202  | 3,239069096  | 0,077835106 |  |
| 236613_at    | RBM25          | 0,702292136  | 0,624460759  | 0,077831377 |  |
| 34697_at     | LRP6           | -0,690806998 | -0,768633105 | 0,077826107 |  |
| 217816_s_at  | PCNP           | 5,145904033  | 5,068098141  | 0,077805893 |  |
| 200717_x_at  | RPL7           | 8,150902865  | 8,073169078  | 0,077733787 |  |
| 214195_at    | TPP1           | 1,027166904  | 0,949447784  | 0,077719121 |  |
| 232134_at    | -              | 1,027166904  | 0,949447784  | 0,077719121 |  |
| 235174_s_at  | LOC100128822   | 2,876321464  | 2,798646381  | 0,077675084 |  |
| 215130_s_at  | IQCK           | 1,292162421  | 1,214517879  | 0,077644542 |  |
| 200937_s_at  | RPL5 /// SNORD | 7,277456502  | 7,199827195  | 0,077629307 |  |
| 1560656_at   | -              | -0,741668563 | -0,819238336 | 0,077569773 |  |
| 1570186_at   | GRASPOS        | -0,741668563 | -0,819238336 | 0,077569773 |  |
| 204733_at    | KLK6           | -0,741668563 | -0,819238336 | 0,077569773 |  |
| 206049_at    | SELP           | -0,741668563 | -0,819238336 | 0,077569773 |  |
| 206487_at    | SUN1           | -0,741668563 | -0,819238336 | 0,077569773 |  |
| 210982_s_at  | HLA-DRA        | -0,741668563 | -0,819238336 | 0,077569773 |  |
| 215527_at    | KHDRBS2        | -0,741668563 | -0,819238336 | 0,077569773 |  |
| 220508_at    | CCT8L2         | -0,741668563 | -0,819238336 | 0,077569773 |  |
| 233939_at    | REXO1          | -0,741668563 | -0,819238336 | 0,077569773 |  |
| 237447_at    | C22orf45       | -0,741668563 | -0,819238336 | 0,077569773 |  |
| 243956_at    | SUSD3          | -0,741668563 | -0,819238336 | 0,077569773 |  |
| 244085_at    | ZNF653         | -0,741668563 | -0,819238336 | 0,077569773 |  |
| 244516_at    | -              | -0,741668563 | -0,819238336 | 0,077569773 |  |
| 222110_at    | SENP5          | 0,03125738   | -0,046302147 | 0,077559527 |  |
| 226978_at    | PPARA          | 0,03125738   | -0,046302147 | 0,077559527 |  |
| 244561_at    | SLC9A1         | 0,03125738   | -0,046302147 | 0,077559527 |  |
| 224474_x_at  | SMEK2          | 2,102456302  | 2,024923328  | 0,077532974 |  |
| 225030_at    | BOD1           | 2,840652551  | 2,763166224  | 0,077486326 |  |
| 220350_at    | ZNF235         | 0,882651021  | 0,805216064  | 0,077434957 |  |
| 209759_s_at  | ECI1           | 2,520143371  | 2,442710777  | 0,077432594 |  |
| 201810_s_at  | SH3BP5         | 1,414471577  | 1,337086025  | 0,077385552 |  |
| 206507_at    | ZSCAN12        | 1,414471577  | 1,337086025  | 0,077385552 |  |
| 212585_at    | OSBPL8         | 4,769592513  | 4,692217481  | 0,077375033 |  |
| 1555216_a_at | LOC645722      | 1,621313976  | 1,543943227  | 0,077370749 |  |
| 203098_at    | CDYL           | 3,884538004  | 3,807174423  | 0,077363581 |  |

|              |                 |             |              |             |  |
|--------------|-----------------|-------------|--------------|-------------|--|
| 218403_at    | TRIAP1          | 4,714822074 | 4,637466396  | 0,077355679 |  |
| 219720_s_at  | C14orf118       | 0,715481152 | 0,638150376  | 0,077330775 |  |
| 228356_at    | ANKRD11         | 0,715481152 | 0,638150376  | 0,077330775 |  |
| 239376_at    | -               | 0,715481152 | 0,638150376  | 0,077330775 |  |
| 209325_s_at  | RGS16           | 1,037706275 | 0,960386719  | 0,077319556 |  |
| 221010_s_at  | SIRT5           | 1,037706275 | 0,960386719  | 0,077319556 |  |
| 226439_s_at  | NBEA            | 1,037706275 | 0,960386719  | 0,077319556 |  |
| 213881_x_at  | SUMO2           | 7,001339637 | 6,924026094  | 0,077313542 |  |
| 200091_s_at  | RPS25           | 7,282034778 | 7,204722872  | 0,077311906 |  |
| 202011_at    | TJP1            | 4,242108456 | 4,164893351  | 0,077215106 |  |
| 212284_x_at  | TPT1            | 8,106030794 | 8,028836191  | 0,077194603 |  |
| 209394_at    | ASMTL           | 1,889144008 | 1,811954245  | 0,077189763 |  |
| 203848_at    | AKAP8           | 2,626954721 | 2,549796788  | 0,077157933 |  |
| 56197_at     | C17orf61-PLSCR  | 3,435226406 | 3,358102979  | 0,077123427 |  |
| 218147_s_at  | GLT8D1          | 3,046446467 | 2,969455976  | 0,076990491 |  |
| 222668_at    | KCTD15          | 4,010933848 | 3,933981372  | 0,076952476 |  |
| 203557_s_at  | PCBD1           | 0,533835206 | 0,456918297  | 0,076916909 |  |
| 211112_at    | SLC12A4         | 0,533835206 | 0,456918297  | 0,076916909 |  |
| 225325_at    | MFSD6           | 0,533835206 | 0,456918297  | 0,076916909 |  |
| 226396_at    | TEN1 /// TEN1-C | 0,533835206 | 0,456918297  | 0,076916909 |  |
| 212260_at    | GIGYF2          | 1,897847661 | 1,820984782  | 0,076862879 |  |
| 208158_s_at  | OSBPL1A         | 1,314003737 | 1,23718272   | 0,076821017 |  |
| 222057_at    | NOL12           | 0,052199481 | -0,024572586 | 0,076772067 |  |
| 230590_at    | -               | 0,052199481 | -0,024572586 | 0,076772067 |  |
| 235431_s_at  | PELI3           | 0,052199481 | -0,024572586 | 0,076772067 |  |
| 243272_at    | -               | 0,052199481 | -0,024572586 | 0,076772067 |  |
| 204278_s_at  | EBAG9           | 3,563845287 | 3,487095824  | 0,076749463 |  |
| 227413_at    | UBLCP1          | 3,223057183 | 3,146317015  | 0,076740169 |  |
| 238026_at    | RPL35A          | 1,191926657 | 1,115234684  | 0,076691972 |  |
| 208617_s_at  | PTP4A2          | 5,892666962 | 5,815986205  | 0,076680757 |  |
| 218802_at    | CCDC109B        | 2,732900676 | 2,656223838  | 0,076676837 |  |
| 204769_s_at  | TAP2            | 1,820612054 | 1,743944487  | 0,076667566 |  |
| 222017_x_at  | LRCH4           | 0,735041319 | 0,658444279  | 0,07659704  |  |
| 207079_s_at  | MED6            | 4,569406661 | 4,492864546  | 0,076542116 |  |
| 1555797_a_at | ARPC5           | 4,00557508  | 3,92911743   | 0,07645765  |  |
| 220305_at    | MAVS            | 2,596981013 | 2,520531219  | 0,076449794 |  |
| 209432_s_at  | CREB3           | 2,693452197 | 2,617011906  | 0,076440291 |  |
| 212923_s_at  | PXDC1           | 0,911589958 | 0,835239052  | 0,076350906 |  |
| 242141_at    | HDAC2           | 0,911589958 | 0,835239052  | 0,076350906 |  |
| 235997_at    | ZNF74           | 1,063722698 | 0,987376598  | 0,0763461   |  |
| 225230_at    | DRAM2           | 2,266015882 | 2,189694216  | 0,076321666 |  |
| 226740_x_at  | LOC100506032 /  | 5,454818035 | 5,378554049  | 0,076263986 |  |
| 209795_at    | CD69            | 4,102254727 | 4,026016313  | 0,076238414 |  |
| 224572_s_at  | IRF2BP2         | 2,790121796 | 2,713921281  | 0,076200515 |  |
| 213534_s_at  | PASK            | 1,446464021 | 1,370274469  | 0,076189551 |  |
| 237209_s_at  | NFRKB           | 0,747935635 | 0,67181667   | 0,076118965 |  |
| 202170_s_at  | AASDHPPT        | 3,877221251 | 3,801102381  | 0,07611887  |  |
| 201165_s_at  | PUM1            | 4,223764788 | 4,147649355  | 0,076115433 |  |
| 220189_s_at  | MGAT4B          | 3,24026957  | 3,164168347  | 0,076101223 |  |
| 1552535_at   | CLDN19          | 0,555999837 | 0,479907041  | 0,076092796 |  |
| 223006_s_at  | TMEM245         | 3,606946883 | 3,530865925  | 0,076080958 |  |
| 215728_s_at  | ACOT7           | 1,655931423 | 1,579853228  | 0,076078195 |  |
| 212199_at    | MRFAP1L1        | 4,160677048 | 4,084681583  | 0,075995465 |  |
| 223007_s_at  | TMEM245         | 3,425226911 | 3,349287209  | 0,075939703 |  |
| 223394_at    | SERTAD1         | 3,076146581 | 3,000258961  | 0,075887621 |  |
| 218156_s_at  | TSR1            | 4,076291169 | 4,00040886   | 0,075882309 |  |

|              |                 |              |              |             |  |
|--------------|-----------------|--------------|--------------|-------------|--|
| 211998_at    | H3F3A /// H3F3B | 2,146943689  | 2,071071048  | 0,075872641 |  |
| 222907_x_at  | TMEM50B         | 2,614687931  | 2,538891651  | 0,07579628  |  |
| 224934_at    | YIPF5           | 4,387215694  | 4,311461649  | 0,075754045 |  |
| 214683_s_at  | CLK1            | 2,802535172  | 2,726791458  | 0,075743714 |  |
| 207419_s_at  | RAC2            | 3,251631457  | 3,175947691  | 0,075683766 |  |
| 201128_s_at  | ACLY            | 5,5868312    | 5,511165886  | 0,075665314 |  |
| 225045_at    | CCDC88A         | 2,082235068  | 2,006570641  | 0,075664427 |  |
| 206737_at    | WNT11           | 0,083054335  | 0,007421914  | 0,075632421 |  |
| 226694_at    | AKAP2 /// PALM2 | 0,083054335  | 0,007421914  | 0,075632421 |  |
| 227168_at    | MIAT            | 0,083054335  | 0,007421914  | 0,075632421 |  |
| 230234_at    | FXN             | 0,083054335  | 0,007421914  | 0,075632421 |  |
| 225010_at    | CCDC6           | 3,805796305  | 3,730171924  | 0,075624382 |  |
| 225783_at    | UBE2F           | 3,91129185   | 3,835672678  | 0,075619172 |  |
| 231892_at    | C9orf100        | 0,57058931   | 0,495031851  | 0,07555746  |  |
| 220311_at    | N6AMT1          | 1,348276312  | 1,272721751  | 0,075554561 |  |
| 223142_s_at  | UCK1            | 1,348276312  | 1,272721751  | 0,075554561 |  |
| 228046_at    | ZNF827          | 1,348276312  | 1,272721751  | 0,075554561 |  |
| 209234_at    | KIF1B           | 2,288253583  | 2,212749286  | 0,075504296 |  |
| 211759_x_at  | TBCB            | 6,250723505  | 6,17529995   | 0,075423555 |  |
| 223684_s_at  | SMUG1           | 2,410880861  | 2,335461563  | 0,075419297 |  |
| 217346_at    | -               | 1,089278259  | 1,013870809  | 0,07540745  |  |
| 220200_s_at  | SETD8           | 1,089278259  | 1,013870809  | 0,07540745  |  |
| 224883_at    | PLDN            | 2,896728217  | 2,821324225  | 0,075403992 |  |
| 200969_at    | SERP1           | 4,650183672  | 4,574783153  | 0,075400519 |  |
| 222931_s_at  | THNSL1          | 2,675004741  | 2,599625088  | 0,075379654 |  |
| 212955_s_at  | POLR2I          | 5,710758133  | 5,635383188  | 0,075374944 |  |
| 200728_at    | ACTR2           | 5,429404826  | 5,35413705   | 0,075267776 |  |
| 222789_at    | RSBN1           | 2,678376417  | 2,603119255  | 0,075257162 |  |
| 209344_at    | TPM4            | 2,726400382  | 2,651169275  | 0,075231107 |  |
| 1555656_at   | CD300LG         | 2,094906514  | 2,019703483  | 0,075203031 |  |
| 205658_s_at  | SNAPC4          | 1,473887017  | 1,398700978  | 0,075186039 |  |
| 209475_at    | USP15           | 3,021441862  | 2,946258252  | 0,075183609 |  |
| 217786_at    | PRMT5           | 5,131216168  | 5,056037987  | 0,075178182 |  |
| 233750_s_at  | TRMT1L          | 2,166283906  | 2,091116676  | 0,07516723  |  |
| 220258_s_at  | WRAP53          | 1,683039483  | 1,60795124   | 0,075088243 |  |
| 336_at       | TBXA2R          | -0,430183988 | -0,505249144 | 0,075065156 |  |
| 1556395_at   | -               | 6,195242402  | 6,120275227  | 0,074967175 |  |
| 1557814_a_at | -               | 0,779676066  | 0,704715219  | 0,074960847 |  |
| 236241_at    | MED31           | 0,779676066  | 0,704715219  | 0,074960847 |  |
| 236721_at    | ALKBH1          | 0,779676066  | 0,704715219  | 0,074960847 |  |
| 204892_x_at  | EEF1A1 /// LOC1 | 8,441689547  | 8,36673719   | 0,074952356 |  |
| 218443_s_at  | DAZAP1          | 3,480351894  | 3,405399563  | 0,07495233  |  |
| 213359_at    | HNRNPD          | 2,173470163  | 2,098562556  | 0,074907607 |  |
| 202756_s_at  | GPC1            | 0,103263601  | 0,028364014  | 0,074899587 |  |
| 207184_at    | SLC6A13         | 0,103263601  | 0,028364014  | 0,074899587 |  |
| 210499_s_at  | PQBP1           | 0,103263601  | 0,028364014  | 0,074899587 |  |
| 213641_at    | ZNF500          | 0,103263601  | 0,028364014  | 0,074899587 |  |
| 240897_at    | -               | 0,103263601  | 0,028364014  | 0,074899587 |  |
| 234797_at    | -               | 1,104397092  | 1,029536893  | 0,074860199 |  |
| 1553592_x_at | BCRP3           | -0,655928373 | -0,730778808 | 0,074850435 |  |
| 1554367_at   | CALHM1          | -0,655928373 | -0,730778808 | 0,074850435 |  |
| 1554487_a_at | ATF6B           | -0,655928373 | -0,730778808 | 0,074850435 |  |
| 1558938_at   | -               | -0,655928373 | -0,730778808 | 0,074850435 |  |
| 1569386_at   | -               | -0,655928373 | -0,730778808 | 0,074850435 |  |
| 205487_s_at  | VGLL1           | -0,655928373 | -0,730778808 | 0,074850435 |  |
| 208003_s_at  | NFAT5           | -0,655928373 | -0,730778808 | 0,074850435 |  |

|             |                 |              |              |             |  |
|-------------|-----------------|--------------|--------------|-------------|--|
| 215484_at   | -               | -0,655928373 | -0,730778808 | 0,074850435 |  |
| 222238_s_at | POLM            | -0,655928373 | -0,730778808 | 0,074850435 |  |
| 222711_s_at | RHBDF1          | -0,655928373 | -0,730778808 | 0,074850435 |  |
| 237096_at   | -               | -0,655928373 | -0,730778808 | 0,074850435 |  |
| 222902_s_at | DEM1            | 1,689737652  | 1,614891062  | 0,07484659  |  |
| 203073_at   | COG2            | 2,912562019  | 2,837730973  | 0,074831046 |  |
| 209115_at   | UBA3            | 3,891817836  | 3,816987307  | 0,074830529 |  |
| 204728_s_at | WDHD1           | 2,59162628   | 2,516830926  | 0,074795355 |  |
| 226017_at   | CMTM7           | 3,142344098  | 3,067567462  | 0,074776636 |  |
| 225592_at   | NRM             | 2,691784869  | 2,617011906  | 0,074772963 |  |
| 228928_x_at | BANP            | 3,072307152  | 2,997606395  | 0,074700757 |  |
| 223027_at   | SNX9            | 3,146001821  | 3,071356473  | 0,074645348 |  |
| 213583_x_at | EEF1A1 /// LOC1 | 8,244967699  | 8,170383416  | 0,074584284 |  |
| 201426_s_at | VIM             | 7,213675956  | 7,139143803  | 0,074532153 |  |
| 37950_at    | PREP            | 2,723955201  | 2,649480478  | 0,074474723 |  |
| 200670_at   | XBP1            | 3,002736078  | 2,928263672  | 0,074472407 |  |
| 209388_at   | PAPOLA          | 4,877670934  | 4,803278451  | 0,074392483 |  |
| 202243_s_at | PSMB4           | 6,134169759  | 6,059813854  | 0,074355906 |  |
| 220746_s_at | UIMC1           | 2,382221458  | 2,307890888  | 0,074330569 |  |
| 242082_at   | MMAB            | 0,798390451  | 0,724100169  | 0,074290282 |  |
| 215778_x_at | HAB1            | 0,606430281  | 0,532164371  | 0,074265911 |  |
| 226616_s_at | NDUFV3          | 5,450757238  | 5,376513741  | 0,074243498 |  |
| 1552766_at  | HS6ST2          | 0,384950573  | 0,310717132  | 0,074233441 |  |
| 206956_at   | BGLAP /// PMF1- | 0,384950573  | 0,310717132  | 0,074233441 |  |
| 209588_at   | EPHB2           | 0,384950573  | 0,310717132  | 0,074233441 |  |
| 212965_at   | HIC2            | 0,384950573  | 0,310717132  | 0,074233441 |  |
| 242657_at   | -               | 0,384950573  | 0,310717132  | 0,074233441 |  |
| 242697_at   | ZNF540          | 0,384950573  | 0,310717132  | 0,074233441 |  |
| 226006_at   | PET100          | 4,671066265  | 4,59685817   | 0,074208095 |  |
| 201832_s_at | USO1            | 4,416281951  | 4,34210478   | 0,074177171 |  |
| 205872_x_at | PDE4DIP         | 2,609398637  | 2,53523821   | 0,074160427 |  |
| 228987_at   | FAM49B          | 2,446911392  | 2,372786857  | 0,074124535 |  |
| 212569_at   | SMCHD1          | 3,388643755  | 3,314541423  | 0,074102332 |  |
| 211252_x_at | PTCRA           | 1,504602299  | 1,43051703   | 0,074085269 |  |
| 214651_s_at | HOXA10-HOXA9    | 1,390002893  | 1,315948728  | 0,074054165 |  |
| 219402_s_at | DERL1           | 4,945355432  | 4,871328311  | 0,074027121 |  |
| 221931_s_at | SEH1L           | 5,520750144  | 5,446747817  | 0,074002327 |  |
| 209585_s_at | MINPP1          | 5,191452978  | 5,117494652  | 0,073958326 |  |
| 212409_s_at | TOR1AIP1        | 2,132266459  | 2,058399602  | 0,073866858 |  |
| 214787_at   | DENND4A         | 0,810733188  | 0,73688026   | 0,073852927 |  |
| 229370_at   | -               | 0,810733188  | 0,73688026   | 0,073852927 |  |
| 211279_at   | NRF1            | 0,133056859  | 0,059218869  | 0,07383799  |  |
| 225453_x_at | CCDC124         | 0,133056859  | 0,059218869  | 0,07383799  |  |
| 236660_at   | -               | 0,133056859  | 0,059218869  | 0,07383799  |  |
| 210285_x_at | WTAP            | 3,568395593  | 3,49464046   | 0,073755133 |  |
| 33736_at    | STOML1          | 0,273440755  | 0,199702333  | 0,073738422 |  |
| 226963_at   | BTF3L4          | 4,779830653  | 4,706094468  | 0,073736185 |  |
| 201429_s_at | RPL37A          | 8,269522091  | 8,195791132  | 0,073730959 |  |
| 225729_at   | C6orf89         | 1,274448124  | 1,200746069  | 0,073702055 |  |
| 232171_x_at | KLHDC4          | 1,515954005  | 1,442269454  | 0,073684551 |  |
| 222759_at   | SUV420H1        | 3,207971844  | 3,134292219  | 0,073679625 |  |
| 202529_at   | PRPSAP1         | 2,623460554  | 2,549796788  | 0,073663766 |  |
| 226666_at   | DAAM1           | 3,598072957  | 3,524430539  | 0,073642418 |  |
| 207060_at   | EN2             | 1,139070151  | 1,065442793  | 0,073627358 |  |
| 217526_at   | NFATC2IP        | 2,861566439  | 2,787940144  | 0,073626295 |  |
| 221700_s_at | UBA52           | 7,466364266  | 7,392798805  | 0,073565461 |  |

|              |                   |              |              |             |  |
|--------------|-------------------|--------------|--------------|-------------|--|
| 204119_s_at  | ADK               | 4,574391988  | 4,500847519  | 0,07354447  |  |
| 204552_at    | INPP4A            | 0,627515113  | 0,553993624  | 0,073521489 |  |
| 227219_x_at  | MAP1LC3A          | 0,627515113  | 0,553993624  | 0,073521489 |  |
| 231831_at    | COX19             | 0,627515113  | 0,553993624  | 0,073521489 |  |
| 213194_at    | ROBO1             | 1,90937145   | 1,835911187  | 0,073460263 |  |
| 221230_s_at  | ARID4B            | 3,377277984  | 3,303845028  | 0,073432956 |  |
| 1553037_a_at | SYN2              | -1,964176657 | -2,037551727 | 0,07337507  |  |
| 1554032_at   | ARSB              | -1,964176657 | -2,037551727 | 0,07337507  |  |
| 1554655_a_at | RPRML             | -1,964176657 | -2,037551727 | 0,07337507  |  |
| 1554908_at   | HYDIN             | -1,964176657 | -2,037551727 | 0,07337507  |  |
| 1556262_at   | PWRN1             | -1,964176657 | -2,037551727 | 0,07337507  |  |
| 1558247_s_at | NTN5              | -1,964176657 | -2,037551727 | 0,07337507  |  |
| 1561454_at   | -                 | -1,964176657 | -2,037551727 | 0,07337507  |  |
| 1562562_at   | ANKUB1            | -1,964176657 | -2,037551727 | 0,07337507  |  |
| 1563034_at   | GPD1              | -1,964176657 | -2,037551727 | 0,07337507  |  |
| 205675_at    | MTTP              | -1,964176657 | -2,037551727 | 0,07337507  |  |
| 207433_at    | IL10              | -1,964176657 | -2,037551727 | 0,07337507  |  |
| 213683_at    | ACSL6 /// LOC10   | -1,964176657 | -2,037551727 | 0,07337507  |  |
| 213929_at    | EXPH5             | -1,964176657 | -2,037551727 | 0,07337507  |  |
| 215795_at    | MYH7B             | -1,964176657 | -2,037551727 | 0,07337507  |  |
| 216514_at    | -                 | -1,964176657 | -2,037551727 | 0,07337507  |  |
| 216922_x_at  | DAZ1 /// DAZ2 /// | -1,964176657 | -2,037551727 | 0,07337507  |  |
| 222177_s_at  | SCAND2            | -1,964176657 | -2,037551727 | 0,07337507  |  |
| 223484_at    | C15orf48          | -1,964176657 | -2,037551727 | 0,07337507  |  |
| 223529_at    | SYT4              | -1,964176657 | -2,037551727 | 0,07337507  |  |
| 223710_at    | CCL26             | -1,964176657 | -2,037551727 | 0,07337507  |  |
| 224192_at    | FCRL2             | -1,964176657 | -2,037551727 | 0,07337507  |  |
| 227440_at    | ANKS1B            | -1,964176657 | -2,037551727 | 0,07337507  |  |
| 233288_at    | ATR               | -1,964176657 | -2,037551727 | 0,07337507  |  |
| 233330_s_at  | -                 | -1,964176657 | -2,037551727 | 0,07337507  |  |
| 238058_at    | LOC150381         | -1,964176657 | -2,037551727 | 0,07337507  |  |
| 238060_s_at  | B4GALNT4          | -1,964176657 | -2,037551727 | 0,07337507  |  |
| 244784_at    | DHX57             | -1,964176657 | -2,037551727 | 0,07337507  |  |
| 222715_s_at  | SYNRG             | 0,995078803  | 0,921731975  | 0,073346827 |  |
| 213564_x_at  | LDHB              | 6,955177044  | 6,881856054  | 0,07332099  |  |
| 1554339_a_at | COG3              | -1,888254346 | -1,961547147 | 0,073292802 |  |
| 1559394_a_at | -                 | -1,888254346 | -1,961547147 | 0,073292802 |  |
| 1560078_at   | LAMA3             | -1,888254346 | -1,961547147 | 0,073292802 |  |
| 1561820_at   | SCN8A             | -1,888254346 | -1,961547147 | 0,073292802 |  |
| 1562785_at   | -                 | -1,888254346 | -1,961547147 | 0,073292802 |  |
| 1569792_a_at | METT120           | -1,888254346 | -1,961547147 | 0,073292802 |  |
| 1569854_at   | -                 | -1,888254346 | -1,961547147 | 0,073292802 |  |
| 1570630_at   | -                 | -1,888254346 | -1,961547147 | 0,073292802 |  |
| 206345_s_at  | PON1              | -1,888254346 | -1,961547147 | 0,073292802 |  |
| 211044_at    | TRIM14            | -1,888254346 | -1,961547147 | 0,073292802 |  |
| 211302_s_at  | PDE4B             | -1,888254346 | -1,961547147 | 0,073292802 |  |
| 214936_at    | LRCH1             | -1,888254346 | -1,961547147 | 0,073292802 |  |
| 215351_at    | -                 | -1,888254346 | -1,961547147 | 0,073292802 |  |
| 220783_at    | MMP27             | -1,888254346 | -1,961547147 | 0,073292802 |  |
| 224293_at    | TTY10             | -1,888254346 | -1,961547147 | 0,073292802 |  |
| 224310_s_at  | BCL11B            | -1,888254346 | -1,961547147 | 0,073292802 |  |
| 224421_x_at  | PMCHL1            | -1,888254346 | -1,961547147 | 0,073292802 |  |
| 229187_at    | LOC283788         | -1,888254346 | -1,961547147 | 0,073292802 |  |
| 230232_at    | SEL1L3            | -1,888254346 | -1,961547147 | 0,073292802 |  |
| 232531_at    | EMX2OS            | -1,888254346 | -1,961547147 | 0,073292802 |  |
| 235133_at    | ZDHC14            | -1,888254346 | -1,961547147 | 0,073292802 |  |

|              |                 |              |              |             |  |
|--------------|-----------------|--------------|--------------|-------------|--|
| 237164_at    | -               | -1,888254346 | -1,961547147 | 0,073292802 |  |
| 238928_at    | -               | -1,888254346 | -1,961547147 | 0,073292802 |  |
| 240828_at    | JARID2-AS1      | -1,888254346 | -1,961547147 | 0,073292802 |  |
| 66053_at     | HNRNPUL2 /// H  | 0,634475464  | 0,561197255  | 0,073278209 |  |
| 1560175_at   | PPP4R1L         | -1,838812296 | -1,912089812 | 0,073277516 |  |
| 205630_at    | CRH             | -1,838812296 | -1,912089812 | 0,073277516 |  |
| 208039_at    | -               | -1,838812296 | -1,912089812 | 0,073277516 |  |
| 209245_s_at  | KIF1C           | -1,838812296 | -1,912089812 | 0,073277516 |  |
| 213895_at    | EMP1            | -1,838812296 | -1,912089812 | 0,073277516 |  |
| 214534_at    | HIST1H1B        | -1,838812296 | -1,912089812 | 0,073277516 |  |
| 219229_at    | SLCO3A1         | -1,838812296 | -1,912089812 | 0,073277516 |  |
| 219232_s_at  | EGLN3           | -1,838812296 | -1,912089812 | 0,073277516 |  |
| 227697_at    | SOCS3           | -1,838812296 | -1,912089812 | 0,073277516 |  |
| 229497_at    | ANKDD1A         | -1,838812296 | -1,912089812 | 0,073277516 |  |
| 229947_at    | PI15            | -1,838812296 | -1,912089812 | 0,073277516 |  |
| 233390_at    | -               | -1,838812296 | -1,912089812 | 0,073277516 |  |
| 235941_s_at  | FAM224A         | -1,838812296 | -1,912089812 | 0,073277516 |  |
| 244654_at    | MYO1G           | -1,838812296 | -1,912089812 | 0,073277516 |  |
| 1560679_at   | LOC100506328    | -2,01371626  | -2,086984744 | 0,073268483 |  |
| 1564282_a_at | LINC00491       | -2,01371626  | -2,086984744 | 0,073268483 |  |
| 1570335_at   | -               | -2,01371626  | -2,086984744 | 0,073268483 |  |
| 206773_at    | LY6H            | -2,01371626  | -2,086984744 | 0,073268483 |  |
| 210467_x_at  | MAGEA12         | -2,01371626  | -2,086984744 | 0,073268483 |  |
| 211132_at    | INTS3           | -2,01371626  | -2,086984744 | 0,073268483 |  |
| 220088_at    | C5AR1           | -2,01371626  | -2,086984744 | 0,073268483 |  |
| 222696_at    | AXIN2           | -2,01371626  | -2,086984744 | 0,073268483 |  |
| 232453_at    | -               | -2,01371626  | -2,086984744 | 0,073268483 |  |
| 234537_at    | -               | -2,01371626  | -2,086984744 | 0,073268483 |  |
| 236185_at    | NHLRC2          | -2,01371626  | -2,086984744 | 0,073268483 |  |
| 236295_s_at  | MIR3929 /// NLR | -2,01371626  | -2,086984744 | 0,073268483 |  |
| 237828_at    | SRRM4           | -2,01371626  | -2,086984744 | 0,073268483 |  |
| 238986_at    | FLJ43663        | -2,01371626  | -2,086984744 | 0,073268483 |  |
| 243486_at    | -               | -2,01371626  | -2,086984744 | 0,073268483 |  |
| 244691_at    | SETD5           | -2,01371626  | -2,086984744 | 0,073268483 |  |
| 218196_at    | OSTM1           | 3,444167073  | 3,370970266  | 0,073196808 |  |
| 1557389_at   | LOC100505839    | -2,089474779 | -2,162639771 | 0,073164992 |  |
| 1559526_at   | -               | -2,089474779 | -2,162639771 | 0,073164992 |  |
| 1559737_at   | -               | -2,089474779 | -2,162639771 | 0,073164992 |  |
| 1561723_at   | -               | -2,089474779 | -2,162639771 | 0,073164992 |  |
| 1564828_at   | KIAA1211        | -2,089474779 | -2,162639771 | 0,073164992 |  |
| 1564972_x_at | SETDB2          | -2,089474779 | -2,162639771 | 0,073164992 |  |
| 204400_at    | EFS             | -2,089474779 | -2,162639771 | 0,073164992 |  |
| 206458_s_at  | WNT2B           | -2,089474779 | -2,162639771 | 0,073164992 |  |
| 207581_s_at  | MAGEB4          | -2,089474779 | -2,162639771 | 0,073164992 |  |
| 208421_at    | -               | -2,089474779 | -2,162639771 | 0,073164992 |  |
| 214529_at    | TSHB            | -2,089474779 | -2,162639771 | 0,073164992 |  |
| 214985_at    | EXT1            | -2,089474779 | -2,162639771 | 0,073164992 |  |
| 217068_at    | -               | -2,089474779 | -2,162639771 | 0,073164992 |  |
| 219528_s_at  | BCL11B          | -2,089474779 | -2,162639771 | 0,073164992 |  |
| 219750_at    | TMEM144         | -2,089474779 | -2,162639771 | 0,073164992 |  |
| 220184_at    | NANOG           | -2,089474779 | -2,162639771 | 0,073164992 |  |
| 221075_s_at  | NCR2            | -2,089474779 | -2,162639771 | 0,073164992 |  |
| 228534_s_at  | -               | -2,089474779 | -2,162639771 | 0,073164992 |  |
| 228969_at    | AGR2            | -2,089474779 | -2,162639771 | 0,073164992 |  |
| 229877_at    | NEO1            | -2,089474779 | -2,162639771 | 0,073164992 |  |
| 230928_at    | -               | -2,089474779 | -2,162639771 | 0,073164992 |  |

|              |                  |              |              |             |  |
|--------------|------------------|--------------|--------------|-------------|--|
| 232485_at    | SNX29            | -2,089474779 | -2,162639771 | 0,073164992 |  |
| 232689_at    | LOC284561        | -2,089474779 | -2,162639771 | 0,073164992 |  |
| 232734_at    | TTC23            | -2,089474779 | -2,162639771 | 0,073164992 |  |
| 236786_at    | FAM135B          | -2,089474779 | -2,162639771 | 0,073164992 |  |
| 237787_at    | -                | -2,089474779 | -2,162639771 | 0,073164992 |  |
| 238226_at    | FAM70B           | -2,089474779 | -2,162639771 | 0,073164992 |  |
| 238354_x_at  | -                | -2,089474779 | -2,162639771 | 0,073164992 |  |
| 238846_at    | TNFRSF11A        | -2,089474779 | -2,162639771 | 0,073164992 |  |
| 239653_at    | -                | -2,089474779 | -2,162639771 | 0,073164992 |  |
| 244238_at    | -                | -2,089474779 | -2,162639771 | 0,073164992 |  |
| 244796_at    | -                | -2,089474779 | -2,162639771 | 0,073164992 |  |
| 1564333_a_at | PSAPL1           | 0,152582607  | 0,079428135  | 0,073154472 |  |
| 232534_at    | LIN37            | 0,152582607  | 0,079428135  | 0,073154472 |  |
| 200693_at    | YWHAQ            | 6,134630082  | 6,061481705  | 0,073148377 |  |
| 208923_at    | CYFIP1           | 4,322962984  | 4,249823666  | 0,073139318 |  |
| 203352_at    | ORC4             | 1,153678675  | 1,080561626  | 0,073117049 |  |
| 208947_s_at  | UPF1             | 1,153678675  | 1,080561626  | 0,073117049 |  |
| 200016_x_at  | HNRNPA1          | 7,680585549  | 7,607475867  | 0,073109682 |  |
| 217811_at    | SELT             | 6,035409686  | 5,962345958  | 0,073063728 |  |
| 215587_x_at  | -                | 0,641402394  | 0,568365095  | 0,073037299 |  |
| 223091_x_at  | MFF              | 0,641402394  | 0,568365095  | 0,073037299 |  |
| 209835_x_at  | CD44             | 1,534677255  | 1,461646549  | 0,073030706 |  |
| 213110_s_at  | COL4A5           | 1,534677255  | 1,461646549  | 0,073030706 |  |
| 203107_x_at  | RPS2 /// SNORA   | 8,124340598  | 8,051312814  | 0,073027785 |  |
| 215982_s_at  | DOM3Z            | 2,227406889  | 2,154405725  | 0,073001164 |  |
| 201015_s_at  | JUP              | 2,923969333  | 2,851017268  | 0,072952065 |  |
| 1553157_at   | LHX4             | -2,138804305 | -2,211750327 | 0,072946022 |  |
| 1553335_x_at | LOC285696        | -2,138804305 | -2,211750327 | 0,072946022 |  |
| 1555580_at   | -                | -2,138804305 | -2,211750327 | 0,072946022 |  |
| 1556725_a_at | LOC100288490     | -2,138804305 | -2,211750327 | 0,072946022 |  |
| 1558682_at   | HMGA2            | -2,138804305 | -2,211750327 | 0,072946022 |  |
| 1564148_at   | -                | -2,138804305 | -2,211750327 | 0,072946022 |  |
| 1569122_at   | -                | -2,138804305 | -2,211750327 | 0,072946022 |  |
| 206030_at    | ASPA             | -2,138804305 | -2,211750327 | 0,072946022 |  |
| 214557_at    | PTTG2            | -2,138804305 | -2,211750327 | 0,072946022 |  |
| 215262_at    | -                | -2,138804305 | -2,211750327 | 0,072946022 |  |
| 215284_at    | -                | -2,138804305 | -2,211750327 | 0,072946022 |  |
| 217424_at    | -                | -2,138804305 | -2,211750327 | 0,072946022 |  |
| 218182_s_at  | CLDN1            | -2,138804305 | -2,211750327 | 0,072946022 |  |
| 219965_s_at  | MAGIX            | -2,138804305 | -2,211750327 | 0,072946022 |  |
| 223926_at    | KIF2B            | -2,138804305 | -2,211750327 | 0,072946022 |  |
| 223975_at    | TRIM51 /// TRIM5 | -2,138804305 | -2,211750327 | 0,072946022 |  |
| 231589_at    | -                | -2,138804305 | -2,211750327 | 0,072946022 |  |
| 231696_x_at  | TMEM50B          | -2,138804305 | -2,211750327 | 0,072946022 |  |
| 231762_at    | FGF10            | -2,138804305 | -2,211750327 | 0,072946022 |  |
| 235523_at    | CTC1             | -2,138804305 | -2,211750327 | 0,072946022 |  |
| 238165_at    | PDZRN3           | -2,138804305 | -2,211750327 | 0,072946022 |  |
| 241110_at    | -                | -2,138804305 | -2,211750327 | 0,072946022 |  |
| 241759_at    | -                | -2,138804305 | -2,211750327 | 0,072946022 |  |
| 243770_at    | ZNF483           | -2,138804305 | -2,211750327 | 0,072946022 |  |
| 243784_s_at  | LOC100272217     | -2,138804305 | -2,211750327 | 0,072946022 |  |
| 200975_at    | PPT1             | 5,158634383  | 5,085689237  | 0,072945147 |  |
| 1555860_x_at | LOC440944        | 1,296557217  | 1,223626587  | 0,07293063  |  |
| 221979_at    | LOC100129250     | 2,745814053  | 2,672945617  | 0,072868435 |  |
| 1552965_a_at | B3GNT7           | -1,71423189  | -1,787089803 | 0,072857913 |  |
| 1560787_at   | QDPR             | -1,71423189  | -1,787089803 | 0,072857913 |  |

|              |                 |              |              |             |  |
|--------------|-----------------|--------------|--------------|-------------|--|
| 1562590_at   | PRTG            | -1,71423189  | -1,787089803 | 0,072857913 |  |
| 1562625_at   | FRYL            | -1,71423189  | -1,787089803 | 0,072857913 |  |
| 1565608_at   | -               | -1,71423189  | -1,787089803 | 0,072857913 |  |
| 205968_at    | KCNS3           | -1,71423189  | -1,787089803 | 0,072857913 |  |
| 206684_s_at  | ATF7            | -1,71423189  | -1,787089803 | 0,072857913 |  |
| 207558_s_at  | PITX2           | -1,71423189  | -1,787089803 | 0,072857913 |  |
| 215144_at    | -               | -1,71423189  | -1,787089803 | 0,072857913 |  |
| 236163_at    | LIX1            | -1,71423189  | -1,787089803 | 0,072857913 |  |
| 243823_at    | -               | -1,71423189  | -1,787089803 | 0,072857913 |  |
| 243894_at    | SLC41A2         | -1,71423189  | -1,787089803 | 0,072857913 |  |
| 244747_at    | NPNT            | -1,71423189  | -1,787089803 | 0,072857913 |  |
| 210288_at    | KLRG1           | 0,425644434  | 0,352836757  | 0,072807676 |  |
| 234993_at    | ABHD13          | 0,425644434  | 0,352836757  | 0,072807676 |  |
| 213324_at    | SRC             | 0,841135803  | 0,768343791  | 0,072792012 |  |
| 201961_s_at  | RNF41           | 1,163336153  | 1,090553537  | 0,072782616 |  |
| 227157_at    | CCDC111         | 1,542099044  | 1,469325098  | 0,072773946 |  |
| 201813_s_at  | TBC1D5          | 1,748661581  | 1,675891488  | 0,072770093 |  |
| 204866_at    | PHF16           | 3,456984333  | 3,384231608  | 0,072752725 |  |
| 204319_s_at  | RGS10           | 4,749296484  | 4,676548291  | 0,072748194 |  |
| 208783_s_at  | CD46            | 4,689563828  | 4,616873117  | 0,072690711 |  |
| 225530_at    | MOB3A           | 1,932146506  | 1,859476797  | 0,072669709 |  |
| 212103_at    | KPNA6 /// LOC10 | 3,014789032  | 2,942125533  | 0,072663499 |  |
| 201073_s_at  | SMARCC1         | 2,546213279  | 2,473581079  | 0,0726322   |  |
| 209806_at    | HIST1H2BK       | 7,706206571  | 7,633605262  | 0,072601309 |  |
| 212093_s_at  | MTUS1           | 2,097427503  | 2,024923328  | 0,072504175 |  |
| 223506_at    | ZC3H8           | 3,523171367  | 3,450709925  | 0,072461442 |  |
| 225600_at    | TRIQQ           | 1,758252436  | 1,685812099  | 0,072440337 |  |
| 207061_at    | ERN1            | -0,148196756 | -0,220592223 | 0,072395467 |  |
| 211605_s_at  | RARA            | -0,148196756 | -0,220592223 | 0,072395467 |  |
| 231006_at    | SPATA8          | -0,148196756 | -0,220592223 | 0,072395467 |  |
| 231531_at    | C3orf24         | -0,148196756 | -0,220592223 | 0,072395467 |  |
| 1553299_at   | DUSP5P          | -2,262747984 | -2,335104118 | 0,072356134 |  |
| 1553793_a_at | KIAA1109        | -2,262747984 | -2,335104118 | 0,072356134 |  |
| 1558306_at   | THADA           | -2,262747984 | -2,335104118 | 0,072356134 |  |
| 1559624_at   | STK32A          | -2,262747984 | -2,335104118 | 0,072356134 |  |
| 1565588_at   | SP140L          | -2,262747984 | -2,335104118 | 0,072356134 |  |
| 1566301_at   | PPP1R11         | -2,262747984 | -2,335104118 | 0,072356134 |  |
| 1570360_s_at | DDX3Y           | -2,262747984 | -2,335104118 | 0,072356134 |  |
| 205314_x_at  | SNTB2           | -2,262747984 | -2,335104118 | 0,072356134 |  |
| 206218_at    | MAGEB2          | -2,262747984 | -2,335104118 | 0,072356134 |  |
| 210560_at    | GBX2            | -2,262747984 | -2,335104118 | 0,072356134 |  |
| 214796_at    | KIAA1456        | -2,262747984 | -2,335104118 | 0,072356134 |  |
| 220696_at    | -               | -2,262747984 | -2,335104118 | 0,072356134 |  |
| 231308_at    | -               | -2,262747984 | -2,335104118 | 0,072356134 |  |
| 232941_at    | TMPRSS6         | -2,262747984 | -2,335104118 | 0,072356134 |  |
| 233291_at    | -               | -2,262747984 | -2,335104118 | 0,072356134 |  |
| 234556_at    | -               | -2,262747984 | -2,335104118 | 0,072356134 |  |
| 236944_at    | -               | -2,262747984 | -2,335104118 | 0,072356134 |  |
| 237543_at    | -               | -2,262747984 | -2,335104118 | 0,072356134 |  |
| 237627_at    | -               | -2,262747984 | -2,335104118 | 0,072356134 |  |
| 240545_at    | LOC286382       | -2,262747984 | -2,335104118 | 0,072356134 |  |
| 240715_at    | TBX5            | -2,262747984 | -2,335104118 | 0,072356134 |  |
| 242656_at    | GTF2H1          | -2,262747984 | -2,335104118 | 0,072356134 |  |
| 243431_at    | -               | -2,262747984 | -2,335104118 | 0,072356134 |  |
| 243990_at    | -               | -2,262747984 | -2,335104118 | 0,072356134 |  |
| 201308_s_at  | 40787           | 0,661985843  | 0,589657387  | 0,072328456 |  |



|              |                 |              |              |             |  |
|--------------|-----------------|--------------|--------------|-------------|--|
| 217363_x_at  | -               | 1,177702228  | 1,105412836  | 0,072289392 |  |
| 1563045_at   | -               | -0,57445847  | -0,646746079 | 0,072287608 |  |
| 205844_at    | VNN1            | -0,57445847  | -0,646746079 | 0,072287608 |  |
| 211469_s_at  | CXCR6           | -0,57445847  | -0,646746079 | 0,072287608 |  |
| 223971_at    | OR2A20P /// OR2 | -0,57445847  | -0,646746079 | 0,072287608 |  |
| 229272_at    | FNBP4           | -0,57445847  | -0,646746079 | 0,072287608 |  |
| 229591_at    | LRP5            | -0,57445847  | -0,646746079 | 0,072287608 |  |
| 236899_at    | -               | -0,57445847  | -0,646746079 | 0,072287608 |  |
| 243299_at    | -               | -0,57445847  | -0,646746079 | 0,072287608 |  |
| 226165_at    | C8orf59         | 6,082297741  | 6,01009441   | 0,07220333  |  |
| 201680_x_at  | SRRT            | 4,935173991  | 4,862972786  | 0,072201205 |  |
| 228024_at    | VPS37A          | 1,318332599  | 1,246149888  | 0,072182711 |  |
| 219778_at    | ZFPM2           | 0,181384709  | 0,109221392  | 0,072163317 |  |
| 229024_at    | -               | 0,181384709  | 0,109221392  | 0,072163317 |  |
| 229033_s_at  | MUM1            | 0,181384709  | 0,109221392  | 0,072163317 |  |
| 222977_at    | SURF4           | 4,252325187  | 4,180180181  | 0,072145007 |  |
| 242873_at    | -               | 2,030406107  | 1,958277216  | 0,072128891 |  |
| 1552455_at   | PRUNE2          | -1,591296941 | -1,663414495 | 0,072117553 |  |
| 1553282_at   | C21orf128       | -1,591296941 | -1,663414495 | 0,072117553 |  |
| 1553443_at   | FER1L6-AS1      | -1,591296941 | -1,663414495 | 0,072117553 |  |
| 1563404_at   | -               | -1,591296941 | -1,663414495 | 0,072117553 |  |
| 1565065_at   | OFCC1           | -1,591296941 | -1,663414495 | 0,072117553 |  |
| 1566514_at   | CWF19L2         | -1,591296941 | -1,663414495 | 0,072117553 |  |
| 205158_at    | RNASE4          | -1,591296941 | -1,663414495 | 0,072117553 |  |
| 205500_at    | C5              | -1,591296941 | -1,663414495 | 0,072117553 |  |
| 206375_s_at  | HSPB3           | -1,591296941 | -1,663414495 | 0,072117553 |  |
| 211889_x_at  | CEACAM1         | -1,591296941 | -1,663414495 | 0,072117553 |  |
| 214871_x_at  | LOC100287590    | -1,591296941 | -1,663414495 | 0,072117553 |  |
| 215862_at    | -               | -1,591296941 | -1,663414495 | 0,072117553 |  |
| 216773_at    | -               | -1,591296941 | -1,663414495 | 0,072117553 |  |
| 221668_s_at  | DNAI2           | -1,591296941 | -1,663414495 | 0,072117553 |  |
| 223745_at    | C16orf95        | -1,591296941 | -1,663414495 | 0,072117553 |  |
| 225021_at    | ZNF532          | -1,591296941 | -1,663414495 | 0,072117553 |  |
| 228212_at    | ISM2            | -1,591296941 | -1,663414495 | 0,072117553 |  |
| 229004_at    | ADAMTS15        | -1,591296941 | -1,663414495 | 0,072117553 |  |
| 229993_at    | ZCCHC3          | -1,591296941 | -1,663414495 | 0,072117553 |  |
| 233442_at    | -               | -1,591296941 | -1,663414495 | 0,072117553 |  |
| 233850_s_at  | EBF4            | -1,591296941 | -1,663414495 | 0,072117553 |  |
| 234965_at    | -               | -1,591296941 | -1,663414495 | 0,072117553 |  |
| 237856_at    | RAP1GDS1        | -1,591296941 | -1,663414495 | 0,072117553 |  |
| 237862_at    | LOC100506189    | -1,591296941 | -1,663414495 | 0,072117553 |  |
| 239826_at    | -               | -1,591296941 | -1,663414495 | 0,072117553 |  |
| 242572_at    | -               | -1,591296941 | -1,663414495 | 0,072117553 |  |
| 242598_at    | -               | -1,591296941 | -1,663414495 | 0,072117553 |  |
| 243137_at    | -               | -1,591296941 | -1,663414495 | 0,072117553 |  |
| 212191_x_at  | RPL13 /// SNORD | 6,932412531  | 6,860299605  | 0,072112927 |  |
| 201487_at    | CTSC            | 3,671816548  | 3,599822964  | 0,071993583 |  |
| 206291_at    | NTS             | 7,484474452  | 7,412504958  | 0,071969494 |  |
| 222537_s_at  | CDC42SE1        | 1,187200746  | 1,115234684  | 0,071966062 |  |
| 223663_at    | CCDC88B         | 1,187200746  | 1,115234684  | 0,071966062 |  |
| 224892_at    | PLDN            | 4,954075234  | 4,8821546    | 0,071920634 |  |
| 229460_at    | FAM126B         | 2,912562019  | 2,840694075  | 0,071867944 |  |
| 1552291_at   | PIGX            | 0,67554678   | 0,603679647  | 0,071867133 |  |
| 1554160_a_at | ZNF446          | 0,67554678   | 0,603679647  | 0,071867133 |  |
| 212026_s_at  | EXOC7           | 0,67554678   | 0,603679647  | 0,071867133 |  |
| 225905_s_at  | ST3GAL3         | 0,67554678   | 0,603679647  | 0,071867133 |  |

|              |                |              |              |             |  |
|--------------|----------------|--------------|--------------|-------------|--|
| 222748_s_at  | TXNL4B         | 1,868628927  | 1,796776588  | 0,071852339 |  |
| 1562274_at   | -              | -1,543331864 | -1,615132408 | 0,071800543 |  |
| 205911_at    | PTH1R          | -1,543331864 | -1,615132408 | 0,071800543 |  |
| 214497_s_at  | NHLH2          | -1,543331864 | -1,615132408 | 0,071800543 |  |
| 218044_x_at  | PTMS           | -1,543331864 | -1,615132408 | 0,071800543 |  |
| 231456_at    | -              | -1,543331864 | -1,615132408 | 0,071800543 |  |
| 232526_at    | ITPKB          | -1,543331864 | -1,615132408 | 0,071800543 |  |
| 232956_at    | -              | -1,543331864 | -1,615132408 | 0,071800543 |  |
| 235046_at    | INPP4B         | -1,543331864 | -1,615132408 | 0,071800543 |  |
| 236621_at    | RPS27          | -1,543331864 | -1,615132408 | 0,071800543 |  |
| 238173_at    | TCEA2          | -1,543331864 | -1,615132408 | 0,071800543 |  |
| 239593_at    | TMEM213        | -1,543331864 | -1,615132408 | 0,071800543 |  |
| 242489_at    | -              | -1,543331864 | -1,615132408 | 0,071800543 |  |
| 242778_at    | LPXN           | -1,543331864 | -1,615132408 | 0,071800543 |  |
| 221474_at    | MYL12B         | 6,263267197  | 6,191493336  | 0,071773861 |  |
| 214288_s_at  | PSMB1          | 7,230712925  | 7,158939524  | 0,071773401 |  |
| 203781_at    | MRPL33         | 4,671912228  | 4,600140481  | 0,071771747 |  |
| 204174_at    | ALOX5AP        | 1,331241794  | 1,259496994  | 0,071744799 |  |
| 238190_at    | TUFM           | 1,331241794  | 1,259496994  | 0,071744799 |  |
| 222103_at    | ATF1           | 4,60394751   | 4,532344882  | 0,071602628 |  |
| 208986_at    | TCF12          | 3,899783451  | 3,828227545  | 0,071555906 |  |
| 201458_s_at  | BUB3           | 4,28697245   | 4,215422121  | 0,071550328 |  |
| 1556749_at   | -              | -2,384869671 | -2,456406426 | 0,071536755 |  |
| 1557398_at   | -              | -2,384869671 | -2,456406426 | 0,071536755 |  |
| 1564856_s_at | LOC727924      | -2,384869671 | -2,456406426 | 0,071536755 |  |
| 1566486_at   | -              | -2,384869671 | -2,456406426 | 0,071536755 |  |
| 1566605_at   | TEX9           | -2,384869671 | -2,456406426 | 0,071536755 |  |
| 209309_at    | AZGP1          | -2,384869671 | -2,456406426 | 0,071536755 |  |
| 211736_at    | SP2            | -2,384869671 | -2,456406426 | 0,071536755 |  |
| 214982_at    | SNRNP200       | -2,384869671 | -2,456406426 | 0,071536755 |  |
| 215290_at    | -              | -2,384869671 | -2,456406426 | 0,071536755 |  |
| 216972_at    | SPAM1          | -2,384869671 | -2,456406426 | 0,071536755 |  |
| 217623_at    | MYLK3          | -2,384869671 | -2,456406426 | 0,071536755 |  |
| 229942_at    | BNC2           | -2,384869671 | -2,456406426 | 0,071536755 |  |
| 233047_at    | FRMD7          | -2,384869671 | -2,456406426 | 0,071536755 |  |
| 233704_at    | -              | -2,384869671 | -2,456406426 | 0,071536755 |  |
| 239724_at    | -              | -2,384869671 | -2,456406426 | 0,071536755 |  |
| 240814_at    | MGC39584       | -2,384869671 | -2,456406426 | 0,071536755 |  |
| 243200_at    | -              | -2,384869671 | -2,456406426 | 0,071536755 |  |
| 1554102_a_at | TMTC4          | 0,20027154   | 0,128747141  | 0,071524399 |  |
| 204746_s_at  | PICK1          | 0,20027154   | 0,128747141  | 0,071524399 |  |
| 221443_x_at  | PRLH           | 0,20027154   | 0,128747141  | 0,071524399 |  |
| 242974_at    | CD47           | 0,20027154   | 0,128747141  | 0,071524399 |  |
| 229654_at    | -              | 3,270743649  | 3,199221717  | 0,071521932 |  |
| 210149_s_at  | ATP5H          | 6,36275821   | 6,291253623  | 0,071504588 |  |
| 203774_at    | MTR            | 3,606946883  | 3,535445117  | 0,071501766 |  |
| 230268_at    | -              | 1,201332287  | 1,129843209  | 0,071489078 |  |
| 232181_at    | PPARGC1B       | 1,201332287  | 1,129843209  | 0,071489078 |  |
| 223042_s_at  | FUNDG2         | 4,846163912  | 4,77470758   | 0,071456332 |  |
| 224655_at    | AK3            | 3,738747209  | 3,667303849  | 0,07144336  |  |
| 222503_s_at  | WDR41          | 3,495722611  | 3,424287521  | 0,071435089 |  |
| 219785_s_at  | C16orf95       | 2,051361651  | 1,979940779  | 0,071420873 |  |
| 214243_s_at  | SERHL /// SERH | -0,543051993 | -0,614371577 | 0,071319583 |  |
| 227537_s_at  | SP3            | -0,543051993 | -0,614371577 | 0,071319583 |  |
| 228458_at    | C6orf226       | -0,543051993 | -0,614371577 | 0,071319583 |  |
| 231991_at    | C20orf160      | -0,543051993 | -0,614371577 | 0,071319583 |  |

|              |                 |              |              |             |  |
|--------------|-----------------|--------------|--------------|-------------|--|
| 232016_at    | -               | -0,543051993 | -0,614371577 | 0,071319583 |  |
| 237583_at    | -               | -0,543051993 | -0,614371577 | 0,071319583 |  |
| 203010_at    | STAT5A          | 3,132544588  | 3,061230246  | 0,071314343 |  |
| 1564232_at   | LOC100506453 /  | 0,695652136  | 0,624460759  | 0,071191377 |  |
| 210236_at    | PPFIA1          | 0,888485433  | 0,817300337  | 0,071185097 |  |
| 208882_s_at  | UBR5            | 4,040056475  | 3,968932193  | 0,071124282 |  |
| 1553127_a_at | RNF168          | -2,43257096  | -2,503677622 | 0,071106662 |  |
| 1554624_a_at | LOC100653194 /  | -2,43257096  | -2,503677622 | 0,071106662 |  |
| 1555261_at   | -               | -2,43257096  | -2,503677622 | 0,071106662 |  |
| 1557874_at   | GRID1-AS1       | -2,43257096  | -2,503677622 | 0,071106662 |  |
| 1560422_at   | -               | -2,43257096  | -2,503677622 | 0,071106662 |  |
| 1560960_at   | -               | -2,43257096  | -2,503677622 | 0,071106662 |  |
| 1565898_at   | METTL15         | -2,43257096  | -2,503677622 | 0,071106662 |  |
| 1566465_at   | KCNK1           | -2,43257096  | -2,503677622 | 0,071106662 |  |
| 1570290_at   | -               | -2,43257096  | -2,503677622 | 0,071106662 |  |
| 1570601_at   | -               | -2,43257096  | -2,503677622 | 0,071106662 |  |
| 205619_s_at  | MEOX1           | -2,43257096  | -2,503677622 | 0,071106662 |  |
| 209988_s_at  | ASCL1           | -2,43257096  | -2,503677622 | 0,071106662 |  |
| 217577_at    | -               | -2,43257096  | -2,503677622 | 0,071106662 |  |
| 220380_at    | DNASE2B         | -2,43257096  | -2,503677622 | 0,071106662 |  |
| 220639_at    | TM4SF20         | -2,43257096  | -2,503677622 | 0,071106662 |  |
| 223986_x_at  | DMRT2           | -2,43257096  | -2,503677622 | 0,071106662 |  |
| 224295_at    | -               | -2,43257096  | -2,503677622 | 0,071106662 |  |
| 231405_at    | SPACA7          | -2,43257096  | -2,503677622 | 0,071106662 |  |
| 233094_at    | -               | -2,43257096  | -2,503677622 | 0,071106662 |  |
| 233556_at    | CRYBB2P1        | -2,43257096  | -2,503677622 | 0,071106662 |  |
| 234764_x_at  | CKAP2 /// IGLC1 | -2,43257096  | -2,503677622 | 0,071106662 |  |
| 234778_at    | -               | -2,43257096  | -2,503677622 | 0,071106662 |  |
| 235199_at    | RNF125          | -2,43257096  | -2,503677622 | 0,071106662 |  |
| 235778_s_at  | ANKRD44         | -2,43257096  | -2,503677622 | 0,071106662 |  |
| 238258_at    | WBSCR28         | -2,43257096  | -2,503677622 | 0,071106662 |  |
| 239829_at    | -               | -2,43257096  | -2,503677622 | 0,071106662 |  |
| 240838_s_at  | LOC145837       | -2,43257096  | -2,503677622 | 0,071106662 |  |
| 241621_at    | SMCHD1          | -2,43257096  | -2,503677622 | 0,071106662 |  |
| 243525_at    | -               | -2,43257096  | -2,503677622 | 0,071106662 |  |
| 244225_x_at  | LMNA            | -2,43257096  | -2,503677622 | 0,071106662 |  |
| 1553723_at   | GPR97           | -1,470833215 | -1,541908042 | 0,071074826 |  |
| 1555738_at   | CMTM1           | -1,470833215 | -1,541908042 | 0,071074826 |  |
| 1558053_s_at | TMED4           | -1,470833215 | -1,541908042 | 0,071074826 |  |
| 1566476_at   | -               | -1,470833215 | -1,541908042 | 0,071074826 |  |
| 1568864_at   | LOC100131691    | -1,470833215 | -1,541908042 | 0,071074826 |  |
| 209847_at    | CDH17           | -1,470833215 | -1,541908042 | 0,071074826 |  |
| 215750_at    | -               | -1,470833215 | -1,541908042 | 0,071074826 |  |
| 222776_at    | MAGOHB          | -1,470833215 | -1,541908042 | 0,071074826 |  |
| 223691_at    | RGS22           | -1,470833215 | -1,541908042 | 0,071074826 |  |
| 229064_s_at  | RCAN3           | -1,470833215 | -1,541908042 | 0,071074826 |  |
| 232625_at    | TLN2            | -1,470833215 | -1,541908042 | 0,071074826 |  |
| 232805_at    | -               | -1,470833215 | -1,541908042 | 0,071074826 |  |
| 232954_at    | -               | -1,470833215 | -1,541908042 | 0,071074826 |  |
| 235754_at    | HFE             | -1,470833215 | -1,541908042 | 0,071074826 |  |
| 236508_at    | SLC6A5          | -1,470833215 | -1,541908042 | 0,071074826 |  |
| 237971_at    | -               | -1,470833215 | -1,541908042 | 0,071074826 |  |
| 240834_at    | FAM105B         | -1,470833215 | -1,541908042 | 0,071074826 |  |
| 241663_at    | C3orf23         | -1,470833215 | -1,541908042 | 0,071074826 |  |
| 244252_at    | LOC399884       | -1,470833215 | -1,541908042 | 0,071074826 |  |
| 244402_at    | -               | -1,470833215 | -1,541908042 | 0,071074826 |  |

|              |                 |              |              |             |  |
|--------------|-----------------|--------------|--------------|-------------|--|
| 208759_at    | NCSTN           | 2,416948786  | 2,345926937  | 0,071021849 |  |
| 212262_at    | QKI             | 3,024094427  | 2,953119918  | 0,070974509 |  |
| 64883_at     | MOSPD2          | 1,143956113  | 1,073022014  | 0,070934099 |  |
| 218572_at    | CHMP4A /// TM9  | 2,596981013  | 2,526063925  | 0,070917088 |  |
| 228738_at    | D2HGDH          | 1,481627361  | 1,410714371  | 0,07091299  |  |
| 203041_s_at  | LAMP2           | 4,291933439  | 4,221118236  | 0,070815203 |  |
| 217773_s_at  | NDUFA4          | 6,257643072  | 6,18684359   | 0,070799482 |  |
| 213792_s_at  | INSR            | 2,807162789  | 2,7363693    | 0,070793489 |  |
| 202348_s_at  | TOR1A           | 3,292909151  | 3,222126232  | 0,070782919 |  |
| 218607_s_at  | SDAD1           | 3,425226911  | 3,354479478  | 0,070747434 |  |
| 1553011_at   | TAF1L           | -1,424023738 | -1,494668682 | 0,070644943 |  |
| 1564639_at   | LOC100291323    | -1,424023738 | -1,494668682 | 0,070644943 |  |
| 1568698_at   | TMEM232         | -1,424023738 | -1,494668682 | 0,070644943 |  |
| 217154_s_at  | EDN3            | -1,424023738 | -1,494668682 | 0,070644943 |  |
| 228570_at    | BTBD11          | -1,424023738 | -1,494668682 | 0,070644943 |  |
| 234082_at    | -               | -1,424023738 | -1,494668682 | 0,070644943 |  |
| 234775_at    | OR51B5          | -1,424023738 | -1,494668682 | 0,070644943 |  |
| 237263_at    | -               | -1,424023738 | -1,494668682 | 0,070644943 |  |
| 238188_at    | LOC100506642    | -1,424023738 | -1,494668682 | 0,070644943 |  |
| 239351_at    | -               | -1,424023738 | -1,494668682 | 0,070644943 |  |
| 241380_at    | ARHGEF37        | -1,424023738 | -1,494668682 | 0,070644943 |  |
| 241778_at    | NT5C2           | -1,424023738 | -1,494668682 | 0,070644943 |  |
| 244517_x_at  | -               | -1,424023738 | -1,494668682 | 0,070644943 |  |
| 211595_s_at  | MRPS11          | 3,787958926  | 3,717332003  | 0,070626923 |  |
| 1562257_x_at | NLRP1           | 0,228146222  | 0,157549243  | 0,070596979 |  |
| 242159_at    | LOC100506684    | 0,228146222  | 0,157549243  | 0,070596979 |  |
| 207039_at    | CDKN2A          | 5,206127244  | 5,135553145  | 0,070574099 |  |
| 200599_s_at  | HSP90B1 /// MIR | 6,505019418  | 6,434446889  | 0,070572529 |  |
| 200874_s_at  | MIR1292 /// NOP | 2,861566439  | 2,791007185  | 0,070559254 |  |
| 223411_at    | MIF4GD          | 1,814495998  | 1,743944487  | 0,070551511 |  |
| 235683_at    | SESN3           | 1,814495998  | 1,743944487  | 0,070551511 |  |
| 1555454_at   | LITAF           | -2,504600601 | -2,575129729 | 0,070529128 |  |
| 1557197_a_at | LGALS3          | -2,504600601 | -2,575129729 | 0,070529128 |  |
| 1557309_at   | DENND1B         | -2,504600601 | -2,575129729 | 0,070529128 |  |
| 1559412_at   | LINC00478       | -2,504600601 | -2,575129729 | 0,070529128 |  |
| 1560051_at   | -               | -2,504600601 | -2,575129729 | 0,070529128 |  |
| 1561027_at   | LOC646241       | -2,504600601 | -2,575129729 | 0,070529128 |  |
| 1561180_at   | -               | -2,504600601 | -2,575129729 | 0,070529128 |  |
| 1562791_at   | MYCBPAP         | -2,504600601 | -2,575129729 | 0,070529128 |  |
| 1562941_at   | -               | -2,504600601 | -2,575129729 | 0,070529128 |  |
| 1563420_at   | XG /// XGPY2    | -2,504600601 | -2,575129729 | 0,070529128 |  |
| 1564389_at   | -               | -2,504600601 | -2,575129729 | 0,070529128 |  |
| 1566442_at   | -               | -2,504600601 | -2,575129729 | 0,070529128 |  |
| 1569819_at   | PWRN1           | -2,504600601 | -2,575129729 | 0,070529128 |  |
| 206581_at    | BNC1            | -2,504600601 | -2,575129729 | 0,070529128 |  |
| 207261_at    | CNGA3           | -2,504600601 | -2,575129729 | 0,070529128 |  |
| 207655_s_at  | BLNK            | -2,504600601 | -2,575129729 | 0,070529128 |  |
| 211351_at    | KIF25-AS1       | -2,504600601 | -2,575129729 | 0,070529128 |  |
| 212328_at    | LIMCH1          | -2,504600601 | -2,575129729 | 0,070529128 |  |
| 213285_at    | TMEM30B         | -2,504600601 | -2,575129729 | 0,070529128 |  |
| 214586_at    | GPR37           | -2,504600601 | -2,575129729 | 0,070529128 |  |
| 215561_s_at  | IL1R1           | -2,504600601 | -2,575129729 | 0,070529128 |  |
| 227646_at    | EBF1            | -2,504600601 | -2,575129729 | 0,070529128 |  |
| 232252_at    | DUSP27          | -2,504600601 | -2,575129729 | 0,070529128 |  |
| 235599_at    | LOC339535       | -2,504600601 | -2,575129729 | 0,070529128 |  |
| 237898_at    | -               | -2,504600601 | -2,575129729 | 0,070529128 |  |

|              |                |              |              |             |  |
|--------------|----------------|--------------|--------------|-------------|--|
| 241272_at    | -              | -2,504600601 | -2,575129729 | 0,070529128 |  |
| 241463_at    | EIF2AK3        | -2,504600601 | -2,575129729 | 0,070529128 |  |
| 241890_at    | -              | -2,504600601 | -2,575129729 | 0,070529128 |  |
| 243655_x_at  | -              | -2,504600601 | -2,575129729 | 0,070529128 |  |
| 243935_at    | FRAS1          | -2,504600601 | -2,575129729 | 0,070529128 |  |
| 244009_at    | -              | -2,504600601 | -2,575129729 | 0,070529128 |  |
| 244105_at    | LOC100652840 / | -2,504600601 | -2,575129729 | 0,070529128 |  |
| 1569933_at   | -              | -0,089689931 | -0,160136748 | 0,070446817 |  |
| 205170_at    | STAT2          | -0,089689931 | -0,160136748 | 0,070446817 |  |
| 213247_at    | SVEP1          | -0,089689931 | -0,160136748 | 0,070446817 |  |
| 219997_s_at  | COPS7B         | 1,912238072  | 1,841838775  | 0,070399297 |  |
| 214383_x_at  | KLHDC3         | 3,668429488  | 3,598072942  | 0,070356546 |  |
| 223714_at    | ZNF256         | 1,820612054  | 1,750261389  | 0,070350665 |  |
| 205090_s_at  | NAGPA          | 1,373456798  | 1,303116084  | 0,070340714 |  |
| 214624_at    | UPK1A          | 0,917308734  | 0,847075464  | 0,07023327  |  |
| 225574_at    | RWDD4          | 3,377277984  | 3,307062282  | 0,070215702 |  |
| 209243_s_at  | PEG3           | 2,825526235  | 2,755336312  | 0,070189923 |  |
| 204819_at    | FGD1           | 0,503742507  | 0,433557298  | 0,070185209 |  |
| 205351_at    | GGCX           | 0,503742507  | 0,433557298  | 0,070185209 |  |
| 241741_at    | CRLS1          | 0,503742507  | 0,433557298  | 0,070185209 |  |
| 215792_s_at  | DNAJC11        | 2,44295215   | 2,372786857  | 0,070165292 |  |
| 209900_s_at  | SLC16A1        | 3,850569363  | 3,780418488  | 0,070150875 |  |
| 235210_s_at  | SBSPON         | 2,089851283  | 2,019703483  | 0,0701478   |  |
| 224709_s_at  | CDC42SE2       | 3,877221251  | 3,807174423  | 0,070046828 |  |
| 218116_at    | C9orf78        | 3,62365843   | 3,553617909  | 0,070040521 |  |
| 224535_s_at  | MRP63          | 3,62365843   | 3,553617909  | 0,070040521 |  |
| 1554224_at   | -              | -2,551294263 | -2,621331989 | 0,070037726 |  |
| 1557359_at   | LOC285758      | -2,551294263 | -2,621331989 | 0,070037726 |  |
| 1560021_at   | -              | -2,551294263 | -2,621331989 | 0,070037726 |  |
| 1560776_at   | -              | -2,551294263 | -2,621331989 | 0,070037726 |  |
| 1562311_at   | -              | -2,551294263 | -2,621331989 | 0,070037726 |  |
| 1563606_a_at | LOC286359      | -2,551294263 | -2,621331989 | 0,070037726 |  |
| 1564485_at   | LOC100131551   | -2,551294263 | -2,621331989 | 0,070037726 |  |
| 1566642_at   | -              | -2,551294263 | -2,621331989 | 0,070037726 |  |
| 1570411_at   | LOC100133131   | -2,551294263 | -2,621331989 | 0,070037726 |  |
| 211508_s_at  | GH2            | -2,551294263 | -2,621331989 | 0,070037726 |  |
| 213025_at    | THUMPD1        | -2,551294263 | -2,621331989 | 0,070037726 |  |
| 217387_at    | CAPN6          | -2,551294263 | -2,621331989 | 0,070037726 |  |
| 227949_at    | PHACTR3        | -2,551294263 | -2,621331989 | 0,070037726 |  |
| 230883_at    | NXPH2          | -2,551294263 | -2,621331989 | 0,070037726 |  |
| 231104_at    | TDRD5          | -2,551294263 | -2,621331989 | 0,070037726 |  |
| 231383_at    | -              | -2,551294263 | -2,621331989 | 0,070037726 |  |
| 234358_at    | -              | -2,551294263 | -2,621331989 | 0,070037726 |  |
| 234474_x_at  | IL6ST          | -2,551294263 | -2,621331989 | 0,070037726 |  |
| 234961_at    | -              | -2,551294263 | -2,621331989 | 0,070037726 |  |
| 236576_at    | -              | -2,551294263 | -2,621331989 | 0,070037726 |  |
| 239594_at    | LOC145837      | -2,551294263 | -2,621331989 | 0,070037726 |  |
| 240107_at    | -              | -2,551294263 | -2,621331989 | 0,070037726 |  |
| 240158_at    | -              | -2,551294263 | -2,621331989 | 0,070037726 |  |
| 240762_at    | -              | -2,551294263 | -2,621331989 | 0,070037726 |  |
| 241494_at    | -              | -2,551294263 | -2,621331989 | 0,070037726 |  |
| 242054_s_at  | SIX3           | -2,551294263 | -2,621331989 | 0,070037726 |  |
| 242520_s_at  | C1orf228       | -2,551294263 | -2,621331989 | 0,070037726 |  |
| 243013_at    | -              | -2,551294263 | -2,621331989 | 0,070037726 |  |
| 218412_s_at  | GTF2IRD1       | 1,62481334   | 1,55481039   | 0,07000295  |  |
| 1554586_a_at | RHOBTB2        | 0,246434561  | 0,176436073  | 0,069998488 |  |

|              |                  |              |              |             |
|--------------|------------------|--------------|--------------|-------------|
| 1558334_a_at | C22orf15         | 0,246434561  | 0,176436073  | 0,069998488 |
| 217192_s_at  | PRDM1            | 0,246434561  | 0,176436073  | 0,069998488 |
| 221251_x_at  | INO80B /// INO80 | 0,246434561  | 0,176436073  | 0,069998488 |
| 236629_at    | IBA57            | 0,246434561  | 0,176436073  | 0,069998488 |
| 209624_s_at  | MCCC2            | 2,094906514  | 2,024923328  | 0,069983186 |
| 1554245_x_at | ARL17A /// ARL1  | 1,247462054  | 1,177496821  | 0,069965233 |
| 1556582_at   | PVR              | 1,247462054  | 1,177496821  | 0,069965233 |
| 213608_s_at  | SRRD             | 3,62627949   | 3,556324192  | 0,069955298 |
| 237626_at    | -                | 1,512180019  | 1,442269454  | 0,069910565 |
| 223617_x_at  | ATAD3B           | 3,628024221  | 3,558125564  | 0,069898657 |
| 1556734_at   | -                | -0,496991414 | -0,566887459 | 0,069896046 |
| 1566821_at   | LOC100505862     | -0,496991414 | -0,566887459 | 0,069896046 |
| 206970_at    | CNTN2            | -0,496991414 | -0,566887459 | 0,069896046 |
| 207302_at    | SGCG             | -0,496991414 | -0,566887459 | 0,069896046 |
| 207787_at    | KRT33B           | -0,496991414 | -0,566887459 | 0,069896046 |
| 214704_at    | TCF25            | -0,496991414 | -0,566887459 | 0,069896046 |
| 243495_s_at  | ZNF652           | -0,496991414 | -0,566887459 | 0,069896046 |
| 225014_at    | C4orf52          | 3,655656719  | 3,585762986  | 0,069893733 |
| 218166_s_at  | RSF1             | 1,735773781  | 1,665902186  | 0,069871595 |
| 222979_s_at  | SURF4            | 4,389788927  | 4,319980141  | 0,069808786 |
| 208097_s_at  | TMX1             | 5,149552753  | 5,079744839  | 0,069807914 |
| 1554303_at   | HNMT             | -1,353583928 | -1,423348341 | 0,069764413 |
| 1555678_at   | ST3GAL3          | -1,353583928 | -1,423348341 | 0,069764413 |
| 1556779_s_at | -                | -1,353583928 | -1,423348341 | 0,069764413 |
| 1560154_a_at | -                | -1,353583928 | -1,423348341 | 0,069764413 |
| 1562831_a_at | WDR11-AS1        | -1,353583928 | -1,423348341 | 0,069764413 |
| 205023_at    | RAD51            | -1,353583928 | -1,423348341 | 0,069764413 |
| 210380_s_at  | CACNA1G          | -1,353583928 | -1,423348341 | 0,069764413 |
| 210506_at    | FUT7             | -1,353583928 | -1,423348341 | 0,069764413 |
| 214292_at    | ITGB4            | -1,353583928 | -1,423348341 | 0,069764413 |
| 217020_at    | RARB             | -1,353583928 | -1,423348341 | 0,069764413 |
| 230700_at    | RTN4RL1          | -1,353583928 | -1,423348341 | 0,069764413 |
| 233211_at    | MTBP             | -1,353583928 | -1,423348341 | 0,069764413 |
| 235430_at    | C14orf43         | -1,353583928 | -1,423348341 | 0,069764413 |
| 236452_at    | -                | -1,353583928 | -1,423348341 | 0,069764413 |
| 236687_at    | -                | -1,353583928 | -1,423348341 | 0,069764413 |
| 237611_at    | -                | -1,353583928 | -1,423348341 | 0,069764413 |
| 242104_at    | -                | -1,353583928 | -1,423348341 | 0,069764413 |
| 242941_x_at  | TBX1             | -1,353583928 | -1,423348341 | 0,069764413 |
| 200985_s_at  | CD59             | 3,63237684   | 3,562619178  | 0,069757661 |
| 224130_s_at  | SRA1             | 3,102740237  | 3,033010968  | 0,06972927  |
| 221064_s_at  | UNKL             | 0,934330293  | 0,864649967  | 0,069680326 |
| 228480_at    | VAPA             | 1,394109935  | 1,324440845  | 0,06966909  |
| 222664_at    | KCTD15           | 3,394805732  | 3,325159096  | 0,069646636 |
| 227964_at    | FRMD8            | 3,842326541  | 3,7726819    | 0,069644641 |
| 208002_s_at  | ACOT7            | 3,890364806  | 3,820743792  | 0,069621014 |
| 212689_s_at  | KDM3A            | 4,106641205  | 4,037037849  | 0,069603356 |
| 222633_at    | TBL1XR1          | 2,52764011   | 2,458228496  | 0,069411615 |
| 224675_at    | MESDC2           | 4,724639777  | 4,655247494  | 0,069392283 |
| 218340_s_at  | UBA6             | 3,191547726  | 3,122166354  | 0,069381372 |
| 200044_at    | GATC /// SRSF9   | 5,869070493  | 5,799709572  | 0,069360921 |
| 235037_at    | TMEM41A          | 3,266269388  | 3,196911138  | 0,06935825  |
| 201675_at    | AKAP1            | 3,115233629  | 3,045906378  | 0,069327251 |
| 238105_x_at  | WNT7B            | 0,945567441  | 0,876248481  | 0,06931896  |
| 202338_at    | TK1              | 3,193905507  | 3,124599694  | 0,069305813 |
| 224784_at    | MLLT6            | 1,269985355  | 1,200746069  | 0,069239285 |

|              |                |              |              |             |  |
|--------------|----------------|--------------|--------------|-------------|--|
| 1554755_a_at | MTUS2          | -1,308181863 | -1,377419394 | 0,069237531 |  |
| 1555569_a_at | KCTD7 /// RABG | -1,308181863 | -1,377419394 | 0,069237531 |  |
| 1561608_at   | -              | -1,308181863 | -1,377419394 | 0,069237531 |  |
| 1566609_at   | -              | -1,308181863 | -1,377419394 | 0,069237531 |  |
| 207092_at    | LEP            | -1,308181863 | -1,377419394 | 0,069237531 |  |
| 215042_at    | BMP6           | -1,308181863 | -1,377419394 | 0,069237531 |  |
| 215052_at    | FRMPD4         | -1,308181863 | -1,377419394 | 0,069237531 |  |
| 215433_at    | DPY19L1        | -1,308181863 | -1,377419394 | 0,069237531 |  |
| 220626_at    | SERPINA10      | -1,308181863 | -1,377419394 | 0,069237531 |  |
| 223757_at    | DIO3OS         | -1,308181863 | -1,377419394 | 0,069237531 |  |
| 230249_at    | KHDRBS3        | -1,308181863 | -1,377419394 | 0,069237531 |  |
| 231286_at    | C9orf47        | -1,308181863 | -1,377419394 | 0,069237531 |  |
| 233777_at    | -              | -1,308181863 | -1,377419394 | 0,069237531 |  |
| 234153_at    | -              | -1,308181863 | -1,377419394 | 0,069237531 |  |
| 239157_at    | ZSCAN12P1      | -1,308181863 | -1,377419394 | 0,069237531 |  |
| 240116_at    | -              | -1,308181863 | -1,377419394 | 0,069237531 |  |
| 241050_at    | -              | -1,308181863 | -1,377419394 | 0,069237531 |  |
| 205667_at    | WRN            | 3,782486091  | 3,713295978  | 0,069190113 |  |
| 53968_at     | INTS5          | 2,705896113  | 2,636751089  | 0,069145024 |  |
| 203311_s_at  | ARF6           | 3,536237877  | 3,467101363  | 0,069136514 |  |
| 1554559_at   | GPR62          | 0,273439642  | 0,204310755  | 0,069128887 |  |
| 1568627_at   | SMEK2          | 0,273439642  | 0,204310755  | 0,069128887 |  |
| 1569150_x_at | PDLIM7         | 0,273439642  | 0,204310755  | 0,069128887 |  |
| 221421_s_at  | ADAMTS12       | 0,273439642  | 0,204310755  | 0,069128887 |  |
| 234554_at    | KCNK16         | 0,273439642  | 0,204310755  | 0,069128887 |  |
| 218350_s_at  | GMNN           | 5,878079008  | 5,809005963  | 0,069073045 |  |
| 218560_s_at  | JMJD4          | 0,760715727  | 0,691645685  | 0,069070041 |  |
| 227382_at    | CYB5B          | 0,760715727  | 0,691645685  | 0,069070041 |  |
| 202826_at    | SPINT1         | -0,467091869 | -0,536087151 | 0,068995282 |  |
| 212822_at    | HEG1           | -0,467091869 | -0,536087151 | 0,068995282 |  |
| 215232_at    | ARHGAP44       | -0,467091869 | -0,536087151 | 0,068995282 |  |
| 205273_s_at  | PITRM1         | 3,604290432  | 3,535445117  | 0,068845315 |  |
| 1553797_a_at | LOC100652811 / | -2,667025278 | -2,735862426 | 0,068837148 |  |
| 1557538_at   | -              | -2,667025278 | -2,735862426 | 0,068837148 |  |
| 1557914_s_at | ERVFH21-1      | -2,667025278 | -2,735862426 | 0,068837148 |  |
| 1562337_at   | OR7D2          | -2,667025278 | -2,735862426 | 0,068837148 |  |
| 1562365_at   | LOC286177      | -2,667025278 | -2,735862426 | 0,068837148 |  |
| 1563128_at   | -              | -2,667025278 | -2,735862426 | 0,068837148 |  |
| 1565546_at   | RNF141         | -2,667025278 | -2,735862426 | 0,068837148 |  |
| 1565810_at   | -              | -2,667025278 | -2,735862426 | 0,068837148 |  |
| 1570284_x_at | -              | -2,667025278 | -2,735862426 | 0,068837148 |  |
| 1570422_at   | SNTG2          | -2,667025278 | -2,735862426 | 0,068837148 |  |
| 202833_s_at  | SERPINA1       | -2,667025278 | -2,735862426 | 0,068837148 |  |
| 208088_s_at  | CFHR5          | -2,667025278 | -2,735862426 | 0,068837148 |  |
| 211776_s_at  | EPB41L3        | -2,667025278 | -2,735862426 | 0,068837148 |  |
| 214932_at    | KIDINS220      | -2,667025278 | -2,735862426 | 0,068837148 |  |
| 215626_at    | -              | -2,667025278 | -2,735862426 | 0,068837148 |  |
| 220540_at    | KCNK15         | -2,667025278 | -2,735862426 | 0,068837148 |  |
| 221872_at    | RARRES1        | -2,667025278 | -2,735862426 | 0,068837148 |  |
| 229695_at    | -              | -2,667025278 | -2,735862426 | 0,068837148 |  |
| 231098_at    | -              | -2,667025278 | -2,735862426 | 0,068837148 |  |
| 232261_at    | -              | -2,667025278 | -2,735862426 | 0,068837148 |  |
| 235746_s_at  | PLA2R1         | -2,667025278 | -2,735862426 | 0,068837148 |  |
| 240053_x_at  | PEX5L          | -2,667025278 | -2,735862426 | 0,068837148 |  |
| 240088_at    | PDE5A          | -2,667025278 | -2,735862426 | 0,068837148 |  |
| 241026_at    | -              | -2,667025278 | -2,735862426 | 0,068837148 |  |

|              |                 |              |              |             |  |
|--------------|-----------------|--------------|--------------|-------------|--|
| 242643_x_at  | -               | -2,667025278 | -2,735862426 | 0,068837148 |  |
| 235536_at    | SNORD89         | 1,283332461  | 1,214517879  | 0,068814582 |  |
| 203544_s_at  | STAM            | 3,423218668  | 3,354479478  | 0,068739191 |  |
| 201493_s_at  | PUM2            | 4,175069494  | 4,106388091  | 0,068681403 |  |
| 1552355_s_at | C19orf26        | -0,033456564 | -0,102100538 | 0,068643973 |  |
| 1569426_at   | -               | -0,033456564 | -0,102100538 | 0,068643973 |  |
| 203601_s_at  | ZBTB17          | -0,033456564 | -0,102100538 | 0,068643973 |  |
| 207892_at    | CD40LG          | -0,033456564 | -0,102100538 | 0,068643973 |  |
| 211232_x_at  | GLP1R           | -0,033456564 | -0,102100538 | 0,068643973 |  |
| 216980_s_at  | SPN             | -0,033456564 | -0,102100538 | 0,068643973 |  |
| 221407_at    | GJD2            | -0,033456564 | -0,102100538 | 0,068643973 |  |
| 219335_at    | ARMCX5          | 1,874520207  | 1,805902329  | 0,068617877 |  |
| 202002_at    | ACAA2           | 0,291166226  | 0,222599095  | 0,068567131 |  |
| 215908_at    | -               | 0,291166226  | 0,222599095  | 0,068567131 |  |
| 224356_x_at  | MS4A6A          | 0,291166226  | 0,222599095  | 0,068567131 |  |
| 239939_at    | -               | 0,291166226  | 0,222599095  | 0,068567131 |  |
| 221764_at    | R3HDM4          | 2,923969333  | 2,855418981  | 0,068550353 |  |
| 202512_s_at  | ATG5            | 1,292162421  | 1,223626587  | 0,068535833 |  |
| 220768_s_at  | CSNK1G3         | 3,101484927  | 3,033010968  | 0,068473959 |  |
| 220547_s_at  | FAM35A          | 4,972732044  | 4,904274741  | 0,068457303 |  |
| 221483_s_at  | ARPP19          | 5,154100714  | 5,085689237  | 0,068411478 |  |
| 209868_s_at  | RBMS1           | 2,061726373  | 1,993317152  | 0,068409221 |  |
| 212150_at    | EFR3A           | 3,647078281  | 3,578681277  | 0,068397004 |  |
| 219137_s_at  | MFF             | 2,782308844  | 2,713921281  | 0,068387563 |  |
| 222841_s_at  | TIMM22          | 2,882181479  | 2,813804482  | 0,068376996 |  |
| 206837_at    | ALX1            | 1,67631007   | 1,60795124   | 0,068358831 |  |
| 1553622_a_at | FSIP1           | -2,712026959 | -2,780313924 | 0,068286965 |  |
| 1553851_at   | SPIC            | -2,712026959 | -2,780313924 | 0,068286965 |  |
| 1554781_at   | MGC32805        | -2,712026959 | -2,780313924 | 0,068286965 |  |
| 1556666_a_at | LOC100652860 /  | -2,712026959 | -2,780313924 | 0,068286965 |  |
| 1557778_at   | -               | -2,712026959 | -2,780313924 | 0,068286965 |  |
| 1559077_at   | ABI3BP          | -2,712026959 | -2,780313924 | 0,068286965 |  |
| 1560018_at   | ARPP21          | -2,712026959 | -2,780313924 | 0,068286965 |  |
| 1560848_at   | -               | -2,712026959 | -2,780313924 | 0,068286965 |  |
| 1561899_at   | CLECL1          | -2,712026959 | -2,780313924 | 0,068286965 |  |
| 1562670_at   | -               | -2,712026959 | -2,780313924 | 0,068286965 |  |
| 1562879_at   | -               | -2,712026959 | -2,780313924 | 0,068286965 |  |
| 1569675_at   | POU2AF1         | -2,712026959 | -2,780313924 | 0,068286965 |  |
| 1569942_at   | -               | -2,712026959 | -2,780313924 | 0,068286965 |  |
| 1570039_at   | TMSB15A /// TMS | -2,712026959 | -2,780313924 | 0,068286965 |  |
| 211412_at    | PADI4           | -2,712026959 | -2,780313924 | 0,068286965 |  |
| 214615_at    | P2RY10          | -2,712026959 | -2,780313924 | 0,068286965 |  |
| 215586_at    | -               | -2,712026959 | -2,780313924 | 0,068286965 |  |
| 215911_x_at  | ATP2B3          | -2,712026959 | -2,780313924 | 0,068286965 |  |
| 216244_at    | IL1RN           | -2,712026959 | -2,780313924 | 0,068286965 |  |
| 219840_s_at  | TCL6            | -2,712026959 | -2,780313924 | 0,068286965 |  |
| 222951_s_at  | ANKRD5          | -2,712026959 | -2,780313924 | 0,068286965 |  |
| 224354_at    | -               | -2,712026959 | -2,780313924 | 0,068286965 |  |
| 231490_at    | -               | -2,712026959 | -2,780313924 | 0,068286965 |  |
| 233282_at    | -               | -2,712026959 | -2,780313924 | 0,068286965 |  |
| 235351_at    | -               | -2,712026959 | -2,780313924 | 0,068286965 |  |
| 236297_at    | -               | -2,712026959 | -2,780313924 | 0,068286965 |  |
| 241821_at    | -               | -2,712026959 | -2,780313924 | 0,068286965 |  |
| 243697_at    | MOXD1           | -2,712026959 | -2,780313924 | 0,068286965 |  |
| 244066_at    | -               | -2,712026959 | -2,780313924 | 0,068286965 |  |
| 244553_at    | HOTTIP          | -2,712026959 | -2,780313924 | 0,068286965 |  |



|              |                 |              |              |             |  |
|--------------|-----------------|--------------|--------------|-------------|--|
| 202782_s_at  | INPP5K          | 1,567778694  | 1,499637023  | 0,068141671 |  |
| 216483_s_at  | C19orf10        | 3,232262672  | 3,164168347  | 0,068094324 |  |
| 242922_at    | NOMO3           | 0,792179257  | 0,724100169  | 0,068079088 |  |
| 202164_s_at  | CNOT8           | 3,685285822  | 3,617207412  | 0,06807841  |  |
| 1559051_s_at | MB21D1          | 1,446464021  | 1,378453643  | 0,068010377 |  |
| 208635_x_at  | NACA            | 7,54900834   | 7,481078695  | 0,067929645 |  |
| 200642_at    | SOD1            | 7,137176564  | 7,069257481  | 0,067919083 |  |
| 215994_x_at  | TBC1D9B         | 1,575032557  | 1,507116528  | 0,067916029 |  |
| 205085_at    | ORC1            | 1,990274687  | 1,922365006  | 0,067909681 |  |
| 201153_s_at  | MBNL1           | 5,200568591  | 5,132684978  | 0,067883614 |  |
| 203671_at    | TPMT            | 1,314003737  | 1,246149888  | 0,067853848 |  |
| 218620_s_at  | HEMK1           | 1,69307511   | 1,6252386    | 0,06783651  |  |
| 201538_s_at  | DUSP3           | 0,317354302  | 0,249604176  | 0,067750126 |  |
| 203761_at    | SLA             | -0,423248115 | -0,490927335 | 0,06767922  |  |
| 203768_s_at  | STS             | -0,423248115 | -0,490927335 | 0,06767922  |  |
| 206705_at    | TULP1           | -0,423248115 | -0,490927335 | 0,06767922  |  |
| 210248_at    | WNT7A           | -0,423248115 | -0,490927335 | 0,06767922  |  |
| 211864_s_at  | MYOF            | -0,423248115 | -0,490927335 | 0,06767922  |  |
| 213467_at    | RND2            | -0,423248115 | -0,490927335 | 0,06767922  |  |
| 217231_s_at  | MAST1           | -0,423248115 | -0,490927335 | 0,06767922  |  |
| 221016_s_at  | TCF7L1          | -0,423248115 | -0,490927335 | 0,06767922  |  |
| 221602_s_at  | FAIM3           | -0,423248115 | -0,490927335 | 0,06767922  |  |
| 222355_at    | -               | -0,423248115 | -0,490927335 | 0,06767922  |  |
| 229276_at    | IGSF9           | -0,423248115 | -0,490927335 | 0,06767922  |  |
| 229840_at    | IQSEC2          | -0,423248115 | -0,490927335 | 0,06767922  |  |
| 227373_at    | ATXN1L          | 2,952099138  | 2,884425449  | 0,067673689 |  |
| 1553641_a_at | TSGA13          | -1,196375121 | -1,264005341 | 0,067630219 |  |
| 1555852_at   | LOC100507463    | -1,196375121 | -1,264005341 | 0,067630219 |  |
| 1558631_at   | PPARA           | -1,196375121 | -1,264005341 | 0,067630219 |  |
| 1558773_s_at | RANBP10         | -1,196375121 | -1,264005341 | 0,067630219 |  |
| 1561065_at   | -               | -1,196375121 | -1,264005341 | 0,067630219 |  |
| 1563597_at   | -               | -1,196375121 | -1,264005341 | 0,067630219 |  |
| 1564733_at   | -               | -1,196375121 | -1,264005341 | 0,067630219 |  |
| 207135_at    | HTR2A           | -1,196375121 | -1,264005341 | 0,067630219 |  |
| 207755_at    | -               | -1,196375121 | -1,264005341 | 0,067630219 |  |
| 234042_at    | TAS2R43 /// TAS | -1,196375121 | -1,264005341 | 0,067630219 |  |
| 234649_at    | -               | -1,196375121 | -1,264005341 | 0,067630219 |  |
| 236828_at    | -               | -1,196375121 | -1,264005341 | 0,067630219 |  |
| 237155_at    | LOC100506502    | -1,196375121 | -1,264005341 | 0,067630219 |  |
| 239597_at    | -               | -1,196375121 | -1,264005341 | 0,067630219 |  |
| 240119_at    | TEPP            | -1,196375121 | -1,264005341 | 0,067630219 |  |
| 242246_x_at  | MEG3            | -1,196375121 | -1,264005341 | 0,067630219 |  |
| 210973_s_at  | FGFR1           | 1,000476627  | 0,932882274  | 0,067594353 |  |
| 221896_s_at  | HIGD1A          | 5,772203495  | 5,704616451  | 0,067587043 |  |
| 206494_s_at  | ITGA2B          | 1,58584542   | 1,518263577  | 0,067581843 |  |
| 206397_x_at  | CERS1 /// GDF1  | 2,171078719  | 2,103505212  | 0,067573507 |  |
| 1554301_at   | LHFPL3-AS1      | -2,779459409 | -2,847001814 | 0,067542406 |  |
| 1556954_at   | LOC283854       | -2,779459409 | -2,847001814 | 0,067542406 |  |
| 1559333_at   | SRGAP3-AS2      | -2,779459409 | -2,847001814 | 0,067542406 |  |
| 1569241_a_at | ZNF93           | -2,779459409 | -2,847001814 | 0,067542406 |  |
| 1570021_at   | -               | -2,779459409 | -2,847001814 | 0,067542406 |  |
| 206378_at    | SCGB2A2         | -2,779459409 | -2,847001814 | 0,067542406 |  |
| 219687_at    | HHAT            | -2,779459409 | -2,847001814 | 0,067542406 |  |
| 222379_at    | KCNE4           | -2,779459409 | -2,847001814 | 0,067542406 |  |
| 222950_at    | NIPAL2          | -2,779459409 | -2,847001814 | 0,067542406 |  |
| 223618_at    | FMN2            | -2,779459409 | -2,847001814 | 0,067542406 |  |

|              |              |              |              |             |  |
|--------------|--------------|--------------|--------------|-------------|--|
| 228441_s_at  | -            | -2,779459409 | -2,847001814 | 0,067542406 |  |
| 232817_at    | -            | -2,779459409 | -2,847001814 | 0,067542406 |  |
| 234420_at    | PIH2         | -2,779459409 | -2,847001814 | 0,067542406 |  |
| 235481_at    | COMMD10      | -2,779459409 | -2,847001814 | 0,067542406 |  |
| 235489_at    | RHOJ         | -2,779459409 | -2,847001814 | 0,067542406 |  |
| 241271_at    | -            | -2,779459409 | -2,847001814 | 0,067542406 |  |
| 242703_at    | -            | -2,779459409 | -2,847001814 | 0,067542406 |  |
| 243424_at    | -            | -2,779459409 | -2,847001814 | 0,067542406 |  |
| 223037_at    | PDZD11       | 3,702775533  | 3,635238397  | 0,067537136 |  |
| 202464_s_at  | PFKFB3       | 3,251631457  | 3,184136378  | 0,067495079 |  |
| 226580_at    | BRMS1L       | 2,64946283   | 2,582026171  | 0,067436658 |  |
| 213588_x_at  | RPL14        | 7,549382416  | 7,481968578  | 0,067413838 |  |
| 217948_at    | FAM127B      | 1,46610492   | 1,398700978  | 0,067403942 |  |
| 209257_s_at  | SMC3         | 1,709647566  | 1,642321262  | 0,067326303 |  |
| 211139_s_at  | NAB1         | 1,709647566  | 1,642321262  | 0,067326303 |  |
| 226329_s_at  | MITD1        | 3,964046478  | 3,896739828  | 0,06730665  |  |
| 209180_at    | RABGGTB      | 4,05440026   | 3,987098381  | 0,067301879 |  |
| 34221_at     | HMGXB3       | 2,436992838  | 2,369713036  | 0,067279802 |  |
| 242073_at    | -            | 1,917954284  | 1,85068474   | 0,067269544 |  |
| 223649_s_at  | SLC25A39     | 3,220746604  | 3,153484076  | 0,067262528 |  |
| 219365_s_at  | CAMKV        | 0,334552598  | 0,26733076   | 0,067221839 |  |
| 224281_s_at  | NGRN         | 3,142344098  | 3,075135559  | 0,067208539 |  |
| 224410_s_at  | LMBR1        | 3,472604685  | 3,405399563  | 0,067205121 |  |
| 214544_s_at  | SNAP23       | 3,657366303  | 3,590171466  | 0,067194837 |  |
| 218711_s_at  | SDPR         | 3,506195778  | 3,439026336  | 0,067169442 |  |
| 209653_at    | KPNA4        | 2,342392905  | 2,275409734  | 0,066983171 |  |
| 1562263_at   | LOC100507156 | 0,020670649  | -0,046302147 | 0,066972796 |  |
| 210241_s_at  | TP53TG1      | 0,020670649  | -0,046302147 | 0,066972796 |  |
| 218416_s_at  | SLC48A1      | 0,020670649  | -0,046302147 | 0,066972796 |  |
| 240837_at    | FNDC7        | 0,020670649  | -0,046302147 | 0,066972796 |  |
| 1555244_at   | LOC554207    | -2,823166348 | -2,89013181  | 0,066965462 |  |
| 1555356_a_at | SCML4        | -2,823166348 | -2,89013181  | 0,066965462 |  |
| 1557133_at   | RP1-177G6.2  | -2,823166348 | -2,89013181  | 0,066965462 |  |
| 1561200_at   | VWA3B        | -2,823166348 | -2,89013181  | 0,066965462 |  |
| 1562193_at   | -            | -2,823166348 | -2,89013181  | 0,066965462 |  |
| 1562398_at   | -            | -2,823166348 | -2,89013181  | 0,066965462 |  |
| 1563899_at   | LCTL         | -2,823166348 | -2,89013181  | 0,066965462 |  |
| 1565837_at   | -            | -2,823166348 | -2,89013181  | 0,066965462 |  |
| 1569323_at   | PTPRG        | -2,823166348 | -2,89013181  | 0,066965462 |  |
| 1569831_at   | -            | -2,823166348 | -2,89013181  | 0,066965462 |  |
| 205767_at    | EREG         | -2,823166348 | -2,89013181  | 0,066965462 |  |
| 207638_at    | TMPRSS15     | -2,823166348 | -2,89013181  | 0,066965462 |  |
| 214942_at    | RBM34        | -2,823166348 | -2,89013181  | 0,066965462 |  |
| 233828_at    | -            | -2,823166348 | -2,89013181  | 0,066965462 |  |
| 237597_at    | LOC100507525 | -2,823166348 | -2,89013181  | 0,066965462 |  |
| 237802_at    | XKR4         | -2,823166348 | -2,89013181  | 0,066965462 |  |
| 237911_at    | -            | -2,823166348 | -2,89013181  | 0,066965462 |  |
| 238073_at    | ELAVL4       | -2,823166348 | -2,89013181  | 0,066965462 |  |
| 240386_at    | -            | -2,823166348 | -2,89013181  | 0,066965462 |  |
| 241590_at    | -            | -2,823166348 | -2,89013181  | 0,066965462 |  |
| 244173_at    | MIS18BP1     | -2,823166348 | -2,89013181  | 0,066965462 |  |
| 217933_s_at  | LAP3         | 4,977187694  | 4,91028116   | 0,066906535 |  |
| 212341_at    | YIPF6        | 4,328338611  | 4,261479522  | 0,066859089 |  |
| 217770_at    | PIGT         | 3,609598452  | 3,542741726  | 0,066856726 |  |
| 1553239_at   | FAM124A      | -0,394749123 | -0,461594427 | 0,066845303 |  |
| 204149_s_at  | GSTM4        | -0,394749123 | -0,461594427 | 0,066845303 |  |

|              |                |              |              |             |  |
|--------------|----------------|--------------|--------------|-------------|--|
| 208333_at    | LHX5           | -0,394749123 | -0,461594427 | 0,066845303 |  |
| 210677_at    | SOAT2          | -0,394749123 | -0,461594427 | 0,066845303 |  |
| 223832_s_at  | CAPNS2         | -0,394749123 | -0,461594427 | 0,066845303 |  |
| 230245_s_at  | LOC283663      | -0,394749123 | -0,461594427 | 0,066845303 |  |
| 234356_at    | DKFZP434K028   | -0,394749123 | -0,461594427 | 0,066845303 |  |
| 235756_at    | -              | -0,394749123 | -0,461594427 | 0,066845303 |  |
| 209455_at    | FBXW11         | 3,234554895  | 3,16771226   | 0,066842635 |  |
| 225028_at    | LOC550643      | 1,726031811  | 1,659204017  | 0,066827794 |  |
| 202171_at    | VEZF1          | 2,669932407  | 2,603119255  | 0,066813152 |  |
| 221223_x_at  | CISH           | 1,027166904  | 0,960386719  | 0,066780185 |  |
| 222511_x_at  | FAF1           | 1,027166904  | 0,960386719  | 0,066780185 |  |
| 202696_at    | OXSRI          | 3,700289946  | 3,633530837  | 0,06675911  |  |
| 46167_at     | HEATR8 /// HEA | 3,910933598  | 3,84418735   | 0,066746248 |  |
| 210453_x_at  | ATP5L          | 6,826988486  | 6,760273516  | 0,06671497  |  |
| 216883_x_at  | PDE6D          | 3,316904202  | 3,250254796  | 0,066649405 |  |
| 204372_s_at  | KHSRP          | 4,372199749  | 4,305575871  | 0,066623878 |  |
| 1557905_s_at | CD44           | 2,11992033   | 2,053299695  | 0,066620634 |  |
| 200959_at    | FUS            | 5,354716535  | 5,288105861  | 0,066610674 |  |
| 200876_s_at  | PSMB1          | 6,923471608  | 6,856919273  | 0,066552335 |  |
| 232309_at    | LOC202181      | 0,359971644  | 0,293518836  | 0,066452808 |  |
| 235949_at    | TTC26          | 0,359971644  | 0,293518836  | 0,066452808 |  |
| 201425_at    | ALDH2          | 1,210676994  | 1,144305291  | 0,066371703 |  |
| 216985_s_at  | STX3           | 1,210676994  | 1,144305291  | 0,066371703 |  |
| 224779_s_at  | FAM96A         | 5,47349744   | 5,40731921   | 0,06617823  |  |
| 228014_at    | PTRH1          | 1,369290453  | 1,303116084  | 0,066174368 |  |
| 224522_s_at  | DCAKD          | 1,954567604  | 1,888402606  | 0,066164998 |  |
| 221437_s_at  | MRPS15         | 3,36999832   | 3,303845028  | 0,066153292 |  |
| 212160_at    | XPOT           | 4,618940011  | 4,552816898  | 0,066123114 |  |
| 201172_x_at  | ATP6V0E1       | 5,209918231  | 5,143823736  | 0,066094494 |  |
| 201757_at    | NDUFS5         | 6,862436922  | 6,79634875   | 0,066088171 |  |
| 227307_at    | TSPAN18        | 1,751865623  | 1,685812099  | 0,066053523 |  |
| 1555238_at   | PTH2           | 1,05337236   | 0,987376598  | 0,065995762 |  |
| 202991_at    | STARD3         | 1,05337236   | 0,987376598  | 0,065995762 |  |
| 223240_at    | FBXO8          | 1,515954005  | 1,450051551  | 0,065902454 |  |
| 200024_at    | RPS5           | 7,883095607  | 7,817193884  | 0,065901723 |  |
| 1552854_a_at | VWA5B1         | -1,089016378 | -1,154897679 | 0,065881301 |  |
| 1559759_at   | KIFC3          | -1,089016378 | -1,154897679 | 0,065881301 |  |
| 1563042_at   | LOC338694      | -1,089016378 | -1,154897679 | 0,065881301 |  |
| 202454_s_at  | ERBB3          | -1,089016378 | -1,154897679 | 0,065881301 |  |
| 206724_at    | CBX4           | -1,089016378 | -1,154897679 | 0,065881301 |  |
| 215623_x_at  | SMC4           | -1,089016378 | -1,154897679 | 0,065881301 |  |
| 225355_at    | NEURL1B        | -1,089016378 | -1,154897679 | 0,065881301 |  |
| 227130_s_at  | TLE1           | -1,089016378 | -1,154897679 | 0,065881301 |  |
| 228887_x_at  | CCDC61         | -1,089016378 | -1,154897679 | 0,065881301 |  |
| 231640_at    | -              | -1,089016378 | -1,154897679 | 0,065881301 |  |
| 232009_at    | EMR2           | -1,089016378 | -1,154897679 | 0,065881301 |  |
| 233044_at    | -              | -1,089016378 | -1,154897679 | 0,065881301 |  |
| 234157_at    | -              | -1,089016378 | -1,154897679 | 0,065881301 |  |
| 234552_at    | EPPK1          | -1,089016378 | -1,154897679 | 0,065881301 |  |
| 236231_at    | ZNF271         | -1,089016378 | -1,154897679 | 0,065881301 |  |
| 238946_at    | -              | -1,089016378 | -1,154897679 | 0,065881301 |  |
| 239046_at    | -              | -1,089016378 | -1,154897679 | 0,065881301 |  |
| 239534_at    | -              | -1,089016378 | -1,154897679 | 0,065881301 |  |
| 239773_at    | GTPBP10        | -1,089016378 | -1,154897679 | 0,065881301 |  |
| 239964_at    | TCL6           | -1,089016378 | -1,154897679 | 0,065881301 |  |
| 240243_at    | -              | -1,089016378 | -1,154897679 | 0,065881301 |  |

|              |                  |              |              |             |  |
|--------------|------------------|--------------|--------------|-------------|--|
| 216241_s_at  | TCEA1            | 6,439155183  | 6,373284962  | 0,065870221 |  |
| 201404_x_at  | PSMB2            | 1,965648824  | 1,899812471  | 0,065836353 |  |
| 213358_at    | SOGA2            | 1,381753566  | 1,315948728  | 0,065804838 |  |
| 227262_at    | HAPLN3           | 1,381753566  | 1,315948728  | 0,065804838 |  |
| 228809_at    | CXorf40A /// CXo | 1,381753566  | 1,315948728  | 0,065804838 |  |
| 237188_x_at  | SUN5             | 1,381753566  | 1,315948728  | 0,065804838 |  |
| 225647_s_at  | CTSC             | 3,48613512   | 3,420331607  | 0,065803513 |  |
| 225082_at    | CPSF3            | 4,418803905  | 4,353041151  | 0,065762754 |  |
| 207243_s_at  | CALM1 /// CALM   | 7,092224248  | 7,026551816  | 0,065672432 |  |
| 226243_at    | PTRHD1           | 4,524682985  | 4,459038     | 0,065644985 |  |
| 201972_at    | ATP6V1A          | 4,752099177  | 4,686464402  | 0,065634775 |  |
| 1556034_s_at | MTMR11           | -0,352951799 | -0,41858459  | 0,065632791 |  |
| 216061_x_at  | PDGFB            | -0,352951799 | -0,41858459  | 0,065632791 |  |
| 216493_s_at  | IGF2BP3          | -0,352951799 | -0,41858459  | 0,065632791 |  |
| 237350_at    | TTC36            | -0,352951799 | -0,41858459  | 0,065632791 |  |
| 241974_at    | -                | -0,352951799 | -0,41858459  | 0,065632791 |  |
| 204092_s_at  | AURKA            | 5,043076031  | 4,97744706   | 0,065628971 |  |
| 212229_s_at  | FBXO21           | 2,314494121  | 2,248887791  | 0,06560633  |  |
| 1556096_s_at | UNC13C           | -2,930741289 | -2,996335703 | 0,065594414 |  |
| 1557895_at   | FLJ35934         | -2,930741289 | -2,996335703 | 0,065594414 |  |
| 1562491_at   | -                | -2,930741289 | -2,996335703 | 0,065594414 |  |
| 1563465_at   | PKD1L1           | -2,930741289 | -2,996335703 | 0,065594414 |  |
| 1564707_x_at | GLS2             | -2,930741289 | -2,996335703 | 0,065594414 |  |
| 1565873_at   | -                | -2,930741289 | -2,996335703 | 0,065594414 |  |
| 1566428_at   | -                | -2,930741289 | -2,996335703 | 0,065594414 |  |
| 1569783_at   | LRRD1            | -2,930741289 | -2,996335703 | 0,065594414 |  |
| 1570023_at   | -                | -2,930741289 | -2,996335703 | 0,065594414 |  |
| 1570141_at   | MYO5B            | -2,930741289 | -2,996335703 | 0,065594414 |  |
| 203170_at    | RRP8             | -2,930741289 | -2,996335703 | 0,065594414 |  |
| 207875_at    | -                | -2,930741289 | -2,996335703 | 0,065594414 |  |
| 209348_s_at  | MAF              | -2,930741289 | -2,996335703 | 0,065594414 |  |
| 211149_at    | UTY              | -2,930741289 | -2,996335703 | 0,065594414 |  |
| 216030_s_at  | SEMG2            | -2,930741289 | -2,996335703 | 0,065594414 |  |
| 216731_s_at  | -                | -2,930741289 | -2,996335703 | 0,065594414 |  |
| 221153_s_at  | -                | -2,930741289 | -2,996335703 | 0,065594414 |  |
| 221933_at    | NLGN4X           | -2,930741289 | -2,996335703 | 0,065594414 |  |
| 223863_at    | WDR26            | -2,930741289 | -2,996335703 | 0,065594414 |  |
| 232383_at    | TFEC             | -2,930741289 | -2,996335703 | 0,065594414 |  |
| 233372_at    | -                | -2,930741289 | -2,996335703 | 0,065594414 |  |
| 233744_at    | -                | -2,930741289 | -2,996335703 | 0,065594414 |  |
| 237225_at    | ZFY-AS1          | -2,930741289 | -2,996335703 | 0,065594414 |  |
| 237649_at    | COPS4            | -2,930741289 | -2,996335703 | 0,065594414 |  |
| 240204_at    | LOC100506948 /   | -2,930741289 | -2,996335703 | 0,065594414 |  |
| 241264_at    | -                | -2,930741289 | -2,996335703 | 0,065594414 |  |
| 203257_s_at  | C11orf49         | 1,973904239  | 1,908311039  | 0,065593199 |  |
| 222765_x_at  | ESF1             | 1,973904239  | 1,908311039  | 0,065593199 |  |
| 228301_x_at  | NDUFB10          | 4,133297997  | 4,067710529  | 0,065587468 |  |
| 201076_at    | NHP2L1           | 4,196980309  | 4,131407181  | 0,065573127 |  |
| 231925_at    | -                | 3,952952896  | 3,887456383  | 0,065496513 |  |
| 226833_at    | CYB5D1           | 2,59519831   | 2,529740643  | 0,065457667 |  |
| 242077_x_at  | MB21D1           | 0,072842263  | 0,007421914  | 0,065420349 |  |
| 208716_s_at  | TMCO1            | 5,34068725   | 5,275295809  | 0,065391442 |  |
| 201180_s_at  | GNAI3            | 5,682492619  | 5,617138029  | 0,06535459  |  |
| 226943_at    | C12orf73         | 2,886560922  | 2,821324225  | 0,065236697 |  |
| 212656_at    | TSFM             | 3,807337009  | 3,742106442  | 0,065230567 |  |
| 1556056_at   | SIK2             | 0,401366113  | 0,336136178  | 0,065229935 |  |

|              |                 |              |              |             |  |
|--------------|-----------------|--------------|--------------|-------------|--|
| 230807_at    | CCDC151         | 0,401366113  | 0,336136178  | 0,065229935 |  |
| 231808_at    | OIP5-AS1        | 3,123915073  | 3,058687544  | 0,065227529 |  |
| 222615_s_at  | LOC100630923 /  | 1,40228911   | 1,337086025  | 0,065203085 |  |
| 1556899_at   | PRMT5-AS1       | -1,047650486 | -1,112851844 | 0,065201358 |  |
| 1558712_at   | TMEM134         | -1,047650486 | -1,112851844 | 0,065201358 |  |
| 1566157_x_at | -               | -1,047650486 | -1,112851844 | 0,065201358 |  |
| 203398_s_at  | GALNT3          | -1,047650486 | -1,112851844 | 0,065201358 |  |
| 207183_at    | GPR19           | -1,047650486 | -1,112851844 | 0,065201358 |  |
| 210742_at    | CDC14A          | -1,047650486 | -1,112851844 | 0,065201358 |  |
| 217217_at    | IGHA1 /// IGHA2 | -1,047650486 | -1,112851844 | 0,065201358 |  |
| 220711_at    | -               | -1,047650486 | -1,112851844 | 0,065201358 |  |
| 238320_at    | LOC100653017 /  | -1,047650486 | -1,112851844 | 0,065201358 |  |
| 242736_at    | -               | -1,047650486 | -1,112851844 | 0,065201358 |  |
| 201038_s_at  | ANP32A          | 4,105389286  | 4,040263518  | 0,065125768 |  |
| 53076_at     | B4GALT7         | 0,891393815  | 0,826297576  | 0,065096239 |  |
| 236192_at    | HOOK3           | 2,084778276  | 2,019703483  | 0,065074794 |  |
| 204514_at    | DPH2            | 2,406821352  | 2,341749893  | 0,06507146  |  |
| 1553646_at   | HDX             | -2,972500237 | -3,037500868 | 0,065000632 |  |
| 1555778_a_at | POSTN           | -2,972500237 | -3,037500868 | 0,065000632 |  |
| 1557181_s_at | C11orf87        | -2,972500237 | -3,037500868 | 0,065000632 |  |
| 1557472_a_at | FLJ30838        | -2,972500237 | -3,037500868 | 0,065000632 |  |
| 1559433_at   | LOC149773       | -2,972500237 | -3,037500868 | 0,065000632 |  |
| 1562270_at   | ARHGEF7         | -2,972500237 | -3,037500868 | 0,065000632 |  |
| 201110_s_at  | THBS1           | -2,972500237 | -3,037500868 | 0,065000632 |  |
| 207406_at    | CYP7A1          | -2,972500237 | -3,037500868 | 0,065000632 |  |
| 216659_at    | LOC1720         | -2,972500237 | -3,037500868 | 0,065000632 |  |
| 217489_s_at  | IL6R            | -2,972500237 | -3,037500868 | 0,065000632 |  |
| 224226_at    | PKD2L2          | -2,972500237 | -3,037500868 | 0,065000632 |  |
| 232368_at    | BET3L           | -2,972500237 | -3,037500868 | 0,065000632 |  |
| 234242_at    | -               | -2,972500237 | -3,037500868 | 0,065000632 |  |
| 234641_at    | -               | -2,972500237 | -3,037500868 | 0,065000632 |  |
| 238906_s_at  | RHOJ            | -2,972500237 | -3,037500868 | 0,065000632 |  |
| 239655_at    | -               | -2,972500237 | -3,037500868 | 0,065000632 |  |
| 240112_at    | -               | -2,972500237 | -3,037500868 | 0,065000632 |  |
| 240914_at    | -               | -2,972500237 | -3,037500868 | 0,065000632 |  |
| 244742_at    | PAH             | -2,972500237 | -3,037500868 | 0,065000632 |  |
| 217774_s_at  | TRMT112         | 6,050612827  | 5,985623155  | 0,064989673 |  |
| 218554_s_at  | ASH1L           | -0,325749314 | -0,39061235  | 0,064863036 |  |
| 220120_s_at  | EPB41L4A        | -0,325749314 | -0,39061235  | 0,064863036 |  |
| 229607_at    | LOC100652912    | -0,325749314 | -0,39061235  | 0,064863036 |  |
| 230402_at    | DUSP15          | -0,325749314 | -0,39061235  | 0,064863036 |  |
| 230667_at    | FAM204A         | -0,325749314 | -0,39061235  | 0,064863036 |  |
| 231824_at    | LARP1B          | -0,325749314 | -0,39061235  | 0,064863036 |  |
| 241091_at    | -               | -0,325749314 | -0,39061235  | 0,064863036 |  |
| 225825_at    | C20orf194       | 0,900083947  | 0,835239052  | 0,064844895 |  |
| 202325_s_at  | ATP5J           | 6,132787907  | 6,067975866  | 0,064812041 |  |
| 230840_at    | SMIM1           | 1,094335495  | 1,029536893  | 0,064798602 |  |
| 238092_at    | LRFN4           | 1,094335495  | 1,029536893  | 0,064798602 |  |
| 211257_x_at  | ZNF638          | 4,244953702  | 4,180180181  | 0,064773522 |  |
| 1568853_at   | -               | 0,417596971  | 0,352836757  | 0,064760213 |  |
| 202572_s_at  | DLGAP4          | 0,417596971  | 0,352836757  | 0,064760213 |  |
| 209770_at    | BTN3A1          | 0,417596971  | 0,352836757  | 0,064760213 |  |
| 227127_at    | MUSTN1 /// TME  | 0,417596971  | 0,352836757  | 0,064760213 |  |
| 229489_at    | -               | 0,417596971  | 0,352836757  | 0,064760213 |  |
| 242097_at    | -               | 0,417596971  | 0,352836757  | 0,064760213 |  |
| 218320_s_at  | NDUFB11         | 6,064530481  | 5,999775868  | 0,064754613 |  |

|              |                   |              |              |             |  |
|--------------|-------------------|--------------|--------------|-------------|--|
| 227517_s_at  | GAS5 /// SNORD    | 4,589693159  | 4,524995365  | 0,064697795 |  |
| 218136_s_at  | SLC25A37          | 3,525045272  | 3,460374487  | 0,064670786 |  |
| 204114_at    | NID2              | 3,143564369  | 3,078904771  | 0,064659598 |  |
| 222481_at    | FXC1              | 2,68509622   | 2,620464265  | 0,064631955 |  |
| 242621_at    | ZNF498            | 1,422536444  | 1,3579181    | 0,064618344 |  |
| 212631_at    | STX7              | 2,908260915  | 2,843651104  | 0,064609811 |  |
| 212665_at    | TIPARP            | 2,493593689  | 2,428994491  | 0,064599198 |  |
| 202544_at    | GMFB              | 5,145904033  | 5,08131153   | 0,064592503 |  |
| 238197_at    | GATA5             | 2,009141686  | 1,944570415  | 0,064571271 |  |
| 215501_s_at  | DUSP10            | 2,960432227  | 2,895866687  | 0,06456554  |  |
| 226230_at    | SMEK2             | 2,497416546  | 2,432926755  | 0,064489791 |  |
| 213366_x_at  | ATP5C1            | 6,100791503  | 6,036339961  | 0,064451542 |  |
| 202012_s_at  | EXT2              | 3,316904202  | 3,252481567  | 0,064422635 |  |
| 209095_at    | DLD               | 5,698044848  | 5,6336758    | 0,064369048 |  |
| 218888_s_at  | NETO2             | 3,638448528  | 3,574237491  | 0,064211037 |  |
| 222408_s_at  | YPEL5             | 3,508091848  | 3,443906002  | 0,064185847 |  |
| 204352_at    | TRAF5             | 2,640847372  | 2,576704359  | 0,064143013 |  |
| 1560115_a_at | KIAA1217          | 0,702292136  | 0,638150376  | 0,06414176  |  |
| 206085_s_at  | CTH               | 0,702292136  | 0,638150376  | 0,06414176  |  |
| 216473_x_at  | DUX2 /// DUX4 /// | 0,702292136  | 0,638150376  | 0,06414176  |  |
| 215160_x_at  | LOC100289097      | 3,288503211  | 3,22439681   | 0,064106401 |  |
| 235374_at    | MDH1              | 0,44160593   | 0,377530647  | 0,064075283 |  |
| 243780_at    | -                 | 0,44160593   | 0,377530647  | 0,064075283 |  |
| 1555157_at   | -                 | -0,986356909 | -1,050406615 | 0,064049706 |  |
| 202403_s_at  | COL1A2            | -0,986356909 | -1,050406615 | 0,064049706 |  |
| 207967_at    | VPS45             | -0,986356909 | -1,050406615 | 0,064049706 |  |
| 221670_s_at  | LHX3              | -0,986356909 | -1,050406615 | 0,064049706 |  |
| 228058_at    | ZG16B             | -0,986356909 | -1,050406615 | 0,064049706 |  |
| 237591_at    | LINC00173         | -0,986356909 | -1,050406615 | 0,064049706 |  |
| 238971_at    | -                 | -0,986356909 | -1,050406615 | 0,064049706 |  |
| 241743_at    | -                 | -0,986356909 | -1,050406615 | 0,064049706 |  |
| 218482_at    | ENY2              | 6,66562745   | 6,60158002   | 0,06404743  |  |
| 205246_at    | PEX13             | 1,706348269  | 1,642321262  | 0,064027007 |  |
| 1563549_a_at | ANO8              | 0,123193849  | 0,059218869  | 0,063974981 |  |
| 228727_at    | ANXA11            | 0,123193849  | 0,059218869  | 0,063974981 |  |
| 236507_at    | ZDHHC3            | 0,123193849  | 0,059218869  | 0,063974981 |  |
| 239212_at    | LTV1              | 0,123193849  | 0,059218869  | 0,063974981 |  |
| 236715_x_at  | UACA              | 2,030406107  | 1,966439221  | 0,063966887 |  |
| 218288_s_at  | CCDC90B           | 3,933331467  | 3,869433939  | 0,063897528 |  |
| 204026_s_at  | ZWINT             | 4,961359357  | 4,897531959  | 0,063827398 |  |
| 1556129_at   | LOC642533         | 1,129248302  | 1,065442793  | 0,063805509 |  |
| 235181_at    | TYW5              | 1,129248302  | 1,065442793  | 0,063805509 |  |
| 226416_at    | ERI1              | 3,857278636  | 3,793476213  | 0,063802422 |  |
| 200089_s_at  | RPL4 /// SNORD    | 7,093171894  | 7,029395242  | 0,063776652 |  |
| 222148_s_at  | RHOT1             | 3,745192233  | 3,681421378  | 0,063770856 |  |
| 213379_at    | COQ2              | 2,452829957  | 2,389070873  | 0,063759084 |  |
| 222363_at    | -                 | -0,285837228 | -0,34958478  | 0,063747552 |  |
| 237062_at    | -                 | -0,285837228 | -0,34958478  | 0,063747552 |  |
| 237766_at    | ATP9B             | -0,285837228 | -0,34958478  | 0,063747552 |  |
| 218026_at    | CCDC56            | 4,671066265  | 4,607335387  | 0,063730877 |  |
| 219960_s_at  | UCHL5             | 4,472714532  | 4,409010481  | 0,063704051 |  |
| 203952_at    | ATF6              | 2,658027143  | 2,594367918  | 0,063659226 |  |
| 203471_s_at  | PLEK              | 0,457392764  | 0,393761504  | 0,06363126  |  |
| 1554678_s_at | HNRPDL            | 4,891173693  | 4,827565401  | 0,063608292 |  |
| 1552858_at   | MAGEB6            | -3,07502285  | -3,138626879 | 0,063604029 |  |
| 1553344_at   | PCDH15            | -3,07502285  | -3,138626879 | 0,063604029 |  |

|              |                |              |              |             |  |
|--------------|----------------|--------------|--------------|-------------|--|
| 1560086_at   | -              | -3,07502285  | -3,138626879 | 0,063604029 |  |
| 1560182_at   | -              | -3,07502285  | -3,138626879 | 0,063604029 |  |
| 1565876_x_at | -              | -3,07502285  | -3,138626879 | 0,063604029 |  |
| 1568644_at   | ZNF208         | -3,07502285  | -3,138626879 | 0,063604029 |  |
| 1568866_at   | -              | -3,07502285  | -3,138626879 | 0,063604029 |  |
| 210073_at    | ST8SIA1        | -3,07502285  | -3,138626879 | 0,063604029 |  |
| 233502_at    | -              | -3,07502285  | -3,138626879 | 0,063604029 |  |
| 234022_at    | -              | -3,07502285  | -3,138626879 | 0,063604029 |  |
| 239443_at    | PCDHB6         | -3,07502285  | -3,138626879 | 0,063604029 |  |
| 240027_at    | LIN7A          | -3,07502285  | -3,138626879 | 0,063604029 |  |
| 241510_at    | PLSCR2         | -3,07502285  | -3,138626879 | 0,063604029 |  |
| 242198_at    | -              | -3,07502285  | -3,138626879 | 0,063604029 |  |
| 221791_s_at  | TMA7           | 7,348425445  | 7,284892157  | 0,063533288 |  |
| 202797_at    | SACM1L         | 4,117238882  | 4,053733117  | 0,063505765 |  |
| 214085_x_at  | GLIPR1         | 2,048758794  | 1,98530622   | 0,063452574 |  |
| 219081_at    | ANKHD1 /// ANK | 2,666540916  | 2,603119255  | 0,063421661 |  |
| 208670_s_at  | EID1           | 3,843828743  | 3,780418488  | 0,063410256 |  |
| 201306_s_at  | ANP32B         | 7,174889267  | 7,111502174  | 0,063387093 |  |
| 202272_s_at  | FBXO28         | 4,002215714  | 3,938828971  | 0,063386743 |  |
| 202960_s_at  | MUT            | 3,571118904  | 3,507749374  | 0,06336953  |  |
| 210869_s_at  | MCAM           | 5,076043943  | 5,01268698   | 0,063356962 |  |
| 200020_at    | TARDBP         | 5,179010189  | 5,115661018  | 0,063349171 |  |
| 1556662_at   | LOC100506142   | -0,946847173 | -1,010192375 | 0,063345202 |  |
| 1557615_a_at | SLIT1          | -0,946847173 | -1,010192375 | 0,063345202 |  |
| 202687_s_at  | TNFSF10        | -0,946847173 | -1,010192375 | 0,063345202 |  |
| 203770_s_at  | STS            | -0,946847173 | -1,010192375 | 0,063345202 |  |
| 209866_s_at  | LPHN3          | -0,946847173 | -1,010192375 | 0,063345202 |  |
| 229910_at    | SHE            | -0,946847173 | -1,010192375 | 0,063345202 |  |
| 236581_at    | -              | -0,946847173 | -1,010192375 | 0,063345202 |  |
| 240317_at    | PCDHB4         | -0,946847173 | -1,010192375 | 0,063345202 |  |
| 45297_at     | EHD2           | 1,05337236   | 0,990048021  | 0,063324339 |  |
| 225198_at    | VAPA           | 4,317026567  | 4,253719424  | 0,063307143 |  |
| 214930_at    | SLITRK5        | 1,607231019  | 1,543943227  | 0,063287792 |  |
| 226998_at    | NAA15          | 3,277429131  | 3,21415095   | 0,063278181 |  |
| 215329_s_at  | CDK11A /// CDK | 0,95671774   | 0,893473268  | 0,063244472 |  |
| 244455_at    | KCNT2          | 0,95671774   | 0,893473268  | 0,063244472 |  |
| 205622_at    | SMPD2          | 0,735041319  | 0,67181667   | 0,063224649 |  |
| 228753_at    | LOC100128737   | 1,473887017  | 1,410714371  | 0,063172645 |  |
| 204842_x_at  | PRKAR2A        | 3,32445605   | 3,261354437  | 0,063101613 |  |
| 218636_s_at  | MAN1B1         | 2,061726373  | 1,998633167  | 0,063093206 |  |
| 222035_s_at  | PAPOLA         | 5,648514173  | 5,585471285  | 0,063042888 |  |
| 219593_at    | SLC15A3        | -0,259832361 | -0,322870281 | 0,06303792  |  |
| 227985_at    | LOC100506098   | -0,259832361 | -0,322870281 | 0,06303792  |  |
| 231447_at    | DZANK1-AS1     | -0,259832361 | -0,322870281 | 0,06303792  |  |
| 239531_at    | -              | -0,259832361 | -0,322870281 | 0,06303792  |  |
| 244827_at    | -              | -0,259832361 | -0,322870281 | 0,06303792  |  |
| 1554764_a_at | LINC00301      | -3,114791413 | -3,177802286 | 0,063010873 |  |
| 1558519_at   | KANSL1L        | -3,114791413 | -3,177802286 | 0,063010873 |  |
| 1562396_at   | -              | -3,114791413 | -3,177802286 | 0,063010873 |  |
| 1563704_at   | -              | -3,114791413 | -3,177802286 | 0,063010873 |  |
| 215516_at    | LAMB4          | -3,114791413 | -3,177802286 | 0,063010873 |  |
| 224362_at    | LOC100128922   | -3,114791413 | -3,177802286 | 0,063010873 |  |
| 228071_at    | GIMAP7         | -3,114791413 | -3,177802286 | 0,063010873 |  |
| 233025_at    | PDZD2          | -3,114791413 | -3,177802286 | 0,063010873 |  |
| 242622_x_at  | PTEN           | -3,114791413 | -3,177802286 | 0,063010873 |  |
| 205565_s_at  | FXN            | 2,965960999  | 2,902971658  | 0,062989342 |  |

|              |                  |              |              |             |  |
|--------------|------------------|--------------|--------------|-------------|--|
| 235067_at    | MKLN1            | 2,802535172  | 2,739547836  | 0,062987336 |  |
| 204952_at    | LYPD3            | 0,480753764  | 0,417770464  | 0,0629833   |  |
| 205189_s_at  | FANCC            | 0,480753764  | 0,417770464  | 0,0629833   |  |
| 230762_at    | -                | 0,480753764  | 0,417770464  | 0,0629833   |  |
| 221196_x_at  | BRCC3            | 1,859746653  | 1,796776588  | 0,062970065 |  |
| 37005_at     | C1orf151-NBL1 // | 1,481627368  | 1,418668082  | 0,062959286 |  |
| 200926_at    | RPS23            | 8,077205192  | 8,014270097  | 0,062935095 |  |
| 222473_s_at  | ERBB2IP          | 2,55541096   | 2,492544876  | 0,062866084 |  |
| 206846_s_at  | HDAC6            | 3,209137871  | 3,146317015  | 0,062820857 |  |
| 225972_at    | TMEM64           | 2,074578432  | 2,011838132  | 0,0627403   |  |
| 205255_x_at  | TCF7             | 1,168140757  | 1,105412836  | 0,062727922 |  |
| 211027_s_at  | IKBKB            | 0,171847695  | 0,109221392  | 0,062626303 |  |
| 219963_at    | DUSP13           | 0,171847695  | 0,109221392  | 0,062626303 |  |
| 230191_at    | TTBK1            | 0,171847695  | 0,109221392  | 0,062626303 |  |
| 230672_at    | -                | 0,171847695  | 0,109221392  | 0,062626303 |  |
| 234773_x_at  | -                | 0,171847695  | 0,109221392  | 0,062626303 |  |
| 243791_at    | -                | 0,171847695  | 0,109221392  | 0,062626303 |  |
| 218793_s_at  | SCML1            | 2,173470163  | 2,110887591  | 0,062582572 |  |
| 221914_at    | SYN1             | 0,496120222  | 0,433557298  | 0,062562924 |  |
| 229668_at    | -                | 0,496120222  | 0,433557298  | 0,062562924 |  |
| 212517_at    | ATRN             | 2,082235068  | 2,019703483  | 0,062531585 |  |
| 209476_at    | TMX1             | 5,790819745  | 5,728308962  | 0,062510783 |  |
| 215913_s_at  | GULP1            | 0,984222186  | 0,921731975  | 0,06249021  |  |
| 1560916_a_at | DPY19L1          | 1,177702228  | 1,115234684  | 0,062467543 |  |
| 235233_s_at  | GMEB1            | 1,177702228  | 1,115234684  | 0,062467543 |  |
| 228499_at    | PFKFB4           | 2,501229299  | 2,438805127  | 0,062424172 |  |
| 218830_at    | RPL26L1          | 4,866629209  | 4,804227461  | 0,062401747 |  |
| 208620_at    | PCBP1            | 5,158634383  | 5,096265831  | 0,062368552 |  |
| 223532_at    | ANKRD39          | 1,504602299  | 1,442269454  | 0,062332845 |  |
| 225024_at    | RPRD1B           | 3,541801785  | 3,479511525  | 0,06229026  |  |
| 202141_s_at  | COPS8            | 4,453164021  | 4,390931194  | 0,062232827 |  |
| 203832_at    | SNRPF            | 5,947929114  | 5,885696298  | 0,062232816 |  |
| 222464_s_at  | MCMBP            | 4,045288912  | 3,983081173  | 0,062207739 |  |
| 213945_s_at  | NUP210           | 0,995078803  | 0,932882274  | 0,062196529 |  |
| 236915_at    | C4orf47          | 0,995078803  | 0,932882274  | 0,062196529 |  |
| 1554037_a_at | ZBTB24           | -0,888496123 | -0,950686014 | 0,062189892 |  |
| 1563113_at   | UBR4             | -0,888496123 | -0,950686014 | 0,062189892 |  |
| 1563792_at   | AMN              | -0,888496123 | -0,950686014 | 0,062189892 |  |
| 204713_s_at  | F5               | -0,888496123 | -0,950686014 | 0,062189892 |  |
| 206674_at    | FLT3             | -0,888496123 | -0,950686014 | 0,062189892 |  |
| 207298_at    | SLC17A3          | -0,888496123 | -0,950686014 | 0,062189892 |  |
| 211167_s_at  | GCK              | -0,888496123 | -0,950686014 | 0,062189892 |  |
| 216141_at    | -                | -0,888496123 | -0,950686014 | 0,062189892 |  |
| 216911_s_at  | HIC2             | -0,888496123 | -0,950686014 | 0,062189892 |  |
| 221350_at    | HOXC8            | -0,888496123 | -0,950686014 | 0,062189892 |  |
| 226185_at    | CDS1             | -0,888496123 | -0,950686014 | 0,062189892 |  |
| 229246_at    | FLJ44342         | -0,888496123 | -0,950686014 | 0,062189892 |  |
| 230489_at    | CD5              | -0,888496123 | -0,950686014 | 0,062189892 |  |
| 236592_at    | -                | -0,888496123 | -0,950686014 | 0,062189892 |  |
| 243157_at    | -                | -0,888496123 | -0,950686014 | 0,062189892 |  |
| 226936_at    | CENPW            | 5,265619128  | 5,20345168   | 0,062167447 |  |
| 224605_at    | C4orf3           | 2,833109217  | 2,770953871  | 0,062155346 |  |
| 228361_at    | E2F2             | 2,190100188  | 2,127967638  | 0,06213255  |  |
| 235020_at    | TAF4B            | 2,190100188  | 2,127967638  | 0,06213255  |  |
| 208532_x_at  | KRTAP5-8         | 1,512180019  | 1,450051551  | 0,062128468 |  |
| 213848_at    | DUSP7            | 2,582657321  | 2,520531219  | 0,062126102 |  |



|              |                 |              |              |             |  |
|--------------|-----------------|--------------|--------------|-------------|--|
| 1555754_s_at | ATN1            | 1,191926657  | 1,129843209  | 0,062083448 |  |
| 215905_s_at  | SNRNP40         | 4,66810148   | 4,606029888  | 0,062071591 |  |
| 201152_s_at  | MBNL1           | 4,994704915  | 4,932671897  | 0,062033018 |  |
| 217256_x_at  | -               | 5,956025826  | 5,894010769  | 0,062015057 |  |
| 1560382_at   | GAB1            | -0,221656139 | -0,283667828 | 0,062011689 |  |
| 206366_x_at  | XCL1            | -0,221656139 | -0,283667828 | 0,062011689 |  |
| 213182_x_at  | CDKN1C          | -0,221656139 | -0,283667828 | 0,062011689 |  |
| 217251_x_at  | -               | -0,221656139 | -0,283667828 | 0,062011689 |  |
| 224271_x_at  | FRMD8P1         | -0,221656139 | -0,283667828 | 0,062011689 |  |
| 229425_at    | -               | -0,221656139 | -0,283667828 | 0,062011689 |  |
| 229451_at    | GALNT9          | -0,221656139 | -0,283667828 | 0,062011689 |  |
| 230982_at    | SOX1            | -0,221656139 | -0,283667828 | 0,062011689 |  |
| 209036_s_at  | MDH2            | 6,026259918  | 5,964300133  | 0,061959784 |  |
| 215822_x_at  | MYT1            | 0,518867317  | 0,456918297  | 0,06194902  |  |
| 222556_at    | ALG5            | 0,518867317  | 0,456918297  | 0,06194902  |  |
| 225313_at    | FAM217B         | 3,897615369  | 3,835672678  | 0,061942691 |  |
| 201997_s_at  | SPEN            | 3,753208234  | 3,691304166  | 0,061904068 |  |
| 207157_s_at  | GNG5            | 6,322919735  | 6,261020454  | 0,061899281 |  |
| 203752_s_at  | JUND            | 5,379008977  | 5,317117754  | 0,061891223 |  |
| 221245_s_at  | FZD5            | 2,369762403  | 2,307890888  | 0,061871515 |  |
| 238528_at    | UBR1            | 1,659347917  | 1,59747851   | 0,061869407 |  |
| 216397_s_at  | BOP1            | 2,661438684  | 2,599625088  | 0,061813596 |  |
| 238722_x_at  | NAPEPLD         | 1,011212064  | 0,949447784  | 0,06176428  |  |
| 221046_s_at  | GTPBP8          | 3,354274239  | 3,292527802  | 0,061746437 |  |
| 218047_at    | OSBPL9          | 5,037507384  | 4,97576335   | 0,061744034 |  |
| 225125_at    | MMGT1           | 3,06588531   | 3,004228687  | 0,061656623 |  |
| 202789_at    | PLCG1           | 2,600539826  | 2,538891651  | 0,061648175 |  |
| 214463_x_at  | HIST1H4J        | 2,600539826  | 2,538891651  | 0,061648175 |  |
| 1553261_x_at | ALS2CR11        | -3,212234735 | -3,273861381 | 0,061626647 |  |
| 1556598_at   | ARPP21 /// LOC1 | -3,212234735 | -3,273861381 | 0,061626647 |  |
| 1560144_at   | -               | -3,212234735 | -3,273861381 | 0,061626647 |  |
| 1560581_at   | -               | -3,212234735 | -3,273861381 | 0,061626647 |  |
| 1569592_a_at | F11             | -3,212234735 | -3,273861381 | 0,061626647 |  |
| 216974_at    | -               | -3,212234735 | -3,273861381 | 0,061626647 |  |
| 241909_at    | TNKS2           | -3,212234735 | -3,273861381 | 0,061626647 |  |
| 244435_at    | FAM196A         | -3,212234735 | -3,273861381 | 0,061626647 |  |
| 200683_s_at  | UBE2L3          | 3,497632487  | 3,436090594  | 0,061541892 |  |
| 230739_at    | FAM210A         | 2,535098095  | 2,473581079  | 0,061517016 |  |
| 1556341_s_at | MAPK12          | 0,798390451  | 0,73688026   | 0,06151019  |  |
| 214441_at    | STX6            | 0,798390451  | 0,73688026   | 0,06151019  |  |
| 226787_at    | ZNF18           | 0,798390451  | 0,73688026   | 0,06151019  |  |
| 221685_s_at  | CCDC99          | 4,606604592  | 4,545117128  | 0,061487464 |  |
| 1569302_at   | KIAA1731        | 1,021868205  | 0,960386719  | 0,061481486 |  |
| 1553237_x_at | PCDHAC1         | -0,85085127  | -0,912331589 | 0,061480319 |  |
| 1556224_a_at | LOC155060 /// Z | -0,85085127  | -0,912331589 | 0,061480319 |  |
| 1570536_at   | -               | -0,85085127  | -0,912331589 | 0,061480319 |  |
| 202018_s_at  | LTF             | -0,85085127  | -0,912331589 | 0,061480319 |  |
| 206870_at    | PPARA           | -0,85085127  | -0,912331589 | 0,061480319 |  |
| 207552_at    | ATP5G2          | -0,85085127  | -0,912331589 | 0,061480319 |  |
| 207921_x_at  | PAX8            | -0,85085127  | -0,912331589 | 0,061480319 |  |
| 208189_s_at  | MYO7A           | -0,85085127  | -0,912331589 | 0,061480319 |  |
| 216157_at    | -               | -0,85085127  | -0,912331589 | 0,061480319 |  |
| 223736_at    | IFT81           | -0,85085127  | -0,912331589 | 0,061480319 |  |
| 236719_at    | -               | -0,85085127  | -0,912331589 | 0,061480319 |  |
| 238145_at    | ZNF496          | -0,85085127  | -0,912331589 | 0,061480319 |  |
| 240853_at    | -               | -0,85085127  | -0,912331589 | 0,061480319 |  |

|              |                 |              |              |             |  |
|--------------|-----------------|--------------|--------------|-------------|--|
| 244751_at    | PCP2            | -0,85085127  | -0,912331589 | 0,061480319 |  |
| 215165_x_at  | UMPS            | 4,097225224  | 4,035745559  | 0,061479664 |  |
| 212897_at    | CDK19           | 1,67631007   | 1,614891062  | 0,061419009 |  |
| 1552450_a_at | DNAJC5G         | -0,196756757 | -0,258114234 | 0,061357477 |  |
| 1557382_x_at | AGAP11          | -0,196756757 | -0,258114234 | 0,061357477 |  |
| 205793_x_at  | TNK1            | -0,196756757 | -0,258114234 | 0,061357477 |  |
| 226096_at    | FNDC5           | -0,196756757 | -0,258114234 | 0,061357477 |  |
| 234430_at    | ANTXR1          | -0,196756757 | -0,258114234 | 0,061357477 |  |
| 204642_at    | S1PR1           | 0,541261317  | 0,479907041  | 0,061354276 |  |
| 207130_at    | ZMYND8          | 0,541261317  | 0,479907041  | 0,061354276 |  |
| 225018_at    | SPIRE1          | 0,541261317  | 0,479907041  | 0,061354276 |  |
| 203039_s_at  | NDUFS1          | 4,196980309  | 4,135635705  | 0,061344604 |  |
| 221005_s_at  | PTDSS2          | 1,542099044  | 1,480766833  | 0,061332211 |  |
| 243750_x_at  | FAM207A         | 2,220484971  | 2,159161028  | 0,061323943 |  |
| 201611_s_at  | ICMT            | 2,392522438  | 2,331254065  | 0,061268373 |  |
| 224738_x_at  | RPL7L1          | 6,229619784  | 6,168388135  | 0,061231649 |  |
| 41512_at     | BRAP            | 2,317740882  | 2,256673851  | 0,061067031 |  |
| 1552377_s_at | FAM18B2         | 1,037706275  | 0,976641161  | 0,061065114 |  |
| 207585_s_at  | RPL36AL         | 6,804406705  | 6,74335226   | 0,061054446 |  |
| 1563660_at   | -               | -3,250025915 | -3,311072652 | 0,061046737 |  |
| 207447_s_at  | MGAT4C          | -3,250025915 | -3,311072652 | 0,061046737 |  |
| 209292_at    | ID4             | -3,250025915 | -3,311072652 | 0,061046737 |  |
| 241868_at    | -               | -3,250025915 | -3,311072652 | 0,061046737 |  |
| 218143_s_at  | SCAMP2          | 3,319065909  | 3,258033502  | 0,061032407 |  |
| 204741_at    | BICD1           | 0,555999837  | 0,495031851  | 0,060967986 |  |
| 231017_at    | STK11           | 1,820612054  | 1,759685182  | 0,060926872 |  |
| 202257_s_at  | CD2BP2          | 2,406821352  | 2,345926937  | 0,060894416 |  |
| 212102_s_at  | KPNA6 /// LOC10 | 2,14450783   | 2,083632167  | 0,060875663 |  |
| 222852_at    | C10orf88        | 1,238353345  | 1,177496821  | 0,060856524 |  |
| 224846_at    | SHKBP1          | 1,238353345  | 1,177496821  | 0,060856524 |  |
| 203899_s_at  | CRCP            | 1,560488174  | 1,499637023  | 0,060851151 |  |
| 203382_s_at  | APOE            | 6,121220712  | 6,060370018  | 0,060850694 |  |
| 46256_at     | SPSB3           | 3,367911651  | 3,307062282  | 0,06084937  |  |
| 212982_at    | ZDHHHC17        | 2,940912947  | 2,880111483  | 0,060801464 |  |
| 229269_x_at  | SSBP4           | 3,285189903  | 3,22439681   | 0,060793093 |  |
| 226088_at    | ZDHHHC12        | 1,04816921   | 0,987376598  | 0,060792613 |  |
| 208688_x_at  | EIF3B           | 5,125360659  | 5,064617399  | 0,060743259 |  |
| 238880_at    | GTF3A           | 2,243430036  | 2,182705233  | 0,060724803 |  |
| 224413_s_at  | TM2D2           | 5,052201321  | 4,991513183  | 0,060688139 |  |
| 219979_s_at  | C11orf73        | 3,000043914  | 2,939363796  | 0,060680119 |  |
| 201845_s_at  | RYBP            | 5,595105514  | 5,534456965  | 0,060648549 |  |
| 1560587_s_at | PRDX5           | 4,961359357  | 4,900729837  | 0,06062952  |  |
| 228201_at    | ARL13B          | 3,336243945  | 3,275657468  | 0,060586477 |  |
| 212433_x_at  | RPS2 /// SNORA  | 7,926763454  | 7,866183754  | 0,060579699 |  |
| 218720_x_at  | SEZ6L2          | 1,709647566  | 1,64909809   | 0,060549475 |  |
| 218679_s_at  | VPS28           | 4,032830746  | 3,972313606  | 0,06051714  |  |
| 217818_s_at  | ARPC4           | 3,006764929  | 2,946258252  | 0,060506676 |  |
| 209724_s_at  | ZFP161          | 1,251994932  | 1,191491281  | 0,060503651 |  |
| 217956_s_at  | ENOPH1          | 4,442792954  | 4,382314353  | 0,060478601 |  |
| 233822_x_at  | -               | -3,287237186 | -3,347710726 | 0,06047354  |  |
| 244586_x_at  | -               | -3,287237186 | -3,347710726 | 0,06047354  |  |
| 202364_at    | MXI1            | 3,253893136  | 3,193438316  | 0,06045482  |  |
| 216354_at    | -               | 0,57782909   | 0,51742585   | 0,06040324  |  |
| 219473_at    | GDAP2           | 0,57782909   | 0,51742585   | 0,06040324  |  |
| 227684_at    | S1PR2           | 1,578645857  | 1,518263577  | 0,060382279 |  |
| 209531_at    | GSTZ1           | 2,716594694  | 2,656223838  | 0,060370856 |  |

|              |                  |              |              |             |  |
|--------------|------------------|--------------|--------------|-------------|--|
| 1562603_at   | RAD51L3-RFFL     | -0,79540287  | -0,855751026 | 0,060348156 |  |
| 210954_s_at  | TSC22D2          | -0,79540287  | -0,855751026 | 0,060348156 |  |
| 217138_x_at  | IGLC1            | -0,79540287  | -0,855751026 | 0,060348156 |  |
| 217203_at    | -                | -0,79540287  | -0,855751026 | 0,060348156 |  |
| 219383_at    | PRR5L            | -0,79540287  | -0,855751026 | 0,060348156 |  |
| 223464_at    | OSBPL5           | -0,79540287  | -0,855751026 | 0,060348156 |  |
| 227948_at    | FGD4             | -0,79540287  | -0,855751026 | 0,060348156 |  |
| 232328_at    | ZNF552           | -0,79540287  | -0,855751026 | 0,060348156 |  |
| 239098_at    | KCNRG            | -0,79540287  | -0,855751026 | 0,060348156 |  |
| 243367_at    | -                | -0,79540287  | -0,855751026 | 0,060348156 |  |
| 201071_x_at  | SF3B1            | 6,00770067   | 5,947389902  | 0,060310769 |  |
| 209081_s_at  | COL18A1          | 1,261018186  | 1,200746069  | 0,060272116 |  |
| 221290_s_at  | MUM1             | 1,261018186  | 1,200746069  | 0,060272116 |  |
| 202143_s_at  | COPS8            | 4,119101006  | 4,058831494  | 0,060269512 |  |
| 211509_s_at  | RTN4             | 5,592203727  | 5,531938482  | 0,060265245 |  |
| 201473_at    | JUNB             | 2,261526912  | 2,201267805  | 0,060259107 |  |
| 237289_at    | CREB1            | 1,58584542   | 1,525647381  | 0,06019804  |  |
| 226520_at    | LCOR             | 2,171078719  | 2,110887591  | 0,060191128 |  |
| 211799_x_at  | HLA-C            | 3,992767659  | 3,932593347  | 0,060174312 |  |
| 223353_at    | MOB2             | 1,073999308  | 1,013870809  | 0,060128499 |  |
| 226273_at    | CLCN5            | 1,073999308  | 1,013870809  | 0,060128499 |  |
| 221789_x_at  | RHOT2            | 1,968405881  | 1,908311039  | 0,060094842 |  |
| 201356_at    | SF3A1            | 3,791855421  | 3,731768909  | 0,060086513 |  |
| 209814_at    | ZNF330           | 4,419307767  | 4,359253484  | 0,060054283 |  |
| 211938_at    | EIF4B /// LOC100 | 4,777867415  | 4,717826149  | 0,060041266 |  |
| 219748_at    | TREML2           | 0,592200562  | 0,532164371  | 0,060036191 |  |
| 222684_s_at  | NOL10            | 4,293033569  | 4,23300737   | 0,060026199 |  |
| 217989_at    | HSD17B11         | 3,664184451  | 3,604188755  | 0,059995696 |  |
| 224759_s_at  | C12orf23         | 4,297973795  | 4,238072872  | 0,059900923 |  |
| 228908_s_at  | LOC642852        | 2,799441827  | 2,739547836  | 0,059893991 |  |
| 200663_at    | CD63             | 5,864822529  | 5,804934308  | 0,05988822  |  |
| 214224_s_at  | PIN4             | 3,598072957  | 3,538185672  | 0,059887285 |  |
| 228910_at    | CD82             | 1,735773781  | 1,675891488  | 0,059882293 |  |
| 225296_at    | ZNF317           | 2,976955384  | 2,917077481  | 0,059877903 |  |
| 212610_at    | PTPN11           | 5,621619186  | 5,561761707  | 0,059857479 |  |
| 1554759_at   | SRCIN1           | -0,136301282 | -0,19610998  | 0,059808698 |  |
| 205754_at    | F2               | -0,136301282 | -0,19610998  | 0,059808698 |  |
| 207313_x_at  | KIR3DL1 /// KIR3 | -0,136301282 | -0,19610998  | 0,059808698 |  |
| 213669_at    | FCHO1            | -0,136301282 | -0,19610998  | 0,059808698 |  |
| 214128_at    | DAGLA            | -0,136301282 | -0,19610998  | 0,059808698 |  |
| 228172_at    | -                | -0,136301282 | -0,19610998  | 0,059808698 |  |
| 236676_at    | -                | -0,136301282 | -0,19610998  | 0,059808698 |  |
| 202801_at    | PRKACA           | 2,52764011   | 2,467842989  | 0,059797121 |  |
| 203525_s_at  | APC              | 3,188003814  | 3,128242026  | 0,059761787 |  |
| 202618_s_at  | MECP2            | 1,089278259  | 1,029536893  | 0,059741366 |  |
| 212691_at    | NUP188           | 2,604089881  | 2,544354523  | 0,059735357 |  |
| 222978_at    | SURF4            | 4,904731178  | 4,845008859  | 0,059722319 |  |
| 206145_at    | RHAG             | 7,378599585  | 7,318890442  | 0,059709144 |  |
| 1558668_s_at | SPATA22          | -3,342483913 | -3,402185466 | 0,059701552 |  |
| 208932_at    | PPP4C            | 4,284208955  | 4,224525141  | 0,059683814 |  |
| 1559713_at   | LOC100507150     | -0,759588698 | -0,819238336 | 0,059649638 |  |
| 1562549_at   | -                | -0,759588698 | -0,819238336 | 0,059649638 |  |
| 1569681_at   | -                | -0,759588698 | -0,819238336 | 0,059649638 |  |
| 202638_s_at  | ICAM1            | -0,759588698 | -0,819238336 | 0,059649638 |  |
| 206781_at    | DNAJC4           | -0,759588698 | -0,819238336 | 0,059649638 |  |
| 208712_at    | CCND1            | -0,759588698 | -0,819238336 | 0,059649638 |  |

|              |                 |              |              |             |  |
|--------------|-----------------|--------------|--------------|-------------|--|
| 217115_at    | MKRN7P          | -0,759588698 | -0,819238336 | 0,059649638 |  |
| 219107_at    | BCAN            | -0,759588698 | -0,819238336 | 0,059649638 |  |
| 225956_at    | CREBRF          | -0,759588698 | -0,819238336 | 0,059649638 |  |
| 228380_at    | SENP2           | -0,759588698 | -0,819238336 | 0,059649638 |  |
| 230183_at    | EXT1            | -0,759588698 | -0,819238336 | 0,059649638 |  |
| 240728_at    | -               | -0,759588698 | -0,819238336 | 0,059649638 |  |
| 242745_at    | CASR            | -0,759588698 | -0,819238336 | 0,059649638 |  |
| 244542_at    | BCDIN3D-AS1     | -0,759588698 | -0,819238336 | 0,059649638 |  |
| 222338_x_at  | LOC646808       | 2,929639344  | 2,869995113  | 0,05964423  |  |
| 201060_x_at  | STOM            | 5,001955461  | 4,94235962   | 0,059595841 |  |
| 217873_at    | CAB39           | 4,699139437  | 4,639594721  | 0,059544716 |  |
| 213007_at    | FANCI           | 3,813483425  | 3,753943043  | 0,059540382 |  |
| 218490_s_at  | ZNF302          | 4,097854871  | 4,038328982  | 0,059525889 |  |
| 229666_s_at  | CSTF3           | 3,19743497   | 3,137910193  | 0,059524777 |  |
| 201725_at    | CDC123          | 4,920655822  | 4,861149946  | 0,059505876 |  |
| 240393_at    | -               | 0,613492853  | 0,553993624  | 0,059499229 |  |
| 219817_at    | MAPKAPK5-AS1    | 1,614289682  | 1,55481039   | 0,059479291 |  |
| 203944_x_at  | BTN2A1          | 2,817903185  | 2,758473378  | 0,059429807 |  |
| 218716_x_at  | MTO1            | 3,720873481  | 3,661450356  | 0,059423126 |  |
| 201360_at    | CST3            | 3,464815649  | 3,405399563  | 0,059416086 |  |
| 203454_s_at  | ATOX1           | 4,600397104  | 4,541024081  | 0,059373023 |  |
| 212979_s_at  | FAM115A /// LOC | 3,105247586  | 3,045906378  | 0,059341208 |  |
| 200816_s_at  | PAFAH1B1        | 3,999522577  | 3,940211012  | 0,059311565 |  |
| 225550_at    | CNST            | 2,206540699  | 2,147243253  | 0,059297446 |  |
| 200941_at    | HSBP1           | 3,471633352  | 3,412387088  | 0,059246265 |  |
| 202387_at    | BAG1            | 3,471633352  | 3,412387088  | 0,059246265 |  |
| 224790_at    | ASAP1           | 3,827217859  | 3,768019955  | 0,059197904 |  |
| 221998_s_at  | VRK3            | 2,947914474  | 2,888726553  | 0,059187921 |  |
| 213363_at    | CA5BP1          | 1,305306849  | 1,246149888  | 0,059156961 |  |
| 213859_x_at  | SMARCA5         | 2,764969948  | 2,705818724  | 0,059151224 |  |
| 1557169_x_at | HCG11           | 0,627515113  | 0,568365095  | 0,059150018 |  |
| 209241_x_at  | MINK1           | 0,627515113  | 0,568365095  | 0,059150018 |  |
| 216860_s_at  | GDF11           | 0,627515113  | 0,568365095  | 0,059150018 |  |
| 216246_at    | -               | 2,213529682  | 2,154405725  | 0,059123957 |  |
| 224025_s_at  | ATG7            | 1,114389003  | 1,055274826  | 0,059114178 |  |
| 227135_at    | NAAA            | 1,114389003  | 1,055274826  | 0,059114178 |  |
| 214196_s_at  | TPP1            | 0,30867765   | 0,249604176  | 0,059073474 |  |
| 226440_at    | DUSP22 /// LOC  | 2,009141686  | 1,950068772  | 0,059072914 |  |
| 232052_at    | LOC440944       | 1,631786706  | 1,572742379  | 0,059044327 |  |
| 223457_at    | COPG2           | 3,120200849  | 3,061230246  | 0,058970603 |  |
| 215171_s_at  | TIMM17A         | 5,960360187  | 5,90139096   | 0,058969227 |  |
| 210622_x_at  | CDK10           | 1,638726528  | 1,579853228  | 0,058873299 |  |
| 212434_at    | GRPEL1          | 3,903389697  | 3,844556416  | 0,058833282 |  |
| 225052_at    | TMEM203         | 3,680249569  | 3,621520989  | 0,05872858  |  |
| 238842_at    | -               | 2,846658948  | 2,787940144  | 0,058718803 |  |
| 212644_s_at  | MAPK1IP1L       | 4,495352883  | 4,436691079  | 0,058661804 |  |
| 236685_at    | -               | 0,648296226  | 0,589657387  | 0,058638839 |  |
| 1564272_a_at | KLHDC1          | -3,41365796  | -3,472251727 | 0,058593767 |  |
| 1561509_at   | -               | -0,706943342 | -0,765504029 | 0,058560687 |  |
| 1566760_at   | FLJ34208        | -0,706943342 | -0,765504029 | 0,058560687 |  |
| 207521_s_at  | ATP2A3          | -0,706943342 | -0,765504029 | 0,058560687 |  |
| 216472_at    | -               | -0,706943342 | -0,765504029 | 0,058560687 |  |
| 217603_at    | ATP6V0A2        | -0,706943342 | -0,765504029 | 0,058560687 |  |
| 217658_at    | THAP3           | -0,706943342 | -0,765504029 | 0,058560687 |  |
| 221166_at    | FGF23           | -0,706943342 | -0,765504029 | 0,058560687 |  |
| 223729_at    | CECR2           | -0,706943342 | -0,765504029 | 0,058560687 |  |

|              |                   |              |              |             |  |
|--------------|-------------------|--------------|--------------|-------------|--|
| 229811_at    | -                 | -0,706943342 | -0,765504029 | 0,058560687 |  |
| 231371_at    | TDRD10            | -0,706943342 | -0,765504029 | 0,058560687 |  |
| 237228_at    | ZDHC1             | -0,706943342 | -0,765504029 | 0,058560687 |  |
| 239202_at    | RAB3B             | -0,706943342 | -0,765504029 | 0,058560687 |  |
| 241693_at    | -                 | -0,706943342 | -0,765504029 | 0,058560687 |  |
| 223640_at    | HCST              | 1,139070151  | 1,080561626  | 0,058508525 |  |
| 201384_s_at  | NBR1              | 2,658027143  | 2,599625088  | 0,058402056 |  |
| 234630_at    | -                 | -0,078265071 | -0,136643983 | 0,058378911 |  |
| 234681_s_at  | CHD6              | -0,078265071 | -0,136643983 | 0,058378911 |  |
| 239187_at    | DCAF16            | -0,078265071 | -0,136643983 | 0,058378911 |  |
| 243921_at    | -                 | -0,078265071 | -0,136643983 | 0,058378911 |  |
| 201082_s_at  | DCTN1             | 0,661985843  | 0,603679647  | 0,058306196 |  |
| 202739_s_at  | PHKB              | 0,661985843  | 0,603679647  | 0,058306196 |  |
| 224182_x_at  | SEMA6B            | 0,661985843  | 0,603679647  | 0,058306196 |  |
| 223547_at    | JKAMP             | 2,344516784  | 2,286318242  | 0,058198542 |  |
| 218939_at    | LETM1             | 1,932146506  | 1,874012195  | 0,058134311 |  |
| 221858_at    | TBC1D12           | 1,932146506  | 1,874012195  | 0,058134311 |  |
| 208872_s_at  | REEP5             | 4,537271727  | 4,479143747  | 0,05812798  |  |
| 204640_s_at  | SPOP              | 3,741167469  | 3,683073218  | 0,058094251 |  |
| 217045_x_at  | NCR2              | 0,934330293  | 0,876248481  | 0,058081812 |  |
| 230740_at    | EHD3              | 0,934330293  | 0,876248481  | 0,058081812 |  |
| 239835_at    | KBTBD8            | 3,158127685  | 3,100079607  | 0,058048079 |  |
| 1557303_at   | NT5C              | 0,351548291  | 0,293518836  | 0,058029455 |  |
| 1568666_at   | PLIN5             | 0,351548291  | 0,293518836  | 0,058029455 |  |
| 219980_at    | C4orf29           | 0,351548291  | 0,293518836  | 0,058029455 |  |
| 202973_x_at  | FAM13A            | 2,938102794  | 2,880111483  | 0,057991311 |  |
| 218079_s_at  | GGNBP2            | 3,21379258   | 3,155865206  | 0,057927374 |  |
| 242550_at    | EIF3B             | 1,163336153  | 1,105412836  | 0,057923318 |  |
| 234672_s_at  | TMEM48            | 4,864040601  | 4,806123612  | 0,057916989 |  |
| 1553977_a_at | CYP39A1           | -0,67289328  | -0,730778808 | 0,057885528 |  |
| 1554796_at   | DPP6              | -0,67289328  | -0,730778808 | 0,057885528 |  |
| 1557518_a_at | -                 | -0,67289328  | -0,730778808 | 0,057885528 |  |
| 1559117_at   | -                 | -0,67289328  | -0,730778808 | 0,057885528 |  |
| 1559119_at   | -                 | -0,67289328  | -0,730778808 | 0,057885528 |  |
| 205312_at    | SPI1              | -0,67289328  | -0,730778808 | 0,057885528 |  |
| 206671_at    | SAG               | -0,67289328  | -0,730778808 | 0,057885528 |  |
| 222072_at    | LOC100505933      | -0,67289328  | -0,730778808 | 0,057885528 |  |
| 223616_at    | ZNF649            | -0,67289328  | -0,730778808 | 0,057885528 |  |
| 229361_at    | SLC25A27          | -0,67289328  | -0,730778808 | 0,057885528 |  |
| 230994_at    | FAM181B           | -0,67289328  | -0,730778808 | 0,057885528 |  |
| 235605_at    | CASZ1             | -0,67289328  | -0,730778808 | 0,057885528 |  |
| 240493_at    | -                 | -0,67289328  | -0,730778808 | 0,057885528 |  |
| 203024_s_at  | C5orf15           | 3,568395593  | 3,510542997  | 0,057852597 |  |
| 217520_x_at  | LOC283683 /// LOC | 2,266015882  | 2,208167653  | 0,057848229 |  |
| 203428_s_at  | ASF1A             | 3,645356455  | 3,587527995  | 0,05782846  |  |
| 244352_at    | CD84              | 0,682279745  | 0,624460759  | 0,057818986 |  |
| 214316_x_at  | CALR              | 1,360921491  | 1,303116084  | 0,057805407 |  |
| 216250_s_at  | LPXN              | 1,360921491  | 1,303116084  | 0,057805407 |  |
| 218596_at    | TBC1D13           | 1,360921491  | 1,303116084  | 0,057805407 |  |
| 224187_x_at  | HSPA8 /// SNOR    | 7,633728589  | 7,575927406  | 0,057801182 |  |
| 224430_s_at  | MTO1              | 3,170152481  | 3,112391743  | 0,057760738 |  |
| 224932_at    | CHCHD10           | 3,950863319  | 3,893176339  | 0,057686981 |  |
| 1552472_a_at | ACAP2             | 1,373456798  | 1,315948728  | 0,05750807  |  |
| 225341_at    | MTERFD3           | 1,373456798  | 1,315948728  | 0,05750807  |  |
| 235745_at    | ERN1              | 0,695652136  | 0,638150376  | 0,05750176  |  |
| 209024_s_at  | SYNCRIP           | 5,168258855  | 5,110759903  | 0,057498952 |  |

|              |                 |              |              |             |  |
|--------------|-----------------|--------------|--------------|-------------|--|
| 200725_x_at  | RPL10 /// SNORA | 7,286702126  | 7,229237793  | 0,057464333 |  |
| 212391_x_at  | RPS3A /// SNOR  | 8,179552493  | 8,122090785  | 0,057461708 |  |
| 212179_at    | PNISR           | 2,901063789  | 2,843651104  | 0,057412685 |  |
| 205094_at    | PEX12           | 2,185368281  | 2,127967638  | 0,057400643 |  |
| 218958_at    | C19orf60        | 1,187200746  | 1,129843209  | 0,057357537 |  |
| 218683_at    | PTBP2           | 2,288253583  | 2,230931691  | 0,057321891 |  |
| 221689_s_at  | PIGP            | 4,490086298  | 4,432769076  | 0,057317222 |  |
| 205881_at    | ZNF74           | 1,381753566  | 1,324440845  | 0,057312721 |  |
| 221135_s_at  | ASTE1           | 1,381753566  | 1,324440845  | 0,057312721 |  |
| 224722_at    | MIB1            | 1,381753566  | 1,324440845  | 0,057312721 |  |
| 207831_x_at  | DHPS            | 4,136978698  | 4,079673902  | 0,057304796 |  |
| 217994_x_at  | CPSF3L          | 2,382221458  | 2,324919719  | 0,057301739 |  |
| 203974_at    | HDHD1           | 4,55296954   | 4,495687112  | 0,057282428 |  |
| 218005_at    | ZNF22           | 2,845159691  | 2,787940144  | 0,057219547 |  |
| 231931_at    | PRDM15          | 1,556829052  | 1,499637023  | 0,057192029 |  |
| 225733_at    | B3GALT6         | 2,294858597  | 2,237691445  | 0,057167152 |  |
| 239102_s_at  | -               | 2,089851283  | 2,032717854  | 0,057133429 |  |
| 225520_at    | MTHFD1L         | 2,2992452    | 2,242180416  | 0,057064785 |  |
| 236594_at    | LLGL1           | 2,2992452    | 2,242180416  | 0,057064785 |  |
| 211613_s_at  | GPD2            | -0,022466681 | -0,079522948 | 0,057056268 |  |
| 217684_at    | TYMS            | -0,022466681 | -0,079522948 | 0,057056268 |  |
| 206139_at    | PI4KB           | 0,715481152  | 0,658444279  | 0,057036872 |  |
| 214177_s_at  | PBXIP1          | 0,715481152  | 0,658444279  | 0,057036872 |  |
| 1552689_at   | CASKIN1         | 1,201332287  | 1,144305291  | 0,057026996 |  |
| 202725_at    | POLR2A          | 2,305800198  | 2,248887791  | 0,056912407 |  |
| 1552490_at   | LACE1           | -0,622910612 | -0,679763839 | 0,056853227 |  |
| 1557479_at   | FAM212B         | -0,622910612 | -0,679763839 | 0,056853227 |  |
| 1564391_at   | -               | -0,622910612 | -0,679763839 | 0,056853227 |  |
| 211263_s_at  | PCSK6           | -0,622910612 | -0,679763839 | 0,056853227 |  |
| 213143_at    | C2orf72         | -0,622910612 | -0,679763839 | 0,056853227 |  |
| 214147_at    | HEATR8          | -0,622910612 | -0,679763839 | 0,056853227 |  |
| 214619_at    | CRHR1           | -0,622910612 | -0,679763839 | 0,056853227 |  |
| 215243_s_at  | GJB3            | -0,622910612 | -0,679763839 | 0,056853227 |  |
| 215536_at    | HLA-DQB2        | -0,622910612 | -0,679763839 | 0,056853227 |  |
| 216220_s_at  | ADORA1          | -0,622910612 | -0,679763839 | 0,056853227 |  |
| 216615_s_at  | HTR3A           | -0,622910612 | -0,679763839 | 0,056853227 |  |
| 223706_at    | C22orf23        | -0,622910612 | -0,679763839 | 0,056853227 |  |
| 226852_at    | MTA3            | -0,622910612 | -0,679763839 | 0,056853227 |  |
| 227666_at    | DCLK2           | -0,622910612 | -0,679763839 | 0,056853227 |  |
| 228140_s_at  | PPP2R2C         | -0,622910612 | -0,679763839 | 0,056853227 |  |
| 238192_at    | -               | -0,622910612 | -0,679763839 | 0,056853227 |  |
| 241326_at    | AK7             | -0,622910612 | -0,679763839 | 0,056853227 |  |
| 241840_at    | -               | -0,622910612 | -0,679763839 | 0,056853227 |  |
| 201541_s_at  | ZNHIT1          | 4,209852334  | 4,15302303   | 0,056829304 |  |
| 217905_at    | MCMBP           | 1,210676994  | 1,153866761  | 0,056810233 |  |
| 226598_s_at  | GTPBP5          | 1,210676994  | 1,153866761  | 0,056810233 |  |
| 228093_at    | ZNF599          | 2,796341835  | 2,739547836  | 0,056793999 |  |
| 1554016_a_at | C16orf57        | 1,575032557  | 1,518263577  | 0,056768979 |  |
| 40640_at     | NCAPH2          | 0,405440979  | 0,348681268  | 0,056759711 |  |
| 218257_s_at  | UGGT1           | 1,406361373  | 1,349621332  | 0,056740041 |  |
| 225277_at    | SLC39A13        | 0,728550685  | 0,67181667   | 0,056734015 |  |
| 212652_s_at  | SNX4            | 3,994121175  | 3,937445604  | 0,056675572 |  |
| 1561969_at   | ZPLD1           | 4,713590151  | 4,656929558  | 0,056660593 |  |
| 224936_at    | EIF2S3          | 5,713123031  | 5,656556785  | 0,056566246 |  |
| 229573_at    | USP9X           | 1,414471577  | 1,3579181    | 0,056553477 |  |
| 213951_s_at  | PSMC3IP         | 2,114952142  | 2,058399602  | 0,05655254  |  |

|              |                |             |              |             |  |
|--------------|----------------|-------------|--------------|-------------|--|
| 31874_at     | GAS2L1         | 2,700931419 | 2,644402192  | 0,056529227 |  |
| 1553613_s_at | FOXC1          | 1,224581536 | 1,16809119   | 0,056490345 |  |
| 220476_s_at  | FAM212B        | 1,224581536 | 1,16809119   | 0,056490345 |  |
| 217740_x_at  | RPL7A /// SNOR | 7,741036171 | 7,684588869  | 0,056447302 |  |
| 219937_at    | TRHDE          | 2,327437554 | 2,271023131  | 0,056414423 |  |
| 229394_s_at  | ARHGAP35       | 3,913439491 | 3,857048799  | 0,056390692 |  |
| 202197_at    | MTMR3          | 2,422991296 | 2,366632651  | 0,056358645 |  |
| 203696_s_at  | RFC2           | 3,123915073 | 3,067567462  | 0,056347611 |  |
| 232219_x_at  | USP21          | 1,883312263 | 1,826973888  | 0,056338375 |  |
| 214061_at    | WDR67          | 2,745814053 | 2,689475799  | 0,056338254 |  |
| 212042_x_at  | RPL7           | 7,801859754 | 7,745538886  | 0,056320868 |  |
| 209811_at    | CASP2          | 2,331726354 | 2,275409734  | 0,05631662  |  |
| 205208_at    | ALDH1L1        | 0,747935635 | 0,691645685  | 0,05628995  |  |
| 235855_at    | COX15          | 0,747935635 | 0,691645685  | 0,05628995  |  |
| 202476_s_at  | LOC100506167 / | 1,426552034 | 1,370274469  | 0,056277565 |  |
| 222554_s_at  | NOL6           | 1,426552034 | 1,370274469  | 0,056277565 |  |
| 234084_x_at  | -              | 1,426552034 | 1,370274469  | 0,056277565 |  |
| 222199_s_at  | BIN3           | 3,127619759 | 3,071356473  | 0,056263286 |  |
| 230029_x_at  | UBR3           | 4,802411098 | 4,746152168  | 0,05625893  |  |
| 221524_s_at  | RRAGD          | 4,637680685 | 4,581441196  | 0,056239488 |  |
| 225820_at    | PHF17          | 2,014487247 | 1,958277216  | 0,056210031 |  |
| 1553063_at   | GPR78          | -0,59053611 | -0,646746079 | 0,056209968 |  |
| 1562219_at   | FLJ41649       | -0,59053611 | -0,646746079 | 0,056209968 |  |
| 1569959_at   | -              | -0,59053611 | -0,646746079 | 0,056209968 |  |
| 205701_at    | IPO8           | -0,59053611 | -0,646746079 | 0,056209968 |  |
| 205785_at    | ITGAM          | -0,59053611 | -0,646746079 | 0,056209968 |  |
| 210699_at    | -              | -0,59053611 | -0,646746079 | 0,056209968 |  |
| 215530_at    | FANCA          | -0,59053611 | -0,646746079 | 0,056209968 |  |
| 227620_at    | SLC44A1        | -0,59053611 | -0,646746079 | 0,056209968 |  |
| 235653_s_at  | THAP6          | -0,59053611 | -0,646746079 | 0,056209968 |  |
| 239076_at    | -              | -0,59053611 | -0,646746079 | 0,056209968 |  |
| 240005_at    | -              | -0,59053611 | -0,646746079 | 0,056209968 |  |
| 241443_at    | -              | -0,59053611 | -0,646746079 | 0,056209968 |  |
| 228956_at    | UGT8           | 1,434549838 | 1,378453643  | 0,056096194 |  |
| 227983_at    | RILPL2         | 2,758612869 | 2,702564916  | 0,056047953 |  |
| 229743_at    | ZNF438         | 0,760715727 | 0,704715219  | 0,056000508 |  |
| 202692_s_at  | UBTF           | 1,247462054 | 1,191491281  | 0,055970773 |  |
| 227396_at    | LOC100287223 / | 1,247462054 | 1,191491281  | 0,055970773 |  |
| 232983_s_at  | SERGEF         | 1,247462054 | 1,191491281  | 0,055970773 |  |
| 204362_at    | SKAP2          | 3,249366227 | 3,193438316  | 0,055927911 |  |
| 212937_s_at  | COL6A1         | 0,03125738  | -0,024572586 | 0,055829966 |  |
| 215413_at    | EXOC7          | 0,03125738  | -0,024572586 | 0,055829966 |  |
| 227251_at    | DCAF5          | 0,03125738  | -0,024572586 | 0,055829966 |  |
| 235285_at    | -              | 0,03125738  | -0,024572586 | 0,055829966 |  |
| 239056_at    | SEC22C         | 0,03125738  | -0,024572586 | 0,055829966 |  |
| 1555411_a_at | CCNL1          | 3,354274239 | 3,298466943  | 0,055807295 |  |
| 222395_s_at  | UBE2Z          | 3,149650293 | 3,09388391   | 0,055766383 |  |
| 200064_at    | HSP90AB1       | 7,236871635 | 7,181245959  | 0,055625676 |  |
| 233943_x_at  | PLEKHA8        | 0,779676066 | 0,724100169  | 0,055575896 |  |
| 213105_s_at  | TSR3           | 2,26825514  | 2,212749286  | 0,055505854 |  |
| 226055_at    | ARRDC2         | 1,269985355 | 1,214517879  | 0,055467476 |  |
| 1555793_a_at | ZFP82          | 3,462861802 | 3,407399455  | 0,055462347 |  |
| 217168_s_at  | HERPUD1        | 3,36999832  | 3,314541423  | 0,055456897 |  |
| 202300_at    | HBXIP          | 5,156973692 | 5,101525193  | 0,055448499 |  |
| 227284_at    | ZNF766         | 3,32445605  | 3,269073685  | 0,055382365 |  |
| 214715_x_at  | ZNF160         | 3,926967479 | 3,871608557  | 0,055358922 |  |

|              |                   |              |              |             |  |
|--------------|-------------------|--------------|--------------|-------------|--|
| 221918_at    | CDK17             | 3,467741468  | 3,412387088  | 0,05535438  |  |
| 226233_at    | B3GALNT2          | 3,052955227  | 2,997606395  | 0,055348831 |  |
| 236814_at    | MDM4              | 3,598072957  | 3,542741726  | 0,055331231 |  |
| 221648_s_at  | AGMAT             | 3,423218668  | 3,367892567  | 0,055326101 |  |
| 225098_at    | ABI2              | 2,37600538   | 2,320681318  | 0,055324062 |  |
| 203459_s_at  | VPS16             | 2,791679321  | 2,7363693    | 0,055310021 |  |
| 211899_s_at  | TRAF4             | 0,792179257  | 0,73688026   | 0,055298996 |  |
| 213616_at    | TPGS2             | 2,171078719  | 2,115788273  | 0,055290446 |  |
| 203984_s_at  | CASP9             | 3,171349466  | 3,116064987  | 0,055284479 |  |
| 222809_x_at  | CCDC85C           | 1,473887017  | 1,418668082  | 0,055218935 |  |
| 233140_s_at  | C14orf133         | 1,473887017  | 1,418668082  | 0,055218935 |  |
| 225716_at    | BRI3BP            | 3,967495801  | 3,912315453  | 0,055180348 |  |
| 201514_s_at  | G3BP1             | 4,076291169  | 4,021126974  | 0,055164195 |  |
| 209412_at    | TRAPPC10          | 3,062018438  | 3,006869115  | 0,055149323 |  |
| 222099_s_at  | LSM14A            | 3,686960673  | 3,631821253  | 0,05513942  |  |
| 201066_at    | CYC1              | 5,754941599  | 5,699830898  | 0,055110701 |  |
| 209658_at    | CDC16             | 3,837056482  | 3,781960839  | 0,055095643 |  |
| 209358_at    | TAF11             | 4,412743794  | 4,357702907  | 0,055040887 |  |
| 225794_s_at  | C22orf32          | 3,611363461  | 3,556324192  | 0,055039269 |  |
| 228158_at    | LOC645166 /// LOC | 2,182996494  | 2,127967638  | 0,055028856 |  |
| 225312_at    | COMMD6            | 5,278173421  | 5,223170799  | 0,055002622 |  |
| 210958_s_at  | MAST4             | 1,485482016  | 1,43051703   | 0,054964985 |  |
| 213144_at    | GOSR2             | 1,485482016  | 1,43051703   | 0,054964985 |  |
| 218765_at    | SIDT2             | 1,485482016  | 1,43051703   | 0,054964985 |  |
| 91580_at     | LRTM1             | -2,887413183 | -2,942256703 | 0,05484352  |  |
| 202884_s_at  | PPP2R1B           | 1,814495998  | 1,759685182  | 0,054810816 |  |
| 208640_at    | RAC1              | 6,0549968    | 6,00019003   | 0,05480677  |  |
| 226820_at    | ZNF362            | 1,954567604  | 1,899812471  | 0,054755133 |  |
| 227698_s_at  | RAB40C            | 1,954567604  | 1,899812471  | 0,054755133 |  |
| 212605_s_at  | -                 | 2,954882186  | 2,900133867  | 0,054748319 |  |
| 206016_at    | CCDC22            | 2,817903185  | 2,763166224  | 0,054736961 |  |
| 208952_s_at  | LARP4B            | 2,817903185  | 2,763166224  | 0,054736961 |  |
| 208515_at    | HIST1H2BM         | 0,083054335  | 0,028364014  | 0,05469032  |  |
| 217555_at    | SMC1A             | 0,083054335  | 0,028364014  | 0,05469032  |  |
| 238642_at    | ANKRD13D          | 0,083054335  | 0,028364014  | 0,05469032  |  |
| 200657_at    | SLC25A5           | 6,783815538  | 6,72913132   | 0,054684218 |  |
| 1552665_at   | LOC84989          | -0,512251684 | -0,566887459 | 0,054635775 |  |
| 1556732_at   | EML4              | -0,512251684 | -0,566887459 | 0,054635775 |  |
| 1559121_s_at | -                 | -0,512251684 | -0,566887459 | 0,054635775 |  |
| 204431_at    | TLE2              | -0,512251684 | -0,566887459 | 0,054635775 |  |
| 212551_at    | CAP2              | -0,512251684 | -0,566887459 | 0,054635775 |  |
| 213484_at    | -                 | -0,512251684 | -0,566887459 | 0,054635775 |  |
| 215169_at    | SLC35E2           | -0,512251684 | -0,566887459 | 0,054635775 |  |
| 230184_at    | LOC100506421      | -0,512251684 | -0,566887459 | 0,054635775 |  |
| 230898_at    | -                 | -0,512251684 | -0,566887459 | 0,054635775 |  |
| 233189_at    | -                 | -0,512251684 | -0,566887459 | 0,054635775 |  |
| 237948_at    | -                 | -0,512251684 | -0,566887459 | 0,054635775 |  |
| 243297_at    | -                 | -0,512251684 | -0,566887459 | 0,054635775 |  |
| 244486_at    | PINK1-AS          | -0,512251684 | -0,566887459 | 0,054635775 |  |
| 229989_at    | FDXACB1           | 0,822971223  | 0,768343791  | 0,054627433 |  |
| 215273_s_at  | TADA3             | 2,825526235  | 2,770953871  | 0,054572364 |  |
| 214538_x_at  | RGS6              | 1,504602299  | 1,450051551  | 0,054550748 |  |
| 226048_at    | MAPK8             | 1,504602299  | 1,450051551  | 0,054550748 |  |
| 215933_s_at  | HHEX              | 5,074765177  | 5,02022104   | 0,054544137 |  |
| 207253_s_at  | UBN1              | 1,829737795  | 1,775255987  | 0,054481808 |  |
| 212733_at    | KIAA0226          | 3,508091848  | 3,453616097  | 0,054475751 |  |



|              |                 |             |              |             |  |
|--------------|-----------------|-------------|--------------|-------------|--|
| 214805_at    | EIF4A1          | 2,094906514 | 2,040470494  | 0,05443602  |  |
| 211212_s_at  | ORC5            | 2,213529682 | 2,159161028  | 0,054368654 |  |
| 203095_at    | MTIF2           | 4,346467354 | 4,292109123  | 0,054358231 |  |
| 200829_x_at  | ZNF207          | 5,704983859 | 5,650659434  | 0,054324425 |  |
| 224736_at    | CCAR1           | 4,244385102 | 4,190088544  | 0,054296558 |  |
| 225149_at    | PCID2           | 2,604089881 | 2,549796788  | 0,054293093 |  |
| 205322_s_at  | MTF1            | 0,841135803 | 0,786897721  | 0,054238082 |  |
| 219931_s_at  | KLHL12          | 0,841135803 | 0,786897721  | 0,054238082 |  |
| 210022_at    | PCGF1           | 1,326951551 | 1,272721751  | 0,0542298   |  |
| 211902_x_at  | YME1L1          | 1,326951551 | 1,272721751  | 0,0542298   |  |
| 244033_at    | CEP128          | 2,220484971 | 2,166264721  | 0,05422025  |  |
| 211997_x_at  | H3F3A /// H3F3B | 6,729643419 | 6,675478115  | 0,054165304 |  |
| 218231_at    | NAGK            | 3,109000457 | 3,05486507   | 0,054135387 |  |
| 225414_at    | RNF149          | 3,433232044 | 3,379145507  | 0,054086537 |  |
| 204441_s_at  | POLA2           | 2,696781084 | 2,64270545   | 0,054075634 |  |
| 200787_s_at  | PEA15           | 1,850809354 | 1,796776588  | 0,054032767 |  |
| 224450_s_at  | RIOK1           | 4,256842836 | 4,202810939  | 0,054031897 |  |
| 204427_s_at  | TMED2           | 4,461505382 | 4,407512498  | 0,053992885 |  |
| 201682_at    | PMPCB           | 4,79776819  | 4,743779817  | 0,053988373 |  |
| 226091_s_at  | MRFAP1          | 6,509226384 | 6,455258381  | 0,053968003 |  |
| 204000_at    | GNB5            | 0,533835206 | 0,479907041  | 0,053928165 |  |
| 229514_at    | C14orf118       | 0,533835206 | 0,479907041  | 0,053928165 |  |
| 1555460_a_at | SLC39A6         | 1,119359127 | 1,065442793  | 0,053916334 |  |
| 220558_x_at  | TSPAN32         | 1,534677255 | 1,480766833  | 0,053910422 |  |
| 225064_at    | RABEP1          | 2,44295215  | 2,389070873  | 0,053881276 |  |
| 205120_s_at  | SGCB            | 0,859074518 | 0,805216064  | 0,053858454 |  |
| 222772_at    | MYEF2           | 0,859074518 | 0,805216064  | 0,053858454 |  |
| 222947_at    | LOC100379224    | 0,859074518 | 0,805216064  | 0,053858454 |  |
| 209085_x_at  | RFC1            | 2,931053371 | 2,877228323  | 0,053825048 |  |
| 221742_at    | CELF1           | 2,630440446 | 2,576704359  | 0,053736087 |  |
| 226431_at    | FAM117B         | 3,298397722 | 3,244672787  | 0,053724935 |  |
| 202252_at    | RAB13           | 5,271770432 | 5,218052609  | 0,053717823 |  |
| 216570_x_at  | -               | 5,599558436 | 5,545849527  | 0,053708908 |  |
| 200659_s_at  | PHB             | 4,099113343 | 4,045409633  | 0,05370371  |  |
| 200018_at    | LOC100508408 /  | 7,798934377 | 7,745291843  | 0,053642534 |  |
| 212493_s_at  | SETD2           | 3,191547726 | 3,137910193  | 0,053637533 |  |
| 1557656_at   | LOC400238       | 0,133056859 | 0,079428135  | 0,053628723 |  |
| 1560049_at   | -               | 0,133056859 | 0,079428135  | 0,053628723 |  |
| 210106_at    | BLOC1S1-RDH5    | 0,133056859 | 0,079428135  | 0,053628723 |  |
| 1556283_s_at | FGFR1OP2        | 0,87091093  | 0,817300337  | 0,053610593 |  |
| 202390_s_at  | HTT             | 0,87091093  | 0,817300337  | 0,053610593 |  |
| 213931_at    | ID2 /// ID2B    | 0,87091093  | 0,817300337  | 0,053610593 |  |
| 223289_s_at  | USP38           | 2,250242994 | 2,196649505  | 0,053593489 |  |
| 212629_s_at  | PKN2            | 1,874520207 | 1,820984782  | 0,053535425 |  |
| 217760_at    | TRIM44          | 3,19743497  | 3,14392006   | 0,05351491  |  |
| 202374_s_at  | AURKAPS1 /// R  | 2,361396186 | 2,307890888  | 0,053505298 |  |
| 200012_x_at  | RPL21 /// RPL21 | 7,878888799 | 7,825397356  | 0,053491443 |  |
| 218592_s_at  | CECR5           | 2,55541096  | 2,501934108  | 0,053476852 |  |
| 218027_at    | MRPL15          | 5,533838503 | 5,480385464  | 0,053453039 |  |
| 238856_s_at  | PANK2           | 1,369290453 | 1,315948728  | 0,053341725 |  |
| 202388_at    | RGS2            | 5,207586495 | 5,154281832  | 0,053304663 |  |
| 218134_s_at  | RBM22           | 4,236401075 | 4,183101476  | 0,053299599 |  |
| 225676_s_at  | DCAF13          | 6,085475914 | 6,032214748  | 0,053261166 |  |
| 201759_at    | TBCD            | 0,888485433 | 0,835239052  | 0,053246381 |  |
| 212830_at    | MEGF9           | 0,888485433 | 0,835239052  | 0,053246381 |  |
| 1566084_at   | -               | -0,43775896 | -0,490927335 | 0,053168375 |  |

|              |                 |             |              |             |  |
|--------------|-----------------|-------------|--------------|-------------|--|
| 204055_s_at  | CTAGE5          | -0,43775896 | -0,490927335 | 0,053168375 |  |
| 221892_at    | H6PD            | -0,43775896 | -0,490927335 | 0,053168375 |  |
| 240975_x_at  | RBFOX3          | -0,43775896 | -0,490927335 | 0,053168375 |  |
| 234156_at    | -               | 0,57058931  | 0,51742585   | 0,05316346  |  |
| 238975_at    | MMAB            | 0,57058931  | 0,51742585   | 0,05316346  |  |
| 227109_at    | CYP2R1          | 3,383488593 | 3,330438773  | 0,05304982  |  |
| 202873_at    | ATP6V1C1        | 0,900083947 | 0,847075464  | 0,053008484 |  |
| 220438_at    | QPCTL           | 0,900083947 | 0,847075464  | 0,053008484 |  |
| 242371_x_at  | -               | 1,390002893 | 1,337086025  | 0,052916869 |  |
| 230030_at    | HS6ST2          | 2,976955384 | 2,924079008  | 0,052876376 |  |
| 223259_at    | ORMDL3          | 1,912238072 | 1,859476797  | 0,052761275 |  |
| 223097_at    | ADPRHL2         | 3,234554895 | 3,181801492  | 0,052753403 |  |
| 204305_at    | MIPEP           | 1,05337236  | 1,000684521  | 0,052687838 |  |
| 215038_s_at  | SETD2           | 1,40228911  | 1,349621332  | 0,052667778 |  |
| 222557_at    | STMN3           | 3,595400101 | 3,542741726  | 0,052658374 |  |
| 210063_at    | SARDH           | 0,181384709 | 0,128747141  | 0,052637569 |  |
| 226401_at    | PARP10          | 0,181384709 | 0,128747141  | 0,052637569 |  |
| 239437_at    | -               | 0,181384709 | 0,128747141  | 0,052637569 |  |
| 242826_at    | -               | 0,181384709 | 0,128747141  | 0,052637569 |  |
| 226575_at    | ZNF462          | 1,596577845 | 1,543943227  | 0,052634618 |  |
| 213435_at    | SATB2           | 4,154032218 | 4,101455318  | 0,0525769   |  |
| 222552_at    | GOLT1B          | 3,245961699 | 3,193438316  | 0,052523383 |  |
| 209345_s_at  | PI4K2A          | 3,462861802 | 3,410394103  | 0,052467699 |  |
| 1569346_a_at | -               | 0,606430281 | 0,553993624  | 0,052436657 |  |
| 203151_at    | MAP1A           | 0,928678725 | 0,876248481  | 0,052430244 |  |
| 222114_x_at  | WDR55           | 0,928678725 | 0,876248481  | 0,052430244 |  |
| 228883_at    | TUB             | 0,928678725 | 0,876248481  | 0,052430244 |  |
| 225707_at    | ARL6IP6         | 4,099113343 | 4,046693299  | 0,052420044 |  |
| 202731_at    | MIR4680 /// PDC | 3,251631457 | 3,199221717  | 0,05240974  |  |
| 201821_s_at  | TIMM17A         | 4,987757501 | 4,935446463  | 0,052311038 |  |
| 222848_at    | CENPK           | 3,420201053 | 3,367892567  | 0,052308486 |  |
| 208636_at    | ACTN1           | 6,105025837 | 6,05272386   | 0,052301977 |  |
| 214211_at    | FTH1            | 4,136978698 | 4,084681583  | 0,052297115 |  |
| 202626_s_at  | LYN             | 4,341690695 | 4,289400623  | 0,052290072 |  |
| 202323_s_at  | ACBD3           | 1,614289682 | 1,562009954  | 0,052279728 |  |
| 211713_x_at  | KIAA0101        | 2,31665944  | 2,264418116  | 0,052241323 |  |
| 222921_s_at  | HEY2            | 1,940595304 | 1,888402606  | 0,052192698 |  |
| 226563_at    | SMAD2           | 1,940595304 | 1,888402606  | 0,052192698 |  |
| 216231_s_at  | B2M             | 7,210913811 | 7,158791135  | 0,052122676 |  |
| 226451_at    | FDX1L           | 4,55296954  | 4,500847519  | 0,052122022 |  |
| 223306_at    | EBPL            | 5,194399796 | 5,142323515  | 0,052076281 |  |
| 214951_at    | SLC26A10        | 0,209623097 | 0,157549243  | 0,052073854 |  |
| 223726_at    | KCNH3           | 0,209623097 | 0,157549243  | 0,052073854 |  |
| 228402_at    | ZBED3           | 0,209623097 | 0,157549243  | 0,052073854 |  |
| 239101_at    | ITCH            | 0,209623097 | 0,157549243  | 0,052073854 |  |
| 239740_at    | ETV6            | 0,209623097 | 0,157549243  | 0,052073854 |  |
| 211355_x_at  | LEPR            | 1,62481334  | 1,572742379  | 0,052070961 |  |
| 201694_s_at  | EGR1            | 4,458566876 | 4,406512977  | 0,0520539   |  |
| 226720_at    | PWWP2A          | 2,535098095 | 2,483094137  | 0,052003959 |  |
| 201804_x_at  | TBCB            | 6,175319908 | 6,123320246  | 0,051999662 |  |
| 208854_s_at  | STK24           | 3,584658878 | 3,532699346  | 0,051959532 |  |
| 225194_at    | PLRG1           | 4,440809032 | 4,388908328  | 0,051900704 |  |
| 211542_x_at  | RPS10           | 8,200113584 | 8,14822477   | 0,051888814 |  |
| 221549_at    | GRWD1           | 2,804079361 | 2,752192409  | 0,051886952 |  |
| 220387_s_at  | HHLA3           | 0,95671774  | 0,904843258  | 0,051874482 |  |
| 223049_at    | GRB2            | 3,805796305 | 3,753943043  | 0,051853262 |  |

|              |                 |              |             |             |  |
|--------------|-----------------|--------------|-------------|-------------|--|
| 201379_s_at  | TPD52L2         | 4,128375743  | 4,076535251 | 0,051840492 |  |
| 210456_at    | PCYT1B          | -0,366776884 | -0,41858459 | 0,051807706 |  |
| 234811_at    | CENPN           | -0,366776884 | -0,41858459 | 0,051807706 |  |
| 237993_at    | CHCHD5          | -0,366776884 | -0,41858459 | 0,051807706 |  |
| 242997_at    | -               | -0,366776884 | -0,41858459 | 0,051807706 |  |
| 208930_s_at  | ILF3            | 4,311608545  | 4,259820154 | 0,051788391 |  |
| 218626_at    | EIF4ENIF1       | 3,032022986  | 2,980244813 | 0,051778173 |  |
| 203141_s_at  | AP3B1           | 0,641402394  | 0,589657387 | 0,051745008 |  |
| 205019_s_at  | VIPR1           | 0,641402394  | 0,589657387 | 0,051745008 |  |
| 222451_s_at  | ZDHHC9          | 0,641402394  | 0,589657387 | 0,051745008 |  |
| 241799_x_at  | -               | 0,641402394  | 0,589657387 | 0,051745008 |  |
| 227000_at    | C7orf41         | 0,228146222  | 0,176436073 | 0,051710148 |  |
| 233941_at    | C14orf166B      | 0,228146222  | 0,176436073 | 0,051710148 |  |
| 235226_at    | CDK19           | 0,228146222  | 0,176436073 | 0,051710148 |  |
| 218096_at    | AGPAT5          | 6,113145999  | 6,061481705 | 0,051664294 |  |
| 204617_s_at  | ACD             | 2,646022818  | 2,594367918 | 0,0516549   |  |
| 221711_s_at  | BABAM1          | 4,265835914  | 4,214280195 | 0,051555719 |  |
| 218471_s_at  | BBS1            | 0,97328325   | 0,921731975 | 0,051551275 |  |
| 229926_at    | MIR3682         | 0,97328325   | 0,921731975 | 0,051551275 |  |
| 209497_s_at  | RBM4B           | 1,973904239  | 1,922365006 | 0,051539232 |  |
| 210555_s_at  | NFATC3          | 2,822481847  | 2,770953871 | 0,051527976 |  |
| 226041_at    | NAPEPLD         | 1,462198073  | 1,410714371 | 0,051483702 |  |
| 218896_s_at  | C17orf85        | 2,562727117  | 2,511262629 | 0,051464488 |  |
| 212165_at    | TMEM183A /// TM | 4,179835245  | 4,128379201 | 0,051456044 |  |
| 209861_s_at  | METAP2          | 5,491099517  | 5,439680874 | 0,051418643 |  |
| 223256_at    | G2E3            | 2,745814053  | 2,694398145 | 0,051415908 |  |
| 235198_at    | OSTM1           | 1,982112682  | 1,930732138 | 0,051380545 |  |
| 208867_s_at  | CSNK1A1         | 3,789518787  | 3,738139229 | 0,051379558 |  |
| 242335_at    | SLC25A37        | 3,518475927  | 3,467101363 | 0,051374563 |  |
| 213875_x_at  | C6orf62         | 3,949468585  | 3,898162764 | 0,051305821 |  |
| 202630_at    | APPBP2          | 1,987559146  | 1,936283387 | 0,051275759 |  |
| 202824_s_at  | TCEB1           | 6,387174329  | 6,335907096 | 0,051267233 |  |
| 224908_s_at  | TTL             | 1,666156729  | 1,614891062 | 0,051265667 |  |
| 225370_at    | PYGO2           | 1,251994932  | 1,200746069 | 0,051248863 |  |
| 228929_at    | DNASE1          | 0,255492549  | 0,204310755 | 0,051181794 |  |
| 225480_at    | C1orf122        | 3,715139632  | 3,663961904 | 0,051177727 |  |
| 209989_at    | ZNF268          | 1,841816345  | 1,790660532 | 0,051155813 |  |
| 200761_s_at  | ARL6IP5         | 3,842326541  | 3,79118048  | 0,051146061 |  |
| 209149_s_at  | TM9SF1          | 2,997346717  | 2,946258252 | 0,051088465 |  |
| 213632_at    | DHODH           | 0,67554678   | 0,624460759 | 0,051086021 |  |
| 221218_s_at  | TPK1            | 0,67554678   | 0,624460759 | 0,051086021 |  |
| 232520_s_at  | NSFL1C          | 4,653613789  | 4,602542772 | 0,051071017 |  |
| 211445_x_at  | NACAP1          | 4,830716841  | 4,779734028 | 0,050982813 |  |
| 1552486_s_at | LACTB           | 2,382221458  | 2,331254065 | 0,050967393 |  |
| 201738_at    | EIF1B           | 6,032613215  | 5,981685722 | 0,050927492 |  |
| 201987_at    | MED13           | 4,006916639  | 3,956010056 | 0,050906583 |  |
| 208929_x_at  | RPL13 /// SNOR  | 7,201350934  | 7,150456898 | 0,050894036 |  |
| 206485_at    | CD5             | 0,273439642  | 0,222599095 | 0,050840547 |  |
| 209913_x_at  | AP5Z1           | 0,273439642  | 0,222599095 | 0,050840547 |  |
| 224035_s_at  | BCL2L13         | 0,273439642  | 0,222599095 | 0,050840547 |  |
| 232785_at    | RGAG1           | 0,273439642  | 0,222599095 | 0,050840547 |  |
| 242079_at    | RGS12           | 0,273439642  | 0,222599095 | 0,050840547 |  |
| 200620_at    | TMEM59          | 4,181024227  | 4,130196752 | 0,050827475 |  |
| 232221_x_at  | RSBN1L          | 1,274448124  | 1,223626587 | 0,050821537 |  |
| 226331_at    | BBX             | 2,277177578  | 2,226407528 | 0,05077005  |  |
| 209331_s_at  | MAX             | 3,647078281  | 3,596320795 | 0,050757486 |  |

|              |                  |              |              |             |  |
|--------------|------------------|--------------|--------------|-------------|--|
| 238765_at    | ATP6V1G1         | 1,69307511   | 1,642321262  | 0,050753848 |  |
| 231215_at    | -                | 2,503131904  | 2,452428893  | 0,050703011 |  |
| 212462_at    | KAT6B            | 3,396853889  | 3,346162854  | 0,050691036 |  |
| 231940_at    | ZNF529           | 5,123506602  | 5,072831113  | 0,050675489 |  |
| 203551_s_at  | COX11            | 2,022468633  | 1,971855016  | 0,050613617 |  |
| 207966_s_at  | GLG1             | 2,022468633  | 1,971855016  | 0,050613617 |  |
| 224332_s_at  | MRPL43           | 4,482391326  | 4,431786907  | 0,050604419 |  |
| 201184_s_at  | CHD4             | 3,831009889  | 3,780418488  | 0,050591401 |  |
| 208112_x_at  | EHD1             | 2,609398637  | 2,558821855  | 0,050576783 |  |
| 201820_at    | KRT5             | -0,299034815 | -0,34958478  | 0,050549965 |  |
| 204401_at    | KCNN4            | -0,299034815 | -0,34958478  | 0,050549965 |  |
| 211577_s_at  | IGF1             | -0,299034815 | -0,34958478  | 0,050549965 |  |
| 211637_x_at  | IGH@ /// IGHA1 / | -0,299034815 | -0,34958478  | 0,050549965 |  |
| 226489_at    | TMCC3            | -0,299034815 | -0,34958478  | 0,050549965 |  |
| 237345_at    | -                | -0,299034815 | -0,34958478  | 0,050549965 |  |
| 240098_at    | RIF1             | -0,299034815 | -0,34958478  | 0,050549965 |  |
| 225433_at    | GTF2A1           | 4,404623843  | 4,354078399  | 0,050545444 |  |
| 210820_x_at  | COQ7             | 1,512180019  | 1,461646549  | 0,05053347  |  |
| 236918_s_at  | LRRC34           | 1,027166904  | 0,976641161  | 0,050525743 |  |
| 239240_at    | -                | 1,027166904  | 0,976641161  | 0,050525743 |  |
| 204257_at    | FADS3            | 2,030406107  | 1,979940779  | 0,050465329 |  |
| 240592_at    | LCORL            | 2,030406107  | 1,979940779  | 0,050465329 |  |
| 1555950_a_at | CD55             | 4,030853795  | 3,980396806  | 0,05045699  |  |
| 218097_s_at  | CUEDC2           | 3,410096504  | 3,359653127  | 0,050443377 |  |
| 219428_s_at  | PXMP4            | 3,170152481  | 3,119728903  | 0,050423578 |  |
| 210754_s_at  | LYN              | 4,329411337  | 4,279061697  | 0,050349641 |  |
| 203456_at    | PRAF2            | 2,626954721  | 2,576704359  | 0,050250362 |  |
| 234944_s_at  | FAM54A           | 2,890927111  | 2,840694075  | 0,050233035 |  |
| 1552402_at   | CALML6           | -1,812418401 | -1,862647763 | 0,050229361 |  |
| 1554045_at   | ZNF24            | -1,812418401 | -1,862647763 | 0,050229361 |  |
| 1556663_s_at | LOC100506142     | -1,812418401 | -1,862647763 | 0,050229361 |  |
| 1558608_a_at | PAPPA            | -1,812418401 | -1,862647763 | 0,050229361 |  |
| 1560832_at   | -                | -1,812418401 | -1,862647763 | 0,050229361 |  |
| 1563379_at   | -                | -1,812418401 | -1,862647763 | 0,050229361 |  |
| 1566702_at   | -                | -1,812418401 | -1,862647763 | 0,050229361 |  |
| 206294_at    | HSD3B2           | -1,812418401 | -1,862647763 | 0,050229361 |  |
| 221624_at    | TCL6             | -1,812418401 | -1,862647763 | 0,050229361 |  |
| 224419_x_at  | PMCHL1           | -1,812418401 | -1,862647763 | 0,050229361 |  |
| 231307_at    | -                | -1,812418401 | -1,862647763 | 0,050229361 |  |
| 232719_at    | CELF4            | -1,812418401 | -1,862647763 | 0,050229361 |  |
| 234744_x_at  | -                | -1,812418401 | -1,862647763 | 0,050229361 |  |
| 235656_s_at  | -                | -1,812418401 | -1,862647763 | 0,050229361 |  |
| 236993_at    | -                | -1,812418401 | -1,862647763 | 0,050229361 |  |
| 237807_at    | SPATA12          | -1,812418401 | -1,862647763 | 0,050229361 |  |
| 241594_at    | -                | -1,812418401 | -1,862647763 | 0,050229361 |  |
| 244040_at    | KCNN3            | -1,812418401 | -1,862647763 | 0,050229361 |  |
| 214784_x_at  | XPO6             | 3,477451563  | 3,427247355  | 0,050204209 |  |
| 206445_s_at  | PRMT1            | 6,345364659  | 6,295174259  | 0,050190401 |  |
| 209163_at    | CYB561           | 1,726031811  | 1,675891488  | 0,050140323 |  |
| 206994_at    | CST4             | 0,317354302  | 0,26733076   | 0,050023542 |  |
| 230018_at    | DPP9             | 0,317354302  | 0,26733076   | 0,050023542 |  |
| 1554833_at   | MCTP2            | -1,688127507 | -1,738067356 | 0,049939849 |  |
| 1561702_at   | -                | -1,688127507 | -1,738067356 | 0,049939849 |  |
| 1562974_at   | -                | -1,688127507 | -1,738067356 | 0,049939849 |  |
| 1567285_at   | OR5L2            | -1,688127507 | -1,738067356 | 0,049939849 |  |
| 206404_at    | FGF9             | -1,688127507 | -1,738067356 | 0,049939849 |  |

|              |                 |              |              |             |  |
|--------------|-----------------|--------------|--------------|-------------|--|
| 214396_s_at  | MBD2            | -1,688127507 | -1,738067356 | 0,049939849 |  |
| 215362_at    | -               | -1,688127507 | -1,738067356 | 0,049939849 |  |
| 228371_s_at  | -               | -1,688127507 | -1,738067356 | 0,049939849 |  |
| 232766_at    | BANF2           | -1,688127507 | -1,738067356 | 0,049939849 |  |
| 236963_at    | -               | -1,688127507 | -1,738067356 | 0,049939849 |  |
| 238478_at    | BNC2            | -1,688127507 | -1,738067356 | 0,049939849 |  |
| 241096_at    | -               | -1,688127507 | -1,738067356 | 0,049939849 |  |
| 242174_at    | -               | -1,688127507 | -1,738067356 | 0,049939849 |  |
| 243448_at    | -               | -1,688127507 | -1,738067356 | 0,049939849 |  |
| 243782_at    | -               | -1,688127507 | -1,738067356 | 0,049939849 |  |
| 202722_s_at  | GFPT1           | 3,260656977  | 3,210719429  | 0,049937548 |  |
| 207769_s_at  | PQBP1           | 4,570314367  | 4,520382831  | 0,049931536 |  |
| 201937_s_at  | DNPEP           | 2,197169074  | 2,147243253  | 0,049925822 |  |
| 1569180_at   | -               | -1,912771092 | -1,962679142 | 0,04990805  |  |
| 212112_s_at  | STX12           | 2,325288363  | 2,275409734  | 0,049878629 |  |
| 223917_s_at  | SLC39A3         | 4,455131038  | 4,405262601  | 0,049868436 |  |
| 212201_at    | ANKLE2          | 1,063722698  | 1,013870809  | 0,049851889 |  |
| 214502_at    | HIST1H2BJ       | 1,742232072  | 1,692388143  | 0,049843929 |  |
| 206182_at    | ZNF134          | 2,64946283   | 2,599625088  | 0,049837742 |  |
| 1556416_s_at | -               | -2,236765673 | -2,286583451 | 0,049817778 |  |
| 1556777_a_at | -               | -2,236765673 | -2,286583451 | 0,049817778 |  |
| 1557767_at   | NANOS2          | -2,236765673 | -2,286583451 | 0,049817778 |  |
| 1561669_at   | -               | -2,236765673 | -2,286583451 | 0,049817778 |  |
| 1569042_at   | LRP1            | -2,236765673 | -2,286583451 | 0,049817778 |  |
| 1570052_at   | MIPOL1          | -2,236765673 | -2,286583451 | 0,049817778 |  |
| 213033_s_at  | NFIB            | -2,236765673 | -2,286583451 | 0,049817778 |  |
| 213862_at    | -               | -2,236765673 | -2,286583451 | 0,049817778 |  |
| 215257_at    | ERGIC3          | -2,236765673 | -2,286583451 | 0,049817778 |  |
| 216121_at    | -               | -2,236765673 | -2,286583451 | 0,049817778 |  |
| 220293_at    | CATSPERB        | -2,236765673 | -2,286583451 | 0,049817778 |  |
| 224459_at    | L2HGDH          | -2,236765673 | -2,286583451 | 0,049817778 |  |
| 229829_at    | LINC00526       | -2,236765673 | -2,286583451 | 0,049817778 |  |
| 231425_at    | PLCZ1           | -2,236765673 | -2,286583451 | 0,049817778 |  |
| 233213_at    | -               | -2,236765673 | -2,286583451 | 0,049817778 |  |
| 234320_at    | CD244           | -2,236765673 | -2,286583451 | 0,049817778 |  |
| 237126_at    | -               | -2,236765673 | -2,286583451 | 0,049817778 |  |
| 238011_at    | -               | -2,236765673 | -2,286583451 | 0,049817778 |  |
| 240250_at    | -               | -2,236765673 | -2,286583451 | 0,049817778 |  |
| 240514_at    | PGA3            | -2,236765673 | -2,286583451 | 0,049817778 |  |
| 243360_at    | -               | -2,236765673 | -2,286583451 | 0,049817778 |  |
| 1561048_at   | RARS2           | 1,556829052  | 1,507116528  | 0,049712524 |  |
| 209066_x_at  | UQCRB           | 6,465008917  | 6,415319716  | 0,049689201 |  |
| 225081_s_at  | CDCA7L          | 2,840652551  | 2,791007185  | 0,049645366 |  |
| 212578_x_at  | RPS17 /// RPS17 | 7,928534296  | 7,878896491  | 0,049637805 |  |
| 203307_at    | GNL1            | 2,755423794  | 2,705818724  | 0,04960507  |  |
| 37831_at     | SIPA1L3         | 2,800989329  | 2,751405362  | 0,049583967 |  |
| 209186_at    | ATP2A2          | 4,280885759  | 4,231314909  | 0,04957085  |  |
| 217930_s_at  | TOLLIP          | 1,758252436  | 1,708698295  | 0,049554141 |  |
| 208744_x_at  | HSPH1           | 4,082030648  | 4,032509762  | 0,049520886 |  |
| 202282_at    | HSD17B10        | 5,690863646  | 5,641343186  | 0,049520459 |  |
| 209607_x_at  | SLX1A-SULT1A3   | 1,567778694  | 1,518263577  | 0,049515116 |  |
| 218611_at    | IER5            | 3,406034785  | 3,356551164  | 0,049483621 |  |
| 218824_at    | PNMAL1          | 2,933877275  | 2,884425449  | 0,049451826 |  |
| 211061_s_at  | MGAT2           | 4,086478954  | 4,037037849  | 0,049441105 |  |
| 202126_at    | PRPF4B          | 4,647605722  | 4,598171199  | 0,049433732 |  |
| 1554589_at   | LENG9           | -0,234278768 | -0,283667828 | 0,04938906  |  |

|              |                 |              |              |             |  |
|--------------|-----------------|--------------|--------------|-------------|--|
| 202835_at    | TXNL4A          | -0,234278768 | -0,283667828 | 0,04938906  |  |
| 216909_at    | RRP12           | -0,234278768 | -0,283667828 | 0,04938906  |  |
| 220923_s_at  | PNMA3           | -0,234278768 | -0,283667828 | 0,04938906  |  |
| 227009_at    | -               | -0,234278768 | -0,283667828 | 0,04938906  |  |
| 227669_at    | BRP44           | -0,234278768 | -0,283667828 | 0,04938906  |  |
| 227839_at    | MBD5            | -0,234278768 | -0,283667828 | 0,04938906  |  |
| 230770_at    | -               | -0,234278768 | -0,283667828 | 0,04938906  |  |
| 233008_at    | LOC100507284    | -0,234278768 | -0,283667828 | 0,04938906  |  |
| 235883_at    | -               | -0,234278768 | -0,283667828 | 0,04938906  |  |
| 237144_at    | LTBP3           | -0,234278768 | -0,283667828 | 0,04938906  |  |
| 206653_at    | POLR3G          | 1,352503698  | 1,303116084  | 0,049387614 |  |
| 227638_at    | EPG5            | 1,575032557  | 1,525647381  | 0,049385176 |  |
| 209384_at    | PROSC           | 4,495830712  | 4,446449692  | 0,04938102  |  |
| 212379_at    | GART            | 4,196980309  | 4,147649355  | 0,049330954 |  |
| 1558217_at   | SLFN13          | 2,094906514  | 2,045615873  | 0,049290641 |  |
| 228073_at    | NANP            | 3,902669169  | 3,853385784  | 0,049283384 |  |
| 1559634_at   | CHRM3           | -2,359436556 | -2,408705138 | 0,049268582 |  |
| 1562230_at   | -               | -2,359436556 | -2,408705138 | 0,049268582 |  |
| 1563656_at   | -               | -2,359436556 | -2,408705138 | 0,049268582 |  |
| 1564985_a_at | SLC8A1          | -2,359436556 | -2,408705138 | 0,049268582 |  |
| 208167_s_at  | MMP16           | -2,359436556 | -2,408705138 | 0,049268582 |  |
| 208350_at    | CSN1S1          | -2,359436556 | -2,408705138 | 0,049268582 |  |
| 211083_s_at  | MAP3K13         | -2,359436556 | -2,408705138 | 0,049268582 |  |
| 211606_at    | -               | -2,359436556 | -2,408705138 | 0,049268582 |  |
| 212942_s_at  | KIAA1199        | -2,359436556 | -2,408705138 | 0,049268582 |  |
| 213438_at    | NFASC           | -2,359436556 | -2,408705138 | 0,049268582 |  |
| 216827_at    | -               | -2,359436556 | -2,408705138 | 0,049268582 |  |
| 222919_at    | TRDN            | -2,359436556 | -2,408705138 | 0,049268582 |  |
| 222943_at    | GBA3            | -2,359436556 | -2,408705138 | 0,049268582 |  |
| 222969_at    | B3GALT1         | -2,359436556 | -2,408705138 | 0,049268582 |  |
| 223633_s_at  | -               | -2,359436556 | -2,408705138 | 0,049268582 |  |
| 230563_at    | RASGEF1A        | -2,359436556 | -2,408705138 | 0,049268582 |  |
| 231381_at    | ESRG            | -2,359436556 | -2,408705138 | 0,049268582 |  |
| 231981_at    | PRLR            | -2,359436556 | -2,408705138 | 0,049268582 |  |
| 233490_at    | DCTN4           | -2,359436556 | -2,408705138 | 0,049268582 |  |
| 236184_at    | -               | -2,359436556 | -2,408705138 | 0,049268582 |  |
| 237972_at    | -               | -2,359436556 | -2,408705138 | 0,049268582 |  |
| 240868_at    | LOC100129406    | -2,359436556 | -2,408705138 | 0,049268582 |  |
| 243321_at    | -               | -2,359436556 | -2,408705138 | 0,049268582 |  |
| 1556053_at   | -               | 1,58584542   | 1,536652708  | 0,049192713 |  |
| 219507_at    | RSRC1           | 2,102456302  | 2,053299695  | 0,049156607 |  |
| 226001_at    | KLHL5           | 3,173740462  | 3,124599694  | 0,049140768 |  |
| 218497_s_at  | RNASEH1         | 3,641042878  | 3,591931093  | 0,049111785 |  |
| 202345_s_at  | FABP5           | 4,913162719  | 4,864065385  | 0,049097334 |  |
| 204675_at    | SRD5A1          | 2,369762403  | 2,320681318  | 0,049081085 |  |
| 228129_at    | SERBP1          | 2,107467633  | 2,058399602  | 0,049068032 |  |
| 224754_at    | SP1             | 2,874852734  | 2,825817328  | 0,049035406 |  |
| 208905_at    | CYCS            | 6,673146317  | 6,624111969  | 0,049034348 |  |
| 213274_s_at  | CTSB            | 1,373456798  | 1,324440845  | 0,049015953 |  |
| 219060_at    | WDYHV1          | 2,959046717  | 2,910041809  | 0,049004908 |  |
| 201776_s_at  | KIAA0494        | 2,250242994  | 2,201267805  | 0,048975189 |  |
| 217768_at    | C14orf166       | 6,723485451  | 6,674544283  | 0,048941168 |  |
| 200770_s_at  | LAMC1           | 2,380152406  | 2,331254065  | 0,048898341 |  |
| 217499_x_at  | OR7E37P         | 1,965648824  | 1,916759838  | 0,048888987 |  |
| 209430_at    | BTAF1           | 3,657366303  | 3,608541373  | 0,04882493  |  |
| 209219_at    | MIR1236 /// RDB | 3,843828743  | 3,795004675  | 0,048824068 |  |

|              |                 |              |              |             |  |
|--------------|-----------------|--------------|--------------|-------------|--|
| 212764_at    | ZEB1            | 0,384950573  | 0,336136178  | 0,048814396 |  |
| 213955_at    | MYOZ3           | 0,384950573  | 0,336136178  | 0,048814396 |  |
| 215068_s_at  | FBXL18          | 0,384950573  | 0,336136178  | 0,048814396 |  |
| 222624_s_at  | ZNF639          | 2,261526912  | 2,212749286  | 0,048777625 |  |
| 209549_s_at  | DGUOK           | 4,758484959  | 4,709745554  | 0,048739405 |  |
| 203380_x_at  | SRSF5           | 4,559384026  | 4,51064824   | 0,048735786 |  |
| 218702_at    | FBXO17 /// SARS | 2,713311265  | 2,664608955  | 0,04870231  |  |
| 205130_at    | MOK             | 1,129248302  | 1,080561626  | 0,048686676 |  |
| 222276_at    | METTL2B         | 1,129248302  | 1,080561626  | 0,048686676 |  |
| 200740_s_at  | SUMO3           | 6,50887134   | 6,460203967  | 0,048667373 |  |
| 225367_at    | PGM2            | 4,74286981   | 4,694266604  | 0,048603206 |  |
| 225848_at    | ZNF746          | 2,512607472  | 2,464004877  | 0,048602595 |  |
| 203054_s_at  | TCTA            | 1,621313976  | 1,572742379  | 0,048571597 |  |
| 214849_at    | KCTD20          | 1,814495998  | 1,765933685  | 0,048562313 |  |
| 206751_s_at  | PCYT1B          | 0,401366113  | 0,352836757  | 0,048529356 |  |
| 219337_at    | C1orf159        | 0,401366113  | 0,352836757  | 0,048529356 |  |
| 229445_at    | CYBA            | 0,401366113  | 0,352836757  | 0,048529356 |  |
| 202389_s_at  | HTT             | 1,139070151  | 1,090553537  | 0,048516614 |  |
| 212203_x_at  | IFITM3          | 6,224439428  | 6,175959986  | 0,048479442 |  |
| 238974_at    | C2orf69         | 4,952683603  | 4,904274741  | 0,048408861 |  |
| 239377_at    | EIF1AD          | 2,911129742  | 2,862725455  | 0,048404287 |  |
| 227428_at    | GABPA           | 2,52764011   | 2,479296438  | 0,048343672 |  |
| 1563147_at   | -               | -0,172274514 | -0,220592223 | 0,04831771  |  |
| 225742_at    | MDM4            | -0,172274514 | -0,220592223 | 0,04831771  |  |
| 231932_at    | -               | -0,172274514 | -0,220592223 | 0,04831771  |  |
| 240608_at    | -               | -0,172274514 | -0,220592223 | 0,04831771  |  |
| 217188_s_at  | C14orf1         | 3,41414682   | 3,365837114  | 0,048309706 |  |
| 200858_s_at  | RPS8 /// SNORD  | 6,865490682  | 6,817183247  | 0,048307435 |  |
| 229129_at    | HNRNPD          | 2,151803104  | 2,103505212  | 0,048297892 |  |
| 217979_at    | TSPAN13         | 5,896110031  | 5,847814633  | 0,048295398 |  |
| 227713_at    | KATNAL1         | 1,638726528  | 1,590454215  | 0,048272312 |  |
| 1554183_s_at | TRIM73 /// TRIM | 1,153678675  | 1,105412836  | 0,048265839 |  |
| 1562002_at   | MYOZ3           | 1,153678675  | 1,105412836  | 0,048265839 |  |
| 202415_s_at  | HSPBP1          | 3,158127685  | 3,109937707  | 0,048189978 |  |
| 1557302_at   | ZNF585B         | 4,229522279  | 4,181349409  | 0,04817287  |  |
| 217466_x_at  | RPS2 /// SNORA  | 5,732208132  | 5,684038418  | 0,048169714 |  |
| 209033_s_at  | DYRK1A          | 5,247006265  | 5,198840377  | 0,048165888 |  |
| 224643_at    | PRRC1           | 4,232392431  | 4,18426834   | 0,048124091 |  |
| 200068_s_at  | CANX            | 6,135703599  | 6,087596613  | 0,048106986 |  |
| 1558775_s_at | NSMAF           | 1,163336153  | 1,115234684  | 0,048101469 |  |
| 202397_at    | LOC128322 /// N | 5,443592265  | 5,395529292  | 0,048062972 |  |
| 213327_s_at  | USP12           | 2,750626925  | 2,702564916  | 0,048062009 |  |
| 224927_at    | PPP1R18         | 3,702775533  | 3,654731437  | 0,048044095 |  |
| 201270_x_at  | NUDCD3          | 2,546213279  | 2,498185745  | 0,048027534 |  |
| 201064_s_at  | PABPC4          | 5,519575746  | 5,471571483  | 0,048004263 |  |
| 235025_at    | WDR89           | 1,655931423  | 1,60795124   | 0,047980183 |  |
| 219940_s_at  | PCID2           | 4,240968785  | 4,192989865  | 0,04797892  |  |
| 1555553_a_at | SLC22A7         | -0,148196756 | -0,19610998  | 0,047913224 |  |
| 1563842_at   | PIGG            | -0,148196756 | -0,19610998  | 0,047913224 |  |
| 205291_at    | IL2RB           | -0,148196756 | -0,19610998  | 0,047913224 |  |
| 217074_at    | SMOX            | -0,148196756 | -0,19610998  | 0,047913224 |  |
| 237010_at    | -               | -0,148196756 | -0,19610998  | 0,047913224 |  |
| 239804_at    | -               | -0,148196756 | -0,19610998  | 0,047913224 |  |
| 238737_at    | TCEANC2         | 0,853119696  | 0,805216064  | 0,047903632 |  |
| 239078_at    | BROX            | 0,853119696  | 0,805216064  | 0,047903632 |  |
| 242434_at    | -               | 0,853119696  | 0,805216064  | 0,047903632 |  |

|              |                |             |              |             |  |
|--------------|----------------|-------------|--------------|-------------|--|
| 218031_s_at  | FOXN3          | 1,85379461  | 1,805902329  | 0,047892281 |  |
| 202092_s_at  | ARL2BP         | 3,024094427 | 2,976208448  | 0,047885979 |  |
| 225361_x_at  | FAM122B        | 4,280885759 | 4,23300737   | 0,047878389 |  |
| 230708_at    | PRICKLE1       | 2,55541096  | 2,507538456  | 0,047872504 |  |
| 204626_s_at  | ITGB3          | 1,177702228 | 1,129843209  | 0,047859019 |  |
| 207771_at    | SLC5A2         | 0,44160593  | 0,393761504  | 0,047844426 |  |
| 203303_at    | DYNLT3         | 4,214504741 | 4,16665505   | 0,047839237 |  |
| 235260_s_at  | PACRGL         | 2,027765132 | 1,979940779  | 0,047824353 |  |
| 210878_s_at  | KDM3B          | 3,188003814 | 3,140317145  | 0,047686668 |  |
| 1552322_at   | FAM122C        | -2,64318869 | -2,690860744 | 0,047672054 |  |
| 1555581_a_at | TP63           | -2,64318869 | -2,690860744 | 0,047672054 |  |
| 1556238_at   | -              | -2,64318869 | -2,690860744 | 0,047672054 |  |
| 1558852_at   | -              | -2,64318869 | -2,690860744 | 0,047672054 |  |
| 1561479_at   | -              | -2,64318869 | -2,690860744 | 0,047672054 |  |
| 1563581_at   | RPL34-AS1      | -2,64318869 | -2,690860744 | 0,047672054 |  |
| 1564198_a_at | C10orf90       | -2,64318869 | -2,690860744 | 0,047672054 |  |
| 1565826_at   | -              | -2,64318869 | -2,690860744 | 0,047672054 |  |
| 1565833_at   | -              | -2,64318869 | -2,690860744 | 0,047672054 |  |
| 1566271_x_at | RALGAPA1       | -2,64318869 | -2,690860744 | 0,047672054 |  |
| 206290_s_at  | RGS7           | -2,64318869 | -2,690860744 | 0,047672054 |  |
| 211466_at    | NFIB           | -2,64318869 | -2,690860744 | 0,047672054 |  |
| 214633_at    | SOX3           | -2,64318869 | -2,690860744 | 0,047672054 |  |
| 219764_at    | FZD10          | -2,64318869 | -2,690860744 | 0,047672054 |  |
| 224400_s_at  | CHST9          | -2,64318869 | -2,690860744 | 0,047672054 |  |
| 226281_at    | DNER           | -2,64318869 | -2,690860744 | 0,047672054 |  |
| 227629_at    | PRLR           | -2,64318869 | -2,690860744 | 0,047672054 |  |
| 228934_x_at  | -              | -2,64318869 | -2,690860744 | 0,047672054 |  |
| 229494_s_at  | PHLDA2         | -2,64318869 | -2,690860744 | 0,047672054 |  |
| 231439_at    | FAM84A         | -2,64318869 | -2,690860744 | 0,047672054 |  |
| 232444_at    | CEP85L         | -2,64318869 | -2,690860744 | 0,047672054 |  |
| 234217_at    | -              | -2,64318869 | -2,690860744 | 0,047672054 |  |
| 240186_at    | -              | -2,64318869 | -2,690860744 | 0,047672054 |  |
| 240989_at    | -              | -2,64318869 | -2,690860744 | 0,047672054 |  |
| 244678_at    | -              | -2,64318869 | -2,690860744 | 0,047672054 |  |
| 244684_at    | -              | -2,64318869 | -2,690860744 | 0,047672054 |  |
| 212296_at    | PSMD14         | 5,497078594 | 5,449419352  | 0,047659242 |  |
| 221735_at    | WDR48          | 2,190100188 | 2,14244844   | 0,047651748 |  |
| 225637_at    | DEF8           | 2,190100188 | 2,14244844   | 0,047651748 |  |
| 213258_at    | TFPI           | 4,916378816 | 4,868790444  | 0,047588372 |  |
| 226193_x_at  | CBWD1 /// CBW  | 5,403917855 | 5,35633864   | 0,047579215 |  |
| 235484_at    | PTAR1          | 1,874520207 | 1,826973888  | 0,047546318 |  |
| 228264_at    | ACCS           | 1,04816921  | 1,000684521  | 0,047484689 |  |
| 213385_at    | CHN2           | 0,46522187  | 0,417770464  | 0,047451407 |  |
| 227886_at    | IFITM10        | 0,46522187  | 0,417770464  | 0,047451407 |  |
| 1555174_at   | -              | -1,2845686  | -1,332017329 | 0,047448729 |  |
| 1558768_at   | DNAH1          | -1,2845686  | -1,332017329 | 0,047448729 |  |
| 1563243_at   | -              | -1,2845686  | -1,332017329 | 0,047448729 |  |
| 1564008_at   | COL27A1        | -1,2845686  | -1,332017329 | 0,047448729 |  |
| 201525_at    | APOD           | -1,2845686  | -1,332017329 | 0,047448729 |  |
| 207708_at    | ALOXE3         | -1,2845686  | -1,332017329 | 0,047448729 |  |
| 208178_x_at  | TRIO           | -1,2845686  | -1,332017329 | 0,047448729 |  |
| 209519_at    | NCBP1          | -1,2845686  | -1,332017329 | 0,047448729 |  |
| 214680_at    | NTRK2          | -1,2845686  | -1,332017329 | 0,047448729 |  |
| 215185_at    | LOC100128077 / | -1,2845686  | -1,332017329 | 0,047448729 |  |
| 221023_s_at  | KCNH6          | -1,2845686  | -1,332017329 | 0,047448729 |  |
| 222289_at    | KCNC2          | -1,2845686  | -1,332017329 | 0,047448729 |  |



|              |                |              |              |             |  |
|--------------|----------------|--------------|--------------|-------------|--|
| 224211_at    | FOXP3          | -1,2845686   | -1,332017329 | 0,047448729 |  |
| 226690_at    | ADCYAP1R1      | -1,2845686   | -1,332017329 | 0,047448729 |  |
| 228687_at    | ZNF777         | -1,2845686   | -1,332017329 | 0,047448729 |  |
| 229185_at    | LIFR           | -1,2845686   | -1,332017329 | 0,047448729 |  |
| 231323_at    | PSMB2          | -1,2845686   | -1,332017329 | 0,047448729 |  |
| 237589_at    | -              | -1,2845686   | -1,332017329 | 0,047448729 |  |
| 240705_at    | CYP19A1        | -1,2845686   | -1,332017329 | 0,047448729 |  |
| 241413_at    | -              | -1,2845686   | -1,332017329 | 0,047448729 |  |
| 205768_s_at  | SLC27A2        | 1,689737652  | 1,642321262  | 0,04741639  |  |
| 1557105_a_at | ZSCAN30        | 0,882651021  | 0,835239052  | 0,047411969 |  |
| 205390_s_at  | ANK1           | 1,883312263  | 1,835911187  | 0,047401076 |  |
| 214820_at    | BRWD1          | 1,883312263  | 1,835911187  | 0,047401076 |  |
| 203967_at    | CDC6           | 3,205636958  | 3,158242412  | 0,047394546 |  |
| 208966_x_at  | IFI16          | 2,206540699  | 2,159161028  | 0,047379671 |  |
| 227622_at    | PCF11          | 2,791679321  | 2,744302548  | 0,047376774 |  |
| 207425_s_at  | 40057          | -0,112808516 | -0,160136748 | 0,047328232 |  |
| 210827_s_at  | ELF3           | -0,112808516 | -0,160136748 | 0,047328232 |  |
| 212543_at    | AIM1           | -0,112808516 | -0,160136748 | 0,047328232 |  |
| 216371_at    | -              | -0,112808516 | -0,160136748 | 0,047328232 |  |
| 230950_at    | CNDP2          | -0,112808516 | -0,160136748 | 0,047328232 |  |
| 237507_at    | KRT73          | -0,112808516 | -0,160136748 | 0,047328232 |  |
| 241956_at    | -              | -0,112808516 | -0,160136748 | 0,047328232 |  |
| 242635_s_at  | NAPEPLD        | -0,112808516 | -0,160136748 | 0,047328232 |  |
| 208800_at    | SRP72          | 4,443783893  | 4,396479497  | 0,047304396 |  |
| 222421_at    | UBE2H          | 2,59162628   | 2,544354523  | 0,047271757 |  |
| 227037_at    | PLD6           | 2,59162628   | 2,544354523  | 0,047271757 |  |
| 209018_s_at  | PINK1          | 1,215326747  | 1,16809119   | 0,047235557 |  |
| 222651_s_at  | TRPS1          | 1,215326747  | 1,16809119   | 0,047235557 |  |
| 226220_at    | METTL9         | 1,215326747  | 1,16809119   | 0,047235557 |  |
| 209429_x_at  | EIF2B4         | 3,938261899  | 3,891034012  | 0,047227887 |  |
| 202356_s_at  | GTF2F1         | 2,355089531  | 2,307890888  | 0,047198643 |  |
| 223689_at    | IGF2BP1        | 2,355089531  | 2,307890888  | 0,047198643 |  |
| 202271_at    | FBXO28         | 2,596981013  | 2,549796788  | 0,047184225 |  |
| 200596_s_at  | EIF3A          | 4,108517049  | 4,061373942  | 0,047143107 |  |
| 209665_at    | CYB561D2       | 2,485917452  | 2,438805127  | 0,047112325 |  |
| 213687_s_at  | RPL35A         | 7,38944077   | 7,342404279  | 0,047036491 |  |
| 223105_s_at  | TMEM14B /// TM | 6,931441452  | 6,884415932  | 0,04702552  |  |
| 1553713_a_at | RHEBL1         | 2,609398637  | 2,562416132  | 0,046982505 |  |
| 218940_at    | METTL21D       | 3,231115193  | 3,184136378  | 0,046978815 |  |
| 226556_at    | MAP3K13        | 3,231115193  | 3,184136378  | 0,046978815 |  |
| 1556586_x_at | -              | -0,089689931 | -0,136643983 | 0,046954051 |  |
| 215087_at    | C15orf39       | -0,089689931 | -0,136643983 | 0,046954051 |  |
| 219637_at    | ARMC9          | -0,089689931 | -0,136643983 | 0,046954051 |  |
| 223385_at    | CYP2S1         | -0,089689931 | -0,136643983 | 0,046954051 |  |
| 234068_s_at  | AP2A1          | -0,089689931 | -0,136643983 | 0,046954051 |  |
| 204605_at    | CGRRF1         | 2,371846398  | 2,324919719  | 0,046926679 |  |
| 226757_at    | IFIT2          | 3,086335384  | 3,039473081  | 0,046862303 |  |
| 203174_s_at  | ARFRP1         | 1,238353345  | 1,191491281  | 0,046862064 |  |
| 201004_at    | SSR4           | 5,531743008  | 5,484890723  | 0,046852286 |  |
| 1566906_at   | LOC100129722   | 0,503742507  | 0,456918297  | 0,04682421  |  |
| 218310_at    | KCTD7 /// RABG | 2,830080806  | 2,783327323  | 0,046753482 |  |
| 201507_at    | PFDN1          | 3,731461974  | 3,684723168  | 0,046738806 |  |
| 223585_x_at  | KBTBD2         | 1,732533761  | 1,685812099  | 0,046721662 |  |
| 206245_s_at  | IVNS1ABP       | 3,882346871  | 3,835672678  | 0,046674194 |  |
| 223452_s_at  | ATL3           | 3,251631457  | 3,204982027  | 0,04664943  |  |
| 226793_at    | LINC00294      | 1,515954005  | 1,469325098  | 0,046628907 |  |

|              |                        |              |              |             |  |
|--------------|------------------------|--------------|--------------|-------------|--|
| 202100_at    | RALB                   | 4,065387235  | 4,018839599  | 0,046547635 |  |
| 1552677_a_at | DIP2A                  | 1,261018186  | 1,214517879  | 0,046500307 |  |
| 225287_s_at  | TMEM55B                | 3,333038605  | 3,28656411   | 0,046474495 |  |
| 202441_at    | ERLIN1                 | 3,985300536  | 3,938828971  | 0,046471565 |  |
| 1555613_a_at | ZAP70                  | -1,173767127 | -1,220210588 | 0,046443461 |  |
| 1556374_s_at | LOC100506817           | -1,173767127 | -1,220210588 | 0,046443461 |  |
| 1561269_at   | RAPGEF5                | -1,173767127 | -1,220210588 | 0,046443461 |  |
| 1564386_at   | TXNDC8                 | -1,173767127 | -1,220210588 | 0,046443461 |  |
| 1570282_at   | -                      | -1,173767127 | -1,220210588 | 0,046443461 |  |
| 205595_at    | DSG3                   | -1,173767127 | -1,220210588 | 0,046443461 |  |
| 208122_x_at  | KIR2DS3                | -1,173767127 | -1,220210588 | 0,046443461 |  |
| 209594_x_at  | PSG9                   | -1,173767127 | -1,220210588 | 0,046443461 |  |
| 210381_s_at  | CCKBR                  | -1,173767127 | -1,220210588 | 0,046443461 |  |
| 220114_s_at  | STAB2                  | -1,173767127 | -1,220210588 | 0,046443461 |  |
| 222139_at    | ERV3-2                 | -1,173767127 | -1,220210588 | 0,046443461 |  |
| 231229_at    | HILS1                  | -1,173767127 | -1,220210588 | 0,046443461 |  |
| 231592_at    | TSIX                   | -1,173767127 | -1,220210588 | 0,046443461 |  |
| 231838_at    | PABPC1L                | -1,173767127 | -1,220210588 | 0,046443461 |  |
| 232456_at    | C10orf71               | -1,173767127 | -1,220210588 | 0,046443461 |  |
| 235624_at    | HDLBP                  | -1,173767127 | -1,220210588 | 0,046443461 |  |
| 235789_at    | KDM4B /// LOC100507495 | -1,173767127 | -1,220210588 | 0,046443461 |  |
| 239248_at    | LOC100507495           | -1,173767127 | -1,220210588 | 0,046443461 |  |
| 242188_at    | -                      | -1,173767127 | -1,220210588 | 0,046443461 |  |
| 210833_at    | PTGER3                 | -0,055687482 | -0,102100538 | 0,046413056 |  |
| 225663_at    | ACBD5                  | 2,752227654  | 2,705818724  | 0,04640893  |  |
| 202299_s_at  | HBXIP                  | 5,321676926  | 5,275295809  | 0,046381117 |  |
| 222532_at    | SRPRB                  | 3,903389697  | 3,857048799  | 0,046340898 |  |
| 234950_s_at  | RFWD2                  | 2,857110344  | 2,810785576  | 0,046324767 |  |
| 202185_at    | PLOD3                  | 3,857278636  | 3,810956512  | 0,046322124 |  |
| 37577_at     | ARHGAP19               | 3,03794094   | 2,991620231  | 0,046320709 |  |
| 226287_at    | CCDC34                 | 3,595400101  | 3,549096127  | 0,046303974 |  |
| 219212_at    | HSPA14                 | 4,446258267  | 4,399999158  | 0,046259109 |  |
| 212885_at    | MPHOSPH10              | 3,998848507  | 3,952590169  | 0,046258338 |  |
| 233274_at    | -                      | 0,541261317  | 0,495031851  | 0,046229466 |  |
| 204214_s_at  | RAB32                  | 2,864529541  | 2,81832103   | 0,046208512 |  |
| 1569459_a_at | -                      | 2,544366685  | 2,498185745  | 0,046180941 |  |
| 236923_x_at  | -                      | 2,768138014  | 2,721978587  | 0,046159427 |  |
| 224484_s_at  | BRMS1L                 | 1,283332461  | 1,23718272   | 0,046149741 |  |
| 224217_s_at  | FAF1                   | 3,868391882  | 3,822243651  | 0,04614823  |  |
| 219002_at    | FASTKD1                | 3,869867201  | 3,823741953  | 0,046125248 |  |
| 202703_at    | DUSP11                 | 3,285189903  | 3,239069096  | 0,046120807 |  |
| 210935_s_at  | WDR1                   | 3,288503211  | 3,242433922  | 0,04606929  |  |
| 1562841_at   | LOC339666              | -0,033456564 | -0,079522948 | 0,046066384 |  |
| 1563816_at   | GAB4                   | -0,033456564 | -0,079522948 | 0,046066384 |  |
| 1569868_s_at | EME2                   | -0,033456564 | -0,079522948 | 0,046066384 |  |
| 213380_x_at  | MST1P9                 | -0,033456564 | -0,079522948 | 0,046066384 |  |
| 215540_at    | -                      | -0,033456564 | -0,079522948 | 0,046066384 |  |
| 238501_at    | -                      | -0,033456564 | -0,079522948 | 0,046066384 |  |
| 240294_at    | HIPK2                  | -0,033456564 | -0,079522948 | 0,046066384 |  |
| 225507_at    | PNISR                  | 3,667581479  | 3,621520989  | 0,046060491 |  |
| 1569594_a_at | NEMF                   | 3,923419763  | 3,877391565  | 0,046028197 |  |
| 1558836_at   | -                      | 1,292162421  | 1,246149888  | 0,046012533 |  |
| 219854_at    | ZNF14                  | 1,292162421  | 1,246149888  | 0,046012533 |  |
| 228722_at    | PRMT2                  | 2,671625168  | 2,625627364  | 0,045997804 |  |
| 202041_s_at  | FIBP                   | 3,831009889  | 3,785040604  | 0,045969285 |  |
| 223088_x_at  | ECHDC1                 | 4,400036207  | 4,354078399  | 0,045957808 |  |

|              |                 |              |              |             |  |
|--------------|-----------------|--------------|--------------|-------------|--|
| 227421_at    | YBEY            | 3,729025365  | 3,683073218  | 0,045952147 |  |
| 210996_s_at  | YWHAE           | 5,144381006  | 5,098433773  | 0,045947233 |  |
| 218773_s_at  | MSRB2           | 3,062018438  | 3,016072743  | 0,045945695 |  |
| 225375_at    | MIR4723 /// TME | 2,680059304  | 2,634191677  | 0,045867627 |  |
| 219253_at    | TMEM185B        | 2,886560922  | 2,840694075  | 0,045866846 |  |
| 201298_s_at  | MOB1A           | 4,192270951  | 4,146452482  | 0,045818469 |  |
| 209164_s_at  | CYB561          | 1,305306849  | 1,259496994  | 0,045809855 |  |
| 208683_at    | CAPN2           | 6,196198265  | 6,150440013  | 0,045758252 |  |
| 1554384_at   | PADI2           | -2,908843709 | -2,954576755 | 0,045733046 |  |
| 1554751_at   | -               | -2,908843709 | -2,954576755 | 0,045733046 |  |
| 1555097_a_at | PTGFR           | -2,908843709 | -2,954576755 | 0,045733046 |  |
| 1556095_at   | UNC13C          | -2,908843709 | -2,954576755 | 0,045733046 |  |
| 1561364_at   | -               | -2,908843709 | -2,954576755 | 0,045733046 |  |
| 1563357_at   | -               | -2,908843709 | -2,954576755 | 0,045733046 |  |
| 1565875_at   | -               | -2,908843709 | -2,954576755 | 0,045733046 |  |
| 1567859_at   | -               | -2,908843709 | -2,954576755 | 0,045733046 |  |
| 1570306_at   | ST18            | -2,908843709 | -2,954576755 | 0,045733046 |  |
| 207599_at    | MMP20           | -2,908843709 | -2,954576755 | 0,045733046 |  |
| 216007_at    | -               | -2,908843709 | -2,954576755 | 0,045733046 |  |
| 216719_s_at  | -               | -2,908843709 | -2,954576755 | 0,045733046 |  |
| 219857_at    | PLEKHS1         | -2,908843709 | -2,954576755 | 0,045733046 |  |
| 230319_at    | -               | -2,908843709 | -2,954576755 | 0,045733046 |  |
| 234844_at    | ZNF407          | -2,908843709 | -2,954576755 | 0,045733046 |  |
| 236262_at    | MMRN2           | -2,908843709 | -2,954576755 | 0,045733046 |  |
| 236870_at    | IQCF4           | -2,908843709 | -2,954576755 | 0,045733046 |  |
| 237664_at    | -               | -2,908843709 | -2,954576755 | 0,045733046 |  |
| 239129_at    | -               | -2,908843709 | -2,954576755 | 0,045733046 |  |
| 240949_x_at  | -               | -2,908843709 | -2,954576755 | 0,045733046 |  |
| 241547_at    | A1CF            | -2,908843709 | -2,954576755 | 0,045733046 |  |
| 243632_at    | -               | -2,908843709 | -2,954576755 | 0,045733046 |  |
| 244067_x_at  | -               | -2,908843709 | -2,954576755 | 0,045733046 |  |
| 203139_at    | DAPK1           | 4,796992917  | 4,751278918  | 0,045713999 |  |
| 210097_s_at  | NOL7            | 5,975086044  | 5,929409519  | 0,045676525 |  |
| 243267_x_at  | EFNA2           | 0,57782909   | 0,532164371  | 0,04566472  |  |
| 211615_s_at  | LRPPRC          | 5,020671303  | 4,975089315  | 0,045581988 |  |
| 243829_at    | BRAF            | -0,00073712  | -0,046302147 | 0,045565027 |  |
| 222821_s_at  | GEMIN7          | 3,647078281  | 3,601570866  | 0,045507414 |  |
| 213271_s_at  | DOPEY1          | 2,173470163  | 2,127967638  | 0,045502525 |  |
| 221619_s_at  | MTCH1           | 6,144263096  | 6,098778216  | 0,04548488  |  |
| 227520_at    | TXLNG           | 4,362800281  | 4,317323511  | 0,04547677  |  |
| 242429_at    | ZNF567          | 2,59519831   | 2,549796788  | 0,045401522 |  |
| 204439_at    | IFI44L          | 3,097712429  | 3,052311115  | 0,045401314 |  |
| 225363_at    | PTEN            | 4,437828024  | 4,392446485  | 0,045381538 |  |
| 203791_at    | DMXL1           | 4,099113343  | 4,053733117  | 0,045380226 |  |
| 224467_s_at  | PDCD2L          | 4,567134896  | 4,52176814   | 0,045366756 |  |
| 225762_x_at  | RN45S           | 3,405017566  | 3,359653127  | 0,045364439 |  |
| 200006_at    | PARK7           | 6,967976658  | 6,922628453  | 0,045348205 |  |
| 221860_at    | HNRNPL          | 2,922548342  | 2,877228323  | 0,045320019 |  |
| 212149_at    | EFR3A           | 4,206061174  | 4,160749839  | 0,045311336 |  |
| 41856_at     | UNC5B           | 2,104964143  | 2,059671766  | 0,045292377 |  |
| 200943_at    | HMGNI           | 7,475901967  | 7,430655592  | 0,045246375 |  |
| 1552274_at   | PXK             | 0,020670649  | -0,024572586 | 0,045243236 |  |
| 1554193_s_at | MANEA           | 0,020670649  | -0,024572586 | 0,045243236 |  |
| 1566908_at   | C9orf173        | 0,020670649  | -0,024572586 | 0,045243236 |  |
| 207356_at    | DEFB4A /// DEFB | 0,020670649  | -0,024572586 | 0,045243236 |  |
| 213283_s_at  | SALL2           | 0,020670649  | -0,024572586 | 0,045243236 |  |

|              |                 |              |              |             |  |
|--------------|-----------------|--------------|--------------|-------------|--|
| 232162_at    | ZNF696          | 0,020670649  | -0,024572586 | 0,045243236 |  |
| 232736_s_at  | POM121L9P       | 0,020670649  | -0,024572586 | 0,045243236 |  |
| 207727_s_at  | MUTYH           | 1,021868205  | 0,976641161  | 0,045227044 |  |
| 210547_x_at  | ICA1            | 1,021868205  | 0,976641161  | 0,045227044 |  |
| 212236_x_at  | JUP /// KRT17   | 0,613492853  | 0,568365095  | 0,045127758 |  |
| 211933_s_at  | HNRNPA3 /// HN  | 5,438132931  | 5,39300832   | 0,045124611 |  |
| 202136_at    | ZMYND11         | 3,421207626  | 3,376085218  | 0,045122408 |  |
| 209362_at    | MED21           | 2,72965419   | 2,684536601  | 0,045117589 |  |
| 226149_at    | SNHG11 /// SNO  | 2,72965419   | 2,684536601  | 0,045117589 |  |
| 226723_at    | CCDC23          | 2,030406107  | 1,98530622   | 0,045099887 |  |
| 229582_at    | INO80C          | 4,893714114  | 4,848693177  | 0,045020937 |  |
| 1598_g_at    | GAS6            | 1,498892774  | 1,453926914  | 0,04496586  |  |
| 228217_s_at  | PSMG4           | 5,084646091  | 5,039691895  | 0,044954196 |  |
| 218926_at    | MYNN            | 2,043538949  | 1,998633167  | 0,044905782 |  |
| 211072_x_at  | LOC100288366 /  | 7,743452596  | 7,698590113  | 0,044862483 |  |
| 203047_at    | STK10           | 1,369290453  | 1,324440845  | 0,044849607 |  |
| 213805_at    | ABHD5           | 1,369290453  | 1,324440845  | 0,044849607 |  |
| 206154_at    | RLBP1           | 0,052199481  | 0,007421914  | 0,044777567 |  |
| 207042_at    | E2F2            | 0,052199481  | 0,007421914  | 0,044777567 |  |
| 208198_x_at  | KIR2DS1         | 0,052199481  | 0,007421914  | 0,044777567 |  |
| 212707_s_at  | RASA4 /// RASA4 | 0,052199481  | 0,007421914  | 0,044777567 |  |
| 214643_x_at  | BIN1            | 0,052199481  | 0,007421914  | 0,044777567 |  |
| 226212_s_at  | INSR            | 0,052199481  | 0,007421914  | 0,044777567 |  |
| 229663_at    | LONP2           | 0,052199481  | 0,007421914  | 0,044777567 |  |
| 235729_at    | ZNF514          | 0,052199481  | 0,007421914  | 0,044777567 |  |
| 242245_at    | -               | 0,052199481  | 0,007421914  | 0,044777567 |  |
| 200898_s_at  | MGEA5           | 3,375201825  | 3,330438773  | 0,044763053 |  |
| 225651_at    | UBE2E2          | 3,75400739   | 3,709248632  | 0,044758758 |  |
| 227280_s_at  | CCNYL1          | 2,37600538   | 2,331254065  | 0,044751315 |  |
| 218421_at    | CERK            | 1,64218396   | 1,59747851   | 0,04470545  |  |
| 231846_at    | FOXRED2         | 1,64218396   | 1,59747851   | 0,04470545  |  |
| 218042_at    | COPS4           | 4,657462947  | 4,612762285  | 0,044700662 |  |
| 207941_s_at  | RBM39           | 5,55003372   | 5,505342242  | 0,044691479 |  |
| 203501_at    | CPQ             | 2,380152406  | 2,335461563  | 0,044690843 |  |
| 209895_at    | PTPN11          | 1,865674241  | 1,820984782  | 0,044689459 |  |
| 215966_x_at  | GK3P            | 1,381753566  | 1,337086025  | 0,044667542 |  |
| 1553579_a_at | SPAG11A /// SPA | -3,054236653 | -3,098858316 | 0,044621664 |  |
| 1553886_at   | CCDC108         | -3,054236653 | -3,098858316 | 0,044621664 |  |
| 1557437_a_at | -               | -3,054236653 | -3,098858316 | 0,044621664 |  |
| 1569712_at   | -               | -3,054236653 | -3,098858316 | 0,044621664 |  |
| 1570578_at   | -               | -3,054236653 | -3,098858316 | 0,044621664 |  |
| 204111_at    | HNMT            | -3,054236653 | -3,098858316 | 0,044621664 |  |
| 204469_at    | PTPRZ1          | -3,054236653 | -3,098858316 | 0,044621664 |  |
| 206693_at    | IL7             | -3,054236653 | -3,098858316 | 0,044621664 |  |
| 215441_at    | -               | -3,054236653 | -3,098858316 | 0,044621664 |  |
| 215962_at    | -               | -3,054236653 | -3,098858316 | 0,044621664 |  |
| 220504_at    | KERA            | -3,054236653 | -3,098858316 | 0,044621664 |  |
| 231790_at    | DMGDH           | -3,054236653 | -3,098858316 | 0,044621664 |  |
| 234432_at    | -               | -3,054236653 | -3,098858316 | 0,044621664 |  |
| 234583_at    | CHL1            | -3,054236653 | -3,098858316 | 0,044621664 |  |
| 237489_at    | -               | -3,054236653 | -3,098858316 | 0,044621664 |  |
| 238378_at    | -               | -3,054236653 | -3,098858316 | 0,044621664 |  |
| 243847_at    | -               | -3,054236653 | -3,098858316 | 0,044621664 |  |
| 208812_x_at  | HLA-C           | 6,771732655  | 6,727231231  | 0,044501424 |  |
| 222297_x_at  | -               | 1,394109935  | 1,349621332  | 0,044488603 |  |
| 203236_s_at  | LGALS9          | 0,072842263  | 0,028364014  | 0,044478248 |  |

|             |                |              |              |             |  |
|-------------|----------------|--------------|--------------|-------------|--|
| 210239_at   | IRX5           | 0,072842263  | 0,028364014  | 0,044478248 |  |
| 238827_at   | -              | 0,072842263  | 0,028364014  | 0,044478248 |  |
| 214116_at   | BTD            | 1,073999308  | 1,029536893  | 0,044462415 |  |
| 202644_s_at | TNFAIP3        | 1,659347917  | 1,614891062  | 0,044456856 |  |
| 212620_at   | ZNF609         | 1,659347917  | 1,614891062  | 0,044456856 |  |
| 205928_at   | ZNF443         | 3,325531666  | 3,281121096  | 0,04441057  |  |
| 213322_at   | C6orf130       | 3,249366227  | 3,204982027  | 0,0443842   |  |
| 229173_at   | KIAA1715       | 1,40228911   | 1,3579181    | 0,044371009 |  |
| 52975_at    | FAM125B        | -0,325601563 | -0,369933821 | 0,044332258 |  |
| 218844_at   | ACSF2          | 1,894952274  | 1,85068474   | 0,044267533 |  |
| 218378_s_at | LOC100630923 / | 2,410880861  | 2,366632651  | 0,04424821  |  |
| 225928_at   | VTI1B          | 1,67631007   | 1,632095957  | 0,044214114 |  |
| 208720_s_at | RBM39          | 5,113889166  | 5,069677524  | 0,044211642 |  |
| 224712_x_at | C19orf42       | 1,414471577  | 1,370274469  | 0,044197108 |  |
| 219938_s_at | PSTPIP2        | 2,678376417  | 2,634191677  | 0,04418474  |  |
| 1567035_at  | -              | 0,682279745  | 0,638150376  | 0,044129369 |  |
| 229337_at   | USP2           | 0,682279745  | 0,638150376  | 0,044129369 |  |
| 218797_s_at | SIRT7          | 2,097427503  | 2,053299695  | 0,044127807 |  |
| 219007_at   | NUP43          | 5,345732318  | 5,301609855  | 0,044122463 |  |
| 201241_at   | DDX1           | 5,786920447  | 5,742834983  | 0,044085464 |  |
| 202424_at   | MAP2K2         | 3,492853048  | 3,448769219  | 0,044083829 |  |
| 214679_x_at | GNA11          | 2,102456302  | 2,058399602  | 0,0440567   |  |
| 1553153_at  | ATP6V0D2       | 0,103263601  | 0,059218869  | 0,044044733 |  |
| 205975_s_at | HOXD1          | 0,103263601  | 0,059218869  | 0,044044733 |  |
| 209558_s_at | HIP1R          | 0,103263601  | 0,059218869  | 0,044044733 |  |
| 216275_at   | BUB1           | 0,103263601  | 0,059218869  | 0,044044733 |  |
| 232548_at   | GALNTL1        | 0,103263601  | 0,059218869  | 0,044044733 |  |
| 217916_s_at | FAM49B         | 4,838649416  | 4,794709145  | 0,043940271 |  |
| 226004_at   | CABLES2        | 2,281618189  | 2,237691445  | 0,043926744 |  |
| 203584_at   | EMC2           | 4,539590968  | 4,495687112  | 0,043903856 |  |
| 218387_s_at | PGLS           | 3,436222554  | 3,392332256  | 0,043890298 |  |
| 213589_s_at | B3GNTL1        | 0,702292136  | 0,658444279  | 0,043847857 |  |
| 209193_at   | PIM1           | 1,442503549  | 1,398700978  | 0,04380257  |  |
| 224509_s_at | RTN4IP1        | 2,44295215   | 2,39915583   | 0,04379632  |  |
| 1565660_at  | FUT6           | 0,123193849  | 0,079428135  | 0,043765714 |  |
| 208364_at   | INPP4A         | 0,123193849  | 0,079428135  | 0,043765714 |  |
| 220186_s_at | CDHR2          | 0,123193849  | 0,079428135  | 0,043765714 |  |
| 228651_at   | VWA1           | 0,123193849  | 0,079428135  | 0,043765714 |  |
| 236080_at   | LOC100507670   | 0,123193849  | 0,079428135  | 0,043765714 |  |
| 240391_at   | NDUFB2         | 0,123193849  | 0,079428135  | 0,043765714 |  |
| 205078_at   | PIGF           | 2,827046023  | 2,783327323  | 0,0437187   |  |
| 218276_s_at | SAV1           | 2,127340679  | 2,083632167  | 0,043708512 |  |
| 216591_s_at | SDHC           | 3,299492934  | 3,255815291  | 0,043677643 |  |
| 224394_at   | RNF7           | 0,715481152  | 0,67181667   | 0,043664482 |  |
| 225140_at   | KLF3           | 1,454352496  | 1,410714371  | 0,043638125 |  |
| 201134_x_at | COX7C          | 6,963362865  | 6,919741536  | 0,04362133  |  |
| 224850_at   | ATAD1          | 3,992767659  | 3,949162156  | 0,043605504 |  |
| 227921_at   | -              | 3,043834719  | 3,000258961  | 0,043575758 |  |
| 228846_at   | MXD1           | 2,724770722  | 2,681234383  | 0,043536339 |  |
| 206492_at   | FHIT           | 1,462198073  | 1,418668082  | 0,043529991 |  |
| 210191_s_at | PHTF1          | 1,462198073  | 1,418668082  | 0,043529991 |  |
| 227776_at   | ACER3          | 2,462640593  | 2,419116683  | 0,04352391  |  |
| 1553180_at  | ADAMTS19       | -3,192553003 | -3,236070201 | 0,043517198 |  |
| 1553519_at  | LINC00314      | -3,192553003 | -3,236070201 | 0,043517198 |  |
| 1560075_at  | -              | -3,192553003 | -3,236070201 | 0,043517198 |  |
| 1561021_at  | -              | -3,192553003 | -3,236070201 | 0,043517198 |  |

|             |                 |              |              |             |  |
|-------------|-----------------|--------------|--------------|-------------|--|
| 1563173_at  | -               | -3,192553003 | -3,236070201 | 0,043517198 |  |
| 206415_at   | TLL1            | -3,192553003 | -3,236070201 | 0,043517198 |  |
| 207815_at   | PF4V1           | -3,192553003 | -3,236070201 | 0,043517198 |  |
| 211093_at   | PDE6C           | -3,192553003 | -3,236070201 | 0,043517198 |  |
| 220700_at   | -               | -3,192553003 | -3,236070201 | 0,043517198 |  |
| 240167_at   | LOC152742       | -3,192553003 | -3,236070201 | 0,043517198 |  |
| 241188_at   | -               | -3,192553003 | -3,236070201 | 0,043517198 |  |
| 221532_s_at | WDR61           | 5,534071148  | 5,49056154   | 0,043509608 |  |
| 225468_at   | PATL1           | 2,466546243  | 2,423075926  | 0,043470318 |  |
| 225730_s_at | THUMPD3         | 2,466546243  | 2,423075926  | 0,043470318 |  |
| 1556301_at  | LOC100287015    | 0,735041319  | 0,691645685  | 0,043395634 |  |
| 212423_at   | ZCCHC24         | 0,735041319  | 0,691645685  | 0,043395634 |  |
| 241538_at   | CXorf30         | 0,735041319  | 0,691645685  | 0,043395634 |  |
| 238004_at   | PGBD2           | 1,735773781  | 1,692388143  | 0,043385638 |  |
| 213286_at   | ZFR             | 1,473887017  | 1,43051703   | 0,043369987 |  |
| 232658_at   | -               | 0,152582607  | 0,109221392  | 0,043361215 |  |
| 236513_at   | -               | 0,152582607  | 0,109221392  | 0,043361215 |  |
| 243888_at   | -               | 0,152582607  | 0,109221392  | 0,043361215 |  |
| 223312_at   | PRADC1          | 2,47626436   | 2,432926755  | 0,043337605 |  |
| 57739_at    | DND1            | 1,859746653  | 1,816476579  | 0,043270074 |  |
| 239442_at   | CEP68           | 0,747935635  | 0,704715219  | 0,043220416 |  |
| 200772_x_at | LOC100506248 /  | 7,514083259  | 7,470895038  | 0,043188222 |  |
| 201380_at   | CRTAP /// LOC10 | 2,166283906  | 2,123108223  | 0,043175683 |  |
| 209390_at   | TSC1            | 2,491678455  | 2,448549499  | 0,043128957 |  |
| 218965_s_at | TUT1            | 0,171847695  | 0,128747141  | 0,043100555 |  |
| 221201_s_at | ZNF155          | 0,171847695  | 0,128747141  | 0,043100555 |  |
| 233300_at   | -               | 0,171847695  | 0,128747141  | 0,043100555 |  |
| 221449_s_at | ITFG1           | 3,343695493  | 3,300620584  | 0,04307491  |  |
| 223245_at   | STRBP           | 2,876321464  | 2,833274877  | 0,043046587 |  |
| 212367_at   | FEM1B           | 3,085065712  | 3,042049843  | 0,043015869 |  |
| 212040_at   | TGOLN2          | 1,987559146  | 1,944570415  | 0,042988731 |  |
| 1557649_at  | GALE            | 0,767063567  | 0,724100169  | 0,042963398 |  |
| 206015_s_at | FOXJ3           | 3,885996912  | 3,843079586  | 0,042917326 |  |
| 1294_at     | UBA7            | 0,186131111  | 0,143220285  | 0,042910826 |  |
| 210655_s_at | FOXO3 /// FOXO  | 1,187200746  | 1,144305291  | 0,042895455 |  |
| 200645_at   | GABARAP         | 4,887900851  | 4,845008859  | 0,042891993 |  |
| 37020_at    | CRP             | -2,572231155 | -2,61510413  | 0,042872975 |  |
| 208758_at   | ATIC            | 5,001282527  | 4,958476321  | 0,042806206 |  |
| 222525_s_at | CCDC25          | 4,194038762  | 4,151234028  | 0,042804734 |  |
| 204523_at   | ZNF140          | 2,516380342  | 2,473581079  | 0,042799262 |  |
| 212567_s_at | MAP4            | 0,779676066  | 0,73688026   | 0,042795805 |  |
| 232680_at   | HDGFL1          | 0,779676066  | 0,73688026   | 0,042795805 |  |
| 243918_at   | -               | 0,779676066  | 0,73688026   | 0,042795805 |  |
| 225797_at   | MRPL54          | 3,367911651  | 3,325159096  | 0,042752555 |  |
| 209240_at   | OGT             | 4,642867483  | 4,600140481  | 0,042727002 |  |
| 206351_s_at | PEX10           | 0,20027154   | 0,157549243  | 0,042722297 |  |
| 239763_at   | LOC100507338 /  | 0,20027154   | 0,157549243  | 0,042722297 |  |
| 226319_s_at | ALYREF          | 5,661137055  | 5,618433519  | 0,042703536 |  |
| 201774_s_at | NCAPD2          | 2,201862497  | 2,159161028  | 0,042701469 |  |
| 222719_s_at | PDGFC           | 2,525769574  | 2,483094137  | 0,042675438 |  |
| 213656_s_at | KLC1            | 4,253455927  | 4,210848982  | 0,042606945 |  |
| 208025_s_at | HMGA2           | 3,45992606   | 3,417357537  | 0,042568524 |  |
| 210686_x_at | SLC25A16        | 3,534378463  | 3,491815843  | 0,04256262  |  |
| 229470_at   | -               | 0,798390451  | 0,755840599  | 0,042549852 |  |
| 218504_at   | FAHD2A          | 2,915422315  | 2,87289275   | 0,042529565 |  |
| 207108_s_at | NIPBL           | 2,027765132  | 1,98530622   | 0,042458912 |  |

|              |                 |             |             |             |  |
|--------------|-----------------|-------------|-------------|-------------|--|
| 222745_s_at  | C15orf29        | 2,027765132 | 1,98530622  | 0,042458912 |  |
| 1554572_a_at | SUV39H2         | 3,127619759 | 3,08516499  | 0,042454768 |  |
| 208845_at    | VDAC3           | 6,530195776 | 6,487755648 | 0,042440127 |  |
| 219166_at    | DNAAF2          | 4,648465551 | 4,606029888 | 0,042435662 |  |
| 234915_s_at  | DENR            | 3,130084275 | 3,087661492 | 0,042422783 |  |
| 203733_at    | DEXI            | 2,225103271 | 2,182705233 | 0,042398038 |  |
| 200766_at    | CTSD            | 0,810733188 | 0,768343791 | 0,042389397 |  |
| 227437_at    | LOC100506668    | 0,810733188 | 0,768343791 | 0,042389397 |  |
| 211316_x_at  | CFLAR           | 2,232003119 | 2,189694216 | 0,042308903 |  |
| 210422_x_at  | SLC11A1         | 1,233777334 | 1,191491281 | 0,042286053 |  |
| 227745_at    | LOC100507018    | 1,233777334 | 1,191491281 | 0,042286053 |  |
| 224737_x_at  | CCAR1           | 2,559073676 | 2,516830926 | 0,042242751 |  |
| 226020_s_at  | DAB1 /// OMA1   | 2,238870125 | 2,196649505 | 0,04222062  |  |
| 200947_s_at  | GLUD1           | 4,527022536 | 4,484837154 | 0,042185382 |  |
| 222037_at    | MCM4            | 3,634114217 | 3,591931093 | 0,042183123 |  |
| 221539_at    | EIF4EBP1        | 4,914235548 | 4,872052597 | 0,042182952 |  |
| 213044_at    | ROCK1           | 3,943876123 | 3,901713973 | 0,04216215  |  |
| 202304_at    | FNDC3A          | 3,243687542 | 3,201528602 | 0,04215894  |  |
| 200848_at    | AHCYL1          | 3,152077493 | 3,109937707 | 0,042139785 |  |
| 207025_at    | GJC2            | 0,246434561 | 0,204310755 | 0,042123805 |  |
| 213700_s_at  | -               | 0,246434561 | 0,204310755 | 0,042123805 |  |
| 215556_at    | -               | 0,246434561 | 0,204310755 | 0,042123805 |  |
| 230673_at    | PKHD1L1         | 0,246434561 | 0,204310755 | 0,042123805 |  |
| 243736_at    | -               | 0,246434561 | 0,204310755 | 0,042123805 |  |
| 223384_s_at  | TRIM4           | 2,947914474 | 2,905803877 | 0,042110597 |  |
| 219031_s_at  | NIP7            | 4,006916639 | 3,964864009 | 0,04205263  |  |
| 220927_s_at  | HPSE2           | 1,578645857 | 1,536652708 | 0,041993149 |  |
| 219281_at    | MSRA            | 2,580856819 | 2,538891651 | 0,041965168 |  |
| 223433_at    | YAE1D1          | 2,074578432 | 2,032717854 | 0,041860578 |  |
| 224916_at    | TMEM173         | 2,074578432 | 2,032717854 | 0,041860578 |  |
| 218367_x_at  | USP21           | 1,85379461  | 1,811954245 | 0,041840365 |  |
| 216693_x_at  | HDGFRP3         | 2,272723257 | 2,230931691 | 0,041791566 |  |
| 224926_at    | EXOC4           | 3,182077878 | 3,140317145 | 0,041760733 |  |
| 1552264_a_at | MAPK1           | 2,450859799 | 2,409170778 | 0,04168902  |  |
| 201021_s_at  | DSTN            | 5,325445321 | 5,28375775  | 0,041687571 |  |
| 208899_x_at  | ATP6V1D         | 4,566680113 | 4,524995365 | 0,041684749 |  |
| 200935_at    | CALR            | 1,603688695 | 1,562009954 | 0,04167874  |  |
| 202827_s_at  | MMP14           | 0,291166226 | 0,249604176 | 0,04156205  |  |
| 225776_at    | RBMS2           | 0,291166226 | 0,249604176 | 0,04156205  |  |
| 214075_at    | NENF            | 1,614289682 | 1,572742379 | 0,041547303 |  |
| 220238_s_at  | KLHL7           | 1,614289682 | 1,572742379 | 0,041547303 |  |
| 233868_x_at  | ADAM33          | 1,614289682 | 1,572742379 | 0,041547303 |  |
| 201881_s_at  | ARIH1           | 2,882181479 | 2,840694075 | 0,041487404 |  |
| 228723_at    | -               | 1,883312263 | 1,841838775 | 0,041473488 |  |
| 211801_x_at  | MFN1            | 1,621313976 | 1,579853228 | 0,041460748 |  |
| 40829_at     | WDTC1           | 2,301433511 | 2,259997914 | 0,041435597 |  |
| 212929_s_at  | FAM21A /// FAM2 | 2,623460554 | 2,582026171 | 0,041434382 |  |
| 211968_s_at  | HSP90AA1        | 7,405519523 | 7,364125898 | 0,041393625 |  |
| 208068_x_at  | CSH1 /// CSHL1  | 0,30867765  | 0,26733076  | 0,04134689  |  |
| 221985_at    | KLHL24          | 0,30867765  | 0,26733076  | 0,04134689  |  |
| 231873_at    | BMPR2           | 0,30867765  | 0,26733076  | 0,04134689  |  |
| 204332_s_at  | AGA             | 1,631786706 | 1,590454215 | 0,041332491 |  |
| 201098_at    | COPB2           | 4,872528643 | 4,831294479 | 0,041234164 |  |
| 216977_x_at  | SNRPA1          | 4,206061174 | 4,164893351 | 0,041167824 |  |
| 223055_s_at  | XPO5            | 2,132266459 | 2,091116676 | 0,041149783 |  |
| 223157_at    | NOA1            | 3,327680494 | 3,28656411  | 0,041116384 |  |

|              |                  |             |              |             |  |
|--------------|------------------|-------------|--------------|-------------|--|
| 222899_at    | ITGA11           | 0,917308734 | 0,876248481  | 0,041060253 |  |
| 1566671_a_at | PDXK             | 0,334552598 | 0,293518836  | 0,041033763 |  |
| 213758_at    | COX4I1           | 0,334552598 | 0,293518836  | 0,041033763 |  |
| 219464_at    | CA14             | 0,334552598 | 0,293518836  | 0,041033763 |  |
| 224252_s_at  | FXVD5            | 5,343875661 | 5,302953328  | 0,040922333 |  |
| 204137_at    | GPR137B          | 2,344516784 | 2,303602088  | 0,040914696 |  |
| 1555301_a_at | DIP2A            | 2,666540916 | 2,625627364  | 0,040913553 |  |
| 205996_s_at  | AK2              | 2,929639344 | 2,888726553  | 0,04091279  |  |
| 212948_at    | CAMTA2           | 0,934330293 | 0,893473268  | 0,040857025 |  |
| 219344_at    | SLC29A3          | 0,934330293 | 0,893473268  | 0,040857025 |  |
| 1553584_at   | CXorf36          | 0,351548291 | 0,310717132  | 0,040831159 |  |
| 239816_at    | POLD3            | 0,351548291 | 0,310717132  | 0,040831159 |  |
| 210376_x_at  | ELK1             | 2,81177561  | 2,770953871  | 0,040821739 |  |
| 210250_x_at  | ADSL             | 5,06851491  | 5,027715959  | 0,040798951 |  |
| 204566_at    | PPM1D            | 2,355089531 | 2,314300277  | 0,040789254 |  |
| 230972_at    | ANKRD9           | 3,358484112 | 3,317734938  | 0,040749175 |  |
| 238177_at    | SLC6A19          | 0,945567441 | 0,904843258  | 0,040724183 |  |
| 226392_at    | RASA2            | 3,067171967 | 3,026519779  | 0,040652188 |  |
| 205542_at    | STEAP1           | 3,274090262 | 3,233443554  | 0,040646708 |  |
| 222806_s_at  | C11orf30         | 1,689737652 | 1,64909809   | 0,040639561 |  |
| 201696_at    | SRSF4            | 4,226646405 | 4,186016868  | 0,040629537 |  |
| 203150_at    | RABEPK           | 2,954882186 | 2,914267328  | 0,040614858 |  |
| 228026_at    | SIKE1            | 2,371846398 | 2,331254065  | 0,040592334 |  |
| 201666_at    | TIMP1            | 8,08296092  | 8,042372185  | 0,040588735 |  |
| 218270_at    | MRPL24           | 3,279650757 | 3,239069096  | 0,040581662 |  |
| 202537_s_at  | CHMP2B           | 3,373122675 | 3,332545245  | 0,04057743  |  |
| 207717_s_at  | PKP2             | 0,376672223 | 0,336136178  | 0,040536046 |  |
| 219005_at    | TMEM59L          | 0,376672223 | 0,336136178  | 0,040536046 |  |
| 239269_at    | LOC100653017 /   | 0,376672223 | 0,336136178  | 0,040536046 |  |
| 202060_at    | CTR9             | 4,290281671 | 4,249823666  | 0,040458005 |  |
| 205480_s_at  | UGP2             | 4,706176435 | 4,665728361  | 0,040448074 |  |
| 204331_s_at  | MRPS12           | 6,114235615 | 6,073811461  | 0,040424154 |  |
| 218088_s_at  | RRAGC            | 3,193905507 | 3,153484076  | 0,040421432 |  |
| 221706_s_at  | USE1             | 2,194816625 | 2,154405725  | 0,0404109   |  |
| 1552812_a_at | SENP1            | 0,97328325  | 0,932882274  | 0,040400976 |  |
| 228799_at    | LOC100507239     | 0,97328325  | 0,932882274  | 0,040400976 |  |
| 202915_s_at  | FAM20B           | 3,389672581 | 3,349287209  | 0,040385372 |  |
| 204115_at    | GNG11            | 1,390002893 | 1,349621332  | 0,040381561 |  |
| 212118_at    | TRIM27           | 3,391728033 | 3,351366359  | 0,040361674 |  |
| 217968_at    | TSSC1            | 2,721505869 | 2,681234383  | 0,040271486 |  |
| 213461_at    | NUDT21           | 2,402750389 | 2,362515214  | 0,040235175 |  |
| 211296_x_at  | UBC              | 7,60939942  | 7,569187982  | 0,040211438 |  |
| 201248_s_at  | SREBF2           | 1,000476627 | 0,960386719  | 0,040089908 |  |
| 221946_at    | C9orf116         | 1,000476627 | 0,960386719  | 0,040089908 |  |
| 227954_at    | ITPRIPL2         | 1,000476627 | 0,960386719  | 0,040089908 |  |
| 239091_at    | -                | 1,000476627 | 0,960386719  | 0,040089908 |  |
| 221592_at    | TBC1D8           | 0,417596971 | 0,377530647  | 0,040066324 |  |
| 219816_s_at  | RBM23            | 3,665883965 | 3,625821706  | 0,040062259 |  |
| 218669_at    | RAP2C            | 3,941773349 | 3,901713973  | 0,040059376 |  |
| 201570_at    | SAMM50           | 4,511983428 | 4,471995246  | 0,039988182 |  |
| 200757_s_at  | CALU             | 4,918518904 | 4,878554857  | 0,039964047 |  |
| 204265_s_at  | GPSM3            | 1,748661581 | 1,708698295  | 0,039963286 |  |
| 222678_s_at  | DCUN1D1          | 2,429008604 | 2,389070873  | 0,039937731 |  |
| 1563753_at   | BPI /// LOC14968 | -0,57445847 | -0,614371577 | 0,039913106 |  |
| 209637_s_at  | RGS12            | -0,57445847 | -0,614371577 | 0,039913106 |  |
| 230266_at    | RAB7B            | -0,57445847 | -0,614371577 | 0,039913106 |  |



|              |                  |              |              |             |  |
|--------------|------------------|--------------|--------------|-------------|--|
| 231137_at    | IDH3A            | -0,57445847  | -0,614371577 | 0,039913106 |  |
| 231949_at    | -                | -0,57445847  | -0,614371577 | 0,039913106 |  |
| 237131_at    | RIIAD1           | -0,57445847  | -0,614371577 | 0,039913106 |  |
| 239224_at    | FBXL20           | -0,57445847  | -0,614371577 | 0,039913106 |  |
| 243420_at    | -                | -0,57445847  | -0,614371577 | 0,039913106 |  |
| 226572_at    | SOC57            | 1,758252436  | 1,718396606  | 0,039855831 |  |
| 231870_s_at  | NMD3             | 4,895888063  | 4,856033707  | 0,039854356 |  |
| 230811_at    | C16orf55         | 1,027166904  | 0,987376598  | 0,039790307 |  |
| 243224_at    | -                | 1,027166904  | 0,987376598  | 0,039790307 |  |
| 212809_at    | NFATC2IP         | 3,034656185  | 2,994948944  | 0,039707241 |  |
| 218656_s_at  | LHFP             | 2,259277178  | 2,21959457   | 0,039682607 |  |
| 204219_s_at  | PSMC1            | 6,128326249  | 6,088687525  | 0,039638725 |  |
| 209825_s_at  | MIR3658 /// UCK  | 3,456984333  | 3,417357537  | 0,039626796 |  |
| 206343_s_at  | NRG1             | 0,457392764  | 0,417770464  | 0,039622301 |  |
| 213038_at    | RNF19B           | 0,457392764  | 0,417770464  | 0,039622301 |  |
| 212057_at    | KIAA0182         | 2,787001691  | 2,747463672  | 0,039538019 |  |
| 234302_s_at  | ALKBH5 /// LOC1  | 3,713497195  | 3,673964604  | 0,039532591 |  |
| 213420_at    | DHX57            | 1,789769151  | 1,750261389  | 0,039507762 |  |
| 214749_s_at  | ARMCX6           | 4,67908296   | 4,639594721  | 0,039488239 |  |
| 203905_at    | PARN             | 3,726584632  | 3,687194562  | 0,039390071 |  |
| 209659_s_at  | CDC16            | 4,485762928  | 4,446449692  | 0,039313236 |  |
| 222994_at    | PRDX5            | 4,396969658  | 4,357702907  | 0,039266752 |  |
| 216031_x_at  | HN1L             | 2,2992452    | 2,259997914  | 0,039247287 |  |
| 210775_x_at  | CASP9            | 1,814495998  | 1,775255987  | 0,039240011 |  |
| 230194_at    | LRPPRC           | 2,814842651  | 2,775606361  | 0,03923629  |  |
| 1553263_at   | USH1G            | 1,079110292  | 1,039887232  | 0,039223061 |  |
| 224079_at    | IL17C            | 1,079110292  | 1,039887232  | 0,039223061 |  |
| 226357_at    | USP19            | 3,302773593  | 3,263564154  | 0,039209439 |  |
| 201344_at    | UBE2D2           | 0,496120222  | 0,456918297  | 0,039201925 |  |
| 219198_at    | GTF3C4           | 2,503131904  | 2,464004877  | 0,039127027 |  |
| 208629_s_at  | HADHA            | 3,410096504  | 3,370970266  | 0,039126238 |  |
| 201114_x_at  | PSMA7            | 6,387560618  | 6,348452607  | 0,039108011 |  |
| 1556385_at   | -                | -0,496991414 | -0,536087151 | 0,039095737 |  |
| 204086_at    | PRAME            | -0,496991414 | -0,536087151 | 0,039095737 |  |
| 212668_at    | SMURF1           | -0,496991414 | -0,536087151 | 0,039095737 |  |
| 228924_s_at  | UBE2J1           | -0,496991414 | -0,536087151 | 0,039095737 |  |
| 233089_at    | QRSL1            | -0,496991414 | -0,536087151 | 0,039095737 |  |
| 1557961_s_at | LOC100127983     | 2,314494121  | 2,275409734  | 0,039084386 |  |
| 218220_at    | C12orf10         | 2,314494121  | 2,275409734  | 0,039084386 |  |
| 220926_s_at  | EDEM3            | 2,967339888  | 2,928263672  | 0,039076217 |  |
| 235197_s_at  | OSTM1            | 0,518867317  | 0,479907041  | 0,038960276 |  |
| 236453_at    | -                | 0,518867317  | 0,479907041  | 0,038960276 |  |
| 1553269_at   | ZNF718           | 1,104397092  | 1,065442793  | 0,038954299 |  |
| 209158_s_at  | CYTH2            | 2,109966786  | 2,071071048  | 0,038895738 |  |
| 202758_s_at  | RFXANK           | 3,702775533  | 3,663961904  | 0,038813628 |  |
| 225909_at    | LOC728743 /// ZN | 0,533835206  | 0,495031851  | 0,038803356 |  |
| 216520_s_at  | TPT1             | 7,50610055   | 7,46730472   | 0,03879583  |  |
| 64486_at     | CORO1B           | 3,058788109  | 3,019999252  | 0,038788857 |  |
| 202656_s_at  | SERTAD2          | 1,859746653  | 1,820984782  | 0,038761871 |  |
| 223548_at    | SWT1             | 1,859746653  | 1,820984782  | 0,038761871 |  |
| 37793_r_at   | RAD51D           | -0,437435603 | -0,476186332 | 0,03875073  |  |
| 201084_s_at  | BCLAF1           | 5,968301546  | 5,929583479  | 0,038718067 |  |
| 201237_at    | CAPZA2           | 5,298309737  | 5,25960603   | 0,038703708 |  |
| 205788_s_at  | ZC3H11A          | 4,674447146  | 4,635761472  | 0,038685674 |  |
| 238653_at    | -                | 2,352981171  | 2,314300277  | 0,038680894 |  |
| 227611_at    | TARSL2           | 2,546213279  | 2,507538456  | 0,038674823 |  |

|              |                 |              |              |             |  |
|--------------|-----------------|--------------|--------------|-------------|--|
| 203401_at    | PRPS2           | 4,404623843  | 4,365953461  | 0,038670383 |  |
| 204084_s_at  | CLN5            | 2,549899391  | 2,511262629  | 0,038636762 |  |
| 210425_x_at  | GOLGA8A /// GO  | 2,549899391  | 2,511262629  | 0,038636762 |  |
| 208775_at    | XPO1            | 5,552332553  | 5,513720861  | 0,038611692 |  |
| 203241_at    | UVRAG           | 1,874520207  | 1,835911187  | 0,03860902  |  |
| 226835_s_at  | ZNFX1-AS1       | 6,477703621  | 6,439097679  | 0,038605943 |  |
| 231110_at    | -               | 0,555999837  | 0,51742585   | 0,038573986 |  |
| 232177_at    | -               | 0,555999837  | 0,51742585   | 0,038573986 |  |
| 238065_at    | TPM3            | 0,555999837  | 0,51742585   | 0,038573986 |  |
| 201437_s_at  | EIF4E           | 4,443783893  | 4,405262601  | 0,038521292 |  |
| 223021_x_at  | VTA1            | 4,317567252  | 4,279061697  | 0,038505555 |  |
| 201644_at    | TSTA3           | 3,812716554  | 3,77423254   | 0,038484013 |  |
| 209087_x_at  | MCAM            | 4,657462947  | 4,619032017  | 0,03843093  |  |
| 1553221_at   | ZNF583          | 0,57058931   | 0,532164371  | 0,03842494  |  |
| 227891_s_at  | TAF15           | 0,57058931   | 0,532164371  | 0,03842494  |  |
| 213531_s_at  | RAB3GAP1        | 4,723824182  | 4,685434648  | 0,038389534 |  |
| 232150_at    | -               | 1,897847661  | 1,859476797  | 0,038370864 |  |
| 201398_s_at  | TRAM1           | 5,162251088  | 5,12389408   | 0,038357008 |  |
| 206459_s_at  | WNT2B           | -0,423248115 | -0,461594427 | 0,038346311 |  |
| 206630_at    | TYR             | -0,423248115 | -0,461594427 | 0,038346311 |  |
| 209885_at    | RHOD            | -0,423248115 | -0,461594427 | 0,038346311 |  |
| 229130_at    | -               | -0,423248115 | -0,461594427 | 0,038346311 |  |
| 230353_at    | LOC284112 /// M | -0,423248115 | -0,461594427 | 0,038346311 |  |
| 232555_at    | CREB5           | -0,423248115 | -0,461594427 | 0,038346311 |  |
| 236150_at    | AGPHD1          | -0,423248115 | -0,461594427 | 0,038346311 |  |
| 242913_at    | CLIC6           | -0,423248115 | -0,461594427 | 0,038346311 |  |
| 209239_at    | NFKB1           | 1,903621061  | 1,865308541  | 0,03831252  |  |
| 226510_at    | HEATR5A         | 2,752227654  | 2,713921281  | 0,038306373 |  |
| 229106_at    | DYNLL2          | 1,168140757  | 1,129843209  | 0,038297548 |  |
| 1558143_a_at | BCL2L11         | 2,908260915  | 2,869995113  | 0,038265802 |  |
| 213646_x_at  | LOC100288366 /  | 7,942053631  | 7,903813681  | 0,03823995  |  |
| 232682_at    | MREG            | 1,593009234  | 1,55481039   | 0,038198844 |  |
| 220486_x_at  | TMEM164         | 2,400710591  | 2,362515214  | 0,038195378 |  |
| 230738_at    | -               | 0,606430281  | 0,568365095  | 0,038065186 |  |
| 64440_at     | IL17RC          | 0,606430282  | 0,568365096  | 0,038065186 |  |
| 221265_s_at  | C15orf44        | 2,933877275  | 2,895866687  | 0,038010588 |  |
| 225120_at    | PURB            | 2,933877275  | 2,895866687  | 0,038010588 |  |
| 214201_x_at  | PRRC2A          | 2,790121796  | 2,752192409  | 0,037929387 |  |
| 235121_at    | ZNF542          | 2,943717636  | 2,905803877  | 0,037913759 |  |
| 205353_s_at  | PEBP1           | 4,430348443  | 4,392446485  | 0,037901958 |  |
| 221090_s_at  | OGFOD1          | 2,947914474  | 2,910041809  | 0,037872665 |  |
| 214471_x_at  | LHB             | 0,627515113  | 0,589657387  | 0,037857726 |  |
| 200869_at    | RPL18A          | 7,752578285  | 7,714729755  | 0,03784853  |  |
| 207069_s_at  | SMAD6           | 1,215326747  | 1,177496821  | 0,037829927 |  |
| 235424_at    | -               | 1,215326747  | 1,177496821  | 0,037829927 |  |
| 235457_at    | MAML2           | 1,215326747  | 1,177496821  | 0,037829927 |  |
| 223847_s_at  | ERGIC1          | 2,220484971  | 2,182705233  | 0,037779738 |  |
| 212687_at    | LIMS1           | 5,846393664  | 5,808627689  | 0,037765974 |  |
| 225844_at    | POLE4           | 4,161279609  | 4,123521175  | 0,037758434 |  |
| 214110_s_at  | -               | 1,960118853  | 1,922365006  | 0,037753847 |  |
| 242560_at    | FANCD2          | 3,098971025  | 3,061230246  | 0,037740779 |  |
| 1552663_a_at | ERC1            | 0,641402394  | 0,603679647  | 0,037722748 |  |
| 210203_at    | CNOT4           | 0,641402394  | 0,603679647  | 0,037722748 |  |
| 214169_at    | SUN1            | 0,641402394  | 0,603679647  | 0,037722748 |  |
| 219047_s_at  | ZNF668          | 0,641402394  | 0,603679647  | 0,037722748 |  |
| 226663_at    | ANKRD10 /// ANI | 0,641402394  | 0,603679647  | 0,037722748 |  |

|              |                 |              |              |             |  |
|--------------|-----------------|--------------|--------------|-------------|--|
| 227682_at    | -               | 0,641402394  | 0,603679647  | 0,037722748 |  |
| 213908_at    | WHAMMP2 /// W   | -0,352951799 | -0,39061235  | 0,037660552 |  |
| 215788_at    | KIAA1751        | -0,352951799 | -0,39061235  | 0,037660552 |  |
| 228424_at    | NAALADL1        | -0,352951799 | -0,39061235  | 0,037660552 |  |
| 229515_at    | PAWR            | -0,352951799 | -0,39061235  | 0,037660552 |  |
| 226018_at    | C7orf41         | 2,817903185  | 2,780243895  | 0,03765929  |  |
| 217863_at    | PIAS1           | 2,825526235  | 2,787940144  | 0,037586091 |  |
| 200028_s_at  | STARD7          | 5,441361398  | 5,403817384  | 0,037544014 |  |
| 213474_at    | KCTD7 /// RABG  | 0,661985843  | 0,624460759  | 0,037525083 |  |
| 236615_at    | -               | 0,661985843  | 0,624460759  | 0,037525083 |  |
| 238519_at    | DDI2 /// RSC1A1 | 2,250242994  | 2,212749286  | 0,037493708 |  |
| 217973_at    | DCXR            | 4,309979162  | 4,272493466  | 0,037485697 |  |
| 212406_s_at  | PCMTD2          | 4,190500971  | 4,15302303   | 0,037477941 |  |
| 235244_at    | CCDC58          | 2,47626436   | 2,438805127  | 0,037459233 |  |
| 209288_s_at  | CDC42EP3        | 3,917011805  | 3,879554231  | 0,037457574 |  |
| 204827_s_at  | CCNF            | 0,67554678   | 0,638150376  | 0,037396404 |  |
| 214335_at    | RPL18           | 0,67554678   | 0,638150376  | 0,037396404 |  |
| 229325_at    | ZZZ3            | 1,261018186  | 1,223626587  | 0,037391598 |  |
| 243747_at    | ZNF599          | 1,261018186  | 1,223626587  | 0,037391598 |  |
| 224859_at    | CD276           | 2,485917452  | 2,448549499  | 0,037367953 |  |
| 1552670_a_at | PPP1R3B         | 1,274448124  | 1,23718272   | 0,037265404 |  |
| 1555088_x_at | STAT5B          | 1,274448124  | 1,23718272   | 0,037265404 |  |
| 211363_s_at  | MTAP            | 1,274448124  | 1,23718272   | 0,037265404 |  |
| 214764_at    | RRP15           | 1,274448124  | 1,23718272   | 0,037265404 |  |
| 224952_at    | TANC2           | 1,274448124  | 1,23718272   | 0,037265404 |  |
| 208833_s_at  | ATXN10          | 5,574216947  | 5,536971059  | 0,037245888 |  |
| 226159_at    | C5orf51         | 3,017453847  | 2,980244813  | 0,037209034 |  |
| 238711_s_at  | ZNF148          | 0,695652136  | 0,658444279  | 0,037207857 |  |
| 224928_at    | SETD7           | 1,283332461  | 1,246149888  | 0,037182572 |  |
| 239295_at    | SRSF12          | 1,283332461  | 1,246149888  | 0,037182572 |  |
| 218291_at    | LAMTOR2         | 3,161745659  | 3,124599694  | 0,037145965 |  |
| 211653_x_at  | AKR1C2 /// LOC1 | 3,61576656   | 3,578681277  | 0,037085283 |  |
| 223377_x_at  | CISH            | 1,296557217  | 1,259496994  | 0,037060223 |  |
| 202874_s_at  | ATP6V1C1        | 4,712768283  | 4,675718863  | 0,03704942  |  |
| 1563229_at   | DLEU2           | -0,285837228 | -0,322870281 | 0,037033053 |  |
| 211416_x_at  | GGTLC1          | -0,285837228 | -0,322870281 | 0,037033053 |  |
| 215395_x_at  | PRSS3P2         | -0,285837228 | -0,322870281 | 0,037033053 |  |
| 230371_at    | HPS6            | -0,285837228 | -0,322870281 | 0,037033053 |  |
| 233006_at    | 38231           | -0,285837228 | -0,322870281 | 0,037033053 |  |
| 200802_at    | SARS            | 4,473685138  | 4,436691079  | 0,036994059 |  |
| 55872_at     | ZNF512B         | 3,765149338  | 3,728173203  | 0,036976135 |  |
| 212041_at    | ATP6V0D1        | 4,311065622  | 4,274138329  | 0,036927293 |  |
| 1554516_at   | LINC00537       | 0,728550685  | 0,691645685  | 0,036905    |  |
| 218010_x_at  | PPDPF           | 0,728550685  | 0,691645685  | 0,036905    |  |
| 212497_at    | MAPK1IP1L       | 1,318332599  | 1,281471383  | 0,036861216 |  |
| 229751_s_at  | PUS7L           | 1,318332599  | 1,281471383  | 0,036861216 |  |
| 218777_at    | REEP4           | 2,90394695   | 2,867091644  | 0,036855305 |  |
| 212010_s_at  | CDV3            | 5,825066914  | 5,788244042  | 0,036822872 |  |
| 202098_s_at  | PRMT2           | 4,496785894  | 4,460001797  | 0,036784098 |  |
| 210817_s_at  | CALCOCO2        | 3,444167073  | 3,407399455  | 0,036767619 |  |
| 226360_at    | ZNRF3           | 1,331241794  | 1,294497133  | 0,036744661 |  |
| 210596_at    | MAGT1           | 2,750626925  | 2,713921281  | 0,036705643 |  |
| 211855_s_at  | SLC25A14        | 2,077135162  | 2,040470494  | 0,036664667 |  |
| 227064_at    | ANKRD40         | 2,082235068  | 2,045615873  | 0,036619195 |  |
| 1563853_at   | LOC283045       | 0,760715727  | 0,724100169  | 0,036615557 |  |
| 200897_s_at  | PALLD           | 0,760715727  | 0,724100169  | 0,036615557 |  |

|              |                  |              |              |             |  |
|--------------|------------------|--------------|--------------|-------------|--|
| 239549_at    | -                | 0,760715727  | 0,724100169  | 0,036615557 |  |
| 1555760_a_at | RBM15            | 3,467741468  | 3,431184377  | 0,036557091 |  |
| 205441_at    | OCEL1            | 2,089851283  | 2,053299695  | 0,036551588 |  |
| 222804_x_at  | DCAF10           | 2,089851283  | 2,053299695  | 0,036551588 |  |
| 212439_at    | IP6K1            | 2,580856819  | 2,544354523  | 0,036502295 |  |
| 219352_at    | HERC6            | 2,580856819  | 2,544354523  | 0,036502295 |  |
| 1562695_at   | FOXN4            | -0,221656139 | -0,258114234 | 0,036458095 |  |
| 204150_at    | STAB1            | -0,221656139 | -0,258114234 | 0,036458095 |  |
| 206746_at    | BFSP1            | -0,221656139 | -0,258114234 | 0,036458095 |  |
| 212611_at    | DTX4             | -0,221656139 | -0,258114234 | 0,036458095 |  |
| 222847_s_at  | EGLN3            | -0,221656139 | -0,258114234 | 0,036458095 |  |
| 229918_at    | CCDC40           | -0,221656139 | -0,258114234 | 0,036458095 |  |
| 231054_at    | SPACA4           | -0,221656139 | -0,258114234 | 0,036458095 |  |
| 233719_s_at  | TASP1            | -0,221656139 | -0,258114234 | 0,036458095 |  |
| 240328_at    | -                | -0,221656139 | -0,258114234 | 0,036458095 |  |
| 208878_s_at  | PAK2             | 3,101484927  | 3,065035915  | 0,036449012 |  |
| 200656_s_at  | P4HB             | 4,376876617  | 4,340535652  | 0,036340965 |  |
| 212264_s_at  | WAPAL            | 4,040056475  | 4,003717379  | 0,036339095 |  |
| 215741_x_at  | AKAP8L           | 0,792179257  | 0,755840599  | 0,036338657 |  |
| 206855_s_at  | HYAL2            | 2,114952142  | 2,078620836  | 0,036331306 |  |
| 226867_at    | DENND4C          | 2,382221458  | 2,345926937  | 0,036294521 |  |
| 1554747_a_at | 37500            | 3,506195778  | 3,469974737  | 0,036221041 |  |
| 202753_at    | PSMD6            | 5,615256223  | 5,579053664  | 0,036202559 |  |
| 209084_s_at  | RAB28            | 1,81142822   | 1,775255987  | 0,036172233 |  |
| 227784_s_at  | COG1             | 1,81142822   | 1,775255987  | 0,036172233 |  |
| 213161_at    | TMOD1 /// TSTD   | 2,139623739  | 2,103505212  | 0,036118527 |  |
| 215505_s_at  | STRN3            | 2,402750389  | 2,366632651  | 0,036117738 |  |
| 209620_s_at  | ABCB7            | 3,139900454  | 3,103784293  | 0,036116161 |  |
| 203304_at    | BAMBI            | 3,988699475  | 3,952590169  | 0,036109306 |  |
| 200626_s_at  | MATR3 /// SNHG   | 6,072400675  | 6,036339961  | 0,036060714 |  |
| 201841_s_at  | HSPB1            | 4,781007315  | 4,74496648   | 0,036040835 |  |
| 212154_at    | SDC2             | 3,418185797  | 3,382199319  | 0,035986478 |  |
| 201010_s_at  | TXNIP            | 5,642700556  | 5,606732016  | 0,035968541 |  |
| 223538_at    | SERF1A /// SERP  | 3,158127685  | 3,122166354  | 0,035961331 |  |
| 212309_at    | CLASP2           | 2,644299732  | 2,608344689  | 0,035955043 |  |
| 225402_at    | TP53RK           | 4,08838118   | 4,052455702  | 0,035925478 |  |
| 224458_at    | TMEM246          | 4,162483976  | 4,126559358  | 0,035924618 |  |
| 204972_at    | OAS2             | 0,841135803  | 0,805216064  | 0,035919739 |  |
| 212190_at    | SERPINE2         | 0,841135803  | 0,805216064  | 0,035919739 |  |
| 221917_s_at  | GRSF1            | 0,841135803  | 0,805216064  | 0,035919739 |  |
| 223089_at    | VEZT             | 0,841135803  | 0,805216064  | 0,035919739 |  |
| 243806_at    | -                | 0,841135803  | 0,805216064  | 0,035919739 |  |
| 227686_at    | OXNAD1           | 3,01878441   | 2,982929462  | 0,035854948 |  |
| 223522_at    | MIR600 /// MIR60 | 0,853119696  | 0,817300337  | 0,035819359 |  |
| 206284_x_at  | CLTB             | 2,661438684  | 2,625627364  | 0,03581132  |  |
| 206364_at    | KIF14            | 2,178241192  | 2,14244844   | 0,035792752 |  |
| 203730_s_at  | ZKSCAN5          | 1,446464021  | 1,410714371  | 0,035749649 |  |
| 203834_s_at  | TGOLN2           | 1,446464021  | 1,410714371  | 0,035749649 |  |
| 204474_at    | ZNF142           | 1,446464021  | 1,410714371  | 0,035749649 |  |
| 225656_at    | EFHC1            | 1,446464021  | 1,410714371  | 0,035749649 |  |
| 209902_at    | ATR              | 1,454352496  | 1,418668082  | 0,035684414 |  |
| 222874_s_at  | CLN8             | 1,454352496  | 1,418668082  | 0,035684414 |  |
| 52078_at     | TMEM222          | 2,870437551  | 2,834761772  | 0,035675778 |  |
| 223818_s_at  | RSF1             | 0,87091093   | 0,835239052  | 0,035671878 |  |
| 228482_at    | CDRT4 /// FAM18  | 0,87091093   | 0,835239052  | 0,035671878 |  |
| 235076_at    | CALCOCO2         | 0,87091093   | 0,835239052  | 0,035671878 |  |

|              |                |             |             |             |  |
|--------------|----------------|-------------|-------------|-------------|--|
| 1555630_a_at | NARR /// RAB34 | 3,96128107  | 3,925633118 | 0,035647951 |  |
| 224914_s_at  | SARNP          | 4,400036207 | 4,364410072 | 0,035626135 |  |
| 222714_s_at  | LACTB2         | 4,208686884 | 4,173144843 | 0,035542041 |  |
| 215780_s_at  | SET /// SETP4  | 5,642268985 | 5,606732016 | 0,035536969 |  |
| 200035_at    | CTDNEP1        | 3,474545391 | 3,439026336 | 0,035519055 |  |
| 226173_at    | TBC1D25        | 1,894952274 | 1,859476797 | 0,035475477 |  |
| 204080_at    | TOE1           | 2,218170265 | 2,182705233 | 0,035465032 |  |
| 204155_s_at  | SIK3           | 0,900083947 | 0,864649967 | 0,03543398  |  |
| 229069_at    | SARNP          | 0,900083947 | 0,864649967 | 0,03543398  |  |
| 228346_at    | ZNF844         | 1,485482016 | 1,450051551 | 0,035430465 |  |
| 212287_at    | SUZ12          | 4,608815095 | 4,573447849 | 0,035367246 |  |
| 212875_s_at  | C2CD2          | 2,493593689 | 2,458228496 | 0,035365193 |  |
| 227700_x_at  | ATAD3A         | 3,815781597 | 3,780418488 | 0,035363109 |  |
| 212794_s_at  | KIAA1033       | 0,911589958 | 0,876248481 | 0,035341477 |  |
| 219375_at    | CEPT1          | 2,724770722 | 2,689475799 | 0,035294923 |  |
| 201988_s_at  | CREBL2         | 1,504602299 | 1,469325098 | 0,035277201 |  |
| 227871_at    | CHM            | 1,504602299 | 1,469325098 | 0,035277201 |  |
| 203258_at    | DRAP1          | 2,919702154 | 2,884425449 | 0,035276705 |  |
| 226619_at    | SENP1          | 2,243430036 | 2,208167653 | 0,035262384 |  |
| 220755_s_at  | C6orf48        | 5,857776633 | 5,822558197 | 0,035218436 |  |
| 226987_at    | RBM15B         | 0,928678725 | 0,893473268 | 0,035205457 |  |
| 204767_s_at  | FEN1           | 4,929879398 | 4,894683437 | 0,035195961 |  |
| 226823_at    | PHACTR4        | 3,643632572 | 3,608541373 | 0,035091198 |  |
| 223082_at    | SH3KBP1        | 4,757289776 | 4,72225126  | 0,035038516 |  |
| 213701_at    | C12orf29       | 3,858765357 | 3,823741953 | 0,035023404 |  |
| 215566_x_at  | LYPLA2         | 2,952099138 | 2,917077481 | 0,035021657 |  |
| 214988_s_at  | SON            | 5,444830147 | 5,409815321 | 0,035014826 |  |
| 205346_at    | ST3GAL2        | 0,95671774  | 0,921731975 | 0,034985765 |  |
| 214780_s_at  | MYO9B          | 0,95671774  | 0,921731975 | 0,034985765 |  |
| 222991_s_at  | UBQLN1         | 3,866915053 | 3,831954914 | 0,034960139 |  |
| 209246_at    | ABCF2          | 2,546213279 | 2,511262629 | 0,03495065  |  |
| 1554577_a_at | PSMD10         | 3,868391882 | 3,833443169 | 0,034948713 |  |
| 200081_s_at  | RPS6           | 7,708630465 | 7,673725451 | 0,034905014 |  |
| 201100_s_at  | USP9X          | 5,415581646 | 5,38071872  | 0,034862927 |  |
| 208898_at    | ATP6V1D        | 4,83185274  | 4,796999275 | 0,034853466 |  |
| 205519_at    | WDR76          | 1,560488174 | 1,525647381 | 0,034840793 |  |
| 222056_s_at  | FAHD2A         | 2,787001691 | 2,752192409 | 0,034809282 |  |
| 224954_at    | SHMT1          | 2,305800198 | 2,271023131 | 0,034777067 |  |
| 204059_s_at  | ME1            | 0,984222186 | 0,949447784 | 0,034774402 |  |
| 214625_s_at  | MINK1          | 0,984222186 | 0,949447784 | 0,034774402 |  |
| 218021_at    | DHRS4 /// DHRS | 2,994644467 | 2,959949103 | 0,034695365 |  |
| 218324_s_at  | SPATS2         | 0,995078803 | 0,960386719 | 0,034692083 |  |
| 209898_x_at  | ITSN2          | 3,004080279 | 2,969455976 | 0,034624303 |  |
| 209218_at    | SQLE           | 6,093075084 | 6,058462275 | 0,03461281  |  |
| 227259_at    | CD47           | 1,011212064 | 0,976641161 | 0,034570903 |  |
| 222801_s_at  | STAG3L4        | 1,596577845 | 1,562009954 | 0,034567891 |  |
| 223805_at    | OSBPL6         | 4,019599615 | 3,985091175 | 0,034508439 |  |
| 206123_at    | LLGL1          | 1,021868205 | 0,987376598 | 0,034491608 |  |
| 219333_s_at  | CAPN10         | 1,021868205 | 0,987376598 | 0,034491608 |  |
| 228364_at    | ZNF784         | 1,021868205 | 0,987376598 | 0,034491608 |  |
| 222010_at    | SNORA29 /// TC | 3,608715137 | 3,574237491 | 0,034477646 |  |
| 220099_s_at  | LUC7L2         | 5,025312571 | 4,990846468 | 0,034466103 |  |
| 229863_s_at  | C3orf75        | 2,611163891 | 2,576704359 | 0,034459532 |  |
| 212435_at    | TRIM33         | 2,837639949 | 2,803210557 | 0,034429391 |  |
| 225153_at    | GFM1           | 4,20284547  | 4,168435485 | 0,034409986 |  |
| 214106_s_at  | GMDS           | 1,631786706 | 1,59747851  | 0,034308196 |  |

|              |                   |             |             |             |  |
|--------------|-------------------|-------------|-------------|-------------|--|
| 225160_x_at  | MDM2              | 1,04816921  | 1,013870809 | 0,034298401 |  |
| 229018_at    | C12orf26          | 1,64218396  | 1,60795124  | 0,03423272  |  |
| 226703_at    | NEURL4            | 1,063722698 | 1,029536893 | 0,034185804 |  |
| 206167_s_at  | ARHGAP6           | 4,159471171 | 4,125344852 | 0,034126319 |  |
| 223580_at    | SPSB2             | 1,073999308 | 1,039887232 | 0,034112077 |  |
| 225040_s_at  | LOC729020 /// R   | 3,882346871 | 3,848241888 | 0,034104983 |  |
| 202562_s_at  | C14orf1           | 3,776205896 | 3,742106442 | 0,034099454 |  |
| 209536_s_at  | EHD4              | 3,248232277 | 3,21415095  | 0,034081327 |  |
| 218862_at    | ASB13             | 1,666156729 | 1,632095957 | 0,034060772 |  |
| 223507_at    | CLPX              | 2,410880861 | 2,376875125 | 0,034005736 |  |
| 228347_at    | SIX1              | 2,410880861 | 2,376875125 | 0,034005736 |  |
| 207627_s_at  | TFCP2             | 1,67631007  | 1,642321262 | 0,033988808 |  |
| 90610_at     | LRCH4             | 2,683419202 | 2,649480478 | 0,033938724 |  |
| 1553569_at   | COX2              | 8,22705635  | 8,193185275 | 0,033871075 |  |
| 208896_at    | DDX18             | 4,35912833  | 4,32527877  | 0,03384956  |  |
| 203869_at    | USP46             | 1,699726954 | 1,665902186 | 0,033824769 |  |
| 225902_at    | PPIG              | 1,699726954 | 1,665902186 | 0,033824769 |  |
| 224626_at    | SLC35A4           | 2,922548342 | 2,888726553 | 0,033821789 |  |
| 203189_s_at  | MIR4691 /// NDU   | 3,823415835 | 3,789647959 | 0,033767877 |  |
| 217928_s_at  | PPP6R3            | 2,132266459 | 2,098562556 | 0,033703903 |  |
| 213427_at    | RPP40             | 4,657462947 | 4,623770256 | 0,03369269  |  |
| 204507_s_at  | PPP3R1            | 4,22203305  | 4,188344947 | 0,033688103 |  |
| 206063_x_at  | PPIL2             | 1,139070151 | 1,105412836 | 0,033657315 |  |
| 225059_at    | AGTRAP            | 1,726031811 | 1,692388143 | 0,033643668 |  |
| 218055_s_at  | WDR41             | 2,954882186 | 2,921282473 | 0,033599713 |  |
| 223273_at    | C14orf142         | 3,734704399 | 3,701119714 | 0,033584685 |  |
| 224978_s_at  | USP36             | 1,735773781 | 1,702196344 | 0,033577437 |  |
| 221823_at    | C5orf30           | 2,156646206 | 2,123108223 | 0,033537983 |  |
| 223079_s_at  | GLS               | 2,156646206 | 2,123108223 | 0,033537983 |  |
| 203597_s_at  | WBP4              | 1,163336153 | 1,129843209 | 0,033492944 |  |
| 225851_at    | CHURC1-FNTB /     | 2,485917452 | 2,452428893 | 0,033488558 |  |
| 222458_s_at  | AKIRIN1           | 2,979690938 | 2,946258252 | 0,033432686 |  |
| 233746_x_at  | C15orf63 /// MIR1 | 4,176858496 | 4,143455947 | 0,033402549 |  |
| 231770_x_at  | WDPCP             | 1,177702228 | 1,144305291 | 0,033396937 |  |
| 219600_s_at  | TMEM50B           | 4,178645282 | 4,145254615 | 0,033390668 |  |
| 226343_at    | DPP8              | 2,501229299 | 2,467842989 | 0,03338631  |  |
| 218069_at    | DCTPP1            | 4,993182736 | 4,959839678 | 0,033343058 |  |
| 207785_s_at  | RBPJ              | 3,901227032 | 3,86798237  | 0,033244662 |  |
| 219296_at    | ZDHHC13           | 1,201332287 | 1,16809119  | 0,033241096 |  |
| 200046_at    | DAD1              | 6,26782071  | 6,234582224 | 0,033238485 |  |
| 201596_x_at  | KRT18             | 1,210676994 | 1,177496821 | 0,033180173 |  |
| 212000_at    | SUGP2             | 1,210676994 | 1,177496821 | 0,033180173 |  |
| 230048_at    | IFRD1             | 1,210676994 | 1,177496821 | 0,033180173 |  |
| 221554_at    | STRADA            | 1,799091453 | 1,765933685 | 0,033157769 |  |
| 1565162_s_at | MGST1             | 2,804079361 | 2,770953871 | 0,03312549  |  |
| 228420_at    | PDCD2             | 1,224581536 | 1,191491281 | 0,033090255 |  |
| 218233_s_at  | PRICKLE4 /// TO   | 6,912507794 | 6,87942671  | 0,033081084 |  |
| 215113_s_at  | SENP3 /// SENP3   | 1,814495998 | 1,781437557 | 0,033058441 |  |
| 238729_x_at  | SAV1              | 1,233777334 | 1,200746069 | 0,033031264 |  |
| 212710_at    | CAMSAP1           | 1,823660386 | 1,790660532 | 0,032999854 |  |
| 217882_at    | EMC3              | 4,327801949 | 4,294812548 | 0,032989401 |  |
| 202107_s_at  | MCM2              | 4,329411337 | 4,296432174 | 0,032979163 |  |
| 200008_s_at  | GDI2              | 5,288690404 | 5,255726156 | 0,032964248 |  |
| 220633_s_at  | HP1BP3            | 1,829737795 | 1,796776588 | 0,032961208 |  |
| 235443_at    | LOC100131067      | 1,247462054 | 1,214517879 | 0,032944175 |  |
| 236077_at    | GANC              | 0,255492549 | 0,222599095 | 0,032893455 |  |

|              |                 |             |             |             |  |
|--------------|-----------------|-------------|-------------|-------------|--|
| 239493_at    | RPL7            | 0,255492549 | 0,222599095 | 0,032893455 |  |
| 239106_at    | -               | 3,262904562 | 3,23005767  | 0,032846892 |  |
| 222845_x_at  | TMBIM4          | 4,725862305 | 4,69303748  | 0,032824826 |  |
| 203308_x_at  | HPS1            | 1,269985355 | 1,23718272  | 0,032802635 |  |
| 200070_at    | CNPPD1          | 1,859746653 | 1,826973888 | 0,032772765 |  |
| 202810_at    | DRG1            | 4,86589008  | 4,83315541  | 0,032734671 |  |
| 225247_at    | C19orf6         | 1,874520207 | 1,841838775 | 0,032681432 |  |
| 238965_at    | C21orf2         | 1,292162421 | 1,259496994 | 0,032665426 |  |
| 227941_at    | LOC339803       | 2,292660284 | 2,259997914 | 0,03266237  |  |
| 210706_s_at  | RNF24           | 3,75400739  | 3,721356767 | 0,032650623 |  |
| 212859_x_at  | LOC100505584 /  | 1,883312263 | 1,85068474  | 0,032627523 |  |
| 201364_s_at  | OAZ2            | 2,632180155 | 2,599625088 | 0,032555068 |  |
| 214314_s_at  | EIF5B           | 3,117719377 | 3,08516499  | 0,032554386 |  |
| 221511_x_at  | CCPG1 /// DYX10 | 1,314003737 | 1,281471383 | 0,032532354 |  |
| 231270_at    | CA13 /// LOC100 | 1,314003737 | 1,281471383 | 0,032532354 |  |
| 200027_at    | NARS            | 6,145329472 | 6,112864255 | 0,032465217 |  |
| 218842_at    | RPAP3           | 3,923419763 | 3,891034012 | 0,032385751 |  |
| 200977_s_at  | TAX1BP1         | 4,868844325 | 4,836499048 | 0,032345277 |  |
| 222028_at    | ZNF45           | 3,154500615 | 3,122166354 | 0,032334261 |  |
| 1570253_a_at | RHEBL1          | 1,932146506 | 1,899812471 | 0,032334035 |  |
| 243943_x_at  | C6orf52         | 1,954567604 | 1,922365006 | 0,032202598 |  |
| 209501_at    | CDR2            | 2,956271699 | 2,924079008 | 0,032192692 |  |
| 228875_at    | FAM162B         | 2,956271699 | 2,924079008 | 0,032192692 |  |
| 215034_s_at  | TM4SF1          | 2,967339888 | 2,935211251 | 0,032128637 |  |
| 225429_at    | PPP6C           | 2,967339888 | 2,935211251 | 0,032128637 |  |
| 225411_at    | TMEM87B         | 2,705069849 | 2,672945617 | 0,032124232 |  |
| 1564746_at   | SLC9B2          | 0,384950573 | 0,352836757 | 0,032113816 |  |
| 225089_at    | USP40           | 0,384950573 | 0,352836757 | 0,032113816 |  |
| 226764_at    | ZNF827          | 0,384950573 | 0,352836757 | 0,032113816 |  |
| 201733_at    | CLCN3           | 1,390002893 | 1,3579181   | 0,032084793 |  |
| 210180_s_at  | TRA2B           | 2,981056773 | 2,949006836 | 0,032049937 |  |
| 214414_x_at  | HBA1 /// HBA2   | 6,650471128 | 6,618565837 | 0,03190529  |  |
| 223630_at    | C7orf13         | 2,745814053 | 2,713921281 | 0,031892772 |  |
| 207812_s_at  | GORASP2         | 4,332089668 | 4,300204247 | 0,031885421 |  |
| 1553354_a_at | FLJ31958        | 0,425644434 | 0,393761504 | 0,031882929 |  |
| 237994_at    | -               | 0,425644434 | 0,393761504 | 0,031882929 |  |
| 242475_at    | -               | 0,425644434 | 0,393761504 | 0,031882929 |  |
| 224819_at    | TCEAL8          | 3,01878441  | 2,986947093 | 0,031837317 |  |
| 203729_at    | EMP3            | 5,652376942 | 5,620590087 | 0,031786855 |  |
| 208659_at    | CLIC1           | 6,751066697 | 6,719303915 | 0,031762782 |  |
| 207388_s_at  | PTGES           | 0,46522187  | 0,433557298 | 0,031664572 |  |
| 214368_at    | RASGRP2         | 0,46522187  | 0,433557298 | 0,031664572 |  |
| 224065_at    | HIPK2           | 0,46522187  | 0,433557298 | 0,031664572 |  |
| 211797_s_at  | NFYC            | 2,051361651 | 2,019703483 | 0,031658169 |  |
| 218597_s_at  | CISD1           | 3,054253462 | 3,022611001 | 0,031642462 |  |
| 209592_s_at  | DCAF7           | 2,470441349 | 2,438805127 | 0,031636222 |  |
| 217977_at    | MSRB1           | 3,795741421 | 3,76412346  | 0,031617962 |  |
| 217608_at    | SREK1IP1        | 1,473887017 | 1,442269454 | 0,031617563 |  |
| 212447_at    | KBTBD2          | 3,062018438 | 3,030417996 | 0,031600442 |  |
| 200062_s_at  | RPL30           | 7,740481836 | 7,708964585 | 0,031517251 |  |
| 35776_at     | ITSN1           | 2,083507233 | 2,052021897 | 0,031485336 |  |
| 213507_s_at  | KPNB1           | 6,467203544 | 6,435733475 | 0,031470068 |  |
| 226457_at    | -               | 1,512180019 | 1,480766833 | 0,031413186 |  |
| 223219_s_at  | CNOT10          | 2,097427503 | 2,066015817 | 0,031411685 |  |
| 204266_s_at  | CHKA            | 2,837639949 | 2,806245339 | 0,031394609 |  |
| 211270_x_at  | PTBP1           | 5,97996145  | 5,948592109 | 0,031369341 |  |

|              |                  |             |             |             |  |
|--------------|------------------|-------------|-------------|-------------|--|
| 212073_at    | CSNK2A1 /// CSN  | 3,329826127 | 3,298466943 | 0,031359184 |  |
| 1553715_s_at | FAM195A          | 3,857278636 | 3,825986493 | 0,031292143 |  |
| 235256_s_at  | GALM             | 3,343695493 | 3,312408479 | 0,031287015 |  |
| 203925_at    | GCLM             | 3,348994562 | 3,317734938 | 0,031259625 |  |
| 208848_at    | ADH5             | 3,359534664 | 3,32832922  | 0,031205444 |  |
| 208714_at    | NDUFV1           | 4,361752105 | 4,330558009 | 0,031194096 |  |
| 204053_x_at  | PTEN             | 3,363729238 | 3,332545245 | 0,031183993 |  |
| 224769_at    | TAOK1            | 3,895444023 | 3,864347045 | 0,031096978 |  |
| 224455_s_at  | ADPGK            | 1,58584542  | 1,55481039  | 0,03103503  |  |
| 208732_at    | RAB2A            | 2,173470163 | 2,14244844  | 0,031021724 |  |
| 231988_x_at  | ZNF490           | 2,173470163 | 2,14244844  | 0,031021724 |  |
| 206583_at    | ZNF673           | 2,589836943 | 2,558821855 | 0,031015089 |  |
| 226753_at    | FAM76B           | 2,589836943 | 2,558821855 | 0,031015089 |  |
| 204094_s_at  | TSC22D2          | 2,919702154 | 2,888726553 | 0,0309756   |  |
| 211943_x_at  | TPT1             | 7,750427418 | 7,719466222 | 0,030961196 |  |
| 219321_at    | MPP5             | 1,603688695 | 1,572742379 | 0,030946316 |  |
| 223470_at    | PIGM             | 2,933877275 | 2,902971658 | 0,030905617 |  |
| 201194_at    | SEPW1            | 4,204015647 | 4,173144843 | 0,030870804 |  |
| 203625_x_at  | SKP2             | 3,428234044 | 3,39737216  | 0,030861884 |  |
| 200014_s_at  | HNRNPC /// LOC   | 5,98252085  | 5,951678905 | 0,030841945 |  |
| 49878_at     | PEX16            | 2,636520272 | 2,605734338 | 0,030785935 |  |
| 230787_at    | LOC100505481     | 1,638726528 | 1,60795124  | 0,030775288 |  |
| 239071_at    | RBBP4            | 1,638726528 | 1,60795124  | 0,030775288 |  |
| 201503_at    | G3BP1            | 5,651304988 | 5,620590087 | 0,030714901 |  |
| 214696_at    | MIR22 /// MIR22H | 2,243430036 | 2,212749286 | 0,03068075  |  |
| 64432_at     | MAPKAPK5-AS1     | 1,247462054 | 1,216800453 | 0,030661601 |  |
| 211040_x_at  | GTSE1            | 3,471633352 | 3,440980183 | 0,030653169 |  |
| 204300_at    | PET112           | 2,261526912 | 2,230931691 | 0,03059522  |  |
| 204887_s_at  | PLK4             | 3,000043914 | 2,969455976 | 0,030587938 |  |
| 201587_s_at  | IRAK1            | 4,00557508  | 3,975013041 | 0,030562039 |  |
| 40189_at     | SET              | 5,496123605 | 5,46558546  | 0,030538146 |  |
| 203530_s_at  | STX4             | 3,010782559 | 2,980244813 | 0,030537746 |  |
| 215699_x_at  | SFI1             | 0,702292136 | 0,67181667  | 0,030475466 |  |
| 227979_at    | RBM4             | 0,702292136 | 0,67181667  | 0,030475466 |  |
| 230271_at    | ONECUT2          | 0,702292136 | 0,67181667  | 0,030475466 |  |
| 225870_s_at  | TRAPPC5          | 3,704430214 | 3,673964604 | 0,03046561  |  |
| 209953_s_at  | CDC37            | 6,256938512 | 6,226604901 | 0,030333611 |  |
| 224890_s_at  | C7orf59          | 3,056846434 | 3,026519779 | 0,030326655 |  |
| 221471_at    | SERINC3          | 4,986397998 | 4,956087342 | 0,030310656 |  |
| 202176_at    | ERCC3            | 2,344516784 | 2,314300277 | 0,030216507 |  |
| 205741_s_at  | DTNA             | 0,767063567 | 0,73688026  | 0,030183306 |  |
| 229841_at    | -                | 0,767063567 | 0,73688026  | 0,030183306 |  |
| 210186_s_at  | FKBP1A           | 4,366985384 | 4,336867701 | 0,030117683 |  |
| 201046_s_at  | RAD23A           | 3,109000457 | 3,078904771 | 0,030095686 |  |
| 216804_s_at  | PDLIM5           | 3,111496958 | 3,081412119 | 0,030084839 |  |
| 232201_at    | NKD2             | 0,798390451 | 0,768343791 | 0,03004666  |  |
| 232865_at    | AFF4             | 0,798390451 | 0,768343791 | 0,03004666  |  |
| 225318_at    | -                | 3,606946883 | 3,576905405 | 0,030041479 |  |
| 229690_at    | FAM109A          | 1,81142822  | 1,781437557 | 0,029990663 |  |
| 201528_at    | RPA1             | 5,47616359  | 5,446261552 | 0,029902038 |  |
| 203038_at    | PTPRK            | 1,835789711 | 1,805902329 | 0,029887382 |  |
| 203267_s_at  | DRG2             | 1,835789711 | 1,805902329 | 0,029887382 |  |
| 216873_s_at  | ATP8B2           | 1,841816345 | 1,811954245 | 0,029862101 |  |
| 221475_s_at  | RPL15            | 7,302732218 | 7,272944883 | 0,029787335 |  |
| 219351_at    | TRAPPC2          | 3,18563636  | 3,155865206 | 0,029771154 |  |
| 203142_s_at  | AP3B1            | 3,188003814 | 3,158242412 | 0,029761401 |  |



|              |                 |             |             |             |  |
|--------------|-----------------|-------------|-------------|-------------|--|
| 222699_s_at  | PLEKHF2         | 3,886725813 | 3,857048799 | 0,029677014 |  |
| 241786_at    | -               | 1,894952274 | 1,865308541 | 0,029643732 |  |
| 201722_s_at  | GALNT1          | 5,287586957 | 5,257944504 | 0,029642452 |  |
| 201599_at    | OAT             | 5,55279188  | 5,523204285 | 0,029587595 |  |
| 1558942_at   | ZNF765          | 3,236843482 | 3,207279726 | 0,029563756 |  |
| 217833_at    | SYNCRIP         | 4,501552344 | 4,471995246 | 0,029557098 |  |
| 218165_at    | MEAF6           | 4,08838118  | 4,058831494 | 0,029549686 |  |
| 210466_s_at  | SERBP1          | 6,382530778 | 6,352999488 | 0,02953129  |  |
| 210844_x_at  | CTNNA1          | 4,246090231 | 4,216563145 | 0,029527086 |  |
| 220637_at    | FAM124B         | 0,934330293 | 0,904843258 | 0,029487034 |  |
| 202894_at    | EPHB4           | 2,522021211 | 2,492544876 | 0,029476335 |  |
| 203366_at    | POLG            | 1,937784532 | 1,908311039 | 0,029473492 |  |
| 226527_at    | RPRD2           | 1,946200473 | 1,916759838 | 0,029440635 |  |
| 211370_s_at  | MAP2K5          | 0,962260738 | 0,932882274 | 0,029378464 |  |
| 214077_x_at  | MEIS3P1         | 0,962260738 | 0,932882274 | 0,029378464 |  |
| 224673_at    | LENG8           | 0,962260738 | 0,932882274 | 0,029378464 |  |
| 235124_at    | LOC645212       | 0,962260738 | 0,932882274 | 0,029378464 |  |
| 231901_at    | C19orf52        | 4,294682191 | 4,265343974 | 0,029338217 |  |
| 202353_s_at  | PSMD12          | 3,310399576 | 3,281121096 | 0,02927848  |  |
| 222523_at    | SENP2           | 2,582657321 | 2,553413592 | 0,029243728 |  |
| 217393_x_at  | UBE2NL          | 4,461994552 | 4,432769076 | 0,029225476 |  |
| 202301_s_at  | RSRC2           | 3,002736078 | 2,973511251 | 0,029224828 |  |
| 36994_at     | ATP6V0C         | 5,050901237 | 5,021690504 | 0,029210733 |  |
| 214670_at    | ZKSCAN1         | 2,014487247 | 1,98530622  | 0,029181027 |  |
| 242648_at    | KLHL8           | 3,343695493 | 3,314541423 | 0,029154071 |  |
| 233757_x_at  | -               | 3,024094427 | 2,994948944 | 0,029145483 |  |
| 226505_x_at  | USP32           | 3,348994562 | 3,319860027 | 0,029134535 |  |
| 201713_s_at  | RANBP2          | 4,217404896 | 4,188344947 | 0,029059949 |  |
| 208928_at    | POR             | 2,061726373 | 2,032717854 | 0,029008519 |  |
| 320_at       | PEX6            | 0,062557792 | 0,033557811 | 0,028999981 |  |
| 227013_at    | LATS2           | 2,658027143 | 2,629059192 | 0,028967951 |  |
| 228588_s_at  | UBE2B           | 3,081249977 | 3,052311115 | 0,028938862 |  |
| 1558700_s_at | ZNF260          | 4,253455927 | 4,224525141 | 0,028930786 |  |
| 209184_s_at  | IRS2            | 1,094335495 | 1,065442793 | 0,028892702 |  |
| 227663_at    | -               | 2,094906514 | 2,066015817 | 0,028890697 |  |
| 200881_s_at  | DNAJA1          | 6,384983404 | 6,356109089 | 0,028874315 |  |
| 211074_at    | -               | 2,701760055 | 2,672945617 | 0,028814438 |  |
| 214698_at    | PTBP3           | 1,119359127 | 1,090553537 | 0,02880559  |  |
| 223252_at    | HDGFRP2         | 2,11992033  | 2,091116676 | 0,028803654 |  |
| 213670_x_at  | NSUN5P1         | 2,139623739 | 2,110887591 | 0,028736148 |  |
| 205084_at    | BCAP29          | 1,143956113 | 1,115234684 | 0,028721429 |  |
| 227492_at    | LOC647859 /// O | 2,171078719 | 2,14244844  | 0,02863028  |  |
| 213246_at    | C14orf109       | 3,979845523 | 3,951219941 | 0,028625582 |  |
| 227932_at    | ARIH2           | 2,764969948 | 2,7363693   | 0,028600648 |  |
| 204448_s_at  | PDCL            | 2,194816625 | 2,166264721 | 0,028551904 |  |
| 223222_at    | SLC25A19        | 2,804079361 | 2,775606361 | 0,028473    |  |
| 202633_at    | TOPBP1          | 4,036776538 | 4,008336597 | 0,028439941 |  |
| 203392_s_at  | CTBP1           | 4,404623843 | 4,376200741 | 0,028423102 |  |
| 204766_s_at  | NUDT1           | 2,827046023 | 2,798646381 | 0,028399643 |  |
| 218104_at    | TEX10           | 4,247793348 | 4,219411762 | 0,028381586 |  |
| 224891_at    | FOXO3           | 4,575748639 | 4,547386035 | 0,028362604 |  |
| 1555874_x_at | MGC21881        | 2,254767157 | 2,226407528 | 0,028359629 |  |
| 222995_s_at  | RHBDD2          | 2,259277178 | 2,230931691 | 0,028345486 |  |
| 208908_s_at  | CAST            | 2,849652795 | 2,821324225 | 0,02832857  |  |
| 224623_at    | LOC728554 /// T | 3,852063011 | 3,823741953 | 0,028321058 |  |
| 217887_s_at  | EPS15           | 3,590934306 | 3,562619178 | 0,028315128 |  |

|              |                 |             |             |             |  |
|--------------|-----------------|-------------|-------------|-------------|--|
| 214283_at    | TMEM97          | 2,281618189 | 2,253342112 | 0,028276077 |  |
| 1555847_a_at | LOC284454       | 2,288253583 | 2,259997914 | 0,028255669 |  |
| 209939_x_at  | CFLAR           | 5,199102221 | 5,170858681 | 0,02824354  |  |
| 225629_s_at  | ZBTB4           | 2,292660284 | 2,264418116 | 0,028242168 |  |
| 217828_at    | SLTM            | 4,117238882 | 4,08904909  | 0,028189792 |  |
| 1555193_a_at | ZNF277          | 1,331241794 | 1,303116084 | 0,028125709 |  |
| 212031_at    | RBM25           | 4,814336575 | 4,786280762 | 0,028055812 |  |
| 202853_s_at  | RYK             | 3,358484112 | 3,330438773 | 0,02804534  |  |
| 201359_at    | COPB1           | 4,725454911 | 4,697539161 | 0,02791575  |  |
| 203361_s_at  | GJA9-MYCBP ///  | 2,427005622 | 2,39915583  | 0,027849792 |  |
| 209862_s_at  | CEP57           | 2,436992838 | 2,409170778 | 0,02782206  |  |
| 211761_s_at  | CACYBP          | 5,347321839 | 5,319509282 | 0,027812557 |  |
| 208671_at    | SERINC1         | 4,768801946 | 4,741007135 | 0,027794812 |  |
| 203046_s_at  | TIMELESS        | 3,034656185 | 3,006869115 | 0,02778707  |  |
| 200031_s_at  | RPS11           | 8,145050721 | 8,117326049 | 0,027724672 |  |
| 213892_s_at  | APRT            | 3,067171967 | 3,039473081 | 0,027698886 |  |
| 227125_at    | IFNAR2          | 3,067171967 | 3,039473081 | 0,027698886 |  |
| 218883_s_at  | MLF1IP          | 5,011176618 | 4,983492199 | 0,027684419 |  |
| 208827_at    | PSMB6           | 5,744524656 | 5,716864158 | 0,027660498 |  |
| 219240_s_at  | C10orf88        | 1,496984567 | 1,469325098 | 0,027659469 |  |
| 214305_s_at  | SF3B1           | 2,510717331 | 2,483094137 | 0,027623194 |  |
| 206158_s_at  | CNBP            | 6,106278071 | 6,078682636 | 0,027595435 |  |
| 204367_at    | SP2             | 1,534677255 | 1,507116528 | 0,027560727 |  |
| 224472_x_at  | SDF4            | 3,863216352 | 3,835672678 | 0,027543674 |  |
| 217827_s_at  | SPG21           | 4,360703168 | 4,333190402 | 0,027512766 |  |
| 1569110_x_at | LOC728613       | 3,901227032 | 3,873779903 | 0,027447129 |  |
| 201035_s_at  | HADH            | 2,586251598 | 2,558821855 | 0,027429744 |  |
| 209522_s_at  | CRAT            | 1,607231019 | 1,579853228 | 0,027377791 |  |
| 223568_s_at  | PPAPDC1B        | 1,607231019 | 1,579853228 | 0,027377791 |  |
| 223839_s_at  | SCD             | 3,19743497  | 3,170070041 | 0,027364929 |  |
| 225413_at    | USMG5           | 7,27502272  | 7,247703285 | 0,027319435 |  |
| 201257_x_at  | RPS3A /// SNOR  | 8,148283735 | 8,120986768 | 0,027296968 |  |
| 213214_x_at  | ACTG1           | 7,840606193 | 7,813333862 | 0,027272331 |  |
| 201606_s_at  | PWP1            | 4,250061047 | 4,228222694 | 0,027238353 |  |
| 202154_x_at  | TUBB3           | 4,891899985 | 4,864793325 | 0,027106659 |  |
| 204415_at    | IFI6            | 6,591558544 | 6,564478117 | 0,027080428 |  |
| 218354_at    | TRAPPC2L        | 4,08838118  | 4,061373942 | 0,027007238 |  |
| 203746_s_at  | HCCS            | 5,252954628 | 5,226006411 | 0,026948216 |  |
| 213347_x_at  | RPS4X           | 7,726553789 | 7,699636024 | 0,026917766 |  |
| 231049_at    | LMO2            | 3,397876879 | 3,370970266 | 0,026906613 |  |
| 222047_s_at  | SRRT            | 5,277061897 | 5,250165317 | 0,02689658  |  |
| 210110_x_at  | HNRNPH3         | 4,426844657 | 4,399999158 | 0,026845499 |  |
| 201767_s_at  | ELAC2           | 3,84757742  | 3,820743792 | 0,026833628 |  |
| 222026_at    | RBM3            | 1,868628927 | 1,841838775 | 0,026790152 |  |
| 223334_at    | TMEM126A        | 4,676134621 | 4,649344778 | 0,026789843 |  |
| 212506_at    | PICALM          | 5,578283569 | 5,551512249 | 0,026771321 |  |
| 218631_at    | AVPI1           | 2,882181479 | 2,855418981 | 0,026762498 |  |
| 200716_x_at  | RPL13A /// RPL1 | 7,972907267 | 7,946172884 | 0,026734384 |  |
| 202732_at    | PKIG            | 4,90958085  | 4,882873472 | 0,026707378 |  |
| 231059_x_at  | SCAND1          | 4,235256884 | 4,208556964 | 0,02669992  |  |
| 212334_at    | GNS             | 3,498586477 | 3,471887144 | 0,026699333 |  |
| 202767_at    | ACP2            | 1,926486359 | 1,899812471 | 0,026673889 |  |
| 208595_s_at  | MBD1            | 1,926486359 | 1,899812471 | 0,026673889 |  |
| 227729_at    | -               | 1,926486359 | 1,899812471 | 0,026673889 |  |
| 218516_s_at  | IMPAD1          | 2,926807124 | 2,900133867 | 0,026673257 |  |
| 210006_at    | ABHD14A         | 2,943717636 | 2,917077481 | 0,026640156 |  |

|             |                 |              |              |             |  |
|-------------|-----------------|--------------|--------------|-------------|--|
| 201074_at   | SMARCC1         | 4,767615283  | 4,741007135  | 0,026608149 |  |
| 221523_s_at | RRAGD           | 3,575646363  | 3,549096127  | 0,026550236 |  |
| 201145_at   | HAX1            | 4,336364681  | 4,309858816  | 0,026505865 |  |
| 1557624_at  | -               | 1,027166904  | 1,000684521  | 0,026482383 |  |
| 209751_s_at | TRAPPC2 /// TR  | 3,614006933  | 3,587527995  | 0,026478938 |  |
| 232032_x_at | SDF4            | 4,866629209  | 4,840205135  | 0,026424074 |  |
| 201388_at   | PSMD3           | 3,741167469  | 3,714911743  | 0,026255726 |  |
| 201476_s_at | RRM1            | 3,811181587  | 3,785040604  | 0,026140983 |  |
| 200950_at   | ARPC1A          | 3,831767101  | 3,805658807  | 0,026108294 |  |
| 223160_s_at | SMEK1           | 4,431347964  | 4,405262601  | 0,026085362 |  |
| 226278_at   | SVIP            | 3,852063011  | 3,825986493  | 0,026076519 |  |
| 217947_at   | CMTM6           | 4,660449652  | 4,634481456  | 0,025968196 |  |
| 209860_s_at | ANXA7           | 4,352811731  | 4,326864571  | 0,02594716  |  |
| 227527_at   | MLL2            | 3,366867184  | 3,340940512  | 0,025926672 |  |
| 224788_at   | ARF6            | 4,741661615  | 4,71581024   | 0,025851376 |  |
| 220597_s_at | ARL6IP4         | 2,429008604  | 2,403170156  | 0,025838448 |  |
| 225002_s_at | SUMF2           | 2,438982012  | 2,413157372  | 0,02582464  |  |
| 218203_at   | ALG5            | 4,093441556  | 4,067710529  | 0,025731028 |  |
| 207071_s_at | ACO1            | 3,5222335    | 3,496520471  | 0,02571303  |  |
| 219000_s_at | DSCC1           | 4,598173655  | 4,572556959  | 0,025616696 |  |
| 236305_at   | RFESD           | 3,625406332  | 3,599822964  | 0,025583368 |  |
| 221895_at   | MOSPD2          | 2,637386731  | 2,611817827  | 0,025568905 |  |
| 211921_x_at | LOC100506248 /  | 7,325558139  | 7,300142615  | 0,025415524 |  |
| 202003_s_at | ACAA2           | 3,914869478  | 3,889604025  | 0,025265453 |  |
| 212802_s_at | GAPVD1          | 3,964046478  | 3,938828971  | 0,025217508 |  |
| 203160_s_at | RNF8            | 2,967339888  | 2,942125533  | 0,025214355 |  |
| 201817_at   | UBE3C           | 4,622007457  | 4,59685817   | 0,025149287 |  |
| 206461_x_at | MT1H            | 4,659596938  | 4,634481456  | 0,025115483 |  |
| 212397_at   | RDX             | 4,722599924  | 4,697539161  | 0,025060764 |  |
| 46270_at    | UBAP1           | 2,166283906  | 2,141247242  | 0,025036664 |  |
| 200807_s_at | HSPD1           | 7,687033587  | 7,662046928  | 0,02498666  |  |
| 223155_at   | HDHD2           | 3,27186005   | 3,246908183  | 0,024951867 |  |
| 218366_x_at | METT17          | 4,903471189  | 4,878554857  | 0,024916333 |  |
| 204709_s_at | KIF23           | 2,382221458  | 2,357351836  | 0,024869621 |  |
| 225515_s_at | LOC220906 /// R | 4,583412318  | 4,558677353  | 0,024734966 |  |
| 223305_at   | TMEM216         | 3,709382903  | 3,684723168  | 0,024659734 |  |
| 229450_at   | IFIT3           | 5,331079521  | 5,306440515  | 0,024639006 |  |
| 201735_s_at | CLCN3           | 3,915583941  | 3,891034012  | 0,024549929 |  |
| 212066_s_at | USP34           | 4,075012622  | 4,050537457  | 0,024475165 |  |
| 201550_x_at | ACTG1           | 7,914708405  | 7,8903368    | 0,024371605 |  |
| 218226_s_at | NDUFB4          | 5,875878037  | 5,851583612  | 0,024294425 |  |
| 211747_s_at | LSM5            | 5,659218655  | 5,634956531  | 0,024262124 |  |
| 1552452_at  | WDR88           | -2,43257096  | -2,456406426 | 0,023835466 |  |
| 1552506_at  | CRB2            | -2,063149277 | -2,086984744 | 0,023835466 |  |
| 1552734_at  | RICTOR          | -2,311268652 | -2,335104118 | 0,023835466 |  |
| 1552872_at  | ASMTL-AS1       | -1,399512875 | -1,423348341 | 0,023835466 |  |
| 1552906_at  | FMR1NB          | -3,07502285  | -3,098858316 | 0,023835466 |  |
| 1552922_at  | RIMS1           | -3,013665402 | -3,037500868 | 0,023835466 |  |
| 1552972_at  | LOC100507431    | -3,448416261 | -3,472251727 | 0,023835466 |  |
| 1553177_at  | SH2D1B          | -2,063149277 | -2,086984744 | 0,023835466 |  |
| 1553326_at  | RXFP2           | -2,311268652 | -2,335104118 | 0,023835466 |  |
| 1553329_at  | C7orf45         | -2,597496523 | -2,621331989 | 0,023835466 |  |
| 1553449_at  | LINC00304       | -2,01371626  | -2,037551727 | 0,023835466 |  |
| 1553541_at  | LMX1A           | -1,888254346 | -1,912089812 | 0,023835466 |  |
| 1553547_at  | -               | -2,43257096  | -2,456406426 | 0,023835466 |  |
| 1553550_at  | VN1R5           | -2,063149277 | -2,086984744 | 0,023835466 |  |

|              |                    |              |              |             |  |
|--------------|--------------------|--------------|--------------|-------------|--|
| 1553682_at   | FBXL14             | -2,063149277 | -2,086984744 | 0,023835466 |  |
| 1553785_at   | RASGEF1B           | -2,384869671 | -2,408705138 | 0,023835466 |  |
| 1553873_at   | KLHL34             | -2,823166348 | -2,847001814 | 0,023835466 |  |
| 1553878_at   | GOT1L1             | -2,712026959 | -2,735862426 | 0,023835466 |  |
| 1554143_a_at | SUGT1P3            | -2,712026959 | -2,735862426 | 0,023835466 |  |
| 1554334_a_at | DNAJA4             | -2,01371626  | -2,037551727 | 0,023835466 |  |
| 1554506_x_at | NAALAD2            | -3,114791413 | -3,138626879 | 0,023835466 |  |
| 1554540_at   | DNAH14             | -3,07502285  | -3,098858316 | 0,023835466 |  |
| 1554737_at   | FBN2               | -2,01371626  | -2,037551727 | 0,023835466 |  |
| 1554745_at   | RALGPS1            | -2,262747984 | -2,286583451 | 0,023835466 |  |
| 1554785_at   | CCDC82             | -2,712026959 | -2,735862426 | 0,023835466 |  |
| 1554874_at   | MITF               | -2,930741289 | -2,954576755 | 0,023835466 |  |
| 1555034_at   | CLRN1              | -2,930741289 | -2,954576755 | 0,023835466 |  |
| 1555071_at   | TLL1               | -2,756478458 | -2,780313924 | 0,023835466 |  |
| 1555111_at   | C1orf114           | -3,41365796  | -3,437493426 | 0,023835466 |  |
| 1555118_at   | ENTPD3             | -2,597496523 | -2,621331989 | 0,023835466 |  |
| 1555313_a_at | MCF2               | -2,823166348 | -2,847001814 | 0,023835466 |  |
| 1555538_s_at | FAM9B              | -3,114791413 | -3,138626879 | 0,023835466 |  |
| 1555543_a_at | CLCC1              | 1,46610492   | 1,442269454  | 0,023835466 |  |
| 1555585_a_at | FAM71B             | -1,888254346 | -1,912089812 | 0,023835466 |  |
| 1555591_at   | PIF1               | -2,712026959 | -2,735862426 | 0,023835466 |  |
| 1555801_s_at | ZNF385B            | -2,823166348 | -2,847001814 | 0,023835466 |  |
| 1556111_s_at | -                  | -1,888254346 | -1,912089812 | 0,023835466 |  |
| 1556187_at   | ZNF555             | -3,114791413 | -3,138626879 | 0,023835466 |  |
| 1556240_at   | -                  | -2,01371626  | -2,037551727 | 0,023835466 |  |
| 1556404_a_at | ZNRF2P1            | -2,756478458 | -2,780313924 | 0,023835466 |  |
| 1556488_s_at | C3orf15 /// LOC1   | -3,15396682  | -3,177802286 | 0,023835466 |  |
| 1556500_a_at | -                  | -2,712026959 | -2,735862426 | 0,023835466 |  |
| 1556578_a_at | FLJ31945           | -1,399512875 | -1,423348341 | 0,023835466 |  |
| 1556595_at   | -                  | -2,43257096  | -2,456406426 | 0,023835466 |  |
| 1556671_s_at | LOC100505624       | -1,089016378 | -1,112851844 | 0,023835466 |  |
| 1556696_s_at | FLJ42709           | -3,013665402 | -3,037500868 | 0,023835466 |  |
| 1556697_at   | GPRIN3             | -3,15396682  | -3,177802286 | 0,023835466 |  |
| 1556713_at   | -                  | -2,930741289 | -2,954576755 | 0,023835466 |  |
| 1556817_a_at | -                  | -3,15396682  | -3,177802286 | 0,023835466 |  |
| 1556895_a_at | NT5DC2             | -1,937711681 | -1,961547147 | 0,023835466 |  |
| 1556958_at   | -                  | -1,937711681 | -1,961547147 | 0,023835466 |  |
| 1556964_s_at | -                  | -3,013665402 | -3,037500868 | 0,023835466 |  |
| 1556980_at   | -                  | -2,384869671 | -2,408705138 | 0,023835466 |  |
| 1557026_at   | -                  | -1,089016378 | -1,112851844 | 0,023835466 |  |
| 1557488_at   | CBX3P2             | -3,07502285  | -3,098858316 | 0,023835466 |  |
| 1557531_a_at | C10orf55           | -2,597496523 | -2,621331989 | 0,023835466 |  |
| 1557570_a_at | LOC285084          | -1,888254346 | -1,912089812 | 0,023835466 |  |
| 1557776_at   | -                  | -2,384869671 | -2,408705138 | 0,023835466 |  |
| 1557837_a_at | ELMOD2             | -2,712026959 | -2,735862426 | 0,023835466 |  |
| 1557843_at   | -                  | -3,287237186 | -3,311072652 | 0,023835466 |  |
| 1558082_at   | CCDC171            | -2,597496523 | -2,621331989 | 0,023835466 |  |
| 1558708_at   | NRXN1              | -3,114791413 | -3,138626879 | 0,023835466 |  |
| 1558937_s_at | -                  | -1,518072576 | -1,541908042 | 0,023835466 |  |
| 1559036_at   | C4A /// C4B /// LC | -2,384869671 | -2,408705138 | 0,023835466 |  |
| 1559063_at   | -                  | -2,756478458 | -2,780313924 | 0,023835466 |  |
| 1559092_at   | SLC9A5             | -2,311268652 | -2,335104118 | 0,023835466 |  |
| 1559125_at   | -                  | -3,07502285  | -3,098858316 | 0,023835466 |  |
| 1559201_a_at | -                  | -2,187914861 | -2,211750327 | 0,023835466 |  |
| 1559276_at   | LOC728606          | -1,888254346 | -1,912089812 | 0,023835466 |  |
| 1559369_at   | C5orf44            | -2,597496523 | -2,621331989 | 0,023835466 |  |

|              |                 |              |              |             |  |
|--------------|-----------------|--------------|--------------|-------------|--|
| 1559648_at   | LOC100128420    | -2,384869671 | -2,408705138 | 0,023835466 |  |
| 1559706_at   | RGNEF           | -2,712026959 | -2,735862426 | 0,023835466 |  |
| 1559747_at   | SPG11           | -1,888254346 | -1,912089812 | 0,023835466 |  |
| 1559849_at   | ZNF605          | -3,41365796  | -3,437493426 | 0,023835466 |  |
| 1560060_s_at | VPS37C          | 3,571118904  | 3,547283438  | 0,023835466 |  |
| 1560169_at   | -               | -3,15396682  | -3,177802286 | 0,023835466 |  |
| 1560318_at   | ARHGAP29        | -2,930741289 | -2,954576755 | 0,023835466 |  |
| 1560558_at   | INIP            | -2,756478458 | -2,780313924 | 0,023835466 |  |
| 1560566_at   | PCDH20          | -2,756478458 | -2,780313924 | 0,023835466 |  |
| 1560570_a_at | -               | -3,114791413 | -3,138626879 | 0,023835466 |  |
| 1560683_at   | NBEAP1          | -3,013665402 | -3,037500868 | 0,023835466 |  |
| 1560707_at   | LOC283856       | -2,01371626  | -2,037551727 | 0,023835466 |  |
| 1560720_at   | MKNK1           | -2,823166348 | -2,847001814 | 0,023835466 |  |
| 1560734_at   | LOC727924 /// O | -2,823166348 | -2,847001814 | 0,023835466 |  |
| 1560746_at   | NEXN-AS1        | -3,15396682  | -3,177802286 | 0,023835466 |  |
| 1560884_at   | SLC17A1         | -3,07502285  | -3,098858316 | 0,023835466 |  |
| 1560987_a_at | -               | -2,597496523 | -2,621331989 | 0,023835466 |  |
| 1561030_at   | TMC7            | -3,114791413 | -3,138626879 | 0,023835466 |  |
| 1561105_at   | CLDN11          | -2,823166348 | -2,847001814 | 0,023835466 |  |
| 1561230_at   | -               | -3,15396682  | -3,177802286 | 0,023835466 |  |
| 1561331_at   | ERVMER61-1      | -1,089016378 | -1,112851844 | 0,023835466 |  |
| 1561471_at   | LOC441009       | -2,43257096  | -2,456406426 | 0,023835466 |  |
| 1561534_at   | -               | -1,888254346 | -1,912089812 | 0,023835466 |  |
| 1561543_at   | -               | -2,063149277 | -2,086984744 | 0,023835466 |  |
| 1561550_at   | -               | -2,823166348 | -2,847001814 | 0,023835466 |  |
| 1561561_x_at | -               | -1,518072576 | -1,541908042 | 0,023835466 |  |
| 1561635_at   | -               | -2,712026959 | -2,735862426 | 0,023835466 |  |
| 1561813_at   | -               | -2,597496523 | -2,621331989 | 0,023835466 |  |
| 1562110_at   | -               | -3,114791413 | -3,138626879 | 0,023835466 |  |
| 1562223_at   | LOC642426       | -3,41365796  | -3,437493426 | 0,023835466 |  |
| 1562310_at   | -               | -2,930741289 | -2,954576755 | 0,023835466 |  |
| 1562317_at   | FAM186A         | -2,930741289 | -2,954576755 | 0,023835466 |  |
| 1562511_at   | LYST            | -2,063149277 | -2,086984744 | 0,023835466 |  |
| 1562648_at   | CCDC88A         | -2,063149277 | -2,086984744 | 0,023835466 |  |
| 1562722_at   | PRR20A /// PRR2 | -2,187914861 | -2,211750327 | 0,023835466 |  |
| 1562932_at   | -               | -2,756478458 | -2,780313924 | 0,023835466 |  |
| 1562949_at   | -               | -2,756478458 | -2,780313924 | 0,023835466 |  |
| 1562982_at   | -               | -2,01371626  | -2,037551727 | 0,023835466 |  |
| 1563091_at   | -               | -2,823166348 | -2,847001814 | 0,023835466 |  |
| 1563189_at   | -               | -2,384869671 | -2,408705138 | 0,023835466 |  |
| 1563217_at   | -               | -2,930741289 | -2,954576755 | 0,023835466 |  |
| 1563376_at   | -               | -2,756478458 | -2,780313924 | 0,023835466 |  |
| 1563821_at   | LOC170425       | -2,262747984 | -2,286583451 | 0,023835466 |  |
| 1563876_at   | C1orf220        | -3,013665402 | -3,037500868 | 0,023835466 |  |
| 1564121_at   | -               | -2,597496523 | -2,621331989 | 0,023835466 |  |
| 1564139_at   | A2M-AS1         | -1,937711681 | -1,961547147 | 0,023835466 |  |
| 1564287_at   | LINC00410       | -2,01371626  | -2,037551727 | 0,023835466 |  |
| 1564424_at   | -               | -2,01371626  | -2,037551727 | 0,023835466 |  |
| 1564567_at   | -               | -3,013665402 | -3,037500868 | 0,023835466 |  |
| 1564690_at   | -               | -3,013665402 | -3,037500868 | 0,023835466 |  |
| 1565002_at   | -               | -1,888254346 | -1,912089812 | 0,023835466 |  |
| 1565192_at   | -               | -2,43257096  | -2,456406426 | 0,023835466 |  |
| 1565562_at   | -               | -1,888254346 | -1,912089812 | 0,023835466 |  |
| 1565610_at   | -               | -1,888254346 | -1,912089812 | 0,023835466 |  |
| 1565673_at   | FCGR2A          | -2,756478458 | -2,780313924 | 0,023835466 |  |
| 1565685_at   | LOC400940       | -3,114791413 | -3,138626879 | 0,023835466 |  |

|              |           |              |              |             |  |
|--------------|-----------|--------------|--------------|-------------|--|
| 1565755_at   | METAP1D   | -3,114791413 | -3,138626879 | 0,023835466 |  |
| 1565787_at   | -         | -2,43257096  | -2,456406426 | 0,023835466 |  |
| 1565803_at   | -         | -1,196375121 | -1,220210588 | 0,023835466 |  |
| 1566087_at   | -         | -3,07502285  | -3,098858316 | 0,023835466 |  |
| 1566203_at   | -         | -2,823166348 | -2,847001814 | 0,023835466 |  |
| 1566228_at   | -         | -1,196375121 | -1,220210588 | 0,023835466 |  |
| 1566269_at   | RALGAPA1  | -2,712026959 | -2,735862426 | 0,023835466 |  |
| 1566445_at   | -         | -2,930741289 | -2,954576755 | 0,023835466 |  |
| 1566581_at   | -         | -2,384869671 | -2,408705138 | 0,023835466 |  |
| 1566645_at   | -         | -2,756478458 | -2,780313924 | 0,023835466 |  |
| 1566691_at   | -         | -2,43257096  | -2,456406426 | 0,023835466 |  |
| 1566726_at   | -         | -2,262747984 | -2,286583451 | 0,023835466 |  |
| 1566935_at   | TYRO3P    | -2,01371626  | -2,037551727 | 0,023835466 |  |
| 1567576_at   | -         | -3,013665402 | -3,037500868 | 0,023835466 |  |
| 1567705_at   | -         | -2,930741289 | -2,954576755 | 0,023835466 |  |
| 1568673_s_at | EAF2      | -3,114791413 | -3,138626879 | 0,023835466 |  |
| 1568723_at   | ATP9B     | -2,01371626  | -2,037551727 | 0,023835466 |  |
| 1568751_at   | RGS13     | -3,15396682  | -3,177802286 | 0,023835466 |  |
| 1568801_at   | C15orf44  | -2,187914861 | -2,211750327 | 0,023835466 |  |
| 1568932_at   | -         | -2,756478458 | -2,780313924 | 0,023835466 |  |
| 1569061_at   | IQGAP3    | -2,063149277 | -2,086984744 | 0,023835466 |  |
| 1569156_at   | ZNF846    | -2,384869671 | -2,408705138 | 0,023835466 |  |
| 1569311_at   | -         | -2,384869671 | -2,408705138 | 0,023835466 |  |
| 1569342_at   | GLI3      | -2,187914861 | -2,211750327 | 0,023835466 |  |
| 1569417_at   | -         | -1,518072576 | -1,541908042 | 0,023835466 |  |
| 1569552_at   | PTPN18    | -2,930741289 | -2,954576755 | 0,023835466 |  |
| 1569610_at   | IQCH      | -2,823166348 | -2,847001814 | 0,023835466 |  |
| 1569764_at   | -         | -2,43257096  | -2,456406426 | 0,023835466 |  |
| 1569818_at   | -         | -2,823166348 | -2,847001814 | 0,023835466 |  |
| 1569916_at   | -         | -3,114791413 | -3,138626879 | 0,023835466 |  |
| 1570013_at   | -         | -2,311268652 | -2,335104118 | 0,023835466 |  |
| 1570058_at   | SUV420H2  | -2,43257096  | -2,456406426 | 0,023835466 |  |
| 1570093_at   | -         | -2,187914861 | -2,211750327 | 0,023835466 |  |
| 1570271_at   | -         | -2,384869671 | -2,408705138 | 0,023835466 |  |
| 1570320_at   | -         | -2,712026959 | -2,735862426 | 0,023835466 |  |
| 1570361_a_at | -         | -2,311268652 | -2,335104118 | 0,023835466 |  |
| 1570572_at   | LOC729291 | -2,187914861 | -2,211750327 | 0,023835466 |  |
| 200924_s_at  | SLC3A2    | 3,010782559  | 2,986947093  | 0,023835466 |  |
| 200930_s_at  | VCL       | -2,311268652 | -2,335104118 | 0,023835466 |  |
| 200952_s_at  | CCND2     | -2,262747984 | -2,286583451 | 0,023835466 |  |
| 200986_at    | SERPING1  | 2,069451339  | 2,045615873  | 0,023835466 |  |
| 200995_at    | IPO7      | 4,027552846  | 4,003717379  | 0,023835466 |  |
| 201058_s_at  | MYL9      | -1,518072576 | -1,541908042 | 0,023835466 |  |
| 201348_at    | GPX3      | -1,937711681 | -1,961547147 | 0,023835466 |  |
| 201782_s_at  | AIP       | 3,262904562  | 3,239069096  | 0,023835466 |  |
| 201811_x_at  | SH3BP5    | 2,225103271  | 2,201267805  | 0,023835466 |  |
| 201843_s_at  | EFEMP1    | -3,114791413 | -3,138626879 | 0,023835466 |  |
| 201936_s_at  | EIF4G3    | 1,523472489  | 1,499637023  | 0,023835466 |  |
| 202189_x_at  | PTBP1     | 6,069354061  | 6,045518595  | 0,023835466 |  |
| 202281_at    | GAK       | 1,649074067  | 1,6252386    | 0,023835466 |  |
| 202493_x_at  | CSH1      | -2,187914861 | -2,211750327 | 0,023835466 |  |
| 202935_s_at  | SOX9      | -2,823166348 | -2,847001814 | 0,023835466 |  |
| 203188_at    | B3GNT1    | 1,850809354  | 1,826973888  | 0,023835466 |  |
| 203316_s_at  | SNRPE     | 6,704490558  | 6,680655092  | 0,023835466 |  |
| 203717_at    | DPP4      | -2,311268652 | -2,335104118 | 0,023835466 |  |
| 203772_at    | BLVRA     | -2,063149277 | -2,086984744 | 0,023835466 |  |

|             |                   |              |              |             |  |
|-------------|-------------------|--------------|--------------|-------------|--|
| 204030_s_at | IQCJ-SCHIP1 ///   | -2,311268652 | -2,335104118 | 0,023835466 |  |
| 204464_s_at | EDNRA             | -2,712026959 | -2,735862426 | 0,023835466 |  |
| 204584_at   | L1CAM             | -1,937711681 | -1,961547147 | 0,023835466 |  |
| 204714_s_at | F5                | -1,888254346 | -1,912089812 | 0,023835466 |  |
| 204758_s_at | C2CD2L            | -1,888254346 | -1,912089812 | 0,023835466 |  |
| 204913_s_at | SOX11             | -2,823166348 | -2,847001814 | 0,023835466 |  |
| 205174_s_at | QPCT              | -2,930741289 | -2,954576755 | 0,023835466 |  |
| 205234_at   | SLC16A4           | -3,013665402 | -3,037500868 | 0,023835466 |  |
| 205488_at   | GZMA              | -1,937711681 | -1,961547147 | 0,023835466 |  |
| 205556_at   | MSX2              | -2,597496523 | -2,621331989 | 0,023835466 |  |
| 205593_s_at | PDE9A             | -1,089016378 | -1,112851844 | 0,023835466 |  |
| 205999_x_at | CYP3A4            | -1,518072576 | -1,541908042 | 0,023835466 |  |
| 206007_at   | PRG4              | -2,930741289 | -2,954576755 | 0,023835466 |  |
| 206083_at   | BAI1              | -1,399512875 | -1,423348341 | 0,023835466 |  |
| 206168_at   | ZC3H7B            | -1,937711681 | -1,961547147 | 0,023835466 |  |
| 206214_at   | PLA2G7            | -2,756478458 | -2,780313924 | 0,023835466 |  |
| 206311_s_at | PLA2G1B           | -2,311268652 | -2,335104118 | 0,023835466 |  |
| 206330_s_at | SHC3              | -1,196375121 | -1,220210588 | 0,023835466 |  |
| 206356_s_at | GNAL              | -2,01371626  | -2,037551727 | 0,023835466 |  |
| 206382_s_at | BDNF              | -2,063149277 | -2,086984744 | 0,023835466 |  |
| 206577_at   | VIP               | -2,712026959 | -2,735862426 | 0,023835466 |  |
| 206584_at   | LY96              | -2,597496523 | -2,621331989 | 0,023835466 |  |
| 206840_at   | AFM               | -2,384869671 | -2,408705138 | 0,023835466 |  |
| 206964_at   | NAT8B             | -1,518072576 | -1,541908042 | 0,023835466 |  |
| 206984_s_at | RIT2              | -2,823166348 | -2,847001814 | 0,023835466 |  |
| 207210_at   | GABRA3            | -1,888254346 | -1,912089812 | 0,023835466 |  |
| 207218_at   | F9                | -2,712026959 | -2,735862426 | 0,023835466 |  |
| 207250_at   | SIX6              | -1,888254346 | -1,912089812 | 0,023835466 |  |
| 207288_at   | ASMTL-AS1         | -1,196375121 | -1,220210588 | 0,023835466 |  |
| 207294_at   | AGTR2             | -2,311268652 | -2,335104118 | 0,023835466 |  |
| 207333_at   | NMBR              | -1,888254346 | -1,912089812 | 0,023835466 |  |
| 207363_at   | RS1               | -2,712026959 | -2,735862426 | 0,023835466 |  |
| 207404_s_at | HTR1E             | -1,518072576 | -1,541908042 | 0,023835466 |  |
| 207422_at   | ADAM20            | -1,399512875 | -1,423348341 | 0,023835466 |  |
| 207472_at   | RARS2             | -2,712026959 | -2,735862426 | 0,023835466 |  |
| 207500_at   | CASP5             | -1,518072576 | -1,541908042 | 0,023835466 |  |
| 207577_at   | HTR4              | -2,756478458 | -2,780313924 | 0,023835466 |  |
| 207596_at   | -                 | -2,712026959 | -2,735862426 | 0,023835466 |  |
| 207603_at   | SLC4A7            | -3,07502285  | -3,098858316 | 0,023835466 |  |
| 207607_at   | ASCL2             | -2,930741289 | -2,954576755 | 0,023835466 |  |
| 207696_at   | FUT9              | -3,114791413 | -3,138626879 | 0,023835466 |  |
| 207728_at   | ATF7IP            | -2,756478458 | -2,780313924 | 0,023835466 |  |
| 207799_x_at | ARMCX4            | -1,089016378 | -1,112851844 | 0,023835466 |  |
| 207896_s_at | DLEC1             | -1,518072576 | -1,541908042 | 0,023835466 |  |
| 207909_x_at | DAZ1 /// DAZ2 /// | -2,823166348 | -2,847001814 | 0,023835466 |  |
| 208083_s_at | ITGB6             | -2,712026959 | -2,735862426 | 0,023835466 |  |
| 208166_at   | MMP16             | -2,823166348 | -2,847001814 | 0,023835466 |  |
| 208233_at   | PDPN              | -2,43257096  | -2,456406426 | 0,023835466 |  |
| 208338_at   | P2RX3             | -2,262747984 | -2,286583451 | 0,023835466 |  |
| 208348_s_at | CBLB              | -2,597496523 | -2,621331989 | 0,023835466 |  |
| 208448_x_at | IFNA16            | -2,384869671 | -2,408705138 | 0,023835466 |  |
| 208561_at   | ABCC9             | -2,930741289 | -2,954576755 | 0,023835466 |  |
| 208574_at   | SOX14             | -2,262747984 | -2,286583451 | 0,023835466 |  |
| 209082_s_at | COL18A1           | 1,523472489  | 1,499637023  | 0,023835466 |  |
| 209304_x_at | GADD45B           | 1,104397092  | 1,080561626  | 0,023835466 |  |
| 209630_s_at | FBXW2             | 3,234554895  | 3,210719429  | 0,023835466 |  |

|             |                 |              |              |             |  |
|-------------|-----------------|--------------|--------------|-------------|--|
| 209720_s_at | SERPINB3        | -3,15396682  | -3,177802286 | 0,023835466 |  |
| 209819_at   | HABP4           | -2,823166348 | -2,847001814 | 0,023835466 |  |
| 210278_s_at | AP4S1           | 2,082235068  | 2,058399602  | 0,023835466 |  |
| 210459_at   | PSMD4           | -1,196375121 | -1,220210588 | 0,023835466 |  |
| 210558_at   | AKR1C4          | -2,311268652 | -2,335104118 | 0,023835466 |  |
| 211026_s_at | MGLL            | -1,196375121 | -1,220210588 | 0,023835466 |  |
| 211032_at   | COBLL1          | -2,930741289 | -2,954576755 | 0,023835466 |  |
| 211117_x_at | ESR2            | -1,399512875 | -1,423348341 | 0,023835466 |  |
| 211239_s_at | ADAM7           | -3,013665402 | -3,037500868 | 0,023835466 |  |
| 211275_s_at | GYG1            | 3,526916747  | 3,503081281  | 0,023835466 |  |
| 211330_s_at | HFE             | -2,187914861 | -2,211750327 | 0,023835466 |  |
| 211337_s_at | TUBGCP4         | 2,35929703   | 2,335461563  | 0,023835466 |  |
| 211361_s_at | SERPINB13       | -3,15396682  | -3,177802286 | 0,023835466 |  |
| 211440_x_at | CYP3A43         | -2,712026959 | -2,735862426 | 0,023835466 |  |
| 211525_s_at | GP5             | -2,597496523 | -2,621331989 | 0,023835466 |  |
| 211585_at   | NPAT            | -2,311268652 | -2,335104118 | 0,023835466 |  |
| 211782_at   | IDS             | -2,930741289 | -2,954576755 | 0,023835466 |  |
| 212385_at   | TCF4            | 1,104397092  | 1,080561626  | 0,023835466 |  |
| 212479_s_at | RMND5A          | 3,63237684   | 3,608541373  | 0,023835466 |  |
| 212939_at   | COL6A1          | -1,937711681 | -1,961547147 | 0,023835466 |  |
| 213098_at   | RQCD1           | 2,220484971  | 2,196649505  | 0,023835466 |  |
| 213596_at   | CASP4           | -2,063149277 | -2,086984744 | 0,023835466 |  |
| 213912_at   | TBC1D30         | -1,937711681 | -1,961547147 | 0,023835466 |  |
| 214341_at   | AP1G2           | -1,196375121 | -1,220210588 | 0,023835466 |  |
| 214370_at   | S100A8          | -2,43257096  | -2,456406426 | 0,023835466 |  |
| 214410_at   | -               | -2,756478458 | -2,780313924 | 0,023835466 |  |
| 214525_x_at | MLH3            | 1,104397092  | 1,080561626  | 0,023835466 |  |
| 214735_at   | IPCEF1          | -2,384869671 | -2,408705138 | 0,023835466 |  |
| 214918_at   | HNRNPM          | -1,888254346 | -1,912089812 | 0,023835466 |  |
| 214984_at   | LOC100271836 /  | -2,384869671 | -2,408705138 | 0,023835466 |  |
| 215103_at   | CYP2C18         | -2,756478458 | -2,780313924 | 0,023835466 |  |
| 215164_at   | -               | -2,384869671 | -2,408705138 | 0,023835466 |  |
| 215192_at   | PMS2P4          | -2,384869671 | -2,408705138 | 0,023835466 |  |
| 215308_at   | XRCC6           | -1,888254346 | -1,912089812 | 0,023835466 |  |
| 215671_at   | PDE4B           | -3,15396682  | -3,177802286 | 0,023835466 |  |
| 215673_at   | TEF             | -3,013665402 | -3,037500868 | 0,023835466 |  |
| 215817_at   | SERPINB13       | -2,063149277 | -2,086984744 | 0,023835466 |  |
| 216084_at   | FAM205B         | -2,712026959 | -2,735862426 | 0,023835466 |  |
| 216097_at   | -               | -3,013665402 | -3,037500868 | 0,023835466 |  |
| 216098_s_at | HTR7 /// HTR7P1 | -2,01371626  | -2,037551727 | 0,023835466 |  |
| 216131_at   | FRMD4B          | -3,114791413 | -3,138626879 | 0,023835466 |  |
| 216259_at   | LOC100506699    | -2,01371626  | -2,037551727 | 0,023835466 |  |
| 216403_at   | SP3P            | -2,43257096  | -2,456406426 | 0,023835466 |  |
| 216415_at   | DNAH3           | -2,311268652 | -2,335104118 | 0,023835466 |  |
| 216433_s_at | PRDM2           | -2,187914861 | -2,211750327 | 0,023835466 |  |
| 216541_x_at | IGHG1 /// IGHM  | -2,187914861 | -2,211750327 | 0,023835466 |  |
| 216709_at   | -               | -2,43257096  | -2,456406426 | 0,023835466 |  |
| 216748_at   | PYHIN1          | -1,399512875 | -1,423348341 | 0,023835466 |  |
| 216828_at   | MLLT10P1        | -2,384869671 | -2,408705138 | 0,023835466 |  |
| 216871_at   | -               | -1,937711681 | -1,961547147 | 0,023835466 |  |
| 217215_s_at | -               | -2,01371626  | -2,037551727 | 0,023835466 |  |
| 217271_at   | -               | -2,187914861 | -2,211750327 | 0,023835466 |  |
| 217443_at   | -               | -2,712026959 | -2,735862426 | 0,023835466 |  |
| 217639_at   | -               | -2,01371626  | -2,037551727 | 0,023835466 |  |
| 218025_s_at | ECI2            | 5,067068688  | 5,043233221  | 0,023835466 |  |
| 218191_s_at | LMBRD1          | 3,146001821  | 3,122166354  | 0,023835466 |  |



|             |                 |              |              |             |  |
|-------------|-----------------|--------------|--------------|-------------|--|
| 218530_at   | FHOD1           | 2,696781084  | 2,672945617  | 0,023835466 |  |
| 218532_s_at | FAM134B         | -2,597496523 | -2,621331989 | 0,023835466 |  |
| 218612_s_at | TSSC4           | 1,631786706  | 1,60795124   | 0,023835466 |  |
| 218676_s_at | PCTP            | 2,577249059  | 2,553413592  | 0,023835466 |  |
| 218906_x_at | KLC2            | 1,504602299  | 1,480766833  | 0,023835466 |  |
| 219162_s_at | MRPL11          | 3,416167722  | 3,392332256  | 0,023835466 |  |
| 219341_at   | CLN8            | -1,196375121 | -1,220210588 | 0,023835466 |  |
| 219568_x_at | SOX18           | -2,384869671 | -2,408705138 | 0,023835466 |  |
| 219647_at   | POPCDC2         | -2,063149277 | -2,086984744 | 0,023835466 |  |
| 220229_s_at | AP4E1           | -2,187914861 | -2,211750327 | 0,023835466 |  |
| 220575_at   | FAM106A         | -2,384869671 | -2,408705138 | 0,023835466 |  |
| 220625_s_at | ELF5            | -2,187914861 | -2,211750327 | 0,023835466 |  |
| 220640_at   | CSNK1G1         | -1,089016378 | -1,112851844 | 0,023835466 |  |
| 220680_at   | RAVER2          | -2,597496523 | -2,621331989 | 0,023835466 |  |
| 220767_at   | -               | -2,311268652 | -2,335104118 | 0,023835466 |  |
| 220883_at   | PRO2012         | -2,597496523 | -2,621331989 | 0,023835466 |  |
| 220893_at   | LOC57399        | -3,07502285  | -3,098858316 | 0,023835466 |  |
| 221200_at   | ERVK3-2         | -2,187914861 | -2,211750327 | 0,023835466 |  |
| 221425_s_at | ISCA1           | 2,355089531  | 2,331254065  | 0,023835466 |  |
| 221587_s_at | C19orf24        | 2,540666392  | 2,516830926  | 0,023835466 |  |
| 221886_at   | DENND2A         | -3,07502285  | -3,098858316 | 0,023835466 |  |
| 222340_at   | -               | -2,063149277 | -2,086984744 | 0,023835466 |  |
| 222867_s_at | MED31           | 3,784051878  | 3,760216412  | 0,023835466 |  |
| 223606_x_at | KIAA1704        | 3,364775978  | 3,340940512  | 0,023835466 |  |
| 223667_at   | FKBP7           | -2,43257096  | -2,456406426 | 0,023835466 |  |
| 223673_at   | RFX4            | -2,823166348 | -2,847001814 | 0,023835466 |  |
| 224014_at   | ZNF160          | -1,196375121 | -1,220210588 | 0,023835466 |  |
| 224213_at   | -               | -2,823166348 | -2,847001814 | 0,023835466 |  |
| 224227_s_at | BDP1            | -2,384869671 | -2,408705138 | 0,023835466 |  |
| 224278_at   | CYP4F30P        | -3,114791413 | -3,138626879 | 0,023835466 |  |
| 224351_at   | LOC100131508    | -3,15396682  | -3,177802286 | 0,023835466 |  |
| 224402_s_at | FCRL4           | -2,823166348 | -2,847001814 | 0,023835466 |  |
| 224590_at   | XIST            | -3,15396682  | -3,177802286 | 0,023835466 |  |
| 225299_at   | MYO5B           | -2,384869671 | -2,408705138 | 0,023835466 |  |
| 225353_s_at | C1QC            | -2,063149277 | -2,086984744 | 0,023835466 |  |
| 225381_at   | MIR100HG        | -2,311268652 | -2,335104118 | 0,023835466 |  |
| 226122_at   | PLEKHG1         | -2,43257096  | -2,456406426 | 0,023835466 |  |
| 226682_at   | RORA            | -2,262747984 | -2,286583451 | 0,023835466 |  |
| 226940_at   | FAM69B          | -2,01371626  | -2,037551727 | 0,023835466 |  |
| 227441_s_at | ANKS1B          | -2,823166348 | -2,847001814 | 0,023835466 |  |
| 227708_at   | EEF1A1 /// LOC1 | 3,046446467  | 3,022611001  | 0,023835466 |  |
| 227779_at   | -               | -1,518072576 | -1,541908042 | 0,023835466 |  |
| 227955_s_at | EFNA5           | -2,384869671 | -2,408705138 | 0,023835466 |  |
| 228115_at   | FAM59A          | -2,187914861 | -2,211750327 | 0,023835466 |  |
| 228148_at   | ZNF584          | 1,638726528  | 1,614891062  | 0,023835466 |  |
| 228166_at   | ALG2            | -1,196375121 | -1,220210588 | 0,023835466 |  |
| 228237_at   | PAPPA2          | -2,384869671 | -2,408705138 | 0,023835466 |  |
| 228459_at   | FAM84A          | -2,262747984 | -2,286583451 | 0,023835466 |  |
| 228470_at   | RNF187          | -2,187914861 | -2,211750327 | 0,023835466 |  |
| 228608_at   | NALCN           | -2,311268652 | -2,335104118 | 0,023835466 |  |
| 228818_at   | -               | -2,311268652 | -2,335104118 | 0,023835466 |  |
| 229163_at   | -               | -2,063149277 | -2,086984744 | 0,023835466 |  |
| 229327_s_at | -               | -3,15396682  | -3,177802286 | 0,023835466 |  |
| 229339_at   | MYOCD           | -1,518072576 | -1,541908042 | 0,023835466 |  |
| 229478_x_at | BIVM            | -2,712026959 | -2,735862426 | 0,023835466 |  |
| 229620_at   | SEPP1           | -2,823166348 | -2,847001814 | 0,023835466 |  |

|             |              |              |              |             |  |
|-------------|--------------|--------------|--------------|-------------|--|
| 229649_at   | NRXN3        | -2,384869671 | -2,408705138 | 0,023835466 |  |
| 230045_at   | CNTN2        | -2,187914861 | -2,211750327 | 0,023835466 |  |
| 230074_s_at | -            | -1,196375121 | -1,220210588 | 0,023835466 |  |
| 230122_at   | MLLT10       | 1,05337236   | 1,029536893  | 0,023835466 |  |
| 230127_at   | -            | -1,888254346 | -1,912089812 | 0,023835466 |  |
| 230144_at   | GRIA3        | -2,756478458 | -2,780313924 | 0,023835466 |  |
| 230331_at   | METTL21C     | -2,823166348 | -2,847001814 | 0,023835466 |  |
| 230550_at   | MS4A6A       | -2,43257096  | -2,456406426 | 0,023835466 |  |
| 230573_at   | SGK2         | -2,823166348 | -2,847001814 | 0,023835466 |  |
| 230620_at   | USP27X       | 1,742232072  | 1,718396606  | 0,023835466 |  |
| 230644_at   | LRFN5        | -2,01371626  | -2,037551727 | 0,023835466 |  |
| 230746_s_at | -            | -2,756478458 | -2,780313924 | 0,023835466 |  |
| 230914_at   | HNF4A        | -1,196375121 | -1,220210588 | 0,023835466 |  |
| 231473_at   | LOC100506530 | -2,930741289 | -2,954576755 | 0,023835466 |  |
| 231486_x_at | -            | -2,823166348 | -2,847001814 | 0,023835466 |  |
| 231579_s_at | TIMP2        | -2,311268652 | -2,335104118 | 0,023835466 |  |
| 231613_at   | -            | -2,756478458 | -2,780313924 | 0,023835466 |  |
| 231617_at   | TEX33        | -2,384869671 | -2,408705138 | 0,023835466 |  |
| 231662_at   | ARG1         | -2,384869671 | -2,408705138 | 0,023835466 |  |
| 231771_at   | GJB6         | -2,597496523 | -2,621331989 | 0,023835466 |  |
| 231775_at   | TNFRSF10A    | 2,540666392  | 2,516830926  | 0,023835466 |  |
| 231933_at   | 08.03.15     | -1,089016378 | -1,112851844 | 0,023835466 |  |
| 231967_at   | PHF20L1      | 1,46610492   | 1,442269454  | 0,023835466 |  |
| 232039_at   | KIAA1383     | -2,930741289 | -2,954576755 | 0,023835466 |  |
| 232090_at   | DNM3OS       | -2,823166348 | -2,847001814 | 0,023835466 |  |
| 232163_at   | WDR19        | -1,937711681 | -1,961547147 | 0,023835466 |  |
| 232275_s_at | HS6ST3       | -3,114791413 | -3,138626879 | 0,023835466 |  |
| 232314_at   | MTFR1        | -2,712026959 | -2,735862426 | 0,023835466 |  |
| 232738_at   | FAM190A      | -2,187914861 | -2,211750327 | 0,023835466 |  |
| 232743_at   | -            | -2,262747984 | -2,286583451 | 0,023835466 |  |
| 232826_at   | -            | -1,518072576 | -1,541908042 | 0,023835466 |  |
| 232958_at   | -            | -2,187914861 | -2,211750327 | 0,023835466 |  |
| 233016_at   | LOC100506546 | -2,187914861 | -2,211750327 | 0,023835466 |  |
| 233040_at   | PLEKHA5      | -3,15396682  | -3,177802286 | 0,023835466 |  |
| 233046_at   | -            | -3,114791413 | -3,138626879 | 0,023835466 |  |
| 233092_s_at | LOC100271840 | -2,823166348 | -2,847001814 | 0,023835466 |  |
| 233113_at   | ADAMTS9-AS2  | -2,756478458 | -2,780313924 | 0,023835466 |  |
| 233166_at   | DEFB126      | -3,114791413 | -3,138626879 | 0,023835466 |  |
| 233709_at   | -            | -2,43257096  | -2,456406426 | 0,023835466 |  |
| 233798_at   | -            | -2,756478458 | -2,780313924 | 0,023835466 |  |
| 234035_at   | HNRNPM       | -1,399512875 | -1,423348341 | 0,023835466 |  |
| 234165_at   | PTGDR        | -2,597496523 | -2,621331989 | 0,023835466 |  |
| 234350_at   | IGLC1        | -2,187914861 | -2,211750327 | 0,023835466 |  |
| 234392_at   | -            | -2,262747984 | -2,286583451 | 0,023835466 |  |
| 234404_at   | CAND2        | -1,888254346 | -1,912089812 | 0,023835466 |  |
| 234503_at   | -            | -2,712026959 | -2,735862426 | 0,023835466 |  |
| 234548_at   | -            | -2,823166348 | -2,847001814 | 0,023835466 |  |
| 234627_at   | FLJ21408     | -2,01371626  | -2,037551727 | 0,023835466 |  |
| 234849_at   | YME1L1       | -2,712026959 | -2,735862426 | 0,023835466 |  |
| 235030_at   | NXPE3        | -2,063149277 | -2,086984744 | 0,023835466 |  |
| 235236_at   | -            | -2,712026959 | -2,735862426 | 0,023835466 |  |
| 235251_at   | -            | -2,187914861 | -2,211750327 | 0,023835466 |  |
| 235267_at   | MAGI2-AS3    | -1,888254346 | -1,912089812 | 0,023835466 |  |
| 235287_at   | CDK6         | -1,888254346 | -1,912089812 | 0,023835466 |  |
| 235328_at   | PLXNC1       | 1,104397092  | 1,080561626  | 0,023835466 |  |
| 235468_at   | RBFOX3       | -1,937711681 | -1,961547147 | 0,023835466 |  |

|             |                  |              |              |             |  |
|-------------|------------------|--------------|--------------|-------------|--|
| 235633_at   | -                | -1,196375121 | -1,220210588 | 0,023835466 |  |
| 235636_at   | -                | -1,196375121 | -1,220210588 | 0,023835466 |  |
| 235818_at   | VSTM1            | -2,384869671 | -2,408705138 | 0,023835466 |  |
| 235838_at   | NLGN2            | -1,518072576 | -1,541908042 | 0,023835466 |  |
| 235986_at   | -                | -1,888254346 | -1,912089812 | 0,023835466 |  |
| 235999_at   | -                | -2,01371626  | -2,037551727 | 0,023835466 |  |
| 236003_x_at | -                | -1,937711681 | -1,961547147 | 0,023835466 |  |
| 236138_at   | LMBRD2           | -3,07502285  | -3,098858316 | 0,023835466 |  |
| 236141_at   | NBLA00301        | -2,384869671 | -2,408705138 | 0,023835466 |  |
| 236234_at   | PDE1A            | -2,712026959 | -2,735862426 | 0,023835466 |  |
| 236363_at   | LSM3             | -1,399512875 | -1,423348341 | 0,023835466 |  |
| 236466_at   | -                | -2,597496523 | -2,621331989 | 0,023835466 |  |
| 236523_at   | LOC285556        | -2,756478458 | -2,780313924 | 0,023835466 |  |
| 236694_at   | TXLNG2P          | -3,013665402 | -3,037500868 | 0,023835466 |  |
| 237047_at   | LINC00281        | -2,262747984 | -2,286583451 | 0,023835466 |  |
| 237070_at   | TRPM1            | -3,07502285  | -3,098858316 | 0,023835466 |  |
| 237121_at   | -                | -2,063149277 | -2,086984744 | 0,023835466 |  |
| 237130_at   | -                | -1,196375121 | -1,220210588 | 0,023835466 |  |
| 237182_at   | MRPL45P2         | -3,15396682  | -3,177802286 | 0,023835466 |  |
| 237235_at   | -                | -1,518072576 | -1,541908042 | 0,023835466 |  |
| 237339_at   | -                | -1,937711681 | -1,961547147 | 0,023835466 |  |
| 237356_at   | -                | -2,311268652 | -2,335104118 | 0,023835466 |  |
| 237436_at   | -                | -2,063149277 | -2,086984744 | 0,023835466 |  |
| 237462_at   | -                | -2,384869671 | -2,408705138 | 0,023835466 |  |
| 237490_at   | -                | -2,597496523 | -2,621331989 | 0,023835466 |  |
| 237514_at   | LOC100507274     | -2,597496523 | -2,621331989 | 0,023835466 |  |
| 237519_at   | LOC100506880     | -2,43257096  | -2,456406426 | 0,023835466 |  |
| 237533_at   | -                | -1,399512875 | -1,423348341 | 0,023835466 |  |
| 237576_x_at | LOC100506480     | -1,888254346 | -1,912089812 | 0,023835466 |  |
| 237805_at   | -                | -2,384869671 | -2,408705138 | 0,023835466 |  |
| 237819_at   | CREB3L2          | -1,518072576 | -1,541908042 | 0,023835466 |  |
| 237877_at   | -                | -2,756478458 | -2,780313924 | 0,023835466 |  |
| 237917_at   | NBPF8            | -2,597496523 | -2,621331989 | 0,023835466 |  |
| 237937_x_at | -                | -3,15396682  | -3,177802286 | 0,023835466 |  |
| 237950_s_at | -                | -2,262747984 | -2,286583451 | 0,023835466 |  |
| 238098_at   | -                | -1,888254346 | -1,912089812 | 0,023835466 |  |
| 238133_at   | -                | -2,063149277 | -2,086984744 | 0,023835466 |  |
| 238138_at   | CANX             | -1,399512875 | -1,423348341 | 0,023835466 |  |
| 238236_at   | -                | -2,01371626  | -2,037551727 | 0,023835466 |  |
| 238283_at   | LOC151658        | -2,823166348 | -2,847001814 | 0,023835466 |  |
| 238372_s_at | -                | -2,43257096  | -2,456406426 | 0,023835466 |  |
| 238615_at   | ERLIN2           | -2,384869671 | -2,408705138 | 0,023835466 |  |
| 238644_at   | MYSM1            | -1,196375121 | -1,220210588 | 0,023835466 |  |
| 238670_at   | RAD18            | -1,089016378 | -1,112851844 | 0,023835466 |  |
| 238674_at   | -                | -2,063149277 | -2,086984744 | 0,023835466 |  |
| 238731_at   | SETDB2           | -2,063149277 | -2,086984744 | 0,023835466 |  |
| 238805_at   | C11orf52 /// HSP | -1,937711681 | -1,961547147 | 0,023835466 |  |
| 238847_at   | HOXD10           | -2,01371626  | -2,037551727 | 0,023835466 |  |
| 238958_at   | UBE2E1           | -2,756478458 | -2,780313924 | 0,023835466 |  |
| 239298_at   | -                | -2,384869671 | -2,408705138 | 0,023835466 |  |
| 239305_at   | -                | -2,311268652 | -2,335104118 | 0,023835466 |  |
| 239356_at   | DOCK9-AS2        | -2,187914861 | -2,211750327 | 0,023835466 |  |
| 239454_at   | SCARF2           | -2,187914861 | -2,211750327 | 0,023835466 |  |
| 239455_at   | -                | -2,01371626  | -2,037551727 | 0,023835466 |  |
| 239507_at   | LINC00608        | -2,187914861 | -2,211750327 | 0,023835466 |  |
| 239541_at   | LOC100505817     | -2,311268652 | -2,335104118 | 0,023835466 |  |

|             |              |              |              |             |  |
|-------------|--------------|--------------|--------------|-------------|--|
| 239797_at   | -            | -2,01371626  | -2,037551727 | 0,023835466 |  |
| 239878_at   | IPMK         | -2,43257096  | -2,456406426 | 0,023835466 |  |
| 240016_at   | -            | -1,399512875 | -1,423348341 | 0,023835466 |  |
| 240039_at   | PLA2R1       | -1,888254346 | -1,912089812 | 0,023835466 |  |
| 240295_at   | -            | -1,089016378 | -1,112851844 | 0,023835466 |  |
| 240312_at   | -            | -2,384869671 | -2,408705138 | 0,023835466 |  |
| 240414_at   | -            | -1,937711681 | -1,961547147 | 0,023835466 |  |
| 240629_at   | -            | -2,384869671 | -2,408705138 | 0,023835466 |  |
| 240714_at   | -            | -2,756478458 | -2,780313924 | 0,023835466 |  |
| 240718_at   | -            | -2,756478458 | -2,780313924 | 0,023835466 |  |
| 240789_at   | -            | -2,384869671 | -2,408705138 | 0,023835466 |  |
| 240904_at   | -            | -2,712026959 | -2,735862426 | 0,023835466 |  |
| 240994_at   | -            | -2,712026959 | -2,735862426 | 0,023835466 |  |
| 241044_x_at | -            | -2,930741289 | -2,954576755 | 0,023835466 |  |
| 241082_at   | ASNS         | -2,43257096  | -2,456406426 | 0,023835466 |  |
| 241211_at   | -            | -2,01371626  | -2,037551727 | 0,023835466 |  |
| 241226_at   | -            | -1,888254346 | -1,912089812 | 0,023835466 |  |
| 241242_at   | -            | -2,01371626  | -2,037551727 | 0,023835466 |  |
| 241405_at   | LOC400604    | -1,518072576 | -1,541908042 | 0,023835466 |  |
| 241421_at   | -            | -2,597496523 | -2,621331989 | 0,023835466 |  |
| 241647_x_at | -            | -3,287237186 | -3,311072652 | 0,023835466 |  |
| 241685_x_at | -            | -3,013665402 | -3,037500868 | 0,023835466 |  |
| 241711_at   | -            | -1,399512875 | -1,423348341 | 0,023835466 |  |
| 241735_at   | RASSF8       | -1,888254346 | -1,912089812 | 0,023835466 |  |
| 241760_x_at | RORA         | -3,114791413 | -3,138626879 | 0,023835466 |  |
| 241987_x_at | SNX31        | -2,823166348 | -2,847001814 | 0,023835466 |  |
| 241990_at   | RHOV         | -1,089016378 | -1,112851844 | 0,023835466 |  |
| 242001_at   | -            | -2,063149277 | -2,086984744 | 0,023835466 |  |
| 242050_at   | LRRC7        | -1,196375121 | -1,220210588 | 0,023835466 |  |
| 242152_at   | -            | -2,384869671 | -2,408705138 | 0,023835466 |  |
| 242230_at   | ATXN1        | -2,187914861 | -2,211750327 | 0,023835466 |  |
| 242236_at   | -            | -3,013665402 | -3,037500868 | 0,023835466 |  |
| 242319_at   | DGKG         | -2,063149277 | -2,086984744 | 0,023835466 |  |
| 242415_at   | FBRSL1       | -1,399512875 | -1,423348341 | 0,023835466 |  |
| 242453_at   | -            | -2,063149277 | -2,086984744 | 0,023835466 |  |
| 242544_x_at | -            | -3,013665402 | -3,037500868 | 0,023835466 |  |
| 242591_at   | DNAH1        | -2,43257096  | -2,456406426 | 0,023835466 |  |
| 242625_at   | RSAD2        | -2,262747984 | -2,286583451 | 0,023835466 |  |
| 242690_at   | ATP11C       | -2,384869671 | -2,408705138 | 0,023835466 |  |
| 242991_at   | TJP2         | -2,597496523 | -2,621331989 | 0,023835466 |  |
| 243015_at   | CYP3A5       | -3,013665402 | -3,037500868 | 0,023835466 |  |
| 243082_at   | -            | -2,823166348 | -2,847001814 | 0,023835466 |  |
| 243251_at   | -            | -1,518072576 | -1,541908042 | 0,023835466 |  |
| 243329_at   | -            | -1,196375121 | -1,220210588 | 0,023835466 |  |
| 243337_at   | FREM3        | -3,013665402 | -3,037500868 | 0,023835466 |  |
| 243421_at   | -            | -3,114791413 | -3,138626879 | 0,023835466 |  |
| 243441_at   | HOXB-AS4     | -1,089016378 | -1,112851844 | 0,023835466 |  |
| 243689_s_at | FRG1B        | -2,712026959 | -2,735862426 | 0,023835466 |  |
| 243708_at   | TMEM132E     | -2,063149277 | -2,086984744 | 0,023835466 |  |
| 243723_at   | -            | -2,384869671 | -2,408705138 | 0,023835466 |  |
| 243805_at   | CCBE1        | -2,187914861 | -2,211750327 | 0,023835466 |  |
| 243871_at   | LOC100130476 | -2,597496523 | -2,621331989 | 0,023835466 |  |
| 243933_at   | -            | -2,311268652 | -2,335104118 | 0,023835466 |  |
| 243974_at   | -            | -3,07502285  | -3,098858316 | 0,023835466 |  |
| 244117_at   | -            | -2,756478458 | -2,780313924 | 0,023835466 |  |
| 244138_at   | -            | -2,597496523 | -2,621331989 | 0,023835466 |  |

|              |                 |              |              |             |  |
|--------------|-----------------|--------------|--------------|-------------|--|
| 244189_at    | TTC28-AS1       | 2,2992452    | 2,275409734  | 0,023835466 |  |
| 244228_at    | -               | -2,823166348 | -2,847001814 | 0,023835466 |  |
| 244345_at    | CADM1           | -2,187914861 | -2,211750327 | 0,023835466 |  |
| 244407_at    | CYP39A1         | -3,013665402 | -3,037500868 | 0,023835466 |  |
| 244440_at    | -               | -2,262747984 | -2,286583451 | 0,023835466 |  |
| 244451_x_at  | -               | -2,311268652 | -2,335104118 | 0,023835466 |  |
| 244507_at    | -               | -2,712026959 | -2,735862426 | 0,023835466 |  |
| 244596_at    | -               | -1,888254346 | -1,912089812 | 0,023835466 |  |
| 244651_at    | -               | -2,262747984 | -2,286583451 | 0,023835466 |  |
| 244664_at    | -               | 1,774096855  | 1,750261389  | 0,023835466 |  |
| 244723_at    | ACSM2A          | -3,013665402 | -3,037500868 | 0,023835466 |  |
| 244728_at    | -               | -1,196375121 | -1,220210588 | 0,023835466 |  |
| 244781_x_at  | -               | -2,262747984 | -2,286583451 | 0,023835466 |  |
| 48531_at     | TNIP2           | 2,279399592  | 2,255564126  | 0,023835466 |  |
| 58916_at     | KCTD14 /// NDU1 | -2,222460895 | -2,246296361 | 0,023835466 |  |
| 1570382_at   | -               | -0,234278768 | -0,258114234 | 0,023835466 |  |
| 202912_at    | ADM             | 0,518867317  | 0,495031851  | 0,023835466 |  |
| 204896_s_at  | PTGER4          | -0,234278768 | -0,258114234 | 0,023835466 |  |
| 208435_s_at  | AQP6            | -0,299034815 | -0,322870281 | 0,023835466 |  |
| 210307_s_at  | KLHL25          | 0,984222186  | 0,960386719  | 0,023835466 |  |
| 217207_s_at  | BTNL3           | 0,715481152  | 0,691645685  | 0,023835466 |  |
| 225168_at    | FRMD4A          | 0,518867317  | 0,495031851  | 0,023835466 |  |
| 226403_at    | TMC4            | -0,299034815 | -0,322870281 | 0,023835466 |  |
| 227423_at    | LRRC28          | 0,984222186  | 0,960386719  | 0,023835466 |  |
| 229161_at    | -               | -0,234278768 | -0,258114234 | 0,023835466 |  |
| 236094_at    | TCF7L2          | -0,234278768 | -0,258114234 | 0,023835466 |  |
| 239424_at    | -               | -0,299034815 | -0,322870281 | 0,023835466 |  |
| 243061_at    | C14orf23        | -0,234278768 | -0,258114234 | 0,023835466 |  |
| 244160_at    | -               | -0,299034815 | -0,322870281 | 0,023835466 |  |
| 1553246_a_at | SGK196          | -0,136301282 | -0,160136748 | 0,023835466 |  |
| 1562789_at   | ZNF229          | -0,136301282 | -0,160136748 | 0,023835466 |  |
| 1563800_at   | LOC100506870 /  | -0,136301282 | -0,160136748 | 0,023835466 |  |
| 200907_s_at  | PALLD           | -0,196756757 | -0,220592223 | 0,023835466 |  |
| 204685_s_at  | ATP2B2          | -0,136301282 | -0,160136748 | 0,023835466 |  |
| 215217_at    | IGKC            | -0,136301282 | -0,160136748 | 0,023835466 |  |
| 216265_x_at  | MYH7            | -0,196756757 | -0,220592223 | 0,023835466 |  |
| 217253_at    | SH3BP2          | -0,196756757 | -0,220592223 | 0,023835466 |  |
| 225615_at    | IFFO2           | -0,136301282 | -0,160136748 | 0,023835466 |  |
| 228419_at    | METRN           | -0,196756757 | -0,220592223 | 0,023835466 |  |
| 229135_at    | FASTKD2         | -0,196756757 | -0,220592223 | 0,023835466 |  |
| 229699_at    | LOC100129550    | -0,136301282 | -0,160136748 | 0,023835466 |  |
| 232370_at    | LOC254057       | -0,136301282 | -0,160136748 | 0,023835466 |  |
| 235792_x_at  | PIK3C2A         | -0,136301282 | -0,160136748 | 0,023835466 |  |
| 1559789_a_at | ZNF781          | 0,503742507  | 0,479907041  | 0,023835466 |  |
| 1561270_at   | -               | -0,325749314 | -0,34958478  | 0,023835466 |  |
| 1566257_at   | GPR180          | 0,44160593   | 0,417770464  | 0,023835466 |  |
| 202439_s_at  | IDS             | -0,325749314 | -0,34958478  | 0,023835466 |  |
| 203058_s_at  | PAPSS2          | -0,325749314 | -0,34958478  | 0,023835466 |  |
| 203894_at    | TUBG2           | -0,325749314 | -0,34958478  | 0,023835466 |  |
| 219772_s_at  | SMPX            | -0,325749314 | -0,34958478  | 0,023835466 |  |
| 227499_at    | FZD3            | 0,44160593   | 0,417770464  | 0,023835466 |  |
| 231912_s_at  | TECPR1          | 0,44160593   | 0,417770464  | 0,023835466 |  |
| 232965_at    | LOC400684       | -0,325749314 | -0,34958478  | 0,023835466 |  |
| 235131_at    | RHOJ            | -0,325749314 | -0,34958478  | 0,023835466 |  |
| 242012_at    | -               | -0,325749314 | -0,34958478  | 0,023835466 |  |
| 1552395_at   | TSSK3           | 1,560488174  | 1,536652708  | 0,023835466 |  |

|              |              |              |              |             |  |
|--------------|--------------|--------------|--------------|-------------|--|
| 1552473_at   | GAMT         | 1,799091453  | 1,775255987  | 0,023835466 |  |
| 1552485_at   | LACTB        | 1,716223609  | 1,692388143  | 0,023835466 |  |
| 1553023_a_at | NOX5         | -1,308181863 | -1,332017329 | 0,023835466 |  |
| 1553031_at   | GPR115       | -1,308181863 | -1,332017329 | 0,023835466 |  |
| 1553512_at   | HOXC12       | -1,470833215 | -1,494668682 | 0,023835466 |  |
| 1553881_at   | MGC16142     | -1,763254337 | -1,787089803 | 0,023835466 |  |
| 1554276_at   | SART3        | -1,838812296 | -1,862647763 | 0,023835466 |  |
| 1554411_at   | CTNNB1       | 1,238353345  | 1,214517879  | 0,023835466 |  |
| 1554584_at   | LRRC48       | -0,706943342 | -0,730778808 | 0,023835466 |  |
| 1554666_at   | LOC100130950 | -0,79540287  | -0,819238336 | 0,023835466 |  |
| 1555096_at   | C4orf37      | -0,79540287  | -0,819238336 | 0,023835466 |  |
| 1555437_at   | EARS2        | -1,353583928 | -1,377419394 | 0,023835466 |  |
| 1555620_a_at | PTGIR        | 1,683039483  | 1,659204017  | 0,023835466 |  |
| 1556063_s_at | RPP30        | 0,747935635  | 0,724100169  | 0,023835466 |  |
| 1556338_at   | -            | -1,026571149 | -1,050406615 | 0,023835466 |  |
| 1556344_at   | LOC150051    | -1,353583928 | -1,377419394 | 0,023835466 |  |
| 1556608_a_at | EHD4         | -1,470833215 | -1,494668682 | 0,023835466 |  |
| 1556676_a_at | -            | -0,706943342 | -0,730778808 | 0,023835466 |  |
| 1557162_at   | C16orf92     | -1,591296941 | -1,615132408 | 0,023835466 |  |
| 1557287_at   | -            | -1,838812296 | -1,862647763 | 0,023835466 |  |
| 1557405_at   | LOC100130111 | -1,71423189  | -1,738067356 | 0,023835466 |  |
| 1557466_at   | FLJ31104     | -1,639579028 | -1,663414495 | 0,023835466 |  |
| 1557575_at   | STBD1        | -1,353583928 | -1,377419394 | 0,023835466 |  |
| 1557693_at   | LOC100507299 | -1,240169874 | -1,264005341 | 0,023835466 |  |
| 1558447_at   | -            | -1,71423189  | -1,738067356 | 0,023835466 |  |
| 1558512_at   | -            | -1,131062212 | -1,154897679 | 0,023835466 |  |
| 1558739_at   | -            | -1,470833215 | -1,494668682 | 0,023835466 |  |
| 1558758_s_at | -            | -0,622910612 | -0,646746079 | 0,023835466 |  |
| 1559384_at   | -            | -1,639579028 | -1,663414495 | 0,023835466 |  |
| 1559891_at   | HMGA2        | -1,240169874 | -1,264005341 | 0,023835466 |  |
| 1559948_at   | -            | -1,838812296 | -1,862647763 | 0,023835466 |  |
| 1560316_s_at | GLCC1        | -0,622910612 | -0,646746079 | 0,023835466 |  |
| 1560747_at   | -            | -1,838812296 | -1,862647763 | 0,023835466 |  |
| 1561060_at   | LOC100506439 | -0,706943342 | -0,730778808 | 0,023835466 |  |
| 1561273_at   | -            | -1,240169874 | -1,264005341 | 0,023835466 |  |
| 1561500_at   | CTU2         | -1,131062212 | -1,154897679 | 0,023835466 |  |
| 1562005_at   | RIN3         | -1,591296941 | -1,615132408 | 0,023835466 |  |
| 1562158_at   | -            | -1,591296941 | -1,615132408 | 0,023835466 |  |
| 1563036_at   | -            | -1,71423189  | -1,738067356 | 0,023835466 |  |
| 1563691_at   | LOC285300    | -1,71423189  | -1,738067356 | 0,023835466 |  |
| 1564352_at   | CECR3        | -1,639579028 | -1,663414495 | 0,023835466 |  |
| 1564426_x_at | LOC729732    | -1,763254337 | -1,787089803 | 0,023835466 |  |
| 1565620_at   | AGAP4        | -1,240169874 | -1,264005341 | 0,023835466 |  |
| 1565738_at   | SCTR         | -1,639579028 | -1,663414495 | 0,023835466 |  |
| 1565751_at   | FGD2         | -0,79540287  | -0,819238336 | 0,023835466 |  |
| 1566235_at   | DGCR12       | -1,470833215 | -1,494668682 | 0,023835466 |  |
| 1566776_at   | DNAH1        | -1,131062212 | -1,154897679 | 0,023835466 |  |
| 1566986_at   | -            | -1,470833215 | -1,494668682 | 0,023835466 |  |
| 1566999_at   | -            | -1,308181863 | -1,332017329 | 0,023835466 |  |
| 1567559_s_at | TREML4       | -1,763254337 | -1,787089803 | 0,023835466 |  |
| 1568730_at   | -            | -1,240169874 | -1,264005341 | 0,023835466 |  |
| 1568889_at   | FANCD2       | -1,639579028 | -1,663414495 | 0,023835466 |  |
| 1569182_at   | -            | -1,838812296 | -1,862647763 | 0,023835466 |  |
| 1569207_s_at | TCP11L2      | -1,71423189  | -1,738067356 | 0,023835466 |  |
| 1569237_at   | -            | -1,639579028 | -1,663414495 | 0,023835466 |  |
| 1569629_x_at | LOC389906    | 1,709647566  | 1,685812099  | 0,023835466 |  |

|             |                  |              |              |             |  |
|-------------|------------------|--------------|--------------|-------------|--|
| 1569668_at  | -                | -1,308181863 | -1,332017329 | 0,023835466 |  |
| 1569791_at  | STK4             | -1,763254337 | -1,787089803 | 0,023835466 |  |
| 1569991_at  | KY               | -1,026571149 | -1,050406615 | 0,023835466 |  |
| 1570040_at  | -                | -1,308181863 | -1,332017329 | 0,023835466 |  |
| 1570329_at  | -                | -1,71423189  | -1,738067356 | 0,023835466 |  |
| 201354_s_at | BAZ2A            | 1,215326747  | 1,191491281  | 0,023835466 |  |
| 201884_at   | CEACAM5          | -1,470833215 | -1,494668682 | 0,023835466 |  |
| 202685_s_at | AXL              | 1,261018186  | 1,23718272   | 0,023835466 |  |
| 203691_at   | PI3              | -1,026571149 | -1,050406615 | 0,023835466 |  |
| 204097_s_at | RBMX2            | 1,549482847  | 1,525647381  | 0,023835466 |  |
| 204509_at   | CA12             | -1,470833215 | -1,494668682 | 0,023835466 |  |
| 204542_at   | ST6GALNAC2       | -1,240169874 | -1,264005341 | 0,023835466 |  |
| 204799_at   | ZBED4            | 1,542099044  | 1,518263577  | 0,023835466 |  |
| 204875_s_at | GMDS             | 1,296557217  | 1,272721751  | 0,023835466 |  |
| 205098_at   | CCR1             | -1,470833215 | -1,494668682 | 0,023835466 |  |
| 205287_s_at | TFAP2C           | -1,763254337 | -1,787089803 | 0,023835466 |  |
| 205454_at   | HPCA             | -1,308181863 | -1,332017329 | 0,023835466 |  |
| 205651_x_at | RAPGEF4          | -1,353583928 | -1,377419394 | 0,023835466 |  |
| 205921_s_at | SLC6A6           | -1,763254337 | -1,787089803 | 0,023835466 |  |
| 206316_s_at | KNTC1            | 1,40228911   | 1,378453643  | 0,023835466 |  |
| 206601_s_at | HOXD3            | -1,838812296 | -1,862647763 | 0,023835466 |  |
| 206750_at   | MAFK             | -1,026571149 | -1,050406615 | 0,023835466 |  |
| 206866_at   | CDH4             | -1,131062212 | -1,154897679 | 0,023835466 |  |
| 206887_at   | CCBP2            | -0,622910612 | -0,646746079 | 0,023835466 |  |
| 207077_at   | CELA2B           | -1,470833215 | -1,494668682 | 0,023835466 |  |
| 207152_at   | NTRK2            | -1,308181863 | -1,332017329 | 0,023835466 |  |
| 207304_at   | ZNF45            | 1,820612054  | 1,796776588  | 0,023835466 |  |
| 207505_at   | PRKG2            | -1,763254337 | -1,787089803 | 0,023835466 |  |
| 207723_s_at | KLRC3            | -1,838812296 | -1,862647763 | 0,023835466 |  |
| 207995_s_at | CLEC4M           | -0,706943342 | -0,730778808 | 0,023835466 |  |
| 208004_at   | PROL1            | -1,71423189  | -1,738067356 | 0,023835466 |  |
| 208594_x_at | LILRA6           | -1,71423189  | -1,738067356 | 0,023835466 |  |
| 209521_s_at | AMOT             | -1,591296941 | -1,615132408 | 0,023835466 |  |
| 210304_at   | PDE6B            | -1,026571149 | -1,050406615 | 0,023835466 |  |
| 210652_s_at | TTC39A           | -1,639579028 | -1,663414495 | 0,023835466 |  |
| 210674_s_at | PCDHA1 /// PCD   | -1,240169874 | -1,264005341 | 0,023835466 |  |
| 210998_s_at | HGF              | -1,763254337 | -1,787089803 | 0,023835466 |  |
| 211249_at   | GPR68            | -1,470833215 | -1,494668682 | 0,023835466 |  |
| 211650_x_at | IGH@ /// IGHA1 / | -1,353583928 | -1,377419394 | 0,023835466 |  |
| 211836_s_at | MOG              | -0,706943342 | -0,730778808 | 0,023835466 |  |
| 211915_s_at | TUBB7P           | -1,591296941 | -1,615132408 | 0,023835466 |  |
| 212444_at   | GPRC5A           | -0,79540287  | -0,819238336 | 0,023835466 |  |
| 213421_x_at | PRSS3            | -0,622910612 | -0,646746079 | 0,023835466 |  |
| 213821_s_at | IDS              | -1,353583928 | -1,377419394 | 0,023835466 |  |
| 213954_at   | FAM169A          | -1,353583928 | -1,377419394 | 0,023835466 |  |
| 214357_at   | C1orf105         | -1,639579028 | -1,663414495 | 0,023835466 |  |
| 214492_at   | SGCD             | -1,470833215 | -1,494668682 | 0,023835466 |  |
| 214555_at   | SSTR5            | -1,591296941 | -1,615132408 | 0,023835466 |  |
| 214792_x_at | VAMP2            | -1,71423189  | -1,738067356 | 0,023835466 |  |
| 214817_at   | UNC13A           | -0,622910612 | -0,646746079 | 0,023835466 |  |
| 215024_at   | CCZ1B            | -1,639579028 | -1,663414495 | 0,023835466 |  |
| 215035_at   | IGLV6-57         | -1,639579028 | -1,663414495 | 0,023835466 |  |
| 215252_at   | -                | -1,470833215 | -1,494668682 | 0,023835466 |  |
| 215576_at   | -                | -1,353583928 | -1,377419394 | 0,023835466 |  |
| 215610_at   | ALG1L2           | -1,026571149 | -1,050406615 | 0,023835466 |  |
| 215873_x_at | ABCC10           | 1,689737652  | 1,665902186  | 0,023835466 |  |

|             |                |              |              |             |  |
|-------------|----------------|--------------|--------------|-------------|--|
| 216010_x_at | FUT3           | -1,591296941 | -1,615132408 | 0,023835466 |  |
| 216192_at   | FABP7          | -1,838812296 | -1,862647763 | 0,023835466 |  |
| 216230_x_at | SMPD1          | -1,308181863 | -1,332017329 | 0,023835466 |  |
| 216418_at   | -              | -1,71423189  | -1,738067356 | 0,023835466 |  |
| 216428_x_at | KIR3DX1        | -1,71423189  | -1,738067356 | 0,023835466 |  |
| 216436_at   | PIK3R4         | -1,308181863 | -1,332017329 | 0,023835466 |  |
| 216489_at   | TRPM3          | -1,308181863 | -1,332017329 | 0,023835466 |  |
| 216564_at   | -              | -1,470833215 | -1,494668682 | 0,023835466 |  |
| 216576_x_at | IGK@ /// IGKC  | -1,639579028 | -1,663414495 | 0,023835466 |  |
| 216763_at   | -              | -1,470833215 | -1,494668682 | 0,023835466 |  |
| 216768_x_at | TTC38          | -1,131062212 | -1,154897679 | 0,023835466 |  |
| 217049_x_at | PCDH11X /// PC | -1,639579028 | -1,663414495 | 0,023835466 |  |
| 217157_x_at | IGK@ /// IGKC  | -1,71423189  | -1,738067356 | 0,023835466 |  |
| 217464_at   | -              | -1,308181863 | -1,332017329 | 0,023835466 |  |
| 217563_at   | CLOCK          | -1,71423189  | -1,738067356 | 0,023835466 |  |
| 218417_s_at | SLC48A1        | 1,177702228  | 1,153866761  | 0,023835466 |  |
| 218632_at   | HECTD3         | 1,089278259  | 1,065442793  | 0,023835466 |  |
| 219796_s_at | CDHR5          | -1,131062212 | -1,154897679 | 0,023835466 |  |
| 219994_at   | APBB1IP        | -1,71423189  | -1,738067356 | 0,023835466 |  |
| 220002_at   | KIF26B         | -1,591296941 | -1,615132408 | 0,023835466 |  |
| 220012_at   | ERO1LB         | -1,591296941 | -1,615132408 | 0,023835466 |  |
| 220049_s_at | PDCD1LG2       | -1,838812296 | -1,862647763 | 0,023835466 |  |
| 221325_at   | KCNK13         | -1,763254337 | -1,787089803 | 0,023835466 |  |
| 221414_s_at | DEFB126        | -1,763254337 | -1,787089803 | 0,023835466 |  |
| 221455_s_at | WNT3           | -1,71423189  | -1,738067356 | 0,023835466 |  |
| 221962_s_at | UBE2H          | 1,982112682  | 1,958277216  | 0,023835466 |  |
| 222059_at   | ZNF335         | -1,240169874 | -1,264005341 | 0,023835466 |  |
| 222300_at   | -              | -1,71423189  | -1,738067356 | 0,023835466 |  |
| 222454_s_at | PARVA          | -1,639579028 | -1,663414495 | 0,023835466 |  |
| 222813_at   | ZNF668         | -1,71423189  | -1,738067356 | 0,023835466 |  |
| 223045_at   | EGLN1          | -1,763254337 | -1,787089803 | 0,023835466 |  |
| 223121_s_at | SFRP2          | -1,639579028 | -1,663414495 | 0,023835466 |  |
| 223453_s_at | ATL3           | -1,71423189  | -1,738067356 | 0,023835466 |  |
| 223943_s_at | -              | -1,026571149 | -1,050406615 | 0,023835466 |  |
| 226271_at   | GDAP1          | 1,215326747  | 1,191491281  | 0,023835466 |  |
| 226498_at   | FLT1           | -1,240169874 | -1,264005341 | 0,023835466 |  |
| 226945_at   | RHBDD1         | 1,58584542   | 1,562009954  | 0,023835466 |  |
| 227076_at   | NCAPH2         | 1,261018186  | 1,23718272   | 0,023835466 |  |
| 227123_at   | RAB3B          | -1,353583928 | -1,377419394 | 0,023835466 |  |
| 227571_at   | -              | -0,622910612 | -0,646746079 | 0,023835466 |  |
| 227799_at   | MYO1G          | -1,131062212 | -1,154897679 | 0,023835466 |  |
| 228136_s_at | C17orf70       | -0,706943342 | -0,730778808 | 0,023835466 |  |
| 228215_at   | LOC100505933   | -1,591296941 | -1,615132408 | 0,023835466 |  |
| 228233_at   | FREM1          | -1,591296941 | -1,615132408 | 0,023835466 |  |
| 228345_at   | CHIC1          | 0,747935635  | 0,724100169  | 0,023835466 |  |
| 228603_at   | ACTR3          | 1,940595304  | 1,916759838  | 0,023835466 |  |
| 228784_at   | ST3GAL2        | -1,131062212 | -1,154897679 | 0,023835466 |  |
| 228878_s_at | CFC1B          | -1,591296941 | -1,615132408 | 0,023835466 |  |
| 229118_at   | PRRG3          | -1,838812296 | -1,862647763 | 0,023835466 |  |
| 229271_x_at | COL11A1        | -1,591296941 | -1,615132408 | 0,023835466 |  |
| 229678_at   | LOC728431      | -1,240169874 | -1,264005341 | 0,023835466 |  |
| 229772_at   | DEFB123        | -0,622910612 | -0,646746079 | 0,023835466 |  |
| 230073_at   | LOC100131564   | -1,131062212 | -1,154897679 | 0,023835466 |  |
| 230432_at   | LOC100422737   | -1,591296941 | -1,615132408 | 0,023835466 |  |
| 230595_at   | LOC100653336 / | -0,622910612 | -0,646746079 | 0,023835466 |  |
| 230997_at   | TTC21A         | -1,131062212 | -1,154897679 | 0,023835466 |  |



|             |                 |              |              |             |  |
|-------------|-----------------|--------------|--------------|-------------|--|
| 231013_at   | -               | -1,71423189  | -1,738067356 | 0,023835466 |  |
| 231540_at   | LOC100130691    | -1,639579028 | -1,663414495 | 0,023835466 |  |
| 231742_at   | CRX             | -1,591296941 | -1,615132408 | 0,023835466 |  |
| 231745_at   | GPR55           | -1,131062212 | -1,154897679 | 0,023835466 |  |
| 231994_at   | CHDH            | -1,353583928 | -1,377419394 | 0,023835466 |  |
| 232158_x_at | NIPAL1          | -1,470833215 | -1,494668682 | 0,023835466 |  |
| 232301_at   | UBE3B           | -1,71423189  | -1,738067356 | 0,023835466 |  |
| 232408_at   | ZFYVE28         | -0,706943342 | -0,730778808 | 0,023835466 |  |
| 232434_at   | DIRC3           | -1,353583928 | -1,377419394 | 0,023835466 |  |
| 232576_at   | -               | -1,591296941 | -1,615132408 | 0,023835466 |  |
| 232830_at   | RNF32           | -1,639579028 | -1,663414495 | 0,023835466 |  |
| 232845_at   | CDH23 /// LOC10 | -0,706943342 | -0,730778808 | 0,023835466 |  |
| 232894_at   | -               | -0,79540287  | -0,819238336 | 0,023835466 |  |
| 232979_at   | MIR10A          | -1,763254337 | -1,787089803 | 0,023835466 |  |
| 233043_at   | LOC221814       | -1,763254337 | -1,787089803 | 0,023835466 |  |
| 233067_at   | PRDM11          | -1,591296941 | -1,615132408 | 0,023835466 |  |
| 233072_at   | NTNG2           | -1,353583928 | -1,377419394 | 0,023835466 |  |
| 233179_x_at | SIRT6           | 1,58584542   | 1,562009954  | 0,023835466 |  |
| 233229_at   | SCFD1           | -1,591296941 | -1,615132408 | 0,023835466 |  |
| 233393_at   | -               | -1,639579028 | -1,663414495 | 0,023835466 |  |
| 233437_at   | GABRA4          | -1,639579028 | -1,663414495 | 0,023835466 |  |
| 233453_at   | -               | -1,71423189  | -1,738067356 | 0,023835466 |  |
| 233593_at   | -               | -1,026571149 | -1,050406615 | 0,023835466 |  |
| 233883_at   | SNX24           | -1,308181863 | -1,332017329 | 0,023835466 |  |
| 233909_at   | -               | -1,470833215 | -1,494668682 | 0,023835466 |  |
| 233967_at   | -               | -1,353583928 | -1,377419394 | 0,023835466 |  |
| 234010_at   | -               | -1,131062212 | -1,154897679 | 0,023835466 |  |
| 234044_at   | -               | -0,79540287  | -0,819238336 | 0,023835466 |  |
| 234574_at   | -               | -1,026571149 | -1,050406615 | 0,023835466 |  |
| 234640_x_at | -               | -1,591296941 | -1,615132408 | 0,023835466 |  |
| 234869_at   | -               | -1,308181863 | -1,332017329 | 0,023835466 |  |
| 234900_at   | -               | -1,838812296 | -1,862647763 | 0,023835466 |  |
| 234910_at   | RASAL2          | -0,706943342 | -0,730778808 | 0,023835466 |  |
| 235053_at   | -               | -0,622910612 | -0,646746079 | 0,023835466 |  |
| 235152_at   | -               | -1,639579028 | -1,663414495 | 0,023835466 |  |
| 235195_at   | FBXW2           | -1,639579028 | -1,663414495 | 0,023835466 |  |
| 235255_at   | ATP6V0A2        | 1,177702228  | 1,153866761  | 0,023835466 |  |
| 235268_at   | -               | -1,838812296 | -1,862647763 | 0,023835466 |  |
| 235364_at   | TSC22D3         | -1,131062212 | -1,154897679 | 0,023835466 |  |
| 235612_at   | -               | 1,549482847  | 1,525647381  | 0,023835466 |  |
| 235639_at   | CDH19           | -1,763254337 | -1,787089803 | 0,023835466 |  |
| 235654_at   | TMEM218         | -1,308181863 | -1,332017329 | 0,023835466 |  |
| 235671_at   | -               | -1,308181863 | -1,332017329 | 0,023835466 |  |
| 235842_at   | -               | -1,763254337 | -1,787089803 | 0,023835466 |  |
| 235853_at   | C3orf58         | -0,79540287  | -0,819238336 | 0,023835466 |  |
| 235863_at   | JSRP1           | -1,639579028 | -1,663414495 | 0,023835466 |  |
| 235904_at   | UGT3A1          | -1,763254337 | -1,787089803 | 0,023835466 |  |
| 235982_at   | FCRL1           | -1,838812296 | -1,862647763 | 0,023835466 |  |
| 236086_at   | -               | -1,308181863 | -1,332017329 | 0,023835466 |  |
| 236310_at   | ZNF37BP         | -1,353583928 | -1,377419394 | 0,023835466 |  |
| 236579_at   | NKX2-1-AS1      | -1,763254337 | -1,787089803 | 0,023835466 |  |
| 236720_at   | -               | -1,838812296 | -1,862647763 | 0,023835466 |  |
| 236790_s_at | -               | -1,026571149 | -1,050406615 | 0,023835466 |  |
| 236840_at   | C12orf56        | -1,71423189  | -1,738067356 | 0,023835466 |  |
| 237005_at   | LOC442075       | 1,360921491  | 1,337086025  | 0,023835466 |  |
| 237008_at   | POU3F3          | -1,131062212 | -1,154897679 | 0,023835466 |  |

|              |                 |              |              |             |  |
|--------------|-----------------|--------------|--------------|-------------|--|
| 237113_at    | -               | -1,763254337 | -1,787089803 | 0,023835466 |  |
| 237191_x_at  | -               | -1,838812296 | -1,862647763 | 0,023835466 |  |
| 237848_at    | -               | -1,838812296 | -1,862647763 | 0,023835466 |  |
| 237915_at    | AMPD3 /// LOC10 | -0,622910612 | -0,646746079 | 0,023835466 |  |
| 237985_at    | -               | -1,71423189  | -1,738067356 | 0,023835466 |  |
| 238210_at    | -               | -1,838812296 | -1,862647763 | 0,023835466 |  |
| 238212_at    | -               | -1,470833215 | -1,494668682 | 0,023835466 |  |
| 238244_at    | LINC00535       | -1,763254337 | -1,787089803 | 0,023835466 |  |
| 238293_at    | -               | -1,763254337 | -1,787089803 | 0,023835466 |  |
| 238322_s_at  | TEAD2           | -0,622910612 | -0,646746079 | 0,023835466 |  |
| 238936_at    | TMEM178B        | -0,706943342 | -0,730778808 | 0,023835466 |  |
| 238961_s_at  | FNDC3A          | -1,353583928 | -1,377419394 | 0,023835466 |  |
| 239022_at    | -               | -0,622910612 | -0,646746079 | 0,023835466 |  |
| 239030_at    | -               | -1,470833215 | -1,494668682 | 0,023835466 |  |
| 239156_at    | -               | -1,131062212 | -1,154897679 | 0,023835466 |  |
| 239192_at    | PARD3B          | -1,763254337 | -1,787089803 | 0,023835466 |  |
| 239306_at    | -               | -1,470833215 | -1,494668682 | 0,023835466 |  |
| 239656_at    | LHFPL3-AS2      | -1,838812296 | -1,862647763 | 0,023835466 |  |
| 239686_at    | -               | -1,026571149 | -1,050406615 | 0,023835466 |  |
| 240033_at    | PLG             | -0,622910612 | -0,646746079 | 0,023835466 |  |
| 240228_at    | CSMD3           | -1,470833215 | -1,494668682 | 0,023835466 |  |
| 240273_at    | -               | -0,622910612 | -0,646746079 | 0,023835466 |  |
| 240346_at    | -               | -1,591296941 | -1,615132408 | 0,023835466 |  |
| 240390_at    | GALNT5          | 1,296557217  | 1,272721751  | 0,023835466 |  |
| 240653_at    | -               | -1,639579028 | -1,663414495 | 0,023835466 |  |
| 240661_at    | LOC100506459    | -1,026571149 | -1,050406615 | 0,023835466 |  |
| 240833_at    | -               | -1,353583928 | -1,377419394 | 0,023835466 |  |
| 241013_at    | FAM124A         | -0,79540287  | -0,819238336 | 0,023835466 |  |
| 241140_at    | LMO7            | -1,639579028 | -1,663414495 | 0,023835466 |  |
| 241174_at    | AP4E1           | -1,026571149 | -1,050406615 | 0,023835466 |  |
| 241308_at    | -               | -1,639579028 | -1,663414495 | 0,023835466 |  |
| 241487_at    | -               | -1,639579028 | -1,663414495 | 0,023835466 |  |
| 241584_at    | -               | -1,639579028 | -1,663414495 | 0,023835466 |  |
| 241728_at    | -               | -1,763254337 | -1,787089803 | 0,023835466 |  |
| 242678_at    | -               | -1,470833215 | -1,494668682 | 0,023835466 |  |
| 242681_at    | -               | -1,838812296 | -1,862647763 | 0,023835466 |  |
| 242700_at    | PON2            | -1,240169874 | -1,264005341 | 0,023835466 |  |
| 242785_at    | EML6            | -1,838812296 | -1,862647763 | 0,023835466 |  |
| 242828_at    | FIGN            | -1,639579028 | -1,663414495 | 0,023835466 |  |
| 242836_at    | -               | -1,763254337 | -1,787089803 | 0,023835466 |  |
| 242876_at    | AKT3            | -1,353583928 | -1,377419394 | 0,023835466 |  |
| 243091_at    | -               | -0,706943342 | -0,730778808 | 0,023835466 |  |
| 243113_at    | -               | -1,240169874 | -1,264005341 | 0,023835466 |  |
| 243123_at    | -               | -1,838812296 | -1,862647763 | 0,023835466 |  |
| 243403_x_at  | CPM             | -1,639579028 | -1,663414495 | 0,023835466 |  |
| 243787_at    | -               | -1,71423189  | -1,738067356 | 0,023835466 |  |
| 244137_at    | KIAA0317        | -1,353583928 | -1,377419394 | 0,023835466 |  |
| 244152_at    | -               | -0,79540287  | -0,819238336 | 0,023835466 |  |
| 244187_at    | -               | -0,79540287  | -0,819238336 | 0,023835466 |  |
| 244355_at    | AVL9            | -1,591296941 | -1,615132408 | 0,023835466 |  |
| 244662_at    | MBD5            | -1,131062212 | -1,154897679 | 0,023835466 |  |
| 244683_at    | -               | -1,308181863 | -1,332017329 | 0,023835466 |  |
| 1552367_a_at | SCIN            | -2,667025278 | -2,690860744 | 0,023835466 |  |
| 1552522_at   | TIGD4           | -2,972500237 | -2,996335703 | 0,023835466 |  |
| 1552732_at   | ABRA            | -3,212234735 | -3,236070201 | 0,023835466 |  |
| 1553265_at   | SLC23A3         | -2,667025278 | -2,690860744 | 0,023835466 |  |

|              |                 |              |              |             |  |
|--------------|-----------------|--------------|--------------|-------------|--|
| 1553434_at   | CYP4Z2P         | -2,551294263 | -2,575129729 | 0,023835466 |  |
| 1553757_at   | IQCG            | -2,138804305 | -2,162639771 | 0,023835466 |  |
| 1554072_s_at | CCDC67          | -2,866296344 | -2,89013181  | 0,023835466 |  |
| 1554789_a_at | PDE8B           | -2,866296344 | -2,89013181  | 0,023835466 |  |
| 1554920_at   | SCEL            | -3,250025915 | -3,273861381 | 0,023835466 |  |
| 1554960_at   | C1orf110        | -2,667025278 | -2,690860744 | 0,023835466 |  |
| 1555346_at   | CDC20B          | -2,551294263 | -2,575129729 | 0,023835466 |  |
| 1555489_at   | -               | -2,551294263 | -2,575129729 | 0,023835466 |  |
| 1555513_at   | PIAS2           | -3,250025915 | -3,273861381 | 0,023835466 |  |
| 1555648_at   | FOXP2           | -2,972500237 | -2,996335703 | 0,023835466 |  |
| 1555749_at   | SF1             | -2,551294263 | -2,575129729 | 0,023835466 |  |
| 1555755_at   | -               | -2,667025278 | -2,690860744 | 0,023835466 |  |
| 1555774_at   | ZAR1            | -2,551294263 | -2,575129729 | 0,023835466 |  |
| 1555876_at   | SRGAP1          | -2,667025278 | -2,690860744 | 0,023835466 |  |
| 1556081_at   | -               | -2,972500237 | -2,996335703 | 0,023835466 |  |
| 1557057_a_at | C5orf47         | -3,212234735 | -3,236070201 | 0,023835466 |  |
| 1557519_at   | -               | -2,551294263 | -2,575129729 | 0,023835466 |  |
| 1558185_at   | CLLU1 /// LOC10 | -3,212234735 | -3,236070201 | 0,023835466 |  |
| 1558234_at   | KCNJ2-AS1       | -3,212234735 | -3,236070201 | 0,023835466 |  |
| 1558293_at   | KIAA1107        | -2,138804305 | -2,162639771 | 0,023835466 |  |
| 1558295_a_at | PPFIA2          | -2,138804305 | -2,162639771 | 0,023835466 |  |
| 1558411_at   | EGFEM1P         | -2,972500237 | -2,996335703 | 0,023835466 |  |
| 1558603_at   | PLGLB2          | -2,667025278 | -2,690860744 | 0,023835466 |  |
| 1559280_a_at | LOC100506013    | -2,866296344 | -2,89013181  | 0,023835466 |  |
| 1559506_x_at | MIR137HG /// MI | -3,250025915 | -3,273861381 | 0,023835466 |  |
| 1559510_at   | LOC100287765    | -2,138804305 | -2,162639771 | 0,023835466 |  |
| 1560108_at   | -               | -2,138804305 | -2,162639771 | 0,023835466 |  |
| 1560161_at   | CCNB2           | -2,551294263 | -2,575129729 | 0,023835466 |  |
| 1560174_at   | SPAG16          | -2,667025278 | -2,690860744 | 0,023835466 |  |
| 1560359_at   | PELO            | -2,866296344 | -2,89013181  | 0,023835466 |  |
| 1561198_at   | LOC100506127    | -2,972500237 | -2,996335703 | 0,023835466 |  |
| 1561615_s_at | SLC8A1          | -2,551294263 | -2,575129729 | 0,023835466 |  |
| 1561765_at   | -               | -3,250025915 | -3,273861381 | 0,023835466 |  |
| 1562076_at   | -               | -3,250025915 | -3,273861381 | 0,023835466 |  |
| 1562839_at   | LOC100272228    | -2,866296344 | -2,89013181  | 0,023835466 |  |
| 1562991_at   | ZNF292          | -3,250025915 | -3,273861381 | 0,023835466 |  |
| 1563110_at   | -               | -2,972500237 | -2,996335703 | 0,023835466 |  |
| 1563610_at   | LOC157273       | -2,972500237 | -2,996335703 | 0,023835466 |  |
| 1563927_a_at | LOC401463       | -2,667025278 | -2,690860744 | 0,023835466 |  |
| 1564192_at   | -               | -2,972500237 | -2,996335703 | 0,023835466 |  |
| 1564299_at   | LOC100127940    | -2,866296344 | -2,89013181  | 0,023835466 |  |
| 1564323_at   | -               | -2,551294263 | -2,575129729 | 0,023835466 |  |
| 1564855_at   | LOC727924       | -2,551294263 | -2,575129729 | 0,023835466 |  |
| 1565937_a_at | LMO3            | -2,866296344 | -2,89013181  | 0,023835466 |  |
| 1566096_x_at | -               | -2,972500237 | -2,996335703 | 0,023835466 |  |
| 1566888_at   | THADA           | -2,551294263 | -2,575129729 | 0,023835466 |  |
| 1567303_at   | -               | -3,250025915 | -3,273861381 | 0,023835466 |  |
| 1568736_s_at | -               | -2,551294263 | -2,575129729 | 0,023835466 |  |
| 1569716_at   | -               | -2,866296344 | -2,89013181  | 0,023835466 |  |
| 1569960_at   | BRD7P3          | -2,667025278 | -2,690860744 | 0,023835466 |  |
| 1570160_at   | -               | -2,972500237 | -2,996335703 | 0,023835466 |  |
| 1570594_at   | -               | -2,866296344 | -2,89013181  | 0,023835466 |  |
| 1570632_at   | -               | -2,667025278 | -2,690860744 | 0,023835466 |  |
| 203570_at    | LOXL1           | -2,667025278 | -2,690860744 | 0,023835466 |  |
| 204712_at    | WIF1            | -2,667025278 | -2,690860744 | 0,023835466 |  |
| 204985_s_at  | TRAPPC6A        | 3,109000457  | 3,08516499   | 0,023835466 |  |

|             |          |              |              |             |  |
|-------------|----------|--------------|--------------|-------------|--|
| 205496_at   | KIAA0408 | -2,972500237 | -2,996335703 | 0,023835466 |  |
| 206165_s_at | CLCA2    | -2,866296344 | -2,89013181  | 0,023835466 |  |
| 207119_at   | PRKG1    | -2,972500237 | -2,996335703 | 0,023835466 |  |
| 207843_x_at | CYB5A    | 1,614289682  | 1,590454215  | 0,023835466 |  |
| 209537_at   | EXTL2    | 2,834621043  | 2,810785576  | 0,023835466 |  |
| 210277_at   | AP4S1    | 2,705069849  | 2,681234383  | 0,023835466 |  |
| 210525_x_at | EFCAB11  | -2,551294263 | -2,575129729 | 0,023835466 |  |
| 212489_at   | COL5A1   | -2,138804305 | -2,162639771 | 0,023835466 |  |
| 214258_x_at | KAT5     | 2,44295215   | 2,419116683  | 0,023835466 |  |
| 214702_at   | FN1      | -2,866296344 | -2,89013181  | 0,023835466 |  |
| 215324_at   | SEMA3D   | -2,866296344 | -2,89013181  | 0,023835466 |  |
| 215361_at   | DOCK5    | -2,667025278 | -2,690860744 | 0,023835466 |  |
| 215597_x_at | -        | -2,667025278 | -2,690860744 | 0,023835466 |  |
| 215653_at   | -        | -3,212234735 | -3,236070201 | 0,023835466 |  |
| 215793_at   | MTMR7    | -2,667025278 | -2,690860744 | 0,023835466 |  |
| 216015_s_at | NLRP3    | -2,138804305 | -2,162639771 | 0,023835466 |  |
| 216167_at   | LRRN2    | -2,667025278 | -2,690860744 | 0,023835466 |  |
| 216169_at   | -        | -2,551294263 | -2,575129729 | 0,023835466 |  |
| 216752_at   | PIK3R4   | -2,972500237 | -2,996335703 | 0,023835466 |  |
| 216865_at   | COL14A1  | -2,551294263 | -2,575129729 | 0,023835466 |  |
| 217245_at   | EPAG     | -2,138804305 | -2,162639771 | 0,023835466 |  |
| 218860_at   | NOC4L    | 2,303618506  | 2,27978304   | 0,023835466 |  |
| 219091_s_at | MMRN2    | -2,138804305 | -2,162639771 | 0,023835466 |  |
| 219995_s_at | ZNF750   | -3,32387526  | -3,347710726 | 0,023835466 |  |
| 220247_at   | CASC5    | -2,972500237 | -2,996335703 | 0,023835466 |  |
| 220518_at   | ABI3BP   | -2,972500237 | -2,996335703 | 0,023835466 |  |
| 220564_at   | RNLS     | -2,551294263 | -2,575129729 | 0,023835466 |  |
| 222025_s_at | OPLAH    | -2,138804305 | -2,162639771 | 0,023835466 |  |
| 222999_s_at | CCNL2    | 3,620156261  | 3,596320795  | 0,023835466 |  |
| 223843_at   | SCARA3   | -2,866296344 | -2,89013181  | 0,023835466 |  |
| 224127_at   | -        | -2,667025278 | -2,690860744 | 0,023835466 |  |
| 224403_at   | FCRL4    | -2,667025278 | -2,690860744 | 0,023835466 |  |
| 224520_s_at | BEST3    | -2,551294263 | -2,575129729 | 0,023835466 |  |
| 224925_at   | PREX1    | -2,138804305 | -2,162639771 | 0,023835466 |  |
| 226225_at   | MCC      | -2,138804305 | -2,162639771 | 0,023835466 |  |
| 226938_at   | DCAF4    | 3,308224834  | 3,284389368  | 0,023835466 |  |
| 228051_at   | KIAA1244 | -2,866296344 | -2,89013181  | 0,023835466 |  |
| 228063_s_at | NAP1L5   | 2,146943689  | 2,123108223  | 0,023835466 |  |
| 228503_at   | RPS6KA6  | -2,551294263 | -2,575129729 | 0,023835466 |  |
| 229266_at   | SHISA6   | -2,667025278 | -2,690860744 | 0,023835466 |  |
| 229779_at   | COL4A4   | -2,866296344 | -2,89013181  | 0,023835466 |  |
| 230225_x_at | -        | -3,212234735 | -3,236070201 | 0,023835466 |  |
| 230718_at   | HSF5     | -2,667025278 | -2,690860744 | 0,023835466 |  |
| 231773_at   | ANGPTL1  | -2,972500237 | -2,996335703 | 0,023835466 |  |
| 232603_at   | DCDC5    | -3,212234735 | -3,236070201 | 0,023835466 |  |
| 232818_at   | -        | -2,551294263 | -2,575129729 | 0,023835466 |  |
| 233273_at   | -        | -2,972500237 | -2,996335703 | 0,023835466 |  |
| 233680_at   | -        | -2,667025278 | -2,690860744 | 0,023835466 |  |
| 233856_at   | -        | -2,667025278 | -2,690860744 | 0,023835466 |  |
| 233884_at   | HIVEP3   | -2,866296344 | -2,89013181  | 0,023835466 |  |
| 234064_at   | -        | -2,667025278 | -2,690860744 | 0,023835466 |  |
| 234473_at   | -        | -2,667025278 | -2,690860744 | 0,023835466 |  |
| 234678_at   | KRTAP4-3 | -2,551294263 | -2,575129729 | 0,023835466 |  |
| 234861_at   | LOC93463 | -2,972500237 | -2,996335703 | 0,023835466 |  |
| 235247_at   | -        | -2,866296344 | -2,89013181  | 0,023835466 |  |
| 235971_at   | -        | -2,138804305 | -2,162639771 | 0,023835466 |  |

|             |                 |              |              |             |  |
|-------------|-----------------|--------------|--------------|-------------|--|
| 236984_at   | C4orf26         | -2,551294263 | -2,575129729 | 0,023835466 |  |
| 237332_at   | -               | -2,138804305 | -2,162639771 | 0,023835466 |  |
| 237496_at   | -               | -2,972500237 | -2,996335703 | 0,023835466 |  |
| 238079_at   | TPM3            | -2,866296344 | -2,89013181  | 0,023835466 |  |
| 238626_at   | ANKS6           | -2,551294263 | -2,575129729 | 0,023835466 |  |
| 238680_at   | METTL12 /// SNC | -2,138804305 | -2,162639771 | 0,023835466 |  |
| 238751_at   | -               | -2,667025278 | -2,690860744 | 0,023835466 |  |
| 238858_at   | TIFA            | -2,551294263 | -2,575129729 | 0,023835466 |  |
| 239650_at   | NCKAP5          | -3,250025915 | -3,273861381 | 0,023835466 |  |
| 239827_at   | RGCC            | -2,138804305 | -2,162639771 | 0,023835466 |  |
| 239830_at   | -               | -2,551294263 | -2,575129729 | 0,023835466 |  |
| 239890_s_at | SERP2           | -2,667025278 | -2,690860744 | 0,023835466 |  |
| 239962_at   | -               | -3,212234735 | -3,236070201 | 0,023835466 |  |
| 240132_at   | -               | -2,667025278 | -2,690860744 | 0,023835466 |  |
| 240356_s_at | -               | -2,972500237 | -2,996335703 | 0,023835466 |  |
| 241384_x_at | GK5             | -2,138804305 | -2,162639771 | 0,023835466 |  |
| 241390_at   | -               | -3,212234735 | -3,236070201 | 0,023835466 |  |
| 241507_x_at | -               | -2,972500237 | -2,996335703 | 0,023835466 |  |
| 241554_at   | -               | -2,667025278 | -2,690860744 | 0,023835466 |  |
| 241587_at   | NAALADL2-AS3    | -3,212234735 | -3,236070201 | 0,023835466 |  |
| 242144_at   | -               | -2,138804305 | -2,162639771 | 0,023835466 |  |
| 242299_at   | -               | -2,551294263 | -2,575129729 | 0,023835466 |  |
| 242488_at   | CHRM3           | -2,866296344 | -2,89013181  | 0,023835466 |  |
| 242706_s_at | MED23           | 2,44295215   | 2,419116683  | 0,023835466 |  |
| 242849_at   | -               | -2,667025278 | -2,690860744 | 0,023835466 |  |
| 242948_x_at | -               | -2,866296344 | -2,89013181  | 0,023835466 |  |
| 243533_x_at | -               | -2,138804305 | -2,162639771 | 0,023835466 |  |
| 243535_at   | -               | -2,138804305 | -2,162639771 | 0,023835466 |  |
| 243813_at   | LOC100507632    | -2,667025278 | -2,690860744 | 0,023835466 |  |
| 243940_at   | TSHZ2           | -3,212234735 | -3,236070201 | 0,023835466 |  |
| 244608_at   | -               | -2,551294263 | -2,575129729 | 0,023835466 |  |
| 244874_at   | CHST15          | -2,551294263 | -2,575129729 | 0,023835466 |  |
| 205458_at   | MC1R            | 0,083054335  | 0,059218869  | 0,023835466 |  |
| 210123_s_at | CHRFAM7A /// C  | 0,083054335  | 0,059218869  | 0,023835466 |  |
| 220612_at   | -               | 0,083054335  | 0,059218869  | 0,023835466 |  |
| 227119_at   | CNOT6L          | 0,083054335  | 0,059218869  | 0,023835466 |  |
| 237016_at   | TMEM217         | 0,083054335  | 0,059218869  | 0,023835466 |  |
| 206617_s_at | RENP            | -0,022466681 | -0,046302147 | 0,023835466 |  |
| 226250_at   | -               | -0,022466681 | -0,046302147 | 0,023835466 |  |
| 228903_at   | CES4A           | -0,022466681 | -0,046302147 | 0,023835466 |  |
| 225535_s_at | TIMM23          | 5,186133489  | 5,162298023  | 0,023835466 |  |
| 224144_at   | SPTBN4          | 0,03125738   | 0,007421914  | 0,023835466 |  |
| 225929_s_at | RNF213          | 0,03125738   | 0,007421914  | 0,023835466 |  |
| 231004_s_at | H1FX            | 0,03125738   | 0,007421914  | 0,023835466 |  |
| 231065_at   | PDE6D           | 0,03125738   | 0,007421914  | 0,023835466 |  |
| 204740_at   | CNKS1R          | -0,055687482 | -0,079522948 | 0,023835466 |  |
| 204864_s_at | IL6ST           | -0,055687482 | -0,079522948 | 0,023835466 |  |
| 209598_at   | PNMA2           | -0,055687482 | -0,079522948 | 0,023835466 |  |
| 216530_at   | -               | -0,055687482 | -0,079522948 | 0,023835466 |  |
| 232890_at   | -               | -0,055687482 | -0,079522948 | 0,023835466 |  |
| 236598_at   | -               | -0,055687482 | -0,079522948 | 0,023835466 |  |
| 243528_at   | -               | -0,055687482 | -0,079522948 | 0,023835466 |  |
| 207528_s_at | SLC7A11         | -0,00073712  | -0,024572586 | 0,023835466 |  |
| 210994_x_at | TRIM23          | 0,052199481  | 0,028364014  | 0,023835466 |  |
| 219542_at   | NEK11           | -0,00073712  | -0,024572586 | 0,023835466 |  |
| 221161_at   | ASCL3           | 0,052199481  | 0,028364014  | 0,023835466 |  |

|              |                 |              |              |             |  |
|--------------|-----------------|--------------|--------------|-------------|--|
| 224794_s_at  | CERCAM /// LOC  | -0,00073712  | -0,024572586 | 0,023835466 |  |
| 227371_at    | BAIAP2L1        | 0,052199481  | 0,028364014  | 0,023835466 |  |
| 235966_at    | DAB2IP          | 0,052199481  | 0,028364014  | 0,023835466 |  |
| 236421_at    | ANKRD45         | 0,052199481  | 0,028364014  | 0,023835466 |  |
| 241095_at    | -               | -0,00073712  | -0,024572586 | 0,023835466 |  |
| 1552315_at   | GIMAP1          | -0,83191556  | -0,855751026 | 0,023835466 |  |
| 1552792_at   | SOCS4           | -0,59053611  | -0,614371577 | 0,023835466 |  |
| 1552964_at   | TTC40           | -0,59053611  | -0,614371577 | 0,023835466 |  |
| 1553673_at   | STK35           | -0,888496123 | -0,912331589 | 0,023835466 |  |
| 1554322_a_at | HDAC4           | -0,926850548 | -0,950686014 | 0,023835466 |  |
| 1554588_a_at | TTC30B          | -0,512251684 | -0,536087151 | 0,023835466 |  |
| 1554592_a_at | SLC1A6          | -0,394749123 | -0,41858459  | 0,023835466 |  |
| 1554773_at   | WFIKK2          | -0,59053611  | -0,614371577 | 0,023835466 |  |
| 1554907_a_at | HYDIN /// HYDIN | -0,366776884 | -0,39061235  | 0,023835466 |  |
| 1555979_at   | LOC100130417    | -0,926850548 | -0,950686014 | 0,023835466 |  |
| 1557147_a_at | -               | -0,467091869 | -0,490927335 | 0,023835466 |  |
| 1557595_at   | GIN52           | -0,366776884 | -0,39061235  | 0,023835466 |  |
| 1559796_at   | EBF3            | -0,655928373 | -0,679763839 | 0,023835466 |  |
| 1560636_a_at | HSPC081         | -0,888496123 | -0,912331589 | 0,023835466 |  |
| 1561039_a_at | ZNF81           | 0,480753764  | 0,456918297  | 0,023835466 |  |
| 1562272_at   | -               | -0,59053611  | -0,614371577 | 0,023835466 |  |
| 1562697_at   | LOC339988       | 0,541261317  | 0,51742585   | 0,023835466 |  |
| 1564482_at   | ATP5O           | -0,83191556  | -0,855751026 | 0,023835466 |  |
| 1564823_at   | CDC42BPG        | -0,543051993 | -0,566887459 | 0,023835466 |  |
| 1566183_at   | -               | -0,926850548 | -0,950686014 | 0,023835466 |  |
| 1568675_at   | CHRNA10         | -0,366776884 | -0,39061235  | 0,023835466 |  |
| 1568913_at   | NSUN3           | -0,655928373 | -0,679763839 | 0,023835466 |  |
| 1569009_s_at | FAM201B /// LOC | -0,83191556  | -0,855751026 | 0,023835466 |  |
| 1569776_at   | -               | -0,543051993 | -0,566887459 | 0,023835466 |  |
| 1570336_at   | BDH1            | -0,741668563 | -0,765504029 | 0,023835466 |  |
| 201579_at    | FAT1            | -0,83191556  | -0,855751026 | 0,023835466 |  |
| 203129_s_at  | KIF5C           | -0,741668563 | -0,765504029 | 0,023835466 |  |
| 203579_s_at  | SLC7A6          | 0,401366113  | 0,377530647  | 0,023835466 |  |
| 203809_s_at  | AKT2            | 0,695652136  | 0,67181667   | 0,023835466 |  |
| 204705_x_at  | ALDOB           | -0,59053611  | -0,614371577 | 0,023835466 |  |
| 204912_at    | IL10RA          | -0,467091869 | -0,490927335 | 0,023835466 |  |
| 205040_at    | ORM1            | -0,888496123 | -0,912331589 | 0,023835466 |  |
| 205835_s_at  | YTHDC2          | -0,655928373 | -0,679763839 | 0,023835466 |  |
| 206038_s_at  | NR2C2           | -0,926850548 | -0,950686014 | 0,023835466 |  |
| 206274_s_at  | CROCC           | -0,888496123 | -0,912331589 | 0,023835466 |  |
| 206533_at    | CHRNA5          | -0,512251684 | -0,536087151 | 0,023835466 |  |
| 206694_at    | PNLIPRP1        | -0,467091869 | -0,490927335 | 0,023835466 |  |
| 207051_at    | SLC17A4         | -0,655928373 | -0,679763839 | 0,023835466 |  |
| 208033_s_at  | ZFH3            | -0,655928373 | -0,679763839 | 0,023835466 |  |
| 208106_x_at  | PSG6            | -0,366776884 | -0,39061235  | 0,023835466 |  |
| 208285_at    | OR7A5           | -0,888496123 | -0,912331589 | 0,023835466 |  |
| 208365_s_at  | GRK4            | -0,83191556  | -0,855751026 | 0,023835466 |  |
| 208560_at    | KCNA10          | -0,888496123 | -0,912331589 | 0,023835466 |  |
| 208590_x_at  | GJA3            | -0,741668563 | -0,765504029 | 0,023835466 |  |
| 209052_s_at  | WHSC1           | 0,810733188  | 0,786897721  | 0,023835466 |  |
| 210364_at    | SCN2B           | -0,543051993 | -0,566887459 | 0,023835466 |  |
| 210599_at    | ZNF614          | -0,394749123 | -0,41858459  | 0,023835466 |  |
| 211143_x_at  | NR4A1           | 0,401366113  | 0,377530647  | 0,023835466 |  |
| 213016_at    | BBX             | 0,859074518  | 0,835239052  | 0,023835466 |  |
| 214286_at    | GNAT1           | -0,83191556  | -0,855751026 | 0,023835466 |  |
| 214360_at    | SMARCA4         | -0,83191556  | -0,855751026 | 0,023835466 |  |

|             |                 |              |              |             |  |
|-------------|-----------------|--------------|--------------|-------------|--|
| 214740_at   | POLR2J2 /// POL | -0,543051993 | -0,566887459 | 0,023835466 |  |
| 214825_at   | FAM155A         | 0,541261317  | 0,51742585   | 0,023835466 |  |
| 214972_at   | MGEA5           | -0,394749123 | -0,41858459  | 0,023835466 |  |
| 215131_at   | IQCK            | -0,543051993 | -0,566887459 | 0,023835466 |  |
| 215414_at   | FARS2           | -0,83191556  | -0,855751026 | 0,023835466 |  |
| 215459_at   | CTNS            | -0,83191556  | -0,855751026 | 0,023835466 |  |
| 216014_s_at | ZXDA /// ZXDB   | -0,59053611  | -0,614371577 | 0,023835466 |  |
| 216684_s_at | SS18            | 0,888485433  | 0,864649967  | 0,023835466 |  |
| 216915_s_at | PTPN12          | 0,695652136  | 0,67181667   | 0,023835466 |  |
| 218029_at   | FAM65A          | 0,900083947  | 0,876248481  | 0,023835466 |  |
| 219020_at   | HS1BP3          | 0,661985843  | 0,638150376  | 0,023835466 |  |
| 219501_at   | ENOX1           | -0,394749123 | -0,41858459  | 0,023835466 |  |
| 219760_at   | LIN7B           | 0,480753764  | 0,456918297  | 0,023835466 |  |
| 219838_at   | TTC23           | 0,917308734  | 0,893473268  | 0,023835466 |  |
| 220567_at   | IKZF2           | -0,83191556  | -0,855751026 | 0,023835466 |  |
| 220770_s_at | C5orf54         | 0,376672223  | 0,352836757  | 0,023835466 |  |
| 220987_s_at | AKIP1 /// NUA2  | -0,741668563 | -0,765504029 | 0,023835466 |  |
| 221128_at   | ADAM19          | -0,83191556  | -0,855751026 | 0,023835466 |  |
| 221348_at   | NPPC            | -0,83191556  | -0,855751026 | 0,023835466 |  |
| 221415_s_at | GJA9 /// GJA9-M | -0,259832361 | -0,283667828 | 0,023835466 |  |
| 221769_at   | SPSB3           | 0,661985843  | 0,638150376  | 0,023835466 |  |
| 221942_s_at | GUCY1A3         | -0,888496123 | -0,912331589 | 0,023835466 |  |
| 222928_s_at | FAM160B2        | -0,512251684 | -0,536087151 | 0,023835466 |  |
| 223530_at   | TDRKH           | 0,728550685  | 0,704715219  | 0,023835466 |  |
| 223595_at   | TMEM133         | -0,467091869 | -0,490927335 | 0,023835466 |  |
| 223621_at   | PNMA3           | 0,928678725  | 0,904843258  | 0,023835466 |  |
| 223787_s_at | C3orf19         | 0,917308734  | 0,893473268  | 0,023835466 |  |
| 223920_s_at | TP53AIP1        | -0,512251684 | -0,536087151 | 0,023835466 |  |
| 224490_s_at | KANSL1          | 0,592200562  | 0,568365095  | 0,023835466 |  |
| 224580_at   | SLC38A1         | -0,467091869 | -0,490927335 | 0,023835466 |  |
| 226328_at   | KLF16           | 0,888485433  | 0,864649967  | 0,023835466 |  |
| 226429_at   | KIAA1704        | 0,592200562  | 0,568365095  | 0,023835466 |  |
| 227057_at   | ARHGAP27        | -0,926850548 | -0,950686014 | 0,023835466 |  |
| 227355_at   | RBM26           | -0,59053611  | -0,614371577 | 0,023835466 |  |
| 227401_at   | IL17D           | 0,480753764  | 0,456918297  | 0,023835466 |  |
| 227720_at   | ANKRD13B        | -0,512251684 | -0,536087151 | 0,023835466 |  |
| 227879_at   | ALKBH7          | -0,83191556  | -0,855751026 | 0,023835466 |  |
| 227914_s_at | UBE3B           | -0,655928373 | -0,679763839 | 0,023835466 |  |
| 228117_at   | LOC100132273    | -0,543051993 | -0,566887459 | 0,023835466 |  |
| 229136_s_at | -               | 0,480753764  | 0,456918297  | 0,023835466 |  |
| 229415_at   | CYCS            | 0,810733188  | 0,786897721  | 0,023835466 |  |
| 229585_at   | ADAMTSL1        | -0,926850548 | -0,950686014 | 0,023835466 |  |
| 229940_at   | SETD3           | -0,543051993 | -0,566887459 | 0,023835466 |  |
| 230079_at   | ST7L            | 0,695652136  | 0,67181667   | 0,023835466 |  |
| 230974_at   | DDX19B          | 0,401366113  | 0,377530647  | 0,023835466 |  |
| 232283_at   | LYSMD1          | -0,512251684 | -0,536087151 | 0,023835466 |  |
| 232358_at   | KIAA1328        | -0,543051993 | -0,566887459 | 0,023835466 |  |
| 232433_at   | KIAA1683        | -0,259832361 | -0,283667828 | 0,023835466 |  |
| 232532_at   | QRICH2          | -0,888496123 | -0,912331589 | 0,023835466 |  |
| 232921_at   | KIAA1549        | -0,741668563 | -0,765504029 | 0,023835466 |  |
| 233145_at   | CSMD2           | -0,741668563 | -0,765504029 | 0,023835466 |  |
| 233224_at   | -               | -0,59053611  | -0,614371577 | 0,023835466 |  |
| 233258_at   | -               | -0,259832361 | -0,283667828 | 0,023835466 |  |
| 233787_at   | C6orf163        | -0,741668563 | -0,765504029 | 0,023835466 |  |
| 235412_at   | ARHGEF7         | -0,543051993 | -0,566887459 | 0,023835466 |  |
| 235415_at   | RPRD2           | -0,83191556  | -0,855751026 | 0,023835466 |  |

|              |                |              |              |             |  |
|--------------|----------------|--------------|--------------|-------------|--|
| 235706_at    | CPM            | -0,512251684 | -0,536087151 | 0,023835466 |  |
| 235738_at    | -              | -0,888496123 | -0,912331589 | 0,023835466 |  |
| 235889_at    | -              | 0,888485433  | 0,864649967  | 0,023835466 |  |
| 236147_at    | -              | -0,741668563 | -0,765504029 | 0,023835466 |  |
| 236498_s_at  | C1orf86        | -0,83191556  | -0,855751026 | 0,023835466 |  |
| 236585_at    | -              | -0,512251684 | -0,536087151 | 0,023835466 |  |
| 236708_at    | -              | -0,655928373 | -0,679763839 | 0,023835466 |  |
| 236916_at    | -              | -0,926850548 | -0,950686014 | 0,023835466 |  |
| 237495_at    | MPP7           | -0,83191556  | -0,855751026 | 0,023835466 |  |
| 237600_at    | -              | -0,888496123 | -0,912331589 | 0,023835466 |  |
| 237666_at    | XRRA1          | -0,888496123 | -0,912331589 | 0,023835466 |  |
| 237887_at    | -              | 0,810733188  | 0,786897721  | 0,023835466 |  |
| 237899_at    | LOC100506374   | -0,512251684 | -0,536087151 | 0,023835466 |  |
| 238053_at    | DHRX           | -0,59053611  | -0,614371577 | 0,023835466 |  |
| 238486_at    | FRS2           | -0,259832361 | -0,283667828 | 0,023835466 |  |
| 238953_at    | LOC100506325   | -0,366776884 | -0,39061235  | 0,023835466 |  |
| 239342_at    | DGKZ           | -0,741668563 | -0,765504029 | 0,023835466 |  |
| 239347_at    | -              | -0,926850548 | -0,950686014 | 0,023835466 |  |
| 239833_at    | -              | -0,59053611  | -0,614371577 | 0,023835466 |  |
| 240368_at    | -              | -0,83191556  | -0,855751026 | 0,023835466 |  |
| 240528_s_at  | EXOC4          | 0,859074518  | 0,835239052  | 0,023835466 |  |
| 241241_at    | -              | -0,543051993 | -0,566887459 | 0,023835466 |  |
| 242114_at    | -              | -0,83191556  | -0,855751026 | 0,023835466 |  |
| 242201_at    | PMS2P5         | 0,917308734  | 0,893473268  | 0,023835466 |  |
| 242394_at    | CNKS3          | -0,926850548 | -0,950686014 | 0,023835466 |  |
| 242447_at    | C3orf70        | -0,512251684 | -0,536087151 | 0,023835466 |  |
| 242561_at    | IPO9           | -0,655928373 | -0,679763839 | 0,023835466 |  |
| 242645_at    | -              | -0,926850548 | -0,950686014 | 0,023835466 |  |
| 242808_at    | -              | -0,512251684 | -0,536087151 | 0,023835466 |  |
| 242983_at    | -              | -0,83191556  | -0,855751026 | 0,023835466 |  |
| 243349_at    | KIAA1324       | -0,888496123 | -0,912331589 | 0,023835466 |  |
| 243439_at    | ZNF418         | -0,259832361 | -0,283667828 | 0,023835466 |  |
| 243589_at    | KANSL1         | 0,87091093   | 0,847075464  | 0,023835466 |  |
| 243595_at    | SHB            | -0,543051993 | -0,566887459 | 0,023835466 |  |
| 244121_at    | UBR3           | -0,926850548 | -0,950686014 | 0,023835466 |  |
| 244215_at    | -              | -0,888496123 | -0,912331589 | 0,023835466 |  |
| 244788_at    | -              | -0,543051993 | -0,566887459 | 0,023835466 |  |
| 1554001_at   | TRIM37         | -0,112808516 | -0,136643983 | 0,023835466 |  |
| 1557892_at   | LOC100144597   | -0,112808516 | -0,136643983 | 0,023835466 |  |
| 1560396_at   | KLHL6          | -0,112808516 | -0,136643983 | 0,023835466 |  |
| 1560689_s_at | AKT2           | -0,112808516 | -0,136643983 | 0,023835466 |  |
| 210932_s_at  | RNF6           | -0,112808516 | -0,136643983 | 0,023835466 |  |
| 213837_at    | L3MBTL1        | -0,112808516 | -0,136643983 | 0,023835466 |  |
| 241447_at    | ING5           | 0,133056859  | 0,109221392  | 0,023835466 |  |
| 1554074_s_at | SLFN1          | 0,152582607  | 0,128747141  | 0,023835466 |  |
| 1554919_s_at | C7orf63        | 0,20027154   | 0,176436073  | 0,023835466 |  |
| 1560652_at   | -              | 0,181384709  | 0,157549243  | 0,023835466 |  |
| 1561908_a_at | HS3ST3B1       | 0,20027154   | 0,176436073  | 0,023835466 |  |
| 1562810_at   | -              | -0,078265071 | -0,102100538 | 0,023835466 |  |
| 1569519_at   | LOC100506032 / | -0,172274514 | -0,19610998  | 0,023835466 |  |
| 201668_x_at  | MARCKS         | 0,152582607  | 0,128747141  | 0,023835466 |  |
| 202456_s_at  | ZER1           | 0,20027154   | 0,176436073  | 0,023835466 |  |
| 203365_s_at  | MMP15          | 0,181384709  | 0,157549243  | 0,023835466 |  |
| 204356_at    | LIMK1          | -0,078265071 | -0,102100538 | 0,023835466 |  |
| 204862_s_at  | NME3           | 0,246434561  | 0,222599095  | 0,023835466 |  |
| 204944_at    | PTPRG          | 0,228146222  | 0,204310755  | 0,023835466 |  |



|              |                  |              |              |             |  |
|--------------|------------------|--------------|--------------|-------------|--|
| 206748_s_at  | SPAG9            | 0,181384709  | 0,157549243  | 0,023835466 |  |
| 206857_s_at  | FKBP1B           | 0,20027154   | 0,176436073  | 0,023835466 |  |
| 207473_at    | MLN              | -0,172274514 | -0,19610998  | 0,023835466 |  |
| 210360_s_at  | MTSS1            | 0,181384709  | 0,157549243  | 0,023835466 |  |
| 210431_at    | ALPPL2           | -0,078265071 | -0,102100538 | 0,023835466 |  |
| 210750_s_at  | DLGAP1           | -0,172274514 | -0,19610998  | 0,023835466 |  |
| 214616_at    | HIST1H3A /// HIS | 0,152582607  | 0,128747141  | 0,023835466 |  |
| 214980_at    | UBE3A            | 0,152582607  | 0,128747141  | 0,023835466 |  |
| 216219_at    | AQP6             | 0,152582607  | 0,128747141  | 0,023835466 |  |
| 216425_at    | -                | -0,078265071 | -0,102100538 | 0,023835466 |  |
| 221387_at    | NPFFR1           | 0,152582607  | 0,128747141  | 0,023835466 |  |
| 224203_at    | SUFU             | 0,228146222  | 0,204310755  | 0,023835466 |  |
| 224543_at    | SVEP1            | 0,246434561  | 0,222599095  | 0,023835466 |  |
| 225389_at    | BTBD6            | -0,078265071 | -0,102100538 | 0,023835466 |  |
| 227438_at    | ALPK1            | -0,078265071 | -0,102100538 | 0,023835466 |  |
| 228556_at    | YTHDC1           | 0,246434561  | 0,222599095  | 0,023835466 |  |
| 230689_at    | -                | -0,172274514 | -0,19610998  | 0,023835466 |  |
| 231884_at    | CNTROB           | -0,172274514 | -0,19610998  | 0,023835466 |  |
| 232044_at    | RBBP6            | 0,228146222  | 0,204310755  | 0,023835466 |  |
| 232467_at    | KIRREL           | -0,172274514 | -0,19610998  | 0,023835466 |  |
| 233743_x_at  | S1PR5            | 0,246434561  | 0,222599095  | 0,023835466 |  |
| 238089_at    | MAN2C1           | -0,078265071 | -0,102100538 | 0,023835466 |  |
| 241756_at    | -                | 0,152582607  | 0,128747141  | 0,023835466 |  |
| 244580_at    | -                | -0,172274514 | -0,19610998  | 0,023835466 |  |
| 1559218_s_at | NFYC             | 0,359971644  | 0,336136178  | 0,023835466 |  |
| 1563273_at   | -                | 0,273439642  | 0,249604176  | 0,023835466 |  |
| 1570238_at   | ZNF527           | 0,273439642  | 0,249604176  | 0,023835466 |  |
| 205855_at    | ZNF197           | 0,359971644  | 0,336136178  | 0,023835466 |  |
| 206234_s_at  | MMP17            | 0,359971644  | 0,336136178  | 0,023835466 |  |
| 212820_at    | DMXL2            | 0,291166226  | 0,26733076   | 0,023835466 |  |
| 214050_at    | -                | -0,43775896  | -0,461594427 | 0,023835466 |  |
| 215743_at    | NMT2             | 0,457392764  | 0,433557298  | 0,023835466 |  |
| 219422_at    | ESPN             | 0,317354302  | 0,293518836  | 0,023835466 |  |
| 220454_s_at  | SEMA6A           | -0,43775896  | -0,461594427 | 0,023835466 |  |
| 222008_at    | COL9A1           | -0,43775896  | -0,461594427 | 0,023835466 |  |
| 223103_at    | STARD10          | 0,291166226  | 0,26733076   | 0,023835466 |  |
| 236180_at    | -                | 0,273439642  | 0,249604176  | 0,023835466 |  |
| 241944_x_at  | -                | -0,43775896  | -0,461594427 | 0,023835466 |  |
| 244082_at    | -                | -0,43775896  | -0,461594427 | 0,023835466 |  |
| 1569250_at   | ZNF333           | -0,986356909 | -1,010192375 | 0,023835466 |  |
| 202229_s_at  | CHERP            | 0,627515113  | 0,603679647  | 0,023835466 |  |
| 205513_at    | TCN1             | -0,986356909 | -1,010192375 | 0,023835466 |  |
| 208575_at    | HIST1H3A /// HIS | -0,986356909 | -1,010192375 | 0,023835466 |  |
| 220280_s_at  | ANKMY1           | -0,986356909 | -1,010192375 | 0,023835466 |  |
| 222594_s_at  | SPATS2           | 0,792179257  | 0,768343791  | 0,023835466 |  |
| 227845_s_at  | SHD              | -0,986356909 | -1,010192375 | 0,023835466 |  |
| 228124_at    | ABHD12           | 0,792179257  | 0,768343791  | 0,023835466 |  |
| 232730_at    | C19orf44         | 0,648296226  | 0,624460759  | 0,023835466 |  |
| 233256_at    | -                | -0,986356909 | -1,010192375 | 0,023835466 |  |
| 234002_at    | ABHD16B          | -0,986356909 | -1,010192375 | 0,023835466 |  |
| 240298_at    | LOC147791        | -0,986356909 | -1,010192375 | 0,023835466 |  |
| 241301_at    | -                | -0,986356909 | -1,010192375 | 0,023835466 |  |
| 241948_at    | -                | -0,986356909 | -1,010192375 | 0,023835466 |  |
| 201910_at    | FARP1            | 0,103263601  | 0,079428135  | 0,023835466 |  |
| 236867_at    | -                | 0,103263601  | 0,079428135  | 0,023835466 |  |
| 215170_s_at  | CEP152           | 1,000476627  | 0,976641161  | 0,023835466 |  |

|              |                  |              |              |             |  |
|--------------|------------------|--------------|--------------|-------------|--|
| 238903_at    | UBXN2B           | 1,011212064  | 0,987376598  | 0,023835466 |  |
| 1556917_a_at | -                | -2,479842156 | -2,503677622 | 0,023835466 |  |
| 1557511_at   | -                | -2,479842156 | -2,503677622 | 0,023835466 |  |
| 1558815_at   | SORBS2           | -2,479842156 | -2,503677622 | 0,023835466 |  |
| 1562481_at   | -                | -2,479842156 | -2,503677622 | 0,023835466 |  |
| 1562895_at   | -                | -2,479842156 | -2,503677622 | 0,023835466 |  |
| 1564533_at   | LOC643711        | -2,479842156 | -2,503677622 | 0,023835466 |  |
| 207173_x_at  | CDH11            | -2,479842156 | -2,503677622 | 0,023835466 |  |
| 210039_s_at  | PRKCQ            | 2,213529682  | 2,189694216  | 0,023835466 |  |
| 213652_at    | PCSK5            | -2,479842156 | -2,503677622 | 0,023835466 |  |
| 215405_at    | -                | -2,479842156 | -2,503677622 | 0,023835466 |  |
| 216992_s_at  | GRM8             | -2,479842156 | -2,503677622 | 0,023835466 |  |
| 217123_x_at  | PMCHL1           | -2,479842156 | -2,503677622 | 0,023835466 |  |
| 220539_at    | TTC40            | -2,479842156 | -2,503677622 | 0,023835466 |  |
| 224532_at    | USP26            | -2,479842156 | -2,503677622 | 0,023835466 |  |
| 226955_at    | AFAP1L1          | -2,479842156 | -2,503677622 | 0,023835466 |  |
| 231084_at    | WDR96            | -2,479842156 | -2,503677622 | 0,023835466 |  |
| 231315_at    | NKX2-1           | -2,479842156 | -2,503677622 | 0,023835466 |  |
| 232060_at    | ROR1             | -2,479842156 | -2,503677622 | 0,023835466 |  |
| 233668_at    | -                | -2,479842156 | -2,503677622 | 0,023835466 |  |
| 237631_at    | -                | -2,479842156 | -2,503677622 | 0,023835466 |  |
| 237951_at    | -                | -2,479842156 | -2,503677622 | 0,023835466 |  |
| 238134_at    | -                | -2,479842156 | -2,503677622 | 0,023835466 |  |
| 240018_at    | -                | -2,479842156 | -2,503677622 | 0,023835466 |  |
| 241962_at    | -                | -2,479842156 | -2,503677622 | 0,023835466 |  |
| 242430_at    | -                | -2,479842156 | -2,503677622 | 0,023835466 |  |
| 215156_at    | WDR61            | 1,224581536  | 1,200746069  | 0,023835466 |  |
| 238549_at    | CBFA2T2          | 1,767779954  | 1,743944487  | 0,023835466 |  |
| 204087_s_at  | SLC5A6           | 3,63931383   | 3,615478364  | 0,023835466 |  |
| 220949_s_at  | C7orf49 /// LOC6 | 3,621908408  | 3,598072942  | 0,023835466 |  |
| 225666_at    | TMTC4            | 1,318332599  | 1,294497133  | 0,023835466 |  |
| 226951_at    | C2orf49          | 2,201862497  | 2,17802703   | 0,023835466 |  |
| 238511_at    | LOC440288        | 1,318332599  | 1,294497133  | 0,023835466 |  |
| 243366_s_at  | -                | 3,225364068  | 3,201528602  | 0,023835466 |  |
| 50221_at     | TFEB             | -0,083957829 | -0,107775957 | 0,023818128 |  |
| 244740_at    | -                | 4,592823355  | 4,569434506  | 0,023388849 |  |
| 225419_at    | MPLKIP           | 4,496785894  | 4,473427782  | 0,023358112 |  |
| 201201_at    | CSTB             | 7,341197789  | 7,318093364  | 0,023104425 |  |
| 203931_s_at  | MRPL12           | 4,417795652  | 4,394968439  | 0,022827214 |  |
| 200817_x_at  | RPS10            | 8,233875279  | 8,211059878  | 0,022815401 |  |
| 224670_at    | SYS1             | 2,380152406  | 2,357351836  | 0,02280057  |  |
| 235207_at    | -                | 3,219589925  | 3,196911138  | 0,022678787 |  |
| 218150_at    | ARL5A            | 4,114752306  | 4,092160663  | 0,022591642 |  |
| 214047_s_at  | MBD4             | 5,087185056  | 5,064617399  | 0,022567657 |  |
| 200780_x_at  | GNAS             | 6,933912006  | 6,911354273  | 0,022557733 |  |
| 208739_x_at  | SUMO2            | 5,647224281  | 5,624678706  | 0,022545575 |  |
| 202583_s_at  | RANBP9           | 3,042527069  | 3,019999252  | 0,022527817 |  |
| 208722_s_at  | ANAPC5           | 3,945975838  | 3,923538485  | 0,022437353 |  |
| 218059_at    | ZNF706           | 5,247573834  | 5,225156313  | 0,022417521 |  |
| 209444_at    | RAP1GDS1         | 3,848325987  | 3,825986493  | 0,022339495 |  |
| 205880_at    | PRKD1            | 2,840652551  | 2,81832103   | 0,022331521 |  |
| 202872_at    | ATP6V1C1         | 3,800390846  | 3,778101865  | 0,022288982 |  |
| 201545_s_at  | BCL2L2-PABPN1    | 3,75400739   | 3,731768909  | 0,022238481 |  |
| 222240_s_at  | ISYNA1           | 2,716594694  | 2,694398145  | 0,02219655  |  |
| 200944_s_at  | HMGN1            | 7,381511472  | 7,35942032   | 0,022091151 |  |
| 219765_at    | ZNF329           | 2,621710292  | 2,599625088  | 0,022085204 |  |

|              |              |             |             |             |  |
|--------------|--------------|-------------|-------------|-------------|--|
| 202774_s_at  | SFSWAP       | 2,589836943 | 2,567790814 | 0,022046129 |  |
| 212837_at    | FAM175B      | 2,589836943 | 2,567790814 | 0,022046129 |  |
| 202121_s_at  | CHMP2A       | 3,582860873 | 3,560823412 | 0,022037462 |  |
| 212798_s_at  | ANKMY2       | 4,155242648 | 4,133220924 | 0,022021724 |  |
| 209503_s_at  | PSMC5        | 4,873632107 | 4,851633873 | 0,021998234 |  |
| 201230_s_at  | ARIH2        | 2,450859799 | 2,428994491 | 0,021865308 |  |
| 202172_at    | VEZF1        | 2,410880861 | 2,389070873 | 0,021809988 |  |
| 40472_at     | LPCAT4       | 1,400248659 | 1,378453643 | 0,021795016 |  |
| 233665_x_at  | MTO1         | 3,92199823  | 3,900294538 | 0,021703692 |  |
| 1552767_a_at | HS6ST2       | 3,336243945 | 3,314541423 | 0,021702522 |  |
| 225236_at    | RBM18        | 3,336243945 | 3,314541423 | 0,021702522 |  |
| 224791_at    | ASAP1        | 5,304868977 | 5,283213313 | 0,021655663 |  |
| 213490_s_at  | MAP2K2       | 2,259277178 | 2,237691445 | 0,021585732 |  |
| 214394_x_at  | EEF1D        | 6,754764566 | 6,733322659 | 0,021441907 |  |
| 218434_s_at  | AACS         | 3,067171967 | 3,045906378 | 0,021265589 |  |
| 202016_at    | MEST         | 6,817080726 | 6,795824013 | 0,021256713 |  |
| 220452_x_at  | -            | 2,027765132 | 2,006570641 | 0,021194491 |  |
| 210987_x_at  | TPM1         | 3,595400101 | 3,574237491 | 0,02116261  |  |
| 229128_s_at  | ANP32E       | 3,586454644 | 3,565308644 | 0,021146001 |  |
| 219553_at    | NME7         | 3,574742007 | 3,553617909 | 0,021124098 |  |
| 220248_x_at  | NSFL1C       | 4,305625125 | 4,284512471 | 0,021112653 |  |
| 209042_s_at  | UBE2G2       | 5,413307008 | 5,392251169 | 0,021055839 |  |
| 210215_at    | TFR2         | 2,938102794 | 2,917077481 | 0,021025314 |  |
| 225307_at    | ZNF511       | 3,512821151 | 3,491815843 | 0,021005308 |  |
| 224602_at    | C4orf3       | 5,245302218 | 5,224305713 | 0,020996506 |  |
| 202077_at    | NDUFAB1      | 6,682463892 | 6,661511506 | 0,020952387 |  |
| 212862_at    | CDS2         | 2,893830579 | 2,87289275  | 0,020937829 |  |
| 209111_at    | RNF5         | 5,02431927  | 5,003461658 | 0,020857612 |  |
| 208866_at    | CSNK1A1      | 2,849652795 | 2,828804976 | 0,020847819 |  |
| 216941_s_at  | TAF1B        | 1,841816345 | 1,820984782 | 0,020831564 |  |
| 51176_at     | MED27        | 3,419697503 | 3,398880704 | 0,020816798 |  |
| 203648_at    | TATDN2       | 2,834621043 | 2,813804482 | 0,02081656  |  |
| 222900_at    | NRIP3        | 1,795990708 | 1,775255987 | 0,02073472  |  |
| 235420_at    | HAPLN4       | 1,795990708 | 1,775255987 | 0,02073472  |  |
| 222632_s_at  | LZTFL1       | 2,783874823 | 2,763166224 | 0,020708599 |  |
| 225785_at    | REEP3        | 1,780386218 | 1,759685182 | 0,020701037 |  |
| 224810_s_at  | ANKRD13A     | 4,099113343 | 4,078419261 | 0,020694082 |  |
| 1555781_at   | PQLC2        | 1,748661581 | 1,728030156 | 0,020631425 |  |
| 226719_at    | DERL2        | 2,701760055 | 2,681234383 | 0,020525672 |  |
| 222143_s_at  | MTMR14       | 2,671625168 | 2,651169275 | 0,020455892 |  |
| 206572_x_at  | ZNF85        | 3,248232277 | 3,227795991 | 0,020436286 |  |
| 230285_at    | SVIP         | 2,654607516 | 2,634191677 | 0,020415839 |  |
| 225445_at    | UBN2         | 2,614687931 | 2,594367918 | 0,020320013 |  |
| 200680_x_at  | HMGB1        | 7,393677617 | 7,373363377 | 0,02031424  |  |
| 214931_s_at  | SRPK2        | 1,593009234 | 1,572742379 | 0,020266855 |  |
| 212472_at    | MICAL2       | 3,906268218 | 3,886022844 | 0,020245374 |  |
| 225221_at    | ZKSCAN1      | 3,152077493 | 3,131875186 | 0,020202307 |  |
| 224676_at    | TMED4        | 2,559073676 | 2,538891651 | 0,020182025 |  |
| 204020_at    | PURA         | 3,142344098 | 3,122166354 | 0,020177743 |  |
| 1558685_a_at | LOC158960    | 2,536956583 | 2,516830926 | 0,020125658 |  |
| 226050_at    | TMCO3        | 3,117719377 | 3,09760452  | 0,020114857 |  |
| 201346_at    | ADIPOR2      | 3,532516649 | 3,512402411 | 0,020114238 |  |
| 222992_s_at  | NDUFB9       | 7,251659322 | 7,231567765 | 0,020091557 |  |
| 200041_s_at  | ATP6V1G2-DDX | 5,606212153 | 5,58613355  | 0,020078603 |  |
| 217167_x_at  | GK           | 1,481627361 | 1,461646549 | 0,019980812 |  |
| 223242_s_at  | MFSD11       | 1,462198073 | 1,442269454 | 0,019928619 |  |

|             |                   |             |             |             |  |
|-------------|-------------------|-------------|-------------|-------------|--|
| 202946_s_at | BTBD3             | 3,024094427 | 3,004228687 | 0,01986574  |  |
| 209165_at   | AATF              | 3,425226911 | 3,405399563 | 0,019827348 |  |
| 211935_at   | ARL6IP1           | 5,643131999 | 5,623388815 | 0,019743184 |  |
| 230085_at   | PDK3              | 1,390002893 | 1,370274469 | 0,019728424 |  |
| 221591_s_at | FAM64A            | 2,38635068  | 2,366632651 | 0,019718029 |  |
| 219251_s_at | WDR60             | 2,355089531 | 2,335461563 | 0,019627968 |  |
| 213614_x_at | EEF1A1 /// LOC1   | 8,043099891 | 8,023589766 | 0,019510125 |  |
| 215333_x_at | GSTM1             | 1,314003737 | 1,294497133 | 0,019506604 |  |
| 228392_at   | ZNF302            | 2,896728217 | 2,877228323 | 0,019499894 |  |
| 227628_at   | GPX8              | 2,305800198 | 2,286318242 | 0,019481956 |  |
| 204162_at   | NDC80             | 3,62365843  | 3,604188755 | 0,019469676 |  |
| 222985_at   | YWHAG             | 6,103302238 | 6,083850071 | 0,019452167 |  |
| 228797_at   | NLN               | 1,292162421 | 1,272721751 | 0,01944067  |  |
| 201250_s_at | SLC2A1            | 2,860082603 | 2,840694075 | 0,019388528 |  |
| 200697_at   | HK1               | 5,429154674 | 5,409815321 | 0,019339353 |  |
| 208785_s_at | MAP1LC3B          | 4,426844657 | 4,407512498 | 0,01933216  |  |
| 224377_s_at | RAB18             | 4,253455927 | 4,234134575 | 0,019321352 |  |
| 212363_x_at | ACTG1             | 7,647744611 | 7,628470687 | 0,019273924 |  |
| 211222_s_at | HAP1              | 1,233777334 | 1,214517879 | 0,019259455 |  |
| 229094_at   | ATP6V0E2-AS1      | 1,233777334 | 1,214517879 | 0,019259455 |  |
| 203880_at   | COX17             | 4,032172063 | 4,012941072 | 0,019230991 |  |
| 224359_s_at | HOOK3             | 1,210676994 | 1,191491281 | 0,019185713 |  |
| 201678_s_at | C3orf37           | 3,506195778 | 3,487095824 | 0,019099954 |  |
| 204423_at   | MKLN1             | 2,750626925 | 2,731588328 | 0,019038597 |  |
| 209096_at   | UBE2V2            | 5,331079521 | 5,312055917 | 0,019023603 |  |
| 221920_s_at | SLC25A37          | 3,744388178 | 3,725370335 | 0,019017843 |  |
| 204224_s_at | GCH1              | 2,122398022 | 2,103505212 | 0,01889281  |  |
| 213372_at   | PAQR3             | 3,684447666 | 3,665633845 | 0,018813822 |  |
| 220892_s_at | PSAT1             | 2,683419202 | 2,664608955 | 0,018810247 |  |
| 204641_at   | NEK2              | 3,086335384 | 3,067567462 | 0,018767922 |  |
| 212881_at   | PIAS4             | 2,084778276 | 2,066015817 | 0,018762459 |  |
| 217756_x_at | C15orf63 /// MIR1 | 6,435797263 | 6,417057788 | 0,018739476 |  |
| 208632_at   | RNF10             | 2,077135162 | 2,058399602 | 0,01873556  |  |
| 204458_at   | PLA2G15           | 1,073999308 | 1,055274826 | 0,018724482 |  |
| 213297_at   | RMND5B            | 1,073999308 | 1,055274826 | 0,018724482 |  |
| 227634_at   | STK32C            | 1,073999308 | 1,055274826 | 0,018724482 |  |
| 200927_s_at | RAB14             | 3,875753437 | 3,857048799 | 0,018704637 |  |
| 225855_at   | EPB41L5           | 2,064305961 | 2,045615873 | 0,018690088 |  |
| 218581_at   | ABHD4             | 2,621710292 | 2,603119255 | 0,018591037 |  |
| 218771_at   | PANK4             | 2,030406107 | 2,011838132 | 0,018567975 |  |
| 224584_at   | TMEM230           | 6,387818086 | 6,369250622 | 0,018567465 |  |
| 226274_at   | CLCN5             | 3,833280332 | 3,814728712 | 0,01855162  |  |
| 211787_s_at | EIF4A1 /// SENP3  | 7,54471392  | 7,526179779 | 0,01853414  |  |
| 225155_at   | SNHG5 /// SNOR    | 6,24916556  | 6,230634374 | 0,018531187 |  |
| 201013_s_at | PAICS             | 6,059205849 | 6,040695015 | 0,018510834 |  |
| 202647_s_at | NRAS              | 3,597182555 | 3,578681277 | 0,018501278 |  |
| 238504_at   | C6orf57           | 2,003776245 | 1,98530622  | 0,018470025 |  |
| 1566502_at  | -                 | 0,995078803 | 0,976641161 | 0,018437642 |  |
| 204389_at   | MAOA              | 2,577249059 | 2,558821855 | 0,018427204 |  |
| 218580_x_at | AURKAIP1          | 4,938692955 | 4,920294977 | 0,018397978 |  |
| 203012_x_at | RPL23A            | 8,145431452 | 8,127067399 | 0,018364053 |  |
| 225621_at   | ALG2              | 3,943876123 | 3,925633118 | 0,018243005 |  |
| 214052_x_at | PRRC2C            | 1,940595304 | 1,922365006 | 0,018230297 |  |
| 240344_x_at | LYRM7             | 1,926486359 | 1,908311039 | 0,01817532  |  |
| 212075_s_at | CSNK2A1 /// CSN   | 3,91129185  | 3,893176339 | 0,018115511 |  |
| 217719_at   | EIF3L             | 6,452509245 | 6,434446889 | 0,018062356 |  |

|              |                  |             |             |             |  |
|--------------|------------------|-------------|-------------|-------------|--|
| 212193_s_at  | LARP1            | 2,890927111 | 2,87289275  | 0,01803436  |  |
| 200682_s_at  | UBE2L3           | 5,800038555 | 5,78209163  | 0,017946926 |  |
| 1555996_s_at | EIF4A2 /// MIR12 | 1,868628927 | 1,85068474  | 0,017944186 |  |
| 205562_at    | RPP38            | 2,427005622 | 2,409170778 | 0,017834844 |  |
| 201104_x_at  | LOC100506032 /   | 3,634982121 | 3,617207412 | 0,017774709 |  |
| 1553102_a_at | CCDC69           | 0,822971223 | 0,805216064 | 0,017755159 |  |
| 212482_at    | RMND5A           | 3,812716554 | 3,795004675 | 0,017711878 |  |
| 203972_s_at  | PEX3             | 3,396853889 | 3,379145507 | 0,017708382 |  |
| 217831_s_at  | NSFL1C           | 3,133773173 | 3,116064987 | 0,017708186 |  |
| 218761_at    | RNF111           | 2,81177561  | 2,794067719 | 0,017707892 |  |
| 201548_s_at  | KDM5B            | 3,127619759 | 3,109937707 | 0,017682052 |  |
| 227947_at    | PHACTR2          | 4,591035503 | 4,573447849 | 0,017587654 |  |
| 221012_s_at  | TRIM8            | 4,103509368 | 4,085930792 | 0,017578576 |  |
| 224841_x_at  | GAS5 /// SNORD   | 6,653793515 | 6,636260242 | 0,017533273 |  |
| 211773_s_at  | ZKSCAN3          | 1,767779954 | 1,750261389 | 0,017518565 |  |
| 225460_at    | SEC22C           | 3,088871381 | 3,071356473 | 0,017514908 |  |
| 216215_s_at  | RBFOX2           | 3,082523011 | 3,065035915 | 0,017487096 |  |
| 233749_at    | -                | 1,751865623 | 1,73441697  | 0,017448652 |  |
| 225344_at    | NCOA7            | 6,847725652 | 6,830286602 | 0,017439051 |  |
| 230097_at    | GART             | 2,320980353 | 2,303602088 | 0,017378265 |  |
| 201112_s_at  | CSE1L            | 6,407760362 | 6,390385147 | 0,017375215 |  |
| 228106_at    | DCAF16           | 3,537166687 | 3,519816196 | 0,017350491 |  |
| 210691_s_at  | CACYBP           | 5,020671303 | 5,003461658 | 0,017209645 |  |
| 200834_s_at  | RPS21            | 7,963286258 | 7,946129893 | 0,017156365 |  |
| 218756_s_at  | DHRS11           | 1,67631007  | 1,659204017 | 0,017106054 |  |
| 206907_at    | TNFSF9           | 0,67554678  | 0,658444279 | 0,017102501 |  |
| 203765_at    | GCA              | 2,997346717 | 2,980244813 | 0,017101904 |  |
| 209642_at    | BUB1             | 4,671066265 | 4,653984658 | 0,017081607 |  |
| 235123_at    | -                | 1,666156729 | 1,64909809  | 0,017058638 |  |
| 201729_s_at  | KIAA0100         | 2,983784569 | 2,966746113 | 0,017038456 |  |
| 227322_s_at  | BCCIP            | 4,661301862 | 4,644266013 | 0,017035849 |  |
| 227328_at    | CAMTA1           | 2,243430036 | 2,226407528 | 0,017022508 |  |
| 202275_at    | G6PD             | 1,649074067 | 1,632095957 | 0,01697811  |  |
| 231069_at    | -                | 1,64218396  | 1,6252386   | 0,01694536  |  |
| 200784_s_at  | LRP1             | 0,641402394 | 0,624460759 | 0,016941635 |  |
| 225632_s_at  | ISY1-RAB43 /// R | 0,641402394 | 0,624460759 | 0,016941635 |  |
| 238431_at    | -                | 2,637386731 | 2,620464265 | 0,016922466 |  |
| 208095_s_at  | SRP72            | 4,723824182 | 4,706906619 | 0,016917562 |  |
| 210070_s_at  | CHKB-CPT1B ///   | 0,606430281 | 0,589657387 | 0,016772894 |  |
| 216515_x_at  | -                | 6,791814937 | 6,775063757 | 0,016751179 |  |
| 213761_at    | MDM1             | 3,170152481 | 3,153484076 | 0,016668405 |  |
| 224604_at    | C4orf3           | 4,480461153 | 4,463850559 | 0,016610594 |  |
| 200009_at    | GDI2             | 6,417629071 | 6,401025631 | 0,016603439 |  |
| 219058_x_at  | TINAGL1          | 0,57058931  | 0,553993624 | 0,016595686 |  |
| 219223_at    | CACFD1           | 0,57058931  | 0,553993624 | 0,016595686 |  |
| 229158_at    | WNK4             | 0,57058931  | 0,553993624 | 0,016595686 |  |
| 229517_at    | PTPDC1           | 0,57058931  | 0,553993624 | 0,016595686 |  |
| 227812_at    | TNFRSF19         | 1,560488174 | 1,543943227 | 0,016544947 |  |
| 201827_at    | SMARCD2          | 2,14450783  | 2,127967638 | 0,016540192 |  |
| 219570_at    | KIF16B           | 0,533835206 | 0,51742585  | 0,016409356 |  |
| 243514_at    | -                | 0,533835206 | 0,51742585  | 0,016409356 |  |
| 200641_s_at  | YWHAZ            | 5,814762961 | 5,798376613 | 0,016386348 |  |
| 235716_at    | -                | 1,523472489 | 1,507116528 | 0,016355961 |  |
| 214629_x_at  | RTN4             | 5,766472448 | 5,75014201  | 0,016330438 |  |
| 208821_at    | SNRPB            | 5,619537856 | 5,603246598 | 0,016291258 |  |
| 212791_at    | C1orf216         | 3,095191939 | 3,078904771 | 0,016287168 |  |

|              |                  |             |             |             |  |
|--------------|------------------|-------------|-------------|-------------|--|
| 226044_at    | TDP1             | 1,504602299 | 1,488344553 | 0,016257746 |  |
| 218163_at    | MCTS1            | 4,750097809 | 4,733852814 | 0,016244995 |  |
| 203202_at    | KRR1             | 3,500492568 | 3,484256382 | 0,016236186 |  |
| 233825_s_at  | CD99L2           | 0,496120222 | 0,479907041 | 0,016213181 |  |
| 227072_at    | RTTN             | 2,074578432 | 2,058399602 | 0,01617883  |  |
| 212697_at    | FAM134C          | 2,796341835 | 2,780243895 | 0,01609794  |  |
| 211928_at    | DYNC1H1          | 3,471633352 | 3,455550298 | 0,016083054 |  |
| 224973_at    | FAM46A           | 3,63931383  | 3,623242814 | 0,016071016 |  |
| 1554489_a_at | CEP70            | 1,46610492  | 1,450051551 | 0,01605337  |  |
| 203263_s_at  | ARHGEF9          | 2,771299138 | 2,755336312 | 0,015962826 |  |
| 211951_at    | NOLC1            | 6,576051313 | 6,560102664 | 0,015948649 |  |
| 209566_at    | INSIG2           | 2,027765132 | 2,011838132 | 0,015927    |  |
| 213720_s_at  | SMARCA4          | 6,139225255 | 6,123320246 | 0,015905009 |  |
| 1553704_x_at | ZNF791           | 3,895444023 | 3,879554231 | 0,015889792 |  |
| 238273_at    | C7orf73 /// LOC1 | 1,434549838 | 1,418668082 | 0,015881755 |  |
| 201659_s_at  | ARL1             | 3,421207626 | 3,405399563 | 0,015808063 |  |
| 204544_at    | HPS5             | 2,001086023 | 1,98530622  | 0,015779803 |  |
| 200690_at    | HSPA9            | 3,220746604 | 3,204982027 | 0,015764577 |  |
| 226877_at    | RPL32P3          | 1,394109935 | 1,378453643 | 0,015656292 |  |
| 221002_s_at  | TSPAN14          | 2,710020346 | 2,694398145 | 0,015622202 |  |
| 204478_s_at  | RABIF            | 2,972842302 | 2,957221307 | 0,015620995 |  |
| 228275_at    | LOC100505687     | 1,960118853 | 1,944570415 | 0,015548438 |  |
| 203744_at    | HMGB3            | 3,828735867 | 3,813221015 | 0,015514852 |  |
| 218321_x_at  | STYXL1           | 3,537166687 | 3,521663705 | 0,015502982 |  |
| 218448_at    | C20orf11         | 4,166691359 | 4,151234028 | 0,015457331 |  |
| 222674_at    | C9orf114         | 1,352503698 | 1,337086025 | 0,015417674 |  |
| 212107_s_at  | DHX9             | 3,159334685 | 3,14392006  | 0,015414625 |  |
| 1552868_at   | CIRBP-AS1        | 0,351548291 | 0,336136178 | 0,015412113 |  |
| 213096_at    | TMCC2            | 0,351548291 | 0,336136178 | 0,015412113 |  |
| 218380_at    | LOC728392        | 0,351548291 | 0,336136178 | 0,015412113 |  |
| 239391_at    | FAM120AOS        | 0,351548291 | 0,336136178 | 0,015412113 |  |
| 243075_at    | -                | 0,351548291 | 0,336136178 | 0,015412113 |  |
| 218118_s_at  | TIMM23           | 3,670124012 | 3,654731437 | 0,015392575 |  |
| 229796_at    | SIX4             | 1,932146506 | 1,916759838 | 0,015386668 |  |
| 202911_at    | MSH6             | 4,862929774 | 4,847588869 | 0,015340905 |  |
| 218302_at    | PSENEN           | 4,715232482 | 4,699988715 | 0,015243766 |  |
| 211871_x_at  | GNB5             | 0,30867765  | 0,293518836 | 0,015158814 |  |
| 214014_at    | CDC42EP2         | 0,30867765  | 0,293518836 | 0,015158814 |  |
| 220938_s_at  | GMEB1            | 0,30867765  | 0,293518836 | 0,015158814 |  |
| 239699_s_at  | PMS2P1 /// PMS2  | 0,30867765  | 0,293518836 | 0,015158814 |  |
| 1555790_a_at | TMEM192 /// ZNF  | 3,619279389 | 3,604188755 | 0,015090634 |  |
| 203973_s_at  | CEBPD            | 1,296557217 | 1,281471383 | 0,015085834 |  |
| 219889_at    | FRAT1            | 1,296557217 | 1,281471383 | 0,015085834 |  |
| 208950_s_at  | ALDH7A1          | 1,880387527 | 1,865308541 | 0,015078986 |  |
| 232035_at    | HIST1H4A /// HIS | 5,200861687 | 5,185791503 | 0,015070183 |  |
| 202866_at    | DNAJB12          | 2,614687931 | 2,599625088 | 0,015062843 |  |
| 226434_at    | PPP1R35          | 2,609398637 | 2,594367918 | 0,01503072  |  |
| 214143_x_at  | RPL24            | 7,758762889 | 7,743759232 | 0,015003657 |  |
| 229076_s_at  | -                | 1,274448124 | 1,259496994 | 0,01495113  |  |
| 202868_s_at  | POP4             | 6,315089089 | 6,30016103  | 0,014928058 |  |
| 212077_at    | CALD1            | 1,261018186 | 1,246149888 | 0,014868298 |  |
| 219690_at    | IGFLR1           | 2,582657321 | 2,567790814 | 0,014866507 |  |
| 223100_s_at  | NUDT5            | 4,779830653 | 4,764991833 | 0,01483882  |  |
| 203945_at    | ARG2             | 2,568189989 | 2,553413592 | 0,014776397 |  |
| 208897_s_at  | DDX18            | 4,150394824 | 4,135635705 | 0,014759119 |  |
| 201773_at    | ADNP             | 4,701212708 | 4,686464402 | 0,014748306 |  |

|              |                 |             |             |             |  |
|--------------|-----------------|-------------|-------------|-------------|--|
| 218613_at    | PSD3            | 1,238353345 | 1,223626587 | 0,014726758 |  |
| 213574_s_at  | -               | 4,231245055 | 4,216563145 | 0,01468191  |  |
| 213179_at    | RQCD1           | 3,393780562 | 3,379145507 | 0,014635055 |  |
| 59433_at     | LOC100506453 /  | 0,084173957 | 0,069557789 | 0,014616168 |  |
| 203123_s_at  | SLC11A2         | 1,805273023 | 1,790660532 | 0,014612491 |  |
| 208919_s_at  | NADK            | 3,67603922  | 3,661450356 | 0,014588864 |  |
| 1554903_at   | FRMD8           | 1,215326747 | 1,200746069 | 0,014580678 |  |
| 228043_at    | UTP15           | 1,215326747 | 1,200746069 | 0,014580678 |  |
| 1555039_a_at | ABCC4           | 1,795990708 | 1,781437557 | 0,01455315  |  |
| 219406_at    | C1orf50         | 1,795990708 | 1,781437557 | 0,01455315  |  |
| 201727_s_at  | ELAVL1          | 3,014789032 | 3,000258961 | 0,014530072 |  |
| 214695_at    | UBAP2L          | 1,789769151 | 1,775255987 | 0,014513164 |  |
| 214113_s_at  | RBM8A           | 4,368551674 | 4,354078399 | 0,014473274 |  |
| 217391_x_at  | -               | 1,191926657 | 1,177496821 | 0,014429836 |  |
| 218871_x_at  | CSGALNACT2      | 1,191926657 | 1,177496821 | 0,014429836 |  |
| 236090_at    | -               | 2,506929603 | 2,492544876 | 0,014384727 |  |
| 228690_s_at  | NDUFA11         | 5,896291018 | 5,881925611 | 0,014365407 |  |
| 225156_at    | ELOF1           | 5,605769525 | 5,591420757 | 0,014348769 |  |
| 212083_at    | TEX261          | 2,983784569 | 2,969455976 | 0,014328593 |  |
| 224429_x_at  | -               | 2,758612869 | 2,744302548 | 0,014310321 |  |
| 220935_s_at  | CDK5RAP2        | 1,758252436 | 1,743944487 | 0,014307949 |  |
| 1557059_at   | LOC254128       | 0,171847695 | 0,157549243 | 0,014298453 |  |
| 1558327_at   | ZDHHC18         | 0,171847695 | 0,157549243 | 0,014298453 |  |
| 227982_at    | SEPSECS         | 0,171847695 | 0,157549243 | 0,014298453 |  |
| 229058_at    | ANKRD16         | 1,168140757 | 1,153866761 | 0,014273996 |  |
| 229208_at    | HAUS2           | 1,168140757 | 1,153866761 | 0,014273996 |  |
| 201436_at    | EIF4E           | 3,489018063 | 3,474751011 | 0,014267052 |  |
| 222884_at    | ZNF346          | 1,742232072 | 1,728030156 | 0,014201916 |  |
| 211152_s_at  | HTRA2           | 2,478200152 | 2,464004877 | 0,014195275 |  |
| 201094_at    | RPS29           | 7,860129653 | 7,845934684 | 0,014194969 |  |
| 221267_s_at  | FAM108A1        | 3,467741468 | 3,453616097 | 0,014125371 |  |
| 202070_s_at  | IDH3A           | 2,466546243 | 2,452428893 | 0,01411735  |  |
| 214908_s_at  | TRRAP           | 1,143956113 | 1,129843209 | 0,014112904 |  |
| 228430_at    | BOLA3-AS1       | 1,143956113 | 1,129843209 | 0,014112904 |  |
| 228660_x_at  | SEMA4F          | 1,143956113 | 1,129843209 | 0,014112904 |  |
| 1553588_at   | ND3 /// SH3KBP1 | 8,330596909 | 8,316538669 | 0,01405824  |  |
| 201569_s_at  | SAMM50          | 4,585658616 | 4,571665519 | 0,013993097 |  |
| 220741_s_at  | PPA2            | 4,032830746 | 4,018839599 | 0,013991146 |  |
| 206942_s_at  | PMCH            | 0,123193849 | 0,109221392 | 0,013972457 |  |
| 209310_s_at  | CASP4           | 0,123193849 | 0,109221392 | 0,013972457 |  |
| 216611_s_at  | SLC6A2          | 0,123193849 | 0,109221392 | 0,013972457 |  |
| 229216_s_at  | -               | 0,123193849 | 0,109221392 | 0,013972457 |  |
| 236600_at    | SPG20           | 0,123193849 | 0,109221392 | 0,013972457 |  |
| 218292_s_at  | PRKAG2          | 1,119359127 | 1,105412836 | 0,013946292 |  |
| 200001_at    | CAPNS1          | 5,688357434 | 5,674417    | 0,013940434 |  |
| 201762_s_at  | PSME2           | 5,022330613 | 5,00841113  | 0,013919483 |  |
| 226558_at    | LOC389834 /// M | 2,436992838 | 2,423075926 | 0,013916913 |  |
| 219639_x_at  | PARP6           | 2,691784869 | 2,677924589 | 0,01386028  |  |
| 1554429_a_at | DMWD            | 1,104397092 | 1,090553537 | 0,013843555 |  |
| 212080_at    | MLL             | 1,104397092 | 1,090553537 | 0,013843555 |  |
| 244185_at    | -               | 1,104397092 | 1,090553537 | 0,013843555 |  |
| 225000_at    | PRKAR2A         | 3,687797371 | 3,673964604 | 0,013832767 |  |
| 238538_at    | ANKRD11         | 2,422991296 | 2,409170778 | 0,013820518 |  |
| 204282_s_at  | FARS2           | 2,097427503 | 2,083632167 | 0,013795336 |  |
| 1558914_at   | DESI2           | 1,094335495 | 1,080561626 | 0,013773869 |  |
| 218985_at    | SLC2A8          | 1,094335495 | 1,080561626 | 0,013773869 |  |

|              |                 |              |              |             |  |
|--------------|-----------------|--------------|--------------|-------------|--|
| 230020_at    | NAA38           | 1,094335495  | 1,080561626  | 0,013773869 |  |
| 202162_s_at  | CNOT8           | 3,092667038  | 3,078904771  | 0,013762267 |  |
| 221848_at    | ZGPAT           | 1,079110292  | 1,065442793  | 0,013667499 |  |
| 228669_x_at  | PARP10          | 0,072842263  | 0,059218869  | 0,013623394 |  |
| 232167_at    | SLC2A11         | 0,072842263  | 0,059218869  | 0,013623394 |  |
| 225113_at    | AGPS            | 3,072307152  | 3,058687544  | 0,013619608 |  |
| 201874_at    | MPZL1           | 1,638726528  | 1,6252386    | 0,013487928 |  |
| 210470_x_at  | NONO            | 5,456414609  | 5,442974965  | 0,013439644 |  |
| 235014_at    | LOC147727       | 4,499171087  | 4,485783875  | 0,013387213 |  |
| 219831_at    | CDKL3           | 1,027166904  | 1,013870809  | 0,013296095 |  |
| 232841_at    | -               | 1,027166904  | 1,013870809  | 0,013296095 |  |
| 208113_x_at  | PABPC3          | 7,043008909  | 7,029719849  | 0,01328906  |  |
| 221692_s_at  | MRPL34          | 5,640325313  | 5,627040516  | 0,013284797 |  |
| 203893_at    | TAF9            | 5,112331944  | 5,099052587  | 0,013279357 |  |
| 1554393_a_at | ADC             | 0,020670649  | 0,007421914  | 0,013248736 |  |
| 209119_x_at  | NR2F2           | 0,020670649  | 0,007421914  | 0,013248736 |  |
| 213464_at    | SHC2            | 0,020670649  | 0,007421914  | 0,013248736 |  |
| 227453_at    | UNC13A          | 0,020670649  | 0,007421914  | 0,013248736 |  |
| 240257_at    | SYNJ2           | 0,020670649  | 0,007421914  | 0,013248736 |  |
| 216620_s_at  | ARHGEF10        | 3,341570404  | 3,32832922   | 0,013241184 |  |
| 208971_at    | UROD            | 5,016681155  | 5,003461658  | 0,013219497 |  |
| 217924_at    | C6orf106        | 2,338135744  | 2,324919719  | 0,013216025 |  |
| 218181_s_at  | MAP4K4          | 2,338135744  | 2,324919719  | 0,013216025 |  |
| 228612_at    | LOC100506233    | 2,338135744  | 2,324919719  | 0,013216025 |  |
| 57082_at     | LDLRAP1         | 0,592200562  | 0,579050522  | 0,01315004  |  |
| 211716_x_at  | ARHGDI A        | 2,589836943  | 2,576704359  | 0,013132584 |  |
| 239669_at    | -               | 3,325531666  | 3,312408479  | 0,013123187 |  |
| 209329_x_at  | HIGD2A          | 4,8851678    | 4,872052597  | 0,013115203 |  |
| 238821_at    | CSTF2           | 1,000476627  | 0,987376598  | 0,01310003  |  |
| 213220_at    | BBIP1           | 3,000043914  | 2,986947093  | 0,013096821 |  |
| 202788_at    | MAPKAPK3        | 2,31665944   | 2,303602088  | 0,013057352 |  |
| 209584_x_at  | APOBEC3C        | 3,308224834  | 3,295230443  | 0,012994391 |  |
| 234311_s_at  | GTPBP10         | 2,303618506  | 2,290658654  | 0,012959852 |  |
| 201947_s_at  | CCT2            | 6,701386602  | 6,68848869   | 0,012897912 |  |
| 203034_s_at  | RPL27A /// SNOF | 8,029179258  | 8,016319044  | 0,012860214 |  |
| 202045_s_at  | ARHGAP35        | -0,033456564 | -0,046302147 | 0,012845583 |  |
| 204572_s_at  | PIN4            | -0,033456564 | -0,046302147 | 0,012845583 |  |
| 215296_at    | CDC42BPA        | -0,033456564 | -0,046302147 | 0,012845583 |  |
| 203128_at    | SPTLC2          | 1,549482847  | 1,536652708  | 0,012830139 |  |
| 229304_s_at  | MLF1IP          | 1,549482847  | 1,536652708  | 0,012830139 |  |
| 1555281_x_at | ARMC8           | 2,28383338   | 2,271023131  | 0,012810249 |  |
| 201803_at    | POLR2B          | 5,867963534  | 5,855159624  | 0,01280391  |  |
| 213315_x_at  | CXorf40A        | 2,768138014  | 2,755336312  | 0,012801702 |  |
| 202860_at    | DENND4B         | 2,764969948  | 2,752192409  | 0,012777539 |  |
| 33322_i_at   | SFN             | 2,755423794  | 2,742719384  | 0,01270441  |  |
| 204189_at    | RARG            | 0,945567441  | 0,932882274  | 0,012685168 |  |
| 232106_s_at  | CEP89           | 0,945567441  | 0,932882274  | 0,012685168 |  |
| 222875_at    | DHX33           | 3,388643755  | 3,376085218  | 0,012558537 |  |
| 212228_s_at  | COQ9            | 3,513765154  | 3,501209806  | 0,012555348 |  |
| 235593_at    | ZEB2            | 2,250242994  | 2,237691445  | 0,012551549 |  |
| 1557165_s_at | KLHL18          | 1,512180019  | 1,499637023  | 0,012542996 |  |
| 203916_at    | NDST2           | 1,512180019  | 1,499637023  | 0,012542996 |  |
| 49327_at     | SIRT3           | 2,243430036  | 2,230931691  | 0,012498345 |  |
| 1554316_at   | PGLS            | -0,089689931 | -0,102100538 | 0,012410606 |  |
| 1559654_s_at | -               | -0,089689931 | -0,102100538 | 0,012410606 |  |
| 215161_at    | CAMK1G          | -0,089689931 | -0,102100538 | 0,012410606 |  |



|             |                |              |              |             |  |
|-------------|----------------|--------------|--------------|-------------|--|
| 225868_at   | TRIM47         | -0,089689931 | -0,102100538 | 0,012410606 |  |
| 226565_at   | TMEM99         | -0,089689931 | -0,102100538 | 0,012410606 |  |
| 240746_s_at | -              | -0,089689931 | -0,102100538 | 0,012410606 |  |
| 222701_s_at | CHCHD7         | 4,230671025  | 4,21827299   | 0,012398035 |  |
| 200053_at   | SPAG7          | 3,484209953  | 3,471887144  | 0,012322808 |  |
| 209411_s_at | GGA3           | 1,481627361  | 1,469325098  | 0,012302263 |  |
| 203689_s_at | FMR1           | 2,47626436   | 2,464004877  | 0,012259482 |  |
| 204451_at   | FZD1           | 0,888485433  | 0,876248481  | 0,012236952 |  |
| 207232_s_at | DZIP3          | 0,888485433  | 0,876248481  | 0,012236952 |  |
| 218658_s_at | ACTR8          | 0,888485433  | 0,876248481  | 0,012236952 |  |
| 200893_at   | TRA2B          | 6,58168915   | 6,569454465  | 0,012234684 |  |
| 224162_s_at | FBXO31         | 2,208874124  | 2,196649505  | 0,012224619 |  |
| 202148_s_at | PYCR1          | 3,199783157  | 3,187631636  | 0,012151521 |  |
| 219968_at   | ZNF589         | 1,462198073  | 1,450051551  | 0,012146523 |  |
| 224981_at   | TMEM219        | 2,680059304  | 2,667949403  | 0,012109902 |  |
| 203032_s_at | FH             | 2,190100188  | 2,17802703   | 0,012073157 |  |
| 231847_at   | ANKRD54        | 2,190100188  | 2,17802703   | 0,012073157 |  |
| 220789_s_at | SNORA5B /// TB | 3,453052675  | 3,440980183  | 0,012072492 |  |
| 235509_at   | LOC100506538 / | 4,773538862  | 4,761478085  | 0,012060778 |  |
| 223993_s_at | CNIH4          | 5,111708585  | 5,099671136  | 0,012037449 |  |
| 225441_x_at | LSMD1          | 3,769898242  | 3,757867094  | 0,012031148 |  |
| 218115_at   | ASF1B          | 4,252325187  | 4,24031851   | 0,012006678 |  |
| 1553253_at  | ASB16          | 0,859074518  | 0,847075464  | 0,011999055 |  |
| 243618_s_at | ZNF827         | 1,442503549  | 1,43051703   | 0,011986518 |  |
| 204504_s_at | HIRIP3         | 2,178241192  | 2,166264721  | 0,01197647  |  |
| 236271_at   | -              | -0,148196756 | -0,160136748 | 0,011939992 |  |
| 238819_at   | ZNF347         | -0,148196756 | -0,160136748 | 0,011939992 |  |
| 201674_s_at | AKAP1          | 2,166283906  | 2,154405725  | 0,01187818  |  |
| 238835_at   | AVPR1A         | 2,837639949  | 2,825817328  | 0,01182262  |  |
| 228535_at   | RAD1           | 1,422536444  | 1,410714371  | 0,011822073 |  |
| 203040_s_at | HMBS           | 2,420979937  | 2,409170778  | 0,011809159 |  |
| 213294_at   | EIF2AK2        | 4,000869774  | 3,989102799  | 0,011766975 |  |
| 227041_at   | SESTD1         | 0,82905153   | 0,817300337  | 0,011751194 |  |
| 218039_at   | NUSAP1         | 4,685380613  | 4,673643206  | 0,011737407 |  |
| 225643_at   | MAPK1IP1L      | 4,461505382  | 4,449849671  | 0,011655711 |  |
| 201051_at   | ANP32A         | 5,102639473  | 5,090987226  | 0,011652247 |  |
| 204949_at   | ICAM3          | 5,30704878   | 5,295413712  | 0,011635067 |  |
| 227087_at   | INPP4A         | 2,814842651  | 2,803210557  | 0,011632094 |  |
| 210346_s_at | CLK4           | 2,134723057  | 2,123108223  | 0,011614834 |  |
| 229905_at   | RAP1GDS1       | 1,390002893  | 1,378453643  | 0,01154925  |  |
| 235595_at   | ARHGEF2        | 1,390002893  | 1,378453643  | 0,01154925  |  |
| 211745_x_at | HBA1 /// HBA2  | 5,532907547  | 5,521358749  | 0,011548798 |  |
| 213304_at   | FAM179B        | 3,121439986  | 3,109937707  | 0,011502279 |  |
| 216833_x_at | GYPB           | 0,798390451  | 0,786897721  | 0,01149273  |  |
| 224980_at   | LEMD2          | 0,798390451  | 0,786897721  | 0,01149273  |  |
| 232019_at   | ZKSCAN2        | 1,381753566  | 1,370274469  | 0,011479097 |  |
| 200845_s_at | PRDX6          | 5,883749359  | 5,872274565  | 0,011474793 |  |
| 45633_at    | GINS3          | 3,545960679  | 3,534530441  | 0,011430238 |  |
| 220864_s_at | NDUFA13        | 6,309799654  | 6,298410885  | 0,011388769 |  |
| 225295_at   | SLC39A10       | 3,785615967  | 3,77423254   | 0,011383427 |  |
| 235407_at   | -              | 1,369290453  | 1,3579181    | 0,011372353 |  |
| 201624_at   | DARS           | 4,175069494  | 4,163710704  | 0,01135879  |  |
| 223387_at   | ZFYVE1         | 2,950705598  | 2,939363796  | 0,011341803 |  |
| 1558369_at  | MPHOSPH9       | 2,102456302  | 2,091116676  | 0,011339626 |  |
| 235008_at   | -              | 0,779676066  | 0,768343791  | 0,011332275 |  |
| 241996_at   | -              | 0,779676066  | 0,768343791  | 0,011332275 |  |

|              |                  |             |             |             |  |
|--------------|------------------|-------------|-------------|-------------|--|
| 219326_s_at  | B3GNT2           | 3,22766727  | 3,216434104 | 0,011233165 |  |
| 222777_s_at  | WHSC1            | 0,767063567 | 0,755840599 | 0,011222968 |  |
| 217835_x_at  | C2orf24 /// TGIF | 6,441265426 | 6,430088484 | 0,011176941 |  |
| 230391_at    | CD84             | 2,342392905 | 2,331254065 | 0,01113884  |  |
| 223339_at    | ATPIF1           | 3,072307152 | 3,061230246 | 0,011076906 |  |
| 1556228_a_at | VCPIP1           | 0,747935635 | 0,73688026  | 0,011055375 |  |
| 206672_at    | AQP2             | 0,747935635 | 0,73688026  | 0,011055375 |  |
| 217962_at    | NOP10            | 6,540132993 | 6,529097199 | 0,011035794 |  |
| 219293_s_at  | OLA1             | 5,931156513 | 5,920159511 | 0,010997002 |  |
| 204076_at    | ENTPD4           | 3,325531666 | 3,314541423 | 0,010990243 |  |
| 208289_s_at  | EI24             | 3,642769857 | 3,631821253 | 0,010948604 |  |
| 212961_x_at  | CXorf40B         | 3,056846434 | 3,045906378 | 0,010940056 |  |
| 209680_s_at  | KIFC1            | 3,421207626 | 3,410394103 | 0,010813523 |  |
| 239277_at    | -                | 1,305306849 | 1,294497133 | 0,010809717 |  |
| 207782_s_at  | PSEN1            | 2,716594694 | 2,705818724 | 0,010775971 |  |
| 220172_at    | DCAF17           | 0,715481152 | 0,704715219 | 0,010765932 |  |
| 227627_at    | C8orf44-SGK3 /// | 0,715481152 | 0,704715219 | 0,010765932 |  |
| 208308_s_at  | GPI              | 6,149283408 | 6,138524926 | 0,010758482 |  |
| 200090_at    | FNTA             | 5,758729106 | 5,747973514 | 0,010755592 |  |
| 219029_at    | C5orf28          | 2,030406107 | 2,019703483 | 0,010702625 |  |
| 229744_at    | SSFA2            | 2,030406107 | 2,019703483 | 0,010702625 |  |
| 230077_at    | LOC220729 /// SI | 1,283332461 | 1,272721751 | 0,01061071  |  |
| 233506_at    | -                | 1,283332461 | 1,272721751 | 0,01061071  |  |
| 219356_s_at  | CHMP5            | 4,963779248 | 4,953181111 | 0,010598137 |  |
| 205036_at    | LSM6             | 4,422829883 | 4,412250787 | 0,010579096 |  |
| 205103_at    | C1orf61          | 1,011212064 | 1,000684521 | 0,010527543 |  |
| 201349_at    | SLC9A3R1         | 1,269985355 | 1,259496994 | 0,01048836  |  |
| 214473_x_at  | PMS2P3           | 2,683419202 | 2,672945617 | 0,010473584 |  |
| 203680_at    | PRKAR2B          | 5,726519244 | 5,716057595 | 0,010461649 |  |
| 214527_s_at  | PQBP1            | 5,231023008 | 5,220613974 | 0,010409034 |  |
| 216242_x_at  | POLR2J2 /// POL  | 1,67631007  | 1,665902186 | 0,010407885 |  |
| 206734_at    | JRKL             | 1,990274687 | 1,979940779 | 0,010333908 |  |
| 222734_at    | WARS2            | 1,990274687 | 1,979940779 | 0,010333908 |  |
| 218571_s_at  | CHMP4A           | 3,915583941 | 3,905256463 | 0,010327478 |  |
| 227186_s_at  | MRPL41           | 4,749296484 | 4,73902338  | 0,010273105 |  |
| 223758_s_at  | GTF2H2           | 3,744388178 | 3,734161076 | 0,010227102 |  |
| 203890_s_at  | DAPK3            | 1,233777334 | 1,223626587 | 0,010150746 |  |
| 210130_s_at  | TM7SF2           | 0,648296226 | 0,638150376 | 0,010145849 |  |
| 212879_x_at  | PIAS4            | 1,968405881 | 1,958277216 | 0,010128665 |  |
| 224502_s_at  | KIAA1191         | 3,815781597 | 3,805658807 | 0,01012279  |  |
| 204825_at    | MELK             | 4,855129945 | 4,845008859 | 0,010121087 |  |
| 1560303_at   | FKBP4            | 1,224581536 | 1,214517879 | 0,010063657 |  |
| 202615_at    | GNAQ             | 3,807337009 | 3,797294336 | 0,010042673 |  |
| 210719_s_at  | HMG20B           | 2,804079361 | 2,794067719 | 0,010011642 |  |
| 212002_at    | C1orf144         | 1,954567604 | 1,944570415 | 0,009997189 |  |
| 225831_at    | LUZP1            | 1,954567604 | 1,944570415 | 0,009997189 |  |
| 219590_x_at  | DPH5             | 3,719237563 | 3,709248632 | 0,009988931 |  |
| 214687_x_at  | ALDOA            | 7,114253219 | 7,104277067 | 0,009976152 |  |
| 220797_at    | METTL16          | 1,210676994 | 1,200746069 | 0,009930925 |  |
| 235848_x_at  | -                | 1,210676994 | 1,200746069 | 0,009930925 |  |
| 200747_s_at  | NUMA1            | 1,946200473 | 1,936283387 | 0,009917086 |  |
| 236283_x_at  | LOC646214        | 1,940595304 | 1,930732138 | 0,009863166 |  |
| 213918_s_at  | NIPBL            | 3,319065909 | 3,309203139 | 0,009862771 |  |
| 211672_s_at  | ARPC4            | 3,203298287 | 3,193438316 | 0,009859971 |  |
| 203581_at    | RAB4A /// SPHA   | 3,525045272 | 3,515187047 | 0,009858225 |  |
| 227481_at    | CNKSR3           | 1,201332287 | 1,191491281 | 0,009841006 |  |

|              |                  |             |             |             |  |
|--------------|------------------|-------------|-------------|-------------|--|
| 228790_at    | FAM110B          | 1,201332287 | 1,191491281 | 0,009841006 |  |
| 1554173_at   | CD300LB          | 0,613492853 | 0,603679647 | 0,009813206 |  |
| 219259_at    | SEMA4A           | 0,613492853 | 0,603679647 | 0,009813206 |  |
| 226523_at    | TAGLN            | 0,613492853 | 0,603679647 | 0,009813206 |  |
| 239790_s_at  | -                | 0,613492853 | 0,603679647 | 0,009813206 |  |
| 220254_at    | LRP12            | 1,932146506 | 1,922365006 | 0,009781499 |  |
| 242705_x_at  | LRPAP1           | 1,932146506 | 1,922365006 | 0,009781499 |  |
| 218389_s_at  | APH1A            | 3,780134221 | 3,770352811 | 0,00978141  |  |
| 226881_at    | GRPEL2           | 3,308224834 | 3,298466943 | 0,009757891 |  |
| 222431_at    | SPIN1            | 4,41122478  | 4,401504959 | 0,009719821 |  |
| 217125_at    | -                | 1,187200746 | 1,177496821 | 0,009703926 |  |
| 202318_s_at  | SENP6            | 3,914869478 | 3,905256463 | 0,009613016 |  |
| 210270_at    | RGS6             | 1,177702228 | 1,16809119  | 0,009611037 |  |
| 219927_at    | FCF1             | 1,90937145  | 1,899812471 | 0,009558979 |  |
| 223184_s_at  | AGPAT3           | 3,391728033 | 3,382199319 | 0,009528715 |  |
| 225516_at    | SLC7A2           | 2,901063789 | 2,891586849 | 0,009476941 |  |
| 217821_s_at  | WBP11            | 2,38635068  | 2,376875125 | 0,009475555 |  |
| 208830_s_at  | SUPT6H           | 1,163336153 | 1,153866761 | 0,009469392 |  |
| 1561546_at   | FGD5-AS1         | 0,57782909  | 0,568365095 | 0,009463995 |  |
| 203636_at    | MID1             | 0,57782909  | 0,568365095 | 0,009463995 |  |
| 200713_s_at  | MAPRE1           | 6,339120524 | 6,32979092  | 0,009329604 |  |
| 1555971_s_at | FBXO28           | 3,651373876 | 3,642048499 | 0,009325377 |  |
| 232649_at    | GLDN             | 0,541261317 | 0,532164371 | 0,009096946 |  |
| 1556291_at   | POM121L12        | 1,859746653 | 1,85068474  | 0,009061913 |  |
| 204925_at    | CTNS             | 1,534677255 | 1,525647381 | 0,009029875 |  |
| 209820_s_at  | TBL3             | 1,534677255 | 1,525647381 | 0,009029875 |  |
| 218108_at    | UBR7             | 4,696231843 | 4,687287676 | 0,008944167 |  |
| 204848_x_at  | HBG1 /// HBG2 // | 8,123490517 | 8,114574402 | 0,008916115 |  |
| 216942_s_at  | CD58             | 2,107467633 | 2,098562556 | 0,008905077 |  |
| 224710_at    | NARR /// RAB34   | 3,842326541 | 3,833443169 | 0,008883372 |  |
| 1554126_at   | MSRB3            | 1,515954005 | 1,507116528 | 0,008837478 |  |
| 216060_s_at  | DAAM1            | 3,416167722 | 3,407399455 | 0,008768267 |  |
| 201898_s_at  | UBE2A            | 4,315944589 | 4,307183466 | 0,008761123 |  |
| 204348_s_at  | AK4 /// LOC1005  | 4,315944589 | 4,307183466 | 0,008761123 |  |
| 226148_at    | ZBTB44           | 3,829494273 | 3,820743792 | 0,008750481 |  |
| 203460_s_at  | PSEN1            | 3,312571045 | 3,303845028 | 0,008726017 |  |
| 1556064_at   | LOC284926        | 1,089278259 | 1,080561626 | 0,008716634 |  |
| 1557478_at   | -                | 0,503742507 | 0,495031851 | 0,008710656 |  |
| 243294_at    | ZNF780B          | 0,503742507 | 0,495031851 | 0,008710656 |  |
| 202146_at    | IFRD1            | 4,825404123 | 4,816696246 | 0,008707877 |  |
| 78383_at     | LOC100129250     | 2,08731701  | 2,078620836 | 0,008696174 |  |
| 234111_at    | -                | 2,305800198 | 2,297144887 | 0,008655311 |  |
| 227346_at    | IKZF1            | 2,819431021 | 2,810785576 | 0,008645445 |  |
| 203911_at    | RAP1GAP          | 1,496984567 | 1,488344553 | 0,008640014 |  |
| 211341_at    | POU4F1           | 1,496984567 | 1,488344553 | 0,008640014 |  |
| 201920_at    | SLC20A1          | 6,66414022  | 6,655529249 | 0,008610971 |  |
| 229377_at    | GRTP1            | 2,074578432 | 2,066015817 | 0,008562615 |  |
| 208676_s_at  | PA2G4            | 4,861076493 | 4,852551612 | 0,008524881 |  |
| 211456_x_at  | MT1P2            | 4,801251771 | 4,792797923 | 0,008453849 |  |
| 243759_at    | SCAF4            | 1,063722698 | 1,055274826 | 0,008447872 |  |
| 206302_s_at  | NUDT4 /// NUDT   | 4,148572682 | 4,140152555 | 0,008420127 |  |
| 212987_at    | FBXO9            | 5,257470309 | 5,249050572 | 0,008419736 |  |
| 32137_at     | JAG2             | 1,278897131 | 1,270526026 | 0,008371105 |  |
| 1560156_at   | -                | 0,46522187  | 0,456918297 | 0,008303573 |  |
| 207083_s_at  | CC2D1A           | 0,46522187  | 0,456918297 | 0,008303573 |  |
| 214364_at    | MTERFD2          | 0,46522187  | 0,456918297 | 0,008303573 |  |

|              |                 |             |             |             |  |
|--------------|-----------------|-------------|-------------|-------------|--|
| 217196_s_at  | CAMSAP2         | 0,46522187  | 0,456918297 | 0,008303573 |  |
| 239930_at    | GALNT2          | 0,46522187  | 0,456918297 | 0,008303573 |  |
| 241722_x_at  | -               | 0,46522187  | 0,456918297 | 0,008303573 |  |
| 203981_s_at  | ABCD4           | 2,26825514  | 2,259997914 | 0,008257227 |  |
| 235072_s_at  | KIF13A          | 2,779171778 | 2,770953871 | 0,008217907 |  |
| 222014_x_at  | MTO1            | 3,625406332 | 3,617207412 | 0,00819892  |  |
| 223005_s_at  | TMEM245         | 3,154500615 | 3,146317015 | 0,008183601 |  |
| 219717_at    | DCAF16          | 1,037706275 | 1,029536893 | 0,008169382 |  |
| 212511_at    | PICALM          | 4,205184875 | 4,197041937 | 0,008142938 |  |
| 226771_at    | ATP8B2          | 3,534378463 | 3,526272152 | 0,008106311 |  |
| 222570_at    | NCS1            | 0,44160593  | 0,433557298 | 0,008048632 |  |
| 213473_at    | BRAP            | 2,763383302 | 2,755336312 | 0,008046991 |  |
| 218024_at    | BRP44L          | 3,831767101 | 3,823741953 | 0,008025147 |  |
| 1552610_a_at | JAK1            | 3,024094427 | 3,016072743 | 0,008021684 |  |
| 201692_at    | SIGMAR1         | 3,024094427 | 3,016072743 | 0,008021684 |  |
| 200711_s_at  | SKP1            | 4,192270951 | 4,18426834  | 0,008002611 |  |
| 213037_x_at  | STAU1           | 5,233890179 | 5,226006411 | 0,007883767 |  |
| 225008_at    | ASPH            | 0,425644434 | 0,417770464 | 0,00787397  |  |
| 1555500_s_at | SLC2A4RG        | 1,742232072 | 1,73441697  | 0,007815102 |  |
| 217720_at    | CHCHD2          | 6,361972127 | 6,354166374 | 0,007805753 |  |
| 226011_at    | CCDC12          | 4,166691359 | 4,158970399 | 0,007720961 |  |
| 91952_at     | DCAF15          | 2,92893181  | 2,921282473 | 0,007649337 |  |
| 244044_at    | -               | 4,49104529  | 4,483415907 | 0,007629383 |  |
| 206090_s_at  | DISC1 /// TSNAX | 0,401366113 | 0,393761504 | 0,007604609 |  |
| 207188_at    | CDK3 /// TEN1-C | 0,401366113 | 0,393761504 | 0,007604609 |  |
| 227849_at    | RP9             | 0,401366113 | 0,393761504 | 0,007604609 |  |
| 209515_s_at  | RAB27A          | 2,400710591 | 2,39311332  | 0,007597272 |  |
| 219397_at    | COQ10B          | 3,792633459 | 3,785040604 | 0,007592855 |  |
| 207459_x_at  | GYPB            | 0,984222186 | 0,976641161 | 0,007581025 |  |
| 208769_at    | EIF4EBP2        | 0,984222186 | 0,976641161 | 0,007581025 |  |
| 210813_s_at  | XRCC4           | 0,984222186 | 0,976641161 | 0,007581025 |  |
| 212626_x_at  | HNRNPC /// LOC  | 6,146395059 | 6,138825886 | 0,007569173 |  |
| 223172_s_at  | MTFP1           | 3,396853889 | 3,38929984  | 0,007554049 |  |
| 211563_s_at  | URI1            | 5,254649665 | 5,247097694 | 0,00755197  |  |
| 200055_at    | TAF10           | 3,981211211 | 3,973663955 | 0,007547256 |  |
| 201125_s_at  | ITGB5           | 2,981056773 | 2,973511251 | 0,007545522 |  |
| 218655_s_at  | CWC25           | 1,973904239 | 1,966439221 | 0,007465018 |  |
| 202443_x_at  | NOTCH2          | 3,634982121 | 3,62753841  | 0,007443712 |  |
| 204813_at    | MAPK10          | 0,384950573 | 0,377530647 | 0,007419927 |  |
| 212947_at    | SLC9A8          | 0,384950573 | 0,377530647 | 0,007419927 |  |
| 222045_s_at  | PCIF1           | 0,384950573 | 0,377530647 | 0,007419927 |  |
| 226433_at    | RNF157          | 0,384950573 | 0,377530647 | 0,007419927 |  |
| 232438_at    | EPS15L1         | 0,384950573 | 0,377530647 | 0,007419927 |  |
| 236535_at    | SMC6            | 0,384950573 | 0,377530647 | 0,007419927 |  |
| 219076_s_at  | PXMP2           | 2,190100188 | 2,182705233 | 0,007394955 |  |
| 49329_at     | KLHL22          | 1,381753566 | 1,374369853 | 0,007383714 |  |
| 226668_at    | WDSUB1          | 2,380152406 | 2,372786857 | 0,007365549 |  |
| 216969_s_at  | KIF22           | 1,699726954 | 1,692388143 | 0,007338812 |  |
| 209021_x_at  | ATG13           | 2,696781084 | 2,689475799 | 0,007305285 |  |
| 203067_at    | PDHX            | 4,075012622 | 4,067710529 | 0,007302094 |  |
| 223216_x_at  | FBXO16 /// ZNF3 | 0,95671774  | 0,949447784 | 0,007269956 |  |
| 227256_at    | USP31           | 0,95671774  | 0,949447784 | 0,007269956 |  |
| 218483_s_at  | IFT46           | 2,178241192 | 2,170981159 | 0,007260033 |  |
| 228195_at    | C2orf88         | 2,178241192 | 2,170981159 | 0,007260033 |  |
| 228764_s_at  | MDP1 /// NEDD8  | 2,178241192 | 2,170981159 | 0,007260033 |  |
| 226456_at    | RMI2            | 2,691784869 | 2,684536601 | 0,007248268 |  |

|              |           |             |              |             |  |
|--------------|-----------|-------------|--------------|-------------|--|
| 564_at       | GNA11     | 3,412629284 | 3,405399563  | 0,00722972  |  |
| 203417_at    | MFAP2     | 0,359971644 | 0,352836757  | 0,007134887 |  |
| 213557_at    | -         | 0,359971644 | 0,352836757  | 0,007134887 |  |
| 217040_x_at  | SOX15     | 0,359971644 | 0,352836757  | 0,007134887 |  |
| 226253_at    | LRRC45    | 0,359971644 | 0,352836757  | 0,007134887 |  |
| 233984_at    | -         | 0,359971644 | 0,352836757  | 0,007134887 |  |
| 241268_x_at  | -         | 0,359971644 | 0,352836757  | 0,007134887 |  |
| 218192_at    | IP6K2     | 2,35929703  | 2,352169913  | 0,007127116 |  |
| 232676_x_at  | MYEF2     | 2,166283906 | 2,159161028  | 0,007122878 |  |
| 208718_at    | DDX17     | 5,994320507 | 5,987211837  | 0,00710867  |  |
| 219220_x_at  | MRPS22    | 4,912089092 | 4,904982678  | 0,007106414 |  |
| 215158_s_at  | DEDD      | 2,675004741 | 2,667949403  | 0,007055339 |  |
| 203416_at    | CD53      | 2,352981171 | 2,345926937  | 0,007054234 |  |
| 212702_s_at  | BICD2     | 1,937784532 | 1,930732138  | 0,007052394 |  |
| 207525_s_at  | GIPC1     | 3,600740871 | 3,593688577  | 0,007052294 |  |
| 204067_at    | SUOX      | 1,672933557 | 1,665902186  | 0,007031371 |  |
| 229232_at    | LRRC57    | 1,666156729 | 1,659204017  | 0,006952712 |  |
| 219298_at    | ECHDC3    | 0,928678725 | 0,921731975  | 0,006946749 |  |
| 225565_at    | CREB1     | 0,928678725 | 0,921731975  | 0,006946749 |  |
| 223066_at    | SNAPIN    | 3,66163142  | 3,654731437  | 0,006899983 |  |
| 1557360_at   | LRPPRC    | 2,338135744 | 2,331254065  | 0,006881679 |  |
| 226196_s_at  | IFT43     | 2,338135744 | 2,331254065  | 0,006881679 |  |
| 226813_at    | NTPCR     | 2,338135744 | 2,331254065  | 0,006881679 |  |
| 1565580_s_at | TATDN2    | -0,67289328 | -0,679763839 | 0,006870559 |  |
| 1566927_at   | LINC00527 | -0,67289328 | -0,679763839 | 0,006870559 |  |
| 210030_at    | -         | -0,67289328 | -0,679763839 | 0,006870559 |  |
| 213755_s_at  | -         | -0,67289328 | -0,679763839 | 0,006870559 |  |
| 213866_at    | SAMD14    | -0,67289328 | -0,679763839 | 0,006870559 |  |
| 214049_x_at  | CD7       | -0,67289328 | -0,679763839 | 0,006870559 |  |
| 232043_at    | GNG7      | -0,67289328 | -0,679763839 | 0,006870559 |  |
| 237360_at    | ACTRT2    | -0,67289328 | -0,679763839 | 0,006870559 |  |
| 239463_at    | -         | -0,67289328 | -0,679763839 | 0,006870559 |  |
| 240774_at    | -         | -0,67289328 | -0,679763839 | 0,006870559 |  |
| 208942_s_at  | SEC62     | 4,091545995 | 4,084681583  | 0,006864412 |  |
| 203827_at    | WIPI1     | 1,331241794 | 1,324440845  | 0,006800949 |  |
| 242268_at    | CELF2     | 1,331241794 | 1,324440845  | 0,006800949 |  |
| 225331_at    | CCDC50    | 3,717599787 | 3,710868933  | 0,006730854 |  |
| 202377_at    | LEPROT    | 4,132069007 | 4,125344852  | 0,006724155 |  |
| 233952_s_at  | ZNF295    | 3,569303935 | 3,562619178  | 0,006684757 |  |
| 224807_at    | GRAMD1A   | 2,640847372 | 2,634191677  | 0,006655695 |  |
| 226861_at    | ASB8      | 2,640847372 | 2,634191677  | 0,006655695 |  |
| 218154_at    | GSDMD     | 0,317354302 | 0,310717132  | 0,00663717  |  |
| 1560527_at   | NFE4      | 4,173278271 | 4,166665505  | 0,006612766 |  |
| 1556006_s_at | CSNK1A1   | 0,900083947 | 0,893473268  | 0,006610679 |  |
| 203644_s_at  | MON1B     | 0,900083947 | 0,893473268  | 0,006610679 |  |
| 228759_at    | CREB3L2   | 0,900083947 | 0,893473268  | 0,006610679 |  |
| 208915_s_at  | GGA2      | 2,314494121 | 2,307890888  | 0,006603233 |  |
| 218277_s_at  | DHX40     | 2,635653293 | 2,629059192  | 0,0065941   |  |
| 225297_at    | HAUS1     | 4,065387235 | 4,058831494  | 0,006555741 |  |
| 226259_at    | EXOC6     | 3,69780007  | 3,691304166  | 0,006495905 |  |
| 203667_at    | TBCA      | 6,484280248 | 6,477797627  | 0,006482621 |  |
| 209579_s_at  | MBD4      | 4,551591289 | 4,545117128  | 0,006474161 |  |
| 201934_at    | WDR82     | 5,220798283 | 5,214344813  | 0,00645347  |  |
| 202501_at    | MAPRE2    | 3,76038475  | 3,753943043  | 0,006441707 |  |
| 1564053_a_at | YTHDF3    | 2,470441349 | 2,464004877  | 0,006436472 |  |
| 202968_s_at  | DYRK2     | 0,882651021 | 0,876248481  | 0,00640254  |  |

|              |                  |              |              |             |  |
|--------------|------------------|--------------|--------------|-------------|--|
| 216680_s_at  | EPHB4            | 0,882651021  | 0,876248481  | 0,00640254  |  |
| 48580_at     | CXXC1            | 3,618401983  | 3,612014038  | 0,006387945 |  |
| 1554767_s_at | CRYZL1           | 1,880387527  | 1,874012195  | 0,006375332 |  |
| 223701_s_at  | USP47            | 2,614687931  | 2,608344689  | 0,006343242 |  |
| 219299_at    | TRMT12           | 3,45992606   | 3,453616097  | 0,006309963 |  |
| 1568597_at   | LOC646762        | 2,609398637  | 2,603119255  | 0,006279383 |  |
| 212340_at    | YIPF6            | 1,603688695  | 1,59747851   | 0,006210184 |  |
| 223083_s_at  | EGLN2 /// RAB4E  | 1,865674241  | 1,859476797  | 0,006197444 |  |
| 235114_x_at  | HOOK3            | 1,865674241  | 1,859476797  | 0,006197444 |  |
| 228487_s_at  | RREB1            | 3,085065712  | 3,078904771  | 0,006160941 |  |
| 1562641_at   | FAM122C          | 0,273439642  | 0,26733076   | 0,006108882 |  |
| 219205_at    | SRR              | 0,273439642  | 0,26733076   | 0,006108882 |  |
| 227738_s_at  | ARMC5            | 0,273439642  | 0,26733076   | 0,006108882 |  |
| 242996_at    | MTRF1            | 0,273439642  | 0,26733076   | 0,006108882 |  |
| 212581_x_at  | GAPDH            | 7,896140746  | 7,890068656  | 0,00607209  |  |
| 238677_at    | WDR36            | 2,077135162  | 2,071071048  | 0,006064114 |  |
| 235235_s_at  | PATL1            | 0,853119696  | 0,847075464  | 0,006044232 |  |
| 215016_x_at  | DST /// LOC1006  | 2,266015882  | 2,259997914  | 0,006017969 |  |
| 212098_at    | MGAT5            | 4,123436638  | 4,117425547  | 0,006011091 |  |
| 218361_at    | GOLPH3L          | 3,653945107  | 3,647981081  | 0,005964026 |  |
| 1559646_a_at | LINC00184        | -0,759588698 | -0,765504029 | 0,005915331 |  |
| 1570105_at   | -                | -0,759588698 | -0,765504029 | 0,005915331 |  |
| 201261_x_at  | BGN              | -0,759588698 | -0,765504029 | 0,005915331 |  |
| 206313_at    | HLA-DOA          | -0,759588698 | -0,765504029 | 0,005915331 |  |
| 210760_x_at  | TRIP11           | -0,759588698 | -0,765504029 | 0,005915331 |  |
| 211845_at    | PVRL1            | -0,759588698 | -0,765504029 | 0,005915331 |  |
| 221065_s_at  | CHST8            | -0,759588698 | -0,765504029 | 0,005915331 |  |
| 228076_s_at  | NOL6             | -0,759588698 | -0,765504029 | 0,005915331 |  |
| 231454_at    | PLAC4            | -0,759588698 | -0,765504029 | 0,005915331 |  |
| 238892_at    | -                | -0,759588698 | -0,765504029 | 0,005915331 |  |
| 242567_at    | ABTB1            | -0,759588698 | -0,765504029 | 0,005915331 |  |
| 201225_s_at  | SRRM1            | 5,323562354  | 5,317649548  | 0,005912806 |  |
| 202717_s_at  | CDC16            | 3,716780201  | 3,710868933  | 0,005911268 |  |
| 1554483_at   | TMEM37           | 1,578645857  | 1,572742379  | 0,005903478 |  |
| 212281_s_at  | TMEM97           | 4,779830653  | 4,773932724  | 0,00589793  |  |
| 203206_at    | FAM53B           | 0,841135803  | 0,835239052  | 0,005896751 |  |
| 225275_at    | EDIL3            | 0,841135803  | 0,835239052  | 0,005896751 |  |
| 235553_at    | GAPVD1           | 0,841135803  | 0,835239052  | 0,005896751 |  |
| 214452_at    | BCAT1            | 0,255492549  | 0,249604176  | 0,005888373 |  |
| 224835_at    | GPCPD1           | 2,254767157  | 2,248887791  | 0,005879367 |  |
| 209225_x_at  | TNPO1            | 3,839317436  | 3,833443169  | 0,005874267 |  |
| 213694_at    | RSBN1            | 2,834621043  | 2,828804976  | 0,005816067 |  |
| 219066_at    | PPCDC            | 2,834621043  | 2,828804976  | 0,005816067 |  |
| 217865_at    | RNF130           | 3,330897748  | 3,325159096  | 0,005738652 |  |
| 201752_s_at  | ADD3             | 3,634982121  | 3,629253073  | 0,005729048 |  |
| 218145_at    | TRIB3            | 2,827046023  | 2,821324225  | 0,005721798 |  |
| 238704_at    | -                | 0,822971223  | 0,817300337  | 0,005670886 |  |
| 211983_x_at  | ACTG1            | 7,834102201  | 7,828432519  | 0,005669682 |  |
| 225126_at    | MRRF             | 2,236584753  | 2,230931691  | 0,005653061 |  |
| 222467_s_at  | PPP6R3           | 3,988699475  | 3,983081173  | 0,005618302 |  |
| 1559989_at   | TPM4             | 0,228146222  | 0,222599095  | 0,005547127 |  |
| 206823_at    | L3MBTL1          | 0,228146222  | 0,222599095  | 0,005547127 |  |
| 207131_x_at  | GGT1 /// GGT2 // | 0,228146222  | 0,222599095  | 0,005547127 |  |
| 209794_at    | SRGAP3           | 0,228146222  | 0,222599095  | 0,005547127 |  |
| 231181_at    | -                | 0,228146222  | 0,222599095  | 0,005547127 |  |
| 201802_at    | SLC29A1          | 1,549482847  | 1,543943227  | 0,005539619 |  |

|              |                 |              |              |             |  |
|--------------|-----------------|--------------|--------------|-------------|--|
| 228006_at    | PTEN            | 1,549482847  | 1,543943227  | 0,005539619 |  |
| 224804_s_at  | FAM219B         | 2,225103271  | 2,21959457   | 0,005508701 |  |
| 223819_x_at  | COMMD5          | 3,923419763  | 3,917937882  | 0,00548188  |  |
| 222390_at    | WAC             | 5,073485277  | 5,068098141  | 0,005387136 |  |
| 200851_s_at  | IST1            | 4,858849409  | 4,853468768  | 0,005380641 |  |
| 203977_at    | TAZ             | 0,209623097  | 0,204310755  | 0,005312342 |  |
| 226798_at    | BCL2L13         | 0,209623097  | 0,204310755  | 0,005312342 |  |
| 228298_at    | PCED1B          | 0,209623097  | 0,204310755  | 0,005312342 |  |
| 239256_at    | -               | 0,209623097  | 0,204310755  | 0,005312342 |  |
| 212473_s_at  | MICAL2          | 6,040658973  | 6,035370383  | 0,00528859  |  |
| 225215_s_at  | MTRF1L          | 3,792633459  | 3,787346121  | 0,005287338 |  |
| 211913_s_at  | MERTK           | 0,792179257  | 0,786897721  | 0,005281535 |  |
| 226713_at    | CCDC50          | 0,792179257  | 0,786897721  | 0,005281535 |  |
| 212173_at    | AK2             | 2,206540699  | 2,201267805  | 0,005272895 |  |
| 226541_at    | FBXO30          | 3,96128107   | 3,956010056  | 0,005271014 |  |
| 1562553_at   | -               | -3,342483913 | -3,347710726 | 0,005226813 |  |
| 207090_x_at  | ZFP30           | 2,371846398  | 2,366632651  | 0,005213747 |  |
| 218602_s_at  | HAUS6           | 2,201862497  | 2,196649505  | 0,005212992 |  |
| 221851_at    | DCAF15          | 1,523472489  | 1,518263577  | 0,005208912 |  |
| 200880_at    | DNAJA1          | 5,328667557  | 5,323486373  | 0,005181185 |  |
| 225391_at    | LOC93622        | 3,102740237  | 3,09760452   | 0,005135717 |  |
| 208912_s_at  | CNP             | 3,779349411  | 3,77423254   | 0,005116871 |  |
| 229028_s_at  | ARL17A /// ARL1 | 1,512180019  | 1,507116528  | 0,005063491 |  |
| 214771_x_at  | MPRIIP          | 2,889473182  | 2,884425449  | 0,005047733 |  |
| 213061_s_at  | NTAN1           | 2,182996494  | 2,17802703   | 0,004969464 |  |
| 213117_at    | KLHL9           | 2,182996494  | 2,17802703   | 0,004969464 |  |
| 213822_s_at  | UBE3B           | 1,990274687  | 1,98530622   | 0,004968467 |  |
| 235985_at    | -               | 1,504602299  | 1,499637023  | 0,004965276 |  |
| 220984_s_at  | SLCO5A1         | 0,181384709  | 0,176436073  | 0,004948636 |  |
| 233528_s_at  | GATSL3          | 0,181384709  | 0,176436073  | 0,004948636 |  |
| 234026_at    | LOC100287177    | 0,181384709  | 0,176436073  | 0,004948636 |  |
| 212449_s_at  | LYPLA1          | 5,764887454  | 5,759957937  | 0,004929517 |  |
| 202584_at    | NFX1            | 1,764611101  | 1,759685182  | 0,004925919 |  |
| 1562892_at   | CHCHD5          | -0,85085127  | -0,855751026 | 0,004899756 |  |
| 207536_s_at  | TNFRSF9         | -0,85085127  | -0,855751026 | 0,004899756 |  |
| 211165_x_at  | EPHB2           | -0,85085127  | -0,855751026 | 0,004899756 |  |
| 216285_at    | DGCR14 /// TSS  | -0,85085127  | -0,855751026 | 0,004899756 |  |
| 229995_at    | SYCN            | -0,85085127  | -0,855751026 | 0,004899756 |  |
| 230745_s_at  | TOX3            | -0,85085127  | -0,855751026 | 0,004899756 |  |
| 231691_at    | C3P1            | -0,85085127  | -0,855751026 | 0,004899756 |  |
| 232153_at    | SPEG            | -0,85085127  | -0,855751026 | 0,004899756 |  |
| 236127_at    | -               | -0,85085127  | -0,855751026 | 0,004899756 |  |
| 240323_at    | -               | -0,85085127  | -0,855751026 | 0,004899756 |  |
| 240909_at    | -               | -0,85085127  | -0,855751026 | 0,004899756 |  |
| 242553_at    | ABCC3           | -0,85085127  | -0,855751026 | 0,004899756 |  |
| 243340_at    | -               | -0,85085127  | -0,855751026 | 0,004899756 |  |
| 1552528_at   | C21orf67        | 0,760715727  | 0,755840599  | 0,004875127 |  |
| 233924_s_at  | EXOC6           | 2,497416546  | 2,492544876  | 0,00487167  |  |
| 1552477_a_at | IRF6            | 2,874852734  | 2,869995113  | 0,004857621 |  |
| 218138_at    | MKKS            | 2,874852734  | 2,869995113  | 0,004857621 |  |
| 232760_at    | TEX15           | 2,874852734  | 2,869995113  | 0,004857621 |  |
| 202396_at    | TCERG1          | 4,817780426  | 4,812929194  | 0,004851232 |  |
| 210831_s_at  | PTGER3          | 1,493160564  | 1,488344553  | 0,004816011 |  |
| 200634_at    | PFN1            | 6,737796535  | 6,733023681  | 0,004772854 |  |
| 200793_s_at  | ACO2            | 3,072307152  | 3,067567462  | 0,00473969  |  |
| 208787_at    | MRPL3           | 6,373978588  | 6,369250622  | 0,004727966 |  |

|              |                |              |              |             |  |
|--------------|----------------|--------------|--------------|-------------|--|
| 228357_at    | UNK            | 3,742778722  | 3,738139229  | 0,004639493 |  |
| 202483_s_at  | RANBP1         | 5,7855532    | 5,780935126  | 0,004618074 |  |
| 214271_x_at  | RPL12          | 6,925246493  | 6,920660727  | 0,004585766 |  |
| 221478_at    | BNIP3L         | 5,08337493   | 5,078804007  | 0,004570923 |  |
| 203293_s_at  | LMAN1          | 1,473887017  | 1,469325098  | 0,004561919 |  |
| 224486_s_at  | C15orf41       | 3,056846434  | 3,052311115  | 0,004535319 |  |
| 219004_s_at  | MIS18A         | 3,904829675  | 3,900294538  | 0,004535137 |  |
| 219061_s_at  | LAGE3          | 3,734704399  | 3,730171924  | 0,004532476 |  |
| 211504_x_at  | ROCK2          | 0,728550685  | 0,724100169  | 0,004450516 |  |
| 226578_s_at  | DUSP1          | 0,728550685  | 0,724100169  | 0,004450516 |  |
| 212455_at    | YTHDC1         | 4,757289776  | 4,752852722  | 0,004437055 |  |
| 203050_at    | TP53BP1        | 3,786397376  | 3,781960839  | 0,004436537 |  |
| 218768_at    | NUP107         | 4,974790208  | 4,970362234  | 0,004427974 |  |
| 225731_at    | ANKRD50        | 3,046446467  | 3,042049843  | 0,004396624 |  |
| 1553262_a_at | UTS2R          | 1,722769813  | 1,718396606  | 0,004373208 |  |
| 213356_x_at  | HNRNPA1 /// HN | 7,533819819  | 7,529483243  | 0,004336576 |  |
| 1562409_s_at | -              | 0,133056859  | 0,128747141  | 0,004309718 |  |
| 219330_at    | VANGL1         | 0,133056859  | 0,128747141  | 0,004309718 |  |
| 220095_at    | CNTLN          | 0,133056859  | 0,128747141  | 0,004309718 |  |
| 222050_at    | -              | 0,133056859  | 0,128747141  | 0,004309718 |  |
| 243579_at    | MSI2           | 0,133056859  | 0,128747141  | 0,004309718 |  |
| 222444_at    | ARMCX3         | 1,454352496  | 1,450051551  | 0,004300946 |  |
| 221063_x_at  | RNF123         | 1,446464021  | 1,442269454  | 0,004194567 |  |
| 213793_s_at  | HOMER1         | 3,123915073  | 3,119728903  | 0,00418617  |  |
| 221727_at    | SUB1           | 3,582860873  | 3,578681277  | 0,004179597 |  |
| 219918_s_at  | ASPM           | 4,208686884  | 4,204537151  | 0,004149733 |  |
| 1561243_at   | TMEM105        | 1,119359127  | 1,115234684  | 0,004124443 |  |
| 218148_at    | CENPT          | 1,119359127  | 1,115234684  | 0,004124443 |  |
| 241724_x_at  | -              | 1,119359127  | 1,115234684  | 0,004124443 |  |
| 204234_s_at  | ZNF195         | 1,926486359  | 1,922365006  | 0,004121353 |  |
| 215215_s_at  | LOC81691       | 1,926486359  | 1,922365006  | 0,004121353 |  |
| 208296_x_at  | TNFAIP8        | 4,6074892    | 4,603415342  | 0,004073858 |  |
| 214062_x_at  | NFKBIB         | 2,28383338   | 2,27978304   | 0,00405034  |  |
| 220086_at    | IKZF5          | 1,434549838  | 1,43051703   | 0,004032808 |  |
| 221100_at    | C6orf15        | 0,695652136  | 0,691645685  | 0,004006451 |  |
| 218159_at    | DDR GK1        | 3,017453847  | 3,013449121  | 0,004004726 |  |
| 225074_at    | RAB2B          | 3,749205801  | 3,745272377  | 0,003933424 |  |
| 202693_s_at  | STK17A         | 3,495722611  | 3,491815843  | 0,003906767 |  |
| 215884_s_at  | UBQLN2         | 3,95851035   | 3,954643074  | 0,003867276 |  |
| 1554044_a_at | MRAP           | -0,946847173 | -0,950686014 | 0,003838841 |  |
| 1560476_at   | -              | -0,946847173 | -0,950686014 | 0,003838841 |  |
| 214732_at    | SP1            | -0,946847173 | -0,950686014 | 0,003838841 |  |
| 228094_at    | AMICA1         | -0,946847173 | -0,950686014 | 0,003838841 |  |
| 236547_at    | -              | -0,946847173 | -0,950686014 | 0,003838841 |  |
| 238610_s_at  | -              | -0,946847173 | -0,950686014 | 0,003838841 |  |
| 242944_at    | FAM83A         | -0,946847173 | -0,950686014 | 0,003838841 |  |
| 244229_at    | PARVG          | -0,946847173 | -0,950686014 | 0,003838841 |  |
| 244466_at    | ZNF544         | -0,946847173 | -0,950686014 | 0,003838841 |  |
| 244729_at    | -              | -0,946847173 | -0,950686014 | 0,003838841 |  |
| 227144_at    | KIAA0930       | 0,67554678   | 0,67181667   | 0,00373011  |  |
| 231002_s_at  | -              | 0,67554678   | 0,67181667   | 0,00373011  |  |
| 209001_s_at  | ANAPC13        | 4,579810951  | 4,576117222  | 0,003693729 |  |
| 214274_s_at  | ACAA1          | 3,406034785  | 3,402394519  | 0,003640266 |  |
| 205601_s_at  | HOXB5          | 0,083054335  | 0,079428135  | 0,0036262   |  |
| 231005_at    | -              | 0,083054335  | 0,079428135  | 0,0036262   |  |
| 35201_at     | HNRNPL         | 5,137966674  | 5,134346191  | 0,003620483 |  |



|              |                  |              |              |             |  |
|--------------|------------------|--------------|--------------|-------------|--|
| 202094_at    | BIRC5            | 3,082523011  | 3,078904771  | 0,00361824  |  |
| 220015_at    | CASZ1            | 1,40228911   | 1,398700978  | 0,003588131 |  |
| 223490_s_at  | EXOSC3           | 3,780134221  | 3,77655538   | 0,003578841 |  |
| 208361_s_at  | POLR3D           | 2,779171778  | 2,775606361  | 0,003565417 |  |
| 209204_at    | LMO4             | 0,661985843  | 0,658444279  | 0,003541563 |  |
| 228330_at    | ZUFSP            | 3,074867907  | 3,071356473  | 0,003511434 |  |
| 45572_s_at   | GGA1             | 3,979503898  | 3,976024028  | 0,00347987  |  |
| 212886_at    | CCDC69           | 1,394109935  | 1,390636111  | 0,003473824 |  |
| 201994_at    | MORF4L2          | 6,317929234  | 6,314485986  | 0,003443248 |  |
| 208863_s_at  | SRSF1            | 5,317628408  | 5,314189382  | 0,003439026 |  |
| 223583_at    | TNFAIP8L2        | 2,069451339  | 2,066015817  | 0,003435522 |  |
| 216396_s_at  | EI24             | 4,107892039  | 4,104540277  | 0,003351762 |  |
| 33768_at     | DMWD             | 1,761435272  | 1,758118818  | 0,003316454 |  |
| 231806_s_at  | STK36            | 1,381753566  | 1,378453643  | 0,003299923 |  |
| 228650_at    | -                | 2,380152406  | 2,376875125  | 0,003277281 |  |
| 204770_at    | TAP2             | 0,641402394  | 0,638150376  | 0,003252018 |  |
| 213215_at    | AP3S2 /// C15orf | 0,641402394  | 0,638150376  | 0,003252018 |  |
| 212602_at    | WDFY3            | 1,373456798  | 1,370274469  | 0,003182329 |  |
| 224207_x_at  | MMP28            | 1,373456798  | 1,370274469  | 0,003182329 |  |
| 225559_at    | C3orf19          | 1,373456798  | 1,370274469  | 0,003182329 |  |
| 202778_s_at  | ZMYM2            | 3,51093129   | 3,507749374  | 0,003181916 |  |
| 229323_at    | LOC387723        | 0,627515113  | 0,624460759  | 0,003054354 |  |
| 219798_s_at  | MEPCE            | 3,434229569  | 3,431184377  | 0,003045192 |  |
| 224596_at    | SLC44A1          | 2,846658948  | 2,843651104  | 0,003007844 |  |
| 227689_at    | ZNF227           | 2,846658948  | 2,843651104  | 0,003007844 |  |
| 201395_at    | RBM5             | 4,08266696   | 4,079673902  | 0,002993059 |  |
| 212202_s_at  | TMEM87A          | 2,945117939  | 2,942125533  | 0,002992406 |  |
| 219578_s_at  | CPEB1            | 1,844820248  | 1,841838775  | 0,002981473 |  |
| 214662_at    | WDR43            | 3,354274239  | 3,351366359  | 0,00290788  |  |
| 229146_at    | C7orf31          | 0,03125738   | 0,028364014  | 0,002893366 |  |
| 233867_at    | -                | 0,03125738   | 0,028364014  | 0,002893366 |  |
| 218107_at    | WDR26            | 4,519522578  | 4,516682156  | 0,002840422 |  |
| 215806_x_at  | TARP /// TRGC2   | 3,348994562  | 3,346162854  | 0,002831709 |  |
| 200833_s_at  | LOC100506390 /   | 7,312292598  | 7,309496854  | 0,002795744 |  |
| 224878_at    | UBFD1            | 3,608715137  | 3,605931378  | 0,002783759 |  |
| 209235_at    | CLCN7            | 1,829737795  | 1,826973888  | 0,002763907 |  |
| 1557626_at   | -                | -1,047650486 | -1,050406615 | 0,002756129 |  |
| 1557850_at   | INHBA-AS1        | -1,047650486 | -1,050406615 | 0,002756129 |  |
| 1561886_a_at | -                | -1,047650486 | -1,050406615 | 0,002756129 |  |
| 1562289_at   | -                | -1,047650486 | -1,050406615 | 0,002756129 |  |
| 1570568_at   | LOC100130502     | -1,047650486 | -1,050406615 | 0,002756129 |  |
| 205971_s_at  | CTRB1 /// CTRB2  | -1,047650486 | -1,050406615 | 0,002756129 |  |
| 207907_at    | TNFSF14          | -1,047650486 | -1,050406615 | 0,002756129 |  |
| 214511_x_at  | FCGR1B           | -1,047650486 | -1,050406615 | 0,002756129 |  |
| 214664_at    | PAICS            | -1,047650486 | -1,050406615 | 0,002756129 |  |
| 216936_at    | -                | -1,047650486 | -1,050406615 | 0,002756129 |  |
| 222296_at    | -                | -1,047650486 | -1,050406615 | 0,002756129 |  |
| 237207_at    | -                | -1,047650486 | -1,050406615 | 0,002756129 |  |
| 238839_at    | OTX1             | -1,047650486 | -1,050406615 | 0,002756129 |  |
| 241684_at    | -                | -1,047650486 | -1,050406615 | 0,002756129 |  |
| 243051_at    | CNIH4            | -1,047650486 | -1,050406615 | 0,002756129 |  |
| 244051_at    | -                | -1,047650486 | -1,050406615 | 0,002756129 |  |
| 213682_at    | NUP50            | 4,692484877  | 4,689754684  | 0,002730193 |  |
| 226486_at    | MTERFD2          | 1,339784194  | 1,337086025  | 0,002698169 |  |
| 201912_s_at  | GSPT1            | 4,74085559   | 4,738229113  | 0,002626476 |  |
| 221430_s_at  | RNF146           | 1,593009234  | 1,590454215  | 0,002555019 |  |

|              |                  |              |              |             |  |
|--------------|------------------|--------------|--------------|-------------|--|
| 201219_at    | CTBP2            | 0,592200562  | 0,589657387  | 0,002543175 |  |
| 207440_at    | SLC35A2          | 0,592200562  | 0,589657387  | 0,002543175 |  |
| 213248_at    | LOC730101        | 0,592200562  | 0,589657387  | 0,002543175 |  |
| 209141_at    | UBE2G1           | 4,248360607  | 4,245917359  | 0,002443248 |  |
| 203109_at    | UBE2M            | 4,906708939  | 4,904274741  | 0,002434197 |  |
| 219448_at    | TMEM70           | 1,318332599  | 1,315948728  | 0,002383871 |  |
| 209020_at    | C20orf111        | 2,31665944   | 2,314300277  | 0,002359162 |  |
| 217976_s_at  | DYNC1LI1         | 2,310153708  | 2,307890888  | 0,00226282  |  |
| 218122_s_at  | SENP2            | 2,310153708  | 2,307890888  | 0,00226282  |  |
| 202505_at    | SNRPB2           | 6,142738335  | 6,140480048  | 0,002258287 |  |
| 219027_s_at  | MYO9A            | 1,987559146  | 1,98530622   | 0,002252926 |  |
| 1558236_at   | -                | 0,57058931   | 0,568365095  | 0,002224215 |  |
| 205938_at    | PPM1E            | 0,57058931   | 0,568365095  | 0,002224215 |  |
| 206044_s_at  | BRAF             | 0,57058931   | 0,568365095  | 0,002224215 |  |
| 227755_at    | -                | 0,57058931   | 0,568365095  | 0,002224215 |  |
| 243707_at    | -                | 0,57058931   | 0,568365095  | 0,002224215 |  |
| 204510_at    | CDC7             | 3,148435161  | 3,146317015  | 0,002118146 |  |
| 211166_at    | FAM153A          | -0,022466681 | -0,024572586 | 0,002105906 |  |
| 243731_at    | -                | -0,022466681 | -0,024572586 | 0,002105906 |  |
| 243976_at    | -                | -0,022466681 | -0,024572586 | 0,002105906 |  |
| 210053_at    | TAF5             | 3,498586477  | 3,496520471  | 0,002066007 |  |
| 222729_at    | FBXW7            | 1,556829052  | 1,55481039   | 0,002018661 |  |
| 226166_x_at  | STK36            | 1,556829052  | 1,55481039   | 0,002018661 |  |
| 201229_s_at  | ARIH2            | 2,292660284  | 2,290658654  | 0,00200163  |  |
| 225455_at    | TADA1            | 2,55541096   | 2,553413592  | 0,001997368 |  |
| 228334_x_at  | CEP44            | 2,55541096   | 2,553413592  | 0,001997368 |  |
| 65770_at     | RHOT2            | 2,724770722  | 2,722781848  | 0,001988874 |  |
| 226610_at    | CENPV            | 3,875753437  | 3,873779903  | 0,001973534 |  |
| 201490_s_at  | PPIF             | 3,612245157  | 3,61027875   | 0,001966406 |  |
| 222400_s_at  | ADI1             | 5,522158161  | 5,52020409   | 0,001954072 |  |
| 200933_x_at  | RPS4X            | 7,793284449  | 7,791342925  | 0,001941524 |  |
| 225229_at    | AFF4             | 3,133773173  | 3,131875186  | 0,001897988 |  |
| 201508_at    | IGFBP4           | 0,962260738  | 0,960386719  | 0,001874019 |  |
| 226605_at    | DGKQ             | 0,962260738  | 0,960386719  | 0,001874019 |  |
| 235472_at    | FUT10            | 0,962260738  | 0,960386719  | 0,001874019 |  |
| 239300_at    | PIK3C3           | 0,962260738  | 0,960386719  | 0,001874019 |  |
| 234295_at    | DBR1             | 2,420979937  | 2,419116683  | 0,001863253 |  |
| 201253_s_at  | CDIPT            | 4,224629877  | 4,222822694  | 0,001807183 |  |
| 202361_at    | SEC24C           | 2,864529541  | 2,862725455  | 0,001804086 |  |
| 1556613_s_at | DPY19L4          | 2,658027143  | 2,656223838  | 0,001803305 |  |
| 209132_s_at  | COMMD4           | 3,80887607   | 3,807174423  | 0,001701647 |  |
| 1555653_at   | -                | 6,298888458  | 6,297198001  | 0,001690458 |  |
| 208406_s_at  | GRAP2            | 0,533835206  | 0,532164371  | 0,001670836 |  |
| 78047_s_at   | -                | 2,034358528  | 2,032717854  | 0,001640674 |  |
| 242617_at    | TMED8            | 2,531373922  | 2,529740643  | 0,001633279 |  |
| 218545_at    | CCDC91           | 2,261526912  | 2,259997914  | 0,001528998 |  |
| 209994_s_at  | ABCB1 /// ABCB4  | 1,261018186  | 1,259496994  | 0,001521191 |  |
| 227249_at    | NDE1             | 3,024094427  | 3,022611001  | 0,001483426 |  |
| 208679_s_at  | ARPC2            | 5,900447459  | 5,898994315  | 0,001453144 |  |
| 203950_s_at  | CLCN6            | 0,934330293  | 0,932882274  | 0,001448019 |  |
| 235126_at    | FLVCR1-AS1       | 0,934330293  | 0,932882274  | 0,001448019 |  |
| 213558_at    | PCLO             | 0,518867317  | 0,51742585   | 0,001441467 |  |
| 239793_at    | -                | 0,518867317  | 0,51742585   | 0,001441467 |  |
| 214937_x_at  | PCM1             | 5,101070055  | 5,099671136  | 0,001398919 |  |
| 218567_x_at  | DPP3             | 2,929639344  | 2,928263672  | 0,001375672 |  |
| 213310_at    | EIF2C2 /// LOC28 | 1,735773781  | 1,73441697   | 0,001356811 |  |

|              |                  |              |              |             |  |
|--------------|------------------|--------------|--------------|-------------|--|
| 212563_at    | BOP1             | 4,092178125  | 4,090916839  | 0,001261286 |  |
| 1557700_at   | POLH             | -0,078265071 | -0,079522948 | 0,001257877 |  |
| 1563318_s_at | MAGIX            | -0,078265071 | -0,079522948 | 0,001257877 |  |
| 1565697_at   | -                | -0,078265071 | -0,079522948 | 0,001257877 |  |
| 1566700_at   | VRK3             | -0,078265071 | -0,079522948 | 0,001257877 |  |
| 222282_at    | -                | -0,078265071 | -0,079522948 | 0,001257877 |  |
| 229141_at    | SFT2D3 /// WDR   | -0,078265071 | -0,079522948 | 0,001257877 |  |
| 239911_at    | ONECUT2          | -0,078265071 | -0,079522948 | 0,001257877 |  |
| 226843_s_at  | PAPD5            | 1,917954284  | 1,916759838  | 0,001194447 |  |
| 201460_at    | MAPKAPK2         | 3,722507547  | 3,721356767  | 0,00115078  |  |
| 217954_s_at  | PHF3             | 3,999522577  | 3,9984201    | 0,001102477 |  |
| 203051_at    | BAHD1            | 1,90937145   | 1,908311039  | 0,001060411 |  |
| 213132_s_at  | MCAT             | 2,814842651  | 2,813804482  | 0,001038169 |  |
| 213509_x_at  | CES2             | 2,227406889  | 2,226407528  | 0,000999361 |  |
| 231370_at    | -                | 2,227406889  | 2,226407528  | 0,000999361 |  |
| 227547_at    | -                | 2,81177561   | 2,810785576  | 0,000990034 |  |
| 208579_x_at  | H2BFS /// HIST1  | 7,376849629  | 7,375886965  | 0,000962664 |  |
| 210681_s_at  | USP15            | 4,736009955  | 4,735047668  | 0,000962287 |  |
| 213452_at    | ZNF184           | 2,710020346  | 2,709065209  | 0,000955137 |  |
| 231990_at    | USP15            | 1,709647566  | 1,708698295  | 0,000949271 |  |
| 209069_s_at  | H3F3A /// H3F3B  | 6,832957376  | 6,832009248  | 0,000948128 |  |
| 1554027_a_at | SLC4A4           | -2,779459409 | -2,780313924 | 0,000854516 |  |
| 1554418_s_at | SPOCK3           | -2,779459409 | -2,780313924 | 0,000854516 |  |
| 1556805_at   | -                | -2,779459409 | -2,780313924 | 0,000854516 |  |
| 1557475_at   | LINC00507 /// LC | -2,779459409 | -2,780313924 | 0,000854516 |  |
| 1557863_at   | -                | -2,779459409 | -2,780313924 | 0,000854516 |  |
| 1559470_at   | D21S2088E        | -2,779459409 | -2,780313924 | 0,000854516 |  |
| 1560657_at   | TIE1             | -2,779459409 | -2,780313924 | 0,000854516 |  |
| 1562107_at   | -                | -2,779459409 | -2,780313924 | 0,000854516 |  |
| 1562623_at   | LOC146513        | -2,779459409 | -2,780313924 | 0,000854516 |  |
| 1565924_a_at | -                | -2,779459409 | -2,780313924 | 0,000854516 |  |
| 1568896_at   | STXBP5L          | -2,779459409 | -2,780313924 | 0,000854516 |  |
| 1570268_at   | -                | -2,779459409 | -2,780313924 | 0,000854516 |  |
| 213382_at    | MST1 /// MST1P2  | -2,779459409 | -2,780313924 | 0,000854516 |  |
| 215002_at    | 61E3.4 /// LOC10 | -2,779459409 | -2,780313924 | 0,000854516 |  |
| 217460_at    | TNP2             | -2,779459409 | -2,780313924 | 0,000854516 |  |
| 232715_at    | -                | -2,779459409 | -2,780313924 | 0,000854516 |  |
| 234038_at    | -                | -2,779459409 | -2,780313924 | 0,000854516 |  |
| 234185_at    | -                | -2,779459409 | -2,780313924 | 0,000854516 |  |
| 236793_at    | -                | -2,779459409 | -2,780313924 | 0,000854516 |  |
| 237066_at    | -                | -2,779459409 | -2,780313924 | 0,000854516 |  |
| 240361_at    | LOC100507603     | -2,779459409 | -2,780313924 | 0,000854516 |  |
| 240706_at    | -                | -2,779459409 | -2,780313924 | 0,000854516 |  |
| 240907_at    | -                | -2,779459409 | -2,780313924 | 0,000854516 |  |
| 241168_at    | -                | -2,779459409 | -2,780313924 | 0,000854516 |  |
| 241485_at    | MYT1L            | -2,779459409 | -2,780313924 | 0,000854516 |  |
| 242127_at    | -                | -2,779459409 | -2,780313924 | 0,000854516 |  |
| 244390_at    | -                | -2,779459409 | -2,780313924 | 0,000854516 |  |
| 242417_at    | LOC283278        | 0,480753764  | 0,479907041  | 0,000846723 |  |
| 212039_x_at  | RNU86 /// RPL3 / | 7,662876265  | 7,662046928  | 0,000829337 |  |
| 227703_s_at  | SYTL4            | 2,981056773  | 2,980244813  | 0,00081196  |  |
| 48808_at     | DHFR             | 3,700289946  | 3,69948842   | 0,000801526 |  |
| 202727_s_at  | IFNGR1           | 4,249494456  | 4,248708657  | 0,000785799 |  |
| 218333_at    | DERL2            | 3,977794563  | 3,977034308  | 0,000760255 |  |
| 227712_at    | LYRM2            | 3,211467103  | 3,210719429  | 0,000747674 |  |
| 202303_x_at  | SMARCA5          | 3,794188277  | 3,793476213  | 0,000712064 |  |

|             |                 |              |              |             |  |
|-------------|-----------------|--------------|--------------|-------------|--|
| 50314_i_at  | C20orf27        | 2,586251598  | 2,585563171  | 0,000688427 |  |
| 207030_s_at | CSRP2           | 1,69307511   | 1,692388143  | 0,000686968 |  |
| 207153_s_at | GLMN            | 3,052955227  | 3,052311115  | 0,000644112 |  |
| 200040_at   | KHDRBS1         | 5,825447133  | 5,824804578  | 0,000642555 |  |
| 218256_s_at | NUP54           | 5,071563295  | 5,070939787  | 0,000623508 |  |
| 220173_at   | C14orf45        | 1,201332287  | 1,200746069  | 0,000586217 |  |
| 208778_s_at | SNORA29 /// TC  | 6,510350114  | 6,50979668   | 0,000553435 |  |
| 226555_at   | INO80D          | 1,462198073  | 1,461646549  | 0,000551524 |  |
| 204349_at   | MED7            | 2,577249059  | 2,576704359  | 0,000544699 |  |
| 201714_at   | TUBG1           | 3,828735867  | 3,828227545  | 0,000508322 |  |
| 207618_s_at | BCS1L           | 2,960432227  | 2,959949103  | 0,000483125 |  |
| 227597_at   | DIS3L2          | 0,457392764  | 0,456918297  | 0,000474467 |  |
| 208774_at   | CSNK1D          | 3,872077355  | 3,871608557  | 0,000468797 |  |
| 233841_s_at | SUDS3           | 2,678376417  | 2,677924589  | 0,000451828 |  |
| 221458_at   | HTR1F           | 1,191926657  | 1,191491281  | 0,000435376 |  |
| 234941_s_at | GPHN            | 1,191926657  | 1,191491281  | 0,000435376 |  |
| 209421_at   | MSH2            | 4,46638963   | 4,466010984  | 0,000378646 |  |
| 1560671_at  | KIAA1652        | -0,136301282 | -0,136643983 | 0,0003427   |  |
| 206152_at   | AGAP2           | -0,136301282 | -0,136643983 | 0,0003427   |  |
| 206862_at   | ZNF254          | -0,136301282 | -0,136643983 | 0,0003427   |  |
| 206869_at   | CHAD            | -0,136301282 | -0,136643983 | 0,0003427   |  |
| 222957_at   | NEU4            | -0,136301282 | -0,136643983 | 0,0003427   |  |
| 224923_at   | TTC7A           | -0,136301282 | -0,136643983 | 0,0003427   |  |
| 239220_at   | -               | -0,136301282 | -0,136643983 | 0,0003427   |  |
| 202716_at   | PTPN1           | 3,508091848  | 3,507749374  | 0,000342475 |  |
| 226116_at   | DFFA            | 3,61576656   | 3,615478364  | 0,000288196 |  |
| 228500_at   | THAP8           | 1,859746653  | 1,859476797  | 0,000269856 |  |
| 212274_at   | LPIN1           | 1,666156729  | 1,665902186  | 0,000254543 |  |
| 223947_s_at | MED23           | 2,559073676  | 2,558821855  | 0,000251822 |  |
| 202951_at   | STK38           | 4,834877439  | 4,834642428  | 0,000235011 |  |
| 213977_s_at | CIZ1            | 1,442503549  | 1,442269454  | 0,000234095 |  |
| 219743_at   | HEY2            | 1,177702228  | 1,177496821  | 0,000205407 |  |
| 202201_at   | BLVRB           | 5,280393903  | 5,280215235  | 0,000178668 |  |
| 203484_at   | SEC61G          | 5,854054399  | 5,853876947  | 0,000177452 |  |
| 201721_s_at | LAPTM5          | 6,710575593  | 6,710421896  | 0,000153697 |  |
| 223266_at   | STRADB          | 2,758612869  | 2,758473378  | 0,000139491 |  |
| 200800_s_at | HSPA1A /// HSPA | 5,406207333  | 5,406069533  | 0,0001378   |  |
| 223383_at   | ZNRF1           | 2,171078719  | 2,170981159  | 9,75601E-05 |  |
| 233878_s_at | XRN2            | 4,089014699  | 4,08904909   | -3,4391E-05 |  |
| 201558_at   | RAE1            | 5,28177997   | 5,281851323  | -7,1352E-05 |  |
| 225036_at   | TOMM5           | 5,733019003  | 5,733100797  | -8,1794E-05 |  |
| 244519_at   | ASXL1           | 3,691139316  | 3,691304166  | -0,00016485 |  |
| 210537_s_at | TADA2A          | 0,417596971  | 0,417770464  | -0,00017349 |  |
| 221418_s_at | MED16           | 0,417596971  | 0,417770464  | -0,00017349 |  |
| 213890_x_at | RPS16           | 8,173815646  | 8,174003891  | -0,00018824 |  |
| 222744_s_at | TMLHE           | 1,000476627  | 1,000684521  | -0,00020789 |  |
| 205292_s_at | HNRNPA2B1       | 6,75331653   | 6,753558289  | -0,00024176 |  |
| 222237_s_at | ZFP112 /// ZNF2 | 1,631786706  | 1,632095957  | -0,00030925 |  |
| 238034_at   | CANX            | 2,520143371  | 2,520531219  | -0,00038785 |  |
| 223301_s_at | CCDC82          | 2,726400382  | 2,726791458  | -0,00039108 |  |
| 211423_s_at | SC5DL           | 2,986507217  | 2,986947093  | -0,00043988 |  |
| 216306_x_at | PTBP1           | 6,033929877  | 6,034400153  | -0,00047028 |  |
| 213109_at   | TNIK            | 2,134723057  | 2,135226207  | -0,00050315 |  |
| 221517_s_at | MED17           | 3,455019843  | 3,455550298  | -0,00053046 |  |
| 201890_at   | RRM2            | 6,024025496  | 6,024580369  | -0,00055487 |  |
| 209194_at   | CETN2           | 3,97847854   | 3,979052747  | -0,00057421 |  |

|             |                 |              |              |             |  |
|-------------|-----------------|--------------|--------------|-------------|--|
| 204711_at   | KIAA0753        | 2,392522438  | 2,39311332   | -0,00059088 |  |
| 36019_at    | STK19           | 2,614687931  | 2,615282623  | -0,00059469 |  |
| 220330_s_at | SAMSN1          | 2,506929603  | 2,507538456  | -0,00060885 |  |
| 1566549_at  | -               | -0,196756757 | -0,19610998  | -0,00064678 |  |
| 219316_s_at | FLVCR2          | -0,196756757 | -0,19610998  | -0,00064678 |  |
| 243786_at   | ZDHHC20         | -0,196756757 | -0,19610998  | -0,00064678 |  |
| 201854_s_at | ATMIN           | 2,890927111  | 2,891586849  | -0,00065974 |  |
| 1555704_at  | CMTM3           | -1,424023738 | -1,423348341 | -0,0006754  |  |
| 1565759_at  | RPL13           | -1,424023738 | -1,423348341 | -0,0006754  |  |
| 203461_at   | CHD2            | -1,424023738 | -1,423348341 | -0,0006754  |  |
| 207418_s_at | DDO             | -1,424023738 | -1,423348341 | -0,0006754  |  |
| 208559_at   | PDX1            | -1,424023738 | -1,423348341 | -0,0006754  |  |
| 210042_s_at | CTSZ            | -1,424023738 | -1,423348341 | -0,0006754  |  |
| 210889_s_at | FCGR2B          | -1,424023738 | -1,423348341 | -0,0006754  |  |
| 215503_at   | SPINT3          | -1,424023738 | -1,423348341 | -0,0006754  |  |
| 216581_at   | -               | -1,424023738 | -1,423348341 | -0,0006754  |  |
| 220010_at   | KCNE1L          | -1,424023738 | -1,423348341 | -0,0006754  |  |
| 228580_at   | HTRA3           | -1,424023738 | -1,423348341 | -0,0006754  |  |
| 232331_at   | -               | -1,424023738 | -1,423348341 | -0,0006754  |  |
| 232944_at   | -               | -1,424023738 | -1,423348341 | -0,0006754  |  |
| 235293_at   | -               | -1,424023738 | -1,423348341 | -0,0006754  |  |
| 236820_at   | -               | -1,424023738 | -1,423348341 | -0,0006754  |  |
| 237409_at   | -               | -1,424023738 | -1,423348341 | -0,0006754  |  |
| 243101_x_at | -               | -1,424023738 | -1,423348341 | -0,0006754  |  |
| 224585_x_at | ACTG1           | 7,976656474  | 7,977345414  | -0,00068894 |  |
| 224078_at   | HIATL2          | 2,122398022  | 2,123108223  | -0,0007102  |  |
| 44783_s_at  | HEY1            | 7,205446641  | 7,206159621  | -0,00071298 |  |
| 208719_s_at | DDX17           | 1,607231019  | 1,60795124   | -0,00072022 |  |
| 221311_x_at | LYRM2           | 3,25727902   | 3,258033502  | -0,00075448 |  |
| 235175_at   | GBP4            | 1,795990708  | 1,796776588  | -0,00078588 |  |
| 204775_at   | CHAF1B          | 1,965648824  | 1,966439221  | -0,0007904  |  |
| 228512_at   | PTCD3           | 2,491678455  | 2,492544876  | -0,00086642 |  |
| 211986_at   | AHNAK           | 2,37600538   | 2,376875125  | -0,00086975 |  |
| 223221_at   | SCO1            | 3,375201825  | 3,376085218  | -0,00088339 |  |
| 201329_s_at | ETS2            | 2,790121796  | 2,791007185  | -0,00088539 |  |
| 220840_s_at | C1orf112        | 1,789769151  | 1,790660532  | -0,00089138 |  |
| 1554033_at  | FRMD4A          | -2,504600601 | -2,503677622 | -0,00092298 |  |
| 1555430_at  | TSTD2           | -2,504600601 | -2,503677622 | -0,00092298 |  |
| 1557050_at  | HOTAIRM1        | -2,504600601 | -2,503677622 | -0,00092298 |  |
| 1557560_at  | LOC100506496    | -2,504600601 | -2,503677622 | -0,00092298 |  |
| 1560284_at  | -               | -2,504600601 | -2,503677622 | -0,00092298 |  |
| 1560728_at  | -               | -2,504600601 | -2,503677622 | -0,00092298 |  |
| 1562694_at  | C3orf65         | -2,504600601 | -2,503677622 | -0,00092298 |  |
| 1563154_at  | -               | -2,504600601 | -2,503677622 | -0,00092298 |  |
| 1566046_at  | -               | -2,504600601 | -2,503677622 | -0,00092298 |  |
| 1568930_at  | EFCAB1          | -2,504600601 | -2,503677622 | -0,00092298 |  |
| 206449_s_at | MASP1           | -2,504600601 | -2,503677622 | -0,00092298 |  |
| 207935_s_at | KRT13           | -2,504600601 | -2,503677622 | -0,00092298 |  |
| 207952_at   | IL5             | -2,504600601 | -2,503677622 | -0,00092298 |  |
| 210435_at   | ARL17A /// ARL1 | -2,504600601 | -2,503677622 | -0,00092298 |  |
| 211298_s_at | ALB             | -2,504600601 | -2,503677622 | -0,00092298 |  |
| 216636_at   | -               | -2,504600601 | -2,503677622 | -0,00092298 |  |
| 216898_s_at | COL4A3          | -2,504600601 | -2,503677622 | -0,00092298 |  |
| 220384_at   | NME8            | -2,504600601 | -2,503677622 | -0,00092298 |  |
| 220704_at   | IKZF1           | -2,504600601 | -2,503677622 | -0,00092298 |  |
| 224253_at   | -               | -2,504600601 | -2,503677622 | -0,00092298 |  |

|              |                 |              |              |             |  |
|--------------|-----------------|--------------|--------------|-------------|--|
| 224275_at    | GPR98           | -2,504600601 | -2,503677622 | -0,00092298 |  |
| 233086_at    | FAM209A         | -2,504600601 | -2,503677622 | -0,00092298 |  |
| 233305_at    | NECAB1          | -2,504600601 | -2,503677622 | -0,00092298 |  |
| 236894_at    | L1TD1           | -2,504600601 | -2,503677622 | -0,00092298 |  |
| 238294_at    | -               | -2,504600601 | -2,503677622 | -0,00092298 |  |
| 238941_at    | TRIM50          | -2,504600601 | -2,503677622 | -0,00092298 |  |
| 239336_at    | THBS1           | -2,504600601 | -2,503677622 | -0,00092298 |  |
| 241079_at    | -               | -2,504600601 | -2,503677622 | -0,00092298 |  |
| 242845_at    | RUNX1T1         | -2,504600601 | -2,503677622 | -0,00092298 |  |
| 244206_at    | ZFAND4          | -2,504600601 | -2,503677622 | -0,00092298 |  |
| 214212_x_at  | FERMT2          | 1,369290453  | 1,370274469  | -0,00098402 |  |
| 203350_at    | AP1G1           | 3,032022986  | 3,033010968  | -0,00098798 |  |
| 217763_s_at  | RAB31           | 3,784051878  | 3,785040604  | -0,00098873 |  |
| 207266_x_at  | RBMS1           | 2,482063962  | 2,483094137  | -0,00103017 |  |
| 201574_at    | ETF1            | 5,084646091  | 5,085689237  | -0,00104315 |  |
| 230296_at    | C16orf52        | 2,102456302  | 2,103505212  | -0,00104891 |  |
| 1560213_at   | HCP5B           | -0,221656139 | -0,220592223 | -0,00106392 |  |
| 233526_at    | -               | -0,221656139 | -0,220592223 | -0,00106392 |  |
| 202536_at    | CHMP2B          | 3,586454644  | 3,587527995  | -0,00107335 |  |
| 221787_at    | C6orf120        | 3,237986416  | 3,239069096  | -0,00108268 |  |
| 201120_s_at  | PGRMC1          | 3,907705327  | 3,908790275  | -0,00108495 |  |
| 213947_s_at  | NUP210          | 2,361396186  | 2,362515214  | -0,00111903 |  |
| 218574_s_at  | LMCD1           | 1,774096855  | 1,775255987  | -0,00115913 |  |
| 228230_at    | PRIC285         | 1,774096855  | 1,775255987  | -0,00115913 |  |
| 224648_at    | GPBP1           | 3,232262672  | 3,233443554  | -0,00118088 |  |
| 212586_at    | CAST            | 4,05440026   | 4,05564712   | -0,00124686 |  |
| 212591_at    | ARID4B /// RBM3 | 4,382572276  | 4,383838717  | -0,00126644 |  |
| 239007_at    | ZNF616          | 0,767063567  | 0,768343791  | -0,00128022 |  |
| 1562627_at   | LOC100130078    | 0,351548291  | 0,352836757  | -0,00128847 |  |
| 219156_at    | SYNJ2BP /// SYN | 0,351548291  | 0,352836757  | -0,00128847 |  |
| 221567_at    | NOL3            | 0,351548291  | 0,352836757  | -0,00128847 |  |
| 223408_s_at  | -               | 0,351548291  | 0,352836757  | -0,00128847 |  |
| 232867_at    | -               | 0,351548291  | 0,352836757  | -0,00128847 |  |
| 224624_at    | LRRC8A          | 4,318648014  | 4,319980141  | -0,00133213 |  |
| 235013_at    | SLC31A1         | 1,348276312  | 1,349621332  | -0,00134502 |  |
| 89948_at     | PCIF1           | 1,667853922  | 1,669239644  | -0,00138572 |  |
| 233080_s_at  | PRPF40A         | 4,251193561  | 4,252607423  | -0,00141386 |  |
| 1562621_at   | -               | -1,543331864 | -1,541908042 | -0,00142382 |  |
| 1565535_x_at | -               | -1,543331864 | -1,541908042 | -0,00142382 |  |
| 205818_at    | DBC1            | -1,543331864 | -1,541908042 | -0,00142382 |  |
| 206423_at    | ANGPTL7         | -1,543331864 | -1,541908042 | -0,00142382 |  |
| 206978_at    | CCR2            | -1,543331864 | -1,541908042 | -0,00142382 |  |
| 217146_at    | JRK             | -1,543331864 | -1,541908042 | -0,00142382 |  |
| 219190_s_at  | EIF2C4          | -1,543331864 | -1,541908042 | -0,00142382 |  |
| 230104_s_at  | TPPP            | -1,543331864 | -1,541908042 | -0,00142382 |  |
| 238823_at    | FMNL3           | -1,543331864 | -1,541908042 | -0,00142382 |  |
| 241131_at    | -               | -1,543331864 | -1,541908042 | -0,00142382 |  |
| 241267_at    | EHD3            | -1,543331864 | -1,541908042 | -0,00142382 |  |
| 241977_s_at  | RAB3C           | -1,543331864 | -1,541908042 | -0,00142382 |  |
| 242315_at    | -               | -1,543331864 | -1,541908042 | -0,00142382 |  |
| 244064_at    | -               | -1,543331864 | -1,541908042 | -0,00142382 |  |
| 226507_at    | PAK1            | 1,079110292  | 1,080561626  | -0,00145133 |  |
| 237868_x_at  | -               | 1,079110292  | 1,080561626  | -0,00145133 |  |
| 37028_at     | PPP1R15A        | 3,34210197   | 3,343554046  | -0,00145208 |  |
| 223625_at    | FAM126A         | 2,926807124  | 2,928263672  | -0,00145655 |  |
| 200729_s_at  | ACTR2           | 5,384180142  | 5,38567249   | -0,00149235 |  |

|              |                 |              |              |             |  |
|--------------|-----------------|--------------|--------------|-------------|--|
| 224880_at    | RALA            | 4,659596938  | 4,661126158  | -0,00152922 |  |
| 204905_s_at  | EEF1E1          | 5,95202668   | 5,953562035  | -0,00153535 |  |
| 208965_s_at  | IFI16           | 0,334552598  | 0,336136178  | -0,00158358 |  |
| 236286_at    | PROCA1          | 0,334552598  | 0,336136178  | -0,00158358 |  |
| 225253_s_at  | METTL2A /// ME  | 4,224629877  | 4,226225581  | -0,0015957  |  |
| 209043_at    | PAPSS1          | 3,957816838  | 3,959421856  | -0,00160502 |  |
| 214766_s_at  | AHCTF1          | 3,069741844  | 3,071356473  | -0,00161463 |  |
| 225563_at    | PAN3            | 3,994121175  | 3,995764148  | -0,00164297 |  |
| 208264_s_at  | EIF3J           | 2,915422315  | 2,917077481  | -0,00165517 |  |
| 1559861_at   | -               | -0,259832361 | -0,258114234 | -0,00171813 |  |
| 1566452_at   | -               | -0,259832361 | -0,258114234 | -0,00171813 |  |
| 222515_x_at  | TMEM165         | -0,259832361 | -0,258114234 | -0,00171813 |  |
| 228307_at    | EMILIN3         | -0,259832361 | -0,258114234 | -0,00171813 |  |
| 228602_at    | SGCD            | -0,259832361 | -0,258114234 | -0,00171813 |  |
| 229496_at    | CLP1            | -0,259832361 | -0,258114234 | -0,00171813 |  |
| 236159_x_at  | -               | -0,259832361 | -0,258114234 | -0,00171813 |  |
| 240432_x_at  | KLF7            | -0,259832361 | -0,258114234 | -0,00171813 |  |
| 203185_at    | RASSF2          | 1,063722698  | 1,065442793  | -0,0017201  |  |
| 227332_at    | PXN-AS1         | 1,063722698  | 1,065442793  | -0,0017201  |  |
| 218435_at    | DNAJC15         | 3,265148651  | 3,266872397  | -0,00172375 |  |
| 202825_at    | SLC25A4         | 2,737756747  | 2,739547836  | -0,00179109 |  |
| 203491_s_at  | CEP57           | 2,194816625  | 2,196649505  | -0,00183288 |  |
| 225753_at    | ZNF513          | 0,735041319  | 0,73688026   | -0,00183894 |  |
| 227201_at    | LOC643837       | 0,735041319  | 0,73688026   | -0,00183894 |  |
| 228019_s_at  | LOC100509751 /  | 5,141940812  | 5,143823736  | -0,00188292 |  |
| 217122_s_at  | SLC35E2 /// SLC | 3,191547726  | 3,193438316  | -0,00189059 |  |
| 217832_at    | SYNCRIP         | 4,731959456  | 4,733852814  | -0,00189336 |  |
| 225310_at    | RBMX /// SNORD  | 5,123506602  | 5,125413579  | -0,00190698 |  |
| 224986_s_at  | PDPK1           | 3,685285822  | 3,687194562  | -0,00190874 |  |
| 225029_at    | LOC550643       | 4,749296484  | 4,751278918  | -0,00198243 |  |
| 208728_s_at  | CDC42           | 4,770777552  | 4,772769658  | -0,00199211 |  |
| 213187_x_at  | FTL             | 7,7146981    | 7,716696773  | -0,00199867 |  |
| 1555889_a_at | CRTAP /// LOC10 | 4,480461153  | 4,482467631  | -0,00200648 |  |
| 206438_x_at  | TCTN2           | 2,724770722  | 2,726791458  | -0,00202074 |  |
| 216212_s_at  | DKC1 /// SNORA  | 3,893269405  | 3,895315489  | -0,00204608 |  |
| 210275_s_at  | ZFAND5          | 4,951987283  | 4,954036493  | -0,00204921 |  |
| 200794_x_at  | DAZAP2          | 5,711786826  | 5,713837217  | -0,00205039 |  |
| 210216_x_at  | RAD1            | 3,420201053  | 3,42231092   | -0,00210987 |  |
| 1555865_at   | LOC255512       | -0,285837228 | -0,283667828 | -0,0021694  |  |
| 215660_s_at  | MAST2           | -0,285837228 | -0,283667828 | -0,0021694  |  |
| 228203_at    | B3GNT1          | -0,285837228 | -0,283667828 | -0,0021694  |  |
| 228422_at    | LHFPL4          | -0,285837228 | -0,283667828 | -0,0021694  |  |
| 230987_at    | -               | -0,285837228 | -0,283667828 | -0,0021694  |  |
| 232022_at    | -               | -0,285837228 | -0,283667828 | -0,0021694  |  |
| 233870_at    | NAV1            | -0,285837228 | -0,283667828 | -0,0021694  |  |
| 237045_at    | FAM91A1         | -0,285837228 | -0,283667828 | -0,0021694  |  |
| 1556499_s_at | COL1A1          | 2,038300149  | 2,040470494  | -0,00217034 |  |
| 212851_at    | DCUN1D4         | 1,716223609  | 1,718396606  | -0,002173   |  |
| 244563_at    | QSER1           | 1,523472489  | 1,525647381  | -0,00217489 |  |
| 212624_s_at  | CHN1            | 1,037706275  | 1,039887232  | -0,00218096 |  |
| 208891_at    | DUSP6           | 4,169090081  | 4,171380634  | -0,00229055 |  |
| 226775_at    | ENY2            | 4,118170245  | 4,12047658   | -0,00230634 |  |
| 226924_at    | LOC400657       | 2,030406107  | 2,032717854  | -0,00231175 |  |
| 205144_at    | MFSD7           | 0,291166226  | 0,293518836  | -0,00235261 |  |
| 209414_at    | FZR1            | 0,291166226  | 0,293518836  | -0,00235261 |  |
| 231422_x_at  | TYSND1          | 0,291166226  | 0,293518836  | -0,00235261 |  |

|              |                 |              |              |             |  |
|--------------|-----------------|--------------|--------------|-------------|--|
| 244078_at    | -               | 0,291166226  | 0,293518836  | -0,00235261 |  |
| 227001_at    | NIPAL2          | 1,027166904  | 1,029536893  | -0,00236999 |  |
| 218212_s_at  | MOCS2           | 2,791679321  | 2,794067719  | -0,0023884  |  |
| 201406_at    | RPL36A /// RPL3 | 7,07437963   | 7,076856008  | -0,00247638 |  |
| 206103_at    | RAC3            | 2,605861638  | 2,608344689  | -0,00248305 |  |
| 1552827_s_at | SLC26A7         | -2,089474779 | -2,086984744 | -0,00249004 |  |
| 204468_s_at  | TIE1            | -2,089474779 | -2,086984744 | -0,00249004 |  |
| 205703_at    | -               | -2,089474779 | -2,086984744 | -0,00249004 |  |
| 206271_at    | TLR3            | -2,089474779 | -2,086984744 | -0,00249004 |  |
| 214567_s_at  | XCL1 /// XCL2   | -2,089474779 | -2,086984744 | -0,00249004 |  |
| 214595_at    | KCNG1           | -2,089474779 | -2,086984744 | -0,00249004 |  |
| 217530_at    | SLC34A1         | -2,089474779 | -2,086984744 | -0,00249004 |  |
| 220383_at    | ABCG5           | -2,089474779 | -2,086984744 | -0,00249004 |  |
| 222853_at    | FLRT3           | -2,089474779 | -2,086984744 | -0,00249004 |  |
| 234570_at    | ZNF71           | -2,089474779 | -2,086984744 | -0,00249004 |  |
| 235524_at    | RALGAPA1        | -2,089474779 | -2,086984744 | -0,00249004 |  |
| 237927_at    | -               | -2,089474779 | -2,086984744 | -0,00249004 |  |
| 238148_s_at  | ZNF818P         | -2,089474779 | -2,086984744 | -0,00249004 |  |
| 238934_at    | -               | -2,089474779 | -2,086984744 | -0,00249004 |  |
| 204969_s_at  | RDX             | 1,504602299  | 1,507116528  | -0,00251423 |  |
| 207805_s_at  | PSMD9           | 4,053102157  | 4,05564712   | -0,00254496 |  |
| 223512_at    | SAR1B           | 2,017152618  | 2,019703483  | -0,00255086 |  |
| 223016_x_at  | ZRANB2          | 4,049851779  | 4,052455702  | -0,00260392 |  |
| 205195_at    | AP1S1           | 2,277177578  | 2,27978304   | -0,00260546 |  |
| 1553405_a_at | CSMD1           | -1,964176657 | -1,961547147 | -0,00262951 |  |
| 1556999_at   | LOC100271832    | -1,964176657 | -1,961547147 | -0,00262951 |  |
| 1558760_at   | -               | -1,964176657 | -1,961547147 | -0,00262951 |  |
| 1560285_at   | -               | -1,964176657 | -1,961547147 | -0,00262951 |  |
| 1561560_at   | -               | -1,964176657 | -1,961547147 | -0,00262951 |  |
| 1562720_at   | -               | -1,964176657 | -1,961547147 | -0,00262951 |  |
| 1565325_at   | MATR3 /// SNHG  | -1,964176657 | -1,961547147 | -0,00262951 |  |
| 1566897_at   | -               | -1,964176657 | -1,961547147 | -0,00262951 |  |
| 1569614_s_at | LCN8            | -1,964176657 | -1,961547147 | -0,00262951 |  |
| 203639_s_at  | FGFR2           | -1,964176657 | -1,961547147 | -0,00262951 |  |
| 204154_at    | CDO1            | -1,964176657 | -1,961547147 | -0,00262951 |  |
| 206088_at    | LRRC37A3        | -1,964176657 | -1,961547147 | -0,00262951 |  |
| 206420_at    | IGSF6           | -1,964176657 | -1,961547147 | -0,00262951 |  |
| 210713_at    | ITSN1           | -1,964176657 | -1,961547147 | -0,00262951 |  |
| 211790_s_at  | MLL2            | -1,964176657 | -1,961547147 | -0,00262951 |  |
| 215254_at    | RCAN1           | -1,964176657 | -1,961547147 | -0,00262951 |  |
| 215578_at    | -               | -1,964176657 | -1,961547147 | -0,00262951 |  |
| 220613_s_at  | SYTL2           | -1,964176657 | -1,961547147 | -0,00262951 |  |
| 229049_at    | LOC100506655    | -1,964176657 | -1,961547147 | -0,00262951 |  |
| 231566_at    | NOXRED1         | -1,964176657 | -1,961547147 | -0,00262951 |  |
| 232316_at    | SAMD15          | -1,964176657 | -1,961547147 | -0,00262951 |  |
| 235155_at    | BDH2            | -1,964176657 | -1,961547147 | -0,00262951 |  |
| 235813_at    | -               | -1,964176657 | -1,961547147 | -0,00262951 |  |
| 236418_at    | TTLL10          | -1,964176657 | -1,961547147 | -0,00262951 |  |
| 239478_x_at  | C14orf118       | -1,964176657 | -1,961547147 | -0,00262951 |  |
| 240892_at    | -               | -1,964176657 | -1,961547147 | -0,00262951 |  |
| 244541_x_at  | -               | -1,964176657 | -1,961547147 | -0,00262951 |  |
| 244840_x_at  | DOCK4           | -1,964176657 | -1,961547147 | -0,00262951 |  |
| 210010_s_at  | SLC25A1         | 2,596981013  | 2,599625088  | -0,00264407 |  |
| 209303_at    | NDUFS4          | 3,493810203  | 3,496520471  | -0,00271027 |  |
| 224713_at    | MKI67IP         | 4,568952594  | 4,571665519  | -0,00271292 |  |
| 204090_at    | STK19           | 2,38635068   | 2,389070873  | -0,00272019 |  |



|              |                  |              |              |             |  |
|--------------|------------------|--------------|--------------|-------------|--|
| 205707_at    | IL17RA           | 1,269985355  | 1,272721751  | -0,0027364  |  |
| 225944_at    | NLN              | 1,269985355  | 1,272721751  | -0,0027364  |  |
| 214095_at    | SHMT2            | 2,26825514   | 2,271023131  | -0,00276799 |  |
| 217286_s_at  | NDRG3            | 3,202127528  | 3,204982027  | -0,0028545  |  |
| 209478_at    | STRA13           | 4,806654012  | 4,809530416  | -0,0028764  |  |
| 1553701_a_at | DUSP18           | -0,325749314 | -0,322870281 | -0,00287903 |  |
| 1554287_at   | TRIM4            | -0,325749314 | -0,322870281 | -0,00287903 |  |
| 207367_at    | ATP12A           | -0,325749314 | -0,322870281 | -0,00287903 |  |
| 215138_s_at  | KAZN             | -0,325749314 | -0,322870281 | -0,00287903 |  |
| 216881_x_at  | PRB4             | -0,325749314 | -0,322870281 | -0,00287903 |  |
| 232623_at    | LOC100128751     | -0,325749314 | -0,322870281 | -0,00287903 |  |
| 235249_at    | RDH13            | -0,325749314 | -0,322870281 | -0,00287903 |  |
| 238646_at    | -                | -0,325749314 | -0,322870281 | -0,00287903 |  |
| 243594_x_at  | SPIRE2           | -0,325749314 | -0,322870281 | -0,00287903 |  |
| 44669_at     | SDHAF1           | 3,924839896  | 3,927724715  | -0,00288482 |  |
| 200703_at    | DYNLL1           | 6,611097066  | 6,614026941  | -0,00292987 |  |
| 59644_at     | BMP2K            | 5,247148178  | 5,250095671  | -0,00294749 |  |
| 205097_at    | SLC26A2          | 2,994644467  | 2,997606395  | -0,00296193 |  |
| 221937_at    | SYNRG            | 2,840652551  | 2,843651104  | -0,00299855 |  |
| 1567080_s_at | CLN6             | 2,837639949  | 2,840694075  | -0,00305413 |  |
| 226736_at    | CHURC1           | 3,9480725    | 3,951219941  | -0,00314744 |  |
| 216379_x_at  | CD24             | 0,984222186  | 0,987376598  | -0,00315441 |  |
| 1556046_a_at | LINC00599 /// MI | 0,246434561  | 0,249604176  | -0,00316961 |  |
| 223362_s_at  | 37865            | 0,246434561  | 0,249604176  | -0,00316961 |  |
| 243982_at    | -                | 0,246434561  | 0,249604176  | -0,00316961 |  |
| 219806_s_at  | C11orf75         | 1,982112682  | 1,98530622   | -0,00319354 |  |
| 212804_s_at  | GAPVD1           | 2,830080806  | 2,833274877  | -0,00319407 |  |
| 1554250_s_at | TRIM73           | 1,46610492   | 1,469325098  | -0,00322018 |  |
| 220113_x_at  | POLR1B           | 1,46610492   | 1,469325098  | -0,00322018 |  |
| 229822_at    | -                | 1,46610492   | 1,469325098  | -0,00322018 |  |
| 1553857_at   | IGSF22           | -0,352951799 | -0,34958478  | -0,00336702 |  |
| 1554607_at   | CNKSR2           | -0,352951799 | -0,34958478  | -0,00336702 |  |
| 1554835_a_at | B3GNT5 /// LOC   | -0,352951799 | -0,34958478  | -0,00336702 |  |
| 209684_at    | RIN2             | -0,352951799 | -0,34958478  | -0,00336702 |  |
| 214025_at    | DDX28            | -0,352951799 | -0,34958478  | -0,00336702 |  |
| 217468_at    | CYP2D6           | -0,352951799 | -0,34958478  | -0,00336702 |  |
| 219118_at    | FKBP11           | -0,352951799 | -0,34958478  | -0,00336702 |  |
| 220296_at    | -                | -0,352951799 | -0,34958478  | -0,00336702 |  |
| 221633_at    | NCAPH2           | -0,352951799 | -0,34958478  | -0,00336702 |  |
| 223517_at    | FBXO44           | -0,352951799 | -0,34958478  | -0,00336702 |  |
| 236709_at    | -                | -0,352951799 | -0,34958478  | -0,00336702 |  |
| 237654_at    | PPP1R36          | -0,352951799 | -0,34958478  | -0,00336702 |  |
| 203218_at    | MAPK9            | 3,109000457  | 3,112391743  | -0,00339129 |  |
| 206176_at    | BMP6             | 1,233777334  | 1,23718272   | -0,00340539 |  |
| 227406_at    | GABPB1-AS1       | 1,233777334  | 1,23718272   | -0,00340539 |  |
| 227103_s_at  | ECE2             | 1,968405881  | 1,971855016  | -0,00344913 |  |
| 1555618_s_at | SAE1             | 4,552510269  | 4,555975485  | -0,00346522 |  |
| 207988_s_at  | ARPC2            | 4,965850214  | 4,96934727   | -0,00349706 |  |
| 212088_at    | PMPCA            | 3,889637741  | 3,893176339  | -0,0035386  |  |
| 1552295_a_at | SLC39A13         | 0,95671774   | 0,960386719  | -0,00366898 |  |
| 201561_s_at  | CLSTN1           | 0,95671774   | 0,960386719  | -0,00366898 |  |
| 202179_at    | BLMH             | 3,277429131  | 3,281121096  | -0,00369197 |  |
| 201897_s_at  | CKS1B            | 6,202505765  | 6,206215175  | -0,00370941 |  |
| 218082_s_at  | UBP1             | 3,719237563  | 3,722963534  | -0,00372597 |  |
| 219348_at    | USE1             | 2,331726354  | 2,335461563  | -0,00373521 |  |
| 204218_at    | ANAPC15          | 2,630440446  | 2,634191677  | -0,00375123 |  |

|              |                  |              |             |             |  |
|--------------|------------------|--------------|-------------|-------------|--|
| 212788_x_at  | FTL              | 7,940738094  | 7,944538334 | -0,00380024 |  |
| 224739_at    | PIM3             | 3,149650293  | 3,153484076 | -0,00383378 |  |
| 203245_s_at  | LINC00094        | 1,946200473  | 1,950068772 | -0,0038683  |  |
| 221562_s_at  | SIRT3            | 0,945567441  | 0,949447784 | -0,00388034 |  |
| 208856_x_at  | RPLP0            | 7,905611789  | 7,909513373 | -0,00390158 |  |
| 218575_at    | ANAPC1 /// LOC   | 3,480351894  | 3,484256382 | -0,00390449 |  |
| 221988_at    | C19orf42         | 3,142344098  | 3,146317015 | -0,00397292 |  |
| 1569445_at   | LOC100287576 /   | 0,20027154   | 0,204310755 | -0,00403922 |  |
| 215479_at    | -                | 0,20027154   | 0,204310755 | -0,00403922 |  |
| 229531_at    | -                | 0,20027154   | 0,204310755 | -0,00403922 |  |
| 1560943_s_at | PGD              | -0,394749123 | -0,39061235 | -0,00413677 |  |
| 228897_at    | DERL3            | -0,394749123 | -0,39061235 | -0,00413677 |  |
| 237878_at    | -                | -0,394749123 | -0,39061235 | -0,00413677 |  |
| 208689_s_at  | RPN2             | 5,950110119  | 5,954331698 | -0,00422158 |  |
| 225437_s_at  | BRAT1            | 1,603688695  | 1,60795124  | -0,00426255 |  |
| 226385_s_at  | MALSU1           | 5,763102253  | 5,767373629 | -0,00427138 |  |
| 218269_at    | DROSHA           | 4,624194503  | 4,628492984 | -0,00429848 |  |
| 201403_s_at  | LOC100505828 /   | 4,866998631  | 4,871328311 | -0,00432968 |  |
| 226027_at    | SWI5             | 2,506929603  | 2,511262629 | -0,00433303 |  |
| 228287_at    | ING5             | 2,352981171  | 2,357351836 | -0,00437067 |  |
| 223247_at    | MED10            | 3,056846434  | 3,061230246 | -0,00438381 |  |
| 223294_at    | CXorf26          | 4,377913865  | 4,382314353 | -0,00440049 |  |
| 208996_s_at  | POLR2C           | 4,179835245  | 4,18426834  | -0,00443309 |  |
| 211987_at    | TOP2B            | 5,252954628  | 5,257390237 | -0,00443561 |  |
| 209685_s_at  | PRKCB            | 4,762858846  | 4,767329587 | -0,00447074 |  |
| 213449_at    | POP1             | 2,292660284  | 2,297144887 | -0,0044846  |  |
| 200689_x_at  | EEF1G /// MIR36  | 7,483812203  | 7,488300539 | -0,00448834 |  |
| 200048_s_at  | JTB              | 5,411282092  | 5,415788424 | -0,00450633 |  |
| 226923_at    | SCFD2            | 2,912562019  | 2,917077481 | -0,00451546 |  |
| 220924_s_at  | SLC38A2          | 7,107390573  | 7,111962124 | -0,00457155 |  |
| 1557710_at   | -                | 0,171847695  | 0,176436073 | -0,00458838 |  |
| 214950_at    | -                | 0,171847695  | 0,176436073 | -0,00458838 |  |
| 219922_s_at  | LTBP3            | 0,171847695  | 0,176436073 | -0,00458838 |  |
| 230169_at    | THAP6            | 0,171847695  | 0,176436073 | -0,00458838 |  |
| 236648_at    | GMPS             | 0,171847695  | 0,176436073 | -0,00458838 |  |
| 219679_s_at  | WAC              | 1,58584542   | 1,590454215 | -0,0046088  |  |
| 206102_at    | GIN51            | 4,775114384  | 4,779734028 | -0,00461964 |  |
| 1553542_at   | CCDC125          | -0,423248115 | -0,41858459 | -0,00466353 |  |
| 205137_x_at  | USH1C            | -0,423248115 | -0,41858459 | -0,00466353 |  |
| 213650_at    | GOLGA8A /// GO   | -0,423248115 | -0,41858459 | -0,00466353 |  |
| 243070_at    | INO80D           | -0,423248115 | -0,41858459 | -0,00466353 |  |
| 243387_at    | MESP1            | -0,423248115 | -0,41858459 | -0,00466353 |  |
| 243749_s_at  | -                | -0,423248115 | -0,41858459 | -0,00466353 |  |
| 210871_x_at  | SSX2IP           | 1,903621061  | 1,908311039 | -0,00468998 |  |
| 203865_s_at  | ADARB1           | 2,166283906  | 2,170981159 | -0,00469725 |  |
| 213505_s_at  | SUGP2            | 2,747420128  | 2,752192409 | -0,00477228 |  |
| 213625_at    | ZKSCAN4          | 2,035673598  | 2,040470494 | -0,0047969  |  |
| 204208_at    | RNGTT            | 3,859508144  | 3,864347045 | -0,0048389  |  |
| 211666_x_at  | RNU86 /// RPL3 / | 7,345711032  | 7,35061262  | -0,00490159 |  |
| 201552_at    | LAMP1            | 4,591035503  | 4,595981624 | -0,00494612 |  |
| 216870_x_at  | DLEU2            | 2,027765132  | 2,032717854 | -0,00495272 |  |
| 227724_at    | LOC728190        | 2,027765132  | 2,032717854 | -0,00495272 |  |
| 1555491_a_at | C19orf66         | 0,152582607  | 0,157549243 | -0,00496664 |  |
| 232192_at    | LOC153811        | 0,152582607  | 0,157549243 | -0,00496664 |  |
| 211594_s_at  | MRPL9            | 3,566577193  | 3,571564634 | -0,00498744 |  |
| 223443_s_at  | AMZ2P1           | 0,888485433  | 0,893473268 | -0,00498783 |  |

|              |                |              |              |             |  |
|--------------|----------------|--------------|--------------|-------------|--|
| 1554556_a_at | ATP11B         | 1,373456798  | 1,378453643  | -0,00499685 |  |
| 224302_s_at  | MRPS36         | 4,371158382  | 4,376200741  | -0,00504236 |  |
| 208826_x_at  | HINT1          | 4,866998631  | 4,872052597  | -0,00505397 |  |
| 229120_s_at  | CDC42SE1       | 4,018934862  | 4,024062565  | -0,0051277  |  |
| 200909_s_at  | RPLP2 /// SNOR | 7,735887788  | 7,741085628  | -0,00519784 |  |
| 218185_s_at  | ARMC1          | 4,664280639  | 4,669482912  | -0,00520227 |  |
| 212529_at    | LSM12          | 2,254767157  | 2,259997914  | -0,00523076 |  |
| 223405_at    | NPL            | 1,139070151  | 1,144305291  | -0,00523514 |  |
| 221481_x_at  | HNRNPD         | 6,703353216  | 6,708598363  | -0,00524515 |  |
| 201358_s_at  | COPB1          | 5,829243814  | 5,834498675  | -0,00525486 |  |
| 209832_s_at  | CDT1           | 1,722769813  | 1,728030156  | -0,00526034 |  |
| 212744_at    | BBS4           | 1,722769813  | 1,728030156  | -0,00526034 |  |
| 200595_s_at  | EIF3A          | 5,398050406  | 5,403316429  | -0,00526602 |  |
| 1556821_x_at | DLEU2          | 0,87091093   | 0,876248481  | -0,00533755 |  |
| 205851_at    | NME6           | 0,87091093   | 0,876248481  | -0,00533755 |  |
| 200688_at    | SF3B3          | 1,868628927  | 1,874012195  | -0,00538327 |  |
| 203278_s_at  | PHF21A         | 1,868628927  | 1,874012195  | -0,00538327 |  |
| 35617_at     | MAPK7          | 1,003167985  | 1,008610748  | -0,00544276 |  |
| 218722_s_at  | CCDC51         | 2,933877275  | 2,939363796  | -0,00548652 |  |
| 223498_at    | SPECC1         | -0,467091869 | -0,461594427 | -0,00549744 |  |
| 224218_s_at  | TRPS1          | -0,467091869 | -0,461594427 | -0,00549744 |  |
| 226622_at    | MUC20          | -0,467091869 | -0,461594427 | -0,00549744 |  |
| 227789_at    | MRS2           | -0,467091869 | -0,461594427 | -0,00549744 |  |
| 231571_at    | LOC100507362   | -0,467091869 | -0,461594427 | -0,00549744 |  |
| 234054_at    | LOC143188      | -0,467091869 | -0,461594427 | -0,00549744 |  |
| 237502_at    | CRLS1          | -0,467091869 | -0,461594427 | -0,00549744 |  |
| 208948_s_at  | STAU1          | 4,949896306  | 4,95540405   | -0,00550774 |  |
| 202705_at    | CCNB2          | 5,014681934  | 5,02022104   | -0,00553911 |  |
| 214674_at    | USP19          | 0,123193849  | 0,128747141  | -0,00555329 |  |
| 221588_x_at  | ALDH6A1        | 0,123193849  | 0,128747141  | -0,00555329 |  |
| 239234_at    | -              | 0,123193849  | 0,128747141  | -0,00555329 |  |
| 239944_at    | -              | 0,123193849  | 0,128747141  | -0,00555329 |  |
| 203464_s_at  | EPN2           | 0,995078803  | 1,000684521  | -0,00560572 |  |
| 203620_s_at  | FCHSD2         | 0,995078803  | 1,000684521  | -0,00560572 |  |
| 229410_at    | SLC35E1        | 4,177454337  | 4,183101476  | -0,00564714 |  |
| 203122_at    | TRAPPC12       | 1,85379461   | 1,859476797  | -0,00568219 |  |
| 222962_s_at  | MCM10          | 2,849652795  | 2,855418981  | -0,00576619 |  |
| 226669_at    | USP42          | 3,255587071  | 3,261354437  | -0,00576737 |  |
| 222600_s_at  | UBA6           | 2,614687931  | 2,620464265  | -0,00577633 |  |
| 208638_at    | PDIA6          | 5,654304455  | 5,660125593  | -0,00582114 |  |
| 238829_at    | -              | 1,331241794  | 1,337086025  | -0,00584423 |  |
| 218709_s_at  | IFT52          | 3,693640704  | 3,69948842   | -0,00584772 |  |
| 209694_at    | PTS            | 4,012938265  | 4,018839599  | -0,00590133 |  |
| 202234_s_at  | SLC16A1        | 3,164152611  | 3,170070041  | -0,00591743 |  |
| 212008_at    | UBXN4          | 2,520143371  | 2,526063925  | -0,00592055 |  |
| 218848_at    | THOC6          | 2,220484971  | 2,226407528  | -0,00592256 |  |
| 228870_at    | FAM84B         | 0,841135803  | 0,847075464  | -0,00593966 |  |
| 1554493_s_at | THADA          | 0,103263601  | 0,109221392  | -0,00595779 |  |
| 220965_s_at  | RSPH6A         | 0,103263601  | 0,109221392  | -0,00595779 |  |
| 241468_at    | -              | 0,103263601  | 0,109221392  | -0,00595779 |  |
| 241921_x_at  | -              | 0,103263601  | 0,109221392  | -0,00595779 |  |
| 241364_at    | TMEM57         | 2,325288363  | 2,331254065  | -0,0059657  |  |
| 225340_s_at  | CAPRIN1        | 5,335357524  | 5,341379601  | -0,00602208 |  |
| 212573_at    | ENDOD1         | 1,973904239  | 1,979940779  | -0,00603654 |  |
| 210326_at    | AGXT           | -0,496991414 | -0,490927335 | -0,00606408 |  |
| 215124_at    | ZNF550         | -0,496991414 | -0,490927335 | -0,00606408 |  |

|             |                 |              |              |             |  |
|-------------|-----------------|--------------|--------------|-------------|--|
| 221967_at   | NXPH4           | -0,496991414 | -0,490927335 | -0,00606408 |  |
| 227275_at   | MEX3C           | -0,496991414 | -0,490927335 | -0,00606408 |  |
| 230938_x_at | ATF5            | -0,496991414 | -0,490927335 | -0,00606408 |  |
| 214469_at   | HIST1H2AB /// H | 3,097712429  | 3,103784293  | -0,00607186 |  |
| 223401_at   | C17orf48        | 1,318332599  | 1,324440845  | -0,00610825 |  |
| 223412_at   | KBTBD7          | 1,318332599  | 1,324440845  | -0,00610825 |  |
| 1553103_at  | NFX1            | 2,596981013  | 2,603119255  | -0,00613824 |  |
| 221258_s_at | KIF18A          | 1,829737795  | 1,835911187  | -0,00617339 |  |
| 243527_at   | -               | 0,82905153   | 0,835239052  | -0,00618752 |  |
| 208642_s_at | XRCC5           | 5,8716501    | 5,877874624  | -0,00622452 |  |
| 221484_at   | B4GALT5         | 3,361633475  | 3,367892567  | -0,00625909 |  |
| 223351_at   | C17orf80        | 2,893830579  | 2,900133867  | -0,00630329 |  |
| 226208_at   | ZSWIM6          | 2,084778276  | 2,091116676  | -0,0063384  |  |
| 223003_at   | C19orf43        | 6,121220712  | 6,127572504  | -0,00635179 |  |
| 225123_at   | SESN3           | 3,406034785  | 3,412387088  | -0,0063523  |  |
| 212015_x_at | PTBP1           | 5,405190236  | 5,411560032  | -0,0063698  |  |
| 219762_s_at | RPL36           | 6,495314506  | 6,501746214  | -0,00643171 |  |
| 212286_at   | ANKRD12         | 1,493160564  | 1,499637023  | -0,00647646 |  |
| 225278_at   | PRKAB2          | 2,077135162  | 2,083632167  | -0,00649701 |  |
| 223852_s_at | STK40           | 2,661438684  | 2,667949403  | -0,00651072 |  |
| 204326_x_at | MT1X            | 5,259160052  | 5,26568197   | -0,00652192 |  |
| 236562_at   | ZNF439          | 3,013454777  | 3,019999252  | -0,00654448 |  |
| 223167_s_at | USP25           | 1,659347917  | 1,665902186  | -0,00655427 |  |
| 226566_at   | TRIM11          | 1,659347917  | 1,665902186  | -0,00655427 |  |
| 201728_s_at | KIAA0100        | 1,073999308  | 1,080561626  | -0,00656232 |  |
| 219657_s_at | KLF3            | 0,810733188  | 0,817300337  | -0,00656715 |  |
| 229753_at   | POU2F1          | 0,810733188  | 0,817300337  | -0,00656715 |  |
| 231848_x_at | ZNF207          | 0,810733188  | 0,817300337  | -0,00656715 |  |
| 225283_at   | ARRDC4          | 4,806268808  | 4,812929194  | -0,00666039 |  |
| 216153_x_at | RECK            | 2,652894659  | 2,659583735  | -0,00668908 |  |
| 218836_at   | RPP21 /// TRIM3 | 4,839779088  | 4,846483715  | -0,00670463 |  |
| 200650_s_at | LDHA            | 7,280648955  | 7,287405531  | -0,00675658 |  |
| 227379_at   | MBOAT1          | 3,336243945  | 3,343031718  | -0,00678777 |  |
| 244317_at   | KIAA1324L       | 0,798390451  | 0,805216064  | -0,00682561 |  |
| 204955_at   | SRPX            | 2,382221458  | 2,389070873  | -0,00684942 |  |
| 202777_at   | SHOC2           | 3,75958912   | 3,766462619  | -0,0068735  |  |
| 37278_at    | TAZ             | 1,172929414  | 1,179838678  | -0,00690926 |  |
| 207258_at   | DSCR4           | -0,543051993 | -0,536087151 | -0,00696484 |  |
| 211248_s_at | CHRD            | -0,543051993 | -0,536087151 | -0,00696484 |  |
| 216197_at   | ATF7IP          | -0,543051993 | -0,536087151 | -0,00696484 |  |
| 223976_at   | FUT10           | -0,543051993 | -0,536087151 | -0,00696484 |  |
| 231342_at   | LOC646778       | -0,543051993 | -0,536087151 | -0,00696484 |  |
| 232062_at   | ADCY1           | -0,543051993 | -0,536087151 | -0,00696484 |  |
| 233417_at   | -               | -0,543051993 | -0,536087151 | -0,00696484 |  |
| 236250_at   | AFG3L1P         | -0,543051993 | -0,536087151 | -0,00696484 |  |
| 240780_at   | -               | -0,543051993 | -0,536087151 | -0,00696484 |  |
| 210178_x_at | SRSF10          | 3,926967479  | 3,933981372  | -0,00701389 |  |
| 212706_at   | RASA4 /// RASA4 | 0,052199481  | 0,059218869  | -0,00701939 |  |
| 214490_at   | ARSF            | 0,052199481  | 0,059218869  | -0,00701939 |  |
| 217711_at   | TEK             | 0,052199481  | 0,059218869  | -0,00701939 |  |
| 227876_at   | ARHGAP39        | 0,052199481  | 0,059218869  | -0,00701939 |  |
| 228860_at   | UBE3B           | 0,052199481  | 0,059218869  | -0,00701939 |  |
| 237453_at   | ZNF529          | 0,052199481  | 0,059218869  | -0,00701939 |  |
| 237799_at   | SLC22A12        | 0,052199481  | 0,059218869  | -0,00701939 |  |
| 244523_at   | MMD             | 0,052199481  | 0,059218869  | -0,00701939 |  |
| 214938_x_at | HMGB1           | 7,454460331  | 7,461481408  | -0,00702108 |  |

|              |                 |             |              |             |  |
|--------------|-----------------|-------------|--------------|-------------|--|
| 201553_s_at  | LAMP1           | 5,815911485 | 5,822932837  | -0,00702135 |  |
| 218742_at    | NARFL           | 1,274448124 | 1,281471383  | -0,00702326 |  |
| 223207_x_at  | PHPT1           | 4,656608465 | 4,66363827   | -0,00702981 |  |
| 236371_s_at  | TGS1            | 1,04816921  | 1,055274826  | -0,00710562 |  |
| 202653_s_at  | 07.03.15        | 4,074372924 | 4,08155382   | -0,0071809  |  |
| 217869_at    | HSD17B12        | 5,117309148 | 5,124502072  | -0,00719292 |  |
| 238417_at    | PGM2L1          | 0,779676066 | 0,786897721  | -0,00722166 |  |
| 201350_at    | FLOT2           | 2,456762221 | 2,464004877  | -0,00724266 |  |
| 201763_s_at  | DAXX            | 3,211467103 | 3,218713651  | -0,00724655 |  |
| 223486_at    | GTPBP8          | 3,848325987 | 3,855584709  | -0,00725872 |  |
| 218286_s_at  | RNF7            | 3,312571045 | 3,319860027  | -0,00728898 |  |
| 218920_at    | FAM193B         | 2,038300149 | 2,045615873  | -0,00731572 |  |
| 200015_s_at  | 37500           | 5,967440469 | 5,974790325  | -0,00734986 |  |
| 212855_at    | DCUN1D4         | 3,69780007  | 3,705189898  | -0,00738983 |  |
| 200877_at    | CCT4            | 6,511591115 | 6,519016859  | -0,00742574 |  |
| 78495_at     | ZNF783          | 3,378314944 | 3,385753948  | -0,007439   |  |
| 235023_at    | VPS13C          | 1,251994932 | 1,259496994  | -0,00750206 |  |
| 215293_s_at  | PGAP2           | 2,965960999 | 2,973511251  | -0,00755025 |  |
| 203136_at    | RABAC1          | 4,571221501 | 4,578781665  | -0,00756016 |  |
| 203670_at    | ARPC4-TTLL3 /// | -0,57445847 | -0,566887459 | -0,00757101 |  |
| 207611_at    | HIST1H2BL       | -0,57445847 | -0,566887459 | -0,00757101 |  |
| 216914_at    | CDC25C          | -0,57445847 | -0,566887459 | -0,00757101 |  |
| 229817_at    | ZNF608          | -0,57445847 | -0,566887459 | -0,00757101 |  |
| 230837_at    | LOC100132057    | -0,57445847 | -0,566887459 | -0,00757101 |  |
| 1559388_a_at | LYNX1           | 0,760715727 | 0,768343791  | -0,00762806 |  |
| 213645_at    | ENOSF1          | 0,760715727 | 0,768343791  | -0,00762806 |  |
| 222015_at    | CSNK1E          | 1,607231019 | 1,614891062  | -0,00766004 |  |
| 1559443_s_at | IL21R-AS1       | 1,021868205 | 1,029536893  | -0,00766869 |  |
| 201028_s_at  | CD99            | 1,021868205 | 1,029536893  | -0,00766869 |  |
| 214391_x_at  | PTGER1          | 1,021868205 | 1,029536893  | -0,00766869 |  |
| 1554388_at   | VPS29           | 0,020670649 | 0,028364014  | -0,00769336 |  |
| 1569149_at   | PDLIM7          | 0,020670649 | 0,028364014  | -0,00769336 |  |
| 214104_at    | GPR161          | 0,020670649 | 0,028364014  | -0,00769336 |  |
| 225379_at    | MAPT            | 0,020670649 | 0,028364014  | -0,00769336 |  |
| 229617_x_at  | AP2A1           | 0,020670649 | 0,028364014  | -0,00769336 |  |
| 214686_at    | ZNF266          | 3,389672581 | 3,39737216   | -0,00769958 |  |
| 219065_s_at  | DPY30 /// MEMO  | 4,584311257 | 4,592030564  | -0,00771931 |  |
| 206288_at    | PGGT1B          | 1,434549838 | 1,442269454  | -0,00771962 |  |
| 1553218_a_at | ZNF512          | 2,338135744 | 2,345926937  | -0,00779119 |  |
| 224587_at    | SUB1            | 4,770777552 | 4,778575632  | -0,00779808 |  |
| 210811_s_at  | DDX49           | 3,18563636  | 3,193438316  | -0,00780196 |  |
| 230735_at    | -               | 0,425644434 | 0,433557298  | -0,00791286 |  |
| 231857_s_at  | AGBL5           | 0,425644434 | 0,433557298  | -0,00791286 |  |
| 232228_at    | ZNF530          | 0,425644434 | 0,433557298  | -0,00791286 |  |
| 224820_at    | COX20           | 3,850569363 | 3,858511405  | -0,00794204 |  |
| 223478_at    | TIMM8B          | 2,739371812 | 2,747463672  | -0,00809186 |  |
| 37986_at     | EPOR            | 3,604290432 | 3,612447534  | -0,0081571  |  |
| 209502_s_at  | BAIAP2          | -0,00073712 | 0,007421914  | -0,00815903 |  |
| 222347_at    | -               | -0,00073712 | 0,007421914  | -0,00815903 |  |
| 225778_at    | RBMS2           | -0,00073712 | 0,007421914  | -0,00815903 |  |
| 229894_s_at  | RAB43           | -0,00073712 | 0,007421914  | -0,00815903 |  |
| 232859_s_at  | MAGI1           | -0,00073712 | 0,007421914  | -0,00815903 |  |
| 242113_at    | -               | -0,00073712 | 0,007421914  | -0,00815903 |  |
| 225343_at    | TMED8           | 4,012938265 | 4,021126974  | -0,00818871 |  |
| 208887_at    | EIF3G           | 7,112306921 | 7,120521066  | -0,00821415 |  |
| 1555315_a_at | MAK             | 2,218170265 | 2,226407528  | -0,00823726 |  |

|              |                 |              |              |             |  |
|--------------|-----------------|--------------|--------------|-------------|--|
| 38964_r_at   | WAS             | 2,053959821  | 2,062212735  | -0,00825291 |  |
| 236402_at    | BRAF            | 1,215326747  | 1,223626587  | -0,00829984 |  |
| 47773_at     | FBXO42          | 1,314003737  | 1,322322498  | -0,00831876 |  |
| 211692_s_at  | BBC3            | 0,728550685  | 0,73688026   | -0,00832958 |  |
| 213489_at    | MAPRE2          | 0,728550685  | 0,73688026   | -0,00832958 |  |
| 209271_at    | BPTF            | 2,493593689  | 2,501934108  | -0,00834042 |  |
| 218349_s_at  | ZWILCH          | 3,53158484   | 3,540009821  | -0,00842498 |  |
| 225681_at    | CTHRC1          | 2,400710591  | 2,409170778  | -0,00846019 |  |
| 200846_s_at  | PPP1CA          | 4,984696817  | 4,993178622  | -0,00848181 |  |
| 210017_at    | MALT1           | -0,622910612 | -0,614371577 | -0,00853904 |  |
| 211706_s_at  | CDK19           | -0,622910612 | -0,614371577 | -0,00853904 |  |
| 230905_at    | -               | -0,622910612 | -0,614371577 | -0,00853904 |  |
| 234476_at    | DNAH7           | -0,622910612 | -0,614371577 | -0,00853904 |  |
| 239769_at    | CDH11           | -0,622910612 | -0,614371577 | -0,00853904 |  |
| 242328_at    | RAB3C           | -0,622910612 | -0,614371577 | -0,00853904 |  |
| 244248_at    | TTC27           | -0,622910612 | -0,614371577 | -0,00853904 |  |
| 223067_at    | CWC15           | 4,700383757  | 4,708935     | -0,00855124 |  |
| 217791_s_at  | ALDH18A1        | 4,010265089  | 4,018839599  | -0,00857451 |  |
| 226227_x_at  | ZNFX1-AS1       | 6,895768471  | 6,904379077  | -0,00861061 |  |
| 209008_x_at  | KRT8            | 0,715481152  | 0,724100169  | -0,00861902 |  |
| 226640_at    | DAGLB           | 0,715481152  | 0,724100169  | -0,00861902 |  |
| 224991_at    | CMIP            | 2,089851283  | 2,098562556  | -0,00871127 |  |
| 202595_s_at  | LEPROTL1        | 3,844579258  | 3,853385784  | -0,00880653 |  |
| 232586_x_at  | OR7E126P        | 0,384950573  | 0,393761504  | -0,00881093 |  |
| 239898_x_at  | ZNF286A         | 0,384950573  | 0,393761504  | -0,00881093 |  |
| 211085_s_at  | STK4            | 1,191926657  | 1,200746069  | -0,00881941 |  |
| 225596_at    | KLC4            | 1,191926657  | 1,200746069  | -0,00881941 |  |
| 203970_s_at  | PEX3            | 2,470441349  | 2,479296438  | -0,00885509 |  |
| 209846_s_at  | BTN3A2          | 3,137452663  | 3,146317015  | -0,00886435 |  |
| 212988_x_at  | ACTG1           | 7,81904989   | 7,827919325  | -0,00886943 |  |
| 242839_at    | -               | 1,381753566  | 1,390636111  | -0,00888254 |  |
| 1552739_s_at | ST7L            | -0,033456564 | -0,024572586 | -0,00888398 |  |
| 201141_at    | GPNUMB          | -0,033456564 | -0,024572586 | -0,00888398 |  |
| 207854_at    | GYPE            | -0,033456564 | -0,024572586 | -0,00888398 |  |
| 212292_at    | SLC7A1          | -0,033456564 | -0,024572586 | -0,00888398 |  |
| 221936_x_at  | MRPL41          | -0,033456564 | -0,024572586 | -0,00888398 |  |
| 239068_at    | GNL1            | -0,033456564 | -0,024572586 | -0,00888398 |  |
| 201059_at    | CTTN            | 3,38038663   | 3,38929984   | -0,00891321 |  |
| 212375_at    | EP400           | 2,771299138  | 2,780243895  | -0,00894476 |  |
| 218667_at    | PJA1            | 3,508091848  | 3,517040489  | -0,00894864 |  |
| 210434_x_at  | JTB             | 5,758032154  | 5,766984279  | -0,00895212 |  |
| 218058_at    | CXXC1           | 2,074578432  | 2,083632167  | -0,00905374 |  |
| 219729_at    | PRRX2           | 0,695652136  | 0,704715219  | -0,00906308 |  |
| 224316_at    | -               | 0,695652136  | 0,704715219  | -0,00906308 |  |
| 228455_at    | -               | 0,695652136  | 0,704715219  | -0,00906308 |  |
| 234999_at    | C19orf47        | 0,695652136  | 0,704715219  | -0,00906308 |  |
| 201505_at    | LAMB1           | 1,69307511   | 1,702196344  | -0,00912123 |  |
| 234952_s_at  | PHRF1           | 1,369290453  | 1,378453643  | -0,00916319 |  |
| 1554652_s_at | MAST4           | -0,655928373 | -0,646746079 | -0,00918229 |  |
| 1559002_at   | LOC340544       | -0,655928373 | -0,646746079 | -0,00918229 |  |
| 1560754_at   | CMTM7           | -0,655928373 | -0,646746079 | -0,00918229 |  |
| 203915_at    | CXCL9           | -0,655928373 | -0,646746079 | -0,00918229 |  |
| 211461_at    | CSPG4P1Y        | -0,655928373 | -0,646746079 | -0,00918229 |  |
| 212226_s_at  | PPAP2B          | -0,655928373 | -0,646746079 | -0,00918229 |  |
| 214916_x_at  | IGHA1 /// IGHA2 | -0,655928373 | -0,646746079 | -0,00918229 |  |
| 215490_at    | IBA57           | -0,655928373 | -0,646746079 | -0,00918229 |  |

|              |              |              |              |             |  |
|--------------|--------------|--------------|--------------|-------------|--|
| 221615_at    | BMP8B        | -0,655928373 | -0,646746079 | -0,00918229 |  |
| 234946_at    | ENTPD6       | -0,655928373 | -0,646746079 | -0,00918229 |  |
| 238682_at    | CCDC96       | -0,655928373 | -0,646746079 | -0,00918229 |  |
| 221622_s_at  | TMEM126B     | 5,274557833  | 5,28375775   | -0,00919992 |  |
| 238015_at    | C4orf46      | 2,611163891  | 2,620464265  | -0,00930037 |  |
| 1729_at      | TRADD        | 1,610764667  | 1,620074108  | -0,00930944 |  |
| 218941_at    | FBXW2        | 1,683039483  | 1,692388143  | -0,00934866 |  |
| 227433_at    | KIAA2018     | 1,360921491  | 1,370274469  | -0,00935298 |  |
| 206410_at    | NR0B2        | 0,682279745  | 0,691645685  | -0,00936594 |  |
| 222352_at    | -            | 0,682279745  | 0,691645685  | -0,00936594 |  |
| 228130_at    | ZSCAN30      | 0,682279745  | 0,691645685  | -0,00936594 |  |
| 223564_s_at  | GNB1L        | -0,055687482 | -0,046302147 | -0,00938534 |  |
| 223666_at    | SNX5         | 3,266269388  | 3,275657468  | -0,00938808 |  |
| 217846_at    | QARS         | 5,031587647  | 5,040980656  | -0,00939301 |  |
| 223310_x_at  | PNPLA8       | 3,446146386  | 3,455550298  | -0,00940391 |  |
| 90265_at     | ADAP1        | 1,525346004  | 1,534824307  | -0,0094783  |  |
| 202893_at    | UNC13B       | 2,261526912  | 2,271023131  | -0,00949622 |  |
| 232101_s_at  | PIGN         | 2,438982012  | 2,448549499  | -0,00956749 |  |
| 208847_s_at  | ADH5         | 5,182279401  | 5,191895668  | -0,00961627 |  |
| 224150_s_at  | CEP70        | 2,156646206  | 2,166264721  | -0,00961852 |  |
| 212544_at    | ZNHIT3       | 4,61586603   | 4,625489401  | -0,00962337 |  |
| 202151_s_at  | UBAC1        | 3,049053496  | 3,058687544  | -0,00963405 |  |
| 227872_at    | POLR3A       | 2,048758794  | 2,058399602  | -0,00964081 |  |
| 1561093_at   | SLC22A25     | 1,348276312  | 1,3579181    | -0,00964179 |  |
| 203452_at    | B3GAT3       | 1,666156729  | 1,675891488  | -0,00973476 |  |
| 239329_at    | RAB21        | 1,666156729  | 1,675891488  | -0,00973476 |  |
| 244598_at    | LCP2         | 0,661985843  | 0,67181667   | -0,00983083 |  |
| 200852_x_at  | GNB2         | 3,893994642  | 3,903840511  | -0,00984587 |  |
| 223063_at    | C1orf198     | 3,548266005  | 3,558125564  | -0,00985956 |  |
| 200968_s_at  | PPIB         | 5,498509893  | 5,50837347   | -0,00986358 |  |
| 241402_at    | TSEN54       | 1,143956113  | 1,153866761  | -0,00991065 |  |
| 49485_at     | PRDM4        | 1,506500464  | 1,516411707  | -0,00991124 |  |
| 218643_s_at  | CRIP1        | 2,243430036  | 2,253342112  | -0,00991208 |  |
| 226889_at    | WDR35        | 2,422991296  | 2,432926755  | -0,00993546 |  |
| 37012_at     | CAPZB        | 5,021335256  | 5,031286769  | -0,00995151 |  |
| 218967_s_at  | PTER         | 1,655931423  | 1,665902186  | -0,00997076 |  |
| 218036_x_at  | NMD3         | 3,191547726  | 3,201528602  | -0,00998088 |  |
| 219275_at    | PDCD5        | 4,933411285  | 4,943393743  | -0,00998246 |  |
| 204627_s_at  | ITGB3        | 2,976955384  | 2,986947093  | -0,00999171 |  |
| 218973_at    | EFTUD1       | 2,976955384  | 2,986947093  | -0,00999171 |  |
| 244861_at    | ZNF527       | 2,654607516  | 2,664608955  | -0,01000144 |  |
| 225534_at    | C8orf40      | 3,886725813  | 3,896739828  | -0,01001402 |  |
| 201908_at    | DVL3         | 2,331726354  | 2,341749893  | -0,01002354 |  |
| 211700_s_at  | TRO          | 2,030406107  | 2,040470494  | -0,01006439 |  |
| 217926_at    | C19orf53     | 6,50981793   | 6,519883654  | -0,01006572 |  |
| 200631_s_at  | SET          | 6,294912682  | 6,304996536  | -0,01008385 |  |
| 217805_at    | ILF3         | 5,096666579  | 5,106765451  | -0,01009887 |  |
| 1554509_a_at | FAM188A      | 1,912238072  | 1,922365006  | -0,01012693 |  |
| 217903_at    | STRN4        | 0,911589958  | 0,921731975  | -0,01014202 |  |
| 243642_x_at  | -            | 0,648296226  | 0,658444279  | -0,01014805 |  |
| 222756_s_at  | ARRB1        | -0,089689931 | -0,079522948 | -0,01016698 |  |
| 231412_at    | LOC100506342 | -0,089689931 | -0,079522948 | -0,01016698 |  |
| 236980_at    | STRN         | -0,089689931 | -0,079522948 | -0,01016698 |  |
| 242087_x_at  | MFI2-AS1     | -0,089689931 | -0,079522948 | -0,01016698 |  |
| 222445_at    | SLC39A9      | 4,256278903  | 4,266446205  | -0,0101673  |  |
| 221563_at    | DUSP10       | 3,183265014  | 3,193438316  | -0,0101733  |  |

|              |                  |              |              |             |  |
|--------------|------------------|--------------|--------------|-------------|--|
| 225359_at    | DNAJC19          | 3,647078281  | 3,6572547    | -0,01017642 |  |
| 221569_at    | AHI1             | 2,132266459  | 2,14244844   | -0,01018198 |  |
| 229981_at    | SNX5             | 1,780386218  | 1,790660532  | -0,01027431 |  |
| 203764_at    | DLGAP5           | 4,585658616  | 4,595981624  | -0,01032301 |  |
| 226009_at    | DPCD             | 4,339030146  | 4,349404898  | -0,01037475 |  |
| 221125_s_at  | KCNMB3           | 1,314003737  | 1,324440845  | -0,01043711 |  |
| 200750_s_at  | RAN              | 6,845102872  | 6,855546609  | -0,01044374 |  |
| 213506_at    | F2RL1            | 2,482063962  | 2,492544876  | -0,01048091 |  |
| 220157_x_at  | PLEKHA8P1        | 1,119359127  | 1,129843209  | -0,01048408 |  |
| 205690_s_at  | BUD31            | 5,024981547  | 5,035495453  | -0,01051391 |  |
| 203135_at    | TBP              | 3,217273782  | 3,227795991  | -0,01052221 |  |
| 219620_x_at  | TOR4A            | 1,305306849  | 1,315948728  | -0,01064188 |  |
| 230934_at    | LOC100506057 /   | 1,305306849  | 1,315948728  | -0,01064188 |  |
| 242451_x_at  | RPS19            | 1,305306849  | 1,315948728  | -0,01064188 |  |
| 238654_at    | VSIG10L          | 2,626954721  | 2,637603218  | -0,0106485  |  |
| 204565_at    | ACOT13           | 4,111638046  | 4,122304108  | -0,01066606 |  |
| 222221_x_at  | EHD1             | 1,889144008  | 1,899812471  | -0,01066846 |  |
| 212723_at    | JMJD6            | 3,858765357  | 3,869433939  | -0,01066858 |  |
| 1552619_a_at | ANLN             | 3,111496958  | 3,122166354  | -0,0106694  |  |
| 213318_s_at  | BAG6             | 4,827683398  | 4,838353281  | -0,01066988 |  |
| 213812_s_at  | CAMKK2           | 3,729025365  | 3,739727424  | -0,01070206 |  |
| 206766_at    | ITGA10           | -0,112808516 | -0,102100538 | -0,01070798 |  |
| 211192_s_at  | CD84             | -0,112808516 | -0,102100538 | -0,01070798 |  |
| 219641_at    | DET1             | -0,112808516 | -0,102100538 | -0,01070798 |  |
| 223719_s_at  | RTBDN            | -0,112808516 | -0,102100538 | -0,01070798 |  |
| 230944_at    | C6orf223         | -0,112808516 | -0,102100538 | -0,01070798 |  |
| 241355_at    | HR               | -0,112808516 | -0,102100538 | -0,01070798 |  |
| 244425_at    | -                | -0,112808516 | -0,102100538 | -0,01070798 |  |
| 225170_at    | WDR5             | 2,472384965  | 2,483094137  | -0,01070917 |  |
| 1553535_a_at | RANGAP1          | 2,001086023  | 2,011838132  | -0,01075211 |  |
| 231917_at    | GFM2             | 2,001086023  | 2,011838132  | -0,01075211 |  |
| 212747_at    | ANKS1A           | 3,000043914  | 3,010820719  | -0,0107768  |  |
| 229366_at    | -                | 1,621313976  | 1,632095957  | -0,01078198 |  |
| 212059_s_at  | TRPC4AP          | 1,883312263  | 1,894118818  | -0,01080655 |  |
| 203344_s_at  | RBBP8            | 4,228372617  | 4,239196128  | -0,01082351 |  |
| 200065_s_at  | ARF1 /// MIR3620 | 6,10102707   | 6,111868133  | -0,01084106 |  |
| 220302_at    | MAK              | 3,787958926  | 3,798818761  | -0,01085983 |  |
| 1570241_at   | SPATA21          | -0,741668563 | -0,730778808 | -0,01088975 |  |
| 215310_at    | APC              | -0,741668563 | -0,730778808 | -0,01088975 |  |
| 216589_at    | -                | -0,741668563 | -0,730778808 | -0,01088975 |  |
| 217310_s_at  | FOXJ3            | -0,741668563 | -0,730778808 | -0,01088975 |  |
| 230242_at    | NFASC            | -0,741668563 | -0,730778808 | -0,01088975 |  |
| 230641_at    | LOC100505938     | -0,741668563 | -0,730778808 | -0,01088975 |  |
| 234521_at    | OR51I2           | -0,741668563 | -0,730778808 | -0,01088975 |  |
| 236623_at    | ATP1A1OS         | -0,741668563 | -0,730778808 | -0,01088975 |  |
| 238741_at    | FAM83A           | -0,741668563 | -0,730778808 | -0,01088975 |  |
| 1556442_x_at | -                | 2,382221458  | 2,39311332   | -0,01089186 |  |
| 205618_at    | PRRG1            | 2,817903185  | 2,828804976  | -0,01090179 |  |
| 230200_at    | NSUN6            | 2,292660284  | 2,303602088  | -0,0109418  |  |
| 219551_at    | EAF2             | 1,292162421  | 1,303116084  | -0,01095366 |  |
| 222786_at    | CHST12           | 0,613492853  | 0,624460759  | -0,01096791 |  |
| 242756_at    | -                | 0,613492853  | 0,624460759  | -0,01096791 |  |
| 1552615_at   | ACACB            | 1,748661581  | 1,759685182  | -0,0110236  |  |
| 220703_at    | IDI2-AS1         | 1,094335495  | 1,105412836  | -0,01107734 |  |
| 225057_at    | SLC15A4          | 1,094335495  | 1,105412836  | -0,01107734 |  |
| 201400_at    | PSMB3            | 6,372548281  | 6,383670962  | -0,01112268 |  |



|              |                 |              |              |             |  |
|--------------|-----------------|--------------|--------------|-------------|--|
| 209402_s_at  | SLC12A4         | 1,283332461  | 1,294497133  | -0,01116467 |  |
| 201007_at    | HADHB           | 5,219930892  | 5,231096511  | -0,01116562 |  |
| 203196_at    | ABCC4           | 5,010675163  | 5,021853686  | -0,01117852 |  |
| 201240_s_at  | LOC653566 /// S | 5,576477597  | 5,587677654  | -0,01120006 |  |
| 236381_s_at  | WRAP73          | 1,982112682  | 1,993317152  | -0,01120447 |  |
| 210541_s_at  | TRIM27          | 3,831767101  | 3,843079586  | -0,01131249 |  |
| 201482_at    | QSOX1           | 2,446911392  | 2,458228496  | -0,0113171  |  |
| 200742_s_at  | TPP1            | 1,732533761  | 1,743944487  | -0,01141073 |  |
| 218726_at    | HJURP           | 3,630637368  | 3,642048499  | -0,01141113 |  |
| 201892_s_at  | IMPDH2          | 6,00014224   | 6,01157422   | -0,01143198 |  |
| 228211_at    | ERCC6L2         | 1,079110292  | 1,090553537  | -0,01144325 |  |
| 219546_at    | BMP2K           | 5,293370663  | 5,304832091  | -0,01146143 |  |
| 200036_s_at  | RPL10A          | 7,30150281   | 7,312968279  | -0,01146547 |  |
| 206599_at    | SLC16A5         | 0,592200562  | 0,603679647  | -0,01147909 |  |
| 232710_at    | -               | 0,592200562  | 0,603679647  | -0,01147909 |  |
| 211261_at    | NUP214          | 1,269985355  | 1,281471383  | -0,01148603 |  |
| 213230_at    | CDR2L           | 1,269985355  | 1,281471383  | -0,01148603 |  |
| 224783_at    | FAM100B         | 1,85379461   | 1,865308541  | -0,01151393 |  |
| 230492_s_at  | GPCPD1          | 2,26825514   | 2,27978304   | -0,0115279  |  |
| 1552672_a_at | IGSF3           | -0,148196756 | -0,136643983 | -0,01155277 |  |
| 1566784_at   | NSF             | -0,148196756 | -0,136643983 | -0,01155277 |  |
| 209636_at    | NFKB2           | -0,148196756 | -0,136643983 | -0,01155277 |  |
| 228983_at    | -               | -0,148196756 | -0,136643983 | -0,01155277 |  |
| 238331_at    | SPRN            | -0,148196756 | -0,136643983 | -0,01155277 |  |
| 240497_at    | -               | -0,148196756 | -0,136643983 | -0,01155277 |  |
| 241599_at    | LSM11           | -0,148196756 | -0,136643983 | -0,01155277 |  |
| 220980_s_at  | ADPGK           | 3,789518787  | 3,801102381  | -0,01158359 |  |
| 203874_s_at  | SMARCA1         | 1,722769813  | 1,73441697   | -0,01164716 |  |
| 224787_s_at  | RAB18           | 4,017604437  | 4,029266691  | -0,01166225 |  |
| 213829_x_at  | RTEL1           | 1,261018186  | 1,272721751  | -0,01170356 |  |
| 223050_s_at  | FBXW5           | 1,261018186  | 1,272721751  | -0,01170356 |  |
| 224931_at    | SLC41A3         | 1,261018186  | 1,272721751  | -0,01170356 |  |
| 204948_s_at  | FST             | 2,166283906  | 2,17802703   | -0,01174312 |  |
| 222418_s_at  | TMEM43          | 2,259277178  | 2,271023131  | -0,01174595 |  |
| 222474_s_at  | TOMM22          | 4,632475172  | 4,644266013  | -0,01179084 |  |
| 1570153_at   | CCDC169         | 0,57782909   | 0,589657387  | -0,0118283  |  |
| 201976_s_at  | MYO10           | 0,57782909   | 0,589657387  | -0,0118283  |  |
| 210018_x_at  | MALT1           | 0,57782909   | 0,589657387  | -0,0118283  |  |
| 226171_at    | ZDHHC3          | 0,57782909   | 0,589657387  | -0,0118283  |  |
| 203885_at    | RAB21           | 3,870604295  | 3,882432751  | -0,01182846 |  |
| 219453_at    | KLHL36          | 0,255492549  | 0,26733076   | -0,01183821 |  |
| 219611_s_at  | CEP85           | 1,954567604  | 1,966439221  | -0,01187162 |  |
| 203814_s_at  | NQO2            | 5,097611313  | 5,109532018  | -0,0119207  |  |
| 222453_at    | CYBRD1          | 2,644299732  | 2,656223838  | -0,01192411 |  |
| 227002_at    | FAM78A          | 3,158127685  | 3,170070041  | -0,01194236 |  |
| 202530_at    | MAPK14          | 3,676882273  | 3,688839808  | -0,01195753 |  |
| 201049_s_at  | RPS18           | 8,198316508  | 8,210362016  | -0,01204551 |  |
| 226871_s_at  | ATG4D           | 2,333865983  | 2,345926937  | -0,01206095 |  |
| 1554345_a_at | GIN1            | 1,05337236   | 1,065442793  | -0,01207043 |  |
| 228453_at    | EPG5            | 1,567778694  | 1,579853228  | -0,01207453 |  |
| 1569105_at   | SETD5           | 1,829737795  | 1,841838775  | -0,01210098 |  |
| 211378_x_at  | LOC100288602 /  | 7,648604357  | 7,660737638  | -0,01213328 |  |
| 1559979_at   | SYF2            | -0,172274514 | -0,160136748 | -0,01213777 |  |
| 1568598_at   | KAZALD1         | -0,172274514 | -0,160136748 | -0,01213777 |  |
| 207343_at    | LYZL6           | -0,172274514 | -0,160136748 | -0,01213777 |  |
| 207936_x_at  | RFPL3           | -0,172274514 | -0,160136748 | -0,01213777 |  |

|              |                 |              |              |             |  |
|--------------|-----------------|--------------|--------------|-------------|--|
| 210281_s_at  | ZMYM2           | -0,172274514 | -0,160136748 | -0,01213777 |  |
| 211635_x_at  | IGHA1 /// IGHA2 | -0,172274514 | -0,160136748 | -0,01213777 |  |
| 228900_at    | SPECC1          | -0,172274514 | -0,160136748 | -0,01213777 |  |
| 229505_at    | -               | -0,172274514 | -0,160136748 | -0,01213777 |  |
| 230522_s_at  | C9orf100        | -0,172274514 | -0,160136748 | -0,01213777 |  |
| 239469_at    | -               | -0,172274514 | -0,160136748 | -0,01213777 |  |
| 241935_at    | SHROOM1         | -0,172274514 | -0,160136748 | -0,01213777 |  |
| 244686_at    | TCOF1           | -0,172274514 | -0,160136748 | -0,01213777 |  |
| 208398_s_at  | TBPL1           | 4,900226157  | 4,912395116  | -0,01216896 |  |
| 227711_at    | GTSF1           | 4,306714867  | 4,318918076  | -0,01220321 |  |
| 237367_x_at  | CFLAR           | 2,146943689  | 2,159161028  | -0,01221734 |  |
| 202857_at    | CNPY2           | 5,158634383  | 5,170858681  | -0,0122243  |  |
| 203701_s_at  | TRMT1           | 2,994644467  | 3,006869115  | -0,01222465 |  |
| 228725_x_at  | PRMT2           | 5,108900129  | 5,121154943  | -0,01225481 |  |
| 202175_at    | CHPF            | 0,822971223  | 0,835239052  | -0,01226783 |  |
| 210513_s_at  | VEGFA           | 0,822971223  | 0,835239052  | -0,01226783 |  |
| 222657_s_at  | UBE2W           | 2,559073676  | 2,571362843  | -0,01228917 |  |
| 209352_s_at  | SIN3B           | 2,406821352  | 2,419116683  | -0,01229533 |  |
| 225857_s_at  | LOC388796       | 4,464437915  | 4,476764847  | -0,01232693 |  |
| 213383_at    | SBF1            | 0,555999837  | 0,568365095  | -0,01236526 |  |
| 201018_at    | EIF1AX          | 3,848325987  | 3,860702537  | -0,01237655 |  |
| 212571_at    | CHD8            | 2,134723057  | 2,147243253  | -0,0125202  |  |
| 229111_at    | -               | 1,549482847  | 1,562009954  | -0,01252711 |  |
| 227840_at    | C2orf76         | 2,396622324  | 2,409170778  | -0,01254845 |  |
| 204669_s_at  | RNF24           | 4,08266696   | 4,09526554   | -0,01259858 |  |
| 211023_at    | PDHB            | 5,200568591  | 5,213202033  | -0,01263344 |  |
| 1552425_a_at | KLHL10          | -0,83191556  | -0,819238336 | -0,01267722 |  |
| 1556205_at   | -               | -0,83191556  | -0,819238336 | -0,01267722 |  |
| 1562227_at   | PDE5A           | -0,83191556  | -0,819238336 | -0,01267722 |  |
| 1569067_at   | -               | -0,83191556  | -0,819238336 | -0,01267722 |  |
| 204134_at    | PDE2A           | -0,83191556  | -0,819238336 | -0,01267722 |  |
| 206194_at    | HOXC4           | -0,83191556  | -0,819238336 | -0,01267722 |  |
| 206243_at    | TIMP4           | -0,83191556  | -0,819238336 | -0,01267722 |  |
| 217182_at    | MUC5AC          | -0,83191556  | -0,819238336 | -0,01267722 |  |
| 217341_at    | DNM1            | -0,83191556  | -0,819238336 | -0,01267722 |  |
| 221409_at    | OR2S2           | -0,83191556  | -0,819238336 | -0,01267722 |  |
| 222812_s_at  | RHOF            | -0,83191556  | -0,819238336 | -0,01267722 |  |
| 228895_s_at  | -               | -0,83191556  | -0,819238336 | -0,01267722 |  |
| 233525_s_at  | LINC00475       | -0,83191556  | -0,819238336 | -0,01267722 |  |
| 238859_at    | -               | -0,83191556  | -0,819238336 | -0,01267722 |  |
| 217960_s_at  | TOMM22          | 4,308891884  | 4,321571774  | -0,01267989 |  |
| 223300_s_at  | CCDC82          | 3,127619759  | 3,140317145  | -0,01269739 |  |
| 218912_at    | GCC1            | 2,864529541  | 2,877228323  | -0,01269878 |  |
| 201119_s_at  | COX8A           | 6,065979249  | 6,078682636  | -0,01270339 |  |
| 224233_s_at  | MSTO1           | 1,027166904  | 1,039887232  | -0,01272033 |  |
| 224998_at    | CMTM4           | 1,027166904  | 1,039887232  | -0,01272033 |  |
| 229328_at    | LOC100507433    | 1,027166904  | 1,039887232  | -0,01272033 |  |
| 218339_at    | MRPL22          | 4,408689531  | 4,42143356   | -0,01274403 |  |
| 203651_at    | ZFYVE16         | 2,218170265  | 2,230931691  | -0,01276143 |  |
| 1555939_at   | -               | -3,32387526  | -3,311072652 | -0,01280261 |  |
| 1561564_at   | -               | -3,32387526  | -3,311072652 | -0,01280261 |  |
| 213764_s_at  | MFAP5           | -3,32387526  | -3,311072652 | -0,01280261 |  |
| 227630_at    | PPP2R5E         | 2,122398022  | 2,135226207  | -0,01282818 |  |
| 226683_at    | SNX18           | 2,536956583  | 2,549796788  | -0,0128402  |  |
| 239206_at    | CR1L            | 1,799091453  | 1,811954245  | -0,01286279 |  |
| 226738_at    | WDR81           | 2,213529682  | 2,226407528  | -0,01287785 |  |

|              |                 |              |              |             |  |
|--------------|-----------------|--------------|--------------|-------------|--|
| 226297_at    | HIPK3           | 4,55296954   | 4,565857693  | -0,01288815 |  |
| 225703_at    | FBRSL1          | 3,671816548  | 3,684723168  | -0,01290662 |  |
| 211069_s_at  | SUMO1           | 5,412041769  | 5,424948779  | -0,01290701 |  |
| 219520_s_at  | WWC3            | 1,210676994  | 1,223626587  | -0,01294959 |  |
| 224558_s_at  | LOC100507645 /  | 4,549751571  | 4,562720691  | -0,01296912 |  |
| 227173_s_at  | BACH2           | 0,209623097  | 0,222599095  | -0,012976   |  |
| 213126_at    | MED8            | 1,530951994  | 1,543943227  | -0,01299123 |  |
| 236117_at    | -               | 2,206540699  | 2,21959457   | -0,01305387 |  |
| 236075_s_at  | LOC100506676    | 2,849652795  | 2,862725455  | -0,01307266 |  |
| 218388_at    | PGLS            | 3,526916747  | 3,540009821  | -0,01309307 |  |
| 212237_at    | ASXL1           | 2,109966786  | 2,123108223  | -0,01314144 |  |
| 213360_s_at  | POM121 /// POM  | 4,725862305  | 4,73902338   | -0,01316107 |  |
| 1554451_s_at | DNAJC14         | 1,201332287  | 1,214517879  | -0,01318559 |  |
| 204027_s_at  | METTL1          | 1,201332287  | 1,214517879  | -0,01318559 |  |
| 211584_s_at  | NPAT            | 1,201332287  | 1,214517879  | -0,01318559 |  |
| 212402_at    | ZC3H13          | 3,982575608  | 3,995764148  | -0,01318854 |  |
| 222606_at    | ZWILCH          | 4,770777552  | 4,783973541  | -0,01319599 |  |
| 216434_at    | TTC38           | 0,518867317  | 0,532164371  | -0,01329705 |  |
| 217593_at    | ZSCAN18         | 0,518867317  | 0,532164371  | -0,01329705 |  |
| 238775_at    | ITFG1           | 0,518867317  | 0,532164371  | -0,01329705 |  |
| 203246_s_at  | NPRL2           | 3,102740237  | 3,116064987  | -0,01332475 |  |
| 226154_at    | DNM1L           | 4,195216101  | 4,208556964  | -0,01334086 |  |
| 204435_at    | NUPL1           | 2,194816625  | 2,208167653  | -0,01335103 |  |
| 1561959_x_at | -               | -3,287237186 | -3,273861381 | -0,0133758  |  |
| 1570561_at   | -               | -3,287237186 | -3,273861381 | -0,0133758  |  |
| 220845_at    | ACOXL           | -3,287237186 | -3,273861381 | -0,0133758  |  |
| 214522_x_at  | HIST1H2AD /// H | 4,362800281  | 4,376200741  | -0,01340046 |  |
| 224657_at    | ERRFI1          | 2,512607472  | 2,526063925  | -0,01345645 |  |
| 225440_at    | AGPAT3          | 4,047898031  | 4,061373942  | -0,01347591 |  |
| 211762_s_at  | KPNA2           | 6,394368053  | 6,407847031  | -0,01347898 |  |
| 228839_s_at  | LOC642361       | 3,316904202  | 3,330438773  | -0,01353457 |  |
| 212496_s_at  | KDM4B           | 3,396853889  | 3,410394103  | -0,01354021 |  |
| 232737_s_at  | ENPP3           | 2,577249059  | 2,590852465  | -0,01360341 |  |
| 218168_s_at  | ADCK3           | 3,506195778  | 3,519816196  | -0,01362042 |  |
| 212450_at    | SECISBP2L       | 2,089851283  | 2,103505212  | -0,01365393 |  |
| 231402_at    | -               | 0,503742507  | 0,51742585   | -0,01368334 |  |
| 1569807_at   | -               | -0,234278768 | -0,220592223 | -0,01368654 |  |
| 205382_s_at  | CFD             | -0,234278768 | -0,220592223 | -0,01368654 |  |
| 217647_at    | -               | -0,234278768 | -0,220592223 | -0,01368654 |  |
| 223685_s_at  | PRPF18          | -0,234278768 | -0,220592223 | -0,01368654 |  |
| 229612_at    | -               | -0,234278768 | -0,220592223 | -0,01368654 |  |
| 231818_x_at  | -               | -0,234278768 | -0,220592223 | -0,01368654 |  |
| 232633_at    | XRCC5           | -0,234278768 | -0,220592223 | -0,01368654 |  |
| 225365_at    | ZDHHC20         | 3,96128107   | 3,975013041  | -0,01373197 |  |
| 228733_at    | PUSL1           | 2,084778276  | 2,098562556  | -0,01378428 |  |
| 213410_at    | C10orf137       | 3,345817457  | 3,359653127  | -0,01383567 |  |
| 1565717_s_at | FUS             | 4,34540724   | 4,359253484  | -0,01384624 |  |
| 242323_at    | PLA2G12A        | 3,032022986  | 3,045906378  | -0,01388339 |  |
| 216602_s_at  | FARSA           | 3,493810203  | 3,507749374  | -0,01393917 |  |
| 1560372_at   | -               | -3,250025915 | -3,236070201 | -0,01395571 |  |
| 1561069_at   | -               | -3,250025915 | -3,236070201 | -0,01395571 |  |
| 1562800_at   | -               | -3,250025915 | -3,236070201 | -0,01395571 |  |
| 222299_x_at  | -               | -3,250025915 | -3,236070201 | -0,01395571 |  |
| 240469_at    | -               | -3,250025915 | -3,236070201 | -0,01395571 |  |
| 241147_at    | -               | -3,250025915 | -3,236070201 | -0,01395571 |  |
| 205125_at    | PLCD1           | 1,493160564  | 1,507116528  | -0,01395596 |  |

|              |                  |              |              |             |  |
|--------------|------------------|--------------|--------------|-------------|--|
| 209654_at    | KIAA0947         | 3,630637368  | 3,644594022  | -0,01395665 |  |
| 222619_at    | ZNF281           | 3,170152481  | 3,184136378  | -0,0139839  |  |
| 208870_x_at  | ATP5C1           | 5,902611293  | 5,916653471  | -0,01404218 |  |
| 201052_s_at  | PSMF1            | 3,413135307  | 3,427247355  | -0,01411205 |  |
| 203679_at    | TMED1            | 4,779830653  | 4,79394496   | -0,01411431 |  |
| 227211_at    | PHF19            | 3,62365843   | 3,637795954  | -0,01413752 |  |
| 226770_at    | MAGI3            | 1,163336153  | 1,177496821  | -0,01416067 |  |
| 223120_at    | FUCA2            | 4,520462208  | 4,534633949  | -0,01417174 |  |
| 204725_s_at  | NCK1             | 2,250242994  | 2,264418116  | -0,01417512 |  |
| 226790_at    | MORN2            | 2,069451339  | 2,083632167  | -0,01418083 |  |
| 224947_at    | RNF26            | 2,331726354  | 2,345926937  | -0,01420058 |  |
| 201037_at    | PFKP             | 4,519052534  | 4,533260944  | -0,01420841 |  |
| 217140_s_at  | VDAC1            | 4,389788927  | 4,404011141  | -0,01422221 |  |
| 221940_at    | RPUSD2           | 2,064305961  | 2,078620836  | -0,01431488 |  |
| 205217_at    | TIMM8A           | 2,156646206  | 2,170981159  | -0,01433495 |  |
| 201600_at    | PHB2             | 6,275424489  | 6,289763693  | -0,0143392  |  |
| 218905_at    | INTS8            | 4,725862305  | 4,74021396   | -0,01435165 |  |
| 1555374_at   | -                | 0,962260738  | 0,976641161  | -0,01438042 |  |
| 203663_s_at  | COX5A            | 6,489927858  | 6,504376305  | -0,01444845 |  |
| 207438_s_at  | SNUPN            | 3,735513868  | 3,75000829   | -0,01449442 |  |
| 200088_x_at  | LOC648771 /// N  | 7,673686286  | 7,688191905  | -0,01450562 |  |
| 1560806_at   | LOC646743 /// TI | -0,926850548 | -0,912331589 | -0,01451896 |  |
| 1561459_at   | -                | -0,926850548 | -0,912331589 | -0,01451896 |  |
| 214028_x_at  | TDRD3            | -0,926850548 | -0,912331589 | -0,01451896 |  |
| 214236_at    | -                | -0,926850548 | -0,912331589 | -0,01451896 |  |
| 216329_at    | -                | -0,926850548 | -0,912331589 | -0,01451896 |  |
| 216762_at    | -                | -0,926850548 | -0,912331589 | -0,01451896 |  |
| 222046_at    | SRRT             | -0,926850548 | -0,912331589 | -0,01451896 |  |
| 228387_at    | -                | -0,926850548 | -0,912331589 | -0,01451896 |  |
| 230354_at    | -                | -0,926850548 | -0,912331589 | -0,01451896 |  |
| 231210_at    | C11orf85         | -0,926850548 | -0,912331589 | -0,01451896 |  |
| 232243_at    | MCPH1            | -0,926850548 | -0,912331589 | -0,01451896 |  |
| 233418_at    | LOC91450         | -0,926850548 | -0,912331589 | -0,01451896 |  |
| 235055_x_at  | MUC4             | -0,926850548 | -0,912331589 | -0,01451896 |  |
| 235212_at    | C14orf102        | -0,926850548 | -0,912331589 | -0,01451896 |  |
| 218528_s_at  | RNF38            | 3,358484112  | 3,373018423  | -0,01453431 |  |
| 200681_at    | GLO1             | 6,661906497  | 6,676514997  | -0,0146085  |  |
| 225298_at    | PNKD             | 2,952099138  | 2,966746113  | -0,01464698 |  |
| 221788_at    | PGM3             | 2,14450783   | 2,159161028  | -0,0146532  |  |
| 204370_at    | CLP1             | 4,166691359  | 4,181349409  | -0,01465805 |  |
| 206077_at    | KEL              | 1,46610492   | 1,480766833  | -0,01466191 |  |
| 228306_at    | CNIH4            | 1,46610492   | 1,480766833  | -0,01466191 |  |
| 225003_at    | TMEM205          | 5,273443519  | 5,288105861  | -0,01466234 |  |
| 204391_x_at  | TRIM24           | 4,570314367  | 4,584979629  | -0,01466526 |  |
| 203016_s_at  | SSX2IP           | 3,143564369  | 3,158242412  | -0,01467804 |  |
| 211328_x_at  | HFE              | 0,46522187   | 0,479907041  | -0,01468517 |  |
| 1552379_at   | RDH10            | -3,192553003 | -3,177802286 | -0,01475072 |  |
| 1555756_a_at | CLEC7A           | -3,192553003 | -3,177802286 | -0,01475072 |  |
| 1555926_a_at | -                | -3,192553003 | -3,177802286 | -0,01475072 |  |
| 1560066_at   | -                | -3,192553003 | -3,177802286 | -0,01475072 |  |
| 1560383_at   | LOC100506387     | -3,192553003 | -3,177802286 | -0,01475072 |  |
| 1565923_at   | -                | -3,192553003 | -3,177802286 | -0,01475072 |  |
| 1570355_a_at | DPY19L1          | -3,192553003 | -3,177802286 | -0,01475072 |  |
| 214254_at    | MAGEA4           | -3,192553003 | -3,177802286 | -0,01475072 |  |
| 244621_x_at  | -                | -3,192553003 | -3,177802286 | -0,01475072 |  |
| 218171_at    | VPS4B            | 3,310399576  | 3,325159096  | -0,01475952 |  |

|              |                |              |              |             |  |
|--------------|----------------|--------------|--------------|-------------|--|
| 204245_s_at  | RPP14          | 2,783874823  | 2,798646381  | -0,01477156 |  |
| 225995_x_at  | WASH1 /// WASH | 2,724770722  | 2,739547836  | -0,01477711 |  |
| 225777_at    | SAPCD2         | 2,663141434  | 2,677924589  | -0,01478316 |  |
| 235793_at    | -              | 1,139070151  | 1,153866761  | -0,01479661 |  |
| 215037_s_at  | BCL2L1         | 0,945567441  | 0,960386719  | -0,01481928 |  |
| 225245_x_at  | H2AFJ          | 4,06796029   | 4,082805739  | -0,01484545 |  |
| 217815_at    | SUPT16H        | 5,30704878   | 5,321896852  | -0,01484807 |  |
| 217982_s_at  | MORF4L1        | 6,798705596  | 6,813558862  | -0,01485327 |  |
| 217329_x_at  | -              | 4,34540724   | 4,360286277  | -0,01487904 |  |
| 225324_at    | CRLS1          | 3,992090425  | 4,007018329  | -0,0149279  |  |
| 207431_s_at  | DEGS1          | 3,49093683   | 3,505883949  | -0,01494712 |  |
| 204798_at    | MYB            | 6,341515089  | 6,356497318  | -0,01498223 |  |
| 229348_at    | UBIAD1         | 2,2992452    | 2,314300277  | -0,01505508 |  |
| 1556852_a_at | LOC100506609   | 1,129248302  | 1,144305291  | -0,01505699 |  |
| 1564356_at   | ZNF568         | 1,129248302  | 1,144305291  | -0,01505699 |  |
| 212976_at    | LRRC8B         | 1,129248302  | 1,144305291  | -0,01505699 |  |
| 211036_x_at  | ANAPC5         | 4,883890602  | 4,898954113  | -0,01506351 |  |
| 208336_s_at  | TECR           | 5,345732318  | 5,360860774  | -0,01512846 |  |
| 210104_at    | MED6           | 4,148572682  | 4,163710704  | -0,01513802 |  |
| 41858_at     | PGAP2          | 2,768928944  | 2,784097152  | -0,01516821 |  |
| 213969_x_at  | RPL29          | 7,658187996  | 7,673361925  | -0,01517393 |  |
| 1555226_s_at | C1orf43        | 4,332089668  | 4,347322916  | -0,01523325 |  |
| 222409_at    | CORO1C         | 5,9738003    | 5,989049182  | -0,01524888 |  |
| 201351_s_at  | YME1L1         | 5,261409968  | 5,276663999  | -0,01525403 |  |
| 212312_at    | BCL2L1         | 3,612245157  | 3,62753841   | -0,01529325 |  |
| 210254_at    | MS4A3          | 1,820612054  | 1,835911187  | -0,01529913 |  |
| 202975_s_at  | RHOBTB3        | 3,734704399  | 3,75000829   | -0,01530389 |  |
| 202328_s_at  | PKD1           | 0,44160593   | 0,456918297  | -0,01531237 |  |
| 1556849_at   | -              | -3,15396682  | -3,138626879 | -0,01533994 |  |
| 1557014_a_at | FAM201A        | -3,15396682  | -3,138626879 | -0,01533994 |  |
| 1559584_a_at | C16orf54       | -3,15396682  | -3,138626879 | -0,01533994 |  |
| 1566266_at   | -              | -3,15396682  | -3,138626879 | -0,01533994 |  |
| 1566637_at   | -              | -3,15396682  | -3,138626879 | -0,01533994 |  |
| 1569494_at   | MIPOL1         | -3,15396682  | -3,138626879 | -0,01533994 |  |
| 1569886_a_at | GLB1L3         | -3,15396682  | -3,138626879 | -0,01533994 |  |
| 1570575_at   | -              | -3,15396682  | -3,138626879 | -0,01533994 |  |
| 207678_s_at  | SOX30          | -3,15396682  | -3,138626879 | -0,01533994 |  |
| 216623_x_at  | TOX3           | -3,15396682  | -3,138626879 | -0,01533994 |  |
| 216672_s_at  | MYT1L          | -3,15396682  | -3,138626879 | -0,01533994 |  |
| 235118_at    | CADM2          | -3,15396682  | -3,138626879 | -0,01533994 |  |
| 236608_at    | GPR113         | -3,15396682  | -3,138626879 | -0,01533994 |  |
| 236637_at    | TAS2R14        | -3,15396682  | -3,138626879 | -0,01533994 |  |
| 237253_at    | IGSF11-AS1     | -3,15396682  | -3,138626879 | -0,01533994 |  |
| 239667_at    | SLC3A1         | -3,15396682  | -3,138626879 | -0,01533994 |  |
| 240433_x_at  | CADM2          | -3,15396682  | -3,138626879 | -0,01533994 |  |
| 240442_at    | -              | -3,15396682  | -3,138626879 | -0,01533994 |  |
| 242248_at    | PHKB           | -3,15396682  | -3,138626879 | -0,01533994 |  |
| 242795_at    | -              | -3,15396682  | -3,138626879 | -0,01533994 |  |
| 1554119_at   | C16orf57       | -0,299034815 | -0,283667828 | -0,01536699 |  |
| 1558975_at   | FAM100A        | -0,299034815 | -0,283667828 | -0,01536699 |  |
| 1569349_at   | C11orf30       | -0,299034815 | -0,283667828 | -0,01536699 |  |
| 217646_at    | SURF1          | -0,299034815 | -0,283667828 | -0,01536699 |  |
| 238811_at    | ATP11B         | -0,299034815 | -0,283667828 | -0,01536699 |  |
| 239112_at    | -              | -0,299034815 | -0,283667828 | -0,01536699 |  |
| 243255_at    | -              | -0,299034815 | -0,283667828 | -0,01536699 |  |
| 201753_s_at  | ADD3           | 4,343815608  | 4,359253484  | -0,01543788 |  |

|              |              |              |              |             |  |
|--------------|--------------|--------------|--------------|-------------|--|
| 1568987_at   | MGC57346     | 1,114389003  | 1,129843209  | -0,01545421 |  |
| 242692_at    | -            | 1,114389003  | 1,129843209  | -0,01545421 |  |
| 224630_at    | ERLEC1       | 3,943876123  | 3,959421856  | -0,01554573 |  |
| 219242_at    | CEP63        | 1,69307511   | 1,708698295  | -0,01562318 |  |
| 209702_at    | FTO          | 3,152077493  | 3,16771226   | -0,01563477 |  |
| 217777_s_at  | PTPLAD1      | 3,888182512  | 3,903840511  | -0,015658   |  |
| 210139_s_at  | PMP22        | 5,08337493   | 5,099052587  | -0,01567766 |  |
| 209080_x_at  | GLRX3        | 5,858148329  | 5,873902629  | -0,0157543  |  |
| 202926_at    | NBAS         | 2,857110344  | 2,87289275   | -0,01578241 |  |
| 208852_s_at  | CANX         | 4,758883134  | 4,77470758   | -0,01582445 |  |
| 202391_at    | BASP1        | 3,744388178  | 3,760216412  | -0,01582823 |  |
| 225276_at    | GSPT1        | 2,003776245  | 2,019703483  | -0,01592724 |  |
| 1553915_at   | C10orf126    | -3,114791413 | -3,098858316 | -0,0159331  |  |
| 1555103_s_at | FGF7         | -3,114791413 | -3,098858316 | -0,0159331  |  |
| 1560494_a_at | CPXCR1       | -3,114791413 | -3,098858316 | -0,0159331  |  |
| 1561562_at   | -            | -3,114791413 | -3,098858316 | -0,0159331  |  |
| 1566324_a_at | MAF          | -3,114791413 | -3,098858316 | -0,0159331  |  |
| 206950_at    | SCN9A        | -3,114791413 | -3,098858316 | -0,0159331  |  |
| 212681_at    | EPB41L3      | -3,114791413 | -3,098858316 | -0,0159331  |  |
| 215663_at    | MBNL1        | -3,114791413 | -3,098858316 | -0,0159331  |  |
| 216462_at    | -            | -3,114791413 | -3,098858316 | -0,0159331  |  |
| 220810_at    | CLCA3P       | -3,114791413 | -3,098858316 | -0,0159331  |  |
| 222940_at    | SULT1E1      | -3,114791413 | -3,098858316 | -0,0159331  |  |
| 224167_at    | SPZ1         | -3,114791413 | -3,098858316 | -0,0159331  |  |
| 233789_at    | -            | -3,114791413 | -3,098858316 | -0,0159331  |  |
| 236335_at    | GUCY1A2      | -3,114791413 | -3,098858316 | -0,0159331  |  |
| 240915_at    | IGHV1-69     | -3,114791413 | -3,098858316 | -0,0159331  |  |
| 241796_x_at  | -            | -3,114791413 | -3,098858316 | -0,0159331  |  |
| 225232_at    | MTMR12       | 3,588248178  | 3,604188755  | -0,01594058 |  |
| 1554424_at   | FIP1L1       | 0,417596971  | 0,433557298  | -0,01596033 |  |
| 229633_at    | INTS10       | 0,417596971  | 0,433557298  | -0,01596033 |  |
| 218341_at    | PPCS         | 2,094906514  | 2,110887591  | -0,01598108 |  |
| 227129_x_at  | FLJ45340     | 2,901063789  | 2,917077481  | -0,01601369 |  |
| 214857_at    | LOC100505761 | 1,414471577  | 1,43051703   | -0,01604545 |  |
| 220761_s_at  | TAOK3        | 4,114129991  | 4,130196752  | -0,01606676 |  |
| 210480_s_at  | MYO6         | 0,67554678   | 0,691645685  | -0,01609891 |  |
| 210379_s_at  | TLK1         | 1,089278259  | 1,105412836  | -0,01613458 |  |
| 221610_s_at  | STAP2        | 1,089278259  | 1,105412836  | -0,01613458 |  |
| 200940_s_at  | RERE         | 3,298397722  | 3,314541423  | -0,0161437  |  |
| 219078_at    | GPATCH2      | 1,995690482  | 2,011838132  | -0,01614765 |  |
| 219983_at    | HRASLS       | 2,787001691  | 2,803210557  | -0,01620887 |  |
| 231041_at    | POLR1E       | 0,888485433  | 0,904843258  | -0,01635783 |  |
| 1560128_x_at | C5orf56      | -1,026571149 | -1,010192375 | -0,01637877 |  |
| 203948_s_at  | MPO          | -1,026571149 | -1,010192375 | -0,01637877 |  |
| 204072_s_at  | FRY          | -1,026571149 | -1,010192375 | -0,01637877 |  |
| 206259_at    | PROC         | -1,026571149 | -1,010192375 | -0,01637877 |  |
| 207466_at    | GAL          | -1,026571149 | -1,010192375 | -0,01637877 |  |
| 210961_s_at  | ADRA1D       | -1,026571149 | -1,010192375 | -0,01637877 |  |
| 211900_x_at  | CD6          | -1,026571149 | -1,010192375 | -0,01637877 |  |
| 213874_at    | SERPINA4     | -1,026571149 | -1,010192375 | -0,01637877 |  |
| 214815_at    | TRIM33       | -1,026571149 | -1,010192375 | -0,01637877 |  |
| 215839_at    | LILRA5       | -1,026571149 | -1,010192375 | -0,01637877 |  |
| 220272_at    | BNC2         | -1,026571149 | -1,010192375 | -0,01637877 |  |
| 227706_at    | SPIRE2       | -1,026571149 | -1,010192375 | -0,01637877 |  |
| 236428_at    | -            | -1,026571149 | -1,010192375 | -0,01637877 |  |
| 236990_at    | LOC100507360 | -1,026571149 | -1,010192375 | -0,01637877 |  |

|              |                  |              |              |             |  |
|--------------|------------------|--------------|--------------|-------------|--|
| 241466_at    | -                | -1,026571149 | -1,010192375 | -0,01637877 |  |
| 243382_at    | CCDC85A          | -1,026571149 | -1,010192375 | -0,01637877 |  |
| 244100_at    | -                | -1,026571149 | -1,010192375 | -0,01637877 |  |
| 244603_at    | -                | -1,026571149 | -1,010192375 | -0,01637877 |  |
| 201390_s_at  | CSNK2B           | 5,861489288  | 5,877874624  | -0,01638534 |  |
| 202540_s_at  | HMGCR            | 4,034147209  | 4,050537457  | -0,01639025 |  |
| 238773_at    | METTL15          | 1,780386218  | 1,796776588  | -0,01639037 |  |
| 200819_s_at  | RPS15            | 7,961298109  | 7,977724004  | -0,0164259  |  |
| 242655_at    | BARD1            | 0,984222186  | 1,000684521  | -0,01646234 |  |
| 228992_at    | MED28            | 3,600740871  | 3,617207412  | -0,01646654 |  |
| 221842_s_at  | LOC100506639 /   | 2,983784569  | 3,000258961  | -0,01647439 |  |
| 205664_at    | KIN              | 3,32445605   | 3,340940512  | -0,01648446 |  |
| 204263_s_at  | CPT2             | 1,883312263  | 1,899812471  | -0,01650021 |  |
| 227131_at    | MAP3K3           | 2,774453351  | 2,791007185  | -0,01655383 |  |
| 228714_at    | -                | 1,073999308  | 1,090553537  | -0,01655423 |  |
| 231769_at    | FBXO6            | 1,073999308  | 1,090553537  | -0,01655423 |  |
| 206951_at    | HIST1H4A /// HIS | 1,394109935  | 1,410714371  | -0,01660444 |  |
| 209799_at    | PRKAA1           | 1,394109935  | 1,410714371  | -0,01660444 |  |
| 201848_s_at  | BNIP3            | 2,874852734  | 2,891586849  | -0,01673411 |  |
| 1555718_x_at | -                | -3,054236653 | -3,037500868 | -0,01673578 |  |
| 1559965_at   | ZFHX4-AS1        | -3,054236653 | -3,037500868 | -0,01673578 |  |
| 1560791_at   | -                | -3,054236653 | -3,037500868 | -0,01673578 |  |
| 1561213_at   | -                | -3,054236653 | -3,037500868 | -0,01673578 |  |
| 1563335_at   | IRGM             | -3,054236653 | -3,037500868 | -0,01673578 |  |
| 1569784_at   | -                | -3,054236653 | -3,037500868 | -0,01673578 |  |
| 207928_s_at  | GLRA3            | -3,054236653 | -3,037500868 | -0,01673578 |  |
| 211155_s_at  | THPO             | -3,054236653 | -3,037500868 | -0,01673578 |  |
| 211164_at    | EPHA3            | -3,054236653 | -3,037500868 | -0,01673578 |  |
| 217345_at    | -                | -3,054236653 | -3,037500868 | -0,01673578 |  |
| 228821_at    | ST6GAL2          | -3,054236653 | -3,037500868 | -0,01673578 |  |
| 234808_x_at  | -                | -3,054236653 | -3,037500868 | -0,01673578 |  |
| 236999_at    | PPWD1            | -3,054236653 | -3,037500868 | -0,01673578 |  |
| 237984_x_at  | -                | -3,054236653 | -3,037500868 | -0,01673578 |  |
| 239806_at    | -                | -3,054236653 | -3,037500868 | -0,01673578 |  |
| 241265_x_at  | -                | -3,054236653 | -3,037500868 | -0,01673578 |  |
| 243040_at    | -                | -3,054236653 | -3,037500868 | -0,01673578 |  |
| 243257_at    | -                | -3,054236653 | -3,037500868 | -0,01673578 |  |
| 244111_at    | KRT222           | -3,054236653 | -3,037500868 | -0,01673578 |  |
| 244412_at    | -                | -3,054236653 | -3,037500868 | -0,01673578 |  |
| 201613_s_at  | AP1G2            | 2,314494121  | 2,331254065  | -0,01675994 |  |
| 226875_at    | DOCK11           | 3,55745065   | 3,574237491  | -0,01678684 |  |
| 202014_at    | PPP1R15A         | 2,922548342  | 2,939363796  | -0,01681545 |  |
| 203753_at    | TCF4             | 1,764611101  | 1,781437557  | -0,01682646 |  |
| 1554468_s_at | MRPL38           | 1,063722698  | 1,080561626  | -0,01683893 |  |
| 217894_at    | KCTD3            | 1,063722698  | 1,080561626  | -0,01683893 |  |
| 232478_at    | MIR181A2HG       | 1,063722698  | 1,080561626  | -0,01683893 |  |
| 202061_s_at  | SEL1L            | 3,676882273  | 3,693764321  | -0,01688205 |  |
| 223180_s_at  | TIMM21           | 5,027297124  | 5,044197531  | -0,01690041 |  |
| 210183_x_at  | PNN              | 6,351449883  | 6,368352567  | -0,01690268 |  |
| 227936_at    | TMEM68           | 2,918276951  | 2,935211251  | -0,0169343  |  |
| 213026_at    | ATG12            | 2,450859799  | 2,467842989  | -0,01698319 |  |
| 218089_at    | C20orf4          | 3,22766727   | 3,244672787  | -0,01700552 |  |
| 228089_x_at  | TMEM179B         | 2,81177561   | 2,828804976  | -0,01702937 |  |
| 215190_at    | EIF3M            | 0,641402394  | 0,658444279  | -0,01704188 |  |
| 216694_at    | -                | 0,641402394  | 0,658444279  | -0,01704188 |  |
| 217007_s_at  | ADAM15           | 0,641402394  | 0,658444279  | -0,01704188 |  |

|              |                  |              |              |             |  |
|--------------|------------------|--------------|--------------|-------------|--|
| 230541_at    | LOC149134        | 0,641402394  | 0,658444279  | -0,01704188 |  |
| 208798_x_at  | GOLGA8A          | 3,700289946  | 3,717332003  | -0,01704206 |  |
| 1553499_s_at | SERPINA9         | 0,376672223  | 0,393761504  | -0,01708928 |  |
| 219801_at    | ZNF34            | 0,376672223  | 0,393761504  | -0,01708928 |  |
| 220465_at    | LOC80054         | 0,376672223  | 0,393761504  | -0,01708928 |  |
| 229405_at    | KIF7             | 0,376672223  | 0,393761504  | -0,01708928 |  |
| 230376_at    | GTF2A2           | 0,376672223  | 0,393761504  | -0,01708928 |  |
| 201751_at    | JOSD1            | 3,098971025  | 3,116064987  | -0,01709396 |  |
| 212936_at    | FAM172A          | 2,37600538   | 2,39311332   | -0,01710794 |  |
| 209155_s_at  | NT5C2            | 3,834791978  | 3,85191797   | -0,01712599 |  |
| 218280_x_at  | HIST2H2AA3 /// H | 6,467873458  | 6,485035874  | -0,01716242 |  |
| 1570167_at   | -                | -0,366776884 | -0,34958478  | -0,0171921  |  |
| 206847_s_at  | HOXA7            | -0,366776884 | -0,34958478  | -0,0171921  |  |
| 207360_s_at  | NTSR1            | -0,366776884 | -0,34958478  | -0,0171921  |  |
| 219471_at    | KIAA0226L        | -0,366776884 | -0,34958478  | -0,0171921  |  |
| 224554_at    | GHSR             | -0,366776884 | -0,34958478  | -0,0171921  |  |
| 228625_at    | CITED4           | -0,366776884 | -0,34958478  | -0,0171921  |  |
| 243411_at    | POLDIP3          | -0,366776884 | -0,34958478  | -0,0171921  |  |
| 220233_at    | FBXO17 /// SARS  | 2,220484971  | 2,237691445  | -0,01720647 |  |
| 210983_s_at  | MCM7             | 4,389274648  | 4,406512977  | -0,01723833 |  |
| 204109_s_at  | NFYA             | 2,048758794  | 2,066015817  | -0,01725702 |  |
| 214993_at    | ASPHD1           | 1,04816921   | 1,065442793  | -0,01727358 |  |
| 203198_at    | CDK9             | 1,631786706  | 1,64909809   | -0,01731138 |  |
| 208972_s_at  | ATP5G1           | 4,854012234  | 4,871328311  | -0,01731608 |  |
| 1559285_at   | -                | -3,013665402 | -2,996335703 | -0,0173297  |  |
| 1559678_s_at | LOC100652791 /   | -3,013665402 | -2,996335703 | -0,0173297  |  |
| 1567861_at   | DNAH14           | -3,013665402 | -2,996335703 | -0,0173297  |  |
| 1569599_at   | SAMSN1           | -3,013665402 | -2,996335703 | -0,0173297  |  |
| 1569955_at   | -                | -3,013665402 | -2,996335703 | -0,0173297  |  |
| 206898_at    | CDH19            | -3,013665402 | -2,996335703 | -0,0173297  |  |
| 208143_s_at  | EDDM3A           | -3,013665402 | -2,996335703 | -0,0173297  |  |
| 222150_s_at  | PION             | -3,013665402 | -2,996335703 | -0,0173297  |  |
| 227827_at    | -                | -3,013665402 | -2,996335703 | -0,0173297  |  |
| 231630_at    | -                | -3,013665402 | -2,996335703 | -0,0173297  |  |
| 237390_at    | -                | -3,013665402 | -2,996335703 | -0,0173297  |  |
| 237859_at    | -                | -3,013665402 | -2,996335703 | -0,0173297  |  |
| 237962_x_at  | -                | -3,013665402 | -2,996335703 | -0,0173297  |  |
| 240348_at    | -                | -3,013665402 | -2,996335703 | -0,0173297  |  |
| 241260_at    | -                | -3,013665402 | -2,996335703 | -0,0173297  |  |
| 242321_at    | PTPN14           | -3,013665402 | -2,996335703 | -0,0173297  |  |
| 223367_at    | DNAJC30          | 2,365585359  | 2,382985886  | -0,01740053 |  |
| 223728_at    | CENPBD1          | 2,213529682  | 2,230931691  | -0,01740201 |  |
| 225424_at    | GPAM             | 2,213529682  | 2,230931691  | -0,01740201 |  |
| 213377_x_at  | RPS12            | 7,918634015  | 7,936077964  | -0,01744395 |  |
| 229050_s_at  | SNHG7 /// SNOR   | 2,945117939  | 2,962671751  | -0,01755381 |  |
| 1553845_x_at | C10orf67         | 0,359971644  | 0,377530647  | -0,017559   |  |
| 221552_at    | ABHD6            | 0,359971644  | 0,377530647  | -0,017559   |  |
| 232004_at    | HNRNPR           | 1,037706275  | 1,055274826  | -0,01756855 |  |
| 201375_s_at  | PPP2CB           | 5,614596381  | 5,632180175  | -0,01758379 |  |
| 214023_x_at  | TUBB2B           | 3,461883885  | 3,479511525  | -0,01762764 |  |
| 210840_s_at  | IQGAP1           | 2,493593689  | 2,511262629  | -0,01766894 |  |
| 201122_x_at  | EIF5A            | 5,940488937  | 5,958173867  | -0,01768493 |  |
| 229676_at    | MTPAP            | 2,840652551  | 2,858346012  | -0,01769346 |  |
| 219053_s_at  | VPS37C           | 3,030704581  | 3,048471686  | -0,0177671  |  |
| 1559382_at   | C19orf42         | 1,352503698  | 1,370274469  | -0,01777077 |  |
| 211851_x_at  | BRCA1            | 1,352503698  | 1,370274469  | -0,01777077 |  |



|              |                             |              |              |             |  |
|--------------|-----------------------------|--------------|--------------|-------------|--|
| 216678_at    | IFT122                      | 1,352503698  | 1,370274469  | -0,01777077 |  |
| 218202_x_at  | MRPL44                      | 1,352503698  | 1,370274469  | -0,01777077 |  |
| 225860_at    | -                           | 1,352503698  | 1,370274469  | -0,01777077 |  |
| 229741_at    | MAVS                        | 1,352503698  | 1,370274469  | -0,01777077 |  |
| 202726_at    | LIG1                        | 2,553576109  | 2,571362843  | -0,01778673 |  |
| 202259_s_at  | N4BP2L2                     | 2,549899391  | 2,567790814  | -0,01789142 |  |
| 207469_s_at  | PIR                         | 1,932146506  | 1,950068772  | -0,01792227 |  |
| 1552439_s_at | MEGF11                      | -2,972500237 | -2,954576755 | -0,01792348 |  |
| 1554564_a_at | SPPL3                       | -2,972500237 | -2,954576755 | -0,01792348 |  |
| 1556625_a_at | -                           | -2,972500237 | -2,954576755 | -0,01792348 |  |
| 1557717_at   | LINC00550                   | -2,972500237 | -2,954576755 | -0,01792348 |  |
| 1558797_at   | -                           | -2,972500237 | -2,954576755 | -0,01792348 |  |
| 1560419_at   | LOC100127974                | -2,972500237 | -2,954576755 | -0,01792348 |  |
| 1560426_at   | C12orf55 /// C12orf55       | -2,972500237 | -2,954576755 | -0,01792348 |  |
| 1562613_at   | -                           | -2,972500237 | -2,954576755 | -0,01792348 |  |
| 1563797_at   | -                           | -2,972500237 | -2,954576755 | -0,01792348 |  |
| 1564359_a_at | LOC339260                   | -2,972500237 | -2,954576755 | -0,01792348 |  |
| 1568936_a_at | -                           | -2,972500237 | -2,954576755 | -0,01792348 |  |
| 1570115_at   | PP12708                     | -2,972500237 | -2,954576755 | -0,01792348 |  |
| 205413_at    | MPPED2                      | -2,972500237 | -2,954576755 | -0,01792348 |  |
| 207867_at    | PAX4                        | -2,972500237 | -2,954576755 | -0,01792348 |  |
| 210035_s_at  | RPL5 /// SNORA68            | -2,972500237 | -2,954576755 | -0,01792348 |  |
| 211179_at    | LOC100506403 / LOC100506403 | -2,972500237 | -2,954576755 | -0,01792348 |  |
| 214034_at    | ERAP1                       | -2,972500237 | -2,954576755 | -0,01792348 |  |
| 217220_at    | LOC100287387                | -2,972500237 | -2,954576755 | -0,01792348 |  |
| 217536_x_at  | -                           | -2,972500237 | -2,954576755 | -0,01792348 |  |
| 221170_at    | HRH4                        | -2,972500237 | -2,954576755 | -0,01792348 |  |
| 222073_at    | COL4A3                      | -2,972500237 | -2,954576755 | -0,01792348 |  |
| 223841_s_at  | SPATA9                      | -2,972500237 | -2,954576755 | -0,01792348 |  |
| 233238_s_at  | -                           | -2,972500237 | -2,954576755 | -0,01792348 |  |
| 235385_at    | 01.03.15                    | -2,972500237 | -2,954576755 | -0,01792348 |  |
| 236936_at    | -                           | -2,972500237 | -2,954576755 | -0,01792348 |  |
| 237449_at    | SP8                         | -2,972500237 | -2,954576755 | -0,01792348 |  |
| 237956_s_at  | C5orf58                     | -2,972500237 | -2,954576755 | -0,01792348 |  |
| 238399_x_at  | -                           | -2,972500237 | -2,954576755 | -0,01792348 |  |
| 238899_at    | -                           | -2,972500237 | -2,954576755 | -0,01792348 |  |
| 240563_at    | -                           | -2,972500237 | -2,954576755 | -0,01792348 |  |
| 240676_at    | -                           | -2,972500237 | -2,954576755 | -0,01792348 |  |
| 241186_at    | -                           | -2,972500237 | -2,954576755 | -0,01792348 |  |
| 241643_at    | TLK1                        | -2,972500237 | -2,954576755 | -0,01792348 |  |
| 205956_x_at  | PSMC3IP                     | 2,194816625  | 2,212749286  | -0,01793266 |  |
| 201967_at    | RBM6                        | 2,882181479  | 2,900133867  | -0,01795239 |  |
| 206752_s_at  | DFFB                        | 2,022468633  | 2,040470494  | -0,01800186 |  |
| 225358_at    | DNAJC19                     | 2,022468633  | 2,040470494  | -0,01800186 |  |
| 235693_at    | -                           | 2,022468633  | 2,040470494  | -0,01800186 |  |
| 204483_at    | ENO3                        | 1,021868205  | 1,039887232  | -0,01801903 |  |
| 227581_at    | TECPR1                      | 1,021868205  | 1,039887232  | -0,01801903 |  |
| 228919_at    | -                           | 0,82905153   | 0,847075464  | -0,01802393 |  |
| 1558459_s_at | LOC401320                   | 0,606430281  | 0,624460759  | -0,01803048 |  |
| 210224_at    | MR1                         | 0,606430281  | 0,624460759  | -0,01803048 |  |
| 231419_at    | LOC100505555                | 0,606430281  | 0,624460759  | -0,01803048 |  |
| 200615_s_at  | AP2B1                       | 3,41111015   | 3,429217209  | -0,01810706 |  |
| 201267_s_at  | PSMC3                       | 4,586556157  | 4,604723207  | -0,01816705 |  |
| 203250_at    | SCAF8                       | 4,586556157  | 4,604723207  | -0,01816705 |  |
| 1553171_x_at | LRRN4                       | -1,131062212 | -1,112851844 | -0,01821037 |  |
| 1553204_at   | C20orf166-AS1               | -1,131062212 | -1,112851844 | -0,01821037 |  |

|              |                  |              |              |             |  |
|--------------|------------------|--------------|--------------|-------------|--|
| 1553396_a_at | CCDC13           | -1,131062212 | -1,112851844 | -0,01821037 |  |
| 1553917_at   | PIKFYVE          | -1,131062212 | -1,112851844 | -0,01821037 |  |
| 1555464_at   | IFIH1            | -1,131062212 | -1,112851844 | -0,01821037 |  |
| 1561539_at   | LOC100506368     | -1,131062212 | -1,112851844 | -0,01821037 |  |
| 1563081_at   | -                | -1,131062212 | -1,112851844 | -0,01821037 |  |
| 1564291_at   | -                | -1,131062212 | -1,112851844 | -0,01821037 |  |
| 202921_s_at  | ANK2             | -1,131062212 | -1,112851844 | -0,01821037 |  |
| 214516_at    | HIST1H4A /// HIS | -1,131062212 | -1,112851844 | -0,01821037 |  |
| 220404_at    | GPR97            | -1,131062212 | -1,112851844 | -0,01821037 |  |
| 220521_s_at  | ATG16L1          | -1,131062212 | -1,112851844 | -0,01821037 |  |
| 226218_at    | IL7R             | -1,131062212 | -1,112851844 | -0,01821037 |  |
| 231667_at    | SLC39A5          | -1,131062212 | -1,112851844 | -0,01821037 |  |
| 232109_at    | UBXN10           | -1,131062212 | -1,112851844 | -0,01821037 |  |
| 232479_at    | FERMT1           | -1,131062212 | -1,112851844 | -0,01821037 |  |
| 233121_at    | -                | -1,131062212 | -1,112851844 | -0,01821037 |  |
| 234037_s_at  | -                | -1,131062212 | -1,112851844 | -0,01821037 |  |
| 234053_at    | -                | -1,131062212 | -1,112851844 | -0,01821037 |  |
| 236986_at    | LINC00582        | -1,131062212 | -1,112851844 | -0,01821037 |  |
| 239160_at    | -                | -1,131062212 | -1,112851844 | -0,01821037 |  |
| 243055_at    | -                | -1,131062212 | -1,112851844 | -0,01821037 |  |
| 201833_at    | HDAC2            | 5,582563715  | 5,60084548   | -0,01828176 |  |
| 203861_s_at  | ACTN2            | 0,334552598  | 0,352836757  | -0,01828416 |  |
| 206701_x_at  | EDNRB            | 0,334552598  | 0,352836757  | -0,01828416 |  |
| 222060_at    | KRT8P12          | 0,334552598  | 0,352836757  | -0,01828416 |  |
| 238902_at    | -                | 0,334552598  | 0,352836757  | -0,01828416 |  |
| 222469_s_at  | TOLLIP           | 1,011212064  | 1,029536893  | -0,01832483 |  |
| 213226_at    | CCNA2            | 4,580712136  | 4,599047207  | -0,01833507 |  |
| 208627_s_at  | YBX1             | 7,182997545  | 7,201340869  | -0,01834332 |  |
| 227388_at    | TUSC1            | 4,368029766  | 4,386375749  | -0,01834598 |  |
| 212166_at    | XPO7             | 3,097712429  | 3,116064987  | -0,01835256 |  |
| 222688_at    | ACER3            | 1,331241794  | 1,349621332  | -0,01837954 |  |
| 200771_at    | LAMC1            | 3,681090166  | 3,69948842   | -0,01839825 |  |
| 225836_s_at  | C12orf32         | 2,178241192  | 2,196649505  | -0,01840831 |  |
| 225862_at    | SLC25A26         | 2,531373922  | 2,549796788  | -0,01842287 |  |
| 217810_x_at  | LARS             | 4,047898031  | 4,066445436  | -0,0185474  |  |
| 202554_s_at  | GSTM3            | 5,452973635  | 5,471571483  | -0,01859785 |  |
| 213708_s_at  | MLX              | 3,729025365  | 3,747642277  | -0,01861691 |  |
| 221427_s_at  | CCNL2            | 2,001086023  | 2,019703483  | -0,01861746 |  |
| 236957_at    | CDCA2            | 2,001086023  | 2,019703483  | -0,01861746 |  |
| 211501_s_at  | EIF3B            | 3,582860873  | 3,601570866  | -0,01870999 |  |
| 1556454_a_at | LOC100506274     | -2,908843709 | -2,89013181  | -0,0187119  |  |
| 1559221_at   | LOC100507254     | -2,908843709 | -2,89013181  | -0,0187119  |  |
| 1560142_at   | GRIK2            | -2,908843709 | -2,89013181  | -0,0187119  |  |
| 1563963_at   | -                | -2,908843709 | -2,89013181  | -0,0187119  |  |
| 1569988_at   | -                | -2,908843709 | -2,89013181  | -0,0187119  |  |
| 1570621_at   | -                | -2,908843709 | -2,89013181  | -0,0187119  |  |
| 202015_x_at  | -                | -2,908843709 | -2,89013181  | -0,0187119  |  |
| 208411_x_at  | PPEF2            | -2,908843709 | -2,89013181  | -0,0187119  |  |
| 211170_s_at  | PDE10A           | -2,908843709 | -2,89013181  | -0,0187119  |  |
| 212560_at    | SORL1            | -2,908843709 | -2,89013181  | -0,0187119  |  |
| 214591_at    | KLHL4            | -2,908843709 | -2,89013181  | -0,0187119  |  |
| 216443_at    | -                | -2,908843709 | -2,89013181  | -0,0187119  |  |
| 229459_at    | FAM19A5          | -2,908843709 | -2,89013181  | -0,0187119  |  |
| 231294_at    | -                | -2,908843709 | -2,89013181  | -0,0187119  |  |
| 232618_at    | TXLNG2P          | -2,908843709 | -2,89013181  | -0,0187119  |  |
| 233415_at    | -                | -2,908843709 | -2,89013181  | -0,0187119  |  |

|              |              |              |              |             |  |
|--------------|--------------|--------------|--------------|-------------|--|
| 234478_at    | -            | -2,908843709 | -2,89013181  | -0,0187119  |  |
| 236644_at    | RNF180       | -2,908843709 | -2,89013181  | -0,0187119  |  |
| 237206_at    | MYOCD        | -2,908843709 | -2,89013181  | -0,0187119  |  |
| 240326_at    | -            | -2,908843709 | -2,89013181  | -0,0187119  |  |
| 241070_at    | -            | -2,908843709 | -2,89013181  | -0,0187119  |  |
| 242840_at    | -            | -2,908843709 | -2,89013181  | -0,0187119  |  |
| 243427_at    | -            | -2,908843709 | -2,89013181  | -0,0187119  |  |
| 243753_at    | C1orf173     | -2,908843709 | -2,89013181  | -0,0187119  |  |
| 244119_at    | LINC00551    | -2,908843709 | -2,89013181  | -0,0187119  |  |
| 1555390_at   | NOP9         | 0,317354302  | 0,336136178  | -0,01878188 |  |
| 219472_at    | CENPO        | 0,317354302  | 0,336136178  | -0,01878188 |  |
| 224055_x_at  | KCNK7        | 0,317354302  | 0,336136178  | -0,01878188 |  |
| 215404_x_at  | FGFR1        | 0,995078803  | 1,013870809  | -0,01879201 |  |
| 223407_at    | C16orf48     | 0,995078803  | 1,013870809  | -0,01879201 |  |
| 227599_at    | MB21D2       | 0,995078803  | 1,013870809  | -0,01879201 |  |
| 238949_at    | RNF145       | 0,995078803  | 1,013870809  | -0,01879201 |  |
| 203253_s_at  | PPIP5K2      | 4,609698349  | 4,628492984  | -0,01879464 |  |
| 1554664_at   | NAIF1        | -1,173767127 | -1,154897679 | -0,01886945 |  |
| 1559507_at   | LOC100130357 | -1,173767127 | -1,154897679 | -0,01886945 |  |
| 1561126_at   | -            | -1,173767127 | -1,154897679 | -0,01886945 |  |
| 208564_at    | KCNA2        | -1,173767127 | -1,154897679 | -0,01886945 |  |
| 210763_x_at  | NCR3         | -1,173767127 | -1,154897679 | -0,01886945 |  |
| 215678_at    | LOC440792    | -1,173767127 | -1,154897679 | -0,01886945 |  |
| 221345_at    | FFAR2        | -1,173767127 | -1,154897679 | -0,01886945 |  |
| 227480_at    | SUSD2        | -1,173767127 | -1,154897679 | -0,01886945 |  |
| 232487_at    | SFT2D1       | -1,173767127 | -1,154897679 | -0,01886945 |  |
| 233811_at    | RIN2         | -1,173767127 | -1,154897679 | -0,01886945 |  |
| 233963_at    | H2BFXP       | -1,173767127 | -1,154897679 | -0,01886945 |  |
| 236437_at    | -            | -1,173767127 | -1,154897679 | -0,01886945 |  |
| 237168_at    | -            | -1,173767127 | -1,154897679 | -0,01886945 |  |
| 238831_at    | TMEM33       | -1,173767127 | -1,154897679 | -0,01886945 |  |
| 239241_at    | LOC727869    | -1,173767127 | -1,154897679 | -0,01886945 |  |
| 239249_at    | -            | -1,173767127 | -1,154897679 | -0,01886945 |  |
| 240532_at    | SLC32A1      | -1,173767127 | -1,154897679 | -0,01886945 |  |
| 241491_at    | -            | -1,173767127 | -1,154897679 | -0,01886945 |  |
| 241837_at    | -            | -1,173767127 | -1,154897679 | -0,01886945 |  |
| 201336_at    | VAMP3        | 4,837895809  | 4,85676571   | -0,0188699  |  |
| 226038_at    | LONRF1       | 3,078700536  | 3,09760452   | -0,01890398 |  |
| 229848_at    | ZNF10        | 0,798390451  | 0,817300337  | -0,01890989 |  |
| 238785_at    | -            | 0,798390451  | 0,817300337  | -0,01890989 |  |
| 219412_at    | RAB38        | 3,199783157  | 3,218713651  | -0,01893049 |  |
| 242761_s_at  | ZNF420       | 4,449221925  | 4,468168179  | -0,01894625 |  |
| 1560339_s_at | NAP1L4       | 3,84757742   | 3,866529339  | -0,01895192 |  |
| 227728_at    | PPM1A        | 1,987559146  | 2,006570641  | -0,01901149 |  |
| 208727_s_at  | CDC42        | 4,361752105  | 4,380788377  | -0,01903627 |  |
| 219613_s_at  | SIRT6        | 0,57058931   | 0,589657387  | -0,01906808 |  |
| 207956_x_at  | PDS5B        | 3,891817836  | 3,910906416  | -0,01908858 |  |
| 211982_x_at  | XPO6         | 3,443176398  | 3,462299654  | -0,01912326 |  |
| 227442_at    | COX18        | 2,683419202  | 2,702564916  | -0,01914571 |  |
| 222939_s_at  | SLC16A10     | 3,889637741  | 3,908790275  | -0,01915253 |  |
| 201945_at    | FURIN        | 1,683039483  | 1,702196344  | -0,01915686 |  |
| 1554348_s_at | CDKN2AIPNL   | -0,43775896  | -0,41858459  | -0,01917437 |  |
| 1557810_at   | -            | -0,43775896  | -0,41858459  | -0,01917437 |  |
| 1561770_at   | -            | -0,43775896  | -0,41858459  | -0,01917437 |  |
| 1565848_at   | ZNF428       | -0,43775896  | -0,41858459  | -0,01917437 |  |
| 203158_s_at  | GLS          | -0,43775896  | -0,41858459  | -0,01917437 |  |

|              |                   |              |              |             |  |
|--------------|-------------------|--------------|--------------|-------------|--|
| 219824_at    | SLC13A4           | -0,43775896  | -0,41858459  | -0,01917437 |  |
| 223889_at    | -                 | -0,43775896  | -0,41858459  | -0,01917437 |  |
| 228320_x_at  | CCDC64            | -0,43775896  | -0,41858459  | -0,01917437 |  |
| 228703_at    | P4HA3             | -0,43775896  | -0,41858459  | -0,01917437 |  |
| 219112_at    | FNIP1 /// RAPGE   | 3,188003814  | 3,207279726  | -0,01927591 |  |
| 1553183_at   | UMODL1            | -2,866296344 | -2,847001814 | -0,01929453 |  |
| 1554500_a_at | RGS7              | -2,866296344 | -2,847001814 | -0,01929453 |  |
| 1556599_s_at | LOC100130503      | -2,866296344 | -2,847001814 | -0,01929453 |  |
| 1557726_at   | ARMCX4            | -2,866296344 | -2,847001814 | -0,01929453 |  |
| 1557882_at   | -                 | -2,866296344 | -2,847001814 | -0,01929453 |  |
| 1558661_at   | LOC100506207      | -2,866296344 | -2,847001814 | -0,01929453 |  |
| 1558667_at   | SPATA22           | -2,866296344 | -2,847001814 | -0,01929453 |  |
| 1558827_a_at | ZNF831            | -2,866296344 | -2,847001814 | -0,01929453 |  |
| 1561383_at   | LOC284661         | -2,866296344 | -2,847001814 | -0,01929453 |  |
| 1562229_at   | -                 | -2,866296344 | -2,847001814 | -0,01929453 |  |
| 1564688_a_at | RAD9B             | -2,866296344 | -2,847001814 | -0,01929453 |  |
| 1566485_at   | -                 | -2,866296344 | -2,847001814 | -0,01929453 |  |
| 1566539_at   | -                 | -2,866296344 | -2,847001814 | -0,01929453 |  |
| 1568852_x_at | -                 | -2,866296344 | -2,847001814 | -0,01929453 |  |
| 1570473_at   | LOC338579         | -2,866296344 | -2,847001814 | -0,01929453 |  |
| 1570618_at   | -                 | -2,866296344 | -2,847001814 | -0,01929453 |  |
| 215465_at    | ABCA12            | -2,866296344 | -2,847001814 | -0,01929453 |  |
| 216288_at    | CYSLTR1           | -2,866296344 | -2,847001814 | -0,01929453 |  |
| 218730_s_at  | OGN               | -2,866296344 | -2,847001814 | -0,01929453 |  |
| 230698_at    | CALN1             | -2,866296344 | -2,847001814 | -0,01929453 |  |
| 231380_at    | C8orf34           | -2,866296344 | -2,847001814 | -0,01929453 |  |
| 232020_at    | SMURF2            | -2,866296344 | -2,847001814 | -0,01929453 |  |
| 233838_at    | -                 | -2,866296344 | -2,847001814 | -0,01929453 |  |
| 234112_at    | -                 | -2,866296344 | -2,847001814 | -0,01929453 |  |
| 234582_at    | -                 | -2,866296344 | -2,847001814 | -0,01929453 |  |
| 234794_at    | -                 | -2,866296344 | -2,847001814 | -0,01929453 |  |
| 236065_at    | -                 | -2,866296344 | -2,847001814 | -0,01929453 |  |
| 236536_at    | GALNT13           | -2,866296344 | -2,847001814 | -0,01929453 |  |
| 238160_at    | ACOT12            | -2,866296344 | -2,847001814 | -0,01929453 |  |
| 239312_at    | -                 | -2,866296344 | -2,847001814 | -0,01929453 |  |
| 240539_at    | -                 | -2,866296344 | -2,847001814 | -0,01929453 |  |
| 240879_x_at  | -                 | -2,866296344 | -2,847001814 | -0,01929453 |  |
| 241032_at    | ANKRD40           | -2,866296344 | -2,847001814 | -0,01929453 |  |
| 241412_at    | BTC               | -2,866296344 | -2,847001814 | -0,01929453 |  |
| 241502_x_at  | -                 | -2,866296344 | -2,847001814 | -0,01929453 |  |
| 225478_at    | MFHAS1            | 2,562727117  | 2,582026171  | -0,01929905 |  |
| 227814_at    | WDR53             | 1,296557217  | 1,315948728  | -0,01939151 |  |
| 225208_s_at  | FAM103A1          | 3,78170256   | 3,801102381  | -0,01939982 |  |
| 222155_s_at  | SLC52A2           | 2,618203384  | 2,637603218  | -0,01939983 |  |
| 228066_at    | C17orf96          | 1,880387527  | 1,899812471  | -0,01942494 |  |
| 226785_at    | ATP11C            | 2,294858597  | 2,314300277  | -0,01944168 |  |
| 229812_at    | USP48             | 2,429008604  | 2,448549499  | -0,01954089 |  |
| 225728_at    | SORBS2            | 0,291166226  | 0,310717132  | -0,01955091 |  |
| 227196_at    | RHPN2             | 3,823415835  | 3,843079586  | -0,01966375 |  |
| 230954_at    | C20orf112         | 2,134723057  | 2,154405725  | -0,01968267 |  |
| 222707_s_at  | ACTR8             | 2,051361651  | 2,071071048  | -0,0197094  |  |
| 206180_x_at  | ZNF747            | 1,283332461  | 1,303116084  | -0,01978362 |  |
| 217929_s_at  | KIAA0319L         | 1,283332461  | 1,303116084  | -0,01978362 |  |
| 230023_at    | NSUN4             | 1,283332461  | 1,303116084  | -0,01978362 |  |
| 236236_at    | WNK3              | 2,817903185  | 2,837730973  | -0,01982779 |  |
| 201601_x_at  | IFITM1 /// IFITM2 | 7,065715864  | 7,085586106  | -0,01987024 |  |

|              |                  |              |              |             |  |
|--------------|------------------|--------------|--------------|-------------|--|
| 209108_at    | TSPAN6           | 4,002888213  | 4,022758595  | -0,01987038 |  |
| 1552617_a_at | RFWD2            | 2,864529541  | 2,884425449  | -0,01989591 |  |
| 200597_at    | EIF3A            | 2,658027143  | 2,677924589  | -0,01989745 |  |
| 1554690_a_at | TACC1            | 0,95671774   | 0,976641161  | -0,01992342 |  |
| 225037_at    | SLC35C2          | 3,12638592   | 3,146317015  | -0,01993109 |  |
| 1552639_at   | KLHDC7B          | -1,240169874 | -1,220210588 | -0,01995929 |  |
| 1556554_at   | TRIM50           | -1,240169874 | -1,220210588 | -0,01995929 |  |
| 1559521_at   | -                | -1,240169874 | -1,220210588 | -0,01995929 |  |
| 1562239_at   | SGSM1            | -1,240169874 | -1,220210588 | -0,01995929 |  |
| 1569219_at   | -                | -1,240169874 | -1,220210588 | -0,01995929 |  |
| 202914_s_at  | ARHGEF11         | -1,240169874 | -1,220210588 | -0,01995929 |  |
| 206443_at    | RORB             | -1,240169874 | -1,220210588 | -0,01995929 |  |
| 210670_at    | PPY              | -1,240169874 | -1,220210588 | -0,01995929 |  |
| 210689_at    | CLDN14           | -1,240169874 | -1,220210588 | -0,01995929 |  |
| 215368_at    | NEB              | -1,240169874 | -1,220210588 | -0,01995929 |  |
| 224508_at    | MGC12916         | -1,240169874 | -1,220210588 | -0,01995929 |  |
| 225189_s_at  | RAPH1            | -1,240169874 | -1,220210588 | -0,01995929 |  |
| 228629_s_at  | WWTR1-AS1        | -1,240169874 | -1,220210588 | -0,01995929 |  |
| 229536_at    | REC8             | -1,240169874 | -1,220210588 | -0,01995929 |  |
| 231159_at    | CXorf51A /// CXo | -1,240169874 | -1,220210588 | -0,01995929 |  |
| 236510_at    | -                | -1,240169874 | -1,220210588 | -0,01995929 |  |
| 238927_at    | -                | -1,240169874 | -1,220210588 | -0,01995929 |  |
| 239180_at    | LOC100507419 /   | -1,240169874 | -1,220210588 | -0,01995929 |  |
| 239239_at    | BANCR            | -1,240169874 | -1,220210588 | -0,01995929 |  |
| 240300_at    | TK2              | -1,240169874 | -1,220210588 | -0,01995929 |  |
| 244711_at    | -                | -1,240169874 | -1,220210588 | -0,01995929 |  |
| 201955_at    | CCNC             | 5,372258632  | 5,392251169  | -0,01999254 |  |
| 238912_x_at  | C9orf85          | 3,202127528  | 3,222126232  | -0,0199987  |  |
| 211005_at    | LAT              | 4,040056475  | 4,060103278  | -0,0200468  |  |
| 220035_at    | NUP210           | 0,273439642  | 0,293518836  | -0,02007919 |  |
| 206240_s_at  | ZNF136           | 2,857110344  | 2,877228323  | -0,02011798 |  |
| 220201_at    | RC3H2            | 0,533835206  | 0,553993624  | -0,02015842 |  |
| 228894_at    | LOC253842 /// N  | 0,533835206  | 0,553993624  | -0,02015842 |  |
| 201603_at    | PPP1R12A         | 4,606604592  | 4,626777417  | -0,02017282 |  |
| 213853_at    | DNAJC24          | 3,117719377  | 3,137910193  | -0,02019082 |  |
| 42361_g_at   | CCHCR1           | 1,116876206  | 1,137092371  | -0,02021617 |  |
| 201658_at    | ARL1             | 3,111496958  | 3,131875186  | -0,02037823 |  |
| 50374_at     | C17orf90         | 2,070734822  | 2,091116676  | -0,02038185 |  |
| 204085_s_at  | CLN5             | 0,747935635  | 0,768343791  | -0,02040816 |  |
| 215044_s_at  | STAM2            | 0,747935635  | 0,768343791  | -0,02040816 |  |
| 225380_at    | PKDCC            | 0,747935635  | 0,768343791  | -0,02040816 |  |
| 205802_at    | TRPC1            | 1,638726528  | 1,659204017  | -0,02047749 |  |
| 216248_s_at  | NR4A2            | 1,844820248  | 1,865308541  | -0,02048829 |  |
| 228374_at    | R3HCC1L          | 2,107467633  | 2,127967638  | -0,0205     |  |
| 1554970_at   | PDILT            | -1,2845686   | -1,264005341 | -0,02056326 |  |
| 1555112_a_at | C1orf114         | -1,2845686   | -1,264005341 | -0,02056326 |  |
| 1558154_at   | -                | -1,2845686   | -1,264005341 | -0,02056326 |  |
| 1558238_at   | TNRC18           | -1,2845686   | -1,264005341 | -0,02056326 |  |
| 1560149_at   | SLC29A2          | -1,2845686   | -1,264005341 | -0,02056326 |  |
| 206325_at    | SERPINA6         | -1,2845686   | -1,264005341 | -0,02056326 |  |
| 222933_at    | MORN1            | -1,2845686   | -1,264005341 | -0,02056326 |  |
| 226071_at    | ADAMTSL4         | -1,2845686   | -1,264005341 | -0,02056326 |  |
| 227317_at    | LMCD1            | -1,2845686   | -1,264005341 | -0,02056326 |  |
| 228296_at    | YPEL1            | -1,2845686   | -1,264005341 | -0,02056326 |  |
| 233774_at    | -                | -1,2845686   | -1,264005341 | -0,02056326 |  |
| 234119_at    | -                | -1,2845686   | -1,264005341 | -0,02056326 |  |

|              |                |              |              |             |  |
|--------------|----------------|--------------|--------------|-------------|--|
| 235669_at    | AGXT2L2        | -1,2845686   | -1,264005341 | -0,02056326 |  |
| 236153_at    | -              | -1,2845686   | -1,264005341 | -0,02056326 |  |
| 236470_at    | -              | -1,2845686   | -1,264005341 | -0,02056326 |  |
| 239858_at    | -              | -1,2845686   | -1,264005341 | -0,02056326 |  |
| 242925_at    | RNF148         | -1,2845686   | -1,264005341 | -0,02056326 |  |
| 244208_at    | -              | -1,2845686   | -1,264005341 | -0,02056326 |  |
| 201251_at    | PKM            | 3,361633475  | 3,382199319  | -0,02056584 |  |
| 215737_x_at  | USF2           | 2,889473182  | 2,910041809  | -0,02056863 |  |
| 212061_at    | U2SURP         | 2,635653293  | 2,656223838  | -0,02057055 |  |
| 1552878_at   | ATOH7          | -2,756478458 | -2,735862426 | -0,02061603 |  |
| 1553024_at   | DAOA-AS1       | -2,756478458 | -2,735862426 | -0,02061603 |  |
| 1554816_at   | ASTN2          | -2,756478458 | -2,735862426 | -0,02061603 |  |
| 1555079_at   | SPATA6L        | -2,756478458 | -2,735862426 | -0,02061603 |  |
| 1564627_at   | DNAJC13        | -2,756478458 | -2,735862426 | -0,02061603 |  |
| 1564628_at   | -              | -2,756478458 | -2,735862426 | -0,02061603 |  |
| 1570470_at   | CATSPERB       | -2,756478458 | -2,735862426 | -0,02061603 |  |
| 201789_at    | DHRS7          | -2,756478458 | -2,735862426 | -0,02061603 |  |
| 207471_at    | -              | -2,756478458 | -2,735862426 | -0,02061603 |  |
| 208170_s_at  | TRIM31         | -2,756478458 | -2,735862426 | -0,02061603 |  |
| 208586_s_at  | SSX4 /// SSX4B | -2,756478458 | -2,735862426 | -0,02061603 |  |
| 215494_at    | -              | -2,756478458 | -2,735862426 | -0,02061603 |  |
| 215901_at    | ZNF81          | -2,756478458 | -2,735862426 | -0,02061603 |  |
| 216104_at    | LOC100505960   | -2,756478458 | -2,735862426 | -0,02061603 |  |
| 216444_at    | -              | -2,756478458 | -2,735862426 | -0,02061603 |  |
| 217371_s_at  | IL15           | -2,756478458 | -2,735862426 | -0,02061603 |  |
| 219909_at    | MMP28          | -2,756478458 | -2,735862426 | -0,02061603 |  |
| 227174_at    | WDR72          | -2,756478458 | -2,735862426 | -0,02061603 |  |
| 228547_at    | NRXN1          | -2,756478458 | -2,735862426 | -0,02061603 |  |
| 229778_at    | C12orf39       | -2,756478458 | -2,735862426 | -0,02061603 |  |
| 234780_at    | -              | -2,756478458 | -2,735862426 | -0,02061603 |  |
| 235494_at    | LSAMP          | -2,756478458 | -2,735862426 | -0,02061603 |  |
| 236349_at    | -              | -2,756478458 | -2,735862426 | -0,02061603 |  |
| 237741_at    | SLC25A36       | -2,756478458 | -2,735862426 | -0,02061603 |  |
| 237814_at    | -              | -2,756478458 | -2,735862426 | -0,02061603 |  |
| 237963_x_at  | -              | -2,756478458 | -2,735862426 | -0,02061603 |  |
| 240218_at    | DSCAM          | -2,756478458 | -2,735862426 | -0,02061603 |  |
| 242173_at    | -              | -2,756478458 | -2,735862426 | -0,02061603 |  |
| 243241_at    | -              | -2,756478458 | -2,735862426 | -0,02061603 |  |
| 243419_at    | -              | -2,756478458 | -2,735862426 | -0,02061603 |  |
| 244316_at    | C17orf98       | -2,756478458 | -2,735862426 | -0,02061603 |  |
| 214437_s_at  | SHMT2          | 3,423218668  | 3,443906002  | -0,02068733 |  |
| 227516_at    | SF3A1          | 1,515954005  | 1,536652708  | -0,0206987  |  |
| 225747_at    | COQ10A         | 1,390002893  | 1,410714371  | -0,02071148 |  |
| 229864_at    | C3orf75        | 1,390002893  | 1,410714371  | -0,02071148 |  |
| 221653_x_at  | APOL2          | 1,251994932  | 1,272721751  | -0,02072682 |  |
| 207318_s_at  | CDK13          | 2,320980353  | 2,341749893  | -0,02076954 |  |
| 211014_s_at  | PML            | 0,735041319  | 0,755840599  | -0,02079928 |  |
| 219917_at    | ZCCHC4         | 0,735041319  | 0,755840599  | -0,02079928 |  |
| 212221_x_at  | IDS            | 2,094906514  | 2,115788273  | -0,02088176 |  |
| 213517_at    | PCBP2          | 0,246434561  | 0,26733076   | -0,0208962  |  |
| 204472_at    | GEM            | 1,094335495  | 1,115234684  | -0,02089919 |  |
| 226750_at    | LARP1B         | 2,243430036  | 2,264418116  | -0,02098808 |  |
| 206688_s_at  | CPSF4          | 3,34687727   | 3,367892567  | -0,0210153  |  |
| 1557915_s_at | GSTO1          | 6,961331573  | 6,982375655  | -0,02104408 |  |
| 204335_at    | CCDC94         | 1,504602299  | 1,525647381  | -0,02104508 |  |
| 222752_s_at  | TMEM206        | 3,088871381  | 3,109937707  | -0,02106633 |  |

|              |              |              |              |             |  |
|--------------|--------------|--------------|--------------|-------------|--|
| 1552733_at   | KLHDC1       | -2,712026959 | -2,690860744 | -0,02116622 |  |
| 1553197_at   | DCAF4L2      | -2,712026959 | -2,690860744 | -0,02116622 |  |
| 1553912_at   | FLJ35424     | -2,712026959 | -2,690860744 | -0,02116622 |  |
| 1557177_at   | LOC100506258 | -2,712026959 | -2,690860744 | -0,02116622 |  |
| 1557699_x_at | -            | -2,712026959 | -2,690860744 | -0,02116622 |  |
| 1558075_at   | LOC399491    | -2,712026959 | -2,690860744 | -0,02116622 |  |
| 1559807_at   | -            | -2,712026959 | -2,690860744 | -0,02116622 |  |
| 1560834_a_at | RMST         | -2,712026959 | -2,690860744 | -0,02116622 |  |
| 1560973_a_at | -            | -2,712026959 | -2,690860744 | -0,02116622 |  |
| 1561297_at   | WARS2        | -2,712026959 | -2,690860744 | -0,02116622 |  |
| 1562071_at   | -            | -2,712026959 | -2,690860744 | -0,02116622 |  |
| 1563487_at   | -            | -2,712026959 | -2,690860744 | -0,02116622 |  |
| 1566867_at   | -            | -2,712026959 | -2,690860744 | -0,02116622 |  |
| 1568840_at   | DCAF13       | -2,712026959 | -2,690860744 | -0,02116622 |  |
| 210853_at    | SCN11A       | -2,712026959 | -2,690860744 | -0,02116622 |  |
| 221086_s_at  | FEZF2        | -2,712026959 | -2,690860744 | -0,02116622 |  |
| 221802_s_at  | KIAA1598     | -2,712026959 | -2,690860744 | -0,02116622 |  |
| 227265_at    | FGL2         | -2,712026959 | -2,690860744 | -0,02116622 |  |
| 231361_at    | NLGN1        | -2,712026959 | -2,690860744 | -0,02116622 |  |
| 231578_at    | GBP1         | -2,712026959 | -2,690860744 | -0,02116622 |  |
| 232277_at    | SLC28A3      | -2,712026959 | -2,690860744 | -0,02116622 |  |
| 233722_at    | -            | -2,712026959 | -2,690860744 | -0,02116622 |  |
| 233879_at    | -            | -2,712026959 | -2,690860744 | -0,02116622 |  |
| 234418_x_at  | CD44         | -2,712026959 | -2,690860744 | -0,02116622 |  |
| 234467_at    | -            | -2,712026959 | -2,690860744 | -0,02116622 |  |
| 235462_at    | CPEB2        | -2,712026959 | -2,690860744 | -0,02116622 |  |
| 237516_at    | -            | -2,712026959 | -2,690860744 | -0,02116622 |  |
| 238220_at    | KDM6A        | -2,712026959 | -2,690860744 | -0,02116622 |  |
| 239587_at    | -            | -2,712026959 | -2,690860744 | -0,02116622 |  |
| 240211_at    | LOC100130468 | -2,712026959 | -2,690860744 | -0,02116622 |  |
| 241122_s_at  | MUSK         | -2,712026959 | -2,690860744 | -0,02116622 |  |
| 242410_s_at  | CACNA1E      | -2,712026959 | -2,690860744 | -0,02116622 |  |
| 244645_at    | -            | -2,712026959 | -2,690860744 | -0,02116622 |  |
| 1555446_s_at | TRAPPC10     | 2,86748657   | 2,888726553  | -0,02123998 |  |
| 39402_at     | IL1B         | 0,083058036  | 0,104298896  | -0,02124086 |  |
| 212053_at    | PDXDC1       | 2,819431021  | 2,840694075  | -0,02126305 |  |
| 209565_at    | RNF113A      | 2,371846398  | 2,39311332   | -0,02126692 |  |
| 233369_at    | -            | 0,496120222  | 0,51742585   | -0,02130563 |  |
| 238681_at    | GDPD1        | 0,496120222  | 0,51742585   | -0,02130563 |  |
| 221676_s_at  | CORO1C       | 6,120291318  | 6,141606798  | -0,02131548 |  |
| 1561530_at   | -            | -0,512251684 | -0,490927335 | -0,02132435 |  |
| 202504_at    | TRIM29       | -0,512251684 | -0,490927335 | -0,02132435 |  |
| 203425_s_at  | IGFBP5       | -0,512251684 | -0,490927335 | -0,02132435 |  |
| 204922_at    | C11orf80     | -0,512251684 | -0,490927335 | -0,02132435 |  |
| 206650_at    | IQCC         | -0,512251684 | -0,490927335 | -0,02132435 |  |
| 206735_at    | CHRNA4       | -0,512251684 | -0,490927335 | -0,02132435 |  |
| 213622_at    | COL9A2       | -0,512251684 | -0,490927335 | -0,02132435 |  |
| 214541_s_at  | QKI          | -0,512251684 | -0,490927335 | -0,02132435 |  |
| 232374_s_at  | -            | -0,512251684 | -0,490927335 | -0,02132435 |  |
| 241490_s_at  | PGBD2        | -0,512251684 | -0,490927335 | -0,02132435 |  |
| 1553955_at   | PPP1R21      | 1,369290453  | 1,390636111  | -0,02134566 |  |
| 220051_at    | PRSS21       | 4,099113343  | 4,12047658   | -0,02136324 |  |
| 238760_at    | YARS         | 0,715481152  | 0,73688026   | -0,02139911 |  |
| 204809_at    | CLPX         | 3,42923503   | 3,450709925  | -0,02147489 |  |
| 224960_at    | SCYL2        | 3,787958926  | 3,809444866  | -0,02148594 |  |
| 215179_x_at  | PGF          | 2,947914474  | 2,969455976  | -0,0215415  |  |

|              |                 |              |              |             |  |
|--------------|-----------------|--------------|--------------|-------------|--|
| 1555881_s_at | LZTS2           | 2,427005622  | 2,448549499  | -0,02154388 |  |
| 202959_at    | MUT             | 1,603688695  | 1,6252386    | -0,02154991 |  |
| 1554763_at   | UBE2DNL         | -1,353583928 | -1,332017329 | -0,0215666  |  |
| 1564400_at   | C18orf62        | -1,353583928 | -1,332017329 | -0,0215666  |  |
| 207334_s_at  | TGFBR2          | -1,353583928 | -1,332017329 | -0,0215666  |  |
| 214890_s_at  | FAM149A         | -1,353583928 | -1,332017329 | -0,0215666  |  |
| 225908_at    | IAH1            | -1,353583928 | -1,332017329 | -0,0215666  |  |
| 231404_at    | SPTY2D1-AS1     | -1,353583928 | -1,332017329 | -0,0215666  |  |
| 232887_at    | PIRT            | -1,353583928 | -1,332017329 | -0,0215666  |  |
| 235787_at    | CDC37L1         | -1,353583928 | -1,332017329 | -0,0215666  |  |
| 236059_at    | LOC100130428    | -1,353583928 | -1,332017329 | -0,0215666  |  |
| 237535_x_at  | NRXN1           | -1,353583928 | -1,332017329 | -0,0215666  |  |
| 238373_at    | H1FNT           | -1,353583928 | -1,332017329 | -0,0215666  |  |
| 240470_at    | -               | -1,353583928 | -1,332017329 | -0,0215666  |  |
| 242850_at    | -               | -1,353583928 | -1,332017329 | -0,0215666  |  |
| 244857_at    | HBEGF           | -1,353583928 | -1,332017329 | -0,0215666  |  |
| 201883_s_at  | B4GALT1         | 2,710020346  | 2,731588328  | -0,02156798 |  |
| 228495_at    | CCDC75          | 2,710020346  | 2,731588328  | -0,02156798 |  |
| 203554_x_at  | PTTG1           | 5,47954976   | 5,501134613  | -0,02158485 |  |
| 211200_s_at  | EFCAB2          | 0,900083947  | 0,921731975  | -0,02164803 |  |
| 201012_at    | ANXA1           | 7,047130775  | 7,06878371   | -0,02165293 |  |
| 218891_at    | C10orf76        | 2,069451339  | 2,091116676  | -0,02166534 |  |
| 212175_s_at  | AK2             | 4,626378238  | 4,648076762  | -0,02169852 |  |
| 242695_at    | -               | 1,805273023  | 1,826973888  | -0,02170086 |  |
| 213610_s_at  | KLHL23 /// PHOS | 2,705069849  | 2,726791458  | -0,02172161 |  |
| 234897_s_at  | LY6G6D /// LY6G | 2,355089531  | 2,376875125  | -0,02178559 |  |
| 211765_x_at  | PPIA            | 7,80826997   | 7,830064196  | -0,02179423 |  |
| 229061_s_at  | SLC25A13        | 2,938102794  | 2,959949103  | -0,02184631 |  |
| 222190_s_at  | C16orf58        | 1,215326747  | 1,23718272   | -0,02185597 |  |
| 1552703_s_at | CARD16 /// CASP | -2,64318869  | -2,621331989 | -0,0218567  |  |
| 1553787_at   | C11orf45        | -2,64318869  | -2,621331989 | -0,0218567  |  |
| 1553888_at   | LDHAL6A         | -2,64318869  | -2,621331989 | -0,0218567  |  |
| 1556476_at   | LOC283485       | -2,64318869  | -2,621331989 | -0,0218567  |  |
| 1557443_s_at | LOC100505811    | -2,64318869  | -2,621331989 | -0,0218567  |  |
| 1557736_at   | NKTR            | -2,64318869  | -2,621331989 | -0,0218567  |  |
| 1558449_at   | -               | -2,64318869  | -2,621331989 | -0,0218567  |  |
| 1560490_at   | FAT3            | -2,64318869  | -2,621331989 | -0,0218567  |  |
| 1561084_at   | -               | -2,64318869  | -2,621331989 | -0,0218567  |  |
| 1561482_at   | LOC100133308    | -2,64318869  | -2,621331989 | -0,0218567  |  |
| 1561592_at   | -               | -2,64318869  | -2,621331989 | -0,0218567  |  |
| 1564882_at   | -               | -2,64318869  | -2,621331989 | -0,0218567  |  |
| 1569023_a_at | LINC00458       | -2,64318869  | -2,621331989 | -0,0218567  |  |
| 1569677_a_at | MCMDC2          | -2,64318869  | -2,621331989 | -0,0218567  |  |
| 206326_at    | GRP             | -2,64318869  | -2,621331989 | -0,0218567  |  |
| 206676_at    | CEACAM8         | -2,64318869  | -2,621331989 | -0,0218567  |  |
| 212230_at    | PPAP2B          | -2,64318869  | -2,621331989 | -0,0218567  |  |
| 214807_at    | -               | -2,64318869  | -2,621331989 | -0,0218567  |  |
| 216573_at    | IGLV1-44        | -2,64318869  | -2,621331989 | -0,0218567  |  |
| 216653_at    | DR1             | -2,64318869  | -2,621331989 | -0,0218567  |  |
| 219973_at    | ARSJ            | -2,64318869  | -2,621331989 | -0,0218567  |  |
| 220809_at    | -               | -2,64318869  | -2,621331989 | -0,0218567  |  |
| 222168_at    | -               | -2,64318869  | -2,621331989 | -0,0218567  |  |
| 224214_at    | -               | -2,64318869  | -2,621331989 | -0,0218567  |  |
| 232250_at    | KIAA1257        | -2,64318869  | -2,621331989 | -0,0218567  |  |
| 232862_at    | ABHD5           | -2,64318869  | -2,621331989 | -0,0218567  |  |
| 234078_at    | ADAMTS9-AS2     | -2,64318869  | -2,621331989 | -0,0218567  |  |



|              |                  |              |              |             |  |
|--------------|------------------|--------------|--------------|-------------|--|
| 234407_s_at  | TRPC7            | -2,64318869  | -2,621331989 | -0,0218567  |  |
| 240476_at    | -                | -2,64318869  | -2,621331989 | -0,0218567  |  |
| 241072_s_at  | -                | -2,64318869  | -2,621331989 | -0,0218567  |  |
| 241170_at    | -                | -2,64318869  | -2,621331989 | -0,0218567  |  |
| 241851_x_at  | LOC100130429     | -2,64318869  | -2,621331989 | -0,0218567  |  |
| 243906_at    | -                | -2,64318869  | -2,621331989 | -0,0218567  |  |
| 223218_s_at  | NFKBIZ           | 3,846079118  | 3,86798237   | -0,02190325 |  |
| 209022_at    | STAG2            | 4,686218227  | 4,70812399   | -0,02190576 |  |
| 224887_at    | GNPTG            | 2,061726373  | 2,083632167  | -0,02190579 |  |
| 213500_at    | -                | 1,348276312  | 1,370274469  | -0,02199816 |  |
| 226862_at    | MBD1             | 1,348276312  | 1,370274469  | -0,02199816 |  |
| 204019_s_at  | SH3YL1           | 2,531373922  | 2,553413592  | -0,02203967 |  |
| 219588_s_at  | NCAPG2           | 3,207971844  | 3,23005767   | -0,02208583 |  |
| 1556649_at   | -                | -1,399512875 | -1,377419394 | -0,02209348 |  |
| 1556839_s_at | LOC100289090     | -1,399512875 | -1,377419394 | -0,02209348 |  |
| 1566879_at   | -                | -1,399512875 | -1,377419394 | -0,02209348 |  |
| 1570644_at   | -                | -1,399512875 | -1,377419394 | -0,02209348 |  |
| 206899_at    | NTSR2            | -1,399512875 | -1,377419394 | -0,02209348 |  |
| 208092_s_at  | FAM49A           | -1,399512875 | -1,377419394 | -0,02209348 |  |
| 214098_at    | KIAA1107         | -1,399512875 | -1,377419394 | -0,02209348 |  |
| 214503_x_at  | GPR135           | -1,399512875 | -1,377419394 | -0,02209348 |  |
| 215573_at    | CAT              | -1,399512875 | -1,377419394 | -0,02209348 |  |
| 217462_at    | C11orf9          | -1,399512875 | -1,377419394 | -0,02209348 |  |
| 221909_at    | RNFT2            | -1,399512875 | -1,377419394 | -0,02209348 |  |
| 227996_at    | FARP1            | -1,399512875 | -1,377419394 | -0,02209348 |  |
| 231148_at    | IGFL2            | -1,399512875 | -1,377419394 | -0,02209348 |  |
| 236088_at    | NTNG1            | -1,399512875 | -1,377419394 | -0,02209348 |  |
| 236858_s_at  | RUNX2            | -1,399512875 | -1,377419394 | -0,02209348 |  |
| 242259_at    | FAM187B          | -1,399512875 | -1,377419394 | -0,02209348 |  |
| 243458_at    | -                | -1,399512875 | -1,377419394 | -0,02209348 |  |
| 214812_s_at  | MOB1A            | 3,838564178  | 3,860702537  | -0,02213836 |  |
| 217794_at    | PRR13            | 4,906708939  | 4,928848136  | -0,0221392  |  |
| 211150_s_at  | DLAT             | 3,013454777  | 3,035599287  | -0,02214451 |  |
| 225850_at    | SFT2D1           | 5,468393796  | 5,49056154   | -0,02216774 |  |
| 217940_s_at  | CARKD            | 3,497632487  | 3,519816196  | -0,02218371 |  |
| 214022_s_at  | IFITM1           | 6,98219915   | 7,004385098  | -0,02218595 |  |
| 1558251_a_at | ZNF587 /// ZNF5  | 0,882651021  | 0,904843258  | -0,02219224 |  |
| 1560562_a_at | ZNF677           | 0,882651021  | 0,904843258  | -0,02219224 |  |
| 224853_at    | SLAIN2           | 0,882651021  | 0,904843258  | -0,02219224 |  |
| 230052_s_at  | NFKBID           | 0,882651021  | 0,904843258  | -0,02219224 |  |
| 91617_at     | DGCR8 /// MIR13  | 1,203674144  | 1,225894807  | -0,02222066 |  |
| 202984_s_at  | BAG5             | 3,858765357  | 3,880994209  | -0,02222885 |  |
| 1561871_at   | -                | 1,46610492   | 1,488344553  | -0,02223963 |  |
| 217957_at    | C16orf80         | 4,774720665  | 4,796999275  | -0,02227861 |  |
| 211009_s_at  | ZNF271           | 3,127619759  | 3,149904996  | -0,02228524 |  |
| 204419_x_at  | HBG1 /// HBG2 // | 8,133658582  | 8,155977251  | -0,02231867 |  |
| 1555289_at   | SEC16B           | 0,20027154   | 0,222599095  | -0,02232756 |  |
| 203215_s_at  | MYO6             | 0,20027154   | 0,222599095  | -0,02232756 |  |
| 206582_s_at  | GPR56            | 0,20027154   | 0,222599095  | -0,02232756 |  |
| 211521_s_at  | CYTH4            | 0,20027154   | 0,222599095  | -0,02232756 |  |
| 219808_at    | SCLY             | 0,20027154   | 0,222599095  | -0,02232756 |  |
| 221013_s_at  | APOL2            | 0,20027154   | 0,222599095  | -0,02232756 |  |
| 224299_x_at  | FTCD             | 0,20027154   | 0,222599095  | -0,02232756 |  |
| 230922_x_at  | FUNDC2           | 0,20027154   | 0,222599095  | -0,02232756 |  |
| 235799_at    | NSL1             | 0,20027154   | 0,222599095  | -0,02232756 |  |
| 242687_at    | FAM160A1         | 0,20027154   | 0,222599095  | -0,02232756 |  |

|             |           |              |              |             |  |
|-------------|-----------|--------------|--------------|-------------|--|
| 208051_s_at | PAIP1     | 2,400710591  | 2,423075926  | -0,02236533 |  |
| 229126_at   | TMEM19    | 2,400710591  | 2,423075926  | -0,02236533 |  |
| 1556827_at  | LPP-AS2   | -2,597496523 | -2,575129729 | -0,02236679 |  |
| 1558611_at  | C17orf69  | -2,597496523 | -2,575129729 | -0,02236679 |  |
| 1559284_at  | -         | -2,597496523 | -2,575129729 | -0,02236679 |  |
| 1562169_at  | -         | -2,597496523 | -2,575129729 | -0,02236679 |  |
| 205889_s_at | JAKMIP2   | -2,597496523 | -2,575129729 | -0,02236679 |  |
| 209419_at   | THOC5     | -2,597496523 | -2,575129729 | -0,02236679 |  |
| 209480_at   | HLA-DQB1  | -2,597496523 | -2,575129729 | -0,02236679 |  |
| 209612_s_at | ADH1B     | -2,597496523 | -2,575129729 | -0,02236679 |  |
| 210717_at   | -         | -2,597496523 | -2,575129729 | -0,02236679 |  |
| 224209_s_at | GDA       | -2,597496523 | -2,575129729 | -0,02236679 |  |
| 230495_at   | LOC150568 | -2,597496523 | -2,575129729 | -0,02236679 |  |
| 233681_at   | KRTAP3-3  | -2,597496523 | -2,575129729 | -0,02236679 |  |
| 234274_at   | -         | -2,597496523 | -2,575129729 | -0,02236679 |  |
| 235115_at   | PDE8B     | -2,597496523 | -2,575129729 | -0,02236679 |  |
| 236823_at   | IDS       | -2,597496523 | -2,575129729 | -0,02236679 |  |
| 238455_at   | -         | -2,597496523 | -2,575129729 | -0,02236679 |  |
| 239710_at   | FIGN      | -2,597496523 | -2,575129729 | -0,02236679 |  |
| 240573_at   | LOC374443 | -2,597496523 | -2,575129729 | -0,02236679 |  |
| 241195_at   | -         | -2,597496523 | -2,575129729 | -0,02236679 |  |
| 241883_x_at | -         | -2,597496523 | -2,575129729 | -0,02236679 |  |
| 242250_at   | -         | -2,597496523 | -2,575129729 | -0,02236679 |  |
| 243068_at   | -         | -2,597496523 | -2,575129729 | -0,02236679 |  |
| 243341_at   | -         | -2,597496523 | -2,575129729 | -0,02236679 |  |
| 244195_at   | -         | -2,597496523 | -2,575129729 | -0,02236679 |  |
| 209831_x_at | DNASE2    | 1,783520648  | 1,805902329  | -0,02238168 |  |
| 221686_s_at | RECQL5    | 1,783520648  | 1,805902329  | -0,02238168 |  |
| 221756_at   | PIK3IP1   | 0,682279745  | 0,704715219  | -0,02243547 |  |
| 239236_at   | -         | 0,682279745  | 0,704715219  | -0,02243547 |  |
| 216205_s_at | MFN2      | 1,575032557  | 1,59747851   | -0,02244595 |  |
| 202745_at   | USP8      | 3,196259441  | 3,218713651  | -0,02245421 |  |
| 201783_s_at | RELA      | 2,043538949  | 2,066015817  | -0,02247687 |  |
| 216232_s_at | GCN1L1    | 2,043538949  | 2,066015817  | -0,02247687 |  |
| 228332_s_at | C11orf31  | 5,495645874  | 5,51812337   | -0,0224775  |  |
| 217845_x_at | HIGD1A    | 6,102204329  | 6,12468841   | -0,02248408 |  |
| 217888_s_at | ARFGAP1   | 2,396622324  | 2,419116683  | -0,02249436 |  |
| 218051_s_at | NT5DC2    | 2,960432227  | 2,982929462  | -0,02249724 |  |
| 205652_s_at | TTLL1     | 0,457392764  | 0,479907041  | -0,02251428 |  |
| 206281_at   | ADCYAP1   | 0,457392764  | 0,479907041  | -0,02251428 |  |
| 224730_at   | DCAF7     | 2,11992033   | 2,14244844   | -0,02252811 |  |
| 225796_at   | PXK       | 0,87091093   | 0,893473268  | -0,02256234 |  |
| 218557_at   | NIT2      | 3,000043914  | 3,022611001  | -0,02256709 |  |
| 205895_s_at | NOLC1     | 4,813186795  | 4,835756686  | -0,02256989 |  |
| 229594_at   | SPTY2D1   | 3,22766727   | 3,250254796  | -0,02258753 |  |
| 207480_s_at | MEIS2     | 3,359534664  | 3,382199319  | -0,02266465 |  |
| 223322_at   | RASSF5    | 1,567778694  | 1,590454215  | -0,02267552 |  |
| 224504_s_at | BUD13     | 1,567778694  | 1,590454215  | -0,02267552 |  |
| 224680_at   | TMED4     | 2,724770722  | 2,747463672  | -0,02269295 |  |
| 213465_s_at | PPP1R7    | 4,132069007  | 4,154809816  | -0,02274081 |  |
| 223226_x_at | SSBP4     | 2,771299138  | 2,794067719  | -0,02276858 |  |
| 204700_x_at | DIEXF     | 2,671625168  | 2,694398145  | -0,02277298 |  |
| 204826_at   | CCNF      | 2,185368281  | 2,208167653  | -0,02279937 |  |
| 229903_x_at | RNPC3     | 2,185368281  | 2,208167653  | -0,02279937 |  |
| 202115_s_at | NOC2L     | 2,506929603  | 2,529740643  | -0,02281104 |  |
| 215631_s_at | BRMS1     | 2,506929603  | 2,529740643  | -0,02281104 |  |

|              |                |              |              |             |  |
|--------------|----------------|--------------|--------------|-------------|--|
| 223892_s_at  | TMBIM4         | 4,662579234  | 4,685434648  | -0,02285541 |  |
| 208814_at    | HSPA4          | 1,446464021  | 1,469325098  | -0,02286108 |  |
| 211575_s_at  | UBE3A          | 2,768138014  | 2,791007185  | -0,02286917 |  |
| 223502_s_at  | TNFSF13B       | 2,030406107  | 2,053299695  | -0,02289359 |  |
| 218834_s_at  | TMEM132A       | 0,181384709  | 0,204310755  | -0,02292605 |  |
| 225529_at    | ACAP3          | 0,181384709  | 0,204310755  | -0,02292605 |  |
| 223156_at    | MRPS23         | 4,444279108  | 4,467209824  | -0,02293072 |  |
| 201597_at    | COX7A2         | 6,587192936  | 6,61012506   | -0,02293212 |  |
| 1555325_s_at | LOC100287515 / | 1,177702228  | 1,200746069  | -0,02304384 |  |
| 1555886_at   | PDSS2          | 1,177702228  | 1,200746069  | -0,02304384 |  |
| 227572_at    | USP30          | 1,177702228  | 1,200746069  | -0,02304384 |  |
| 229586_at    | CHD9           | 1,314003737  | 1,337086025  | -0,02308229 |  |
| 242787_at    | -              | 1,314003737  | 1,337086025  | -0,02308229 |  |
| 200885_at    | RHOC           | 4,004232272  | 4,027317343  | -0,02308507 |  |
| 211376_s_at  | NSMCE4A        | 3,854300588  | 3,877391565  | -0,02309098 |  |
| 220606_s_at  | C17orf48       | 0,853119696  | 0,876248481  | -0,02312879 |  |
| 235901_at    | -              | 0,853119696  | 0,876248481  | -0,02312879 |  |
| 217883_at    | MMADHC         | 5,666452598  | 5,689595744  | -0,02314315 |  |
| 209899_s_at  | PUF60          | 5,487500141  | 5,510700859  | -0,02320072 |  |
| 209216_at    | WDR45          | 4,571901478  | 4,595104545  | -0,02320307 |  |
| 217627_at    | ZNF573         | 4,225494449  | 4,248708657  | -0,02321421 |  |
| 221253_s_at  | MUTED-TXNDC5   | 6,054672518  | 6,07797655   | -0,02330403 |  |
| 218314_s_at  | C11orf57       | 2,654607516  | 2,677924589  | -0,02331707 |  |
| 218157_x_at  | CDC42SE1       | 4,168490774  | 4,191830037  | -0,02333926 |  |
| 200824_at    | GSTP1          | 4,888992624  | 4,912395116  | -0,02340249 |  |
| 1552526_at   | FAM71C         | -1,518072576 | -1,494668682 | -0,02340389 |  |
| 1553004_at   | PKD1L1         | -1,518072576 | -1,494668682 | -0,02340389 |  |
| 1559021_at   | C3orf52        | -1,518072576 | -1,494668682 | -0,02340389 |  |
| 1563007_at   | -              | -1,518072576 | -1,494668682 | -0,02340389 |  |
| 1563316_at   | NEGR1-IT1      | -1,518072576 | -1,494668682 | -0,02340389 |  |
| 1570542_a_at | PMPCB          | -1,518072576 | -1,494668682 | -0,02340389 |  |
| 207704_s_at  | GAS7           | -1,518072576 | -1,494668682 | -0,02340389 |  |
| 207893_at    | SRY            | -1,518072576 | -1,494668682 | -0,02340389 |  |
| 215198_s_at  | CALD1          | -1,518072576 | -1,494668682 | -0,02340389 |  |
| 219604_s_at  | ZNF3           | -1,518072576 | -1,494668682 | -0,02340389 |  |
| 219950_s_at  | TIAM2          | -1,518072576 | -1,494668682 | -0,02340389 |  |
| 220611_at    | DAB1           | -1,518072576 | -1,494668682 | -0,02340389 |  |
| 220974_x_at  | SFXN3          | -1,518072576 | -1,494668682 | -0,02340389 |  |
| 221608_at    | WNT6           | -1,518072576 | -1,494668682 | -0,02340389 |  |
| 232116_at    | GRHL3          | -1,518072576 | -1,494668682 | -0,02340389 |  |
| 232476_at    | -              | -1,518072576 | -1,494668682 | -0,02340389 |  |
| 237036_at    | FBXO10         | -1,518072576 | -1,494668682 | -0,02340389 |  |
| 243939_at    | -              | -1,518072576 | -1,494668682 | -0,02340389 |  |
| 244426_at    | -              | -1,518072576 | -1,494668682 | -0,02340389 |  |
| 215568_x_at  | LYPLA2         | 2,544366685  | 2,567790814  | -0,02342413 |  |
| 1554018_at   | GNPMB          | -2,479842156 | -2,456406426 | -0,02343573 |  |
| 1555643_s_at | LILRA5         | -2,479842156 | -2,456406426 | -0,02343573 |  |
| 1556730_at   | LOC652993      | -2,479842156 | -2,456406426 | -0,02343573 |  |
| 1557791_at   | -              | -2,479842156 | -2,456406426 | -0,02343573 |  |
| 1559837_at   | -              | -2,479842156 | -2,456406426 | -0,02343573 |  |
| 1560889_a_at | -              | -2,479842156 | -2,456406426 | -0,02343573 |  |
| 1562439_at   | NCOA3          | -2,479842156 | -2,456406426 | -0,02343573 |  |
| 211399_at    | FGFR2          | -2,479842156 | -2,456406426 | -0,02343573 |  |
| 212298_at    | NRP1           | -2,479842156 | -2,456406426 | -0,02343573 |  |
| 213541_s_at  | ERG            | -2,479842156 | -2,456406426 | -0,02343573 |  |
| 221461_at    | TAS2R9         | -2,479842156 | -2,456406426 | -0,02343573 |  |

|              |                 |              |              |             |  |
|--------------|-----------------|--------------|--------------|-------------|--|
| 233609_at    | PTPRK           | -2,479842156 | -2,456406426 | -0,02343573 |  |
| 233639_at    | POMGNT1         | -2,479842156 | -2,456406426 | -0,02343573 |  |
| 237982_at    | -               | -2,479842156 | -2,456406426 | -0,02343573 |  |
| 239568_at    | PLEKHH2         | -2,479842156 | -2,456406426 | -0,02343573 |  |
| 241162_at    | -               | -2,479842156 | -2,456406426 | -0,02343573 |  |
| 241548_at    | -               | -2,479842156 | -2,456406426 | -0,02343573 |  |
| 244708_at    | SCN8A           | -2,479842156 | -2,456406426 | -0,02343573 |  |
| 208637_x_at  | ACTN1           | 4,457095376  | 4,480569206  | -0,02347383 |  |
| 225374_at    | MIR4723 /// TME | 2,365585359  | 2,389070873  | -0,02348551 |  |
| 231714_s_at  | AP4B1           | 2,365585359  | 2,389070873  | -0,02348551 |  |
| 204284_at    | PPP1R3C         | 2,333865983  | 2,357351836  | -0,02348585 |  |
| 215006_at    | -               | 1,841816345  | 1,865308541  | -0,0234922  |  |
| 226477_at    | VPRBP           | 1,841816345  | 1,865308541  | -0,0234922  |  |
| 210374_x_at  | PTGER3          | 1,426552034  | 1,450051551  | -0,02349952 |  |
| 209217_s_at  | WDR45           | 3,333038605  | 3,356551164  | -0,02351256 |  |
| 1560198_at   | LINC00523       | 0,841135803  | 0,864649967  | -0,02351416 |  |
| 203754_s_at  | BRF1            | 0,841135803  | 0,864649967  | -0,02351416 |  |
| 203505_at    | ABCA1           | 0,648296226  | 0,67181667   | -0,02352044 |  |
| 224956_at    | NUFIP2          | 3,086335384  | 3,109937707  | -0,02360232 |  |
| 218787_x_at  | CWF19L1         | 2,967339888  | 2,990953566  | -0,02361368 |  |
| 225748_at    | LTV1            | 4,437828024  | 4,461446286  | -0,02361826 |  |
| 211025_x_at  | COX5B           | 5,502319762  | 5,525968169  | -0,02364841 |  |
| 201909_at    | RPS4Y1          | -0,59053611  | -0,566887459 | -0,02364865 |  |
| 205507_at    | ARHGEF15        | -0,59053611  | -0,566887459 | -0,02364865 |  |
| 232387_at    | SYNRG           | -0,59053611  | -0,566887459 | -0,02364865 |  |
| 243213_at    | STAT3           | -0,59053611  | -0,566887459 | -0,02364865 |  |
| 243718_at    | -               | -0,59053611  | -0,566887459 | -0,02364865 |  |
| 60471_at     | RIN3            | 1,643909574  | 1,66757188   | -0,02366231 |  |
| 200913_at    | PPM1G           | 3,858765357  | 3,882432751  | -0,02366739 |  |
| 228084_at    | PLA2G12A        | 1,742232072  | 1,765933685  | -0,02370161 |  |
| 201697_s_at  | DNMT1           | 6,82089946   | 6,844610277  | -0,02371082 |  |
| 211941_s_at  | PEBP1           | 4,764842601  | 4,7885843    | -0,0237417  |  |
| 235647_at    | AP4S1           | 2,640847372  | 2,664608955  | -0,02376158 |  |
| 213607_x_at  | NADK            | 2,225103271  | 2,248887791  | -0,02378452 |  |
| 202020_s_at  | LANCL1          | 4,153426622  | 4,177252958  | -0,02382634 |  |
| 227141_at    | TYW3            | 3,785615967  | 3,809444866  | -0,0238289  |  |
| 211750_x_at  | TUBA1C          | 7,484053056  | 7,507888831  | -0,02383578 |  |
| 224903_at    | CIRH1A          | 5,059654156  | 5,083502044  | -0,02384789 |  |
| 1557119_a_at | ZNF575          | 0,152582607  | 0,176436073  | -0,02385347 |  |
| 202709_at    | FMOD            | 0,152582607  | 0,176436073  | -0,02385347 |  |
| 234513_at    | ELOVL3          | 0,152582607  | 0,176436073  | -0,02385347 |  |
| 239630_at    | -               | 0,152582607  | 0,176436073  | -0,02385347 |  |
| 1552457_a_at | ADAMTSL1        | -2,43257096  | -2,408705138 | -0,02386582 |  |
| 1552754_a_at | CADM2           | -2,43257096  | -2,408705138 | -0,02386582 |  |
| 1553901_x_at | ZNF486          | -2,43257096  | -2,408705138 | -0,02386582 |  |
| 1556267_at   | C12orf28        | -2,43257096  | -2,408705138 | -0,02386582 |  |
| 1556940_at   | LOC283484       | -2,43257096  | -2,408705138 | -0,02386582 |  |
| 1558186_s_at | CLLU1 /// LOC10 | -2,43257096  | -2,408705138 | -0,02386582 |  |
| 1565890_at   | -               | -2,43257096  | -2,408705138 | -0,02386582 |  |
| 1566030_at   | -               | -2,43257096  | -2,408705138 | -0,02386582 |  |
| 1569315_s_at | LOC100272228    | -2,43257096  | -2,408705138 | -0,02386582 |  |
| 202286_s_at  | TACSTD2         | -2,43257096  | -2,408705138 | -0,02386582 |  |
| 203001_s_at  | STMN2           | -2,43257096  | -2,408705138 | -0,02386582 |  |
| 204456_s_at  | GAS1            | -2,43257096  | -2,408705138 | -0,02386582 |  |
| 204834_at    | FGL2            | -2,43257096  | -2,408705138 | -0,02386582 |  |
| 206314_at    | ZNF167          | -2,43257096  | -2,408705138 | -0,02386582 |  |

|              |                  |              |              |             |  |
|--------------|------------------|--------------|--------------|-------------|--|
| 206761_at    | CD96             | -2,43257096  | -2,408705138 | -0,02386582 |  |
| 207095_at    | SLC10A2          | -2,43257096  | -2,408705138 | -0,02386582 |  |
| 208139_s_at  | -                | -2,43257096  | -2,408705138 | -0,02386582 |  |
| 217252_at    | -                | -2,43257096  | -2,408705138 | -0,02386582 |  |
| 219250_s_at  | FLRT3            | -2,43257096  | -2,408705138 | -0,02386582 |  |
| 227354_at    | PAG1             | -2,43257096  | -2,408705138 | -0,02386582 |  |
| 230303_at    | SYNPR            | -2,43257096  | -2,408705138 | -0,02386582 |  |
| 230917_at    | -                | -2,43257096  | -2,408705138 | -0,02386582 |  |
| 231536_at    | -                | -2,43257096  | -2,408705138 | -0,02386582 |  |
| 231603_at    | RNASE11          | -2,43257096  | -2,408705138 | -0,02386582 |  |
| 232692_at    | TDRD6            | -2,43257096  | -2,408705138 | -0,02386582 |  |
| 233778_at    | -                | -2,43257096  | -2,408705138 | -0,02386582 |  |
| 233869_x_at  | -                | -2,43257096  | -2,408705138 | -0,02386582 |  |
| 236782_at    | SAMD3            | -2,43257096  | -2,408705138 | -0,02386582 |  |
| 237689_at    | -                | -2,43257096  | -2,408705138 | -0,02386582 |  |
| 237776_at    | LOC100652904     | -2,43257096  | -2,408705138 | -0,02386582 |  |
| 237981_at    | CMYA5            | -2,43257096  | -2,408705138 | -0,02386582 |  |
| 241284_at    | -                | -2,43257096  | -2,408705138 | -0,02386582 |  |
| 244244_at    | -                | -2,43257096  | -2,408705138 | -0,02386582 |  |
| 244335_at    | -                | -2,43257096  | -2,408705138 | -0,02386582 |  |
| 1555679_a_at | RTN4IP1          | 2,352981171  | 2,376875125  | -0,02389395 |  |
| 211016_x_at  | HSPA4            | 3,998848507  | 4,022758595  | -0,02391009 |  |
| 223808_s_at  | NDUFS3 /// PTPN  | 3,527851575  | 3,551810897  | -0,02395932 |  |
| 202543_s_at  | GMFB             | 3,285189903  | 3,309203139  | -0,02401324 |  |
| 214290_s_at  | HIST2H2AA3 /// H | 7,180696154  | 7,204722872  | -0,02402672 |  |
| 231629_x_at  | KLK3             | 1,912238072  | 1,936283387  | -0,02404532 |  |
| 39249_at     | AQP3             | 2,577249059  | 2,601373229  | -0,02412417 |  |
| 212669_at    | CAMK2G           | 1,143956113  | 1,16809119   | -0,02413508 |  |
| 218659_at    | ASXL2            | 3,069741844  | 3,09388391   | -0,02414207 |  |
| 207508_at    | ATP5G3           | 6,212715165  | 6,236903587  | -0,02418842 |  |
| 218932_at    | ZNHIT6           | 3,545499171  | 3,569779975  | -0,0242808  |  |
| 1556787_s_at | PDE5A            | -2,359436556 | -2,335104118 | -0,02433244 |  |
| 1557498_a_at | -                | -2,359436556 | -2,335104118 | -0,02433244 |  |
| 1561870_at   | -                | -2,359436556 | -2,335104118 | -0,02433244 |  |
| 1562065_at   | -                | -2,359436556 | -2,335104118 | -0,02433244 |  |
| 1562786_at   | -                | -2,359436556 | -2,335104118 | -0,02433244 |  |
| 1563480_at   | -                | -2,359436556 | -2,335104118 | -0,02433244 |  |
| 1564327_at   | FLJ32790         | -2,359436556 | -2,335104118 | -0,02433244 |  |
| 1566836_at   | -                | -2,359436556 | -2,335104118 | -0,02433244 |  |
| 1568802_at   | NADSYN1          | -2,359436556 | -2,335104118 | -0,02433244 |  |
| 202612_s_at  | MED14            | -2,359436556 | -2,335104118 | -0,02433244 |  |
| 206957_at    | AGXT             | -2,359436556 | -2,335104118 | -0,02433244 |  |
| 207195_at    | CNTN6            | -2,359436556 | -2,335104118 | -0,02433244 |  |
| 209474_s_at  | ENTPD1           | -2,359436556 | -2,335104118 | -0,02433244 |  |
| 216099_at    | HTR7P1           | -2,359436556 | -2,335104118 | -0,02433244 |  |
| 216765_at    | MAP2K5           | -2,359436556 | -2,335104118 | -0,02433244 |  |
| 216921_s_at  | KRT35            | -2,359436556 | -2,335104118 | -0,02433244 |  |
| 220537_at    | ASB12 /// MTMR3  | -2,359436556 | -2,335104118 | -0,02433244 |  |
| 221252_s_at  | GSG1             | -2,359436556 | -2,335104118 | -0,02433244 |  |
| 228169_s_at  | -                | -2,359436556 | -2,335104118 | -0,02433244 |  |
| 234183_at    | -                | -2,359436556 | -2,335104118 | -0,02433244 |  |
| 237531_at    | -                | -2,359436556 | -2,335104118 | -0,02433244 |  |
| 238189_at    | SIN3A            | -2,359436556 | -2,335104118 | -0,02433244 |  |
| 240011_at    | TTBK2            | -2,359436556 | -2,335104118 | -0,02433244 |  |
| 241316_at    | -                | -2,359436556 | -2,335104118 | -0,02433244 |  |
| 241669_x_at  | PRKD2            | -2,359436556 | -2,335104118 | -0,02433244 |  |

|              |                 |              |              |             |  |
|--------------|-----------------|--------------|--------------|-------------|--|
| 241885_at    | -               | -2,359436556 | -2,335104118 | -0,02433244 |  |
| 244812_at    | -               | -2,359436556 | -2,335104118 | -0,02433244 |  |
| 226397_s_at  | -               | 2,338135744  | 2,362515214  | -0,02437947 |  |
| 205633_s_at  | ALAS1           | 3,621908408  | 3,646288546  | -0,02438014 |  |
| 226760_at    | MBTPS2          | 4,117238882  | 4,141655035  | -0,02441615 |  |
| 1554462_a_at | DNAJB9          | 2,134723057  | 2,159161028  | -0,02443797 |  |
| 1553417_at   | C11orf44        | -1,639579028 | -1,615132408 | -0,02444662 |  |
| 1553491_at   | KSR2            | -1,639579028 | -1,615132408 | -0,02444662 |  |
| 1561394_s_at | KIAA1755        | -1,639579028 | -1,615132408 | -0,02444662 |  |
| 1561829_at   | -               | -1,639579028 | -1,615132408 | -0,02444662 |  |
| 1562066_at   | TRIQQ           | -1,639579028 | -1,615132408 | -0,02444662 |  |
| 1564200_at   | LINC00607       | -1,639579028 | -1,615132408 | -0,02444662 |  |
| 1564584_at   | LOC100506557    | -1,639579028 | -1,615132408 | -0,02444662 |  |
| 1566720_at   | RPS10P7         | -1,639579028 | -1,615132408 | -0,02444662 |  |
| 209183_s_at  | C10orf10        | -1,639579028 | -1,615132408 | -0,02444662 |  |
| 211400_at    | FGFR2           | -1,639579028 | -1,615132408 | -0,02444662 |  |
| 211462_s_at  | TBL1Y           | -1,639579028 | -1,615132408 | -0,02444662 |  |
| 214206_at    | PPIL6           | -1,639579028 | -1,615132408 | -0,02444662 |  |
| 214250_at    | NUMA1           | -1,639579028 | -1,615132408 | -0,02444662 |  |
| 216540_at    | YME1L1          | -1,639579028 | -1,615132408 | -0,02444662 |  |
| 231574_at    | -               | -1,639579028 | -1,615132408 | -0,02444662 |  |
| 236204_at    | COPS8           | -1,639579028 | -1,615132408 | -0,02444662 |  |
| 238488_at    | IPO11 /// LRRC7 | -1,639579028 | -1,615132408 | -0,02444662 |  |
| 238851_at    | ANKRD13A        | -1,639579028 | -1,615132408 | -0,02444662 |  |
| 240587_x_at  | LOC100506219    | -1,639579028 | -1,615132408 | -0,02444662 |  |
| 241341_at    | -               | -1,639579028 | -1,615132408 | -0,02444662 |  |
| 242651_at    | -               | -1,639579028 | -1,615132408 | -0,02444662 |  |
| 243173_at    | CABP7           | -1,639579028 | -1,615132408 | -0,02444662 |  |
| 244805_at    | -               | -1,639579028 | -1,615132408 | -0,02444662 |  |
| 212048_s_at  | YARS            | 4,32026764   | 4,344716207  | -0,02444857 |  |
| 218774_at    | DCPS            | 2,669932407  | 2,694398145  | -0,02446574 |  |
| 204590_x_at  | VPS33A          | 1,512180019  | 1,536652708  | -0,02447269 |  |
| 226850_at    | SUMF1           | 1,512180019  | 1,536652708  | -0,02447269 |  |
| 202613_at    | CTPS1           | 3,899061119  | 3,923538485  | -0,02447737 |  |
| 203127_s_at  | SPTLC2          | 4,040056475  | 4,064545714  | -0,02448924 |  |
| 1557723_at   | LOC285847       | 0,133056859  | 0,157549243  | -0,02449238 |  |
| 1561423_at   | LINC00535       | 0,133056859  | 0,157549243  | -0,02449238 |  |
| 215975_x_at  | -               | 0,133056859  | 0,157549243  | -0,02449238 |  |
| 225828_at    | DAGLB           | 0,133056859  | 0,157549243  | -0,02449238 |  |
| 241862_x_at  | C19orf45        | 0,133056859  | 0,157549243  | -0,02449238 |  |
| 205313_at    | HNF1B           | 0,810733188  | 0,835239052  | -0,02450586 |  |
| 242711_x_at  | FANCM           | 0,810733188  | 0,835239052  | -0,02450586 |  |
| 225706_at    | GLCCI1          | 1,897847661  | 1,922365006  | -0,02451735 |  |
| 208667_s_at  | ST13            | 5,149552753  | 5,174092585  | -0,02453983 |  |
| 200651_at    | GNB2L1 /// LOC1 | 7,543327755  | 7,567875426  | -0,02454767 |  |
| 203795_s_at  | BCL7A           | 0,613492853  | 0,638150376  | -0,02465752 |  |
| 201488_x_at  | KHDRBS1         | 4,676134621  | 4,70080431   | -0,02466969 |  |
| 215223_s_at  | LOC100129518 /  | 3,506195778  | 3,530865925  | -0,02467015 |  |
| 1552835_at   | DENND1B         | -2,311268652 | -2,286583451 | -0,0246852  |  |
| 1558183_at   | ZNF17           | -2,311268652 | -2,286583451 | -0,0246852  |  |
| 1559695_a_at | -               | -2,311268652 | -2,286583451 | -0,0246852  |  |
| 1560582_a_at | -               | -2,311268652 | -2,286583451 | -0,0246852  |  |
| 1561303_at   | LOC100506172    | -2,311268652 | -2,286583451 | -0,0246852  |  |
| 1566462_at   | -               | -2,311268652 | -2,286583451 | -0,0246852  |  |
| 207572_at    | EFCAB2          | -2,311268652 | -2,286583451 | -0,0246852  |  |
| 208015_at    | SMAD1           | -2,311268652 | -2,286583451 | -0,0246852  |  |

|              |                |              |              |             |  |
|--------------|----------------|--------------|--------------|-------------|--|
| 210538_s_at  | BIRC3          | -2,311268652 | -2,286583451 | -0,0246852  |  |
| 217109_at    | MUC4           | -2,311268652 | -2,286583451 | -0,0246852  |  |
| 228367_at    | ALPK2          | -2,311268652 | -2,286583451 | -0,0246852  |  |
| 229764_at    | LOC100505861 / | -2,311268652 | -2,286583451 | -0,0246852  |  |
| 231962_at    | AP4B1          | -2,311268652 | -2,286583451 | -0,0246852  |  |
| 231978_at    | TPCN2          | -2,311268652 | -2,286583451 | -0,0246852  |  |
| 232574_at    | XYLT1          | -2,311268652 | -2,286583451 | -0,0246852  |  |
| 238787_at    | DENND1B        | -2,311268652 | -2,286583451 | -0,0246852  |  |
| 239199_at    | -              | -2,311268652 | -2,286583451 | -0,0246852  |  |
| 241992_at    | DRAM1          | -2,311268652 | -2,286583451 | -0,0246852  |  |
| 243474_at    | -              | -2,311268652 | -2,286583451 | -0,0246852  |  |
| 202579_x_at  | HMGN4          | 5,197340607  | 5,222034991  | -0,02469438 |  |
| 1554210_at   | ZCCHC13        | -1,688127507 | -1,663414495 | -0,02471301 |  |
| 1557514_a_at | -              | -1,688127507 | -1,663414495 | -0,02471301 |  |
| 1561000_at   | -              | -1,688127507 | -1,663414495 | -0,02471301 |  |
| 1562891_at   | -              | -1,688127507 | -1,663414495 | -0,02471301 |  |
| 211685_s_at  | NCALD          | -1,688127507 | -1,663414495 | -0,02471301 |  |
| 213952_s_at  | ALOX5          | -1,688127507 | -1,663414495 | -0,02471301 |  |
| 215512_at    | 06.03.15       | -1,688127507 | -1,663414495 | -0,02471301 |  |
| 218820_at    | C14orf132      | -1,688127507 | -1,663414495 | -0,02471301 |  |
| 221993_s_at  | C16orf42       | -1,688127507 | -1,663414495 | -0,02471301 |  |
| 224019_at    | SCD5           | -1,688127507 | -1,663414495 | -0,02471301 |  |
| 227376_at    | GLI3           | -1,688127507 | -1,663414495 | -0,02471301 |  |
| 231413_at    | -              | -1,688127507 | -1,663414495 | -0,02471301 |  |
| 233425_at    | -              | -1,688127507 | -1,663414495 | -0,02471301 |  |
| 239860_at    | LOC100130232   | -1,688127507 | -1,663414495 | -0,02471301 |  |
| 240936_at    | LOC100287290   | -1,688127507 | -1,663414495 | -0,02471301 |  |
| 241400_at    | -              | -1,688127507 | -1,663414495 | -0,02471301 |  |
| 241879_at    | LPP            | -1,688127507 | -1,663414495 | -0,02471301 |  |
| 242388_x_at  | TAGAP          | -1,688127507 | -1,663414495 | -0,02471301 |  |
| 242636_at    | PRCP           | -1,688127507 | -1,663414495 | -0,02471301 |  |
| 223613_at    | UQCR11         | 1,607231019  | 1,632095957  | -0,02486494 |  |
| 228223_at    | ZSWIM3         | 1,607231019  | 1,632095957  | -0,02486494 |  |
| 211115_x_at  | GEMIN2         | 4,120341088  | 4,145254615  | -0,02491353 |  |
| 210150_s_at  | LAMA5          | 1,119359127  | 1,144305291  | -0,02494616 |  |
| 243313_at    | SYNPO2L        | 1,119359127  | 1,144305291  | -0,02494616 |  |
| 226400_at    | LOC100505937   | 4,914950325  | 4,939943781  | -0,02499346 |  |
| 1553086_at   | C11orf40       | -2,236765673 | -2,211750327 | -0,02501535 |  |
| 1553093_a_at | DEFB119        | -2,236765673 | -2,211750327 | -0,02501535 |  |
| 1553176_at   | SH2D1B         | -2,236765673 | -2,211750327 | -0,02501535 |  |
| 1553683_s_at | FBXL14         | -2,236765673 | -2,211750327 | -0,02501535 |  |
| 1554558_at   | DCAF5          | -2,236765673 | -2,211750327 | -0,02501535 |  |
| 1564093_at   | NEK1           | -2,236765673 | -2,211750327 | -0,02501535 |  |
| 1566540_at   | -              | -2,236765673 | -2,211750327 | -0,02501535 |  |
| 1569558_at   | -              | -2,236765673 | -2,211750327 | -0,02501535 |  |
| 204438_at    | MRC1           | -2,236765673 | -2,211750327 | -0,02501535 |  |
| 206476_s_at  | NOVA2          | -2,236765673 | -2,211750327 | -0,02501535 |  |
| 211516_at    | IL5RA          | -2,236765673 | -2,211750327 | -0,02501535 |  |
| 211842_s_at  | SLC24A1        | -2,236765673 | -2,211750327 | -0,02501535 |  |
| 222020_s_at  | LOC100653217 / | -2,236765673 | -2,211750327 | -0,02501535 |  |
| 224457_at    | MGC12982       | -2,236765673 | -2,211750327 | -0,02501535 |  |
| 231283_at    | MGAT4A         | -2,236765673 | -2,211750327 | -0,02501535 |  |
| 232997_at    | -              | -2,236765673 | -2,211750327 | -0,02501535 |  |
| 233667_at    | -              | -2,236765673 | -2,211750327 | -0,02501535 |  |
| 234160_at    | -              | -2,236765673 | -2,211750327 | -0,02501535 |  |
| 235869_at    | LOC100129858   | -2,236765673 | -2,211750327 | -0,02501535 |  |

|              |                 |              |              |             |  |
|--------------|-----------------|--------------|--------------|-------------|--|
| 236714_at    | -               | -2,236765673 | -2,211750327 | -0,02501535 |  |
| 237268_at    | DSCAM           | -2,236765673 | -2,211750327 | -0,02501535 |  |
| 237743_at    | -               | -2,236765673 | -2,211750327 | -0,02501535 |  |
| 239433_at    | LRR8E           | -2,236765673 | -2,211750327 | -0,02501535 |  |
| 241146_at    | MAGI2-AS2       | -2,236765673 | -2,211750327 | -0,02501535 |  |
| 209527_at    | EXOSC2          | 2,254767157  | 2,27978304   | -0,02501588 |  |
| 211927_x_at  | EEF1G /// MIR36 | 7,688392905  | 7,713416918  | -0,02502401 |  |
| 218495_at    | UXT             | 6,36249623   | 6,387538601  | -0,02504237 |  |
| 206146_s_at  | RHAG            | 5,9738003    | 5,998864294  | -0,02506399 |  |
| 200808_s_at  | ZYX             | 2,600539826  | 2,625627364  | -0,02508754 |  |
| 209516_at    | SMYD5           | 0,962260738  | 0,987376598  | -0,02511586 |  |
| 1566785_x_at | NSF             | 0,792179257  | 0,817300337  | -0,02512108 |  |
| 211807_x_at  | PCDHGB5         | 0,792179257  | 0,817300337  | -0,02512108 |  |
| 209265_s_at  | METTL3          | 4,624194503  | 4,649344778  | -0,02515028 |  |
| 211725_s_at  | BID             | 3,112743591  | 3,137910193  | -0,0251666  |  |
| 219405_at    | TRIM68          | 2,182996494  | 2,208167653  | -0,02517116 |  |
| 1557336_at   | -               | -1,763254337 | -1,738067356 | -0,02518698 |  |
| 1557660_s_at | LOC100506733    | -1,763254337 | -1,738067356 | -0,02518698 |  |
| 1557749_at   | EHBP1L1         | -1,763254337 | -1,738067356 | -0,02518698 |  |
| 1562832_at   | C3orf65         | -1,763254337 | -1,738067356 | -0,02518698 |  |
| 1568878_at   | -               | -1,763254337 | -1,738067356 | -0,02518698 |  |
| 205954_at    | RXRG            | -1,763254337 | -1,738067356 | -0,02518698 |  |
| 207290_at    | PLXNA2          | -1,763254337 | -1,738067356 | -0,02518698 |  |
| 210918_at    | -               | -1,763254337 | -1,738067356 | -0,02518698 |  |
| 215343_at    | CCDC88C         | -1,763254337 | -1,738067356 | -0,02518698 |  |
| 217333_at    | -               | -1,763254337 | -1,738067356 | -0,02518698 |  |
| 226462_at    | STXBP6          | -1,763254337 | -1,738067356 | -0,02518698 |  |
| 230423_at    | -               | -1,763254337 | -1,738067356 | -0,02518698 |  |
| 231900_at    | ZDHHC18         | -1,763254337 | -1,738067356 | -0,02518698 |  |
| 232634_at    | DKFZp566F0947   | -1,763254337 | -1,738067356 | -0,02518698 |  |
| 234443_at    | -               | -1,763254337 | -1,738067356 | -0,02518698 |  |
| 236821_at    | -               | -1,763254337 | -1,738067356 | -0,02518698 |  |
| 237006_at    | -               | -1,763254337 | -1,738067356 | -0,02518698 |  |
| 237903_at    | -               | -1,763254337 | -1,738067356 | -0,02518698 |  |
| 240754_at    | LOC284933       | -1,763254337 | -1,738067356 | -0,02518698 |  |
| 244725_at    | DMRTA1          | -1,763254337 | -1,738067356 | -0,02518698 |  |
| 208717_at    | OXA1L           | 4,754497159  | 4,779734028  | -0,02523687 |  |
| 1560496_at   | -               | 1,247462054  | 1,272721751  | -0,0252597  |  |
| 1553409_at   | ADAMTS20        | -2,187914861 | -2,162639771 | -0,02527509 |  |
| 1555191_a_at | FHL5            | -2,187914861 | -2,162639771 | -0,02527509 |  |
| 1555564_a_at | CFI             | -2,187914861 | -2,162639771 | -0,02527509 |  |
| 1557374_at   | ABCC9           | -2,187914861 | -2,162639771 | -0,02527509 |  |
| 1560725_at   | -               | -2,187914861 | -2,162639771 | -0,02527509 |  |
| 1561149_at   | -               | -2,187914861 | -2,162639771 | -0,02527509 |  |
| 1563092_at   | -               | -2,187914861 | -2,162639771 | -0,02527509 |  |
| 1566140_at   | HOPX            | -2,187914861 | -2,162639771 | -0,02527509 |  |
| 1567140_at   | -               | -2,187914861 | -2,162639771 | -0,02527509 |  |
| 205206_at    | KAL1            | -2,187914861 | -2,162639771 | -0,02527509 |  |
| 210704_at    | FEZ2            | -2,187914861 | -2,162639771 | -0,02527509 |  |
| 213992_at    | COL4A6          | -2,187914861 | -2,162639771 | -0,02527509 |  |
| 223737_x_at  | CHST9           | -2,187914861 | -2,162639771 | -0,02527509 |  |
| 230732_s_at  | MAPK4           | -2,187914861 | -2,162639771 | -0,02527509 |  |
| 231302_at    | -               | -2,187914861 | -2,162639771 | -0,02527509 |  |
| 232957_x_at  | -               | -2,187914861 | -2,162639771 | -0,02527509 |  |
| 238371_s_at  | -               | -2,187914861 | -2,162639771 | -0,02527509 |  |
| 240953_at    | -               | -2,187914861 | -2,162639771 | -0,02527509 |  |



|              |              |              |              |             |  |
|--------------|--------------|--------------|--------------|-------------|--|
| 242803_at    | -            | -2,187914861 | -2,162639771 | -0,02527509 |  |
| 244588_at    | -            | -2,187914861 | -2,162639771 | -0,02527509 |  |
| 244658_at    | -            | -2,187914861 | -2,162639771 | -0,02527509 |  |
| 233655_s_at  | HAUS6        | 1,874520207  | 1,899812471  | -0,02529226 |  |
| 202844_s_at  | RALBP1       | 2,693452197  | 2,718761062  | -0,02530887 |  |
| 1556008_a_at | -            | -1,812418401 | -1,787089803 | -0,0253286  |  |
| 1558899_s_at | FLJ35946     | -1,812418401 | -1,787089803 | -0,0253286  |  |
| 1560062_at   | SLC29A2      | -1,812418401 | -1,787089803 | -0,0253286  |  |
| 1562597_at   | -            | -1,812418401 | -1,787089803 | -0,0253286  |  |
| 1563720_at   | -            | -1,812418401 | -1,787089803 | -0,0253286  |  |
| 1567245_at   | OR5J2        | -1,812418401 | -1,787089803 | -0,0253286  |  |
| 204130_at    | HSD11B2      | -1,812418401 | -1,787089803 | -0,0253286  |  |
| 208324_at    | -            | -1,812418401 | -1,787089803 | -0,0253286  |  |
| 214090_at    | PAWR         | -1,812418401 | -1,787089803 | -0,0253286  |  |
| 218994_s_at  | STAG3L4      | -1,812418401 | -1,787089803 | -0,0253286  |  |
| 220266_s_at  | KLF4         | -1,812418401 | -1,787089803 | -0,0253286  |  |
| 223093_at    | ANKH         | -1,812418401 | -1,787089803 | -0,0253286  |  |
| 229674_at    | SERTAD4      | -1,812418401 | -1,787089803 | -0,0253286  |  |
| 231366_at    | FDP5L2A      | -1,812418401 | -1,787089803 | -0,0253286  |  |
| 232279_at    | PHF15        | -1,812418401 | -1,787089803 | -0,0253286  |  |
| 232451_at    | -            | -1,812418401 | -1,787089803 | -0,0253286  |  |
| 232731_x_at  | LOC100190938 | -1,812418401 | -1,787089803 | -0,0253286  |  |
| 233710_at    | -            | -1,812418401 | -1,787089803 | -0,0253286  |  |
| 234843_s_at  | KREMEN1      | -1,812418401 | -1,787089803 | -0,0253286  |  |
| 238196_at    | LOC285095    | -1,812418401 | -1,787089803 | -0,0253286  |  |
| 242595_at    | TSSK4        | -1,812418401 | -1,787089803 | -0,0253286  |  |
| 243077_at    | FLJ16734     | -1,812418401 | -1,787089803 | -0,0253286  |  |
| 243148_at    | -            | -1,812418401 | -1,787089803 | -0,0253286  |  |
| 244789_at    | C10orf122    | -1,812418401 | -1,787089803 | -0,0253286  |  |
| 211450_s_at  | MSH6         | 3,566577193  | 3,591931093  | -0,0253539  |  |
| 202334_s_at  | UBE2B        | 3,243687542  | 3,269073685  | -0,02538614 |  |
| 212589_at    | RRAS2        | 4,114752306  | 4,140152555  | -0,02540025 |  |
| 212333_at    | FAM98A       | 4,653613789  | 4,679033716  | -0,02541993 |  |
| 212452_x_at  | KAT6B        | 1,104397092  | 1,129843209  | -0,02544612 |  |
| 219164_s_at  | ATG2B        | 1,104397092  | 1,129843209  | -0,02544612 |  |
| 212123_at    | TCTN3        | 3,396853889  | 3,42231092   | -0,02545703 |  |
| 235007_at    | BBS7         | 0,103263601  | 0,128747141  | -0,02548354 |  |
| 242838_at    | MAP6D1       | 0,103263601  | 0,128747141  | -0,02548354 |  |
| 226024_at    | COMMD1       | 3,614006933  | 3,639498476  | -0,02549154 |  |
| 202610_s_at  | MED14        | 3,394805732  | 3,420331607  | -0,02552588 |  |
| 232375_at    | -            | 0,779676066  | 0,805216064  | -0,02554    |  |
| 207227_x_at  | RFPL2        | -0,221656139 | -0,19610998  | -0,02554616 |  |
| 212062_at    | ATP9A        | -0,221656139 | -0,19610998  | -0,02554616 |  |
| 227835_at    | LOC389831    | -0,221656139 | -0,19610998  | -0,02554616 |  |
| 241138_at    | -            | -0,221656139 | -0,19610998  | -0,02554616 |  |
| 244095_at    | ANKFN1       | -0,221656139 | -0,19610998  | -0,02554616 |  |
| 220760_x_at  | ZNF665       | 2,586251598  | 2,611817827  | -0,02556623 |  |
| 222423_at    | NDFIP1       | 2,586251598  | 2,611817827  | -0,02556623 |  |
| 222704_at    | POLR1A       | 2,171078719  | 2,196649505  | -0,02557079 |  |
| 225256_at    | -            | 2,987866617  | 3,013449121  | -0,0255825  |  |
| 1555035_a_at | CLRN1        | -2,063149277 | -2,037551727 | -0,02559755 |  |
| 1556527_a_at | -            | -2,063149277 | -2,037551727 | -0,02559755 |  |
| 1559296_at   | ADAMTS9-AS2  | -2,063149277 | -2,037551727 | -0,02559755 |  |
| 1559513_a_at | FANCC        | -2,063149277 | -2,037551727 | -0,02559755 |  |
| 216716_at    | ABO          | -2,063149277 | -2,037551727 | -0,02559755 |  |
| 217422_s_at  | CD22         | -2,063149277 | -2,037551727 | -0,02559755 |  |

|              |                  |              |              |             |  |
|--------------|------------------|--------------|--------------|-------------|--|
| 217701_x_at  | -                | -2,063149277 | -2,037551727 | -0,02559755 |  |
| 221070_s_at  | KIAA1967         | -2,063149277 | -2,037551727 | -0,02559755 |  |
| 221900_at    | COL8A2           | -2,063149277 | -2,037551727 | -0,02559755 |  |
| 224104_at    | -                | -2,063149277 | -2,037551727 | -0,02559755 |  |
| 227800_at    | FAM110B          | -2,063149277 | -2,037551727 | -0,02559755 |  |
| 229275_at    | IGFN1            | -2,063149277 | -2,037551727 | -0,02559755 |  |
| 236177_s_at  | -                | -2,063149277 | -2,037551727 | -0,02559755 |  |
| 239865_at    | -                | -2,063149277 | -2,037551727 | -0,02559755 |  |
| 241100_at    | -                | -2,063149277 | -2,037551727 | -0,02559755 |  |
| 243765_at    | -                | -2,063149277 | -2,037551727 | -0,02559755 |  |
| 244485_at    | HLA-DPB1         | -2,063149277 | -2,037551727 | -0,02559755 |  |
| 244529_at    | -                | -2,063149277 | -2,037551727 | -0,02559755 |  |
| 244649_at    | LOC646484        | -2,063149277 | -2,037551727 | -0,02559755 |  |
| 1555555_at   | BBS9             | -1,888254346 | -1,862647763 | -0,02560658 |  |
| 1563941_at   | -                | -1,888254346 | -1,862647763 | -0,02560658 |  |
| 206640_x_at  | GAGE12B /// GAGE | -1,888254346 | -1,862647763 | -0,02560658 |  |
| 206879_s_at  | NRG2             | -1,888254346 | -1,862647763 | -0,02560658 |  |
| 216703_at    | -                | -1,888254346 | -1,862647763 | -0,02560658 |  |
| 216743_at    | -                | -1,888254346 | -1,862647763 | -0,02560658 |  |
| 217420_s_at  | POLR2A           | -1,888254346 | -1,862647763 | -0,02560658 |  |
| 220881_at    | -                | -1,888254346 | -1,862647763 | -0,02560658 |  |
| 222314_x_at  | EGOT             | -1,888254346 | -1,862647763 | -0,02560658 |  |
| 233363_at    | -                | -1,888254346 | -1,862647763 | -0,02560658 |  |
| 233799_at    | -                | -1,888254346 | -1,862647763 | -0,02560658 |  |
| 234018_s_at  | SEL1L2           | -1,888254346 | -1,862647763 | -0,02560658 |  |
| 237545_at    | -                | -1,888254346 | -1,862647763 | -0,02560658 |  |
| 238323_at    | TEAD2            | -1,888254346 | -1,862647763 | -0,02560658 |  |
| 240632_at    | -                | -1,888254346 | -1,862647763 | -0,02560658 |  |
| 241089_at    | -                | -1,888254346 | -1,862647763 | -0,02560658 |  |
| 242336_at    | GSK3B            | -1,888254346 | -1,862647763 | -0,02560658 |  |
| 244080_at    | -                | -1,888254346 | -1,862647763 | -0,02560658 |  |
| 1556226_at   | -                | -1,937711681 | -1,912089812 | -0,02562187 |  |
| 1557501_a_at | -                | -1,937711681 | -1,912089812 | -0,02562187 |  |
| 1559583_at   | CD276            | -1,937711681 | -1,912089812 | -0,02562187 |  |
| 1561559_at   | -                | -1,937711681 | -1,912089812 | -0,02562187 |  |
| 1569491_at   | -                | -1,937711681 | -1,912089812 | -0,02562187 |  |
| 204721_s_at  | DNAJC6           | -1,937711681 | -1,912089812 | -0,02562187 |  |
| 204802_at    | RRAD             | -1,937711681 | -1,912089812 | -0,02562187 |  |
| 205898_at    | CX3CR1           | -1,937711681 | -1,912089812 | -0,02562187 |  |
| 206162_x_at  | SYT5             | -1,937711681 | -1,912089812 | -0,02562187 |  |
| 210753_s_at  | EPHB1            | -1,937711681 | -1,912089812 | -0,02562187 |  |
| 210806_at    | TTLL5            | -1,937711681 | -1,912089812 | -0,02562187 |  |
| 214215_s_at  | LARP4B           | -1,937711681 | -1,912089812 | -0,02562187 |  |
| 215125_s_at  | UGT1A1 /// UGT1  | -1,937711681 | -1,912089812 | -0,02562187 |  |
| 216002_at    | -                | -1,937711681 | -1,912089812 | -0,02562187 |  |
| 217233_at    | -                | -1,937711681 | -1,912089812 | -0,02562187 |  |
| 219782_s_at  | ZNF771           | -1,937711681 | -1,912089812 | -0,02562187 |  |
| 226415_at    | VAT1L            | -1,937711681 | -1,912089812 | -0,02562187 |  |
| 235270_at    | ZNF397           | -1,937711681 | -1,912089812 | -0,02562187 |  |
| 237134_at    | -                | -1,937711681 | -1,912089812 | -0,02562187 |  |
| 239155_at    | CXADR            | -1,937711681 | -1,912089812 | -0,02562187 |  |
| 241736_at    | FBXW2            | -1,937711681 | -1,912089812 | -0,02562187 |  |
| 241946_at    | ZDHHC21          | -1,937711681 | -1,912089812 | -0,02562187 |  |
| 226276_at    | TMEM167A         | 5,299405017  | 5,325074144  | -0,02566913 |  |
| 201805_at    | PRKAG1           | 2,47626436   | 2,501934108  | -0,02566975 |  |
| 1554155_at   | MCPH1            | 2,097427503  | 2,123108223  | -0,02568072 |  |

|              |                |             |              |             |  |
|--------------|----------------|-------------|--------------|-------------|--|
| 1556121_at   | NAP1L1         | 2,097427503 | 2,123108223  | -0,02568072 |  |
| 1559954_s_at | DDX42          | 2,097427503 | 2,123108223  | -0,02568072 |  |
| 238794_at    | SFR1           | 1,233777334 | 1,259496994  | -0,02571966 |  |
| 200083_at    | USP22          | 4,373240364 | 4,398994417  | -0,02575405 |  |
| 217717_s_at  | YWHAB          | 5,699393835 | 5,725205755  | -0,02581192 |  |
| 210460_s_at  | PSMD4          | 4,55296954  | 4,578781665  | -0,02581212 |  |
| 200911_s_at  | TACC1          | 3,792633459 | 3,818491075  | -0,02585762 |  |
| 218809_at    | PANK2          | 4,523746101 | 4,549651379  | -0,02590528 |  |
| 226354_at    | LACTB          | 4,352811731 | 4,378751229  | -0,0259395  |  |
| 231862_at    | CBX5           | 2,81177561  | 2,837730973  | -0,02595536 |  |
| 1555680_a_at | SMOX           | 1,089278259 | 1,115234684  | -0,02595643 |  |
| 200953_s_at  | CCND2          | 1,089278259 | 1,115234684  | -0,02595643 |  |
| 1553042_a_at | NFKBID         | 0,351548291 | 0,377530647  | -0,02598236 |  |
| 226937_at    | CRLS1          | 0,351548291 | 0,377530647  | -0,02598236 |  |
| 235417_at    | SPOCD1         | 0,351548291 | 0,377530647  | -0,02598236 |  |
| 210036_s_at  | KCNH2          | 4,494396751 | 4,520382831  | -0,02598608 |  |
| 220094_s_at  | CCDC90A        | 4,718920906 | 4,74496648   | -0,02604557 |  |
| 201683_x_at  | TOX4           | 2,288253583 | 2,314300277  | -0,02604669 |  |
| 1554569_a_at | CELF2          | 0,934330293 | 0,960386719  | -0,02605643 |  |
| 218950_at    | ARAP3          | 2,406821352 | 2,432926755  | -0,0261054  |  |
| 212024_x_at  | FLII           | 3,120200849 | 3,146317015  | -0,02611617 |  |
| 1552834_at   | B3GNT6         | -0,67289328 | -0,646746079 | -0,0261472  |  |
| 1555978_s_at | MYL12A         | -0,67289328 | -0,646746079 | -0,0261472  |  |
| 1563089_at   | -              | -0,67289328 | -0,646746079 | -0,0261472  |  |
| 205868_s_at  | PTPN11         | -0,67289328 | -0,646746079 | -0,0261472  |  |
| 216789_at    | -              | -0,67289328 | -0,646746079 | -0,0261472  |  |
| 220458_at    | -              | -0,67289328 | -0,646746079 | -0,0261472  |  |
| 222033_s_at  | FLT1           | -0,67289328 | -0,646746079 | -0,0261472  |  |
| 233236_at    | TSPAN16        | -0,67289328 | -0,646746079 | -0,0261472  |  |
| 237900_at    | KLHDC4 /// LOC | -0,67289328 | -0,646746079 | -0,0261472  |  |
| 214123_s_at  | NOP14-AS1      | 0,083054335 | 0,109221392  | -0,02616706 |  |
| 242749_at    | -              | 0,083054335 | 0,109221392  | -0,02616706 |  |
| 244509_at    | GPR155         | 0,083054335 | 0,109221392  | -0,02616706 |  |
| 204532_x_at  | UGT1A1 /// UGT | 0,760715727 | 0,786897721  | -0,02618199 |  |
| 224785_at    | FAM100B        | 0,760715727 | 0,786897721  | -0,02618199 |  |
| 223533_at    | LRRC8C         | 2,151803104 | 2,17802703   | -0,02622393 |  |
| 53720_at     | C19orf66       | 3,281868968 | 3,308133107  | -0,02626414 |  |
| 222443_s_at  | RBM8A          | 5,320328682 | 5,346600356  | -0,02627167 |  |
| 200996_at    | ACTR3          | 5,926556177 | 5,952877545  | -0,02632137 |  |
| 208335_s_at  | DARC           | 2,456762221 | 2,483094137  | -0,02633192 |  |
| 212320_at    | TUBB           | 6,383951227 | 6,410342229  | -0,026391   |  |
| 235347_at    | LRCH3          | 1,923647937 | 1,950068772  | -0,02642084 |  |
| 207574_s_at  | GADD45B        | 1,210676994 | 1,23718272   | -0,02650573 |  |
| 211144_x_at  | TARP /// TRGC2 | 3,242549117 | 3,269073685  | -0,02652457 |  |
| 202368_s_at  | TRAM2          | 2,794789337 | 2,821324225  | -0,02653489 |  |
| 205129_at    | NPM3           | 3,919150955 | 3,945725977  | -0,02657502 |  |
| 214214_s_at  | C1QBP          | 6,03376536  | 6,060370018  | -0,02660466 |  |
| 218518_at    | FAM13B         | 1,917954284 | 1,944570415  | -0,02661613 |  |
| 208729_x_at  | HLA-B          | 5,434149491 | 5,460778694  | -0,0266292  |  |
| 218576_s_at  | DUSP12         | 3,791855421 | 3,818491075  | -0,02663565 |  |
| 233445_at    | -              | 2,139623739 | 2,166264721  | -0,02664098 |  |
| 200781_s_at  | RPS15A         | 7,783777692 | 7,810455669  | -0,02667798 |  |
| 203612_at    | BYSL           | 4,138203514 | 4,164893351  | -0,02668984 |  |
| 201391_at    | TRAP1          | 4,688310136 | 4,715003086  | -0,02669295 |  |
| 218351_at    | COMMD8         | 3,895444023 | 3,922140371  | -0,02669635 |  |
| 223406_x_at  | FAM192A        | 3,067171967 | 3,09388391   | -0,02671194 |  |

|              |                 |              |              |             |  |
|--------------|-----------------|--------------|--------------|-------------|--|
| 203478_at    | NDUFC1          | 5,674072737  | 5,700850431  | -0,02677769 |  |
| 200613_at    | AP2M1           | 4,709064075  | 4,735843687  | -0,02677961 |  |
| 201779_s_at  | RNF13           | 2,912562019  | 2,939363796  | -0,02680178 |  |
| 243790_at    | ZNF585A         | 2,912562019  | 2,939363796  | -0,02680178 |  |
| 201078_at    | TM9SF2          | 5,523564805  | 5,550381481  | -0,02681668 |  |
| 219815_at    | GAL3ST4         | 1,649074067  | 1,675891488  | -0,02681742 |  |
| 217619_x_at  | -               | 1,442503549  | 1,469325098  | -0,02682155 |  |
| 218496_at    | RNASEH1         | 2,493593689  | 2,520531219  | -0,02693753 |  |
| 203356_at    | CAPN7           | 3,095191939  | 3,122166354  | -0,02697442 |  |
| 40612_at     | DOPEY1          | -0,089485672 | -0,062456113 | -0,02702956 |  |
| 209890_at    | TSPAN5          | 2,983784569  | 3,010820719  | -0,02703615 |  |
| 224865_at    | FAR1            | 2,779171778  | 2,806245339  | -0,02707356 |  |
| 50277_at     | GGA1            | 3,95364875   | 3,980732625  | -0,02708387 |  |
| 220962_s_at  | PADI1           | 0,541261317  | 0,568365095  | -0,02710378 |  |
| 235857_at    | KCTD11          | 0,541261317  | 0,568365095  | -0,02710378 |  |
| 219184_x_at  | TIMM22          | 1,903621061  | 1,930732138  | -0,02711108 |  |
| 228516_at    | CDAN1           | 2,37600538   | 2,403170156  | -0,02716478 |  |
| 201887_at    | IL13RA1         | 1,638726528  | 1,665902186  | -0,02717566 |  |
| 206536_s_at  | XIAP            | -0,706943342 | -0,679763839 | -0,0271795  |  |
| 206564_at    | OPRL1           | -0,706943342 | -0,679763839 | -0,0271795  |  |
| 217609_at    | LRRC23 /// RPL1 | -0,706943342 | -0,679763839 | -0,0271795  |  |
| 219468_s_at  | CUEDC1          | -0,706943342 | -0,679763839 | -0,0271795  |  |
| 223676_at    | TMEM234         | -0,706943342 | -0,679763839 | -0,0271795  |  |
| 232579_at    | LOC100134229    | -0,706943342 | -0,679763839 | -0,0271795  |  |
| 232708_at    | GALT            | -0,706943342 | -0,679763839 | -0,0271795  |  |
| 233138_at    | C18orf1         | -0,706943342 | -0,679763839 | -0,0271795  |  |
| 234545_at    | OR14J1          | -0,706943342 | -0,679763839 | -0,0271795  |  |
| 235628_x_at  | FLJ33630        | -0,706943342 | -0,679763839 | -0,0271795  |  |
| 243889_at    | -               | -0,706943342 | -0,679763839 | -0,0271795  |  |
| 244043_at    | TFDP2           | -0,706943342 | -0,679763839 | -0,0271795  |  |
| 244175_at    | LINC00577       | -0,706943342 | -0,679763839 | -0,0271795  |  |
| 214513_s_at  | CREB1           | 1,05337236   | 1,080561626  | -0,02718927 |  |
| 223619_x_at  | PECR            | 1,05337236   | 1,080561626  | -0,02718927 |  |
| 233173_x_at  | GTF3C5          | 3,818840142  | 3,846031735  | -0,02719159 |  |
| 1553657_at   | VWA3A           | 0,052199481  | 0,079428135  | -0,02722865 |  |
| 1554017_at   | RILPL1 /// SNRN | 0,052199481  | 0,079428135  | -0,02722865 |  |
| 1554222_at   | MGC45922        | 0,052199481  | 0,079428135  | -0,02722865 |  |
| 1566425_at   | -               | 0,052199481  | 0,079428135  | -0,02722865 |  |
| 219594_at    | NINJ2           | 0,052199481  | 0,079428135  | -0,02722865 |  |
| 226964_at    | TTBK2           | 0,052199481  | 0,079428135  | -0,02722865 |  |
| 217772_s_at  | MTCH2           | 5,221809581  | 5,249050572  | -0,02724099 |  |
| 215416_s_at  | STOML2          | 4,636381066  | 4,66363827   | -0,0272572  |  |
| 203342_at    | TIMM17B         | 3,957816838  | 3,985091175  | -0,02727434 |  |
| 1559795_at   | -               | 0,728550685  | 0,755840599  | -0,02728991 |  |
| 1554321_a_at | NFS1            | 1,187200746  | 1,214517879  | -0,02731713 |  |
| 218060_s_at  | C16orf57        | 1,534677255  | 1,562009954  | -0,0273327  |  |
| 229622_at    | FAM132B         | 1,534677255  | 1,562009954  | -0,0273327  |  |
| 221798_x_at  | -               | 8,24468343   | 8,272026873  | -0,02734344 |  |
| 209039_x_at  | EHD1            | 2,771299138  | 2,798646381  | -0,02734724 |  |
| 202689_at    | RBM15B          | 2,185368281  | 2,212749286  | -0,02738101 |  |
| 217950_at    | NOSIP           | 4,279776324  | 4,307183466  | -0,02740714 |  |
| 207081_s_at  | PI4KA           | 1,631786706  | 1,659204017  | -0,02741731 |  |
| 206075_s_at  | CSNK2A1 /// CSN | 3,952952896  | 3,980396806  | -0,02744391 |  |
| 225635_s_at  | LOC100506710    | 2,893830579  | 2,921282473  | -0,02745189 |  |
| 226522_at    | PODN            | 0,30867765   | 0,336136178  | -0,02745853 |  |
| 202395_at    | LOC100507699 /  | 4,24665816   | 4,274138329  | -0,02748017 |  |

|              |          |              |              |             |  |
|--------------|----------|--------------|--------------|-------------|--|
| 209780_at    | PHTF2    | 3,831009889  | 3,858511405  | -0,02750152 |  |
| 224711_at    | YY1      | 4,181024227  | 4,208556964  | -0,02753274 |  |
| 226542_at    | -        | 3,078700536  | 3,106248809  | -0,02754827 |  |
| 202428_x_at  | DBI      | 5,850322537  | 5,877874624  | -0,02755209 |  |
| 206702_at    | TEK      | 2,675004741  | 2,702564916  | -0,02756017 |  |
| 213483_at    | PPWD1    | 3,211467103  | 3,239069096  | -0,02760199 |  |
| 218907_s_at  | LRRC61   | 2,303618506  | 2,331254065  | -0,02763556 |  |
| 200609_s_at  | WDR1     | 5,473012156  | 5,500666341  | -0,02765418 |  |
| 225512_at    | ZBTB38   | 3,177319542  | 3,204982027  | -0,02766249 |  |
| 217804_s_at  | ILF3     | 4,525151199  | 4,552816898  | -0,0276657  |  |
| 219444_at    | BCORL1   | 2,038300149  | 2,066015817  | -0,02771567 |  |
| 204440_at    | CD83     | 1,716223609  | 1,743944487  | -0,02772088 |  |
| 209721_s_at  | IFFO1    | 1,716223609  | 1,743944487  | -0,02772088 |  |
| 205986_at    | AATK     | -0,285837228 | -0,258114234 | -0,02772299 |  |
| 215321_at    | RUNDC3B  | -0,285837228 | -0,258114234 | -0,02772299 |  |
| 223080_at    | GLS      | -0,285837228 | -0,258114234 | -0,02772299 |  |
| 233846_at    | CCDC85A  | -0,285837228 | -0,258114234 | -0,02772299 |  |
| 238607_at    | ZNF296   | -0,285837228 | -0,258114234 | -0,02772299 |  |
| 216843_x_at  | PMS2P1   | 2,669932407  | 2,697670403  | -0,027738   |  |
| 218462_at    | RPF1     | 5,06851491   | 5,096265831  | -0,02775092 |  |
| 243904_at    | STXBP5   | 3,037284587  | 3,065035915  | -0,02775133 |  |
| 219459_at    | POLR3B   | 3,072307152  | 3,100079607  | -0,02777245 |  |
| 200698_at    | KDEL2    | 4,372199749  | 4,399999158  | -0,02779941 |  |
| 201036_s_at  | HADH     | 3,139900454  | 3,16771226   | -0,02781181 |  |
| 219569_s_at  | SLC35G2  | 2,882181479  | 2,910041809  | -0,02786033 |  |
| 210372_s_at  | TPD52L1  | 1,296557217  | 1,324440845  | -0,02788363 |  |
| 1555495_a_at | CWC27    | 3,202127528  | 3,23005767   | -0,02793014 |  |
| 228935_at    | SLC4A8   | 0,03125738   | 0,059218869  | -0,02796149 |  |
| 235911_at    | MFI2     | 1,515954005  | 1,543943227  | -0,02798922 |  |
| 201118_at    | PGD      | 4,263031594  | 4,291026333  | -0,02799474 |  |
| 220751_s_at  | C5orf4   | 1,614289682  | 1,642321262  | -0,02803158 |  |
| 210588_x_at  | HNRNPH3  | 5,313839513  | 5,341902527  | -0,02806301 |  |
| 228905_at    | PCM1     | 1,163336153  | 1,191491281  | -0,02815513 |  |
| 210779_x_at  | GEMIN2   | 3,402980973  | 3,431184377  | -0,0282034  |  |
| 208091_s_at  | VOPP1    | 3,059434754  | 3,087661492  | -0,02822674 |  |
| 225459_at    | AMOTL1   | 1,40228911   | 1,43051703   | -0,02822792 |  |
| 217336_at    | -        | 2,344516784  | 2,372786857  | -0,02827007 |  |
| 230427_s_at  | BAG5     | 2,344516784  | 2,372786857  | -0,02827007 |  |
| 222998_at    | MAF1     | 3,532516649  | 3,560823412  | -0,02830676 |  |
| 202199_s_at  | SRPK1    | 2,605861638  | 2,634191677  | -0,02833004 |  |
| 48659_at     | MIIP     | 2,28383338   | 2,312166977  | -0,0283336  |  |
| 231319_x_at  | KIF9     | 3,866915053  | 3,895315489  | -0,02840044 |  |
| 227274_at    | SYNJ2BP  | 2,220484971  | 2,248887791  | -0,02840282 |  |
| 205344_at    | CSPG5    | 0,503742507  | 0,532164371  | -0,02842186 |  |
| 207606_s_at  | ARHGAP12 | 0,503742507  | 0,532164371  | -0,02842186 |  |
| 217224_at    | -        | 0,503742507  | 0,532164371  | -0,02842186 |  |
| 223763_at    | DTNBP1   | 0,503742507  | 0,532164371  | -0,02842186 |  |
| 232156_at    | -        | 0,503742507  | 0,532164371  | -0,02842186 |  |
| 235747_at    | SLC25A16 | 0,503742507  | 0,532164371  | -0,02842186 |  |
| 242810_x_at  | -        | 0,503742507  | 0,532164371  | -0,02842186 |  |
| 201208_s_at  | TNFAIP1  | 0,695652136  | 0,724100169  | -0,02844803 |  |
| 210796_x_at  | SIGLEC6  | 0,695652136  | 0,724100169  | -0,02844803 |  |
| 200899_s_at  | MGEA5    | 5,048623266  | 5,077234589  | -0,02861132 |  |
| 209773_s_at  | RRM2     | 6,154588959  | 6,183200519  | -0,02861156 |  |
| 203336_s_at  | ITGB1BP1 | 3,182077878  | 3,210719429  | -0,02864155 |  |
| 203275_at    | IRF2     | 1,596577845  | 1,6252386    | -0,02866076 |  |

|              |                 |              |              |             |  |
|--------------|-----------------|--------------|--------------|-------------|--|
| 207000_s_at  | PPP3CC          | 1,596577845  | 1,6252386    | -0,02866076 |  |
| 1552634_a_at | ZNF101          | 1,390002893  | 1,418668082  | -0,02866519 |  |
| 209051_s_at  | RALGDS          | 1,390002893  | 1,418668082  | -0,02866519 |  |
| 235613_at    | -               | 1,390002893  | 1,418668082  | -0,02866519 |  |
| 232008_s_at  | BBX             | 1,274448124  | 1,303116084  | -0,02866796 |  |
| 202292_x_at  | LYPLA2          | 3,917011805  | 3,945725977  | -0,02871417 |  |
| 221923_s_at  | NPM1            | 6,495075526  | 6,523806602  | -0,02873108 |  |
| 201591_s_at  | NISCH           | 3,954344268  | 3,983081173  | -0,0287369  |  |
| 211714_x_at  | TUBB            | 6,999066253  | 7,027811739  | -0,02874549 |  |
| 1553493_a_at | TDH             | -0,759588698 | -0,730778808 | -0,02880989 |  |
| 206597_at    | NRL             | -0,759588698 | -0,730778808 | -0,02880989 |  |
| 210587_at    | INHBE           | -0,759588698 | -0,730778808 | -0,02880989 |  |
| 211141_s_at  | CNOT3           | -0,759588698 | -0,730778808 | -0,02880989 |  |
| 219562_at    | RAB26           | -0,759588698 | -0,730778808 | -0,02880989 |  |
| 221880_s_at  | FAM174B         | -0,759588698 | -0,730778808 | -0,02880989 |  |
| 223961_s_at  | CISH            | -0,759588698 | -0,730778808 | -0,02880989 |  |
| 226442_at    | ABTB1           | -0,759588698 | -0,730778808 | -0,02880989 |  |
| 231116_at    | -               | -0,759588698 | -0,730778808 | -0,02880989 |  |
| 231452_at    | HRASLS5         | -0,759588698 | -0,730778808 | -0,02880989 |  |
| 233747_at    | -               | -0,759588698 | -0,730778808 | -0,02880989 |  |
| 234246_at    | -               | -0,759588698 | -0,730778808 | -0,02880989 |  |
| 234306_s_at  | SLAMF7          | -0,759588698 | -0,730778808 | -0,02880989 |  |
| 235861_at    | -               | -0,759588698 | -0,730778808 | -0,02880989 |  |
| 238456_at    | LOC100289230    | -0,759588698 | -0,730778808 | -0,02880989 |  |
| 241552_at    | AA06            | -0,759588698 | -0,730778808 | -0,02880989 |  |
| 241781_at    | C9orf41         | -0,759588698 | -0,730778808 | -0,02880989 |  |
| 222572_at    | PDP1            | 2,491678455  | 2,520531219  | -0,02885276 |  |
| 242517_at    | KISS1R          | 3,638448528  | 3,667303849  | -0,02885532 |  |
| 241937_s_at  | WDR4            | 4,996900786  | 5,025764514  | -0,02886373 |  |
| 202832_at    | GCC2            | 2,26825514   | 2,297144887  | -0,02888975 |  |
| 223857_x_at  | EMC4            | 5,218194544  | 5,247097694  | -0,02890315 |  |
| 235872_at    | -               | 2,003776245  | 2,032717854  | -0,02894161 |  |
| 200788_s_at  | PEA15           | 3,266269388  | 3,295230443  | -0,02896106 |  |
| 213634_s_at  | TRMU            | 1,850809354  | 1,879785595  | -0,02897624 |  |
| 224576_at    | ERGIC1          | 3,634982121  | 3,663961904  | -0,02897978 |  |
| 218625_at    | NRN1            | 1,767779954  | 1,796776588  | -0,02899663 |  |
| 209295_at    | TNFRSF10B       | 3,680249569  | 3,709248632  | -0,02899906 |  |
| 212263_at    | QKI             | 4,512927979  | 4,541934651  | -0,02900667 |  |
| 1555872_a_at | LOC728903 /// M | 1,139070151  | 1,16809119   | -0,02902104 |  |
| 206337_at    | CCR7            | 1,139070151  | 1,16809119   | -0,02902104 |  |
| 223302_s_at  | ZNF655          | 1,139070151  | 1,16809119   | -0,02902104 |  |
| 225833_at    | DAGLB           | 1,139070151  | 1,16809119   | -0,02902104 |  |
| 208682_s_at  | MAGED2          | 5,621619186  | 5,650659434  | -0,02904025 |  |
| 201291_s_at  | TOP2A           | 4,43384374   | 4,462889331  | -0,02904559 |  |
| 1553979_at   | -               | 5,053824781  | 5,082876522  | -0,02905174 |  |
| 1558420_at   | C14orf180       | -0,00073712  | 0,028364014  | -0,02910113 |  |
| 205102_at    | TMPRSS2         | -0,00073712  | 0,028364014  | -0,02910113 |  |
| 206511_s_at  | SIX2            | -0,00073712  | 0,028364014  | -0,02910113 |  |
| 229867_at    | BTBD9           | -0,00073712  | 0,028364014  | -0,02910113 |  |
| 230615_at    | DUOXA2          | -0,00073712  | 0,028364014  | -0,02910113 |  |
| 233060_at    | ZMIZ1           | -0,00073712  | 0,028364014  | -0,02910113 |  |
| 233782_at    | DCAF7           | -0,00073712  | 0,028364014  | -0,02910113 |  |
| 235673_at    | -               | -0,00073712  | 0,028364014  | -0,02910113 |  |
| 241354_at    | ASMTL-AS1       | -0,00073712  | 0,028364014  | -0,02910113 |  |
| 223106_at    | TMEM14C         | 6,01154863   | 6,040695015  | -0,02914639 |  |
| 231959_at    | LIN52           | 1,844820248  | 1,874012195  | -0,02919195 |  |

|              |                |              |              |             |  |
|--------------|----------------|--------------|--------------|-------------|--|
| 200954_at    | ATP6V0C        | 3,556534813  | 3,585762986  | -0,02922817 |  |
| 226721_at    | DPY19L4        | 2,197169074  | 2,226407528  | -0,02923845 |  |
| 235024_at    | PHF17          | 1,672933557  | 1,702196344  | -0,02926279 |  |
| 216237_s_at  | MCM5           | 4,114129991  | 4,143455947  | -0,02932596 |  |
| 212787_at    | YLPM1          | 3,667581479  | 3,697038015  | -0,02945654 |  |
| 220605_s_at  | SIRT2          | 2,876321464  | 2,905803877  | -0,02948241 |  |
| 222976_s_at  | TPM3           | 6,538974274  | 6,568505252  | -0,02953098 |  |
| 217971_at    | LAMTOR3        | 4,931293191  | 4,960861351  | -0,02956816 |  |
| 213323_s_at  | ZC3H7B         | 1,751865623  | 1,781437557  | -0,02957193 |  |
| 218695_at    | EXOSC4         | 4,707414703  | 4,737036893  | -0,02962219 |  |
| 204148_s_at  | POMZP3 /// ZP3 | 0,984222186  | 1,013870809  | -0,02964862 |  |
| 204858_s_at  | TYMP           | 0,984222186  | 1,013870809  | -0,02964862 |  |
| 205461_at    | RAB35          | 0,984222186  | 1,013870809  | -0,02964862 |  |
| 241408_at    | CRIPAK         | 0,661985843  | 0,691645685  | -0,02965984 |  |
| 209788_s_at  | ERAP1          | 1,829737795  | 1,859476797  | -0,029739   |  |
| 226254_s_at  | KIAA1430       | 4,244385102  | 4,274138329  | -0,02975323 |  |
| 217223_s_at  | BCR            | 0,46522187   | 0,495031851  | -0,02980998 |  |
| 210534_s_at  | B9D1           | 1,655931423  | 1,685812099  | -0,02988068 |  |
| 218624_s_at  | LOC100287195 / | 1,655931423  | 1,685812099  | -0,02988068 |  |
| 213107_at    | TNIK           | 3,700289946  | 3,730171924  | -0,02988198 |  |
| 201647_s_at  | SCARB2         | -0,022466681 | 0,007421914  | -0,02988859 |  |
| 206429_at    | F2RL1          | -0,022466681 | 0,007421914  | -0,02988859 |  |
| 209114_at    | TSPAN1         | -0,022466681 | 0,007421914  | -0,02988859 |  |
| 1553071_a_at | MYOZ3          | -0,79540287  | -0,765504029 | -0,02989884 |  |
| 1558275_at   | -              | -0,79540287  | -0,765504029 | -0,02989884 |  |
| 213768_s_at  | ASCL1          | -0,79540287  | -0,765504029 | -0,02989884 |  |
| 217523_at    | CD44           | -0,79540287  | -0,765504029 | -0,02989884 |  |
| 222351_at    | PPP2R1B        | -0,79540287  | -0,765504029 | -0,02989884 |  |
| 222693_at    | FNDC3B         | -0,79540287  | -0,765504029 | -0,02989884 |  |
| 224229_s_at  | AKT3           | -0,79540287  | -0,765504029 | -0,02989884 |  |
| 229324_x_at  | ISYNA1         | -0,79540287  | -0,765504029 | -0,02989884 |  |
| 229911_at    | TPM2           | -0,79540287  | -0,765504029 | -0,02989884 |  |
| 230919_at    | ZNF233         | -0,79540287  | -0,765504029 | -0,02989884 |  |
| 241763_s_at  | FBXO32         | -0,79540287  | -0,765504029 | -0,02989884 |  |
| 225508_at    | KIAA1468       | 2,327437554  | 2,357351836  | -0,02991428 |  |
| 221827_at    | RBCK1          | 3,823415835  | 3,853385784  | -0,02996995 |  |
| 213453_x_at  | GAPDH          | 7,702381954  | 7,732386964  | -0,03000501 |  |
| 39582_at     | CYLD           | -0,178347566 | -0,148342547 | -0,03000502 |  |
| 223368_s_at  | NTMT1          | 3,50998543   | 3,540009821  | -0,03002439 |  |
| 213803_at    | -              | 3,717599787  | 3,747642277  | -0,03004249 |  |
| 217591_at    | -              | -0,352951799 | -0,322870281 | -0,03008152 |  |
| 228607_at    | OAS2           | -0,352951799 | -0,322870281 | -0,03008152 |  |
| 239780_at    | -              | -0,352951799 | -0,322870281 | -0,03008152 |  |
| 205885_s_at  | ITGA4          | 2,737756747  | 2,767843855  | -0,03008711 |  |
| 225812_at    | C6orf225       | 1,348276312  | 1,378453643  | -0,03017733 |  |
| 217830_s_at  | NSFL1C         | 2,171078719  | 2,201267805  | -0,03018909 |  |
| 204045_at    | TCEAL1         | 2,691784869  | 2,721978587  | -0,03019372 |  |
| 209306_s_at  | SWAP70         | 2,035673598  | 2,066015817  | -0,03034222 |  |
| 34471_at     | MYH8           | -2,447295818 | -2,416930122 | -0,0303657  |  |
| 213414_s_at  | RPS19          | 8,048728451  | 8,07910137   | -0,03037292 |  |
| 213729_at    | PRPF40A        | 3,791855421  | 3,822243651  | -0,03038823 |  |
| 202153_s_at  | NUP62          | 5,050901237  | 5,08131153   | -0,03041029 |  |
| 218531_at    | TMEM134        | 0,641402394  | 0,67181667   | -0,03041428 |  |
| 223894_s_at  | AKTIP          | 0,641402394  | 0,67181667   | -0,03041428 |  |
| 225255_at    | MRPL35         | 0,641402394  | 0,67181667   | -0,03041428 |  |
| 232398_at    | CCDC150        | 0,641402394  | 0,67181667   | -0,03041428 |  |

|              |                |              |              |             |  |
|--------------|----------------|--------------|--------------|-------------|--|
| 233573_s_at  | WDR6           | 1,339784194  | 1,370274469  | -0,03049027 |  |
| 239748_x_at  | OCIAD1         | 2,546213279  | 2,576704359  | -0,03049108 |  |
| 203347_s_at  | MTF2           | 3,253893136  | 3,284389368  | -0,03049623 |  |
| 49077_at     | PPME1          | 3,253328048  | 3,28384517   | -0,03051712 |  |
| 207760_s_at  | NCOR2          | 2,392522438  | 2,423075926  | -0,03055349 |  |
| 221647_s_at  | RIC8A          | 2,637386731  | 2,667949403  | -0,03056267 |  |
| 202683_s_at  | RNMT           | 3,191547726  | 3,222126232  | -0,03057851 |  |
| 212870_at    | SOS2           | 3,191547726  | 3,222126232  | -0,03057851 |  |
| 209486_at    | UTP3           | 4,095965104  | 4,126559358  | -0,03059425 |  |
| 218071_s_at  | MKRN2          | 2,44295215   | 2,473581079  | -0,03062893 |  |
| 233136_at    | PABPC5         | -3,37835     | -3,347710726 | -0,03063927 |  |
| 1558822_at   | -              | 0,95671774   | 0,987376598  | -0,03065886 |  |
| 244364_at    | MYO3A          | 0,95671774   | 0,987376598  | -0,03065886 |  |
| 206247_at    | MICB           | 4,107892039  | 4,138648509  | -0,03075647 |  |
| 208453_s_at  | XPNPEP1        | 3,3865839    | 3,417357537  | -0,03077364 |  |
| 217759_at    | TRIM44         | 4,331018932  | 4,361834082  | -0,03081515 |  |
| 234979_at    | BCDIN3D        | 1,215326747  | 1,246149888  | -0,03082314 |  |
| 219467_at    | GIN1           | 2,022468633  | 2,053299695  | -0,03083106 |  |
| 225430_at    | GATC           | 2,436992838  | 2,467842989  | -0,03085015 |  |
| 212271_at    | MAPK1          | 3,021441862  | 3,052311115  | -0,03086925 |  |
| 34206_at     | ARAP1          | 1,758252436  | 1,789127458  | -0,03087502 |  |
| 203023_at    | NOP16          | 4,243247228  | 4,274138329  | -0,0308911  |  |
| 1555820_a_at | MKS1           | 0,627515113  | 0,658444279  | -0,03092917 |  |
| 202805_s_at  | ABCC1          | 0,627515113  | 0,658444279  | -0,03092917 |  |
| 221477_s_at  | LOC100129518 / | 0,627515113  | 0,658444279  | -0,03092917 |  |
| 209471_s_at  | FNTA           | 4,150394824  | 4,181349409  | -0,03095458 |  |
| 1558943_x_at | ZNF765         | 3,381421359  | 3,412387088  | -0,03096573 |  |
| 238668_at    | -              | 1,326951551  | 1,3579181    | -0,03096655 |  |
| 202477_s_at  | LOC100506167 / | 2,084778276  | 2,115788273  | -0,03101    |  |
| 230112_at    | 04.03.15       | 1,530951994  | 1,562009954  | -0,03105796 |  |
| 218216_x_at  | ARL6IP4        | 3,668429488  | 3,69948842   | -0,03105893 |  |
| 241357_at    | MAPK15         | -0,055687482 | -0,024572586 | -0,0311149  |  |
| 205053_at    | PRIM1          | 3,849821959  | 3,880994209  | -0,03117225 |  |
| 228990_at    | SNHG12 /// SNO | 2,52764011   | 2,558821855  | -0,03118174 |  |
| 202979_s_at  | CREBZF         | 1,789769151  | 1,820984782  | -0,03121563 |  |
| 224651_at    | CCNY           | 3,664184451  | 3,695402096  | -0,03121765 |  |
| 211052_s_at  | TBCD           | 2,427005622  | 2,458228496  | -0,03122287 |  |
| 218904_s_at  | C9orf40        | 2,47626436   | 2,507538456  | -0,0312741  |  |
| 213154_s_at  | BICD2          | 3,043834719  | 3,075135559  | -0,03130084 |  |
| 205203_at    | PLD1           | 1,523472489  | 1,55481039   | -0,0313379  |  |
| 213795_s_at  | PTPRA          | 2,139623739  | 2,170981159  | -0,03135742 |  |
| 225837_at    | C12orf32       | 3,170152481  | 3,201528602  | -0,03137612 |  |
| 1554507_at   | NAALAD2        | -3,342483913 | -3,311072652 | -0,03141126 |  |
| 1557395_at   | LOC255130      | -3,342483913 | -3,311072652 | -0,03141126 |  |
| 1562823_at   | -              | -3,342483913 | -3,311072652 | -0,03141126 |  |
| 204082_at    | PBX3           | 1,073999308  | 1,105412836  | -0,03141353 |  |
| 218072_at    | COMMD9         | 2,420979937  | 2,452428893  | -0,03144896 |  |
| 204695_at    | CDC25A         | 3,446146386  | 3,477609204  | -0,03146282 |  |
| 211404_s_at  | APLP2          | 4,181024227  | 4,212565608  | -0,03154138 |  |
| 209732_at    | CLEC2B         | 2,611163891  | 2,64270545   | -0,03154156 |  |
| 221899_at    | N4BP2L2        | 3,102740237  | 3,134292219  | -0,03155198 |  |
| 202661_at    | ITPR2          | -0,85085127  | -0,819238336 | -0,03161293 |  |
| 204731_at    | TGFB3          | -0,85085127  | -0,819238336 | -0,03161293 |  |
| 205076_s_at  | MTMR11         | -0,85085127  | -0,819238336 | -0,03161293 |  |
| 227823_at    | RGAG4          | -0,85085127  | -0,819238336 | -0,03161293 |  |
| 229365_at    | PPP1R3F        | -0,85085127  | -0,819238336 | -0,03161293 |  |



|              |                  |              |              |             |  |
|--------------|------------------|--------------|--------------|-------------|--|
| 236200_at    | FAF1             | -0,85085127  | -0,819238336 | -0,03161293 |  |
| 237084_at    | -                | -0,85085127  | -0,819238336 | -0,03161293 |  |
| 241282_at    | -                | -0,85085127  | -0,819238336 | -0,03161293 |  |
| 243567_at    | -                | -0,85085127  | -0,819238336 | -0,03161293 |  |
| 233328_x_at  | SLC17A9          | 0,928678725  | 0,960386719  | -0,03170799 |  |
| 211214_s_at  | DAPK1            | 0,606430281  | 0,638150376  | -0,03172009 |  |
| 236988_x_at  | ITGB2            | 0,606430281  | 0,638150376  | -0,03172009 |  |
| 204950_at    | CARD8            | 2,605861638  | 2,637603218  | -0,03174158 |  |
| 222781_s_at  | C9orf40          | 3,890364806  | 3,922140371  | -0,03177557 |  |
| 227586_at    | TMEM170A         | 2,852640442  | 2,884425449  | -0,03178501 |  |
| 222609_s_at  | EXOSC1           | 4,276442889  | 4,308254202  | -0,03181131 |  |
| 210927_x_at  | JTB              | 5,694614819  | 5,726507913  | -0,03189309 |  |
| 210406_s_at  | RAB6A /// RAB6C  | 4,544218297  | 4,576117222  | -0,03189893 |  |
| 1555628_a_at | HAVCR2           | -0,078265071 | -0,046302147 | -0,03196292 |  |
| 201578_at    | PODXL            | -0,078265071 | -0,046302147 | -0,03196292 |  |
| 227889_at    | LPCAT2           | -0,078265071 | -0,046302147 | -0,03196292 |  |
| 230133_at    | RC3H2            | -0,078265071 | -0,046302147 | -0,03196292 |  |
| 232990_at    | FAM104B /// LOC  | -0,078265071 | -0,046302147 | -0,03196292 |  |
| 224861_at    | GNAQ             | 2,553576109  | 2,585563171  | -0,03198706 |  |
| 201672_s_at  | USP14            | 5,374079142  | 5,406069533  | -0,03199039 |  |
| 224741_x_at  | GAS5 /// SNORD   | 6,830307584  | 6,862351346  | -0,03204376 |  |
| 228418_at    | EXOC5            | 2,726400382  | 2,758473378  | -0,032073   |  |
| 202503_s_at  | KIAA0101         | 6,646280453  | 6,678431268  | -0,03215081 |  |
| 226066_at    | MITF             | 3,149650293  | 3,181801492  | -0,0321512  |  |
| 205061_s_at  | EXOSC9           | 3,32230241   | 3,354479478  | -0,03217707 |  |
| 226780_s_at  | C7orf55          | 4,252325187  | 4,284512471  | -0,03218728 |  |
| 206905_s_at  | MATN1            | 0,401366113  | 0,433557298  | -0,03219119 |  |
| 207078_at    | MED6             | 0,401366113  | 0,433557298  | -0,03219119 |  |
| 209445_x_at  | COA1             | 3,266269388  | 3,298466943  | -0,03219756 |  |
| 218453_s_at  | TMEM242          | 1,593009234  | 1,6252386    | -0,03222937 |  |
| 218984_at    | PUS7             | 3,932625742  | 3,964864009  | -0,03223827 |  |
| 226107_at    | C1GALT1          | 0,592200562  | 0,624460759  | -0,0322602  |  |
| 232154_at    | C19orf76         | 0,592200562  | 0,624460759  | -0,0322602  |  |
| 212144_at    | SUN2             | 1,292162421  | 1,324440845  | -0,03227842 |  |
| 212429_s_at  | GTF3C2           | 3,839317436  | 3,871608557  | -0,03229112 |  |
| 218189_s_at  | NANS             | 4,554805162  | 4,58718675   | -0,03238159 |  |
| 214100_x_at  | NSUN5P1          | 2,446911392  | 2,479296438  | -0,03238505 |  |
| 204404_at    | SLC12A2          | 1,67631007   | 1,708698295  | -0,03238822 |  |
| 229238_at    | C17orf97         | 1,04816921   | 1,080561626  | -0,03239242 |  |
| 230701_x_at  | KIF9             | 2,232003119  | 2,264418116  | -0,032415   |  |
| 1553219_a_at | AMMECR1          | 3,013454777  | 3,045906378  | -0,0324516  |  |
| 201808_s_at  | ENG              | 0,171847695  | 0,204310755  | -0,03246306 |  |
| 202274_at    | ACTG2            | 0,171847695  | 0,204310755  | -0,03246306 |  |
| 205448_s_at  | MAP3K12          | 0,171847695  | 0,204310755  | -0,03246306 |  |
| 212091_s_at  | COL6A1           | 0,171847695  | 0,204310755  | -0,03246306 |  |
| 213863_s_at  | OAZ3             | 0,171847695  | 0,204310755  | -0,03246306 |  |
| 214099_s_at  | LOC728802 /// PI | 0,171847695  | 0,204310755  | -0,03246306 |  |
| 223359_s_at  | PDE7A            | 0,171847695  | 0,204310755  | -0,03246306 |  |
| 224633_s_at  | GPATCH4          | 0,171847695  | 0,204310755  | -0,03246306 |  |
| 226604_at    | TMTC3            | 0,171847695  | 0,204310755  | -0,03246306 |  |
| 232147_at    | SLX4             | 1,283332461  | 1,315948728  | -0,03261627 |  |
| 1552497_a_at | SLAMF6           | -0,423248115 | -0,39061235  | -0,03263577 |  |
| 1553893_at   | CCDC105          | -0,423248115 | -0,39061235  | -0,03263577 |  |
| 1554312_at   | RNF170           | -0,423248115 | -0,39061235  | -0,03263577 |  |
| 206652_at    | ZMYM5            | -0,423248115 | -0,39061235  | -0,03263577 |  |
| 227592_at    | ALDH16A1         | 2,281618189  | 2,314300277  | -0,03268209 |  |

|              |                   |              |              |             |  |
|--------------|-------------------|--------------|--------------|-------------|--|
| 32209_at     | FAM89B            | 2,309066562  | 2,341749893  | -0,03268333 |  |
| 210735_s_at  | CA12              | -0,888496123 | -0,855751026 | -0,0327451  |  |
| 227950_at    | UBE2H             | -0,888496123 | -0,855751026 | -0,0327451  |  |
| 232564_at    | SLC9A5            | -0,888496123 | -0,855751026 | -0,0327451  |  |
| 232688_at    | BMP2K             | -0,888496123 | -0,855751026 | -0,0327451  |  |
| 235485_at    | WDR44             | -0,888496123 | -0,855751026 | -0,0327451  |  |
| 236486_at    | -                 | -0,888496123 | -0,855751026 | -0,0327451  |  |
| 237173_at    | LOC728855 /// LOC | -0,888496123 | -0,855751026 | -0,0327451  |  |
| 219929_s_at  | ZFYVE21           | 2,038300149  | 2,071071048  | -0,0327709  |  |
| 201313_at    | ENO2              | 1,485482016  | 1,518263577  | -0,03278156 |  |
| 1558686_at   | -                 | 0,900083947  | 0,932882274  | -0,03279833 |  |
| 218211_s_at  | MLPH              | 0,900083947  | 0,932882274  | -0,03279833 |  |
| 220368_s_at  | SMEK1             | 3,101484927  | 3,134292219  | -0,03280729 |  |
| 201353_s_at  | BAZ2A             | 0,384950573  | 0,417770464  | -0,03281989 |  |
| 212503_s_at  | DIP2C             | 0,384950573  | 0,417770464  | -0,03281989 |  |
| 202365_at    | UNC119B           | 2,220484971  | 2,253342112  | -0,03285714 |  |
| 227449_at    | EPHA4             | 1,897847661  | 1,930732138  | -0,03288448 |  |
| 239142_at    | RFESD             | 3,098971025  | 3,131875186  | -0,03290416 |  |
| 223542_at    | ANKRD32           | 3,067171967  | 3,100079607  | -0,03290764 |  |
| 225568_at    | TMEM141           | 1,575032557  | 1,60795124   | -0,03291868 |  |
| 219185_at    | SIRT5             | 1,965648824  | 1,998633167  | -0,03298434 |  |
| 218368_s_at  | TNFRSF12A         | 3,25953187   | 3,292527802  | -0,03299593 |  |
| 217819_at    | GOLGA7            | 5,337625064  | 5,37063173   | -0,03300667 |  |
| 204720_s_at  | DNAJC6            | 5,058684228  | 5,091764704  | -0,03308048 |  |
| 230936_at    | DNAJB13           | 0,57058931   | 0,603679647  | -0,03309034 |  |
| 201288_at    | ARHGDIB           | 4,311608545  | 4,344716207  | -0,03310766 |  |
| 201002_s_at  | TMEM189 /// TMEM  | 5,601779753  | 5,634956531  | -0,03317678 |  |
| 200987_x_at  | PSME3             | 3,091402928  | 3,124599694  | -0,03319677 |  |
| 200738_s_at  | LOC100652805 /    | 6,836545755  | 6,869758876  | -0,03321312 |  |
| 202263_at    | CYB5R1            | 1,473887017  | 1,507116528  | -0,03322951 |  |
| 226168_at    | ZFAND2B           | 1,473887017  | 1,507116528  | -0,03322951 |  |
| 202450_s_at  | CTSK              | -0,112808516 | -0,079522948 | -0,03328557 |  |
| 203056_s_at  | PRDM2             | -0,112808516 | -0,079522948 | -0,03328557 |  |
| 215883_at    | CTNNA1            | -0,112808516 | -0,079522948 | -0,03328557 |  |
| 216206_x_at  | MAP2K7            | -0,112808516 | -0,079522948 | -0,03328557 |  |
| 243_g_at     | MAP4              | 2,974900309  | 3,008187519  | -0,03328721 |  |
| 201517_at    | NCBP2             | 3,148435161  | 3,181801492  | -0,03336633 |  |
| 206373_at    | ZIC1              | 1,732533761  | 1,765933685  | -0,03339992 |  |
| 211034_s_at  | C12orf51          | 1,732533761  | 1,765933685  | -0,03339992 |  |
| 213889_at    | PIGL              | 1,732533761  | 1,765933685  | -0,03339992 |  |
| 203432_at    | TMPO              | 3,84757742   | 3,880994209  | -0,03341679 |  |
| 1555764_s_at | TIMM10            | 5,219930892  | 5,253365418  | -0,03343453 |  |
| 209094_at    | DDAH1             | 4,161279609  | 4,194727861  | -0,03344825 |  |
| 206662_at    | GLRX              | 5,254649665  | 5,288105861  | -0,0334562  |  |
| 206782_s_at  | DNAJC4            | 1,261018186  | 1,294497133  | -0,03347895 |  |
| 211123_at    | SLC5A5            | 1,261018186  | 1,294497133  | -0,03347895 |  |
| 212337_at    | TUG1              | 3,689469311  | 3,722963534  | -0,03349422 |  |
| 222581_at    | XPR1              | 4,547909503  | 4,581441196  | -0,03353169 |  |
| 203080_s_at  | BAZ2B             | 1,46610492   | 1,499637023  | -0,0335321  |  |
| 235196_at    | CDC73             | 1,46610492   | 1,499637023  | -0,0335321  |  |
| 222819_at    | CTPS2             | 2,082235068  | 2,115788273  | -0,0335532  |  |
| 226391_at    | -                 | 2,365585359  | 2,39915583   | -0,03357047 |  |
| 207628_s_at  | WBSCR22           | 4,172082885  | 4,205686812  | -0,03360393 |  |
| 209944_at    | ZNF410            | 4,887900851  | 4,921519966  | -0,03361912 |  |
| 37892_at     | COL11A1           | 3,07997582   | 3,113617197  | -0,03364138 |  |
| 204073_s_at  | C11orf9           | 0,555999837  | 0,589657387  | -0,03365755 |  |

|              |                 |              |              |             |  |
|--------------|-----------------|--------------|--------------|-------------|--|
| 227709_at    | TPT1-AS1        | 0,555999837  | 0,589657387  | -0,03365755 |  |
| 213893_x_at  | LOC100132832 /  | 3,014789032  | 3,048471686  | -0,03368265 |  |
| 1568377_x_at | DEFB124         | 1,64218396   | 1,675891488  | -0,03370753 |  |
| 209935_at    | ATP2C1          | 1,64218396   | 1,675891488  | -0,03370753 |  |
| 59625_at     | NOL3            | -0,12450708  | -0,090767577 | -0,0337395  |  |
| 214264_s_at  | EFCAB11         | 3,410096504  | 3,443906002  | -0,0338095  |  |
| 212121_at    | TCTN3           | 3,908423345  | 3,942281595  | -0,03385825 |  |
| 229572_at    | ATP6V0A2        | 2,87191078   | 2,905803877  | -0,0338931  |  |
| 208675_s_at  | DDOST           | 5,450264243  | 5,484180301  | -0,03391606 |  |
| 213671_s_at  | MARS            | 4,777867415  | 4,811797157  | -0,03392974 |  |
| 206900_x_at  | ZNF253          | 0,87091093   | 0,904843258  | -0,03393233 |  |
| 211019_s_at  | LSS             | 0,87091093   | 0,904843258  | -0,03393233 |  |
| 229705_at    | PIK3C3          | 0,87091093   | 0,904843258  | -0,03393233 |  |
| 239033_at    | -               | 0,87091093   | 0,904843258  | -0,03393233 |  |
| 241472_at    | -               | 0,87091093   | 0,904843258  | -0,03393233 |  |
| 208825_x_at  | RPL23A /// SNOF | 8,187560736  | 8,221523012  | -0,03396228 |  |
| 226251_at    | ASXL2           | 2,59162628   | 2,625627364  | -0,03400108 |  |
| 235907_at    | TMEM33          | 2,501229299  | 2,53523821   | -0,03400891 |  |
| 200836_s_at  | MAP4            | 1,247462054  | 1,281471383  | -0,03400933 |  |
| 231882_at    | FLJ39632        | 1,716223609  | 1,750261389  | -0,03403778 |  |
| 201623_s_at  | DARS            | 5,231596898  | 5,26568197   | -0,03408507 |  |
| 204286_s_at  | PMAIP1          | 4,510092468  | 4,544208565  | -0,0341161  |  |
| 214694_at    | MPRIP           | -0,136301282 | -0,102100538 | -0,03420074 |  |
| 224190_x_at  | NOD1            | -0,136301282 | -0,102100538 | -0,03420074 |  |
| 232583_at    | -               | -0,136301282 | -0,102100538 | -0,03420074 |  |
| 239524_at    | TSSK6           | -0,136301282 | -0,102100538 | -0,03420074 |  |
| 240806_at    | RPL15           | -0,136301282 | -0,102100538 | -0,03420074 |  |
| 225884_s_at  | GZF1            | 2,586251598  | 2,620464265  | -0,03421267 |  |
| 209340_at    | UAP1            | 4,740452408  | 4,77470758   | -0,03425517 |  |
| 218710_at    | TTC27           | 3,373122675  | 3,407399455  | -0,03427678 |  |
| 212959_s_at  | GNPTAB          | 3,729838025  | 3,76412346   | -0,03428543 |  |
| 208101_s_at  | URM1            | 1,932146506  | 1,966439221  | -0,03429272 |  |
| 238762_at    | MTHFD2L         | 3,562021138  | 3,596320795  | -0,03429966 |  |
| 221691_x_at  | NPM1            | 7,249323291  | 7,28366785   | -0,03434456 |  |
| 207699_at    | ZFH2            | 0,123193849  | 0,157549243  | -0,03435539 |  |
| 225854_x_at  | IRF2BP2         | 0,123193849  | 0,157549243  | -0,03435539 |  |
| 233775_x_at  | LOC100289333    | 2,963199262  | 2,997606395  | -0,03440713 |  |
| 1565819_at   | -               | -3,212234735 | -3,177802286 | -0,03443245 |  |
| 215117_at    | RAG2            | -3,212234735 | -3,177802286 | -0,03443245 |  |
| 216050_at    | -               | -3,212234735 | -3,177802286 | -0,03443245 |  |
| 216466_at    | NAV3            | -3,212234735 | -3,177802286 | -0,03443245 |  |
| 209323_at    | PRKRIR          | 4,368551674  | 4,403009191  | -0,03445752 |  |
| 202880_s_at  | CYTH1           | 0,995078803  | 1,029536893  | -0,03445809 |  |
| 212500_at    | ADO             | 0,995078803  | 1,029536893  | -0,03445809 |  |
| 38766_at     | LOC100862671 /  | 0,782812037  | 0,817300337  | -0,0344883  |  |
| 204139_x_at  | MZF1            | 1,119359127  | 1,153866761  | -0,03450763 |  |
| 203018_s_at  | SSX2IP          | 2,621710292  | 2,656223838  | -0,03451355 |  |
| 1562264_at   | LOC339685       | -0,946847173 | -0,912331589 | -0,03451558 |  |
| 1570140_at   | ANXA8 /// ANXA8 | -0,946847173 | -0,912331589 | -0,03451558 |  |
| 201332_s_at  | STAT6           | -0,946847173 | -0,912331589 | -0,03451558 |  |
| 210944_s_at  | CAPN3           | -0,946847173 | -0,912331589 | -0,03451558 |  |
| 211471_s_at  | RAB36           | -0,946847173 | -0,912331589 | -0,03451558 |  |
| 215318_at    | MINOS1P1        | -0,946847173 | -0,912331589 | -0,03451558 |  |
| 217240_at    | LOC100653194 /  | -0,946847173 | -0,912331589 | -0,03451558 |  |
| 229104_s_at  | GPR39           | -0,946847173 | -0,912331589 | -0,03451558 |  |
| 232321_at    | MUC17           | -0,946847173 | -0,912331589 | -0,03451558 |  |

|              |                  |              |              |             |  |
|--------------|------------------|--------------|--------------|-------------|--|
| 232464_at    | TRIM78P          | -0,946847173 | -0,912331589 | -0,03451558 |  |
| 234520_at    | -                | -0,946847173 | -0,912331589 | -0,03451558 |  |
| 239961_at    | -                | -0,946847173 | -0,912331589 | -0,03451558 |  |
| 240875_at    | CTC1             | -0,946847173 | -0,912331589 | -0,03451558 |  |
| 243498_at    | -                | -0,946847173 | -0,912331589 | -0,03451558 |  |
| 222691_at    | SLC35B3          | 2,960432227  | 2,994948944  | -0,03451672 |  |
| 201962_s_at  | RNF41            | 0,533835206  | 0,568365095  | -0,03452989 |  |
| 202575_at    | CRABP2           | 0,533835206  | 0,568365095  | -0,03452989 |  |
| 218535_s_at  | RIOK2            | 3,51093129   | 3,545468469  | -0,03453718 |  |
| 222385_x_at  | SEC61A1          | 2,577249059  | 2,611817827  | -0,03456877 |  |
| 210094_s_at  | PARD3            | 1,923647937  | 1,958277216  | -0,03462928 |  |
| 1553118_at   | THEM4            | 2,173470163  | 2,208167653  | -0,03469749 |  |
| 225545_at    | EEF2K            | 2,987866617  | 3,022611001  | -0,03474438 |  |
| 218140_x_at  | SRPRB            | 4,572581135  | 4,607335387  | -0,03475425 |  |
| 225300_at    | C15orf23         | 2,849652795  | 2,884425449  | -0,03477265 |  |
| 220180_at    | CCDC68           | 1,434549838  | 1,469325098  | -0,03477526 |  |
| 200700_s_at  | KDEL2            | 5,050901237  | 5,085689237  | -0,034788   |  |
| 225562_at    | RASA3            | 1,614289682  | 1,64909809   | -0,03480841 |  |
| 202145_at    | LY6E             | 3,571118904  | 3,605931378  | -0,03481247 |  |
| 203182_s_at  | SRPK2            | 3,170152481  | 3,204982027  | -0,03482955 |  |
| 202446_s_at  | PLSCR1           | 5,352079921  | 5,386939953  | -0,03486003 |  |
| 202132_at    | WWTR1            | 1,224581536  | 1,259496994  | -0,03491546 |  |
| 213178_s_at  | MAPK8IP3         | 1,224581536  | 1,259496994  | -0,03491546 |  |
| 217782_s_at  | GPS1             | 2,568189989  | 2,603119255  | -0,03492927 |  |
| 225791_at    | UBE2F            | 1,426552034  | 1,461646549  | -0,03509452 |  |
| 202522_at    | PITPNB           | 5,326788794  | 5,361892418  | -0,03510362 |  |
| 216180_s_at  | SYNJ2            | 0,841135803  | 0,876248481  | -0,03511268 |  |
| 227574_at    | OBSL1            | 0,841135803  | 0,876248481  | -0,03511268 |  |
| 211464_x_at  | CASP6            | 3,161745659  | 3,196911138  | -0,03516548 |  |
| 204274_at    | EBAG9            | 5,06449404   | 5,099671136  | -0,0351771  |  |
| 221489_s_at  | SPRY4            | 1,90937145   | 1,944570415  | -0,03519897 |  |
| 224765_at    | MSL1             | 4,006916639  | 4,042195463  | -0,03527882 |  |
| 206169_x_at  | ZC3H7B           | 1,683039483  | 1,718396606  | -0,03535712 |  |
| 211619_s_at  | ALPP /// ALPPL2  | -0,496991414 | -0,461594427 | -0,03539699 |  |
| 220167_s_at  | LOC729264 /// T  | -0,496991414 | -0,461594427 | -0,03539699 |  |
| 232186_at    | FITM2            | -0,496991414 | -0,461594427 | -0,03539699 |  |
| 238490_at    | KIAA2026         | -0,496991414 | -0,461594427 | -0,03539699 |  |
| 241881_at    | TRIM58           | -0,496991414 | -0,461594427 | -0,03539699 |  |
| 242921_at    | SGSM1            | -0,496991414 | -0,461594427 | -0,03539699 |  |
| 243724_at    | -                | -0,496991414 | -0,461594427 | -0,03539699 |  |
| 200604_s_at  | PRKAR1A          | 3,534378463  | 3,569779975  | -0,03540151 |  |
| 235964_x_at  | SAMHD1           | 3,292909151  | 3,32832922   | -0,03542007 |  |
| 226734_at    | EIF4E2 /// LOC10 | 1,210676994  | 1,246149888  | -0,03547289 |  |
| 209383_at    | DDIT3            | 2,416948786  | 2,452428893  | -0,03548011 |  |
| 201638_s_at  | CPSF1 /// MIR12  | 0,317354302  | 0,352836757  | -0,03548246 |  |
| 240517_at    | CBS              | 0,317354302  | 0,352836757  | -0,03548246 |  |
| 215313_x_at  | HLA-A            | 6,243628344  | 6,279154367  | -0,03552602 |  |
| 54037_at     | HPS4             | 1,900737249  | 1,936283387  | -0,03554614 |  |
| 209967_s_at  | CREM             | 1,829737795  | 1,865308541  | -0,03557075 |  |
| 41577_at     | PPP1R16B         | 1,792883283  | 1,828467288  | -0,035584   |  |
| 1564520_s_at | PRMT5            | 4,42584201   | 4,461446286  | -0,03560428 |  |
| 209678_s_at  | PRKCI            | 3,484209953  | 3,519816196  | -0,03560624 |  |
| 200841_s_at  | EPRS             | 2,030406107  | 2,066015817  | -0,03560971 |  |
| 207506_at    | GLRX3            | -0,172274514 | -0,136643983 | -0,03563053 |  |
| 217378_x_at  | LOC100130100     | -0,172274514 | -0,136643983 | -0,03563053 |  |
| 229948_at    | -                | -0,172274514 | -0,136643983 | -0,03563053 |  |

|              |               |              |              |             |  |
|--------------|---------------|--------------|--------------|-------------|--|
| 244647_at    | -             | -0,172274514 | -0,136643983 | -0,03563053 |  |
| 1557261_at   | WHAMMP2 /// W | -0,986356909 | -0,950686014 | -0,03567089 |  |
| 1561041_at   | TNRC6C        | -0,986356909 | -0,950686014 | -0,03567089 |  |
| 1569462_x_at | KCNT1         | -0,986356909 | -0,950686014 | -0,03567089 |  |
| 208400_at    | GLP1R         | -0,986356909 | -0,950686014 | -0,03567089 |  |
| 210085_s_at  | ANXA9         | -0,986356909 | -0,950686014 | -0,03567089 |  |
| 216821_at    | -             | -0,986356909 | -0,950686014 | -0,03567089 |  |
| 228396_at    | PRKG1         | -0,986356909 | -0,950686014 | -0,03567089 |  |
| 230154_at    | WAC           | -0,986356909 | -0,950686014 | -0,03567089 |  |
| 243042_at    | FAM73A        | -0,986356909 | -0,950686014 | -0,03567089 |  |
| 244707_at    | -             | -0,986356909 | -0,950686014 | -0,03567089 |  |
| 210907_s_at  | PDCD10        | 6,072801066  | 6,10849153   | -0,03569046 |  |
| 225183_at    | C16orf72      | 3,526916747  | 3,562619178  | -0,03570243 |  |
| 212888_at    | DICER1        | 4,361752105  | 4,397485991  | -0,03573389 |  |
| 203414_at    | MMD           | 2,146943689  | 2,182705233  | -0,03576154 |  |
| 202224_at    | CRK           | 2,632180155  | 2,667949403  | -0,03576925 |  |
| 227650_at    | HSPA14        | 2,546213279  | 2,582026171  | -0,03581289 |  |
| 208454_s_at  | CPQ           | 1,823660386  | 1,859476797  | -0,03581641 |  |
| 1561286_a_at | DIP2A         | 2,201862497  | 2,237691445  | -0,03582895 |  |
| 203148_s_at  | TRIM14        | 3,086335384  | 3,122166354  | -0,03583097 |  |
| 201276_at    | RAB5B         | 2,254767157  | 2,290658654  | -0,0358915  |  |
| 201420_s_at  | WDR77         | 3,565667132  | 3,601570866  | -0,03590373 |  |
| 209282_at    | PRKD2         | 1,406361373  | 1,442269454  | -0,03590808 |  |
| 205262_at    | KCNH2         | 3,925549439  | 3,96146507   | -0,03591563 |  |
| 203252_at    | CDK2AP2       | 2,022468633  | 2,058399602  | -0,03593097 |  |
| 226005_at    | UBE2G1        | 3,304956562  | 3,340940512  | -0,03598395 |  |
| 211911_x_at  | HLA-B         | 5,605769525  | 5,64176796   | -0,03599843 |  |
| 225439_at    | NUDCD1        | 5,126286794  | 5,162298023  | -0,03601123 |  |
| 215498_s_at  | MAP2K3        | 1,666156729  | 1,702196344  | -0,03603962 |  |
| 209911_x_at  | HIST1H2BD     | 6,283334422  | 6,319406563  | -0,03607214 |  |
| 205526_s_at  | KATNA1        | 3,517535002  | 3,553617909  | -0,03608291 |  |
| 218007_s_at  | RPS27L        | 6,017883727  | 6,054001037  | -0,03611731 |  |
| 1556773_at   | -             | 1,079110292  | 1,115234684  | -0,03612439 |  |
| 200974_at    | ACTA2         | 1,079110292  | 1,115234684  | -0,03612439 |  |
| 204946_s_at  | TOP3A         | 1,079110292  | 1,115234684  | -0,03612439 |  |
| 226217_at    | SLC30A7       | 2,814842651  | 2,851017268  | -0,03617462 |  |
| 201736_s_at  | 06.03.15      | 3,901227032  | 3,937445604  | -0,03621857 |  |
| 219634_at    | CHST11        | 2,396622324  | 2,432926755  | -0,03630443 |  |
| 217480_x_at  | LOC100287723  | 0,810733188  | 0,847075464  | -0,03634228 |  |
| 224659_at    | SEPN1         | 0,810733188  | 0,847075464  | -0,03634228 |  |
| 212766_s_at  | ISG20L2       | 3,51093129   | 3,547283438  | -0,03635215 |  |
| 1557536_at   | WNK2          | 0,072842263  | 0,109221392  | -0,03637913 |  |
| 225214_at    | LOC100129034  | 0,072842263  | 0,109221392  | -0,03637913 |  |
| 231929_at    | IKZF2         | 0,072842263  | 0,109221392  | -0,03637913 |  |
| 240468_at    | -             | 2,294858597  | 2,331254065  | -0,03639547 |  |
| 206958_s_at  | UPF3A         | 2,807162789  | 2,843651104  | -0,03648831 |  |
| 200701_at    | NPC2          | 4,806268808  | 4,842793743  | -0,03652494 |  |
| 38158_at     | ESPL1         | 2,612045708  | 2,648635337  | -0,03658963 |  |
| 208901_s_at  | TOP1          | 6,203676216  | 6,240273462  | -0,03659725 |  |
| 215682_at    | LOC440792     | -0,196756757 | -0,160136748 | -0,03662001 |  |
| 221687_s_at  | FAM125B       | -0,196756757 | -0,160136748 | -0,03662001 |  |
| 232352_at    | ISL2          | -0,196756757 | -0,160136748 | -0,03662001 |  |
| 202854_at    | HPRT1         | 5,695655083  | 5,732303262  | -0,03664818 |  |
| 201749_at    | ECE1          | 2,288253583  | 2,324919719  | -0,03666614 |  |
| 210084_x_at  | TPSAB1        | 0,480753764  | 0,51742585   | -0,03667209 |  |
| 215424_s_at  | SNW1          | 4,034147209  | 4,070868415  | -0,03672121 |  |

|              |                   |              |              |             |  |
|--------------|-------------------|--------------|--------------|-------------|--|
| 65133_i_at   | INO80B /// INO80C | -0,936037532 | -0,899312831 | -0,0367247  |  |
| 235411_at    | PGBD1             | 1,649074067  | 1,685812099  | -0,03673803 |  |
| 208708_x_at  | EIF5              | 6,06557696   | 6,102331931  | -0,03675497 |  |
| 238025_at    | MLKL              | 1,177702228  | 1,214517879  | -0,03681565 |  |
| 211015_s_at  | HSPA4             | 5,076682901  | 5,113518829  | -0,03683593 |  |
| 227538_at    | MED26             | 5,169457412  | 5,206326278  | -0,03686887 |  |
| 209090_s_at  | SH3GLB1           | 3,453052675  | 3,489929688  | -0,03687701 |  |
| 35160_at     | LDB1              | 2,664842176  | 2,701750316  | -0,03690814 |  |
| 223950_s_at  | FLYWCH1           | 1,381753566  | 1,418668082  | -0,03691452 |  |
| 203836_s_at  | MAP3K5            | 2,644299732  | 2,681234383  | -0,03693465 |  |
| 200741_s_at  | RPS27             | 7,591738832  | 7,628684993  | -0,03694616 |  |
| 1554093_a_at | SNAPC5            | 2,516380342  | 2,553413592  | -0,03703325 |  |
| 212878_s_at  | KLC1              | 3,401961598  | 3,439026336  | -0,03706474 |  |
| 217946_s_at  | SAE1              | 4,827683398  | 4,864793325  | -0,03710993 |  |
| 218672_at    | SCNM1 /// TNFA    | 3,556534813  | 3,593688577  | -0,03715376 |  |
| 228415_at    | AP1S2             | 6,066944287  | 6,104105511  | -0,03716122 |  |
| 1558381_a_at | LOC100506469      | 1,05337236   | 1,090553537  | -0,03718118 |  |
| 204056_s_at  | MVK               | 1,05337236   | 1,090553537  | -0,03718118 |  |
| 213129_s_at  | GCSH              | 5,045689152  | 5,082876522  | -0,03718737 |  |
| 1558641_at   | SPATA24           | 2,825526235  | 2,862725455  | -0,03719922 |  |
| 229533_x_at  | ZNF680            | 2,825526235  | 2,862725455  | -0,03719922 |  |
| 201904_s_at  | CTDSPL            | 1,789769151  | 1,826973888  | -0,03720474 |  |
| 1552626_a_at | TMEM163           | 3,167755526  | 3,204982027  | -0,0372265  |  |
| 223015_at    | EIF2A             | 4,596392426  | 4,63362748   | -0,03723505 |  |
| 224665_at    | ANAPC16           | 3,733084098  | 3,770352811  | -0,03726871 |  |
| 243037_at    | -                 | 0,273439642  | 0,310717132  | -0,03727749 |  |
| 218987_at    | ATF7IP            | 2,371846398  | 2,409170778  | -0,03732438 |  |
| 218588_s_at  | FAM114A2          | 1,163336153  | 1,200746069  | -0,03740992 |  |
| 218727_at    | SLC38A7           | 1,163336153  | 1,200746069  | -0,03740992 |  |
| 205581_s_at  | NOS3              | 1,462198073  | 1,499637023  | -0,03743895 |  |
| 1562078_at   | -                 | -1,047650486 | -1,010192375 | -0,03745811 |  |
| 1565347_s_at | TFE3              | -1,047650486 | -1,010192375 | -0,03745811 |  |
| 1565728_at   | LOC284630         | -1,047650486 | -1,010192375 | -0,03745811 |  |
| 216117_at    | EXOSC2            | -1,047650486 | -1,010192375 | -0,03745811 |  |
| 216794_at    | -                 | -1,047650486 | -1,010192375 | -0,03745811 |  |
| 220657_at    | KLHL11            | -1,047650486 | -1,010192375 | -0,03745811 |  |
| 223990_at    | C4orf17           | -1,047650486 | -1,010192375 | -0,03745811 |  |
| 227242_s_at  | EBF3              | -1,047650486 | -1,010192375 | -0,03745811 |  |
| 227425_at    | REPS2             | -1,047650486 | -1,010192375 | -0,03745811 |  |
| 235886_at    | LOC100505666      | -1,047650486 | -1,010192375 | -0,03745811 |  |
| 237111_at    | LOC388942         | -1,047650486 | -1,010192375 | -0,03745811 |  |
| 238909_at    | S100A10           | -1,047650486 | -1,010192375 | -0,03745811 |  |
| 209484_s_at  | NSL1              | 3,391728033  | 3,429217209  | -0,03748918 |  |
| 225772_s_at  | COX14             | 4,505354197  | 4,542844647  | -0,03749045 |  |
| 201758_at    | TSG101            | 4,331018932  | 4,368522113  | -0,03750318 |  |
| 1553129_at   | SVEP1             | -3,07502285  | -3,037500868 | -0,03752198 |  |
| 1555391_a_at | ALS2CR8           | -3,07502285  | -3,037500868 | -0,03752198 |  |
| 1555498_at   | -                 | -3,07502285  | -3,037500868 | -0,03752198 |  |
| 1557366_at   | CCDC144A /// CC   | -3,07502285  | -3,037500868 | -0,03752198 |  |
| 1558107_at   | LOC283788         | -3,07502285  | -3,037500868 | -0,03752198 |  |
| 1559287_at   | -                 | -3,07502285  | -3,037500868 | -0,03752198 |  |
| 1560996_at   | -                 | -3,07502285  | -3,037500868 | -0,03752198 |  |
| 1562596_at   | -                 | -3,07502285  | -3,037500868 | -0,03752198 |  |
| 1562820_at   | -                 | -3,07502285  | -3,037500868 | -0,03752198 |  |
| 1563254_a_at | LOC100506733      | -3,07502285  | -3,037500868 | -0,03752198 |  |
| 1563329_s_at | -                 | -3,07502285  | -3,037500868 | -0,03752198 |  |

|              |                  |              |              |             |  |
|--------------|------------------|--------------|--------------|-------------|--|
| 1569021_at   | PIK3C2A          | -3,07502285  | -3,037500868 | -0,03752198 |  |
| 1569948_at   | -                | -3,07502285  | -3,037500868 | -0,03752198 |  |
| 208508_s_at  | OR2J2            | -3,07502285  | -3,037500868 | -0,03752198 |  |
| 211227_s_at  | PCDH11X /// PC   | -3,07502285  | -3,037500868 | -0,03752198 |  |
| 215929_at    | LOC100507605     | -3,07502285  | -3,037500868 | -0,03752198 |  |
| 215957_at    | UBE2D1           | -3,07502285  | -3,037500868 | -0,03752198 |  |
| 217698_at    | -                | -3,07502285  | -3,037500868 | -0,03752198 |  |
| 227235_at    | GUCY1A3          | -3,07502285  | -3,037500868 | -0,03752198 |  |
| 232049_at    | -                | -3,07502285  | -3,037500868 | -0,03752198 |  |
| 238852_at    | PRRX1            | -3,07502285  | -3,037500868 | -0,03752198 |  |
| 241086_at    | -                | -3,07502285  | -3,037500868 | -0,03752198 |  |
| 241975_at    | -                | -3,07502285  | -3,037500868 | -0,03752198 |  |
| 243339_at    | -                | -3,07502285  | -3,037500868 | -0,03752198 |  |
| 243968_x_at  | FCRL1            | -3,07502285  | -3,037500868 | -0,03752198 |  |
| 244845_at    | -                | -3,07502285  | -3,037500868 | -0,03752198 |  |
| 223373_s_at  | PLA2G12A         | 3,043834719  | 3,081412119  | -0,0375774  |  |
| 38691_s_at   | SFTPC            | 0,627515113  | 0,665145968  | -0,03763086 |  |
| 227942_s_at  | CRIP1            | 3,917011805  | 3,954643074  | -0,03763127 |  |
| 1569857_s_at | TPP2             | 0,457392764  | 0,495031851  | -0,03763909 |  |
| 216043_x_at  | -                | 0,457392764  | 0,495031851  | -0,03763909 |  |
| 229059_at    | FAM225A /// FAM  | 0,457392764  | 0,495031851  | -0,03763909 |  |
| 233570_at    | -                | 0,457392764  | 0,495031851  | -0,03763909 |  |
| 225821_s_at  | BOD1L1           | 2,742596529  | 2,780243895  | -0,03764737 |  |
| 213357_at    | GTF2H5           | 4,490086298  | 4,527755823  | -0,03766952 |  |
| 209743_s_at  | ITCH             | 1,542099044  | 1,579853228  | -0,03775418 |  |
| 218947_s_at  | MTPAP            | 2,701760055  | 2,739547836  | -0,03778778 |  |
| 219933_at    | GLRX2            | 4,234684448  | 4,272493466  | -0,03780902 |  |
| 200982_s_at  | ANXA6            | 1,153678675  | 1,191491281  | -0,03781261 |  |
| 229491_at    | SLC9B2           | 1,153678675  | 1,191491281  | -0,03781261 |  |
| 201863_at    | FAM32A           | 5,181091454  | 5,218906902  | -0,03781545 |  |
| 209896_s_at  | PTPN11           | 3,335176289  | 3,373018423  | -0,03784213 |  |
| 41113_at     | ZNF500           | 0,152595961  | 0,190445488  | -0,03784953 |  |
| 212388_at    | USP24            | 3,037284587  | 3,075135559  | -0,03785097 |  |
| 204757_s_at  | C2CD2L           | 0,911589958  | 0,949447784  | -0,03785783 |  |
| 208761_s_at  | SUMO1            | 5,113889166  | 5,151898085  | -0,03800892 |  |
| 209382_at    | POLR3C           | 2,355089531  | 2,39311332   | -0,03802379 |  |
| 227868_at    | LOC154761        | 0,255492549  | 0,293518836  | -0,03802629 |  |
| 239393_at    | -                | 0,255492549  | 0,293518836  | -0,03802629 |  |
| 202264_s_at  | TOMM40           | 4,492003645  | 4,530052177  | -0,03804853 |  |
| 223989_s_at  | REXO2            | 2,491678455  | 2,529740643  | -0,03806219 |  |
| 212767_at    | MTG1             | 2,693452197  | 2,731588328  | -0,03813613 |  |
| 222505_at    | LMBR1            | 2,693452197  | 2,731588328  | -0,03813613 |  |
| 222982_x_at  | SLC38A2          | 7,428258698  | 7,466405743  | -0,03814704 |  |
| 223849_s_at  | MOV10            | 0,767063567  | 0,805216064  | -0,0381525  |  |
| 1554542_at   | SLC25A48         | -0,234278768 | -0,19610998  | -0,03816879 |  |
| 204519_s_at  | PLLP             | -0,234278768 | -0,19610998  | -0,03816879 |  |
| 208046_at    | HIST1H4A /// HIS | -0,234278768 | -0,19610998  | -0,03816879 |  |
| 220134_x_at  | FAM176B          | -0,234278768 | -0,19610998  | -0,03816879 |  |
| 226647_at    | TMEM25           | -0,234278768 | -0,19610998  | -0,03816879 |  |
| 229849_at    | WIPF3            | -0,234278768 | -0,19610998  | -0,03816879 |  |
| 235974_at    | EXOC4            | -0,234278768 | -0,19610998  | -0,03816879 |  |
| 241800_x_at  | -                | -0,234278768 | -0,19610998  | -0,03816879 |  |
| 201338_x_at  | GTF3A            | 5,804770592  | 5,843020258  | -0,03824967 |  |
| 223039_at    | C22orf13         | 3,115233629  | 3,153484076  | -0,03825045 |  |
| 225713_at    | STK11IP          | 1,027166904  | 1,065442793  | -0,03827589 |  |
| 226639_at    | SFT2D3           | 1,027166904  | 1,065442793  | -0,03827589 |  |

|              |                   |              |              |             |  |
|--------------|-------------------|--------------|--------------|-------------|--|
| 226789_at    | EMB               | 1,027166904  | 1,065442793  | -0,03827589 |  |
| 235200_at    | ZNF561            | 1,027166904  | 1,065442793  | -0,03827589 |  |
| 239586_at    | FAM83A            | 1,027166904  | 1,065442793  | -0,03827589 |  |
| 210225_x_at  | LILRA6 /// LILRB3 | 0,44160593   | 0,479907041  | -0,03830111 |  |
| 240282_at    | WDR1              | 0,44160593   | 0,479907041  | -0,03830111 |  |
| 217836_s_at  | YY1AP1            | 3,798842702  | 3,837157105  | -0,0383144  |  |
| 1561153_at   | -                 | -0,57445847  | -0,536087151 | -0,03837132 |  |
| 202881_x_at  | -                 | -0,57445847  | -0,536087151 | -0,03837132 |  |
| 211881_x_at  | IGLJ3             | -0,57445847  | -0,536087151 | -0,03837132 |  |
| 217129_at    | -                 | -0,57445847  | -0,536087151 | -0,03837132 |  |
| 224246_at    | -                 | -0,57445847  | -0,536087151 | -0,03837132 |  |
| 235946_at    | RIBC1             | -0,57445847  | -0,536087151 | -0,03837132 |  |
| 236136_at    | CYTH3             | -0,57445847  | -0,536087151 | -0,03837132 |  |
| 240900_at    | C7orf50           | -0,57445847  | -0,536087151 | -0,03837132 |  |
| 242150_at    | CLSPN             | -0,57445847  | -0,536087151 | -0,03837132 |  |
| 218584_at    | TCTN1             | 1,139070151  | 1,177496821  | -0,03842667 |  |
| 218004_at    | BSDC1             | 2,344516784  | 2,382985886  | -0,0384691  |  |
| 209209_s_at  | FERMT2            | 2,646022818  | 2,684536601  | -0,03851378 |  |
| 229509_at    | MFSD8             | 1,960118853  | 1,998633167  | -0,03851431 |  |
| 201639_s_at  | CPSF1 /// MIR12   | 3,811181587  | 3,849713445  | -0,03853186 |  |
| 203212_s_at  | MTMR2             | 1,523472489  | 1,562009954  | -0,03853747 |  |
| 225486_at    | ARID2             | 1,523472489  | 1,562009954  | -0,03853747 |  |
| 213981_at    | COMT              | 0,020670649  | 0,059218869  | -0,03854822 |  |
| 215261_at    | -                 | 0,020670649  | 0,059218869  | -0,03854822 |  |
| 239581_at    | ARL10             | 0,020670649  | 0,059218869  | -0,03854822 |  |
| 234660_s_at  | DIS3              | 2,683419202  | 2,721978587  | -0,03855938 |  |
| 200923_at    | LGALS3BP          | 3,049053496  | 3,087661492  | -0,038608   |  |
| 1557470_at   | SPATA13           | -1,089016378 | -1,050406615 | -0,03860976 |  |
| 201431_s_at  | DPYSL3            | -1,089016378 | -1,050406615 | -0,03860976 |  |
| 207151_at    | ADCYAP1R1         | -1,089016378 | -1,050406615 | -0,03860976 |  |
| 210328_at    | GNMT              | -1,089016378 | -1,050406615 | -0,03860976 |  |
| 211021_s_at  | RGS14             | -1,089016378 | -1,050406615 | -0,03860976 |  |
| 221327_s_at  | OPN1LW /// OPN1   | -1,089016378 | -1,050406615 | -0,03860976 |  |
| 223574_x_at  | PPP2R2C           | -1,089016378 | -1,050406615 | -0,03860976 |  |
| 229039_at    | SYN2              | -1,089016378 | -1,050406615 | -0,03860976 |  |
| 230015_at    | PRCD              | -1,089016378 | -1,050406615 | -0,03860976 |  |
| 231625_at    | SLC22A9           | -1,089016378 | -1,050406615 | -0,03860976 |  |
| 235504_at    | GREM2             | -1,089016378 | -1,050406615 | -0,03860976 |  |
| 236258_at    | C20orf151         | -1,089016378 | -1,050406615 | -0,03860976 |  |
| 239877_at    | LOC157740         | -1,089016378 | -1,050406615 | -0,03860976 |  |
| 241116_at    | -                 | -1,089016378 | -1,050406615 | -0,03860976 |  |
| 218861_at    | RNF25             | 1,603688695  | 1,642321262  | -0,03863257 |  |
| 207040_s_at  | ST13              | 5,749542191  | 5,788244042  | -0,03870185 |  |
| 219821_s_at  | GFOD1             | 4,350171631  | 4,388908328  | -0,0387367  |  |
| 204181_s_at  | ZBTB43            | 1,515954005  | 1,55481039   | -0,03885639 |  |
| 232057_at    | SLC7A6OS          | 1,233777334  | 1,272721751  | -0,03894442 |  |
| 212217_at    | PREPL             | 2,380152406  | 2,419116683  | -0,03896428 |  |
| 216221_s_at  | PUM2              | 3,852063011  | 3,891034012  | -0,038971   |  |
| 217747_s_at  | RPS9              | 7,244284425  | 7,283259516  | -0,03897509 |  |
| 212295_s_at  | SLC7A1            | 4,955812888  | 4,994842142  | -0,03902925 |  |
| 226525_at    | STK17B            | 3,691139316  | 3,730171924  | -0,03903261 |  |
| 219226_at    | CDK12             | 2,281618189  | 2,320681318  | -0,03906313 |  |
| 1558173_a_at | LUZP1             | 0,882651021  | 0,921731975  | -0,03908095 |  |
| 232706_s_at  | TRABD             | 0,882651021  | 0,921731975  | -0,03908095 |  |
| 236282_at    | LOC100505932      | 0,882651021  | 0,921731975  | -0,03908095 |  |
| 219635_at    | ZNF606            | 1,593009234  | 1,632095957  | -0,03908672 |  |



|              |                 |              |              |             |  |
|--------------|-----------------|--------------|--------------|-------------|--|
| 213361_at    | TDRD7           | 1,946200473  | 1,98530622   | -0,03910575 |  |
| 204207_s_at  | RNGTT           | 3,092667038  | 3,131875186  | -0,03920815 |  |
| 1552557_a_at | ZDHHHC15        | -0,259832361 | -0,220592223 | -0,03924014 |  |
| 1561082_at   | NID1            | -0,259832361 | -0,220592223 | -0,03924014 |  |
| 202465_at    | PCOLCE          | -0,259832361 | -0,220592223 | -0,03924014 |  |
| 204623_at    | TFF3            | -0,259832361 | -0,220592223 | -0,03924014 |  |
| 211654_x_at  | HLA-DQB1        | -0,259832361 | -0,220592223 | -0,03924014 |  |
| 221009_s_at  | ANGPTL4         | -0,259832361 | -0,220592223 | -0,03924014 |  |
| 229873_at    | KCTD21          | -0,259832361 | -0,220592223 | -0,03924014 |  |
| 240954_at    | -               | -0,259832361 | -0,220592223 | -0,03924014 |  |
| 214333_x_at  | IDH3G           | 1,81142822   | 1,85068474   | -0,03925652 |  |
| 225805_at    | HNRNPU          | 1,81142822   | 1,85068474   | -0,03925652 |  |
| 207654_x_at  | DR1             | 3,506195778  | 3,545468469  | -0,03927269 |  |
| 202134_s_at  | WWTR1           | 2,462640593  | 2,501934108  | -0,03929352 |  |
| 236313_at    | CDKN2B          | 3,877221251  | 3,916534328  | -0,03931308 |  |
| 1552892_at   | TNFRSF13C       | 0,417596971  | 0,456918297  | -0,03932133 |  |
| 202851_at    | AAGAB           | 0,417596971  | 0,456918297  | -0,03932133 |  |
| 223176_at    | KCTD20          | 2,940912947  | 2,980244813  | -0,03933187 |  |
| 225335_at    | ZNF496          | 1,940595304  | 1,979940779  | -0,03934547 |  |
| 219479_at    | KDEL1           | 1,58584542   | 1,6252386    | -0,03939318 |  |
| 208490_x_at  | HIST1H2BC /// H | 5,469610588  | 5,509072081  | -0,03946149 |  |
| 205746_s_at  | ADAM17          | 1,114389003  | 1,153866761  | -0,03947776 |  |
| 219228_at    | ZNF331          | 1,318332599  | 1,3579181    | -0,0395855  |  |
| 202916_s_at  | FAM20B          | 3,518475927  | 3,558125564  | -0,03964964 |  |
| 200813_s_at  | PAFAH1B1        | 1,868628927  | 1,908311039  | -0,03968211 |  |
| 58367_s_at   | ZNF419          | 2,675004741  | 2,71472904   | -0,0397243  |  |
| 217769_s_at  | POMP            | 6,777442885  | 6,817183247  | -0,03974036 |  |
| 209517_s_at  | ASH2L           | 5,902791466  | 5,942571032  | -0,03977957 |  |
| 225034_at    | ST3GAL1         | 0,728550685  | 0,768343791  | -0,03979311 |  |
| 224232_s_at  | PRELID1         | 3,38038663   | 3,420331607  | -0,03994498 |  |
| 223212_at    | ZDHHHC16        | 3,861734212  | 3,901713973  | -0,03997976 |  |
| 1562256_at   | NLRP1           | 0,209623097  | 0,249604176  | -0,03998108 |  |
| 204227_s_at  | TK2             | 0,209623097  | 0,249604176  | -0,03998108 |  |
| 238230_x_at  | MAN2C1          | 0,209623097  | 0,249604176  | -0,03998108 |  |
| 239331_at    | -               | 0,209623097  | 0,249604176  | -0,03998108 |  |
| 226996_at    | LCLAT1          | 4,520462208  | 4,560475791  | -0,04001358 |  |
| 217854_s_at  | POLR2E          | 5,437138102  | 5,477175788  | -0,04003769 |  |
| 227917_at    | LOC100506990    | 2,827046023  | 2,867091644  | -0,04004562 |  |
| 225750_at    | ERO1L           | 4,044635894  | 4,084681583  | -0,04004569 |  |
| 230179_at    | LOC285812       | 4,269752826  | 4,309858816  | -0,04010599 |  |
| 201055_s_at  | HNRNPA0         | 3,647078281  | 3,687194562  | -0,04011628 |  |
| 223687_s_at  | LY6K            | 2,352981171  | 2,39311332   | -0,04013215 |  |
| 35626_at     | SGSH            | 0,397279707  | 0,437477192  | -0,04019749 |  |
| 201605_x_at  | CNN2            | 2,718233611  | 2,758473378  | -0,04023977 |  |
| 215963_x_at  | RPL3            | 7,35805014   | 7,398371367  | -0,04032123 |  |
| 205107_s_at  | EFNA4           | 0,853119696  | 0,893473268  | -0,04035357 |  |
| 223746_at    | STK4            | 0,715481152  | 0,755840599  | -0,04035945 |  |
| 222749_at    | SUFU            | 1,390002893  | 1,43051703   | -0,04051414 |  |
| 215773_x_at  | PARP2           | 3,729838025  | 3,770352811  | -0,04051479 |  |
| 218210_at    | FN3KRP          | 3,117719377  | 3,158242412  | -0,04052304 |  |
| 223193_x_at  | FAM162A         | 5,80727518   | 5,847814633  | -0,04053945 |  |
| 203586_s_at  | ARL4D           | 1,089278259  | 1,129843209  | -0,04056495 |  |
| 1558121_at   | CSRNP3          | -2,930741289 | -2,89013181  | -0,04060948 |  |
| 1559862_at   | COPA            | -2,930741289 | -2,89013181  | -0,04060948 |  |
| 1561073_at   | -               | -2,930741289 | -2,89013181  | -0,04060948 |  |
| 1561511_at   | -               | -2,930741289 | -2,89013181  | -0,04060948 |  |

|             |                 |              |              |             |  |
|-------------|-----------------|--------------|--------------|-------------|--|
| 1562255_at  | SYTL3           | -2,930741289 | -2,89013181  | -0,04060948 |  |
| 1562514_at  | -               | -2,930741289 | -2,89013181  | -0,04060948 |  |
| 1564236_at  | -               | -2,930741289 | -2,89013181  | -0,04060948 |  |
| 1565742_at  | -               | -2,930741289 | -2,89013181  | -0,04060948 |  |
| 205302_at   | IGFBP1          | -2,930741289 | -2,89013181  | -0,04060948 |  |
| 207633_s_at | MUSK            | -2,930741289 | -2,89013181  | -0,04060948 |  |
| 208268_at   | ADAM28          | -2,930741289 | -2,89013181  | -0,04060948 |  |
| 208529_at   | BTF3P11         | -2,930741289 | -2,89013181  | -0,04060948 |  |
| 210303_at   | MAB21L2         | -2,930741289 | -2,89013181  | -0,04060948 |  |
| 217201_at   | RASAL2          | -2,930741289 | -2,89013181  | -0,04060948 |  |
| 234247_at   | -               | -2,930741289 | -2,89013181  | -0,04060948 |  |
| 235723_at   | BNC2            | -2,930741289 | -2,89013181  | -0,04060948 |  |
| 237974_at   | ABHD12B /// MIR | -2,930741289 | -2,89013181  | -0,04060948 |  |
| 239153_at   | HOTAIR          | -2,930741289 | -2,89013181  | -0,04060948 |  |
| 239963_at   | -               | -2,930741289 | -2,89013181  | -0,04060948 |  |
| 241103_at   | SMEK2           | -2,930741289 | -2,89013181  | -0,04060948 |  |
| 241835_at   | -               | -2,930741289 | -2,89013181  | -0,04060948 |  |
| 242202_at   | -               | -2,930741289 | -2,89013181  | -0,04060948 |  |
| 242958_x_at | -               | -2,930741289 | -2,89013181  | -0,04060948 |  |
| 243161_x_at | ZFP42           | -2,930741289 | -2,89013181  | -0,04060948 |  |
| 243204_at   | -               | -2,930741289 | -2,89013181  | -0,04060948 |  |
| 243636_s_at | -               | -2,930741289 | -2,89013181  | -0,04060948 |  |
| 227102_at   | TRIM35          | 1,556829052  | 1,59747851   | -0,04064946 |  |
| 239720_at   | ZGLP1           | 1,556829052  | 1,59747851   | -0,04064946 |  |
| 211749_s_at | VAMP3           | 3,689469311  | 3,730171924  | -0,04070261 |  |
| 226312_at   | RICTOR          | 3,893269405  | 3,933981372  | -0,04071197 |  |
| 221502_at   | KPNA3           | 3,875753437  | 3,916534328  | -0,04078089 |  |
| 200801_x_at | ACTB /// LOC100 | 7,949834569  | 7,990620709  | -0,04078614 |  |
| 222130_s_at | FTSJ2           | 2,470441349  | 2,511262629  | -0,04082128 |  |
| 224662_at   | KIF5B           | 4,562580605  | 4,603415342  | -0,04083474 |  |
| 206827_s_at | TRPV6           | -0,033456564 | 0,007421914  | -0,04087848 |  |
| 220805_at   | HRH2            | -0,033456564 | 0,007421914  | -0,04087848 |  |
| 229452_at   | TMEM88          | -0,033456564 | 0,007421914  | -0,04087848 |  |
| 236675_at   | RPA1            | -0,033456564 | 0,007421914  | -0,04087848 |  |
| 206441_s_at | COMMD4          | 4,214504741  | 4,25538582   | -0,04088108 |  |
| 206912_at   | FOXE1           | -0,299034815 | -0,258114234 | -0,04092058 |  |
| 208108_s_at | AVPR2           | -0,299034815 | -0,258114234 | -0,04092058 |  |
| 211190_x_at | CD84            | -0,299034815 | -0,258114234 | -0,04092058 |  |
| 211611_s_at | ATF6B /// TNXB  | -0,299034815 | -0,258114234 | -0,04092058 |  |
| 224449_at   | DDI2 /// RSC1A1 | -0,299034815 | -0,258114234 | -0,04092058 |  |
| 225316_at   | MFSD2A          | -0,299034815 | -0,258114234 | -0,04092058 |  |
| 230057_at   | LOC285178       | -0,299034815 | -0,258114234 | -0,04092058 |  |
| 232551_at   | SLC26A6         | -0,299034815 | -0,258114234 | -0,04092058 |  |
| 239429_at   | -               | -0,299034815 | -0,258114234 | -0,04092058 |  |
| 216565_x_at | -               | 4,28697245   | 4,327920804  | -0,04094835 |  |
| 232175_at   | ARF1            | 1,46610492   | 1,507116528  | -0,04101161 |  |
| 236004_at   | -               | 2,185368281  | 2,226407528  | -0,04103925 |  |
| 222439_s_at | THRAP3          | 2,28383338   | 2,324919719  | -0,04108634 |  |
| 229986_at   | LOC100287163 /  | 1,62481334   | 1,665902186  | -0,04108885 |  |
| 203235_at   | THOP1           | 1,283332461  | 1,324440845  | -0,04110838 |  |
| 203883_s_at | RAB11FIP2       | 1,283332461  | 1,324440845  | -0,04110838 |  |
| 202038_at   | UBE4A           | 3,945975838  | 3,987098381  | -0,04112254 |  |
| 208955_at   | DUT             | 2,661438684  | 2,702564916  | -0,04112623 |  |
| 200963_x_at | RPL31           | 7,440472973  | 7,481612691  | -0,04113972 |  |
| 224993_at   | MLLT1           | 3,304956562  | 3,346162854  | -0,04120629 |  |
| 211560_s_at | ALAS2           | 4,046594062  | 4,08780258   | -0,04120852 |  |

|              |                  |              |              |             |  |
|--------------|------------------|--------------|--------------|-------------|--|
| 219910_at    | FICD             | 0,181384709  | 0,222599095  | -0,04121439 |  |
| 218953_s_at  | PCYOX1L          | 2,503131904  | 2,544354523  | -0,04122262 |  |
| 204745_x_at  | MT1G             | 4,713590151  | 4,754817565  | -0,04122741 |  |
| 226405_s_at  | ARRDC1           | 0,695652136  | 0,73688026   | -0,04122812 |  |
| 219491_at    | LRFN4            | 1,073999308  | 1,115234684  | -0,04123538 |  |
| 227740_at    | UHMK1            | 2,799441827  | 2,840694075  | -0,04125225 |  |
| 225138_at    | ZRANB1           | 2,864529541  | 2,905803877  | -0,04127434 |  |
| 211699_x_at  | HBA1 /// HBA2    | 5,030268844  | 5,071570505  | -0,04130166 |  |
| 218119_at    | TIMM23           | 3,600740871  | 3,642048499  | -0,04130763 |  |
| 226649_at    | PANK1            | 1,69307511   | 1,73441697   | -0,04134186 |  |
| 204502_at    | SAMHD1           | 2,178241192  | 2,21959457   | -0,04135338 |  |
| 217861_s_at  | PREB             | 2,796341835  | 2,837730973  | -0,04138914 |  |
| 201740_at    | NDUFS3           | 4,893351471  | 4,934753321  | -0,04140185 |  |
| 220371_s_at  | SLC12A9          | 1,369290453  | 1,410714371  | -0,04142392 |  |
| 234465_at    | EME1             | 1,369290453  | 1,410714371  | -0,04142392 |  |
| 1570212_a_at | GNN              | -1,196375121 | -1,154897679 | -0,04147744 |  |
| 206643_at    | HAL              | -1,196375121 | -1,154897679 | -0,04147744 |  |
| 208205_at    | PCDHA9           | -1,196375121 | -1,154897679 | -0,04147744 |  |
| 208208_at    | MYH13            | -1,196375121 | -1,154897679 | -0,04147744 |  |
| 211003_x_at  | TGM2             | -1,196375121 | -1,154897679 | -0,04147744 |  |
| 211010_s_at  | NCR3             | -1,196375121 | -1,154897679 | -0,04147744 |  |
| 215123_at    | 61E3.4 /// LOC10 | -1,196375121 | -1,154897679 | -0,04147744 |  |
| 215641_at    | SEC24D           | -1,196375121 | -1,154897679 | -0,04147744 |  |
| 216357_at    | SNX1             | -1,196375121 | -1,154897679 | -0,04147744 |  |
| 220936_s_at  | H2AFJ            | -1,196375121 | -1,154897679 | -0,04147744 |  |
| 223393_s_at  | TSHZ3            | -1,196375121 | -1,154897679 | -0,04147744 |  |
| 223941_at    | FBXO24           | -1,196375121 | -1,154897679 | -0,04147744 |  |
| 226718_at    | AMIGO1           | -1,196375121 | -1,154897679 | -0,04147744 |  |
| 232446_at    | MGC45800         | -1,196375121 | -1,154897679 | -0,04147744 |  |
| 234939_s_at  | PHF12            | -1,196375121 | -1,154897679 | -0,04147744 |  |
| 242123_at    | PAQR7            | -1,196375121 | -1,154897679 | -0,04147744 |  |
| 243926_at    | -                | -1,196375121 | -1,154897679 | -0,04147744 |  |
| 213454_at    | APITD1 /// APITD | 2,652894659  | 2,694398145  | -0,04150349 |  |
| 219282_s_at  | TRPV2            | 2,410880861  | 2,452428893  | -0,04154803 |  |
| 205937_at    | CGREF1           | -0,655928373 | -0,614371577 | -0,0415568  |  |
| 206160_at    | APOBEC2          | -0,655928373 | -0,614371577 | -0,0415568  |  |
| 207669_at    | KRT83            | -0,655928373 | -0,614371577 | -0,0415568  |  |
| 214154_s_at  | PKP2             | -0,655928373 | -0,614371577 | -0,0415568  |  |
| 214320_x_at  | CYP2A6           | -0,655928373 | -0,614371577 | -0,0415568  |  |
| 216957_at    | USP22            | -0,655928373 | -0,614371577 | -0,0415568  |  |
| 217062_at    | DMPK             | -0,655928373 | -0,614371577 | -0,0415568  |  |
| 218918_at    | MAN1C1           | -0,655928373 | -0,614371577 | -0,0415568  |  |
| 219377_at    | FAM59A           | -0,655928373 | -0,614371577 | -0,0415568  |  |
| 223581_at    | ZNF577           | -0,655928373 | -0,614371577 | -0,0415568  |  |
| 225618_at    | ARHGAP27         | -0,655928373 | -0,614371577 | -0,0415568  |  |
| 230335_at    | C9orf50          | -0,655928373 | -0,614371577 | -0,0415568  |  |
| 231177_at    | HCFC1            | -0,655928373 | -0,614371577 | -0,0415568  |  |
| 240281_at    | -                | -0,655928373 | -0,614371577 | -0,0415568  |  |
| 243067_at    | -                | -0,655928373 | -0,614371577 | -0,0415568  |  |
| 210653_s_at  | BCKDHB           | 2,272723257  | 2,314300277  | -0,04157702 |  |
| 32502_at     | GDPD5            | 1,172929413  | 1,214517879  | -0,04158847 |  |
| 213864_s_at  | NAP1L1           | 6,161984103  | 6,203628096  | -0,04164399 |  |
| 222105_s_at  | NKIRAS2          | 1,823660386  | 1,865308541  | -0,04164816 |  |
| 214881_s_at  | UBTF             | 0,822971223  | 0,864649967  | -0,04167874 |  |
| 230832_at    | RTF1             | 0,822971223  | 0,864649967  | -0,04167874 |  |
| 232949_at    | -                | 1,063722698  | 1,105412836  | -0,04169014 |  |

|              |                  |              |              |             |  |
|--------------|------------------|--------------|--------------|-------------|--|
| 209980_s_at  | SHMT1            | 0,945567441  | 0,987376598  | -0,04180916 |  |
| 236039_at    | LYPD5            | 0,682279745  | 0,724100169  | -0,04182042 |  |
| 209520_s_at  | NCBP1            | 3,751608593  | 3,793476213  | -0,04186762 |  |
| 39835_at     | SBF1             | 2,50882471   | 2,550701839  | -0,04187713 |  |
| 41657_at     | STK11            | 2,4459226    | 2,487827245  | -0,04190465 |  |
| 201814_at    | TBC1D5           | 2,680059304  | 2,721978587  | -0,04191928 |  |
| 223024_at    | AP1M1            | 3,98734086   | 4,029266691  | -0,04192583 |  |
| 200891_s_at  | SSR1             | 6,182906579  | 6,224834032  | -0,04192745 |  |
| 217872_at    | PIH1D1           | 4,20284547   | 4,244799326  | -0,04195386 |  |
| 201381_x_at  | CACYBP           | 5,510618939  | 5,55264213   | -0,04202319 |  |
| 1552676_at   | UCN3             | -0,325749314 | -0,283667828 | -0,04208149 |  |
| 1555871_at   | TTC28-AS1        | -0,325749314 | -0,283667828 | -0,04208149 |  |
| 1561332_at   | ATP13A5          | -0,325749314 | -0,283667828 | -0,04208149 |  |
| 213973_at    | RRBP1            | -0,325749314 | -0,283667828 | -0,04208149 |  |
| 222820_at    | TNRC6C           | -0,325749314 | -0,283667828 | -0,04208149 |  |
| 225407_at    | MBP              | -0,325749314 | -0,283667828 | -0,04208149 |  |
| 233198_at    | GOLGA2P5         | -0,325749314 | -0,283667828 | -0,04208149 |  |
| 243136_at    | GINS2            | -0,325749314 | -0,283667828 | -0,04208149 |  |
| 243554_at    | -                | -0,325749314 | -0,283667828 | -0,04208149 |  |
| 216389_s_at  | DCAF11           | 1,261018186  | 1,303116084  | -0,0420979  |  |
| 224592_x_at  | HP1BP3           | 3,420201053  | 3,462299654  | -0,0420986  |  |
| 212009_s_at  | STIP1            | 4,329947401  | 4,372110559  | -0,04216316 |  |
| 206656_s_at  | C20orf3          | 4,911014665  | 4,953181111  | -0,04216645 |  |
| 221726_at    | RPL22            | 4,836387413  | 4,878554857  | -0,04216744 |  |
| 1552370_at   | C4orf33          | 0,351548291  | 0,393761504  | -0,04221321 |  |
| 1556296_at   | -                | 0,351548291  | 0,393761504  | -0,04221321 |  |
| 231926_at    | EPS15L1          | 0,351548291  | 0,393761504  | -0,04221321 |  |
| 244007_at    | ZNF462           | 0,351548291  | 0,393761504  | -0,04221321 |  |
| 226845_s_at  | MYEOV2           | 5,171552493  | 5,213773536  | -0,04222104 |  |
| 203208_s_at  | MTFR1            | 4,34540724   | 4,387642594  | -0,04223535 |  |
| 214709_s_at  | KTN1             | 4,912447057  | 4,954720433  | -0,04227338 |  |
| 219547_at    | COX15            | 2,87191078   | 2,914267328  | -0,04235655 |  |
| 211487_x_at  | RPS17 /// RPS17  | 8,008022234  | 8,050393244  | -0,04237101 |  |
| 224938_at    | NUFIP2           | 3,179700672  | 3,222126232  | -0,04242556 |  |
| 220178_at    | MFSD12           | 1,251994932  | 1,294497133  | -0,0425022  |  |
| 221645_s_at  | ZNF83            | 2,2992452    | 2,341749893  | -0,04250469 |  |
| 217742_s_at  | WAC              | 4,029534322  | 4,072129637  | -0,04259532 |  |
| 208668_x_at  | HMGN2            | 7,370740573  | 7,413344855  | -0,04260428 |  |
| 225735_at    | ANKRD50          | 1,512180019  | 1,55481039   | -0,04263037 |  |
| 234665_x_at  | HHLA3            | 1,865674241  | 1,908311039  | -0,0426368  |  |
| 216251_s_at  | TTLL12           | 2,38635068   | 2,428994491  | -0,04264381 |  |
| 224599_at    | CGGBP1           | 3,551027544  | 3,593688577  | -0,04266103 |  |
| 209118_s_at  | TUBA1A           | 4,732770466  | 4,775482021  | -0,04271155 |  |
| 209912_s_at  | AP5Z1 /// MIR465 | 0,661985843  | 0,704715219  | -0,04272938 |  |
| 201931_at    | ETFA             | 4,983675144  | 5,026415289  | -0,04274014 |  |
| 201549_x_at  | KDM5B            | 3,171349466  | 3,21415095   | -0,04280148 |  |
| 202447_at    | DECR1            | 4,208686884  | 4,251494565  | -0,04280768 |  |
| 214453_s_at  | IFI44            | 3,220746604  | 3,263564154  | -0,04281755 |  |
| 227625_s_at  | STUB1            | 5,576477597  | 5,619296533  | -0,04281894 |  |
| 1554883_a_at | ERCC8            | 1,659347917  | 1,702196344  | -0,04284843 |  |
| 1552368_at   | CTCFL            | -2,823166348 | -2,780313924 | -0,04285242 |  |
| 1553834_at   | COL6A5           | -2,823166348 | -2,780313924 | -0,04285242 |  |
| 1554012_at   | RSPO2            | -2,823166348 | -2,780313924 | -0,04285242 |  |
| 1556760_a_at | -                | -2,823166348 | -2,780313924 | -0,04285242 |  |
| 1557195_at   | -                | -2,823166348 | -2,780313924 | -0,04285242 |  |
| 1562650_at   | FRYL             | -2,823166348 | -2,780313924 | -0,04285242 |  |

|              |                 |              |              |             |  |
|--------------|-----------------|--------------|--------------|-------------|--|
| 1562973_at   | -               | -2,823166348 | -2,780313924 | -0,04285242 |  |
| 1565888_at   | -               | -2,823166348 | -2,780313924 | -0,04285242 |  |
| 1566762_at   | -               | -2,823166348 | -2,780313924 | -0,04285242 |  |
| 1570228_at   | CFHR3           | -2,823166348 | -2,780313924 | -0,04285242 |  |
| 209638_x_at  | RGS12           | -2,823166348 | -2,780313924 | -0,04285242 |  |
| 216233_at    | CD163           | -2,823166348 | -2,780313924 | -0,04285242 |  |
| 216613_at    | -               | -2,823166348 | -2,780313924 | -0,04285242 |  |
| 217571_at    | -               | -2,823166348 | -2,780313924 | -0,04285242 |  |
| 217674_at    | -               | -2,823166348 | -2,780313924 | -0,04285242 |  |
| 219803_at    | ANGPTL3         | -2,823166348 | -2,780313924 | -0,04285242 |  |
| 224077_at    | WHSC1L1         | -2,823166348 | -2,780313924 | -0,04285242 |  |
| 231565_at    | C4orf22         | -2,823166348 | -2,780313924 | -0,04285242 |  |
| 232507_at    | C15orf41        | -2,823166348 | -2,780313924 | -0,04285242 |  |
| 233073_at    | -               | -2,823166348 | -2,780313924 | -0,04285242 |  |
| 233295_at    | -               | -2,823166348 | -2,780313924 | -0,04285242 |  |
| 233714_at    | -               | -2,823166348 | -2,780313924 | -0,04285242 |  |
| 234230_at    | -               | -2,823166348 | -2,780313924 | -0,04285242 |  |
| 234413_at    | -               | -2,823166348 | -2,780313924 | -0,04285242 |  |
| 235465_at    | FAM123A         | -2,823166348 | -2,780313924 | -0,04285242 |  |
| 235549_at    | RNF144B         | -2,823166348 | -2,780313924 | -0,04285242 |  |
| 237159_x_at  | AP1S3           | -2,823166348 | -2,780313924 | -0,04285242 |  |
| 237829_at    | -               | -2,823166348 | -2,780313924 | -0,04285242 |  |
| 238796_at    | -               | -2,823166348 | -2,780313924 | -0,04285242 |  |
| 243065_at    | -               | -2,823166348 | -2,780313924 | -0,04285242 |  |
| 243381_at    | -               | -2,823166348 | -2,780313924 | -0,04285242 |  |
| 243867_at    | -               | -2,823166348 | -2,780313924 | -0,04285242 |  |
| 244306_at    | -               | -2,823166348 | -2,780313924 | -0,04285242 |  |
| 219204_s_at  | SRR             | 1,037706275  | 1,080561626  | -0,04285535 |  |
| 225199_at    | LOC100505487    | 3,828735867  | 3,871608557  | -0,04287269 |  |
| 226209_at    | NDUFV3          | 3,243687542  | 3,28656411   | -0,04287657 |  |
| 234978_at    | SLC36A4         | 2,243430036  | 2,286318242  | -0,04288821 |  |
| 218052_s_at  | ATP13A1         | 3,091402928  | 3,134292219  | -0,04288929 |  |
| 204594_s_at  | SMCR7L          | 3,313655555  | 3,356551164  | -0,04289561 |  |
| 207088_s_at  | SLC25A11        | 2,380152406  | 2,423075926  | -0,04292352 |  |
| 206042_x_at  | PAR-SN /// SNOF | 3,920575295  | 3,963505394  | -0,0429301  |  |
| 226282_at    | PTPN14          | 2,035673598  | 2,078620836  | -0,04294724 |  |
| 1553685_s_at | SP1             | 0,334552598  | 0,377530647  | -0,04297805 |  |
| 231016_s_at  | ARNT            | 0,334552598  | 0,377530647  | -0,04297805 |  |
| 240700_at    | TOR1AIP2        | 0,334552598  | 0,377530647  | -0,04297805 |  |
| 227852_at    | RP9             | 2,288253583  | 2,331254065  | -0,04300048 |  |
| 212526_at    | SPG20           | 4,141261013  | 4,18426834   | -0,04300733 |  |
| 220739_s_at  | CNNM3           | 0,792179257  | 0,835239052  | -0,0430598  |  |
| 231119_at    | RFC3            | 0,792179257  | 0,835239052  | -0,0430598  |  |
| 235785_at    | -               | 0,792179257  | 0,835239052  | -0,0430598  |  |
| 217398_x_at  | GAPDH           | 7,87329122   | 7,916376077  | -0,04308486 |  |
| 56256_at     | SIDT2           | 2,916850339  | 2,959949103  | -0,04309876 |  |
| 209508_x_at  | CFLAR           | 1,238353345  | 1,281471383  | -0,04311804 |  |
| 228671_at    | TMEM201         | 1,238353345  | 1,281471383  | -0,04311804 |  |
| 1556000_s_at | BTBD7           | 2,501229299  | 2,544354523  | -0,04312522 |  |
| 221734_at    | PRRC1           | 2,577249059  | 2,620464265  | -0,04321521 |  |
| 1555842_at   | CYTH2           | 1,649074067  | 1,692388143  | -0,04331408 |  |
| 1557818_x_at | -               | 0,133056859  | 0,176436073  | -0,04337921 |  |
| 1560928_at   | LOC151657       | 0,133056859  | 0,176436073  | -0,04337921 |  |
| 205796_at    | TCP11L1         | 0,133056859  | 0,176436073  | -0,04337921 |  |
| 214900_at    | ZKSCAN1         | 0,133056859  | 0,176436073  | -0,04337921 |  |
| 222769_at    | MTHFSD          | 0,133056859  | 0,176436073  | -0,04337921 |  |

|             |                 |              |              |             |  |
|-------------|-----------------|--------------|--------------|-------------|--|
| 227968_at   | PDDC1           | 0,133056859  | 0,176436073  | -0,04337921 |  |
| 229089_at   | ZBTB49          | 0,133056859  | 0,176436073  | -0,04337921 |  |
| 229874_x_at | LOC100506687    | 0,133056859  | 0,176436073  | -0,04337921 |  |
| 238960_s_at | LARP4           | 0,133056859  | 0,176436073  | -0,04337921 |  |
| 1562778_at  | FAM166A         | -0,089689931 | -0,046302147 | -0,04338778 |  |
| 205215_at   | RNF2            | -0,089689931 | -0,046302147 | -0,04338778 |  |
| 223868_s_at | WWOX            | -0,089689931 | -0,046302147 | -0,04338778 |  |
| 230872_s_at | ARPC4-TTLL3 /// | -0,089689931 | -0,046302147 | -0,04338778 |  |
| 236309_x_at | ZMIZ2           | -0,089689931 | -0,046302147 | -0,04338778 |  |
| 238539_at   | HPS3            | -0,089689931 | -0,046302147 | -0,04338778 |  |
| 243383_at   | -               | -0,089689931 | -0,046302147 | -0,04338778 |  |
| 200063_s_at | NPM1            | 7,68279056   | 7,726191436  | -0,04340088 |  |
| 203429_s_at | C1orf9          | 2,182996494  | 2,226407528  | -0,04341103 |  |
| 38037_at    | HBEGF           | -0,106214051 | -0,062797093 | -0,04341696 |  |
| 201544_x_at | BCL2L2-PABPN1   | 5,866486266  | 5,90996843   | -0,04348216 |  |
| 212445_s_at | NEDD4L          | 1,493160564  | 1,536652708  | -0,04349214 |  |
| 212682_s_at | LMF2            | 2,277177578  | 2,320681318  | -0,04350374 |  |
| 206670_s_at | GAD1            | 3,050355245  | 3,09388391   | -0,04352867 |  |
| 226215_s_at | KDM2B           | 3,050355245  | 3,09388391   | -0,04352867 |  |
| 225806_at   | AJUBA           | 2,022468633  | 2,066015817  | -0,04354718 |  |
| 202251_at   | PRPF3           | 2,845159691  | 2,888726553  | -0,04356686 |  |
| 212357_at   | FAM168A         | 1,021868205  | 1,065442793  | -0,04357459 |  |
| 1553803_at  | TEX34           | 1,844820248  | 1,888402606  | -0,04358236 |  |
| 1553934_at  | LINC00305       | -2,779459409 | -2,735862426 | -0,04359698 |  |
| 1554910_at  | PRKD3           | -2,779459409 | -2,735862426 | -0,04359698 |  |
| 1559688_at  | GRAPL           | -2,779459409 | -2,735862426 | -0,04359698 |  |
| 1560703_at  | C17orf108       | -2,779459409 | -2,735862426 | -0,04359698 |  |
| 1561961_at  | PHF2P1          | -2,779459409 | -2,735862426 | -0,04359698 |  |
| 1563677_at  | CDON            | -2,779459409 | -2,735862426 | -0,04359698 |  |
| 1564905_at  | -               | -2,779459409 | -2,735862426 | -0,04359698 |  |
| 1565788_at  | -               | -2,779459409 | -2,735862426 | -0,04359698 |  |
| 1569842_at  | LOC728114       | -2,779459409 | -2,735862426 | -0,04359698 |  |
| 205533_s_at | CDH6            | -2,779459409 | -2,735862426 | -0,04359698 |  |
| 206344_at   | PON1            | -2,779459409 | -2,735862426 | -0,04359698 |  |
| 207539_s_at | IL4             | -2,779459409 | -2,735862426 | -0,04359698 |  |
| 207672_at   | RFX4            | -2,779459409 | -2,735862426 | -0,04359698 |  |
| 211357_s_at | ALDOB           | -2,779459409 | -2,735862426 | -0,04359698 |  |
| 216191_s_at | TRDV3           | -2,779459409 | -2,735862426 | -0,04359698 |  |
| 219651_at   | DPPA4           | -2,779459409 | -2,735862426 | -0,04359698 |  |
| 221898_at   | PDPN            | -2,779459409 | -2,735862426 | -0,04359698 |  |
| 226256_at   | COPB2           | -2,779459409 | -2,735862426 | -0,04359698 |  |
| 232851_at   | FBXO3           | -2,779459409 | -2,735862426 | -0,04359698 |  |
| 233059_at   | KCNJ3           | -2,779459409 | -2,735862426 | -0,04359698 |  |
| 236237_at   | -               | -2,779459409 | -2,735862426 | -0,04359698 |  |
| 237161_at   | LOC100506059    | -2,779459409 | -2,735862426 | -0,04359698 |  |
| 238362_at   | -               | -2,779459409 | -2,735862426 | -0,04359698 |  |
| 238649_at   | PITPNC1         | -2,779459409 | -2,735862426 | -0,04359698 |  |
| 240262_at   | -               | -2,779459409 | -2,735862426 | -0,04359698 |  |
| 240987_at   | -               | -2,779459409 | -2,735862426 | -0,04359698 |  |
| 241583_x_at | -               | -2,779459409 | -2,735862426 | -0,04359698 |  |
| 242404_at   | -               | -2,779459409 | -2,735862426 | -0,04359698 |  |
| 243031_at   | -               | -2,779459409 | -2,735862426 | -0,04359698 |  |
| 244107_at   | -               | -2,779459409 | -2,735862426 | -0,04359698 |  |
| 244829_at   | LINC00518       | -2,779459409 | -2,735862426 | -0,04359698 |  |
| 218606_at   | ZDHC7           | 3,251631457  | 3,295230443  | -0,04359899 |  |
| 203449_s_at | TERF1           | 3,203298287  | 3,246908183  | -0,0436099  |  |

|              |                  |              |              |             |  |
|--------------|------------------|--------------|--------------|-------------|--|
| 208290_s_at  | EIF5             | 5,487500141  | 5,531136224  | -0,04363608 |  |
| 202167_s_at  | MMS19            | 3,12638592   | 3,170070041  | -0,04368412 |  |
| 218639_s_at  | ZXDC             | 1,406361373  | 1,450051551  | -0,04369018 |  |
| 211995_x_at  | ACTG1            | 7,871128967  | 7,914839206  | -0,04371024 |  |
| 203301_s_at  | DMTF1            | 3,017453847  | 3,061230246  | -0,0437764  |  |
| 201033_x_at  | RPLP0            | 7,900613414  | 7,944409212  | -0,0437958  |  |
| 201769_at    | CLINT1           | 4,807809007  | 4,851633873  | -0,04382487 |  |
| 1566236_at   | DGCR12           | -0,366776884 | -0,322870281 | -0,0439066  |  |
| 211495_x_at  | TNFSF12 /// TNF  | -0,366776884 | -0,322870281 | -0,0439066  |  |
| 213563_s_at  | TUBGCP2          | -0,366776884 | -0,322870281 | -0,0439066  |  |
| 235646_at    | -                | -0,366776884 | -0,322870281 | -0,0439066  |  |
| 237009_at    | -                | -0,366776884 | -0,322870281 | -0,0439066  |  |
| 208922_s_at  | NXF1             | 2,986507217  | 3,030417996  | -0,04391078 |  |
| 202317_s_at  | UBE4B            | 2,014487247  | 2,058399602  | -0,04391235 |  |
| 208734_x_at  | RAB2A            | 4,196392479  | 4,24031851   | -0,04392603 |  |
| 214114_x_at  | FASTK            | 3,722507547  | 3,766462619  | -0,04395507 |  |
| 206066_s_at  | RAD51C           | 3,219589925  | 3,263564154  | -0,04397423 |  |
| 210041_s_at  | PGM3             | 2,669932407  | 2,713921281  | -0,04398887 |  |
| 223991_s_at  | GALNT2           | 1,835789711  | 1,879785595  | -0,04399588 |  |
| 224874_at    | POLR1D           | 3,242549117  | 3,28656411   | -0,04401499 |  |
| 213578_at    | BMPR1A           | 1,481627361  | 1,525647381  | -0,04402002 |  |
| 212174_at    | AK2              | 3,55745065   | 3,601570866  | -0,04412022 |  |
| 211978_x_at  | LOC100288602 /   | 7,597761042  | 7,641883625  | -0,04412258 |  |
| 50376_at     | ZNF444           | 2,768138014  | 2,812295819  | -0,04415781 |  |
| 1560082_at   | -                | 0,30867765   | 0,352836757  | -0,04415911 |  |
| 213817_at    | IRAK3            | 0,30867765   | 0,352836757  | -0,04415911 |  |
| 230511_at    | CREM             | 0,30867765   | 0,352836757  | -0,04415911 |  |
| 238087_at    | RTCA             | 1,215326747  | 1,259496994  | -0,04417025 |  |
| 204254_s_at  | VDR              | 1,767779954  | 1,811954245  | -0,04417429 |  |
| 1553498_at   | -                | -1,308181863 | -1,264005341 | -0,04417652 |  |
| 1565436_s_at | MLL              | -1,308181863 | -1,264005341 | -0,04417652 |  |
| 1565583_at   | ZSCAN5A          | -1,308181863 | -1,264005341 | -0,04417652 |  |
| 1568748_at   | LOC100508869     | -1,308181863 | -1,264005341 | -0,04417652 |  |
| 1569201_a_at | -                | -1,308181863 | -1,264005341 | -0,04417652 |  |
| 204058_at    | ME1              | -1,308181863 | -1,264005341 | -0,04417652 |  |
| 206208_at    | CA4              | -1,308181863 | -1,264005341 | -0,04417652 |  |
| 207369_at    | BRS3             | -1,308181863 | -1,264005341 | -0,04417652 |  |
| 210314_x_at  | TNFSF13          | -1,308181863 | -1,264005341 | -0,04417652 |  |
| 215010_s_at  | BRSK2            | -1,308181863 | -1,264005341 | -0,04417652 |  |
| 219423_x_at  | TNFRSF25         | -1,308181863 | -1,264005341 | -0,04417652 |  |
| 222956_at    | FIGN             | -1,308181863 | -1,264005341 | -0,04417652 |  |
| 234258_at    | -                | -1,308181863 | -1,264005341 | -0,04417652 |  |
| 236423_at    | -                | -1,308181863 | -1,264005341 | -0,04417652 |  |
| 236800_at    | UCMA             | -1,308181863 | -1,264005341 | -0,04417652 |  |
| 237553_at    | LZTFL1           | -1,308181863 | -1,264005341 | -0,04417652 |  |
| 238804_at    | -                | -1,308181863 | -1,264005341 | -0,04417652 |  |
| 239045_at    | -                | -1,308181863 | -1,264005341 | -0,04417652 |  |
| 242823_at    | ADAMTS18         | -1,308181863 | -1,264005341 | -0,04417652 |  |
| 242884_at    | LOC440570        | -1,308181863 | -1,264005341 | -0,04417652 |  |
| 209433_s_at  | PPAT             | 3,979845523  | 4,024062565  | -0,04421704 |  |
| 222630_at    | RFX7             | 3,536237877  | 3,580454966  | -0,04421709 |  |
| 224871_at    | TPRG1L           | 3,307136232  | 3,351366359  | -0,04423013 |  |
| 227384_s_at  | LOC727820 /// LC | 0,627515113  | 0,67181667   | -0,04430156 |  |
| 238086_at    | LOC100129617     | 0,627515113  | 0,67181667   | -0,04430156 |  |
| 211452_x_at  | LRRFIP1          | 4,327801949  | 4,372110559  | -0,04430861 |  |
| 244462_at    | ZNF224           | 1,305306849  | 1,349621332  | -0,04431448 |  |

|              |                  |              |              |             |  |
|--------------|------------------|--------------|--------------|-------------|--|
| 208904_s_at  | RPS28            | 7,349879857  | 7,394249113  | -0,04436926 |  |
| 226929_at    | MTHFR            | 1,473887017  | 1,518263577  | -0,04437656 |  |
| 226965_at    | FAM116A          | 3,433232044  | 3,477609204  | -0,04437716 |  |
| 221817_at    | DOLPP1           | 2,918276951  | 2,962671751  | -0,0443948  |  |
| 238435_at    | LOC100506661     | 0,888485433  | 0,932882274  | -0,04439684 |  |
| 225670_at    | FAM173B          | 2,109966786  | 2,154405725  | -0,04443894 |  |
| 44617_at     | OGFOD2           | 1,794437832  | 1,838878025  | -0,04444019 |  |
| 207830_s_at  | PPP1R8           | 4,313236089  | 4,357702907  | -0,04446682 |  |
| 216532_x_at  | -                | 4,208103806  | 4,252607423  | -0,04450362 |  |
| 223479_s_at  | CHCHD5           | 1,621313976  | 1,665902186  | -0,04458821 |  |
| 228667_at    | AGPAT4           | 1,621313976  | 1,665902186  | -0,04458821 |  |
| 220004_at    | DDX43            | 2,546213279  | 2,590852465  | -0,04463919 |  |
| 203550_s_at  | FAM189B          | 2,912562019  | 2,957221307  | -0,04465929 |  |
| 226334_s_at  | AHSA2            | 1,689737652  | 1,73441697   | -0,04467932 |  |
| 201148_s_at  | TIMP3            | 3,563845287  | 3,608541373  | -0,04469609 |  |
| 1555866_a_at | HEXDC            | 1,940595304  | 1,98530622   | -0,04471092 |  |
| 213911_s_at  | H2AFZ            | 7,236085358  | 7,280807085  | -0,04472173 |  |
| 213787_s_at  | EBP              | 3,599852114  | 3,644594022  | -0,04474191 |  |
| 214507_s_at  | EXOSC2           | 2,652894659  | 2,697670403  | -0,04477574 |  |
| 205711_x_at  | ATP5C1           | 5,721420853  | 5,766205262  | -0,04478441 |  |
| 206009_at    | ITGA9            | 0,995078803  | 1,039887232  | -0,04480843 |  |
| 224432_at    | SH3GLB2          | 0,995078803  | 1,039887232  | -0,04480843 |  |
| 203387_s_at  | TBC1D4           | 3,634114217  | 3,678940066  | -0,04482585 |  |
| 202887_s_at  | DDIT4            | 4,951290627  | 4,996171578  | -0,04488095 |  |
| 210410_s_at  | MSH5 /// MSH5-S  | 1,292162421  | 1,337086025  | -0,0449236  |  |
| 213469_at    | PGAP1            | 0,613492853  | 0,658444279  | -0,04495143 |  |
| 217148_x_at  | CKAP2 /// IGLC1  | 0,613492853  | 0,658444279  | -0,04495143 |  |
| 226870_at    | COMTD1           | 0,613492853  | 0,658444279  | -0,04495143 |  |
| 215706_x_at  | ZYX              | 3,046446467  | 3,091398163  | -0,0449517  |  |
| 223086_x_at  | MRPL51           | 6,046378596  | 6,091333452  | -0,04495486 |  |
| 222987_s_at  | TMEM9            | 3,19743497   | 3,242433922  | -0,04499895 |  |
| 201710_at    | MYBL2            | 3,612245157  | 3,6572547    | -0,04500954 |  |
| 224334_s_at  | MRPL51 /// SPTL  | 3,612245157  | 3,6572547    | -0,04500954 |  |
| 201396_s_at  | SGTA             | 2,097427503  | 2,14244844   | -0,04502094 |  |
| 39548_at     | NPAS2            | -2,620161722 | -2,575129729 | -0,04503199 |  |
| 223209_s_at  | VIMP             | 4,255150375  | 4,300204247  | -0,04505387 |  |
| 204990_s_at  | ITGB4            | -0,394749123 | -0,34958478  | -0,04516434 |  |
| 208978_at    | CRIP2            | -0,394749123 | -0,34958478  | -0,04516434 |  |
| 243668_at    | MED28            | -0,394749123 | -0,34958478  | -0,04516434 |  |
| 202042_at    | HARS             | 4,252325187  | 4,297510916  | -0,04518573 |  |
| 217899_at    | TMEM214          | 1,373456798  | 1,418668082  | -0,04521128 |  |
| 213260_at    | FOXC1            | 1,191926657  | 1,23718272   | -0,04525606 |  |
| 210949_s_at  | EIF3C /// EIF3CL | 5,203789369  | 5,249050572  | -0,0452612  |  |
| 204772_s_at  | TTF1             | 2,493593689  | 2,538891651  | -0,04529796 |  |
| 1569293_x_at | CROCCP2          | 0,984222186  | 1,029536893  | -0,04531471 |  |
| 212293_at    | HIPK1            | 3,926967479  | 3,972313606  | -0,04534613 |  |
| 201099_at    | USP9X            | 4,282548314  | 4,327920804  | -0,04537249 |  |
| 1555638_a_at | SAMSN1           | 1,672933557  | 1,718396606  | -0,04546305 |  |
| 214280_x_at  | HNRNPA1          | 5,626863946  | 5,672339468  | -0,04547552 |  |
| 225311_at    | IVD              | 2,864529541  | 2,910041809  | -0,04551227 |  |
| 203430_at    | HEBP2            | 4,045288912  | 4,090916839  | -0,04562793 |  |
| 228200_at    | ZNF252P          | 2,320980353  | 2,366632651  | -0,0456523  |  |
| 225513_at    | SCRN2            | 0,083054335  | 0,128747141  | -0,04569281 |  |
| 236292_at    | RNF130           | 0,083054335  | 0,128747141  | -0,04569281 |  |
| 1554976_a_at | LINC00051        | -2,667025278 | -2,621331989 | -0,04569329 |  |
| 1556492_a_at | -                | -2,667025278 | -2,621331989 | -0,04569329 |  |



|             |              |              |              |             |  |
|-------------|--------------|--------------|--------------|-------------|--|
| 1557896_at  | -            | -2,667025278 | -2,621331989 | -0,04569329 |  |
| 1558672_at  | -            | -2,667025278 | -2,621331989 | -0,04569329 |  |
| 1560177_at  | CCDC66       | -2,667025278 | -2,621331989 | -0,04569329 |  |
| 1562414_at  | LOC100509814 | -2,667025278 | -2,621331989 | -0,04569329 |  |
| 1566455_at  | LOC100507494 | -2,667025278 | -2,621331989 | -0,04569329 |  |
| 210969_at   | PKN2         | -2,667025278 | -2,621331989 | -0,04569329 |  |
| 211390_at   | N4BP2L1      | -2,667025278 | -2,621331989 | -0,04569329 |  |
| 211775_x_at | MGC13053     | -2,667025278 | -2,621331989 | -0,04569329 |  |
| 214350_at   | SNTB2        | -2,667025278 | -2,621331989 | -0,04569329 |  |
| 215643_at   | SEMA3D       | -2,667025278 | -2,621331989 | -0,04569329 |  |
| 216113_at   | ABI2         | -2,667025278 | -2,621331989 | -0,04569329 |  |
| 217278_x_at | -            | -2,667025278 | -2,621331989 | -0,04569329 |  |
| 220187_at   | STEAP4       | -2,667025278 | -2,621331989 | -0,04569329 |  |
| 220821_at   | GALR1        | -2,667025278 | -2,621331989 | -0,04569329 |  |
| 228750_at   | -            | -2,667025278 | -2,621331989 | -0,04569329 |  |
| 233839_at   | EFCAB6       | -2,667025278 | -2,621331989 | -0,04569329 |  |
| 238410_x_at | -            | -2,667025278 | -2,621331989 | -0,04569329 |  |
| 240523_at   | ATPBD4-AS1   | -2,667025278 | -2,621331989 | -0,04569329 |  |
| 242522_at   | TCF24        | -2,667025278 | -2,621331989 | -0,04569329 |  |
| 242977_at   | LOC100506128 | -2,667025278 | -2,621331989 | -0,04569329 |  |
| 244673_at   | -            | -2,667025278 | -2,621331989 | -0,04569329 |  |
| 217829_s_at | USP39        | 3,082523011  | 3,128242026  | -0,04571902 |  |
| 208801_at   | SRP72        | 5,632958831  | 5,678873589  | -0,04591476 |  |
| 204229_at   | SLC17A7      | 1,177702228  | 1,223626587  | -0,04592436 |  |
| 219653_at   | LSM14B       | 1,177702228  | 1,223626587  | -0,04592436 |  |
| 202623_at   | EAPP         | 3,645356455  | 3,691304166  | -0,04594771 |  |
| 202056_at   | KPNA1        | 3,313655555  | 3,359653127  | -0,04599757 |  |
| 210573_s_at | POLR3C       | 1,85379461   | 1,899812471  | -0,04601786 |  |
| 208715_at   | TMCO1        | 2,882181479  | 2,928263672  | -0,04608219 |  |
| 1563222_at  | TMBIM4       | -0,148196756 | -0,102100538 | -0,04609622 |  |
| 204541_at   | SEC14L2      | -0,148196756 | -0,102100538 | -0,04609622 |  |
| 210301_at   | XDH          | -0,148196756 | -0,102100538 | -0,04609622 |  |
| 230451_at   | LOC100506974 | -0,148196756 | -0,102100538 | -0,04609622 |  |
| 221776_s_at | BRD7         | 3,310399576  | 3,356551164  | -0,04615159 |  |
| 204808_s_at | TMEM5        | 3,641042878  | 3,687194562  | -0,04615168 |  |
| 218011_at   | UBL5         | 5,541958837  | 5,588118524  | -0,04615969 |  |
| 219289_at   | HEATR3       | 2,352981171  | 2,39915583   | -0,04617466 |  |
| 226375_at   | LMTK2        | 1,965648824  | 2,011838132  | -0,04618931 |  |
| 202214_s_at | CUL4B        | 4,404623843  | 4,450819624  | -0,04619578 |  |
| 213051_at   | ZC3HAV1      | 3,893994642  | 3,940211012  | -0,04621637 |  |
| 213757_at   | -            | 1,434549838  | 1,480766833  | -0,046217   |  |
| 1558900_at  | -            | -3,448416261 | -3,402185466 | -0,04623079 |  |
| 1487_at     | ESRRA        | 2,218170265  | 2,264418116  | -0,04624785 |  |
| 222412_s_at | SSR3         | 2,218170265  | 2,264418116  | -0,04624785 |  |
| 212614_at   | ARID5B       | 1,58584542   | 1,632095957  | -0,04625054 |  |
| 223742_at   | MRPL4        | 3,329826127  | 3,376085218  | -0,04625909 |  |
| 216309_x_at | JRK          | 1,655931423  | 1,702196344  | -0,04626492 |  |
| 225084_at   | EXOC5        | 4,170287948  | 4,216563145  | -0,0462752  |  |
| 231271_x_at | NMRAL1       | 2,11992033   | 2,166264721  | -0,04634439 |  |
| 217516_x_at | ARVCF        | 1,168140757  | 1,214517879  | -0,04637712 |  |
| 211936_at   | HSPA5        | 6,130481876  | 6,176912838  | -0,04643096 |  |
| 200093_s_at | HINT1        | 4,939395719  | 4,985836263  | -0,04644054 |  |
| 210638_s_at | FBXO9        | 5,16074523   | 5,207187542  | -0,04644231 |  |
| 225075_at   | PDRG1        | 3,32445605   | 3,370970266  | -0,04651422 |  |
| 215696_s_at | SEC16A       | 3,428234044  | 3,474751011  | -0,04651697 |  |
| 1553672_at  | ENAH         | -1,424023738 | -1,377419394 | -0,04660434 |  |

|              |                  |              |              |             |  |
|--------------|------------------|--------------|--------------|-------------|--|
| 1553889_at   | MRGPRX2          | -1,424023738 | -1,377419394 | -0,04660434 |  |
| 1554310_a_at | EIF4G3           | -1,424023738 | -1,377419394 | -0,04660434 |  |
| 1555855_at   | AKR1C1           | -1,424023738 | -1,377419394 | -0,04660434 |  |
| 1566842_at   | -                | -1,424023738 | -1,377419394 | -0,04660434 |  |
| 1569937_at   | -                | -1,424023738 | -1,377419394 | -0,04660434 |  |
| 1570061_at   | -                | -1,424023738 | -1,377419394 | -0,04660434 |  |
| 210339_s_at  | KLK2             | -1,424023738 | -1,377419394 | -0,04660434 |  |
| 211438_at    | TRHR             | -1,424023738 | -1,377419394 | -0,04660434 |  |
| 211688_x_at  | KIR3DL1 /// KIR3 | -1,424023738 | -1,377419394 | -0,04660434 |  |
| 213800_at    | CFH              | -1,424023738 | -1,377419394 | -0,04660434 |  |
| 214889_at    | FAM149A          | -1,424023738 | -1,377419394 | -0,04660434 |  |
| 215745_at    | -                | -1,424023738 | -1,377419394 | -0,04660434 |  |
| 217077_s_at  | GABBR2           | -1,424023738 | -1,377419394 | -0,04660434 |  |
| 219660_s_at  | ATP8A2           | -1,424023738 | -1,377419394 | -0,04660434 |  |
| 220490_at    | SERINC2          | -1,424023738 | -1,377419394 | -0,04660434 |  |
| 223605_at    | SLC25A18         | -1,424023738 | -1,377419394 | -0,04660434 |  |
| 227147_s_at  | EGLN2            | -1,424023738 | -1,377419394 | -0,04660434 |  |
| 230695_s_at  | RSPH9            | -1,424023738 | -1,377419394 | -0,04660434 |  |
| 230812_at    | LOC100499467     | -1,424023738 | -1,377419394 | -0,04660434 |  |
| 233474_at    | LOC284240        | -1,424023738 | -1,377419394 | -0,04660434 |  |
| 233823_at    | FAM184B          | -1,424023738 | -1,377419394 | -0,04660434 |  |
| 234469_at    | OR51B4           | -1,424023738 | -1,377419394 | -0,04660434 |  |
| 235449_at    | LRSAM1           | -1,424023738 | -1,377419394 | -0,04660434 |  |
| 237156_at    | -                | -1,424023738 | -1,377419394 | -0,04660434 |  |
| 237769_at    | -                | -1,424023738 | -1,377419394 | -0,04660434 |  |
| 240139_at    | -                | -1,424023738 | -1,377419394 | -0,04660434 |  |
| 240332_at    | -                | -1,424023738 | -1,377419394 | -0,04660434 |  |
| 240490_at    | -                | -1,424023738 | -1,377419394 | -0,04660434 |  |
| 241422_at    | -                | -1,424023738 | -1,377419394 | -0,04660434 |  |
| 231298_at    | LOC100507425     | 0,57782909   | 0,624460759  | -0,04663167 |  |
| 213995_at    | ATP5S            | 2,2992452    | 2,345926937  | -0,04668174 |  |
| 202858_at    | U2AF1            | 7,084858805  | 7,131602559  | -0,04674375 |  |
| 218225_at    | ECSIT            | 3,792633459  | 3,839380885  | -0,04674743 |  |
| 37152_at     | PPARD            | 1,6796787    | 1,726429025  | -0,04675032 |  |
| 208939_at    | SEPHS1           | 3,034656185  | 3,081412119  | -0,04675593 |  |
| 218313_s_at  | GALNT7           | 4,372199749  | 4,418957488  | -0,04675774 |  |
| 222396_at    | HN1              | 3,89689195   | 3,943660335  | -0,04676839 |  |
| 200844_s_at  | PRDX6            | 6,362954664  | 6,409781186  | -0,04682652 |  |
| 225749_at    | C16orf91         | 2,774453351  | 2,821324225  | -0,04687087 |  |
| 223338_s_at  | ATPIF1           | 4,295231314  | 4,34210478   | -0,04687347 |  |
| 224129_s_at  | DPY30            | 5,096036413  | 5,142923791  | -0,04688738 |  |
| 200017_at    | RPS27A           | 7,433693108  | 7,480603866  | -0,04691076 |  |
| 218022_at    | VRK3             | 2,535098095  | 2,582026171  | -0,04692808 |  |
| 201941_at    | CPD              | 2,107467633  | 2,154405725  | -0,04693809 |  |
| 204157_s_at  | SIK3             | 1,496984567  | 1,543943227  | -0,04695866 |  |
| 211975_at    | ARFGAP2          | 2,708372067  | 2,755336312  | -0,04696424 |  |
| 210664_s_at  | TFPI             | 4,605276663  | 4,652299155  | -0,04702249 |  |
| 208767_s_at  | LAPTM4B          | 5,578283569  | 5,62532322   | -0,04703965 |  |
| 203383_s_at  | GOLGA1           | 1,153678675  | 1,200746069  | -0,04706739 |  |
| 203720_s_at  | ERCC1            | 3,586454644  | 3,633530837  | -0,04707619 |  |
| 1554600_s_at | LMNA             | 3,177319542  | 3,22439681   | -0,04707727 |  |
| 204649_at    | TROAP            | 1,638726528  | 1,685812099  | -0,04708557 |  |
| 229429_x_at  | LOC728855 /// LC | 1,638726528  | 1,685812099  | -0,04708557 |  |
| 208117_s_at  | LAS1L            | 3,75400739   | 3,801102381  | -0,04709499 |  |
| 1552575_a_at | C6orf141         | -0,43775896  | -0,39061235  | -0,04714661 |  |
| 1558529_s_at | LOC100508047     | -0,43775896  | -0,39061235  | -0,04714661 |  |

|              |                  |              |              |             |  |
|--------------|------------------|--------------|--------------|-------------|--|
| 211233_x_at  | ESR1             | -0,43775896  | -0,39061235  | -0,04714661 |  |
| 221134_at    | ANGPT4           | -0,43775896  | -0,39061235  | -0,04714661 |  |
| 224817_at    | SH3PXD2A         | -0,43775896  | -0,39061235  | -0,04714661 |  |
| 234884_x_at  | CKAP2 /// IGLC1  | -0,43775896  | -0,39061235  | -0,04714661 |  |
| 236174_at    | -                | -0,43775896  | -0,39061235  | -0,04714661 |  |
| 240555_at    | -                | -0,43775896  | -0,39061235  | -0,04714661 |  |
| 217969_at    | C11orf2          | 2,637386731  | 2,684536601  | -0,04714987 |  |
| 222021_x_at  | SDHAP1 /// SDH   | 3,999522577  | 4,046693299  | -0,04717072 |  |
| 212639_x_at  | LOC100288366 /   | 7,830460376  | 7,877634755  | -0,04717438 |  |
| 204488_at    | DOLK             | 1,414471577  | 1,461646549  | -0,04717497 |  |
| 213445_at    | ZC3H3            | 1,331241794  | 1,378453643  | -0,04721185 |  |
| 211710_x_at  | RPL4 /// SNORD   | 7,307843506  | 7,35515271   | -0,0473092  |  |
| 203216_s_at  | MYO6             | 1,764611101  | 1,811954245  | -0,04734314 |  |
| 214986_x_at  | PPIL2            | 1,764611101  | 1,811954245  | -0,04734314 |  |
| 225356_at    | -                | 3,307136232  | 3,354479478  | -0,04734325 |  |
| 1560622_at   | -                | 3,171349466  | 3,218713651  | -0,04736418 |  |
| 202128_at    | KIAA0317         | 3,912008086  | 3,959421856  | -0,04741377 |  |
| 38290_at     | RGS14            | -1,062787113 | -1,015359931 | -0,04742718 |  |
| 226008_at    | NDNL2            | 1,560488174  | 1,60795124   | -0,04746307 |  |
| 1553347_s_at | KCNA6            | -1,470833215 | -1,423348341 | -0,04748487 |  |
| 1555048_a_at | TSPEAR           | -1,470833215 | -1,423348341 | -0,04748487 |  |
| 1555323_at   | ABCB9            | -1,470833215 | -1,423348341 | -0,04748487 |  |
| 1562406_at   | -                | -1,470833215 | -1,423348341 | -0,04748487 |  |
| 1566598_at   | -                | -1,470833215 | -1,423348341 | -0,04748487 |  |
| 1569564_at   | -                | -1,470833215 | -1,423348341 | -0,04748487 |  |
| 204724_s_at  | COL9A3           | -1,470833215 | -1,423348341 | -0,04748487 |  |
| 213162_at    | DYNC1LI2         | -1,470833215 | -1,423348341 | -0,04748487 |  |
| 213419_at    | APBB2            | -1,470833215 | -1,423348341 | -0,04748487 |  |
| 214509_at    | HIST1H3A /// HIS | -1,470833215 | -1,423348341 | -0,04748487 |  |
| 214891_at    | FBXO21           | -1,470833215 | -1,423348341 | -0,04748487 |  |
| 216886_at    | CHRNA4           | -1,470833215 | -1,423348341 | -0,04748487 |  |
| 234229_at    | -                | -1,470833215 | -1,423348341 | -0,04748487 |  |
| 236091_at    | HMGB2            | -1,470833215 | -1,423348341 | -0,04748487 |  |
| 239987_at    | -                | -1,470833215 | -1,423348341 | -0,04748487 |  |
| 243934_at    | -                | -1,470833215 | -1,423348341 | -0,04748487 |  |
| 223008_s_at  | TMEM245          | 4,018934862  | 4,066445436  | -0,04751057 |  |
| 224920_x_at  | MYADM            | 3,120200849  | 3,16771226   | -0,04751141 |  |
| 218155_x_at  | TSR1             | 2,696781084  | 2,744302548  | -0,04752146 |  |
| 203224_at    | RFK              | 4,324577776  | 4,372110559  | -0,04753278 |  |
| 209578_s_at  | POFUT2           | 2,094906514  | 2,14244844   | -0,04754193 |  |
| 200023_s_at  | EIF3F            | 6,158668523  | 6,206215175  | -0,04754665 |  |
| 36475_at     | GCAT             | 1,66275634   | 1,710319214  | -0,04756287 |  |
| 212721_at    | SREK1            | 4,539590968  | 4,58718675   | -0,04759578 |  |
| 1555904_at   | -                | -2,551294263 | -2,503677622 | -0,04761664 |  |
| 1559030_a_at | -                | -2,551294263 | -2,503677622 | -0,04761664 |  |
| 1560207_at   | RAD21-AS1        | -2,551294263 | -2,503677622 | -0,04761664 |  |
| 1564468_at   | -                | -2,551294263 | -2,503677622 | -0,04761664 |  |
| 1568939_at   | -                | -2,551294263 | -2,503677622 | -0,04761664 |  |
| 204753_s_at  | HLF              | -2,551294263 | -2,503677622 | -0,04761664 |  |
| 205964_at    | ZNF426           | -2,551294263 | -2,503677622 | -0,04761664 |  |
| 206457_s_at  | DIO1             | -2,551294263 | -2,503677622 | -0,04761664 |  |
| 206819_at    | POM121L9P        | -2,551294263 | -2,503677622 | -0,04761664 |  |
| 210390_s_at  | CCL14 /// CCL14  | -2,551294263 | -2,503677622 | -0,04761664 |  |
| 213664_at    | SLC1A1           | -2,551294263 | -2,503677622 | -0,04761664 |  |
| 216408_at    | OR2B2            | -2,551294263 | -2,503677622 | -0,04761664 |  |
| 217340_at    | -                | -2,551294263 | -2,503677622 | -0,04761664 |  |

|              |                  |              |              |             |  |
|--------------|------------------|--------------|--------------|-------------|--|
| 220752_at    | LOC51145         | -2,551294263 | -2,503677622 | -0,04761664 |  |
| 223838_at    | TSGA10           | -2,551294263 | -2,503677622 | -0,04761664 |  |
| 224496_s_at  | TMEM107          | -2,551294263 | -2,503677622 | -0,04761664 |  |
| 227952_at    | -                | -2,551294263 | -2,503677622 | -0,04761664 |  |
| 233471_at    | PTPN5            | -2,551294263 | -2,503677622 | -0,04761664 |  |
| 239884_at    | CADPS            | -2,551294263 | -2,503677622 | -0,04761664 |  |
| 240924_x_at  | -                | -2,551294263 | -2,503677622 | -0,04761664 |  |
| 241534_at    | LOC100505549     | -2,551294263 | -2,503677622 | -0,04761664 |  |
| 241709_s_at  | DOCK1            | -2,551294263 | -2,503677622 | -0,04761664 |  |
| 242215_at    | GRIK4            | -2,551294263 | -2,503677622 | -0,04761664 |  |
| 1562022_s_at | LOC100130987 /   | 2,520143371  | 2,567790814  | -0,04764744 |  |
| 219799_s_at  | DHRS9            | 0,555999837  | 0,603679647  | -0,04767981 |  |
| 235923_at    | VTI1A            | 0,555999837  | 0,603679647  | -0,04767981 |  |
| 239014_at    | CCAR1            | 0,555999837  | 0,603679647  | -0,04767981 |  |
| 224721_at    | WDR75            | 3,62627949   | 3,673964604  | -0,04768511 |  |
| 232581_x_at  | HIVEP3           | 1,233777334  | 1,281471383  | -0,04769405 |  |
| 207144_s_at  | CITED1           | 1,40228911   | 1,450051551  | -0,04776244 |  |
| 219884_at    | LHX6             | 2,232003119  | 2,27978304   | -0,04777992 |  |
| 201264_at    | COPE             | 4,952683603  | 5,000483804  | -0,0478002  |  |
| 210447_at    | GLUD2            | 3,903389697  | 3,951219941  | -0,04783024 |  |
| 209669_s_at  | SERBP1           | 5,873122092  | 5,921034691  | -0,0479126  |  |
| 208750_s_at  | ARF1 /// MIR3620 | 4,663430187  | 4,711365298  | -0,04793511 |  |
| 209625_at    | PIGH             | 2,182996494  | 2,230931691  | -0,0479352  |  |
| 224097_s_at  | F11R             | 2,901063789  | 2,949006836  | -0,04794305 |  |
| 203628_at    | IGF1R            | 0,928678725  | 0,976641161  | -0,04796244 |  |
| 222735_at    | TMEM38B          | 3,798068007  | 3,846031735  | -0,04796373 |  |
| 222430_s_at  | YTHDF2           | 3,750808107  | 3,798818761  | -0,04801065 |  |
| 207945_s_at  | CSNK1D           | 2,314494121  | 2,362515214  | -0,04802109 |  |
| 201365_at    | OAZ2             | 1,81142822   | 1,859476797  | -0,04804858 |  |
| 202838_at    | FUCA1            | 3,202127528  | 3,250254796  | -0,04812727 |  |
| 221598_s_at  | MED27            | 2,472384965  | 2,520531219  | -0,04814625 |  |
| 202759_s_at  | AKAP2 /// PALM2  | 0,03125738   | 0,079428135  | -0,04817076 |  |
| 233833_at    | -                | 0,03125738   | 0,079428135  | -0,04817076 |  |
| 208956_x_at  | DUT              | 6,22371846   | 6,27190069   | -0,04818223 |  |
| 1552731_at   | ABRA             | -2,504600601 | -2,456406426 | -0,04819418 |  |
| 1554623_x_at | DGKE             | -2,504600601 | -2,456406426 | -0,04819418 |  |
| 1561088_at   | EYA4             | -2,504600601 | -2,456406426 | -0,04819418 |  |
| 1562139_a_at | FOXP2            | -2,504600601 | -2,456406426 | -0,04819418 |  |
| 1566080_at   | -                | -2,504600601 | -2,456406426 | -0,04819418 |  |
| 1566081_at   | DLEU7            | -2,504600601 | -2,456406426 | -0,04819418 |  |
| 1567076_at   | CLN6             | -2,504600601 | -2,456406426 | -0,04819418 |  |
| 204035_at    | SCG2             | -2,504600601 | -2,456406426 | -0,04819418 |  |
| 206143_at    | SLC26A3          | -2,504600601 | -2,456406426 | -0,04819418 |  |
| 207517_at    | LAMC2            | -2,504600601 | -2,456406426 | -0,04819418 |  |
| 208567_s_at  | KCNJ12 /// KCNJ  | -2,504600601 | -2,456406426 | -0,04819418 |  |
| 211365_s_at  | PCDHA2           | -2,504600601 | -2,456406426 | -0,04819418 |  |
| 213780_at    | TCHH             | -2,504600601 | -2,456406426 | -0,04819418 |  |
| 215355_at    | POU2F3           | -2,504600601 | -2,456406426 | -0,04819418 |  |
| 215448_at    | -                | -2,504600601 | -2,456406426 | -0,04819418 |  |
| 215679_at    | -                | -2,504600601 | -2,456406426 | -0,04819418 |  |
| 218468_s_at  | GREM1            | -2,504600601 | -2,456406426 | -0,04819418 |  |
| 220672_at    | PPP4R4           | -2,504600601 | -2,456406426 | -0,04819418 |  |
| 222364_at    | SLC44A1          | -2,504600601 | -2,456406426 | -0,04819418 |  |
| 224007_at    | HSFY1 /// HSFY2  | -2,504600601 | -2,456406426 | -0,04819418 |  |
| 224349_at    | -                | -2,504600601 | -2,456406426 | -0,04819418 |  |
| 228679_at    | -                | -2,504600601 | -2,456406426 | -0,04819418 |  |

|              |                 |              |              |             |  |
|--------------|-----------------|--------------|--------------|-------------|--|
| 231113_at    | -               | -2,504600601 | -2,456406426 | -0,04819418 |  |
| 232100_at    | RNF217          | -2,504600601 | -2,456406426 | -0,04819418 |  |
| 232377_at    | NXPH1           | -2,504600601 | -2,456406426 | -0,04819418 |  |
| 233932_at    | -               | -2,504600601 | -2,456406426 | -0,04819418 |  |
| 234202_at    | -               | -2,504600601 | -2,456406426 | -0,04819418 |  |
| 235213_at    | ITPKB           | -2,504600601 | -2,456406426 | -0,04819418 |  |
| 235876_at    | TMEM218         | -2,504600601 | -2,456406426 | -0,04819418 |  |
| 236419_at    | -               | -2,504600601 | -2,456406426 | -0,04819418 |  |
| 236884_at    | RIMKLA          | -2,504600601 | -2,456406426 | -0,04819418 |  |
| 237148_at    | -               | -2,504600601 | -2,456406426 | -0,04819418 |  |
| 237224_at    | PDZK1IP1-AS1    | -2,504600601 | -2,456406426 | -0,04819418 |  |
| 237278_x_at  | -               | -2,504600601 | -2,456406426 | -0,04819418 |  |
| 238018_at    | FAM150B         | -2,504600601 | -2,456406426 | -0,04819418 |  |
| 239420_at    | LOC100507267    | -2,504600601 | -2,456406426 | -0,04819418 |  |
| 241585_at    | LRRC4C          | -2,504600601 | -2,456406426 | -0,04819418 |  |
| 242000_at    | CASD1           | -2,504600601 | -2,456406426 | -0,04819418 |  |
| 242698_at    | AKAP14          | -2,504600601 | -2,456406426 | -0,04819418 |  |
| 244468_at    | PDZK1P1         | -2,504600601 | -2,456406426 | -0,04819418 |  |
| 244480_at    | -               | -2,504600601 | -2,456406426 | -0,04819418 |  |
| 204308_s_at  | TECPR2          | 2,030406107  | 2,078620836  | -0,04821473 |  |
| 212715_s_at  | MICAL3          | 1,129248302  | 1,177496821  | -0,04824852 |  |
| 40093_at     | BCAM            | 1,222273398  | 1,270526026  | -0,04825263 |  |
| 213677_s_at  | PMS1            | 3,176127502  | 3,22439681   | -0,04826931 |  |
| 222266_at    | -               | 4,849906533  | 4,898243211  | -0,04833668 |  |
| 224184_s_at  | BOC             | 0,541261317  | 0,589657387  | -0,04839607 |  |
| 244347_at    | -               | 0,541261317  | 0,589657387  | -0,04839607 |  |
| 212785_s_at  | LARP7           | 3,327680494  | 3,376085218  | -0,04840472 |  |
| 212825_at    | PAXIP1          | 3,628024221  | 3,67645448   | -0,04843026 |  |
| 201723_s_at  | GALNT1          | 4,64373014   | 4,692217481  | -0,04848734 |  |
| 212389_at    | SBF1            | -0,467091869 | -0,41858459  | -0,04850728 |  |
| 221022_s_at  | PMFBP1          | -0,467091869 | -0,41858459  | -0,04850728 |  |
| 221113_s_at  | WNT16           | -0,467091869 | -0,41858459  | -0,04850728 |  |
| 231429_at    | TRABD2A         | -0,467091869 | -0,41858459  | -0,04850728 |  |
| 215694_at    | SPATA5L1        | 0,67554678   | 0,724100169  | -0,04855339 |  |
| 228864_at    | ZNF653          | 0,67554678   | 0,724100169  | -0,04855339 |  |
| 209236_at    | SLC23A2         | 2,122398022  | 2,170981159  | -0,04858314 |  |
| 1557386_at   | LOC100507600    | -1,543331864 | -1,494668682 | -0,04866318 |  |
| 1563009_at   | LOC284930       | -1,543331864 | -1,494668682 | -0,04866318 |  |
| 206126_at    | CXCR5           | -1,543331864 | -1,494668682 | -0,04866318 |  |
| 212998_x_at  | HLA-DQB1 /// LO | -1,543331864 | -1,494668682 | -0,04866318 |  |
| 221996_s_at  | CLTB            | -1,543331864 | -1,494668682 | -0,04866318 |  |
| 231502_at    | -               | -1,543331864 | -1,494668682 | -0,04866318 |  |
| 233009_at    | -               | -1,543331864 | -1,494668682 | -0,04866318 |  |
| 233246_at    | -               | -1,543331864 | -1,494668682 | -0,04866318 |  |
| 235577_at    | ZNF652          | -1,543331864 | -1,494668682 | -0,04866318 |  |
| 235823_at    | ACSF3           | -1,543331864 | -1,494668682 | -0,04866318 |  |
| 237334_at    | -               | -1,543331864 | -1,494668682 | -0,04866318 |  |
| 238567_at    | SGPP2           | -1,543331864 | -1,494668682 | -0,04866318 |  |
| 239457_at    | ATP8B3          | -1,543331864 | -1,494668682 | -0,04866318 |  |
| 225257_at    | CCDC97          | 0,798390451  | 0,847075464  | -0,04868501 |  |
| 1554894_a_at | PCBD2           | 1,119359127  | 1,16809119   | -0,04873206 |  |
| 205896_at    | SLC22A4         | 1,381753566  | 1,43051703   | -0,04876346 |  |
| 214614_at    | MNX1            | 0,911589958  | 0,960386719  | -0,04879676 |  |
| 200873_s_at  | CCT8            | 7,08763516   | 7,136433494  | -0,04879833 |  |
| 206074_s_at  | HMGA1           | 4,541906488  | 4,590711136  | -0,04880465 |  |
| 215030_at    | GRSF1           | 1,210676994  | 1,259496994  | -0,04882    |  |

|              |                  |              |              |             |  |
|--------------|------------------|--------------|--------------|-------------|--|
| 236875_at    | LOC100130705     | 1,210676994  | 1,259496994  | -0,04882    |  |
| 229043_at    | PAPD5            | 2,635653293  | 2,684536601  | -0,04888331 |  |
| 222310_at    | SCAF4            | 1,732533761  | 1,781437557  | -0,0489038  |  |
| 233427_x_at  | -                | 1,732533761  | 1,781437557  | -0,0489038  |  |
| 205545_x_at  | DNAJC8           | 4,886443868  | 4,935446463  | -0,04900259 |  |
| 1554466_a_at | C16orf13         | 3,112743591  | 3,161800893  | -0,0490573  |  |
| 208992_s_at  | STAT3            | 4,767615283  | 4,816696246  | -0,04908096 |  |
| 209864_at    | FRAT2            | 3,158127685  | 3,207279726  | -0,04915204 |  |
| 224629_at    | LMAN1            | 5,547731219  | 5,596907736  | -0,04917652 |  |
| 202954_at    | UBE2C            | 6,41042397   | 6,459601753  | -0,04917778 |  |
| 212254_s_at  | DST /// LOC1006  | 2,109966786  | 2,159161028  | -0,04919424 |  |
| 201663_s_at  | SMC4             | 4,431347964  | 4,480569206  | -0,04922124 |  |
| 201524_x_at  | UBE2N            | 5,749141429  | 5,798376613  | -0,04923518 |  |
| 200809_x_at  | RPL12            | 7,609951293  | 7,659191145  | -0,04923985 |  |
| 225118_at    | SETD8            | 1,593009234  | 1,642321262  | -0,04931203 |  |
| 223363_at    | PSMG3            | 3,329826127  | 3,379145507  | -0,04931938 |  |
| 225421_at    | PM20D2           | 3,800390846  | 3,849713445  | -0,0493226  |  |
| 222843_at    | FIGNL1           | 3,5222335    | 3,571564634  | -0,04933113 |  |
| 1561626_at   | -                | 0,20027154   | 0,249604176  | -0,04933264 |  |
| 209556_at    | NCDN             | 0,20027154   | 0,249604176  | -0,04933264 |  |
| 214230_at    | CDC42            | 0,20027154   | 0,249604176  | -0,04933264 |  |
| 218975_at    | COL5A3           | 0,20027154   | 0,249604176  | -0,04933264 |  |
| 222222_s_at  | HOMER3           | 0,20027154   | 0,249604176  | -0,04933264 |  |
| 228666_at    | C15orf38         | 0,20027154   | 0,249604176  | -0,04933264 |  |
| 240170_at    | -                | 0,20027154   | 0,249604176  | -0,04933264 |  |
| 1553711_a_at | FAM218A          | -1,591296941 | -1,541908042 | -0,0493889  |  |
| 1555044_a_at | KBTBD5           | -1,591296941 | -1,541908042 | -0,0493889  |  |
| 1560770_at   | PABPC1           | -1,591296941 | -1,541908042 | -0,0493889  |  |
| 1561292_at   | -                | -1,591296941 | -1,541908042 | -0,0493889  |  |
| 1564280_x_at | LOC100133920     | -1,591296941 | -1,541908042 | -0,0493889  |  |
| 210091_s_at  | DTNA             | -1,591296941 | -1,541908042 | -0,0493889  |  |
| 210403_s_at  | KCNJ1            | -1,591296941 | -1,541908042 | -0,0493889  |  |
| 214269_at    | MFSD7            | -1,591296941 | -1,541908042 | -0,0493889  |  |
| 216400_at    | GBA /// GBAP1 // | -1,591296941 | -1,541908042 | -0,0493889  |  |
| 217507_at    | SLC11A1          | -1,591296941 | -1,541908042 | -0,0493889  |  |
| 220080_at    | FBXL8            | -1,591296941 | -1,541908042 | -0,0493889  |  |
| 220133_at    | ODAM             | -1,591296941 | -1,541908042 | -0,0493889  |  |
| 221468_at    | XCR1             | -1,591296941 | -1,541908042 | -0,0493889  |  |
| 224453_s_at  | ETNK1            | -1,591296941 | -1,541908042 | -0,0493889  |  |
| 227819_at    | LGR6             | -1,591296941 | -1,541908042 | -0,0493889  |  |
| 228176_at    | S1PR3            | -1,591296941 | -1,541908042 | -0,0493889  |  |
| 230181_at    | PQLC1            | -1,591296941 | -1,541908042 | -0,0493889  |  |
| 230210_at    | SUN1             | -1,591296941 | -1,541908042 | -0,0493889  |  |
| 230970_at    | -                | -1,591296941 | -1,541908042 | -0,0493889  |  |
| 238321_at    | TEAD2            | -1,591296941 | -1,541908042 | -0,0493889  |  |
| 239983_at    | SLC30A8          | -1,591296941 | -1,541908042 | -0,0493889  |  |
| 244848_at    | LOC100505794     | -1,591296941 | -1,541908042 | -0,0493889  |  |
| 223303_at    | FERMT3           | 3,556534813  | 3,605931378  | -0,04939657 |  |
| 227467_at    | RDH10            | 1,104397092  | 1,153866761  | -0,04946967 |  |
| 203277_at    | DFFA             | 2,623460554  | 2,672945617  | -0,04948506 |  |
| 222602_at    | UBA6             | 4,305625125  | 4,355114902  | -0,04948978 |  |
| 235248_at    | BTBD9            | 0,518867317  | 0,568365095  | -0,04949778 |  |
| 242256_x_at  | -                | 0,518867317  | 0,568365095  | -0,04949778 |  |
| 200610_s_at  | NCL              | 6,959080847  | 7,008590542  | -0,04950969 |  |
| 52169_at     | STRADA           | 2,951402536  | 3,000921341  | -0,0495188  |  |
| 208628_s_at  | YBX1             | 7,272654537  | 7,322206866  | -0,04955233 |  |

|             |          |              |              |             |  |
|-------------|----------|--------------|--------------|-------------|--|
| 204768_s_at | FEN1     | 3,880884266  | 3,930508802  | -0,04962454 |  |
| 201155_s_at | MFN2     | 2,808702036  | 2,858346012  | -0,04964398 |  |
| 208803_s_at | SRP72    | 3,684447666  | 3,734161076  | -0,04971341 |  |
| 201093_x_at | SDHA     | 3,947373951  | 3,997092735  | -0,04971878 |  |
| 209161_at   | PRPF4    | 4,258533314  | 4,308254202  | -0,04972089 |  |
| 1554309_at  | EIF4G3   | -2,384869671 | -2,335104118 | -0,04976555 |  |
| 1555675_at  | BLID     | -2,384869671 | -2,335104118 | -0,04976555 |  |
| 1555727_at  | -        | -2,384869671 | -2,335104118 | -0,04976555 |  |
| 1557829_at  | -        | -2,384869671 | -2,335104118 | -0,04976555 |  |
| 1561256_at  | -        | -2,384869671 | -2,335104118 | -0,04976555 |  |
| 1562718_at  | -        | -2,384869671 | -2,335104118 | -0,04976555 |  |
| 1563102_at  | -        | -2,384869671 | -2,335104118 | -0,04976555 |  |
| 1566201_at  | -        | -2,384869671 | -2,335104118 | -0,04976555 |  |
| 1567679_at  | SNORA74A | -2,384869671 | -2,335104118 | -0,04976555 |  |
| 1570587_at  | -        | -2,384869671 | -2,335104118 | -0,04976555 |  |
| 214345_at   | -        | -2,384869671 | -2,335104118 | -0,04976555 |  |
| 215830_at   | SHANK2   | -2,384869671 | -2,335104118 | -0,04976555 |  |
| 228170_at   | OLIG1    | -2,384869671 | -2,335104118 | -0,04976555 |  |
| 228344_s_at | TBX3     | -2,384869671 | -2,335104118 | -0,04976555 |  |
| 233147_at   | -        | -2,384869671 | -2,335104118 | -0,04976555 |  |
| 233579_at   | -        | -2,384869671 | -2,335104118 | -0,04976555 |  |
| 233902_at   | GUCA1C   | -2,384869671 | -2,335104118 | -0,04976555 |  |
| 234421_s_at | EVC      | -2,384869671 | -2,335104118 | -0,04976555 |  |
| 235187_s_at | -        | -2,384869671 | -2,335104118 | -0,04976555 |  |
| 239278_at   | -        | -2,384869671 | -2,335104118 | -0,04976555 |  |
| 239992_at   | -        | -2,384869671 | -2,335104118 | -0,04976555 |  |
| 241694_at   | PKHD1    | -2,384869671 | -2,335104118 | -0,04976555 |  |
| 242051_at   | -        | -2,384869671 | -2,335104118 | -0,04976555 |  |
| 244644_at   | FAM9C    | -2,384869671 | -2,335104118 | -0,04976555 |  |
| 205849_s_at | UQCRB    | 6,449983933  | 6,499755849  | -0,04977192 |  |
| 200085_s_at | TCEB2    | 5,870729341  | 5,920509647  | -0,04978031 |  |
| 204886_at   | PLK4     | 2,438982012  | 2,488772006  | -0,04978999 |  |
| 222527_s_at | RBM22    | 2,438982012  | 2,488772006  | -0,04978999 |  |
| 207657_x_at | TNPO1    | 4,097854871  | 4,147649355  | -0,04979448 |  |
| 225332_at   | OIP5-AS1 | 2,35929703   | 2,409170778  | -0,04987375 |  |
| 231914_at   | NUDT14   | 1,995690482  | 2,045615873  | -0,04992539 |  |
| 221250_s_at | MXD3     | 1,094335495  | 1,144305291  | -0,0499698  |  |
| 212342_at   | YIPF6    | 2,31665944   | 2,366632651  | -0,04997321 |  |
| 207390_s_at | SMTN     | 1,187200746  | 1,23718272   | -0,04998197 |  |
| 225357_s_at | INO80    | 1,187200746  | 1,23718272   | -0,04998197 |  |
| 200061_s_at | RPS24    | 7,837169329  | 7,887160562  | -0,04999123 |  |
| 217923_at   | PEF1     | 3,231115193  | 3,281121096  | -0,05000059 |  |
| 224405_at   | FCRL5    | -3,32387526  | -3,273861381 | -0,05001388 |  |
| 233703_x_at | -        | -3,32387526  | -3,273861381 | -0,05001388 |  |
| 239672_at   | -        | -3,32387526  | -3,273861381 | -0,05001388 |  |
| 244493_at   | GPR22    | -3,32387526  | -3,273861381 | -0,05001388 |  |
| 225119_at   | CHMP4B   | 2,771299138  | 2,821324225  | -0,05002509 |  |
| 204833_at   | ATG12    | 1,709647566  | 1,759685182  | -0,05003762 |  |
| 211037_s_at | MBOAT7   | 1,829737795  | 1,879785595  | -0,0500478  |  |
| 223276_at   | C5orf62  | 1,829737795  | 1,879785595  | -0,0500478  |  |
| 212892_at   | ZNF282   | 2,139623739  | 2,189694216  | -0,05007048 |  |
| 226179_at   | SLC25A37 | 4,515757928  | 4,565857693  | -0,05009977 |  |
| 218365_s_at | DARS2    | 2,708372067  | 2,758473378  | -0,05010131 |  |
| 207233_s_at | MITF     | 3,06588531   | 3,116064987  | -0,05017968 |  |
| 212550_at   | STAT5B   | 1,504602299  | 1,55481039   | -0,05020809 |  |
| 225582_at   | ITPRIP   | 1,504602299  | 1,55481039   | -0,05020809 |  |

|              |                 |              |              |             |  |
|--------------|-----------------|--------------|--------------|-------------|--|
| 219582_at    | OGFRL1          | 0,882651021  | 0,932882274  | -0,05023125 |  |
| 222851_at    | ZNF654          | 0,767063567  | 0,817300337  | -0,05023677 |  |
| 232693_s_at  | FBXO16 /// ZNF3 | 0,767063567  | 0,817300337  | -0,05023677 |  |
| 1557384_at   | LOC100506639 /  | 0,641402394  | 0,691645685  | -0,05024329 |  |
| 242918_at    | NASP            | 0,641402394  | 0,691645685  | -0,05024329 |  |
| 200678_x_at  | GRN             | 3,503346991  | 3,553617909  | -0,05027092 |  |
| 209313_at    | GPN1            | 4,099113343  | 4,149442805  | -0,05032946 |  |
| 217881_s_at  | CDC27           | 2,671625168  | 2,721978587  | -0,05035342 |  |
| 230795_at    | -               | 3,408067074  | 3,458446747  | -0,05037967 |  |
| 202223_at    | STT3A           | 4,482873466  | 4,533260944  | -0,05038748 |  |
| 218272_at    | TTC38           | 1,348276312  | 1,398700978  | -0,05042467 |  |
| 204528_s_at  | NAP1L1          | 5,131831158  | 5,182291778  | -0,05046062 |  |
| 202746_at    | ITM2A           | 4,61190412   | 4,662382761  | -0,05047864 |  |
| 200895_s_at  | FKBP4           | 4,918162443  | 4,96867023   | -0,05050779 |  |
| 227836_at    | UTP23           | 4,094703882  | 4,145254615  | -0,05055073 |  |
| 212535_at    | MEF2A           | 2,600539826  | 2,651169275  | -0,05062945 |  |
| 1559522_at   | LOC100505918    | -0,512251684 | -0,461594427 | -0,05065726 |  |
| 222860_s_at  | PDGFD           | -0,512251684 | -0,461594427 | -0,05065726 |  |
| 234127_at    | -               | -0,512251684 | -0,461594427 | -0,05065726 |  |
| 218718_at    | PDGFC           | 4,830716841  | 4,88143537   | -0,05071853 |  |
| 208613_s_at  | FLNB            | 2,342392905  | 2,39311332   | -0,05072041 |  |
| 206106_at    | MAPK12          | 1,079110292  | 1,129843209  | -0,05073292 |  |
| 236706_at    | LYG1            | 1,079110292  | 1,129843209  | -0,05073292 |  |
| 202378_s_at  | LEPROT          | 3,456984333  | 3,507749374  | -0,05076504 |  |
| 32811_at     | MYO1C           | 2,21585184   | 2,26662315   | -0,05077131 |  |
| 217967_s_at  | FAM129A         | 1,493160564  | 1,543943227  | -0,05078266 |  |
| 223031_s_at  | TRAF7           | 1,493160564  | 1,543943227  | -0,05078266 |  |
| 235531_at    | -               | 1,493160564  | 1,543943227  | -0,05078266 |  |
| 1553372_at   | -               | -1,71423189  | -1,663414495 | -0,0508174  |  |
| 1553410_a_at | ABCC12          | -1,71423189  | -1,663414495 | -0,0508174  |  |
| 1553537_at   | KRT73           | -1,71423189  | -1,663414495 | -0,0508174  |  |
| 1555441_at   | UBA6            | -1,71423189  | -1,663414495 | -0,0508174  |  |
| 1555545_at   | KLK2            | -1,71423189  | -1,663414495 | -0,0508174  |  |
| 1556057_s_at | NEUROD1         | -1,71423189  | -1,663414495 | -0,0508174  |  |
| 1556097_at   | HOMER2          | -1,71423189  | -1,663414495 | -0,0508174  |  |
| 1558577_at   | LOC148709       | -1,71423189  | -1,663414495 | -0,0508174  |  |
| 1569444_at   | -               | -1,71423189  | -1,663414495 | -0,0508174  |  |
| 1570035_at   | TBC1D10A        | -1,71423189  | -1,663414495 | -0,0508174  |  |
| 204062_s_at  | ULK2            | -1,71423189  | -1,663414495 | -0,0508174  |  |
| 207075_at    | NLRP3           | -1,71423189  | -1,663414495 | -0,0508174  |  |
| 207201_s_at  | SLC22A1         | -1,71423189  | -1,663414495 | -0,0508174  |  |
| 207653_at    | FOXD2           | -1,71423189  | -1,663414495 | -0,0508174  |  |
| 208156_x_at  | EPPK1           | -1,71423189  | -1,663414495 | -0,0508174  |  |
| 210253_at    | HTATIP2         | -1,71423189  | -1,663414495 | -0,0508174  |  |
| 222773_s_at  | GALNT12         | -1,71423189  | -1,663414495 | -0,0508174  |  |
| 222829_s_at  | IL20RA          | -1,71423189  | -1,663414495 | -0,0508174  |  |
| 231197_at    | PPP1R3F         | -1,71423189  | -1,663414495 | -0,0508174  |  |
| 232707_at    | ISX             | -1,71423189  | -1,663414495 | -0,0508174  |  |
| 234429_at    | LINC00476       | -1,71423189  | -1,663414495 | -0,0508174  |  |
| 234856_at    | -               | -1,71423189  | -1,663414495 | -0,0508174  |  |
| 235816_s_at  | RGL4            | -1,71423189  | -1,663414495 | -0,0508174  |  |
| 235965_at    | -               | -1,71423189  | -1,663414495 | -0,0508174  |  |
| 236211_at    | RAB40B          | -1,71423189  | -1,663414495 | -0,0508174  |  |
| 237710_at    | -               | -1,71423189  | -1,663414495 | -0,0508174  |  |
| 238439_at    | ANKRD22         | -1,71423189  | -1,663414495 | -0,0508174  |  |
| 239736_at    | -               | -1,71423189  | -1,663414495 | -0,0508174  |  |



|              |                  |              |              |             |  |
|--------------|------------------|--------------|--------------|-------------|--|
| 243063_at    | -                | -1,71423189  | -1,663414495 | -0,0508174  |  |
| 1557000_at   | ESPNL            | 0,87091093   | 0,921731975  | -0,05082105 |  |
| 232937_at    | -                | 0,87091093   | 0,921731975  | -0,05082105 |  |
| 216903_s_at  | MICU1            | 2,755423794  | 2,806245339  | -0,05082155 |  |
| 219273_at    | CCNK             | -0,022466681 | 0,028364014  | -0,05083069 |  |
| 1553338_at   | SDE2             | 1,339784194  | 1,390636111  | -0,05085192 |  |
| 223175_s_at  | FEM1A            | 2,027765132  | 2,078620836  | -0,0508557  |  |
| 1553006_at   | GPR112           | -2,262747984 | -2,211750327 | -0,05099766 |  |
| 1553020_at   | SMCR5            | -2,262747984 | -2,211750327 | -0,05099766 |  |
| 1558320_at   | -                | -2,262747984 | -2,211750327 | -0,05099766 |  |
| 1561473_at   | -                | -2,262747984 | -2,211750327 | -0,05099766 |  |
| 1562142_at   | SKIV2L2          | -2,262747984 | -2,211750327 | -0,05099766 |  |
| 1562747_at   | -                | -2,262747984 | -2,211750327 | -0,05099766 |  |
| 1569099_at   | -                | -2,262747984 | -2,211750327 | -0,05099766 |  |
| 1569476_at   | DKFZP434L187     | -2,262747984 | -2,211750327 | -0,05099766 |  |
| 1569748_at   | PRKCZ            | -2,262747984 | -2,211750327 | -0,05099766 |  |
| 1570639_at   | -                | -2,262747984 | -2,211750327 | -0,05099766 |  |
| 208413_at    | RARB             | -2,262747984 | -2,211750327 | -0,05099766 |  |
| 216106_at    | LOC145678        | -2,262747984 | -2,211750327 | -0,05099766 |  |
| 217406_at    | -                | -2,262747984 | -2,211750327 | -0,05099766 |  |
| 219685_at    | TMEM35           | -2,262747984 | -2,211750327 | -0,05099766 |  |
| 226235_at    | LOC339290        | -2,262747984 | -2,211750327 | -0,05099766 |  |
| 230404_at    | C5orf63          | -2,262747984 | -2,211750327 | -0,05099766 |  |
| 232339_at    | DCAF8            | -2,262747984 | -2,211750327 | -0,05099766 |  |
| 234821_at    | -                | -2,262747984 | -2,211750327 | -0,05099766 |  |
| 237240_at    | -                | -2,262747984 | -2,211750327 | -0,05099766 |  |
| 237508_at    | -                | -2,262747984 | -2,211750327 | -0,05099766 |  |
| 238967_at    | -                | -2,262747984 | -2,211750327 | -0,05099766 |  |
| 243239_at    | SAMM50           | -2,262747984 | -2,211750327 | -0,05099766 |  |
| 243244_at    | CACNB4           | -2,262747984 | -2,211750327 | -0,05099766 |  |
| 243610_at    | C9orf135         | -2,262747984 | -2,211750327 | -0,05099766 |  |
| 244323_at    | BHLHE22          | -2,262747984 | -2,211750327 | -0,05099766 |  |
| 1553266_at   | CNOT6L           | -3,287237186 | -3,236070201 | -0,05116698 |  |
| 1556439_at   | -                | -3,287237186 | -3,236070201 | -0,05116698 |  |
| 1560202_at   | LOC338739        | -3,287237186 | -3,236070201 | -0,05116698 |  |
| 1561415_at   | -                | -3,287237186 | -3,236070201 | -0,05116698 |  |
| 1562876_s_at | LOC541471        | -3,287237186 | -3,236070201 | -0,05116698 |  |
| 219777_at    | GIMAP6           | -3,287237186 | -3,236070201 | -0,05116698 |  |
| 232068_s_at  | TLR4             | -3,287237186 | -3,236070201 | -0,05116698 |  |
| 233683_at    | -                | -3,287237186 | -3,236070201 | -0,05116698 |  |
| 237205_at    | LINC00238        | -3,287237186 | -3,236070201 | -0,05116698 |  |
| 244048_x_at  | -                | -3,287237186 | -3,236070201 | -0,05116698 |  |
| 225360_at    | TRABD            | 1,485482016  | 1,536652708  | -0,05117069 |  |
| 219494_at    | FSBP /// RAD54B  | 2,654607516  | 2,705818724  | -0,05121121 |  |
| 227309_at    | YOD1             | 4,937286399  | 4,988510537  | -0,05122414 |  |
| 211704_s_at  | SPIN2A /// SPIN2 | 2,371846398  | 2,423075926  | -0,05122953 |  |
| 224365_s_at  | TIGD7            | 2,371846398  | 2,423075926  | -0,05122953 |  |
| 217919_s_at  | MRPL42           | 5,288690404  | 5,339940575  | -0,05125017 |  |
| 212481_s_at  | TPM4             | 4,216825331  | 4,268097973  | -0,05127264 |  |
| 201303_at    | EIF4A3           | 5,326251555  | 5,377534255  | -0,0512827  |  |
| 200999_s_at  | CKAP4            | 3,860992571  | 3,912315453  | -0,05132288 |  |
| 1559946_s_at | RUVBL2           | 5,894480128  | 5,945842734  | -0,05136261 |  |
| 200754_x_at  | SRSF2            | 6,131250963  | 6,182616774  | -0,05136581 |  |
| 200071_at    | SMNDC1           | 4,973418425  | 5,0247878    | -0,05136938 |  |
| 1552612_at   | CDC42SE2         | 1,683039483  | 1,73441697   | -0,05137749 |  |
| 223940_x_at  | LOC100507645 /   | 2,516380342  | 2,567790814  | -0,05141047 |  |

|              |                  |              |              |             |  |
|--------------|------------------|--------------|--------------|-------------|--|
| 206520_x_at  | SIGLEC6          | 0,480753764  | 0,532164371  | -0,05141061 |  |
| 236431_at    | U2SURP           | 0,480753764  | 0,532164371  | -0,05141061 |  |
| 239409_at    | -                | 0,480753764  | 0,532164371  | -0,05141061 |  |
| 218893_at    | ISOC2            | 3,831009889  | 3,882432751  | -0,05142286 |  |
| 208180_s_at  | HIST1H4A /// HIS | 4,743272317  | 4,794709145  | -0,05143683 |  |
| 213065_at    | ZFC3H1           | 3,088871381  | 3,140317145  | -0,05144576 |  |
| 201198_s_at  | PSMD1            | 4,123436638  | 4,174906896  | -0,05147026 |  |
| 221845_s_at  | CLPB             | 1,326951551  | 1,378453643  | -0,05150209 |  |
| 223423_at    | GPR160           | 1,063722698  | 1,115234684  | -0,05151199 |  |
| 212946_at    | KIAA0564         | 2,014487247  | 2,066015817  | -0,05152857 |  |
| 219662_at    | C2orf49          | 2,680059304  | 2,731588328  | -0,05152902 |  |
| 236649_at    | DTWD1            | 0,962260738  | 1,013870809  | -0,05161007 |  |
| 226748_at    | LYSMD2           | 3,284083774  | 3,335699198  | -0,05161542 |  |
| 209174_s_at  | QRICH1           | 3,363729238  | 3,415371412  | -0,05164217 |  |
| 219715_s_at  | TDP1             | 3,363729238  | 3,415371412  | -0,05164217 |  |
| 200783_s_at  | STMN1            | 3,493810203  | 3,545468469  | -0,05165827 |  |
| 225811_at    | C11orf58         | 2,400710591  | 2,452428893  | -0,05171183 |  |
| 228286_at    | GEN1             | 1,67631007   | 1,728030156  | -0,05172009 |  |
| 229100_s_at  | TIMM22           | 1,67631007   | 1,728030156  | -0,05172009 |  |
| 1557349_at   | RERE             | -1,838812296 | -1,787089803 | -0,05172249 |  |
| 1557446_x_at | TREML3P          | -1,838812296 | -1,787089803 | -0,05172249 |  |
| 1560524_at   | GRAPL            | -1,838812296 | -1,787089803 | -0,05172249 |  |
| 1562057_at   | -                | -1,838812296 | -1,787089803 | -0,05172249 |  |
| 1566948_at   | -                | -1,838812296 | -1,787089803 | -0,05172249 |  |
| 206304_at    | MYBPH            | -1,838812296 | -1,787089803 | -0,05172249 |  |
| 209966_x_at  | ESRRG            | -1,838812296 | -1,787089803 | -0,05172249 |  |
| 217130_at    | -                | -1,838812296 | -1,787089803 | -0,05172249 |  |
| 217304_at    | SHMT1            | -1,838812296 | -1,787089803 | -0,05172249 |  |
| 226028_at    | ROBO4            | -1,838812296 | -1,787089803 | -0,05172249 |  |
| 228184_at    | DISP1            | -1,838812296 | -1,787089803 | -0,05172249 |  |
| 229656_s_at  | EML6             | -1,838812296 | -1,787089803 | -0,05172249 |  |
| 231418_at    | MS4A1            | -1,838812296 | -1,787089803 | -0,05172249 |  |
| 232492_at    | BVES-AS1         | -1,838812296 | -1,787089803 | -0,05172249 |  |
| 234607_at    | ARRDC1           | -1,838812296 | -1,787089803 | -0,05172249 |  |
| 236048_at    | LHFPL1           | -1,838812296 | -1,787089803 | -0,05172249 |  |
| 236223_s_at  | RIT1             | -1,838812296 | -1,787089803 | -0,05172249 |  |
| 239874_at    | PDE8A            | -1,838812296 | -1,787089803 | -0,05172249 |  |
| 240805_at    | -                | -1,838812296 | -1,787089803 | -0,05172249 |  |
| 241641_at    | -                | -1,838812296 | -1,787089803 | -0,05172249 |  |
| 241646_s_at  | BCAP29           | -1,838812296 | -1,787089803 | -0,05172249 |  |
| 242183_at    | IRGQ             | -1,838812296 | -1,787089803 | -0,05172249 |  |
| 243461_at    | -                | -1,838812296 | -1,787089803 | -0,05172249 |  |
| 244242_at    | -                | -1,838812296 | -1,787089803 | -0,05172249 |  |
| 207590_s_at  | CENPI            | 0,853119696  | 0,904843258  | -0,05172356 |  |
| 219359_at    | ATHL1            | 0,152582607  | 0,204310755  | -0,05172815 |  |
| 219398_at    | CIDEC            | 0,152582607  | 0,204310755  | -0,05172815 |  |
| 229312_s_at  | GKAP1            | 0,152582607  | 0,204310755  | -0,05172815 |  |
| 238102_s_at  | BTBD19           | 0,152582607  | 0,204310755  | -0,05172815 |  |
| 229891_x_at  | KIAA1704         | 2,796341835  | 2,848075314  | -0,05173348 |  |
| 227994_x_at  | PPDPF            | 3,082523011  | 3,134292219  | -0,05176921 |  |
| 212801_at    | CIT /// MIR1178  | 2,436992838  | 2,488772006  | -0,05177917 |  |
| 204355_at    | DHX30            | 2,675004741  | 2,726791458  | -0,05178672 |  |
| 1553389_at   | NPHP3            | -2,138804305 | -2,086984744 | -0,05181956 |  |
| 1554311_a_at | SUPT6H           | -2,138804305 | -2,086984744 | -0,05181956 |  |
| 1555397_at   | MYO1D            | -2,138804305 | -2,086984744 | -0,05181956 |  |
| 1556617_a_at | LSAMP-AS4        | -2,138804305 | -2,086984744 | -0,05181956 |  |

|              |                |              |              |             |  |
|--------------|----------------|--------------|--------------|-------------|--|
| 1557553_at   | PPP1R12B       | -2,138804305 | -2,086984744 | -0,05181956 |  |
| 1557991_at   | METTL6         | -2,138804305 | -2,086984744 | -0,05181956 |  |
| 1564654_at   | -              | -2,138804305 | -2,086984744 | -0,05181956 |  |
| 215410_at    | LOC100132832 / | -2,138804305 | -2,086984744 | -0,05181956 |  |
| 217238_s_at  | ALDOB          | -2,138804305 | -2,086984744 | -0,05181956 |  |
| 222023_at    | AKAP13         | -2,138804305 | -2,086984744 | -0,05181956 |  |
| 230482_at    | ST6GALNAC5     | -2,138804305 | -2,086984744 | -0,05181956 |  |
| 230551_at    | KSR2           | -2,138804305 | -2,086984744 | -0,05181956 |  |
| 233716_at    | -              | -2,138804305 | -2,086984744 | -0,05181956 |  |
| 234759_at    | LOC100287497 / | -2,138804305 | -2,086984744 | -0,05181956 |  |
| 235945_at    | SRD5A2         | -2,138804305 | -2,086984744 | -0,05181956 |  |
| 236422_at    | -              | -2,138804305 | -2,086984744 | -0,05181956 |  |
| 237201_at    | -              | -2,138804305 | -2,086984744 | -0,05181956 |  |
| 239542_at    | ITPR3          | -2,138804305 | -2,086984744 | -0,05181956 |  |
| 239968_at    | LINC00313      | -2,138804305 | -2,086984744 | -0,05181956 |  |
| 241530_at    | -              | -2,138804305 | -2,086984744 | -0,05181956 |  |
| 241598_at    | NUDT10         | -2,138804305 | -2,086984744 | -0,05181956 |  |
| 242036_x_at  | ATP2B3         | -2,138804305 | -2,086984744 | -0,05181956 |  |
| 243049_at    | -              | -2,138804305 | -2,086984744 | -0,05181956 |  |
| 243903_at    | -              | -2,138804305 | -2,086984744 | -0,05181956 |  |
| 244748_at    | -              | -2,138804305 | -2,086984744 | -0,05181956 |  |
| 226463_at    | ATP6V1C1       | 3,704430214  | 3,756298754  | -0,05186854 |  |
| 228970_at    | ZBTB8OS        | 3,657366303  | 3,709248632  | -0,05188233 |  |
| 1552278_a_at | SLC46A1        | -2,089474779 | -2,037551727 | -0,05192305 |  |
| 1553211_at   | ANKFN1         | -2,089474779 | -2,037551727 | -0,05192305 |  |
| 1554495_s_at | MTHFSD         | -2,089474779 | -2,037551727 | -0,05192305 |  |
| 1554801_at   | FNDC9          | -2,089474779 | -2,037551727 | -0,05192305 |  |
| 1556989_at   | -              | -2,089474779 | -2,037551727 | -0,05192305 |  |
| 1558122_s_at | CSRNP3         | -2,089474779 | -2,037551727 | -0,05192305 |  |
| 1569418_at   | -              | -2,089474779 | -2,037551727 | -0,05192305 |  |
| 206988_at    | CCL25          | -2,089474779 | -2,037551727 | -0,05192305 |  |
| 210471_s_at  | KCNAB1         | -2,089474779 | -2,037551727 | -0,05192305 |  |
| 210571_s_at  | CMAHP          | -2,089474779 | -2,037551727 | -0,05192305 |  |
| 212909_at    | LYPD1          | -2,089474779 | -2,037551727 | -0,05192305 |  |
| 215656_at    | LMAN2          | -2,089474779 | -2,037551727 | -0,05192305 |  |
| 216772_at    | -              | -2,089474779 | -2,037551727 | -0,05192305 |  |
| 217335_at    | FLJ11292       | -2,089474779 | -2,037551727 | -0,05192305 |  |
| 220194_at    | NSUN7          | -2,089474779 | -2,037551727 | -0,05192305 |  |
| 221795_at    | NTRK2          | -2,089474779 | -2,037551727 | -0,05192305 |  |
| 223893_at    | ENAM           | -2,089474779 | -2,037551727 | -0,05192305 |  |
| 226172_at    | USP42          | -2,089474779 | -2,037551727 | -0,05192305 |  |
| 230722_at    | BNC2           | -2,089474779 | -2,037551727 | -0,05192305 |  |
| 231805_at    | PRLHR          | -2,089474779 | -2,037551727 | -0,05192305 |  |
| 235065_at    | FAM59A         | -2,089474779 | -2,037551727 | -0,05192305 |  |
| 240396_at    | -              | -2,089474779 | -2,037551727 | -0,05192305 |  |
| 240710_at    | -              | -2,089474779 | -2,037551727 | -0,05192305 |  |
| 241104_at    | -              | -2,089474779 | -2,037551727 | -0,05192305 |  |
| 241232_x_at  | -              | -2,089474779 | -2,037551727 | -0,05192305 |  |
| 242342_at    | GUCY1A2        | -2,089474779 | -2,037551727 | -0,05192305 |  |
| 244036_at    | -              | -2,089474779 | -2,037551727 | -0,05192305 |  |
| 244089_at    | -              | -2,089474779 | -2,037551727 | -0,05192305 |  |
| 37872_at     | JRK            | 0,672168477  | 0,724100169  | -0,05193169 |  |
| 204255_s_at  | VDR            | 0,606430281  | 0,658444279  | -0,052014   |  |
| 225263_at    | HS6ST1         | 0,606430281  | 0,658444279  | -0,052014   |  |
| 1553300_a_at | DGKH           | -1,964176657 | -1,912089812 | -0,05208684 |  |
| 1554633_a_at | MYT1L          | -1,964176657 | -1,912089812 | -0,05208684 |  |

|              |                  |              |              |             |  |
|--------------|------------------|--------------|--------------|-------------|--|
| 1562939_at   | LRRC16A          | -1,964176657 | -1,912089812 | -0,05208684 |  |
| 1566195_at   | -                | -1,964176657 | -1,912089812 | -0,05208684 |  |
| 1566964_at   | -                | -1,964176657 | -1,912089812 | -0,05208684 |  |
| 205856_at    | SLC14A1          | -1,964176657 | -1,912089812 | -0,05208684 |  |
| 210429_at    | RHD              | -1,964176657 | -1,912089812 | -0,05208684 |  |
| 220512_at    | DLC1             | -1,964176657 | -1,912089812 | -0,05208684 |  |
| 221625_at    | -                | -1,964176657 | -1,912089812 | -0,05208684 |  |
| 221852_at    | -                | -1,964176657 | -1,912089812 | -0,05208684 |  |
| 230594_at    | -                | -1,964176657 | -1,912089812 | -0,05208684 |  |
| 234806_at    | ORF1             | -1,964176657 | -1,912089812 | -0,05208684 |  |
| 236096_at    | SIPA1L3          | -1,964176657 | -1,912089812 | -0,05208684 |  |
| 237315_at    | -                | -1,964176657 | -1,912089812 | -0,05208684 |  |
| 237711_at    | ZNF705G          | -1,964176657 | -1,912089812 | -0,05208684 |  |
| 238734_at    | -                | -1,964176657 | -1,912089812 | -0,05208684 |  |
| 241248_at    | -                | -1,964176657 | -1,912089812 | -0,05208684 |  |
| 243130_at    | -                | -1,964176657 | -1,912089812 | -0,05208684 |  |
| 206592_s_at  | AP3D1            | 4,810884483  | 4,862972786  | -0,0520883  |  |
| 209027_s_at  | ABI1             | 3,81731168   | 3,869433939  | -0,05212226 |  |
| 1554683_a_at | MGC50722         | -0,543051993 | -0,490927335 | -0,05212466 |  |
| 1563744_a_at | DISC1            | -0,543051993 | -0,490927335 | -0,05212466 |  |
| 1568828_at   | LOC730441        | -0,543051993 | -0,490927335 | -0,05212466 |  |
| 202688_at    | TNFSF10          | -0,543051993 | -0,490927335 | -0,05212466 |  |
| 210100_s_at  | ABCA2            | -0,543051993 | -0,490927335 | -0,05212466 |  |
| 214646_at    | HIST1H3A /// HIS | -0,543051993 | -0,490927335 | -0,05212466 |  |
| 218764_at    | PRKCH            | -0,543051993 | -0,490927335 | -0,05212466 |  |
| 220139_at    | DNMT3L           | -0,543051993 | -0,490927335 | -0,05212466 |  |
| 234484_s_at  | ACSS1            | -0,543051993 | -0,490927335 | -0,05212466 |  |
| 234711_s_at  | BCORL1           | -0,543051993 | -0,490927335 | -0,05212466 |  |
| 241020_at    | -                | -0,543051993 | -0,490927335 | -0,05212466 |  |
| 227203_at    | FBXL17           | 1,46610492   | 1,518263577  | -0,05215866 |  |
| 1553066_at   | TAAR9            | -2,01371626  | -1,961547147 | -0,05216911 |  |
| 1555230_a_at | KCNIP2           | -2,01371626  | -1,961547147 | -0,05216911 |  |
| 1561492_at   | LOC647107        | -2,01371626  | -1,961547147 | -0,05216911 |  |
| 1562598_at   | LOC100128292     | -2,01371626  | -1,961547147 | -0,05216911 |  |
| 1563993_at   | -                | -2,01371626  | -1,961547147 | -0,05216911 |  |
| 1569843_at   | DYNC1I1          | -2,01371626  | -1,961547147 | -0,05216911 |  |
| 205576_at    | SERPIND1         | -2,01371626  | -1,961547147 | -0,05216911 |  |
| 205960_at    | PDK4             | -2,01371626  | -1,961547147 | -0,05216911 |  |
| 207777_s_at  | SP140            | -2,01371626  | -1,961547147 | -0,05216911 |  |
| 215129_at    | PIK3C2G          | -2,01371626  | -1,961547147 | -0,05216911 |  |
| 216445_at    | -                | -2,01371626  | -1,961547147 | -0,05216911 |  |
| 216673_at    | TTY1 /// TTTY1   | -2,01371626  | -1,961547147 | -0,05216911 |  |
| 222102_at    | GSTA3            | -2,01371626  | -1,961547147 | -0,05216911 |  |
| 223631_s_at  | C19orf33         | -2,01371626  | -1,961547147 | -0,05216911 |  |
| 230148_at    | AHSA2            | -2,01371626  | -1,961547147 | -0,05216911 |  |
| 231031_at    | KGFLP2           | -2,01371626  | -1,961547147 | -0,05216911 |  |
| 232747_at    | -                | -2,01371626  | -1,961547147 | -0,05216911 |  |
| 236120_at    | -                | -2,01371626  | -1,961547147 | -0,05216911 |  |
| 237416_at    | -                | -2,01371626  | -1,961547147 | -0,05216911 |  |
| 238840_at    | LRRFIP1          | -2,01371626  | -1,961547147 | -0,05216911 |  |
| 241027_at    | OPA1             | -2,01371626  | -1,961547147 | -0,05216911 |  |
| 243868_at    | RFX3             | -2,01371626  | -1,961547147 | -0,05216911 |  |
| 220841_s_at  | AHI1             | 0,46522187   | 0,51742585   | -0,05220398 |  |
| 209124_at    | MYD88            | 4,097225224  | 4,149442805  | -0,05221758 |  |
| 209363_s_at  | MED21            | 1,897847661  | 1,950068772  | -0,05222111 |  |
| 235434_at    | -                | 1,897847661  | 1,950068772  | -0,05222111 |  |

|              |                |              |              |             |  |
|--------------|----------------|--------------|--------------|-------------|--|
| 208066_s_at  | GTF2B          | 4,108517049  | 4,160749839  | -0,05223279 |  |
| 227045_at    | ZNF614         | 3,270743649  | 3,323041804  | -0,05229815 |  |
| 232209_x_at  | HM13           | 1,841816345  | 1,894118818  | -0,05230247 |  |
| 203817_at    | GUCY1B3        | 2,094906514  | 2,147243253  | -0,05233674 |  |
| 203280_at    | SAFB2          | 0,841135803  | 0,893473268  | -0,05233746 |  |
| 202867_s_at  | DNAJB12        | 1,139070151  | 1,191491281  | -0,05242113 |  |
| 200619_at    | SF3B2          | 4,020928202  | 4,073389758  | -0,05246156 |  |
| 210101_x_at  | SH3GLB1        | 4,538199871  | 4,590711136  | -0,05251127 |  |
| 209247_s_at  | ABCF2          | 3,223057183  | 3,275657468  | -0,05260028 |  |
| 209997_x_at  | PCM1           | 1,305306849  | 1,3579181    | -0,05261125 |  |
| 209698_at    | CCHCR1         | 1,835789711  | 1,888402606  | -0,05261289 |  |
| 222753_s_at  | SPCS3          | 2,967339888  | 3,019999252  | -0,05265936 |  |
| 221189_s_at  | TARS2          | 2,178241192  | 2,230931691  | -0,0526905  |  |
| 216834_at    | RGS1           | 1,940595304  | 1,993317152  | -0,05272185 |  |
| 206332_s_at  | IFI16          | 2,261526912  | 2,314300277  | -0,05277337 |  |
| 36865_at     | ANGEL1         | 1,775671768  | 1,828467288  | -0,05279552 |  |
| 220642_x_at  | GPR89A /// GPR | 3,775418946  | 3,828227545  | -0,0528086  |  |
| 212359_s_at  | KIAA0913       | 2,038300149  | 2,091116676  | -0,05281653 |  |
| 228630_at    | ZNF84          | 2,038300149  | 2,091116676  | -0,05281653 |  |
| 214239_x_at  | PCGF2          | 3,085065712  | 3,137910193  | -0,05284448 |  |
| 233803_s_at  | MYBBP1A        | 1,037706275  | 1,090553537  | -0,05284726 |  |
| 201440_at    | DDX23          | 2,218170265  | 2,271023131  | -0,05285287 |  |
| 235689_at    | MTFMT          | 1,774096855  | 1,826973888  | -0,05287703 |  |
| 218719_s_at  | GINS3          | 3,572931593  | 3,625821706  | -0,05289011 |  |
| 229859_at    | -              | 1,883312263  | 1,936283387  | -0,05297112 |  |
| 223445_at    | DTNBP1         | 3,193905507  | 3,246908183  | -0,05300268 |  |
| 219216_at    | ETAA1          | 0,934330293  | 0,987376598  | -0,0530463  |  |
| 200792_at    | XRCC6          | 6,275215746  | 6,32827431   | -0,05305856 |  |
| 227473_at    | CTTN           | 1,296557217  | 1,349621332  | -0,05306411 |  |
| 230008_at    | THSD7A         | 1,296557217  | 1,349621332  | -0,05306411 |  |
| 220948_s_at  | ATP1A1         | 3,552865637  | 3,605931378  | -0,05306574 |  |
| 207132_x_at  | PFDN5          | 5,429404826  | 5,482521288  | -0,05311646 |  |
| 226714_at    | SAMD4B         | 1,649074067  | 1,702196344  | -0,05312228 |  |
| 201731_s_at  | TPR            | 3,866915053  | 3,920040657  | -0,0531256  |  |
| 218733_at    | MSL2           | 2,710020346  | 2,763166224  | -0,05314588 |  |
| 225294_s_at  | TRAPPC1        | 1,446464021  | 1,499637023  | -0,053173   |  |
| 209452_s_at  | VTI1B          | 4,760872359  | 4,814060342  | -0,05318798 |  |
| 209622_at    | STK16          | 1,767779954  | 1,820984782  | -0,05320483 |  |
| 1553216_at   | ZNF41          | 0,123193849  | 0,176436073  | -0,05324222 |  |
| 207270_x_at  | CD300C         | 0,123193849  | 0,176436073  | -0,05324222 |  |
| 224128_at    | C20orf43       | 0,123193849  | 0,176436073  | -0,05324222 |  |
| 1558330_x_at | TONSL          | 0,822971223  | 0,876248481  | -0,05327726 |  |
| 205201_at    | GLI3           | 0,822971223  | 0,876248481  | -0,05327726 |  |
| 223264_at    | MESDC1         | 3,479385765  | 3,532699346  | -0,05331358 |  |
| 222411_s_at  | SSR3           | 5,182279401  | 5,235606017  | -0,05332662 |  |
| 209398_at    | HIST1H1C       | 6,732332455  | 6,785721484  | -0,05338903 |  |
| 216956_s_at  | ITGA2B         | 0,44160593   | 0,495031851  | -0,05342592 |  |
| 242669_at    | UFM1           | 1,578645857  | 1,632095957  | -0,0534501  |  |
| 226905_at    | FAM101B        | 4,618062399  | 4,671564559  | -0,05350216 |  |
| 230229_at    | DLG1           | 0,702292136  | 0,755840599  | -0,05354846 |  |
| 230901_x_at  | PCSK4          | 0,702292136  | 0,755840599  | -0,05354846 |  |
| 202001_s_at  | NDUFA6         | 5,712609252  | 5,766205262  | -0,05359601 |  |
| 221476_s_at  | RPL15          | 5,974143277  | 6,027752729  | -0,05360945 |  |
| 224298_s_at  | UBAC2          | 2,72965419   | 2,783327323  | -0,05367313 |  |
| 206315_at    | CRLF1          | -0,078265071 | -0,024572586 | -0,05369248 |  |
| 210228_at    | CSF2           | -0,078265071 | -0,024572586 | -0,05369248 |  |

|              |                 |              |              |             |  |
|--------------|-----------------|--------------|--------------|-------------|--|
| 215875_at    | -               | -0,078265071 | -0,024572586 | -0,05369248 |  |
| 216204_at    | COMT            | -0,078265071 | -0,024572586 | -0,05369248 |  |
| 220207_at    | YIF1B           | -0,078265071 | -0,024572586 | -0,05369248 |  |
| 218739_at    | ABHD5           | 2,540666392  | 2,594367918  | -0,05370153 |  |
| 221834_at    | LOC100507577 /  | 1,114389003  | 1,16809119   | -0,05370219 |  |
| 214268_s_at  | MTMR4           | 2,243430036  | 2,297144887  | -0,05371485 |  |
| 214706_at    | ZNF200          | 3,489018063  | 3,542741726  | -0,05372366 |  |
| 213629_x_at  | MT1F            | 3,38038663   | 3,434130109  | -0,05374348 |  |
| 207920_x_at  | ZFX             | 1,283332461  | 1,337086025  | -0,05375356 |  |
| 200929_at    | TMED10          | 5,237037499  | 5,290816791  | -0,05377929 |  |
| 218379_at    | RBM7            | 4,331018932  | 4,384854065  | -0,05383513 |  |
| 1555334_s_at | SLC30A5         | 2,35929703   | 2,413157372  | -0,05386034 |  |
| 207094_at    | CXCR1           | 0,57058931   | 0,624460759  | -0,05387145 |  |
| 221032_s_at  | TMPRSS5         | 0,57058931   | 0,624460759  | -0,05387145 |  |
| 227746_at    | ELAVL1          | 0,57058931   | 0,624460759  | -0,05387145 |  |
| 235428_at    | LOC100507316    | 0,57058931   | 0,624460759  | -0,05387145 |  |
| 201278_at    | DAB2            | 3,017453847  | 3,071356473  | -0,05390263 |  |
| 223740_at    | AGPAT4-IT1      | 0,810733188  | 0,864649967  | -0,05391678 |  |
| 224839_s_at  | GPT2            | 0,810733188  | 0,864649967  | -0,05391678 |  |
| 230592_at    | NSL1            | 0,810733188  | 0,864649967  | -0,05391678 |  |
| 238628_s_at  | TRAPPC2L        | 0,810733188  | 0,864649967  | -0,05391678 |  |
| 1556210_at   | -               | -3,192553003 | -3,138626879 | -0,05392612 |  |
| 1556936_at   | LOC100506834    | -3,192553003 | -3,138626879 | -0,05392612 |  |
| 1561166_a_at | -               | -3,192553003 | -3,138626879 | -0,05392612 |  |
| 1561222_at   | LINC00485       | -3,192553003 | -3,138626879 | -0,05392612 |  |
| 1561340_at   | -               | -3,192553003 | -3,138626879 | -0,05392612 |  |
| 1562342_at   | -               | -3,192553003 | -3,138626879 | -0,05392612 |  |
| 1566600_at   | -               | -3,192553003 | -3,138626879 | -0,05392612 |  |
| 1570233_at   | -               | -3,192553003 | -3,138626879 | -0,05392612 |  |
| 221111_at    | IL26            | -3,192553003 | -3,138626879 | -0,05392612 |  |
| 231558_at    | INSM1           | -3,192553003 | -3,138626879 | -0,05392612 |  |
| 234096_at    | -               | -3,192553003 | -3,138626879 | -0,05392612 |  |
| 234428_at    | -               | -3,192553003 | -3,138626879 | -0,05392612 |  |
| 242603_x_at  | KIN             | -3,192553003 | -3,138626879 | -0,05392612 |  |
| 244203_at    | -               | -3,192553003 | -3,138626879 | -0,05392612 |  |
| 212474_at    | AVL9            | 3,394805732  | 3,448769219  | -0,05396349 |  |
| 212994_at    | THOC2           | 2,466546243  | 2,520531219  | -0,05398498 |  |
| 223655_at    | CD163L1         | 3,927675977  | 3,981739614  | -0,05406364 |  |
| 228450_at    | PLEKHA7         | 2,277177578  | 2,331254065  | -0,05407649 |  |
| 200029_at    | RPL19           | 7,353575393  | 7,407673845  | -0,05409845 |  |
| 223038_s_at  | FAM60A          | 2,531373922  | 2,585563171  | -0,05418925 |  |
| 203227_s_at  | TSPAN31         | 1,689737652  | 1,743944487  | -0,05420684 |  |
| 225115_at    | HIPK2           | 1,191926657  | 1,246149888  | -0,05422323 |  |
| 237257_at    | RAB4B           | 1,011212064  | 1,065442793  | -0,05423073 |  |
| 225519_at    | PPP4R2          | 4,500600313  | 4,554848212  | -0,0542479  |  |
| 1553575_at   | ND6             | 3,776205896  | 3,830465122  | -0,05425923 |  |
| 1553366_s_at | ANKRD23 /// ANK | 0,425644434  | 0,479907041  | -0,05426261 |  |
| 203694_s_at  | DHX16           | 3,642769857  | 3,697038015  | -0,05426816 |  |
| 38918_at     | SOX13           | 0,190859031  | 0,245138287  | -0,05427926 |  |
| 220264_s_at  | GPR107          | 0,103263601  | 0,157549243  | -0,05428564 |  |
| 242139_s_at  | ERVK3-1         | 4,602617131  | 4,656929558  | -0,05431243 |  |
| 201760_s_at  | WSB2            | 4,544680214  | 4,599047207  | -0,05436699 |  |
| 225958_at    | PHC1            | 2,348755185  | 2,403170156  | -0,05441497 |  |
| 201317_s_at  | PSMA2           | 6,238997706  | 6,29341805   | -0,05442034 |  |
| 1564822_at   | -               | -0,59053611  | -0,536087151 | -0,05444896 |  |
| 1569723_a_at | SPIRE2          | -0,59053611  | -0,536087151 | -0,05444896 |  |

|              |                 |             |              |             |  |
|--------------|-----------------|-------------|--------------|-------------|--|
| 205821_at    | KLRC4-KLRK1 /// | -0,59053611 | -0,536087151 | -0,05444896 |  |
| 214669_x_at  | IGKC            | -0,59053611 | -0,536087151 | -0,05444896 |  |
| 217600_at    | SCUBE3          | -0,59053611 | -0,536087151 | -0,05444896 |  |
| 221306_at    | GPR27           | -0,59053611 | -0,536087151 | -0,05444896 |  |
| 221638_s_at  | STX16           | -0,59053611 | -0,536087151 | -0,05444896 |  |
| 243538_at    | -               | -0,59053611 | -0,536087151 | -0,05444896 |  |
| 202679_at    | NPC1            | 2,713311265 | 2,767843855  | -0,05453259 |  |
| 226102_at    | -               | 2,713311265 | 2,767843855  | -0,05453259 |  |
| 1555952_at   | SLC19A1         | 1,742232072 | 1,796776588  | -0,05454452 |  |
| 202614_at    | SLC30A9         | 3,904829675 | 3,959421856  | -0,05459218 |  |
| 204167_at    | BTD             | 0,682279745 | 0,73688026   | -0,05460052 |  |
| 230270_at    | PRPF38B         | 0,682279745 | 0,73688026   | -0,05460052 |  |
| 201220_x_at  | CTBP2           | 3,86543671  | 3,920040657  | -0,05460395 |  |
| 209572_s_at  | EED             | 4,851400868 | 4,906043932  | -0,05464306 |  |
| 229528_at    | SBNO1           | 1,795990708 | 1,85068474   | -0,05469403 |  |
| 1555575_a_at | KDELRL1         | 4,875469339 | 4,930239768  | -0,05477043 |  |
| 216111_x_at  | PMS2P3          | 1,000476627 | 1,055274826  | -0,0547982  |  |
| 202635_s_at  | POLR2K          | 5,333754759 | 5,388585991  | -0,05483123 |  |
| 202859_x_at  | IL8             | 1,414471577 | 1,469325098  | -0,05485352 |  |
| 217722_s_at  | NGRN            | 4,925274981 | 4,980136916  | -0,05486194 |  |
| 200075_s_at  | GUK1            | 3,301680869 | 3,356551164  | -0,0548703  |  |
| 222182_s_at  | CNOT2           | 3,582860873 | 3,637795954  | -0,05493508 |  |
| 225147_at    | CYTH3           | 2,582657321 | 2,637603218  | -0,0549459  |  |
| 211345_x_at  | EEF1G /// MIR36 | 7,483601424 | 7,538550342  | -0,05494892 |  |
| 208834_x_at  | RPL23A /// SNOF | 8,208154614 | 8,263116068  | -0,05496145 |  |
| 217849_s_at  | CDC42BPB        | 1,844820248 | 1,899812471  | -0,05499222 |  |
| 212050_at    | WIPF2           | 2,259277178 | 2,314300277  | -0,0550231  |  |
| 221843_s_at  | KIAA1609        | 1,089278259 | 1,144305291  | -0,05502703 |  |
| 201000_at    | AARS            | 3,882346871 | 3,937445604  | -0,05509873 |  |
| 1553075_a_at | OFCC1           | -3,15396682 | -3,098858316 | -0,0551085  |  |
| 1560994_x_at | LOC400590       | -3,15396682 | -3,098858316 | -0,0551085  |  |
| 1563054_at   | -               | -3,15396682 | -3,098858316 | -0,0551085  |  |
| 1564772_at   | -               | -3,15396682 | -3,098858316 | -0,0551085  |  |
| 1567656_at   | OR2H1           | -3,15396682 | -3,098858316 | -0,0551085  |  |
| 202989_at    | RGS1            | -3,15396682 | -3,098858316 | -0,0551085  |  |
| 210919_at    | PHLPP1          | -3,15396682 | -3,098858316 | -0,0551085  |  |
| 211917_s_at  | PRLR            | -3,15396682 | -3,098858316 | -0,0551085  |  |
| 215803_at    | CXorf57         | -3,15396682 | -3,098858316 | -0,0551085  |  |
| 215993_at    | -               | -3,15396682 | -3,098858316 | -0,0551085  |  |
| 220726_at    | -               | -3,15396682 | -3,098858316 | -0,0551085  |  |
| 233721_x_at  | -               | -3,15396682 | -3,098858316 | -0,0551085  |  |
| 238428_at    | KCNJ15          | -3,15396682 | -3,098858316 | -0,0551085  |  |
| 240570_at    | INADL           | -3,15396682 | -3,098858316 | -0,0551085  |  |
| 240619_at    | -               | -3,15396682 | -3,098858316 | -0,0551085  |  |
| 241833_at    | PEX5L           | -3,15396682 | -3,098858316 | -0,0551085  |  |
| 242468_at    | -               | -3,15396682 | -3,098858316 | -0,0551085  |  |
| 223117_s_at  | USP47           | 2,868962815 | 2,924079008  | -0,05511619 |  |
| 209874_x_at  | CNNM2           | 0,945567441 | 1,000684521  | -0,05511708 |  |
| 202488_s_at  | FXVD3           | 0,255492549 | 0,310717132  | -0,05522458 |  |
| 240673_at    | -               | 0,255492549 | 0,310717132  | -0,05522458 |  |
| 213300_at    | ATG2A           | 2,700102307 | 2,755336312  | -0,055234   |  |
| 209744_x_at  | ITCH            | 2,967339888 | 3,022611001  | -0,05527111 |  |
| 227507_at    | ZNF592          | 1,406361373 | 1,461646549  | -0,05528518 |  |
| 201724_s_at  | GALNT1          | 4,591929706 | 4,647230798  | -0,05530109 |  |
| 212673_at    | METAP1          | 4,423834624 | 4,479143747  | -0,05530912 |  |
| 225050_at    | ZNF512          | 3,253893136 | 3,309203139  | -0,05531    |  |

|              |                 |              |              |             |  |
|--------------|-----------------|--------------|--------------|-------------|--|
| 217788_s_at  | GALNT2          | 3,191547726  | 3,246908183  | -0,05536046 |  |
| 214845_s_at  | CALU            | 4,725454911  | 4,780891495  | -0,05543658 |  |
| 212991_at    | FBXO9           | 1,168140757  | 1,223626587  | -0,05548583 |  |
| 219485_s_at  | PSMD10          | 4,429348229  | 4,484837154  | -0,05548892 |  |
| 226528_at    | MTX3            | 1,937784532  | 1,993317152  | -0,05553262 |  |
| 239417_x_at  | C6orf52         | 1,937784532  | 1,993317152  | -0,05553262 |  |
| 204703_at    | IFT88           | 2,208874124  | 2,264418116  | -0,05554399 |  |
| 212300_at    | TXLNA           | 2,327437554  | 2,382985886  | -0,05554833 |  |
| 209343_at    | EFHD1           | 0,401366113  | 0,456918297  | -0,05555218 |  |
| 217352_at    | -               | 0,779676066  | 0,835239052  | -0,05556299 |  |
| 230328_at    | RRN3 /// RRN3P  | 0,779676066  | 0,835239052  | -0,05556299 |  |
| 223026_s_at  | VPS29           | 5,189534313  | 5,245142169  | -0,05560786 |  |
| 203405_at    | PSMG1           | 6,191781295  | 6,247408416  | -0,05562712 |  |
| 203190_at    | MIR4691 /// NDU | 4,216825331  | 4,272493466  | -0,05566813 |  |
| 223419_at    | FBXW9           | 2,691784869  | 2,747463672  | -0,0556788  |  |
| 201328_at    | ETS2            | 2,600539826  | 2,656223838  | -0,05568401 |  |
| 205763_s_at  | DDX18           | 3,747601714  | 3,803382393  | -0,05578068 |  |
| 1554039_at   | C14orf159       | 0,533835206  | 0,589657387  | -0,05582218 |  |
| 219656_at    | PCDH12          | 0,533835206  | 0,589657387  | -0,05582218 |  |
| 236816_at    | NAA25           | 0,533835206  | 0,589657387  | -0,05582218 |  |
| 221809_at    | RANBP10         | 1,073999308  | 1,129843209  | -0,0558439  |  |
| 1556555_at   | LOC100129461    | 0,072842263  | 0,128747141  | -0,05590488 |  |
| 1566646_at   | LOC149086       | 0,072842263  | 0,128747141  | -0,05590488 |  |
| 207065_at    | KRT75           | 0,072842263  | 0,128747141  | -0,05590488 |  |
| 208472_at    | IKZF4           | 0,072842263  | 0,128747141  | -0,05590488 |  |
| 223108_s_at  | ZCCHC17         | 3,657366303  | 3,713295978  | -0,05592968 |  |
| 226802_s_at  | LOC96610        | 1,394109935  | 1,450051551  | -0,05594162 |  |
| 201479_at    | DKC1 /// SNORA  | 6,134936883  | 6,190912937  | -0,05597605 |  |
| 209418_s_at  | THOC5           | 2,497416546  | 2,553413592  | -0,05599705 |  |
| 201441_at    | COX6B1          | 7,128459242  | 7,184456688  | -0,05599745 |  |
| 218360_at    | RAB22A          | 2,90394695   | 2,959949103  | -0,05600215 |  |
| 217942_at    | MRPS35          | 3,428234044  | 3,484256382  | -0,05602234 |  |
| 1559397_s_at | PRR14           | -0,622910612 | -0,566887459 | -0,05602315 |  |
| 201205_at    | -               | -0,622910612 | -0,566887459 | -0,05602315 |  |
| 222159_at    | -               | -0,622910612 | -0,566887459 | -0,05602315 |  |
| 229108_at    | LOC100507278    | -0,622910612 | -0,566887459 | -0,05602315 |  |
| 233128_at    | -               | -0,622910612 | -0,566887459 | -0,05602315 |  |
| 234911_at    | -               | -0,622910612 | -0,566887459 | -0,05602315 |  |
| 236320_at    | CCDC17          | -0,622910612 | -0,566887459 | -0,05602315 |  |
| 237965_at    | -               | -0,622910612 | -0,566887459 | -0,05602315 |  |
| 239169_at    | RDM1            | -0,622910612 | -0,566887459 | -0,05602315 |  |
| 242829_x_at  | -               | -0,622910612 | -0,566887459 | -0,05602315 |  |
| 214167_s_at  | RPLP0           | 6,872867017  | 6,928907203  | -0,05604019 |  |
| 202927_at    | PIN1            | 3,279650757  | 3,335699198  | -0,05604844 |  |
| 216685_s_at  | MTAP            | 1,462198073  | 1,518263577  | -0,0560655  |  |
| 235779_at    | ZNF790-AS1      | 1,593009234  | 1,64909809   | -0,05608886 |  |
| 212345_s_at  | CREB3L2         | 3,939667505  | 3,995764148  | -0,05609664 |  |
| 200721_s_at  | ACTR1A          | 3,316904202  | 3,373018423  | -0,05611422 |  |
| 224962_at    | C9orf69         | 2,493593689  | 2,549796788  | -0,0562031  |  |
| 202944_at    | NAGA            | 1,314003737  | 1,370274469  | -0,05627073 |  |
| 205797_s_at  | TCP11L1         | 1,314003737  | 1,370274469  | -0,05627073 |  |
| 235440_at    | SPTY2D1         | 1,314003737  | 1,370274469  | -0,05627073 |  |
| 209252_at    | HARS2           | 3,06588531   | 3,122166354  | -0,05628104 |  |
| 217099_s_at  | GEMIN4          | 2,422991296  | 2,479296438  | -0,05630514 |  |
| 201795_at    | LBR             | 5,042094889  | 5,098433773  | -0,05633888 |  |
| 200674_s_at  | RPL32           | 7,676534255  | 7,732885446  | -0,05635119 |  |



|              |                 |              |              |             |  |
|--------------|-----------------|--------------|--------------|-------------|--|
| 212214_at    | OPA1            | 2,87191078   | 2,928263672  | -0,05635289 |  |
| 206920_s_at  | GLE1            | 1,523472489  | 1,579853228  | -0,05638074 |  |
| 200990_at    | TRIM28          | 5,035372502  | 5,091764704  | -0,0563922  |  |
| 212114_at    | ATXN7L3B        | 4,282548314  | 4,338964815  | -0,0564165  |  |
| 204371_s_at  | KHSRP           | 0,648296226  | 0,704715219  | -0,05641899 |  |
| 204903_x_at  | ATG4B           | 3,329826127  | 3,386261038  | -0,05643491 |  |
| 208883_at    | UBR5            | 2,310153708  | 2,366632651  | -0,05647894 |  |
| 217799_x_at  | UBE2H           | 1,968405881  | 2,024923328  | -0,05651745 |  |
| 226970_at    | FBXO33          | 1,968405881  | 2,024923328  | -0,05651745 |  |
| 224677_x_at  | C11orf31        | 4,919231561  | 4,97576335   | -0,05653179 |  |
| 203210_s_at  | RFC5            | 2,014487247  | 2,071071048  | -0,0565838  |  |
| 220973_s_at  | SHARPIN         | 2,14450783   | 2,201267805  | -0,05675997 |  |
| 221551_x_at  | ST6GALNAC4      | -0,136301282 | -0,079522948 | -0,05677833 |  |
| 232430_at    | LOC148696       | -0,136301282 | -0,079522948 | -0,05677833 |  |
| 232483_at    | MED17           | -0,136301282 | -0,079522948 | -0,05677833 |  |
| 237309_at    | -               | -0,136301282 | -0,079522948 | -0,05677833 |  |
| 244284_at    | -               | -0,136301282 | -0,079522948 | -0,05677833 |  |
| 220262_s_at  | DLK2            | 1,143956113  | 1,200746069  | -0,05678996 |  |
| 227116_at    | MON1B           | 3,413135307  | 3,469974737  | -0,05683943 |  |
| 201115_at    | POLD2           | 2,938102794  | 2,994948944  | -0,05684615 |  |
| 226092_at    | MPP5            | 2,669932407  | 2,726791458  | -0,05685905 |  |
| 1565651_at   | -               | 0,376672223  | 0,433557298  | -0,05688507 |  |
| 203721_s_at  | UTP18           | 4,849158785  | 4,906043932  | -0,05688515 |  |
| 224826_at    | GPCPD1          | 3,008105382  | 3,065035915  | -0,05693053 |  |
| 217527_s_at  | NFATC2IP        | 3,182077878  | 3,239069096  | -0,05699122 |  |
| 212661_x_at  | LOC100288602 /  | 7,814077181  | 7,871083051  | -0,05700587 |  |
| 200038_s_at  | RPL17 /// RPL17 | 7,759185864  | 7,816206325  | -0,05702046 |  |
| 1568191_at   | -               | 0,052199481  | 0,109221392  | -0,05702191 |  |
| 203878_s_at  | MMP11           | 0,052199481  | 0,109221392  | -0,05702191 |  |
| 204317_at    | TRMU            | 0,052199481  | 0,109221392  | -0,05702191 |  |
| 215951_at    | -               | 0,052199481  | 0,109221392  | -0,05702191 |  |
| 230152_at    | WDR52           | 0,052199481  | 0,109221392  | -0,05702191 |  |
| 238129_s_at  | FZD2            | 0,052199481  | 0,109221392  | -0,05702191 |  |
| 240198_at    | -               | 0,052199481  | 0,109221392  | -0,05702191 |  |
| 232596_at    | DIAPH3          | 1,373456798  | 1,43051703   | -0,05706023 |  |
| 240277_at    | SLC30A7         | 1,442503549  | 1,499637023  | -0,05713347 |  |
| 216521_s_at  | BRCC3           | 0,95671774   | 1,013870809  | -0,05715307 |  |
| 1555201_a_at | RMND1           | 1,69307511   | 1,750261389  | -0,05718628 |  |
| 217672_x_at  | EIF1            | 1,69307511   | 1,750261389  | -0,05718628 |  |
| 244669_at    | SNORD50A /// S  | 1,954567604  | 2,011838132  | -0,05727053 |  |
| 1555350_at   | PPHLN1          | 0,747935635  | 0,805216064  | -0,05728043 |  |
| 230536_at    | PBX4            | 0,747935635  | 0,805216064  | -0,05728043 |  |
| 244032_at    | -               | 0,747935635  | 0,805216064  | -0,05728043 |  |
| 224594_x_at  | ACTB /// LOC100 | 7,838629819  | 7,895911833  | -0,05728201 |  |
| 225369_at    | ESAM            | 2,001086023  | 2,058399602  | -0,05731358 |  |
| 228393_s_at  | ZNF302          | 3,024094427  | 3,081412119  | -0,05731769 |  |
| 200914_x_at  | KTN1            | 3,046446467  | 3,103784293  | -0,05733783 |  |
| 207515_s_at  | POLR1C          | 4,175666075  | 4,23300737   | -0,0573413  |  |
| 215813_s_at  | PTGS1           | 3,366867184  | 3,424287521  | -0,05742034 |  |
| 214483_s_at  | ARFIP1          | 1,292162421  | 1,349621332  | -0,05745891 |  |
| 218675_at    | SLC22A17        | 1,292162421  | 1,349621332  | -0,05745891 |  |
| 201922_at    | NSA2            | 6,15011843   | 6,20757871   | -0,05746028 |  |
| 227153_at    | IMMP2L          | 2,213529682  | 2,271023131  | -0,05749345 |  |
| 200922_at    | KDELRL1         | 2,771299138  | 2,828804976  | -0,05750584 |  |
| 218870_at    | ARHGAP15        | 2,997346717  | 3,05486507   | -0,05751835 |  |
| 227587_at    | KRI1            | 2,972842302  | 3,030417996  | -0,05757569 |  |

|              |                  |              |              |             |  |
|--------------|------------------|--------------|--------------|-------------|--|
| 227124_at    | C6orf228         | 4,336364681  | 4,393960186  | -0,05759551 |  |
| 208959_s_at  | ERP44            | 4,317026567  | 4,374668281  | -0,05764171 |  |
| 206918_s_at  | CPNE1            | 3,795741421  | 3,853385784  | -0,05764436 |  |
| 31807_at     | DDX49            | 4,257265641  | 4,314928355  | -0,05766271 |  |
| 239083_at    | ZNF786           | 2,084778276  | 2,14244844   | -0,05767016 |  |
| 206788_s_at  | CBFB             | 2,288253583  | 2,345926937  | -0,05767335 |  |
| 211068_x_at  | FAM21A /// FAM2  | 2,768138014  | 2,825817328  | -0,05767931 |  |
| 218577_at    | LRRC40           | 3,982575608  | 4,040263518  | -0,05768791 |  |
| 208469_s_at  | EGFL8 /// PPT2 / | 0,209623097  | 0,26733076   | -0,05770766 |  |
| 217197_x_at  | N4BP2L1          | 0,209623097  | 0,26733076   | -0,05770766 |  |
| 207746_at    | POLQ             | 1,360921491  | 1,418668082  | -0,05774659 |  |
| 225177_at    | RAB11FIP1        | 1,360921491  | 1,418668082  | -0,05774659 |  |
| 226203_at    | MYO9A            | 1,360921491  | 1,418668082  | -0,05774659 |  |
| 200096_s_at  | ATP6V0E1         | 5,79150104   | 5,849286626  | -0,05778559 |  |
| 213627_at    | MAGED2           | 3,819603766  | 3,877391565  | -0,0577878  |  |
| 228943_at    | MAP6             | 0,359971644  | 0,417770464  | -0,05779882 |  |
| 224679_at    | MESDC2           | 2,710020346  | 2,767843855  | -0,05782351 |  |
| 1554105_at   | TMEM185A         | 0,496120222  | 0,553993624  | -0,0578734  |  |
| 223280_x_at  | MS4A6A           | 0,496120222  | 0,553993624  | -0,0578734  |  |
| 240449_at    | ZNF341           | 0,496120222  | 0,553993624  | -0,0578734  |  |
| 241574_s_at  | IGF2BP1          | 0,496120222  | 0,553993624  | -0,0578734  |  |
| 1553134_s_at | C9orf72          | -3,054236653 | -2,996335703 | -0,05790095 |  |
| 1553440_at   | CHST9-AS1        | -3,054236653 | -2,996335703 | -0,05790095 |  |
| 1554988_at   | SLC9C2           | -3,054236653 | -2,996335703 | -0,05790095 |  |
| 1560385_x_at | -                | -3,054236653 | -2,996335703 | -0,05790095 |  |
| 1561363_a_at | -                | -3,054236653 | -2,996335703 | -0,05790095 |  |
| 1563933_a_at | PLD5             | -3,054236653 | -2,996335703 | -0,05790095 |  |
| 1566463_at   | -                | -3,054236653 | -2,996335703 | -0,05790095 |  |
| 1567181_x_at | -                | -3,054236653 | -2,996335703 | -0,05790095 |  |
| 211169_s_at  | PPP1R3A          | -3,054236653 | -2,996335703 | -0,05790095 |  |
| 216775_at    | USP53            | -3,054236653 | -2,996335703 | -0,05790095 |  |
| 218469_at    | GREM1            | -3,054236653 | -2,996335703 | -0,05790095 |  |
| 219279_at    | DOCK10           | -3,054236653 | -2,996335703 | -0,05790095 |  |
| 220190_s_at  | GTF2A1L /// STC  | -3,054236653 | -2,996335703 | -0,05790095 |  |
| 231114_at    | SPATA22          | -3,054236653 | -2,996335703 | -0,05790095 |  |
| 231512_at    | -                | -3,054236653 | -2,996335703 | -0,05790095 |  |
| 232000_at    | -                | -3,054236653 | -2,996335703 | -0,05790095 |  |
| 239072_at    | EMB              | -3,054236653 | -2,996335703 | -0,05790095 |  |
| 241177_at    | -                | -3,054236653 | -2,996335703 | -0,05790095 |  |
| 242519_at    | CCDC152          | -3,054236653 | -2,996335703 | -0,05790095 |  |
| 244328_x_at  | -                | -3,054236653 | -2,996335703 | -0,05790095 |  |
| 231021_at    | SLC6A19          | 2,28383338   | 2,341749893  | -0,05791651 |  |
| 215529_x_at  | DIP2A            | 2,559073676  | 2,617011906  | -0,05793823 |  |
| 220939_s_at  | DPP8             | 3,790298086  | 3,848241888  | -0,0579438  |  |
| 200804_at    | TMBIM6           | 4,989115724  | 5,047086598  | -0,05797087 |  |
| 229268_at    | FAM105B          | 1,841816345  | 1,899812471  | -0,05799613 |  |
| 201607_at    | PWP1             | 2,355089531  | 2,413157372  | -0,05806784 |  |
| 209131_s_at  | SNAP23           | 2,732900676  | 2,791007185  | -0,05810651 |  |
| 208940_at    | SEPHS1           | 2,2992452    | 2,357351836  | -0,05810664 |  |
| 215588_x_at  | RIOK3            | 2,11992033   | 2,17802703   | -0,0581067  |  |
| 201377_at    | UBAP2L           | 3,586454644  | 3,644594022  | -0,05813938 |  |
| 218308_at    | TACC3            | 3,076146581  | 3,134292219  | -0,05814564 |  |
| 226481_at    | VPRBP            | 3,097712429  | 3,155865206  | -0,05815278 |  |
| 228162_at    | ESD              | 1,201332287  | 1,259496994  | -0,05816471 |  |
| 225684_at    | SKA2             | 4,269752826  | 4,327920804  | -0,05816798 |  |
| 214407_x_at  | GYPB             | 1,352503698  | 1,410714371  | -0,05821067 |  |

|             |                 |              |              |             |  |
|-------------|-----------------|--------------|--------------|-------------|--|
| 235408_x_at | ZNF117          | 1,352503698  | 1,410714371  | -0,05821067 |  |
| 218343_s_at | GTF3C3          | 3,5222335    | 3,580454966  | -0,05822147 |  |
| 212412_at   | PDLIM5          | 5,090985146  | 5,149211653  | -0,05822651 |  |
| 201368_at   | ZFP36L2         | 4,989794356  | 5,048048337  | -0,05825398 |  |
| 218534_s_at | AGGF1           | 3,006764929  | 3,065035915  | -0,05827099 |  |
| 209075_s_at | ISCU            | 5,33241776   | 5,390735672  | -0,05831791 |  |
| 208440_at   | C3orf27         | -0,67289328  | -0,614371577 | -0,0585217  |  |
| 210245_at   | ABCC8           | -0,67289328  | -0,614371577 | -0,0585217  |  |
| 215848_at   | SCAPER          | -0,67289328  | -0,614371577 | -0,0585217  |  |
| 228358_at   | SOX12           | -0,67289328  | -0,614371577 | -0,0585217  |  |
| 230754_at   | ZBTB38          | -0,67289328  | -0,614371577 | -0,0585217  |  |
| 242359_at   | -               | -0,67289328  | -0,614371577 | -0,0585217  |  |
| 243045_at   | SMYD1           | -0,67289328  | -0,614371577 | -0,0585217  |  |
| 243078_at   | -               | -0,67289328  | -0,614371577 | -0,0585217  |  |
| 79005_at    | SLC35E1         | 2,965960999  | 3,024566714  | -0,05860571 |  |
| 219288_at   | C3orf14         | 4,585658616  | 4,644266013  | -0,0586074  |  |
| 223087_at   | ECHDC1          | 5,261409968  | 5,320040195  | -0,05863023 |  |
| 227165_at   | SKA3            | 2,804079361  | 2,862725455  | -0,05864609 |  |
| 217938_s_at | KCMF1           | 4,880601177  | 4,939252798  | -0,05865162 |  |
| 221280_s_at | PARD3           | 0,928678725  | 0,987376598  | -0,05869787 |  |
| 217106_x_at | DIMT1           | 4,657889997  | 4,716616941  | -0,05872694 |  |
| 223983_s_at | C19orf12        | 4,795829226  | 4,854568586  | -0,05873936 |  |
| 206079_at   | CHML            | 0,020670649  | 0,079428135  | -0,05875749 |  |
| 206783_at   | FGF4            | 0,020670649  | 0,079428135  | -0,05875749 |  |
| 233017_x_at | -               | 0,020670649  | 0,079428135  | -0,05875749 |  |
| 240069_at   | -               | 0,020670649  | 0,079428135  | -0,05875749 |  |
| 210692_s_at | SLC43A3         | 3,620156261  | 3,678940066  | -0,05878381 |  |
| 205436_s_at | H2AFX           | 4,748093662  | 4,806881375  | -0,05878771 |  |
| 233955_x_at | CXXC5           | 4,692484877  | 4,751278918  | -0,05879404 |  |
| 202671_s_at | PDXK            | 4,35912833   | 4,417965868  | -0,05883754 |  |
| 201341_at   | ENC1            | 4,676977618  | 4,735843687  | -0,05886607 |  |
| 201716_at   | SNX1            | 3,340506684  | 3,399383202  | -0,05887652 |  |
| 219015_s_at | ALG13           | 2,303618506  | 2,362515214  | -0,05889671 |  |
| 201470_at   | GSTO1           | 7,267906476  | 7,326837088  | -0,05893061 |  |
| 211593_s_at | MAST2           | 1,187200746  | 1,246149888  | -0,05894914 |  |
| 242146_at   | SNRPA1          | 1,187200746  | 1,246149888  | -0,05894914 |  |
| 224876_at   | C5orf24         | 4,07117017   | 4,130196752  | -0,05902658 |  |
| 201277_s_at | HNRNPAB         | 6,49949026   | 6,558528746  | -0,05903849 |  |
| 1555412_at  | FBXL21          | -3,013665402 | -2,954576755 | -0,05908865 |  |
| 1555646_at  | Dbpht2          | -3,013665402 | -2,954576755 | -0,05908865 |  |
| 1555794_at  | ARL17A /// ARL1 | -3,013665402 | -2,954576755 | -0,05908865 |  |
| 1557642_at  | IQCA1           | -3,013665402 | -2,954576755 | -0,05908865 |  |
| 1561161_at  | -               | -3,013665402 | -2,954576755 | -0,05908865 |  |
| 1561902_at  | -               | -3,013665402 | -2,954576755 | -0,05908865 |  |
| 1563649_at  | -               | -3,013665402 | -2,954576755 | -0,05908865 |  |
| 209908_s_at | TGFB2           | -3,013665402 | -2,954576755 | -0,05908865 |  |
| 210121_at   | B3GALT2         | -3,013665402 | -2,954576755 | -0,05908865 |  |
| 211680_at   | PDLIM5          | -3,013665402 | -2,954576755 | -0,05908865 |  |
| 223821_s_at | SUSD4           | -3,013665402 | -2,954576755 | -0,05908865 |  |
| 224080_at   | -               | -3,013665402 | -2,954576755 | -0,05908865 |  |
| 230577_at   | LOC100507008    | -3,013665402 | -2,954576755 | -0,05908865 |  |
| 233675_s_at | TPTE2P6         | -3,013665402 | -2,954576755 | -0,05908865 |  |
| 234335_s_at | FAM84A          | -3,013665402 | -2,954576755 | -0,05908865 |  |
| 244118_at   | GABRA1          | -3,013665402 | -2,954576755 | -0,05908865 |  |
| 32094_at    | CHST3           | 1,742232072  | 1,801346674  | -0,05911146 |  |
| 229595_at   | CHCHD4          | 4,014272998  | 4,073389758  | -0,05911676 |  |

|              |                 |              |              |             |  |
|--------------|-----------------|--------------|--------------|-------------|--|
| 1553957_at   | ZNF564          | 2,87191078   | 2,93104672   | -0,05913594 |  |
| 229512_at    | FAM120C         | 2,182996494  | 2,242180416  | -0,05918392 |  |
| 201168_x_at  | ARHGDI          | 1,767779954  | 1,826973888  | -0,05919393 |  |
| 1555243_x_at | C8orf59         | 0,334552598  | 0,393761504  | -0,05920891 |  |
| 219982_s_at  | SERF1A /// SERF | 0,334552598  | 0,393761504  | -0,05920891 |  |
| 221293_s_at  | DEF6            | 0,334552598  | 0,393761504  | -0,05920891 |  |
| 227258_at    | CACUL1          | 0,334552598  | 0,393761504  | -0,05920891 |  |
| 220477_s_at  | TMEM230         | 4,875469339  | 4,934753321  | -0,05928398 |  |
| 221815_at    | ABHD2           | 2,470441349  | 2,529740643  | -0,05929929 |  |
| 230654_at    | -               | 0,917308734  | 0,976641161  | -0,05933243 |  |
| 200988_s_at  | PSME3           | 1,40228911   | 1,461646549  | -0,05935744 |  |
| 225104_at    | ZNF598          | 1,40228911   | 1,461646549  | -0,05935744 |  |
| 218190_s_at  | UQCR10          | 6,434925414  | 6,494297546  | -0,05937213 |  |
| 209050_s_at  | RALGDS          | 3,052955227  | 3,112391743  | -0,05943652 |  |
| 203502_at    | BPGM            | 3,137452663  | 3,196911138  | -0,05945847 |  |
| 203745_at    | HCCS            | 4,408689531  | 4,468168179  | -0,05947865 |  |
| 227172_at    | TMEM116         | 1,177702228  | 1,23718272   | -0,05948049 |  |
| 233270_x_at  | -               | 1,177702228  | 1,23718272   | -0,05948049 |  |
| 207871_s_at  | ST7 /// ST7-OT3 | 3,665883965  | 3,725370335  | -0,05948637 |  |
| 225001_at    | RAB3D           | 2,621710292  | 2,681234383  | -0,05952409 |  |
| 218948_at    | QRSL1           | 1,094335495  | 1,153866761  | -0,05953127 |  |
| 229231_at    | LRRRC37B        | 1,094335495  | 1,153866761  | -0,05953127 |  |
| 222494_at    | FOXN3           | 2,889473182  | 2,949006836  | -0,05953365 |  |
| 202736_s_at  | LSM4            | 5,023325284  | 5,082876522  | -0,05955124 |  |
| 201944_at    | HEXB            | 4,773538862  | 4,83315541   | -0,05961655 |  |
| 225498_at    | CHMP4B          | 4,479011826  | 4,538745139  | -0,05973331 |  |
| 201318_s_at  | MYL12A /// MYL1 | 6,351053802  | 6,410965355  | -0,05991155 |  |
| 1552311_a_at | RAX2            | -0,00073712  | 0,059218869  | -0,05995599 |  |
| 1554145_a_at | PPP1R21         | -0,00073712  | 0,059218869  | -0,05995599 |  |
| 1563783_a_at | ZNF333          | -0,00073712  | 0,059218869  | -0,05995599 |  |
| 202005_at    | ST14            | -0,00073712  | 0,059218869  | -0,05995599 |  |
| 214197_s_at  | SETDB1          | -0,00073712  | 0,059218869  | -0,05995599 |  |
| 1566816_at   | FGF22           | 0,457392764  | 0,51742585   | -0,06003309 |  |
| 203271_s_at  | UNC119          | 1,390002893  | 1,450051551  | -0,06004866 |  |
| 212548_s_at  | FRYL            | 2,456762221  | 2,516830926  | -0,0600687  |  |
| 225454_at    | CCDC124         | 2,879254447  | 2,939363796  | -0,06010935 |  |
| 206148_at    | IL3RA           | -0,196756757 | -0,136643983 | -0,06011277 |  |
| 206379_at    | EYA3            | -0,196756757 | -0,136643983 | -0,06011277 |  |
| 232898_at    | DAB2            | -0,196756757 | -0,136643983 | -0,06011277 |  |
| 233742_at    | METTL22         | -0,196756757 | -0,136643983 | -0,06011277 |  |
| 212746_s_at  | CEP170          | 2,854131948  | 2,914267328  | -0,06013538 |  |
| 53912_at     | SNX11           | 2,995996225  | 3,056140354  | -0,06014413 |  |
| 218198_at    | DHX32           | 2,352981171  | 2,413157372  | -0,0601762  |  |
| 1556088_at   | RPAIN           | 0,317354302  | 0,377530647  | -0,06017634 |  |
| 1556928_at   | -               | 0,317354302  | 0,377530647  | -0,06017634 |  |
| 215689_s_at  | SHBG            | 0,317354302  | 0,377530647  | -0,06017634 |  |
| 216842_x_at  | -               | 0,317354302  | 0,377530647  | -0,06017634 |  |
| 238913_at    | -               | 0,317354302  | 0,377530647  | -0,06017634 |  |
| 204183_s_at  | ADRBK2          | 0,695652136  | 0,755840599  | -0,06018846 |  |
| 216495_x_at  | -               | 0,695652136  | 0,755840599  | -0,06018846 |  |
| 240205_x_at  | -               | 0,695652136  | 0,755840599  | -0,06018846 |  |
| 1554030_at   | ARSB            | -0,706943342 | -0,646746079 | -0,06019726 |  |
| 1560180_at   | -               | -0,706943342 | -0,646746079 | -0,06019726 |  |
| 1568770_at   | MYLK            | -0,706943342 | -0,646746079 | -0,06019726 |  |
| 208165_s_at  | PRSS16          | -0,706943342 | -0,646746079 | -0,06019726 |  |
| 208230_s_at  | NRG1            | -0,706943342 | -0,646746079 | -0,06019726 |  |

|             |                 |              |              |             |  |
|-------------|-----------------|--------------|--------------|-------------|--|
| 208327_at   | CYP2A13         | -0,706943342 | -0,646746079 | -0,06019726 |  |
| 210640_s_at | GPER            | -0,706943342 | -0,646746079 | -0,06019726 |  |
| 215377_at   | CTBP2           | -0,706943342 | -0,646746079 | -0,06019726 |  |
| 216240_at   | MIR1204         | -0,706943342 | -0,646746079 | -0,06019726 |  |
| 217362_x_at | HLA-DRB6        | -0,706943342 | -0,646746079 | -0,06019726 |  |
| 228702_at   | FLJ43663        | -0,706943342 | -0,646746079 | -0,06019726 |  |
| 230180_at   | DDX17           | -0,706943342 | -0,646746079 | -0,06019726 |  |
| 230843_at   | -               | -0,706943342 | -0,646746079 | -0,06019726 |  |
| 242670_at   | LGI4            | -0,706943342 | -0,646746079 | -0,06019726 |  |
| 217898_at   | EMC7            | 4,374280229  | 4,434486264  | -0,06020604 |  |
| 228177_at   | CREBBP          | 1,163336153  | 1,223626587  | -0,06029043 |  |
| 212140_at   | PDS5A           | 3,436222554  | 3,496520471  | -0,06029792 |  |
| 217802_s_at | NUCKS1          | 5,043076031  | 5,10337687   | -0,06030084 |  |
| 238896_at   | -               | 2,122398022  | 2,182705233  | -0,06030721 |  |
| 201144_s_at | EIF2S1          | 5,976028196  | 6,036339961  | -0,06031176 |  |
| 206257_at   | CCDC9           | 0,57782909   | 0,638150376  | -0,06032129 |  |
| 206915_at   | NKX2-2          | 0,57782909   | 0,638150376  | -0,06032129 |  |
| 207741_x_at | TPSAB1          | 0,57782909   | 0,638150376  | -0,06032129 |  |
| 212211_at   | ANKRD17         | 2,874852734  | 2,935211251  | -0,06035852 |  |
| 216336_x_at | LOC100505584 /  | 2,874852734  | 2,935211251  | -0,06035852 |  |
| 218084_x_at | FXD5            | 5,702295069  | 5,762694471  | -0,0603994  |  |
| 209017_s_at | LONP1           | 3,574742007  | 3,635238397  | -0,06049639 |  |
| 202651_at   | LPGAT1          | 1,689737652  | 1,750261389  | -0,06052374 |  |
| 201554_x_at | GYG1            | 2,661438684  | 2,721978587  | -0,0605399  |  |
| 34225_at    | MIR943 /// WHSC | 2,29155987   | 2,352169913  | -0,06061004 |  |
| 227166_at   | DNAJC18         | 1,233777334  | 1,294497133  | -0,0607198  |  |
| 203664_s_at | POLR2D          | 2,86748657   | 2,928263672  | -0,0607771  |  |
| 219988_s_at | RNF220          | 2,842156496  | 2,902971658  | -0,06081516 |  |
| 222116_s_at | TBC1D16         | 1,153678675  | 1,214517879  | -0,0608392  |  |
| 208969_at   | NDUFA9          | 4,434840843  | 4,495687112  | -0,06084627 |  |
| 209450_at   | OSGEP           | 2,764969948  | 2,825817328  | -0,06084738 |  |
| 208690_s_at | PDLIM1          | 5,29611668   | 5,356985528  | -0,06086885 |  |
| 201491_at   | AHSA1           | 5,554513056  | 5,615408897  | -0,06089584 |  |
| 202190_at   | CSTF1           | 2,936695663  | 2,997606395  | -0,06091073 |  |
| 1562478_at  | LOC100652730 /  | -1,173767127 | -1,112851844 | -0,06091528 |  |
| 1565587_at  | -               | -1,173767127 | -1,112851844 | -0,06091528 |  |
| 1566623_at  | -               | -1,173767127 | -1,112851844 | -0,06091528 |  |
| 1566967_at  | SPRY4-IT1       | -1,173767127 | -1,112851844 | -0,06091528 |  |
| 1569856_at  | TPP2            | -1,173767127 | -1,112851844 | -0,06091528 |  |
| 205177_at   | TNNI1           | -1,173767127 | -1,112851844 | -0,06091528 |  |
| 206566_at   | SLC7A1          | -1,173767127 | -1,112851844 | -0,06091528 |  |
| 206697_s_at | HP              | -1,173767127 | -1,112851844 | -0,06091528 |  |
| 216759_at   | HRASLS2         | -1,173767127 | -1,112851844 | -0,06091528 |  |
| 227774_s_at | IMPAD1          | -1,173767127 | -1,112851844 | -0,06091528 |  |
| 228015_s_at | TRIM8           | -1,173767127 | -1,112851844 | -0,06091528 |  |
| 231349_at   | GPR150          | -1,173767127 | -1,112851844 | -0,06091528 |  |
| 231670_at   | -               | -1,173767127 | -1,112851844 | -0,06091528 |  |
| 244430_at   | PLD6            | -1,173767127 | -1,112851844 | -0,06091528 |  |
| 231897_at   | PTGR1           | 3,301680869  | 3,362748434  | -0,06106756 |  |
| 212596_s_at | HMGXB4          | 2,371846398  | 2,432926755  | -0,06108036 |  |
| 226531_at   | ORAI1           | 2,371846398  | 2,432926755  | -0,06108036 |  |
| 200900_s_at | M6PR            | 3,837056482  | 3,898162764  | -0,06110628 |  |
| 219819_s_at | MRPS28          | 5,532674715  | 5,593837599  | -0,06116288 |  |
| 228746_s_at | -               | 3,822654227  | 3,883869861  | -0,06121563 |  |
| 238315_s_at | ZNF567          | 2,146943689  | 2,208167653  | -0,06122396 |  |
| 222837_s_at | NAA15           | 3,402980973  | 3,464222256  | -0,06124128 |  |

|              |                |              |              |             |  |
|--------------|----------------|--------------|--------------|-------------|--|
| 204547_at    | RAB40B         | 3,085065712  | 3,146317015  | -0,0612513  |  |
| 224609_at    | SLC44A2        | 3,18563636   | 3,246908183  | -0,06127182 |  |
| 228968_at    | ZNF449         | 0,67554678   | 0,73688026   | -0,06133348 |  |
| 225702_at    | C8orf76        | 2,905386372  | 2,966746113  | -0,06135974 |  |
| 205904_at    | MICA           | 2,559073676  | 2,620464265  | -0,06139059 |  |
| 40148_at     | APBB2          | -2,024110821 | -1,962679142 | -0,06143168 |  |
| 217745_s_at  | NAA50          | 5,585709401  | 5,647172887  | -0,06146349 |  |
| 227479_at    | -              | 1,672933557  | 1,73441697   | -0,06148341 |  |
| 1559561_at   | FBXO18         | -0,221656139 | -0,160136748 | -0,06151939 |  |
| 204577_s_at  | CLUAP1         | -0,221656139 | -0,160136748 | -0,06151939 |  |
| 209690_s_at  | DOK4           | -0,221656139 | -0,160136748 | -0,06151939 |  |
| 211225_at    | FUT5           | -0,221656139 | -0,160136748 | -0,06151939 |  |
| 219416_at    | SCARA3         | -0,221656139 | -0,160136748 | -0,06151939 |  |
| 219907_at    | FRS3           | -0,221656139 | -0,160136748 | -0,06151939 |  |
| 221961_at    | CLCN7          | -0,221656139 | -0,160136748 | -0,06151939 |  |
| 230408_at    | -              | -0,221656139 | -0,160136748 | -0,06151939 |  |
| 228087_at    | CCDC126        | 1,614289682  | 1,675891488  | -0,06160181 |  |
| 209224_s_at  | NDUFA2         | 5,56991193   | 5,631538718  | -0,06162679 |  |
| 212716_s_at  | EIF3K          | 6,891780062  | 6,9534103    | -0,06163024 |  |
| 223560_s_at  | C2orf56        | 2,669932407  | 2,731588328  | -0,06165592 |  |
| 240494_at    | -              | 0,291166226  | 0,352836757  | -0,06167053 |  |
| 214546_s_at  | P2RY11 /// PPA | 1,139070151  | 1,200746069  | -0,06167592 |  |
| 200710_at    | ACADVL         | 3,582860873  | 3,644594022  | -0,06173315 |  |
| 218652_s_at  | PIGG           | 3,45992606   | 3,521663705  | -0,06173764 |  |
| 207791_s_at  | RAB1A          | 4,044635894  | 4,106388091  | -0,0617522  |  |
| 209927_s_at  | CHTOP          | 1,874520207  | 1,936283387  | -0,06176318 |  |
| 217234_s_at  | EZR            | 3,076146581  | 3,137910193  | -0,06176361 |  |
| 218408_at    | TIMM10         | 4,359653467  | 4,42143356   | -0,06178009 |  |
| 210395_x_at  | MYL4           | 6,670185808  | 6,73197677   | -0,06179096 |  |
| 1569073_x_at | SMARCA4        | -0,033456564 | 0,028364014  | -0,06182058 |  |
| 208204_s_at  | CAV3           | -0,033456564 | 0,028364014  | -0,06182058 |  |
| 211282_x_at  | TNFRSF25       | -0,033456564 | 0,028364014  | -0,06182058 |  |
| 219722_s_at  | GDPD3          | -0,033456564 | 0,028364014  | -0,06182058 |  |
| 234106_s_at  | FLYWCH1        | -0,033456564 | 0,028364014  | -0,06182058 |  |
| 238266_at    | -              | -0,033456564 | 0,028364014  | -0,06182058 |  |
| 225639_at    | SKAP2          | 2,721505869  | 2,783327323  | -0,06182145 |  |
| 1553808_a_at | NKX2-3         | -2,908843709 | -2,847001814 | -0,06184189 |  |
| 1554855_at   | PARK2          | -2,908843709 | -2,847001814 | -0,06184189 |  |
| 1555133_at   | FAM9A          | -2,908843709 | -2,847001814 | -0,06184189 |  |
| 1556462_a_at | -              | -2,908843709 | -2,847001814 | -0,06184189 |  |
| 1560619_at   | LOC255411      | -2,908843709 | -2,847001814 | -0,06184189 |  |
| 1562122_at   | -              | -2,908843709 | -2,847001814 | -0,06184189 |  |
| 1562595_at   | -              | -2,908843709 | -2,847001814 | -0,06184189 |  |
| 1564169_at   | -              | -2,908843709 | -2,847001814 | -0,06184189 |  |
| 1564640_at   | MGA            | -2,908843709 | -2,847001814 | -0,06184189 |  |
| 1567056_at   | OR8G2          | -2,908843709 | -2,847001814 | -0,06184189 |  |
| 1569641_at   | -              | -2,908843709 | -2,847001814 | -0,06184189 |  |
| 1570119_at   | PDS5B          | -2,908843709 | -2,847001814 | -0,06184189 |  |
| 210432_s_at  | SCN3A          | -2,908843709 | -2,847001814 | -0,06184189 |  |
| 215801_at    | -              | -2,908843709 | -2,847001814 | -0,06184189 |  |
| 216948_at    | -              | -2,908843709 | -2,847001814 | -0,06184189 |  |
| 224183_at    | -              | -2,908843709 | -2,847001814 | -0,06184189 |  |
| 229648_at    | ARHGAP32       | -2,908843709 | -2,847001814 | -0,06184189 |  |
| 230496_at    | FAM123A        | -2,908843709 | -2,847001814 | -0,06184189 |  |
| 233858_at    | -              | -2,908843709 | -2,847001814 | -0,06184189 |  |
| 234248_at    | -              | -2,908843709 | -2,847001814 | -0,06184189 |  |

|              |                |              |              |             |  |
|--------------|----------------|--------------|--------------|-------------|--|
| 237141_x_at  | -              | -2,908843709 | -2,847001814 | -0,06184189 |  |
| 237189_at    | -              | -2,908843709 | -2,847001814 | -0,06184189 |  |
| 237625_s_at  | -              | -2,908843709 | -2,847001814 | -0,06184189 |  |
| 238459_x_at  | SPATA6         | -2,908843709 | -2,847001814 | -0,06184189 |  |
| 239895_at    | AQR            | -2,908843709 | -2,847001814 | -0,06184189 |  |
| 240477_at    | -              | -2,908843709 | -2,847001814 | -0,06184189 |  |
| 244839_at    | TTN            | -2,908843709 | -2,847001814 | -0,06184189 |  |
| 227797_x_at  | LYRM2          | 1,05337236   | 1,115234684  | -0,06186232 |  |
| 218473_s_at  | GLT25D1        | 3,391728033  | 3,453616097  | -0,06188806 |  |
| 201739_at    | SGK1           | 5,268977636  | 5,330881068  | -0,06190343 |  |
| 1552632_a_at | ARSG           | -0,741668563 | -0,679763839 | -0,06190472 |  |
| 1554670_at   | GGA1           | -0,741668563 | -0,679763839 | -0,06190472 |  |
| 1554770_x_at | ZNF785         | -0,741668563 | -0,679763839 | -0,06190472 |  |
| 1555338_s_at | AQP10          | -0,741668563 | -0,679763839 | -0,06190472 |  |
| 1559049_a_at | -              | -0,741668563 | -0,679763839 | -0,06190472 |  |
| 1560618_at   | -              | -0,741668563 | -0,679763839 | -0,06190472 |  |
| 221320_at    | BCL2L10        | -0,741668563 | -0,679763839 | -0,06190472 |  |
| 233679_at    | LOC100506472   | -0,741668563 | -0,679763839 | -0,06190472 |  |
| 244438_at    | -              | -0,741668563 | -0,679763839 | -0,06190472 |  |
| 225041_at    | MPHOSPH8       | 2,771299138  | 2,833274877  | -0,06197574 |  |
| 217746_s_at  | PDCD6IP        | 4,684961624  | 4,746942086  | -0,06198046 |  |
| 210825_s_at  | PEBP1          | 5,602223606  | 5,664208385  | -0,06198478 |  |
| 217839_at    | TFG            | 4,731959456  | 4,79394496   | -0,0619855  |  |
| 202230_s_at  | CHERP          | 5,911592495  | 5,973609761  | -0,06201727 |  |
| 232510_s_at  | DPP3           | 4,028874132  | 4,090916839  | -0,06204271 |  |
| 201667_at    | GJA1           | 6,134169759  | 6,196272743  | -0,06210298 |  |
| 221906_at    | TXNRD3 /// TXN | 0,661985843  | 0,724100169  | -0,06211433 |  |
| 229679_at    | C12orf76       | 0,661985843  | 0,724100169  | -0,06211433 |  |
| 217797_at    | UFC1           | 4,897697188  | 4,959839678  | -0,06214249 |  |
| 200030_s_at  | SLC25A3        | 6,865999014  | 6,928210912  | -0,0622119  |  |
| 235657_at    | -              | 2,003776245  | 2,066015817  | -0,06223957 |  |
| 225961_at    | KLHDC5         | 1,129248302  | 1,191491281  | -0,06224298 |  |
| 202845_s_at  | RALBP1         | 3,727398669  | 3,789647959  | -0,06224929 |  |
| 201942_s_at  | CPD            | 0,417596971  | 0,479907041  | -0,06231007 |  |
| 206213_at    | WNT10B         | 0,417596971  | 0,479907041  | -0,06231007 |  |
| 230579_at    | LOC728705      | 0,417596971  | 0,479907041  | -0,06231007 |  |
| 237059_at    | -              | 0,417596971  | 0,479907041  | -0,06231007 |  |
| 212198_s_at  | TM9SF4         | 2,416948786  | 2,479296438  | -0,06234765 |  |
| 219892_at    | TM6SF1         | 2,571820446  | 2,634191677  | -0,06237123 |  |
| 220679_s_at  | CDH7           | 0,541261317  | 0,603679647  | -0,06241833 |  |
| 244515_at    | -              | 0,541261317  | 0,603679647  | -0,06241833 |  |
| 211784_s_at  | SRSF1          | 6,405346186  | 6,467770394  | -0,06242421 |  |
| 222645_s_at  | KCTD5          | 1,348276312  | 1,410714371  | -0,06243806 |  |
| 233986_s_at  | PLEKHG2        | 1,348276312  | 1,410714371  | -0,06243806 |  |
| 236478_at    | IFNAR1         | 1,348276312  | 1,410714371  | -0,06243806 |  |
| 200643_at    | HDLBP          | 2,084778276  | 2,147243253  | -0,06246498 |  |
| 202533_s_at  | DHFR           | 2,084778276  | 2,147243253  | -0,06246498 |  |
| 232160_s_at  | TNIP2          | 1,655931423  | 1,718396606  | -0,06246518 |  |
| 217907_at    | MRPL18         | 5,91481209   | 5,977316856  | -0,06250477 |  |
| 221488_s_at  | CUTA           | 5,709522732  | 5,77203766   | -0,06251493 |  |
| 227579_at    | FER            | 1,596577845  | 1,659204017  | -0,06262617 |  |
| 202870_s_at  | CDC20          | 4,171484821  | 4,234134575  | -0,06264975 |  |
| 225139_at    | NFATC3         | 3,49093683   | 3,553617909  | -0,06268108 |  |
| 205397_x_at  | SMAD3          | 0,273439642  | 0,336136178  | -0,06269654 |  |
| 228096_at    | MINOS1         | 0,273439642  | 0,336136178  | -0,06269654 |  |
| 235128_at    | SYNPO          | 0,273439642  | 0,336136178  | -0,06269654 |  |

|              |                 |              |             |             |  |
|--------------|-----------------|--------------|-------------|-------------|--|
| 229884_s_at  | MRPL2           | 2,272723257  | 2,335461563 | -0,06273831 |  |
| 227416_s_at  | ZCRB1           | 2,972842302  | 3,035599287 | -0,06275699 |  |
| 223128_at    | FOXRED1         | 2,705069849  | 2,767843855 | -0,06277401 |  |
| 40149_at     | SH2B1           | 1,079110292  | 1,141904989 | -0,0627947  |  |
| 201009_s_at  | TXNIP           | 4,279221286  | 4,34210478  | -0,06288349 |  |
| 228280_at    | ZC3HAV1L        | 5,260285448  | 5,323221574 | -0,06293613 |  |
| 227465_at    | MAU2            | 2,854131948  | 2,917077481 | -0,06294553 |  |
| 224387_at    | COMMD5          | 3,373122675  | 3,436090594 | -0,06296792 |  |
| 219224_x_at  | ZNF408          | 2,26825514   | 2,331254065 | -0,06299892 |  |
| 208658_at    | PDIA4           | 3,421207626  | 3,484256382 | -0,06304876 |  |
| 204815_s_at  | DHX34           | -0,055687482 | 0,007421914 | -0,0631094  |  |
| 213666_at    | 38961           | -0,055687482 | 0,007421914 | -0,0631094  |  |
| 219152_at    | PODXL2          | -0,055687482 | 0,007421914 | -0,0631094  |  |
| 234842_at    | -               | -0,055687482 | 0,007421914 | -0,0631094  |  |
| 202244_at    | PSMB4           | 6,56003291   | 6,623198056 | -0,06316515 |  |
| 226726_at    | MBOAT2          | 2,466546243  | 2,529740643 | -0,0631944  |  |
| 225880_at    | TOR1AIP2        | 3,352164686  | 3,415371412 | -0,06320673 |  |
| 202708_s_at  | HIST2H2BE       | 3,367911651  | 3,431184377 | -0,06327273 |  |
| 203082_at    | BMS1            | 4,007586951  | 4,070868415 | -0,06328146 |  |
| 234877_x_at  | -               | 0,641402394  | 0,704715219 | -0,06331282 |  |
| 207573_x_at  | ATP5L           | 6,446465772  | 6,50979668  | -0,06333091 |  |
| 223375_at    | TBC1D22B        | 2,261526912  | 2,324919719 | -0,06339281 |  |
| 201056_at    | GOLGB1          | 1,261018186  | 1,324440845 | -0,06342266 |  |
| 234973_at    | SLC38A5         | 3,680249569  | 3,743690278 | -0,06344071 |  |
| 211697_x_at  | PNO1            | 4,06796029   | 4,131407181 | -0,06344689 |  |
| 213521_at    | PTPN18          | 1,462198073  | 1,525647381 | -0,06344931 |  |
| 213861_s_at  | METTL21B        | 1,462198073  | 1,525647381 | -0,06344931 |  |
| 227099_s_at  | C11orf96        | 4,880967039  | 4,944427124 | -0,06346009 |  |
| 229983_at    | TIGD2           | 1,795990708  | 1,859476797 | -0,06348609 |  |
| 55065_at     | MARK4           | 3,832523915  | 3,896027834 | -0,06350392 |  |
| 210540_s_at  | B4GALT4         | 2,185368281  | 2,248887791 | -0,06351951 |  |
| 214548_x_at  | GNAS            | 6,462933145  | 6,526454326 | -0,06352118 |  |
| 202139_at    | AKR7A2          | 2,86748657   | 2,93104672  | -0,06356015 |  |
| 218250_s_at  | CNOT7           | 5,827536544  | 5,89115528  | -0,06361874 |  |
| 210240_s_at  | CDKN2D          | 1,326951551  | 1,390636111 | -0,06368456 |  |
| 227524_at    | FZD3            | 0,841135803  | 0,904843258 | -0,06370746 |  |
| 1559261_a_at | LOC100653085 /  | -0,259832361 | -0,19610998 | -0,06372238 |  |
| 233674_at    | -               | -0,259832361 | -0,19610998 | -0,06372238 |  |
| 237107_at    | PRKRA           | -0,259832361 | -0,19610998 | -0,06372238 |  |
| 238352_s_at  | -               | -0,259832361 | -0,19610998 | -0,06372238 |  |
| 240001_at    | -               | -0,259832361 | -0,19610998 | -0,06372238 |  |
| 224586_x_at  | SUB1            | 6,633634893  | 6,697404191 | -0,0637693  |  |
| 212932_at    | RAB3GAP1        | 2,35929703   | 2,423075926 | -0,0637789  |  |
| 226095_s_at  | ATXN1L          | 2,102456302  | 2,166264721 | -0,06380842 |  |
| 210639_s_at  | ATG5            | 3,253893136  | 3,317734938 | -0,0638418  |  |
| 203031_s_at  | UROS            | 1,515954005  | 1,579853228 | -0,06389922 |  |
| 223722_at    | DNAJC12         | 1,515954005  | 1,579853228 | -0,06389922 |  |
| 218305_at    | IPO4            | 3,58914411   | 3,653046807 | -0,0639027  |  |
| 224511_s_at  | TXNDC17         | 5,757135578  | 5,821058665 | -0,06392309 |  |
| 1555154_a_at | QKI             | 2,178241192  | 2,242180416 | -0,06393922 |  |
| 200730_s_at  | PTP4A1          | 4,00557508   | 4,06960609  | -0,06403101 |  |
| 238807_at    | ANKRD46 /// GAI | 2,250242994  | 2,314300277 | -0,06405728 |  |
| 51200_at     | C19orf60        | 2,761000057  | 2,825069449 | -0,06406939 |  |
| 202578_s_at  | DDX19A          | 2,512607472  | 2,576704359 | -0,06409689 |  |
| 210559_s_at  | CDK1            | 3,784051878  | 3,848241888 | -0,06419001 |  |
| 228605_at    | UBXN2A          | 2,173470163  | 2,237691445 | -0,06422128 |  |



|              |          |             |              |             |  |
|--------------|----------|-------------|--------------|-------------|--|
| 212741_at    | MAOA     | 3,85579038  | 3,920040657  | -0,06425028 |  |
| 65585_at     | FAM86B1  | 1,448440187 | 1,512700819  | -0,06426063 |  |
| 205604_at    | HOXD9    | 0,246434561 | 0,310717132  | -0,06428257 |  |
| 218759_at    | DVL2     | 0,246434561 | 0,310717132  | -0,06428257 |  |
| 222881_at    | HPSE     | 0,246434561 | 0,310717132  | -0,06428257 |  |
| 242361_at    | -        | 0,246434561 | 0,310717132  | -0,06428257 |  |
| 201492_s_at  | RPL41    | 8,381324843 | 8,445610424  | -0,06428558 |  |
| 1552310_at   | C15orf40 | 1,968405881 | 2,032717854  | -0,06431197 |  |
| 223274_at    | TCF19    | 1,968405881 | 2,032717854  | -0,06431197 |  |
| 1555385_at   | B4GALNT1 | -1,2845686  | -1,220210588 | -0,06435801 |  |
| 1558020_at   | ERGIC3   | -1,2845686  | -1,220210588 | -0,06435801 |  |
| 1563509_at   | -        | -1,2845686  | -1,220210588 | -0,06435801 |  |
| 1566501_at   | -        | -1,2845686  | -1,220210588 | -0,06435801 |  |
| 1570200_at   | HELB     | -1,2845686  | -1,220210588 | -0,06435801 |  |
| 203982_s_at  | ABCD4    | -1,2845686  | -1,220210588 | -0,06435801 |  |
| 206631_at    | PTGER2   | -1,2845686  | -1,220210588 | -0,06435801 |  |
| 212938_at    | COL6A1   | -1,2845686  | -1,220210588 | -0,06435801 |  |
| 213978_at    | MTSS1L   | -1,2845686  | -1,220210588 | -0,06435801 |  |
| 230909_at    | COX18    | -1,2845686  | -1,220210588 | -0,06435801 |  |
| 231609_at    | C10orf82 | -1,2845686  | -1,220210588 | -0,06435801 |  |
| 234908_s_at  | DSCAML1  | -1,2845686  | -1,220210588 | -0,06435801 |  |
| 237221_at    | -        | -1,2845686  | -1,220210588 | -0,06435801 |  |
| 238153_at    | PDE6B    | -1,2845686  | -1,220210588 | -0,06435801 |  |
| 239021_at    | TLR6     | -1,2845686  | -1,220210588 | -0,06435801 |  |
| 241224_x_at  | DSCR8    | -1,2845686  | -1,220210588 | -0,06435801 |  |
| 241555_at    | -        | -1,2845686  | -1,220210588 | -0,06435801 |  |
| 208838_at    | CAND1    | 4,102254727 | 4,166665505  | -0,06441078 |  |
| 1552944_a_at | PANX2    | 0,82905153  | 0,893473268  | -0,06442174 |  |
| 205079_s_at  | MPDZ     | 0,82905153  | 0,893473268  | -0,06442174 |  |
| 226710_at    | C8orf82  | 3,899061119 | 3,963505394  | -0,06444427 |  |
| 217289_s_at  | SLC37A4  | 1,314003737 | 1,378453643  | -0,06444991 |  |
| 219548_at    | ZNF16    | 1,314003737 | 1,378453643  | -0,06444991 |  |
| 230767_at    | -        | 1,621313976 | 1,685812099  | -0,06449812 |  |
| 208817_at    | COMT     | 2,089851283 | 2,154405725  | -0,06455444 |  |
| 212213_x_at  | OPA1     | 3,443176398 | 3,507749374  | -0,06457298 |  |
| 202289_s_at  | TACC2    | 0,503742507 | 0,568365095  | -0,06462259 |  |
| 221705_s_at  | SIKE1    | 0,503742507 | 0,568365095  | -0,06462259 |  |
| 206661_at    | DBF4B    | -0,79540287 | -0,730778808 | -0,06462406 |  |
| 207778_at    | REG1P    | -0,79540287 | -0,730778808 | -0,06462406 |  |
| 210190_at    | STX11    | -0,79540287 | -0,730778808 | -0,06462406 |  |
| 214208_at    | KLHL35   | -0,79540287 | -0,730778808 | -0,06462406 |  |
| 214308_s_at  | HGD      | -0,79540287 | -0,730778808 | -0,06462406 |  |
| 215246_at    | LARP7    | -0,79540287 | -0,730778808 | -0,06462406 |  |
| 217432_s_at  | IDS      | -0,79540287 | -0,730778808 | -0,06462406 |  |
| 219886_at    | CEP97    | -0,79540287 | -0,730778808 | -0,06462406 |  |
| 221262_s_at  | SLC2A11  | -0,79540287 | -0,730778808 | -0,06462406 |  |
| 223438_s_at  | PPARA    | -0,79540287 | -0,730778808 | -0,06462406 |  |
| 231744_at    | CELF5    | -0,79540287 | -0,730778808 | -0,06462406 |  |
| 233322_at    | CD9      | -0,79540287 | -0,730778808 | -0,06462406 |  |
| 237623_at    | CST3     | -0,79540287 | -0,730778808 | -0,06462406 |  |
| 217025_s_at  | DBN1     | 1,726031811 | 1,790660532  | -0,06462872 |  |
| 202078_at    | COPS3    | 4,83676466  | 4,901439515  | -0,06467486 |  |
| 209845_at    | MKRN1    | 3,53158484  | 3,596320795  | -0,06473595 |  |
| 226636_at    | PLD1     | 1,823660386 | 1,888402606  | -0,06474222 |  |
| 202043_s_at  | SMS      | 5,666876997 | 5,731704822  | -0,06482783 |  |
| 209102_s_at  | HBP1     | 2,845159691 | 2,910041809  | -0,06488212 |  |

|              |                   |              |              |             |  |
|--------------|-------------------|--------------|--------------|-------------|--|
| 209360_s_at  | LOC100506403 /    | 2,845159691  | 2,910041809  | -0,06488212 |  |
| 227930_at    | EIF2C4            | 1,000476627  | 1,065442793  | -0,06496617 |  |
| 209892_at    | FUT4              | 1,305306849  | 1,370274469  | -0,06496762 |  |
| 239757_at    | ZFAND6            | 1,305306849  | 1,370274469  | -0,06496762 |  |
| 203616_at    | POLB              | 4,052452667  | 4,117425547  | -0,06497288 |  |
| 225708_at    | MED29             | 2,338135744  | 2,403170156  | -0,06503441 |  |
| 211500_at    | MAPK11            | 0,911589958  | 0,976641161  | -0,0650512  |  |
| 211342_x_at  | MED12             | 1,865674241  | 1,930732138  | -0,0650579  |  |
| 220140_s_at  | SNX11             | 1,865674241  | 1,930732138  | -0,0650579  |  |
| 217796_s_at  | NPLOC4            | 2,911129742  | 2,976208448  | -0,06507871 |  |
| 203610_s_at  | TRIM38            | 1,434549838  | 1,499637023  | -0,06508719 |  |
| 1555548_at   | NDUFA10           | -0,089689931 | -0,024572586 | -0,06511734 |  |
| 203074_at    | ANXA8 /// ANXA8   | -0,089689931 | -0,024572586 | -0,06511734 |  |
| 204857_at    | MAD1L1            | -0,089689931 | -0,024572586 | -0,06511734 |  |
| 214579_at    | NIPAL3            | -0,089689931 | -0,024572586 | -0,06511734 |  |
| 220989_s_at  | AMN               | -0,089689931 | -0,024572586 | -0,06511734 |  |
| 223462_at    | TMEM175           | -0,089689931 | -0,024572586 | -0,06511734 |  |
| 204195_s_at  | PKNOX1            | 1,079110292  | 1,144305291  | -0,065195   |  |
| 213684_s_at  | PDLIM5            | 1,716223609  | 1,781437557  | -0,06521395 |  |
| 203686_at    | MPG               | 2,266015882  | 2,331254065  | -0,06523818 |  |
| 203386_at    | TBC1D4            | 3,566577193  | 3,631821253  | -0,06524406 |  |
| 1555234_a_at | RHOJ              | -0,285837228 | -0,220592223 | -0,065245   |  |
| 217381_s_at  | TARP              | -0,285837228 | -0,220592223 | -0,065245   |  |
| 219424_at    | EBI3              | -0,285837228 | -0,220592223 | -0,065245   |  |
| 220650_s_at  | SLC9A5            | -0,285837228 | -0,220592223 | -0,065245   |  |
| 221690_s_at  | NLRP2             | -0,285837228 | -0,220592223 | -0,065245   |  |
| 241725_at    | E2F7              | -0,285837228 | -0,220592223 | -0,065245   |  |
| 242675_x_at  | -                 | -0,285837228 | -0,220592223 | -0,065245   |  |
| 64474_g_at   | DGCR8 /// MIR13   | 2,247975581  | 2,313234021  | -0,06525844 |  |
| 216152_at    | -                 | 0,228146222  | 0,293518836  | -0,06537261 |  |
| 228549_at    | -                 | 0,228146222  | 0,293518836  | -0,06537261 |  |
| 244661_at    | SOAT1             | 0,228146222  | 0,293518836  | -0,06537261 |  |
| 221467_at    | MC4R              | 0,606430281  | 0,67181667   | -0,06538639 |  |
| 221713_s_at  | MAP6D1            | 0,606430281  | 0,67181667   | -0,06538639 |  |
| 213883_s_at  | TM2D1             | 3,42923503   | 3,49464046   | -0,06540543 |  |
| 209891_at    | SPC25             | 3,013454777  | 3,078904771  | -0,06544999 |  |
| 212465_at    | SETD3             | 3,938261899  | 4,003717379  | -0,06545548 |  |
| 226885_at    | RNF217            | 2,632180155  | 2,697670403  | -0,06549025 |  |
| 229044_at    | NUDT17            | 0,810733188  | 0,876248481  | -0,06551529 |  |
| 204449_at    | PDCL              | 2,225103271  | 2,290658654  | -0,06555538 |  |
| 64408_s_at   | CALML4            | -0,527128463 | -0,4615169   | -0,06561156 |  |
| 1554871_at   | -                 | -2,756478458 | -2,690860744 | -0,06561771 |  |
| 1555884_at   | PSMD6             | -2,756478458 | -2,690860744 | -0,06561771 |  |
| 1557779_at   | -                 | -2,756478458 | -2,690860744 | -0,06561771 |  |
| 1559152_at   | -                 | -2,756478458 | -2,690860744 | -0,06561771 |  |
| 1559814_at   | -                 | -2,756478458 | -2,690860744 | -0,06561771 |  |
| 1562051_at   | LOC284757 /// LOC | -2,756478458 | -2,690860744 | -0,06561771 |  |
| 1563801_at   | -                 | -2,756478458 | -2,690860744 | -0,06561771 |  |
| 1569041_at   | -                 | -2,756478458 | -2,690860744 | -0,06561771 |  |
| 1569259_at   | -                 | -2,756478458 | -2,690860744 | -0,06561771 |  |
| 202291_s_at  | MGP               | -2,756478458 | -2,690860744 | -0,06561771 |  |
| 204965_at    | GC                | -2,756478458 | -2,690860744 | -0,06561771 |  |
| 215791_at    | -                 | -2,756478458 | -2,690860744 | -0,06561771 |  |
| 217649_at    | ZFAND5            | -2,756478458 | -2,690860744 | -0,06561771 |  |
| 222325_at    | -                 | -2,756478458 | -2,690860744 | -0,06561771 |  |
| 226864_at    | PKIA              | -2,756478458 | -2,690860744 | -0,06561771 |  |

|              |                 |              |              |             |  |
|--------------|-----------------|--------------|--------------|-------------|--|
| 230741_at    | -               | -2,756478458 | -2,690860744 | -0,06561771 |  |
| 231608_at    | -               | -2,756478458 | -2,690860744 | -0,06561771 |  |
| 232815_at    | FBXO3           | -2,756478458 | -2,690860744 | -0,06561771 |  |
| 233343_at    | DEFB127         | -2,756478458 | -2,690860744 | -0,06561771 |  |
| 235461_at    | TET2            | -2,756478458 | -2,690860744 | -0,06561771 |  |
| 235691_at    | -               | -2,756478458 | -2,690860744 | -0,06561771 |  |
| 235821_at    | WISP1           | -2,756478458 | -2,690860744 | -0,06561771 |  |
| 237353_at    | -               | -2,756478458 | -2,690860744 | -0,06561771 |  |
| 240063_at    | GUSBP5          | -2,756478458 | -2,690860744 | -0,06561771 |  |
| 240836_at    | ZNF19           | -2,756478458 | -2,690860744 | -0,06561771 |  |
| 241902_at    | MKX             | -2,756478458 | -2,690860744 | -0,06561771 |  |
| 244867_at    | -               | -2,756478458 | -2,690860744 | -0,06561771 |  |
| 221607_x_at  | ACTG1           | 7,945687044  | 8,011355583  | -0,06566854 |  |
| 236302_at    | PPM1E           | 2,327437554  | 2,39311332   | -0,06567577 |  |
| 215245_x_at  | FMR1            | 3,358484112  | 3,424287521  | -0,06580341 |  |
| 201212_at    | LGMN            | 1,422536444  | 1,488344553  | -0,06580811 |  |
| 218869_at    | MLYCD           | 1,422536444  | 1,488344553  | -0,06580811 |  |
| 202899_s_at  | SRSF3           | 5,928150262  | 5,994048261  | -0,065898   |  |
| 212036_s_at  | PNN             | 5,407731636  | 5,473720385  | -0,06598875 |  |
| 228204_at    | PSMB4           | 2,623460554  | 2,689475799  | -0,06601525 |  |
| 200704_at    | LITAF           | 4,795829226  | 4,861879358  | -0,06605013 |  |
| 205105_at    | MAN2A1          | 3,161745659  | 3,227795991  | -0,06605033 |  |
| 219437_s_at  | ANKRD11         | 0,702292136  | 0,768343791  | -0,06605165 |  |
| 235473_at    | -               | 1,593009234  | 1,659204017  | -0,06619478 |  |
| 210859_x_at  | CLN3            | 1,799091453  | 1,865308541  | -0,06621709 |  |
| 211474_s_at  | SERPINB6        | 4,266956117  | 4,333190402  | -0,06623429 |  |
| 235688_s_at  | TRAF4           | 0,592200562  | 0,658444279  | -0,06624372 |  |
| 201637_s_at  | FXR1            | 4,97684544   | 5,043233221  | -0,06638778 |  |
| 221269_s_at  | SH3BGRL3        | 5,325848494  | 5,392251169  | -0,06640267 |  |
| 202977_s_at  | CREBZF          | -0,83191556  | -0,765504029 | -0,06641153 |  |
| 210810_s_at  | SLC6A5          | -0,83191556  | -0,765504029 | -0,06641153 |  |
| 211397_x_at  | KIR2DL2         | -0,83191556  | -0,765504029 | -0,06641153 |  |
| 223850_at    | -               | -0,83191556  | -0,765504029 | -0,06641153 |  |
| 227806_at    | C16orf74        | -0,83191556  | -0,765504029 | -0,06641153 |  |
| 230870_at    | CFL1            | -0,83191556  | -0,765504029 | -0,06641153 |  |
| 233192_s_at  | RUFY2           | -0,83191556  | -0,765504029 | -0,06641153 |  |
| 233731_at    | -               | -0,83191556  | -0,765504029 | -0,06641153 |  |
| 235897_at    | COPZ2           | -0,83191556  | -0,765504029 | -0,06641153 |  |
| 236566_at    | -               | -0,83191556  | -0,765504029 | -0,06641153 |  |
| 239623_at    | C5orf63         | -0,83191556  | -0,765504029 | -0,06641153 |  |
| 242374_at    | -               | -0,83191556  | -0,765504029 | -0,06641153 |  |
| 223009_at    | LAMTOR1         | 5,131831158  | 5,198262927  | -0,06643177 |  |
| 233642_s_at  | HEATR5B         | 3,037284587  | 3,103784293  | -0,06649971 |  |
| 1557970_s_at | RPS6KA2         | -0,112808516 | -0,046302147 | -0,06650637 |  |
| 209766_at    | PRDX3           | -0,112808516 | -0,046302147 | -0,06650637 |  |
| 243777_at    | RAB7L1          | -0,112808516 | -0,046302147 | -0,06650637 |  |
| 219625_s_at  | COL4A3BP        | 2,05655332   | 2,123108223  | -0,0665549  |  |
| 241602_at    | ZNF582          | 0,97328325   | 1,039887232  | -0,06660398 |  |
| 225422_at    | CDC26           | 4,278110569  | 4,344716207  | -0,06660564 |  |
| 202290_at    | PDAP1           | 3,500492568  | 3,56709884   | -0,06660627 |  |
| 201665_x_at  | RPS17 /// RPS17 | 8,007268338  | 8,07387752   | -0,06660918 |  |
| 223602_at    | USP30           | 0,882651021  | 0,949447784  | -0,06679676 |  |
| 242154_x_at  | LRR1            | 0,882651021  | 0,949447784  | -0,06679676 |  |
| 224896_s_at  | TTL             | 2,882181479  | 2,949006836  | -0,06682536 |  |
| 225196_s_at  | MRPS26          | 4,120341088  | 4,187181377  | -0,06684029 |  |
| 1554980_a_at | ATF3            | 0,46522187   | 0,532164371  | -0,0669425  |  |

|              |                 |              |              |             |  |
|--------------|-----------------|--------------|--------------|-------------|--|
| 214000_s_at  | RGS10           | 0,46522187   | 0,532164371  | -0,0669425  |  |
| 226280_at    | BNIP2           | 3,202127528  | 3,269073685  | -0,06694616 |  |
| 208647_at    | FDFT1           | 5,768846677  | 5,835798689  | -0,06695201 |  |
| 235292_at    | FLJ32255        | 2,987866617  | 3,05486507   | -0,06699845 |  |
| 44654_at     | G6PC3           | 3,558365907  | 3,625392211  | -0,0670263  |  |
| 211720_x_at  | RPLP0           | 7,853293826  | 7,920320531  | -0,0670267  |  |
| 221959_at    | FAM110B         | 1,40228911   | 1,469325098  | -0,06703599 |  |
| 1555461_at   | -               | 0,20027154   | 0,26733076   | -0,06705922 |  |
| 229548_at    | -               | 0,20027154   | 0,26733076   | -0,06705922 |  |
| 212895_s_at  | ABR             | 1,04816921   | 1,115234684  | -0,06706547 |  |
| 219490_s_at  | DCLRE1B         | 1,04816921   | 1,115234684  | -0,06706547 |  |
| 202278_s_at  | SPTLC1          | 2,605861638  | 2,672945617  | -0,06708398 |  |
| 202978_s_at  | CREBZF          | 1,269985355  | 1,337086025  | -0,06710067 |  |
| 201522_x_at  | PAR-SN /// SNOF | 4,891899985  | 4,959158161  | -0,06725818 |  |
| 225137_at    | NFATC3          | 2,003776245  | 2,071071048  | -0,0672948  |  |
| 219531_at    | CEP72           | 2,458724341  | 2,526063925  | -0,06733958 |  |
| 205284_at    | URB2            | 2,2992452    | 2,366632651  | -0,06738745 |  |
| 236006_s_at  | AKAP10          | 0,779676066  | 0,847075464  | -0,0673994  |  |
| 212833_at    | SLC25A46        | 4,434840843  | 4,502251705  | -0,06741086 |  |
| 225913_at    | PEAK1           | 2,981056773  | 3,048471686  | -0,06741491 |  |
| 224921_at    | SCAMP2          | 1,331241794  | 1,398700978  | -0,06745918 |  |
| 242905_at    | PNO1            | 1,331241794  | 1,398700978  | -0,06745918 |  |
| 1555256_at   | EVC2            | -1,399512875 | -1,332017329 | -0,06749555 |  |
| 1555962_at   | B3GNT7          | -1,399512875 | -1,332017329 | -0,06749555 |  |
| 1569111_at   | SOX13           | -1,399512875 | -1,332017329 | -0,06749555 |  |
| 1569251_a_at | ZNF333          | -1,399512875 | -1,332017329 | -0,06749555 |  |
| 1570110_at   | -               | -1,399512875 | -1,332017329 | -0,06749555 |  |
| 204664_at    | ALPP            | -1,399512875 | -1,332017329 | -0,06749555 |  |
| 205106_at    | MTCP1 /// MTCP  | -1,399512875 | -1,332017329 | -0,06749555 |  |
| 205460_at    | NPAS2           | -1,399512875 | -1,332017329 | -0,06749555 |  |
| 208518_s_at  | PER2            | -1,399512875 | -1,332017329 | -0,06749555 |  |
| 213905_x_at  | BGN             | -1,399512875 | -1,332017329 | -0,06749555 |  |
| 214480_at    | ETV3            | -1,399512875 | -1,332017329 | -0,06749555 |  |
| 215109_at    | RC3H1           | -1,399512875 | -1,332017329 | -0,06749555 |  |
| 221667_s_at  | HSPB8           | -1,399512875 | -1,332017329 | -0,06749555 |  |
| 222257_s_at  | ACE2            | -1,399512875 | -1,332017329 | -0,06749555 |  |
| 228995_at    | CAMSAP1         | -1,399512875 | -1,332017329 | -0,06749555 |  |
| 231285_at    | -               | -1,399512875 | -1,332017329 | -0,06749555 |  |
| 234046_at    | -               | -1,399512875 | -1,332017329 | -0,06749555 |  |
| 241499_at    | ZNF621          | -1,399512875 | -1,332017329 | -0,06749555 |  |
| 244589_at    | -               | -1,399512875 | -1,332017329 | -0,06749555 |  |
| 38710_at     | OTUB1           | 3,7102067    | 3,777715399  | -0,0675087  |  |
| 200976_s_at  | TAX1BP1         | 4,557096411  | 4,624630085  | -0,06753367 |  |
| 204951_at    | RHOH            | 0,57058931   | 0,638150376  | -0,06756107 |  |
| 214866_at    | PLAUR           | 0,57058931   | 0,638150376  | -0,06756107 |  |
| 239124_at    | -               | 0,57058931   | 0,638150376  | -0,06756107 |  |
| 243271_at    | -               | 0,57058931   | 0,638150376  | -0,06756107 |  |
| 209104_s_at  | NHP2            | 6,304081567  | 6,371685383  | -0,06760382 |  |
| 218357_s_at  | TIMM8B          | 5,972427575  | 6,040050651  | -0,06762308 |  |
| 1555595_at   | SCRN3           | -0,325749314 | -0,258114234 | -0,06763508 |  |
| 207747_s_at  | DOK4            | -0,325749314 | -0,258114234 | -0,06763508 |  |
| 215618_at    | RSU1            | -0,325749314 | -0,258114234 | -0,06763508 |  |
| 236688_at    | FRMPD3          | -0,325749314 | -0,258114234 | -0,06763508 |  |
| 237842_at    | MAP7D3          | -0,325749314 | -0,258114234 | -0,06763508 |  |
| 239583_x_at  | PSG5            | -0,325749314 | -0,258114234 | -0,06763508 |  |
| 217309_s_at  | DSCR3           | 1,037706275  | 1,105412836  | -0,06770656 |  |

|              |                |              |              |             |  |
|--------------|----------------|--------------|--------------|-------------|--|
| 227347_x_at  | HES4           | 1,037706275  | 1,105412836  | -0,06770656 |  |
| 218328_at    | COQ4           | 2,114952142  | 2,182705233  | -0,06775309 |  |
| 219123_at    | ZNF232         | 2,114952142  | 2,182705233  | -0,06775309 |  |
| 213011_s_at  | TPI1           | 6,269707952  | 6,337481264  | -0,06777331 |  |
| 201698_s_at  | GATC /// SRSF9 | 5,381596876  | 5,449419352  | -0,06782248 |  |
| 219624_at    | BAG4           | 2,074578432  | 2,14244844   | -0,06787001 |  |
| 225006_x_at  | TH1L           | 4,272544123  | 4,340535652  | -0,06799153 |  |
| 218946_at    | NFU1           | 3,733084098  | 3,801102381  | -0,06801828 |  |
| 201090_x_at  | LOC100288366 / | 7,507167467  | 7,575204844  | -0,06803738 |  |
| 1553388_at   | FAM26D         | -2,64318869  | -2,575129729 | -0,06805896 |  |
| 1554612_at   | KIAA0226       | -2,64318869  | -2,575129729 | -0,06805896 |  |
| 1555316_a_at | KCNH7          | -2,64318869  | -2,575129729 | -0,06805896 |  |
| 1559577_at   | FCN2           | -2,64318869  | -2,575129729 | -0,06805896 |  |
| 1562762_at   | C3orf56        | -2,64318869  | -2,575129729 | -0,06805896 |  |
| 1564004_at   | -              | -2,64318869  | -2,575129729 | -0,06805896 |  |
| 1566665_at   | CCDC168        | -2,64318869  | -2,575129729 | -0,06805896 |  |
| 1567249_at   | OR9A1P         | -2,64318869  | -2,575129729 | -0,06805896 |  |
| 1567443_x_at | PSEN1          | -2,64318869  | -2,575129729 | -0,06805896 |  |
| 1567860_at   | -              | -2,64318869  | -2,575129729 | -0,06805896 |  |
| 204422_s_at  | FGF2           | -2,64318869  | -2,575129729 | -0,06805896 |  |
| 207709_at    | PRKAA2         | -2,64318869  | -2,575129729 | -0,06805896 |  |
| 213307_at    | SHANK2         | -2,64318869  | -2,575129729 | -0,06805896 |  |
| 214420_s_at  | CYP2C9         | -2,64318869  | -2,575129729 | -0,06805896 |  |
| 216062_at    | LOC100507164   | -2,64318869  | -2,575129729 | -0,06805896 |  |
| 230230_at    | PTPN4          | -2,64318869  | -2,575129729 | -0,06805896 |  |
| 230289_at    | EPB41L1        | -2,64318869  | -2,575129729 | -0,06805896 |  |
| 232746_at    | CXCR7          | -2,64318869  | -2,575129729 | -0,06805896 |  |
| 235881_at    | FMNL2          | -2,64318869  | -2,575129729 | -0,06805896 |  |
| 237195_at    | -              | -2,64318869  | -2,575129729 | -0,06805896 |  |
| 237953_at    | -              | -2,64318869  | -2,575129729 | -0,06805896 |  |
| 238799_at    | ATP5S          | -2,64318869  | -2,575129729 | -0,06805896 |  |
| 239980_at    | -              | -2,64318869  | -2,575129729 | -0,06805896 |  |
| 240034_at    | -              | -2,64318869  | -2,575129729 | -0,06805896 |  |
| 240606_at    | -              | -2,64318869  | -2,575129729 | -0,06805896 |  |
| 242228_at    | -              | -2,64318869  | -2,575129729 | -0,06805896 |  |
| 243748_at    | -              | -2,64318869  | -2,575129729 | -0,06805896 |  |
| 244213_at    | -              | -2,64318869  | -2,575129729 | -0,06805896 |  |
| 209963_s_at  | EPOR           | 2,47626436   | 2,544354523  | -0,06809016 |  |
| 218827_s_at  | CEP192         | 2,030406107  | 2,098562556  | -0,06815645 |  |
| 201081_s_at  | PIP4K2B        | 0,767063567  | 0,835239052  | -0,06817549 |  |
| 235406_x_at  | TMEM161B-AS1   | 0,181384709  | 0,249604176  | -0,06821947 |  |
| 240446_at    | -              | 0,181384709  | 0,249604176  | -0,06821947 |  |
| 243435_at    | KCNQ1OT1       | 0,181384709  | 0,249604176  | -0,06821947 |  |
| 210112_at    | HPS1           | 2,790121796  | 2,858346012  | -0,06822422 |  |
| 227114_at    | RNF214         | 1,381753566  | 1,450051551  | -0,06829798 |  |
| 221514_at    | UTP14A         | 2,764969948  | 2,833274877  | -0,06830493 |  |
| 228122_at    | CCDC66         | 1,177702228  | 1,246149888  | -0,06844766 |  |
| 209212_s_at  | KLF5           | 0,555999837  | 0,624460759  | -0,06846092 |  |
| 201040_at    | GNAI2          | 2,102456302  | 2,170981159  | -0,06852486 |  |
| 209171_at    | ITPA           | 4,49104529   | 4,559576852  | -0,06853156 |  |
| 219238_at    | PIGV           | 1,85379461   | 1,922365006  | -0,0685704  |  |
| 221751_at    | PANK3          | 4,321346382  | 4,389920115  | -0,06857373 |  |
| 1553743_at   | LOC100506290 / | 1,897847661  | 1,966439221  | -0,06859156 |  |
| 1555731_a_at | AP1S3          | -3,342483913 | -3,273861381 | -0,06862253 |  |
| 1562480_at   | -              | -3,342483913 | -3,273861381 | -0,06862253 |  |
| 207107_at    | RPE65          | -3,342483913 | -3,273861381 | -0,06862253 |  |

|              |                 |              |              |             |  |
|--------------|-----------------|--------------|--------------|-------------|--|
| 232415_at    | PCDHB13         | -3,342483913 | -3,273861381 | -0,06862253 |  |
| 201284_s_at  | APEH            | 2,344516784  | 2,413157372  | -0,06864059 |  |
| 208541_x_at  | TFAM            | 1,607231019  | 1,675891488  | -0,06866047 |  |
| 1559108_at   | VPS53           | -0,148196756 | -0,079522948 | -0,06867381 |  |
| 213636_at    | KIAA1045        | -0,148196756 | -0,079522948 | -0,06867381 |  |
| 214002_at    | MYL6            | -0,148196756 | -0,079522948 | -0,06867381 |  |
| 216079_at    | EPM2A           | -0,148196756 | -0,079522948 | -0,06867381 |  |
| 220848_x_at  | OBP2A           | -0,148196756 | -0,079522948 | -0,06867381 |  |
| 228761_at    | SCRT1           | -0,148196756 | -0,079522948 | -0,06867381 |  |
| 231003_at    | SLC35B3         | -0,148196756 | -0,079522948 | -0,06867381 |  |
| 243465_at    | -               | -0,148196756 | -0,079522948 | -0,06867381 |  |
| 222510_s_at  | MKRN2           | 1,659347917  | 1,728030156  | -0,06868224 |  |
| 209403_at    | LOC100510707 /  | 1,021868205  | 1,090553537  | -0,06868533 |  |
| 212790_x_at  | RPL13A /// RPL1 | 8,023100874  | 8,091787394  | -0,06868652 |  |
| 208614_s_at  | FLNB            | 3,136227209  | 3,204982027  | -0,06875482 |  |
| 212224_at    | ALDH1A1         | 3,605176459  | 3,673964604  | -0,06878814 |  |
| 202408_s_at  | PRPF31          | 4,464437915  | 4,533260944  | -0,06882303 |  |
| 226617_at    | ARL5A           | 4,514815228  | 4,583653734  | -0,06883851 |  |
| 205803_s_at  | TRPC1           | 1,493160564  | 1,562009954  | -0,06884939 |  |
| 215747_s_at  | RCC1            | 1,493160564  | 1,562009954  | -0,06884939 |  |
| 204561_x_at  | APOC2 /// APOC  | 0,30867765   | 0,377530647  | -0,068853   |  |
| 226140_s_at  | OTUD1           | 0,30867765   | 0,377530647  | -0,068853   |  |
| 221536_s_at  | LSG1            | 3,24026957   | 3,309203139  | -0,06893357 |  |
| 212279_at    | TMEM97          | 3,095191939  | 3,164168347  | -0,06897641 |  |
| 203661_s_at  | TMOD1           | 1,168140757  | 1,23718272   | -0,06904196 |  |
| 238164_at    | LOC100507213    | 1,168140757  | 1,23718272   | -0,06904196 |  |
| 214542_x_at  | HIST1H2AG /// H | 3,112743591  | 3,181801492  | -0,0690579  |  |
| 204350_s_at  | MED7            | 2,652894659  | 2,721978587  | -0,06908393 |  |
| 217952_x_at  | PHF3            | 2,845159691  | 2,914267328  | -0,06910764 |  |
| 203462_x_at  | EIF3B           | 4,942904414  | 5,012029981  | -0,06912557 |  |
| 227904_at    | AZI2            | 1,889144008  | 1,958277216  | -0,06913321 |  |
| 213279_at    | DHRS1           | 2,516380342  | 2,585563171  | -0,06918283 |  |
| 200826_at    | SNRPD2          | 7,367480505  | 7,436665611  | -0,06918511 |  |
| 223181_at    | TIMM21          | 2,774453351  | 2,843651104  | -0,06919775 |  |
| 1554837_a_at | CYP4A11 /// CYP | -0,888496123 | -0,819238336 | -0,06925779 |  |
| 1563290_at   | DNAH3           | -0,888496123 | -0,819238336 | -0,06925779 |  |
| 205495_s_at  | GNLY            | -0,888496123 | -0,819238336 | -0,06925779 |  |
| 206820_at    | AGFG2           | -0,888496123 | -0,819238336 | -0,06925779 |  |
| 235661_at    | POU2F2          | -0,888496123 | -0,819238336 | -0,06925779 |  |
| 237777_at    | PFKFB1          | -0,888496123 | -0,819238336 | -0,06925779 |  |
| 244042_x_at  | -               | -0,888496123 | -0,819238336 | -0,06925779 |  |
| 207332_s_at  | TFRC            | 7,764896315  | 7,834158564  | -0,06926225 |  |
| 1553656_at   | TECTB           | -0,352951799 | -0,283667828 | -0,06928397 |  |
| 1558078_at   | -               | -0,352951799 | -0,283667828 | -0,06928397 |  |
| 207844_at    | IL13            | -0,352951799 | -0,283667828 | -0,06928397 |  |
| 235383_at    | MYO7B           | -0,352951799 | -0,283667828 | -0,06928397 |  |
| 239707_at    | SLC5A10         | -0,352951799 | -0,283667828 | -0,06928397 |  |
| 243459_x_at  | -               | -0,352951799 | -0,283667828 | -0,06928397 |  |
| 207721_x_at  | HINT1           | 4,913162719  | 4,982486434  | -0,06932371 |  |
| 224690_at    | FAM210B         | 4,041366364  | 4,110690475  | -0,06932411 |  |
| 1558673_s_at | ZNF77           | 0,747935635  | 0,817300337  | -0,0693647  |  |
| 202938_x_at  | RRP7A /// RRP7  | 0,425644434  | 0,495031851  | -0,06938742 |  |
| 222567_s_at  | MEX3C           | 0,425644434  | 0,495031851  | -0,06938742 |  |
| 227880_s_at  | LOC100506234 /  | 0,425644434  | 0,495031851  | -0,06938742 |  |
| 227946_at    | OSBPL7          | 0,425644434  | 0,495031851  | -0,06938742 |  |
| 241878_at    | -               | 0,425644434  | 0,495031851  | -0,06938742 |  |

|              |                 |              |              |             |  |
|--------------|-----------------|--------------|--------------|-------------|--|
| 204622_x_at  | NR4A2           | 2,009141686  | 2,078620836  | -0,06947915 |  |
| 230240_at    | -               | 2,009141686  | 2,078620836  | -0,06947915 |  |
| 209190_s_at  | DIAPH1          | 5,133367485  | 5,202876073  | -0,06950859 |  |
| 55093_at     | CHPF2           | 2,313410241  | 2,382985886  | -0,06957565 |  |
| 206362_x_at  | MAP3K10         | 1,360921491  | 1,43051703   | -0,06959554 |  |
| 227257_s_at  | CACUL1          | 2,669932407  | 2,739547836  | -0,06961543 |  |
| 218263_s_at  | ZBED5           | 3,046446467  | 3,116064987  | -0,06961852 |  |
| 218129_s_at  | NFYB            | 2,084778276  | 2,154405725  | -0,06962745 |  |
| 213399_x_at  | RPN2            | 6,469394836  | 6,539050588  | -0,06965575 |  |
| 210646_x_at  | RPL13A /// RPL1 | 8,038105563  | 8,107864407  | -0,06975884 |  |
| 212297_at    | ATP13A3         | 4,334228758  | 4,404011141  | -0,06978238 |  |
| 223503_at    | TMEM163         | 3,562021138  | 3,631821253  | -0,06980011 |  |
| 227477_at    | ZMYND19         | 3,776205896  | 3,846031735  | -0,06982584 |  |
| 1563074_at   | LOC255654       | 0,533835206  | 0,603679647  | -0,06984444 |  |
| 207321_s_at  | ABCB9           | 0,533835206  | 0,603679647  | -0,06984444 |  |
| 203577_at    | GTF2H4          | 2,292660284  | 2,362515214  | -0,06985493 |  |
| 206116_s_at  | TPM1            | 3,154500615  | 3,22439681   | -0,0698962  |  |
| 227271_at    | FGF11           | 1,153678675  | 1,223626587  | -0,06994791 |  |
| 208581_x_at  | MT1X            | 5,298583635  | 5,368580179  | -0,06999654 |  |
| 225096_at    | C17orf79        | 3,819603766  | 3,889604025  | -0,07000026 |  |
| 228445_at    | AIFM2           | 0,152582607  | 0,222599095  | -0,07001649 |  |
| 238570_at    | -               | 0,152582607  | 0,222599095  | -0,07001649 |  |
| 239058_at    | -               | 0,152582607  | 0,222599095  | -0,07001649 |  |
| 211256_x_at  | BTN2A1          | 1,874520207  | 1,944570415  | -0,07005021 |  |
| 208903_at    | RPS28           | 1,473887017  | 1,543943227  | -0,07005621 |  |
| 222521_x_at  | NDUFC2 /// NDU  | 1,473887017  | 1,543943227  | -0,07005621 |  |
| 205514_at    | ZNF415          | 0,917308734  | 0,987376598  | -0,07006786 |  |
| 208416_s_at  | SPTB            | 0,917308734  | 0,987376598  | -0,07006786 |  |
| 213446_s_at  | IQGAP1          | 0,917308734  | 0,987376598  | -0,07006786 |  |
| 206992_s_at  | ATP5S           | 1,829737795  | 1,899812471  | -0,07007468 |  |
| 1553640_at   | XKR6            | -0,172274514 | -0,102100538 | -0,07017398 |  |
| 1554077_a_at | TMEM53          | -0,172274514 | -0,102100538 | -0,07017398 |  |
| 1562776_at   | LOC339807       | -0,172274514 | -0,102100538 | -0,07017398 |  |
| 201654_s_at  | HSPG2           | -0,172274514 | -0,102100538 | -0,07017398 |  |
| 220708_at    | -               | -0,172274514 | -0,102100538 | -0,07017398 |  |
| 234256_at    | SEBOX           | -0,172274514 | -0,102100538 | -0,07017398 |  |
| 227765_at    | LOC100506365    | 3,48613512   | 3,556324192  | -0,07018907 |  |
| 229886_at    | C5orf34         | 2,382221458  | 2,452428893  | -0,07020744 |  |
| 228077_at    | MRI1            | 5,35892512   | 5,429138169  | -0,07021305 |  |
| 225205_at    | KIF3B           | 2,87191078   | 2,942125533  | -0,07021475 |  |
| 209059_s_at  | EDF1            | 4,158264286  | 4,228489721  | -0,07022544 |  |
| 208641_s_at  | RAC1            | 5,829243814  | 5,899527247  | -0,07028343 |  |
| 214487_s_at  | RAP2A /// RAP2B | 1,780386218  | 1,85068474   | -0,07029852 |  |
| 202628_s_at  | SERPINE1        | 1,073999308  | 1,144305291  | -0,07030598 |  |
| 216960_s_at  | ZNF133          | 1,073999308  | 1,144305291  | -0,07030598 |  |
| 244045_at    | -               | 1,073999308  | 1,144305291  | -0,07030598 |  |
| 220933_s_at  | ZCCHC6          | 2,732900676  | 2,803210557  | -0,07030988 |  |
| 223112_s_at  | NDUFB10         | 4,995887722  | 5,066200596  | -0,07031287 |  |
| 201840_at    | NEDD8           | 6,059448305  | 6,12976965   | -0,07032135 |  |
| 211918_x_at  | PAPPA2          | 0,822971223  | 0,893473268  | -0,07050204 |  |
| 211254_x_at  | RHAG            | 6,154286309  | 6,224834032  | -0,07054772 |  |
| 220661_s_at  | ZNF692          | 2,107467633  | 2,17802703   | -0,0705594  |  |
| 213958_at    | CD6             | 1,143956113  | 1,214517879  | -0,07056177 |  |
| 225945_at    | ZNF655          | 3,313655555  | 3,384231608  | -0,07057605 |  |
| 218587_s_at  | POGLUT1         | 3,105247586  | 3,175947691  | -0,07070011 |  |
| 228824_s_at  | PTGR1           | 2,520143371  | 2,590852465  | -0,07070909 |  |

|              |                 |              |              |             |  |
|--------------|-----------------|--------------|--------------|-------------|--|
| 211075_s_at  | CD47            | 5,145904033  | 5,216627661  | -0,07072363 |  |
| 212196_at    | IL6ST           | 3,176127502  | 3,246908183  | -0,07078068 |  |
| 1569312_at   | -               | 0,518867317  | 0,589657387  | -0,07079007 |  |
| 237536_at    | MAPT-AS1        | 0,518867317  | 0,589657387  | -0,07079007 |  |
| 222743_s_at  | C11orf71        | 1,210676994  | 1,281471383  | -0,07079439 |  |
| 218614_at    | C12orf35        | 2,402750389  | 2,473581079  | -0,07083069 |  |
| 227608_at    | DAP3            | 1,987559146  | 2,058399602  | -0,07084046 |  |
| 202333_s_at  | UBE2B           | 3,893994642  | 3,964864009  | -0,07086937 |  |
| 218346_s_at  | SESN1           | 2,243430036  | 2,314300277  | -0,07087024 |  |
| 236351_at    | LOC389023       | 2,208874124  | 2,27978304   | -0,07090892 |  |
| 228829_at    | ATF7            | 1,339784194  | 1,410714371  | -0,07093018 |  |
| 223396_at    | TMEM60          | 3,45992606   | 3,530865925  | -0,07093986 |  |
| 204806_x_at  | HLA-F           | 3,685285822  | 3,756298754  | -0,07101293 |  |
| 40569_at     | MZF1            | 2,241151882  | 2,312166977  | -0,07101509 |  |
| 218910_at    | ANO10           | 0,984222186  | 1,055274826  | -0,07105264 |  |
| 222647_at    | SLC35C1         | 0,984222186  | 1,055274826  | -0,07105264 |  |
| 236679_x_at  | -               | 0,984222186  | 1,055274826  | -0,07105264 |  |
| 220992_s_at  | TRMT1L          | 2,305800198  | 2,376875125  | -0,07107493 |  |
| 1562770_at   | -               | -0,926850548 | -0,855751026 | -0,07109952 |  |
| 205724_at    | PKP1            | -0,926850548 | -0,855751026 | -0,07109952 |  |
| 220314_at    | HSFX1 /// HSFX2 | -0,926850548 | -0,855751026 | -0,07109952 |  |
| 228705_at    | CAPN12          | -0,926850548 | -0,855751026 | -0,07109952 |  |
| 230463_at    | -               | -0,926850548 | -0,855751026 | -0,07109952 |  |
| 231158_x_at  | PTBP1           | -0,926850548 | -0,855751026 | -0,07109952 |  |
| 231672_at    | -               | -0,926850548 | -0,855751026 | -0,07109952 |  |
| 231942_at    | LOC643837       | -0,926850548 | -0,855751026 | -0,07109952 |  |
| 237445_at    | -               | -0,926850548 | -0,855751026 | -0,07109952 |  |
| 239678_at    | -               | -0,926850548 | -0,855751026 | -0,07109952 |  |
| 1556253_s_at | -               | -2,479842156 | -2,408705138 | -0,07113702 |  |
| 1556630_at   | CASC2           | -2,479842156 | -2,408705138 | -0,07113702 |  |
| 1556886_a_at | LAYN            | -2,479842156 | -2,408705138 | -0,07113702 |  |
| 1557641_at   | -               | -2,479842156 | -2,408705138 | -0,07113702 |  |
| 1558706_a_at | ATOH8           | -2,479842156 | -2,408705138 | -0,07113702 |  |
| 1558931_at   | LRRC16A         | -2,479842156 | -2,408705138 | -0,07113702 |  |
| 1559724_at   | -               | -2,479842156 | -2,408705138 | -0,07113702 |  |
| 1568687_s_at | ATP8B5P         | -2,479842156 | -2,408705138 | -0,07113702 |  |
| 1569672_at   | -               | -2,479842156 | -2,408705138 | -0,07113702 |  |
| 211196_at    | DBT             | -2,479842156 | -2,408705138 | -0,07113702 |  |
| 212182_at    | NUDT4 /// NUDT3 | -2,479842156 | -2,408705138 | -0,07113702 |  |
| 217076_s_at  | HOXD3           | -2,479842156 | -2,408705138 | -0,07113702 |  |
| 220830_at    | IMPG2           | -2,479842156 | -2,408705138 | -0,07113702 |  |
| 228147_at    | SEPT7P2         | -2,479842156 | -2,408705138 | -0,07113702 |  |
| 229530_at    | GUCY1A3         | -2,479842156 | -2,408705138 | -0,07113702 |  |
| 235981_at    | C8orf22         | -2,479842156 | -2,408705138 | -0,07113702 |  |
| 237049_at    | -               | -2,479842156 | -2,408705138 | -0,07113702 |  |
| 240140_s_at  | LRIG1           | -2,479842156 | -2,408705138 | -0,07113702 |  |
| 240556_at    | DCN             | -2,479842156 | -2,408705138 | -0,07113702 |  |
| 241160_at    | -               | -2,479842156 | -2,408705138 | -0,07113702 |  |
| 241592_at    | LOC100507594    | -2,479842156 | -2,408705138 | -0,07113702 |  |
| 242724_x_at  | -               | -2,479842156 | -2,408705138 | -0,07113702 |  |
| 243379_at    | -               | -2,479842156 | -2,408705138 | -0,07113702 |  |
| 244056_at    | SFTA2           | -2,479842156 | -2,408705138 | -0,07113702 |  |
| 227161_at    | NOM1            | 2,540666392  | 2,611817827  | -0,07115143 |  |
| 212582_at    | OSBPL8          | 4,533553167  | 4,604723207  | -0,07117004 |  |
| 213275_x_at  | CTSB            | 2,427005622  | 2,498185745  | -0,07118012 |  |
| 218149_s_at  | ZNF395          | 2,427005622  | 2,498185745  | -0,07118012 |  |



|              |                 |              |              |             |  |
|--------------|-----------------|--------------|--------------|-------------|--|
| 202029_x_at  | RPL38           | 7,431384423  | 7,502636672  | -0,07125225 |  |
| 216696_s_at  | PRODH2          | 0,133056859  | 0,204310755  | -0,0712539  |  |
| 218914_at    | RRNAD1          | 0,133056859  | 0,204310755  | -0,0712539  |  |
| 243617_at    | ZNF827          | 0,133056859  | 0,204310755  | -0,0712539  |  |
| 212680_x_at  | PPP1R14B        | 4,379468341  | 4,450819624  | -0,07135128 |  |
| 223446_s_at  | DTNBP1          | 2,536956583  | 2,608344689  | -0,07138811 |  |
| 221535_at    | LSG1            | 2,874852734  | 2,946258252  | -0,07140552 |  |
| 1554410_a_at | LOC653375 /// W | 2,05655332   | 2,127967638  | -0,07141432 |  |
| 235953_at    | ZNF610          | 0,715481152  | 0,786897721  | -0,07141657 |  |
| 238627_at    | TRAPPC2L        | 0,715481152  | 0,786897721  | -0,07141657 |  |
| 200759_x_at  | NFE2L1          | 2,852640442  | 2,924079008  | -0,07143857 |  |
| 225070_at    | NUS1            | 4,093441556  | 4,164893351  | -0,07145179 |  |
| 214486_x_at  | CFLAR           | 1,894952274  | 1,966439221  | -0,07148695 |  |
| 222518_at    | ARFGEF2         | 1,894952274  | 1,966439221  | -0,07148695 |  |
| 226629_at    | SLC43A2         | 1,129248302  | 1,200746069  | -0,07149777 |  |
| 210005_at    | GART            | 3,63931383   | 3,710868933  | -0,0715551  |  |
| 209176_at    | SEC23IP         | 1,850809354  | 1,922365006  | -0,07155565 |  |
| 221693_s_at  | MRPS18A         | 3,828735867  | 3,900294538  | -0,07155867 |  |
| 225396_at    | RBBP4           | 2,478200152  | 2,549796788  | -0,07159664 |  |
| 242640_at    | C19orf55        | 1,560488174  | 1,632095957  | -0,07160778 |  |
| 201113_at    | TUFM            | 5,509199609  | 5,580826895  | -0,07162729 |  |
| 230608_at    | C1orf182        | 1,390002893  | 1,461646549  | -0,07164366 |  |
| 238915_at    | -               | 1,390002893  | 1,461646549  | -0,07164366 |  |
| 224318_s_at  | KANSL3          | 3,343695493  | 3,415371412  | -0,07167592 |  |
| 213019_at    | RANBP6          | 2,159061673  | 2,230931691  | -0,07187002 |  |
| 203710_at    | ITPR1           | 2,708372067  | 2,780243895  | -0,07187183 |  |
| 226773_at    | -               | 2,38635068   | 2,458228496  | -0,07187782 |  |
| 203823_at    | RGS3            | -0,394749123 | -0,322870281 | -0,07187884 |  |
| 228375_at    | IGSF11          | -0,394749123 | -0,322870281 | -0,07187884 |  |
| 229837_s_at  | KCTD5           | -0,394749123 | -0,322870281 | -0,07187884 |  |
| 233519_at    | -               | -0,394749123 | -0,322870281 | -0,07187884 |  |
| 234267_at    | LOC100507584    | -0,394749123 | -0,322870281 | -0,07187884 |  |
| 235643_at    | SAMD9L          | -0,394749123 | -0,322870281 | -0,07187884 |  |
| 239320_at    | LRRC4B          | -0,394749123 | -0,322870281 | -0,07187884 |  |
| 204129_at    | BCL9            | 0,888485433  | 0,960386719  | -0,07190129 |  |
| 226308_at    | HAUS8           | 3,086335384  | 3,158242412  | -0,07190703 |  |
| 1554021_a_at | ZNF12           | 1,844820248  | 1,916759838  | -0,07193959 |  |
| 1552716_at   | SPEF2           | 0,384950573  | 0,456918297  | -0,07196772 |  |
| 229757_at    | -               | 2,259277178  | 2,331254065  | -0,07197689 |  |
| 1561640_at   | -               | 0,928678725  | 1,000684521  | -0,0720058  |  |
| 213081_at    | ZBTB22          | 0,928678725  | 1,000684521  | -0,0720058  |  |
| 240263_at    | -               | 0,928678725  | 1,000684521  | -0,0720058  |  |
| 202511_s_at  | ATG5            | 4,464437915  | 4,536462591  | -0,07202468 |  |
| 209808_x_at  | ING1            | 2,225103271  | 2,297144887  | -0,07204162 |  |
| 232065_x_at  | CENPL           | 2,553576109  | 2,625627364  | -0,07205125 |  |
| 203162_s_at  | KATNB1          | 3,497632487  | 3,569779975  | -0,07214749 |  |
| 1558009_at   | SLC1A2          | -3,250025915 | -3,177802286 | -0,07222363 |  |
| 1560823_at   | LOC340017       | -3,250025915 | -3,177802286 | -0,07222363 |  |
| 1561437_at   | -               | -3,250025915 | -3,177802286 | -0,07222363 |  |
| 210721_s_at  | PAK7            | -3,250025915 | -3,177802286 | -0,07222363 |  |
| 216441_at    | -               | -3,250025915 | -3,177802286 | -0,07222363 |  |
| 218541_s_at  | C8orf4          | -3,250025915 | -3,177802286 | -0,07222363 |  |
| 222322_at    | -               | -3,250025915 | -3,177802286 | -0,07222363 |  |
| 237422_at    | -               | -3,250025915 | -3,177802286 | -0,07222363 |  |
| 240463_at    | -               | -3,250025915 | -3,177802286 | -0,07222363 |  |
| 225211_at    | PVRL1           | 0,496120222  | 0,568365095  | -0,07224487 |  |

|              |                |              |              |             |  |
|--------------|----------------|--------------|--------------|-------------|--|
| 240030_at    | COMMD6         | 0,496120222  | 0,568365095  | -0,07224487 |  |
| 240270_x_at  | -              | 0,496120222  | 0,568365095  | -0,07224487 |  |
| 219071_x_at  | FAM203A        | 2,726400382  | 2,798646381  | -0,072246   |  |
| 230781_at    | LOC100505875   | 5,485576795  | 5,55782822   | -0,07225143 |  |
| 202479_s_at  | TRIB2          | 1,187200746  | 1,259496994  | -0,07229625 |  |
| 216524_x_at  | -              | 1,748661581  | 1,820984782  | -0,0723232  |  |
| 202049_s_at  | ZMYM4          | 2,406821352  | 2,479296438  | -0,07247509 |  |
| 221632_s_at  | WDR4           | 2,406821352  | 2,479296438  | -0,07247509 |  |
| 238952_x_at  | ZNF829         | 3,391728033  | 3,464222256  | -0,07249422 |  |
| 214132_at    | ATP5C1         | 1,434549838  | 1,507116528  | -0,07256669 |  |
| 218762_at    | ZNF574         | 1,434549838  | 1,507116528  | -0,07256669 |  |
| 229305_at    | MLF1IP         | 1,434549838  | 1,507116528  | -0,07256669 |  |
| 222389_s_at  | WAC            | 3,462861802  | 3,535445117  | -0,07258332 |  |
| 238069_at    | LOC100506090   | 1,960118853  | 2,032717854  | -0,072599   |  |
| 225553_at    | -              | 3,53158484   | 3,604188755  | -0,07260391 |  |
| 200853_at    | H2AFZ          | 6,663183334  | 6,735811734  | -0,0726284  |  |
| 218882_s_at  | WDR3           | 4,332624738  | 4,405262601  | -0,07263786 |  |
| 204388_s_at  | MAOA           | 3,111496958  | 3,184136378  | -0,07263942 |  |
| 209233_at    | EMG1           | 4,928818144  | 5,001477105  | -0,07265896 |  |
| 223974_at    | MGC11082       | 0,695652136  | 0,768343791  | -0,07269165 |  |
| 235852_at    | STON2          | 2,646022818  | 2,718761062  | -0,07273824 |  |
| 217225_x_at  | NOMO1 /// NOMO | 5,214280103  | 5,287020061  | -0,07273996 |  |
| 38707_r_at   | E2F4           | 2,718233611  | 2,791007185  | -0,07277357 |  |
| 224462_s_at  | CHCHD6         | 2,213529682  | 2,286318242  | -0,07278856 |  |
| 219158_s_at  | NAA15          | 3,196259441  | 3,269073685  | -0,07281424 |  |
| 228238_at    | GAS5 /// SNORD | 3,705256844  | 3,778101865  | -0,07284502 |  |
| 1555074_a_at | KCNH5          | -2,359436556 | -2,286583451 | -0,07285311 |  |
| 1561288_at   | LINC00536      | -2,359436556 | -2,286583451 | -0,07285311 |  |
| 201130_s_at  | CDH1           | -2,359436556 | -2,286583451 | -0,07285311 |  |
| 202359_s_at  | SNX19          | -2,359436556 | -2,286583451 | -0,07285311 |  |
| 205729_at    | OSMR           | -2,359436556 | -2,286583451 | -0,07285311 |  |
| 206069_s_at  | ACADL          | -2,359436556 | -2,286583451 | -0,07285311 |  |
| 209098_s_at  | JAG1           | -2,359436556 | -2,286583451 | -0,07285311 |  |
| 209976_s_at  | CYP2E1         | -2,359436556 | -2,286583451 | -0,07285311 |  |
| 214601_at    | TPH1           | -2,359436556 | -2,286583451 | -0,07285311 |  |
| 217366_at    | -              | -2,359436556 | -2,286583451 | -0,07285311 |  |
| 221661_at    | SLC22A7        | -2,359436556 | -2,286583451 | -0,07285311 |  |
| 223829_at    | TKTL2          | -2,359436556 | -2,286583451 | -0,07285311 |  |
| 228121_at    | TGFB2          | -2,359436556 | -2,286583451 | -0,07285311 |  |
| 231466_at    | FAM71F1        | -2,359436556 | -2,286583451 | -0,07285311 |  |
| 232059_at    | DSCAML1        | -2,359436556 | -2,286583451 | -0,07285311 |  |
| 233062_at    | -              | -2,359436556 | -2,286583451 | -0,07285311 |  |
| 233670_at    | -              | -2,359436556 | -2,286583451 | -0,07285311 |  |
| 233677_at    | -              | -2,359436556 | -2,286583451 | -0,07285311 |  |
| 234613_at    | -              | -2,359436556 | -2,286583451 | -0,07285311 |  |
| 239956_at    | -              | -2,359436556 | -2,286583451 | -0,07285311 |  |
| 240007_at    | -              | -2,359436556 | -2,286583451 | -0,07285311 |  |
| 240880_at    | -              | -2,359436556 | -2,286583451 | -0,07285311 |  |
| 242285_at    | -              | -2,359436556 | -2,286583451 | -0,07285311 |  |
| 242629_at    | RAB3B          | -2,359436556 | -2,286583451 | -0,07285311 |  |
| 204477_at    | RABIF          | 1,69307511   | 1,765933685  | -0,07285857 |  |
| 209055_s_at  | CDC5L          | 4,012938265  | 4,085930792  | -0,07299253 |  |
| 1554694_at   | CCNY           | -1,688127507 | -1,615132408 | -0,0729951  |  |
| 1566834_at   | -              | -1,688127507 | -1,615132408 | -0,0729951  |  |
| 201137_s_at  | HLA-DPB1       | -1,688127507 | -1,615132408 | -0,0729951  |  |
| 204964_s_at  | SSPN           | -1,688127507 | -1,615132408 | -0,0729951  |  |

|              |                 |              |              |             |  |
|--------------|-----------------|--------------|--------------|-------------|--|
| 206816_s_at  | SPAG8           | -1,688127507 | -1,615132408 | -0,0729951  |  |
| 209785_s_at  | PLA2G4C         | -1,688127507 | -1,615132408 | -0,0729951  |  |
| 220820_at    | -               | -1,688127507 | -1,615132408 | -0,0729951  |  |
| 227550_at    | GFRA1           | -1,688127507 | -1,615132408 | -0,0729951  |  |
| 230904_at    | FSD1L           | -1,688127507 | -1,615132408 | -0,0729951  |  |
| 231563_at    | LOC100505824 /  | -1,688127507 | -1,615132408 | -0,0729951  |  |
| 231701_s_at  | SHMT1           | -1,688127507 | -1,615132408 | -0,0729951  |  |
| 236749_at    | MNT             | -1,688127507 | -1,615132408 | -0,0729951  |  |
| 240177_at    | -               | -1,688127507 | -1,615132408 | -0,0729951  |  |
| 240492_at    | -               | -1,688127507 | -1,615132408 | -0,0729951  |  |
| 241107_at    | -               | -1,688127507 | -1,615132408 | -0,0729951  |  |
| 242746_at    | KLHDC10         | -1,688127507 | -1,615132408 | -0,0729951  |  |
| 223539_s_at  | SERF1A /// SERP | 2,069451339  | 2,14244844   | -0,0729971  |  |
| 226242_at    | C1orf131        | 4,275330031  | 4,348364282  | -0,07303425 |  |
| 65588_at     | LOC388796       | 3,805796305  | 3,878833703  | -0,0730374  |  |
| 204957_at    | ORC5            | 3,891817836  | 3,964864009  | -0,07304617 |  |
| 221688_s_at  | IMP3            | 4,114129991  | 4,187181377  | -0,07305139 |  |
| 226079_at    | FLYWCH2         | 1,426552034  | 1,499637023  | -0,07308499 |  |
| 235694_at    | TCFL5           | 1,104397092  | 1,177496821  | -0,07309973 |  |
| 211686_s_at  | MAK16           | 4,281994342  | 4,355114902  | -0,07312056 |  |
| 217356_s_at  | LOC100652805 /  | 5,685637449  | 5,758783546  | -0,0731461  |  |
| 218235_s_at  | UTP11L          | 5,005651     | 5,078804007  | -0,07315301 |  |
| 243924_at    | LOC100506930    | 0,103263601  | 0,176436073  | -0,07317247 |  |
| 1554442_at   | BEST1           | 1,481627361  | 1,55481039   | -0,07318303 |  |
| 238675_x_at  | BTF3L4          | 1,481627361  | 1,55481039   | -0,07318303 |  |
| 1552622_s_at | LOC441259 /// P | 0,480753764  | 0,553993624  | -0,07323986 |  |
| 229962_at    | LRRC37A3        | 0,480753764  | 0,553993624  | -0,07323986 |  |
| 235878_at    | TAF1B           | 0,480753764  | 0,553993624  | -0,07323986 |  |
| 201807_at    | VPS26A          | 4,818544611  | 4,891829281  | -0,07328467 |  |
| 217855_x_at  | SDF4            | 3,801937331  | 3,875225653  | -0,07328832 |  |
| 203298_s_at  | JARID2          | 4,560298057  | 4,63362748   | -0,07332942 |  |
| 200019_s_at  | FAU             | 7,397838143  | 7,471193828  | -0,07335568 |  |
| 221580_s_at  | MIR1304 /// SNO | 4,789606972  | 4,862972786  | -0,07336581 |  |
| 208503_s_at  | GATAD1          | 2,061726373  | 2,135226207  | -0,07349983 |  |
| 218708_at    | NXT1            | 4,042675065  | 4,116203325  | -0,07352826 |  |
| 217274_x_at  | MYL4            | 4,627250808  | 4,70080431   | -0,0735535  |  |
| 226606_s_at  | GTPBP5          | 0,682279745  | 0,755840599  | -0,07356085 |  |
| 213719_s_at  | SMARCA4         | 0,359971644  | 0,433557298  | -0,07358565 |  |
| 214991_s_at  | PIGO            | 0,359971644  | 0,433557298  | -0,07358565 |  |
| 226836_at    | SFT2D1          | 0,359971644  | 0,433557298  | -0,07358565 |  |
| 239969_at    | -               | 0,359971644  | 0,433557298  | -0,07358565 |  |
| 1553199_at   | DCAF4L2         | -3,212234735 | -3,138626879 | -0,07360786 |  |
| 1553792_at   | KIAA1109        | -3,212234735 | -3,138626879 | -0,07360786 |  |
| 1554550_at   | KIAA1430        | -3,212234735 | -3,138626879 | -0,07360786 |  |
| 204845_s_at  | ENPEP           | -3,212234735 | -3,138626879 | -0,07360786 |  |
| 204940_at    | PLN             | -3,212234735 | -3,138626879 | -0,07360786 |  |
| 231709_x_at  | -               | -3,212234735 | -3,138626879 | -0,07360786 |  |
| 234833_at    | -               | -3,212234735 | -3,138626879 | -0,07360786 |  |
| 241061_at    | -               | -3,212234735 | -3,138626879 | -0,07360786 |  |
| 226082_s_at  | SCAF4           | 4,059581026  | 4,133220924  | -0,0736399  |  |
| 211182_x_at  | LOC100506403 /  | -0,423248115 | -0,34958478  | -0,07366334 |  |
| 221121_at    | CXorf48         | -0,423248115 | -0,34958478  | -0,07366334 |  |
| 221447_s_at  | GLT8D2          | -0,423248115 | -0,34958478  | -0,07366334 |  |
| 223644_s_at  | CRYGS           | -0,423248115 | -0,34958478  | -0,07366334 |  |
| 231538_at    | C11orf1         | -0,423248115 | -0,34958478  | -0,07366334 |  |
| 244597_at    | -               | -0,423248115 | -0,34958478  | -0,07366334 |  |

|              |              |              |              |             |  |
|--------------|--------------|--------------|--------------|-------------|--|
| 221500_s_at  | STX16        | 3,446146386  | 3,519816196  | -0,07366981 |  |
| 202642_s_at  | TRRAP        | 3,182077878  | 3,255815291  | -0,07373741 |  |
| 201475_x_at  | MARS         | 4,198742362  | 4,272493466  | -0,0737511  |  |
| 204447_at    | PROSAPIP1    | 1,094335495  | 1,16809119   | -0,0737557  |  |
| 230860_at    | CEP19        | 1,094335495  | 1,16809119   | -0,0737557  |  |
| 208374_s_at  | CAPZA1       | 6,06903299   | 6,142807696  | -0,07377471 |  |
| 213638_at    | PHACTR1      | 3,678566904  | 3,75237043   | -0,07380353 |  |
| 228028_at    | FAM59B       | 0,859074518  | 0,932882274  | -0,07380776 |  |
| 229454_at    | BCLAF1       | 0,859074518  | 0,932882274  | -0,07380776 |  |
| 229526_at    | AQP11        | 0,859074518  | 0,932882274  | -0,07380776 |  |
| 243521_at    | ZXDA         | 0,859074518  | 0,932882274  | -0,07380776 |  |
| 209185_s_at  | IRS2         | 2,701760055  | 2,775606361  | -0,07384631 |  |
| 235990_at    | LOC100130987 | 1,163336153  | 1,23718272   | -0,07384657 |  |
| 202740_at    | ABHD14A-ACY1 | 2,197169074  | 2,271023131  | -0,07385406 |  |
| 242931_at    | LONRF3       | 2,197169074  | 2,271023131  | -0,07385406 |  |
| 223230_at    | PRPF38A      | 2,814842651  | 2,888726553  | -0,0738839  |  |
| 209727_at    | GM2A         | 1,814495998  | 1,888402606  | -0,07390661 |  |
| 221207_s_at  | NBEA         | 1,814495998  | 1,888402606  | -0,07390661 |  |
| 203775_at    | SLC25A13     | 4,18754617   | 4,261479522  | -0,07393335 |  |
| 202706_s_at  | UMPS         | 3,277429131  | 3,351366359  | -0,07393723 |  |
| 223244_s_at  | NDUFA12      | 5,840198022  | 5,914194164  | -0,07399614 |  |
| 230440_at    | ZNF469       | 1,523472489  | 1,59747851   | -0,07400602 |  |
| 1557185_at   | TPCN1        | -0,986356909 | -0,912331589 | -0,07402532 |  |
| 1561190_at   | CDKL3        | -0,986356909 | -0,912331589 | -0,07402532 |  |
| 1561532_at   | DACT3-AS1    | -0,986356909 | -0,912331589 | -0,07402532 |  |
| 1570120_at   | -            | -0,986356909 | -0,912331589 | -0,07402532 |  |
| 205502_at    | CYP17A1      | -0,986356909 | -0,912331589 | -0,07402532 |  |
| 208521_at    | OR5I1        | -0,986356909 | -0,912331589 | -0,07402532 |  |
| 232216_at    | YME1L1       | -0,986356909 | -0,912331589 | -0,07402532 |  |
| 236202_at    | -            | -0,986356909 | -0,912331589 | -0,07402532 |  |
| 237640_at    | METTL21D     | -0,986356909 | -0,912331589 | -0,07402532 |  |
| 239517_at    | ITGB6        | -0,986356909 | -0,912331589 | -0,07402532 |  |
| 243709_at    | SLC38A9      | -0,986356909 | -0,912331589 | -0,07402532 |  |
| 244292_at    | -            | -0,986356909 | -0,912331589 | -0,07402532 |  |
| 225755_at    | KLHDC8B      | 3,536237877  | 3,61027875   | -0,07404087 |  |
| 205661_s_at  | FLAD1        | 1,937784532  | 2,011838132  | -0,0740536  |  |
| 208248_x_at  | APLP2        | 4,07117017   | 4,145254615  | -0,07408444 |  |
| 1552605_s_at | LINC00308    | -2,236765673 | -2,162639771 | -0,0741259  |  |
| 1554772_at   | C17orf57     | -2,236765673 | -2,162639771 | -0,0741259  |  |
| 1556460_a_at | ARHGAP22-IT1 | -2,236765673 | -2,162639771 | -0,0741259  |  |
| 1558101_at   | NFIA         | -2,236765673 | -2,162639771 | -0,0741259  |  |
| 1558842_at   | -            | -2,236765673 | -2,162639771 | -0,0741259  |  |
| 1559753_at   | -            | -2,236765673 | -2,162639771 | -0,0741259  |  |
| 1565111_x_at | OFCC1        | -2,236765673 | -2,162639771 | -0,0741259  |  |
| 1565797_at   | DUOX1        | -2,236765673 | -2,162639771 | -0,0741259  |  |
| 1566041_at   | -            | -2,236765673 | -2,162639771 | -0,0741259  |  |
| 1569936_a_at | ZNF664       | -2,236765673 | -2,162639771 | -0,0741259  |  |
| 201556_s_at  | VAMP2        | -2,236765673 | -2,162639771 | -0,0741259  |  |
| 207379_at    | EDIL3        | -2,236765673 | -2,162639771 | -0,0741259  |  |
| 207666_x_at  | SSX3         | -2,236765673 | -2,162639771 | -0,0741259  |  |
| 207780_at    | CYLC2        | -2,236765673 | -2,162639771 | -0,0741259  |  |
| 211219_s_at  | LHX2         | -2,236765673 | -2,162639771 | -0,0741259  |  |
| 216543_at    | LOC100093698 | -2,236765673 | -2,162639771 | -0,0741259  |  |
| 218706_s_at  | GRAMD3       | -2,236765673 | -2,162639771 | -0,0741259  |  |
| 220545_s_at  | TSKS         | -2,236765673 | -2,162639771 | -0,0741259  |  |
| 224158_s_at  | -            | -2,236765673 | -2,162639771 | -0,0741259  |  |

|              |                    |              |              |             |  |
|--------------|--------------------|--------------|--------------|-------------|--|
| 229510_at    | MS4A14             | -2,236765673 | -2,162639771 | -0,0741259  |  |
| 232094_at    | C15orf29           | -2,236765673 | -2,162639771 | -0,0741259  |  |
| 233814_at    | EFNA5              | -2,236765673 | -2,162639771 | -0,0741259  |  |
| 237800_at    | -                  | -2,236765673 | -2,162639771 | -0,0741259  |  |
| 238088_at    | -                  | -2,236765673 | -2,162639771 | -0,0741259  |  |
| 239370_at    | LOC100505633       | -2,236765673 | -2,162639771 | -0,0741259  |  |
| 239846_at    | LOC100506245       | -2,236765673 | -2,162639771 | -0,0741259  |  |
| 240035_at    | -                  | -2,236765673 | -2,162639771 | -0,0741259  |  |
| 241648_at    | -                  | -2,236765673 | -2,162639771 | -0,0741259  |  |
| 242800_at    | NHS                | -2,236765673 | -2,162639771 | -0,0741259  |  |
| 1563521_at   | MOB3B              | -0,234278768 | -0,160136748 | -0,07414202 |  |
| 204476_s_at  | PC                 | -0,234278768 | -0,160136748 | -0,07414202 |  |
| 217119_s_at  | CXCR3              | -0,234278768 | -0,160136748 | -0,07414202 |  |
| 220398_at    | GNPTAB             | -0,234278768 | -0,160136748 | -0,07414202 |  |
| 242281_at    | GLUL               | -0,234278768 | -0,160136748 | -0,07414202 |  |
| 225417_at    | EPC1               | 2,493593689  | 2,567790814  | -0,07419712 |  |
| 234873_x_at  | RPL7A /// SNOR1    | 7,094552764  | 7,168773293  | -0,07422053 |  |
| 204079_at    | TPST2              | 5,109524703  | 5,183751029  | -0,07422633 |  |
| 223227_at    | BBS2               | 2,122398022  | 2,196649505  | -0,07425148 |  |
| 224376_s_at  | C20orf24 /// TGIF1 | 5,849575004  | 5,923831706  | -0,0742567  |  |
| 231907_at    | ABL2               | 2,288253583  | 2,362515214  | -0,07426163 |  |
| 228841_at    | LYRM7              | 3,924130004  | 3,9984201    | -0,0742901  |  |
| 40446_at     | PHF1               | 4,28697245   | 4,361318331  | -0,07434588 |  |
| 1559229_at   | -                  | -1,812418401 | -1,738067356 | -0,07435105 |  |
| 1559372_at   | -                  | -1,812418401 | -1,738067356 | -0,07435105 |  |
| 1561499_at   | -                  | -1,812418401 | -1,738067356 | -0,07435105 |  |
| 1562935_at   | -                  | -1,812418401 | -1,738067356 | -0,07435105 |  |
| 1568650_a_at | -                  | -1,812418401 | -1,738067356 | -0,07435105 |  |
| 205099_s_at  | CCR1               | -1,812418401 | -1,738067356 | -0,07435105 |  |
| 206927_s_at  | GUCY1A2            | -1,812418401 | -1,738067356 | -0,07435105 |  |
| 211980_at    | COL4A1             | -1,812418401 | -1,738067356 | -0,07435105 |  |
| 216923_at    | CDKL5              | -1,812418401 | -1,738067356 | -0,07435105 |  |
| 220216_at    | C8orf44            | -1,812418401 | -1,738067356 | -0,07435105 |  |
| 220475_at    | SLC28A3            | -1,812418401 | -1,738067356 | -0,07435105 |  |
| 220513_at    | KHDC1L             | -1,812418401 | -1,738067356 | -0,07435105 |  |
| 222917_s_at  | TBX3               | -1,812418401 | -1,738067356 | -0,07435105 |  |
| 226252_at    | -                  | -1,812418401 | -1,738067356 | -0,07435105 |  |
| 229311_at    | GKAP1              | -1,812418401 | -1,738067356 | -0,07435105 |  |
| 231053_at    | KCNB1              | -1,812418401 | -1,738067356 | -0,07435105 |  |
| 232159_at    | -                  | -1,812418401 | -1,738067356 | -0,07435105 |  |
| 232276_at    | HS6ST3             | -1,812418401 | -1,738067356 | -0,07435105 |  |
| 235498_at    | LRRIQ3             | -1,812418401 | -1,738067356 | -0,07435105 |  |
| 235950_at    | ZNF688             | -1,812418401 | -1,738067356 | -0,07435105 |  |
| 240388_at    | KRT27              | -1,812418401 | -1,738067356 | -0,07435105 |  |
| 241508_at    | -                  | -1,812418401 | -1,738067356 | -0,07435105 |  |
| 242630_at    | -                  | -1,812418401 | -1,738067356 | -0,07435105 |  |
| 242699_at    | -                  | -1,812418401 | -1,738067356 | -0,07435105 |  |
| 244266_at    | AKR1C1             | -1,812418401 | -1,738067356 | -0,07435105 |  |
| 205204_at    | NMB                | 2,084778276  | 2,159161028  | -0,07438275 |  |
| 243745_at    | -                  | 1,462198073  | 1,536652708  | -0,07445463 |  |
| 210134_x_at  | SHOX2              | 0,083054335  | 0,157549243  | -0,07449491 |  |
| 211360_s_at  | ITPR2              | 0,083054335  | 0,157549243  | -0,07449491 |  |
| 213027_at    | TROVE2             | 3,715139632  | 3,789647959  | -0,07450833 |  |
| 1570410_at   | CYGB               | 0,760715727  | 0,835239052  | -0,07452333 |  |
| 214742_at    | AZI1               | 0,760715727  | 0,835239052  | -0,07452333 |  |
| 203534_at    | LSM1               | 5,284271541  | 5,358795272  | -0,07452373 |  |

|              |                 |              |              |             |  |
|--------------|-----------------|--------------|--------------|-------------|--|
| 44696_at     | TBC1D13         | 2,460683796  | 2,53523821   | -0,07455441 |  |
| 242363_at    | -               | 2,314494121  | 2,389070873  | -0,07457675 |  |
| 239897_at    | BCLAF1          | 1,283332461  | 1,3579181    | -0,07458564 |  |
| 219486_at    | DUS2L           | 2,344516784  | 2,419116683  | -0,0745999  |  |
| 200039_s_at  | PSMB2           | 6,023694176  | 6,098314042  | -0,07461987 |  |
| 217808_s_at  | MAPKAP1         | 2,86748657   | 2,942125533  | -0,07463896 |  |
| 225469_at    | LYRM5           | 2,758612869  | 2,833274877  | -0,07466201 |  |
| 202265_at    | BMI1 /// COMMD  | 4,159471171  | 4,234134575  | -0,0746634  |  |
| 213084_x_at  | RPL23A /// SNOF | 8,172956882  | 8,247623971  | -0,07466709 |  |
| 224160_s_at  | ACAD9           | 2,250242994  | 2,324919719  | -0,07467672 |  |
| 204187_at    | GMPR            | 5,009671729  | 5,084439818  | -0,07476809 |  |
| 211590_x_at  | TBXA2R          | 0,457392764  | 0,532164371  | -0,07477161 |  |
| 226571_s_at  | PTPRS           | 2,589836943  | 2,664608955  | -0,07477201 |  |
| 266_s_at     | CD24            | -1,104953586 | -1,030159381 | -0,0747942  |  |
| 39891_at     | ZNF710          | 1,247462054  | 1,322322498  | -0,07486044 |  |
| 231895_at    | SASS6           | 1,923647937  | 1,998633167  | -0,07498523 |  |
| 1552544_at   | SERPINA12       | -1,937711681 | -1,862647763 | -0,07506392 |  |
| 1554232_a_at | -               | -1,937711681 | -1,862647763 | -0,07506392 |  |
| 1558343_at   | -               | -1,937711681 | -1,862647763 | -0,07506392 |  |
| 1562524_at   | -               | -1,937711681 | -1,862647763 | -0,07506392 |  |
| 1566672_at   | -               | -1,937711681 | -1,862647763 | -0,07506392 |  |
| 1566938_at   | -               | -1,937711681 | -1,862647763 | -0,07506392 |  |
| 1570259_at   | LIMS1           | -1,937711681 | -1,862647763 | -0,07506392 |  |
| 217008_s_at  | GRM7            | -1,937711681 | -1,862647763 | -0,07506392 |  |
| 219064_at    | ITIH5           | -1,937711681 | -1,862647763 | -0,07506392 |  |
| 221225_at    | DCAKD           | -1,937711681 | -1,862647763 | -0,07506392 |  |
| 223372_at    | NUDT22          | -1,937711681 | -1,862647763 | -0,07506392 |  |
| 229346_at    | NES             | -1,937711681 | -1,862647763 | -0,07506392 |  |
| 229928_at    | LOC100507265    | -1,937711681 | -1,862647763 | -0,07506392 |  |
| 231446_at    | LOC100506226    | -1,937711681 | -1,862647763 | -0,07506392 |  |
| 233624_at    | -               | -1,937711681 | -1,862647763 | -0,07506392 |  |
| 234172_at    | -               | -1,937711681 | -1,862647763 | -0,07506392 |  |
| 234262_at    | -               | -1,937711681 | -1,862647763 | -0,07506392 |  |
| 234748_x_at  | KIF20B          | -1,937711681 | -1,862647763 | -0,07506392 |  |
| 234879_at    | -               | -1,937711681 | -1,862647763 | -0,07506392 |  |
| 237365_at    | ELOVL2-AS1      | -1,937711681 | -1,862647763 | -0,07506392 |  |
| 244282_at    | -               | -1,937711681 | -1,862647763 | -0,07506392 |  |
| 208415_x_at  | ING1            | 3,32230241   | 3,39737216   | -0,07506975 |  |
| 228697_at    | HINT3           | 3,682769893  | 3,757867094  | -0,0750972  |  |
| 203800_s_at  | MRPS14          | 3,931919671  | 4,007018329  | -0,07509866 |  |
| 209833_at    | CRADD           | 1,274448124  | 1,349621332  | -0,07517321 |  |
| 200789_at    | ECH1            | 4,519052534  | 4,594226933  | -0,0751744  |  |
| 219267_at    | GLTP            | 1,394109935  | 1,469325098  | -0,07521516 |  |
| 203568_s_at  | TRIM38          | 1,504602299  | 1,579853228  | -0,07525093 |  |
| 217370_x_at  | FUS             | 3,837056482  | 3,912315453  | -0,07525897 |  |
| 39650_s_at   | PCNXL2          | -2,311268652 | -2,235961545 | -0,07530711 |  |
| 204494_s_at  | C15orf39        | 1,917954284  | 1,993317152  | -0,07536287 |  |
| 202532_s_at  | DHFR            | 2,630440446  | 2,705818724  | -0,07537828 |  |
| 228336_at    | PWWP2A          | 2,173470163  | 2,248887791  | -0,07541763 |  |
| 1554661_s_at | CNST            | 1,139070151  | 1,214517879  | -0,07544773 |  |
| 201664_at    | SMC4            | 5,036522446  | 5,111986744  | -0,0754643  |  |
| 35265_at     | FXR2            | 2,221640933  | 2,297144887  | -0,07550395 |  |
| 230407_at    | SBNO1           | 3,030704581  | 3,106248809  | -0,07554423 |  |
| 212971_at    | CARS            | 4,868844325  | 4,944427124  | -0,0755828  |  |
| 222466_s_at  | MRPL42          | 4,633344063  | 4,708935     | -0,07559094 |  |
| 209046_s_at  | GABARAPL2       | 4,926516078  | 5,002138926  | -0,07562285 |  |

|              |                 |              |              |             |  |
|--------------|-----------------|--------------|--------------|-------------|--|
| 231809_x_at  | PDCD7           | 2,972842302  | 3,048471686  | -0,07562938 |  |
| 225918_at    | GLG1            | 1,496984567  | 1,572742379  | -0,07575781 |  |
| 201902_s_at  | YY1             | 0,911589958  | 0,987376598  | -0,07578664 |  |
| 226211_at    | MEG3            | 0,911589958  | 0,987376598  | -0,07578664 |  |
| 1557813_at   | -               | 0,648296226  | 0,724100169  | -0,07580394 |  |
| 207608_x_at  | CYP1A2          | 0,44160593   | 0,51742585   | -0,07581992 |  |
| 226267_at    | JDP2            | 0,44160593   | 0,51742585   | -0,07581992 |  |
| 231045_x_at  | C11orf31        | 4,763255815  | 4,839094308  | -0,07583849 |  |
| 225141_at    | NFATC3          | 3,310399576  | 3,386261038  | -0,07586146 |  |
| 211662_s_at  | VDAC2           | 6,404901029  | 6,480768515  | -0,07586749 |  |
| 206416_at    | ZNF205          | -1,026571149 | -0,950686014 | -0,07588513 |  |
| 209737_at    | MAGI2           | -1,026571149 | -0,950686014 | -0,07588513 |  |
| 211349_at    | SLC15A1         | -1,026571149 | -0,950686014 | -0,07588513 |  |
| 218792_s_at  | BSPRY           | -1,026571149 | -0,950686014 | -0,07588513 |  |
| 234470_at    | -               | -1,026571149 | -0,950686014 | -0,07588513 |  |
| 234716_at    | ZIC1            | -1,026571149 | -0,950686014 | -0,07588513 |  |
| 235769_at    | ZNF497          | -1,026571149 | -0,950686014 | -0,07588513 |  |
| 238125_at    | ADAMTS16        | -1,026571149 | -0,950686014 | -0,07588513 |  |
| 239725_at    | PGAP1           | -1,026571149 | -0,950686014 | -0,07588513 |  |
| 244479_at    | -               | -1,026571149 | -0,950686014 | -0,07588513 |  |
| 225819_at    | TBRG1           | 2,232003119  | 2,307890888  | -0,07588777 |  |
| 221045_s_at  | PER3            | 1,783520648  | 1,859476797  | -0,07595615 |  |
| 210854_x_at  | SLC6A8          | 3,148435161  | 3,22439681   | -0,07596165 |  |
| 32402_s_at   | SYMPK           | 1,261018186  | 1,337086025  | -0,07606784 |  |
| 205748_s_at  | RNF126          | 2,022468633  | 2,098562556  | -0,07609392 |  |
| 232899_at    | RPL23AP7 /// RP | 2,022468633  | 2,098562556  | -0,07609392 |  |
| 212407_at    | METTL13         | 3,667581479  | 3,743690278  | -0,0761088  |  |
| 203818_s_at  | SF3A3           | 3,321224383  | 3,39737216   | -0,07614778 |  |
| 225648_at    | STK35           | 1,823660386  | 1,899812471  | -0,07615208 |  |
| 218253_s_at  | EIF2D           | 3,25953187   | 3,335699198  | -0,07616733 |  |
| 226202_at    | ZNF398          | 2,259277178  | 2,335461563  | -0,07618439 |  |
| 1552660_a_at | C5orf22         | 1,689737652  | 1,765933685  | -0,07619603 |  |
| 200745_s_at  | GNB1            | 3,854300588  | 3,930508802  | -0,07620821 |  |
| 1558028_x_at | LOC647979       | 3,529719415  | 3,605931378  | -0,07621196 |  |
| 220161_s_at  | EPB41L4B        | 1,64218396   | 1,718396606  | -0,07621265 |  |
| 41047_at     | C9orf16         | 2,973528631  | 3,049752631  | -0,076224   |  |
| 212055_at    | TPGS2           | 2,90394695   | 2,980244813  | -0,07629786 |  |
| 1554148_a_at | SLC33A1         | 1,903621061  | 1,979940779  | -0,07631972 |  |
| 39729_at     | PRDX2           | -2,113928714 | -2,037551727 | -0,07637699 |  |
| 204924_at    | TLR2            | 0,317354302  | 0,393761504  | -0,0764072  |  |
| 213393_at    | MFSD9           | 0,317354302  | 0,393761504  | -0,0764072  |  |
| 238095_at    | GATA5           | 0,317354302  | 0,393761504  | -0,0764072  |  |
| 206562_s_at  | CSNK1A1         | 4,19991587   | 4,276328567  | -0,0764127  |  |
| 203415_at    | PDCD6           | 4,536342985  | 4,612762285  | -0,0764193  |  |
| 212643_at    | MAPK1IP1L       | 6,468299606  | 6,544740007  | -0,0764404  |  |
| 225528_at    | IPO8            | 2,31665944   | 2,39311332   | -0,07645388 |  |
| 214006_s_at  | GGCX            | 1,05337236   | 1,129843209  | -0,07647085 |  |
| 225798_at    | JAZF1           | 1,05337236   | 1,129843209  | -0,07647085 |  |
| 1553181_at   | DDX31           | -0,467091869 | -0,39061235  | -0,07647952 |  |
| 1568616_a_at | -               | -0,467091869 | -0,39061235  | -0,07647952 |  |
| 202037_s_at  | SFRP1           | -0,467091869 | -0,39061235  | -0,07647952 |  |
| 207482_at    | TP53TG5         | -0,467091869 | -0,39061235  | -0,07647952 |  |
| 209769_s_at  | SEPT5-GP1BB     | -0,467091869 | -0,39061235  | -0,07647952 |  |
| 216571_at    | -               | -0,467091869 | -0,39061235  | -0,07647952 |  |
| 221336_at    | ATOH1           | -0,467091869 | -0,39061235  | -0,07647952 |  |
| 234680_at    | KRTAP17-1       | -0,467091869 | -0,39061235  | -0,07647952 |  |

|              |                |              |              |             |  |
|--------------|----------------|--------------|--------------|-------------|--|
| 202567_at    | SNRPD3         | 6,353164978  | 6,429658069  | -0,07649309 |  |
| 202417_at    | KEAP1          | 5,940313411  | 6,016823507  | -0,0765101  |  |
| 218997_at    | POLR1E         | 2,458724341  | 2,53523821   | -0,07651387 |  |
| 205164_at    | GCAT           | 1,485482016  | 1,562009954  | -0,07652794 |  |
| 1570483_at   | -              | 0,052199481  | 0,128747141  | -0,07654766 |  |
| 207999_s_at  | ADARB1         | 0,052199481  | 0,128747141  | -0,07654766 |  |
| 219498_s_at  | BCL11A         | 0,052199481  | 0,128747141  | -0,07654766 |  |
| 235533_at    | COX19          | 0,052199481  | 0,128747141  | -0,07654766 |  |
| 212815_at    | ASCC3          | 3,359534664  | 3,436090594  | -0,07655593 |  |
| 214355_x_at  | CTAGE15P /// C | 1,373456798  | 1,450051551  | -0,07659475 |  |
| 212519_at    | UBE2E1         | 5,426400135  | 5,503006186  | -0,07660605 |  |
| 201275_at    | FDPS           | 5,073485277  | 5,150107687  | -0,07662241 |  |
| 226574_at    | PSPC1          | 3,827217859  | 3,903840511  | -0,07662265 |  |
| 38487_at     | STAB1          | 0,372515175  | 0,449173253  | -0,07665808 |  |
| 204947_at    | E2F1           | 2,220484971  | 2,297144887  | -0,07665992 |  |
| 224606_at    | KLF6           | 2,220484971  | 2,297144887  | -0,07665992 |  |
| 208141_s_at  | DOHH           | 0,728550685  | 0,805216064  | -0,07666538 |  |
| 219595_at    | LOC100287515 / | 2,482063962  | 2,558821855  | -0,07675789 |  |
| 225136_at    | PLEKHA2        | 3,413135307  | 3,489929688  | -0,07679438 |  |
| 212099_at    | RHOB           | 4,029534322  | 4,106388091  | -0,07685377 |  |
| 227530_at    | AKAP12         | 1,85379461   | 1,930732138  | -0,07693753 |  |
| 213932_x_at  | HLA-A          | 5,879178236  | 5,956125984  | -0,07694775 |  |
| 223386_at    | FAM118B        | 2,678376417  | 2,755336312  | -0,07695989 |  |
| 242851_at    | KIAA1919       | 1,530951994  | 1,60795124   | -0,07699925 |  |
| 213052_at    | PRKAR2A        | 3,307136232  | 3,384231608  | -0,07709538 |  |
| 220336_s_at  | GP6            | 1,422536444  | 1,499637023  | -0,07710058 |  |
| 206580_s_at  | EFEMP2         | 1,114389003  | 1,191491281  | -0,07710228 |  |
| 213979_s_at  | CTBP1          | 1,114389003  | 1,191491281  | -0,07710228 |  |
| 224631_at    | ZFP91          | 1,114389003  | 1,191491281  | -0,07710228 |  |
| 226126_at    | TBCK           | 2,721505869  | 2,798646381  | -0,07714051 |  |
| 226153_s_at  | CNOT6L         | 3,260656977  | 3,337798009  | -0,07714103 |  |
| 201307_at    | 40787          | 4,095965104  | 4,173144843  | -0,07717974 |  |
| 217733_s_at  | TMSB10         | 6,294226095  | 6,371429286  | -0,07720319 |  |
| 238123_at    | GABRQ          | 1,764611101  | 1,841838775  | -0,07722767 |  |
| 1553295_at   | ABCA13         | -3,114791413 | -3,037500868 | -0,07729054 |  |
| 1553433_at   | CCDC171        | -3,114791413 | -3,037500868 | -0,07729054 |  |
| 1555365_x_at | C11orf58       | -3,114791413 | -3,037500868 | -0,07729054 |  |
| 1556351_at   | HCN1           | -3,114791413 | -3,037500868 | -0,07729054 |  |
| 1560380_at   | LOC497256      | -3,114791413 | -3,037500868 | -0,07729054 |  |
| 1561076_at   | -              | -3,114791413 | -3,037500868 | -0,07729054 |  |
| 1561731_at   | -              | -3,114791413 | -3,037500868 | -0,07729054 |  |
| 1562276_at   | -              | -3,114791413 | -3,037500868 | -0,07729054 |  |
| 1563187_at   | -              | -3,114791413 | -3,037500868 | -0,07729054 |  |
| 1563787_a_at | CAGE1          | -3,114791413 | -3,037500868 | -0,07729054 |  |
| 1563904_at   | LOC100129620   | -3,114791413 | -3,037500868 | -0,07729054 |  |
| 1564466_at   | FLJ37644       | -3,114791413 | -3,037500868 | -0,07729054 |  |
| 1567386_at   | -              | -3,114791413 | -3,037500868 | -0,07729054 |  |
| 204236_at    | FLI1           | -3,114791413 | -3,037500868 | -0,07729054 |  |
| 209960_at    | HGF            | -3,114791413 | -3,037500868 | -0,07729054 |  |
| 215309_at    | ZNF674         | -3,114791413 | -3,037500868 | -0,07729054 |  |
| 215704_at    | FLG            | -3,114791413 | -3,037500868 | -0,07729054 |  |
| 216625_at    | -              | -3,114791413 | -3,037500868 | -0,07729054 |  |
| 220754_at    | ARMC9          | -3,114791413 | -3,037500868 | -0,07729054 |  |
| 232752_at    | LOXL1-AS1      | -3,114791413 | -3,037500868 | -0,07729054 |  |
| 233012_at    | -              | -3,114791413 | -3,037500868 | -0,07729054 |  |
| 233616_at    | -              | -3,114791413 | -3,037500868 | -0,07729054 |  |



|             |                  |              |              |             |  |
|-------------|------------------|--------------|--------------|-------------|--|
| 234169_at   | -                | -3,114791413 | -3,037500868 | -0,07729054 |  |
| 241030_at   | -                | -3,114791413 | -3,037500868 | -0,07729054 |  |
| 241068_at   | -                | -3,114791413 | -3,037500868 | -0,07729054 |  |
| 209166_s_at | MAN2B1           | 2,64946283   | 2,726791458  | -0,07732863 |  |
| 225169_at   | INTS4            | 2,64946283   | 2,726791458  | -0,07732863 |  |
| 218132_s_at | TSEN34           | 4,040056475  | 4,117425547  | -0,07736907 |  |
| 212458_at   | SPRED2           | 2,390468117  | 2,467842989  | -0,07737487 |  |
| 203994_s_at | C21orf2          | 1,62481334   | 1,702196344  | -0,077383   |  |
| 1566177_at  | -                | 0,417596971  | 0,495031851  | -0,07743488 |  |
| 203617_x_at | ELK1             | 4,064098984  | 4,141655035  | -0,07755605 |  |
| 228568_at   | GCOM1 /// MYZA   | 1,238353345  | 1,315948728  | -0,07759538 |  |
| 229692_at   | -                | 0,962260738  | 1,039887232  | -0,07762649 |  |
| 218721_s_at | C1orf27          | 2,2992452    | 2,376875125  | -0,07762992 |  |
| 222590_s_at | NLK              | 1,758252436  | 1,835911187  | -0,07765875 |  |
| 223439_at   | NKAP             | 1,758252436  | 1,835911187  | -0,07765875 |  |
| 203656_at   | FIG4             | 2,922548342  | 3,000258961  | -0,07771062 |  |
| 214102_at   | -                | 0,882651021  | 0,960386719  | -0,0777357  |  |
| 219565_at   | CYP20A1          | 0,882651021  | 0,960386719  | -0,0777357  |  |
| 200875_s_at | MIR1292 /// NOP  | 6,480784491  | 6,558528746  | -0,07774425 |  |
| 1556308_at  | PRRT3            | 0,171847695  | 0,249604176  | -0,07775648 |  |
| 1561019_at  | -                | 0,171847695  | 0,249604176  | -0,07775648 |  |
| 218223_s_at | PLEKHO1          | 0,171847695  | 0,249604176  | -0,07775648 |  |
| 233116_at   | -                | 0,171847695  | 0,249604176  | -0,07775648 |  |
| 242327_x_at | -                | 0,171847695  | 0,249604176  | -0,07775648 |  |
| 225448_at   | NAPG             | 2,466546243  | 2,544354523  | -0,07780828 |  |
| 218094_s_at | DBNDD2 /// SYS   | 1,46610492   | 1,543943227  | -0,07783831 |  |
| 218590_at   | C10orf2          | 3,451082821  | 3,529030171  | -0,07794735 |  |
| 221472_at   | SERINC3          | 4,022255566  | 4,100219485  | -0,07796392 |  |
| 1556149_at  | ARVCF            | 0,03125738   | 0,109221392  | -0,07796401 |  |
| 231132_at   | -                | 0,03125738   | 0,109221392  | -0,07796401 |  |
| 238617_at   | KIF26B           | 0,03125738   | 0,109221392  | -0,07796401 |  |
| 211531_x_at | PRB1             | 1,168140757  | 1,246149888  | -0,07800913 |  |
| 218544_s_at | RCL1             | 2,993291442  | 3,071356473  | -0,07806503 |  |
| 212222_at   | PSME4            | 2,589836943  | 2,667949403  | -0,07811246 |  |
| 233341_s_at | POLR1B           | 2,589836943  | 2,667949403  | -0,07811246 |  |
| 201913_s_at | COASY            | 2,954882186  | 3,033010968  | -0,07812878 |  |
| 200842_s_at | EPRS             | 3,706908684  | 3,785040604  | -0,07813192 |  |
| 217783_s_at | YPEL5            | 3,149650293  | 3,227795991  | -0,0781457  |  |
| 206272_at   | RAB4A /// SPHAF  | 1,954567604  | 2,032717854  | -0,07815025 |  |
| 207621_s_at | PEMT             | 1,954567604  | 2,032717854  | -0,07815025 |  |
| 225701_at   | AKNA             | 0,613492853  | 0,691645685  | -0,07815283 |  |
| 219200_at   | FASTKD3          | 3,815015946  | 3,893176339  | -0,07816039 |  |
| 202841_x_at | OGFR             | 2,320980353  | 2,39915583   | -0,07817548 |  |
| 209858_x_at | MPPE1            | 1,027166904  | 1,105412836  | -0,07824593 |  |
| 231713_s_at | ELP2             | 3,25953187   | 3,337798009  | -0,07826614 |  |
| 231530_s_at | C11orf1          | 2,635653293  | 2,713921281  | -0,07826799 |  |
| 206868_at   | STARD8           | 3,006764929  | 3,08516499   | -0,07840006 |  |
| 1557539_at  | -                | -0,496991414 | -0,41858459  | -0,07840682 |  |
| 1566957_at  | -                | -0,496991414 | -0,41858459  | -0,07840682 |  |
| 203673_at   | TG               | -0,496991414 | -0,41858459  | -0,07840682 |  |
| 204666_s_at | SIKE1            | -0,496991414 | -0,41858459  | -0,07840682 |  |
| 208506_at   | HIST1H3A /// HIS | -0,496991414 | -0,41858459  | -0,07840682 |  |
| 214082_at   | CA5B             | -0,496991414 | -0,41858459  | -0,07840682 |  |
| 214192_at   | NUP88            | -0,496991414 | -0,41858459  | -0,07840682 |  |
| 216023_at   | KDM4B            | -0,496991414 | -0,41858459  | -0,07840682 |  |
| 216614_at   | -                | -0,496991414 | -0,41858459  | -0,07840682 |  |

|              |           |              |              |             |  |
|--------------|-----------|--------------|--------------|-------------|--|
| 217357_at    | -         | -0,496991414 | -0,41858459  | -0,07840682 |  |
| 223604_at    | GARNL3    | -0,496991414 | -0,41858459  | -0,07840682 |  |
| 231659_at    | ST3GAL3   | -0,496991414 | -0,41858459  | -0,07840682 |  |
| 233214_at    | -         | -0,496991414 | -0,41858459  | -0,07840682 |  |
| 237510_at    | MYNN      | -0,496991414 | -0,41858459  | -0,07840682 |  |
| 1559326_at   | DIO3OS    | -0,299034815 | -0,220592223 | -0,07844259 |  |
| 1563407_x_at | ATP4B     | -0,299034815 | -0,220592223 | -0,07844259 |  |
| 206046_at    | ADAM23    | -0,299034815 | -0,220592223 | -0,07844259 |  |
| 211125_x_at  | GRIN1     | -0,299034815 | -0,220592223 | -0,07844259 |  |
| 231660_at    | -         | -0,299034815 | -0,220592223 | -0,07844259 |  |
| 239060_at    | -         | -0,299034815 | -0,220592223 | -0,07844259 |  |
| 243917_at    | CLIC5     | -0,299034815 | -0,220592223 | -0,07844259 |  |
| 222522_x_at  | MRPS10    | 3,225364068  | 3,303845028  | -0,07848096 |  |
| 201207_at    | TNFAIP1   | 1,655931423  | 1,73441697   | -0,07848555 |  |
| 203785_s_at  | DDX28     | 1,224581536  | 1,303116084  | -0,07853455 |  |
| 1556355_x_at | RGL3      | 0,401366113  | 0,479907041  | -0,07854093 |  |
| 214373_at    | -         | 0,401366113  | 0,479907041  | -0,07854093 |  |
| 213860_x_at  | CSNK1A1   | 5,755340753  | 5,833941167  | -0,07860041 |  |
| 221999_at    | VRK3      | 2,630440446  | 2,709065209  | -0,07862476 |  |
| 1556832_at   | -         | -3,07502285  | -2,996335703 | -0,07868715 |  |
| 1557328_at   | LOC283665 | -3,07502285  | -2,996335703 | -0,07868715 |  |
| 1559652_at   | -         | -3,07502285  | -2,996335703 | -0,07868715 |  |
| 1561663_at   | -         | -3,07502285  | -2,996335703 | -0,07868715 |  |
| 1563087_at   | -         | -3,07502285  | -2,996335703 | -0,07868715 |  |
| 1566970_at   | -         | -3,07502285  | -2,996335703 | -0,07868715 |  |
| 1568919_at   | -         | -3,07502285  | -2,996335703 | -0,07868715 |  |
| 1569124_at   | LRRC63    | -3,07502285  | -2,996335703 | -0,07868715 |  |
| 1570395_a_at | FAM66C    | -3,07502285  | -2,996335703 | -0,07868715 |  |
| 207674_at    | FCAR      | -3,07502285  | -2,996335703 | -0,07868715 |  |
| 213663_s_at  | -         | -3,07502285  | -2,996335703 | -0,07868715 |  |
| 214868_at    | PIWIL1    | -3,07502285  | -2,996335703 | -0,07868715 |  |
| 230865_at    | LIX1      | -3,07502285  | -2,996335703 | -0,07868715 |  |
| 234581_at    | -         | -3,07502285  | -2,996335703 | -0,07868715 |  |
| 236705_at    | TMEM196   | -3,07502285  | -2,996335703 | -0,07868715 |  |
| 237302_at    | -         | -3,07502285  | -2,996335703 | -0,07868715 |  |
| 237615_at    | -         | -3,07502285  | -2,996335703 | -0,07868715 |  |
| 238382_x_at  | -         | -3,07502285  | -2,996335703 | -0,07868715 |  |
| 239116_at    | ANKRD10   | -3,07502285  | -2,996335703 | -0,07868715 |  |
| 240768_x_at  | -         | -3,07502285  | -2,996335703 | -0,07868715 |  |
| 241479_at    | -         | -3,07502285  | -2,996335703 | -0,07868715 |  |
| 241770_x_at  | -         | -3,07502285  | -2,996335703 | -0,07868715 |  |
| 243559_at    | -         | -3,07502285  | -2,996335703 | -0,07868715 |  |
| 243996_at    | -         | -3,07502285  | -2,996335703 | -0,07868715 |  |
| 203410_at    | AP3M2     | 3,479385765  | 3,558125564  | -0,0787398  |  |
| 202475_at    | TMEM147   | 6,781465835  | 6,860208348  | -0,07874251 |  |
| 223229_at    | UBE2T     | 4,275330031  | 4,354078399  | -0,07874837 |  |
| 1561348_at   | LOC339874 | -1,089016378 | -1,010192375 | -0,078824   |  |
| 206212_at    | CPA2      | -1,089016378 | -1,010192375 | -0,078824   |  |
| 206608_s_at  | RPGRIP1   | -1,089016378 | -1,010192375 | -0,078824   |  |
| 210333_at    | NR5A1     | -1,089016378 | -1,010192375 | -0,078824   |  |
| 211838_x_at  | PCDHA5    | -1,089016378 | -1,010192375 | -0,078824   |  |
| 217137_x_at  | -         | -1,089016378 | -1,010192375 | -0,078824   |  |
| 220424_at    | NPHS2     | -1,089016378 | -1,010192375 | -0,078824   |  |
| 230467_at    | TMEM52    | -1,089016378 | -1,010192375 | -0,078824   |  |
| 234198_at    | KCNIP3    | -1,089016378 | -1,010192375 | -0,078824   |  |
| 237352_at    | -         | -1,089016378 | -1,010192375 | -0,078824   |  |

|              |                |              |              |             |  |
|--------------|----------------|--------------|--------------|-------------|--|
| 239005_at    | -              | -1,089016378 | -1,010192375 | -0,078824   |  |
| 239447_at    | TRA2B          | -1,089016378 | -1,010192375 | -0,078824   |  |
| 241905_at    | PIK3C2A        | -1,089016378 | -1,010192375 | -0,078824   |  |
| 244158_at    | -              | -1,089016378 | -1,010192375 | -0,078824   |  |
| 210151_s_at  | DYRK3          | 2,122398022  | 2,201267805  | -0,07886978 |  |
| 227246_at    | PLRG1          | 1,865674241  | 1,944570415  | -0,07889617 |  |
| 230129_at    | PSTK           | 3,052955227  | 3,131875186  | -0,07891996 |  |
| 202025_x_at  | ACAA1          | 1,649074067  | 1,728030156  | -0,07895609 |  |
| 204011_at    | SPRY2          | 3,76038475   | 3,839380885  | -0,07899614 |  |
| 211168_s_at  | UPF1           | 2,842156496  | 2,921282473  | -0,07912598 |  |
| 225650_at    | SAMD1          | 1,820612054  | 1,899812471  | -0,07920042 |  |
| 218927_s_at  | CHST12         | 2,333865983  | 2,413157372  | -0,07929139 |  |
| 204143_s_at  | ENOSF1         | 1,390002893  | 1,469325098  | -0,0793222  |  |
| 213633_at    | SH3BP1         | 1,390002893  | 1,469325098  | -0,0793222  |  |
| 226826_at    | LSM11          | 1,390002893  | 1,469325098  | -0,0793222  |  |
| 203326_x_at  | -              | 0,273439642  | 0,352836757  | -0,07939712 |  |
| 213784_at    | IFT27          | 0,273439642  | 0,352836757  | -0,07939712 |  |
| 214390_s_at  | BCAT1          | 0,273439642  | 0,352836757  | -0,07939712 |  |
| 229933_at    | C1orf74        | 0,273439642  | 0,352836757  | -0,07939712 |  |
| 242120_at    | -              | 0,273439642  | 0,352836757  | -0,07939712 |  |
| 224668_at    | SYS1           | 1,732533761  | 1,811954245  | -0,07942048 |  |
| 208846_s_at  | VDAC3          | 5,34599736   | 5,425442281  | -0,07944492 |  |
| 212901_s_at  | CSTF2T         | 2,146943689  | 2,226407528  | -0,07946384 |  |
| 228795_at    | PRKCB          | 1,331241794  | 1,410714371  | -0,07947258 |  |
| 205087_at    | RWDD3          | 2,35929703   | 2,438805127  | -0,0795081  |  |
| 224714_at    | MKI67IP        | 5,263936937  | 5,34347017   | -0,07953323 |  |
| 203300_x_at  | AP1S2          | 6,105338997  | 6,184877475  | -0,07953848 |  |
| 226562_at    | ZSCAN29        | 0,934330293  | 1,013870809  | -0,07954052 |  |
| 232959_at    | -              | 0,934330293  | 1,013870809  | -0,07954052 |  |
| 218053_at    | PRPF40A        | 5,128753587  | 5,208335094  | -0,07958151 |  |
| 204021_s_at  | PURA           | 1,493160564  | 1,572742379  | -0,07958181 |  |
| 202698_x_at  | COX4I1         | 6,481508446  | 6,561113562  | -0,07960512 |  |
| 228060_at    | SLC35F1        | 0,592200562  | 0,67181667   | -0,07961611 |  |
| 220058_at    | C17orf39       | 1,269985355  | 1,349621332  | -0,07963598 |  |
| 201020_at    | YWHAH          | 4,13575284   | 4,215422121  | -0,07966928 |  |
| 200825_s_at  | HYOU1          | 3,854300588  | 3,933981372  | -0,07968078 |  |
| 1555896_a_at | ADAM15         | 1,932146506  | 2,011838132  | -0,07969163 |  |
| 200665_s_at  | LOC100505813 / | 0,853119696  | 0,932882274  | -0,07976258 |  |
| 228888_at    | STAC2          | 0,853119696  | 0,932882274  | -0,07976258 |  |
| 229608_at    | FAM212B        | 0,853119696  | 0,932882274  | -0,07976258 |  |
| 1566854_at   | -              | -0,759588698 | -0,679763839 | -0,07982486 |  |
| 216024_at    | DNM2           | -0,759588698 | -0,679763839 | -0,07982486 |  |
| 216676_x_at  | KIR3DL3        | -0,759588698 | -0,679763839 | -0,07982486 |  |
| 217291_at    | CEACAM5        | -0,759588698 | -0,679763839 | -0,07982486 |  |
| 224244_s_at  | APOA5          | -0,759588698 | -0,679763839 | -0,07982486 |  |
| 227976_at    | CXorf69        | -0,759588698 | -0,679763839 | -0,07982486 |  |
| 235539_at    | NUMA1          | -0,759588698 | -0,679763839 | -0,07982486 |  |
| 237786_at    | MAGI2          | -0,759588698 | -0,679763839 | -0,07982486 |  |
| 240737_at    | -              | -0,759588698 | -0,679763839 | -0,07982486 |  |
| 220560_at    | C11orf21       | 2,074578432  | 2,154405725  | -0,07982729 |  |
| 210446_at    | GATA1          | 3,920575295  | 4,00040886   | -0,07983357 |  |
| 205218_at    | POLR3F         | 2,726400382  | 2,806245339  | -0,07984496 |  |
| 223297_at    | AMMECR1L       | 3,354274239  | 3,434130109  | -0,07985587 |  |
| 229426_at    | COX5A          | 2,173470163  | 2,253342112  | -0,07987195 |  |
| 222398_s_at  | EFTUD2         | 4,918518904  | 4,998495147  | -0,07997624 |  |
| 1556054_at   | -              | 0,767063567  | 0,847075464  | -0,0800119  |  |

|              |               |              |              |             |  |
|--------------|---------------|--------------|--------------|-------------|--|
| 241388_at    | -             | 0,767063567  | 0,847075464  | -0,0800119  |  |
| 223217_s_at  | NFKBIZ        | 1,000476627  | 1,080561626  | -0,080085   |  |
| 218285_s_at  | BDH2          | 2,787001691  | 2,867091644  | -0,08008995 |  |
| 226300_at    | MED19         | 3,32230241   | 3,402394519  | -0,08009211 |  |
| 203063_at    | PPM1F         | 1,201332287  | 1,281471383  | -0,0801391  |  |
| 204241_at    | ACOX3         | 1,201332287  | 1,281471383  | -0,0801391  |  |
| 214273_x_at  | NPRL3         | 1,201332287  | 1,281471383  | -0,0801391  |  |
| 1569905_at   | HSD11B1L      | -0,00073712  | 0,079428135  | -0,08016526 |  |
| 222625_s_at  | NDE1          | -0,00073712  | 0,079428135  | -0,08016526 |  |
| 232613_at    | PBRM1         | -0,00073712  | 0,079428135  | -0,08016526 |  |
| 222052_at    | C19orf54      | 2,458724341  | 2,538891651  | -0,08016731 |  |
| 218539_at    | FBXO34        | 4,397481203  | 4,477716877  | -0,08023567 |  |
| 220653_at    | ZIM2          | 0,376672223  | 0,456918297  | -0,08024607 |  |
| 229869_at    | -             | 0,376672223  | 0,456918297  | -0,08024607 |  |
| 234316_x_at  | KLK12         | 0,376672223  | 0,456918297  | -0,08024607 |  |
| 227515_at    | STAMPB        | 0,67554678   | 0,755840599  | -0,08029382 |  |
| 202491_s_at  | IKBKAP        | 3,959896375  | 4,040263518  | -0,08036714 |  |
| 233064_at    | ZFR2          | 3,604290432  | 3,684723168  | -0,08043274 |  |
| 201551_s_at  | LAMP1         | 2,227406889  | 2,307890888  | -0,080484   |  |
| 208405_s_at  | CD164         | 5,671960066  | 5,752503931  | -0,08054386 |  |
| 209883_at    | GLT25D2       | 1,578645857  | 1,659204017  | -0,08055816 |  |
| 203328_x_at  | IDE           | 2,737756747  | 2,81832103   | -0,08056428 |  |
| 228156_at    | -             | 1,426552034  | 1,507116528  | -0,08056449 |  |
| 227391_x_at  | LRRFIP1       | 3,780134221  | 3,860702537  | -0,08056832 |  |
| 211804_s_at  | CDK2          | 2,371846398  | 2,452428893  | -0,0805825  |  |
| 241792_x_at  | LUC7L3        | 0,841135803  | 0,921731975  | -0,08059617 |  |
| 238041_at    | TCF12         | 0,57782909   | 0,658444279  | -0,08061519 |  |
| 225182_at    | TMEM50B       | 4,010265089  | 4,090916839  | -0,08065175 |  |
| 1556021_at   | GPR180        | -1,131062212 | -1,050406615 | -0,0806556  |  |
| 1569153_at   | -             | -1,131062212 | -1,050406615 | -0,0806556  |  |
| 1570221_at   | -             | -1,131062212 | -1,050406615 | -0,0806556  |  |
| 205015_s_at  | TGFA          | -1,131062212 | -1,050406615 | -0,0806556  |  |
| 215263_at    | ZXDA /// ZXDB | -1,131062212 | -1,050406615 | -0,0806556  |  |
| 220542_s_at  | BPIFA1        | -1,131062212 | -1,050406615 | -0,0806556  |  |
| 228044_at    | SERP2         | -1,131062212 | -1,050406615 | -0,0806556  |  |
| 228808_s_at  | LOXL2         | -1,131062212 | -1,050406615 | -0,0806556  |  |
| 230198_at    | -             | -1,131062212 | -1,050406615 | -0,0806556  |  |
| 230209_at    | ZXDC          | -1,131062212 | -1,050406615 | -0,0806556  |  |
| 235017_s_at  | CSRNP3        | -1,131062212 | -1,050406615 | -0,0806556  |  |
| 229181_s_at  | HAUS2         | 3,425226911  | 3,505883949  | -0,08065704 |  |
| 235433_at    | APOOL         | 1,917954284  | 1,998633167  | -0,08067888 |  |
| 231896_s_at  | DENR          | 5,359712864  | 5,440413544  | -0,08070068 |  |
| 212025_s_at  | FLII          | 1,990274687  | 2,071071048  | -0,08079636 |  |
| 224983_at    | SCARB2        | 2,666540916  | 2,747463672  | -0,08092276 |  |
| 205224_at    | SURF2         | 1,473887017  | 1,55481039   | -0,08092337 |  |
| 212919_at    | DCP2          | 4,511983428  | 4,592909513  | -0,08092609 |  |
| 225554_s_at  | ANAPC7        | 3,48613512   | 3,56709884   | -0,08096372 |  |
| 209712_at    | SLC35D1       | 1,912238072  | 1,993317152  | -0,08107908 |  |
| 222018_at    | NACA          | 1,912238072  | 1,993317152  | -0,08107908 |  |
| 208277_at    | PITX3         | 0,123193849  | 0,204310755  | -0,08111691 |  |
| 214496_x_at  | KAT6B         | 0,123193849  | 0,204310755  | -0,08111691 |  |
| 228446_at    | KIAA2026      | 0,123193849  | 0,204310755  | -0,08111691 |  |
| 219770_at    | GTDC1         | 2,089851283  | 2,170981159  | -0,08112988 |  |
| 234863_x_at  | FBXO5         | 3,91129185   | 3,992437318  | -0,08114547 |  |
| 1569069_s_at | TDRD3         | 0,984222186  | 1,065442793  | -0,08122061 |  |
| 202169_s_at  | AASDHPPT      | 5,124433928  | 5,205751817  | -0,08131789 |  |

|              |                 |              |              |             |  |
|--------------|-----------------|--------------|--------------|-------------|--|
| 208132_x_at  | PRRC2A          | 2,59162628   | 2,672945617  | -0,08131934 |  |
| 229175_at    | SMYD4           | 1,567778694  | 1,64909809   | -0,0813194  |  |
| 206853_s_at  | MAP3K7          | 2,11992033   | 2,201267805  | -0,08134748 |  |
| 218200_s_at  | NDUFB2          | 6,756510261  | 6,837860176  | -0,08134991 |  |
| 224481_s_at  | HECTD1          | 4,898781575  | 4,980136916  | -0,08135534 |  |
| 1553993_s_at | MED25           | 4,869581942  | 4,950954742  | -0,0813728  |  |
| 223954_x_at  | NECAB3          | 1,119359127  | 1,200746069  | -0,08138694 |  |
| 207238_s_at  | PTPRC           | 2,849652795  | 2,93104672   | -0,08139392 |  |
| 225549_at    | DDX6            | 3,034656185  | 3,116064987  | -0,0814088  |  |
| 200611_s_at  | WDR1            | 5,114511584  | 5,19595081   | -0,08143923 |  |
| 1560774_at   | -               | -0,543051993 | -0,461594427 | -0,08145757 |  |
| 1563075_s_at | -               | -0,543051993 | -0,461594427 | -0,08145757 |  |
| 1570447_at   | LINC00452       | -0,543051993 | -0,461594427 | -0,08145757 |  |
| 210644_s_at  | LAIR1           | -0,543051993 | -0,461594427 | -0,08145757 |  |
| 210922_at    | -               | -0,543051993 | -0,461594427 | -0,08145757 |  |
| 217070_at    | MTHFR           | -0,543051993 | -0,461594427 | -0,08145757 |  |
| 217369_at    | IGHG1 /// LOC10 | -0,543051993 | -0,461594427 | -0,08145757 |  |
| 219010_at    | C1orf106        | -0,543051993 | -0,461594427 | -0,08145757 |  |
| 220996_s_at  | SHCBP1L         | -0,543051993 | -0,461594427 | -0,08145757 |  |
| 221426_s_at  | OR3A3           | -0,543051993 | -0,461594427 | -0,08145757 |  |
| 233885_at    | ARHGAP33        | -0,543051993 | -0,461594427 | -0,08145757 |  |
| 235450_at    | -               | -0,543051993 | -0,461594427 | -0,08145757 |  |
| 242066_at    | -               | -0,543051993 | -0,461594427 | -0,08145757 |  |
| 200731_s_at  | PTP4A1          | 3,877954598  | 3,959421856  | -0,08146726 |  |
| 218979_at    | RMI1            | 2,86748657   | 2,949006836  | -0,08152027 |  |
| 218146_at    | GLT8D1          | 4,329411337  | 4,411005377  | -0,08159404 |  |
| 1554740_a_at | IPP             | -0,022466681 | 0,059218869  | -0,08168555 |  |
| 210062_s_at  | ZNF589          | -0,022466681 | 0,059218869  | -0,08168555 |  |
| 210477_x_at  | MAPK8           | -0,022466681 | 0,059218869  | -0,08168555 |  |
| 228197_at    | C1orf86         | -0,022466681 | 0,059218869  | -0,08168555 |  |
| 230526_at    | LOC100131096    | -0,022466681 | 0,059218869  | -0,08168555 |  |
| 242010_at    | -               | -0,022466681 | 0,059218869  | -0,08168555 |  |
| 208680_at    | PRDX1           | 6,327691746  | 6,409469401  | -0,08177765 |  |
| 205541_s_at  | GSPT2           | 3,67603922   | 3,757867094  | -0,08182787 |  |
| 200098_s_at  | ANAPC5          | 5,14499041   | 5,226856009  | -0,0818656  |  |
| 238009_at    | SOX5            | 0,822971223  | 0,904843258  | -0,08187204 |  |
| 201243_s_at  | ATP1B1          | 1,296557217  | 1,378453643  | -0,08189643 |  |
| 203364_s_at  | ATG13           | 1,937784532  | 2,019703483  | -0,08191895 |  |
| 1562981_at   | HBB             | 0,97328325   | 1,055274826  | -0,08199158 |  |
| 218630_at    | MKS1            | 0,97328325   | 1,055274826  | -0,08199158 |  |
| 204682_at    | LTBP2           | 0,351548291  | 0,433557298  | -0,08200901 |  |
| 219435_at    | CTC1            | 0,351548291  | 0,433557298  | -0,08200901 |  |
| 223460_at    | CAMKK1          | 0,351548291  | 0,433557298  | -0,08200901 |  |
| 236176_at    | -               | 0,351548291  | 0,433557298  | -0,08200901 |  |
| 236195_x_at  | PRKCG           | 0,351548291  | 0,433557298  | -0,08200901 |  |
| 211974_x_at  | RBPJ            | 4,220877403  | 4,302892559  | -0,08201516 |  |
| 224740_at    | C5orf43         | 4,945005542  | 5,027065771  | -0,08206023 |  |
| 225416_at    | RLIM            | 3,508091848  | 3,590171466  | -0,08207962 |  |
| 224583_at    | COTL1           | 4,716052947  | 4,798142978  | -0,08209003 |  |
| 208799_at    | PSMB5           | 5,268138741  | 5,350243676  | -0,08210493 |  |
| 216550_x_at  | ANKRD12         | 0,555999837  | 0,638150376  | -0,08215054 |  |
| 235078_at    | -               | 0,555999837  | 0,638150376  | -0,08215054 |  |
| 223318_s_at  | ALKBH7          | 3,715139632  | 3,797294336  | -0,0821547  |  |
| 211379_x_at  | B3GALNT1        | 1,69307511   | 1,775255987  | -0,08218088 |  |
| 203064_s_at  | FOXK2           | 2,817903185  | 2,900133867  | -0,08223068 |  |
| 231423_s_at  | ANKRD16         | 0,735041319  | 0,817300337  | -0,08225902 |  |

|              |                |              |              |             |  |
|--------------|----------------|--------------|--------------|-------------|--|
| 224761_at    | GNA13          | 4,861076493  | 4,943393743  | -0,08231725 |  |
| 223287_s_at  | FOXP1          | 2,577249059  | 2,659583735  | -0,08233468 |  |
| 1552588_a_at | CNBD1          | -2,972500237 | -2,89013181  | -0,08236843 |  |
| 1559203_s_at | KRAS           | -2,972500237 | -2,89013181  | -0,08236843 |  |
| 1562582_at   | -              | -2,972500237 | -2,89013181  | -0,08236843 |  |
| 1565874_at   | -              | -2,972500237 | -2,89013181  | -0,08236843 |  |
| 1570491_at   | -              | -2,972500237 | -2,89013181  | -0,08236843 |  |
| 204844_at    | ENPEP          | -2,972500237 | -2,89013181  | -0,08236843 |  |
| 207109_at    | POU2F3         | -2,972500237 | -2,89013181  | -0,08236843 |  |
| 216796_s_at  | -              | -2,972500237 | -2,89013181  | -0,08236843 |  |
| 217519_at    | -              | -2,972500237 | -2,89013181  | -0,08236843 |  |
| 223810_at    | KLHL1          | -2,972500237 | -2,89013181  | -0,08236843 |  |
| 226302_at    | ATP8B1         | -2,972500237 | -2,89013181  | -0,08236843 |  |
| 233160_at    | DEFB129        | -2,972500237 | -2,89013181  | -0,08236843 |  |
| 233463_at    | RASSF6         | -2,972500237 | -2,89013181  | -0,08236843 |  |
| 234340_at    | -              | -2,972500237 | -2,89013181  | -0,08236843 |  |
| 237476_at    | -              | -2,972500237 | -2,89013181  | -0,08236843 |  |
| 237751_x_at  | -              | -2,972500237 | -2,89013181  | -0,08236843 |  |
| 239321_at    | LOC441454      | -2,972500237 | -2,89013181  | -0,08236843 |  |
| 241806_at    | -              | -2,972500237 | -2,89013181  | -0,08236843 |  |
| 244106_at    | -              | -2,972500237 | -2,89013181  | -0,08236843 |  |
| 202469_s_at  | CPSF6          | 4,49104529   | 4,573447849  | -0,08240256 |  |
| 202941_at    | NDUFV2         | 4,979922808  | 5,062398002  | -0,08247519 |  |
| 213504_at    | COPS6          | 2,644299732  | 2,726791458  | -0,08249173 |  |
| 218852_at    | PPP2R3C        | 4,103509368  | 4,186016868  | -0,0825075  |  |
| 204166_at    | SBNO2          | 0,228146222  | 0,310717132  | -0,08257091 |  |
| 232757_at    | -              | 0,228146222  | 0,310717132  | -0,08257091 |  |
| 204216_s_at  | ZC3H14         | 3,955734299  | 4,038328982  | -0,08259468 |  |
| 201926_s_at  | CD55           | 3,017453847  | 3,100079607  | -0,08262576 |  |
| 1564521_x_at | PRMT5          | 4,093441556  | 4,176080404  | -0,08263885 |  |
| 201536_at    | DUSP3          | 2,369762403  | 2,452428893  | -0,08266649 |  |
| 226414_s_at  | ANAPC11        | 5,267019456  | 5,349723764  | -0,08270431 |  |
| 214076_at    | GFOD2          | 1,163336153  | 1,246149888  | -0,08281373 |  |
| 202256_at    | CD2BP2         | 1,593009234  | 1,675891488  | -0,08288225 |  |
| 235727_at    | KLHL28         | 2,064305961  | 2,147243253  | -0,08293729 |  |
| 212016_s_at  | PTBP1          | 3,495722611  | 3,578681277  | -0,08295867 |  |
| 225858_s_at  | XIAP           | 2,520143371  | 2,603119255  | -0,08297588 |  |
| 203822_s_at  | ELF2           | 2,90394695   | 2,986947093  | -0,08300014 |  |
| 202729_s_at  | LTBP1          | 3,266269388  | 3,349287209  | -0,08301782 |  |
| 207541_s_at  | EXOSC10        | 3,377277984  | 3,460374487  | -0,0830965  |  |
| 202799_at    | CLPP           | 3,220746604  | 3,303845028  | -0,08309842 |  |
| 1555388_s_at | SNX25          | -0,366776884 | -0,283667828 | -0,08310906 |  |
| 1562885_at   | -              | -0,366776884 | -0,283667828 | -0,08310906 |  |
| 206600_s_at  | SLC16A5        | -0,366776884 | -0,283667828 | -0,08310906 |  |
| 217610_at    | SPDYE2         | -0,366776884 | -0,283667828 | -0,08310906 |  |
| 222260_at    | -              | -0,366776884 | -0,283667828 | -0,08310906 |  |
| 224181_at    | LINC00470      | -0,366776884 | -0,283667828 | -0,08310906 |  |
| 213933_at    | PTGER3         | 2,493593689  | 2,576704359  | -0,08311067 |  |
| 59697_at     | RAB15          | 1,902179876  | 1,98530622   | -0,08312634 |  |
| 235750_at    | -              | 1,883312263  | 1,966439221  | -0,08312696 |  |
| 214882_s_at  | SRSF2          | 5,906749591  | 5,989883566  | -0,08313397 |  |
| 224674_at    | TTYH3          | 1,094335495  | 1,177496821  | -0,08316133 |  |
| 237064_x_at  | -              | 0,95671774   | 1,039887232  | -0,08316949 |  |
| 215794_x_at  | GLUD2          | 4,242108456  | 4,32527877   | -0,08317031 |  |
| 205823_at    | RGS12          | 0,334552598  | 0,417770464  | -0,08321787 |  |
| 216531_at    | MBTPS2 /// YY2 | 0,334552598  | 0,417770464  | -0,08321787 |  |

|              |                 |              |              |             |  |
|--------------|-----------------|--------------|--------------|-------------|--|
| 232400_at    | -               | 0,334552598  | 0,417770464  | -0,08321787 |  |
| 216944_s_at  | ITPR1           | 2,305800198  | 2,389070873  | -0,08327068 |  |
| 219623_at    | ACTR5           | 2,247975581  | 2,331254065  | -0,08327848 |  |
| 212153_at    | POGZ            | 3,092667038  | 3,175947691  | -0,08328065 |  |
| 1553015_a_at | RECQL4          | 3,008105382  | 3,091398163  | -0,08329278 |  |
| 205882_x_at  | ADD3            | 3,526916747  | 3,61027875   | -0,083362   |  |
| 210416_s_at  | CHEK2           | 3,526916747  | 3,61027875   | -0,083362   |  |
| 201565_s_at  | ID2             | 2,652894659  | 2,7363693    | -0,08347464 |  |
| 235884_at    | LOC644794       | 1,153678675  | 1,23718272   | -0,08350404 |  |
| 236388_at    | STRN            | 1,153678675  | 1,23718272   | -0,08350404 |  |
| 1552843_at   | SLC26A1         | -1,196375121 | -1,112851844 | -0,08352328 |  |
| 1557652_a_at | LOC348817       | -1,196375121 | -1,112851844 | -0,08352328 |  |
| 1559020_a_at | -               | -1,196375121 | -1,112851844 | -0,08352328 |  |
| 1560513_at   | LOC400568       | -1,196375121 | -1,112851844 | -0,08352328 |  |
| 208493_at    | HOXA11          | -1,196375121 | -1,112851844 | -0,08352328 |  |
| 208520_at    | OR10H3          | -1,196375121 | -1,112851844 | -0,08352328 |  |
| 210818_s_at  | BACH1 /// GRIK1 | -1,196375121 | -1,112851844 | -0,08352328 |  |
| 210865_at    | FASLG           | -1,196375121 | -1,112851844 | -0,08352328 |  |
| 217331_at    | -               | -1,196375121 | -1,112851844 | -0,08352328 |  |
| 217699_at    | -               | -1,196375121 | -1,112851844 | -0,08352328 |  |
| 219026_s_at  | RASAL2          | -1,196375121 | -1,112851844 | -0,08352328 |  |
| 221371_at    | TNFSF18         | -1,196375121 | -1,112851844 | -0,08352328 |  |
| 230665_at    | GUCY1A2         | -1,196375121 | -1,112851844 | -0,08352328 |  |
| 233802_at    | -               | -1,196375121 | -1,112851844 | -0,08352328 |  |
| 234088_at    | -               | -1,196375121 | -1,112851844 | -0,08352328 |  |
| 239359_at    | 11.03.15        | -1,196375121 | -1,112851844 | -0,08352328 |  |
| 239727_at    | DIO3OS /// MIR1 | -1,196375121 | -1,112851844 | -0,08352328 |  |
| 240352_at    | -               | -1,196375121 | -1,112851844 | -0,08352328 |  |
| 1553030_a_at | SUOX            | -0,57445847  | -0,490927335 | -0,08353114 |  |
| 204272_at    | LGALS4          | -0,57445847  | -0,490927335 | -0,08353114 |  |
| 205927_s_at  | CTSE            | -0,57445847  | -0,490927335 | -0,08353114 |  |
| 206517_at    | CDH16           | -0,57445847  | -0,490927335 | -0,08353114 |  |
| 207346_at    | STX2            | -0,57445847  | -0,490927335 | -0,08353114 |  |
| 210246_s_at  | ABCC8           | -0,57445847  | -0,490927335 | -0,08353114 |  |
| 210369_at    | SWAP70          | -0,57445847  | -0,490927335 | -0,08353114 |  |
| 228384_s_at  | PYROXD2         | -0,57445847  | -0,490927335 | -0,08353114 |  |
| 228475_at    | CCDC61          | -0,57445847  | -0,490927335 | -0,08353114 |  |
| 231537_at    | -               | -0,57445847  | -0,490927335 | -0,08353114 |  |
| 234604_at    | -               | -0,57445847  | -0,490927335 | -0,08353114 |  |
| 244207_at    | -               | -0,57445847  | -0,490927335 | -0,08353114 |  |
| 211730_s_at  | POLR2L          | 5,997613938  | 6,08119037   | -0,08357643 |  |
| 1553709_a_at | PRPF38A         | 3,828735867  | 3,912315453  | -0,08357959 |  |
| 209834_at    | CHST3           | 1,758252436  | 1,841838775  | -0,08358634 |  |
| 226288_s_at  | NLGN2           | 1,758252436  | 1,841838775  | -0,08358634 |  |
| 224849_at    | TTC17           | 3,50998543   | 3,593688577  | -0,08370315 |  |
| 221506_s_at  | TNPO2           | 5,278173421  | 5,361892418  | -0,083719   |  |
| 225302_at    | TMX3            | 3,472604685  | 3,556324192  | -0,08371951 |  |
| 207922_s_at  | MAEA            | 3,86543671   | 3,949162156  | -0,08372545 |  |
| 1556885_at   | LAYN            | -2,930741289 | -2,847001814 | -0,08373947 |  |
| 1560425_s_at | LOC100506247    | -2,930741289 | -2,847001814 | -0,08373947 |  |
| 1562035_at   | -               | -2,930741289 | -2,847001814 | -0,08373947 |  |
| 207177_at    | PTGFR           | -2,930741289 | -2,847001814 | -0,08373947 |  |
| 215151_at    | DOCK10          | -2,930741289 | -2,847001814 | -0,08373947 |  |
| 220324_at    | LINC00472       | -2,930741289 | -2,847001814 | -0,08373947 |  |
| 220327_at    | VGLL3           | -2,930741289 | -2,847001814 | -0,08373947 |  |
| 228979_at    | SFTA3           | -2,930741289 | -2,847001814 | -0,08373947 |  |

|              |                 |              |              |             |  |
|--------------|-----------------|--------------|--------------|-------------|--|
| 229254_at    | MFSD4           | -2,930741289 | -2,847001814 | -0,08373947 |  |
| 230825_at    | -               | -2,930741289 | -2,847001814 | -0,08373947 |  |
| 232679_at    | -               | -2,930741289 | -2,847001814 | -0,08373947 |  |
| 233926_at    | -               | -2,930741289 | -2,847001814 | -0,08373947 |  |
| 234142_at    | -               | -2,930741289 | -2,847001814 | -0,08373947 |  |
| 234538_at    | -               | -2,930741289 | -2,847001814 | -0,08373947 |  |
| 240961_at    | -               | -2,930741289 | -2,847001814 | -0,08373947 |  |
| 241441_at    | -               | -2,930741289 | -2,847001814 | -0,08373947 |  |
| 241566_at    | -               | -2,930741289 | -2,847001814 | -0,08373947 |  |
| 241567_at    | -               | -2,930741289 | -2,847001814 | -0,08373947 |  |
| 241676_x_at  | -               | -2,930741289 | -2,847001814 | -0,08373947 |  |
| 204295_at    | SURF1           | 3,692807389  | 3,77655538   | -0,08374799 |  |
| 217841_s_at  | PPME1           | 3,211467103  | 3,295230443  | -0,08376334 |  |
| 201676_x_at  | PSMA1           | 5,248424768  | 5,332197571  | -0,0837728  |  |
| 226810_at    | OGFRL1          | 1,210676994  | 1,294497133  | -0,08382014 |  |
| 202667_s_at  | SLC39A7         | 2,380152406  | 2,464004877  | -0,08385247 |  |
| 207457_s_at  | LY6G6D          | 2,380152406  | 2,464004877  | -0,08385247 |  |
| 225921_at    | NIN             | 2,380152406  | 2,464004877  | -0,08385247 |  |
| 212627_s_at  | EXOSC7          | 4,647605722  | 4,731460135  | -0,08385441 |  |
| 1557415_s_at | LETM2           | 0,209623097  | 0,293518836  | -0,08389574 |  |
| 207031_at    | NKX3-2          | 0,209623097  | 0,293518836  | -0,08389574 |  |
| 212253_x_at  | DST /// LOC1006 | 0,209623097  | 0,293518836  | -0,08389574 |  |
| 227824_at    | PRKCB           | 0,209623097  | 0,293518836  | -0,08389574 |  |
| 229249_at    | -               | 0,209623097  | 0,293518836  | -0,08389574 |  |
| 1558605_at   | -               | 0,945567441  | 1,029536893  | -0,08396945 |  |
| 205184_at    | GNG4            | 1,751865623  | 1,835911187  | -0,08404556 |  |
| 211250_s_at  | SH3BP2          | -0,055687482 | 0,028364014  | -0,0840515  |  |
| 223456_s_at  | TCHP            | -0,055687482 | 0,028364014  | -0,0840515  |  |
| 227443_at    | LURAP1L         | -0,055687482 | 0,028364014  | -0,0840515  |  |
| 230815_at    | LOC389765       | -0,055687482 | 0,028364014  | -0,0840515  |  |
| 239324_at    | -               | -0,055687482 | 0,028364014  | -0,0840515  |  |
| 239628_at    | -               | -0,055687482 | 0,028364014  | -0,0840515  |  |
| 229292_at    | EPB41L5         | 0,792179257  | 0,876248481  | -0,08406922 |  |
| 211744_s_at  | CD58            | 2,014487247  | 2,098562556  | -0,08407531 |  |
| 238612_at    | -               | 2,621710292  | 2,705818724  | -0,08410843 |  |
| 201825_s_at  | SCCPDH          | 3,924130004  | 4,008336597  | -0,08420659 |  |
| 221812_at    | FBXO42          | 1,789769151  | 1,874012195  | -0,08424304 |  |
| 200628_s_at  | WARS            | 3,562021138  | 3,646288546  | -0,08426741 |  |
| 223133_at    | TMEM14B         | 6,128172153  | 6,212448198  | -0,08427604 |  |
| 206858_s_at  | HOXC6           | 1,706348269  | 1,790660532  | -0,08431226 |  |
| 203436_at    | RPP30           | 5,01334758   | 5,097659882  | -0,0843123  |  |
| 221528_s_at  | ELMO2           | 2,501229299  | 2,585563171  | -0,08433387 |  |
| 225552_x_at  | AURKAIP1        | 5,23646577   | 5,320836197  | -0,08437043 |  |
| 201986_at    | MED13           | 2,450859799  | 2,53523821   | -0,08437841 |  |
| 225044_at    | NT5C3L          | 3,77777851   | 3,862161446  | -0,08438294 |  |
| 1569478_s_at | -               | 2,261526912  | 2,345926937  | -0,08440002 |  |
| 218757_s_at  | UPF3B           | 3,902669169  | 3,987098381  | -0,08442921 |  |
| 228097_at    | MYLIP           | 1,523472489  | 1,60795124   | -0,08447875 |  |
| 203748_x_at  | RBMS1           | 2,422991296  | 2,507538456  | -0,08454716 |  |
| 1554260_a_at | FRYL            | 1,139070151  | 1,223626587  | -0,08455644 |  |
| 231297_at    | DOT1L           | 1,139070151  | 1,223626587  | -0,08455644 |  |
| 232183_at    | SERAC1          | 1,422536444  | 1,507116528  | -0,08458008 |  |
| 212387_at    | TCF4            | 1,659347917  | 1,743944487  | -0,08459657 |  |
| 213213_at    | DIDO1           | 1,659347917  | 1,743944487  | -0,08459657 |  |
| 224898_at    | WDR26           | 0,702292136  | 0,786897721  | -0,08460559 |  |
| 225912_at    | TP53INP1        | 3,833280332  | 3,917937882  | -0,08465755 |  |



|             |                  |              |              |             |  |
|-------------|------------------|--------------|--------------|-------------|--|
| 205429_s_at | MPP6             | 1,314003737  | 1,398700978  | -0,08469724 |  |
| 231317_at   | -                | 1,314003737  | 1,398700978  | -0,08469724 |  |
| 219177_at   | BRIX1            | 3,394805732  | 3,479511525  | -0,08470579 |  |
| 1560430_at  | NKPD1            | 0,072842263  | 0,157549243  | -0,08470698 |  |
| 202637_s_at | ICAM1            | 0,072842263  | 0,157549243  | -0,08470698 |  |
| 229140_at   | ZNF579           | 1,742232072  | 1,826973888  | -0,08474182 |  |
| 208881_x_at | IDI1             | 4,374280229  | 4,459038     | -0,08475777 |  |
| 209378_s_at | FAM190B          | 0,518867317  | 0,603679647  | -0,08481233 |  |
| 224638_at   | SPPL3            | 0,518867317  | 0,603679647  | -0,08481233 |  |
| 229535_at   | PTPMT1           | 0,518867317  | 0,603679647  | -0,08481233 |  |
| 230385_at   | 03.03.15         | 0,518867317  | 0,603679647  | -0,08481233 |  |
| 222593_s_at | SPATS2           | 1,859746653  | 1,944570415  | -0,08482376 |  |
| 210014_x_at | IDH3B            | 4,582512819  | 4,667398257  | -0,08488544 |  |
| 218713_at   | NARG2            | 1,968405881  | 2,053299695  | -0,08489381 |  |
| 229113_s_at | C1orf86          | 1,968405881  | 2,053299695  | -0,08489381 |  |
| 229539_at   | ABCB8            | 2,338135744  | 2,423075926  | -0,08494018 |  |
| 33323_r_at  | SFN              | -0,221591371 | -0,136639081 | -0,08495229 |  |
| 212593_s_at | MIR4680 /// PDC  | 4,940800221  | 5,025764514  | -0,08496429 |  |
| 238783_at   | TMEM161B         | 0,779676066  | 0,864649967  | -0,0849739  |  |
| 220408_x_at | FAM48A           | 3,148435161  | 3,233443554  | -0,08500839 |  |
| 1553083_at  | -                | -0,221656139 | -0,136643983 | -0,08501216 |  |
| 1554631_at  | ATM              | -0,221656139 | -0,136643983 | -0,08501216 |  |
| 1560136_at  | ARL5C            | -0,221656139 | -0,136643983 | -0,08501216 |  |
| 207059_at   | PAX9             | -0,221656139 | -0,136643983 | -0,08501216 |  |
| 209621_s_at | PDLIM3           | -0,221656139 | -0,136643983 | -0,08501216 |  |
| 223730_at   | GPC6             | -0,221656139 | -0,136643983 | -0,08501216 |  |
| 233079_at   | -                | -0,221656139 | -0,136643983 | -0,08501216 |  |
| 225699_at   | SNHG15           | 4,231245055  | 4,316259488  | -0,08501443 |  |
| 38157_at    | DOM3Z            | 2,337069487  | 2,422087133  | -0,08501765 |  |
| 208721_s_at | ANAPC5           | 2,758612869  | 2,843651104  | -0,08503824 |  |
| 201786_s_at | ADAR             | 4,563036682  | 4,648076762  | -0,08504008 |  |
| 213691_at   | -                | 0,30867765   | 0,393761504  | -0,08508385 |  |
| 214727_at   | BRCA2            | 1,251994932  | 1,337086025  | -0,08509109 |  |
| 201614_s_at | RUVBL1           | 4,477561042  | 4,562720691  | -0,08515965 |  |
| 224639_at   | SPPL3            | 3,098971025  | 3,184136378  | -0,08516535 |  |
| 219092_s_at | IPPK             | 1,735773781  | 1,820984782  | -0,085211   |  |
| 221831_at   | LUZP1            | 1,735773781  | 1,820984782  | -0,085211   |  |
| 209456_s_at | FBXW11           | 0,606430281  | 0,691645685  | -0,0852154  |  |
| 217367_s_at | ZHX3             | 0,606430281  | 0,691645685  | -0,0852154  |  |
| 240440_at   | NPL              | 0,606430281  | 0,691645685  | -0,0852154  |  |
| 228098_s_at | MYLIP            | 4,393896578  | 4,479143747  | -0,08524717 |  |
| 215983_s_at | UBXN8            | 3,795741421  | 3,880994209  | -0,08525279 |  |
| 213643_s_at | INPP5B           | 1,129248302  | 1,214517879  | -0,08526958 |  |
| 1554318_at  | LOC541473        | -1,240169874 | -1,154897679 | -0,0852722  |  |
| 1558848_at  | LOC100653281     | -1,240169874 | -1,154897679 | -0,0852722  |  |
| 1561940_at  | LOC100128843     | -1,240169874 | -1,154897679 | -0,0852722  |  |
| 210593_at   | KIAA0913 /// SAT | -1,240169874 | -1,154897679 | -0,0852722  |  |
| 211419_s_at | CHN2             | -1,240169874 | -1,154897679 | -0,0852722  |  |
| 212667_at   | LOC100505813 /   | -1,240169874 | -1,154897679 | -0,0852722  |  |
| 213495_s_at | -                | -1,240169874 | -1,154897679 | -0,0852722  |  |
| 216203_at   | SPTLC2           | -1,240169874 | -1,154897679 | -0,0852722  |  |
| 217389_s_at | ATF5             | -1,240169874 | -1,154897679 | -0,0852722  |  |
| 219452_at   | DPEP2            | -1,240169874 | -1,154897679 | -0,0852722  |  |
| 220908_at   | CCDC33           | -1,240169874 | -1,154897679 | -0,0852722  |  |
| 223781_x_at | ADH4             | -1,240169874 | -1,154897679 | -0,0852722  |  |
| 232114_at   | MED12L           | -1,240169874 | -1,154897679 | -0,0852722  |  |

|              |                 |              |              |             |  |
|--------------|-----------------|--------------|--------------|-------------|--|
| 243253_at    | -               | -1,240169874 | -1,154897679 | -0,0852722  |  |
| 243688_at    | MGC45800        | -1,240169874 | -1,154897679 | -0,0852722  |  |
| 44563_at     | WRAP53          | 2,997346717  | 3,082664161  | -0,08531744 |  |
| 40020_at     | CELSR3          | 1,58225013   | 1,66757188   | -0,08532175 |  |
| 239375_at    | -               | 1,305306849  | 1,390636111  | -0,08532926 |  |
| 223330_s_at  | SUGT1           | 2,713311265  | 2,798646381  | -0,08533512 |  |
| 223279_s_at  | UACA            | 2,277177578  | 2,362515214  | -0,08533764 |  |
| 1553732_s_at | CEP89           | 1,649074067  | 1,73441697   | -0,0853429  |  |
| 1552644_a_at | PHC3            | -0,85085127  | -0,765504029 | -0,08534724 |  |
| 1553532_a_at | ZNF341          | -0,85085127  | -0,765504029 | -0,08534724 |  |
| 1567286_at   | OR5L2           | -0,85085127  | -0,765504029 | -0,08534724 |  |
| 211920_at    | CFB             | -0,85085127  | -0,765504029 | -0,08534724 |  |
| 221955_at    | -               | -0,85085127  | -0,765504029 | -0,08534724 |  |
| 227721_at    | CPAMD8          | -0,85085127  | -0,765504029 | -0,08534724 |  |
| 234291_s_at  | SLC6A20         | -0,85085127  | -0,765504029 | -0,08534724 |  |
| 234828_at    | -               | -0,85085127  | -0,765504029 | -0,08534724 |  |
| 236025_at    | NCOR2           | -0,85085127  | -0,765504029 | -0,08534724 |  |
| 237256_at    | FBXL12          | -0,85085127  | -0,765504029 | -0,08534724 |  |
| 237775_x_at  | -               | -0,85085127  | -0,765504029 | -0,08534724 |  |
| 244092_at    | ZRANB3          | -0,85085127  | -0,765504029 | -0,08534724 |  |
| 212001_at    | SUGP2           | 2,535098095  | 2,620464265  | -0,08536617 |  |
| 213346_at    | TEX30           | 2,535098095  | 2,620464265  | -0,08536617 |  |
| 227345_at    | TNFRSF10D       | 2,030406107  | 2,115788273  | -0,08538217 |  |
| 208343_s_at  | NR5A2           | 1,850809354  | 1,936283387  | -0,08547403 |  |
| 201537_s_at  | DUSP3           | 0,995078803  | 1,080561626  | -0,08548282 |  |
| 241965_at    | -               | 0,995078803  | 1,080561626  | -0,08548282 |  |
| 213196_at    | ZNF629          | 1,556829052  | 1,642321262  | -0,08549221 |  |
| 226275_at    | MXD1            | 2,752227654  | 2,837730973  | -0,08550332 |  |
| 213270_at    | MPP2            | 1,187200746  | 1,272721751  | -0,085521   |  |
| 222708_s_at  | STX17           | 1,187200746  | 1,272721751  | -0,085521   |  |
| 219161_s_at  | CKLF /// CKLF-C | 4,053102157  | 4,138648509  | -0,08554635 |  |
| 224939_at    | NUFIP2          | 3,484209953  | 3,569779975  | -0,08557002 |  |
| 1555004_a_at | RBL1            | -0,078265071 | 0,007421914  | -0,08568699 |  |
| 204660_at    | GFER            | -0,078265071 | 0,007421914  | -0,08568699 |  |
| 208417_at    | FGF6            | -0,078265071 | 0,007421914  | -0,08568699 |  |
| 209632_at    | PPP2R3A         | -0,078265071 | 0,007421914  | -0,08568699 |  |
| 211888_x_at  | CASP10          | -0,078265071 | 0,007421914  | -0,08568699 |  |
| 224113_at    | CARD14          | -0,078265071 | 0,007421914  | -0,08568699 |  |
| 232182_at    | LOC286272       | -0,078265071 | 0,007421914  | -0,08568699 |  |
| 236263_at    | SHH             | -0,078265071 | 0,007421914  | -0,08568699 |  |
| 242646_at    | -               | -0,078265071 | 0,007421914  | -0,08568699 |  |
| 224929_at    | TMEM173         | 2,327437554  | 2,413157372  | -0,08571982 |  |
| 229640_x_at  | LINC00621       | 4,681605321  | 4,767329587  | -0,08572427 |  |
| 31835_at     | HRG             | -1,086066686 | -1,000301604 | -0,08576508 |  |
| 221755_at    | EHBP1L1         | 1,504602299  | 1,590454215  | -0,08585192 |  |
| 205012_s_at  | HAGH            | 2,151803104  | 2,237691445  | -0,08588834 |  |
| 212771_at    | FAM171A1        | 4,492003645  | 4,577894064  | -0,08589042 |  |
| 201135_at    | ECHS1           | 5,24444944   | 5,330354131  | -0,08590469 |  |
| 204081_at    | NRGN            | 1,844820248  | 1,930732138  | -0,08591189 |  |
| 1554602_at   | RBM8A           | 0,503742507  | 0,589657387  | -0,08591488 |  |
| 204138_s_at  | MZF1            | 0,181384709  | 0,26733076   | -0,08594605 |  |
| 1552585_s_at | GTF2A1L         | -2,866296344 | -2,780313924 | -0,08598242 |  |
| 1554494_at   | MTHFSD          | -2,866296344 | -2,780313924 | -0,08598242 |  |
| 1555829_at   | ESYT2           | -2,866296344 | -2,780313924 | -0,08598242 |  |
| 1555929_s_at | -               | -2,866296344 | -2,780313924 | -0,08598242 |  |
| 1557921_s_at | LOC100506498    | -2,866296344 | -2,780313924 | -0,08598242 |  |

|              |                   |              |              |             |  |
|--------------|-------------------|--------------|--------------|-------------|--|
| 1559542_a_at | -                 | -2,866296344 | -2,780313924 | -0,08598242 |  |
| 1559884_at   | CDKN2B-AS1        | -2,866296344 | -2,780313924 | -0,08598242 |  |
| 1560775_at   | -                 | -2,866296344 | -2,780313924 | -0,08598242 |  |
| 1561368_at   | -                 | -2,866296344 | -2,780313924 | -0,08598242 |  |
| 1562306_at   | -                 | -2,866296344 | -2,780313924 | -0,08598242 |  |
| 1563207_at   | C3orf65           | -2,866296344 | -2,780313924 | -0,08598242 |  |
| 1566109_at   | MYNN              | -2,866296344 | -2,780313924 | -0,08598242 |  |
| 1566860_at   | LOC145663         | -2,866296344 | -2,780313924 | -0,08598242 |  |
| 1569231_x_at | -                 | -2,866296344 | -2,780313924 | -0,08598242 |  |
| 204410_at    | EIF1AY            | -2,866296344 | -2,780313924 | -0,08598242 |  |
| 206434_at    | SPOCK3            | -2,866296344 | -2,780313924 | -0,08598242 |  |
| 207142_at    | KCNJ3             | -2,866296344 | -2,780313924 | -0,08598242 |  |
| 215655_at    | GRIK2             | -2,866296344 | -2,780313924 | -0,08598242 |  |
| 222320_at    | -                 | -2,866296344 | -2,780313924 | -0,08598242 |  |
| 224029_x_at  | SCN11A            | -2,866296344 | -2,780313924 | -0,08598242 |  |
| 230609_at    | CLINT1            | -2,866296344 | -2,780313924 | -0,08598242 |  |
| 231842_at    | KIAA1462          | -2,866296344 | -2,780313924 | -0,08598242 |  |
| 233133_at    | -                 | -2,866296344 | -2,780313924 | -0,08598242 |  |
| 237433_at    | -                 | -2,866296344 | -2,780313924 | -0,08598242 |  |
| 240599_x_at  | -                 | -2,866296344 | -2,780313924 | -0,08598242 |  |
| 240631_at    | GPR98             | -2,866296344 | -2,780313924 | -0,08598242 |  |
| 241094_at    | -                 | -2,866296344 | -2,780313924 | -0,08598242 |  |
| 241539_at    | -                 | -2,866296344 | -2,780313924 | -0,08598242 |  |
| 244386_at    | -                 | -2,866296344 | -2,780313924 | -0,08598242 |  |
| 213867_x_at  | ACTB /// LOC100   | 7,868410054  | 7,95440346   | -0,08599341 |  |
| 219539_at    | GEMIN6            | 3,296204798  | 3,382199319  | -0,08599452 |  |
| 226007_at    | ISCA2             | 3,880884266  | 3,966899535  | -0,08601527 |  |
| 226204_at    | C22orf29          | 1,764611101  | 1,85068474   | -0,08607364 |  |
| 207391_s_at  | PIP5K1A           | 2,266015882  | 2,352169913  | -0,08615403 |  |
| 212595_s_at  | DAZAP2            | 4,002888213  | 4,08904909   | -0,08616088 |  |
| 208884_s_at  | UBR5              | 4,321346382  | 4,407512498  | -0,08616612 |  |
| 213370_s_at  | SFMBT1            | 2,084778276  | 2,170981159  | -0,08620288 |  |
| 227291_s_at  | BOLA3             | 5,814188355  | 5,90041503   | -0,08622667 |  |
| 1555384_a_at | LARP4             | 1,292162421  | 1,378453643  | -0,08629122 |  |
| 218935_at    | EHD3              | 1,292162421  | 1,378453643  | -0,08629122 |  |
| 218680_x_at  | C15orf63 /// MIR1 | 4,991828339  | 5,078176444  | -0,08634811 |  |
| 202928_s_at  | PHF1              | 1,114389003  | 1,200746069  | -0,08635707 |  |
| 231820_x_at  | ZNF587            | 0,760715727  | 0,847075464  | -0,08635974 |  |
| 1565763_at   | C13orf33          | 0,291166226  | 0,377530647  | -0,08636442 |  |
| 215399_s_at  | OS9               | 2,371846398  | 2,458228496  | -0,0863821  |  |
| 224858_at    | ZDHC5             | 3,262904562  | 3,349287209  | -0,08638265 |  |
| 223803_s_at  | ZCCHC10           | 1,835789711  | 1,922365006  | -0,0865753  |  |
| 203652_at    | MAP3K11           | 1,394109935  | 1,480766833  | -0,0866569  |  |
| 241775_at    | -                 | 1,394109935  | 1,480766833  | -0,0866569  |  |
| 218976_at    | DNAJC12           | 3,735513868  | 3,822243651  | -0,08672978 |  |
| 210570_x_at  | MAPK9             | 1,672933557  | 1,759685182  | -0,08675163 |  |
| 219117_s_at  | FKBP11            | 1,672933557  | 1,759685182  | -0,08675163 |  |
| 212616_at    | CHD9              | 2,693452197  | 2,780243895  | -0,0867917  |  |
| 209852_x_at  | PSME3             | 3,312571045  | 3,399383202  | -0,08681216 |  |
| 219276_x_at  | CAAP1             | 4,027552846  | 4,114368048  | -0,0868152  |  |
| 1552695_a_at | SLC2A13           | -0,622910612 | -0,536087151 | -0,08682346 |  |
| 211393_at    | PATZ1             | -0,622910612 | -0,536087151 | -0,08682346 |  |
| 217450_at    | AGFG2             | -0,622910612 | -0,536087151 | -0,08682346 |  |
| 220271_x_at  | EFCAB6            | -0,622910612 | -0,536087151 | -0,08682346 |  |
| 228877_at    | RGL3              | -0,622910612 | -0,536087151 | -0,08682346 |  |
| 233435_at    | -                 | -0,622910612 | -0,536087151 | -0,08682346 |  |

|              |                |              |              |             |  |
|--------------|----------------|--------------|--------------|-------------|--|
| 226958_s_at  | MED11          | 2,227406889  | 2,314300277  | -0,08689339 |  |
| 227916_x_at  | EXOSC3         | 4,428847862  | 4,515755502  | -0,08690764 |  |
| 223189_x_at  | MLL5           | 3,074867907  | 3,161800893  | -0,08693299 |  |
| 230779_at    | TNRC6B         | 1,283332461  | 1,370274469  | -0,08694201 |  |
| 222697_s_at  | ABHD10         | 3,182077878  | 3,269073685  | -0,08699581 |  |
| 200779_at    | ATF4           | 5,829622933  | 5,916653471  | -0,08703054 |  |
| 205482_x_at  | SNX15          | 2,166283906  | 2,253342112  | -0,08705821 |  |
| 224733_at    | CMTM3          | 3,088871381  | 3,175947691  | -0,08707631 |  |
| 218086_at    | NPDC1          | 1,104397092  | 1,191491281  | -0,08709419 |  |
| 235623_at    | ELP2           | 1,709647566  | 1,796776588  | -0,08712902 |  |
| 226262_at    | DHX33          | 3,179700672  | 3,266872397  | -0,08717173 |  |
| 206559_x_at  | -              | 8,254987863  | 8,342182994  | -0,08719513 |  |
| 212251_at    | MTDH           | 4,334228758  | 4,42143356   | -0,0872048  |  |
| 224742_at    | ABHD12         | 2,102456302  | 2,189694216  | -0,08723791 |  |
| 232034_at    | LINC00537      | 0,747935635  | 0,835239052  | -0,08730342 |  |
| 1552532_a_at | ATP6V1C2       | -2,823166348 | -2,735862426 | -0,08730392 |  |
| 1555018_at   | OR2C3          | -2,823166348 | -2,735862426 | -0,08730392 |  |
| 1555317_at   | POLK           | -2,823166348 | -2,735862426 | -0,08730392 |  |
| 1557742_a_at | LOC100128176   | -2,823166348 | -2,735862426 | -0,08730392 |  |
| 1559492_at   | LOC100506844   | -2,823166348 | -2,735862426 | -0,08730392 |  |
| 1566695_at   | -              | -2,823166348 | -2,735862426 | -0,08730392 |  |
| 1567657_at   | OR2H1          | -2,823166348 | -2,735862426 | -0,08730392 |  |
| 1567663_at   | -              | -2,823166348 | -2,735862426 | -0,08730392 |  |
| 1569760_at   | -              | -2,823166348 | -2,735862426 | -0,08730392 |  |
| 219936_s_at  | GPR87          | -2,823166348 | -2,735862426 | -0,08730392 |  |
| 222970_at    | -              | -2,823166348 | -2,735862426 | -0,08730392 |  |
| 231615_at    | -              | -2,823166348 | -2,735862426 | -0,08730392 |  |
| 233603_at    | -              | -2,823166348 | -2,735862426 | -0,08730392 |  |
| 234615_at    | -              | -2,823166348 | -2,735862426 | -0,08730392 |  |
| 236325_at    | KIAA1377       | -2,823166348 | -2,735862426 | -0,08730392 |  |
| 236360_at    | FLJ42875       | -2,823166348 | -2,735862426 | -0,08730392 |  |
| 237770_at    | -              | -2,823166348 | -2,735862426 | -0,08730392 |  |
| 237989_at    | IGFBP1         | -2,823166348 | -2,735862426 | -0,08730392 |  |
| 241524_at    | -              | -2,823166348 | -2,735862426 | -0,08730392 |  |
| 242623_x_at  | PSMG4          | -2,823166348 | -2,735862426 | -0,08730392 |  |
| 207801_s_at  | RNF10          | 3,037284587  | 3,124599694  | -0,08731511 |  |
| 219783_at    | C2orf18        | 1,331241794  | 1,418668082  | -0,08742629 |  |
| 222894_x_at  | NDUFAF5        | 2,745814053  | 2,833274877  | -0,08746082 |  |
| 1553162_x_at | C19orf55       | 2,247975581  | 2,335461563  | -0,08748598 |  |
| 225243_s_at  | LOC100287789 / | 2,967339888  | 3,05486507   | -0,08752518 |  |
| 224464_s_at  | NUDT22         | 1,932146506  | 2,019703483  | -0,08755698 |  |
| 35671_at     | GTF3C1         | 3,426229985  | 3,513795401  | -0,08756542 |  |
| 206901_at    | C19orf57       | 1,965648824  | 2,053299695  | -0,08765087 |  |
| 202869_at    | OAS1           | 1,215326747  | 1,303116084  | -0,08778934 |  |
| 221960_s_at  | RAB2A          | 1,215326747  | 1,303116084  | -0,08778934 |  |
| 1554281_at   | -              | -3,32387526  | -3,236070201 | -0,08780506 |  |
| 1555102_at   | FGF7           | -3,32387526  | -3,236070201 | -0,08780506 |  |
| 1561080_at   | TXNRD1         | -3,32387526  | -3,236070201 | -0,08780506 |  |
| 1561110_at   | -              | -3,32387526  | -3,236070201 | -0,08780506 |  |
| 1568287_at   | HMGA2          | -3,32387526  | -3,236070201 | -0,08780506 |  |
| 243183_at    | -              | -3,32387526  | -3,236070201 | -0,08780506 |  |
| 222528_s_at  | SLC25A37       | 4,163687338  | 4,251494565  | -0,08780723 |  |
| 202110_at    | COX7B          | 6,455214428  | 6,543035536  | -0,08782111 |  |
| 213551_x_at  | PCGF2          | 2,429008604  | 2,516830926  | -0,08782232 |  |
| 228273_at    | PRR11          | 4,325653301  | 4,413495123  | -0,08784182 |  |
| 213384_x_at  | PLCB3          | 0,57058931   | 0,658444279  | -0,08785497 |  |

|              |                 |              |              |             |  |
|--------------|-----------------|--------------|--------------|-------------|--|
| 239794_at    | -               | 1,269985355  | 1,3579181    | -0,08793275 |  |
| 222775_s_at  | MRPL35          | 1,995690482  | 2,083632167  | -0,08794168 |  |
| 1555923_a_at | C10orf114       | -1,308181863 | -1,220210588 | -0,08797128 |  |
| 1568923_at   | -               | -1,308181863 | -1,220210588 | -0,08797128 |  |
| 206292_s_at  | SULT2A1         | -1,308181863 | -1,220210588 | -0,08797128 |  |
| 209970_x_at  | CASP1           | -1,308181863 | -1,220210588 | -0,08797128 |  |
| 211771_s_at  | POU2F2          | -1,308181863 | -1,220210588 | -0,08797128 |  |
| 214409_at    | RFPL3-AS1       | -1,308181863 | -1,220210588 | -0,08797128 |  |
| 220098_at    | HYDIN           | -1,308181863 | -1,220210588 | -0,08797128 |  |
| 220505_at    | C9orf53         | -1,308181863 | -1,220210588 | -0,08797128 |  |
| 226846_at    | PHYHD1          | -1,308181863 | -1,220210588 | -0,08797128 |  |
| 231327_at    | -               | -1,308181863 | -1,220210588 | -0,08797128 |  |
| 219048_at    | PIGN            | 2,546213279  | 2,634191677  | -0,0879784  |  |
| 203513_at    | SPG11           | 2,450859799  | 2,538891651  | -0,08803185 |  |
| 220742_s_at  | NGLY1           | 3,767525744  | 3,855584709  | -0,08805897 |  |
| 222524_s_at  | ASB6            | 1,027166904  | 1,115234684  | -0,08806778 |  |
| 212943_at    | KIAA0528        | 2,976955384  | 3,065035915  | -0,08808053 |  |
| 231836_at    | HKR1            | 3,48613512   | 3,574237491  | -0,08810237 |  |
| 224656_s_at  | LUZP6 /// MTPN  | 5,957414239  | 6,045518595  | -0,08810436 |  |
| 237378_at    | FAM75D1 /// FAN | 0,888485433  | 0,976641161  | -0,08815573 |  |
| 242366_at    | -               | 0,888485433  | 0,976641161  | -0,08815573 |  |
| 214089_at    | RPS8            | -0,43775896  | -0,34958478  | -0,08817418 |  |
| 217102_at    | -               | -0,43775896  | -0,34958478  | -0,08817418 |  |
| 231627_at    | LOC100505619    | -0,43775896  | -0,34958478  | -0,08817418 |  |
| 235822_at    | COQ9            | -0,43775896  | -0,34958478  | -0,08817418 |  |
| 239367_at    | BDNF            | -0,43775896  | -0,34958478  | -0,08817418 |  |
| 241627_x_at  | ARHGEF40        | -0,43775896  | -0,34958478  | -0,08817418 |  |
| 217990_at    | GMPR2           | 3,674351634  | 3,76256191   | -0,08821028 |  |
| 201333_s_at  | ARHGEF12        | 1,089278259  | 1,177496821  | -0,08821856 |  |
| 206904_at    | MATN1           | -0,112808516 | -0,024572586 | -0,08823593 |  |
| 221191_at    | STAG3L1         | -0,112808516 | -0,024572586 | -0,08823593 |  |
| 236108_at    | EPG5            | -0,112808516 | -0,024572586 | -0,08823593 |  |
| 238006_at    | SIN3A           | -0,112808516 | -0,024572586 | -0,08823593 |  |
| 224815_at    | COMMD7          | 4,748093662  | 4,836499048  | -0,08840539 |  |
| 218463_s_at  | MUS81           | 2,732900676  | 2,821324225  | -0,08842355 |  |
| 209152_s_at  | TCF3            | 1,732533761  | 1,820984782  | -0,08845102 |  |
| 209790_s_at  | CASP6           | 3,220746604  | 3,309203139  | -0,08845653 |  |
| 235470_at    | NAA38           | 2,691784869  | 2,780243895  | -0,08845903 |  |
| 203882_at    | IRF9            | 3,085065712  | 3,173599504  | -0,08853379 |  |
| 220320_at    | DOK3            | 0,020670649  | 0,109221392  | -0,08855074 |  |
| 200812_at    | CCT7            | 6,226312258  | 6,314885577  | -0,08857332 |  |
| 1560738_at   | -               | 0,648296226  | 0,73688026   | -0,08858403 |  |
| 1553424_at   | C12orf40        | -2,779459409 | -2,690860744 | -0,08859866 |  |
| 1556289_at   | -               | -2,779459409 | -2,690860744 | -0,08859866 |  |
| 1556927_at   | KCNK10          | -2,779459409 | -2,690860744 | -0,08859866 |  |
| 1557161_at   | LOC100132735    | -2,779459409 | -2,690860744 | -0,08859866 |  |
| 1557763_at   | LPAR6           | -2,779459409 | -2,690860744 | -0,08859866 |  |
| 1558034_s_at | CP              | -2,779459409 | -2,690860744 | -0,08859866 |  |
| 1558210_at   | SRC             | -2,779459409 | -2,690860744 | -0,08859866 |  |
| 1558689_a_at | LOC441461       | -2,779459409 | -2,690860744 | -0,08859866 |  |
| 1559483_at   | PROX1-AS1       | -2,779459409 | -2,690860744 | -0,08859866 |  |
| 1561272_at   | -               | -2,779459409 | -2,690860744 | -0,08859866 |  |
| 1561881_at   | LOC100505718    | -2,779459409 | -2,690860744 | -0,08859866 |  |
| 1562755_at   | -               | -2,779459409 | -2,690860744 | -0,08859866 |  |
| 1563162_at   | -               | -2,779459409 | -2,690860744 | -0,08859866 |  |
| 1564244_a_at | LOC100506195    | -2,779459409 | -2,690860744 | -0,08859866 |  |

|              |            |              |              |             |  |
|--------------|------------|--------------|--------------|-------------|--|
| 1565860_at   | -          | -2,779459409 | -2,690860744 | -0,08859866 |  |
| 1565978_a_at | -          | -2,779459409 | -2,690860744 | -0,08859866 |  |
| 1568749_at   | -          | -2,779459409 | -2,690860744 | -0,08859866 |  |
| 1568892_at   | -          | -2,779459409 | -2,690860744 | -0,08859866 |  |
| 1570103_at   | -          | -2,779459409 | -2,690860744 | -0,08859866 |  |
| 1570579_at   | -          | -2,779459409 | -2,690860744 | -0,08859866 |  |
| 213516_at    | AKAP13     | -2,779459409 | -2,690860744 | -0,08859866 |  |
| 216190_x_at  | ITGB1      | -2,779459409 | -2,690860744 | -0,08859866 |  |
| 220509_at    | RBM26      | -2,779459409 | -2,690860744 | -0,08859866 |  |
| 228565_at    | KIAA1804   | -2,779459409 | -2,690860744 | -0,08859866 |  |
| 230075_at    | RAB39B     | -2,779459409 | -2,690860744 | -0,08859866 |  |
| 236896_at    | ZIC1       | -2,779459409 | -2,690860744 | -0,08859866 |  |
| 236911_at    | RIMKLB     | -2,779459409 | -2,690860744 | -0,08859866 |  |
| 237381_at    | -          | -2,779459409 | -2,690860744 | -0,08859866 |  |
| 237839_at    | -          | -2,779459409 | -2,690860744 | -0,08859866 |  |
| 237967_at    | HAL        | -2,779459409 | -2,690860744 | -0,08859866 |  |
| 237991_at    | -          | -2,779459409 | -2,690860744 | -0,08859866 |  |
| 241673_x_at  | -          | -2,779459409 | -2,690860744 | -0,08859866 |  |
| 219245_s_at  | OGFOD2     | 1,261018186  | 1,349621332  | -0,08860315 |  |
| 225330_at    | IGF1R      | 2,72965419   | 2,81832103   | -0,08866684 |  |
| 210512_s_at  | VEGFA      | 3,647078281  | 3,735753654  | -0,08867537 |  |
| 204480_s_at  | C9orf16    | 2,232003119  | 2,320681318  | -0,0886782  |  |
| 229446_at    | -          | 0,46522187   | 0,553993624  | -0,08877175 |  |
| 208880_s_at  | PRPF6      | 2,842156496  | 2,93104672   | -0,08889022 |  |
| 213151_s_at  | 39326      | 5,367305637  | 5,456197384  | -0,08889175 |  |
| 203629_s_at  | COG5       | 1,841816345  | 1,930732138  | -0,08891579 |  |
| 217844_at    | CTDSP1     | 1,841816345  | 1,930732138  | -0,08891579 |  |
| 1569029_at   | METAP1D    | -0,655928373 | -0,566887459 | -0,08904091 |  |
| 205587_at    | FGFR1OP    | -0,655928373 | -0,566887459 | -0,08904091 |  |
| 222374_at    | BTRC       | -0,655928373 | -0,566887459 | -0,08904091 |  |
| 227838_at    | UNC5C      | -0,655928373 | -0,566887459 | -0,08904091 |  |
| 235205_at    | OXR1       | -0,655928373 | -0,566887459 | -0,08904091 |  |
| 239711_at    | ADAL       | -0,655928373 | -0,566887459 | -0,08904091 |  |
| 214037_s_at  | CCDC22     | 1,360921491  | 1,450051551  | -0,08913006 |  |
| 222209_s_at  | TMEM135    | 3,092667038  | 3,181801492  | -0,08913445 |  |
| 218323_at    | RHOT1      | 3,45992606   | 3,549096127  | -0,08917007 |  |
| 226588_at    | CWC22      | 2,926807124  | 3,016072743  | -0,08926562 |  |
| 208977_x_at  | TUBB4B     | 6,051588195  | 6,140855729  | -0,08926753 |  |
| 215357_s_at  | POLDIP3    | 1,638726528  | 1,728030156  | -0,08930363 |  |
| 201589_at    | SMC1A      | 5,470947875  | 5,560301949  | -0,08935407 |  |
| 218455_at    | NFS1       | 1,976645579  | 2,066015817  | -0,08937024 |  |
| 222642_s_at  | TMEM33     | 3,394805732  | 3,484256382  | -0,08945065 |  |
| 209302_at    | POLR2H     | 4,806654012  | 4,896108401  | -0,08945439 |  |
| 215023_s_at  | PEX1       | 0,87091093   | 0,960386719  | -0,08947579 |  |
| 219742_at    | PRR7       | 0,87091093   | 0,960386719  | -0,08947579 |  |
| 232373_at    | NOXA1      | 0,133056859  | 0,222599095  | -0,08954224 |  |
| 210976_s_at  | PFKM       | 1,191926657  | 1,281471383  | -0,08954473 |  |
| 1553460_at   | C2orf61    | -1,353583928 | -1,264005341 | -0,08957859 |  |
| 1556183_at   | ANKRD36BP2 | -1,353583928 | -1,264005341 | -0,08957859 |  |
| 1565908_at   | NADSYN1    | -1,353583928 | -1,264005341 | -0,08957859 |  |
| 208059_at    | CCR8       | -1,353583928 | -1,264005341 | -0,08957859 |  |
| 211731_x_at  | SSX3       | -1,353583928 | -1,264005341 | -0,08957859 |  |
| 215288_at    | TRPC2      | -1,353583928 | -1,264005341 | -0,08957859 |  |
| 215335_at    | -          | -1,353583928 | -1,264005341 | -0,08957859 |  |
| 216792_at    | -          | -1,353583928 | -1,264005341 | -0,08957859 |  |
| 220274_at    | IQCA1      | -1,353583928 | -1,264005341 | -0,08957859 |  |

|              |              |              |              |             |  |
|--------------|--------------|--------------|--------------|-------------|--|
| 223427_s_at  | EPB41L4B     | -1,353583928 | -1,264005341 | -0,08957859 |  |
| 223572_at    | HHATL        | -1,353583928 | -1,264005341 | -0,08957859 |  |
| 223783_s_at  | DBIL5P       | -1,353583928 | -1,264005341 | -0,08957859 |  |
| 229290_at    | DAPL1        | -1,353583928 | -1,264005341 | -0,08957859 |  |
| 230113_at    | MBNL3        | -1,353583928 | -1,264005341 | -0,08957859 |  |
| 231734_at    | RBP2         | -1,353583928 | -1,264005341 | -0,08957859 |  |
| 231971_at    | FANCM        | -1,353583928 | -1,264005341 | -0,08957859 |  |
| 232869_at    | SRGAP3       | -1,353583928 | -1,264005341 | -0,08957859 |  |
| 232936_at    | KCNA7        | -1,353583928 | -1,264005341 | -0,08957859 |  |
| 235262_at    | ZNF585B      | -1,353583928 | -1,264005341 | -0,08957859 |  |
| 240350_at    | -            | -1,353583928 | -1,264005341 | -0,08957859 |  |
| 243156_at    | -            | -1,353583928 | -1,264005341 | -0,08957859 |  |
| 243400_x_at  | LTBR         | -1,353583928 | -1,264005341 | -0,08957859 |  |
| 244060_at    | -            | -1,353583928 | -1,264005341 | -0,08957859 |  |
| 244712_at    | MEX3D        | -1,353583928 | -1,264005341 | -0,08957859 |  |
| 200732_s_at  | PTP4A1       | 4,436335206  | 4,525916104  | -0,0895809  |  |
| 206723_s_at  | LPAR2        | 1,454352496  | 1,543943227  | -0,08959073 |  |
| 226546_at    | LOC100506844 | 3,686960673  | 3,77655538   | -0,08959471 |  |
| 201101_s_at  | BCLAF1       | 3,655656719  | 3,745272377  | -0,08961566 |  |
| 1558097_at   | PRR14L       | 3,354274239  | 3,443906002  | -0,08963176 |  |
| 235866_at    | C9orf85      | 0,246434561  | 0,336136178  | -0,08970162 |  |
| 206888_s_at  | ARHGDIG      | -0,285837228 | -0,19610998  | -0,08972725 |  |
| 228551_at    | DENND5B      | -0,285837228 | -0,19610998  | -0,08972725 |  |
| 238347_at    | SLC38A10     | -0,285837228 | -0,19610998  | -0,08972725 |  |
| 234949_at    | FRG1B        | 0,715481152  | 0,805216064  | -0,08973491 |  |
| 236248_x_at  | TADA2B       | 1,352503698  | 1,442269454  | -0,08976576 |  |
| 225291_at    | PNPT1        | 4,806268808  | 4,896108401  | -0,08983959 |  |
| 202031_s_at  | WIPI2        | 4,090280902  | 4,180180181  | -0,08989928 |  |
| 212896_at    | SKIV2L2      | 4,201088424  | 4,291026333  | -0,08993791 |  |
| 223451_s_at  | CKLF         | 4,002215714  | 4,092160663  | -0,08994495 |  |
| 226910_at    | COMMD2       | 3,425226911  | 3,515187047  | -0,08996014 |  |
| 203655_at    | XRCC1        | 1,751865623  | 1,841838775  | -0,08997315 |  |
| 205929_at    | GPA33        | -0,136301282 | -0,046302147 | -0,08999914 |  |
| 207226_at    | HIST1H2BN    | -0,136301282 | -0,046302147 | -0,08999914 |  |
| 219246_s_at  | OGFOD2       | -0,136301282 | -0,046302147 | -0,08999914 |  |
| 201206_s_at  | RRBP1        | 1,58584542   | 1,675891488  | -0,09004607 |  |
| 202471_s_at  | IDH3G        | 2,750626925  | 2,840694075  | -0,09006715 |  |
| 223265_at    | SH3BP5L      | 1,063722698  | 1,153866761  | -0,09014406 |  |
| 239406_at    | ZNF193       | 1,063722698  | 1,153866761  | -0,09014406 |  |
| 203259_s_at  | HDDC2        | 5,410522015  | 5,500666341  | -0,09014433 |  |
| 202260_s_at  | STXBP1       | 1,446464021  | 1,536652708  | -0,09018869 |  |
| 200022_at    | RPL18        | 7,793430219  | 7,883707986  | -0,09027777 |  |
| 204247_s_at  | CDK5         | 4,457095376  | 4,547386035  | -0,09029066 |  |
| 209439_s_at  | PHKA2        | 2,604089881  | 2,694398145  | -0,09030826 |  |
| 206764_x_at  | MPPE1        | 0,859074518  | 0,949447784  | -0,09037327 |  |
| 224000_at    | C2orf16      | 0,859074518  | 0,949447784  | -0,09037327 |  |
| 229212_at    | -            | 0,859074518  | 0,949447784  | -0,09037327 |  |
| 225090_at    | SYVN1        | 1,706348269  | 1,796776588  | -0,09042832 |  |
| 205761_s_at  | DUS4L        | 2,512607472  | 2,603119255  | -0,09051178 |  |
| 1552682_a_at | CASC5        | 0,44160593   | 0,532164371  | -0,09055844 |  |
| 232790_at    | LOC100506054 | 0,44160593   | 0,532164371  | -0,09055844 |  |
| 236481_at    | FAH          | 0,44160593   | 0,532164371  | -0,09055844 |  |
| 202734_at    | TRIP10       | 1,534677255  | 1,6252386    | -0,09056135 |  |
| 230068_s_at  | PEG3-AS1     | 1,534677255  | 1,6252386    | -0,09056135 |  |
| 205586_x_at  | VGF          | 3,255587071  | 3,346162854  | -0,09057578 |  |
| 204837_at    | MTMR9        | 2,976955384  | 3,067567462  | -0,09061208 |  |

|              |                 |              |              |             |  |
|--------------|-----------------|--------------|--------------|-------------|--|
| 206821_x_at  | AGFG2           | 0,533835206  | 0,624460759  | -0,09062555 |  |
| 214779_s_at  | SGSM3           | 0,533835206  | 0,624460759  | -0,09062555 |  |
| 227660_at    | ANTXR1          | 0,533835206  | 0,624460759  | -0,09062555 |  |
| 232231_at    | RUNX2           | 0,533835206  | 0,624460759  | -0,09062555 |  |
| 204366_s_at  | GTF3C2          | 3,301680869  | 3,392332256  | -0,09065139 |  |
| 203633_at    | CPT1A           | 1,233777334  | 1,324440845  | -0,09066351 |  |
| 225499_at    | RALGAPA2        | 1,233777334  | 1,324440845  | -0,09066351 |  |
| 217918_at    | DYNLRB1         | 5,412801045  | 5,503473699  | -0,09067265 |  |
| 1553472_at   | FLJ32955        | -2,712026959 | -2,621331989 | -0,09069497 |  |
| 1556990_at   | PERP            | -2,712026959 | -2,621331989 | -0,09069497 |  |
| 1557107_at   | SLC26A4-AS1     | -2,712026959 | -2,621331989 | -0,09069497 |  |
| 1557564_at   | LOC100507300    | -2,712026959 | -2,621331989 | -0,09069497 |  |
| 1560548_at   | -               | -2,712026959 | -2,621331989 | -0,09069497 |  |
| 1561817_at   | -               | -2,712026959 | -2,621331989 | -0,09069497 |  |
| 1562161_at   | -               | -2,712026959 | -2,621331989 | -0,09069497 |  |
| 1562850_at   | -               | -2,712026959 | -2,621331989 | -0,09069497 |  |
| 1563494_at   | -               | -2,712026959 | -2,621331989 | -0,09069497 |  |
| 1565621_at   | -               | -2,712026959 | -2,621331989 | -0,09069497 |  |
| 1567179_at   | -               | -2,712026959 | -2,621331989 | -0,09069497 |  |
| 1569921_at   | -               | -2,712026959 | -2,621331989 | -0,09069497 |  |
| 213782_s_at  | MYOZ2           | -2,712026959 | -2,621331989 | -0,09069497 |  |
| 214827_at    | PARD6B          | -2,712026959 | -2,621331989 | -0,09069497 |  |
| 215851_at    | MECOM           | -2,712026959 | -2,621331989 | -0,09069497 |  |
| 216297_at    | -               | -2,712026959 | -2,621331989 | -0,09069497 |  |
| 217175_at    | UGT2B15         | -2,712026959 | -2,621331989 | -0,09069497 |  |
| 220298_s_at  | SPATA6          | -2,712026959 | -2,621331989 | -0,09069497 |  |
| 231628_s_at  | SERPINB6        | -2,712026959 | -2,621331989 | -0,09069497 |  |
| 233050_at    | KIAA0408 /// SO | -2,712026959 | -2,621331989 | -0,09069497 |  |
| 234492_at    | -               | -2,712026959 | -2,621331989 | -0,09069497 |  |
| 236420_s_at  | ANO4            | -2,712026959 | -2,621331989 | -0,09069497 |  |
| 237667_at    | -               | -2,712026959 | -2,621331989 | -0,09069497 |  |
| 238483_at    | SSBP2           | -2,712026959 | -2,621331989 | -0,09069497 |  |
| 240041_at    | PTCHD1          | -2,712026959 | -2,621331989 | -0,09069497 |  |
| 241772_at    | -               | -2,712026959 | -2,621331989 | -0,09069497 |  |
| 242450_at    | RGMB            | -2,712026959 | -2,621331989 | -0,09069497 |  |
| 243262_at    | -               | -2,712026959 | -2,621331989 | -0,09069497 |  |
| 203627_at    | IGF1R           | 1,339784194  | 1,43051703   | -0,09073284 |  |
| 1554417_s_at | APH1A           | 2,661438684  | 2,752192409  | -0,09075373 |  |
| 1558253_x_at | ZNF587 /// ZNF5 | 1,390002893  | 1,480766833  | -0,09076394 |  |
| 225573_at    | ACAD11 /// NPH  | 1,889144008  | 1,979940779  | -0,09079677 |  |
| 200007_at    | SRP14           | 6,631516481  | 6,72231942   | -0,09080294 |  |
| 34406_at     | PACS2           | 1,363018287  | 1,453926914  | -0,09090863 |  |
| 204878_s_at  | TAOK2           | 1,05337236   | 1,144305291  | -0,09093293 |  |
| 225705_at    | CEP95           | 1,05337236   | 1,144305291  | -0,09093293 |  |
| 200889_s_at  | SSR1            | 4,471743273  | 4,562720691  | -0,09097742 |  |
| 213031_s_at  | WDR73           | 1,954567604  | 2,045615873  | -0,09104827 |  |
| 208943_s_at  | SEC62           | 4,172082885  | 4,263136983  | -0,0910541  |  |
| 213166_x_at  | MIR4784 /// MZT | 4,090280902  | 4,181349409  | -0,09106851 |  |
| 233929_x_at  | WASH3P          | 3,962664437  | 4,053733117  | -0,09106868 |  |
| 1560347_at   | -               | -0,946847173 | -0,855751026 | -0,09109615 |  |
| 1562759_at   | -               | -0,946847173 | -0,855751026 | -0,09109615 |  |
| 202490_at    | IKBKAP          | -0,946847173 | -0,855751026 | -0,09109615 |  |
| 205139_s_at  | UST             | -0,946847173 | -0,855751026 | -0,09109615 |  |
| 207960_at    | -               | -0,946847173 | -0,855751026 | -0,09109615 |  |
| 209321_s_at  | ADCY3           | -0,946847173 | -0,855751026 | -0,09109615 |  |
| 211981_at    | COL4A1          | -0,946847173 | -0,855751026 | -0,09109615 |  |



|              |                  |              |              |             |  |
|--------------|------------------|--------------|--------------|-------------|--|
| 215996_at    | -                | -0,946847173 | -0,855751026 | -0,09109615 |  |
| 220013_at    | EPHX3            | -0,946847173 | -0,855751026 | -0,09109615 |  |
| 221368_at    | NEU2             | -0,946847173 | -0,855751026 | -0,09109615 |  |
| 228407_at    | SCUBE3           | -0,946847173 | -0,855751026 | -0,09109615 |  |
| 229687_s_at  | PRDM11           | -0,946847173 | -0,855751026 | -0,09109615 |  |
| 230772_at    | HNF4A            | -0,946847173 | -0,855751026 | -0,09109615 |  |
| 231333_at    | LOC100505515     | -0,946847173 | -0,855751026 | -0,09109615 |  |
| 233458_at    | POLR3E           | -0,946847173 | -0,855751026 | -0,09109615 |  |
| 236183_at    | DYNC1H1          | -0,946847173 | -0,855751026 | -0,09109615 |  |
| 244250_at    | ANXA6            | -0,946847173 | -0,855751026 | -0,09109615 |  |
| 201465_s_at  | JUN              | 1,434549838  | 1,525647381  | -0,09109754 |  |
| 220239_at    | KLHL7            | 3,142344098  | 3,233443554  | -0,09109946 |  |
| 218514_at    | SMG8             | 3,373122675  | 3,464222256  | -0,09109958 |  |
| 225829_at    | PDZD8            | 2,635653293  | 2,726791458  | -0,09113817 |  |
| 208824_x_at  | CDK16            | 2,281618189  | 2,372786857  | -0,09116867 |  |
| 204835_at    | POLA1            | 3,784051878  | 3,875225653  | -0,09117377 |  |
| 223364_s_at  | DHX37            | 1,735773781  | 1,826973888  | -0,09120011 |  |
| 201677_at    | C3orf37          | 0,613492853  | 0,704715219  | -0,09122237 |  |
| 225220_at    | SNHG8            | 4,989115724  | 5,08037172   | -0,091256   |  |
| 222435_s_at  | UBE2J1           | 3,408067074  | 3,499335901  | -0,09126883 |  |
| 227603_at    | -                | 3,292909151  | 3,384231608  | -0,09132246 |  |
| 234031_at    | C20orf112        | 1,224581536  | 1,315948728  | -0,09136719 |  |
| 212487_at    | GPATCH8          | 2,568189989  | 2,659583735  | -0,09139375 |  |
| 213937_s_at  | FTSJ1            | 2,568189989  | 2,659583735  | -0,09139375 |  |
| 203334_at    | DHX8             | 1,567778694  | 1,659204017  | -0,09142532 |  |
| 233252_s_at  | STRBP            | 3,014789032  | 3,106248809  | -0,09145978 |  |
| 203292_s_at  | VPS11            | 1,880387527  | 1,971855016  | -0,09146749 |  |
| 231972_at    | -                | 1,880387527  | 1,971855016  | -0,09146749 |  |
| 45687_at     | PRR14            | 2,741791025  | 2,833274877  | -0,09148385 |  |
| 206949_s_at  | RUSC1            | 2,671625168  | 2,763166224  | -0,09154106 |  |
| 226087_at    | LZIC             | 3,076146581  | 3,16771226   | -0,09156568 |  |
| 201217_x_at  | RNU86 /// RPL3 / | 7,671995943  | 7,763654877  | -0,09165893 |  |
| 201102_s_at  | PFKL             | 2,327437554  | 2,419116683  | -0,09167913 |  |
| 208741_at    | SAP18            | 1,426552034  | 1,518263577  | -0,09171154 |  |
| 203938_s_at  | TAF1C            | 1,326951551  | 1,418668082  | -0,09171653 |  |
| 215230_x_at  | EIF3C /// EIF3CL | 5,277617766  | 5,369349853  | -0,09173209 |  |
| 213842_x_at  | NSUN5P1 /// NSU  | 3,313655555  | 3,405399563  | -0,09174401 |  |
| 203650_at    | PROCR            | 0,841135803  | 0,932882274  | -0,09174647 |  |
| 208104_s_at  | TSC22D4          | 0,841135803  | 0,932882274  | -0,09174647 |  |
| 233292_s_at  | ANKHD1 /// ANK   | 0,841135803  | 0,932882274  | -0,09174647 |  |
| 218690_at    | PDLIM4           | 0,425644434  | 0,51742585   | -0,09178142 |  |
| 220128_s_at  | NIPAL2           | 0,425644434  | 0,51742585   | -0,09178142 |  |
| 234033_at    | -                | 0,425644434  | 0,51742585   | -0,09178142 |  |
| 227325_at    | PRR24            | 2,822481847  | 2,914267328  | -0,09178548 |  |
| 218996_at    | TFPT             | 3,132544588  | 3,22439681   | -0,09185222 |  |
| 203114_at    | SSSCA1           | 3,072307152  | 3,164168347  | -0,0918612  |  |
| 1552715_a_at | RXFP1            | -2,667025278 | -2,575129729 | -0,09189555 |  |
| 1553077_at   | SDR9C7           | -2,667025278 | -2,575129729 | -0,09189555 |  |
| 1557705_a_at | -                | -2,667025278 | -2,575129729 | -0,09189555 |  |
| 1559268_at   | ADAM23           | -2,667025278 | -2,575129729 | -0,09189555 |  |
| 1560865_a_at | -                | -2,667025278 | -2,575129729 | -0,09189555 |  |
| 1561216_at   | -                | -2,667025278 | -2,575129729 | -0,09189555 |  |
| 1564150_a_at | LOC256021        | -2,667025278 | -2,575129729 | -0,09189555 |  |
| 1566608_at   | -                | -2,667025278 | -2,575129729 | -0,09189555 |  |
| 1567389_at   | -                | -2,667025278 | -2,575129729 | -0,09189555 |  |
| 1568858_at   | -                | -2,667025278 | -2,575129729 | -0,09189555 |  |

|              |              |              |              |             |  |
|--------------|--------------|--------------|--------------|-------------|--|
| 1569528_at   | -            | -2,667025278 | -2,575129729 | -0,09189555 |  |
| 1569740_at   | -            | -2,667025278 | -2,575129729 | -0,09189555 |  |
| 1569780_at   | -            | -2,667025278 | -2,575129729 | -0,09189555 |  |
| 206876_at    | SIM1         | -2,667025278 | -2,575129729 | -0,09189555 |  |
| 210521_s_at  | FETUB        | -2,667025278 | -2,575129729 | -0,09189555 |  |
| 214218_s_at  | XIST         | -2,667025278 | -2,575129729 | -0,09189555 |  |
| 215199_at    | CALD1        | -2,667025278 | -2,575129729 | -0,09189555 |  |
| 216456_at    | -            | -2,667025278 | -2,575129729 | -0,09189555 |  |
| 216516_at    | -            | -2,667025278 | -2,575129729 | -0,09189555 |  |
| 217081_at    | OR2H2        | -2,667025278 | -2,575129729 | -0,09189555 |  |
| 217585_at    | NEBL         | -2,667025278 | -2,575129729 | -0,09189555 |  |
| 222161_at    | NAALAD2      | -2,667025278 | -2,575129729 | -0,09189555 |  |
| 224028_at    | CPA6         | -2,667025278 | -2,575129729 | -0,09189555 |  |
| 224533_s_at  | -            | -2,667025278 | -2,575129729 | -0,09189555 |  |
| 227194_at    | FAM3B        | -2,667025278 | -2,575129729 | -0,09189555 |  |
| 230263_s_at  | DOCK5        | -2,667025278 | -2,575129729 | -0,09189555 |  |
| 230655_at    | -            | -2,667025278 | -2,575129729 | -0,09189555 |  |
| 233512_at    | SH3RF3-AS1   | -2,667025278 | -2,575129729 | -0,09189555 |  |
| 237580_at    | -            | -2,667025278 | -2,575129729 | -0,09189555 |  |
| 237637_at    | -            | -2,667025278 | -2,575129729 | -0,09189555 |  |
| 237803_x_at  | -            | -2,667025278 | -2,575129729 | -0,09189555 |  |
| 238391_at    | -            | -2,667025278 | -2,575129729 | -0,09189555 |  |
| 239008_at    | -            | -2,667025278 | -2,575129729 | -0,09189555 |  |
| 240667_at    | SERP2        | -2,667025278 | -2,575129729 | -0,09189555 |  |
| 241581_at    | -            | -2,667025278 | -2,575129729 | -0,09189555 |  |
| 241870_at    | -            | -2,667025278 | -2,575129729 | -0,09189555 |  |
| 243087_at    | WDR63        | -2,667025278 | -2,575129729 | -0,09189555 |  |
| 243301_at    | COL22A1      | -2,667025278 | -2,575129729 | -0,09189555 |  |
| 244760_at    | -            | -2,667025278 | -2,575129729 | -0,09189555 |  |
| 244837_at    | -            | -2,667025278 | -2,575129729 | -0,09189555 |  |
| 220688_s_at  | MRTO4        | 3,992767659  | 4,084681583  | -0,09191392 |  |
| 215470_at    | GTF2H2B      | 1,874520207  | 1,966439221  | -0,09191901 |  |
| 202072_at    | HNRNPL       | 4,284208955  | 4,376200741  | -0,09199179 |  |
| 1557049_at   | BTBD19       | -1,424023738 | -1,332017329 | -0,09200641 |  |
| 1557290_at   | DPY19L2P4    | -1,424023738 | -1,332017329 | -0,09200641 |  |
| 1558193_at   | -            | -1,424023738 | -1,332017329 | -0,09200641 |  |
| 1561004_at   | -            | -1,424023738 | -1,332017329 | -0,09200641 |  |
| 1569157_s_at | ZNF846       | -1,424023738 | -1,332017329 | -0,09200641 |  |
| 1569538_at   | -            | -1,424023738 | -1,332017329 | -0,09200641 |  |
| 206014_at    | ACTL6B       | -1,424023738 | -1,332017329 | -0,09200641 |  |
| 213308_at    | SHANK2       | -1,424023738 | -1,332017329 | -0,09200641 |  |
| 215070_x_at  | RABGAP1      | -1,424023738 | -1,332017329 | -0,09200641 |  |
| 230474_at    | UBIAD1       | -1,424023738 | -1,332017329 | -0,09200641 |  |
| 237242_at    | LOC126536    | -1,424023738 | -1,332017329 | -0,09200641 |  |
| 237342_at    | TOLLIP       | -1,424023738 | -1,332017329 | -0,09200641 |  |
| 237714_at    | -            | -1,424023738 | -1,332017329 | -0,09200641 |  |
| 237737_at    | LOC100289026 | -1,424023738 | -1,332017329 | -0,09200641 |  |
| 240099_at    | -            | -1,424023738 | -1,332017329 | -0,09200641 |  |
| 241219_at    | -            | -1,424023738 | -1,332017329 | -0,09200641 |  |
| 208673_s_at  | SRSF3        | 5,050901237  | 5,142923791  | -0,09202255 |  |
| 221768_at    | SFPQ         | 2,243430036  | 2,335461563  | -0,09203153 |  |
| 227212_s_at  | PHF19        | 3,715139632  | 3,807174423  | -0,09203479 |  |
| 208029_s_at  | LAPTM4B      | 5,718250778  | 5,810329143  | -0,09207836 |  |
| 211600_at    | PTPRO        | 5,070922065  | 5,163038015  | -0,09211595 |  |
| 216526_x_at  | HLA-C        | 6,661427392  | 6,753558289  | -0,0921309  |  |
| 204116_at    | IL2RG        | 1,037706275  | 1,129843209  | -0,09213693 |  |

|              |               |              |              |             |  |
|--------------|---------------|--------------|--------------|-------------|--|
| 200797_s_at  | MCL1          | 6,104712608  | 6,196850991  | -0,09213838 |  |
| 219673_at    | MCM9          | 2,396622324  | 2,488772006  | -0,09214968 |  |
| 218618_s_at  | FNDC3B        | 0,97328325   | 1,065442793  | -0,09215954 |  |
| 232644_x_at  | OCIAD1        | 2,663141434  | 2,755336312  | -0,09219488 |  |
| 202721_s_at  | GFPT1         | 2,621710292  | 2,713921281  | -0,09221099 |  |
| 223272_s_at  | NTPCR         | 3,171349466  | 3,263564154  | -0,09221469 |  |
| 224729_s_at  | ATPAF1        | 2,905386372  | 2,997606395  | -0,09222002 |  |
| 212267_at    | WAPAL         | 3,418185797  | 3,510542997  | -0,0923572  |  |
| 204381_at    | LRP3          | 1,318332599  | 1,410714371  | -0,09238177 |  |
| 208807_s_at  | CHD3          | 1,210676994  | 1,303116084  | -0,09243909 |  |
| 1561130_at   | C12orf51      | -0,706943342 | -0,614371577 | -0,09257177 |  |
| 206133_at    | XAF1          | -0,706943342 | -0,614371577 | -0,09257177 |  |
| 206534_at    | GRIN2A        | -0,706943342 | -0,614371577 | -0,09257177 |  |
| 207038_at    | SLC16A6       | -0,706943342 | -0,614371577 | -0,09257177 |  |
| 211178_s_at  | PSTPIP1       | -0,706943342 | -0,614371577 | -0,09257177 |  |
| 215387_x_at  | -             | -0,706943342 | -0,614371577 | -0,09257177 |  |
| 232427_at    | ZNF224        | -0,706943342 | -0,614371577 | -0,09257177 |  |
| 233409_at    | RHBDL3        | -0,706943342 | -0,614371577 | -0,09257177 |  |
| 237348_at    | -             | -0,706943342 | -0,614371577 | -0,09257177 |  |
| 237789_at    | -             | -0,706943342 | -0,614371577 | -0,09257177 |  |
| 239334_at    | ESYT2         | -0,706943342 | -0,614371577 | -0,09257177 |  |
| 239564_at    | LOC100128198  | -0,706943342 | -0,614371577 | -0,09257177 |  |
| 233702_x_at  | -             | 3,137452663  | 3,23005767   | -0,09260501 |  |
| 228318_s_at  | CRIPAK        | 1,462198073  | 1,55481039   | -0,09261232 |  |
| 204484_at    | PIK3C2B       | 2,390468117  | 2,483094137  | -0,09262602 |  |
| 212972_x_at  | APBB2         | -0,033456564 | 0,059218869  | -0,09267543 |  |
| 216668_at    | -             | -0,033456564 | 0,059218869  | -0,09267543 |  |
| 240550_at    | -             | -0,033456564 | 0,059218869  | -0,09267543 |  |
| 209524_at    | HDGFRP3       | 2,061726373  | 2,154405725  | -0,09267935 |  |
| 212583_at    | AQR           | 0,82905153   | 0,921731975  | -0,09268044 |  |
| 222770_s_at  | GUF1          | 2,030406107  | 2,123108223  | -0,09270212 |  |
| 202084_s_at  | SEC14L1       | 3,121439986  | 3,21415095   | -0,09271096 |  |
| 211623_s_at  | FBL           | 6,976903525  | 7,069652172  | -0,09274865 |  |
| 1558967_s_at | HCG18         | -0,172274514 | -0,079522948 | -0,09275157 |  |
| 1560035_at   | CXXC11        | -0,172274514 | -0,079522948 | -0,09275157 |  |
| 209957_s_at  | NPPA          | -0,172274514 | -0,079522948 | -0,09275157 |  |
| 215367_at    | KIAA1614      | -0,172274514 | -0,079522948 | -0,09275157 |  |
| 220245_at    | SLC45A2       | -0,172274514 | -0,079522948 | -0,09275157 |  |
| 234264_at    | -             | -0,172274514 | -0,079522948 | -0,09275157 |  |
| 239000_at    | BRD4          | -0,172274514 | -0,079522948 | -0,09275157 |  |
| 239523_at    | TUSC5         | -0,172274514 | -0,079522948 | -0,09275157 |  |
| 1552562_at   | ZNF570        | 0,67554678   | 0,768343791  | -0,09279701 |  |
| 1555998_at   | ATP5H         | 0,67554678   | 0,768343791  | -0,09279701 |  |
| 204696_s_at  | CDC25A        | 0,67554678   | 0,768343791  | -0,09279701 |  |
| 219186_at    | ZBTB7A        | 0,67554678   | 0,768343791  | -0,09279701 |  |
| 230998_at    | -             | 0,67554678   | 0,768343791  | -0,09279701 |  |
| 222192_s_at  | C2orf43       | 2,089851283  | 2,182705233  | -0,09285395 |  |
| 231954_at    | DKFZP434I0714 | 1,504602299  | 1,59747851   | -0,09287621 |  |
| 222795_s_at  | PLCXD1        | 0,962260738  | 1,055274826  | -0,09301409 |  |
| 203093_s_at  | TIMM44        | 2,842156496  | 2,935211251  | -0,09305476 |  |
| 201712_s_at  | RANBP2        | 2,433006244  | 2,526063925  | -0,09305768 |  |
| 200601_at    | ACTN4         | 3,877221251  | 3,970285709  | -0,09306446 |  |
| 234969_s_at  | EPC1          | 3,202127528  | 3,295230443  | -0,09310291 |  |
| 201196_s_at  | AMD1          | 4,854012234  | 4,947179196  | -0,09316696 |  |
| 201254_x_at  | RPS6          | 7,807452205  | 7,900622638  | -0,09317043 |  |
| 242277_at    | -             | 1,748661581  | 1,841838775  | -0,09317719 |  |

|              |                  |              |              |             |  |
|--------------|------------------|--------------|--------------|-------------|--|
| 201484_at    | SUPT4H1          | 2,544366685  | 2,637603218  | -0,09323653 |  |
| 213604_at    | TCEB3            | 2,544366685  | 2,637603218  | -0,09323653 |  |
| 1555083_at   | RPL13AP17        | 0,20027154   | 0,293518836  | -0,0932473  |  |
| 204105_s_at  | NRCAM            | 0,20027154   | 0,293518836  | -0,0932473  |  |
| 213295_at    | CYLD             | 0,20027154   | 0,293518836  | -0,0932473  |  |
| 225191_at    | CIRBP            | 0,20027154   | 0,293518836  | -0,0932473  |  |
| 236472_at    | -                | 0,20027154   | 0,293518836  | -0,0932473  |  |
| 218316_at    | TIMM9            | 3,554701391  | 3,647981081  | -0,09327969 |  |
| 230687_at    | SLC13A3          | 2,022468633  | 2,115788273  | -0,09331964 |  |
| 229908_s_at  | UNKL             | 2,305800198  | 2,39915583   | -0,09335563 |  |
| 226461_at    | HOXB9            | 1,021868205  | 1,115234684  | -0,09336648 |  |
| 229763_at    | FOXP4            | 0,083054335  | 0,176436073  | -0,09338174 |  |
| 231305_at    | -                | 0,083054335  | 0,176436073  | -0,09338174 |  |
| 239993_at    | LOC390705 /// LC | 0,083054335  | 0,176436073  | -0,09338174 |  |
| 229382_at    | FAM212B          | 1,305306849  | 1,398700978  | -0,09339413 |  |
| 1554195_a_at | C5orf46          | -1,470833215 | -1,377419394 | -0,09341382 |  |
| 1556520_at   | -                | -1,470833215 | -1,377419394 | -0,09341382 |  |
| 1558651_at   | LOC100507462     | -1,470833215 | -1,377419394 | -0,09341382 |  |
| 1560091_a_at | LOC100506695 /   | -1,470833215 | -1,377419394 | -0,09341382 |  |
| 1563320_at   | -                | -1,470833215 | -1,377419394 | -0,09341382 |  |
| 202269_x_at  | GBP1             | -1,470833215 | -1,377419394 | -0,09341382 |  |
| 204393_s_at  | ACPP             | -1,470833215 | -1,377419394 | -0,09341382 |  |
| 210714_at    | R3HDM1           | -1,470833215 | -1,377419394 | -0,09341382 |  |
| 214611_at    | GRIK1            | -1,470833215 | -1,377419394 | -0,09341382 |  |
| 220286_at    | MTMR10           | -1,470833215 | -1,377419394 | -0,09341382 |  |
| 221405_at    | -                | -1,470833215 | -1,377419394 | -0,09341382 |  |
| 228741_s_at  | HCN3             | -1,470833215 | -1,377419394 | -0,09341382 |  |
| 230681_at    | TBRG1            | -1,470833215 | -1,377419394 | -0,09341382 |  |
| 231395_at    | ATP8A2           | -1,470833215 | -1,377419394 | -0,09341382 |  |
| 233237_at    | -                | -1,470833215 | -1,377419394 | -0,09341382 |  |
| 235943_at    | -                | -1,470833215 | -1,377419394 | -0,09341382 |  |
| 236549_x_at  | -                | -1,470833215 | -1,377419394 | -0,09341382 |  |
| 239303_at    | PIWIL2           | -1,470833215 | -1,377419394 | -0,09341382 |  |
| 201865_x_at  | NR3C1            | 3,082523011  | 3,175947691  | -0,09342468 |  |
| 225646_at    | CTSC             | 2,450859799  | 2,544354523  | -0,09349472 |  |
| 206571_s_at  | MAP4K4           | 2,646022818  | 2,739547836  | -0,09352502 |  |
| 203891_s_at  | DAPK3            | 0,496120222  | 0,589657387  | -0,09353716 |  |
| 224809_x_at  | TINF2            | 2,987866617  | 3,081412119  | -0,0935455  |  |
| 203607_at    | INPP5F           | 4,443783893  | 4,537376044  | -0,09359215 |  |
| 212208_at    | MED13L           | 1,780386218  | 1,874012195  | -0,09362598 |  |
| 225200_at    | DPH3             | 3,852063011  | 3,945725977  | -0,09366297 |  |
| 210797_s_at  | OASL             | 0,401366113  | 0,495031851  | -0,09366574 |  |
| 227970_at    | GPR157           | 0,401366113  | 0,495031851  | -0,09366574 |  |
| 239228_at    | -                | 0,401366113  | 0,495031851  | -0,09366574 |  |
| 241896_at    | MACF1            | 0,401366113  | 0,495031851  | -0,09366574 |  |
| 1555450_a_at | NAA16            | -0,512251684 | -0,41858459  | -0,09366709 |  |
| 1570531_at   | -                | -0,512251684 | -0,41858459  | -0,09366709 |  |
| 206399_x_at  | CACNA1A          | -0,512251684 | -0,41858459  | -0,09366709 |  |
| 236011_at    | FO XK1           | -0,512251684 | -0,41858459  | -0,09366709 |  |
| 238505_at    | ADPRH            | -0,512251684 | -0,41858459  | -0,09366709 |  |
| 242499_at    | U2AF1            | -0,512251684 | -0,41858459  | -0,09366709 |  |
| 242535_at    | -                | -0,512251684 | -0,41858459  | -0,09366709 |  |
| 203376_at    | CDC40            | 3,527851575  | 3,621520989  | -0,09366941 |  |
| 208967_s_at  | AK2              | 4,899504047  | 4,993178622  | -0,09367458 |  |
| 219089_s_at  | ZNF576           | 2,048758794  | 2,14244844   | -0,09368965 |  |
| 1557765_at   | LOC643401        | -3,192553003 | -3,098858316 | -0,09369469 |  |

|              |                  |              |              |             |  |
|--------------|------------------|--------------|--------------|-------------|--|
| 1560168_at   | LOC646168        | -3,192553003 | -3,098858316 | -0,09369469 |  |
| 1561123_at   | -                | -3,192553003 | -3,098858316 | -0,09369469 |  |
| 1562089_at   | GLYATL1          | -3,192553003 | -3,098858316 | -0,09369469 |  |
| 1566323_at   | MAF              | -3,192553003 | -3,098858316 | -0,09369469 |  |
| 1567173_at   | -                | -3,192553003 | -3,098858316 | -0,09369469 |  |
| 1569661_at   | NPAS3            | -3,192553003 | -3,098858316 | -0,09369469 |  |
| 207583_at    | ABCD2            | -3,192553003 | -3,098858316 | -0,09369469 |  |
| 226228_at    | AQP4             | -3,192553003 | -3,098858316 | -0,09369469 |  |
| 229916_at    | ENPP6            | -3,192553003 | -3,098858316 | -0,09369469 |  |
| 233821_at    | -                | -3,192553003 | -3,098858316 | -0,09369469 |  |
| 234779_at    | -                | -3,192553003 | -3,098858316 | -0,09369469 |  |
| 238592_at    | -                | -3,192553003 | -3,098858316 | -0,09369469 |  |
| 240093_x_at  | -                | -3,192553003 | -3,098858316 | -0,09369469 |  |
| 242642_at    | -                | -3,192553003 | -3,098858316 | -0,09369469 |  |
| 224280_s_at  | FAM54B           | 2,107467633  | 2,201267805  | -0,09380017 |  |
| 1554288_at   | FAM160B1         | -2,597496523 | -2,503677622 | -0,0938189  |  |
| 1554931_at   | CYP4A11          | -2,597496523 | -2,503677622 | -0,0938189  |  |
| 1555692_at   | -                | -2,597496523 | -2,503677622 | -0,0938189  |  |
| 1555716_a_at | CXADR            | -2,597496523 | -2,503677622 | -0,0938189  |  |
| 1557591_at   | LOC283038        | -2,597496523 | -2,503677622 | -0,0938189  |  |
| 1558394_s_at | KRT7             | -2,597496523 | -2,503677622 | -0,0938189  |  |
| 1558601_at   | LSAMP-AS3        | -2,597496523 | -2,503677622 | -0,0938189  |  |
| 1561055_at   | LOC100507534     | -2,597496523 | -2,503677622 | -0,0938189  |  |
| 1563863_x_at | TCEANC           | -2,597496523 | -2,503677622 | -0,0938189  |  |
| 1566106_at   | -                | -2,597496523 | -2,503677622 | -0,0938189  |  |
| 1566725_at   | -                | -2,597496523 | -2,503677622 | -0,0938189  |  |
| 206318_at    | SPINLW1 /// SPII | -2,597496523 | -2,503677622 | -0,0938189  |  |
| 210143_at    | ANXA10           | -2,597496523 | -2,503677622 | -0,0938189  |  |
| 211627_x_at  | ESR1             | -2,597496523 | -2,503677622 | -0,0938189  |  |
| 215350_at    | SYNE1            | -2,597496523 | -2,503677622 | -0,0938189  |  |
| 223629_at    | PCDHB5           | -2,597496523 | -2,503677622 | -0,0938189  |  |
| 224033_at    | -                | -2,597496523 | -2,503677622 | -0,0938189  |  |
| 228322_at    | NAA30            | -2,597496523 | -2,503677622 | -0,0938189  |  |
| 229974_at    | EVC2             | -2,597496523 | -2,503677622 | -0,0938189  |  |
| 232903_at    | -                | -2,597496523 | -2,503677622 | -0,0938189  |  |
| 233407_at    | -                | -2,597496523 | -2,503677622 | -0,0938189  |  |
| 233934_at    | LOC349160        | -2,597496523 | -2,503677622 | -0,0938189  |  |
| 238050_at    | ANTXR2           | -2,597496523 | -2,503677622 | -0,0938189  |  |
| 238901_at    | LOC100505633     | -2,597496523 | -2,503677622 | -0,0938189  |  |
| 240296_at    | -                | -2,597496523 | -2,503677622 | -0,0938189  |  |
| 240536_at    | -                | -2,597496523 | -2,503677622 | -0,0938189  |  |
| 242532_at    | -                | -2,597496523 | -2,503677622 | -0,0938189  |  |
| 244528_at    | -                | -2,597496523 | -2,503677622 | -0,0938189  |  |
| 223546_x_at  | LUC7L            | 2,325288363  | 2,419116683  | -0,09382832 |  |
| 218135_at    | ERGIC2           | 3,000043914  | 3,09388391   | -0,09384    |  |
| 230651_at    | -                | 0,661985843  | 0,755840599  | -0,09385476 |  |
| 208517_x_at  | BTF3             | 6,790257557  | 6,884191563  | -0,09393401 |  |
| 213262_at    | SACS             | 4,379468341  | 4,473427782  | -0,09395944 |  |
| 203164_at    | SLC33A1          | 2,535098095  | 2,629059192  | -0,0939611  |  |
| 219976_at    | HOOK1            | 0,57782909   | 0,67181667   | -0,09398758 |  |
| 243011_at    | NXPE3            | 0,57782909   | 0,67181667   | -0,09398758 |  |
| 201371_s_at  | CUL3             | 5,190567757  | 5,284574019  | -0,09400626 |  |
| 231948_s_at  | UBE2F            | 3,133773173  | 3,227795991  | -0,09402282 |  |
| 218753_at    | XKR8             | 3,335176289  | 3,429217209  | -0,09404092 |  |
| 200095_x_at  | RPS10            | 8,274786991  | 8,368855508  | -0,09406852 |  |
| 242953_at    | ZNF234           | 1,073999308  | 1,16809119   | -0,09409188 |  |

|              |                |              |              |             |  |
|--------------|----------------|--------------|--------------|-------------|--|
| 243296_at    | NAMPT          | 1,073999308  | 1,16809119   | -0,09409188 |  |
| 235466_s_at  | -              | 0,810733188  | 0,904843258  | -0,09411007 |  |
| 222996_s_at  | CXXC5          | 4,012270435  | 4,106388091  | -0,09411766 |  |
| 204022_at    | WWP2           | 1,011212064  | 1,105412836  | -0,09420077 |  |
| 225218_at    | ZFYVE27        | 1,394109935  | 1,488344553  | -0,09423462 |  |
| 218480_at    | AGBL5          | 1,187200746  | 1,281471383  | -0,09427064 |  |
| 212100_s_at  | POLDIP3        | 3,025418883  | 3,119728903  | -0,09431002 |  |
| 204744_s_at  | IARS           | 5,940488937  | 6,034804495  | -0,09431556 |  |
| 204375_at    | CLSTN3         | 0,945567441  | 1,039887232  | -0,09431979 |  |
| 228520_s_at  | APLP2          | 0,945567441  | 1,039887232  | -0,09431979 |  |
| 228544_s_at  | CSRP2BP /// PE | 1,912238072  | 2,006570641  | -0,09433257 |  |
| 218006_s_at  | ZNF22          | 1,129248302  | 1,223626587  | -0,09437829 |  |
| 204978_at    | CLASRP         | 1,732533761  | 1,826973888  | -0,09444013 |  |
| 234000_s_at  | PTPLAD1        | 4,736818692  | 4,831294479  | -0,09447579 |  |
| 235812_at    | CNEP1R1        | 2,874852734  | 2,969455976  | -0,09460324 |  |
| 1552323_s_at | FAM122C        | -0,196756757 | -0,102100538 | -0,09465622 |  |
| 1567440_at   | PSEN1          | -0,196756757 | -0,102100538 | -0,09465622 |  |
| 203220_s_at  | TLE1           | -0,196756757 | -0,102100538 | -0,09465622 |  |
| 203723_at    | ITPKB          | -0,196756757 | -0,102100538 | -0,09465622 |  |
| 205970_at    | MT3            | -0,196756757 | -0,102100538 | -0,09465622 |  |
| 208060_at    | PAX7           | -0,196756757 | -0,102100538 | -0,09465622 |  |
| 1553123_at   | WDR62          | -1,518072576 | -1,423348341 | -0,09472423 |  |
| 1554229_at   | CREBRF         | -1,518072576 | -1,423348341 | -0,09472423 |  |
| 1563327_a_at | CXorf31        | -1,518072576 | -1,423348341 | -0,09472423 |  |
| 225894_at    | SYNPO2         | -1,518072576 | -1,423348341 | -0,09472423 |  |
| 229414_at    | PITPNC1        | -1,518072576 | -1,423348341 | -0,09472423 |  |
| 233738_at    | -              | -1,518072576 | -1,423348341 | -0,09472423 |  |
| 234756_at    | CACNG8         | -1,518072576 | -1,423348341 | -0,09472423 |  |
| 236601_at    | LOC100506484   | -1,518072576 | -1,423348341 | -0,09472423 |  |
| 240234_at    | -              | -1,518072576 | -1,423348341 | -0,09472423 |  |
| 244733_at    | -              | -1,518072576 | -1,423348341 | -0,09472423 |  |
| 201575_at    | SNW1           | 5,23875133   | 5,333512872  | -0,09476154 |  |
| 201608_s_at  | PWP1           | 4,446258267  | 4,541024081  | -0,09476581 |  |
| 1553987_at   | MAPKAPK5-AS1   | 2,003776245  | 2,098562556  | -0,09478631 |  |
| 216411_s_at  | GALK2          | -0,352951799 | -0,258114234 | -0,09483756 |  |
| 219011_at    | PLEKHA4        | -0,352951799 | -0,258114234 | -0,09483756 |  |
| 238910_at    | KIAA0664L3     | -0,352951799 | -0,258114234 | -0,09483756 |  |
| 244667_at    | -              | -0,352951799 | -0,258114234 | -0,09483756 |  |
| 1553243_at   | ITIH5          | -2,551294263 | -2,456406426 | -0,09488784 |  |
| 1555217_at   | UBE2W          | -2,551294263 | -2,456406426 | -0,09488784 |  |
| 1562059_at   | -              | -2,551294263 | -2,456406426 | -0,09488784 |  |
| 1569698_s_at | -              | -2,551294263 | -2,456406426 | -0,09488784 |  |
| 202552_s_at  | CRIM1          | -2,551294263 | -2,456406426 | -0,09488784 |  |
| 205560_at    | PCSK5          | -2,551294263 | -2,456406426 | -0,09488784 |  |
| 206032_at    | DSC3           | -2,551294263 | -2,456406426 | -0,09488784 |  |
| 207802_at    | CRISP3         | -2,551294263 | -2,456406426 | -0,09488784 |  |
| 220793_at    | SAGE1          | -2,551294263 | -2,456406426 | -0,09488784 |  |
| 233876_at    | -              | -2,551294263 | -2,456406426 | -0,09488784 |  |
| 234336_s_at  | TTLL9          | -2,551294263 | -2,456406426 | -0,09488784 |  |
| 236191_at    | -              | -2,551294263 | -2,456406426 | -0,09488784 |  |
| 238845_at    | SLC30A4        | -2,551294263 | -2,456406426 | -0,09488784 |  |
| 241426_at    | CEP44          | -2,551294263 | -2,456406426 | -0,09488784 |  |
| 242446_at    | C6orf163       | -2,551294263 | -2,456406426 | -0,09488784 |  |
| 242528_at    | HOXA-AS2       | -2,551294263 | -2,456406426 | -0,09488784 |  |
| 242871_at    | PAQR5          | -2,551294263 | -2,456406426 | -0,09488784 |  |
| 244799_s_at  | -              | -2,551294263 | -2,456406426 | -0,09488784 |  |

|              |                 |              |              |             |  |
|--------------|-----------------|--------------|--------------|-------------|--|
| 209128_s_at  | SART3           | 3,078700536  | 3,173599504  | -0,09489897 |  |
| 1561599_at   | -               | -0,741668563 | -0,646746079 | -0,09492248 |  |
| 203111_s_at  | PTK2B           | -0,741668563 | -0,646746079 | -0,09492248 |  |
| 222539_at    | CLN6            | -0,741668563 | -0,646746079 | -0,09492248 |  |
| 227717_at    | ARHGEF37        | -0,741668563 | -0,646746079 | -0,09492248 |  |
| 220846_s_at  | -               | 0,384950573  | 0,479907041  | -0,09495647 |  |
| 235047_x_at  | NACC1           | 0,384950573  | 0,479907041  | -0,09495647 |  |
| 222495_at    | TMEM167B        | 3,205636958  | 3,300620584  | -0,09498363 |  |
| 204383_at    | DGCR14 /// TSS  | 1,177702228  | 1,272721751  | -0,09501952 |  |
| 201966_at    | NDUFS2          | 4,257970041  | 4,353041151  | -0,09507111 |  |
| 207954_at    | GATA2           | 0,798390451  | 0,893473268  | -0,09508282 |  |
| 214703_s_at  | MAN2B2          | 0,798390451  | 0,893473268  | -0,09508282 |  |
| 239213_at    | SERPINB1        | 0,798390451  | 0,893473268  | -0,09508282 |  |
| 214578_s_at  | ROCK1           | 1,283332461  | 1,378453643  | -0,09512118 |  |
| 218789_s_at  | C11orf71        | 1,119359127  | 1,214517879  | -0,09515875 |  |
| 235438_at    | -               | 1,119359127  | 1,214517879  | -0,09515875 |  |
| 1569631_at   | NMNAT1          | 0,934330293  | 1,029536893  | -0,0952066  |  |
| 226567_at    | USP14           | 3,848325987  | 3,943660335  | -0,09533435 |  |
| 201950_x_at  | CAPZB           | 4,224629877  | 4,319980141  | -0,09535026 |  |
| 209440_at    | PRPS1           | 4,254020964  | 4,349404898  | -0,09538393 |  |
| 204518_s_at  | PPIC            | 2,472384965  | 2,567790814  | -0,09540585 |  |
| 218558_s_at  | MRPL39          | 4,24665816   | 4,34210478   | -0,09544662 |  |
| 235151_at    | LOC283357       | 0,995078803  | 1,090553537  | -0,09547473 |  |
| 203179_at    | GALT            | 0,641402394  | 0,73688026   | -0,09547787 |  |
| 227862_at    | TRNP1           | 0,641402394  | 0,73688026   | -0,09547787 |  |
| 241957_x_at  | LIN7B           | 0,641402394  | 0,73688026   | -0,09547787 |  |
| 217011_at    | GBX1            | 0,171847695  | 0,26733076   | -0,09548306 |  |
| 220339_s_at  | TPSG1           | 0,171847695  | 0,26733076   | -0,09548306 |  |
| 239848_at    | EIF3M           | 0,171847695  | 0,26733076   | -0,09548306 |  |
| 244381_at    | -               | 0,171847695  | 0,26733076   | -0,09548306 |  |
| 36829_at     | PER1            | 1,198986622  | 1,294497133  | -0,09551051 |  |
| 208857_s_at  | PCMT1           | 4,610581062  | 4,706094468  | -0,09551341 |  |
| 208103_s_at  | ANP32E          | 3,904829675  | 4,00040886   | -0,09557918 |  |
| 225304_s_at  | FUT5 /// NDUFA1 | 5,286482665  | 5,38211766   | -0,095635   |  |
| 216008_s_at  | ARIH2           | 1,638726528  | 1,73441697   | -0,09569044 |  |
| 217862_at    | PIAS1           | 1,422536444  | 1,518263577  | -0,09572713 |  |
| 203339_at    | SLC25A12        | 1,512180019  | 1,60795124   | -0,09577122 |  |
| 211971_s_at  | LRPPRC          | 5,501130258  | 5,596907736  | -0,09577748 |  |
| 209048_s_at  | ZMYND8          | 4,037433122  | 4,133220924  | -0,0957878  |  |
| 216442_x_at  | FN1             | 2,082235068  | 2,17802703   | -0,09579196 |  |
| 213766_x_at  | GNA11           | 3,606946883  | 3,702749166  | -0,09580228 |  |
| 212986_s_at  | TLK2            | 2,261526912  | 2,357351836  | -0,09582492 |  |
| 226175_at    | TTC9C           | 2,261526912  | 2,357351836  | -0,09582492 |  |
| 1556186_s_at | EMC1            | 1,274448124  | 1,370274469  | -0,09582635 |  |
| 201003_x_at  | TMEM189 /// TM  | 1,274448124  | 1,370274469  | -0,09582635 |  |
| 235840_at    | ZKSCAN3         | 1,274448124  | 1,370274469  | -0,09582635 |  |
| 213648_at    | EXOSC7          | 2,194816625  | 2,290658654  | -0,09584203 |  |
| 204246_s_at  | DCTN3           | 4,521870506  | 4,617737065  | -0,09586656 |  |
| 225832_s_at  | DAGLB           | 1,373456798  | 1,469325098  | -0,0958683  |  |
| 1555304_a_at | KCNH5           | -2,504600601 | -2,408705138 | -0,09589546 |  |
| 1560352_at   | LOC100652735 /  | -2,504600601 | -2,408705138 | -0,09589546 |  |
| 1561638_at   | -               | -2,504600601 | -2,408705138 | -0,09589546 |  |
| 1562665_at   | -               | -2,504600601 | -2,408705138 | -0,09589546 |  |
| 1564309_at   | LINC00486       | -2,504600601 | -2,408705138 | -0,09589546 |  |
| 1564601_at   | LINC00221       | -2,504600601 | -2,408705138 | -0,09589546 |  |
| 1569904_x_at | -               | -2,504600601 | -2,408705138 | -0,09589546 |  |

|             |                     |              |              |             |  |
|-------------|---------------------|--------------|--------------|-------------|--|
| 206018_at   | FOXG1               | -2,504600601 | -2,408705138 | -0,09589546 |  |
| 208148_at   | MYH2 /// MYH4       | -2,504600601 | -2,408705138 | -0,09589546 |  |
| 208383_s_at | PCK1                | -2,504600601 | -2,408705138 | -0,09589546 |  |
| 215330_at   | -                   | -2,504600601 | -2,408705138 | -0,09589546 |  |
| 215770_at   | OR7E2P              | -2,504600601 | -2,408705138 | -0,09589546 |  |
| 219993_at   | SOX17               | -2,504600601 | -2,408705138 | -0,09589546 |  |
| 231240_at   | DIO2                | -2,504600601 | -2,408705138 | -0,09589546 |  |
| 232457_at   | LIMCH1              | -2,504600601 | -2,408705138 | -0,09589546 |  |
| 237142_at   | PPARA               | -2,504600601 | -2,408705138 | -0,09589546 |  |
| 237193_s_at | -                   | -2,504600601 | -2,408705138 | -0,09589546 |  |
| 238049_at   | GRAMD3              | -2,504600601 | -2,408705138 | -0,09589546 |  |
| 241033_at   | -                   | -2,504600601 | -2,408705138 | -0,09589546 |  |
| 241078_at   | SLC35E4             | -2,504600601 | -2,408705138 | -0,09589546 |  |
| 241323_at   | -                   | -2,504600601 | -2,408705138 | -0,09589546 |  |
| 244112_x_at | -                   | -2,504600601 | -2,408705138 | -0,09589546 |  |
| 244258_at   | -                   | -2,504600601 | -2,408705138 | -0,09589546 |  |
| 210111_s_at | KLHDC10             | 4,29906933   | 4,394968439  | -0,09589911 |  |
| 229041_s_at | LOC100505746        | 1,46610492   | 1,562009954  | -0,09590503 |  |
| 242143_at   | -                   | 1,46610492   | 1,562009954  | -0,09590503 |  |
| 233851_s_at | TOR3A               | 3,06588531   | 3,161800893  | -0,09591558 |  |
| 216262_s_at | TGIF2               | 2,396622324  | 2,492544876  | -0,09592255 |  |
| 225541_at   | RPL22L1             | 6,492084931  | 6,588088358  | -0,09600343 |  |
| 203153_at   | IFIT1               | 4,98435634   | 5,08037172   | -0,09601538 |  |
| 224930_x_at | RPL7A /// SNOR1     | 7,669403762  | 7,765434536  | -0,09603077 |  |
| 244406_at   | ZNF625 /// ZNF626   | 4,82159731   | 4,917666494  | -0,09606918 |  |
| 226291_at   | ALS2                | 2,134723057  | 2,230931691  | -0,09620863 |  |
| 91682_at    | -                   | 1,837298731  | 1,933510432  | -0,0962117  |  |
| 215698_at   | KDM5A               | 1,631786706  | 1,728030156  | -0,09624345 |  |
| 214404_x_at | SPDEF               | 0,853119696  | 0,949447784  | -0,09632809 |  |
| 205467_at   | CASP10              | 0,984222186  | 1,080561626  | -0,09633944 |  |
| 229412_at   | TAF8                | 0,984222186  | 1,080561626  | -0,09633944 |  |
| 204023_at   | RFC4                | 4,726676749  | 4,823077747  | -0,096401   |  |
| 228930_at   | -                   | 2,292660284  | 2,389070873  | -0,09641059 |  |
| 223194_s_at | SLC22A23            | 2,266015882  | 2,362515214  | -0,09649933 |  |
| 39854_r_at  | PNPLA2              | 2,63825267   | 2,734777402  | -0,09652473 |  |
| 201529_s_at | RPA1                | 4,297425716  | 4,393960186  | -0,09653447 |  |
| 202629_at   | APPBP2              | 2,724770722  | 2,821324225  | -0,0965535  |  |
| 210396_s_at | BOLA2 /// LOC441788 | 4,278110569  | 4,374668281  | -0,09655771 |  |
| 207752_x_at | PRB1                | 0,917308734  | 1,013870809  | -0,09656207 |  |
| 218169_at   | VAC14               | 0,779676066  | 0,876248481  | -0,09657242 |  |
| 201401_s_at | ADRBK1              | 0,627515113  | 0,724100169  | -0,09658506 |  |
| 216506_x_at | MLLT10              | 0,627515113  | 0,724100169  | -0,09658506 |  |
| 236053_at   | LOC100128653        | 0,627515113  | 0,724100169  | -0,09658506 |  |
| 202258_s_at | N4BP2L2             | 4,340094954  | 4,436691079  | -0,09659612 |  |
| 204527_at   | MYO5A               | 0,457392764  | 0,553993624  | -0,09660086 |  |
| 212382_at   | TCF4                | 0,457392764  | 0,553993624  | -0,09660086 |  |
| 214802_at   | EXOC7               | 0,457392764  | 0,553993624  | -0,09660086 |  |
| 244050_at   | PTPLAD2             | 0,457392764  | 0,553993624  | -0,09660086 |  |
| 1563247_at  | -                   | -1,591296941 | -1,494668682 | -0,09662826 |  |
| 1567224_at  | HMGA2               | -1,591296941 | -1,494668682 | -0,09662826 |  |
| 208934_s_at | LGALS8              | -1,591296941 | -1,494668682 | -0,09662826 |  |
| 210058_at   | MAPK13              | -1,591296941 | -1,494668682 | -0,09662826 |  |
| 217255_at   | -                   | -1,591296941 | -1,494668682 | -0,09662826 |  |
| 218186_at   | RAB25               | -1,591296941 | -1,494668682 | -0,09662826 |  |
| 227553_at   | PIK3R5              | -1,591296941 | -1,494668682 | -0,09662826 |  |
| 230173_at   | TRIM4               | -1,591296941 | -1,494668682 | -0,09662826 |  |



|              |                 |              |              |             |  |
|--------------|-----------------|--------------|--------------|-------------|--|
| 230214_at    | MRVI1           | -1,591296941 | -1,494668682 | -0,09662826 |  |
| 230406_at    | -               | -1,591296941 | -1,494668682 | -0,09662826 |  |
| 231247_s_at  | LOC727820       | -1,591296941 | -1,494668682 | -0,09662826 |  |
| 232893_at    | LMBRD2          | -1,591296941 | -1,494668682 | -0,09662826 |  |
| 240885_at    | -               | -1,591296941 | -1,494668682 | -0,09662826 |  |
| 241429_at    | -               | -1,591296941 | -1,494668682 | -0,09662826 |  |
| 224607_s_at  | SRP68           | 3,979845523  | 4,076535251  | -0,09668973 |  |
| 204788_s_at  | PPOX            | 1,314003737  | 1,410714371  | -0,09671063 |  |
| 218271_s_at  | PARL            | 4,114129991  | 4,210848982  | -0,09671899 |  |
| 200616_s_at  | MLEC            | 5,018012431  | 5,114743326  | -0,0967309  |  |
| 229449_at    | -               | 2,182996494  | 2,27978304   | -0,09678655 |  |
| 204771_s_at  | TTF1            | 2,721505869  | 2,81832103   | -0,09681516 |  |
| 205512_s_at  | AIFM1           | 3,373122675  | 3,469974737  | -0,09685206 |  |
| 226968_at    | KIF1B           | 1,81142822   | 1,908311039  | -0,09688282 |  |
| 1557077_a_at | -               | 0,541261317  | 0,638150376  | -0,09688906 |  |
| 201982_s_at  | PAPPA           | 0,541261317  | 0,638150376  | -0,09688906 |  |
| 222672_at    | LYRM4           | 0,541261317  | 0,638150376  | -0,09688906 |  |
| 1552286_at   | ATP6V1E2 /// FL | 0,359971644  | 0,456918297  | -0,09694665 |  |
| 226032_at    | CASP2           | 4,964815103  | 5,06176326   | -0,09694816 |  |
| 1552586_at   | TRPV3           | -1,047650486 | -0,950686014 | -0,09696447 |  |
| 1559170_at   | -               | -1,047650486 | -0,950686014 | -0,09696447 |  |
| 203638_s_at  | FGFR2           | -1,047650486 | -0,950686014 | -0,09696447 |  |
| 208006_at    | FOXI1           | -1,047650486 | -0,950686014 | -0,09696447 |  |
| 213252_at    | SH3PXD2A        | -1,047650486 | -0,950686014 | -0,09696447 |  |
| 218015_s_at  | WRNIP1          | -1,047650486 | -0,950686014 | -0,09696447 |  |
| 220062_s_at  | MAGEC2          | -1,047650486 | -0,950686014 | -0,09696447 |  |
| 220745_at    | IL19            | -1,047650486 | -0,950686014 | -0,09696447 |  |
| 225061_at    | DNAJA4          | -1,047650486 | -0,950686014 | -0,09696447 |  |
| 236152_at    | PAGE5           | -1,047650486 | -0,950686014 | -0,09696447 |  |
| 243048_at    | CECR7           | -1,047650486 | -0,950686014 | -0,09696447 |  |
| 91920_at     | BCAN            | 1,285545022  | 1,382525907  | -0,09698088 |  |
| 216226_at    | TAF4B           | 0,152582607  | 0,249604176  | -0,09702157 |  |
| 233357_at    | TRIM67          | 0,152582607  | 0,249604176  | -0,09702157 |  |
| 237331_s_at  | MAPT-AS1        | 0,152582607  | 0,249604176  | -0,09702157 |  |
| 238001_at    | KCTD6           | 0,152582607  | 0,249604176  | -0,09702157 |  |
| 205372_at    | PLAG1           | 1,699726954  | 1,796776588  | -0,09704963 |  |
| 213099_at    | ANGEL1          | 2,580856819  | 2,677924589  | -0,09706777 |  |
| 1563076_x_at | -               | -0,089689931 | 0,007421914  | -0,09711184 |  |
| 204260_at    | CHGB            | -0,089689931 | 0,007421914  | -0,09711184 |  |
| 227925_at    | FLJ39051        | -0,089689931 | 0,007421914  | -0,09711184 |  |
| 243331_at    | -               | -0,089689931 | 0,007421914  | -0,09711184 |  |
| 201543_s_at  | SAR1A           | 4,27755489   | 4,374668281  | -0,09711339 |  |
| 225943_at    | NLN             | 1,973904239  | 2,071071048  | -0,09716681 |  |
| 218041_x_at  | SLC38A2         | 7,112073188  | 7,209315441  | -0,09724225 |  |
| 201292_at    | TOP2A           | 4,999598816  | 5,096885575  | -0,09728676 |  |
| 1560579_s_at | LOC100506392    | 2,987866617  | 3,08516499   | -0,09729837 |  |
| 225999_at    | RIMKLB          | 0,255492549  | 0,352836757  | -0,09734421 |  |
| 241927_x_at  | -               | 0,255492549  | 0,352836757  | -0,09734421 |  |
| 228562_at    | ZBTB10          | 1,40228911   | 1,499637023  | -0,09734791 |  |
| 208694_at    | PRKDC           | 4,923500131  | 5,02087432   | -0,09737419 |  |
| 218548_x_at  | TEX264          | 1,534677255  | 1,632095957  | -0,0974187  |  |
| 228639_at    | -               | 1,534677255  | 1,632095957  | -0,0974187  |  |
| 218998_at    | FAM206A         | 2,922548342  | 3,019999252  | -0,09745091 |  |
| 1553365_at   | DEPDC4          | -2,43257096  | -2,335104118 | -0,09746684 |  |
| 1553850_at   | C21orf88        | -2,43257096  | -2,335104118 | -0,09746684 |  |
| 1556153_s_at | -               | -2,43257096  | -2,335104118 | -0,09746684 |  |

|              |              |              |              |             |  |
|--------------|--------------|--------------|--------------|-------------|--|
| 1559151_at   | -            | -2,43257096  | -2,335104118 | -0,09746684 |  |
| 1559641_at   | -            | -2,43257096  | -2,335104118 | -0,09746684 |  |
| 1566040_at   | -            | -2,43257096  | -2,335104118 | -0,09746684 |  |
| 1566426_at   | -            | -2,43257096  | -2,335104118 | -0,09746684 |  |
| 1569436_at   | LOC400128    | -2,43257096  | -2,335104118 | -0,09746684 |  |
| 1569490_at   | FNDC3B       | -2,43257096  | -2,335104118 | -0,09746684 |  |
| 1570337_at   | FIGLA        | -2,43257096  | -2,335104118 | -0,09746684 |  |
| 204457_s_at  | GAS1         | -2,43257096  | -2,335104118 | -0,09746684 |  |
| 207080_s_at  | PYY          | -2,43257096  | -2,335104118 | -0,09746684 |  |
| 212950_at    | GPR116       | -2,43257096  | -2,335104118 | -0,09746684 |  |
| 213423_x_at  | TUSC3        | -2,43257096  | -2,335104118 | -0,09746684 |  |
| 213974_at    | ADAMTSL3     | -2,43257096  | -2,335104118 | -0,09746684 |  |
| 214038_at    | CCL8         | -2,43257096  | -2,335104118 | -0,09746684 |  |
| 214640_at    | UNC93A       | -2,43257096  | -2,335104118 | -0,09746684 |  |
| 214897_at    | -            | -2,43257096  | -2,335104118 | -0,09746684 |  |
| 215632_at    | NEUROG2      | -2,43257096  | -2,335104118 | -0,09746684 |  |
| 221958_s_at  | WLS          | -2,43257096  | -2,335104118 | -0,09746684 |  |
| 236697_at    | -            | -2,43257096  | -2,335104118 | -0,09746684 |  |
| 237104_at    | -            | -2,43257096  | -2,335104118 | -0,09746684 |  |
| 239032_at    | -            | -2,43257096  | -2,335104118 | -0,09746684 |  |
| 243660_at    | -            | -2,43257096  | -2,335104118 | -0,09746684 |  |
| 225718_at    | KIAA1715     | 1,446464021  | 1,543943227  | -0,09747921 |  |
| 205238_at    | TRMT2B       | 0,03125738   | 0,128747141  | -0,09748976 |  |
| 205866_at    | FCN3         | 0,03125738   | 0,128747141  | -0,09748976 |  |
| 208368_s_at  | BRCA2        | 0,03125738   | 0,128747141  | -0,09748976 |  |
| 213527_s_at  | ZNF688       | 0,03125738   | 0,128747141  | -0,09748976 |  |
| 214436_at    | FBXL2        | 0,03125738   | 0,128747141  | -0,09748976 |  |
| 231443_at    | LOC100505644 | 0,03125738   | 0,128747141  | -0,09748976 |  |
| 210585_s_at  | TNPO2        | 1,352503698  | 1,450051551  | -0,09754785 |  |
| 1569871_at   | LMF1         | 2,030406107  | 2,127967638  | -0,09756153 |  |
| 209438_at    | PHKA2        | 0,767063567  | 0,864649967  | -0,0975864  |  |
| 227978_s_at  | ZADH2        | 0,767063567  | 0,864649967  | -0,0975864  |  |
| 219028_at    | HIPK2        | 1,251994932  | 1,349621332  | -0,0976264  |  |
| 200863_s_at  | RAB11A       | 5,649158686  | 5,746789322  | -0,09763064 |  |
| 1556728_at   | -            | -0,234278768 | -0,136643983 | -0,09763478 |  |
| 1557145_at   | STK38        | -0,234278768 | -0,136643983 | -0,09763478 |  |
| 1557148_at   | HM13         | -0,234278768 | -0,136643983 | -0,09763478 |  |
| 1564544_x_at | -            | -0,234278768 | -0,136643983 | -0,09763478 |  |
| 207904_s_at  | LNPEP        | -0,234278768 | -0,136643983 | -0,09763478 |  |
| 216208_s_at  | ATF6B        | -0,234278768 | -0,136643983 | -0,09763478 |  |
| 230869_at    | FAM155A      | -0,234278768 | -0,136643983 | -0,09763478 |  |
| 234663_at    | -            | -0,234278768 | -0,136643983 | -0,09763478 |  |
| 241877_at    | -            | -0,234278768 | -0,136643983 | -0,09763478 |  |
| 1552405_at   | NLRP5        | -1,639579028 | -1,541908042 | -0,09767099 |  |
| 1553425_at   | WDR65        | -1,639579028 | -1,541908042 | -0,09767099 |  |
| 1557620_a_at | CCDC38       | -1,639579028 | -1,541908042 | -0,09767099 |  |
| 1561197_at   | LOC442028    | -1,639579028 | -1,541908042 | -0,09767099 |  |
| 1561712_at   | -            | -1,639579028 | -1,541908042 | -0,09767099 |  |
| 1563468_at   | -            | -1,639579028 | -1,541908042 | -0,09767099 |  |
| 1565080_at   | SRC          | -1,639579028 | -1,541908042 | -0,09767099 |  |
| 1565866_a_at | ZBED6        | -1,639579028 | -1,541908042 | -0,09767099 |  |
| 205689_at    | PCNXL2       | -1,639579028 | -1,541908042 | -0,09767099 |  |
| 206804_at    | CD3G         | -1,639579028 | -1,541908042 | -0,09767099 |  |
| 208429_x_at  | HNF4A        | -1,639579028 | -1,541908042 | -0,09767099 |  |
| 208935_s_at  | LGALS8       | -1,639579028 | -1,541908042 | -0,09767099 |  |
| 214400_at    | INSL3        | -1,639579028 | -1,541908042 | -0,09767099 |  |

|              |                 |              |              |             |  |
|--------------|-----------------|--------------|--------------|-------------|--|
| 214498_at    | ASIP            | -1,639579028 | -1,541908042 | -0,09767099 |  |
| 215126_at    | -               | -1,639579028 | -1,541908042 | -0,09767099 |  |
| 215345_x_at  | -               | -1,639579028 | -1,541908042 | -0,09767099 |  |
| 217590_s_at  | TRPA1           | -1,639579028 | -1,541908042 | -0,09767099 |  |
| 235105_at    | -               | -1,639579028 | -1,541908042 | -0,09767099 |  |
| 236479_at    | -               | -1,639579028 | -1,541908042 | -0,09767099 |  |
| 236558_at    | -               | -1,639579028 | -1,541908042 | -0,09767099 |  |
| 236848_s_at  | TEX13A          | -1,639579028 | -1,541908042 | -0,09767099 |  |
| 237796_at    | -               | -1,639579028 | -1,541908042 | -0,09767099 |  |
| 238403_at    | -               | -1,639579028 | -1,541908042 | -0,09767099 |  |
| 239023_at    | -               | -1,639579028 | -1,541908042 | -0,09767099 |  |
| 242945_at    | FAM20A          | -1,639579028 | -1,541908042 | -0,09767099 |  |
| 243105_at    | -               | -1,639579028 | -1,541908042 | -0,09767099 |  |
| 243898_at    | -               | -1,639579028 | -1,541908042 | -0,09767099 |  |
| 202985_s_at  | BAG5            | 4,482391326  | 4,580112044  | -0,09772072 |  |
| 223060_at    | C14orf119       | 5,181091454  | 5,278850409  | -0,09775896 |  |
| 222984_at    | PAIP2           | 5,146512795  | 5,244303275  | -0,09779048 |  |
| 228228_at    | DACT3           | 2,669932407  | 2,767843855  | -0,09791145 |  |
| 203595_s_at  | IFIT5           | 3,248232277  | 3,346162854  | -0,09793058 |  |
| 209662_at    | CETN3           | 3,940369794  | 4,038328982  | -0,09795919 |  |
| 200069_at    | SART3           | 3,03990821   | 3,137910193  | -0,09800198 |  |
| 47553_at     | DFNB31          | -0,898923562 | -0,800916291 | -0,09800727 |  |
| 218317_x_at  | SLX1A /// SLX1B | 2,993291442  | 3,091398163  | -0,09810672 |  |
| 1556102_x_at | LOC389906       | 1,795990708  | 1,894118818  | -0,09812811 |  |
| 200593_s_at  | HNRNPU          | 4,937286399  | 5,035495453  | -0,09820905 |  |
| 201631_s_at  | IER3            | 1,722769813  | 1,820984782  | -0,09821497 |  |
| 215195_at    | PRKCA           | 1,481627361  | 1,579853228  | -0,09822587 |  |
| 1552360_a_at | TIRAP           | -2,384869671 | -2,286583451 | -0,09828622 |  |
| 1557354_at   | SOS1            | -2,384869671 | -2,286583451 | -0,09828622 |  |
| 1559940_s_at | -               | -2,384869671 | -2,286583451 | -0,09828622 |  |
| 1560164_at   | -               | -2,384869671 | -2,286583451 | -0,09828622 |  |
| 1560665_at   | SCPEP1          | -2,384869671 | -2,286583451 | -0,09828622 |  |
| 1560893_at   | -               | -2,384869671 | -2,286583451 | -0,09828622 |  |
| 1562827_at   | DIO2-AS1        | -2,384869671 | -2,286583451 | -0,09828622 |  |
| 1566191_at   | SUZ12           | -2,384869671 | -2,286583451 | -0,09828622 |  |
| 1566468_at   | -               | -2,384869671 | -2,286583451 | -0,09828622 |  |
| 204939_s_at  | PLN             | -2,384869671 | -2,286583451 | -0,09828622 |  |
| 206392_s_at  | RARRES1         | -2,384869671 | -2,286583451 | -0,09828622 |  |
| 210055_at    | TSHR            | -2,384869671 | -2,286583451 | -0,09828622 |  |
| 215197_at    | -               | -2,384869671 | -2,286583451 | -0,09828622 |  |
| 230472_at    | IRX1            | -2,384869671 | -2,286583451 | -0,09828622 |  |
| 234616_at    | -               | -2,384869671 | -2,286583451 | -0,09828622 |  |
| 241461_at    | -               | -2,384869671 | -2,286583451 | -0,09828622 |  |
| 224446_at    | LLPH /// LOC100 | 4,242108456  | 4,340535652  | -0,0984272  |  |
| 212601_at    | ZZEF1           | 1,926486359  | 2,024923328  | -0,09843697 |  |
| 212752_at    | CLASP1          | 2,774453351  | 2,87289275   | -0,0984394  |  |
| 201345_s_at  | UBE2D2          | 4,568952594  | 4,667398257  | -0,09844566 |  |
| 223416_at    | SF3B14          | 6,186537019  | 6,285012745  | -0,09847573 |  |
| 201459_at    | RUVBL2          | 5,62380682   | 5,7222967    | -0,09848988 |  |
| 221520_s_at  | CDCA8           | 3,868391882  | 3,966899535  | -0,09850765 |  |
| 218750_at    | TAF1D           | 2,825526235  | 2,924079008  | -0,09855277 |  |
| 205367_at    | SH2B2           | 0,95671774   | 1,055274826  | -0,09855709 |  |
| 231493_at    | -               | 0,95671774   | 1,055274826  | -0,09855709 |  |
| 244053_at    | -               | 0,95671774   | 1,055274826  | -0,09855709 |  |
| 44822_s_at   | MIER2           | 1,789769151  | 1,888402606  | -0,09863345 |  |
| 226398_s_at  | FRA10AC1        | 3,651373876  | 3,75000829   | -0,09863441 |  |

|              |           |              |              |             |  |
|--------------|-----------|--------------|--------------|-------------|--|
| 201924_at    | AFF1      | 2,017152618  | 2,115788273  | -0,09863565 |  |
| 219571_s_at  | ZNF12     | 2,132266459  | 2,230931691  | -0,09866523 |  |
| 215726_s_at  | CYB5A     | 1,560488174  | 1,659204017  | -0,09871584 |  |
| 227951_s_at  | FAM98C    | 1,954567604  | 2,053299695  | -0,09873209 |  |
| 209514_s_at  | RAB27A    | 3,325531666  | 3,424287521  | -0,09875586 |  |
| 1554691_a_at | PACSIN2   | 2,450859799  | 2,549796788  | -0,09893699 |  |
| 207128_s_at  | ZNF223    | 0,334552598  | 0,433557298  | -0,0990047  |  |
| 224512_s_at  | LSMD1     | 3,749205801  | 3,848241888  | -0,09903609 |  |
| 224822_at    | DLC1      | 3,207971844  | 3,307062282  | -0,09909044 |  |
| 213577_at    | SQLE      | 3,62627949   | 3,725370335  | -0,09909085 |  |
| 219848_s_at  | ZNF432    | 2,535098095  | 2,634191677  | -0,09909358 |  |
| 1555340_x_at | RAP1A     | -1,71423189  | -1,615132408 | -0,09909948 |  |
| 1562116_at   | -         | -1,71423189  | -1,615132408 | -0,09909948 |  |
| 1568779_a_at | ECM2      | -1,71423189  | -1,615132408 | -0,09909948 |  |
| 214379_at    | HNRPD1    | -1,71423189  | -1,615132408 | -0,09909948 |  |
| 215393_s_at  | COBLL1    | -1,71423189  | -1,615132408 | -0,09909948 |  |
| 220654_at    | PPY2      | -1,71423189  | -1,615132408 | -0,09909948 |  |
| 224220_x_at  | TRPC4     | -1,71423189  | -1,615132408 | -0,09909948 |  |
| 228701_at    | C8orf46   | -1,71423189  | -1,615132408 | -0,09909948 |  |
| 230507_at    | ATXN1     | -1,71423189  | -1,615132408 | -0,09909948 |  |
| 238770_at    | KIAA1456  | -1,71423189  | -1,615132408 | -0,09909948 |  |
| 241950_at    | WWC1      | -1,71423189  | -1,615132408 | -0,09909948 |  |
| 33304_at     | ISG20     | 2,098686347  | 2,197805467  | -0,09911912 |  |
| 207949_s_at  | ICA1      | 0,747935635  | 0,847075464  | -0,09913983 |  |
| 235552_at    | METTL14   | 2,380152406  | 2,479296438  | -0,09914403 |  |
| 203458_at    | SPR       | 3,025418883  | 3,124599694  | -0,09918081 |  |
| 222975_s_at  | CSDE1     | 5,301593085  | 5,400809039  | -0,09921595 |  |
| 200960_x_at  | CLTA      | 6,028325745  | 6,127572504  | -0,09924676 |  |
| 202432_at    | PPP3CB    | 3,413135307  | 3,512402411  | -0,0992671  |  |
| 217485_x_at  | PMS2P1    | 3,082523011  | 3,181801492  | -0,09927848 |  |
| 217838_s_at  | EVL       | 3,500492568  | 3,599822964  | -0,0993304  |  |
| 213523_at    | CCNE1     | 5,330275981  | 5,429630239  | -0,09935426 |  |
| 213872_at    | -         | 5,831706309  | 5,931061289  | -0,09935498 |  |
| 1562698_x_at | LOC339988 | 0,123193849  | 0,222599095  | -0,09940525 |  |
| 216849_at    | -         | 0,123193849  | 0,222599095  | -0,09940525 |  |
| 236436_at    | SLC25A45  | 0,123193849  | 0,222599095  | -0,09940525 |  |
| 214016_s_at  | SFPQ      | 3,399920684  | 3,499335901  | -0,09941522 |  |
| 211630_s_at  | GSS       | 3,477451563  | 3,576905405  | -0,09945384 |  |
| 41644_at     | SASH1     | -0,055603165 | 0,043873926  | -0,09947709 |  |
| 222579_at    | UBA5      | 2,688444421  | 2,787940144  | -0,09949572 |  |
| 1552848_a_at | PTCHD1    | -2,311268652 | -2,211750327 | -0,09951832 |  |
| 1553322_s_at | TEAD1     | -2,311268652 | -2,211750327 | -0,09951832 |  |
| 1561767_at   | -         | -2,311268652 | -2,211750327 | -0,09951832 |  |
| 1564840_at   | -         | -2,311268652 | -2,211750327 | -0,09951832 |  |
| 1565999_at   | LOC286299 | -2,311268652 | -2,211750327 | -0,09951832 |  |
| 1567612_at   | -         | -2,311268652 | -2,211750327 | -0,09951832 |  |
| 202035_s_at  | SFRP1     | -2,311268652 | -2,211750327 | -0,09951832 |  |
| 207635_s_at  | KCNH1     | -2,311268652 | -2,211750327 | -0,09951832 |  |
| 209615_s_at  | PAK1      | -2,311268652 | -2,211750327 | -0,09951832 |  |
| 210159_s_at  | TRIM31    | -2,311268652 | -2,211750327 | -0,09951832 |  |
| 211586_s_at  | ATP2B2    | -2,311268652 | -2,211750327 | -0,09951832 |  |
| 214222_at    | DNAH7     | -2,311268652 | -2,211750327 | -0,09951832 |  |
| 220304_s_at  | CNGB3     | -2,311268652 | -2,211750327 | -0,09951832 |  |
| 222967_at    | SLC5A7    | -2,311268652 | -2,211750327 | -0,09951832 |  |
| 229565_x_at  | TBX3      | -2,311268652 | -2,211750327 | -0,09951832 |  |
| 231684_at    | ANGPTL3   | -2,311268652 | -2,211750327 | -0,09951832 |  |

|              |                  |              |              |             |  |
|--------------|------------------|--------------|--------------|-------------|--|
| 232745_x_at  | SPEF2            | -2,311268652 | -2,211750327 | -0,09951832 |  |
| 233548_at    | -                | -2,311268652 | -2,211750327 | -0,09951832 |  |
| 234224_at    | -                | -2,311268652 | -2,211750327 | -0,09951832 |  |
| 236063_at    | -                | -2,311268652 | -2,211750327 | -0,09951832 |  |
| 240685_at    | LOC100505545     | -2,311268652 | -2,211750327 | -0,09951832 |  |
| 241394_at    | -                | -2,311268652 | -2,211750327 | -0,09951832 |  |
| 243140_at    | ACTA2            | -2,311268652 | -2,211750327 | -0,09951832 |  |
| 244359_s_at  | -                | -2,311268652 | -2,211750327 | -0,09951832 |  |
| 206499_s_at  | RCC1             | 3,176127502  | 3,275657468  | -0,09952997 |  |
| 213333_at    | MDH2             | 2,420979937  | 2,520531219  | -0,09955128 |  |
| 225882_at    | SLC35B4          | 2,035673598  | 2,135226207  | -0,09955261 |  |
| 216308_x_at  | GRHPR            | 3,214953914  | 3,314541423  | -0,09958751 |  |
| 1555145_at   | CCSAP            | -0,59053611  | -0,490927335 | -0,09960878 |  |
| 1555206_at   | LOC100287210     | -0,59053611  | -0,490927335 | -0,09960878 |  |
| 1556872_s_at | IQSEC3 /// LOC1  | -0,59053611  | -0,490927335 | -0,09960878 |  |
| 211602_s_at  | TRPC1            | -0,59053611  | -0,490927335 | -0,09960878 |  |
| 219194_at    | SEMA4G           | -0,59053611  | -0,490927335 | -0,09960878 |  |
| 219718_at    | FGGY             | -0,59053611  | -0,490927335 | -0,09960878 |  |
| 231039_at    | NAA30            | -0,59053611  | -0,490927335 | -0,09960878 |  |
| 231950_at    | LOC653501 /// Z1 | -0,59053611  | -0,490927335 | -0,09960878 |  |
| 235909_at    | PCBP1-AS1        | -0,59053611  | -0,490927335 | -0,09960878 |  |
| 239857_at    | -                | -0,59053611  | -0,490927335 | -0,09960878 |  |
| 38521_at     | CD22             | 0,004677556  | 0,104307659  | -0,0996301  |  |
| 217755_at    | HN1              | 4,667677441  | 4,767329587  | -0,09965215 |  |
| 218139_s_at  | AP5M1            | 4,019599615  | 4,119256941  | -0,09965733 |  |
| 1559956_at   | SYT7             | -3,054236653 | -2,954576755 | -0,0996599  |  |
| 1560899_at   | -                | -3,054236653 | -2,954576755 | -0,0996599  |  |
| 1565578_at   | -                | -3,054236653 | -2,954576755 | -0,0996599  |  |
| 1569262_x_at | UBE3D            | -3,054236653 | -2,954576755 | -0,0996599  |  |
| 1569571_at   | LIPJ             | -3,054236653 | -2,954576755 | -0,0996599  |  |
| 1569768_at   | -                | -3,054236653 | -2,954576755 | -0,0996599  |  |
| 207465_at    | LOC100127886     | -3,054236653 | -2,954576755 | -0,0996599  |  |
| 219908_at    | DKK2             | -3,054236653 | -2,954576755 | -0,0996599  |  |
| 228241_at    | AGR3             | -3,054236653 | -2,954576755 | -0,0996599  |  |
| 229201_at    | -                | -3,054236653 | -2,954576755 | -0,0996599  |  |
| 229944_at    | OPRK1            | -3,054236653 | -2,954576755 | -0,0996599  |  |
| 233280_at    | -                | -3,054236653 | -2,954576755 | -0,0996599  |  |
| 234472_at    | GALNT13          | -3,054236653 | -2,954576755 | -0,0996599  |  |
| 236548_at    | GIPC2            | -3,054236653 | -2,954576755 | -0,0996599  |  |
| 238332_at    | ANKRD29          | -3,054236653 | -2,954576755 | -0,0996599  |  |
| 240724_at    | -                | -3,054236653 | -2,954576755 | -0,0996599  |  |
| 240770_at    | TMEM171          | -3,054236653 | -2,954576755 | -0,0996599  |  |
| 243882_at    | -                | -3,054236653 | -2,954576755 | -0,0996599  |  |
| 210990_s_at  | LAMA4            | -0,259832361 | -0,160136748 | -0,09969561 |  |
| 215420_at    | IHH              | -0,259832361 | -0,160136748 | -0,09969561 |  |
| 220152_at    | C10orf95         | -0,259832361 | -0,160136748 | -0,09969561 |  |
| 228394_at    | STK10            | -0,259832361 | -0,160136748 | -0,09969561 |  |
| 229180_at    | WWC1             | -0,259832361 | -0,160136748 | -0,09969561 |  |
| 239464_at    | -                | -0,259832361 | -0,160136748 | -0,09969561 |  |
| 240367_at    | -                | -0,259832361 | -0,160136748 | -0,09969561 |  |
| 226118_at    | CENPO            | 2,277177578  | 2,376875125  | -0,09969755 |  |
| 204839_at    | POP5             | 4,898781575  | 4,998495147  | -0,09971357 |  |
| 217491_x_at  | COX7C            | 6,418259384  | 6,518033863  | -0,09977448 |  |
| 217892_s_at  | LIMA1            | 2,462640593  | 2,562416132  | -0,09977554 |  |
| 221039_s_at  | ASAP1            | 3,852809256  | 3,952590169  | -0,09978091 |  |
| 223205_s_at  | L3MBTL2          | 2,348755185  | 2,448549499  | -0,09979431 |  |

|              |                |              |              |             |  |
|--------------|----------------|--------------|--------------|-------------|--|
| 1556321_a_at | -              | 0,417596971  | 0,51742585   | -0,09982888 |  |
| 211821_x_at  | GYPA           | 0,417596971  | 0,51742585   | -0,09982888 |  |
| 1555395_at   | AKAP12         | -1,763254337 | -1,663414495 | -0,09983984 |  |
| 1558561_at   | HM13           | -1,763254337 | -1,663414495 | -0,09983984 |  |
| 1560069_at   | PLEKHM3        | -1,763254337 | -1,663414495 | -0,09983984 |  |
| 1569727_at   | -              | -1,763254337 | -1,663414495 | -0,09983984 |  |
| 206210_s_at  | CETP           | -1,763254337 | -1,663414495 | -0,09983984 |  |
| 207885_at    | S100G          | -1,763254337 | -1,663414495 | -0,09983984 |  |
| 208537_at    | S1PR2          | -1,763254337 | -1,663414495 | -0,09983984 |  |
| 213675_at    | PARVA          | -1,763254337 | -1,663414495 | -0,09983984 |  |
| 219714_s_at  | CACNA2D3       | -1,763254337 | -1,663414495 | -0,09983984 |  |
| 228748_at    | CD59           | -1,763254337 | -1,663414495 | -0,09983984 |  |
| 231284_at    | LOC100506406   | -1,763254337 | -1,663414495 | -0,09983984 |  |
| 235764_at    | PRDM5          | -1,763254337 | -1,663414495 | -0,09983984 |  |
| 236822_at    | LOC100507288   | -1,763254337 | -1,663414495 | -0,09983984 |  |
| 237073_at    | -              | -1,763254337 | -1,663414495 | -0,09983984 |  |
| 237380_at    | -              | -1,763254337 | -1,663414495 | -0,09983984 |  |
| 243503_at    | -              | -1,763254337 | -1,663414495 | -0,09983984 |  |
| 232349_x_at  | DCAF6          | 3,262904562  | 3,362748434  | -0,09984387 |  |
| 208684_at    | COPA           | 3,597182555  | 3,697038015  | -0,09985546 |  |
| 1558426_x_at | ORAI2          | 2,525769574  | 2,625627364  | -0,09985779 |  |
| 222666_s_at  | RCL1           | 2,416948786  | 2,516830926  | -0,09988214 |  |
| 236155_at    | ZCCHC6         | 0,503742507  | 0,603679647  | -0,09993714 |  |
| 211251_x_at  | NFYC           | 2,171078719  | 2,271023131  | -0,09994441 |  |
| 221589_s_at  | ALDH6A1        | 1,369290453  | 1,469325098  | -0,10003465 |  |
| 1554007_at   | -              | -2,262747984 | -2,162639771 | -0,10010821 |  |
| 1562173_a_at | LINC00555      | -2,262747984 | -2,162639771 | -0,10010821 |  |
| 1562989_at   | -              | -2,262747984 | -2,162639771 | -0,10010821 |  |
| 1563044_at   | -              | -2,262747984 | -2,162639771 | -0,10010821 |  |
| 1568689_at   | LOC100631378   | -2,262747984 | -2,162639771 | -0,10010821 |  |
| 203681_at    | IVD            | -2,262747984 | -2,162639771 | -0,10010821 |  |
| 205515_at    | PRSS12         | -2,262747984 | -2,162639771 | -0,10010821 |  |
| 210402_at    | KCNJ1          | -2,262747984 | -2,162639771 | -0,10010821 |  |
| 211039_at    | CHRNA1         | -2,262747984 | -2,162639771 | -0,10010821 |  |
| 211626_x_at  | ERG            | -2,262747984 | -2,162639771 | -0,10010821 |  |
| 213429_at    | BICC1          | -2,262747984 | -2,162639771 | -0,10010821 |  |
| 217237_at    | -              | -2,262747984 | -2,162639771 | -0,10010821 |  |
| 217281_x_at  | IGH@ /// IGHA1 | -2,262747984 | -2,162639771 | -0,10010821 |  |
| 221159_at    | -              | -2,262747984 | -2,162639771 | -0,10010821 |  |
| 231417_at    | -              | -2,262747984 | -2,162639771 | -0,10010821 |  |
| 232537_x_at  | MARK3          | -2,262747984 | -2,162639771 | -0,10010821 |  |
| 232803_at    | -              | -2,262747984 | -2,162639771 | -0,10010821 |  |
| 233153_at    | -              | -2,262747984 | -2,162639771 | -0,10010821 |  |
| 237275_at    | LINC00458      | -2,262747984 | -2,162639771 | -0,10010821 |  |
| 237634_at    | -              | -2,262747984 | -2,162639771 | -0,10010821 |  |
| 240193_at    | -              | -2,262747984 | -2,162639771 | -0,10010821 |  |
| 241197_at    | -              | -2,262747984 | -2,162639771 | -0,10010821 |  |
| 242064_at    | SDK2           | -2,262747984 | -2,162639771 | -0,10010821 |  |
| 243877_at    | -              | -2,262747984 | -2,162639771 | -0,10010821 |  |
| 209776_s_at  | SLC19A1        | 1,114389003  | 1,214517879  | -0,10012888 |  |
| 205176_s_at  | ITGB3BP        | 3,735513868  | 3,835672678  | -0,10015881 |  |
| 218977_s_at  | TRNAU1AP       | 0,735041319  | 0,835239052  | -0,10019773 |  |
| 208704_x_at  | APLP2          | 3,904829675  | 4,005038666  | -0,10020899 |  |
| 202668_at    | EFNB2          | 3,389672581  | 3,489929688  | -0,10025711 |  |
| 221495_s_at  | TCF25          | 3,389672581  | 3,489929688  | -0,10025711 |  |
| 204203_at    | CEBPG          | 3,232262672  | 3,332545245  | -0,10028257 |  |

|              |         |              |              |             |  |
|--------------|---------|--------------|--------------|-------------|--|
| 227270_at    | FAM200B | 1,269985355  | 1,370274469  | -0,10028911 |  |
| 57715_at     | CALHM2  | 0,581435402  | 0,681765245  | -0,10032984 |  |
| 205315_s_at  | SNTB2   | 1,318332599  | 1,418668082  | -0,10033548 |  |
| 39549_at     | NPAS2   | -2,887413183 | -2,78705849  | -0,10035469 |  |
| 208746_x_at  | ATP5L   | 6,735269441  | 6,835634048  | -0,10036461 |  |
| 203466_at    | MPV17   | 2,580856819  | 2,681234383  | -0,10037756 |  |
| 204099_at    | SMARCD3 | -0,423248115 | -0,322870281 | -0,10037783 |  |
| 219606_at    | PHF20L1 | -0,423248115 | -0,322870281 | -0,10037783 |  |
| 228685_at    | IL17RA  | -0,423248115 | -0,322870281 | -0,10037783 |  |
| 240013_at    | -       | -0,423248115 | -0,322870281 | -0,10037783 |  |
| 212663_at    | FKBP15  | 2,410880861  | 2,511262629  | -0,10038177 |  |
| 213689_x_at  | FAM69A  | 0,317354302  | 0,417770464  | -0,10041616 |  |
| 223448_x_at  | MRPS22  | 4,106641205  | 4,207122602  | -0,1004814  |  |
| 212566_at    | MAP4    | 3,123915073  | 3,22439681   | -0,10048174 |  |
| 218616_at    | INTS12  | 3,123915073  | 3,22439681   | -0,10048174 |  |
| 222750_s_at  | SRD5A3  | 2,713311265  | 2,813804482  | -0,10049322 |  |
| 227213_at    | ADAT2   | 1,496984567  | 1,59747851   | -0,10049394 |  |
| 205205_at    | RELB    | 1,05337236   | 1,153866761  | -0,1004944  |  |
| 237768_x_at  | -       | 1,05337236   | 1,153866761  | -0,1004944  |  |
| 209777_s_at  | SLC19A1 | 3,177319542  | 3,277845403  | -0,10052586 |  |
| 219939_s_at  | CSDE1   | 5,774272928  | 5,874806316  | -0,10053339 |  |
| 235783_at    | MRT04   | 1,932146506  | 2,032717854  | -0,10057135 |  |
| 203719_at    | ERCC1   | 3,149650293  | 3,250254796  | -0,1006045  |  |
| 213794_s_at  | NGDN    | 4,891899985  | 4,992512677  | -0,10061269 |  |
| 203492_x_at  | CEP57   | 3,350052045  | 3,450709925  | -0,10065788 |  |
| 65472_at     | C2orf68 | -0,706943342 | -0,60626428  | -0,10067906 |  |
| 224415_s_at  | HINT2   | 3,121439986  | 3,222126232  | -0,10068625 |  |
| 210389_x_at  | TUBD1   | 2,107467633  | 2,208167653  | -0,10070002 |  |
| 212782_x_at  | POLR2J  | 5,03980296   | 5,140521187  | -0,10071823 |  |
| 228771_at    | ADRBK2  | 1,799091453  | 1,899812471  | -0,10072102 |  |
| 219863_at    | HERC5   | 3,451082821  | 3,551810897  | -0,10072808 |  |
| 1554176_a_at | C3orf33 | -1,838812296 | -1,738067356 | -0,10074494 |  |
| 1556828_at   | -       | -1,838812296 | -1,738067356 | -0,10074494 |  |
| 1560070_at   | -       | -1,838812296 | -1,738067356 | -0,10074494 |  |
| 205534_at    | PCDH7   | -1,838812296 | -1,738067356 | -0,10074494 |  |
| 206606_at    | LIPC    | -1,838812296 | -1,738067356 | -0,10074494 |  |
| 207117_at    | ZNF117  | -1,838812296 | -1,738067356 | -0,10074494 |  |
| 211545_at    | GHRHR   | -1,838812296 | -1,738067356 | -0,10074494 |  |
| 212327_at    | LIMCH1  | -1,838812296 | -1,738067356 | -0,10074494 |  |
| 215960_at    | SLC5A4  | -1,838812296 | -1,738067356 | -0,10074494 |  |
| 216216_at    | SLIT3   | -1,838812296 | -1,738067356 | -0,10074494 |  |
| 230204_at    | HAPLN1  | -1,838812296 | -1,738067356 | -0,10074494 |  |
| 232874_at    | DOCK9   | -1,838812296 | -1,738067356 | -0,10074494 |  |
| 233081_at    | -       | -1,838812296 | -1,738067356 | -0,10074494 |  |
| 234021_at    | EML2    | -1,838812296 | -1,738067356 | -0,10074494 |  |
| 234298_at    | -       | -1,838812296 | -1,738067356 | -0,10074494 |  |
| 234740_at    | CDC14B  | -1,838812296 | -1,738067356 | -0,10074494 |  |
| 204032_at    | BCAR3   | 1,406361373  | 1,507116528  | -0,10075515 |  |
| 212884_x_at  | APOE    | 5,522627195  | 5,623388815  | -0,10076162 |  |
| 56821_at     | SLC38A7 | 1,428555646  | 1,529325159  | -0,10076951 |  |
| 212742_at    | RNF115  | 2,288253583  | 2,389070873  | -0,10081729 |  |
| 1559131_a_at | -       | 1,990274687  | 2,091116676  | -0,10084199 |  |
| 210720_s_at  | NECAB3  | 0,928678725  | 1,029536893  | -0,10085817 |  |
| 213724_s_at  | PDK2    | 0,928678725  | 1,029536893  | -0,10085817 |  |
| 226854_at    | GTPBP5  | 1,575032557  | 1,675891488  | -0,10085893 |  |
| 222658_s_at  | APTXX   | 2,382221458  | 2,483094137  | -0,10087268 |  |

|              |                 |              |              |             |  |
|--------------|-----------------|--------------|--------------|-------------|--|
| 223255_at    | G2E3            | 2,382221458  | 2,483094137  | -0,10087268 |  |
| 1553276_at   | ZNF560          | -2,187914861 | -2,086984744 | -0,10093012 |  |
| 1555179_at   | IGHV7-81        | -2,187914861 | -2,086984744 | -0,10093012 |  |
| 1556333_at   | -               | -2,187914861 | -2,086984744 | -0,10093012 |  |
| 1556413_a_at | -               | -2,187914861 | -2,086984744 | -0,10093012 |  |
| 1558315_s_at | HOOK3           | -2,187914861 | -2,086984744 | -0,10093012 |  |
| 1559255_a_at | -               | -2,187914861 | -2,086984744 | -0,10093012 |  |
| 1559579_at   | LOC283688       | -2,187914861 | -2,086984744 | -0,10093012 |  |
| 1560332_at   | -               | -2,187914861 | -2,086984744 | -0,10093012 |  |
| 1560493_a_at | CPXCR1          | -2,187914861 | -2,086984744 | -0,10093012 |  |
| 1564204_at   | FAM91A2         | -2,187914861 | -2,086984744 | -0,10093012 |  |
| 1566768_at   | -               | -2,187914861 | -2,086984744 | -0,10093012 |  |
| 207759_s_at  | DISC1 /// TSNAX | -2,187914861 | -2,086984744 | -0,10093012 |  |
| 207803_s_at  | CSN3            | -2,187914861 | -2,086984744 | -0,10093012 |  |
| 208428_at    | TAP2            | -2,187914861 | -2,086984744 | -0,10093012 |  |
| 211553_x_at  | APAF1           | -2,187914861 | -2,086984744 | -0,10093012 |  |
| 215542_at    | -               | -2,187914861 | -2,086984744 | -0,10093012 |  |
| 216708_x_at  | CKAP2           | -2,187914861 | -2,086984744 | -0,10093012 |  |
| 216891_at    | -               | -2,187914861 | -2,086984744 | -0,10093012 |  |
| 220270_at    | RNF17           | -2,187914861 | -2,086984744 | -0,10093012 |  |
| 221172_at    | C7orf69         | -2,187914861 | -2,086984744 | -0,10093012 |  |
| 229209_at    | SNHG10          | -2,187914861 | -2,086984744 | -0,10093012 |  |
| 231010_at    | AP1AR           | -2,187914861 | -2,086984744 | -0,10093012 |  |
| 233207_at    | DISC1           | -2,187914861 | -2,086984744 | -0,10093012 |  |
| 233901_at    | -               | -2,187914861 | -2,086984744 | -0,10093012 |  |
| 234275_at    | -               | -2,187914861 | -2,086984744 | -0,10093012 |  |
| 235345_at    | RUFY2           | -2,187914861 | -2,086984744 | -0,10093012 |  |
| 240222_at    | -               | -2,187914861 | -2,086984744 | -0,10093012 |  |
| 242576_x_at  | -               | -2,187914861 | -2,086984744 | -0,10093012 |  |
| 243141_at    | SGMS2           | -2,187914861 | -2,086984744 | -0,10093012 |  |
| 243324_x_at  | TNPO1           | -2,187914861 | -2,086984744 | -0,10093012 |  |
| 208021_s_at  | RFC1            | 2,779171778  | 2,880111483  | -0,10093971 |  |
| 224667_x_at  | ANAPC16         | 2,830080806  | 2,93104672   | -0,10096591 |  |
| 212373_at    | FEM1B           | 2,261526912  | 2,362515214  | -0,1009883  |  |
| 200737_at    | LOC100652805 /  | 4,773932904  | 4,874946109  | -0,1010132  |  |
| 218653_at    | SLC25A15        | 3,171349466  | 3,272369332  | -0,10101987 |  |
| 203282_at    | GBE1            | 5,078917028  | 5,179953903  | -0,10103687 |  |
| 1558305_at   | GIGYF2          | 0,103263601  | 0,204310755  | -0,10104715 |  |
| 1558695_at   | -               | 0,103263601  | 0,204310755  | -0,10104715 |  |
| 212421_at    | KIAA0930        | 0,103263601  | 0,204310755  | -0,10104715 |  |
| 215458_s_at  | SMURF1          | 0,103263601  | 0,204310755  | -0,10104715 |  |
| 222817_at    | HSD3B7          | 0,103263601  | 0,204310755  | -0,10104715 |  |
| 230761_at    | -               | 0,103263601  | 0,204310755  | -0,10104715 |  |
| 232620_at    | WDR93           | 0,103263601  | 0,204310755  | -0,10104715 |  |
| 243491_at    | -               | 0,103263601  | 0,204310755  | -0,10104715 |  |
| 223154_at    | MRPL1           | 3,902669169  | 4,003717379  | -0,10104821 |  |
| 201806_s_at  | ATXN2L          | 0,209623097  | 0,310717132  | -0,10109403 |  |
| 209038_s_at  | EHD1            | 0,209623097  | 0,310717132  | -0,10109403 |  |
| 219829_at    | ITGB1BP2        | 0,209623097  | 0,310717132  | -0,10109403 |  |
| 236012_at    | PSMF1           | 0,209623097  | 0,310717132  | -0,10109403 |  |
| 1552364_s_at | MSI2            | -0,83191556  | -0,730778808 | -0,10113675 |  |
| 1558119_at   | TSPAN17         | -0,83191556  | -0,730778808 | -0,10113675 |  |
| 1560488_at   | LCNL1           | -0,83191556  | -0,730778808 | -0,10113675 |  |
| 202046_s_at  | ARHGAP35        | -0,83191556  | -0,730778808 | -0,10113675 |  |
| 205375_at    | MDF1            | -0,83191556  | -0,730778808 | -0,10113675 |  |
| 210258_at    | RGS13           | -0,83191556  | -0,730778808 | -0,10113675 |  |



|             |                 |              |              |             |  |
|-------------|-----------------|--------------|--------------|-------------|--|
| 212807_s_at | SORT1           | -0,83191556  | -0,730778808 | -0,10113675 |  |
| 215349_at   | BTBD18          | -0,83191556  | -0,730778808 | -0,10113675 |  |
| 216790_at   | -               | -0,83191556  | -0,730778808 | -0,10113675 |  |
| 220914_at   | -               | -0,83191556  | -0,730778808 | -0,10113675 |  |
| 226549_at   | SBK1            | -0,83191556  | -0,730778808 | -0,10113675 |  |
| 230347_at   | ORAI2           | -0,83191556  | -0,730778808 | -0,10113675 |  |
| 233151_s_at | TTY7            | -0,83191556  | -0,730778808 | -0,10113675 |  |
| 234177_at   | -               | -0,83191556  | -0,730778808 | -0,10113675 |  |
| 238621_at   | FMN1 /// LOC100 | -0,83191556  | -0,730778808 | -0,10113675 |  |
| 222513_s_at | SORBS1          | 1,530951994  | 1,632095957  | -0,10114396 |  |
| 203225_s_at | RFK             | 3,489018063  | 3,590171466  | -0,1011534  |  |
| 1561075_at  | -               | -1,888254346 | -1,787089803 | -0,10116454 |  |
| 1562299_at  | LOC100652860 /  | -1,888254346 | -1,787089803 | -0,10116454 |  |
| 1562716_at  | LOC284632       | -1,888254346 | -1,787089803 | -0,10116454 |  |
| 212843_at   | NCAM1           | -1,888254346 | -1,787089803 | -0,10116454 |  |
| 219689_at   | SEMA3G          | -1,888254346 | -1,787089803 | -0,10116454 |  |
| 229277_at   | ADRB1           | -1,888254346 | -1,787089803 | -0,10116454 |  |
| 230314_at   | -               | -1,888254346 | -1,787089803 | -0,10116454 |  |
| 230357_at   | -               | -1,888254346 | -1,787089803 | -0,10116454 |  |
| 230953_at   | LOC100286922    | -1,888254346 | -1,787089803 | -0,10116454 |  |
| 233830_at   | LOC90246        | -1,888254346 | -1,787089803 | -0,10116454 |  |
| 234382_x_at | -               | -1,888254346 | -1,787089803 | -0,10116454 |  |
| 235122_at   | HIVEP3          | -1,888254346 | -1,787089803 | -0,10116454 |  |
| 236464_at   | -               | -1,888254346 | -1,787089803 | -0,10116454 |  |
| 243694_at   | -               | -1,888254346 | -1,787089803 | -0,10116454 |  |
| 224477_s_at | NUDT16L1        | 1,649074067  | 1,750261389  | -0,10118732 |  |
| 228183_s_at | RPAIN           | 4,27755489   | 4,378751229  | -0,10119634 |  |
| 228879_at   | SNORD104        | 2,331726354  | 2,432926755  | -0,1012004  |  |
| 1554595_at  | SYMPK           | 1,758252436  | 1,859476797  | -0,10122436 |  |
| 1566454_at  | LOC100507494    | 0,57058931   | 0,67181667   | -0,10122736 |  |
| 206317_s_at | ABCB8           | 0,57058931   | 0,67181667   | -0,10122736 |  |
| 215497_s_at | WDTC1           | 0,57058931   | 0,67181667   | -0,10122736 |  |
| 1559069_at  | MTHFS /// ST20- | -2,138804305 | -2,037551727 | -0,10125258 |  |
| 1561984_at  | LOC100505583    | -2,138804305 | -2,037551727 | -0,10125258 |  |
| 1565844_at  | BRPF3           | -2,138804305 | -2,037551727 | -0,10125258 |  |
| 1568787_at  | LOC100506083    | -2,138804305 | -2,037551727 | -0,10125258 |  |
| 215474_at   | -               | -2,138804305 | -2,037551727 | -0,10125258 |  |
| 215602_at   | FGD2            | -2,138804305 | -2,037551727 | -0,10125258 |  |
| 216724_at   | DCLK2           | -2,138804305 | -2,037551727 | -0,10125258 |  |
| 217242_at   | ZNF154          | -2,138804305 | -2,037551727 | -0,10125258 |  |
| 217671_at   | DSERG1          | -2,138804305 | -2,037551727 | -0,10125258 |  |
| 219894_at   | MAGEL2          | -2,138804305 | -2,037551727 | -0,10125258 |  |
| 230227_at   | -               | -2,138804305 | -2,037551727 | -0,10125258 |  |
| 232584_at   | -               | -2,138804305 | -2,037551727 | -0,10125258 |  |
| 240584_at   | -               | -2,138804305 | -2,037551727 | -0,10125258 |  |
| 240894_at   | LOC100505649    | -2,138804305 | -2,037551727 | -0,10125258 |  |
| 240898_at   | SPAG16          | -2,138804305 | -2,037551727 | -0,10125258 |  |
| 241216_at   | -               | -2,138804305 | -2,037551727 | -0,10125258 |  |
| 241542_at   | -               | -2,138804305 | -2,037551727 | -0,10125258 |  |
| 241793_at   | MSS51           | -2,138804305 | -2,037551727 | -0,10125258 |  |
| 243103_at   | -               | -2,138804305 | -2,037551727 | -0,10125258 |  |
| 243875_at   | CCDC158         | -2,138804305 | -2,037551727 | -0,10125258 |  |
| 244879_at   | -               | -2,138804305 | -2,037551727 | -0,10125258 |  |
| 201416_at   | SOX4            | 3,834791978  | 3,936060909  | -0,10126893 |  |
| 212052_s_at | TBC1D9B         | 1,923647937  | 2,024923328  | -0,10127539 |  |
| 230027_s_at | MRPL43          | 3,638448528  | 3,739727424  | -0,1012789  |  |

|              |                 |              |              |             |  |
|--------------|-----------------|--------------|--------------|-------------|--|
| 202111_at    | SLC4A2          | 2,014487247  | 2,115788273  | -0,10130103 |  |
| 212978_at    | LRRC8B          | 4,336364681  | 4,437669916  | -0,10130523 |  |
| 204217_s_at  | RTN2            | 0,859074518  | 0,960386719  | -0,1013122  |  |
| 227961_at    | CTSB            | 0,859074518  | 0,960386719  | -0,1013122  |  |
| 200972_at    | TSPAN3          | 5,002964274  | 5,104301818  | -0,10133754 |  |
| 236777_at    | LOC100129195    | 2,281618189  | 2,382985886  | -0,1013677  |  |
| 217934_x_at  | STUB1           | 3,998848507  | 4,100219485  | -0,10137098 |  |
| 208656_s_at  | CCNI            | 4,820071768  | 4,921519966  | -0,1014482  |  |
| 224326_s_at  | PCGF6           | 3,807337009  | 3,908790275  | -0,10145327 |  |
| 222216_s_at  | MRPL17          | 3,873548912  | 3,975013041  | -0,10146413 |  |
| 204537_s_at  | GABRE /// MIR22 | 1,607231019  | 1,708698295  | -0,10146728 |  |
| 221876_at    | ZNF783          | 2,840652551  | 2,942125533  | -0,10147298 |  |
| 1552777_a_at | RAET1E          | -1,964176657 | -1,862647763 | -0,10152889 |  |
| 1554790_at   | ZSCAN20         | -1,964176657 | -1,862647763 | -0,10152889 |  |
| 1558858_at   | -               | -1,964176657 | -1,862647763 | -0,10152889 |  |
| 1562523_at   | -               | -1,964176657 | -1,862647763 | -0,10152889 |  |
| 1565947_a_at | CHML            | -1,964176657 | -1,862647763 | -0,10152889 |  |
| 1566108_at   | MYNN            | -1,964176657 | -1,862647763 | -0,10152889 |  |
| 207116_s_at  | GAPDHS          | -1,964176657 | -1,862647763 | -0,10152889 |  |
| 216227_at    | -               | -1,964176657 | -1,862647763 | -0,10152889 |  |
| 216352_x_at  | PCDHGA3         | -1,964176657 | -1,862647763 | -0,10152889 |  |
| 226482_s_at  | TSTD1           | -1,964176657 | -1,862647763 | -0,10152889 |  |
| 228321_s_at  | NAA30           | -1,964176657 | -1,862647763 | -0,10152889 |  |
| 230471_at    | TMEM30B         | -1,964176657 | -1,862647763 | -0,10152889 |  |
| 232632_at    | -               | -1,964176657 | -1,862647763 | -0,10152889 |  |
| 232723_at    | -               | -1,964176657 | -1,862647763 | -0,10152889 |  |
| 232812_at    | LOC401052       | -1,964176657 | -1,862647763 | -0,10152889 |  |
| 233302_at    | -               | -1,964176657 | -1,862647763 | -0,10152889 |  |
| 236098_at    | C17orf110       | -1,964176657 | -1,862647763 | -0,10152889 |  |
| 236166_at    | LOC285147       | -1,964176657 | -1,862647763 | -0,10152889 |  |
| 236859_at    | RUNX2           | -1,964176657 | -1,862647763 | -0,10152889 |  |
| 239079_at    | ADAM7           | -1,964176657 | -1,862647763 | -0,10152889 |  |
| 241315_at    | -               | -1,964176657 | -1,862647763 | -0,10152889 |  |
| 243025_at    | -               | -1,964176657 | -1,862647763 | -0,10152889 |  |
| 243814_at    | LOC100505963    | -1,964176657 | -1,862647763 | -0,10152889 |  |
| 244524_at    | -               | -1,964176657 | -1,862647763 | -0,10152889 |  |
| 210624_s_at  | ILVBL           | 2,327437554  | 2,428994491  | -0,10155694 |  |
| 223776_x_at  | TINF2           | 2,87191078   | 2,973511251  | -0,10160047 |  |
| 1556931_at   | -               | -2,063149277 | -1,961547147 | -0,10160213 |  |
| 1560007_at   | LOC645984       | -2,063149277 | -1,961547147 | -0,10160213 |  |
| 1561652_at   | BECN1           | -2,063149277 | -1,961547147 | -0,10160213 |  |
| 1563108_at   | ELFN2           | -2,063149277 | -1,961547147 | -0,10160213 |  |
| 1565690_at   | -               | -2,063149277 | -1,961547147 | -0,10160213 |  |
| 1567240_x_at | OR2L2           | -2,063149277 | -1,961547147 | -0,10160213 |  |
| 1568914_at   | OPN5            | -2,063149277 | -1,961547147 | -0,10160213 |  |
| 206331_at    | CALCRL          | -2,063149277 | -1,961547147 | -0,10160213 |  |
| 207373_at    | HOXD10          | -2,063149277 | -1,961547147 | -0,10160213 |  |
| 209946_at    | VEGFC           | -2,063149277 | -1,961547147 | -0,10160213 |  |
| 210602_s_at  | CDH6            | -2,063149277 | -1,961547147 | -0,10160213 |  |
| 211959_at    | IGFBP5          | -2,063149277 | -1,961547147 | -0,10160213 |  |
| 213609_s_at  | SEZ6L           | -2,063149277 | -1,961547147 | -0,10160213 |  |
| 214821_at    | SLC25A4         | -2,063149277 | -1,961547147 | -0,10160213 |  |
| 216690_at    | OR7C1           | -2,063149277 | -1,961547147 | -0,10160213 |  |
| 217101_at    | TTC39A          | -2,063149277 | -1,961547147 | -0,10160213 |  |
| 219941_at    | TMEM19          | -2,063149277 | -1,961547147 | -0,10160213 |  |
| 220875_at    | -               | -2,063149277 | -1,961547147 | -0,10160213 |  |

|              |                 |              |              |             |  |
|--------------|-----------------|--------------|--------------|-------------|--|
| 221349_at    | VPREB1          | -2,063149277 | -1,961547147 | -0,10160213 |  |
| 229938_at    | TMEM238         | -2,063149277 | -1,961547147 | -0,10160213 |  |
| 230610_at    | -               | -2,063149277 | -1,961547147 | -0,10160213 |  |
| 230867_at    | COL6A6          | -2,063149277 | -1,961547147 | -0,10160213 |  |
| 233048_at    | -               | -2,063149277 | -1,961547147 | -0,10160213 |  |
| 235261_at    | UNC45B          | -2,063149277 | -1,961547147 | -0,10160213 |  |
| 237468_at    | -               | -2,063149277 | -1,961547147 | -0,10160213 |  |
| 238301_at    | -               | -2,063149277 | -1,961547147 | -0,10160213 |  |
| 240043_at    | CXorf64         | -2,063149277 | -1,961547147 | -0,10160213 |  |
| 241462_at    | -               | -2,063149277 | -1,961547147 | -0,10160213 |  |
| 244231_at    | BPI             | -2,063149277 | -1,961547147 | -0,10160213 |  |
| 1554519_at   | CD80            | -2,01371626  | -1,912089812 | -0,10162645 |  |
| 1554728_at   | SLC9A1          | -2,01371626  | -1,912089812 | -0,10162645 |  |
| 1554840_at   | LOC280665       | -2,01371626  | -1,912089812 | -0,10162645 |  |
| 1559144_x_at | LOC100130581    | -2,01371626  | -1,912089812 | -0,10162645 |  |
| 1560903_at   | -               | -2,01371626  | -1,912089812 | -0,10162645 |  |
| 1560905_at   | -               | -2,01371626  | -1,912089812 | -0,10162645 |  |
| 1561602_at   | LOC100129476    | -2,01371626  | -1,912089812 | -0,10162645 |  |
| 1562825_at   | -               | -2,01371626  | -1,912089812 | -0,10162645 |  |
| 1564836_at   | -               | -2,01371626  | -1,912089812 | -0,10162645 |  |
| 207178_s_at  | FRK             | -2,01371626  | -1,912089812 | -0,10162645 |  |
| 207794_at    | CCR2            | -2,01371626  | -1,912089812 | -0,10162645 |  |
| 208367_x_at  | CYP3A4          | -2,01371626  | -1,912089812 | -0,10162645 |  |
| 208513_at    | FOXB1           | -2,01371626  | -1,912089812 | -0,10162645 |  |
| 209719_x_at  | SERPINB3        | -2,01371626  | -1,912089812 | -0,10162645 |  |
| 211307_s_at  | FCAR            | -2,01371626  | -1,912089812 | -0,10162645 |  |
| 220723_s_at  | CWH43           | -2,01371626  | -1,912089812 | -0,10162645 |  |
| 221122_at    | HRASLS2         | -2,01371626  | -1,912089812 | -0,10162645 |  |
| 231134_at    | C20orf79        | -2,01371626  | -1,912089812 | -0,10162645 |  |
| 232315_at    | ZNF880          | -2,01371626  | -1,912089812 | -0,10162645 |  |
| 232783_at    | -               | -2,01371626  | -1,912089812 | -0,10162645 |  |
| 232876_at    | -               | -2,01371626  | -1,912089812 | -0,10162645 |  |
| 234167_at    | MKI67IP         | -2,01371626  | -1,912089812 | -0,10162645 |  |
| 235841_at    | -               | -2,01371626  | -1,912089812 | -0,10162645 |  |
| 237656_at    | WWC2            | -2,01371626  | -1,912089812 | -0,10162645 |  |
| 237756_at    | KLHL23 /// PHOS | -2,01371626  | -1,912089812 | -0,10162645 |  |
| 242741_x_at  | -               | -2,01371626  | -1,912089812 | -0,10162645 |  |
| 244081_at    | -               | -2,01371626  | -1,912089812 | -0,10162645 |  |
| 244415_at    | -               | -2,01371626  | -1,912089812 | -0,10162645 |  |
| 226744_at    | METTL16         | 3,348994562  | 3,450709925  | -0,10171536 |  |
| 218152_at    | HMG20A          | 2,979690938  | 3,081412119  | -0,10172118 |  |
| 224915_x_at  | ZNFX1-AS1       | 6,733902967  | 6,835634048  | -0,10173108 |  |
| 208050_s_at  | CASP2           | 2,371846398  | 2,473581079  | -0,10173468 |  |
| 218801_at    | UGGT2           | 2,094906514  | 2,196649505  | -0,10174299 |  |
| 230389_at    | FNBP1           | 1,64218396   | 1,743944487  | -0,10176053 |  |
| 217736_s_at  | EIF2AK1         | 4,008926642  | 4,110690475  | -0,10176383 |  |
| 220615_s_at  | FAR2            | 1,523472489  | 1,6252386    | -0,10176611 |  |
| 212816_s_at  | CBS             | 3,837056482  | 3,938828971  | -0,10177249 |  |
| 209472_at    | CCBL2           | 3,63237684   | 3,734161076  | -0,10178424 |  |
| 205165_at    | CELSR3          | 0,715481152  | 0,817300337  | -0,10181919 |  |
| 209798_at    | NPAT            | 3,008105382  | 3,109937707  | -0,10183232 |  |
| 213773_x_at  | NSUN5           | 4,12096073   | 4,222822694  | -0,10186196 |  |
| 230091_at    | -               | -0,148196756 | -0,046302147 | -0,10189461 |  |
| 230751_at    | WNT4            | -0,148196756 | -0,046302147 | -0,10189461 |  |
| 235214_at    | LURAP1          | -0,148196756 | -0,046302147 | -0,10189461 |  |
| 244858_at    | TGIF1           | -0,148196756 | -0,046302147 | -0,10189461 |  |

|              |                  |              |              |             |  |
|--------------|------------------|--------------|--------------|-------------|--|
| 205145_s_at  | MYL5             | -0,022466681 | 0,079428135  | -0,10189482 |  |
| 215376_at    | -                | -0,022466681 | 0,079428135  | -0,10189482 |  |
| 232135_at    | SAP30L           | -0,022466681 | 0,079428135  | -0,10189482 |  |
| 230370_x_at  | STYXL1           | 3,28739962   | 3,38929984   | -0,10190022 |  |
| 226146_at    | LOC100859930     | 2,146943689  | 2,248887791  | -0,1019441  |  |
| 202220_at    | KIAA0907         | 4,153426622  | 4,25538582   | -0,1019592  |  |
| 216295_s_at  | CLTA             | 5,744725693  | 5,846709652  | -0,10198396 |  |
| 1558093_s_at | MATR3 /// SNHG   | 3,249366227  | 3,351366359  | -0,10200013 |  |
| 210988_s_at  | PRUNE            | 1,748661581  | 1,85068474   | -0,10202316 |  |
| 210336_x_at  | MZF1             | 2,390468117  | 2,492544876  | -0,10207676 |  |
| 201034_at    | ADD3             | 4,905270836  | 5,007422593  | -0,10215176 |  |
| 208907_s_at  | MRPS18B          | 3,815781597  | 3,917937882  | -0,10215629 |  |
| 211073_x_at  | RNU86 /// RPL3 / | 7,678271917  | 7,780437486  | -0,10216557 |  |
| 227678_at    | XRCC6BP1         | 2,814842651  | 2,917077481  | -0,10223483 |  |
| 218061_at    | MEA1             | 4,806268808  | 4,90851716   | -0,10224835 |  |
| 204046_at    | PLCB2            | 0,911589958  | 1,013870809  | -0,10228085 |  |
| 213492_at    | COL2A1           | 0,911589958  | 1,013870809  | -0,10228085 |  |
| 204710_s_at  | WIPI2            | 3,464815649  | 3,56709884   | -0,10228319 |  |
| 235545_at    | DEPDC1           | 1,672933557  | 1,775255987  | -0,10232243 |  |
| 223531_x_at  | GPR89A /// GPR   | 3,671816548  | 3,77423254   | -0,10241599 |  |
| 1554179_s_at | LYNX1            | 0,555999837  | 0,658444279  | -0,10244444 |  |
| 203358_s_at  | EZH2             | 4,628994365  | 4,731460135  | -0,10246577 |  |
| 229862_x_at  | ZBTB45           | 1,90937145   | 2,011838132  | -0,10246668 |  |
| 215628_x_at  | -                | 1,339784194  | 1,442269454  | -0,10248526 |  |
| 201781_s_at  | AIP              | 2,139623739  | 2,242180416  | -0,10255668 |  |
| 1563072_at   | -                | -3,41365796  | -3,311072652 | -0,10258531 |  |
| 229632_s_at  | INTS10           | 3,907705327  | 4,010311743  | -0,10260642 |  |
| 204466_s_at  | SNCA             | 4,851400868  | 4,954036493  | -0,10263563 |  |
| 202253_s_at  | DNM2             | 3,111496958  | 3,21415095   | -0,10265399 |  |
| 213705_at    | GGCX             | 1,027166904  | 1,129843209  | -0,1026763  |  |
| 203531_at    | CUL5             | 3,858765357  | 3,96146507   | -0,10269971 |  |
| 41220_at     | 40057            | 4,762263187  | 4,864975253  | -0,10271207 |  |
| 201630_s_at  | ACP1             | 4,28365562   | 4,386375749  | -0,10272013 |  |
| 210802_s_at  | DIMT1            | 3,393780562  | 3,496520471  | -0,10273991 |  |
| 218282_at    | EDEM2            | 2,109966786  | 2,212749286  | -0,1027825  |  |
| 208987_s_at  | KDM2A            | 0,702292136  | 0,805216064  | -0,10292393 |  |
| 1560741_at   | SNRPN /// SNUR   | -0,299034815 | -0,19610998  | -0,10292483 |  |
| 1565715_at   | -                | -0,299034815 | -0,19610998  | -0,10292483 |  |
| 209156_s_at  | COL6A2           | -0,299034815 | -0,19610998  | -0,10292483 |  |
| 210967_x_at  | CACNB1           | -0,299034815 | -0,19610998  | -0,10292483 |  |
| 228946_at    | INTU             | -0,299034815 | -0,19610998  | -0,10292483 |  |
| 229728_at    | -                | -0,299034815 | -0,19610998  | -0,10292483 |  |
| 234077_at    | -                | -0,299034815 | -0,19610998  | -0,10292483 |  |
| 240692_at    | MGC34796         | -0,299034815 | -0,19610998  | -0,10292483 |  |
| 212603_at    | MRPS31           | 4,118170245  | 4,221118236  | -0,10294799 |  |
| 209275_s_at  | CLN3             | 2,487840343  | 2,590852465  | -0,10301212 |  |
| 201290_at    | SEC11A           | 5,748540079  | 5,851583612  | -0,10304353 |  |
| 221856_s_at  | FAM63A           | 0,46522187   | 0,568365095  | -0,10314323 |  |
| 228914_at    | -                | 0,46522187   | 0,568365095  | -0,10314323 |  |
| 36888_at     | HAUS5            | 2,506929603  | 2,610082303  | -0,1031527  |  |
| 212457_at    | TFE3             | 3,399920684  | 3,503081281  | -0,1031606  |  |
| 227937_at    | MYPOP            | 0,962260738  | 1,065442793  | -0,10318205 |  |
| 213988_s_at  | SAT1             | 5,846393664  | 5,949621775  | -0,10322811 |  |
| 204040_at    | RNF144A          | 0,376672223  | 0,479907041  | -0,10323482 |  |
| 239466_at    | LOC344595        | 0,376672223  | 0,479907041  | -0,10323482 |  |
| 212722_s_at  | JMJD6            | 2,680059304  | 2,783327323  | -0,10326802 |  |

|              |                 |             |              |             |  |
|--------------|-----------------|-------------|--------------|-------------|--|
| 225315_at    | MRPL21          | 4,353339172 | 4,456625687  | -0,10328651 |  |
| 218477_at    | TMEM14A         | 3,69780007  | 3,801102381  | -0,10330231 |  |
| 219035_s_at  | RNF34           | 3,397876879 | 3,501209806  | -0,10333293 |  |
| 202521_at    | CTCF            | 3,776205896 | 3,879554231  | -0,10334834 |  |
| 228993_s_at  | BBIP1           | 2,305800198 | 2,409170778  | -0,10337058 |  |
| 213455_at    | FAM114A1        | 1,073999308 | 1,177496821  | -0,10349751 |  |
| 215567_at    | FCF1            | 1,073999308 | 1,177496821  | -0,10349751 |  |
| 201720_s_at  | LAPTM5          | 6,327691746 | 6,431256109  | -0,10356436 |  |
| 219119_at    | NAA38           | 5,775749279 | 5,879316279  | -0,103567   |  |
| 1560712_at   | TMPRSS11B       | 0,072842263 | 0,176436073  | -0,10359381 |  |
| 210822_at    | RPL13P5         | 0,072842263 | 0,176436073  | -0,10359381 |  |
| 229473_at    | MAMDC4          | 0,072842263 | 0,176436073  | -0,10359381 |  |
| 231416_at    | DHDH            | 0,072842263 | 0,176436073  | -0,10359381 |  |
| 225337_at    | ABHD2           | 4,702455242 | 4,806123612  | -0,10366837 |  |
| 223183_at    | AGPAT3          | 2,325288363 | 2,428994491  | -0,10370613 |  |
| 203360_s_at  | GJA9 /// GJA9-M | 3,977794563 | 4,08155382   | -0,10375926 |  |
| 202639_s_at  | RANBP3          | 1,177702228 | 1,281471383  | -0,10376916 |  |
| 212288_at    | FNBP1           | 4,138203514 | 4,242000447  | -0,10379693 |  |
| 201159_s_at  | NMT1            | 0,82905153  | 0,932882274  | -0,10383074 |  |
| 212642_s_at  | HIVEP2          | 0,82905153  | 0,932882274  | -0,10383074 |  |
| 202848_s_at  | GRK6            | 1,954567604 | 2,058399602  | -0,103832   |  |
| 212547_at    | BRD3            | 2,227406889 | 2,331254065  | -0,10384718 |  |
| 209153_s_at  | TCF3            | 3,938261899 | 4,042195463  | -0,10393356 |  |
| 236664_at    | AKT2            | 0,760715727 | 0,864649967  | -0,10393424 |  |
| 218405_at    | ABT1            | 2,827046023 | 2,93104672   | -0,1040007  |  |
| 219737_s_at  | PCDH9           | 1,274448124 | 1,378453643  | -0,10400552 |  |
| 225162_at    | SH3D19          | 0,273439642 | 0,377530647  | -0,104091   |  |
| 238440_at    | CLYBL           | 0,273439642 | 0,377530647  | -0,104091   |  |
| 1569765_at   | -               | 1,614289682 | 1,718396606  | -0,10410692 |  |
| 216266_s_at  | ARFGEF1         | 1,614289682 | 1,718396606  | -0,10410692 |  |
| 222040_at    | HNRNPA1         | 2,272723257 | 2,376875125  | -0,10415187 |  |
| 1555590_a_at | GATA1           | 3,833280332 | 3,937445604  | -0,10416527 |  |
| 208840_s_at  | G3BP2           | 3,731461974 | 3,835672678  | -0,1042107  |  |
| 216199_s_at  | MAP3K4          | 3,731461974 | 3,835672678  | -0,1042107  |  |
| 242463_x_at  | ZNF600          | 2,739371812 | 2,843651104  | -0,10427929 |  |
| 33307_at     | RRP7A           | 2,440968446 | 2,545262994  | -0,10429455 |  |
| 223071_at    | IER3IP1         | 4,630735818 | 4,735047668  | -0,10431185 |  |
| 209587_at    | PITX1           | 0,533835206 | 0,638150376  | -0,10431517 |  |
| 227273_at    | -               | 0,533835206 | 0,638150376  | -0,10431517 |  |
| 222163_s_at  | SPATA5L1        | 3,543651662 | 3,647981081  | -0,10432942 |  |
| 200625_s_at  | CAP1            | 5,952374872 | 6,056711291  | -0,10433642 |  |
| 202210_x_at  | GSK3A           | 1,063722698 | 1,16809119   | -0,10436849 |  |
| 222662_at    | PPP1R3B         | 3,552865637 | 3,6572547    | -0,10438906 |  |
| 201234_at    | ILK             | 4,163687338 | 4,268097973  | -0,10441064 |  |
| 1553604_at   | ABCA13          | -3,37835    | -3,273861381 | -0,10448862 |  |
| 1554272_at   | ERAP2           | -3,37835    | -3,273861381 | -0,10448862 |  |
| 218160_at    | NDUFA8          | 4,744881223 | 4,849428913  | -0,10454769 |  |
| 209463_s_at  | TAF12           | 2,589836943 | 2,694398145  | -0,1045612  |  |
| 204283_at    | FARS2           | 2,915422315 | 3,019999252  | -0,10457694 |  |
| 202024_at    | ASNA1           | 5,047319952 | 5,151898085  | -0,10457813 |  |
| 209332_s_at  | MAX             | 5,383147391 | 5,487728917  | -0,10458153 |  |
| 1558809_s_at | ZNF790-AS1      | 0,682279745 | 0,786897721  | -0,10461798 |  |
| 201764_at    | TMEM106C        | 3,402980973 | 3,507749374  | -0,1047684  |  |
| 211048_s_at  | PDIA4           | 4,923500131 | 5,028365855  | -0,10486572 |  |
| 207365_x_at  | USP34           | 2,506929603 | 2,611817827  | -0,10488822 |  |
| 224378_x_at  | MAP1LC3A        | 1,000476627 | 1,105412836  | -0,10493621 |  |

|              |                  |              |              |             |  |
|--------------|------------------|--------------|--------------|-------------|--|
| 221487_s_at  | ENSA             | 1,485482016  | 1,590454215  | -0,1049722  |  |
| 226733_at    | PFKFB2           | 1,940595304  | 2,045615873  | -0,10502057 |  |
| 225492_at    | TMEM33           | 3,659073863  | 3,76412346   | -0,1050496  |  |
| 204599_s_at  | MRPL28           | 3,421207626  | 3,526272152  | -0,10506453 |  |
| 212422_at    | PDCD11           | 3,082523011  | 3,187631636  | -0,10510863 |  |
| 1554356_at   | GINS4            | -0,325749314 | -0,220592223 | -0,10515709 |  |
| 209918_at    | GGTLC2           | -0,325749314 | -0,220592223 | -0,10515709 |  |
| 210617_at    | PHEX             | -0,325749314 | -0,220592223 | -0,10515709 |  |
| 220743_at    | -                | -0,325749314 | -0,220592223 | -0,10515709 |  |
| 233090_at    | -                | -0,325749314 | -0,220592223 | -0,10515709 |  |
| 236256_at    | -                | -0,325749314 | -0,220592223 | -0,10515709 |  |
| 212694_s_at  | PCCB             | 5,022330613  | 5,127538192  | -0,10520758 |  |
| 222393_s_at  | NAA50            | 4,094703882  | 4,199929321  | -0,10522544 |  |
| 215090_x_at  | LOC440434        | 2,352981171  | 2,458228496  | -0,10524732 |  |
| 236128_at    | ZNF91            | 1,844820248  | 1,950068772  | -0,10524852 |  |
| 226299_at    | PKN3             | 1,210676994  | 1,315948728  | -0,10527173 |  |
| 229344_x_at  | RIMKLB           | 1,210676994  | 1,315948728  | -0,10527173 |  |
| 224867_at    | MINOS1           | 5,946793687  | 6,052084847  | -0,10529116 |  |
| 208755_x_at  | H3F3A /// H3F3A  | 6,895949501  | 7,00124364   | -0,10529414 |  |
| 203053_at    | BCAS2            | 4,100370717  | 4,205686812  | -0,10531609 |  |
| 219883_at    | C11orf20 /// KCN | 0,052199481  | 0,157549243  | -0,10534976 |  |
| 232247_at    | ZNF502           | 0,052199481  | 0,157549243  | -0,10534976 |  |
| 222575_at    | SETD5            | 2,159061673  | 2,264418116  | -0,10535644 |  |
| 222101_s_at  | DCHS1            | 0,351548291  | 0,456918297  | -0,10537001 |  |
| 223516_s_at  | PRICKLE4 /// TO  | 5,553480597  | 5,658867021  | -0,10538642 |  |
| 222380_s_at  | PDCD6            | 1,305306849  | 1,410714371  | -0,10540752 |  |
| 1552625_a_at | TRNT1            | 1,965648824  | 2,071071048  | -0,10542222 |  |
| 233011_at    | ANXA1            | 2,208874124  | 2,314300277  | -0,10542615 |  |
| 235035_at    | SLC35E1          | 2,520143371  | 2,625627364  | -0,10548399 |  |
| 201851_at    | SH3GL1           | 2,022468633  | 2,127967638  | -0,105499   |  |
| 210088_x_at  | MYL4             | 6,264389396  | 6,369891747  | -0,10550235 |  |
| 1553247_a_at | ZNF709           | 1,394109935  | 1,499637023  | -0,10552709 |  |
| 201423_s_at  | CUL4A            | 3,393780562  | 3,499335901  | -0,10555534 |  |
| 200672_x_at  | SPTBN1           | 0,518867317  | 0,624460759  | -0,10559344 |  |
| 204096_s_at  | ELL              | 0,518867317  | 0,624460759  | -0,10559344 |  |
| 210829_s_at  | SSBP2            | 0,518867317  | 0,624460759  | -0,10559344 |  |
| 227494_at    | LOC253842 /// N  | 1,04816921   | 1,153866761  | -0,10569755 |  |
| 213617_s_at  | TPGS2            | 3,547344317  | 3,653046807  | -0,10570249 |  |
| 202306_at    | POLR2G           | 5,34890961   | 5,454626748  | -0,10571714 |  |
| 210776_x_at  | TCF3             | 3,575646363  | 3,681421378  | -0,10577501 |  |
| 202000_at    | NDUFA6           | 3,01878441   | 3,124599694  | -0,10581528 |  |
| 205149_s_at  | CLCN4            | 1,153678675  | 1,259496994  | -0,10581832 |  |
| 222622_at    | PGP              | 3,495722611  | 3,601570866  | -0,10584826 |  |
| 212014_x_at  | CD44             | 1,251994932  | 1,3579181    | -0,10592317 |  |
| 238784_at    | DPY19L2          | 1,251994932  | 1,3579181    | -0,10592317 |  |
| 208914_at    | GGA2             | 1,473887017  | 1,579853228  | -0,10596621 |  |
| 213779_at    | EMID1            | 1,473887017  | 1,579853228  | -0,10596621 |  |
| 223996_s_at  | MRPL30           | 3,611363461  | 3,717332003  | -0,10596854 |  |
| 209139_s_at  | PRKRA            | 3,388643755  | 3,49464046   | -0,10599671 |  |
| 1552576_at   | ALMS1P           | -0,67289328  | -0,566887459 | -0,10600582 |  |
| 1552738_a_at | ST7L             | -0,67289328  | -0,566887459 | -0,10600582 |  |
| 1554049_s_at | DCAF8            | -0,67289328  | -0,566887459 | -0,10600582 |  |
| 1558740_s_at | -                | -0,67289328  | -0,566887459 | -0,10600582 |  |
| 1561705_at   | -                | -0,67289328  | -0,566887459 | -0,10600582 |  |
| 206197_at    | NME5             | -0,67289328  | -0,566887459 | -0,10600582 |  |
| 206802_at    | PAX5             | -0,67289328  | -0,566887459 | -0,10600582 |  |

|              |                 |              |              |             |  |
|--------------|-----------------|--------------|--------------|-------------|--|
| 216311_at    | OVOL3           | -0,67289328  | -0,566887459 | -0,10600582 |  |
| 220138_at    | HAND1           | -0,67289328  | -0,566887459 | -0,10600582 |  |
| 233767_at    | HHLA1           | -0,67289328  | -0,566887459 | -0,10600582 |  |
| 240831_at    | -               | -0,67289328  | -0,566887459 | -0,10600582 |  |
| 241243_at    | -               | -0,67289328  | -0,566887459 | -0,10600582 |  |
| 222077_s_at  | RACGAP1         | 4,170287948  | 4,276328567  | -0,10604062 |  |
| 214124_x_at  | FGFR1OP         | 3,420201053  | 3,526272152  | -0,1060711  |  |
| 201754_at    | COX6C           | 6,636021167  | 6,742164267  | -0,1061431  |  |
| 200936_at    | RPL8            | 7,774257112  | 7,880427117  | -0,10617    |  |
| 202109_at    | ARFIP2          | 1,926486359  | 2,032717854  | -0,10623149 |  |
| 1565603_at   | PWP2            | 0,984222186  | 1,090553537  | -0,10633135 |  |
| 203090_at    | SDF2            | 3,121439986  | 3,227795991  | -0,106356   |  |
| 1558044_s_at | EXOSC6          | 2,094906514  | 2,201267805  | -0,10636129 |  |
| 1563209_a_at | MACROD2         | -0,496991414 | -0,39061235  | -0,10637906 |  |
| 215645_at    | FLCN            | -0,496991414 | -0,39061235  | -0,10637906 |  |
| 223795_at    | TSPAN10         | -0,496991414 | -0,39061235  | -0,10637906 |  |
| 230983_at    | FAM129C         | -0,496991414 | -0,39061235  | -0,10637906 |  |
| 231154_x_at  | TINAG           | -0,496991414 | -0,39061235  | -0,10637906 |  |
| 232582_at    | -               | -0,496991414 | -0,39061235  | -0,10637906 |  |
| 237347_at    | -               | -0,496991414 | -0,39061235  | -0,10637906 |  |
| 240377_at    | LOC100288332 /  | -0,496991414 | -0,39061235  | -0,10637906 |  |
| 241399_at    | FAM19A2         | -0,496991414 | -0,39061235  | -0,10637906 |  |
| 228524_at    | ADCK5           | 0,246434561  | 0,352836757  | -0,1064022  |  |
| 203695_s_at  | DFNA5           | 1,094335495  | 1,200746069  | -0,10641057 |  |
| 1560998_x_at | -               | -3,342483913 | -3,236070201 | -0,10641371 |  |
| 206346_at    | PRLR            | -3,342483913 | -3,236070201 | -0,10641371 |  |
| 237717_x_at  | -               | -3,342483913 | -3,236070201 | -0,10641371 |  |
| 241674_s_at  | -               | -3,342483913 | -3,236070201 | -0,10641371 |  |
| 201293_x_at  | LOC100288602 /  | 7,85352687   | 7,959949706  | -0,10642284 |  |
| 202461_at    | EIF2B2          | 4,366985384  | 4,473427782  | -0,1064424  |  |
| 213208_at    | KIAA0240        | 0,798390451  | 0,904843258  | -0,10645281 |  |
| 1559352_a_at | MAFG-AS1        | 0,425644434  | 0,532164371  | -0,10651994 |  |
| 223126_s_at  | C1orf21         | 0,425644434  | 0,532164371  | -0,10651994 |  |
| 232037_at    | IGDCC3          | 0,425644434  | 0,532164371  | -0,10651994 |  |
| 201995_at    | EXT1            | 1,381753566  | 1,488344553  | -0,10659099 |  |
| 37943_at     | ZFYVE26         | 1,694740949  | 1,801346674  | -0,10660573 |  |
| 203895_at    | PLCB4           | 2,640847372  | 2,747463672  | -0,1066163  |  |
| 210128_s_at  | LTB4R           | -0,078265071 | 0,028364014  | -0,10662909 |  |
| 219044_at    | THNSL2          | -0,078265071 | 0,028364014  | -0,10662909 |  |
| 228276_at    | SAMD1           | -0,078265071 | 0,028364014  | -0,10662909 |  |
| 1555278_a_at | CKAP5           | 3,117719377  | 3,22439681   | -0,10667743 |  |
| 206911_at    | TRIM25          | 0,728550685  | 0,835239052  | -0,10668837 |  |
| 221715_at    | -               | 0,728550685  | 0,835239052  | -0,10668837 |  |
| 223092_at    | ANKH            | 0,728550685  | 0,835239052  | -0,10668837 |  |
| 242362_at    | -               | 0,728550685  | 0,835239052  | -0,10668837 |  |
| 225963_at    | KLHDC5          | 1,621313976  | 1,728030156  | -0,10671618 |  |
| 238494_at    | TRAF3IP1        | 1,621313976  | 1,728030156  | -0,10671618 |  |
| 1568618_a_at | GALNT1          | 4,515757928  | 4,622479552  | -0,10672162 |  |
| 200021_at    | CFL1            | 7,535098919  | 7,641883625  | -0,10678471 |  |
| 40665_at     | FMO3            | -3,103240143 | -2,996335703 | -0,10690444 |  |
| 40359_at     | RASSF7          | 2,53323721   | 2,64015659   | -0,10691938 |  |
| 227615_at    | -               | 1,976645579  | 2,083632167  | -0,10698659 |  |
| 208337_s_at  | NR5A2           | 1,542099044  | 1,64909809   | -0,10699905 |  |
| 226448_at    | FAM89A /// MIR1 | 3,663333942  | 3,770352811  | -0,10701887 |  |
| 208127_s_at  | SOCS5           | 1,758252436  | 1,865308541  | -0,1070561  |  |
| 221954_at    | C20orf111       | 1,823660386  | 1,930732138  | -0,10707175 |  |

|              |                 |              |              |             |  |
|--------------|-----------------|--------------|--------------|-------------|--|
| 203112_s_at  | MIR943 /// WHSC | 2,37600538   | 2,483094137  | -0,10708876 |  |
| 204061_at    | PRKX            | 1,946200473  | 2,053299695  | -0,10709922 |  |
| 222263_at    | SLC35E1         | 2,807162789  | 2,914267328  | -0,10710454 |  |
| 224671_at    | MRPL10          | 3,49093683   | 3,598072942  | -0,10713611 |  |
| 200775_s_at  | HNRNPK /// MIR  | 6,613300702  | 6,720510873  | -0,10721017 |  |
| 225991_at    | TMEM41A         | 3,111496958  | 3,218713651  | -0,10721669 |  |
| 204297_at    | PIK3C3          | 4,124054951  | 4,231314909  | -0,10725996 |  |
| 219116_s_at  | DCUN1D2         | 0,97328325   | 1,080561626  | -0,10727838 |  |
| 230192_at    | TRIM13          | 0,97328325   | 1,080561626  | -0,10727838 |  |
| 224906_at    | ANO6            | 3,738747209  | 3,846031735  | -0,10728453 |  |
| 227762_at    | -               | 2,577249059  | 2,684536601  | -0,10728754 |  |
| 1556567_at   | NAP1L4          | 1,283332461  | 1,390636111  | -0,10730365 |  |
| 225533_at    | PHF19           | 1,373456798  | 1,480766833  | -0,10731003 |  |
| 224764_at    | ARHGAP21        | 3,457965575  | 3,565308644  | -0,10734307 |  |
| 222683_at    | RNF20           | 3,761974695  | 3,869433939  | -0,10745924 |  |
| 219143_s_at  | RPP25           | 1,850809354  | 1,958277216  | -0,10746786 |  |
| 218798_at    | KRI1            | 4,209852334  | 4,317323511  | -0,10747118 |  |
| 214992_s_at  | DNASE2          | 0,648296226  | 0,755840599  | -0,10754437 |  |
| 210850_s_at  | ELK1            | 0,496120222  | 0,603679647  | -0,10755942 |  |
| 1558770_a_at | PIK3R6          | -0,926850548 | -0,819238336 | -0,10761221 |  |
| 1560620_at   | KCNK15          | -0,926850548 | -0,819238336 | -0,10761221 |  |
| 219686_at    | STK32B          | -0,926850548 | -0,819238336 | -0,10761221 |  |
| 224451_x_at  | ARHGAP9         | -0,926850548 | -0,819238336 | -0,10761221 |  |
| 227216_at    | RLTPR           | -0,926850548 | -0,819238336 | -0,10761221 |  |
| 229486_s_at  | TMEM132A        | -0,926850548 | -0,819238336 | -0,10761221 |  |
| 230775_s_at  | SPG20           | -0,926850548 | -0,819238336 | -0,10761221 |  |
| 235340_at    | GANC            | -0,926850548 | -0,819238336 | -0,10761221 |  |
| 235386_at    | -               | -0,926850548 | -0,819238336 | -0,10761221 |  |
| 238790_at    | LOC374443       | -0,926850548 | -0,819238336 | -0,10761221 |  |
| 213402_at    | ZNF787          | 1,683039483  | 1,790660532  | -0,10762105 |  |
| 235130_at    | PANK2           | 1,683039483  | 1,790660532  | -0,10762105 |  |
| 213263_s_at  | PCBP2           | 1,534677255  | 1,642321262  | -0,10764401 |  |
| 206635_at    | CHRNA2          | 1,454352496  | 1,562009954  | -0,10765746 |  |
| 204386_s_at  | MRP63           | 5,514868569  | 5,622528246  | -0,10765968 |  |
| 220890_s_at  | DDX47           | 4,871424335  | 4,979128808  | -0,10770447 |  |
| 1558136_s_at | TAF11           | 3,815781597  | 3,923538485  | -0,10775689 |  |
| 221927_s_at  | ABHD11          | 2,206540699  | 2,314300277  | -0,10775958 |  |
| 218267_at    | CINP            | 2,156646206  | 2,264418116  | -0,10777191 |  |
| 221499_s_at  | STX16           | 2,051361651  | 2,159161028  | -0,10779938 |  |
| 218493_at    | SNRNP25         | 4,870319181  | 4,978119995  | -0,10780081 |  |
| 220725_x_at  | DNAH3           | 1,937784532  | 2,045615873  | -0,10783134 |  |
| 40562_at     | GNA11           | 3,345287259  | 3,453132141  | -0,10784488 |  |
| 201024_x_at  | EIF5B           | 5,277061897  | 5,384911478  | -0,10784958 |  |
| 207549_x_at  | CD46            | 2,644299732  | 2,752192409  | -0,10789268 |  |
| 212186_at    | ACACA           | 3,551027544  | 3,658934427  | -0,10790688 |  |
| 220591_s_at  | EFHC2           | 1,129248302  | 1,23718272   | -0,10793442 |  |
| 233164_x_at  | RHBDD1          | 0,228146222  | 0,336136178  | -0,10798996 |  |
| 239223_s_at  | FBXL20          | 0,228146222  | 0,336136178  | -0,10798996 |  |
| 213229_at    | DICER1          | 4,035462473  | 4,143455947  | -0,10799347 |  |
| 221780_s_at  | DDX27           | 3,262904562  | 3,370970266  | -0,1080657  |  |
| 1552419_s_at | TTLL10          | 0,020670649  | 0,128747141  | -0,10807649 |  |
| 1559444_at   | -               | 0,020670649  | 0,128747141  | -0,10807649 |  |
| 239635_at    | RBM14           | 0,020670649  | 0,128747141  | -0,10807649 |  |
| 243304_at    | LOC286109       | 0,020670649  | 0,128747141  | -0,10807649 |  |
| 225435_at    | SSR1            | 2,874852734  | 2,982929462  | -0,10807673 |  |
| 215280_s_at  | PPFIA3          | 1,567778694  | 1,675891488  | -0,10811279 |  |



|              |                  |              |              |             |  |
|--------------|------------------|--------------|--------------|-------------|--|
| 225969_at    | ALKBH6           | 3,702775533  | 3,810956512  | -0,10818098 |  |
| 205020_s_at  | ARL4A            | 4,842035783  | 4,950269013  | -0,10823323 |  |
| 212491_s_at  | DNAJC8           | 3,340506684  | 3,448769219  | -0,10826253 |  |
| 220587_s_at  | MLST8            | 1,990274687  | 2,098562556  | -0,10828787 |  |
| 235387_at    | GSTCD            | 1,932146506  | 2,040470494  | -0,10832399 |  |
| 203120_at    | TP53BP2          | 3,361633475  | 3,469974737  | -0,10834126 |  |
| 202288_at    | MTOR             | 1,446464021  | 1,55481039   | -0,10834637 |  |
| 204127_at    | RFC3             | 4,486724797  | 4,595104545  | -0,10837975 |  |
| 208370_s_at  | RCAN1            | 2,776027875  | 2,884425449  | -0,10839757 |  |
| 201592_at    | EIF3H            | 6,647839946  | 6,75625794   | -0,10841799 |  |
| 226249_at    | SNX30            | 1,269985355  | 1,378453643  | -0,10846829 |  |
| 218556_at    | ORMDL2           | 2,758612869  | 2,867091644  | -0,10847878 |  |
| 213887_s_at  | POLR2E           | 4,402076958  | 4,51064824   | -0,10857128 |  |
| 204920_at    | CPS1             | 2,069451339  | 2,17802703   | -0,10857569 |  |
| 207614_s_at  | CUL1             | 4,049200824  | 4,157782885  | -0,10858206 |  |
| 1555016_at   | IL16             | -0,366776884 | -0,258114234 | -0,10866265 |  |
| 207146_at    | KRT32            | -0,366776884 | -0,258114234 | -0,10866265 |  |
| 211235_s_at  | ESR1             | -0,366776884 | -0,258114234 | -0,10866265 |  |
| 238525_at    | DDX56            | -0,366776884 | -0,258114234 | -0,10866265 |  |
| 244157_x_at  | -                | -0,366776884 | -0,258114234 | -0,10866265 |  |
| 201146_at    | NFE2L2           | 4,662153569  | 4,770829129  | -0,10867556 |  |
| 212212_s_at  | INTS1            | 1,897847661  | 2,006570641  | -0,10872298 |  |
| 203740_at    | MPHOSPH6         | 4,536342985  | 4,645113717  | -0,10877073 |  |
| 223206_s_at  | NMRAL1           | 2,482063962  | 2,590852465  | -0,1087885  |  |
| 212372_at    | MYH10            | 4,959281929  | 5,068098141  | -0,10881621 |  |
| 217775_s_at  | RDH11            | 3,827217859  | 3,936060909  | -0,10884305 |  |
| 211297_s_at  | CDK7             | 4,004232272  | 4,113143231  | -0,10891096 |  |
| 210826_x_at  | RAD17            | 2,355089531  | 2,464004877  | -0,10891535 |  |
| 212204_at    | TMEM87A          | 3,469688722  | 3,578681277  | -0,10899255 |  |
| 46947_at     | GNL3L            | 1,817557267  | 1,926554638  | -0,10899737 |  |
| 216224_s_at  | HDAC6            | 1,556829052  | 1,665902186  | -0,10907313 |  |
| 231861_at    | LRP10            | 0,30867765   | 0,417770464  | -0,10909281 |  |
| 226191_at    | GSK3B            | 3,556534813  | 3,665633845  | -0,10909903 |  |
| 224345_x_at  | FAM162A          | 5,886667294  | 5,995876925  | -0,10920963 |  |
| 34868_at     | SMG5             | 1,664457536  | 1,773706447  | -0,10924891 |  |
| 204901_at    | BTRC             | 1,261018186  | 1,370274469  | -0,10925628 |  |
| 222805_at    | MANEA            | 2,28383338   | 2,39311332   | -0,10927994 |  |
| 224886_at    | JMJD8            | 1,515954005  | 1,6252386    | -0,1092846  |  |
| 209932_s_at  | DUT              | 5,331614965  | 5,440901785  | -0,10928682 |  |
| 1569722_s_at | LOC219731        | 0,627515113  | 0,73688026   | -0,10936515 |  |
| 201595_s_at  | ZC3H15           | 4,855874606  | 4,965280257  | -0,10940565 |  |
| 1555558_at   | USP25            | -3,287237186 | -3,177802286 | -0,1094349  |  |
| 1556759_at   | -                | -3,287237186 | -3,177802286 | -0,1094349  |  |
| 1558867_at   | DSE              | -3,287237186 | -3,177802286 | -0,1094349  |  |
| 1563546_at   | -                | -3,287237186 | -3,177802286 | -0,1094349  |  |
| 1567379_at   | -                | -3,287237186 | -3,177802286 | -0,1094349  |  |
| 234489_at    | -                | -3,287237186 | -3,177802286 | -0,1094349  |  |
| 239776_at    | TMEM232          | -3,287237186 | -3,177802286 | -0,1094349  |  |
| 35156_at     | R3HCC1           | 3,433730893  | 3,543196542  | -0,10946565 |  |
| 217807_s_at  | GLTSCR2          | 6,293126875  | 6,402593025  | -0,10946615 |  |
| 209539_at    | ARHGEF6          | 5,127520718  | 5,237012352  | -0,10949163 |  |
| 202710_at    | BET1             | 3,532516649  | 3,642048499  | -0,10953185 |  |
| 238850_at    | LINC00461 /// MI | 0,695652136  | 0,805216064  | -0,10956393 |  |
| 226378_s_at  | C19orf25         | 2,745814053  | 2,855418981  | -0,10960493 |  |
| 205427_at    | ZNF354A          | 0,945567441  | 1,055274826  | -0,10970738 |  |
| 201523_x_at  | UBE2N            | 4,736009955  | 4,845746475  | -0,10973652 |  |

|              |                 |             |             |             |  |
|--------------|-----------------|-------------|-------------|-------------|--|
| 204639_at    | ADA             | 3,312571045 | 3,42231092  | -0,10973988 |  |
| 204559_s_at  | LSM7            | 6,251148107 | 6,360889963 | -0,10974186 |  |
| 203228_at    | PAFAH1B3        | 3,028064153 | 3,137910193 | -0,10984604 |  |
| 211098_x_at  | TMCO1           | 4,100998994 | 4,210848982 | -0,10984999 |  |
| 212273_x_at  | GNAS            | 6,856402969 | 6,966270851 | -0,10986788 |  |
| 223480_s_at  | MRPL47          | 5,632958831 | 5,742834983 | -0,10987615 |  |
| 219560_at    | C22orf29        | 0,822971223 | 0,932882274 | -0,10991105 |  |
| 202076_at    | BIRC2           | 3,846079118 | 3,956010056 | -0,10993094 |  |
| 203152_at    | MRPL40          | 3,498586477 | 3,608541373 | -0,1099549  |  |
| 204600_at    | EPHB3           | -0,00073712 | 0,109221392 | -0,10995851 |  |
| 211101_x_at  | LILRA2          | -0,00073712 | 0,109221392 | -0,10995851 |  |
| 231708_at    | C2CD3           | -0,00073712 | 0,109221392 | -0,10995851 |  |
| 203976_s_at  | CHAF1A          | 1,883312263 | 1,993317152 | -0,11000489 |  |
| 204615_x_at  | IDI1            | 4,280885759 | 4,390931194 | -0,11004544 |  |
| 202569_s_at  | MARK3           | 3,536237877 | 3,646288546 | -0,11005067 |  |
| 244104_at    | MGAT3           | 0,384950573 | 0,495031851 | -0,11008128 |  |
| 208836_at    | ATP1B3          | 5,554513056 | 5,66462648  | -0,11011342 |  |
| 205588_s_at  | FGFR1OP         | 3,3845211   | 3,49464046  | -0,11011936 |  |
| 1566670_at   | PDXK            | 1,104397092 | 1,214517879 | -0,11012079 |  |
| 223804_s_at  | THUMPD3         | 3,214953914 | 3,325159096 | -0,11020518 |  |
| 202414_at    | ERCC5           | 1,90937145  | 2,019703483 | -0,11033203 |  |
| 202383_at    | KDM5C           | 0,995078803 | 1,105412836 | -0,11033403 |  |
| 203333_at    | KIFAP3          | 3,225364068 | 3,335699198 | -0,11033513 |  |
| 218009_s_at  | PRC1            | 3,745192233 | 3,855584709 | -0,11039248 |  |
| 91684_g_at   | EXOSC4          | 3,560651512 | 3,671054307 | -0,1104028  |  |
| 1552657_a_at | TXNDC2          | 0,20027154  | 0,310717132 | -0,11044559 |  |
| 229467_at    | PCBP2           | 0,20027154  | 0,310717132 | -0,11044559 |  |
| 229707_at    | ZNF606          | 0,20027154  | 0,310717132 | -0,11044559 |  |
| 225756_at    | CSNK1E          | 1,247462054 | 1,3579181   | -0,11045605 |  |
| 226229_s_at  | SSU72           | 1,462198073 | 1,572742379 | -0,11054431 |  |
| 212632_at    | STX7            | 2,846658948 | 2,957221307 | -0,11056236 |  |
| 208024_s_at  | DGCR6 /// DGCR  | 1,783520648 | 1,894118818 | -0,11059817 |  |
| 201990_s_at  | CREBL2          | 0,613492853 | 0,724100169 | -0,11060732 |  |
| 217549_at    | -               | 0,613492853 | 0,724100169 | -0,11060732 |  |
| 234880_x_at  | KRTAP1-3        | 0,613492853 | 0,724100169 | -0,11060732 |  |
| 41160_at     | MBD3            | 3,130699747 | 3,241313185 | -0,11061344 |  |
| 204369_at    | PIK3CA          | 3,25727902  | 3,367892567 | -0,11061355 |  |
| 202542_s_at  | AIMP1           | 4,192270951 | 4,302892559 | -0,11062161 |  |
| 204248_at    | GNA11           | 2,683419202 | 2,794067719 | -0,11064852 |  |
| 217958_at    | MIR3656 /// TRA | 4,696231843 | 4,806881375 | -0,11064953 |  |
| 201717_at    | MRPL49          | 4,279221286 | 4,389920115 | -0,11069883 |  |
| 222157_s_at  | WDR48           | 2,097427503 | 2,208167653 | -0,11074015 |  |
| 201519_at    | TOMM70A         | 4,439816047 | 4,550556522 | -0,11074048 |  |
| 222131_x_at  | RHOT2           | 1,716223609 | 1,826973888 | -0,11075028 |  |
| 200727_s_at  | ACTR2           | 3,489018063 | 3,599822964 | -0,1108049  |  |
| 201472_at    | VBP1            | 5,538020383 | 5,648864387 | -0,110844   |  |
| 204102_s_at  | EEF2            | 7,004029386 | 7,114948236 | -0,11091885 |  |
| 206565_x_at  | SMA4            | 0,457392764 | 0,568365095 | -0,11097233 |  |
| 208466_at    | RAB3D           | 0,457392764 | 0,568365095 | -0,11097233 |  |
| 209907_s_at  | ITSN2           | 0,457392764 | 0,568365095 | -0,11097233 |  |
| 222048_at    | CRYBB2P1        | 0,457392764 | 0,568365095 | -0,11097233 |  |
| 201178_at    | FBXO7           | 4,822740409 | 4,933712985 | -0,11097258 |  |
| 213254_at    | TNRC6B          | 0,810733188 | 0,921731975 | -0,11099879 |  |
| 208081_s_at  | ZNF442          | 2,87191078  | 2,982929462 | -0,11101868 |  |
| 1555562_a_at | ZCCHC7          | 1,331241794 | 1,442269454 | -0,11102766 |  |
| 227263_at    | C8orf58         | 1,331241794 | 1,442269454 | -0,11102766 |  |

|              |                |              |              |             |  |
|--------------|----------------|--------------|--------------|-------------|--|
| 204126_s_at  | CDC45          | 2,644299732  | 2,755336312  | -0,11103658 |  |
| 222203_s_at  | NT5C1B-RDH14   | 3,436222554  | 3,547283438  | -0,11106088 |  |
| 200621_at    | CSRP1          | -0,394749123 | -0,283667828 | -0,1110813  |  |
| 208129_x_at  | LOC100506403 / | -0,394749123 | -0,283667828 | -0,1110813  |  |
| 240214_at    | RWDD1          | -0,394749123 | -0,283667828 | -0,1110813  |  |
| 32091_at     | SLC25A44       | 3,143564369  | 3,254704905  | -0,11114054 |  |
| 212832_s_at  | CKAP5          | 3,329826127  | 3,440980183  | -0,11115406 |  |
| 203033_x_at  | FH             | 4,22203305   | 4,333190402  | -0,11115735 |  |
| 1559881_s_at | ZNF12          | 1,414471577  | 1,525647381  | -0,1111758  |  |
| 231779_at    | IRAK2          | 1,414471577  | 1,525647381  | -0,1111758  |  |
| 218526_s_at  | RANGRF         | 4,204015647  | 4,31519468   | -0,11117903 |  |
| 241428_x_at  | TCEA2          | 0,928678725  | 1,039887232  | -0,11120851 |  |
| 201709_s_at  | NIPSNAP1       | 3,964046478  | 4,075277877  | -0,1112314  |  |
| 225252_at    | SRXN1          | 3,203298287  | 3,314541423  | -0,11124314 |  |
| 200066_at    | IK             | 4,018934862  | 4,130196752  | -0,11126189 |  |
| 204047_s_at  | PHACTR2        | 1,238353345  | 1,349621332  | -0,11126799 |  |
| 209368_at    | EPHX2          | 1,238353345  | 1,349621332  | -0,11126799 |  |
| 203802_x_at  | NSUN5          | 3,166555554  | 3,277845403  | -0,11128985 |  |
| 212056_at    | KIAA0182       | 1,868628927  | 1,979940779  | -0,11131185 |  |
| 222559_s_at  | RPRD1A         | 2,213529682  | 2,324919719  | -0,11139004 |  |
| 1553605_a_at | ABCA13         | -3,250025915 | -3,138626879 | -0,11139904 |  |
| 1559370_at   | DAB2           | -3,250025915 | -3,138626879 | -0,11139904 |  |
| 1567702_at   | -              | -3,250025915 | -3,138626879 | -0,11139904 |  |
| 207846_at    | POU1F1         | -3,250025915 | -3,138626879 | -0,11139904 |  |
| 216917_s_at  | SYCP1          | -3,250025915 | -3,138626879 | -0,11139904 |  |
| 217268_at    | RAB7A          | -3,250025915 | -3,138626879 | -0,11139904 |  |
| 220281_at    | SLC12A1        | -3,250025915 | -3,138626879 | -0,11139904 |  |
| 234789_at    | -              | -3,250025915 | -3,138626879 | -0,11139904 |  |
| 234996_at    | CALCRL         | -3,250025915 | -3,138626879 | -0,11139904 |  |
| 242910_x_at  | -              | -3,250025915 | -3,138626879 | -0,11139904 |  |
| 218397_at    | FANCL          | 3,844579258  | 3,956010056  | -0,1114308  |  |
| 209129_at    | TRIP6          | 3,431234921  | 3,542741726  | -0,11150681 |  |
| 37408_at     | MRC2           | 2,757019212  | 2,868544109  | -0,1115249  |  |
| 1558015_s_at | ACTR2          | 2,994644467  | 3,106248809  | -0,11160434 |  |
| 219169_s_at  | TFB1M          | 1,894952274  | 2,006570641  | -0,11161837 |  |
| 207707_s_at  | SEC13          | 5,364691951  | 5,476342482  | -0,11165053 |  |
| 204868_at    | ICT1           | 3,112743591  | 3,22439681   | -0,11165322 |  |
| 1568922_at   | SLC24A4        | -0,136301282 | -0,024572586 | -0,1117287  |  |
| 211189_x_at  | CD84           | -0,136301282 | -0,024572586 | -0,1117287  |  |
| 236069_at    | -              | -0,136301282 | -0,024572586 | -0,1117287  |  |
| 237097_at    | -              | -0,136301282 | -0,024572586 | -0,1117287  |  |
| 209232_s_at  | DCTN5          | 2,487840343  | 2,599625088  | -0,11178474 |  |
| 227122_at    | -              | 3,220746604  | 3,332545245  | -0,11179864 |  |
| 213647_at    | DNA2           | 2,446911392  | 2,558821855  | -0,11191046 |  |
| 209492_x_at  | ATP5I          | 5,67111413   | 5,783054676  | -0,11194055 |  |
| 220734_s_at  | GLTPD1         | 1,485482016  | 1,59747851   | -0,11199649 |  |
| 226927_at    | C12orf73       | 1,485482016  | 1,59747851   | -0,11199649 |  |
| 215177_s_at  | ITGA6          | 0,735041319  | 0,847075464  | -0,11203414 |  |
| 201326_at    | CCT6A          | 5,208752834  | 5,320836197  | -0,11208336 |  |
| 228315_at    | ZMAT3          | 1,596577845  | 1,708698295  | -0,11212045 |  |
| 218868_at    | ACTR3B         | 2,632180155  | 2,744302548  | -0,11212239 |  |
| 204916_at    | RAMP1          | 0,181384709  | 0,293518836  | -0,11213413 |  |
| 206725_x_at  | BMP1           | 0,181384709  | 0,293518836  | -0,11213413 |  |
| 215211_at    | RRN3P1         | 0,181384709  | 0,293518836  | -0,11213413 |  |
| 229481_at    | NKD1           | 0,181384709  | 0,293518836  | -0,11213413 |  |
| 233813_at    | PPP1R16B       | 0,181384709  | 0,293518836  | -0,11213413 |  |

|              |                 |              |              |             |  |
|--------------|-----------------|--------------|--------------|-------------|--|
| 236885_at    | MEX3A           | 0,181384709  | 0,293518836  | -0,11213413 |  |
| 202603_at    | ADAM10          | 4,403605629  | 4,515755502  | -0,11214987 |  |
| 201077_s_at  | NHP2L1          | 6,00064737   | 6,112864255  | -0,11221689 |  |
| 210908_s_at  | PFDN5           | 5,666876997  | 5,779102096  | -0,1122251  |  |
| 218579_s_at  | DHX35           | 1,699726954  | 1,811954245  | -0,11222729 |  |
| 221123_x_at  | FBXO16 /// ZNF3 | 0,917308734  | 1,029536893  | -0,11222816 |  |
| 202054_s_at  | ALDH3A2         | 1,795990708  | 1,908311039  | -0,11232033 |  |
| 242633_x_at  | ZNF75A          | 1,795990708  | 1,908311039  | -0,11232033 |  |
| 213899_at    | METAP2          | 3,529719415  | 3,642048499  | -0,11232908 |  |
| 212964_at    | HIC2            | 3,359534664  | 3,471887144  | -0,11235248 |  |
| 225669_at    | IFNAR1          | 3,36999832   | 3,482360311  | -0,11236199 |  |
| 209661_at    | KIFC3           | 0,44160593   | 0,553993624  | -0,11238769 |  |
| 230099_at    | -               | 0,44160593   | 0,553993624  | -0,11238769 |  |
| 237163_x_at  | LOC390705       | 0,44160593   | 0,553993624  | -0,11238769 |  |
| 202144_s_at  | ADSL            | 5,207586495  | 5,320040195  | -0,1124537  |  |
| 1553530_a_at | ITGB1           | 4,253455927  | 4,365953461  | -0,11249753 |  |
| 219654_at    | PTPLA           | 2,745814053  | 2,858346012  | -0,11253196 |  |
| 218694_at    | ARMCX1          | 3,729025365  | 3,841601244  | -0,11257588 |  |
| 218193_s_at  | GOLT1B          | 2,854131948  | 2,966746113  | -0,11261416 |  |
| 213413_at    | STON1           | 0,792179257  | 0,904843258  | -0,112664   |  |
| 213727_x_at  | MPPE1           | 0,792179257  | 0,904843258  | -0,112664   |  |
| 230311_s_at  | PRDM6           | 0,792179257  | 0,904843258  | -0,112664   |  |
| 224407_s_at  | MST4            | 4,886443868  | 4,999158337  | -0,11271447 |  |
| 213811_x_at  | TCF3            | 3,719237563  | 3,831954914  | -0,11271735 |  |
| 1559687_at   | TMEM221         | -0,759588698 | -0,646746079 | -0,11284262 |  |
| 203003_at    | MEF2D           | -0,759588698 | -0,646746079 | -0,11284262 |  |
| 203631_s_at  | GPRC5B          | -0,759588698 | -0,646746079 | -0,11284262 |  |
| 216807_at    | KIAA1751        | -0,759588698 | -0,646746079 | -0,11284262 |  |
| 217700_at    | CNPY4           | -0,759588698 | -0,646746079 | -0,11284262 |  |
| 221380_at    | -               | -0,759588698 | -0,646746079 | -0,11284262 |  |
| 224240_s_at  | CCL28           | -0,759588698 | -0,646746079 | -0,11284262 |  |
| 227243_s_at  | EBF3            | -0,759588698 | -0,646746079 | -0,11284262 |  |
| 230132_at    | LOC100505495    | -0,759588698 | -0,646746079 | -0,11284262 |  |
| 232189_at    | -               | -0,759588698 | -0,646746079 | -0,11284262 |  |
| 235893_at    | -               | -0,759588698 | -0,646746079 | -0,11284262 |  |
| 237166_at    | -               | -0,759588698 | -0,646746079 | -0,11284262 |  |
| 240467_at    | -               | -0,759588698 | -0,646746079 | -0,11284262 |  |
| 1555598_a_at | DUSP19          | -0,57445847  | -0,461594427 | -0,11286404 |  |
| 210140_at    | CST7            | -0,57445847  | -0,461594427 | -0,11286404 |  |
| 228483_s_at  | TAF9B           | -0,57445847  | -0,461594427 | -0,11286404 |  |
| 232336_at    | ZSWIM5          | -0,57445847  | -0,461594427 | -0,11286404 |  |
| 240912_x_at  | LINC00277       | -0,57445847  | -0,461594427 | -0,11286404 |  |
| 242008_at    | -               | -0,57445847  | -0,461594427 | -0,11286404 |  |
| 242105_at    | CCNE1           | -0,57445847  | -0,461594427 | -0,11286404 |  |
| 243058_at    | -               | -0,57445847  | -0,461594427 | -0,11286404 |  |
| 200997_at    | RBM14-RBM4 ///  | 4,924565303  | 5,037433789  | -0,11286849 |  |
| 213191_at    | TICAM1          | -0,033456564 | 0,079428135  | -0,1128847  |  |
| 220284_at    | DKKL1           | -0,033456564 | 0,079428135  | -0,1128847  |  |
| 223765_s_at  | KBTBD4          | -0,033456564 | 0,079428135  | -0,1128847  |  |
| 235245_at    | TMEM92          | -0,033456564 | 0,079428135  | -0,1128847  |  |
| 236081_at    | SNCA            | -0,033456564 | 0,079428135  | -0,1128847  |  |
| 208984_x_at  | RBM10           | 3,123915073  | 3,236821511  | -0,11290644 |  |
| 230172_at    | IFI27L1         | 2,804079361  | 2,917077481  | -0,11299812 |  |
| 215823_x_at  | PABPC1 /// RLIM | 6,687962963  | 6,800967733  | -0,11300477 |  |
| 209753_s_at  | TMPO            | 2,194816625  | 2,307890888  | -0,11307426 |  |
| 217407_x_at  | PPIL2           | 1,722769813  | 1,835911187  | -0,11314137 |  |

|              |                 |              |              |             |  |
|--------------|-----------------|--------------|--------------|-------------|--|
| 227333_at    | -               | 1,722769813  | 1,835911187  | -0,11314137 |  |
| 202847_at    | PCK2            | 2,472384965  | 2,585563171  | -0,11317821 |  |
| 225992_at    | MLLT10          | 3,002736078  | 3,116064987  | -0,11332891 |  |
| 1566557_at   | FLJ90757        | 1,305306849  | 1,418668082  | -0,11336123 |  |
| 212776_s_at  | OBSL1           | 1,348276312  | 1,461646549  | -0,11337024 |  |
| 1553645_at   | CCDC141         | -3,212234735 | -3,098858316 | -0,11337642 |  |
| 1553822_at   | RTP1            | -3,212234735 | -3,098858316 | -0,11337642 |  |
| 1554131_at   | FAM190B         | -3,212234735 | -3,098858316 | -0,11337642 |  |
| 1555578_at   | -               | -3,212234735 | -3,098858316 | -0,11337642 |  |
| 1556842_at   | LOC286087       | -3,212234735 | -3,098858316 | -0,11337642 |  |
| 1563351_at   | -               | -3,212234735 | -3,098858316 | -0,11337642 |  |
| 204704_s_at  | ALDOB           | -3,212234735 | -3,098858316 | -0,11337642 |  |
| 210906_x_at  | AQP4            | -3,212234735 | -3,098858316 | -0,11337642 |  |
| 221057_at    | SPATA1          | -3,212234735 | -3,098858316 | -0,11337642 |  |
| 231600_at    | CLEC12B         | -3,212234735 | -3,098858316 | -0,11337642 |  |
| 233261_at    | EBF1            | -3,212234735 | -3,098858316 | -0,11337642 |  |
| 238343_x_at  | -               | -3,212234735 | -3,098858316 | -0,11337642 |  |
| 243520_x_at  | ADAM30          | -3,212234735 | -3,098858316 | -0,11337642 |  |
| 244183_x_at  | PCDHB3          | -3,212234735 | -3,098858316 | -0,11337642 |  |
| 200735_x_at  | NACA            | 7,423117803  | 7,536495933  | -0,11337813 |  |
| 1555487_a_at | ACTR3B          | 1,751865623  | 1,865308541  | -0,11344292 |  |
| 238022_at    | CRNDE           | 2,014487247  | 2,127967638  | -0,11348039 |  |
| 203486_s_at  | ARMC8           | 2,580856819  | 2,694398145  | -0,11354133 |  |
| 218377_s_at  | RWDD2B          | 2,782308844  | 2,895866687  | -0,11355784 |  |
| 217984_at    | RNASET2         | 4,642435962  | 4,755995187  | -0,11355923 |  |
| 209103_s_at  | UFD1L           | 5,569231014  | 5,682800545  | -0,11356953 |  |
| 209434_s_at  | PPAT            | 3,58914411   | 3,702749166  | -0,11360506 |  |
| 209040_s_at  | PSMB8           | 2,700102307  | 2,813804482  | -0,11370218 |  |
| 202982_s_at  | ACOT1 /// ACOT  | 2,406821352  | 2,520531219  | -0,11370987 |  |
| 220956_s_at  | EGLN2 /// RAB4E | 2,406821352  | 2,520531219  | -0,11370987 |  |
| 219030_at    | TPRKB           | 5,208169782  | 5,321896852  | -0,11372707 |  |
| 230853_at    | -               | 1,210676994  | 1,324440845  | -0,11376385 |  |
| 218593_at    | RBM28           | 4,935878471  | 5,04964981   | -0,11377134 |  |
| 230937_at    | LOC285835       | 1,063722698  | 1,177496821  | -0,11377412 |  |
| 200908_s_at  | RPLP2           | 0,779676066  | 0,893473268  | -0,1137972  |  |
| 225804_at    | CYB5D2          | 0,57782909   | 0,691645685  | -0,11381659 |  |
| 235316_at    | NAT8L           | 0,57782909   | 0,691645685  | -0,11381659 |  |
| 225403_at    | RPP25L          | 3,209137871  | 3,323041804  | -0,11390393 |  |
| 208624_s_at  | EIF4G1          | 1,926486359  | 2,040470494  | -0,11398413 |  |
| 233056_x_at  | DLGAP4          | 2,520143371  | 2,634191677  | -0,11404831 |  |
| 216733_s_at  | GATM            | 2,807162789  | 2,921282473  | -0,11411968 |  |
| 218245_at    | TSKU            | 1,296557217  | 1,410714371  | -0,11415715 |  |
| 224821_at    | ABHD14B         | 1,296557217  | 1,410714371  | -0,11415715 |  |
| 216236_s_at  | SLC2A14 /// SLC | 4,527957295  | 4,642144573  | -0,11418728 |  |
| 200949_x_at  | RPS20 /// SNOR1 | 7,743301688  | 7,857524032  | -0,11422234 |  |
| 1557029_at   | -               | -1,026571149 | -0,912331589 | -0,11423956 |  |
| 1561017_at   | -               | -1,026571149 | -0,912331589 | -0,11423956 |  |
| 1561624_at   | -               | -1,026571149 | -0,912331589 | -0,11423956 |  |
| 207847_s_at  | MUC1            | -1,026571149 | -0,912331589 | -0,11423956 |  |
| 208303_s_at  | CRLF2           | -1,026571149 | -0,912331589 | -0,11423956 |  |
| 211049_at    | TLX2            | -1,026571149 | -0,912331589 | -0,11423956 |  |
| 214818_at    | CCDC57          | -1,026571149 | -0,912331589 | -0,11423956 |  |
| 220034_at    | IRAK3           | -1,026571149 | -0,912331589 | -0,11423956 |  |
| 227457_at    | DDA1            | -1,026571149 | -0,912331589 | -0,11423956 |  |
| 233692_at    | -               | -1,026571149 | -0,912331589 | -0,11423956 |  |
| 240540_at    | -               | -1,026571149 | -0,912331589 | -0,11423956 |  |

|              |                  |              |              |             |  |
|--------------|------------------|--------------|--------------|-------------|--|
| 212604_at    | MRPS31           | 3,608715137  | 3,722963534  | -0,1142484  |  |
| 212902_at    | SEC24A           | 1,835789711  | 1,950068772  | -0,11427906 |  |
| 214892_x_at  | CACTIN           | 1,835789711  | 1,950068772  | -0,11427906 |  |
| 202048_s_at  | CBX6             | 3,069741844  | 3,184136378  | -0,11439453 |  |
| 225157_at    | MLXIP            | 3,043834719  | 3,158242412  | -0,11440769 |  |
| 242538_at    | TFDP1            | 0,641402394  | 0,755840599  | -0,1144382  |  |
| 205558_at    | TRAF6            | 1,976645579  | 2,091116676  | -0,1144711  |  |
| 200051_at    | SART1            | 2,247975581  | 2,362515214  | -0,11453963 |  |
| 37425_g_at   | CCHCR1           | 0,920159643  | 1,034721344  | -0,1145617  |  |
| 1568513_x_at | -                | 2,755423794  | 2,869995113  | -0,11457132 |  |
| 227063_at    | C17orf61         | 3,130084275  | 3,244672787  | -0,11458851 |  |
| 212386_at    | TCF4             | 2,876321464  | 2,990953566  | -0,1146321  |  |
| 221766_s_at  | FAM46A           | 4,863485294  | 4,978119995  | -0,1146347  |  |
| 222195_s_at  | C9orf156         | 1,706348269  | 1,820984782  | -0,11463651 |  |
| 200679_x_at  | HMGB1            | 6,069835533  | 6,184513085  | -0,11467755 |  |
| 209929_s_at  | IKBK             | 2,027765132  | 2,14244844   | -0,11468331 |  |
| 201847_at    | LIPA /// LOC1005 | 4,531690287  | 4,646384338  | -0,11469405 |  |
| 213239_at    | PIBF1            | 1,05337236   | 1,16809119   | -0,11471883 |  |
| 207668_x_at  | PDIA6            | 5,928858179  | 6,043591098  | -0,11473292 |  |
| 224726_at    | MIB1             | 3,89689195   | 4,011627006  | -0,11473506 |  |
| 220566_at    | PIK3R5           | 0,152582607  | 0,26733076   | -0,11474815 |  |
| 241262_at    | -                | 1,493160564  | 1,60795124   | -0,11479068 |  |
| 202331_at    | BCKDHA           | 2,637386731  | 2,752192409  | -0,11480568 |  |
| 201412_at    | LRP10            | 3,41414682   | 3,529030171  | -0,11488335 |  |
| 221807_s_at  | TRABD            | 1,373456798  | 1,488344553  | -0,11488775 |  |
| 206501_x_at  | ETV1             | -0,43775896  | -0,322870281 | -0,11488868 |  |
| 212960_at    | TBC1D9           | -0,43775896  | -0,322870281 | -0,11488868 |  |
| 224937_at    | PTGFRN           | -0,43775896  | -0,322870281 | -0,11488868 |  |
| 226364_at    | HIP1             | -0,43775896  | -0,322870281 | -0,11488868 |  |
| 227218_at    | RLTPR            | -0,43775896  | -0,322870281 | -0,11488868 |  |
| 233111_at    | PTCSC1           | -0,43775896  | -0,322870281 | -0,11488868 |  |
| 235172_at    | -                | -0,43775896  | -0,322870281 | -0,11488868 |  |
| 238782_at    | -                | -0,43775896  | -0,322870281 | -0,11488868 |  |
| 216878_x_at  | HAB1             | -0,055687482 | 0,059218869  | -0,11490635 |  |
| 219257_s_at  | SPHK1            | -0,055687482 | 0,059218869  | -0,11490635 |  |
| 230470_at    | DSCR9            | -0,055687482 | 0,059218869  | -0,11490635 |  |
| 239115_at    | -                | -0,055687482 | 0,059218869  | -0,11490635 |  |
| 244759_x_at  | RNF207           | -0,055687482 | 0,059218869  | -0,11490635 |  |
| 225623_at    | KIAA1737         | 2,288253583  | 2,403170156  | -0,11491657 |  |
| 202116_at    | DPF2             | 3,821129803  | 3,936060909  | -0,11493111 |  |
| 218338_at    | PHC1             | 2,652894659  | 2,767843855  | -0,1149492  |  |
| 212152_x_at  | ARID1A           | 2,943717636  | 3,058687544  | -0,11496991 |  |
| 225172_at    | CRAMP1L          | 0,702292136  | 0,817300337  | -0,1150082  |  |
| 225690_at    | CDK12            | 2,901063789  | 3,016072743  | -0,11500895 |  |
| 210592_s_at  | SAT1             | 6,737190436  | 6,852246876  | -0,11505644 |  |
| 203715_at    | TBCE             | 2,074578432  | 2,189694216  | -0,11511578 |  |
| 205691_at    | SYNGR3           | 3,098971025  | 3,21415095   | -0,11517992 |  |
| 202664_at    | WIPF1            | 1,995690482  | 2,110887591  | -0,11519711 |  |
| 213877_x_at  | TCEB2            | 1,968405881  | 2,083632167  | -0,11522629 |  |
| 235532_at    | -                | 2,171078719  | 2,286318242  | -0,11523952 |  |
| 220355_s_at  | PBRM1            | 2,747420128  | 2,862725455  | -0,11530533 |  |
| 218401_s_at  | ZNF281           | 3,046446467  | 3,161800893  | -0,11535443 |  |
| 217809_at    | BZW2             | 5,884388161  | 5,999775868  | -0,11538771 |  |
| 213902_at    | ASAH1            | 3,889637741  | 4,005038666  | -0,11540092 |  |
| 228031_at    | TTPAL            | 3,612245157  | 3,727773127  | -0,11552797 |  |
| 232297_at    | KLHL5            | 0,760715727  | 0,876248481  | -0,11553275 |  |

|              |                 |             |              |             |  |
|--------------|-----------------|-------------|--------------|-------------|--|
| 219094_at    | ARMC8           | 1,143956113 | 1,259496994  | -0,11554088 |  |
| 218318_s_at  | NLK             | 1,446464021 | 1,562009954  | -0,11554593 |  |
| 208151_x_at  | DDX17           | 2,522021211 | 2,637603218  | -0,11558201 |  |
| 224637_at    | OST4            | 5,597222366 | 5,712826823  | -0,11560446 |  |
| 200962_at    | RPL31           | 3,474545391 | 3,590171466  | -0,11562608 |  |
| 208970_s_at  | UROD            | 5,803130623 | 5,918758117  | -0,11562749 |  |
| 1553159_at   | DNAH11          | -0,79540287 | -0,679763839 | -0,11563903 |  |
| 205316_at    | SLC15A2         | -0,79540287 | -0,679763839 | -0,11563903 |  |
| 208489_at    | GJA8            | -0,79540287 | -0,679763839 | -0,11563903 |  |
| 213957_s_at  | CEP350          | -0,79540287 | -0,679763839 | -0,11563903 |  |
| 216586_at    | -               | -0,79540287 | -0,679763839 | -0,11563903 |  |
| 220315_at    | PARP11          | -0,79540287 | -0,679763839 | -0,11563903 |  |
| 225990_at    | BOC             | -0,79540287 | -0,679763839 | -0,11563903 |  |
| 231374_at    | -               | -0,79540287 | -0,679763839 | -0,11563903 |  |
| 234757_at    | LOC100129884    | -0,79540287 | -0,679763839 | -0,11563903 |  |
| 236891_at    | -               | -0,79540287 | -0,679763839 | -0,11563903 |  |
| 240142_at    | LOC100652787    | -0,79540287 | -0,679763839 | -0,11563903 |  |
| 241707_at    | TRABD2B         | -0,79540287 | -0,679763839 | -0,11563903 |  |
| 244357_at    | -               | -0,79540287 | -0,679763839 | -0,11563903 |  |
| 225470_at    | NUP35           | 4,295231314 | 4,411005377  | -0,11577406 |  |
| 226928_x_at  | SLC25A37        | 0,555999837 | 0,67181667   | -0,11581683 |  |
| 236032_at    | -               | 0,555999837 | 0,67181667   | -0,11581683 |  |
| 201399_s_at  | TRAM1           | 4,194038762 | 4,309858816  | -0,11582005 |  |
| 224767_at    | LOC100506548 /  | 2,44295215  | 2,558821855  | -0,11586971 |  |
| 208079_s_at  | AURKA           | 5,400604403 | 5,516502956  | -0,11589855 |  |
| 222064_s_at  | AARSD1 /// PTG  | 2,422991296 | 2,538891651  | -0,11590035 |  |
| 219911_s_at  | SLCO4A1         | 2,16388051  | 2,27978304   | -0,11590253 |  |
| 223327_x_at  | AGSK1 /// LOC72 | 1,187200746 | 1,303116084  | -0,11591534 |  |
| 201555_at    | MCM3            | 4,802797334 | 4,918718462  | -0,11592113 |  |
| 235291_s_at  | FLJ32255        | 2,890927111 | 3,006869115  | -0,115942   |  |
| 222589_at    | NLK             | 3,431234921 | 3,547283438  | -0,11604852 |  |
| 218298_s_at  | C14orf159       | 1,903621061 | 2,019703483  | -0,11608242 |  |
| 212882_at    | KLHL18          | 2,623460554 | 2,739547836  | -0,11608728 |  |
| 200667_at    | UBE2D3          | 5,005651    | 5,12176409   | -0,11611309 |  |
| 226956_at    | MTMR3           | 1,037706275 | 1,153866761  | -0,11616049 |  |
| 204177_s_at  | KLHL20          | 1,689737652 | 1,805902329  | -0,11616468 |  |
| 224877_s_at  | MRPS5           | 1,689737652 | 1,805902329  | -0,11616468 |  |
| 1556709_a_at | LOC283887       | 0,317354302 | 0,433557298  | -0,116203   |  |
| 1563781_at   | LOC401320       | 0,317354302 | 0,433557298  | -0,116203   |  |
| 1564816_at   | C14orf178       | 0,317354302 | 0,433557298  | -0,116203   |  |
| 204135_at    | FILIP1L         | 0,317354302 | 0,433557298  | -0,116203   |  |
| 202589_at    | TYMS            | 6,404710205 | 6,52092312   | -0,11621292 |  |
| 201417_at    | SOX4            | 4,497501866 | 4,613845219  | -0,11634335 |  |
| 217884_at    | NAT10           | 3,367911651 | 3,484256382  | -0,11634473 |  |
| 201998_at    | ST6GAL1         | 3,857278636 | 3,973663955  | -0,11638532 |  |
| 1570185_at   | -               | 1,549482847 | 1,665902186  | -0,11641934 |  |
| 1552763_at   | TMEM67          | -3,15396682 | -3,037500868 | -0,11646595 |  |
| 1553333_at   | MAB21L3         | -3,15396682 | -3,037500868 | -0,11646595 |  |
| 1555055_at   | AVL9            | -3,15396682 | -3,037500868 | -0,11646595 |  |
| 1557468_at   | -               | -3,15396682 | -3,037500868 | -0,11646595 |  |
| 1561009_at   | MAOB            | -3,15396682 | -3,037500868 | -0,11646595 |  |
| 1563026_at   | -               | -3,15396682 | -3,037500868 | -0,11646595 |  |
| 1564405_at   | -               | -3,15396682 | -3,037500868 | -0,11646595 |  |
| 1565653_at   | HEATR7A         | -3,15396682 | -3,037500868 | -0,11646595 |  |
| 1566337_x_at | CHML            | -3,15396682 | -3,037500868 | -0,11646595 |  |
| 1568672_at   | EAF2            | -3,15396682 | -3,037500868 | -0,11646595 |  |

|              |                 |              |              |             |  |
|--------------|-----------------|--------------|--------------|-------------|--|
| 207145_at    | MSTN            | -3,15396682  | -3,037500868 | -0,11646595 |  |
| 208011_at    | PTPN22          | -3,15396682  | -3,037500868 | -0,11646595 |  |
| 210450_at    | IGHV5-78        | -3,15396682  | -3,037500868 | -0,11646595 |  |
| 215231_at    | PRKAG2          | -3,15396682  | -3,037500868 | -0,11646595 |  |
| 222342_at    | -               | -3,15396682  | -3,037500868 | -0,11646595 |  |
| 231655_x_at  | SERPINB6        | -3,15396682  | -3,037500868 | -0,11646595 |  |
| 233805_at    | -               | -3,15396682  | -3,037500868 | -0,11646595 |  |
| 234655_at    | -               | -3,15396682  | -3,037500868 | -0,11646595 |  |
| 238203_at    | -               | -3,15396682  | -3,037500868 | -0,11646595 |  |
| 238447_at    | RBMS3           | -3,15396682  | -3,037500868 | -0,11646595 |  |
| 224612_s_at  | DNAJC5          | 2,084778276  | 2,201267805  | -0,11648953 |  |
| 222850_s_at  | DNAJB14         | 1,954567604  | 2,071071048  | -0,11650344 |  |
| 217313_at    | -               | 2,292660284  | 2,409170778  | -0,11651049 |  |
| 230712_at    | NBPF1           | 1,314003737  | 1,43051703   | -0,11651329 |  |
| 214340_at    | ALOX12P2        | 0,133056859  | 0,249604176  | -0,11654732 |  |
| 242021_at    | XBP1            | 0,133056859  | 0,249604176  | -0,11654732 |  |
| 203831_at    | R3HDM2          | 1,473887017  | 1,590454215  | -0,1165672  |  |
| 225133_at    | KLF3            | 3,21379258   | 3,330438773  | -0,11664619 |  |
| 202212_at    | PES1            | 3,608715137  | 3,725370335  | -0,1166552  |  |
| 222514_at    | RRAGC           | 2,779171778  | 2,895866687  | -0,11669491 |  |
| 230139_at    | -               | 0,747935635  | 0,864649967  | -0,11671433 |  |
| 224944_at    | TMPO            | 4,715232482  | 4,832039139  | -0,11680666 |  |
| 238424_at    | ADAL            | 1,352503698  | 1,469325098  | -0,1168214  |  |
| 202407_s_at  | PRPF31          | 3,310399576  | 3,427247355  | -0,11684778 |  |
| 209534_x_at  | AKAP13          | 1,129248302  | 1,246149888  | -0,11690159 |  |
| 223034_s_at  | C1orf43         | 5,404426942  | 5,521358749  | -0,11693181 |  |
| 225282_at    | SMAP2           | 2,596981013  | 2,713921281  | -0,11694027 |  |
| 36129_at     | SGSM2           | 3,836302042  | 3,953274795  | -0,11697275 |  |
| 212622_at    | TMEM41B         | 4,140038791  | 4,257050293  | -0,11701115 |  |
| 218105_s_at  | MRPL4           | 5,974314735  | 6,091333452  | -0,11701872 |  |
| 209222_s_at  | OSBPL2          | 2,390468117  | 2,507538456  | -0,11707034 |  |
| 213145_at    | FBXL14          | 2,390468117  | 2,507538456  | -0,11707034 |  |
| 212095_s_at  | MTUS1           | 1,390002893  | 1,507116528  | -0,11711363 |  |
| 213620_s_at  | ICAM2           | 1,027166904  | 1,144305291  | -0,11713839 |  |
| 222267_at    | TMEM209         | 0,541261317  | 0,658444279  | -0,11718296 |  |
| 244062_at    | DAAM1           | 0,541261317  | 0,658444279  | -0,11718296 |  |
| 202188_at    | NUP93           | 4,306714867  | 4,423905391  | -0,11719052 |  |
| 215380_s_at  | GGCT            | 5,459847396  | 5,57705617   | -0,11720877 |  |
| 201413_at    | HSD17B4         | 3,670124012  | 3,787346121  | -0,11722211 |  |
| 1568629_s_at | PIK3R2          | 3,316904202  | 3,434130109  | -0,11722591 |  |
| 1556581_at   | ZNF778          | -0,196756757 | -0,079522948 | -0,11723381 |  |
| 1561481_at   | -               | -0,196756757 | -0,079522948 | -0,11723381 |  |
| 206722_s_at  | LPAR2           | -0,196756757 | -0,079522948 | -0,11723381 |  |
| 211174_s_at  | CCKAR           | -0,196756757 | -0,079522948 | -0,11723381 |  |
| 211781_x_at  | -               | -0,196756757 | -0,079522948 | -0,11723381 |  |
| 218362_s_at  | DIS3            | -0,196756757 | -0,079522948 | -0,11723381 |  |
| 236780_at    | -               | -0,196756757 | -0,079522948 | -0,11723381 |  |
| 1556336_at   | RBMX /// SNORD  | 0,97328325   | 1,090553537  | -0,11727029 |  |
| 206531_at    | DPF1            | 0,97328325   | 1,090553537  | -0,11727029 |  |
| 240135_x_at  | -               | 0,97328325   | 1,090553537  | -0,11727029 |  |
| 201202_at    | PCNA            | 6,607895804  | 6,725178324  | -0,11728252 |  |
| 203124_s_at  | SLC11A2         | 2,427005622  | 2,544354523  | -0,1173489  |  |
| 217118_s_at  | KIAA0930        | 2,427005622  | 2,544354523  | -0,1173489  |  |
| 218383_at    | HAUS4 /// MIR47 | 2,609398637  | 2,726791458  | -0,11739282 |  |
| 209668_x_at  | CES2            | 1,261018186  | 1,378453643  | -0,11743546 |  |
| 232001_at    | LOC439949       | 2,755423794  | 2,87289275   | -0,11746896 |  |



|              |                  |              |              |             |  |
|--------------|------------------|--------------|--------------|-------------|--|
| 225924_at    | FNIP2            | 1,64218396   | 1,759685182  | -0,11750122 |  |
| 227422_at    | STRN             | 1,64218396   | 1,759685182  | -0,11750122 |  |
| 202499_s_at  | SLC2A3           | 6,287342189  | 6,404847086  | -0,1175049  |  |
| 209810_at    | SFTPb            | -0,467091869 | -0,34958478  | -0,11750709 |  |
| 210210_at    | MPZL1            | -0,467091869 | -0,34958478  | -0,11750709 |  |
| 237772_at    | -                | -0,467091869 | -0,34958478  | -0,11750709 |  |
| 200618_at    | LASP1            | 4,414766661  | 4,532344882  | -0,11757822 |  |
| 215836_s_at  | PCDHGA1 /// PC   | 1,462198073  | 1,579853228  | -0,11765515 |  |
| 222415_at    | MLL3             | 3,191547726  | 3,309203139  | -0,11765541 |  |
| 208753_s_at  | NAP1L1           | 3,648798054  | 3,766462619  | -0,11766457 |  |
| 1564129_a_at | -                | 0,606430281  | 0,724100169  | -0,11766989 |  |
| 210783_x_at  | CLEC11A          | 0,606430281  | 0,724100169  | -0,11766989 |  |
| 202619_s_at  | PLOD2            | 2,688444421  | 2,806245339  | -0,11780092 |  |
| 215947_s_at  | FAM136A          | 4,565770118  | 4,683579237  | -0,11780912 |  |
| 201719_s_at  | EPB41L2          | 2,516380342  | 2,634191677  | -0,11781134 |  |
| 209056_s_at  | CDC5L            | 4,688310136  | 4,806123612  | -0,11781348 |  |
| 209178_at    | DHX38            | 1,119359127  | 1,23718272   | -0,11782359 |  |
| 208916_at    | SLC1A5           | 3,497632487  | 3,615478364  | -0,11784588 |  |
| 201662_s_at  | ACSL3            | 3,629766844  | 3,747642277  | -0,11787543 |  |
| 212781_at    | RBBP6            | 3,629766844  | 3,747642277  | -0,11787543 |  |
| 225409_at    | COA5             | 1,381753566  | 1,499637023  | -0,11788346 |  |
| 202924_s_at  | PLAGL2           | 0,911589958  | 1,029536893  | -0,11794693 |  |
| 219484_at    | HCFC2            | 0,911589958  | 1,029536893  | -0,11794693 |  |
| 226084_at    | MAP1B            | 0,911589958  | 1,029536893  | -0,11794693 |  |
| 234066_at    | IL1RL1           | 0,911589958  | 1,029536893  | -0,11794693 |  |
| 218070_s_at  | GMPPA            | 0,882651021  | 1,000684521  | -0,1180335  |  |
| 229773_at    | SNAP23           | 0,882651021  | 1,000684521  | -0,1180335  |  |
| 231989_s_at  | 61E3.4 /// LOC10 | 0,882651021  | 1,000684521  | -0,1180335  |  |
| 219304_s_at  | PDGFD            | -0,089689931 | 0,028364014  | -0,11805395 |  |
| 221640_s_at  | PIDD             | -0,089689931 | 0,028364014  | -0,11805395 |  |
| 226935_s_at  | CLPTM1L          | 3,964737003  | 4,082805739  | -0,11806874 |  |
| 228259_s_at  | EPB41L4A-AS1     | 1,163336153  | 1,281471383  | -0,11813523 |  |
| 212227_x_at  | EIF1             | 5,822878713  | 5,941018684  | -0,11813997 |  |
| 204281_at    | TEAD4            | 1,530951994  | 1,64909809   | -0,1181461  |  |
| 233625_x_at  | CPSF3L           | 2,566371329  | 2,684536601  | -0,11816527 |  |
| 218807_at    | VAV3             | 2,908260915  | 3,026519779  | -0,11825886 |  |
| 218900_at    | CNNM4            | 0,962260738  | 1,080561626  | -0,11830089 |  |
| 1570569_at   | -                | 0,376672223  | 0,495031851  | -0,11835963 |  |
| 215882_at    | CEP152           | 0,376672223  | 0,495031851  | -0,11835963 |  |
| 229833_at    | LOC100506713 /   | 0,376672223  | 0,495031851  | -0,11835963 |  |
| 236413_at    | -                | 0,376672223  | 0,495031851  | -0,11835963 |  |
| 224634_at    | GPATCH4          | 3,137452663  | 3,255815291  | -0,11836263 |  |
| 225934_at    | LOC148413        | 1,454352496  | 1,572742379  | -0,11838988 |  |
| 214526_x_at  | PMS2P1           | 2,546213279  | 2,664608955  | -0,11839568 |  |
| 210038_at    | PRKCQ            | 2,864529541  | 2,982929462  | -0,11839992 |  |
| 218533_s_at  | UCKL1            | 2,933877275  | 3,052311115  | -0,11843384 |  |
| 1554133_at   | RUFY2            | -3,114791413 | -2,996335703 | -0,11845571 |  |
| 1555711_x_at | -                | -3,114791413 | -2,996335703 | -0,11845571 |  |
| 1557236_at   | APOL6            | -3,114791413 | -2,996335703 | -0,11845571 |  |
| 1561362_at   | -                | -3,114791413 | -2,996335703 | -0,11845571 |  |
| 1561653_at   | -                | -3,114791413 | -2,996335703 | -0,11845571 |  |
| 1562640_at   | HOXA-AS2         | -3,114791413 | -2,996335703 | -0,11845571 |  |
| 1563825_at   | -                | -3,114791413 | -2,996335703 | -0,11845571 |  |
| 1565820_x_at | -                | -3,114791413 | -2,996335703 | -0,11845571 |  |
| 1566487_at   | -                | -3,114791413 | -2,996335703 | -0,11845571 |  |
| 1570486_at   | SOX6             | -3,114791413 | -2,996335703 | -0,11845571 |  |

|             |                |              |              |             |  |
|-------------|----------------|--------------|--------------|-------------|--|
| 204932_at   | TNFRSF11B      | -3,114791413 | -2,996335703 | -0,11845571 |  |
| 209613_s_at | ADH1B          | -3,114791413 | -2,996335703 | -0,11845571 |  |
| 216595_at   | FAM186A        | -3,114791413 | -2,996335703 | -0,11845571 |  |
| 220497_at   | ZNF214         | -3,114791413 | -2,996335703 | -0,11845571 |  |
| 233413_at   | -              | -3,114791413 | -2,996335703 | -0,11845571 |  |
| 234455_at   | ZFP1           | -3,114791413 | -2,996335703 | -0,11845571 |  |
| 237363_at   | SPATA6L        | -3,114791413 | -2,996335703 | -0,11845571 |  |
| 202245_at   | LSS            | 4,154032218  | 4,272493466  | -0,11846125 |  |
| 221657_s_at | ASB6           | 1,631786706  | 1,750261389  | -0,11847468 |  |
| 221964_at   | TULP3          | 0,728550685  | 0,847075464  | -0,11852478 |  |
| 230656_s_at | CIRH1A         | 4,480461153  | 4,599047207  | -0,11858605 |  |
| 224735_at   | CYBASC3        | 2,134723057  | 2,253342112  | -0,11861906 |  |
| 221423_s_at | YIPF5          | 2,506929603  | 2,625627364  | -0,11869776 |  |
| 227080_at   | ZNF697         | 2,59519831   | 2,713921281  | -0,11872297 |  |
| 224196_x_at | DPH5           | 3,653945107  | 3,7726819    | -0,11873679 |  |
| 212044_s_at | RPL27A         | 4,05440026   | 4,173144843  | -0,11874458 |  |
| 222311_s_at | SCAF4          | 1,331241794  | 1,450051551  | -0,11880976 |  |
| 235927_at   | XPO1           | 2,009141686  | 2,127967638  | -0,11882595 |  |
| 204228_at   | PPIH           | 4,138203514  | 4,257050293  | -0,11884678 |  |
| 217985_s_at | BAZ1A          | 3,059434754  | 3,178292062  | -0,11885731 |  |
| 212261_at   | GIGYF2         | 2,410880861  | 2,529740643  | -0,11885978 |  |
| 218894_s_at | MAGOHB         | 2,410880861  | 2,529740643  | -0,11885978 |  |
| 231735_s_at | MALAT1         | 2,410880861  | 2,529740643  | -0,11885978 |  |
| 208822_s_at | DAP3           | 5,418104823  | 5,536971059  | -0,11886624 |  |
| 200059_s_at | RHOA           | 6,670503296  | 6,789512237  | -0,11900894 |  |
| 235644_at   | CCDC138        | 1,153678675  | 1,272721751  | -0,11904308 |  |
| 226293_at   | MED19          | 2,243430036  | 2,362515214  | -0,11908518 |  |
| 209409_at   | GRB10          | 2,993291442  | 3,112391743  | -0,1191003  |  |
| 201826_s_at | SCCPDH         | 1,926486359  | 2,045615873  | -0,11912951 |  |
| 201746_at   | TP53           | 1,62481334   | 1,743944487  | -0,11913115 |  |
| 228959_at   | PDK3           | 3,520355937  | 3,639498476  | -0,11914254 |  |
| 234687_x_at | LIMD1          | 1,104397092  | 1,223626587  | -0,1192295  |  |
| 235398_at   | ZNF805         | 1,104397092  | 1,223626587  | -0,1192295  |  |
| 226584_s_at | FAM110A        | 0,841135803  | 0,960386719  | -0,11925092 |  |
| 202455_at   | HDAC5          | 0,518867317  | 0,638150376  | -0,11928306 |  |
| 203435_s_at | MME            | 0,518867317  | 0,638150376  | -0,11928306 |  |
| 206817_x_at | CELF3          | 0,518867317  | 0,638150376  | -0,11928306 |  |
| 233800_at   | -              | 0,518867317  | 0,638150376  | -0,11928306 |  |
| 208911_s_at | PDHB           | 4,173875592  | 4,293191101  | -0,11931551 |  |
| 1566690_at  | -              | 0,103263601  | 0,222599095  | -0,11933549 |  |
| 203839_s_at | TNK2           | 0,103263601  | 0,222599095  | -0,11933549 |  |
| 235948_at   | RIMKLA         | 0,103263601  | 0,222599095  | -0,11933549 |  |
| 203089_s_at | HTRA2          | 3,49093683   | 3,61027875   | -0,11934192 |  |
| 206335_at   | GALNS          | 2,750626925  | 2,869995113  | -0,11936819 |  |
| 222006_at   | LETM1          | 2,462640593  | 2,582026171  | -0,11938558 |  |
| 227545_at   | BARD1          | 2,462640593  | 2,582026171  | -0,11938558 |  |
| 213546_at   | DKFZP586I1420  | 2,303618506  | 2,423075926  | -0,11945742 |  |
| 59437_at    | C9orf116       | 0,92300493   | 1,042463255  | -0,11945832 |  |
| 36554_at    | ASMTL          | 1,936377089  | 2,055851902  | -0,11947481 |  |
| 225866_at   | RPF2           | 5,647439343  | 5,766984279  | -0,11954494 |  |
| 1554824_at  | ZNF585A        | -0,221656139 | -0,102100538 | -0,1195556  |  |
| 211181_x_at | LOC100506403 / | -0,221656139 | -0,102100538 | -0,1195556  |  |
| 211241_at   | ANXA2P3        | -0,221656139 | -0,102100538 | -0,1195556  |  |
| 205131_x_at | CLEC11A        | 1,238353345  | 1,3579181    | -0,11956476 |  |
| 214663_at   | DSTYK          | 1,238353345  | 1,3579181    | -0,11956476 |  |
| 202010_s_at | ZNF410         | 3,441193003  | 3,560823412  | -0,11963041 |  |

|              |                  |              |              |             |  |
|--------------|------------------|--------------|--------------|-------------|--|
| 226012_at    | ANKRD11          | 2,382221458  | 2,501934108  | -0,11971265 |  |
| 210427_x_at  | ANXA2            | 6,014886359  | 6,134682167  | -0,11979581 |  |
| 221479_s_at  | BNIP3L           | 4,284208955  | 4,404011141  | -0,11980219 |  |
| 203381_s_at  | APOE             | 6,861139432  | 6,980949509  | -0,11981008 |  |
| 204003_s_at  | NUPL2            | 2,400710591  | 2,520531219  | -0,11982063 |  |
| 1553566_at   | C12orf53         | -0,655928373 | -0,536087151 | -0,11984122 |  |
| 1562426_a_at | FARP1            | -0,655928373 | -0,536087151 | -0,11984122 |  |
| 1569212_at   | LOC619207        | -0,655928373 | -0,536087151 | -0,11984122 |  |
| 215370_at    | -                | -0,655928373 | -0,536087151 | -0,11984122 |  |
| 221109_at    | LOC100506571     | -0,655928373 | -0,536087151 | -0,11984122 |  |
| 229567_at    | FITM1            | -0,655928373 | -0,536087151 | -0,11984122 |  |
| 234001_s_at  | ARFGAP1          | 1,360921491  | 1,480766833  | -0,11984534 |  |
| 235366_at    | ZNF10            | 0,945567441  | 1,065442793  | -0,11987535 |  |
| 210756_s_at  | NOTCH2           | 1,04816921   | 1,16809119   | -0,11992198 |  |
| 220671_at    | CCRN4L           | 0,359971644  | 0,479907041  | -0,1199354  |  |
| 223543_at    | PDZD4            | 0,359971644  | 0,479907041  | -0,1199354  |  |
| 226330_s_at  | FAM48A           | 3,223057183  | 3,343031718  | -0,11997453 |  |
| 1559303_at   | LOC100505835     | -1,543331864 | -1,423348341 | -0,11998352 |  |
| 1564377_at   | SHANK2           | -1,543331864 | -1,423348341 | -0,11998352 |  |
| 1565849_a_at | SRRM5            | -1,543331864 | -1,423348341 | -0,11998352 |  |
| 1565929_s_at | -                | -1,543331864 | -1,423348341 | -0,11998352 |  |
| 205725_at    | SCGB1A1          | -1,543331864 | -1,423348341 | -0,11998352 |  |
| 214886_s_at  | N4BP2L1          | -1,543331864 | -1,423348341 | -0,11998352 |  |
| 215620_at    | RREB1            | -1,543331864 | -1,423348341 | -0,11998352 |  |
| 217318_x_at  | KIR2DL1 /// KIR2 | -1,543331864 | -1,423348341 | -0,11998352 |  |
| 219256_s_at  | SH3TC1           | -1,543331864 | -1,423348341 | -0,11998352 |  |
| 219659_at    | ATP8A2           | -1,543331864 | -1,423348341 | -0,11998352 |  |
| 224324_at    | MRO              | -1,543331864 | -1,423348341 | -0,11998352 |  |
| 226382_at    | CAMK1D /// LOC   | -1,543331864 | -1,423348341 | -0,11998352 |  |
| 227362_at    | SLC2A4RG         | -1,543331864 | -1,423348341 | -0,11998352 |  |
| 230587_at    | STGC3            | -1,543331864 | -1,423348341 | -0,11998352 |  |
| 231634_at    | SLC12A3          | -1,543331864 | -1,423348341 | -0,11998352 |  |
| 234703_at    | HHLA3            | -1,543331864 | -1,423348341 | -0,11998352 |  |
| 237574_at    | -                | -1,543331864 | -1,423348341 | -0,11998352 |  |
| 243637_at    | -                | -1,543331864 | -1,423348341 | -0,11998352 |  |
| 203521_s_at  | ZNF318           | 1,774096855  | 1,894118818  | -0,12002196 |  |
| 229982_at    | QSER1            | 0,648296226  | 0,768343791  | -0,12004757 |  |
| 203523_at    | LSP1             | -0,85085127  | -0,730778808 | -0,12007246 |  |
| 208183_at    | TACR3            | -0,85085127  | -0,730778808 | -0,12007246 |  |
| 215695_s_at  | GYG2             | -0,85085127  | -0,730778808 | -0,12007246 |  |
| 217696_at    | FUT7             | -0,85085127  | -0,730778808 | -0,12007246 |  |
| 221557_s_at  | LEF1             | -0,85085127  | -0,730778808 | -0,12007246 |  |
| 230480_at    | PIWIL4           | -0,85085127  | -0,730778808 | -0,12007246 |  |
| 234252_at    | -                | -0,85085127  | -0,730778808 | -0,12007246 |  |
| 235755_at    | TNRC18           | -0,85085127  | -0,730778808 | -0,12007246 |  |
| 238180_at    | -                | -0,85085127  | -0,730778808 | -0,12007246 |  |
| 242038_at    | LRRC8B           | -0,85085127  | -0,730778808 | -0,12007246 |  |
| 201742_x_at  | SRSF1            | 5,380044694  | 5,500197916  | -0,12015322 |  |
| 220885_s_at  | CENPJ            | 1,094335495  | 1,214517879  | -0,12018238 |  |
| 209923_s_at  | BRAP             | 1,859746653  | 1,979940779  | -0,12019413 |  |
| 227562_at    | LAMTOR3          | 1,859746653  | 1,979940779  | -0,12019413 |  |
| 217906_at    | KLHDC2           | 4,129607882  | 4,249823666  | -0,12021578 |  |
| 1557258_a_at | BCL10            | -0,112808516 | 0,007421914  | -0,12023043 |  |
| 213751_at    | PPP1R37          | -0,112808516 | 0,007421914  | -0,12023043 |  |
| 220106_at    | NPC1L1           | -0,112808516 | 0,007421914  | -0,12023043 |  |
| 221163_s_at  | MLXIPL           | -0,112808516 | 0,007421914  | -0,12023043 |  |

|              |                |              |              |             |  |
|--------------|----------------|--------------|--------------|-------------|--|
| 223952_x_at  | DHRS9          | -0,112808516 | 0,007421914  | -0,12023043 |  |
| 201927_s_at  | PKP4           | 1,434549838  | 1,55481039   | -0,12026055 |  |
| 202379_s_at  | NKTR           | 2,771299138  | 2,891586849  | -0,12028771 |  |
| 209126_x_at  | KRT6B          | 0,273439642  | 0,393761504  | -0,12032186 |  |
| 209387_s_at  | TM4SF1         | 3,043834719  | 3,164168347  | -0,12033363 |  |
| 201580_s_at  | TMX4           | 2,139623739  | 2,259997914  | -0,12037417 |  |
| 225261_x_at  | TH1L           | 3,992767659  | 4,113143231  | -0,12037557 |  |
| 201957_at    | PPP1R12B       | 0,82905153   | 0,949447784  | -0,12039625 |  |
| 226975_at    | RNPC3          | 0,82905153   | 0,949447784  | -0,12039625 |  |
| 200676_s_at  | UBE2L3         | 1,139070151  | 1,259496994  | -0,12042684 |  |
| 221732_at    | CANT1          | 3,479385765  | 3,599822964  | -0,1204372  |  |
| 1552487_a_at | BNC1           | -3,07502285  | -2,954576755 | -0,12044609 |  |
| 1554319_at   | RPS6KA5        | -3,07502285  | -2,954576755 | -0,12044609 |  |
| 1554460_at   | ST8SIA4        | -3,07502285  | -2,954576755 | -0,12044609 |  |
| 1559274_at   | ZNF732         | -3,07502285  | -2,954576755 | -0,12044609 |  |
| 1560130_at   | C1orf145       | -3,07502285  | -2,954576755 | -0,12044609 |  |
| 1562490_at   | THEM5          | -3,07502285  | -2,954576755 | -0,12044609 |  |
| 1562710_at   | -              | -3,07502285  | -2,954576755 | -0,12044609 |  |
| 1563061_at   | -              | -3,07502285  | -2,954576755 | -0,12044609 |  |
| 1563265_at   | -              | -3,07502285  | -2,954576755 | -0,12044609 |  |
| 1566869_at   | -              | -3,07502285  | -2,954576755 | -0,12044609 |  |
| 214389_at    | SLC5A12        | -3,07502285  | -2,954576755 | -0,12044609 |  |
| 218925_s_at  | C11orf1        | -3,07502285  | -2,954576755 | -0,12044609 |  |
| 233202_at    | CNTNAP3        | -3,07502285  | -2,954576755 | -0,12044609 |  |
| 233662_at    | CDH26          | -3,07502285  | -2,954576755 | -0,12044609 |  |
| 235771_at    | -              | -3,07502285  | -2,954576755 | -0,12044609 |  |
| 237863_at    | TMPO           | -3,07502285  | -2,954576755 | -0,12044609 |  |
| 237874_at    | -              | -3,07502285  | -2,954576755 | -0,12044609 |  |
| 240480_at    | TINAG          | -3,07502285  | -2,954576755 | -0,12044609 |  |
| 244016_at    | -              | -3,07502285  | -2,954576755 | -0,12044609 |  |
| 244613_at    | -              | -3,07502285  | -2,954576755 | -0,12044609 |  |
| 222618_at    | SMU1           | 1,912238072  | 2,032717854  | -0,12047978 |  |
| 235359_at    | LRRC33         | 3,217273782  | 3,337798009  | -0,12052423 |  |
| 200702_s_at  | DDX24          | 3,532516649  | 3,653046807  | -0,12053016 |  |
| 222275_at    | MRPS30         | 1,937784532  | 2,058399602  | -0,12061507 |  |
| 216806_at    | -              | 1,504602299  | 1,6252386    | -0,1206363  |  |
| 210757_x_at  | DAB2           | 2,976955384  | 3,09760452   | -0,12064914 |  |
| 211651_s_at  | LAMB1          | 1,269985355  | 1,390636111  | -0,12065076 |  |
| 238412_at    | RRN3P3         | 1,269985355  | 1,390636111  | -0,12065076 |  |
| 208639_x_at  | PDIA6          | 5,943469614  | 6,064177954  | -0,12070834 |  |
| 241720_at    | ZNF326         | 0,503742507  | 0,624460759  | -0,12071825 |  |
| 203213_at    | CDK1           | 4,90958085   | 5,030313788  | -0,12073294 |  |
| 209250_at    | DEGS1          | 3,824937847  | 3,945725977  | -0,12078813 |  |
| 213189_at    | MINA           | 1,607231019  | 1,728030156  | -0,12079914 |  |
| 222394_at    | PDCD6IP        | 2,26825514   | 2,389070873  | -0,12081573 |  |
| 201154_x_at  | RPL4 /// SNORD | 7,282311783  | 7,403171043  | -0,12085926 |  |
| 1553009_s_at | REXO1L1        | -1,131062212 | -1,010192375 | -0,12086984 |  |
| 1553702_at   | ZNF697         | -1,131062212 | -1,010192375 | -0,12086984 |  |
| 1559691_at   | -              | -1,131062212 | -1,010192375 | -0,12086984 |  |
| 1562330_s_at | CSMD1          | -1,131062212 | -1,010192375 | -0,12086984 |  |
| 1562748_at   | LOC253044      | -1,131062212 | -1,010192375 | -0,12086984 |  |
| 205901_at    | PNOC           | -1,131062212 | -1,010192375 | -0,12086984 |  |
| 224003_at    | NCRNA00185 /// | -1,131062212 | -1,010192375 | -0,12086984 |  |
| 226788_at    | CENPT          | -1,131062212 | -1,010192375 | -0,12086984 |  |
| 227870_at    | IGDCC4         | -1,131062212 | -1,010192375 | -0,12086984 |  |
| 228871_at    | ALG14          | -1,131062212 | -1,010192375 | -0,12086984 |  |

|              |                  |              |              |             |  |
|--------------|------------------|--------------|--------------|-------------|--|
| 229427_at    | SEMA5A           | -1,131062212 | -1,010192375 | -0,12086984 |  |
| 230552_at    | LOC100134317 /   | -1,131062212 | -1,010192375 | -0,12086984 |  |
| 231624_s_at  | -                | -1,131062212 | -1,010192375 | -0,12086984 |  |
| 235090_at    | ZNF710           | -1,131062212 | -1,010192375 | -0,12086984 |  |
| 238857_at    | ATE1             | -1,131062212 | -1,010192375 | -0,12086984 |  |
| 240577_at    | TRAF3IP2-AS1     | -1,131062212 | -1,010192375 | -0,12086984 |  |
| 240696_at    | -                | -1,131062212 | -1,010192375 | -0,12086984 |  |
| 243314_at    | -                | -1,131062212 | -1,010192375 | -0,12086984 |  |
| 213123_at    | MFAP3            | 2,734521183  | 2,855418981  | -0,1208978  |  |
| 218275_at    | SLC25A10         | 0,934330293  | 1,055274826  | -0,12094453 |  |
| 219219_at    | TMEM160          | 3,702775533  | 3,823741953  | -0,12096642 |  |
| 224518_s_at  | ZNF559           | 3,049053496  | 3,170070041  | -0,12101655 |  |
| 212032_s_at  | PTOV1            | 3,562021138  | 3,683073218  | -0,12105208 |  |
| 212448_at    | NEDD4L           | 0,57058931   | 0,691645685  | -0,12105638 |  |
| 203230_at    | DVL1             | 1,932146506  | 2,053299695  | -0,12115319 |  |
| 203660_s_at  | PCNT             | 4,820834741  | 4,942014748  | -0,12118001 |  |
| 213690_s_at  | -                | 0,083054335  | 0,204310755  | -0,12125642 |  |
| 213833_x_at  | NOP16            | 0,083054335  | 0,204310755  | -0,12125642 |  |
| 226717_at    | LRTOMT           | 0,083054335  | 0,204310755  | -0,12125642 |  |
| 229793_at    | ASAH2B           | 0,083054335  | 0,204310755  | -0,12125642 |  |
| 241748_x_at  | DGCR14           | 0,083054335  | 0,204310755  | -0,12125642 |  |
| 219675_s_at  | UXS1             | 1,699726954  | 1,820984782  | -0,12125783 |  |
| 210092_at    | MAGOH            | 3,950863319  | 4,072129637  | -0,12126632 |  |
| 209533_s_at  | PLAA             | 3,345817457  | 3,467101363  | -0,12128391 |  |
| 212361_s_at  | ATP2A2           | 2,568189989  | 2,689475799  | -0,12128581 |  |
| 209065_at    | UQCRB            | 3,117719377  | 3,239069096  | -0,12134972 |  |
| 221675_s_at  | CHPT1            | 2,861566439  | 2,982929462  | -0,12136302 |  |
| 218103_at    | FTSJ3            | 3,737131445  | 3,858511405  | -0,12137996 |  |
| 209136_s_at  | USP10            | 1,982112682  | 2,103505212  | -0,12139253 |  |
| 210093_s_at  | MAGOH            | 4,303988967  | 4,425386458  | -0,12139749 |  |
| 227869_at    | FAM104B /// LOC  | 2,64946283   | 2,770953871  | -0,12149104 |  |
| 214949_at    | -                | 3,599852114  | 3,721356767  | -0,12150465 |  |
| 231835_at    | FAM213B          | 2,696781084  | 2,81832103   | -0,12153995 |  |
| 32836_at     | AGPAT1           | 3,073588098  | 3,195175772  | -0,12158767 |  |
| 213813_x_at  | -                | 1,079110292  | 1,200746069  | -0,12163578 |  |
| 227977_at    | ZADH2            | 1,079110292  | 1,200746069  | -0,12163578 |  |
| 1558124_at   | NUDCD2           | -0,512251684 | -0,39061235  | -0,12163933 |  |
| 200637_s_at  | PTPRF            | -0,512251684 | -0,39061235  | -0,12163933 |  |
| 221131_at    | A4GNT            | -0,512251684 | -0,39061235  | -0,12163933 |  |
| 232015_at    | FAM59B           | -0,512251684 | -0,39061235  | -0,12163933 |  |
| 239982_at    | -                | -0,512251684 | -0,39061235  | -0,12163933 |  |
| 217509_x_at  | GRIK5            | 0,695652136  | 0,817300337  | -0,1216482  |  |
| 239946_at    | -                | 0,695652136  | 0,817300337  | -0,1216482  |  |
| 1556755_s_at | LOC286149        | 0,171847695  | 0,293518836  | -0,12167114 |  |
| 212848_s_at  | C9orf3 /// LOC10 | 0,171847695  | 0,293518836  | -0,12167114 |  |
| 229865_at    | FNDC3B           | 0,171847695  | 0,293518836  | -0,12167114 |  |
| 236369_at    | TSPY26P          | 0,171847695  | 0,293518836  | -0,12167114 |  |
| 226078_at    | RPUSD1           | 1,215326747  | 1,337086025  | -0,12175928 |  |
| 201633_s_at  | CYB5B            | 2,596981013  | 2,718761062  | -0,12178005 |  |
| 202478_at    | TRIB2            | 3,455019843  | 3,576905405  | -0,12188556 |  |
| 209337_at    | PSIP1            | 3,288503211  | 3,410394103  | -0,12189089 |  |
| 209015_s_at  | DNAJB6           | 3,612245157  | 3,734161076  | -0,12191592 |  |
| 1554646_at   | OSBPL1A          | 0,255492549  | 0,377530647  | -0,1220381  |  |
| 215765_at    | LRRC41           | 0,255492549  | 0,377530647  | -0,1220381  |  |
| 230629_s_at  | EP400            | 0,255492549  | 0,377530647  | -0,1220381  |  |
| 242341_x_at  | GLYCTK           | 0,255492549  | 0,377530647  | -0,1220381  |  |

|              |                 |              |              |             |  |
|--------------|-----------------|--------------|--------------|-------------|--|
| 213233_s_at  | KLHL9           | 3,691139316  | 3,813221015  | -0,1220817  |  |
| 200832_s_at  | SCD             | 5,561947848  | 5,684038418  | -0,12209057 |  |
| 221629_x_at  | FAM203A         | 1,751865623  | 1,874012195  | -0,12214657 |  |
| 210966_x_at  | LARP1           | 2,908260915  | 3,030417996  | -0,12215708 |  |
| 1557684_at   | ZNF286A         | 1,414471577  | 1,536652708  | -0,12218113 |  |
| 203573_s_at  | RABGGTA         | 1,414471577  | 1,536652708  | -0,12218113 |  |
| 224562_at    | WASF2           | 3,394805732  | 3,517040489  | -0,12223476 |  |
| 217825_s_at  | UBE2J1          | 2,640847372  | 2,763166224  | -0,12231885 |  |
| 222256_s_at  | JMJD7 /// JMJD7 | 0,334552598  | 0,456918297  | -0,1223657  |  |
| 227182_at    | SUSD3           | 0,334552598  | 0,456918297  | -0,1223657  |  |
| 227424_x_at  | C21orf119       | 1,485482016  | 1,60795124   | -0,12246922 |  |
| 1553222_at   | OXER1           | 1,835789711  | 1,958277216  | -0,12248751 |  |
| 208447_s_at  | PRPS1           | 3,372081975  | 3,49464046   | -0,12255849 |  |
| 203036_s_at  | MTSS1           | 2,520143371  | 2,64270545   | -0,12256208 |  |
| 210027_s_at  | APEX1           | 6,037052141  | 6,159664462  | -0,12261232 |  |
| 209838_at    | COPS2           | 1,621313976  | 1,743944487  | -0,12263051 |  |
| 201502_s_at  | NFKBIA          | 1,889144008  | 2,011838132  | -0,12269412 |  |
| 203871_at    | SENP3           | 2,652894659  | 2,775606361  | -0,1227117  |  |
| 217932_at    | MRPS7           | 3,901227032  | 4,024062565  | -0,12283553 |  |
| 210501_x_at  | EIF3K           | 6,498000306  | 6,620883806  | -0,1228835  |  |
| 202157_s_at  | CELF2           | 5,241318265  | 5,364210922  | -0,12289266 |  |
| 212087_s_at  | ERAL1           | 2,089851283  | 2,212749286  | -0,122898   |  |
| 228075_x_at  | TFB1M           | 2,089851283  | 2,212749286  | -0,122898   |  |
| 232092_at    | SLC25A51        | 0,480753764  | 0,603679647  | -0,12292588 |  |
| 237607_at    | -               | 0,480753764  | 0,603679647  | -0,12292588 |  |
| 212922_s_at  | SMYD2           | 3,525045272  | 3,647981081  | -0,12293581 |  |
| 201867_s_at  | TBL1X           | 0,682279745  | 0,805216064  | -0,12293632 |  |
| 207605_x_at  | ZNF117          | 0,682279745  | 0,805216064  | -0,12293632 |  |
| 222692_s_at  | FNDC3B          | 0,682279745  | 0,805216064  | -0,12293632 |  |
| 229717_at    | AMIGO3 /// GMP  | 0,682279745  | 0,805216064  | -0,12293632 |  |
| 212540_at    | CDC34           | 3,551027544  | 3,673964604  | -0,12293706 |  |
| 1566917_at   | HPYR1           | -0,888496123 | -0,765504029 | -0,12299209 |  |
| 204534_at    | VTN             | -0,888496123 | -0,765504029 | -0,12299209 |  |
| 211313_s_at  | BAZ1B           | -0,888496123 | -0,765504029 | -0,12299209 |  |
| 215328_at    | EFR3B           | -0,888496123 | -0,765504029 | -0,12299209 |  |
| 215419_at    | ZFR2            | -0,888496123 | -0,765504029 | -0,12299209 |  |
| 231564_at    | -               | -0,888496123 | -0,765504029 | -0,12299209 |  |
| 233276_at    | -               | -0,888496123 | -0,765504029 | -0,12299209 |  |
| 240092_at    | -               | -0,888496123 | -0,765504029 | -0,12299209 |  |
| 240686_x_at  | TFRC            | -0,888496123 | -0,765504029 | -0,12299209 |  |
| 242864_at    | ZNF554          | -0,888496123 | -0,765504029 | -0,12299209 |  |
| 201590_x_at  | ANXA2           | 5,927441997  | 6,050486076  | -0,12304408 |  |
| 204168_at    | MGST2           | 5,354716535  | 5,477770711  | -0,12305418 |  |
| 225116_at    | HIPK2           | 3,822654227  | 3,945725977  | -0,12307175 |  |
| 222649_at    | XPO4            | 3,146001821  | 3,269073685  | -0,12307186 |  |
| 200887_s_at  | STAT1           | 4,898781575  | 5,021853686  | -0,12307211 |  |
| 225682_s_at  | POLR3H          | 2,566371329  | 2,689475799  | -0,12310447 |  |
| 215744_at    | FUS             | -0,259832361 | -0,136643983 | -0,12318838 |  |
| 224818_at    | SORT1           | 0,798390451  | 0,921731975  | -0,12334152 |  |
| 227641_at    | FBXL16          | 0,798390451  | 0,921731975  | -0,12334152 |  |
| 201210_at    | DDX3X           | 6,540769892  | 6,664127497  | -0,1233576  |  |
| 1559544_s_at | LINC00441       | -1,173767127 | -1,050406615 | -0,12336051 |  |
| 1561671_at   | LOC286121       | -1,173767127 | -1,050406615 | -0,12336051 |  |
| 211826_s_at  | AFF1            | -1,173767127 | -1,050406615 | -0,12336051 |  |
| 217160_at    | TSPY1           | -1,173767127 | -1,050406615 | -0,12336051 |  |
| 224588_at    | XIST            | -1,173767127 | -1,050406615 | -0,12336051 |  |

|              |                   |              |              |             |  |
|--------------|-------------------|--------------|--------------|-------------|--|
| 232987_at    | ARL17A /// ARL1   | -1,173767127 | -1,050406615 | -0,12336051 |  |
| 233370_at    | -                 | -1,173767127 | -1,050406615 | -0,12336051 |  |
| 233816_at    | -                 | -1,173767127 | -1,050406615 | -0,12336051 |  |
| 234003_at    | ENOX2             | -1,173767127 | -1,050406615 | -0,12336051 |  |
| 242619_x_at  | -                 | -1,173767127 | -1,050406615 | -0,12336051 |  |
| 203947_at    | CSTF3             | 4,693318378  | 4,816696246  | -0,12337787 |  |
| 203558_at    | CUL7              | 0,613492853  | 0,73688026   | -0,12338741 |  |
| 225547_at    | SNHG6 /// SNOR    | 6,778817837  | 6,902209014  | -0,12339118 |  |
| 222685_at    | HAUS6             | 4,060873315  | 4,18426834   | -0,12339502 |  |
| 221620_s_at  | APOO              | 3,636716366  | 3,760216412  | -0,12350005 |  |
| 227542_at    | SOCS6             | 0,853119696  | 0,976641161  | -0,12352147 |  |
| 1553277_at   | RTTN              | -3,013665402 | -2,89013181  | -0,12353359 |  |
| 1554932_at   | ZSWIM2            | -3,013665402 | -2,89013181  | -0,12353359 |  |
| 1556497_a_at | -                 | -3,013665402 | -2,89013181  | -0,12353359 |  |
| 1556867_at   | -                 | -3,013665402 | -2,89013181  | -0,12353359 |  |
| 1560197_at   | ZC2HC1A           | -3,013665402 | -2,89013181  | -0,12353359 |  |
| 1560959_a_at | -                 | -3,013665402 | -2,89013181  | -0,12353359 |  |
| 208263_at    | SRP72             | -3,013665402 | -2,89013181  | -0,12353359 |  |
| 211479_s_at  | HTR2C             | -3,013665402 | -2,89013181  | -0,12353359 |  |
| 214974_x_at  | CXCL5             | -3,013665402 | -2,89013181  | -0,12353359 |  |
| 217528_at    | CLCA2             | -3,013665402 | -2,89013181  | -0,12353359 |  |
| 224199_at    | DKK2              | -3,013665402 | -2,89013181  | -0,12353359 |  |
| 231397_at    | LPPR5             | -3,013665402 | -2,89013181  | -0,12353359 |  |
| 231455_at    | LINC00487         | -3,013665402 | -2,89013181  | -0,12353359 |  |
| 233039_at    | -                 | -3,013665402 | -2,89013181  | -0,12353359 |  |
| 233373_at    | -                 | -3,013665402 | -2,89013181  | -0,12353359 |  |
| 236028_at    | IBSP              | -3,013665402 | -2,89013181  | -0,12353359 |  |
| 239178_at    | FGF9              | -3,013665402 | -2,89013181  | -0,12353359 |  |
| 239605_x_at  | -                 | -3,013665402 | -2,89013181  | -0,12353359 |  |
| 240413_at    | PYHIN1            | -3,013665402 | -2,89013181  | -0,12353359 |  |
| 244318_at    | -                 | -3,013665402 | -2,89013181  | -0,12353359 |  |
| 212089_at    | LMNA              | 1,473887017  | 1,59747851   | -0,12359149 |  |
| 1558648_at   | C15orf57          | -0,148196756 | -0,024572586 | -0,12362417 |  |
| 202608_s_at  | NDST1             | -0,148196756 | -0,024572586 | -0,12362417 |  |
| 217517_x_at  | SRPK2             | -0,148196756 | -0,024572586 | -0,12362417 |  |
| 232525_at    | -                 | -0,148196756 | -0,024572586 | -0,12362417 |  |
| 203274_at    | F8A1 /// F8A2 /// | 3,139900454  | 3,263564154  | -0,1236637  |  |
| 37547_at     | BBS9              | -2,80114737  | -2,677460985 | -0,12368638 |  |
| 208152_s_at  | DDX21             | 5,954722974  | 6,078447312  | -0,12372434 |  |
| 217028_at    | CXCR4             | 1,542099044  | 1,665902186  | -0,12380314 |  |
| 224288_x_at  | FKSG49            | 1,191926657  | 1,315948728  | -0,12402207 |  |
| 201204_s_at  | RRBP1             | 2,589836943  | 2,713921281  | -0,12408434 |  |
| 201209_at    | HDAC1             | 4,783357765  | 4,907457724  | -0,12409996 |  |
| 201310_s_at  | NREP              | 3,685285822  | 3,809444866  | -0,12415904 |  |
| 209140_x_at  | HLA-B             | 6,526049602  | 6,650261154  | -0,12421155 |  |
| 202174_s_at  | PCM1              | 5,608865072  | 5,733100797  | -0,12423573 |  |
| 1556274_at   | -                 | 0,052199481  | 0,176436073  | -0,12423659 |  |
| 209880_s_at  | SELPLG            | 0,052199481  | 0,176436073  | -0,12423659 |  |
| 210880_s_at  | EFS               | 0,052199481  | 0,176436073  | -0,12423659 |  |
| 218902_at    | NOTCH1            | 0,052199481  | 0,176436073  | -0,12423659 |  |
| 243992_at    | -                 | 0,052199481  | 0,176436073  | -0,12423659 |  |
| 227003_at    | RAB28             | 3,03990821   | 3,164168347  | -0,12426014 |  |
| 218459_at    | TOR3A             | 3,95851035   | 4,082805739  | -0,12429539 |  |
| 209725_at    | UTP20             | 2,845159691  | 2,969455976  | -0,12429628 |  |
| 213572_s_at  | SERPINB1          | 3,475514766  | 3,599822964  | -0,1243082  |  |
| 222279_at    | HLA-F-AS1         | 2,392522438  | 2,516830926  | -0,12430849 |  |

|              |            |              |             |             |  |
|--------------|------------|--------------|-------------|-------------|--|
| 223743_s_at  | MRPL4      | 5,42765285   | 5,551964308 | -0,12431146 |  |
| 221214_s_at  | NELF       | 1,46610492   | 1,590454215 | -0,1243493  |  |
| 201014_s_at  | PAICS      | 5,23646577   | 5,360860774 | -0,124395   |  |
| 226412_at    | PNISR      | 3,097712429  | 3,222126232 | -0,1244138  |  |
| 214431_at    | GMPS       | 4,505354197  | 4,629778322 | -0,12442413 |  |
| 228826_at    | BZRAP1-AS1 | 2,963199262  | 3,087661492 | -0,12446223 |  |
| 1552549_a_at | BSND       | -0,543051993 | -0,41858459 | -0,1244674  |  |
| 1554094_at   | ENTPD5     | -0,543051993 | -0,41858459 | -0,1244674  |  |
| 1566475_at   | -          | -0,543051993 | -0,41858459 | -0,1244674  |  |
| 212413_at    | 38961      | -0,543051993 | -0,41858459 | -0,1244674  |  |
| 213676_at    | TMEM151B   | -0,543051993 | -0,41858459 | -0,1244674  |  |
| 216817_s_at  | OR2H1      | -0,543051993 | -0,41858459 | -0,1244674  |  |
| 216949_s_at  | PKD1       | -0,543051993 | -0,41858459 | -0,1244674  |  |
| 226627_at    | 39692      | -0,543051993 | -0,41858459 | -0,1244674  |  |
| 236619_at    | -          | -0,543051993 | -0,41858459 | -0,1244674  |  |
| 241916_at    | -          | -0,543051993 | -0,41858459 | -0,1244674  |  |
| 244237_at    | FLJ90680   | -0,543051993 | -0,41858459 | -0,1244674  |  |
| 226892_at    | C10orf12   | 3,712675274  | 3,837157105 | -0,12448183 |  |
| 208678_at    | ATP6V1E1   | 4,764842601  | 4,889327253 | -0,12448465 |  |
| 215157_x_at  | PABPC1     | 7,652948975  | 7,777444519 | -0,12449554 |  |
| 238436_s_at  | ZNF805     | 1,534677255  | 1,659204017 | -0,12452676 |  |
| 206174_s_at  | PPP6C      | 3,821129803  | 3,945725977 | -0,12459617 |  |
| 204413_at    | TRAF2      | 0,533835206  | 0,658444279 | -0,12460907 |  |
| 232907_at    | UBR4       | 0,533835206  | 0,658444279 | -0,12460907 |  |
| 1555372_at   | BCL2L11    | 1,567778694  | 1,692388143 | -0,12460945 |  |
| 205219_s_at  | GALK2      | 1,567778694  | 1,692388143 | -0,12460945 |  |
| 219683_at    | FZD3       | 1,567778694  | 1,692388143 | -0,12460945 |  |
| 232050_at    | FLJ42627   | 1,567778694  | 1,692388143 | -0,12460945 |  |
| 235634_at    | PURG       | 1,567778694  | 1,692388143 | -0,12460945 |  |
| 208818_s_at  | COMT       | 2,726400382  | 2,851017268 | -0,12461689 |  |
| 200917_s_at  | SRPR       | 1,726031811  | 1,85068474  | -0,12465293 |  |
| 220396_at    | SLC35E3    | 0,228146222  | 0,352836757 | -0,12469054 |  |
| 205963_s_at  | DNAJA3     | 3,117719377  | 3,242433922 | -0,12471454 |  |
| 235227_at    | STXBP5     | 3,574742007  | 3,69948842  | -0,12474641 |  |
| 230252_at    | LPAR5      | 3,724955181  | 3,849713445 | -0,12475826 |  |
| 238701_x_at  | C11orf92   | 4,591035503  | 4,71581024  | -0,12477474 |  |
| 209116_x_at  | HBB        | 5,271491396  | 5,396284726 | -0,12479333 |  |
| 219215_s_at  | SLC39A4    | 3,693640704  | 3,818491075 | -0,12485037 |  |
| 204585_s_at  | L1CAM      | 0,30867765   | 0,433557298 | -0,12487965 |  |
| 230502_s_at  | -          | 0,30867765   | 0,433557298 | -0,12487965 |  |
| 219168_s_at  | PRR5       | 0,661985843  | 0,786897721 | -0,12491188 |  |
| 234992_x_at  | ECT2       | 0,661985843  | 0,786897721 | -0,12491188 |  |
| 201649_at    | UBE2L6     | 4,149180318  | 4,274138329 | -0,12495801 |  |
| 218585_s_at  | DTL        | 3,852063011  | 3,977034308 | -0,1249713  |  |
| 205266_at    | LIF        | 1,224581536  | 1,349621332 | -0,1250398  |  |
| 211937_at    | EIF4B      | 4,360703168  | 4,485783875 | -0,12508071 |  |
| 203375_s_at  | TPP2       | 3,765941908  | 3,891034012 | -0,1250921  |  |
| 201011_at    | RPN1       | 4,937286399  | 5,062398002 | -0,1251116  |  |
| 217766_s_at  | TMEM50A    | 3,659926886  | 3,785040604 | -0,12511372 |  |
| 202113_s_at  | SNX2       | 4,036776538  | 4,161934914 | -0,12515838 |  |
| 206686_at    | PDK1       | 0,779676066  | 0,904843258 | -0,12516719 |  |
| 224951_at    | CERS5      | 3,325531666  | 3,450709925 | -0,12517826 |  |
| 214913_at    | ADAMTS3    | 3,602516743  | 3,727773127 | -0,12525638 |  |
| 226000_at    | CTTNBP2NL  | 1,560488174  | 1,685812099 | -0,12532393 |  |
| 202140_s_at  | CLK3       | 2,178241192  | 2,303602088 | -0,1253609  |  |
| 217547_x_at  | ZNF675     | 0,888485433  | 1,013870809 | -0,12538538 |  |



|              |                   |              |              |             |  |
|--------------|-------------------|--------------|--------------|-------------|--|
| 205634_x_at  | ZDHC24            | 1,177702228  | 1,303116084  | -0,12541386 |  |
| 201126_s_at  | MGAT1             | 2,559073676  | 2,684536601  | -0,12546292 |  |
| 1552760_at   | HDAC9             | -2,972500237 | -2,847001814 | -0,12549842 |  |
| 1555214_a_at | CLEC7A            | -2,972500237 | -2,847001814 | -0,12549842 |  |
| 1556331_a_at | -                 | -2,972500237 | -2,847001814 | -0,12549842 |  |
| 1557698_at   | -                 | -2,972500237 | -2,847001814 | -0,12549842 |  |
| 1562611_at   | -                 | -2,972500237 | -2,847001814 | -0,12549842 |  |
| 1564128_at   | -                 | -2,972500237 | -2,847001814 | -0,12549842 |  |
| 1568012_at   | CLIP1             | -2,972500237 | -2,847001814 | -0,12549842 |  |
| 1570552_at   | -                 | -2,972500237 | -2,847001814 | -0,12549842 |  |
| 206070_s_at  | EPHA3             | -2,972500237 | -2,847001814 | -0,12549842 |  |
| 206422_at    | GCG               | -2,972500237 | -2,847001814 | -0,12549842 |  |
| 211646_at    | IGH@ /// IGHA1 /  | -2,972500237 | -2,847001814 | -0,12549842 |  |
| 220170_at    | FHL5              | -2,972500237 | -2,847001814 | -0,12549842 |  |
| 220205_at    | TPTE              | -2,972500237 | -2,847001814 | -0,12549842 |  |
| 229095_s_at  | LIMS3 /// LIMS3-I | -2,972500237 | -2,847001814 | -0,12549842 |  |
| 231499_s_at  | -                 | -2,972500237 | -2,847001814 | -0,12549842 |  |
| 233183_at    | SLC4A9            | -2,972500237 | -2,847001814 | -0,12549842 |  |
| 237850_at    | -                 | -2,972500237 | -2,847001814 | -0,12549842 |  |
| 239089_at    | -                 | -2,972500237 | -2,847001814 | -0,12549842 |  |
| 242819_at    | -                 | -2,972500237 | -2,847001814 | -0,12549842 |  |
| 243764_at    | VSIG1             | -2,972500237 | -2,847001814 | -0,12549842 |  |
| 244021_at    | -                 | -2,972500237 | -2,847001814 | -0,12549842 |  |
| 218644_at    | PLEK2             | 1,454352496  | 1,579853228  | -0,12550073 |  |
| 204145_at    | FRG1 /// LOC100   | 4,208686884  | 4,334242016  | -0,12555513 |  |
| 1556059_s_at | SPEN              | 1,859746653  | 1,98530622   | -0,12555957 |  |
| 208699_x_at  | TKT               | 3,647078281  | 3,7726819    | -0,12560362 |  |
| 223187_s_at  | ORMDL1            | 4,055697197  | 4,181349409  | -0,12565221 |  |
| 221855_at    | SDHAF1            | 4,073092675  | 4,198775061  | -0,12568239 |  |
| 208371_s_at  | RING1             | 2,68509622   | 2,810785576  | -0,12568936 |  |
| 208724_s_at  | RAB1A             | 6,016885296  | 6,142582604  | -0,12569731 |  |
| 243561_at    | -                 | -0,285837228 | -0,160136748 | -0,12570048 |  |
| 205021_s_at  | FOXN3             | 1,774096855  | 1,899812471  | -0,12571562 |  |
| 216304_x_at  | YME1L1            | 5,003636425  | 5,129356802  | -0,12572038 |  |
| 229860_x_at  | C4orf48           | 3,279650757  | 3,405399563  | -0,12574881 |  |
| 202349_at    | TOR1A             | 2,758612869  | 2,884425449  | -0,12581258 |  |
| 205270_s_at  | LCP2              | 2,485917452  | 2,611817827  | -0,12590037 |  |
| 235241_at    | SLC38A9           | 2,485917452  | 2,611817827  | -0,12590037 |  |
| 213291_s_at  | UBE3A             | 3,835547208  | 3,96146507   | -0,12591786 |  |
| 1555419_a_at | ASAH1             | 4,520462208  | 4,646384338  | -0,12592213 |  |
| 210821_x_at  | CENPA             | 2,503131904  | 2,629059192  | -0,12592729 |  |
| 202658_at    | PEX11B            | 2,520143371  | 2,646096941  | -0,12595357 |  |
| 1562408_at   | -                 | -0,172274514 | -0,046302147 | -0,12597237 |  |
| 209446_s_at  | -                 | -0,172274514 | -0,046302147 | -0,12597237 |  |
| 214506_at    | GPR182            | -0,172274514 | -0,046302147 | -0,12597237 |  |
| 218232_at    | C1QA              | -0,172274514 | -0,046302147 | -0,12597237 |  |
| 228523_at    | NANOS1            | -0,172274514 | -0,046302147 | -0,12597237 |  |
| 229897_at    | ZNF641            | -0,172274514 | -0,046302147 | -0,12597237 |  |
| 231219_at    | CMTM1             | -0,172274514 | -0,046302147 | -0,12597237 |  |
| 239440_at    | LOC100506858      | -0,172274514 | -0,046302147 | -0,12597237 |  |
| 202355_s_at  | GTF2F1            | 2,827046023  | 2,953119918  | -0,12607389 |  |
| 218754_at    | NOL9              | 2,959046717  | 3,08516499   | -0,12611827 |  |
| 228904_at    | HOXB3             | 1,373456798  | 1,499637023  | -0,12618022 |  |
| 1554475_a_at | C19orf47          | 0,03125738   | 0,157549243  | -0,12629186 |  |
| 224503_s_at  | ZCCHC2            | 0,03125738   | 0,157549243  | -0,12629186 |  |
| 238099_at    | -                 | 0,03125738   | 0,157549243  | -0,12629186 |  |

|              |                  |              |              |             |  |
|--------------|------------------|--------------|--------------|-------------|--|
| 242663_at    | LOC148189        | 0,03125738   | 0,157549243  | -0,12629186 |  |
| 242959_at    | -                | 0,03125738   | 0,157549243  | -0,12629186 |  |
| 214097_at    | RPS21            | 4,303988967  | 4,430312399  | -0,12632343 |  |
| 204497_at    | ADCY9            | 1,481627361  | 1,60795124   | -0,12632388 |  |
| 221774_x_at  | FAM48A           | 3,112743591  | 3,239069096  | -0,12632551 |  |
| 225260_s_at  | MRPL32           | 4,613886435  | 4,74021396   | -0,12632752 |  |
| 217727_x_at  | VPS35            | 4,995887722  | 5,122220781  | -0,12633306 |  |
| 1554597_at   | -                | 1,168140757  | 1,294497133  | -0,12635638 |  |
| 212646_at    | RFTN1            | 1,168140757  | 1,294497133  | -0,12635638 |  |
| 218342_s_at  | ERMP1            | 1,168140757  | 1,294497133  | -0,12635638 |  |
| 212860_at    | ZDHHC18          | 1,549482847  | 1,675891488  | -0,12640864 |  |
| 222109_at    | GNL3L            | 1,549482847  | 1,675891488  | -0,12640864 |  |
| 220341_s_at  | C5orf45          | 1,210676994  | 1,337086025  | -0,12640903 |  |
| 210581_x_at  | PATZ1            | 0,123193849  | 0,249604176  | -0,12641033 |  |
| 220604_x_at  | FTCD             | 0,123193849  | 0,249604176  | -0,12641033 |  |
| 229257_at    | TNRC18           | 0,123193849  | 0,249604176  | -0,12641033 |  |
| 230958_s_at  | -                | 0,123193849  | 0,249604176  | -0,12641033 |  |
| 244129_at    | -                | 0,123193849  | 0,249604176  | -0,12641033 |  |
| 204652_s_at  | NRF1             | 0,822971223  | 0,949447784  | -0,12647656 |  |
| 205142_x_at  | ABCD1            | 0,822971223  | 0,949447784  | -0,12647656 |  |
| 230992_at    | BTNL9            | 0,209623097  | 0,336136178  | -0,12651308 |  |
| 201560_at    | CLIC4            | 3,547344317  | 3,673964604  | -0,12662029 |  |
| 222460_s_at  | FAM192A          | 3,554701391  | 3,681421378  | -0,12671999 |  |
| 241838_at    | -                | 1,073999308  | 1,200746069  | -0,12674676 |  |
| 205405_at    | SEMA5A           | 0,44160593   | 0,568365095  | -0,12675917 |  |
| 209916_at    | DHTKD1           | 0,44160593   | 0,568365095  | -0,12675917 |  |
| 226514_at    | ZNF71            | 1,926486359  | 2,053299695  | -0,12681334 |  |
| 215210_s_at  | DLST             | 4,201088424  | 4,327920804  | -0,12683238 |  |
| 204460_s_at  | RAD1             | 2,833109217  | 2,959949103  | -0,12683989 |  |
| 204690_at    | STX8             | 3,013454777  | 3,140317145  | -0,12686237 |  |
| 1553997_a_at | ASPHD1           | 2,510717331  | 2,637603218  | -0,12688589 |  |
| 203027_s_at  | MVD              | 0,57782909   | 0,704715219  | -0,12688613 |  |
| 221621_at    | LINC00338 /// SC | 0,57782909   | 0,704715219  | -0,12688613 |  |
| 217751_at    | GSTK1            | 3,931919671  | 4,058831494  | -0,12691182 |  |
| 224304_x_at  | NIN              | 0,641402394  | 0,768343791  | -0,1269414  |  |
| 213491_x_at  | RPN2             | 6,43180736   | 6,558753696  | -0,12694634 |  |
| 202009_at    | TWF2             | 1,789769151  | 1,916759838  | -0,12699069 |  |
| 202279_at    | C14orf2          | 5,755540288  | 5,882554744  | -0,12701446 |  |
| 220607_x_at  | TH1L             | 4,546526407  | 4,673643206  | -0,12711168 |  |
| 216988_s_at  | PTP4A2           | 5,486538789  | 5,613677691  | -0,1271389  |  |
| 222405_at    | PTPLAD1          | 5,35892512   | 5,486073982  | -0,12714886 |  |
| 207625_s_at  | CBFA2T2          | 1,638726528  | 1,765933685  | -0,12720716 |  |
| 225789_at    | AGAP3            | 3,148435161  | 3,275657468  | -0,12722231 |  |
| 201433_s_at  | PTDSS1           | 4,852893656  | 4,980136916  | -0,12724326 |  |
| 204028_s_at  | RABGAP1          | 2,814842651  | 2,942125533  | -0,12728288 |  |
| 1554984_a_at | HLA-DOB          | -0,741668563 | -0,614371577 | -0,12729699 |  |
| 201382_at    | CACYBP           | -0,741668563 | -0,614371577 | -0,12729699 |  |
| 205924_at    | RAB3B            | -0,741668563 | -0,614371577 | -0,12729699 |  |
| 211865_s_at  | FZR1             | -0,741668563 | -0,614371577 | -0,12729699 |  |
| 214289_at    | PSMB1            | -0,741668563 | -0,614371577 | -0,12729699 |  |
| 227759_at    | PCSK9            | -0,741668563 | -0,614371577 | -0,12729699 |  |
| 229547_s_at  | WNK2             | -0,741668563 | -0,614371577 | -0,12729699 |  |
| 229977_at    | RTDR1            | -0,741668563 | -0,614371577 | -0,12729699 |  |
| 234591_at    | -                | -0,741668563 | -0,614371577 | -0,12729699 |  |
| 234927_s_at  | MAGIX            | -0,741668563 | -0,614371577 | -0,12729699 |  |
| 235421_at    | MAP3K8           | -0,741668563 | -0,614371577 | -0,12729699 |  |

|              |                   |              |              |             |  |
|--------------|-------------------|--------------|--------------|-------------|--|
| 238870_at    | KCNK9             | -0,741668563 | -0,614371577 | -0,12729699 |  |
| 240345_x_at  | -                 | -0,741668563 | -0,614371577 | -0,12729699 |  |
| 225068_at    | KLHL12            | 3,091402928  | 3,218713651  | -0,12731072 |  |
| 1556161_a_at | LOC100506102      | -1,240169874 | -1,112851844 | -0,12731803 |  |
| 205758_at    | CD8A              | -1,240169874 | -1,112851844 | -0,12731803 |  |
| 207613_s_at  | CAMK2A            | -1,240169874 | -1,112851844 | -0,12731803 |  |
| 207720_at    | LOR               | -1,240169874 | -1,112851844 | -0,12731803 |  |
| 209755_at    | NMNAT2            | -1,240169874 | -1,112851844 | -0,12731803 |  |
| 215552_s_at  | ESR1              | -1,240169874 | -1,112851844 | -0,12731803 |  |
| 218546_at    | C1orf115          | -1,240169874 | -1,112851844 | -0,12731803 |  |
| 230481_at    | ACY3              | -1,240169874 | -1,112851844 | -0,12731803 |  |
| 230963_at    | EMX2OS            | -1,240169874 | -1,112851844 | -0,12731803 |  |
| 231109_at    | -                 | -1,240169874 | -1,112851844 | -0,12731803 |  |
| 238416_x_at  | ZC3H18            | -1,240169874 | -1,112851844 | -0,12731803 |  |
| 244243_at    | -                 | -1,240169874 | -1,112851844 | -0,12731803 |  |
| 213846_at    | COX7C             | 3,779349411  | 3,906671027  | -0,12732162 |  |
| 225672_at    | GOLGA2            | 2,361396186  | 2,488772006  | -0,12737582 |  |
| 232527_at    | PSMD6-AS2         | 1,283332461  | 1,410714371  | -0,12738191 |  |
| 220917_s_at  | WDR19             | 2,416948786  | 2,544354523  | -0,12740574 |  |
| 225997_at    | MOB1B             | 5,181091454  | 5,308582294  | -0,12749084 |  |
| 201619_at    | PRDX3             | 5,957067261  | 6,084631403  | -0,12756414 |  |
| 221649_s_at  | PPAN /// PPAN-F   | 5,147729547  | 5,275295809  | -0,12756626 |  |
| 226779_at    | LMBRD2            | 2,852640442  | 2,980244813  | -0,12760437 |  |
| 1552708_a_at | DUSP19            | -0,946847173 | -0,819238336 | -0,12760884 |  |
| 1553949_at   | IQSEC3            | -0,946847173 | -0,819238336 | -0,12760884 |  |
| 1555713_at   | PNKD              | -0,946847173 | -0,819238336 | -0,12760884 |  |
| 1557413_a_at | -                 | -0,946847173 | -0,819238336 | -0,12760884 |  |
| 1560131_at   | LOC100506497      | -0,946847173 | -0,819238336 | -0,12760884 |  |
| 207758_at    | -                 | -0,946847173 | -0,819238336 | -0,12760884 |  |
| 208483_x_at  | KRT33A            | -0,946847173 | -0,819238336 | -0,12760884 |  |
| 211386_at    | MGC12488          | -0,946847173 | -0,819238336 | -0,12760884 |  |
| 214279_s_at  | NDRG2             | -0,946847173 | -0,819238336 | -0,12760884 |  |
| 221453_at    | G6PC2             | -0,946847173 | -0,819238336 | -0,12760884 |  |
| 227681_at    | ZFP36L2           | -0,946847173 | -0,819238336 | -0,12760884 |  |
| 228021_at    | -                 | -0,946847173 | -0,819238336 | -0,12760884 |  |
| 228815_s_at  | REPIN1            | -0,946847173 | -0,819238336 | -0,12760884 |  |
| 230990_at    | KIF13A            | -0,946847173 | -0,819238336 | -0,12760884 |  |
| 231061_at    | -                 | -0,946847173 | -0,819238336 | -0,12760884 |  |
| 233082_at    | ZNF630            | -0,946847173 | -0,819238336 | -0,12760884 |  |
| 236663_at    | -                 | -0,946847173 | -0,819238336 | -0,12760884 |  |
| 237318_at    | -                 | -0,946847173 | -0,819238336 | -0,12760884 |  |
| 241706_at    | CPNE8             | -0,946847173 | -0,819238336 | -0,12760884 |  |
| 218037_at    | FAM134A           | 1,865674241  | 1,993317152  | -0,12764291 |  |
| 218467_at    | PSMG2             | 5,652376942  | 5,780067139  | -0,1276902  |  |
| 209586_s_at  | PRUNE             | 3,176127502  | 3,303845028  | -0,12771753 |  |
| 209509_s_at  | DPAGT1            | 2,768138014  | 2,895866687  | -0,12772867 |  |
| 201357_s_at  | SF3A1             | 2,132266459  | 2,259997914  | -0,12773145 |  |
| 200082_s_at  | RPS7              | 7,19393451   | 7,32167675   | -0,12774224 |  |
| 222416_at    | ALDH18A1          | 4,148572682  | 4,276328567  | -0,12775588 |  |
| 219209_at    | IFIH1             | 2,238870125  | 2,366632651  | -0,12776253 |  |
| 228314_at    | LRRRC8C           | 1,063722698  | 1,191491281  | -0,12776858 |  |
| 200871_s_at  | PSAP              | 5,573764392  | 5,701665539  | -0,12790115 |  |
| 211862_x_at  | CFLAR             | 1,69307511   | 1,820984782  | -0,12790967 |  |
| 222001_x_at  | LOC728855 /// LOC | 1,722769813  | 1,85068474   | -0,12791493 |  |
| 213447_at    | IPW /// LOC1005   | 2,965960999  | 3,09388391   | -0,12792291 |  |
| 1553039_a_at | ASB10             | 1,780386218  | 1,908311039  | -0,12792482 |  |

|              |                |              |              |             |  |
|--------------|----------------|--------------|--------------|-------------|--|
| 65591_at     | WDR48          | 2,50882471   | 2,636751089  | -0,12792638 |  |
| 1552898_a_at | KCNG3          | -2,089474779 | -1,961547147 | -0,12792763 |  |
| 1557665_at   | -              | -2,089474779 | -1,961547147 | -0,12792763 |  |
| 1561890_at   | C10orf128      | -2,089474779 | -1,961547147 | -0,12792763 |  |
| 1562655_at   | -              | -2,089474779 | -1,961547147 | -0,12792763 |  |
| 203824_at    | TSPAN8         | -2,089474779 | -1,961547147 | -0,12792763 |  |
| 205054_at    | NEB            | -2,089474779 | -1,961547147 | -0,12792763 |  |
| 208396_s_at  | PDE1A          | -2,089474779 | -1,961547147 | -0,12792763 |  |
| 210122_at    | PRM2           | -2,089474779 | -1,961547147 | -0,12792763 |  |
| 211712_s_at  | ANXA9          | -2,089474779 | -1,961547147 | -0,12792763 |  |
| 220317_at    | LRAT           | -2,089474779 | -1,961547147 | -0,12792763 |  |
| 221391_at    | TAS2R14        | -2,089474779 | -1,961547147 | -0,12792763 |  |
| 226906_s_at  | ARHGAP9        | -2,089474779 | -1,961547147 | -0,12792763 |  |
| 227997_at    | IL17RD         | -2,089474779 | -1,961547147 | -0,12792763 |  |
| 228032_s_at  | DENND1B        | -2,089474779 | -1,961547147 | -0,12792763 |  |
| 228767_at    | -              | -2,089474779 | -1,961547147 | -0,12792763 |  |
| 229604_at    | CMAHP          | -2,089474779 | -1,961547147 | -0,12792763 |  |
| 232105_at    | -              | -2,089474779 | -1,961547147 | -0,12792763 |  |
| 234122_at    | -              | -2,089474779 | -1,961547147 | -0,12792763 |  |
| 234782_at    | KLHL31         | -2,089474779 | -1,961547147 | -0,12792763 |  |
| 235906_at    | TAF10          | -2,089474779 | -1,961547147 | -0,12792763 |  |
| 237181_at    | -              | -2,089474779 | -1,961547147 | -0,12792763 |  |
| 238312_s_at  | B4GALT3        | -2,089474779 | -1,961547147 | -0,12792763 |  |
| 238932_at    | -              | -2,089474779 | -1,961547147 | -0,12792763 |  |
| 239099_at    | POLR2M         | -2,089474779 | -1,961547147 | -0,12792763 |  |
| 242541_at    | ABCA9          | -2,089474779 | -1,961547147 | -0,12792763 |  |
| 243171_at    | -              | -2,089474779 | -1,961547147 | -0,12792763 |  |
| 244172_at    | -              | -2,089474779 | -1,961547147 | -0,12792763 |  |
| 234394_at    | ZNF124         | 2,038300149  | 2,166264721  | -0,12796457 |  |
| 201797_s_at  | VAR5           | 2,549899391  | 2,677924589  | -0,1280252  |  |
| 208946_s_at  | BECN1          | 3,939667505  | 4,067710529  | -0,12804302 |  |
| 223267_at    | TRMT10C        | 4,636814403  | 4,764991833  | -0,12817743 |  |
| 212356_at    | KHNYN          | 2,294858597  | 2,423075926  | -0,12821733 |  |
| 230375_at    | PNISR          | 1,426552034  | 1,55481039   | -0,12825836 |  |
| 226455_at    | CREB3L4        | 0,747935635  | 0,876248481  | -0,12831285 |  |
| 1569974_x_at | -              | 0,627515113  | 0,755840599  | -0,12832549 |  |
| 235040_at    | RUNDC1         | 0,627515113  | 0,755840599  | -0,12832549 |  |
| 1552558_a_at | RAI1           | 0,496120222  | 0,624460759  | -0,12834054 |  |
| 1553107_s_at | C5orf24        | 0,425644434  | 0,553993624  | -0,12834919 |  |
| 1565454_at   | XAGE-4         | 0,425644434  | 0,553993624  | -0,12834919 |  |
| 214608_s_at  | EYA1           | 0,425644434  | 0,553993624  | -0,12834919 |  |
| 223349_s_at  | BOK            | 0,425644434  | 0,553993624  | -0,12834919 |  |
| 231393_x_at  | ZBTB43         | 0,425644434  | 0,553993624  | -0,12834919 |  |
| 240363_at    | ANK1           | 0,425644434  | 0,553993624  | -0,12834919 |  |
| 216836_s_at  | ERBB2          | 0,351548291  | 0,479907041  | -0,12835875 |  |
| 220444_at    | ZNF557         | 0,351548291  | 0,479907041  | -0,12835875 |  |
| 222733_x_at  | RRP1           | 0,351548291  | 0,479907041  | -0,12835875 |  |
| 228104_at    | PLXNA4         | 0,351548291  | 0,479907041  | -0,12835875 |  |
| 1569366_a_at | ZNF569         | 2,611163891  | 2,739547836  | -0,12838395 |  |
| 215690_x_at  | GPAA1          | 3,388643755  | 3,517040489  | -0,12839673 |  |
| 214369_s_at  | RASGRP2        | 3,242549117  | 3,370970266  | -0,12842115 |  |
| 214351_x_at  | RPL13 /// SNOR | 6,931882933  | 7,060308554  | -0,12842562 |  |
| 217997_at    | PHLDA1         | 3,545499171  | 3,673964604  | -0,12846543 |  |
| 1560890_at   | LOC100505875   | -2,908843709 | -2,780313924 | -0,12852978 |  |
| 1560954_at   | -              | -2,908843709 | -2,780313924 | -0,12852978 |  |
| 1561879_at   | -              | -2,908843709 | -2,780313924 | -0,12852978 |  |

|              |                 |              |              |             |  |
|--------------|-----------------|--------------|--------------|-------------|--|
| 1564175_at   | LOC401074       | -2,908843709 | -2,780313924 | -0,12852978 |  |
| 1568365_at   | -               | -2,908843709 | -2,780313924 | -0,12852978 |  |
| 1570332_at   | -               | -2,908843709 | -2,780313924 | -0,12852978 |  |
| 200865_at    | EIF3F           | -2,908843709 | -2,780313924 | -0,12852978 |  |
| 205825_at    | PCSK1           | -2,908843709 | -2,780313924 | -0,12852978 |  |
| 216966_at    | ITGA2B          | -2,908843709 | -2,780313924 | -0,12852978 |  |
| 230560_at    | STXBP6          | -2,908843709 | -2,780313924 | -0,12852978 |  |
| 234352_x_at  | -               | -2,908843709 | -2,780313924 | -0,12852978 |  |
| 239371_at    | -               | -2,908843709 | -2,780313924 | -0,12852978 |  |
| 240799_at    | SLC35F4         | -2,908843709 | -2,780313924 | -0,12852978 |  |
| 241183_at    | -               | -2,908843709 | -2,780313924 | -0,12852978 |  |
| 242755_at    | -               | -2,908843709 | -2,780313924 | -0,12852978 |  |
| 242777_at    | -               | -2,908843709 | -2,780313924 | -0,12852978 |  |
| 243755_at    | PRLR            | -2,908843709 | -2,780313924 | -0,12852978 |  |
| 244682_at    | CAMSAP1         | -2,908843709 | -2,780313924 | -0,12852978 |  |
| 244878_at    | -               | -2,908843709 | -2,780313924 | -0,12852978 |  |
| 221059_s_at  | COTL1           | 5,084646091  | 5,213202033  | -0,12855594 |  |
| 218252_at    | CKAP2           | 3,908423345  | 4,037037849  | -0,1286145  |  |
| 224617_at    | PTBP3           | 4,689563828  | 4,818200317  | -0,12863649 |  |
| 209238_at    | STX3            | 3,815015946  | 3,943660335  | -0,12864439 |  |
| 216640_s_at  | PDIA6           | 5,46351634   | 5,592190191  | -0,12867385 |  |
| 226214_at    | GDE1            | 3,132544588  | 3,261354437  | -0,12880985 |  |
| 209813_x_at  | TARP            | 3,268508253  | 3,39737216   | -0,12886391 |  |
| 1555212_at   | OR8B8           | -0,59053611  | -0,461594427 | -0,12894168 |  |
| 204606_at    | CCL21           | -0,59053611  | -0,461594427 | -0,12894168 |  |
| 206129_s_at  | ARSB            | -0,59053611  | -0,461594427 | -0,12894168 |  |
| 207289_at    | MMP25           | -0,59053611  | -0,461594427 | -0,12894168 |  |
| 214145_s_at  | SPTB            | -0,59053611  | -0,461594427 | -0,12894168 |  |
| 218778_x_at  | EPS8L1          | -0,59053611  | -0,461594427 | -0,12894168 |  |
| 233859_at    | CEP128          | -0,59053611  | -0,461594427 | -0,12894168 |  |
| 234181_at    | -               | -0,59053611  | -0,461594427 | -0,12894168 |  |
| 236352_at    | VGLL2           | -0,59053611  | -0,461594427 | -0,12894168 |  |
| 240305_at    | -               | -0,59053611  | -0,461594427 | -0,12894168 |  |
| 212090_at    | GRINA           | 2,11992033   | 2,248887791  | -0,12896746 |  |
| 208420_x_at  | SUPT6H          | 2,097427503  | 2,226407528  | -0,12898003 |  |
| 242289_at    | -               | 2,097427503  | 2,226407528  | -0,12898003 |  |
| 1558693_s_at | C1orf85         | 1,556829052  | 1,685812099  | -0,12898305 |  |
| 222912_at    | ARRB1           | 1,556829052  | 1,685812099  | -0,12898305 |  |
| 204403_x_at  | FAM115A /// LOC | 2,522021211  | 2,651169275  | -0,12914806 |  |
| 223096_at    | NOP58           | 5,321407378  | 5,450632053  | -0,12922468 |  |
| 209494_s_at  | PATZ1           | 1,04816921   | 1,177496821  | -0,12932761 |  |
| 212374_at    | FEM1B           | 1,04816921   | 1,177496821  | -0,12932761 |  |
| 217856_at    | RBM8A           | 1,04816921   | 1,177496821  | -0,12932761 |  |
| 1555480_a_at | FBLIM1          | 0,181384709  | 0,310717132  | -0,12933242 |  |
| 224470_at    | SEC22C          | 0,181384709  | 0,310717132  | -0,12933242 |  |
| 223356_s_at  | MTIF3           | 2,243430036  | 2,372786857  | -0,12935682 |  |
| 204902_s_at  | ATG4B           | 1,000476627  | 1,129843209  | -0,12936658 |  |
| 65517_at     | AP1M2           | 0,137963061  | 0,267330837  | -0,12936778 |  |
| 208993_s_at  | PPIG            | 4,263031594  | 4,392446485  | -0,12941489 |  |
| 234746_at    | -               | 0,900083947  | 1,029536893  | -0,12945295 |  |
| 218873_at    | GON4L           | 1,820612054  | 1,950068772  | -0,12945672 |  |
| 212459_x_at  | SUCLG2          | 2,35929703   | 2,488772006  | -0,12947498 |  |
| 227730_at    | -               | -0,00073712  | 0,128747141  | -0,12948426 |  |
| 241498_at    | HARBI1          | -0,00073712  | 0,128747141  | -0,12948426 |  |
| 203786_s_at  | TPD52L1         | 3,046446467  | 3,175947691  | -0,12950122 |  |
| 212155_at    | RNF187          | 3,956428813  | 4,085930792  | -0,12950198 |  |

|              |              |              |              |             |  |
|--------------|--------------|--------------|--------------|-------------|--|
| 1562896_at   | TNRC18       | 0,792179257  | 0,921731975  | -0,12955272 |  |
| 229611_at    | LMLN         | 0,792179257  | 0,921731975  | -0,12955272 |  |
| 235170_at    | ZNF92        | 2,986507217  | 3,116064987  | -0,12955777 |  |
| 1553968_a_at | ADAT3        | 1,67631007   | 1,805902329  | -0,12959226 |  |
| 228620_at    | -            | 1,67631007   | 1,805902329  | -0,12959226 |  |
| 227945_at    | TBC1D1       | 0,735041319  | 0,864649967  | -0,12960865 |  |
| 227395_at    | TBCEL        | 1,261018186  | 1,390636111  | -0,12961793 |  |
| 216624_s_at  | MLL          | -0,325749314 | -0,19610998  | -0,12963933 |  |
| 221612_at    | LRTM1        | -0,325749314 | -0,19610998  | -0,12963933 |  |
| 217529_at    | ORAI2        | 0,67554678   | 0,805216064  | -0,12966928 |  |
| 1552456_a_at | MBD3L2       | -1,2845686   | -1,154897679 | -0,12967092 |  |
| 1555319_at   | STAB1        | -1,2845686   | -1,154897679 | -0,12967092 |  |
| 1556411_s_at | KY           | -1,2845686   | -1,154897679 | -0,12967092 |  |
| 1562830_at   | METT15       | -1,2845686   | -1,154897679 | -0,12967092 |  |
| 210313_at    | LILRA4       | -1,2845686   | -1,154897679 | -0,12967092 |  |
| 211893_x_at  | CD6          | -1,2845686   | -1,154897679 | -0,12967092 |  |
| 215348_at    | ADCY1        | -1,2845686   | -1,154897679 | -0,12967092 |  |
| 222061_at    | CD58         | -1,2845686   | -1,154897679 | -0,12967092 |  |
| 226244_at    | CLEC14A      | -1,2845686   | -1,154897679 | -0,12967092 |  |
| 226325_at    | ADSSL1       | -1,2845686   | -1,154897679 | -0,12967092 |  |
| 234837_at    | -            | -1,2845686   | -1,154897679 | -0,12967092 |  |
| 244585_at    | IFT140       | -1,2845686   | -1,154897679 | -0,12967092 |  |
| 225567_at    | -            | 2,134723057  | 2,264418116  | -0,12969506 |  |
| 224984_at    | NFAT5        | 3,565667132  | 3,695402096  | -0,12973496 |  |
| 225450_at    | AMOTL1       | 3,249366227  | 3,379145507  | -0,12977928 |  |
| 202680_at    | GTF2E2       | 3,58914411   | 3,718943256  | -0,12979915 |  |
| 212953_x_at  | CALR         | 5,506949478  | 5,636875498  | -0,12992602 |  |
| 203327_at    | IDE          | 3,277429131  | 3,407399455  | -0,12997032 |  |
| 1553099_at   | TIGD1        | 1,578645857  | 1,708698295  | -0,13005244 |  |
| 219374_s_at  | ALG9         | 1,578645857  | 1,708698295  | -0,13005244 |  |
| 226544_x_at  | EEF1E1-MUTED | 3,074867907  | 3,204982027  | -0,13011412 |  |
| 203037_s_at  | MTSS1        | 6,158140341  | 6,288272223  | -0,13013188 |  |
| 226132_s_at  | MANEAL       | 2,333865983  | 2,464004877  | -0,13013889 |  |
| 213021_at    | GOSR1        | 2,827046023  | 2,957221307  | -0,13017528 |  |
| 202068_s_at  | LDLR         | 5,996094827  | 6,126358851  | -0,13026402 |  |
| 212463_at    | CD59         | 1,406361373  | 1,536652708  | -0,13029133 |  |
| 216032_s_at  | ERGIC3       | 4,559384026  | 4,689754684  | -0,13037066 |  |
| 226876_at    | FAM101B      | 4,089014699  | 4,219411762  | -0,13039706 |  |
| 1552675_at   | DNAJB7       | -2,866296344 | -2,735862426 | -0,13043392 |  |
| 1553747_at   | MGC16025     | -2,866296344 | -2,735862426 | -0,13043392 |  |
| 1555003_at   | RBL1         | -2,866296344 | -2,735862426 | -0,13043392 |  |
| 1556695_a_at | FLJ42709     | -2,866296344 | -2,735862426 | -0,13043392 |  |
| 1556876_s_at | TPTE2P2      | -2,866296344 | -2,735862426 | -0,13043392 |  |
| 1557151_at   | -            | -2,866296344 | -2,735862426 | -0,13043392 |  |
| 1557856_at   | -            | -2,866296344 | -2,735862426 | -0,13043392 |  |
| 1558280_s_at | ARHGAP29     | -2,866296344 | -2,735862426 | -0,13043392 |  |
| 1561566_at   | LOC285501    | -2,866296344 | -2,735862426 | -0,13043392 |  |
| 1562990_at   | LINC00564    | -2,866296344 | -2,735862426 | -0,13043392 |  |
| 1565702_at   | SMAD4        | -2,866296344 | -2,735862426 | -0,13043392 |  |
| 210989_at    | LAMA4        | -2,866296344 | -2,735862426 | -0,13043392 |  |
| 216529_at    | -            | -2,866296344 | -2,735862426 | -0,13043392 |  |
| 222725_s_at  | PALMD        | -2,866296344 | -2,735862426 | -0,13043392 |  |
| 222926_at    | DCDC2        | -2,866296344 | -2,735862426 | -0,13043392 |  |
| 227198_at    | AFF3         | -2,866296344 | -2,735862426 | -0,13043392 |  |
| 231357_at    | CLEC12B      | -2,866296344 | -2,735862426 | -0,13043392 |  |
| 233118_at    | -            | -2,866296344 | -2,735862426 | -0,13043392 |  |

|              |                |              |              |             |  |
|--------------|----------------|--------------|--------------|-------------|--|
| 237492_at    | -              | -2,866296344 | -2,735862426 | -0,13043392 |  |
| 238875_at    | -              | -2,866296344 | -2,735862426 | -0,13043392 |  |
| 239914_at    | -              | -2,866296344 | -2,735862426 | -0,13043392 |  |
| 243500_at    | -              | -2,866296344 | -2,735862426 | -0,13043392 |  |
| 244134_at    | -              | -2,866296344 | -2,735862426 | -0,13043392 |  |
| 244350_at    | MYO10          | -2,866296344 | -2,735862426 | -0,13043392 |  |
| 226888_at    | CSNK1G1        | 2,525769574  | 2,656223838  | -0,13045426 |  |
| 214119_s_at  | FKBP1A         | 4,76563534   | 4,896108401  | -0,13047306 |  |
| 1569872_a_at | LMF1           | 1,940595304  | 2,071071048  | -0,13047574 |  |
| 213998_s_at  | DDX17          | 1,940595304  | 2,071071048  | -0,13047574 |  |
| 219369_s_at  | OTUB2          | 0,541261317  | 0,67181667   | -0,13055535 |  |
| 225323_at    | CC2D1B         | 0,541261317  | 0,67181667   | -0,13055535 |  |
| 202075_s_at  | PLTP           | 3,421207626  | 3,551810897  | -0,13060327 |  |
| 1558256_at   | LOC148189      | -0,986356909 | -0,855751026 | -0,13060588 |  |
| 1558711_at   | FAM13A-AS1     | -0,986356909 | -0,855751026 | -0,13060588 |  |
| 1558759_s_at | CLASP2         | -0,986356909 | -0,855751026 | -0,13060588 |  |
| 1562069_at   | -              | -0,986356909 | -0,855751026 | -0,13060588 |  |
| 206224_at    | CST1           | -0,986356909 | -0,855751026 | -0,13060588 |  |
| 216052_x_at  | ARTN           | -0,986356909 | -0,855751026 | -0,13060588 |  |
| 229155_at    | -              | -0,986356909 | -0,855751026 | -0,13060588 |  |
| 230278_at    | -              | -0,986356909 | -0,855751026 | -0,13060588 |  |
| 231533_at    | -              | -0,986356909 | -0,855751026 | -0,13060588 |  |
| 239652_at    | -              | -0,986356909 | -0,855751026 | -0,13060588 |  |
| 240057_at    | -              | -0,986356909 | -0,855751026 | -0,13060588 |  |
| 244833_at    | CCDC63         | -0,986356909 | -0,855751026 | -0,13060588 |  |
| 218697_at    | NCKIPSD        | 1,666156729  | 1,796776588  | -0,13061986 |  |
| 217850_at    | GNL3 /// SNORD | 5,00682487   | 5,137512296  | -0,13068743 |  |
| 227670_at    | ZNF75A         | 2,64946283   | 2,780243895  | -0,13078107 |  |
| 213709_at    | BHLHB9         | 0,401366113  | 0,532164371  | -0,13079826 |  |
| 221913_at    | SIRT3          | 0,401366113  | 0,532164371  | -0,13079826 |  |
| 224700_at    | STT3B          | 4,40564134   | 4,536462591  | -0,13082125 |  |
| 203338_at    | PPP2R5E        | 5,130600917  | 5,26154206   | -0,13094114 |  |
| 1562020_s_at | NT5DC4         | 2,536956583  | 2,667949403  | -0,13099282 |  |
| 241908_at    | BROX           | 0,984222186  | 1,115234684  | -0,1310125  |  |
| 36004_at     | IKBKG          | 1,631786706  | 1,762812816  | -0,13102611 |  |
| 205423_at    | AP1B1          | 2,077135162  | 2,208167653  | -0,13103249 |  |
| 207622_s_at  | ABCF2          | 3,236843482  | 3,367892567  | -0,13104908 |  |
| 221641_s_at  | ACOT9          | 3,798068007  | 3,92911743   | -0,13104942 |  |
| 223313_s_at  | MAGED4 /// MAG | 3,098971025  | 3,23005767   | -0,13108664 |  |
| 221328_at    | CLDN17         | 0,246434561  | 0,377530647  | -0,13109609 |  |
| 222471_s_at  | KCMF1          | 0,246434561  | 0,377530647  | -0,13109609 |  |
| 244732_at    | -              | 0,246434561  | 0,377530647  | -0,13109609 |  |
| 233647_s_at  | CDADC1         | 2,380152406  | 2,511262629  | -0,13111022 |  |
| 221203_s_at  | YEATS2         | 1,748661581  | 1,879785595  | -0,13112401 |  |
| 224893_at    | ATL3           | 3,397876879  | 3,529030171  | -0,13115329 |  |
| 51226_at     | -              | -2,218150343 | -2,086984744 | -0,1311656  |  |
| 201106_at    | GPX4           | 6,063483243  | 6,194681366  | -0,13119812 |  |
| 223163_s_at  | ZC3HC1         | 4,332624738  | 4,463850559  | -0,13122582 |  |
| 227680_at    | ZNF326         | 4,374280229  | 4,505522833  | -0,1312426  |  |
| 209215_at    | MFSD10         | 1,689737652  | 1,820984782  | -0,13124713 |  |
| 202492_at    | ATG9A          | 1,659347917  | 1,790660532  | -0,13131261 |  |
| 202741_at    | PRKACB         | 3,975055407  | 4,106388091  | -0,13133268 |  |
| 226821_at    | -              | 2,549899391  | 2,681234383  | -0,13133499 |  |
| 209736_at    | SOX13          | 0,82905153   | 0,960386719  | -0,13133519 |  |
| 215582_x_at  | MCM3AP         | 0,82905153   | 0,960386719  | -0,13133519 |  |
| 236070_at    | C2orf81        | 0,82905153   | 0,960386719  | -0,13133519 |  |

|              |                |              |              |             |  |
|--------------|----------------|--------------|--------------|-------------|--|
| 213626_at    | CBR4           | 2,051361651  | 2,182705233  | -0,13134358 |  |
| 235391_at    | FAM92A1        | 2,774453351  | 2,905803877  | -0,13135053 |  |
| 201775_s_at  | KIAA0494       | 1,46610492   | 1,59747851   | -0,13137359 |  |
| 206621_s_at  | EIF4H          | 5,328131017  | 5,459574496  | -0,13144348 |  |
| 200739_s_at  | SUMO3          | 4,067317457  | 4,198775061  | -0,1314576  |  |
| 238917_s_at  | DENND5B        | 0,072842263  | 0,204310755  | -0,13146849 |  |
| 202040_s_at  | KDM5A          | 2,261526912  | 2,39311332   | -0,13158641 |  |
| 226564_at    | ZFAT           | 0,715481152  | 0,847075464  | -0,13159431 |  |
| 205697_at    | SCGN           | 2,159061673  | 2,290658654  | -0,13159698 |  |
| 212737_at    | GM2A           | 3,579258128  | 3,710868933  | -0,13161081 |  |
| 206860_s_at  | MIOS           | 2,220484971  | 2,352169913  | -0,13168494 |  |
| 212911_at    | DNAJC16        | 2,220484971  | 2,352169913  | -0,13168494 |  |
| 204213_at    | PIGR           | -0,022466681 | 0,109221392  | -0,13168807 |  |
| 219038_at    | MORC4          | -0,022466681 | 0,109221392  | -0,13168807 |  |
| 225449_at    | RDH13          | -0,022466681 | 0,109221392  | -0,13168807 |  |
| 228558_at    | C14orf80       | 1,318332599  | 1,450051551  | -0,13171895 |  |
| 34764_at     | LARS2          | 3,064597504  | 3,196332914  | -0,13173541 |  |
| 201706_s_at  | PEX19          | 1,951783949  | 2,083632167  | -0,13184822 |  |
| 221542_s_at  | ERLIN2         | 1,951783949  | 2,083632167  | -0,13184822 |  |
| 201394_s_at  | RBM5           | 2,31665944   | 2,448549499  | -0,13189006 |  |
| 1555215_a_at | HRH3           | 0,592200562  | 0,724100169  | -0,13189961 |  |
| 204118_at    | CD48           | 0,592200562  | 0,724100169  | -0,13189961 |  |
| 223164_at    | CCM2           | 1,560488174  | 1,692388143  | -0,13189997 |  |
| 208622_s_at  | EZR            | 3,101484927  | 3,233443554  | -0,13195863 |  |
| 1560446_at   | LOC100132815   | -0,622910612 | -0,490927335 | -0,13198328 |  |
| 204906_at    | RPS6KA2        | -0,622910612 | -0,490927335 | -0,13198328 |  |
| 218045_x_at  | PTMS           | -0,622910612 | -0,490927335 | -0,13198328 |  |
| 230638_at    | -              | -0,622910612 | -0,490927335 | -0,13198328 |  |
| 234791_at    | GSX1           | -0,622910612 | -0,490927335 | -0,13198328 |  |
| 242251_at    | SPATA5         | -0,622910612 | -0,490927335 | -0,13198328 |  |
| 244762_at    | -              | -0,622910612 | -0,490927335 | -0,13198328 |  |
| 244798_at    | LOC100507492   | -0,622910612 | -0,490927335 | -0,13198328 |  |
| 225914_s_at  | CAB39L         | 1,021868205  | 1,153866761  | -0,13199856 |  |
| 239959_x_at  | -              | 1,021868205  | 1,153866761  | -0,13199856 |  |
| 87100_at     | ABHD2          | 0,795288196  | 0,927317897  | -0,1320297  |  |
| 1554696_s_at | TYMS           | 4,703696706  | 4,835756686  | -0,13205998 |  |
| 218274_s_at  | ANKZF1         | 0,97328325   | 1,105412836  | -0,13212959 |  |
| 1564906_at   | MATR3 /// SNHG | -0,234278768 | -0,102100538 | -0,13217823 |  |
| 1570007_at   | LRRC8C         | -0,234278768 | -0,102100538 | -0,13217823 |  |
| 206402_s_at  | NPFF           | -0,234278768 | -0,102100538 | -0,13217823 |  |
| 216892_at    | IGHG1          | -0,234278768 | -0,102100538 | -0,13217823 |  |
| 216965_x_at  | SPG20          | -0,234278768 | -0,102100538 | -0,13217823 |  |
| 227032_at    | PLXNA2         | -0,234278768 | -0,102100538 | -0,13217823 |  |
| 238388_x_at  | -              | -0,234278768 | -0,102100538 | -0,13217823 |  |
| 239795_at    | -              | -0,234278768 | -0,102100538 | -0,13217823 |  |
| 226602_s_at  | BCR            | 0,457392764  | 0,589657387  | -0,13226462 |  |
| 201129_at    | SRSF7          | 3,737131445  | 3,869433939  | -0,13230249 |  |
| 1553357_at   | LOC158696      | -2,823166348 | -2,690860744 | -0,1323056  |  |
| 1554739_at   | IPP            | -2,823166348 | -2,690860744 | -0,1323056  |  |
| 1555040_at   | LINC00612      | -2,823166348 | -2,690860744 | -0,1323056  |  |
| 1556065_at   | LOC284926      | -2,823166348 | -2,690860744 | -0,1323056  |  |
| 1556528_at   | LOC285326      | -2,823166348 | -2,690860744 | -0,1323056  |  |
| 1562520_at   | -              | -2,823166348 | -2,690860744 | -0,1323056  |  |
| 1563032_at   | -              | -2,823166348 | -2,690860744 | -0,1323056  |  |
| 1563724_at   | -              | -2,823166348 | -2,690860744 | -0,1323056  |  |
| 1569331_at   | -              | -2,823166348 | -2,690860744 | -0,1323056  |  |



|             |                |              |              |             |  |
|-------------|----------------|--------------|--------------|-------------|--|
| 211265_at   | PTGER3         | -2,823166348 | -2,690860744 | -0,1323056  |  |
| 214598_at   | CLDN8          | -2,823166348 | -2,690860744 | -0,1323056  |  |
| 215713_at   | -              | -2,823166348 | -2,690860744 | -0,1323056  |  |
| 216179_x_at | -              | -2,823166348 | -2,690860744 | -0,1323056  |  |
| 216413_at   | -              | -2,823166348 | -2,690860744 | -0,1323056  |  |
| 217110_s_at | MUC4           | -2,823166348 | -2,690860744 | -0,1323056  |  |
| 220356_at   | CORIN          | -2,823166348 | -2,690860744 | -0,1323056  |  |
| 220803_at   | STAMBPL1       | -2,823166348 | -2,690860744 | -0,1323056  |  |
| 231438_x_at | -              | -2,823166348 | -2,690860744 | -0,1323056  |  |
| 235969_at   | SCN8A          | -2,823166348 | -2,690860744 | -0,1323056  |  |
| 237499_at   | -              | -2,823166348 | -2,690860744 | -0,1323056  |  |
| 239591_at   | -              | -2,823166348 | -2,690860744 | -0,1323056  |  |
| 240338_at   | -              | -2,823166348 | -2,690860744 | -0,1323056  |  |
| 240832_at   | -              | -2,823166348 | -2,690860744 | -0,1323056  |  |
| 241519_at   | HIST1H2BA      | -2,823166348 | -2,690860744 | -0,1323056  |  |
| 241620_at   | SMCHD1         | -2,823166348 | -2,690860744 | -0,1323056  |  |
| 242605_at   | DCN            | -2,823166348 | -2,690860744 | -0,1323056  |  |
| 243080_at   | HECW2          | -2,823166348 | -2,690860744 | -0,1323056  |  |
| 243551_at   | -              | -2,823166348 | -2,690860744 | -0,1323056  |  |
| 243929_at   | -              | -2,823166348 | -2,690860744 | -0,1323056  |  |
| 244583_at   | -              | -2,823166348 | -2,690860744 | -0,1323056  |  |
| 1569763_at  | -              | -0,352951799 | -0,220592223 | -0,13235958 |  |
| 207639_at   | FZD9           | -0,352951799 | -0,220592223 | -0,13235958 |  |
| 208397_x_at | KCNJ5          | -0,352951799 | -0,220592223 | -0,13235958 |  |
| 236624_at   | LOC643837      | -0,352951799 | -0,220592223 | -0,13235958 |  |
| 241496_at   | BTNL9          | -0,352951799 | -0,220592223 | -0,13235958 |  |
| 243584_at   | -              | -0,352951799 | -0,220592223 | -0,13235958 |  |
| 219320_at   | MYO19          | 1,649074067  | 1,781437557  | -0,13236349 |  |
| 212597_s_at | HMGXB4         | 2,763383302  | 2,895866687  | -0,13248339 |  |
| 202795_x_at | TRIOBP         | 1,58584542   | 1,718396606  | -0,13255119 |  |
| 224611_s_at | DNAJC5         | 2,310153708  | 2,442710777  | -0,13255707 |  |
| 200026_at   | RPL34          | 7,473599256  | 7,606197703  | -0,13259845 |  |
| 211708_s_at | SCD            | 2,365585359  | 2,498185745  | -0,13260039 |  |
| 201231_s_at | ENO1           | 6,837394328  | 6,969996827  | -0,1326025  |  |
| 203291_at   | CNOT4          | 2,747420128  | 2,880111483  | -0,13269136 |  |
| 213508_at   | SPTSSA         | 2,967339888  | 3,100079607  | -0,13273972 |  |
| 226774_at   | FAM120B        | 2,014487247  | 2,147243253  | -0,13275601 |  |
| 222305_at   | HK2            | 0,760715727  | 0,893473268  | -0,13275754 |  |
| 230618_s_at | PRRC2C         | 2,954882186  | 3,087661492  | -0,13277931 |  |
| 204048_s_at | PHACTR2        | 4,514343647  | 4,647230798  | -0,13288715 |  |
| 201343_at   | UBE2D2         | 3,772266845  | 3,905256463  | -0,13298962 |  |
| 208938_at   | PRCC           | 1,64218396   | 1,775255987  | -0,13307203 |  |
| 230006_s_at | SVIP           | 3,010782559  | 3,14392006   | -0,1331375  |  |
| 229236_s_at | SFXN4          | 1,81142822   | 1,944570415  | -0,1331422  |  |
| 209856_x_at | ABI2           | 1,515954005  | 1,64909809   | -0,13314409 |  |
| 200760_s_at | ARL6IP5        | 3,245961699  | 3,379145507  | -0,13318381 |  |
| 201405_s_at | COPS6          | 3,641042878  | 3,77423254   | -0,13318966 |  |
| 227748_at   | RBMXL1         | 2,16388051   | 2,297144887  | -0,13326438 |  |
| 220044_x_at | LUC7L3         | 4,506303097  | 4,639594721  | -0,13329162 |  |
| 222706_at   | CWC25          | 2,009141686  | 2,14244844   | -0,13330675 |  |
| 211578_s_at | RPS6KB1        | 1,224581536  | 1,3579181    | -0,13333656 |  |
| 225843_at   | ZFYVE19        | 1,224581536  | 1,3579181    | -0,13333656 |  |
| 1561990_at  | LOC157931      | -1,353583928 | -1,220210588 | -0,13337334 |  |
| 1562760_at  | -              | -1,353583928 | -1,220210588 | -0,13337334 |  |
| 203758_at   | CTSO           | -1,353583928 | -1,220210588 | -0,13337334 |  |
| 204760_s_at | NR1D1 /// THRA | -1,353583928 | -1,220210588 | -0,13337334 |  |

|             |                  |              |              |             |  |
|-------------|------------------|--------------|--------------|-------------|--|
| 211908_x_at | IGK@             | -1,353583928 | -1,220210588 | -0,13337334 |  |
| 213715_s_at | KANK3            | -1,353583928 | -1,220210588 | -0,13337334 |  |
| 215860_at   | SYT12            | -1,353583928 | -1,220210588 | -0,13337334 |  |
| 215985_at   | ZNRD1-AS1        | -1,353583928 | -1,220210588 | -0,13337334 |  |
| 217409_at   | -                | -1,353583928 | -1,220210588 | -0,13337334 |  |
| 220064_at   | LOC100506124 /   | -1,353583928 | -1,220210588 | -0,13337334 |  |
| 228779_at   | LOC146880        | -1,353583928 | -1,220210588 | -0,13337334 |  |
| 229636_at   | LOC100506802     | -1,353583928 | -1,220210588 | -0,13337334 |  |
| 233807_at   | -                | -1,353583928 | -1,220210588 | -0,13337334 |  |
| 234116_at   | GJD4             | -1,353583928 | -1,220210588 | -0,13337334 |  |
| 234620_at   | -                | -1,353583928 | -1,220210588 | -0,13337334 |  |
| 236344_at   | PDE1C            | -1,353583928 | -1,220210588 | -0,13337334 |  |
| 241007_at   | -                | -1,353583928 | -1,220210588 | -0,13337334 |  |
| 243960_x_at | -                | -1,353583928 | -1,220210588 | -0,13337334 |  |
| 216574_s_at | LOC729020 /// R  | 1,912238072  | 2,045615873  | -0,1333778  |  |
| 210125_s_at | BANF1            | 4,076291169  | 4,209703428  | -0,13341226 |  |
| 223035_s_at | FARSB            | 4,592823355  | 4,726262343  | -0,13343899 |  |
| 221830_at   | RAP2A            | 2,392522438  | 2,526063925  | -0,13354149 |  |
| 218767_at   | REXO4            | 2,201862497  | 2,335461563  | -0,13359907 |  |
| 231260_at   | LOC386758        | 1,139070151  | 1,272721751  | -0,1336516  |  |
| 201520_s_at | GRSF1            | 4,559384026  | 4,69303748   | -0,13365345 |  |
| 239053_at   | CIAO1            | 1,575032557  | 1,708698295  | -0,13366574 |  |
| 223721_s_at | DNAJC12          | 2,819431021  | 2,953119918  | -0,1336889  |  |
| 219818_s_at | GPATCH1          | 3,316904202  | 3,450709925  | -0,13380572 |  |
| 225065_x_at | C17orf76-AS1 /// | 5,271491396  | 5,405319208  | -0,13382781 |  |
| 211051_s_at | EXTL3            | 0,95671774   | 1,090553537  | -0,1338358  |  |
| 208735_s_at | CTDSP2           | 2,048758794  | 2,182705233  | -0,13394644 |  |
| 222519_s_at | IFT57            | 1,296557217  | 1,43051703   | -0,13395981 |  |
| 235112_at   | -                | 1,296557217  | 1,43051703   | -0,13395981 |  |
| 219146_at   | TEFM             | 3,406034785  | 3,540009821  | -0,13397504 |  |
| 214894_x_at | MACF1            | 2,333865983  | 2,467842989  | -0,13397701 |  |
| 224897_at   | WDR26            | 2,333865983  | 2,467842989  | -0,13397701 |  |
| 203219_s_at | APRT             | 2,571820446  | 2,705818724  | -0,13399828 |  |
| 1560145_at  | MKLN1            | 1,473887017  | 1,60795124   | -0,13406422 |  |
| 207170_s_at | LETMD1           | 3,378314944  | 3,512402411  | -0,13408747 |  |
| 226145_s_at | FRAS1            | 3,217273782  | 3,351366359  | -0,13409258 |  |
| 223922_x_at | MS4A6A           | 0,57058931   | 0,704715219  | -0,13412591 |  |
| 212424_at   | PDCD11           | 3,413135307  | 3,547283438  | -0,13414813 |  |
| 205070_at   | ING3             | 2,814842651  | 2,949006836  | -0,13416418 |  |
| 207761_s_at | METTL7A          | 2,38635068   | 2,520531219  | -0,13418054 |  |
| 217718_s_at | YWHAB            | 6,962714891  | 7,096938148  | -0,13422326 |  |
| 1565611_at  | DYNLRB1          | 0,133056859  | 0,26733076   | -0,1342739  |  |
| 222480_at   | UBE2Q1           | 0,133056859  | 0,26733076   | -0,1342739  |  |
| 243629_x_at | MFI2-AS1         | 0,133056859  | 0,26733076   | -0,1342739  |  |
| 227046_at   | SLC39A11         | 1,215326747  | 1,349621332  | -0,13429458 |  |
| 223365_at   | DHX37            | 2,043538949  | 2,17802703   | -0,13448808 |  |
| 224013_s_at | SOX7             | 2,485917452  | 2,620464265  | -0,13454681 |  |
| 200868_s_at | RNF114           | 3,426229985  | 3,560823412  | -0,13459343 |  |
| 209667_at   | CES2             | 1,795990708  | 1,930732138  | -0,13474143 |  |
| 213696_s_at | MED8             | 2,713311265  | 2,848075314  | -0,13476405 |  |
| 223197_s_at | SMARCA1          | 3,466766854  | 3,601570866  | -0,13480401 |  |
| 224885_s_at | KRTCAP2          | 5,175733551  | 5,310587328  | -0,13485378 |  |
| 238044_at   | -                | 0,682279745  | 0,817300337  | -0,13502059 |  |
| 201702_s_at | PPP1R10          | 0,359971644  | 0,495031851  | -0,13506021 |  |
| 203771_s_at | BLVRA            | 0,359971644  | 0,495031851  | -0,13506021 |  |
| 222231_s_at | LRRC59           | 5,30090967   | 5,43601193   | -0,13510226 |  |

|              |               |              |              |             |  |
|--------------|---------------|--------------|--------------|-------------|--|
| 218859_s_at  | ESF1          | 3,359534664  | 3,49464046   | -0,1351058  |  |
| 232323_s_at  | TTC17         | 1,496984567  | 1,632095957  | -0,13511139 |  |
| 1558211_s_at | SRC           | -0,055687482 | 0,079428135  | -0,13511562 |  |
| 217458_at    | -             | -0,055687482 | 0,079428135  | -0,13511562 |  |
| 219719_at    | HIGD1B        | -0,055687482 | 0,079428135  | -0,13511562 |  |
| 229062_at    | ARL9          | -0,055687482 | 0,079428135  | -0,13511562 |  |
| 237703_at    | -             | -0,055687482 | 0,079428135  | -0,13511562 |  |
| 238161_at    | -             | -0,055687482 | 0,079428135  | -0,13511562 |  |
| 241973_x_at  | DPP7          | -0,055687482 | 0,079428135  | -0,13511562 |  |
| 242780_at    | VAPA          | -0,055687482 | 0,079428135  | -0,13511562 |  |
| 1554165_at   | FAM53B        | -2,756478458 | -2,621331989 | -0,13514647 |  |
| 1555324_at   | PTK7          | -2,756478458 | -2,621331989 | -0,13514647 |  |
| 1557845_at   | -             | -2,756478458 | -2,621331989 | -0,13514647 |  |
| 1559409_a_at | CC2D2A        | -2,756478458 | -2,621331989 | -0,13514647 |  |
| 1563203_at   | -             | -2,756478458 | -2,621331989 | -0,13514647 |  |
| 1568739_at   | LOC285692     | -2,756478458 | -2,621331989 | -0,13514647 |  |
| 1569539_at   | -             | -2,756478458 | -2,621331989 | -0,13514647 |  |
| 205289_at    | BMP2          | -2,756478458 | -2,621331989 | -0,13514647 |  |
| 206588_at    | DAZL          | -2,756478458 | -2,621331989 | -0,13514647 |  |
| 206914_at    | CRTAM         | -2,756478458 | -2,621331989 | -0,13514647 |  |
| 213197_at    | ASTN1         | -2,756478458 | -2,621331989 | -0,13514647 |  |
| 215213_at    | NUP54         | -2,756478458 | -2,621331989 | -0,13514647 |  |
| 219773_at    | NOX4          | -2,756478458 | -2,621331989 | -0,13514647 |  |
| 220321_s_at  | CCDC121       | -2,756478458 | -2,621331989 | -0,13514647 |  |
| 220614_s_at  | ADGB          | -2,756478458 | -2,621331989 | -0,13514647 |  |
| 227082_at    | -             | -2,756478458 | -2,621331989 | -0,13514647 |  |
| 233818_at    | LTN1          | -2,756478458 | -2,621331989 | -0,13514647 |  |
| 234798_x_at  | -             | -2,756478458 | -2,621331989 | -0,13514647 |  |
| 234893_s_at  | DNAH6         | -2,756478458 | -2,621331989 | -0,13514647 |  |
| 238512_at    | -             | -2,756478458 | -2,621331989 | -0,13514647 |  |
| 240462_at    | CLYBL         | -2,756478458 | -2,621331989 | -0,13514647 |  |
| 240602_at    | HBS1L         | -2,756478458 | -2,621331989 | -0,13514647 |  |
| 240668_s_at  | SERP2         | -2,756478458 | -2,621331989 | -0,13514647 |  |
| 242072_at    | -             | -2,756478458 | -2,621331989 | -0,13514647 |  |
| 242137_at    | RBMS3         | -2,756478458 | -2,621331989 | -0,13514647 |  |
| 242196_at    | ARHGAP32      | -2,756478458 | -2,621331989 | -0,13514647 |  |
| 244151_at    | LOC100507203  | -2,756478458 | -2,621331989 | -0,13514647 |  |
| 202808_at    | WBP1L         | 4,368029766  | 4,50318707   | -0,1351573  |  |
| 221599_at    | C11orf67      | 2,303618506  | 2,438805127  | -0,13518662 |  |
| 223398_at    | C9orf89       | 1,764611101  | 1,899812471  | -0,13520137 |  |
| 226577_at    | PSEN1         | 2,102456302  | 2,237691445  | -0,13523514 |  |
| 202546_at    | VAMP8         | 4,393896578  | 4,529134074  | -0,1352375  |  |
| 201516_at    | SRM           | 4,94919864   | 5,084439818  | -0,13524118 |  |
| 64064_at     | GIMAP1-GIMAP5 | 0,321673907  | 0,456918297  | -0,13524439 |  |
| 1568754_at   | -             | -1,047650486 | -0,912331589 | -0,1353189  |  |
| 207976_at    | KLHL18        | -1,047650486 | -0,912331589 | -0,1353189  |  |
| 217361_at    | -             | -1,047650486 | -0,912331589 | -0,1353189  |  |
| 222486_s_at  | ADAMTS1       | -1,047650486 | -0,912331589 | -0,1353189  |  |
| 229537_at    | LMO4          | -1,047650486 | -0,912331589 | -0,1353189  |  |
| 234315_at    | BACH1         | -1,047650486 | -0,912331589 | -0,1353189  |  |
| 238042_at    | -             | -1,047650486 | -0,912331589 | -0,1353189  |  |
| 239105_at    | -             | -1,047650486 | -0,912331589 | -0,1353189  |  |
| 240620_at    | -             | -1,047650486 | -0,912331589 | -0,1353189  |  |
| 218474_s_at  | KCTD5         | 3,046446467  | 3,181801492  | -0,13535502 |  |
| 218050_at    | UFM1          | 4,106641205  | 4,242000447  | -0,13535924 |  |
| 209026_x_at  | TUBB          | 6,330775067  | 6,466152354  | -0,13537729 |  |

|              |                  |              |              |             |  |
|--------------|------------------|--------------|--------------|-------------|--|
| 207046_at    | HIST1H4A /// HIS | 1,079110292  | 1,214517879  | -0,13540759 |  |
| 214909_s_at  | DDAH2            | 2,734521183  | 2,869995113  | -0,13547393 |  |
| 1557493_x_at | LOC100240728     | -1,399512875 | -1,264005341 | -0,13550753 |  |
| 1557886_at   | CEP112           | -1,399512875 | -1,264005341 | -0,13550753 |  |
| 1559800_a_at | LOC100507570     | -1,399512875 | -1,264005341 | -0,13550753 |  |
| 1563830_a_at | FHAD1            | -1,399512875 | -1,264005341 | -0,13550753 |  |
| 211046_at    | KCNH6            | -1,399512875 | -1,264005341 | -0,13550753 |  |
| 211875_x_at  | PCDHGA10         | -1,399512875 | -1,264005341 | -0,13550753 |  |
| 214242_at    | MAN1A2           | -1,399512875 | -1,264005341 | -0,13550753 |  |
| 215437_x_at  | BAZ2A            | -1,399512875 | -1,264005341 | -0,13550753 |  |
| 216725_at    | DCLK2            | -1,399512875 | -1,264005341 | -0,13550753 |  |
| 230959_at    | -                | -1,399512875 | -1,264005341 | -0,13550753 |  |
| 238533_at    | EPHA7            | -1,399512875 | -1,264005341 | -0,13550753 |  |
| 243084_at    | CALD1            | -1,399512875 | -1,264005341 | -0,13550753 |  |
| 243676_at    | -                | -1,399512875 | -1,264005341 | -0,13550753 |  |
| 236755_at    | -                | 0,555999837  | 0,691645685  | -0,13564585 |  |
| 202468_s_at  | CTNNAL1          | 4,22203305   | 4,357702907  | -0,13566986 |  |
| 212696_s_at  | RNF4             | 4,155242648  | 4,291026333  | -0,13578369 |  |
| 228479_at    | SOAT1            | 2,139623739  | 2,275409734  | -0,135786   |  |
| 222432_s_at  | CCDC47           | 3,943876123  | 4,079673902  | -0,13579778 |  |
| 230820_at    | -                | 0,20027154   | 0,336136178  | -0,13586464 |  |
| 236838_at    | SRCIN1           | 0,20027154   | 0,336136178  | -0,13586464 |  |
| 239434_at    | -                | 0,20027154   | 0,336136178  | -0,13586464 |  |
| 200715_x_at  | RPL13A /// SNOF  | 6,418511432  | 6,554417224  | -0,13590579 |  |
| 225148_at    | RPS19BP1         | 4,189319777  | 4,32527877   | -0,13595899 |  |
| 218524_at    | E4F1             | 1,614289682  | 1,750261389  | -0,13597171 |  |
| 227810_at    | ZNF558           | 2,536956583  | 2,672945617  | -0,13598903 |  |
| 200822_x_at  | TPI1             | 6,08301344   | 6,219081438  | -0,136068   |  |
| 209428_s_at  | ZFPL1            | 1,454352496  | 1,590454215  | -0,13610172 |  |
| 200755_s_at  | CALU             | 4,885714824  | 5,021853686  | -0,13613886 |  |
| 221739_at    | C19orf10         | 3,136227209  | 3,272369332  | -0,13614212 |  |
| 201478_s_at  | DKC1 /// SNORA   | 5,434648023  | 5,570823999  | -0,13617598 |  |
| 220744_s_at  | IFT122           | 1,90937145   | 2,045615873  | -0,13624442 |  |
| 210415_s_at  | ODF2             | 1,274448124  | 1,410714371  | -0,13626625 |  |
| 218335_x_at  | TNIP2            | 1,780386218  | 1,916759838  | -0,13637362 |  |
| 204738_s_at  | KRIT1            | 0,417596971  | 0,553993624  | -0,13639665 |  |
| 228065_at    | BCL9L            | 0,417596971  | 0,553993624  | -0,13639665 |  |
| 232274_at    | CCNL2            | 0,417596971  | 0,553993624  | -0,13639665 |  |
| 234738_s_at  | KLHDC4 /// LOC   | 0,417596971  | 0,553993624  | -0,13639665 |  |
| 223638_at    | LOC100653178 /   | 2,696781084  | 2,833274877  | -0,13649379 |  |
| 210417_s_at  | PI4KB            | 1,233777334  | 1,370274469  | -0,13649714 |  |
| 211323_s_at  | ITPR1            | 1,381753566  | 1,518263577  | -0,13651001 |  |
| 219470_x_at  | CCNJ             | 1,381753566  | 1,518263577  | -0,13651001 |  |
| 214948_s_at  | TMF1             | 4,204015647  | 4,340535652  | -0,13652    |  |
| 225920_at    | LOC148413        | 1,751865623  | 1,888402606  | -0,13653698 |  |
| 205778_at    | KLK7             | -0,394749123 | -0,258114234 | -0,13663489 |  |
| 215286_s_at  | PHTF2            | -0,394749123 | -0,258114234 | -0,13663489 |  |
| 227128_s_at  | TACSTD2          | -0,394749123 | -0,258114234 | -0,13663489 |  |
| 229532_at    | ZNF502           | -0,394749123 | -0,258114234 | -0,13663489 |  |
| 231108_at    | FUS              | -0,394749123 | -0,258114234 | -0,13663489 |  |
| 233541_at    | LIMD1-AS1        | -0,394749123 | -0,258114234 | -0,13663489 |  |
| 234816_at    | LINC00521        | -0,394749123 | -0,258114234 | -0,13663489 |  |
| 236364_at    | -                | -0,394749123 | -0,258114234 | -0,13663489 |  |
| 239073_at    | ANKFY1           | -0,394749123 | -0,258114234 | -0,13663489 |  |
| 225319_s_at  | FAM104A          | 2,830080806  | 2,966746113  | -0,13666531 |  |
| 213390_at    | ZC3H4            | 4,217404896  | 4,354078399  | -0,1366735  |  |

|              |                 |              |              |             |  |
|--------------|-----------------|--------------|--------------|-------------|--|
| 226236_at    | LINC00493       | 4,845789115  | 4,982486434  | -0,13669732 |  |
| 227221_at    | ZMAT3           | 1,607231019  | 1,743944487  | -0,13671347 |  |
| 201131_s_at  | CDH1            | 0,928678725  | 1,065442793  | -0,13676407 |  |
| 1554006_a_at | LLGL2           | -0,67289328  | -0,536087151 | -0,13680613 |  |
| 208902_s_at  | RPS28           | -0,67289328  | -0,536087151 | -0,13680613 |  |
| 209616_s_at  | CES1 /// LOC100 | -0,67289328  | -0,536087151 | -0,13680613 |  |
| 212531_at    | LCN2            | -0,67289328  | -0,536087151 | -0,13680613 |  |
| 215358_x_at  | ZNF37BP         | -0,67289328  | -0,536087151 | -0,13680613 |  |
| 217158_at    | PTGER4P2        | -0,67289328  | -0,536087151 | -0,13680613 |  |
| 222278_at    | -               | -0,67289328  | -0,536087151 | -0,13680613 |  |
| 227756_at    | FAM81A          | -0,67289328  | -0,536087151 | -0,13680613 |  |
| 234860_at    | -               | -0,67289328  | -0,536087151 | -0,13680613 |  |
| 235169_at    | FBXO27          | -0,67289328  | -0,536087151 | -0,13680613 |  |
| 240003_at    | -               | -0,67289328  | -0,536087151 | -0,13680613 |  |
| 240565_at    | ZFP28           | -0,67289328  | -0,536087151 | -0,13680613 |  |
| 243727_at    | CPNE8           | -0,67289328  | -0,536087151 | -0,13680613 |  |
| 1566303_s_at | PPP1R11         | 2,171078719  | 2,307890888  | -0,13681217 |  |
| 200094_s_at  | EEF2            | 6,373978588  | 6,510843436  | -0,13686485 |  |
| 1558094_s_at | C3orf19         | 0,020670649  | 0,157549243  | -0,13687859 |  |
| 209631_s_at  | GPR37           | 0,020670649  | 0,157549243  | -0,13687859 |  |
| 214786_at    | MAP3K1          | 0,020670649  | 0,157549243  | -0,13687859 |  |
| 216929_x_at  | ABO             | 0,020670649  | 0,157549243  | -0,13687859 |  |
| 234143_at    | -               | 0,020670649  | 0,157549243  | -0,13687859 |  |
| 235341_at    | DNAJC3          | 0,020670649  | 0,157549243  | -0,13687859 |  |
| 1554797_at   | SYT16           | -2,712026959 | -2,575129729 | -0,13689723 |  |
| 1556086_at   | C4orf27         | -2,712026959 | -2,575129729 | -0,13689723 |  |
| 1558640_a_at | GUSBP1          | -2,712026959 | -2,575129729 | -0,13689723 |  |
| 1558813_at   | TMED5           | -2,712026959 | -2,575129729 | -0,13689723 |  |
| 1559756_at   | DKFZp667F0711   | -2,712026959 | -2,575129729 | -0,13689723 |  |
| 1561476_at   | -               | -2,712026959 | -2,575129729 | -0,13689723 |  |
| 1562969_at   | DNMBP           | -2,712026959 | -2,575129729 | -0,13689723 |  |
| 1563103_at   | -               | -2,712026959 | -2,575129729 | -0,13689723 |  |
| 1564776_at   | -               | -2,712026959 | -2,575129729 | -0,13689723 |  |
| 1569277_at   | ZNF91           | -2,712026959 | -2,575129729 | -0,13689723 |  |
| 1569630_a_at | RUFY2           | -2,712026959 | -2,575129729 | -0,13689723 |  |
| 1569850_at   | LPHN2           | -2,712026959 | -2,575129729 | -0,13689723 |  |
| 207262_at    | APOF            | -2,712026959 | -2,575129729 | -0,13689723 |  |
| 216747_at    | APBB2           | -2,712026959 | -2,575129729 | -0,13689723 |  |
| 224094_at    | -               | -2,712026959 | -2,575129729 | -0,13689723 |  |
| 226818_at    | MPEG1           | -2,712026959 | -2,575129729 | -0,13689723 |  |
| 235284_s_at  | LOC388692       | -2,712026959 | -2,575129729 | -0,13689723 |  |
| 236412_at    | LOC100505983    | -2,712026959 | -2,575129729 | -0,13689723 |  |
| 244148_at    | -               | -2,712026959 | -2,575129729 | -0,13689723 |  |
| 244459_at    | -               | -2,712026959 | -2,575129729 | -0,13689723 |  |
| 224806_at    | TRIM25          | 2,064305961  | 2,201267805  | -0,13696184 |  |
| 218992_at    | PLGRKT          | 1,063722698  | 1,200746069  | -0,13702337 |  |
| 209489_at    | CELF1           | 4,143092407  | 4,2801535    | -0,13706109 |  |
| 224608_s_at  | VPS25           | 4,090280902  | 4,227358095  | -0,13707719 |  |
| 224616_at    | DYNC1LI2        | 4,206061174  | 4,343149918  | -0,13708874 |  |
| 230574_at    | LOC100130938    | 4,012270435  | 4,149442805  | -0,13717237 |  |
| 225558_at    | GIT2            | 3,217273782  | 3,354479478  | -0,1372057  |  |
| 208702_x_at  | APLP2           | 4,422327249  | 4,559576852  | -0,1372496  |  |
| 225665_at    | ZAK             | 2,017152618  | 2,154405725  | -0,13725311 |  |
| 201700_at    | CCND3           | 5,308953409  | 5,446261552  | -0,13730814 |  |
| 204824_at    | ENDOG           | 2,166283906  | 2,303602088  | -0,13731818 |  |
| 224060_s_at  | DPH5            | 2,166283906  | 2,303602088  | -0,13731818 |  |

|              |                |              |              |             |  |
|--------------|----------------|--------------|--------------|-------------|--|
| 1554333_at   | DNAJA4         | -3,448416261 | -3,311072652 | -0,13734361 |  |
| 215112_x_at  | MCF2L2         | -3,448416261 | -3,311072652 | -0,13734361 |  |
| 200980_s_at  | PDHA1          | 5,570819317  | 5,708169877  | -0,13735056 |  |
| 219622_at    | RAB20          | 2,491678455  | 2,629059192  | -0,13738074 |  |
| 206772_at    | PTH2R          | 2,630440446  | 2,767843855  | -0,13740341 |  |
| 209100_at    | IFRD2          | 3,466766854  | 3,604188755  | -0,1374219  |  |
| 227637_at    | TFCP2          | 1,946200473  | 2,083632167  | -0,13743169 |  |
| 221849_s_at  | DCAF15         | 2,355089531  | 2,492544876  | -0,13745534 |  |
| 1568680_s_at | YTHDC2         | -0,078265071 | 0,059218869  | -0,13748394 |  |
| 215898_at    | TTLL5          | -0,078265071 | 0,059218869  | -0,13748394 |  |
| 219897_at    | RNF122         | -0,078265071 | 0,059218869  | -0,13748394 |  |
| 229066_at    | -              | 2,614687931  | 2,752192409  | -0,13750448 |  |
| 202474_s_at  | HCFC1          | 2,456762221  | 2,594367918  | -0,1376057  |  |
| 36564_at     | RNF19B         | 0,405440979  | 0,543120284  | -0,1376793  |  |
| 218325_s_at  | DIDO1          | 1,261018186  | 1,398700978  | -0,13768279 |  |
| 234735_s_at  | USP21          | 1,261018186  | 1,398700978  | -0,13768279 |  |
| 242919_at    | ZNF253         | 1,504602299  | 1,642321262  | -0,13771896 |  |
| 214995_s_at  | APOBEC3F /// A | 0,767063567  | 0,904843258  | -0,13777969 |  |
| 217991_x_at  | SSBP3          | 1,369290453  | 1,507116528  | -0,13782607 |  |
| 219446_at    | RIC8B          | 1,369290453  | 1,507116528  | -0,13782607 |  |
| 208677_s_at  | BSG            | 3,739554414  | 3,877391565  | -0,13783715 |  |
| 210679_x_at  | -              | 1,596577845  | 1,73441697   | -0,13783913 |  |
| 223085_at    | RNF19A         | 2,314494121  | 2,452428893  | -0,13793477 |  |
| 203549_s_at  | LPL            | 0,917308734  | 1,055274826  | -0,13796609 |  |
| 233536_at    | ASXL3          | 0,917308734  | 1,055274826  | -0,13796609 |  |
| 238714_at    | -              | 0,917308734  | 1,055274826  | -0,13796609 |  |
| 218917_s_at  | ARID1A         | 4,134525941  | 4,272493466  | -0,13796753 |  |
| 222024_s_at  | AKAP13         | 0,533835206  | 0,67181667   | -0,13798146 |  |
| 240478_at    | -              | 0,533835206  | 0,67181667   | -0,13798146 |  |
| 242748_at    | SREBF2         | 0,533835206  | 0,67181667   | -0,13798146 |  |
| 209213_at    | CBR1           | 3,076146581  | 3,21415095   | -0,13800437 |  |
| 218068_s_at  | ZNF672         | 3,199783157  | 3,337798009  | -0,13801485 |  |
| 219244_s_at  | MRPL46         | 3,401961598  | 3,540009821  | -0,13804822 |  |
| 218755_at    | KIF20A         | 2,842156496  | 2,980244813  | -0,13808832 |  |
| 226925_at    | ACPL2          | 1,841816345  | 1,979940779  | -0,13812443 |  |
| 212035_s_at  | EXOC7          | 1,434549838  | 1,572742379  | -0,13819254 |  |
| 208921_s_at  | SRI            | 5,327325833  | 5,46558546   | -0,13825963 |  |
| 215616_s_at  | KDM4B          | 0,255492549  | 0,393761504  | -0,13826896 |  |
| 219561_at    | COPZ2          | 0,255492549  | 0,393761504  | -0,13826896 |  |
| 228444_at    | ARRB1          | 0,255492549  | 0,393761504  | -0,13826896 |  |
| 208994_s_at  | PPIG           | 3,274090262  | 3,412387088  | -0,13829683 |  |
| 207845_s_at  | ANAPC10        | 2,546213279  | 2,684536601  | -0,13832332 |  |
| 1556796_at   | KRBOX1-AS1     | -1,089016378 | -0,950686014 | -0,13833036 |  |
| 1558727_at   | SERP2          | -1,089016378 | -0,950686014 | -0,13833036 |  |
| 1562617_at   | LOC340074      | -1,089016378 | -0,950686014 | -0,13833036 |  |
| 204511_at    | FARP2          | -1,089016378 | -0,950686014 | -0,13833036 |  |
| 205265_s_at  | SPEG           | -1,089016378 | -0,950686014 | -0,13833036 |  |
| 205481_at    | ADORA1         | -1,089016378 | -0,950686014 | -0,13833036 |  |
| 206626_x_at  | SSX1           | -1,089016378 | -0,950686014 | -0,13833036 |  |
| 206863_x_at  | -              | -1,089016378 | -0,950686014 | -0,13833036 |  |
| 207822_at    | FGFR1          | -1,089016378 | -0,950686014 | -0,13833036 |  |
| 216629_at    | SRRM2          | -1,089016378 | -0,950686014 | -0,13833036 |  |
| 226623_at    | PHYHIP         | -1,089016378 | -0,950686014 | -0,13833036 |  |
| 227616_at    | BCL9L          | -1,089016378 | -0,950686014 | -0,13833036 |  |
| 229438_at    | -              | -1,089016378 | -0,950686014 | -0,13833036 |  |
| 229808_at    | CHAF1A         | -1,089016378 | -0,950686014 | -0,13833036 |  |

|              |                  |              |              |             |  |
|--------------|------------------|--------------|--------------|-------------|--|
| 232861_at    | PDP2             | -1,089016378 | -0,950686014 | -0,13833036 |  |
| 234536_at    | SARDH            | -1,089016378 | -0,950686014 | -0,13833036 |  |
| 236912_at    | -                | -1,089016378 | -0,950686014 | -0,13833036 |  |
| 237296_at    | -                | -1,089016378 | -0,950686014 | -0,13833036 |  |
| 241803_s_at  | -                | -1,089016378 | -0,950686014 | -0,13833036 |  |
| 242346_x_at  | -                | -1,089016378 | -0,950686014 | -0,13833036 |  |
| 225388_at    | TSPAN5           | 2,254767157  | 2,39311332   | -0,13834616 |  |
| 221775_x_at  | RPL22            | 7,314156455  | 7,452520549  | -0,13836409 |  |
| 204962_s_at  | C2orf18 /// CENP | 4,067317457  | 4,205686812  | -0,13836936 |  |
| 1559399_s_at | ZCCHC10          | 1,621313976  | 1,759685182  | -0,13837121 |  |
| 224435_at    | FAM213A          | 2,936695663  | 3,075135559  | -0,1384399  |  |
| 222404_x_at  | PTPLAD1          | 5,08401065   | 5,222461024  | -0,13845037 |  |
| 1552301_a_at | CORO6            | 0,46522187   | 0,603679647  | -0,13845778 |  |
| 201355_s_at  | BAZ2A            | 0,46522187   | 0,603679647  | -0,13845778 |  |
| 201632_at    | EIF2B1           | 3,818840142  | 3,957375745  | -0,1385356  |  |
| 212704_at    | ZCCHC11          | 2,344516784  | 2,483094137  | -0,13857735 |  |
| 1555967_at   | -                | 0,648296226  | 0,786897721  | -0,1386015  |  |
| 208839_s_at  | CAND1            | 3,471633352  | 3,61027875   | -0,1386454  |  |
| 226115_at    | AHCTF1           | 3,037284587  | 3,175947691  | -0,1386631  |  |
| 215489_x_at  | HOMER3           | 1,360921491  | 1,499637023  | -0,13871553 |  |
| 238418_at    | SLC35B4          | 2,069451339  | 2,208167653  | -0,13871631 |  |
| 229017_s_at  | DSTYK            | 2,132266459  | 2,271023131  | -0,13875667 |  |
| 204795_at    | PRR3             | 3,617524043  | 3,756298754  | -0,13877471 |  |
| 218109_s_at  | MFSD1            | 4,606162085  | 4,74496648   | -0,1388044  |  |
| 1552421_a_at | CALR3            | -1,470833215 | -1,332017329 | -0,13881589 |  |
| 220156_at    | EFCAB1           | -1,470833215 | -1,332017329 | -0,13881589 |  |
| 229681_at    | -                | -1,470833215 | -1,332017329 | -0,13881589 |  |
| 232361_s_at  | EHF              | -1,470833215 | -1,332017329 | -0,13881589 |  |
| 233083_at    | MTHFD2L          | -1,470833215 | -1,332017329 | -0,13881589 |  |
| 233544_at    | GNL1             | -1,470833215 | -1,332017329 | -0,13881589 |  |
| 236457_at    | GTDC1            | -1,470833215 | -1,332017329 | -0,13881589 |  |
| 240180_at    | -                | -1,470833215 | -1,332017329 | -0,13881589 |  |
| 244791_at    | -                | -1,470833215 | -1,332017329 | -0,13881589 |  |
| 1552806_a_at | SIGLEC10         | 1,783520648  | 1,922365006  | -0,13884436 |  |
| 201415_at    | GSS              | 4,007586951  | 4,146452482  | -0,13886553 |  |
| 1554117_at   | CCDC60           | 0,171847695  | 0,310717132  | -0,13886944 |  |
| 205432_at    | OVGP1            | 0,171847695  | 0,310717132  | -0,13886944 |  |
| 226648_at    | HIF1AN           | 2,896728217  | 3,035599287  | -0,13887107 |  |
| 213039_at    | ARHGEF18         | 2,834621043  | 2,973511251  | -0,13889021 |  |
| 213731_s_at  | TCF3             | -0,299034815 | -0,160136748 | -0,13889807 |  |
| 238208_at    | -                | -0,299034815 | -0,160136748 | -0,13889807 |  |
| 244488_at    | LSM14B           | -0,299034815 | -0,160136748 | -0,13889807 |  |
| 211724_x_at  | MIOS             | 2,701760055  | 2,840694075  | -0,13893402 |  |
| 1553279_at   | BTNL9            | 1,493160564  | 1,632095957  | -0,13893539 |  |
| 224777_s_at  | PAFAH1B2         | 4,045288912  | 4,18426834   | -0,13897943 |  |
| 1554020_at   | BICD1            | 1,672933557  | 1,811954245  | -0,13902069 |  |
| 201268_at    | NME1-NME2 /// N  | 6,333784996  | 6,472852407  | -0,13906741 |  |
| 218507_at    | HILPDA           | 3,515651309  | 3,654731437  | -0,13908013 |  |
| 1555803_a_at | C11orf57         | 1,976645579  | 2,115788273  | -0,13914269 |  |
| 209162_s_at  | PRPF4            | 3,321224383  | 3,460374487  | -0,1391501  |  |
| 224847_at    | CDK6             | 4,502028124  | 4,641295123  | -0,139267   |  |
| 200758_s_at  | NFE2L1           | 2,390468117  | 2,529740643  | -0,13927253 |  |
| 200622_x_at  | CALM1 /// CALM   | 4,047898031  | 4,187181377  | -0,13928335 |  |
| 223495_at    | CCDC8            | 1,805273023  | 1,944570415  | -0,13929739 |  |
| 214743_at    | CUX1             | 1,951783949  | 2,091116676  | -0,13933273 |  |
| 204976_s_at  | AMMECR1          | 5,532907547  | 5,672339468  | -0,13943192 |  |

|              |                 |              |              |             |  |
|--------------|-----------------|--------------|--------------|-------------|--|
| 1555427_s_at | SYNCRIP         | 3,744388178  | 3,883869861  | -0,13948168 |  |
| 1553508_at   | MDS2            | -2,64318869  | -2,503677622 | -0,13951107 |  |
| 1555335_at   | ITGA9           | -2,64318869  | -2,503677622 | -0,13951107 |  |
| 1556764_s_at | -               | -2,64318869  | -2,503677622 | -0,13951107 |  |
| 1557085_at   | PLAC1L          | -2,64318869  | -2,503677622 | -0,13951107 |  |
| 1559419_at   | CACNB2          | -2,64318869  | -2,503677622 | -0,13951107 |  |
| 1559627_at   | C7orf71         | -2,64318869  | -2,503677622 | -0,13951107 |  |
| 1561605_at   | -               | -2,64318869  | -2,503677622 | -0,13951107 |  |
| 1569492_at   | -               | -2,64318869  | -2,503677622 | -0,13951107 |  |
| 207225_at    | AANAT           | -2,64318869  | -2,503677622 | -0,13951107 |  |
| 211343_s_at  | COL13A1         | -2,64318869  | -2,503677622 | -0,13951107 |  |
| 213335_s_at  | ST3GAL6         | -2,64318869  | -2,503677622 | -0,13951107 |  |
| 220405_at    | SNTG1           | -2,64318869  | -2,503677622 | -0,13951107 |  |
| 222722_at    | OGN             | -2,64318869  | -2,503677622 | -0,13951107 |  |
| 228936_at    | -               | -2,64318869  | -2,503677622 | -0,13951107 |  |
| 231688_at    | MMP8            | -2,64318869  | -2,503677622 | -0,13951107 |  |
| 235225_at    | SCN2B           | -2,64318869  | -2,503677622 | -0,13951107 |  |
| 236331_at    | CDKL2           | -2,64318869  | -2,503677622 | -0,13951107 |  |
| 236716_at    | -               | -2,64318869  | -2,503677622 | -0,13951107 |  |
| 237259_at    | -               | -2,64318869  | -2,503677622 | -0,13951107 |  |
| 237479_at    | -               | -2,64318869  | -2,503677622 | -0,13951107 |  |
| 238632_at    | LOC100505946    | -2,64318869  | -2,503677622 | -0,13951107 |  |
| 239459_s_at  | CYP19A1 /// LOC | -2,64318869  | -2,503677622 | -0,13951107 |  |
| 240073_at    | -               | -2,64318869  | -2,503677622 | -0,13951107 |  |
| 242464_at    | -               | -2,64318869  | -2,503677622 | -0,13951107 |  |
| 243033_at    | TWF1            | -2,64318869  | -2,503677622 | -0,13951107 |  |
| 243627_at    | -               | -2,64318869  | -2,503677622 | -0,13951107 |  |
| 244838_at    | -               | -2,64318869  | -2,503677622 | -0,13951107 |  |
| 210564_x_at  | CFLAR           | 1,995690482  | 2,135226207  | -0,13953572 |  |
| 218075_at    | AAAS            | 1,995690482  | 2,135226207  | -0,13953572 |  |
| 1553257_at   | GAL3ST3         | 0,083054335  | 0,222599095  | -0,13954476 |  |
| 222269_at    | APOOL           | 0,083054335  | 0,222599095  | -0,13954476 |  |
| 222816_s_at  | ZCCHC2          | 0,083054335  | 0,222599095  | -0,13954476 |  |
| 233004_x_at  | -               | 0,083054335  | 0,222599095  | -0,13954476 |  |
| 240435_at    | ALDH1A2         | 0,083054335  | 0,222599095  | -0,13954476 |  |
| 238890_at    | BRWD1           | 0,518867317  | 0,658444279  | -0,13957696 |  |
| 1557833_at   | -               | -0,423248115 | -0,283667828 | -0,13958029 |  |
| 1563253_s_at | ERBB3           | -0,423248115 | -0,283667828 | -0,13958029 |  |
| 204293_at    | SGSH            | -0,423248115 | -0,283667828 | -0,13958029 |  |
| 210618_at    | RAP1GAP         | -0,423248115 | -0,283667828 | -0,13958029 |  |
| 213337_s_at  | SOCS1           | -0,423248115 | -0,283667828 | -0,13958029 |  |
| 218881_s_at  | FOSL2           | -0,423248115 | -0,283667828 | -0,13958029 |  |
| 221662_s_at  | SLC22A7         | -0,423248115 | -0,283667828 | -0,13958029 |  |
| 229965_at    | -               | -0,423248115 | -0,283667828 | -0,13958029 |  |
| 231276_at    | -               | -0,423248115 | -0,283667828 | -0,13958029 |  |
| 1555594_a_at | MBNL1           | 0,695652136  | 0,835239052  | -0,13958692 |  |
| 206665_s_at  | BCL2L1          | 0,695652136  | 0,835239052  | -0,13958692 |  |
| 217493_x_at  | NCR2            | 0,695652136  | 0,835239052  | -0,13958692 |  |
| 227217_at    | WNK2            | 0,695652136  | 0,835239052  | -0,13958692 |  |
| 209385_s_at  | PROSC           | 4,38308895   | 4,522690941  | -0,13960199 |  |
| 200734_s_at  | ARF3            | 2,960432227  | 3,100079607  | -0,13964738 |  |
| 212512_s_at  | CARM1           | 3,827217859  | 3,966899535  | -0,13968168 |  |
| 208768_x_at  | RPL22           | 7,282173287  | 7,421871621  | -0,13969833 |  |
| 200607_s_at  | RAD21           | 3,755604375  | 3,895315489  | -0,13971111 |  |
| 202641_at    | ARL3            | 2,436992838  | 2,576704359  | -0,13971152 |  |
| 214508_x_at  | CREM            | 1,666156729  | 1,805902329  | -0,1397456  |  |



|              |                  |              |              |             |  |
|--------------|------------------|--------------|--------------|-------------|--|
| 203125_x_at  | SLC11A2          | 1,485482016  | 1,6252386    | -0,13975658 |  |
| 1552372_at   | C4orf33          | -3,41365796  | -3,273861381 | -0,13979658 |  |
| 1557180_at   | C11orf87         | -3,41365796  | -3,273861381 | -0,13979658 |  |
| 1567246_at   | OR5H1            | -3,41365796  | -3,273861381 | -0,13979658 |  |
| 243945_at    | TRIM2            | -3,41365796  | -3,273861381 | -0,13979658 |  |
| 221206_at    | PMS2 /// PMS2C   | 2,516380342  | 2,656223838  | -0,1398435  |  |
| 221853_s_at  | NOMO1 /// NOMO   | 3,678566904  | 3,818491075  | -0,13992417 |  |
| 201701_s_at  | LOC100652849 /   | 3,277429131  | 3,417357537  | -0,13992841 |  |
| 200746_s_at  | GNB1             | 4,664280639  | 4,804227461  | -0,13994682 |  |
| 220796_x_at  | SLC35E1          | 3,837056482  | 3,977034308  | -0,13997783 |  |
| 204318_s_at  | GTSE1            | 2,348755185  | 2,488772006  | -0,14001682 |  |
| 1554534_at   | DPYD             | -0,706943342 | -0,566887459 | -0,14005588 |  |
| 204077_x_at  | ENTPD4           | -0,706943342 | -0,566887459 | -0,14005588 |  |
| 206760_s_at  | FCER2            | -0,706943342 | -0,566887459 | -0,14005588 |  |
| 215258_at    | CADM4            | -0,706943342 | -0,566887459 | -0,14005588 |  |
| 229364_at    | LOC100631377     | -0,706943342 | -0,566887459 | -0,14005588 |  |
| 229945_at    | CYHR1            | -0,706943342 | -0,566887459 | -0,14005588 |  |
| 232499_at    | ITPKB            | -0,706943342 | -0,566887459 | -0,14005588 |  |
| 234091_at    | -                | -0,706943342 | -0,566887459 | -0,14005588 |  |
| 236590_at    | -                | -0,706943342 | -0,566887459 | -0,14005588 |  |
| 240224_at    | -                | -0,706943342 | -0,566887459 | -0,14005588 |  |
| 225577_at    | HCG18            | 1,238353345  | 1,378453643  | -0,1401003  |  |
| 240111_at    | RHOBTB3          | 1,238353345  | 1,378453643  | -0,1401003  |  |
| 208853_s_at  | CANX             | 3,757996542  | 3,898162764  | -0,14016622 |  |
| 225317_at    | ACBD6            | 3,149650293  | 3,289820089  | -0,1401698  |  |
| 213511_s_at  | MTMR1            | 2,292660284  | 2,432926755  | -0,14026647 |  |
| 233177_s_at  | PNKD             | 1,795990708  | 1,936283387  | -0,14029268 |  |
| 201312_s_at  | SH3BGRL          | 4,915664747  | 5,056037987  | -0,14037324 |  |
| 227378_x_at  | C16orf13         | 2,380152406  | 2,520531219  | -0,14037881 |  |
| 201971_s_at  | ATP6V1A          | 1,917954284  | 2,058399602  | -0,14044532 |  |
| 224685_at    | MLLT4            | 1,917954284  | 2,058399602  | -0,14044532 |  |
| 220934_s_at  | TMEM223          | 2,510717331  | 2,651169275  | -0,14045194 |  |
| 205739_x_at  | ZNF107           | 2,630440446  | 2,770953871  | -0,14051343 |  |
| 238633_at    | EPC1             | 1,073999308  | 1,214517879  | -0,14051857 |  |
| 200060_s_at  | RNPS1            | 5,260285448  | 5,400809039  | -0,14052359 |  |
| 215493_x_at  | BTN2A1           | 2,540666392  | 2,681234383  | -0,14056799 |  |
| 226042_at    | EDC3             | 2,030406107  | 2,170981159  | -0,14057505 |  |
| 1552960_at   | LRRC15           | -1,518072576 | -1,377419394 | -0,14065318 |  |
| 1558378_a_at | AHNAK2           | -1,518072576 | -1,377419394 | -0,14065318 |  |
| 1561918_at   | -                | -1,518072576 | -1,377419394 | -0,14065318 |  |
| 1562036_at   | -                | -1,518072576 | -1,377419394 | -0,14065318 |  |
| 203872_at    | ACTA1            | -1,518072576 | -1,377419394 | -0,14065318 |  |
| 216362_at    | -                | -1,518072576 | -1,377419394 | -0,14065318 |  |
| 228632_at    | MEG9             | -1,518072576 | -1,377419394 | -0,14065318 |  |
| 229482_at    | DDX51            | -1,518072576 | -1,377419394 | -0,14065318 |  |
| 230720_at    | RNF182           | -1,518072576 | -1,377419394 | -0,14065318 |  |
| 232270_at    | C9orf3 /// LOC10 | -1,518072576 | -1,377419394 | -0,14065318 |  |
| 233574_at    | BCORL1           | -1,518072576 | -1,377419394 | -0,14065318 |  |
| 236626_at    | ALG1             | -1,518072576 | -1,377419394 | -0,14065318 |  |
| 238251_at    | -                | -1,518072576 | -1,377419394 | -0,14065318 |  |
| 239954_at    | ZNF160           | -1,518072576 | -1,377419394 | -0,14065318 |  |
| 201993_x_at  | HNRPD            | 5,800328718  | 5,941018684  | -0,14068997 |  |
| 233864_s_at  | VPS35            | 3,891817836  | 4,032509762  | -0,14069193 |  |
| 235034_at    | VTI1A            | 0,792179257  | 0,932882274  | -0,14070302 |  |
| 203778_at    | MANBA            | 2,68509622   | 2,825817328  | -0,14072111 |  |
| 227860_at    | CPXM1            | 1,269985355  | 1,410714371  | -0,14072902 |  |

|              |                |              |              |             |  |
|--------------|----------------|--------------|--------------|-------------|--|
| 230070_at    | CNIH2          | 1,269985355  | 1,410714371  | -0,14072902 |  |
| 238472_at    | FBXO9          | 1,269985355  | 1,410714371  | -0,14072902 |  |
| 1555486_a_at | PRR5L          | 0,376672223  | 0,51742585   | -0,14075363 |  |
| 219052_at    | HPS6           | 2,232003119  | 2,372786857  | -0,14078374 |  |
| 211454_x_at  | FKSG49         | 2,938102794  | 3,078904771  | -0,14080198 |  |
| 1560271_at   | -              | 0,627515113  | 0,768343791  | -0,14082868 |  |
| 221704_s_at  | VPS37B         | 2,669932407  | 2,810785576  | -0,14085317 |  |
| 229448_at    | CERS1 /// GDF1 | 1,027166904  | 1,16809119   | -0,14092429 |  |
| 223534_s_at  | RPS6KL1        | 0,152582607  | 0,293518836  | -0,14093623 |  |
| 239204_at    | ZNF75A         | 0,152582607  | 0,293518836  | -0,14093623 |  |
| 224902_at    | PDPR           | 2,536956583  | 2,677924589  | -0,14096801 |  |
| 219974_x_at  | ECHDC1         | 4,131454119  | 4,272493466  | -0,14103935 |  |
| 232628_at    | -              | 0,888485433  | 1,029536893  | -0,14105146 |  |
| 1556287_a_at | -              | -2,597496523 | -2,456406426 | -0,1410901  |  |
| 1557297_at   | -              | -2,597496523 | -2,456406426 | -0,1410901  |  |
| 1565638_at   | -              | -2,597496523 | -2,456406426 | -0,1410901  |  |
| 1567238_at   | OR2L2          | -2,597496523 | -2,456406426 | -0,1410901  |  |
| 204814_at    | CADPS          | -2,597496523 | -2,456406426 | -0,1410901  |  |
| 205365_at    | HOXB6          | -2,597496523 | -2,456406426 | -0,1410901  |  |
| 206974_at    | CXCR6          | -2,597496523 | -2,456406426 | -0,1410901  |  |
| 209956_s_at  | CAMK2B         | -2,597496523 | -2,456406426 | -0,1410901  |  |
| 209987_s_at  | ASCL1          | -2,597496523 | -2,456406426 | -0,1410901  |  |
| 213183_s_at  | CDKN1C         | -2,597496523 | -2,456406426 | -0,1410901  |  |
| 226492_at    | SEMA6D         | -2,597496523 | -2,456406426 | -0,1410901  |  |
| 226939_at    | CPEB2          | -2,597496523 | -2,456406426 | -0,1410901  |  |
| 232414_at    | HEATR1         | -2,597496523 | -2,456406426 | -0,1410901  |  |
| 232454_at    | -              | -2,597496523 | -2,456406426 | -0,1410901  |  |
| 234634_at    | -              | -2,597496523 | -2,456406426 | -0,1410901  |  |
| 238415_at    | -              | -2,597496523 | -2,456406426 | -0,1410901  |  |
| 240474_x_at  | -              | -2,597496523 | -2,456406426 | -0,1410901  |  |
| 244675_at    | RGS8           | -2,597496523 | -2,456406426 | -0,1410901  |  |
| 244783_at    | YAF2           | -2,597496523 | -2,456406426 | -0,1410901  |  |
| 225234_at    | CBL            | 1,62481334   | 1,765933685  | -0,14112034 |  |
| 203846_at    | TRIM32         | 2,190100188  | 2,331254065  | -0,14115388 |  |
| 206483_at    | LRRC6          | -0,112808516 | 0,028364014  | -0,14117253 |  |
| 226074_at    | PPM1M          | -0,112808516 | 0,028364014  | -0,14117253 |  |
| 227750_at    | KALRN          | -0,112808516 | 0,028364014  | -0,14117253 |  |
| 221538_s_at  | PLXNA1         | 4,21392401   | 4,355114902  | -0,14119089 |  |
| 204492_at    | ARHGAP11A      | 0,735041319  | 0,876248481  | -0,14120716 |  |
| 213788_s_at  | LINC00094      | 0,735041319  | 0,876248481  | -0,14120716 |  |
| 236219_at    | SLC35G1        | 0,735041319  | 0,876248481  | -0,14120716 |  |
| 225503_at    | DHRX           | 1,534677255  | 1,675891488  | -0,14121423 |  |
| 202313_at    | PPP2R2A        | 4,993521137  | 5,134798917  | -0,14127778 |  |
| 216063_at    | HBBP1          | 5,316276373  | 5,457645686  | -0,14136931 |  |
| 212248_at    | MTDH           | 3,48613512   | 3,62753841   | -0,14140329 |  |
| 203262_s_at  | FAM50A         | 2,943717636  | 3,08516499   | -0,14144735 |  |
| 224577_at    | ERGIC1         | 1,732533761  | 1,874012195  | -0,14147843 |  |
| 222989_s_at  | UBQLN1         | 3,577453376  | 3,718943256  | -0,14148988 |  |
| 209226_s_at  | TNPO1          | 3,959896375  | 4,101455318  | -0,14155894 |  |
| 225271_at    | TMEM63B        | 1,649074067  | 1,790660532  | -0,14158647 |  |
| 226941_at    | ATF6           | 2,605861638  | 2,747463672  | -0,14160203 |  |
| 32099_at     | SAFB2          | 3,846828463  | 3,988434969  | -0,14160651 |  |
| 210959_s_at  | SRD5A1         | 1,883312263  | 2,024923328  | -0,14161106 |  |
| 214336_s_at  | COPA           | 1,560488174  | 1,702196344  | -0,14170817 |  |
| 225135_at    | SIN3A          | 2,929639344  | 3,071356473  | -0,14171713 |  |
| 208920_at    | SRI            | 0,67554678   | 0,817300337  | -0,14175356 |  |

|              |                   |              |              |             |  |
|--------------|-------------------|--------------|--------------|-------------|--|
| 222003_s_at  | DOCK6             | 0,67554678   | 0,817300337  | -0,14175356 |  |
| 396_f_at     | EPOR              | 3,255587071  | 3,39737216   | -0,14178509 |  |
| 223425_at    | RAVER1            | 2,845159691  | 2,986947093  | -0,1417874  |  |
| 207856_s_at  | LOC150776 /// S   | 2,14450783   | 2,286318242  | -0,14181041 |  |
| 217645_at    | COX16 /// SYNJ2   | 1,46610492   | 1,60795124   | -0,14184632 |  |
| 218113_at    | TMEM2             | 2,182996494  | 2,324919719  | -0,14192322 |  |
| 226745_at    | CYP4V2            | 0,97328325   | 1,115234684  | -0,14195143 |  |
| 222032_s_at  | USP7              | 0,496120222  | 0,638150376  | -0,14203015 |  |
| 233713_at    | -                 | 0,496120222  | 0,638150376  | -0,14203015 |  |
| 244024_at    | ZNF182            | 0,496120222  | 0,638150376  | -0,14203015 |  |
| 202225_at    | CRK               | 3,55745065   | 3,69948842   | -0,14203777 |  |
| 202681_at    | C3orf62 /// MIR42 | 3,049053496  | 3,191118448  | -0,14206495 |  |
| 35254_at     | TRAFD1            | 2,579054066  | 2,721174878  | -0,14212081 |  |
| 1557601_s_at | KIAA1257 /// LOC  | -0,221656139 | -0,079522948 | -0,14213319 |  |
| 206327_s_at  | CDH15             | -0,221656139 | -0,079522948 | -0,14213319 |  |
| 215640_at    | TBC1D2B           | -0,221656139 | -0,079522948 | -0,14213319 |  |
| 216584_at    | -                 | -0,221656139 | -0,079522948 | -0,14213319 |  |
| 217348_x_at  | ARHGEF15          | -0,221656139 | -0,079522948 | -0,14213319 |  |
| 232333_at    | -                 | -0,221656139 | -0,079522948 | -0,14213319 |  |
| 236066_at    | -                 | -0,221656139 | -0,079522948 | -0,14213319 |  |
| 238547_at    | HEXIM2            | -0,221656139 | -0,079522948 | -0,14213319 |  |
| 36553_at     | ASMTL             | 3,455019843  | 3,597197134  | -0,14217729 |  |
| 210580_x_at  | SLX1A-SULT1A3     | 2,310153708  | 2,452428893  | -0,14227519 |  |
| 226423_at    | PAQR8             | 2,310153708  | 2,452428893  | -0,14227519 |  |
| 218603_at    | HECA              | 2,840652551  | 2,982929462  | -0,14227691 |  |
| 1560528_at   | -                 | -3,37835     | -3,236070201 | -0,1422798  |  |
| 1564158_a_at | LOC100130894      | -3,37835     | -3,236070201 | -0,1422798  |  |
| 1569040_s_at | ANKRD36BP2        | -3,37835     | -3,236070201 | -0,1422798  |  |
| 224341_x_at  | TLR4              | -3,37835     | -3,236070201 | -0,1422798  |  |
| 235952_at    | -                 | -3,37835     | -3,236070201 | -0,1422798  |  |
| 203349_s_at  | ETV5              | 3,025418883  | 3,16771226   | -0,14229338 |  |
| 222529_at    | SLC25A37          | 4,958242092  | 5,100598462  | -0,14235637 |  |
| 242558_at    | -                 | 1,326951551  | 1,469325098  | -0,14237355 |  |
| 1557038_s_at | UBAC2-AS1         | 0,291166226  | 0,433557298  | -0,14239107 |  |
| 242043_s_at  | -                 | 0,291166226  | 0,433557298  | -0,14239107 |  |
| 205443_at    | SNAPC1            | 2,683419202  | 2,825817328  | -0,14239813 |  |
| 229002_at    | FAM69B            | 3,436222554  | 3,578681277  | -0,14245872 |  |
| 216033_s_at  | FYN               | 1,394109935  | 1,536652708  | -0,14254277 |  |
| 217988_at    | CCNB1IP1          | 4,455622373  | 4,59817199   | -0,14254962 |  |
| 1553486_a_at | C17orf78          | -2,551294263 | -2,408705138 | -0,14258913 |  |
| 1556493_a_at | KDM4C             | -2,551294263 | -2,408705138 | -0,14258913 |  |
| 1557305_at   | TACC1             | -2,551294263 | -2,408705138 | -0,14258913 |  |
| 1567223_at   | HMGA2             | -2,551294263 | -2,408705138 | -0,14258913 |  |
| 1568488_at   | -                 | -2,551294263 | -2,408705138 | -0,14258913 |  |
| 1568844_at   | -                 | -2,551294263 | -2,408705138 | -0,14258913 |  |
| 214645_at    | -                 | -2,551294263 | -2,408705138 | -0,14258913 |  |
| 216618_at    | -                 | -2,551294263 | -2,408705138 | -0,14258913 |  |
| 224379_at    | FTHL17            | -2,551294263 | -2,408705138 | -0,14258913 |  |
| 235518_at    | SLC8A1            | -2,551294263 | -2,408705138 | -0,14258913 |  |
| 236276_at    | -                 | -2,551294263 | -2,408705138 | -0,14258913 |  |
| 239664_at    | -                 | -2,551294263 | -2,408705138 | -0,14258913 |  |
| 242613_at    | -                 | -2,551294263 | -2,408705138 | -0,14258913 |  |
| 243578_at    | -                 | -2,551294263 | -2,408705138 | -0,14258913 |  |
| 243907_at    | -                 | -2,551294263 | -2,408705138 | -0,14258913 |  |
| 227813_at    | THAP6             | 1,011212064  | 1,153866761  | -0,1426547  |  |
| 204981_at    | SLC22A18          | 1,774096855  | 1,916759838  | -0,14266298 |  |

|              |                  |              |             |             |  |
|--------------|------------------|--------------|-------------|-------------|--|
| 202643_s_at  | TNFAIP3          | -0,033456564 | 0,109221392 | -0,14267796 |  |
| 216455_at    | -                | -0,033456564 | 0,109221392 | -0,14267796 |  |
| 219239_s_at  | ZNF654           | -0,033456564 | 0,109221392 | -0,14267796 |  |
| 219051_x_at  | METRNL           | 0,425644434  | 0,568365095 | -0,14272066 |  |
| 243356_at    | -                | 0,425644434  | 0,568365095 | -0,14272066 |  |
| 202990_at    | PYGL             | 4,539590968  | 4,682340969 | -0,14275    |  |
| 206503_x_at  | PML              | 1,69307511   | 1,835911187 | -0,14283608 |  |
| 208315_x_at  | TRAF3            | 0,87091093   | 1,013870809 | -0,14295988 |  |
| 209011_at    | TRIO             | 0,87091093   | 1,013870809 | -0,14295988 |  |
| 209415_at    | FZR1             | 0,87091093   | 1,013870809 | -0,14295988 |  |
| 218260_at    | DDA1             | 3,01878441   | 3,161800893 | -0,14301648 |  |
| 226221_at    | KIAA1432         | 1,940595304  | 2,083632167 | -0,14303686 |  |
| 208813_at    | GOT1             | 3,548266005  | 3,691304166 | -0,14303816 |  |
| 217781_s_at  | ZFP106           | 3,050355245  | 3,193438316 | -0,14308307 |  |
| 204674_at    | LRMP             | 1,454352496  | 1,59747851  | -0,14312601 |  |
| 210527_x_at  | TUBA3C /// TUBA  | 1,454352496  | 1,59747851  | -0,14312601 |  |
| 202728_s_at  | LTBP1            | 0,962260738  | 1,105412836 | -0,1431521  |  |
| 200966_x_at  | ALDOA            | 7,099788048  | 7,242951545 | -0,1431635  |  |
| 201494_at    | PRCP             | 3,469688722  | 3,6128809   | -0,14319218 |  |
| 218838_s_at  | TTC31            | 1,868628927  | 2,011838132 | -0,14320921 |  |
| 1553046_s_at | GAL3ST2          | 0,209623097  | 0,352836757 | -0,14321366 |  |
| 227308_x_at  | LTBP3            | 0,209623097  | 0,352836757 | -0,14321366 |  |
| 233511_at    | -                | 0,209623097  | 0,352836757 | -0,14321366 |  |
| 212792_at    | DPY19L1          | 2,72965419   | 2,87289275  | -0,14323856 |  |
| 209160_at    | AKR1C3           | 1,515954005  | 1,659204017 | -0,14325001 |  |
| 212414_s_at  | GLYR1 /// SEPT6  | 1,515954005  | 1,659204017 | -0,14325001 |  |
| 234005_x_at  | STK36            | 1,515954005  | 1,659204017 | -0,14325001 |  |
| 219599_at    | EIF4B /// LOC100 | 2,208874124  | 2,352169913 | -0,14329579 |  |
| 227301_at    | CCT6P1 /// CCT6  | 2,208874124  | 2,352169913 | -0,14329579 |  |
| 1568408_x_at | -                | 2,069451339  | 2,212749286 | -0,14329795 |  |
| 226737_at    | SLC25A42         | 1,318332599  | 1,461646549 | -0,14331395 |  |
| 221922_at    | GPSM2            | 1,04816921   | 1,191491281 | -0,14332207 |  |
| 209962_at    | EPOR             | 3,120200849  | 3,263564154 | -0,14336331 |  |
| 228429_x_at  | KIF9             | 3,207971844  | 3,351366359 | -0,14339452 |  |
| 241348_at    | ZNF654           | 1,129248302  | 1,272721751 | -0,14347345 |  |
| 243009_at    | -                | 0,351548291  | 0,495031851 | -0,14348356 |  |
| 200921_s_at  | BTG1             | 3,401961598  | 3,545468469 | -0,14350687 |  |
| 207630_s_at  | CREM             | 2,450859799  | 2,594367918 | -0,14350812 |  |
| 222641_s_at  | FAM222B          | 0,911589958  | 1,055274826 | -0,14368487 |  |
| 224652_at    | CCNY             | 3,579258128  | 3,722963534 | -0,14370541 |  |
| 1554015_a_at | CHD2             | 0,480753764  | 0,624460759 | -0,143707   |  |
| 212516_at    | ARAP1            | 0,480753764  | 0,624460759 | -0,143707   |  |
| 1554234_at   | KATNAL2          | -0,136301282 | 0,007421914 | -0,1437232  |  |
| 207398_at    | HOXD13           | -0,136301282 | 0,007421914 | -0,1437232  |  |
| 225687_at    | FAM83D           | 4,195216101  | 4,338964815 | -0,14374871 |  |
| 212584_at    | AQR              | 3,340506684  | 3,484256382 | -0,1437497  |  |
| 203273_s_at  | TUSC2            | 2,600539826  | 2,744302548 | -0,14376272 |  |
| 223682_s_at  | EIF1AD           | 2,022468633  | 2,166264721 | -0,14379609 |  |
| 209507_at    | RPA3             | 4,556180348  | 4,699988715 | -0,14380837 |  |
| 202315_s_at  | BCR              | 1,000476627  | 1,144305291 | -0,14382866 |  |
| 205279_s_at  | GLRB             | 1,000476627  | 1,144305291 | -0,14382866 |  |
| 201164_s_at  | PUM1             | 3,471633352  | 3,615478364 | -0,14384501 |  |
| 202967_at    | GSTA4            | 2,064305961  | 2,208167653 | -0,14386169 |  |
| 212020_s_at  | MKI67            | 1,381753566  | 1,525647381 | -0,14389381 |  |
| 224720_at    | MIB1             | 3,41414682   | 3,558125564 | -0,14397874 |  |
| 208913_at    | GGA2             | 1,954567604  | 2,098562556 | -0,14399495 |  |

|              |                 |              |              |             |  |
|--------------|-----------------|--------------|--------------|-------------|--|
| 209930_s_at  | NFE2            | 3,405017566  | 3,549096127  | -0,14407856 |  |
| 212835_at    | FAM175B         | 2,238870125  | 2,382985886  | -0,14411576 |  |
| 234107_s_at  | DTD1            | 3,266269388  | 3,410394103  | -0,14412472 |  |
| 241114_s_at  | -               | 0,123193849  | 0,26733076   | -0,14413691 |  |
| 213095_x_at  | AIF1            | 1,835789711  | 1,979940779  | -0,14415107 |  |
| 218450_at    | HEBP1           | 1,835789711  | 1,979940779  | -0,14415107 |  |
| 227837_at    | LOC729570       | 1,835789711  | 1,979940779  | -0,14415107 |  |
| 209881_s_at  | LAT             | 2,87191078   | 3,016072743  | -0,14416196 |  |
| 1554969_x_at | DIP2A           | -0,467091869 | -0,322870281 | -0,14422159 |  |
| 1566987_s_at | LOC100499466    | -0,467091869 | -0,322870281 | -0,14422159 |  |
| 207344_at    | AKAP3           | -0,467091869 | -0,322870281 | -0,14422159 |  |
| 212686_at    | PPM1H           | -0,467091869 | -0,322870281 | -0,14422159 |  |
| 221314_at    | GDF9            | -0,467091869 | -0,322870281 | -0,14422159 |  |
| 223582_at    | GPR98           | -0,467091869 | -0,322870281 | -0,14422159 |  |
| 234158_at    | -               | -0,467091869 | -0,322870281 | -0,14422159 |  |
| 239474_at    | -               | -0,467091869 | -0,322870281 | -0,14422159 |  |
| 242449_at    | -               | -0,467091869 | -0,322870281 | -0,14422159 |  |
| 224743_at    | IMPAD1          | 3,822654227  | 3,966899535  | -0,14424531 |  |
| 217784_at    | YKT6            | 2,732900676  | 2,877228323  | -0,14432765 |  |
| 214885_at    | KAT8            | 0,273439642  | 0,417770464  | -0,14433082 |  |
| 239368_at    | -               | 0,273439642  | 0,417770464  | -0,14433082 |  |
| 240443_at    | -               | 0,273439642  | 0,417770464  | -0,14433082 |  |
| 204328_at    | TMC6            | 1,706348269  | 1,85068474   | -0,14433647 |  |
| 201703_s_at  | PPP1R10         | 2,520143371  | 2,664608955  | -0,14446558 |  |
| 200692_s_at  | HSPA9           | 5,165558455  | 5,310052924  | -0,14449447 |  |
| 64899_at     | LPPR2           | 2,926098199  | 3,070725662  | -0,14462746 |  |
| 208120_x_at  | FKSG49 /// LOC1 | 3,025418883  | 3,170070041  | -0,14465116 |  |
| 224958_at    | NUFIP2          | 1,67631007   | 1,820984782  | -0,14467471 |  |
| 226356_at    | FAM73B          | 1,233777334  | 1,378453643  | -0,14467631 |  |
| 223052_x_at  | -               | 0,592200562  | 0,73688026   | -0,1446797  |  |
| 212027_at    | RBM25           | 3,056846434  | 3,201528602  | -0,14468217 |  |
| 215236_s_at  | PICALM          | 3,67603922   | 3,820743792  | -0,14470457 |  |
| 1557037_a_at | UBAC2-AS1       | -2,479842156 | -2,335104118 | -0,14473804 |  |
| 1562740_at   | DNAJB8-AS1      | -2,479842156 | -2,335104118 | -0,14473804 |  |
| 1569785_at   | -               | -2,479842156 | -2,335104118 | -0,14473804 |  |
| 1570261_at   | -               | -2,479842156 | -2,335104118 | -0,14473804 |  |
| 208331_at    | BPY2            | -2,479842156 | -2,335104118 | -0,14473804 |  |
| 212353_at    | SULF1           | -2,479842156 | -2,335104118 | -0,14473804 |  |
| 216797_at    | -               | -2,479842156 | -2,335104118 | -0,14473804 |  |
| 221138_s_at  | -               | -2,479842156 | -2,335104118 | -0,14473804 |  |
| 229357_at    | ADAMTS5         | -2,479842156 | -2,335104118 | -0,14473804 |  |
| 232823_at    | -               | -2,479842156 | -2,335104118 | -0,14473804 |  |
| 234458_at    | ANPEP           | -2,479842156 | -2,335104118 | -0,14473804 |  |
| 238409_x_at  | OXR1            | -2,479842156 | -2,335104118 | -0,14473804 |  |
| 239649_at    | -               | -2,479842156 | -2,335104118 | -0,14473804 |  |
| 240308_at    | -               | -2,479842156 | -2,335104118 | -0,14473804 |  |
| 240822_at    | TDP1            | -2,479842156 | -2,335104118 | -0,14473804 |  |
| 241869_at    | APOL6           | -2,479842156 | -2,335104118 | -0,14473804 |  |
| 242360_at    | LDB2            | -2,479842156 | -2,335104118 | -0,14473804 |  |
| 242588_at    | -               | -2,479842156 | -2,335104118 | -0,14473804 |  |
| 243923_at    | -               | -2,479842156 | -2,335104118 | -0,14473804 |  |
| 228793_at    | JMJD1C          | 0,702292136  | 0,847075464  | -0,14478333 |  |
| 225898_at    | WDR54           | 1,805273023  | 1,950068772  | -0,14479575 |  |
| 201311_s_at  | SH3BGR1         | 3,792633459  | 3,937445604  | -0,14481214 |  |
| 1554480_a_at | ARMC10          | 3,06588531   | 3,210719429  | -0,14483412 |  |
| 218418_s_at  | KANK2           | 4,268634793  | 4,413495123  | -0,14486033 |  |

|              |                  |              |              |             |  |
|--------------|------------------|--------------|--------------|-------------|--|
| 201337_s_at  | VAMP3            | 2,979690938  | 3,124599694  | -0,14490876 |  |
| 1553946_at   | DCD              | -1,639579028 | -1,494668682 | -0,14491035 |  |
| 1559595_at   | LOC728084        | -1,639579028 | -1,494668682 | -0,14491035 |  |
| 1561148_at   | -                | -1,639579028 | -1,494668682 | -0,14491035 |  |
| 206886_x_at  | GH1              | -1,639579028 | -1,494668682 | -0,14491035 |  |
| 207058_s_at  | PARK2            | -1,639579028 | -1,494668682 | -0,14491035 |  |
| 207676_at    | ONECUT2          | -1,639579028 | -1,494668682 | -0,14491035 |  |
| 211067_s_at  | GAS7             | -1,639579028 | -1,494668682 | -0,14491035 |  |
| 217474_at    | -                | -1,639579028 | -1,494668682 | -0,14491035 |  |
| 219977_at    | AIPL1            | -1,639579028 | -1,494668682 | -0,14491035 |  |
| 233817_at    | -                | -1,639579028 | -1,494668682 | -0,14491035 |  |
| 234144_at    | -                | -1,639579028 | -1,494668682 | -0,14491035 |  |
| 235062_at    | PIH1D2           | -1,639579028 | -1,494668682 | -0,14491035 |  |
| 240933_at    | -                | -1,639579028 | -1,494668682 | -0,14491035 |  |
| 233208_x_at  | CPSF2            | 3,582860873  | 3,727773127  | -0,14491225 |  |
| 223051_at    | SSU72            | 4,611022217  | 4,755995187  | -0,14497297 |  |
| 215000_s_at  | FEZ2             | 3,413135307  | 3,558125564  | -0,14499026 |  |
| 203514_at    | MAP3K3           | 2,114952142  | 2,259997914  | -0,14504577 |  |
| 224333_s_at  | MRPS5            | 3,420201053  | 3,565308644  | -0,14510759 |  |
| 229384_at    | -                | 2,28383338   | 2,428994491  | -0,14516111 |  |
| 215085_x_at  | DLEC1            | 0,03125738   | 0,176436073  | -0,14517869 |  |
| 244180_at    | ZNF793           | 0,03125738   | 0,176436073  | -0,14517869 |  |
| 1554538_at   | RHOF             | -0,759588698 | -0,614371577 | -0,14521712 |  |
| 1555236_a_at | PGC              | -0,759588698 | -0,614371577 | -0,14521712 |  |
| 1557507_at   | LOC100507602     | -0,759588698 | -0,614371577 | -0,14521712 |  |
| 1566138_at   | -                | -0,759588698 | -0,614371577 | -0,14521712 |  |
| 218966_at    | MYO5C            | -0,759588698 | -0,614371577 | -0,14521712 |  |
| 225122_at    | RNF31            | -0,759588698 | -0,614371577 | -0,14521712 |  |
| 233245_at    | UHRF1BP1         | -0,759588698 | -0,614371577 | -0,14521712 |  |
| 238353_at    | RASL11A          | -0,759588698 | -0,614371577 | -0,14521712 |  |
| 225127_at    | TMEM181          | 2,776027875  | 2,921282473  | -0,1452546  |  |
| 216607_s_at  | CYP51A1 /// LRR  | 2,849652795  | 2,994948944  | -0,14529615 |  |
| 179_at       | DTX2P1-UPK3B     | 2,512607472  | 2,657904765  | -0,14529729 |  |
| 214962_s_at  | NUP160           | 0,334552598  | 0,479907041  | -0,14535444 |  |
| 219255_x_at  | IL17RB           | 0,334552598  | 0,479907041  | -0,14535444 |  |
| 222799_at    | WDR91            | 0,334552598  | 0,479907041  | -0,14535444 |  |
| 222640_at    | DNMT3A           | 2,190100188  | 2,335461563  | -0,14536138 |  |
| 1558761_a_at | FAM120AOS        | 1,556829052  | 1,702196344  | -0,14536729 |  |
| 216210_x_at  | TRIOBP           | 1,556829052  | 1,702196344  | -0,14536729 |  |
| 201914_s_at  | SEC63            | 2,986507217  | 3,131875186  | -0,14536797 |  |
| 220411_x_at  | PODNL1           | 0,641402394  | 0,786897721  | -0,14549533 |  |
| 244457_at    | -                | 0,747935635  | 0,893473268  | -0,14553763 |  |
| 219483_s_at  | PORCN            | 0,984222186  | 1,129843209  | -0,14562102 |  |
| 236328_at    | ZFP112 /// ZNF28 | 0,984222186  | 1,129843209  | -0,14562102 |  |
| 232075_at    | WDR61            | 2,206540699  | 2,352169913  | -0,14562921 |  |
| 226659_at    | DEF6             | 1,224581536  | 1,370274469  | -0,14569293 |  |
| 236565_s_at  | LARP6            | 1,224581536  | 1,370274469  | -0,14569293 |  |
| 49306_at     | RASSF4           | -2,492168269 | -2,346352505 | -0,14581576 |  |
| 214736_s_at  | ADD1             | 1,820612054  | 1,966439221  | -0,14582717 |  |
| 222479_s_at  | DYNC1LI1         | 3,731461974  | 3,877391565  | -0,14592959 |  |
| 217848_s_at  | PPA1             | 6,156101254  | 6,302043431  | -0,14594218 |  |
| 1559945_at   | RUVBL2           | -1,196375121 | -1,050406615 | -0,14596851 |  |
| 1564753_at   | -                | -1,196375121 | -1,050406615 | -0,14596851 |  |
| 1570454_at   | EIF4EBP2         | -1,196375121 | -1,050406615 | -0,14596851 |  |
| 209032_s_at  | CADM1            | -1,196375121 | -1,050406615 | -0,14596851 |  |
| 217079_at    | -                | -1,196375121 | -1,050406615 | -0,14596851 |  |

|              |                   |              |              |             |  |
|--------------|-------------------|--------------|--------------|-------------|--|
| 222345_at    | -                 | -1,196375121 | -1,050406615 | -0,14596851 |  |
| 228848_at    | ABTB1             | -1,196375121 | -1,050406615 | -0,14596851 |  |
| 233776_at    | -                 | -1,196375121 | -1,050406615 | -0,14596851 |  |
| 236455_at    | -                 | -1,196375121 | -1,050406615 | -0,14596851 |  |
| 240759_at    | -                 | -1,196375121 | -1,050406615 | -0,14596851 |  |
| 241358_at    | WFIKK2            | -1,196375121 | -1,050406615 | -0,14596851 |  |
| 242316_at    | TMOD3             | -1,196375121 | -1,050406615 | -0,14596851 |  |
| 242566_at    | VASH1             | -1,196375121 | -1,050406615 | -0,14596851 |  |
| 1552860_at   | LOC100506888 /    | -2,43257096  | -2,286583451 | -0,14598751 |  |
| 1559429_a_at | C3orf43           | -2,43257096  | -2,286583451 | -0,14598751 |  |
| 1559735_at   | -                 | -2,43257096  | -2,286583451 | -0,14598751 |  |
| 1562297_at   | -                 | -2,43257096  | -2,286583451 | -0,14598751 |  |
| 1566124_a_at | FABP6             | -2,43257096  | -2,286583451 | -0,14598751 |  |
| 204609_at    | CCDC85B           | -2,43257096  | -2,286583451 | -0,14598751 |  |
| 206947_at    | B3GALT5           | -2,43257096  | -2,286583451 | -0,14598751 |  |
| 209541_at    | IGF1              | -2,43257096  | -2,286583451 | -0,14598751 |  |
| 211437_at    | -                 | -2,43257096  | -2,286583451 | -0,14598751 |  |
| 211641_x_at  | IGHA1 /// IGH2    | -2,43257096  | -2,286583451 | -0,14598751 |  |
| 214199_at    | SFTPD             | -2,43257096  | -2,286583451 | -0,14598751 |  |
| 214493_s_at  | INADL             | -2,43257096  | -2,286583451 | -0,14598751 |  |
| 214547_at    | ADCY10            | -2,43257096  | -2,286583451 | -0,14598751 |  |
| 214597_at    | SSTR2             | -2,43257096  | -2,286583451 | -0,14598751 |  |
| 216290_x_at  | -                 | -2,43257096  | -2,286583451 | -0,14598751 |  |
| 216622_at    | LAMB4             | -2,43257096  | -2,286583451 | -0,14598751 |  |
| 218002_s_at  | CXCL14            | -2,43257096  | -2,286583451 | -0,14598751 |  |
| 220318_at    | EPN3              | -2,43257096  | -2,286583451 | -0,14598751 |  |
| 220551_at    | SLC17A6           | -2,43257096  | -2,286583451 | -0,14598751 |  |
| 220986_s_at  | TIGD6             | -2,43257096  | -2,286583451 | -0,14598751 |  |
| 221085_at    | TNFSF15           | -2,43257096  | -2,286583451 | -0,14598751 |  |
| 228056_s_at  | NAPSB             | -2,43257096  | -2,286583451 | -0,14598751 |  |
| 229137_at    | FUCA1             | -2,43257096  | -2,286583451 | -0,14598751 |  |
| 230829_at    | CST9L             | -2,43257096  | -2,286583451 | -0,14598751 |  |
| 233172_at    | -                 | -2,43257096  | -2,286583451 | -0,14598751 |  |
| 237697_at    | LOC100506403 /    | -2,43257096  | -2,286583451 | -0,14598751 |  |
| 237816_at    | -                 | -2,43257096  | -2,286583451 | -0,14598751 |  |
| 240207_at    | -                 | -2,43257096  | -2,286583451 | -0,14598751 |  |
| 201635_s_at  | FXR1              | 3,345817457  | 3,491815843  | -0,14599839 |  |
| 1562607_at   | -                 | -3,32387526  | -3,177802286 | -0,14607297 |  |
| 1562916_at   | LINC00102         | -3,32387526  | -3,177802286 | -0,14607297 |  |
| 1563881_at   | MAGI1             | -3,32387526  | -3,177802286 | -0,14607297 |  |
| 207912_s_at  | DAZ1 /// DAZ2 /// | -3,32387526  | -3,177802286 | -0,14607297 |  |
| 223234_at    | MAD2L2            | 3,579258128  | 3,725370335  | -0,14611221 |  |
| 202654_x_at  | 07.03.15          | 2,621710292  | 2,767843855  | -0,14613356 |  |
| 209526_s_at  | HDGFRP3           | 2,043538949  | 2,189694216  | -0,14615527 |  |
| 206073_at    | COLQ              | 1,689737652  | 1,835911187  | -0,14617353 |  |
| 1562228_s_at | PDE5A             | -0,366776884 | -0,220592223 | -0,14618466 |  |
| 1570243_at   | -                 | -0,366776884 | -0,220592223 | -0,14618466 |  |
| 205258_at    | INHBB             | -0,366776884 | -0,220592223 | -0,14618466 |  |
| 213613_s_at  | NADK              | -0,366776884 | -0,220592223 | -0,14618466 |  |
| 216145_at    | -                 | -0,366776884 | -0,220592223 | -0,14618466 |  |
| 217399_s_at  | FOXO3 /// FOXO    | -0,366776884 | -0,220592223 | -0,14618466 |  |
| 219697_at    | HS3ST2            | -0,366776884 | -0,220592223 | -0,14618466 |  |
| 221097_s_at  | KCNMB2            | -0,366776884 | -0,220592223 | -0,14618466 |  |
| 224260_at    | -                 | -0,366776884 | -0,220592223 | -0,14618466 |  |
| 234496_x_at  | NYX               | -0,366776884 | -0,220592223 | -0,14618466 |  |
| 236367_at    | SMG7              | -0,366776884 | -0,220592223 | -0,14618466 |  |

|              |                  |              |              |             |  |
|--------------|------------------|--------------|--------------|-------------|--|
| 237276_at    | -                | -0,366776884 | -0,220592223 | -0,14618466 |  |
| 1554712_a_at | GLYATL2          | -1,688127507 | -1,541908042 | -0,14621946 |  |
| 1555252_a_at | TRPM3            | -1,688127507 | -1,541908042 | -0,14621946 |  |
| 1560031_at   | FRMD4A           | -1,688127507 | -1,541908042 | -0,14621946 |  |
| 206363_at    | MAF              | -1,688127507 | -1,541908042 | -0,14621946 |  |
| 208087_s_at  | ZBP1             | -1,688127507 | -1,541908042 | -0,14621946 |  |
| 210342_s_at  | TPO              | -1,688127507 | -1,541908042 | -0,14621946 |  |
| 215669_at    | HLA-DRB4         | -1,688127507 | -1,541908042 | -0,14621946 |  |
| 217022_s_at  | IGH@ /// IGHA1 / | -1,688127507 | -1,541908042 | -0,14621946 |  |
| 229296_at    | LOC100506119     | -1,688127507 | -1,541908042 | -0,14621946 |  |
| 232061_at    | SDK2             | -1,688127507 | -1,541908042 | -0,14621946 |  |
| 232610_at    | PARP14           | -1,688127507 | -1,541908042 | -0,14621946 |  |
| 237340_at    | SLC26A8          | -1,688127507 | -1,541908042 | -0,14621946 |  |
| 241549_at    | -                | -1,688127507 | -1,541908042 | -0,14621946 |  |
| 206299_at    | FAM155B          | 0,841135803  | 0,987376598  | -0,14624079 |  |
| 215128_at    | -                | 0,457392764  | 0,603679647  | -0,14628688 |  |
| 238449_at    | LOC595101        | 0,457392764  | 0,603679647  | -0,14628688 |  |
| 202539_s_at  | HMGCR            | 3,734704399  | 3,880994209  | -0,14628981 |  |
| 224151_s_at  | AK3              | 0,103263601  | 0,249604176  | -0,14634057 |  |
| 232653_at    | -                | 0,103263601  | 0,249604176  | -0,14634057 |  |
| 235757_at    | -                | 0,103263601  | 0,249604176  | -0,14634057 |  |
| 236677_at    | NGB              | 0,103263601  | 0,249604176  | -0,14634057 |  |
| 201026_at    | EIF5B            | 2,392522438  | 2,538891651  | -0,14636921 |  |
| 223528_s_at  | METTL17          | 4,030853795  | 4,177252958  | -0,14639916 |  |
| 232353_s_at  | STYXL1           | 3,525045272  | 3,671470423  | -0,14642515 |  |
| 222930_s_at  | AGMAT            | 1,603688695  | 1,750261389  | -0,14657269 |  |
| 223018_at    | NOB1             | 3,58914411   | 3,735753654  | -0,14660954 |  |
| 226756_at    | CCDC71L          | 2,305800198  | 2,452428893  | -0,1466287  |  |
| 220395_at    | DNAJA4           | 1,390002893  | 1,536652708  | -0,14664981 |  |
| 203353_s_at  | MBD1             | 3,664184451  | 3,810956512  | -0,14677206 |  |
| 210222_s_at  | RTN1             | 1,951783949  | 2,098562556  | -0,14677861 |  |
| 200925_at    | COX6A1           | 6,489687984  | 6,636473394  | -0,14678541 |  |
| 231968_at    | UGGT1            | 3,137452663  | 3,284389368  | -0,1469367  |  |
| 208403_x_at  | MAX              | 2,156646206  | 2,303602088  | -0,14695588 |  |
| 226409_at    | TBC1D20          | 2,035673598  | 2,182705233  | -0,14703163 |  |
| 225067_at    | ULK3             | 2,402750389  | 2,549796788  | -0,1470464  |  |
| 201577_at    | NME1             | 6,507094807  | 6,654161394  | -0,14706659 |  |
| 228049_x_at  | LOC100507303     | 4,008926642  | 4,155999779  | -0,14707314 |  |
| 203092_at    | TIMM44           | 2,55541096   | 2,702564916  | -0,14715396 |  |
| 229647_at    | NDUFS1           | 1,283332461  | 1,43051703   | -0,14718457 |  |
| 1569294_at   | -                | 0,384950573  | 0,532164371  | -0,1472138  |  |
| 212759_s_at  | TCF7L2           | 0,384950573  | 0,532164371  | -0,1472138  |  |
| 201796_s_at  | VAR5             | 1,210676994  | 1,3579181    | -0,14724111 |  |
| 221503_s_at  | KPNA3            | 1,732533761  | 1,879785595  | -0,14725183 |  |
| 1555943_at   | PGAM5            | 2,094906514  | 2,242180416  | -0,1472739  |  |
| 221957_at    | PDK3             | 2,094906514  | 2,242180416  | -0,1472739  |  |
| 244197_x_at  | -                | 2,596981013  | 2,744302548  | -0,14732153 |  |
| 200855_at    | NCOR1            | 0,246434561  | 0,393761504  | -0,14732694 |  |
| 210708_x_at  | CASP10           | 0,246434561  | 0,393761504  | -0,14732694 |  |
| 222016_s_at  | ZNF323           | 0,246434561  | 0,393761504  | -0,14732694 |  |
| 230763_at    | SPATA17          | 0,246434561  | 0,393761504  | -0,14732694 |  |
| 234985_at    | LDLRAD3          | 4,379468341  | 4,526836257  | -0,14736792 |  |
| 242140_at    | ERVK3-1          | 4,162483976  | 4,309858816  | -0,14737484 |  |
| 202876_s_at  | PBX2             | 3,698630507  | 3,846031735  | -0,14740123 |  |
| 1562034_at   | LINC00163        | -0,496991414 | -0,34958478  | -0,14740663 |  |
| 1568743_at   | ATP10A           | -0,496991414 | -0,34958478  | -0,14740663 |  |



|              |                  |              |              |             |  |
|--------------|------------------|--------------|--------------|-------------|--|
| 221034_s_at  | TEX13B           | -0,496991414 | -0,34958478  | -0,14740663 |  |
| 230336_at    | -                | -0,496991414 | -0,34958478  | -0,14740663 |  |
| 239130_at    | MIR101-1 /// MIR | -0,496991414 | -0,34958478  | -0,14740663 |  |
| 225103_at    | MRPL38           | 2,478200152  | 2,625627364  | -0,14742721 |  |
| 206491_s_at  | NAPA             | 2,755423794  | 2,902971658  | -0,14754786 |  |
| 208238_x_at  | -                | 2,852640442  | 3,000258961  | -0,14761852 |  |
| 203055_s_at  | ARHGEF1          | 1,314003737  | 1,461646549  | -0,14764281 |  |
| 1555405_at   | UBE3C            | -2,359436556 | -2,211750327 | -0,14768623 |  |
| 1559804_at   | -                | -2,359436556 | -2,211750327 | -0,14768623 |  |
| 1560187_at   | -                | -2,359436556 | -2,211750327 | -0,14768623 |  |
| 1561091_at   | -                | -2,359436556 | -2,211750327 | -0,14768623 |  |
| 1561430_s_at | C3orf15 /// LOC1 | -2,359436556 | -2,211750327 | -0,14768623 |  |
| 1562766_at   | -                | -2,359436556 | -2,211750327 | -0,14768623 |  |
| 1562922_at   | -                | -2,359436556 | -2,211750327 | -0,14768623 |  |
| 1562970_at   | -                | -2,359436556 | -2,211750327 | -0,14768623 |  |
| 205992_s_at  | IL15             | -2,359436556 | -2,211750327 | -0,14768623 |  |
| 207651_at    | GPR171           | -2,359436556 | -2,211750327 | -0,14768623 |  |
| 208261_x_at  | IFNA10           | -2,359436556 | -2,211750327 | -0,14768623 |  |
| 211909_x_at  | PTGER3           | -2,359436556 | -2,211750327 | -0,14768623 |  |
| 215029_at    | -                | -2,359436556 | -2,211750327 | -0,14768623 |  |
| 217155_at    | -                | -2,359436556 | -2,211750327 | -0,14768623 |  |
| 221491_x_at  | HLA-DRB1 /// HL  | -2,359436556 | -2,211750327 | -0,14768623 |  |
| 226829_at    | AFAP1L2          | -2,359436556 | -2,211750327 | -0,14768623 |  |
| 232822_x_at  | LOC100506757     | -2,359436556 | -2,211750327 | -0,14768623 |  |
| 233915_at    | KIAA0825         | -2,359436556 | -2,211750327 | -0,14768623 |  |
| 238844_s_at  | NPHP1            | -2,359436556 | -2,211750327 | -0,14768623 |  |
| 239040_at    | HNRNPD           | -2,359436556 | -2,211750327 | -0,14768623 |  |
| 239365_at    | -                | -2,359436556 | -2,211750327 | -0,14768623 |  |
| 239604_at    | -                | -2,359436556 | -2,211750327 | -0,14768623 |  |
| 240178_at    | -                | -2,359436556 | -2,211750327 | -0,14768623 |  |
| 243242_at    | -                | -2,359436556 | -2,211750327 | -0,14768623 |  |
| 243290_at    | WWC1             | -2,359436556 | -2,211750327 | -0,14768623 |  |
| 243714_at    | -                | -2,359436556 | -2,211750327 | -0,14768623 |  |
| 243855_at    | -                | -2,359436556 | -2,211750327 | -0,14768623 |  |
| 211748_x_at  | PTGDS            | -0,172274514 | -0,024572586 | -0,14770193 |  |
| 230443_at    | NHP2L1           | -0,172274514 | -0,024572586 | -0,14770193 |  |
| 219120_at    | C2orf44          | 1,649074067  | 1,796776588  | -0,14770252 |  |
| 225091_at    | ZCCHC3           | 3,55745065   | 3,705189898  | -0,14773925 |  |
| 213571_s_at  | EIF4E2 /// LOC10 | 4,325653301  | 4,473427782  | -0,14777448 |  |
| 1558876_at   | -                | 1,168140757  | 1,315948728  | -0,14780797 |  |
| 228277_at    | FBXL19           | 1,168140757  | 1,315948728  | -0,14780797 |  |
| 212762_s_at  | TCF7L2           | 2,089851283  | 2,237691445  | -0,14784016 |  |
| 211066_x_at  | PCDHGA1 /// PC   | 2,410880861  | 2,558821855  | -0,14794099 |  |
| 219860_at    | LY6G5C           | 1,442503549  | 1,590454215  | -0,14795067 |  |
| 227788_at    | USP13            | 0,44160593   | 0,589657387  | -0,14805146 |  |
| 228915_at    | DACH1            | 0,44160593   | 0,589657387  | -0,14805146 |  |
| 227466_at    | FAM200B          | 2,472384965  | 2,620464265  | -0,1480793  |  |
| 202182_at    | KAT2A            | 2,604089881  | 2,752192409  | -0,14810253 |  |
| 223420_at    | DNAJC14          | 2,604089881  | 2,752192409  | -0,14810253 |  |
| 1553007_a_at | ODZ1             | -1,763254337 | -1,615132408 | -0,14812193 |  |
| 1554568_at   | DYNLRB1          | -1,763254337 | -1,615132408 | -0,14812193 |  |
| 1554648_a_at | DUOXA1           | -1,763254337 | -1,615132408 | -0,14812193 |  |
| 1555958_at   | CRTAC1           | -1,763254337 | -1,615132408 | -0,14812193 |  |
| 201286_at    | SDC1             | -1,763254337 | -1,615132408 | -0,14812193 |  |
| 202780_at    | OXCT1            | -1,763254337 | -1,615132408 | -0,14812193 |  |
| 205737_at    | KCNQ2            | -1,763254337 | -1,615132408 | -0,14812193 |  |

|              |                  |              |              |             |  |
|--------------|------------------|--------------|--------------|-------------|--|
| 206549_at    | INSL4            | -1,763254337 | -1,615132408 | -0,14812193 |  |
| 210368_at    | PCDHGA8          | -1,763254337 | -1,615132408 | -0,14812193 |  |
| 210398_x_at  | FUT6             | -1,763254337 | -1,615132408 | -0,14812193 |  |
| 214863_at    | -                | -1,763254337 | -1,615132408 | -0,14812193 |  |
| 219740_at    | VASH2            | -1,763254337 | -1,615132408 | -0,14812193 |  |
| 221977_at    | TBX2             | -1,763254337 | -1,615132408 | -0,14812193 |  |
| 224004_at    | ZNF226           | -1,763254337 | -1,615132408 | -0,14812193 |  |
| 226068_at    | SYK              | -1,763254337 | -1,615132408 | -0,14812193 |  |
| 226971_at    | CCDC136          | -1,763254337 | -1,615132408 | -0,14812193 |  |
| 228284_at    | TLE1             | -1,763254337 | -1,615132408 | -0,14812193 |  |
| 232930_at    | DOCK1            | -1,763254337 | -1,615132408 | -0,14812193 |  |
| 234502_at    | -                | -1,763254337 | -1,615132408 | -0,14812193 |  |
| 236927_at    | SVEP1            | -1,763254337 | -1,615132408 | -0,14812193 |  |
| 238261_at    | -                | -1,763254337 | -1,615132408 | -0,14812193 |  |
| 238707_at    | -                | -1,763254337 | -1,615132408 | -0,14812193 |  |
| 241117_at    | LOXHD1           | -1,763254337 | -1,615132408 | -0,14812193 |  |
| 219629_at    | FAM118A          | 0,917308734  | 1,065442793  | -0,14813406 |  |
| 223241_at    | SNX8             | 0,917308734  | 1,065442793  | -0,14813406 |  |
| 209393_s_at  | EIF4E2 /// LOC10 | 3,870604295  | 4,018839599  | -0,1482353  |  |
| 219769_at    | INCENP           | 0,30867765   | 0,456918297  | -0,14824065 |  |
| 221559_s_at  | MIS12            | 3,164152611  | 3,312408479  | -0,14825587 |  |
| 243931_at    | -                | 1,201332287  | 1,349621332  | -0,14828905 |  |
| 227536_at    | ZC3H13           | 2,573632254  | 2,721978587  | -0,14834633 |  |
| 230033_at    | DNAAF3           | 2,254767157  | 2,403170156  | -0,148403   |  |
| 202830_s_at  | SLC37A4          | 2,064305961  | 2,212749286  | -0,14844333 |  |
| 219628_at    | ZMAT3            | 1,406361373  | 1,55481039   | -0,14844902 |  |
| 228138_at    | ZNF498           | 1,339784194  | 1,488344553  | -0,14856036 |  |
| 231316_at    | -                | 1,339784194  | 1,488344553  | -0,14856036 |  |
| 1558679_at   | C20orf112        | 1,58584542   | 1,73441697   | -0,14857155 |  |
| 1554778_at   | PHLDB2           | -3,287237186 | -3,138626879 | -0,14861031 |  |
| 1558480_at   | LOC100507032     | -3,287237186 | -3,138626879 | -0,14861031 |  |
| 1558579_at   | FLJ37786         | -3,287237186 | -3,138626879 | -0,14861031 |  |
| 1558999_x_at | LOC283922 /// PI | -3,287237186 | -3,138626879 | -0,14861031 |  |
| 1559653_at   | -                | -3,287237186 | -3,138626879 | -0,14861031 |  |
| 1561177_at   | -                | -3,287237186 | -3,138626879 | -0,14861031 |  |
| 1563462_at   | -                | -3,287237186 | -3,138626879 | -0,14861031 |  |
| 1564672_at   | -                | -3,287237186 | -3,138626879 | -0,14861031 |  |
| 230962_at    | DCLK1            | -3,287237186 | -3,138626879 | -0,14861031 |  |
| 243991_at    | -                | -3,287237186 | -3,138626879 | -0,14861031 |  |
| 1555011_at   | ZFYVE16          | -2,311268652 | -2,162639771 | -0,14862888 |  |
| 1555353_at   | LRP1             | -2,311268652 | -2,162639771 | -0,14862888 |  |
| 1556394_a_at | -                | -2,311268652 | -2,162639771 | -0,14862888 |  |
| 1563015_at   | -                | -2,311268652 | -2,162639771 | -0,14862888 |  |
| 1563557_at   | -                | -2,311268652 | -2,162639771 | -0,14862888 |  |
| 1568836_at   | CLK4             | -2,311268652 | -2,162639771 | -0,14862888 |  |
| 202207_at    | ARL4C            | -2,311268652 | -2,162639771 | -0,14862888 |  |
| 205433_at    | BCHE             | -2,311268652 | -2,162639771 | -0,14862888 |  |
| 207409_at    | LECT2            | -2,311268652 | -2,162639771 | -0,14862888 |  |
| 207489_at    | RPS2P45          | -2,311268652 | -2,162639771 | -0,14862888 |  |
| 207916_at    | -                | -2,311268652 | -2,162639771 | -0,14862888 |  |
| 208449_s_at  | FGF8             | -2,311268652 | -2,162639771 | -0,14862888 |  |
| 210842_at    | NRP2             | -2,311268652 | -2,162639771 | -0,14862888 |  |
| 217283_at    | -                | -2,311268652 | -2,162639771 | -0,14862888 |  |
| 220299_at    | SPATA6           | -2,311268652 | -2,162639771 | -0,14862888 |  |
| 222106_at    | PRND             | -2,311268652 | -2,162639771 | -0,14862888 |  |
| 231356_at    | LOC100652917     | -2,311268652 | -2,162639771 | -0,14862888 |  |

|              |                 |              |              |             |  |
|--------------|-----------------|--------------|--------------|-------------|--|
| 231639_at    | LOC100506291    | -2,311268652 | -2,162639771 | -0,14862888 |  |
| 232556_at    | -               | -2,311268652 | -2,162639771 | -0,14862888 |  |
| 233260_at    | -               | -2,311268652 | -2,162639771 | -0,14862888 |  |
| 233737_s_at  | LOC284561       | -2,311268652 | -2,162639771 | -0,14862888 |  |
| 234741_at    | ATP2B2          | -2,311268652 | -2,162639771 | -0,14862888 |  |
| 235602_at    | TP53INP1        | -2,311268652 | -2,162639771 | -0,14862888 |  |
| 236864_at    | SYTL3           | -2,311268652 | -2,162639771 | -0,14862888 |  |
| 237571_at    | -               | -2,311268652 | -2,162639771 | -0,14862888 |  |
| 239037_at    | GNAS            | -2,311268652 | -2,162639771 | -0,14862888 |  |
| 240225_at    | -               | -2,311268652 | -2,162639771 | -0,14862888 |  |
| 240309_at    | -               | -2,311268652 | -2,162639771 | -0,14862888 |  |
| 240708_at    | PEX5L-AS2       | -2,311268652 | -2,162639771 | -0,14862888 |  |
| 240913_at    | FGFR2           | -2,311268652 | -2,162639771 | -0,14862888 |  |
| 241028_at    | RPGRIP1L        | -2,311268652 | -2,162639771 | -0,14862888 |  |
| 241041_at    | -               | -2,311268652 | -2,162639771 | -0,14862888 |  |
| 1552422_at   | C10orf25        | -0,79540287  | -0,646746079 | -0,14865679 |  |
| 1567624_at   | TREML5P         | -0,79540287  | -0,646746079 | -0,14865679 |  |
| 213673_x_at  | NENF            | -0,79540287  | -0,646746079 | -0,14865679 |  |
| 215057_at    | LOC100272228    | -0,79540287  | -0,646746079 | -0,14865679 |  |
| 215374_at    | PAPOLA          | -0,79540287  | -0,646746079 | -0,14865679 |  |
| 218660_at    | DYSF            | -0,79540287  | -0,646746079 | -0,14865679 |  |
| 227137_at    | C10orf46        | -0,79540287  | -0,646746079 | -0,14865679 |  |
| 232096_x_at  | FOXP1-IT1       | -0,79540287  | -0,646746079 | -0,14865679 |  |
| 239932_at    | -               | -0,79540287  | -0,646746079 | -0,14865679 |  |
| 225564_at    | SPATA13         | 0,95671774   | 1,105412836  | -0,1486951  |  |
| 238672_at    | -               | 0,95671774   | 1,105412836  | -0,1486951  |  |
| 216993_s_at  | COL11A2         | 0,555999837  | 0,704715219  | -0,14871538 |  |
| 209754_s_at  | TMPO            | 2,38635068   | 2,53523821   | -0,14888753 |  |
| 222997_s_at  | MRPS21          | 4,841283944  | 4,990179445  | -0,1488955  |  |
| 205645_at    | REPS2           | -0,089689931 | 0,059218869  | -0,1489088  |  |
| 213659_at    | ZNF75D          | -0,089689931 | 0,059218869  | -0,1489088  |  |
| 229997_at    | VANGL1          | -0,089689931 | 0,059218869  | -0,1489088  |  |
| 243639_at    | -               | -0,089689931 | 0,059218869  | -0,1489088  |  |
| 217860_at    | NDUFA10         | 4,506303097  | 4,655247494  | -0,1489444  |  |
| 1555063_at   | USP6            | -1,812418401 | -1,663414495 | -0,14900391 |  |
| 1557836_at   | ELMOD2          | -1,812418401 | -1,663414495 | -0,14900391 |  |
| 1558062_at   | FBXO10          | -1,812418401 | -1,663414495 | -0,14900391 |  |
| 1560011_at   | JRK             | -1,812418401 | -1,663414495 | -0,14900391 |  |
| 1561893_at   | -               | -1,812418401 | -1,663414495 | -0,14900391 |  |
| 1562153_a_at | MIR1204 /// PVT | -1,812418401 | -1,663414495 | -0,14900391 |  |
| 1565527_x_at | TCP11L2         | -1,812418401 | -1,663414495 | -0,14900391 |  |
| 203908_at    | SLC4A4          | -1,812418401 | -1,663414495 | -0,14900391 |  |
| 216931_at    | -               | -1,812418401 | -1,663414495 | -0,14900391 |  |
| 218980_at    | FHOD3           | -1,812418401 | -1,663414495 | -0,14900391 |  |
| 235193_at    | -               | -1,812418401 | -1,663414495 | -0,14900391 |  |
| 238895_at    | -               | -1,812418401 | -1,663414495 | -0,14900391 |  |
| 241834_at    | IPW /// LOC1005 | -1,812418401 | -1,663414495 | -0,14900391 |  |
| 244162_at    | -               | -1,812418401 | -1,663414495 | -0,14900391 |  |
| 244400_at    | VPS33A          | -1,812418401 | -1,663414495 | -0,14900391 |  |
| 203297_s_at  | JARID2          | 3,920575295  | 4,06960609   | -0,1490308  |  |
| 225636_at    | STAT2           | 3,109000457  | 3,258033502  | -0,14903305 |  |
| 222158_s_at  | DESI2           | 1,493160564  | 1,642321262  | -0,1491607  |  |
| 239923_at    | -               | 0,715481152  | 0,864649967  | -0,14916882 |  |
| 52005_at     | WIZ             | 1,984838485  | 2,134018979  | -0,14918049 |  |
| 1556058_s_at | SPEN            | -0,285837228 | -0,136643983 | -0,14919325 |  |
| 226506_at    | THSD4           | -0,285837228 | -0,136643983 | -0,14919325 |  |

|              |                  |              |              |             |  |
|--------------|------------------|--------------|--------------|-------------|--|
| 230543_at    | -                | -0,285837228 | -0,136643983 | -0,14919325 |  |
| 231254_at    | -                | -0,285837228 | -0,136643983 | -0,14919325 |  |
| 231957_s_at  | DPP9             | -0,285837228 | -0,136643983 | -0,14919325 |  |
| 236666_s_at  | LRRC10B          | -0,285837228 | -0,136643983 | -0,14919325 |  |
| 242790_at    | -                | -0,285837228 | -0,136643983 | -0,14919325 |  |
| 211202_s_at  | KDM5B            | 3,183265014  | 3,332545245  | -0,14928023 |  |
| 206861_s_at  | CGGBP1           | 2,972842302  | 3,122166354  | -0,14932405 |  |
| 229755_x_at  | DLL3             | 0,228146222  | 0,377530647  | -0,14938443 |  |
| 230973_at    | SH2D5            | 0,606430281  | 0,755840599  | -0,14941032 |  |
| 203843_at    | RPS6KA3          | 4,227797443  | 4,377221477  | -0,14942403 |  |
| 212349_at    | POFUT1           | 1,153678675  | 1,303116084  | -0,14943741 |  |
| 224610_at    | SNHG1 /// SNOR   | 5,117309148  | 5,266783942  | -0,14947479 |  |
| 202183_s_at  | KIF22            | 2,905386372  | 3,05486507   | -0,1494787  |  |
| 224845_s_at  | SLAIN2           | 2,314494121  | 2,464004877  | -0,14951076 |  |
| 203450_at    | CBY1             | 1,331241794  | 1,480766833  | -0,14952504 |  |
| 207983_s_at  | STAG2            | 1,331241794  | 1,480766833  | -0,14952504 |  |
| 1555933_at   | KIAA2013         | 0,810733188  | 0,960386719  | -0,14965353 |  |
| 241918_at    | ANO7             | 0,810733188  | 0,960386719  | -0,14965353 |  |
| 204992_s_at  | PFN2             | 1,261018186  | 1,410714371  | -0,14969619 |  |
| 220788_s_at  | IRF9 /// RNF31   | 1,261018186  | 1,410714371  | -0,14969619 |  |
| 223912_s_at  | CLN8             | 2,671625168  | 2,821324225  | -0,14969906 |  |
| 1562869_at   | -                | 0,072842263  | 0,222599095  | -0,14975683 |  |
| 204029_at    | CELSR2           | 0,072842263  | 0,222599095  | -0,14975683 |  |
| 207979_s_at  | CD8B             | 0,072842263  | 0,222599095  | -0,14975683 |  |
| 241154_x_at  | -                | 0,072842263  | 0,222599095  | -0,14975683 |  |
| 241876_at    | -                | 0,072842263  | 0,222599095  | -0,14975683 |  |
| 1552867_at   | -                | -2,236765673 | -2,086984744 | -0,14978093 |  |
| 1553132_a_at | TC2N             | -2,236765673 | -2,086984744 | -0,14978093 |  |
| 1558477_at   | LOC100131496     | -2,236765673 | -2,086984744 | -0,14978093 |  |
| 1559923_at   | -                | -2,236765673 | -2,086984744 | -0,14978093 |  |
| 1560610_at   | -                | -2,236765673 | -2,086984744 | -0,14978093 |  |
| 1569624_at   | -                | -2,236765673 | -2,086984744 | -0,14978093 |  |
| 205033_s_at  | DEFA1 /// DEFA1  | -2,236765673 | -2,086984744 | -0,14978093 |  |
| 214956_at    | AAK1             | -2,236765673 | -2,086984744 | -0,14978093 |  |
| 217288_at    | -                | -2,236765673 | -2,086984744 | -0,14978093 |  |
| 220485_s_at  | SIRPG            | -2,236765673 | -2,086984744 | -0,14978093 |  |
| 221322_at    | NPVF             | -2,236765673 | -2,086984744 | -0,14978093 |  |
| 221396_at    | TAS2R7           | -2,236765673 | -2,086984744 | -0,14978093 |  |
| 224404_s_at  | FCRL5            | -2,236765673 | -2,086984744 | -0,14978093 |  |
| 228546_at    | DPP6             | -2,236765673 | -2,086984744 | -0,14978093 |  |
| 231937_at    | -                | -2,236765673 | -2,086984744 | -0,14978093 |  |
| 233289_at    | -                | -2,236765673 | -2,086984744 | -0,14978093 |  |
| 234314_at    | RALGAPA2         | -2,236765673 | -2,086984744 | -0,14978093 |  |
| 234514_at    | SRMS             | -2,236765673 | -2,086984744 | -0,14978093 |  |
| 237692_at    | -                | -2,236765673 | -2,086984744 | -0,14978093 |  |
| 240327_at    | -                | -2,236765673 | -2,086984744 | -0,14978093 |  |
| 240431_at    | -                | -2,236765673 | -2,086984744 | -0,14978093 |  |
| 241253_at    | -                | -2,236765673 | -2,086984744 | -0,14978093 |  |
| 243059_at    | FOXF1-AS1        | -2,236765673 | -2,086984744 | -0,14978093 |  |
| 243502_at    | GJC1             | -2,236765673 | -2,086984744 | -0,14978093 |  |
| 243716_at    | FLJ43663         | -2,236765673 | -2,086984744 | -0,14978093 |  |
| 238402_s_at  | ENDOV /// LOC1   | 1,394109935  | 1,543943227  | -0,14983329 |  |
| 203707_at    | FLJ39639 /// ZNF | 3,327680494  | 3,477609204  | -0,14992871 |  |
| 203008_x_at  | TXNDC9           | 3,843828743  | 3,993768971  | -0,14994023 |  |
| 218982_s_at  | MRPS17           | 4,055697197  | 4,205686812  | -0,14998962 |  |
| 224889_at    | FOXO3            | 2,009141686  | 2,159161028  | -0,15001934 |  |

|              |              |              |              |             |  |
|--------------|--------------|--------------|--------------|-------------|--|
| 210052_s_at  | TPX2         | 4,435837257  | 4,585862883  | -0,15002563 |  |
| 201147_s_at  | TIMP3        | 4,162483976  | 4,312529215  | -0,15004524 |  |
| 226838_at    | TTC32        | 1,758252436  | 1,908311039  | -0,1500586  |  |
| 222635_s_at  | MED28        | 2,185368281  | 2,335461563  | -0,15009328 |  |
| 225926_at    | VTI1B        | 1,965648824  | 2,115788273  | -0,15013945 |  |
| 230333_at    | -            | 2,342392905  | 2,492544876  | -0,15015197 |  |
| 1558573_at   | MCTS1        | -1,888254346 | -1,738067356 | -0,15018699 |  |
| 1570653_at   | -            | -1,888254346 | -1,738067356 | -0,15018699 |  |
| 209169_at    | GPM6B        | -1,888254346 | -1,738067356 | -0,15018699 |  |
| 211887_x_at  | MSR1         | -1,888254346 | -1,738067356 | -0,15018699 |  |
| 227995_at    | -            | -1,888254346 | -1,738067356 | -0,15018699 |  |
| 234269_at    | -            | -1,888254346 | -1,738067356 | -0,15018699 |  |
| 237429_at    | -            | -1,888254346 | -1,738067356 | -0,15018699 |  |
| 238296_at    | GLIPR1L1     | -1,888254346 | -1,738067356 | -0,15018699 |  |
| 242518_at    | LOC100505648 | -1,888254346 | -1,738067356 | -0,15018699 |  |
| 242581_at    | MAP3K15      | -1,888254346 | -1,738067356 | -0,15018699 |  |
| 242927_at    | DCLRE1C      | -1,888254346 | -1,738067356 | -0,15018699 |  |
| 244342_at    | PATL1        | -1,888254346 | -1,738067356 | -0,15018699 |  |
| 212130_x_at  | EIF1         | 5,708801593  | 5,859000826  | -0,15019923 |  |
| 228566_at    | RPRD1A       | 1,829737795  | 1,979940779  | -0,15020298 |  |
| 1555953_at   | SLC19A1      | 1,422536444  | 1,572742379  | -0,15020593 |  |
| 201143_s_at  | EIF2S1       | 3,920575295  | 4,070868415  | -0,15029312 |  |
| 212478_at    | RMND5A       | 1,027166904  | 1,177496821  | -0,15032992 |  |
| 1552998_at   | DEFB125      | -2,187914861 | -2,037551727 | -0,15036313 |  |
| 1555123_at   | ST6GAL2      | -2,187914861 | -2,037551727 | -0,15036313 |  |
| 1557740_a_at | -            | -2,187914861 | -2,037551727 | -0,15036313 |  |
| 1561276_at   | DOCK5        | -2,187914861 | -2,037551727 | -0,15036313 |  |
| 1561678_at   | -            | -2,187914861 | -2,037551727 | -0,15036313 |  |
| 1564744_at   | -            | -2,187914861 | -2,037551727 | -0,15036313 |  |
| 1567997_x_at | -            | -2,187914861 | -2,037551727 | -0,15036313 |  |
| 1569802_at   | -            | -2,187914861 | -2,037551727 | -0,15036313 |  |
| 1570430_at   | -            | -2,187914861 | -2,037551727 | -0,15036313 |  |
| 203961_at    | NEBL         | -2,187914861 | -2,037551727 | -0,15036313 |  |
| 208394_x_at  | ESM1         | -2,187914861 | -2,037551727 | -0,15036313 |  |
| 210726_at    | CYP3A4       | -2,187914861 | -2,037551727 | -0,15036313 |  |
| 211226_at    | GALR2        | -2,187914861 | -2,037551727 | -0,15036313 |  |
| 214318_s_at  | FRY          | -2,187914861 | -2,037551727 | -0,15036313 |  |
| 215782_at    | RAB40AL      | -2,187914861 | -2,037551727 | -0,15036313 |  |
| 217050_at    | EPAG         | -2,187914861 | -2,037551727 | -0,15036313 |  |
| 221043_at    | -            | -2,187914861 | -2,037551727 | -0,15036313 |  |
| 231304_at    | PPP3R2       | -2,187914861 | -2,037551727 | -0,15036313 |  |
| 231794_at    | CTLA4        | -2,187914861 | -2,037551727 | -0,15036313 |  |
| 233923_at    | ARHGAP42     | -2,187914861 | -2,037551727 | -0,15036313 |  |
| 234567_at    | -            | -2,187914861 | -2,037551727 | -0,15036313 |  |
| 236996_at    | -            | -2,187914861 | -2,037551727 | -0,15036313 |  |
| 238309_x_at  | -            | -2,187914861 | -2,037551727 | -0,15036313 |  |
| 241127_at    | -            | -2,187914861 | -2,037551727 | -0,15036313 |  |
| 242579_at    | BMPR1B       | -2,187914861 | -2,037551727 | -0,15036313 |  |
| 244815_at    | -            | -2,187914861 | -2,037551727 | -0,15036313 |  |
| 1557832_at   | -            | -2,930741289 | -2,780313924 | -0,15042736 |  |
| 1558869_at   | -            | -2,930741289 | -2,780313924 | -0,15042736 |  |
| 1559404_a_at | LOC100288198 | -2,930741289 | -2,780313924 | -0,15042736 |  |
| 1560861_at   | -            | -2,930741289 | -2,780313924 | -0,15042736 |  |
| 1561593_at   | -            | -2,930741289 | -2,780313924 | -0,15042736 |  |
| 1561911_at   | -            | -2,930741289 | -2,780313924 | -0,15042736 |  |
| 1564796_at   | EMP1         | -2,930741289 | -2,780313924 | -0,15042736 |  |

|              |              |              |              |             |  |
|--------------|--------------|--------------|--------------|-------------|--|
| 1570359_at   | DDX3Y        | -2,930741289 | -2,780313924 | -0,15042736 |  |
| 214397_at    | MBD2         | -2,930741289 | -2,780313924 | -0,15042736 |  |
| 229376_at    | PROX1        | -2,930741289 | -2,780313924 | -0,15042736 |  |
| 230291_s_at  | NFIB         | -2,930741289 | -2,780313924 | -0,15042736 |  |
| 231487_at    | COX8C        | -2,930741289 | -2,780313924 | -0,15042736 |  |
| 234656_x_at  | -            | -2,930741289 | -2,780313924 | -0,15042736 |  |
| 237123_x_at  | KLHL9        | -2,930741289 | -2,780313924 | -0,15042736 |  |
| 237808_at    | ST7-AS2      | -2,930741289 | -2,780313924 | -0,15042736 |  |
| 238605_at    | NOL4         | -2,930741289 | -2,780313924 | -0,15042736 |  |
| 239579_at    | EPHX4        | -2,930741289 | -2,780313924 | -0,15042736 |  |
| 241765_at    | CPM          | -2,930741289 | -2,780313924 | -0,15042736 |  |
| 243713_at    | -            | -2,930741289 | -2,780313924 | -0,15042736 |  |
| 1554404_a_at | -            | -0,196756757 | -0,046302147 | -0,15045461 |  |
| 231652_at    | -            | -0,196756757 | -0,046302147 | -0,15045461 |  |
| 210734_x_at  | MAX          | 2,72965419   | 2,880111483  | -0,15045729 |  |
| 217142_at    | -            | 1,143956113  | 1,294497133  | -0,15054102 |  |
| 1555213_a_at | CLEC7A       | -1,937711681 | -1,787089803 | -0,15062188 |  |
| 1556874_a_at | MEX3C        | -1,937711681 | -1,787089803 | -0,15062188 |  |
| 1559910_at   | -            | -1,937711681 | -1,787089803 | -0,15062188 |  |
| 1561101_at   | JAKMIP2-AS1  | -1,937711681 | -1,787089803 | -0,15062188 |  |
| 1569289_at   | BIVM         | -1,937711681 | -1,787089803 | -0,15062188 |  |
| 1570529_at   | KIAA0020     | -1,937711681 | -1,787089803 | -0,15062188 |  |
| 205286_at    | TFAP2C       | -1,937711681 | -1,787089803 | -0,15062188 |  |
| 205800_at    | -            | -1,937711681 | -1,787089803 | -0,15062188 |  |
| 206980_s_at  | FLT3LG       | -1,937711681 | -1,787089803 | -0,15062188 |  |
| 207021_at    | ZBPB         | -1,937711681 | -1,787089803 | -0,15062188 |  |
| 207115_x_at  | MBTD1        | -1,937711681 | -1,787089803 | -0,15062188 |  |
| 207374_at    | PLSCR2       | -1,937711681 | -1,787089803 | -0,15062188 |  |
| 210261_at    | KCNK2        | -1,937711681 | -1,787089803 | -0,15062188 |  |
| 221408_x_at  | PCDHB12      | -1,937711681 | -1,787089803 | -0,15062188 |  |
| 226438_at    | SNTB1        | -1,937711681 | -1,787089803 | -0,15062188 |  |
| 232452_at    | LOC148824    | -1,937711681 | -1,787089803 | -0,15062188 |  |
| 234346_x_at  | -            | -1,937711681 | -1,787089803 | -0,15062188 |  |
| 231863_at    | ING3         | 1,894952274  | 2,045615873  | -0,1506636  |  |
| 235063_at    | C20orf196    | 0,417596971  | 0,568365095  | -0,15076812 |  |
| 225881_at    | SLC35B4      | 3,989378303  | 4,140152555  | -0,15077425 |  |
| 225464_at    | FRMD6        | 1,063722698  | 1,214517879  | -0,15079518 |  |
| 222562_s_at  | TNKS2        | 2,206540699  | 2,357351836  | -0,15081114 |  |
| 225046_at    | LOC389831    | 2,675004741  | 2,825817328  | -0,15081259 |  |
| 214733_s_at  | YIPF1        | 2,726400382  | 2,877228323  | -0,15082794 |  |
| 224309_s_at  | SUGT1        | 4,683703925  | 4,834642428  | -0,1509385  |  |
| 226993_at    | -            | 2,846658948  | 2,997606395  | -0,15094745 |  |
| 206380_s_at  | CFP          | 1,799091453  | 1,950068772  | -0,15097732 |  |
| 223192_at    | SLC25A28     | 1,799091453  | 1,950068772  | -0,15097732 |  |
| 201027_s_at  | EIF5B        | 4,326728025  | 4,477716877  | -0,15098885 |  |
| 203806_s_at  | FANCA        | 1,318332599  | 1,469325098  | -0,1509925  |  |
| 236855_at    | C10orf85     | 0,798390451  | 0,949447784  | -0,15105733 |  |
| 1554436_a_at | REG4         | -2,063149277 | -1,912089812 | -0,15105947 |  |
| 1555169_at   | LIG3         | -2,063149277 | -1,912089812 | -0,15105947 |  |
| 1555703_at   | ST3GAL3      | -2,063149277 | -1,912089812 | -0,15105947 |  |
| 1556019_at   | GPR180       | -2,063149277 | -1,912089812 | -0,15105947 |  |
| 1557865_at   | LOC100505658 | -2,063149277 | -1,912089812 | -0,15105947 |  |
| 1558844_at   | LOC100506127 | -2,063149277 | -1,912089812 | -0,15105947 |  |
| 1568931_at   | -            | -2,063149277 | -1,912089812 | -0,15105947 |  |
| 1570134_at   | -            | -2,063149277 | -1,912089812 | -0,15105947 |  |
| 205044_at    | GABRP        | -2,063149277 | -1,912089812 | -0,15105947 |  |

|             |                  |              |              |             |  |
|-------------|------------------|--------------|--------------|-------------|--|
| 207257_at   | EPO              | -2,063149277 | -1,912089812 | -0,15105947 |  |
| 210615_at   | NRP1             | -2,063149277 | -1,912089812 | -0,15105947 |  |
| 211840_s_at | PDE4D            | -2,063149277 | -1,912089812 | -0,15105947 |  |
| 216598_s_at | CCL2             | -2,063149277 | -1,912089812 | -0,15105947 |  |
| 219832_s_at | HOXC13           | -2,063149277 | -1,912089812 | -0,15105947 |  |
| 222885_at   | EMCN             | -2,063149277 | -1,912089812 | -0,15105947 |  |
| 224538_s_at | PAR6G            | -2,063149277 | -1,912089812 | -0,15105947 |  |
| 229088_at   | ENPP1            | -2,063149277 | -1,912089812 | -0,15105947 |  |
| 229627_at   | C9orf174 /// LOC | -2,063149277 | -1,912089812 | -0,15105947 |  |
| 230628_at   | EP400            | -2,063149277 | -1,912089812 | -0,15105947 |  |
| 234932_s_at | CDCP1            | -2,063149277 | -1,912089812 | -0,15105947 |  |
| 235506_at   | -                | -2,063149277 | -1,912089812 | -0,15105947 |  |
| 236255_at   | PLEKHG4B         | -2,063149277 | -1,912089812 | -0,15105947 |  |
| 237132_at   | TJP2             | -2,063149277 | -1,912089812 | -0,15105947 |  |
| 242406_at   | -                | -2,063149277 | -1,912089812 | -0,15105947 |  |
| 243206_at   | -                | -2,063149277 | -1,912089812 | -0,15105947 |  |
| 1561378_at  | C12orf42         | -2,01371626  | -1,862647763 | -0,1510685  |  |
| 1562965_at  | -                | -2,01371626  | -1,862647763 | -0,1510685  |  |
| 1563252_at  | ERBB3            | -2,01371626  | -1,862647763 | -0,1510685  |  |
| 1563488_at  | TMEM132B         | -2,01371626  | -1,862647763 | -0,1510685  |  |
| 1570227_at  | -                | -2,01371626  | -1,862647763 | -0,1510685  |  |
| 206155_at   | ABCC2            | -2,01371626  | -1,862647763 | -0,1510685  |  |
| 208471_at   | HPR              | -2,01371626  | -1,862647763 | -0,1510685  |  |
| 216534_at   | -                | -2,01371626  | -1,862647763 | -0,1510685  |  |
| 226205_at   | ANKRD13D         | -2,01371626  | -1,862647763 | -0,1510685  |  |
| 232304_at   | PELI1            | -2,01371626  | -1,862647763 | -0,1510685  |  |
| 232848_at   | MIR4500HG        | -2,01371626  | -1,862647763 | -0,1510685  |  |
| 235732_at   | ZNF704           | -2,01371626  | -1,862647763 | -0,1510685  |  |
| 236669_at   | LOC100507495     | -2,01371626  | -1,862647763 | -0,1510685  |  |
| 240640_at   | -                | -2,01371626  | -1,862647763 | -0,1510685  |  |
| 242106_at   | -                | -2,01371626  | -1,862647763 | -0,1510685  |  |
| 242547_at   | -                | -2,01371626  | -1,862647763 | -0,1510685  |  |
| 208693_s_at | GARS             | 5,449277747  | 5,600408483  | -0,15113074 |  |
| 1552674_at  | DIRC1            | -3,250025915 | -3,098858316 | -0,1511676  |  |
| 1561854_at  | -                | -3,250025915 | -3,098858316 | -0,1511676  |  |
| 1561997_at  | -                | -3,250025915 | -3,098858316 | -0,1511676  |  |
| 231647_s_at | FCRL5            | -3,250025915 | -3,098858316 | -0,1511676  |  |
| 239712_at   | CCDC171          | -3,250025915 | -3,098858316 | -0,1511676  |  |
| 241235_at   | -                | -3,250025915 | -3,098858316 | -0,1511676  |  |
| 244083_at   | -                | -3,250025915 | -3,098858316 | -0,1511676  |  |
| 218955_at   | BRF2             | 3,050355245  | 3,201528602  | -0,15117336 |  |
| 205613_at   | SYT17            | -0,022466681 | 0,128747141  | -0,15121382 |  |
| 219943_s_at | USP46            | -0,022466681 | 0,128747141  | -0,15121382 |  |
| 223070_at   | SELK             | 4,452179507  | 4,603415342  | -0,15123584 |  |
| 207439_s_at | SLC35A2          | 1,722769813  | 1,874012195  | -0,15124238 |  |
| 204608_at   | ASL              | 1,820612054  | 1,971855016  | -0,15124296 |  |
| 219649_at   | ALG6             | 2,901063789  | 3,052311115  | -0,15124733 |  |
| 35148_at    | TJP3             | -1,762490013 | -1,611241088 | -0,15124893 |  |
| 201173_x_at | NUDC             | 5,262252783  | 5,413551407  | -0,15129862 |  |
| 202339_at   | SYMPK            | 0,888485433  | 1,039887232  | -0,1514018  |  |
| 217735_s_at | EIF2AK1          | 0,888485433  | 1,039887232  | -0,1514018  |  |
| 226035_at   | USP31            | 1,932146506  | 2,083632167  | -0,15148566 |  |
| 221888_at   | CC2D1A           | 1,841816345  | 1,993317152  | -0,15150081 |  |
| 212250_at   | MTDH             | 4,375319345  | 4,526836257  | -0,15151691 |  |
| 213165_at   | CEP350           | 2,864529541  | 3,016072743  | -0,1515432  |  |
| 218486_at   | KLF11            | 1,614289682  | 1,765933685  | -0,151644   |  |

|              |                 |              |              |             |  |
|--------------|-----------------|--------------|--------------|-------------|--|
| 220610_s_at  | LRRFIP2         | 1,614289682  | 1,765933685  | -0,151644   |  |
| 225224_at    | C20orf112       | 3,171349466  | 3,323041804  | -0,15169234 |  |
| 219390_at    | FKBP14          | 2,225103271  | 2,376875125  | -0,15177185 |  |
| 226909_at    | ZNF518B         | 2,666540916  | 2,81832103   | -0,15178011 |  |
| 1554433_a_at | ZNF146          | 4,87068766   | 5,022506227  | -0,15181857 |  |
| 228326_at    | WDR27           | 1,556829052  | 1,708698295  | -0,15186924 |  |
| 224524_s_at  | ASB3 /// GPR75- | 2,438982012  | 2,590852465  | -0,15187045 |  |
| 231921_at    | DCAF17          | 1,638726528  | 1,790660532  | -0,151934   |  |
| 214426_x_at  | CHAF1A          | 3,092667038  | 3,244672787  | -0,15200575 |  |
| 41397_at     | ZNF821          | -0,072578787 | 0,079429697  | -0,15200848 |  |
| 214613_at    | GPR3            | 0,052199481  | 0,204310755  | -0,15211127 |  |
| 215137_at    | -               | 0,052199481  | 0,204310755  | -0,15211127 |  |
| 229252_at    | ATG9B           | 0,052199481  | 0,204310755  | -0,15211127 |  |
| 237444_at    | -               | 0,052199481  | 0,204310755  | -0,15211127 |  |
| 1553976_a_at | DPCD            | 4,265835914  | 4,417965868  | -0,15212995 |  |
| 216511_s_at  | TCF7L2          | 1,764611101  | 1,916759838  | -0,15214874 |  |
| 1554680_s_at | KCNS2           | -0,83191556  | -0,679763839 | -0,15215172 |  |
| 208437_at    | CLCN1           | -0,83191556  | -0,679763839 | -0,15215172 |  |
| 224409_s_at  | TSSK6           | -0,83191556  | -0,679763839 | -0,15215172 |  |
| 227483_s_at  | UNC93B1         | -0,83191556  | -0,679763839 | -0,15215172 |  |
| 231068_at    | SLC47A2         | -0,83191556  | -0,679763839 | -0,15215172 |  |
| 235607_at    | -               | -0,83191556  | -0,679763839 | -0,15215172 |  |
| 218696_at    | EIF2AK3         | 2,776027875  | 2,928263672  | -0,1522358  |  |
| 212171_x_at  | VEGFA           | 2,030406107  | 2,182705233  | -0,15229913 |  |
| 213093_at    | PRKCA           | 4,735200764  | 4,88753743   | -0,15233667 |  |
| 210951_x_at  | RAB27A          | 3,566577193  | 3,718943256  | -0,15236606 |  |
| 201876_at    | PON2            | 3,686960673  | 3,839380885  | -0,15242021 |  |
| 1556987_s_at | OR2H1           | -0,543051993 | -0,39061235  | -0,15243964 |  |
| 1562557_at   | -               | -0,543051993 | -0,39061235  | -0,15243964 |  |
| 213834_at    | IQSEC3 /// LOC1 | -0,543051993 | -0,39061235  | -0,15243964 |  |
| 215476_at    | -               | -0,543051993 | -0,39061235  | -0,15243964 |  |
| 228081_at    | CCNG2           | -0,543051993 | -0,39061235  | -0,15243964 |  |
| 235825_at    | -               | -0,543051993 | -0,39061235  | -0,15243964 |  |
| 235833_at    | PPAT            | -0,543051993 | -0,39061235  | -0,15243964 |  |
| 212871_at    | MAPKAPK5        | 2,127340679  | 2,27978304   | -0,15244236 |  |
| 226458_at    | -               | 2,048758794  | 2,201267805  | -0,15250901 |  |
| 218315_s_at  | CDK5RAP1        | 3,80348216   | 3,956010056  | -0,1525279  |  |
| 225572_at    | CREB1           | 2,107467633  | 2,259997914  | -0,15253028 |  |
| 212789_at    | NCAPD3          | 3,500492568  | 3,653046807  | -0,15255424 |  |
| 201235_s_at  | BTG2            | 0,20027154   | 0,352836757  | -0,15256522 |  |
| 203131_at    | PDGFRA          | 0,20027154   | 0,352836757  | -0,15256522 |  |
| 228308_at    | FKBP11          | 0,20027154   | 0,352836757  | -0,15256522 |  |
| 230995_at    | CMBL            | 0,20027154   | 0,352836757  | -0,15256522 |  |
| 232552_at    | DAAM1           | 0,20027154   | 0,352836757  | -0,15256522 |  |
| 219332_at    | MICALL2         | 1,659347917  | 1,811954245  | -0,15260633 |  |
| 237180_at    | -               | 1,163336153  | 1,315948728  | -0,15261257 |  |
| 229063_s_at  | CCDC107         | 0,401366113  | 0,553993624  | -0,15262751 |  |
| 224796_at    | ASAP1           | 4,688310136  | 4,840945211  | -0,15263507 |  |
| 221800_s_at  | C17orf70        | 1,462198073  | 1,614891062  | -0,15269299 |  |
| 220757_s_at  | UBXN6           | 1,549482847  | 1,702196344  | -0,1527135  |  |
| 229434_at    | -               | 2,446911392  | 2,599625088  | -0,1527137  |  |
| 215537_x_at  | DDAH2           | 3,105247586  | 3,258033502  | -0,15278592 |  |
| 1555814_a_at | RHOA            | 5,775355733  | 5,928191214  | -0,15283548 |  |
| 215596_s_at  | LTN1            | 4,065387235  | 4,21827299   | -0,15288576 |  |
| 204874_x_at  | BAIAP3          | 0,682279745  | 0,835239052  | -0,15295931 |  |
| 221760_at    | MAN1A1          | 3,373122675  | 3,526272152  | -0,15314948 |  |



|              |              |              |              |             |  |
|--------------|--------------|--------------|--------------|-------------|--|
| 201176_s_at  | ARCN1        | 4,336364681  | 4,489564557  | -0,15319988 |  |
| 218714_at    | PRR14        | 0,779676066  | 0,932882274  | -0,15320621 |  |
| 219145_at    | LPHN1        | 0,779676066  | 0,932882274  | -0,15320621 |  |
| 211743_s_at  | PRG2         | 4,111014386  | 4,264240901  | -0,15322651 |  |
| 204108_at    | NFYA         | 3,954344268  | 4,107618653  | -0,15327438 |  |
| 1554662_at   | C17orf47     | -1,308181863 | -1,154897679 | -0,15328418 |  |
| 1554876_a_at | S100Z        | -1,308181863 | -1,154897679 | -0,15328418 |  |
| 1560942_at   | PGD          | -1,308181863 | -1,154897679 | -0,15328418 |  |
| 1561029_at   | -            | -1,308181863 | -1,154897679 | -0,15328418 |  |
| 1561756_at   | -            | -1,308181863 | -1,154897679 | -0,15328418 |  |
| 1562006_at   | -            | -1,308181863 | -1,154897679 | -0,15328418 |  |
| 205900_at    | KRT1         | -1,308181863 | -1,154897679 | -0,15328418 |  |
| 206228_at    | PAX2         | -1,308181863 | -1,154897679 | -0,15328418 |  |
| 213249_at    | FBXL7        | -1,308181863 | -1,154897679 | -0,15328418 |  |
| 220702_at    | TLK1         | -1,308181863 | -1,154897679 | -0,15328418 |  |
| 227694_at    | C1orf201     | -1,308181863 | -1,154897679 | -0,15328418 |  |
| 231264_at    | TMCO2        | -1,308181863 | -1,154897679 | -0,15328418 |  |
| 234179_at    | -            | -1,308181863 | -1,154897679 | -0,15328418 |  |
| 235073_at    | SCAMP4       | -1,308181863 | -1,154897679 | -0,15328418 |  |
| 238013_at    | PLEKHA2      | -1,308181863 | -1,154897679 | -0,15328418 |  |
| 242034_at    | FBXL17       | -1,308181863 | -1,154897679 | -0,15328418 |  |
| 242757_at    | MDGA1        | -1,308181863 | -1,154897679 | -0,15328418 |  |
| 215553_x_at  | -            | 1,426552034  | 1,579853228  | -0,15330119 |  |
| 221912_s_at  | CCDC28B      | 1,426552034  | 1,579853228  | -0,15330119 |  |
| 224603_at    | LOC100507246 | 5,112331944  | 5,26568197   | -0,15335003 |  |
| 217795_s_at  | TMEM43       | 2,882181479  | 3,035599287  | -0,15341781 |  |
| 218617_at    | TRIT1        | 3,584658878  | 3,738139229  | -0,15348035 |  |
| 224439_x_at  | RNF7         | 4,254020964  | 4,407512498  | -0,15349153 |  |
| 226450_at    | INSR         | 1,296557217  | 1,450051551  | -0,15349433 |  |
| 209374_s_at  | IGHM         | 0,57058931   | 0,724100169  | -0,15351086 |  |
| 219033_at    | PARP8        | 0,57058931   | 0,724100169  | -0,15351086 |  |
| 233559_s_at  | WDFY1        | 0,57058931   | 0,724100169  | -0,15351086 |  |
| 2028_s_at    | E2F1         | 1,454352496  | 1,60795124   | -0,15359874 |  |
| 224702_at    | TMEM167A     | 5,274000783  | 5,427660949  | -0,15366017 |  |
| 209091_s_at  | SH3GLB1      | 4,527022536  | 4,68068829   | -0,15366575 |  |
| 223875_s_at  | EPC1         | 0,822971223  | 0,976641161  | -0,15366994 |  |
| 200903_s_at  | AHCY         | 5,217470448  | 5,371144162  | -0,15367371 |  |
| 210530_s_at  | NR2C1        | 1,596577845  | 1,750261389  | -0,15368354 |  |
| 221865_at    | C9orf91      | 1,596577845  | 1,750261389  | -0,15368354 |  |
| 201748_s_at  | SAFB         | 3,399920684  | 3,553617909  | -0,15369723 |  |
| 201315_x_at  | IFITM2       | 6,439155183  | 6,592874233  | -0,15371905 |  |
| 76897_s_at   | FKBP15       | -0,689817858 | -0,536087151 | -0,15373071 |  |
| 218287_s_at  | EIF2C1       | 2,37600538   | 2,529740643  | -0,15373526 |  |
| 220240_s_at  | TMCO3        | 1,037706275  | 1,191491281  | -0,15378501 |  |
| 203207_s_at  | MTFR1        | 3,310399576  | 3,464222256  | -0,15382268 |  |
| 202993_at    | ILVBL        | 2,017152618  | 2,170981159  | -0,15382854 |  |
| 221794_at    | DOCK6        | 2,310153708  | 2,464004877  | -0,15385117 |  |
| 202909_at    | EPM2AIP1     | 3,809644985  | 3,963505394  | -0,15386041 |  |
| 218441_s_at  | RPAP1        | 1,224581536  | 1,378453643  | -0,15387211 |  |
| 203099_s_at  | CDYL         | 2,390468117  | 2,544354523  | -0,15388641 |  |
| 225108_at    | AGPS         | 2,911129742  | 3,065035915  | -0,15390617 |  |
| 234974_at    | GALM         | 2,094906514  | 2,248887791  | -0,15398128 |  |
| 235240_at    | ATXN3        | 1,865674241  | 2,019703483  | -0,15402924 |  |
| 226037_s_at  | TAF9B        | 1,973904239  | 2,127967638  | -0,1540634  |  |
| 1559050_at   | HCG27        | -0,43775896  | -0,283667828 | -0,15409113 |  |
| 1562067_at   | -            | -0,43775896  | -0,283667828 | -0,15409113 |  |

|              |                 |              |              |             |  |
|--------------|-----------------|--------------|--------------|-------------|--|
| 209959_at    | NR4A3           | -0,43775896  | -0,283667828 | -0,15409113 |  |
| 223659_at    | TMPRSS13        | -0,43775896  | -0,283667828 | -0,15409113 |  |
| 228319_at    | -               | -0,43775896  | -0,283667828 | -0,15409113 |  |
| 237506_at    | TMEM177         | -0,43775896  | -0,283667828 | -0,15409113 |  |
| 242223_at    | -               | -0,43775896  | -0,283667828 | -0,15409113 |  |
| 242889_x_at  | LOC645431       | -0,43775896  | -0,283667828 | -0,15409113 |  |
| 217414_x_at  | HBA1 /// HBA2   | 5,074445308  | 5,228553706  | -0,1541084  |  |
| 210312_s_at  | IFT20           | 3,149650293  | 3,303845028  | -0,15419473 |  |
| 235529_x_at  | SAMHD1          | 3,500492568  | 3,654731437  | -0,15423887 |  |
| 201856_s_at  | ZFR             | 2,708372067  | 2,862725455  | -0,15435339 |  |
| 219217_at    | NARS2           | 3,401961598  | 3,556324192  | -0,15436259 |  |
| 226135_at    | UHRF1BP1        | 3,62365843   | 3,778101865  | -0,15444343 |  |
| 224312_x_at  | CPSF3L          | 2,109966786  | 2,264418116  | -0,15445133 |  |
| 223104_at    | JAGN1           | 3,959896375  | 4,114368048  | -0,15447167 |  |
| 224948_at    | MRPS24 /// URG  | 4,889720013  | 5,044197531  | -0,15447752 |  |
| 200699_at    | KDEL2           | 2,849652795  | 3,004228687  | -0,15457589 |  |
| 210024_s_at  | UBE2E3          | 4,687473737  | 4,842054614  | -0,15458088 |  |
| 202957_at    | HCLS1           | 3,724955181  | 3,879554231  | -0,15459905 |  |
| 212045_at    | GLG1            | 1,352503698  | 1,507116528  | -0,15461283 |  |
| 204863_s_at  | IL6ST           | 0,767063567  | 0,921731975  | -0,15466841 |  |
| 234294_x_at  | GATAD2A         | 4,539590968  | 4,694266604  | -0,15467564 |  |
| 55705_at     | R3HDM4          | 3,884902869  | 4,039618961  | -0,15471609 |  |
| 228571_at    | LOC389458 /// R | 3,12638592   | 3,281121096  | -0,15473518 |  |
| 203072_at    | MYO1E           | 0,181384709  | 0,336136178  | -0,15475147 |  |
| 212659_s_at  | IL1RN           | 0,181384709  | 0,336136178  | -0,15475147 |  |
| 227170_at    | ZNF316          | 0,181384709  | 0,336136178  | -0,15475147 |  |
| 1559960_x_at | SYCE1L          | -0,234278768 | -0,079522948 | -0,15475582 |  |
| 206973_at    | PPFIA2          | -0,234278768 | -0,079522948 | -0,15475582 |  |
| 223814_at    | TRNT1           | -0,234278768 | -0,079522948 | -0,15475582 |  |
| 227028_s_at  | DGCR2           | -0,234278768 | -0,079522948 | -0,15475582 |  |
| 232203_at    | NKD1            | -0,234278768 | -0,079522948 | -0,15475582 |  |
| 240124_at    | -               | -0,234278768 | -0,079522948 | -0,15475582 |  |
| 243630_at    | NDUFB1          | -0,234278768 | -0,079522948 | -0,15475582 |  |
| 209605_at    | TST             | 3,097712429  | 3,252481567  | -0,15476914 |  |
| 206777_s_at  | CRYBB2 /// CRY  | 0,859074518  | 1,013870809  | -0,15479629 |  |
| 223558_at    | INIP            | 1,666156729  | 1,820984782  | -0,15482805 |  |
| 209457_at    | DUSP5           | 2,365585359  | 2,520531219  | -0,15494586 |  |
| 209778_at    | TRIP11          | 1,215326747  | 1,370274469  | -0,15494772 |  |
| 238043_at    | ARID1B          | 1,442503549  | 1,59747851   | -0,15497496 |  |
| 217983_s_at  | RNASET2         | 4,820071768  | 4,975089315  | -0,15501755 |  |
| 1560328_s_at | -               | -3,192553003 | -3,037500868 | -0,15505213 |  |
| 1562082_at   | -               | -3,192553003 | -3,037500868 | -0,15505213 |  |
| 1562095_at   | LOC100287789 /  | -3,192553003 | -3,037500868 | -0,15505213 |  |
| 1568662_at   | PWRN2           | -3,192553003 | -3,037500868 | -0,15505213 |  |
| 206505_at    | UGT2B4          | -3,192553003 | -3,037500868 | -0,15505213 |  |
| 216686_at    | ANKRD36BP2      | -3,192553003 | -3,037500868 | -0,15505213 |  |
| 223854_at    | PCDHB10 /// PC  | -3,192553003 | -3,037500868 | -0,15505213 |  |
| 232390_at    | NCAM2           | -3,192553003 | -3,037500868 | -0,15505213 |  |
| 232716_at    | -               | -3,192553003 | -3,037500868 | -0,15505213 |  |
| 235743_at    | -               | -3,192553003 | -3,037500868 | -0,15505213 |  |
| 244351_at    | RBM46           | -3,192553003 | -3,037500868 | -0,15505213 |  |
| 201991_s_at  | KIF5B           | 4,026230348  | 4,181349409  | -0,15511906 |  |
| 208757_at    | TMED9           | 4,05440026   | 4,209703428  | -0,15530317 |  |
| 206301_at    | TEC             | 0,661985843  | 0,817300337  | -0,15531449 |  |
| 224156_x_at  | IL17RB          | 0,661985843  | 0,817300337  | -0,15531449 |  |
| 225143_at    | SFXN4           | 2,724770722  | 2,880111483  | -0,15534076 |  |

|              |                 |              |             |             |  |
|--------------|-----------------|--------------|-------------|-------------|--|
| 241541_at    | MIB2            | 0,376672223  | 0,532164371 | -0,15549215 |  |
| 223124_s_at  | PITHD1          | 4,597283315  | 4,752852722 | -0,15556941 |  |
| 222578_s_at  | UBA5            | 3,352164686  | 3,507749374 | -0,15558469 |  |
| 1553681_a_at | PRF1            | -0,148196756 | 0,007421914 | -0,15561867 |  |
| 201557_at    | VAMP2           | -0,148196756 | 0,007421914 | -0,15561867 |  |
| 212559_at    | PRKAR1B         | -0,148196756 | 0,007421914 | -0,15561867 |  |
| 223768_at    | SSR4P1          | -0,148196756 | 0,007421914 | -0,15561867 |  |
| 224005_at    | -               | -0,148196756 | 0,007421914 | -0,15561867 |  |
| 232196_at    | LCA5L           | -0,148196756 | 0,007421914 | -0,15561867 |  |
| 213660_s_at  | TOP3B           | 1,021868205  | 1,177496821 | -0,15562862 |  |
| 235474_at    | -               | 1,406361373  | 1,562009954 | -0,15564858 |  |
| 220160_s_at  | KPTN            | 1,709647566  | 1,865308541 | -0,15566098 |  |
| 216041_x_at  | GRN             | 3,164152611  | 3,319860027 | -0,15570742 |  |
| 228291_s_at  | PLK1S1          | 2,243430036  | 2,39915583  | -0,15572579 |  |
| 201509_at    | IDH3B           | 2,990581579  | 3,146317015 | -0,15573544 |  |
| 204324_s_at  | GOLIM4          | 0,020670649  | 0,176436073 | -0,15576542 |  |
| 215672_s_at  | AHCYL2          | 0,020670649  | 0,176436073 | -0,15576542 |  |
| 215732_s_at  | DTX2 /// LOC100 | 0,020670649  | 0,176436073 | -0,15576542 |  |
| 231019_x_at  | STK11           | 0,020670649  | 0,176436073 | -0,15576542 |  |
| 212863_x_at  | CTBP1           | 4,505354197  | 4,661126158 | -0,15577196 |  |
| 224856_at    | FKBP5           | 2,59162628   | 2,747463672 | -0,15583739 |  |
| 223299_at    | SEC11C          | 2,905386372  | 3,061230246 | -0,15584387 |  |
| 1553982_a_at | RAB7B           | -0,57445847  | -0,41858459 | -0,15587388 |  |
| 1558622_a_at | ZNF548          | -0,57445847  | -0,41858459 | -0,15587388 |  |
| 1559820_at   | -               | -0,57445847  | -0,41858459 | -0,15587388 |  |
| 1560922_s_at | ZNF169          | -0,57445847  | -0,41858459 | -0,15587388 |  |
| 1567319_at   | -               | -0,57445847  | -0,41858459 | -0,15587388 |  |
| 1569268_at   | GRIN2C          | -0,57445847  | -0,41858459 | -0,15587388 |  |
| 207389_at    | GP1BA           | -0,57445847  | -0,41858459 | -0,15587388 |  |
| 216460_at    | LOC100288594    | -0,57445847  | -0,41858459 | -0,15587388 |  |
| 224556_s_at  | LHX6            | -0,57445847  | -0,41858459 | -0,15587388 |  |
| 226497_s_at  | FLT1            | -0,57445847  | -0,41858459 | -0,15587388 |  |
| 229291_at    | -               | -0,57445847  | -0,41858459 | -0,15587388 |  |
| 232129_s_at  | LZTS2           | -0,57445847  | -0,41858459 | -0,15587388 |  |
| 238887_at    | LOC100630918    | -0,57445847  | -0,41858459 | -0,15587388 |  |
| 244616_x_at  | MDM2            | 1,493160564  | 1,64909809  | -0,15593753 |  |
| 213330_s_at  | STIP1           | 4,418803905  | 4,574783153 | -0,15597925 |  |
| 229813_x_at  | DAZAP1          | 4,376357713  | 4,532344882 | -0,15598717 |  |
| 207335_x_at  | ATP5I           | 4,616744979  | 4,772769658 | -0,15602468 |  |
| 208073_x_at  | TTC3 /// TTC3P1 | 5,718762552  | 5,874806316 | -0,15604376 |  |
| 213594_x_at  | SRSF10          | 3,418185797  | 3,574237491 | -0,15605169 |  |
| 213326_at    | VAMP1           | 1,274448124  | 1,43051703  | -0,15606891 |  |
| 210266_s_at  | TRIM33          | 3,554701391  | 3,710868933 | -0,15616754 |  |
| 227176_at    | SLC2A13         | 2,272723257  | 2,428994491 | -0,15627123 |  |
| 204982_at    | GIT2            | 1,168140757  | 1,324440845 | -0,15630009 |  |
| 212355_at    | KHNYN           | 1,954567604  | 2,110887591 | -0,15631999 |  |
| 216548_x_at  | HMGB3P1         | 1,954567604  | 2,110887591 | -0,15631999 |  |
| 203561_at    | FCGR2A          | 2,834621043  | 2,990953566 | -0,15633252 |  |
| 227100_at    | B3GALTL         | 1,305306849  | 1,461646549 | -0,1563397  |  |
| 241959_at    | ANAPC10         | 1,305306849  | 1,461646549 | -0,1563397  |  |
| 203985_at    | ZNF212          | 2,943717636  | 3,100079607 | -0,15636197 |  |
| 200706_s_at  | LITAF           | 3,936854923  | 4,093403416 | -0,15654849 |  |
| 205173_x_at  | CD58            | 3,101484927  | 3,258033502 | -0,15654858 |  |
| 204074_s_at  | CEP104          | 1,201332287  | 1,3579181   | -0,15658581 |  |
| 217889_s_at  | CYBRD1          | 1,90937145   | 2,066015817 | -0,15664437 |  |
| 218886_at    | PAK1IP1         | 4,385153798  | 4,541934651 | -0,15678085 |  |

|              |                |              |              |             |  |
|--------------|----------------|--------------|--------------|-------------|--|
| 219039_at    | SEMA4C         | 1,841816345  | 1,998633167  | -0,15681682 |  |
| 219075_at    | YIPF2          | 1,841816345  | 1,998633167  | -0,15681682 |  |
| 202324_s_at  | ACBD3          | 3,89689195   | 4,053733117  | -0,15684117 |  |
| 1552423_at   | ETV3           | -0,352951799 | -0,19610998  | -0,15684182 |  |
| 215877_at    | C14orf56       | -0,352951799 | -0,19610998  | -0,15684182 |  |
| 232455_x_at  | LOC340085      | -0,352951799 | -0,19610998  | -0,15684182 |  |
| 234767_at    | -              | -0,352951799 | -0,19610998  | -0,15684182 |  |
| 227370_at    | FAM171B        | 1,233777334  | 1,390636111  | -0,15685878 |  |
| 1559808_at   | -              | 0,747935635  | 0,904843258  | -0,15690762 |  |
| 212308_at    | CLASP2         | 0,747935635  | 0,904843258  | -0,15690762 |  |
| 218865_at    | MARC1          | 0,747935635  | 0,904843258  | -0,15690762 |  |
| 209485_s_at  | OSBPL1A        | 0,648296226  | 0,805216064  | -0,15691984 |  |
| 233540_s_at  | CDK5RAP2       | 2,069451339  | 2,226407528  | -0,15695619 |  |
| 210946_at    | PPAP2A         | 3,691139316  | 3,848241888  | -0,15710257 |  |
| 217785_s_at  | YKT6           | 1,926486359  | 2,083632167  | -0,15714581 |  |
| 202513_s_at  | PPP2R5D        | 2,510717331  | 2,667949403  | -0,15723207 |  |
| 207338_s_at  | ZNF200         | 3,408067074  | 3,565308644  | -0,15724157 |  |
| 202785_at    | NDUFA7         | 3,545499171  | 3,702749166  | -0,15725    |  |
| 217801_at    | ATP5E          | 6,79064706   | 6,947924687  | -0,15727763 |  |
| 35179_at     | B3GAT3         | 0,592200562  | 0,749548133  | -0,15734757 |  |
| 209633_at    | PPP2R3A        | 1,814495998  | 1,971855016  | -0,15735902 |  |
| 203394_s_at  | HES1           | 2,122398022  | 2,27978304   | -0,15738502 |  |
| 207126_x_at  | UGT1A1 /// UGT | 0,480753764  | 0,638150376  | -0,15739661 |  |
| 242680_at    | AVPR1A         | 3,262904562  | 3,420331607  | -0,15742705 |  |
| 223182_s_at  | AGPAT3         | 3,902669169  | 4,060103278  | -0,15743411 |  |
| 1553594_a_at | INSL3          | 0,359971644  | 0,51742585   | -0,15745421 |  |
| 208868_s_at  | GABARAPL1      | 0,359971644  | 0,51742585   | -0,15745421 |  |
| 230484_at    | CHDH           | 0,359971644  | 0,51742585   | -0,15745421 |  |
| 218763_at    | STX18          | 1,835789711  | 1,993317152  | -0,15752744 |  |
| 1552808_at   | ADAMTSL1       | -3,15396682  | -2,996335703 | -0,15763112 |  |
| 1553546_at   | PRO2012        | -3,15396682  | -2,996335703 | -0,15763112 |  |
| 1556873_at   | MEX3C          | -3,15396682  | -2,996335703 | -0,15763112 |  |
| 1556944_at   | -              | -3,15396682  | -2,996335703 | -0,15763112 |  |
| 1557486_at   | -              | -3,15396682  | -2,996335703 | -0,15763112 |  |
| 1561953_at   | -              | -3,15396682  | -2,996335703 | -0,15763112 |  |
| 1570208_at   | LOC284260      | -3,15396682  | -2,996335703 | -0,15763112 |  |
| 1570506_at   | -              | -3,15396682  | -2,996335703 | -0,15763112 |  |
| 214071_at    | GNAL           | -3,15396682  | -2,996335703 | -0,15763112 |  |
| 226834_at    | -              | -3,15396682  | -2,996335703 | -0,15763112 |  |
| 229973_at    | C1orf173       | -3,15396682  | -2,996335703 | -0,15763112 |  |
| 240966_at    | SH3TC2         | -3,15396682  | -2,996335703 | -0,15763112 |  |
| 242249_at    | -              | -3,15396682  | -2,996335703 | -0,15763112 |  |
| 242493_at    | PTPRD          | -3,15396682  | -2,996335703 | -0,15763112 |  |
| 242802_x_at  | -              | -3,15396682  | -2,996335703 | -0,15763112 |  |
| 226807_at    | ZFP1           | 2,156646206  | 2,314300277  | -0,15765407 |  |
| 219636_s_at  | ARMC9          | -0,078265071 | 0,079428135  | -0,15769321 |  |
| 230810_at    | JMJD4          | -0,078265071 | 0,079428135  | -0,15769321 |  |
| 218729_at    | LXN            | 5,927087734  | 6,084787619  | -0,15769988 |  |
| 225693_s_at  | CAMTA1         | 4,538199871  | 4,695903811  | -0,15770394 |  |
| 1557679_at   | ERICH1-AS1     | -0,888496123 | -0,730778808 | -0,15771731 |  |
| 207895_at    | NAALADL1       | -0,888496123 | -0,730778808 | -0,15771731 |  |
| 214312_at    | FOXA2          | -0,888496123 | -0,730778808 | -0,15771731 |  |
| 214332_s_at  | TSFM           | -0,888496123 | -0,730778808 | -0,15771731 |  |
| 215366_at    | SNX13          | -0,888496123 | -0,730778808 | -0,15771731 |  |
| 232769_at    | -              | -0,888496123 | -0,730778808 | -0,15771731 |  |
| 224704_at    | TNRC6A         | 3,004080279  | 3,161800893  | -0,15772061 |  |

|              |              |              |              |             |  |
|--------------|--------------|--------------|--------------|-------------|--|
| 201044_x_at  | DUSP1        | -0,259832361 | -0,102100538 | -0,15773182 |  |
| 207228_at    | PRKACG       | -0,259832361 | -0,102100538 | -0,15773182 |  |
| 238223_at    | -            | -0,259832361 | -0,102100538 | -0,15773182 |  |
| 211955_at    | IPO5         | 4,391844214  | 4,549651379  | -0,15780717 |  |
| 208730_x_at  | RAB2A        | 0,533835206  | 0,691645685  | -0,15781048 |  |
| 233255_s_at  | BIVM         | 0,533835206  | 0,691645685  | -0,15781048 |  |
| 210561_s_at  | WSB1         | 4,181024227  | 4,338964815  | -0,15794059 |  |
| 211317_s_at  | CFLAR        | 1,638726528  | 1,796776588  | -0,15805006 |  |
| 208700_s_at  | TKT          | 4,311065622  | 4,469125898  | -0,15806028 |  |
| 231086_at    | -            | 1,079110292  | 1,23718272   | -0,15807243 |  |
| 201661_s_at  | ACSL3        | 3,25727902   | 3,415371412  | -0,15809239 |  |
| 1553383_at   | ARHGAP42     | -2,779459409 | -2,621331989 | -0,15812742 |  |
| 1554965_at   | FILIP1L      | -2,779459409 | -2,621331989 | -0,15812742 |  |
| 1558048_x_at | -            | -2,779459409 | -2,621331989 | -0,15812742 |  |
| 1558599_at   | -            | -2,779459409 | -2,621331989 | -0,15812742 |  |
| 1560756_at   | -            | -2,779459409 | -2,621331989 | -0,15812742 |  |
| 1561083_at   | -            | -2,779459409 | -2,621331989 | -0,15812742 |  |
| 1561260_at   | -            | -2,779459409 | -2,621331989 | -0,15812742 |  |
| 1561672_at   | -            | -2,779459409 | -2,621331989 | -0,15812742 |  |
| 1561924_at   | -            | -2,779459409 | -2,621331989 | -0,15812742 |  |
| 1562727_at   | -            | -2,779459409 | -2,621331989 | -0,15812742 |  |
| 1563671_at   | LACE1        | -2,779459409 | -2,621331989 | -0,15812742 |  |
| 1570194_x_at | -            | -2,779459409 | -2,621331989 | -0,15812742 |  |
| 210600_s_at  | GRK4         | -2,779459409 | -2,621331989 | -0,15812742 |  |
| 215059_at    | -            | -2,779459409 | -2,621331989 | -0,15812742 |  |
| 216539_at    | ATXN3L       | -2,779459409 | -2,621331989 | -0,15812742 |  |
| 224463_s_at  | C11orf70     | -2,779459409 | -2,621331989 | -0,15812742 |  |
| 230425_at    | EPHB1        | -2,779459409 | -2,621331989 | -0,15812742 |  |
| 231336_at    | CPNE4        | -2,779459409 | -2,621331989 | -0,15812742 |  |
| 233542_at    | -            | -2,779459409 | -2,621331989 | -0,15812742 |  |
| 234009_at    | -            | -2,779459409 | -2,621331989 | -0,15812742 |  |
| 237529_at    | LOC100507143 | -2,779459409 | -2,621331989 | -0,15812742 |  |
| 243858_at    | -            | -2,779459409 | -2,621331989 | -0,15812742 |  |
| 243986_at    | LINC00355    | -2,779459409 | -2,621331989 | -0,15812742 |  |
| 244885_at    | EBF2         | -2,779459409 | -2,621331989 | -0,15812742 |  |
| 1554220_a_at | -            | 0,152582607  | 0,310717132  | -0,15813453 |  |
| 225066_at    | PPP2R2D      | 0,152582607  | 0,310717132  | -0,15813453 |  |
| 204050_s_at  | CLTA         | 5,484854879  | 5,643041531  | -0,15818665 |  |
| 212712_at    | CAMSAP1      | 1,874520207  | 2,032717854  | -0,15819765 |  |
| 200820_at    | PSMD8        | 6,336455227  | 6,494709105  | -0,15825388 |  |
| 227472_at    | DDA1         | -0,00073712  | 0,157549243  | -0,15828636 |  |
| 217100_s_at  | UBXN7        | 0,82905153   | 0,987376598  | -0,15832507 |  |
| 226373_at    | SFXN5        | 0,82905153   | 0,987376598  | -0,15832507 |  |
| 239600_at    | -            | 0,82905153   | 0,987376598  | -0,15832507 |  |
| 225079_at    | EMP2         | 1,114389003  | 1,272721751  | -0,15833275 |  |
| 217732_s_at  | ITM2B        | 6,250865053  | 6,409219924  | -0,15835487 |  |
| 208954_s_at  | LARP4B       | 2,254767157  | 2,413157372  | -0,15839021 |  |
| 233228_at    | -            | 0,735041319  | 0,893473268  | -0,15843195 |  |
| 217612_at    | TIMM50       | 0,95671774   | 1,115234684  | -0,15851694 |  |
| 224500_s_at  | MON1A        | 0,95671774   | 1,115234684  | -0,15851694 |  |
| 228569_at    | PAPOLA       | 1,995690482  | 2,154405725  | -0,15871524 |  |
| 229278_at    | USP51        | 2,497416546  | 2,656223838  | -0,15880729 |  |
| 221875_x_at  | HLA-F        | 4,406149819  | 4,564962102  | -0,15881228 |  |
| 203314_at    | GTPBP6       | 2,755423794  | 2,914267328  | -0,15884353 |  |
| 209535_s_at  | -            | 1,631786706  | 1,790660532  | -0,15887383 |  |
| 212549_at    | STAT5B       | 2,790121796  | 2,949006836  | -0,15888504 |  |

|              |                  |              |              |             |  |
|--------------|------------------|--------------|--------------|-------------|--|
| 218358_at    | CRELD2           | 3,868391882  | 4,027317343  | -0,15892546 |  |
| 226155_at    | FAM160B1         | 1,932146506  | 2,091116676  | -0,15897017 |  |
| 43544_at     | MED16            | 2,590731889  | 2,749829978  | -0,15909809 |  |
| 226383_at    | ARL14EP          | 1,951783949  | 2,110887591  | -0,15910364 |  |
| 45288_at     | ABHD6            | -0,278322961 | -0,119189837 | -0,15913312 |  |
| 228272_at    | DNLZ             | 2,940912947  | 3,100079607  | -0,15916666 |  |
| 201812_s_at  | C4orf46 /// TOMN | 5,497555851  | 5,656766959  | -0,15921111 |  |
| 226390_at    | STARD4           | 2,691784869  | 2,851017268  | -0,1592324  |  |
| 1554671_a_at | SRRM2            | 0,46522187   | 0,624460759  | -0,15923889 |  |
| 201708_s_at  | NIPSNAP1         | 1,865674241  | 2,024923328  | -0,15924909 |  |
| 214107_x_at  | LOC440434        | 2,030406107  | 2,189694216  | -0,15928811 |  |
| 214795_at    | ZMYND8           | 0,627515113  | 0,786897721  | -0,15938261 |  |
| 225085_at    | USP40            | 0,627515113  | 0,786897721  | -0,15938261 |  |
| 203385_at    | DGKA             | 0,841135803  | 1,000684521  | -0,15954872 |  |
| 209670_at    | TRAC             | 0,841135803  | 1,000684521  | -0,15954872 |  |
| 215533_s_at  | UBE4B            | 0,841135803  | 1,000684521  | -0,15954872 |  |
| 203085_s_at  | TGFB1            | 3,49093683   | 3,650516168  | -0,15957934 |  |
| 1552937_s_at | ATRIP            | 1,210676994  | 1,370274469  | -0,15959748 |  |
| 224708_at    | KIAA2013         | 3,112743591  | 3,272369332  | -0,15962574 |  |
| 202013_s_at  | EXT2             | 1,987559146  | 2,147243253  | -0,15968411 |  |
| 229001_at    | PPP1R3E          | 0,67554678   | 0,835239052  | -0,15969227 |  |
| 218681_s_at  | SDF2L1           | 3,183265014  | 3,343031718  | -0,1597667  |  |
| 205566_at    | ABHD2            | 3,446146386  | 3,605931378  | -0,15978499 |  |
| 229606_at    | -                | 3,735513868  | 3,895315489  | -0,15980162 |  |
| 212270_x_at  | RPL17 /// RPL17  | 7,578998493  | 7,738804198  | -0,15980571 |  |
| 209922_at    | BRAP             | 0,945567441  | 1,105412836  | -0,15984539 |  |
| 235488_at    | RASL10B          | 2,11992033   | 2,27978304   | -0,15986271 |  |
| 235322_at    | LOC100506694     | 1,515954005  | 1,675891488  | -0,15993748 |  |
| 207643_s_at  | TNFRSF1A         | 3,870604295  | 4,030564794  | -0,1599605  |  |
| 1552399_a_at | BRF1             | -1,424023738 | -1,264005341 | -0,1600184  |  |
| 1559017_at   | LOC100507351     | -1,424023738 | -1,264005341 | -0,1600184  |  |
| 1559097_at   | C14orf64         | -1,424023738 | -1,264005341 | -0,1600184  |  |
| 1560295_at   | CYP19A1          | -1,424023738 | -1,264005341 | -0,1600184  |  |
| 1561006_at   | -                | -1,424023738 | -1,264005341 | -0,1600184  |  |
| 1561298_at   | -                | -1,424023738 | -1,264005341 | -0,1600184  |  |
| 210985_s_at  | SP100            | -1,424023738 | -1,264005341 | -0,1600184  |  |
| 211816_x_at  | FCAR             | -1,424023738 | -1,264005341 | -0,1600184  |  |
| 214777_at    | -                | -1,424023738 | -1,264005341 | -0,1600184  |  |
| 215740_at    | LOC100130741     | -1,424023738 | -1,264005341 | -0,1600184  |  |
| 217325_at    | KRT3             | -1,424023738 | -1,264005341 | -0,1600184  |  |
| 222546_s_at  | EPS8L2           | -1,424023738 | -1,264005341 | -0,1600184  |  |
| 230080_at    | HOXA-AS2         | -1,424023738 | -1,264005341 | -0,1600184  |  |
| 231472_at    | FBXO15           | -1,424023738 | -1,264005341 | -0,1600184  |  |
| 231834_at    | RBM33            | -1,424023738 | -1,264005341 | -0,1600184  |  |
| 233052_at    | DNAH8            | -1,424023738 | -1,264005341 | -0,1600184  |  |
| 236964_at    | -                | -1,424023738 | -1,264005341 | -0,1600184  |  |
| 237849_at    | -                | -1,424023738 | -1,264005341 | -0,1600184  |  |
| 215714_s_at  | SMARCA4          | 5,618770293  | 5,778812458  | -0,16004216 |  |
| 209604_s_at  | GATA3            | 0,984222186  | 1,144305291  | -0,16008311 |  |
| 218491_s_at  | THYN1            | 3,436222554  | 3,596320795  | -0,16009824 |  |
| 209191_at    | TUBB6            | 4,874734727  | 5,034848761  | -0,16011403 |  |
| 1557816_a_at | -                | 0,273439642  | 0,433557298  | -0,16011766 |  |
| 219893_at    | CCDC71           | 0,273439642  | 0,433557298  | -0,16011766 |  |
| 223571_at    | C1QTNF6          | 0,273439642  | 0,433557298  | -0,16011766 |  |
| 225893_at    | RC3H1            | 2,802535172  | 2,962671751  | -0,16013658 |  |
| 203536_s_at  | CIAO1            | 3,12638592   | 3,28656411   | -0,16017819 |  |

|              |              |              |              |             |  |
|--------------|--------------|--------------|--------------|-------------|--|
| 218429_s_at  | C19orf66     | 3,554701391  | 3,714911743  | -0,16021035 |  |
| 1552975_x_at | -            | -3,114791413 | -2,954576755 | -0,16021466 |  |
| 1554723_x_at | -            | -3,114791413 | -2,954576755 | -0,16021466 |  |
| 1556624_at   | -            | -3,114791413 | -2,954576755 | -0,16021466 |  |
| 1558225_at   | -            | -3,114791413 | -2,954576755 | -0,16021466 |  |
| 1558786_at   | TSPAN3       | -3,114791413 | -2,954576755 | -0,16021466 |  |
| 1563052_at   | -            | -3,114791413 | -2,954576755 | -0,16021466 |  |
| 1569454_a_at | LOC283352    | -3,114791413 | -2,954576755 | -0,16021466 |  |
| 1570207_at   | FRRS1        | -3,114791413 | -2,954576755 | -0,16021466 |  |
| 204036_at    | LPAR1        | -3,114791413 | -2,954576755 | -0,16021466 |  |
| 207580_at    | MAGEB4       | -3,114791413 | -2,954576755 | -0,16021466 |  |
| 214660_at    | ITGA1        | -3,114791413 | -2,954576755 | -0,16021466 |  |
| 231384_at    | GRIN2A       | -3,114791413 | -2,954576755 | -0,16021466 |  |
| 234632_x_at  | -            | -3,114791413 | -2,954576755 | -0,16021466 |  |
| 234709_at    | CAPN13       | -3,114791413 | -2,954576755 | -0,16021466 |  |
| 239872_at    | -            | -3,114791413 | -2,954576755 | -0,16021466 |  |
| 240965_at    | -            | -3,114791413 | -2,954576755 | -0,16021466 |  |
| 241532_at    | -            | -3,114791413 | -2,954576755 | -0,16021466 |  |
| 244125_at    | -            | -3,114791413 | -2,954576755 | -0,16021466 |  |
| 209903_s_at  | ATR          | 2,879254447  | 3,039473081  | -0,16021863 |  |
| 203254_s_at  | TLN1         | 1,567778694  | 1,728030156  | -0,16025146 |  |
| 209710_at    | GATA2        | 3,85579038   | 4,016221008  | -0,16043063 |  |
| 215701_at    | -            | 0,133056859  | 0,293518836  | -0,16046198 |  |
| 220904_at    | LINC00574    | 0,133056859  | 0,293518836  | -0,16046198 |  |
| 238529_at    | -            | 0,133056859  | 0,293518836  | -0,16046198 |  |
| 1569579_at   | -            | 0,334552598  | 0,495031851  | -0,16047925 |  |
| 218608_at    | ATP13A2      | 0,334552598  | 0,495031851  | -0,16047925 |  |
| 219084_at    | NSD1         | 0,334552598  | 0,495031851  | -0,16047925 |  |
| 224300_x_at  | FTCD         | 0,334552598  | 0,495031851  | -0,16047925 |  |
| 201695_s_at  | PNP          | 4,565770118  | 4,726262343  | -0,16049223 |  |
| 201625_s_at  | INSIG1       | 1,454352496  | 1,614891062  | -0,16053857 |  |
| 229498_at    | MBNL3        | 1,897847661  | 2,058399602  | -0,16055194 |  |
| 238944_at    | LOC100505715 | 1,897847661  | 2,058399602  | -0,16055194 |  |
| 218188_s_at  | TIMM13       | 4,842787231  | 5,003461658  | -0,16067443 |  |
| 225896_at    | MPRIP        | 0,715481152  | 0,876248481  | -0,16076733 |  |
| 221744_at    | DCAF7        | 2,819431021  | 2,980244813  | -0,16081379 |  |
| 223211_at    | HACL1        | 3,111496958  | 3,272369332  | -0,16087237 |  |
| 225889_at    | AEBP2        | 2,109966786  | 2,271023131  | -0,16105634 |  |
| 204033_at    | TRIP13       | 4,00557508   | 4,166665505  | -0,16109042 |  |
| 218887_at    | MRPL2        | 2,520143371  | 2,681234383  | -0,16109101 |  |
| 226368_at    | CHST11       | 1,05337236   | 1,214517879  | -0,16114552 |  |
| 212303_x_at  | KHSRP        | 1,954567604  | 2,115788273  | -0,16122067 |  |
| 218770_s_at  | TMEM39B      | 1,954567604  | 2,115788273  | -0,16122067 |  |
| 226257_x_at  | MRPS22       | 4,608815095  | 4,770052187  | -0,16123709 |  |
| 223664_x_at  | BCL2L13      | 1,504602299  | 1,665902186  | -0,16129989 |  |
| 1554668_a_at | FAM151A      | -0,622910612 | -0,461594427 | -0,16131619 |  |
| 206407_s_at  | CCL13        | -0,622910612 | -0,461594427 | -0,16131619 |  |
| 210199_at    | CRYAA        | -0,622910612 | -0,461594427 | -0,16131619 |  |
| 216656_at    | -            | -0,622910612 | -0,461594427 | -0,16131619 |  |
| 221114_at    | AMBN         | -0,622910612 | -0,461594427 | -0,16131619 |  |
| 221234_s_at  | BACH2        | -0,622910612 | -0,461594427 | -0,16131619 |  |
| 229021_at    | MCTP2        | -0,622910612 | -0,461594427 | -0,16131619 |  |
| 231524_at    | KCNAB1       | -0,622910612 | -0,461594427 | -0,16131619 |  |
| 235968_at    | AGAP1        | -0,622910612 | -0,461594427 | -0,16131619 |  |
| 236186_x_at  | IL17RE       | -0,622910612 | -0,461594427 | -0,16131619 |  |
| 238801_at    | RBM33        | -0,622910612 | -0,461594427 | -0,16131619 |  |

|              |                 |              |              |             |  |
|--------------|-----------------|--------------|--------------|-------------|--|
| 239762_at    | LOC286437       | -0,622910612 | -0,461594427 | -0,16131619 |  |
| 223286_at    | C17orf81        | 3,107750584  | 3,269073685  | -0,1613231  |  |
| 201369_s_at  | ZFP36L2         | 2,327437554  | 2,488772006  | -0,16133445 |  |
| 201451_x_at  | RHEB            | -0,926850548 | -0,765504029 | -0,16134652 |  |
| 209952_s_at  | MAP2K7          | -0,926850548 | -0,765504029 | -0,16134652 |  |
| 210545_at    | ITSN2           | -0,926850548 | -0,765504029 | -0,16134652 |  |
| 210608_s_at  | FUT2            | -0,926850548 | -0,765504029 | -0,16134652 |  |
| 213678_at    | TMEM151B        | -0,926850548 | -0,765504029 | -0,16134652 |  |
| 217682_at    | -               | -0,926850548 | -0,765504029 | -0,16134652 |  |
| 230707_at    | SORL1           | -0,926850548 | -0,765504029 | -0,16134652 |  |
| 239955_at    | -               | -0,926850548 | -0,765504029 | -0,16134652 |  |
| 241375_at    | USP38           | -0,926850548 | -0,765504029 | -0,16134652 |  |
| 242044_at    | -               | -0,926850548 | -0,765504029 | -0,16134652 |  |
| 243560_at    | -               | -0,926850548 | -0,765504029 | -0,16134652 |  |
| 200918_s_at  | SRPR            | 3,28739962   | 3,448769219  | -0,1613696  |  |
| 235274_at    | -               | 3,088871381  | 3,250254796  | -0,16138341 |  |
| 221850_x_at  | AGAP11 /// AGAP | 2,051361651  | 2,212749286  | -0,16138763 |  |
| 223200_s_at  | LSG1            | 2,051361651  | 2,212749286  | -0,16138763 |  |
| 208687_x_at  | HSPA8 /// SNOR  | 7,117439474  | 7,278828479  | -0,161389   |  |
| 235309_at    | RPS15A          | 1,326951551  | 1,488344553  | -0,161393   |  |
| 227993_at    | METAP2          | 3,517535002  | 3,678940066  | -0,16140506 |  |
| 222824_at    | NUDT5           | 1,530951994  | 1,692388143  | -0,16143615 |  |
| 225342_at    | AK4 /// LOC1005 | 4,449221925  | 4,610810952  | -0,16158903 |  |
| 223461_at    | TBC1D7          | 4,502028124  | 4,66363827   | -0,16161015 |  |
| 222407_s_at  | ZFP106          | 2,159061673  | 2,320681318  | -0,16161964 |  |
| 201411_s_at  | PLEKHB2         | 3,22766727   | 3,38929984   | -0,16163257 |  |
| 212131_at    | LSM14A          | 5,61745352   | 5,779102096  | -0,16164858 |  |
| 231845_at    | AARS2           | 2,355089531  | 2,516830926  | -0,16174139 |  |
| 60528_at     | JMJD7 /// JMJD7 | 1,500798461  | 1,662556988  | -0,16175853 |  |
| 210208_x_at  | BAG6            | 4,916378816  | 5,078176444  | -0,16179763 |  |
| 228560_at    | -               | 0,606430281  | 0,768343791  | -0,16191351 |  |
| 224331_s_at  | MRPL36          | 5,033892654  | 5,19595081   | -0,16205816 |  |
| 219045_at    | RHOF            | 0,44160593   | 0,603679647  | -0,16207372 |  |
| 218505_at    | WDR59           | 3,304956562  | 3,467101363  | -0,1621448  |  |
| 1563250_at   | -               | -0,033456564 | 0,128747141  | -0,1622037  |  |
| 1569470_a_at | FRMD5           | -0,033456564 | 0,128747141  | -0,1622037  |  |
| 207244_x_at  | CYP2A6          | -0,033456564 | 0,128747141  | -0,1622037  |  |
| 208055_s_at  | HERC4           | -0,033456564 | 0,128747141  | -0,1622037  |  |
| 220494_s_at  | -               | -0,033456564 | 0,128747141  | -0,1622037  |  |
| 226045_at    | FRS2            | -0,033456564 | 0,128747141  | -0,1622037  |  |
| 240146_at    | -               | -0,033456564 | 0,128747141  | -0,1622037  |  |
| 243298_at    | -               | -0,033456564 | 0,128747141  | -0,1622037  |  |
| 203113_s_at  | EEF1D           | 6,325878897  | 6,488110024  | -0,16223113 |  |
| 222840_at    | ATG2B           | 0,255492549  | 0,417770464  | -0,16227791 |  |
| 224201_s_at  | SUFU            | 0,255492549  | 0,417770464  | -0,16227791 |  |
| 223028_s_at  | SNX9            | 2,807162789  | 2,969455976  | -0,16229319 |  |
| 232975_at    | HCG18           | 0,702292136  | 0,864649967  | -0,16235783 |  |
| 233982_x_at  | STYXL1          | 2,783874823  | 2,946258252  | -0,16238343 |  |
| 1565617_at   | -               | -0,299034815 | -0,136643983 | -0,16239083 |  |
| 213717_at    | LDB3            | -0,299034815 | -0,136643983 | -0,16239083 |  |
| 200904_at    | HLA-E           | 3,170152481  | 3,332545245  | -0,16239276 |  |
| 222506_at    | LMBR1           | 2,134723057  | 2,297144887  | -0,16242183 |  |
| 225715_at    | RPTOR           | 1,318332599  | 1,480766833  | -0,16243423 |  |
| 1566105_at   | MFN2            | 0,317354302  | 0,479907041  | -0,16255274 |  |
| 223158_s_at  | NEK6            | 0,317354302  | 0,479907041  | -0,16255274 |  |
| 202816_s_at  | SS18            | 2,747420128  | 2,910041809  | -0,16262168 |  |



|              |              |              |              |             |  |
|--------------|--------------|--------------|--------------|-------------|--|
| 207231_at    | DZIP3        | -0,512251684 | -0,34958478  | -0,1626669  |  |
| 229320_at    | C2orf55      | -0,512251684 | -0,34958478  | -0,1626669  |  |
| 226452_at    | PDK1         | 2,758612869  | 2,921282473  | -0,1626696  |  |
| 225853_at    | GNPNAT1      | 3,996149072  | 4,158970399  | -0,16282133 |  |
| 205235_s_at  | KIF20B       | 2,931053371  | 3,09388391   | -0,16283054 |  |
| 225842_at    | PHLDA1       | 2,546213279  | 2,709065209  | -0,16285193 |  |
| 226200_at    | VAR52        | 3,076146581  | 3,239069096  | -0,16292251 |  |
| 210105_s_at  | FYN          | 3,367911651  | 3,530865925  | -0,16295427 |  |
| 221907_at    | TRMT61A      | 2,038300149  | 2,201267805  | -0,16296766 |  |
| 217978_s_at  | UBE2Q1       | 3,805796305  | 3,968932193  | -0,16313589 |  |
| 200658_s_at  | PHB          | 5,266459488  | 5,429630239  | -0,16317075 |  |
| 220085_at    | HELLS        | 1,073999308  | 1,23718272   | -0,16318341 |  |
| 200850_s_at  | AHCYL1       | 4,760076998  | 4,923268148  | -0,16319115 |  |
| 224513_s_at  | UBQLN4       | 3,223057183  | 3,386261038  | -0,16320385 |  |
| 1557450_s_at | WHAMMP2      | 0,917308734  | 1,080561626  | -0,16325289 |  |
| 1557527_at   | -            | 0,917308734  | 1,080561626  | -0,16325289 |  |
| 211812_s_at  | B3GALNT1     | 0,917308734  | 1,080561626  | -0,16325289 |  |
| 212660_at    | PHF15        | 0,917308734  | 1,080561626  | -0,16325289 |  |
| 1554725_at   | RABGAP1L     | -2,667025278 | -2,503677622 | -0,16334766 |  |
| 1556580_a_at | -            | -2,667025278 | -2,503677622 | -0,16334766 |  |
| 1558451_at   | LOC285500    | -2,667025278 | -2,503677622 | -0,16334766 |  |
| 1560867_a_at | -            | -2,667025278 | -2,503677622 | -0,16334766 |  |
| 1563474_at   | METTL20      | -2,667025278 | -2,503677622 | -0,16334766 |  |
| 1564790_at   | ST7-AS2      | -2,667025278 | -2,503677622 | -0,16334766 |  |
| 1565746_at   | LOC100132815 | -2,667025278 | -2,503677622 | -0,16334766 |  |
| 206740_x_at  | SYCP1        | -2,667025278 | -2,503677622 | -0,16334766 |  |
| 207402_at    | ZNF132       | -2,667025278 | -2,503677622 | -0,16334766 |  |
| 214636_at    | CALCB        | -2,667025278 | -2,503677622 | -0,16334766 |  |
| 225782_at    | MSRB3        | -2,667025278 | -2,503677622 | -0,16334766 |  |
| 227971_at    | NRK          | -2,667025278 | -2,503677622 | -0,16334766 |  |
| 230711_at    | -            | -2,667025278 | -2,503677622 | -0,16334766 |  |
| 231711_at    | ACPP         | -2,667025278 | -2,503677622 | -0,16334766 |  |
| 233672_s_at  | -            | -2,667025278 | -2,503677622 | -0,16334766 |  |
| 234240_at    | -            | -2,667025278 | -2,503677622 | -0,16334766 |  |
| 236646_at    | C12orf59     | -2,667025278 | -2,503677622 | -0,16334766 |  |
| 237198_at    | -            | -2,667025278 | -2,503677622 | -0,16334766 |  |
| 237357_at    | OSTM1-AS1    | -2,667025278 | -2,503677622 | -0,16334766 |  |
| 237682_at    | -            | -2,667025278 | -2,503677622 | -0,16334766 |  |
| 240065_at    | FAM81B       | -2,667025278 | -2,503677622 | -0,16334766 |  |
| 240304_s_at  | TMC5         | -2,667025278 | -2,503677622 | -0,16334766 |  |
| 241289_at    | -            | -2,667025278 | -2,503677622 | -0,16334766 |  |
| 241527_at    | -            | -2,667025278 | -2,503677622 | -0,16334766 |  |
| 241564_at    | GLOD5        | -2,667025278 | -2,503677622 | -0,16334766 |  |
| 243233_at    | -            | -2,667025278 | -2,503677622 | -0,16334766 |  |
| 243316_x_at  | VPS26A       | -2,667025278 | -2,503677622 | -0,16334766 |  |
| 243892_at    | -            | -2,667025278 | -2,503677622 | -0,16334766 |  |
| 1554241_at   | COCH         | 2,568189989  | 2,731588328  | -0,16339834 |  |
| 203091_at    | FUBP1        | 3,734704399  | 3,898162764  | -0,16345836 |  |
| 207543_s_at  | P4HA1        | 3,277429131  | 3,440980183  | -0,16355105 |  |
| 1563687_a_at | FRYL         | -1,173767127 | -1,010192375 | -0,16357475 |  |
| 1565998_at   | LOC286299    | -1,173767127 | -1,010192375 | -0,16357475 |  |
| 215072_x_at  | C10orf137    | -1,173767127 | -1,010192375 | -0,16357475 |  |
| 218796_at    | FERMT1       | -1,173767127 | -1,010192375 | -0,16357475 |  |
| 224157_at    | KAAG1        | -1,173767127 | -1,010192375 | -0,16357475 |  |
| 230709_x_at  | ZBTB7A       | -1,173767127 | -1,010192375 | -0,16357475 |  |
| 236386_at    | SUZ12P       | -1,173767127 | -1,010192375 | -0,16357475 |  |

|              |                  |              |              |             |  |
|--------------|------------------|--------------|--------------|-------------|--|
| 236462_at    | -                | -1,173767127 | -1,010192375 | -0,16357475 |  |
| 225192_at    | CACUL1           | 3,088871381  | 3,252481567  | -0,16361019 |  |
| 1554575_a_at | BPNT1            | 1,485482016  | 1,64909809   | -0,16361607 |  |
| 214847_s_at  | GPSM3            | 0,592200562  | 0,755840599  | -0,16364004 |  |
| 241813_at    | MBD1             | 0,592200562  | 0,755840599  | -0,16364004 |  |
| 216054_x_at  | MYL4             | 6,304081567  | 6,467770394  | -0,16368883 |  |
| 208917_x_at  | NADK             | 1,64218396   | 1,805902329  | -0,16371837 |  |
| 207159_x_at  | CRTC1            | 0,641402394  | 0,805216064  | -0,16381367 |  |
| 204327_s_at  | ZNF202           | 1,426552034  | 1,590454215  | -0,16390218 |  |
| 203173_s_at  | C16orf62         | 2,208874124  | 2,372786857  | -0,16391273 |  |
| 208630_at    | HADHA            | 3,869867201  | 4,033804952  | -0,16393775 |  |
| 208979_at    | NCOA6            | 3,608715137  | 3,7726819    | -0,16396676 |  |
| 238430_x_at  | SLFN5            | 0,425644434  | 0,589657387  | -0,16401295 |  |
| 240983_s_at  | CARS             | 1,735773781  | 1,899812471  | -0,16403869 |  |
| 212146_at    | PLEKHM2          | 1,139070151  | 1,303116084  | -0,16404593 |  |
| 220202_s_at  | RC3H2            | 1,139070151  | 1,303116084  | -0,16404593 |  |
| 227042_at    | YDJC             | 2,562727117  | 2,726791458  | -0,16406434 |  |
| 1556292_s_at | POM121L12        | 0,103263601  | 0,26733076   | -0,16406716 |  |
| 1561685_a_at | LOC441178        | 0,103263601  | 0,26733076   | -0,16406716 |  |
| 203370_s_at  | PDLIM7           | 0,103263601  | 0,26733076   | -0,16406716 |  |
| 1553260_s_at | ALS2CR11         | -3,054236653 | -2,89013181  | -0,16410484 |  |
| 1555444_a_at | PPP1R12B         | -3,054236653 | -2,89013181  | -0,16410484 |  |
| 1556898_at   | LOC200830        | -3,054236653 | -2,89013181  | -0,16410484 |  |
| 1558779_at   | H2AFY            | -3,054236653 | -2,89013181  | -0,16410484 |  |
| 1562528_at   | -                | -3,054236653 | -2,89013181  | -0,16410484 |  |
| 1563149_at   | -                | -3,054236653 | -2,89013181  | -0,16410484 |  |
| 1569956_at   | MYLK             | -3,054236653 | -2,89013181  | -0,16410484 |  |
| 1570352_at   | ATM              | -3,054236653 | -2,89013181  | -0,16410484 |  |
| 1570423_at   | FLG-AS1          | -3,054236653 | -2,89013181  | -0,16410484 |  |
| 210464_at    | LINC00588        | -3,054236653 | -2,89013181  | -0,16410484 |  |
| 219134_at    | ELTD1            | -3,054236653 | -2,89013181  | -0,16410484 |  |
| 220785_at    | UTS2             | -3,054236653 | -2,89013181  | -0,16410484 |  |
| 221076_at    | -                | -3,054236653 | -2,89013181  | -0,16410484 |  |
| 222336_at    | C4orf34          | -3,054236653 | -2,89013181  | -0,16410484 |  |
| 229546_at    | FAM84A /// LOC6  | -3,054236653 | -2,89013181  | -0,16410484 |  |
| 233460_at    | -                | -3,054236653 | -2,89013181  | -0,16410484 |  |
| 234123_at    | -                | -3,054236653 | -2,89013181  | -0,16410484 |  |
| 241500_at    | CDH8             | -3,054236653 | -2,89013181  | -0,16410484 |  |
| 218503_at    | FOCAD            | 2,288253583  | 2,452428893  | -0,16417531 |  |
| 222785_x_at  | C11orf1          | 2,745814053  | 2,910041809  | -0,16422776 |  |
| 224516_s_at  | CXXC5            | 4,544680214  | 4,708935     | -0,16425479 |  |
| 217189_s_at  | SMG7             | 0,171847695  | 0,336136178  | -0,16428848 |  |
| 224907_s_at  | SH3GLB2          | 0,171847695  | 0,336136178  | -0,16428848 |  |
| 229955_at    | FBXO3            | 0,171847695  | 0,336136178  | -0,16428848 |  |
| 203409_at    | DDB2             | 1,709647566  | 1,874012195  | -0,16436463 |  |
| 219222_at    | RBKS             | 0,822971223  | 0,987376598  | -0,16440537 |  |
| 201903_at    | UQCRC1           | 5,176925917  | 5,341379601  | -0,16445368 |  |
| 225899_x_at  | FLJ45340 /// FLJ | 2,947914474  | 3,112391743  | -0,16447727 |  |
| 202519_at    | MLXIP            | 3,211467103  | 3,376085218  | -0,16461812 |  |
| 201693_s_at  | EGR1             | 2,043538949  | 2,208167653  | -0,1646287  |  |
| 227633_at    | RHEB             | 1,926486359  | 2,091116676  | -0,16463032 |  |
| 202222_s_at  | DES              | -0,136301282 | 0,028364014  | -0,1646653  |  |
| 207357_s_at  | GALNT10          | -0,136301282 | 0,028364014  | -0,1646653  |  |
| 202747_s_at  | ITM2A            | 3,659073863  | 3,823741953  | -0,16466809 |  |
| 1569934_at   | PREX2            | -3,342483913 | -3,177802286 | -0,16468163 |  |
| 230344_x_at  | -                | -3,342483913 | -3,177802286 | -0,16468163 |  |

|              |                |              |              |             |  |
|--------------|----------------|--------------|--------------|-------------|--|
| 233622_x_at  | -              | -3,342483913 | -3,177802286 | -0,16468163 |  |
| 234601_x_at  | -              | -3,342483913 | -3,177802286 | -0,16468163 |  |
| 219394_at    | PGS1           | 1,820612054  | 1,98530622   | -0,16469417 |  |
| 212740_at    | PIK3R4         | 3,307136232  | 3,471887144  | -0,16475091 |  |
| 204481_at    | BRPF1          | 1,390002893  | 1,55481039   | -0,1648075  |  |
| 205702_at    | PHTF1          | 1,390002893  | 1,55481039   | -0,1648075  |  |
| 1569796_s_at | ATRN1          | 2,114952142  | 2,27978304   | -0,1648309  |  |
| 201929_s_at  | PKP4           | 1,751865623  | 1,916759838  | -0,16489422 |  |
| 1569305_a_at | -              | -0,055687482 | 0,109221392  | -0,16490887 |  |
| 220765_s_at  | LIMS2          | -0,055687482 | 0,109221392  | -0,16490887 |  |
| 221753_at    | SSH1           | -0,055687482 | 0,109221392  | -0,16490887 |  |
| 236969_at    | -              | -0,055687482 | 0,109221392  | -0,16490887 |  |
| 241898_at    | LIPH           | -0,055687482 | 0,109221392  | -0,16490887 |  |
| 203096_s_at  | RAPGEF2        | 0,728550685  | 0,893473268  | -0,16492258 |  |
| 228037_at    | -              | 0,728550685  | 0,893473268  | -0,16492258 |  |
| 212216_at    | PREPL          | 2,705069849  | 2,869995113  | -0,16492526 |  |
| 201032_at    | BLCAP          | 4,100370717  | 4,265343974  | -0,16497326 |  |
| 57539_at     | ZGPAT          | 1,148825584  | 1,313817865  | -0,16499228 |  |
| 204223_at    | PRELP          | -0,655928373 | -0,490927335 | -0,16500104 |  |
| 205056_s_at  | GPR162         | -0,655928373 | -0,490927335 | -0,16500104 |  |
| 207397_s_at  | HOXD13         | -0,655928373 | -0,490927335 | -0,16500104 |  |
| 214458_at    | TRAF3IP1       | -0,655928373 | -0,490927335 | -0,16500104 |  |
| 221908_at    | RNFT2          | -0,655928373 | -0,490927335 | -0,16500104 |  |
| 224557_x_at  | P2RX2          | -0,655928373 | -0,490927335 | -0,16500104 |  |
| 229293_at    | -              | -0,655928373 | -0,490927335 | -0,16500104 |  |
| 233005_at    | ZNHIT6         | -0,655928373 | -0,490927335 | -0,16500104 |  |
| 239893_at    | -              | -0,655928373 | -0,490927335 | -0,16500104 |  |
| 242278_at    | -              | -0,655928373 | -0,490927335 | -0,16500104 |  |
| 212108_at    | FAF2           | 3,25727902   | 3,42231092   | -0,1650319  |  |
| 215711_s_at  | WEE1           | 2,402750389  | 2,567790814  | -0,16504042 |  |
| 219869_s_at  | SLC39A8        | 2,416948786  | 2,582026171  | -0,16507739 |  |
| 212241_at    | GCOM1 /// MYZA | 1,296557217  | 1,461646549  | -0,16508933 |  |
| 218619_s_at  | SUV39H1        | 2,327437554  | 2,492544876  | -0,16510732 |  |
| 223262_s_at  | FGFR1OP2       | 1,982112682  | 2,147243253  | -0,16513057 |  |
| 225077_at    | CHD2           | 1,982112682  | 2,147243253  | -0,16513057 |  |
| 1559766_at   | ALDH1L1-AS2    | -0,423248115 | -0,258114234 | -0,16513388 |  |
| 217472_at    | -              | -0,423248115 | -0,258114234 | -0,16513388 |  |
| 236290_at    | DOK6           | -0,423248115 | -0,258114234 | -0,16513388 |  |
| 244257_at    | -              | -0,423248115 | -0,258114234 | -0,16513388 |  |
| 235223_at    | -              | 1,880387527  | 2,045615873  | -0,16522835 |  |
| 225467_s_at  | RDH13          | 1,578645857  | 1,743944487  | -0,16529863 |  |
| 204495_s_at  | C15orf39       | 2,701760055  | 2,867091644  | -0,16533159 |  |
| 201989_s_at  | CREBL2         | 2,825526235  | 2,990953566  | -0,16542733 |  |
| 208726_s_at  | EIF2S2         | 6,39820713   | 6,563693755  | -0,16548663 |  |
| 201463_s_at  | TALDO1         | 5,675127914  | 5,840617083  | -0,16548917 |  |
| 212690_at    | DDHD2          | 1,67631007   | 1,841838775  | -0,1655287  |  |
| 218371_s_at  | PSPC1          | 1,67631007   | 1,841838775  | -0,1655287  |  |
| 241386_at    | LOC100506691   | 2,277177578  | 2,442710777  | -0,1655332  |  |
| 220966_x_at  | ARPC5L         | 3,943876123  | 4,109462531  | -0,16558641 |  |
| 1560854_s_at | ZNF107         | -0,325749314 | -0,160136748 | -0,16561257 |  |
| 214237_x_at  | PAWR           | -0,325749314 | -0,160136748 | -0,16561257 |  |
| 219887_at    | CCDC87         | -0,325749314 | -0,160136748 | -0,16561257 |  |
| 221031_s_at  | APOLD1         | -0,325749314 | -0,160136748 | -0,16561257 |  |
| 228832_at    | FLJ20021       | -0,325749314 | -0,160136748 | -0,16561257 |  |
| 230906_at    | GALNT10        | -0,325749314 | -0,160136748 | -0,16561257 |  |
| 237078_at    | -              | -0,325749314 | -0,160136748 | -0,16561257 |  |

|              |                 |              |              |             |  |
|--------------|-----------------|--------------|--------------|-------------|--|
| 240767_x_at  | VPS13A-AS1      | -0,325749314 | -0,160136748 | -0,16561257 |  |
| 1556316_s_at | LOC284889       | 0,228146222  | 0,393761504  | -0,16561528 |  |
| 209655_s_at  | TMEM47          | 0,228146222  | 0,393761504  | -0,16561528 |  |
| 231730_at    | SEPSECS         | 0,228146222  | 0,393761504  | -0,16561528 |  |
| 236316_at    | FAM3C           | 0,228146222  | 0,393761504  | -0,16561528 |  |
| 201023_at    | TAF7            | 4,905270836  | 5,070939787  | -0,16566895 |  |
| 204117_at    | PREP            | 3,18563636   | 3,351366359  | -0,16573    |  |
| 212128_s_at  | DAG1            | 0,291166226  | 0,456918297  | -0,16575207 |  |
| 235278_at    | MACROD2         | 0,767063567  | 0,932882274  | -0,16581871 |  |
| 1555062_s_at | GTPBP3          | 1,62481334   | 1,790660532  | -0,16584719 |  |
| 209142_s_at  | UBE2G1          | 3,811181587  | 3,977034308  | -0,16585272 |  |
| 208663_s_at  | TTC3 /// TTC3P1 | 3,313655555  | 3,479511525  | -0,16585597 |  |
| 239419_at    | PTPRA           | 0,351548291  | 0,51742585   | -0,16587756 |  |
| 1555753_x_at | ERVH-6          | -1,543331864 | -1,377419394 | -0,16591247 |  |
| 1556048_at   | LOC100507564    | -1,543331864 | -1,377419394 | -0,16591247 |  |
| 1557322_at   | ZNF230          | -1,543331864 | -1,377419394 | -0,16591247 |  |
| 1557369_a_at | LOC285401       | -1,543331864 | -1,377419394 | -0,16591247 |  |
| 1557738_at   | -               | -1,543331864 | -1,377419394 | -0,16591247 |  |
| 1557893_a_at | LOC100144597    | -1,543331864 | -1,377419394 | -0,16591247 |  |
| 1560346_at   | -               | -1,543331864 | -1,377419394 | -0,16591247 |  |
| 205319_at    | PSCA            | -1,543331864 | -1,377419394 | -0,16591247 |  |
| 207206_s_at  | ALOX12          | -1,543331864 | -1,377419394 | -0,16591247 |  |
| 207716_at    | KRT38           | -1,543331864 | -1,377419394 | -0,16591247 |  |
| 207924_x_at  | PAX8            | -1,543331864 | -1,377419394 | -0,16591247 |  |
| 208111_at    | AVPR2           | -1,543331864 | -1,377419394 | -0,16591247 |  |
| 221684_s_at  | NYX             | -1,543331864 | -1,377419394 | -0,16591247 |  |
| 224031_at    | -               | -1,543331864 | -1,377419394 | -0,16591247 |  |
| 224191_x_at  | ROPN1           | -1,543331864 | -1,377419394 | -0,16591247 |  |
| 230093_at    | RSPH1           | -1,543331864 | -1,377419394 | -0,16591247 |  |
| 237003_at    | BEST3           | -1,543331864 | -1,377419394 | -0,16591247 |  |
| 223284_at    | NAT14           | 1,46610492   | 1,632095957  | -0,16599104 |  |
| 208861_s_at  | ATRX            | 2,776027875  | 2,942125533  | -0,16609766 |  |
| 205905_s_at  | MICA /// MICB   | 2,436992838  | 2,603119255  | -0,16612642 |  |
| 223988_x_at  | METT17          | 4,859592153  | 5,025764514  | -0,16617236 |  |
| 209389_x_at  | DBI             | 5,215150897  | 5,38135477   | -0,16620387 |  |
| 227254_at    | POU2F1          | 1,011212064  | 1,177496821  | -0,16628476 |  |
| 1552947_x_at | ZNF114          | 0,57058931   | 0,73688026   | -0,16629095 |  |
| 203238_s_at  | NOTCH3          | 0,57058931   | 0,73688026   | -0,16629095 |  |
| 226926_at    | DMKN            | 0,57058931   | 0,73688026   | -0,16629095 |  |
| 231599_x_at  | DPF1            | 0,57058931   | 0,73688026   | -0,16629095 |  |
| 206993_at    | ATP5S           | 1,04816921   | 1,214517879  | -0,16634867 |  |
| 227331_at    | ZNF740          | 1,04816921   | 1,214517879  | -0,16634867 |  |
| 1556340_at   | MAPK12          | 1,406361373  | 1,572742379  | -0,16638101 |  |
| 218562_s_at  | TMEM57          | 1,406361373  | 1,572742379  | -0,16638101 |  |
| 226808_at    | ZNF862          | 1,406361373  | 1,572742379  | -0,16638101 |  |
| 209279_s_at  | NSDHL           | 1,912238072  | 2,078620836  | -0,16638276 |  |
| 244287_at    | SREK1           | 1,912238072  | 2,078620836  | -0,16638276 |  |
| 228281_at    | C11orf82        | 3,315822132  | 3,482360311  | -0,16653818 |  |
| 204780_s_at  | FAS             | 0,083054335  | 0,249604176  | -0,16654984 |  |
| 210582_s_at  | LIMK2           | 0,083054335  | 0,249604176  | -0,16654984 |  |
| 213692_s_at  | VDR             | 0,083054335  | 0,249604176  | -0,16654984 |  |
| 214755_at    | UAP1L1          | 0,083054335  | 0,249604176  | -0,16654984 |  |
| 217963_s_at  | NGFRAP1         | 6,316171708  | 6,482785229  | -0,16661352 |  |
| 229256_at    | PGM2L1          | 2,064305961  | 2,230931691  | -0,16662573 |  |
| 1556592_at   | -               | -3,013665402 | -2,847001814 | -0,16666359 |  |
| 1556783_a_at | -               | -3,013665402 | -2,847001814 | -0,16666359 |  |

|              |                 |              |              |             |  |
|--------------|-----------------|--------------|--------------|-------------|--|
| 1557545_s_at | RNF165          | -3,013665402 | -2,847001814 | -0,16666359 |  |
| 1557566_at   | LOC100507634    | -3,013665402 | -2,847001814 | -0,16666359 |  |
| 1559650_at   | JAZF1-AS1       | -3,013665402 | -2,847001814 | -0,16666359 |  |
| 1561882_at   | SYTL3           | -3,013665402 | -2,847001814 | -0,16666359 |  |
| 1563299_at   | -               | -3,013665402 | -2,847001814 | -0,16666359 |  |
| 1563827_at   | LOC158434       | -3,013665402 | -2,847001814 | -0,16666359 |  |
| 1567698_x_at | -               | -3,013665402 | -2,847001814 | -0,16666359 |  |
| 211476_at    | MYOZ2           | -3,013665402 | -2,847001814 | -0,16666359 |  |
| 216795_at    | -               | -3,013665402 | -2,847001814 | -0,16666359 |  |
| 222959_at    | CNGB3           | -3,013665402 | -2,847001814 | -0,16666359 |  |
| 223343_at    | MS4A7           | -3,013665402 | -2,847001814 | -0,16666359 |  |
| 234212_at    | ACTR2           | -3,013665402 | -2,847001814 | -0,16666359 |  |
| 236735_at    | -               | -3,013665402 | -2,847001814 | -0,16666359 |  |
| 244482_at    | -               | -3,013665402 | -2,847001814 | -0,16666359 |  |
| 214240_at    | GAL             | 4,41122478   | 4,577894064  | -0,16666928 |  |
| 208633_s_at  | MACF1           | 1,251994932  | 1,418668082  | -0,16667315 |  |
| 222516_at    | AP3M1           | 3,446146386  | 3,6128809    | -0,16673451 |  |
| 228810_at    | CCNYL1          | 0,888485433  | 1,055274826  | -0,16678939 |  |
| 235324_at    | SRSF3           | 0,888485433  | 1,055274826  | -0,16678939 |  |
| 239462_at    | ZNF284          | 2,185368281  | 2,352169913  | -0,16680163 |  |
| 225132_at    | FBXL3           | 3,38038663   | 3,547283438  | -0,16689681 |  |
| 218788_s_at  | SMYD3           | 3,416167722  | 3,583111417  | -0,16694369 |  |
| 205169_at    | RBBP5           | 2,097427503  | 2,264418116  | -0,16699061 |  |
| 1552524_at   | ART5            | 0,401366113  | 0,568365095  | -0,16699898 |  |
| 213076_at    | ITPKC           | 0,401366113  | 0,568365095  | -0,16699898 |  |
| 217095_x_at  | NCR1            | 0,401366113  | 0,568365095  | -0,16699898 |  |
| 228696_at    | SLC45A3         | 0,401366113  | 0,568365095  | -0,16699898 |  |
| 203169_at    | RGP1            | 0,457392764  | 0,624460759  | -0,16706799 |  |
| 217297_s_at  | MYO9B           | 0,457392764  | 0,624460759  | -0,16706799 |  |
| 1554253_a_at | CERS3           | -0,986356909 | -0,819238336 | -0,16711857 |  |
| 1557372_at   | ATP6V1E2 /// FL | -0,986356909 | -0,819238336 | -0,16711857 |  |
| 206280_at    | CDH18           | -0,986356909 | -0,819238336 | -0,16711857 |  |
| 210316_at    | FLT4            | -0,986356909 | -0,819238336 | -0,16711857 |  |
| 215734_at    | IZUMO4          | -0,986356909 | -0,819238336 | -0,16711857 |  |
| 222758_s_at  | TMEM132A        | -0,986356909 | -0,819238336 | -0,16711857 |  |
| 224134_at    | MGC10814        | -0,986356909 | -0,819238336 | -0,16711857 |  |
| 230455_at    | PPP1R9B         | -0,986356909 | -0,819238336 | -0,16711857 |  |
| 230839_at    | PRMT8           | -0,986356909 | -0,819238336 | -0,16711857 |  |
| 231206_at    | -               | -0,986356909 | -0,819238336 | -0,16711857 |  |
| 236975_at    | -               | -0,986356909 | -0,819238336 | -0,16711857 |  |
| 242421_at    | -               | -0,986356909 | -0,819238336 | -0,16711857 |  |
| 243987_at    | -               | -0,986356909 | -0,819238336 | -0,16711857 |  |
| 211065_x_at  | PFKL            | 3,105247586  | 3,272369332  | -0,16712175 |  |
| 211940_x_at  | H3F3A /// H3F3A | 6,801220726  | 6,968389063  | -0,16716834 |  |
| 1552711_a_at | CYB5D1          | 2,732900676  | 2,900133867  | -0,16723319 |  |
| 230449_x_at  | -               | 2,190100188  | 2,357351836  | -0,16725165 |  |
| 204249_s_at  | LMO2            | 5,659218655  | 5,82648707   | -0,16726842 |  |
| 224745_x_at  | OTUD5           | 2,600539826  | 2,767843855  | -0,16730403 |  |
| 223332_x_at  | RNF126          | 1,339784194  | 1,507116528  | -0,16733233 |  |
| 1552648_a_at | TNFRSF10A       | 1,534677255  | 1,702196344  | -0,16751909 |  |
| 223485_at    | HAGHL           | 0,962260738  | 1,129843209  | -0,16758247 |  |
| 229943_at    | TRIM13          | 1,000476627  | 1,16809119   | -0,16761456 |  |
| 239231_at    | -               | 2,452829957  | 2,620464265  | -0,16763431 |  |
| 202215_s_at  | NFYC            | 2,466546243  | 2,634191677  | -0,16764543 |  |
| 223010_s_at  | OCIAD1          | 4,613225966  | 4,780891495  | -0,16766553 |  |
| 202059_s_at  | KPNA1           | 3,000043914  | 3,16771226   | -0,16766835 |  |

|              |                |              |              |             |  |
|--------------|----------------|--------------|--------------|-------------|--|
| 212539_at    | CHD1L          | 3,812716554  | 3,980396806  | -0,16768025 |  |
| 59631_at     | TXNRD3 /// TXN | 0,634475463  | 0,802179114  | -0,16770365 |  |
| 204517_at    | PPIC           | 4,812419766  | 4,980136916  | -0,16771715 |  |
| 226561_at    | AGFG1          | 1,210676994  | 1,378453643  | -0,16777665 |  |
| 203605_at    | SRP54          | 4,911014665  | 5,078804007  | -0,16778934 |  |
| 212866_at    | R3HCC1         | 2,320980353  | 2,488772006  | -0,16779165 |  |
| 202082_s_at  | SEC14L1        | 1,274448124  | 1,442269454  | -0,16782133 |  |
| 235692_at    | SH3KBP1        | 1,274448124  | 1,442269454  | -0,16782133 |  |
| 201527_at    | ATP6V1F        | 5,624243949  | 5,792076019  | -0,16783207 |  |
| 222694_at    | LOC100287195 / | 1,394109935  | 1,562009954  | -0,16790002 |  |
| 203892_at    | WFDC2          | 0,209623097  | 0,377530647  | -0,16790755 |  |
| 230678_at    | RGS5           | 0,209623097  | 0,377530647  | -0,16790755 |  |
| 239070_at    | -              | 0,209623097  | 0,377530647  | -0,16790755 |  |
| 242763_at    | -              | 0,209623097  | 0,377530647  | -0,16790755 |  |
| 1553403_at   | RLN3           | -1,591296941 | -1,423348341 | -0,1679486  |  |
| 1556960_a_at | ANHX           | -1,591296941 | -1,423348341 | -0,1679486  |  |
| 1557410_at   | LOC100506606   | -1,591296941 | -1,423348341 | -0,1679486  |  |
| 1561916_at   | -              | -1,591296941 | -1,423348341 | -0,1679486  |  |
| 1562446_at   | ZNF391         | -1,591296941 | -1,423348341 | -0,1679486  |  |
| 1566853_at   | -              | -1,591296941 | -1,423348341 | -0,1679486  |  |
| 204192_at    | CD37           | -1,591296941 | -1,423348341 | -0,1679486  |  |
| 206264_at    | GPLD1          | -1,591296941 | -1,423348341 | -0,1679486  |  |
| 213752_at    | KAZN           | -1,591296941 | -1,423348341 | -0,1679486  |  |
| 215277_at    | PCDH1          | -1,591296941 | -1,423348341 | -0,1679486  |  |
| 222288_at    | -              | -1,591296941 | -1,423348341 | -0,1679486  |  |
| 230422_at    | FPR3           | -1,591296941 | -1,423348341 | -0,1679486  |  |
| 234925_at    | LOC732275      | -1,591296941 | -1,423348341 | -0,1679486  |  |
| 235377_at    | MLIP           | -1,591296941 | -1,423348341 | -0,1679486  |  |
| 236779_at    | MRPS5          | -1,591296941 | -1,423348341 | -0,1679486  |  |
| 237439_at    | USP43          | -1,591296941 | -1,423348341 | -0,1679486  |  |
| 237883_at    | -              | -1,591296941 | -1,423348341 | -0,1679486  |  |
| 239640_at    | LOC401320      | -1,591296941 | -1,423348341 | -0,1679486  |  |
| 239880_at    | LOC100505877   | -1,591296941 | -1,423348341 | -0,1679486  |  |
| 217817_at    | ARPC4          | 3,025418883  | 3,193438316  | -0,16801943 |  |
| 223421_at    | CYHR1          | 1,607231019  | 1,775255987  | -0,16802497 |  |
| 234972_at    | ARL16          | 1,607231019  | 1,775255987  | -0,16802497 |  |
| 233461_x_at  | ZNF226         | 2,348755185  | 2,516830926  | -0,16807574 |  |
| 207353_s_at  | HMX1           | 0,555999837  | 0,724100169  | -0,16810033 |  |
| 234471_s_at  | NCOA5          | 0,792179257  | 0,960386719  | -0,16820746 |  |
| 236116_at    | -              | 0,792179257  | 0,960386719  | -0,16820746 |  |
| 228641_at    | CARD8          | 2,122398022  | 2,290658654  | -0,16826063 |  |
| 1555758_a_at | CDKN3          | 4,091545995  | 4,259820154  | -0,16827416 |  |
| 218803_at    | CHFR           | 3,270743649  | 3,439026336  | -0,16828269 |  |
| 202235_at    | SLC16A1        | 2,254767157  | 2,423075926  | -0,16830877 |  |
| 209205_s_at  | LMO4           | 3,34687727   | 3,515187047  | -0,16830978 |  |
| 209281_s_at  | ATP2B1         | 1,104397092  | 1,272721751  | -0,16832466 |  |
| 1553703_at   | ZNF791         | 4,454147865  | 4,622479552  | -0,16833169 |  |
| 205391_x_at  | ANK1           | 1,473887017  | 1,642321262  | -0,16843425 |  |
| 241968_at    | C4orf29        | 1,81142822   | 1,979940779  | -0,16851256 |  |
| 213581_at    | PDCD2          | 3,90985831   | 4,078419261  | -0,16856095 |  |
| 226326_at    | PCGF5          | 2,220484971  | 2,389070873  | -0,1685859  |  |
| 226844_at    | MOB3B          | 2,589836943  | 2,758473378  | -0,16863643 |  |
| 223518_at    | DFFA           | 2,755423794  | 2,924079008  | -0,16865521 |  |
| 211939_x_at  | BTF3           | 6,86345556   | 7,032233076  | -0,16877752 |  |
| 232369_at    | -              | 2,637386731  | 2,806245339  | -0,16885861 |  |
| 210832_x_at  | PTGER3         | 1,672933557  | 1,841838775  | -0,16890522 |  |

|              |                  |              |              |             |  |
|--------------|------------------|--------------|--------------|-------------|--|
| 226687_at    | PRPF40A          | 1,575032557  | 1,743944487  | -0,16891193 |  |
| 210445_at    | FABP6            | 1,523472489  | 1,692388143  | -0,16891565 |  |
| 239784_at    | -                | 1,523472489  | 1,692388143  | -0,16891565 |  |
| 221763_at    | JMJD1C           | 1,496984567  | 1,665902186  | -0,16891762 |  |
| 229615_at    | -                | 1,496984567  | 1,665902186  | -0,16891762 |  |
| 210023_s_at  | PCGF1            | 1,201332287  | 1,370274469  | -0,16894218 |  |
| 214699_x_at  | WIPI2            | 0,87091093   | 1,039887232  | -0,1689763  |  |
| 218583_s_at  | DCUN1D1          | 4,151001694  | 4,319980141  | -0,16897845 |  |
| 229898_at    | SNX33            | 0,648296226  | 0,817300337  | -0,16900411 |  |
| 212793_at    | DAAM2            | 0,384950573  | 0,553993624  | -0,16904305 |  |
| 212952_at    | CALR             | 3,5222335    | 3,691304166  | -0,16907067 |  |
| 201956_s_at  | GNPAT            | 3,875018969  | 4,044124824  | -0,16910585 |  |
| 219489_s_at  | NXN              | 5,002628082  | 5,171741374  | -0,16911329 |  |
| 201951_at    | ALCAM            | -0,089689931 | 0,079428135  | -0,16911807 |  |
| 215043_s_at  | GUSBP3 /// GUS   | -0,089689931 | 0,079428135  | -0,16911807 |  |
| 231149_s_at  | ULK4             | -0,089689931 | 0,079428135  | -0,16911807 |  |
| 239215_at    | LOC100289495     | -0,089689931 | 0,079428135  | -0,16911807 |  |
| 203632_s_at  | GPRC5B           | 2,310153708  | 2,479296438  | -0,16914273 |  |
| 202840_at    | TAF15            | 3,664184451  | 3,833443169  | -0,16925872 |  |
| 226992_at    | NOSTRIN          | 3,182077878  | 3,351366359  | -0,16928848 |  |
| 214427_at    | NOP2             | 2,898174856  | 3,067567462  | -0,16939261 |  |
| 33767_at     | NEFH             | 6,204041788  | 6,373476792  | -0,169435   |  |
| 1555007_s_at | WDR66            | -2,504600601 | -2,335104118 | -0,16949648 |  |
| 1556798_a_at | RNF144A-AS1      | -2,504600601 | -2,335104118 | -0,16949648 |  |
| 1557557_at   | MATN1-AS1        | -2,504600601 | -2,335104118 | -0,16949648 |  |
| 1561078_at   | -                | -2,504600601 | -2,335104118 | -0,16949648 |  |
| 1561334_at   | LOC285181        | -2,504600601 | -2,335104118 | -0,16949648 |  |
| 1564212_at   | -                | -2,504600601 | -2,335104118 | -0,16949648 |  |
| 1568634_a_at | LRRC66           | -2,504600601 | -2,335104118 | -0,16949648 |  |
| 215572_at    | -                | -2,504600601 | -2,335104118 | -0,16949648 |  |
| 215742_at    | -                | -2,504600601 | -2,335104118 | -0,16949648 |  |
| 217015_at    | -                | -2,504600601 | -2,335104118 | -0,16949648 |  |
| 218035_s_at  | RBM47            | -2,504600601 | -2,335104118 | -0,16949648 |  |
| 220005_at    | P2RY13           | -2,504600601 | -2,335104118 | -0,16949648 |  |
| 220487_at    | SNTG2            | -2,504600601 | -2,335104118 | -0,16949648 |  |
| 224112_at    | -                | -2,504600601 | -2,335104118 | -0,16949648 |  |
| 224274_at    | FSCB             | -2,504600601 | -2,335104118 | -0,16949648 |  |
| 227794_at    | GLYATL1 /// LOC  | -2,504600601 | -2,335104118 | -0,16949648 |  |
| 230051_at    | C10orf47         | -2,504600601 | -2,335104118 | -0,16949648 |  |
| 231733_at    | CARD18           | -2,504600601 | -2,335104118 | -0,16949648 |  |
| 232585_at    | TLK2             | -2,504600601 | -2,335104118 | -0,16949648 |  |
| 234184_at    | -                | -2,504600601 | -2,335104118 | -0,16949648 |  |
| 236633_at    | GTPBP10          | -2,504600601 | -2,335104118 | -0,16949648 |  |
| 239120_at    | C1orf126         | -2,504600601 | -2,335104118 | -0,16949648 |  |
| 239461_at    | GALNTL2          | -2,504600601 | -2,335104118 | -0,16949648 |  |
| 241790_at    | -                | -2,504600601 | -2,335104118 | -0,16949648 |  |
| 242452_at    | -                | -2,504600601 | -2,335104118 | -0,16949648 |  |
| 244076_at    | KIAA2022         | -2,504600601 | -2,335104118 | -0,16949648 |  |
| 214011_s_at  | NOP16            | 5,500654182  | 5,670154834  | -0,16950065 |  |
| 202399_s_at  | AP3S2 /// C15orf | 2,994644467  | 3,164168347  | -0,16952388 |  |
| 212420_at    | ELF1             | 3,606946883  | 3,77655538   | -0,1696085  |  |
| 218137_s_at  | SMAP1            | 4,467851686  | 4,637466396  | -0,16961471 |  |
| 208316_s_at  | OCRL             | 0,984222186  | 1,153866761  | -0,16964458 |  |
| 237618_at    | -                | 0,984222186  | 1,153866761  | -0,16964458 |  |
| 200932_s_at  | DCTN2            | 4,28697245   | 4,456625687  | -0,16965324 |  |
| 218916_at    | ZNF768           | 0,945567441  | 1,115234684  | -0,16966724 |  |

|              |                 |              |              |             |  |
|--------------|-----------------|--------------|--------------|-------------|--|
| 38671_at     | PLXND1          | 3,102112719  | 3,27182058   | -0,16970786 |  |
| 238575_at    | OSBPL6          | 2,915422315  | 3,08516499   | -0,16974268 |  |
| 210026_s_at  | CARD10          | 0,779676066  | 0,949447784  | -0,16977172 |  |
| 219725_at    | TREM2           | 0,735041319  | 0,904843258  | -0,16980194 |  |
| 221078_s_at  | CCDC88A         | 0,735041319  | 0,904843258  | -0,16980194 |  |
| 242844_at    | PGGT1B          | 0,735041319  | 0,904843258  | -0,16980194 |  |
| 226630_at    | MIS18BP1        | 3,617524043  | 3,787346121  | -0,16982208 |  |
| 1568704_a_at | CHERP           | 2,05655332   | 2,226407528  | -0,16985421 |  |
| 212872_s_at  | MED20           | 4,042675065  | 4,212565608  | -0,16989054 |  |
| 212022_s_at  | MKI67           | 2,923969333  | 3,09388391   | -0,16991458 |  |
| 202772_at    | HMGCL           | 2,303618506  | 2,473581079  | -0,16996257 |  |
| 202576_s_at  | DDX19A /// DDX1 | 3,000043914  | 3,170070041  | -0,17002613 |  |
| 220155_s_at  | BRD9            | 2,732900676  | 2,902971658  | -0,17007098 |  |
| 221227_x_at  | COQ3            | 2,721505869  | 2,891586849  | -0,17008098 |  |
| 225775_at    | TSPAN33         | 1,709647566  | 1,879785595  | -0,17013803 |  |
| 228852_at    | ENSA            | 2,331726354  | 2,501934108  | -0,17020775 |  |
| 214241_at    | NDUFB8          | 1,05337236   | 1,223626587  | -0,17025423 |  |
| 222108_at    | AMIGO2          | 2,890927111  | 3,061230246  | -0,17030314 |  |
| 227808_at    | DNAJC15         | 0,123193849  | 0,293518836  | -0,17032499 |  |
| 203966_s_at  | PPM1A           | 3,551027544  | 3,721356767  | -0,17032922 |  |
| 200664_s_at  | DNAJB1          | 4,531690287  | 4,702026839  | -0,17033655 |  |
| 1555267_at   | GRID1           | 0,052199481  | 0,222599095  | -0,17039961 |  |
| 212169_at    | FKBP9           | 0,052199481  | 0,222599095  | -0,17039961 |  |
| 217710_x_at  | ITPK1           | 0,052199481  | 0,222599095  | -0,17039961 |  |
| 214789_x_at  | SRSF8           | 4,518111985  | 4,688521708  | -0,17040972 |  |
| 206704_at    | CLCN5           | 0,859074518  | 1,029536893  | -0,17046237 |  |
| 212116_at    | TRIM27          | 4,233538894  | 4,404011141  | -0,17047225 |  |
| 210249_s_at  | NCOA1           | 1,751865623  | 1,922365006  | -0,17049938 |  |
| 208842_s_at  | GORASP2         | 4,108517049  | 4,279061697  | -0,17054465 |  |
| 215509_s_at  | BUB1            | 2,967339888  | 3,137910193  | -0,1705703  |  |
| 1557938_s_at | PTRF            | -0,366776884 | -0,19610998  | -0,1706669  |  |
| 1569496_s_at | LOC100130872    | -0,366776884 | -0,19610998  | -0,1706669  |  |
| 211498_s_at  | NKX3-1          | -0,366776884 | -0,19610998  | -0,1706669  |  |
| 215760_s_at  | SBNO2           | -0,366776884 | -0,19610998  | -0,1706669  |  |
| 220108_at    | GNA14           | -0,366776884 | -0,19610998  | -0,1706669  |  |
| 233895_at    | ANKRD24         | -0,366776884 | -0,19610998  | -0,1706669  |  |
| 237568_at    | -               | -0,366776884 | -0,19610998  | -0,1706669  |  |
| 238676_at    | -               | -0,366776884 | -0,19610998  | -0,1706669  |  |
| 242260_at    | MATR3           | -0,366776884 | -0,19610998  | -0,1706669  |  |
| 212219_at    | PSME4           | 4,004232272  | 4,174906896  | -0,17067462 |  |
| 227368_at    | -               | 2,327437554  | 2,498185745  | -0,17074819 |  |
| 1553439_at   | -               | -1,026571149 | -0,855751026 | -0,17082012 |  |
| 1554657_a_at | C20orf26        | -1,026571149 | -0,855751026 | -0,17082012 |  |
| 215534_at    | -               | -1,026571149 | -0,855751026 | -0,17082012 |  |
| 215854_at    | -               | -1,026571149 | -0,855751026 | -0,17082012 |  |
| 217708_x_at  | -               | -1,026571149 | -0,855751026 | -0,17082012 |  |
| 231401_s_at  | -               | -1,026571149 | -0,855751026 | -0,17082012 |  |
| 238691_at    | SNHG10          | -1,026571149 | -0,855751026 | -0,17082012 |  |
| 240981_at    | -               | -1,026571149 | -0,855751026 | -0,17082012 |  |
| 244442_at    | HORMAD2         | -1,026571149 | -0,855751026 | -0,17082012 |  |
| 205370_x_at  | DBT             | 4,057640418  | 4,228489721  | -0,1708493  |  |
| 1566182_at   | -               | -0,706943342 | -0,536087151 | -0,17085619 |  |
| 214203_s_at  | PRODH           | -0,706943342 | -0,536087151 | -0,17085619 |  |
| 232230_at    | LINC00263       | -0,706943342 | -0,536087151 | -0,17085619 |  |
| 232732_at    | LOC100652999 /  | -0,706943342 | -0,536087151 | -0,17085619 |  |
| 234890_at    | LOC100288175    | -0,706943342 | -0,536087151 | -0,17085619 |  |



|              |                 |              |              |             |  |
|--------------|-----------------|--------------|--------------|-------------|--|
| 234916_at    | DBH             | -0,706943342 | -0,536087151 | -0,17085619 |  |
| 239988_at    | -               | -0,706943342 | -0,536087151 | -0,17085619 |  |
| 219596_at    | THAP10          | 2,030406107  | 2,201267805  | -0,1708617  |  |
| 214744_s_at  | RPL23           | 1,454352496  | 1,6252386    | -0,1708861  |  |
| 227512_at    | MEX3A           | 0,97328325   | 1,144305291  | -0,17102204 |  |
| 229067_at    | SRGAP2P1        | 1,894952274  | 2,066015817  | -0,17106354 |  |
| 1552494_at   | TAF8            | -0,85085127  | -0,679763839 | -0,17108743 |  |
| 1554231_a_at | ZNF396          | -0,85085127  | -0,679763839 | -0,17108743 |  |
| 206398_s_at  | CD19            | -0,85085127  | -0,679763839 | -0,17108743 |  |
| 214568_at    | TPSD1           | -0,85085127  | -0,679763839 | -0,17108743 |  |
| 216139_s_at  | MAPK8IP3        | -0,85085127  | -0,679763839 | -0,17108743 |  |
| 216816_at    | -               | -0,85085127  | -0,679763839 | -0,17108743 |  |
| 227015_at    | ASPHD2          | -0,85085127  | -0,679763839 | -0,17108743 |  |
| 230553_at    | PRDM15          | -0,85085127  | -0,679763839 | -0,17108743 |  |
| 231377_at    | CXorf65         | -0,85085127  | -0,679763839 | -0,17108743 |  |
| 235660_at    | -               | -0,85085127  | -0,679763839 | -0,17108743 |  |
| 237172_at    | -               | -0,85085127  | -0,679763839 | -0,17108743 |  |
| 208974_x_at  | KPNB1           | 5,469123995  | 5,640280705  | -0,17115671 |  |
| 218993_at    | RNMTL1          | 3,028064153  | 3,199221717  | -0,17115756 |  |
| 226949_at    | GOLGA3          | 1,247462054  | 1,418668082  | -0,17120603 |  |
| 242070_at    | LOC728485       | 4,816633389  | 4,987842433  | -0,17120904 |  |
| 200856_x_at  | NCOR1           | 0,30867765   | 0,479907041  | -0,17122939 |  |
| 211815_s_at  | GGA3            | 0,30867765   | 0,479907041  | -0,17122939 |  |
| 238184_at    | -               | 0,30867765   | 0,479907041  | -0,17122939 |  |
| 244871_s_at  | USP32           | 0,30867765   | 0,479907041  | -0,17122939 |  |
| 1557586_s_at | ATP6V1H         | 0,246434561  | 0,417770464  | -0,1713359  |  |
| 201629_s_at  | ACP1            | 4,523746101  | 4,69508544   | -0,17133934 |  |
| 230851_x_at  | C16orf13        | 0,181384709  | 0,352836757  | -0,17145205 |  |
| 231226_at    | -               | 0,181384709  | 0,352836757  | -0,17145205 |  |
| 216855_s_at  | HNRNPU          | 0,67554678   | 0,847075464  | -0,17152868 |  |
| 225347_at    | ARL8A           | 0,67554678   | 0,847075464  | -0,17152868 |  |
| 224692_at    | PPP1R15B        | 3,298397722  | 3,469974737  | -0,17157702 |  |
| 231992_x_at  | -               | 2,16388051   | 2,335461563  | -0,17158105 |  |
| 227077_at    | ZNF286A /// ZNF | 3,69780007   | 3,869433939  | -0,17163387 |  |
| 212430_at    | RBM38           | 3,179700672  | 3,351366359  | -0,17166569 |  |
| 219072_at    | BCL7C           | 2,626954721  | 2,798646381  | -0,17169166 |  |
| 1559302_at   | KIAA1467        | -1,2845686   | -1,112851844 | -0,17171676 |  |
| 205338_s_at  | DCT             | -1,2845686   | -1,112851844 | -0,17171676 |  |
| 205731_s_at  | NCOA2           | -1,2845686   | -1,112851844 | -0,17171676 |  |
| 207531_at    | CRYGC           | -1,2845686   | -1,112851844 | -0,17171676 |  |
| 210475_at    | POU3F1          | -1,2845686   | -1,112851844 | -0,17171676 |  |
| 221910_at    | ETV1            | -1,2845686   | -1,112851844 | -0,17171676 |  |
| 222450_at    | PMEPA1          | -1,2845686   | -1,112851844 | -0,17171676 |  |
| 223723_at    | MFI2            | -1,2845686   | -1,112851844 | -0,17171676 |  |
| 231801_at    | NFATC2          | -1,2845686   | -1,112851844 | -0,17171676 |  |
| 234395_at    | -               | -1,2845686   | -1,112851844 | -0,17171676 |  |
| 238837_at    | PHF8            | -1,2845686   | -1,112851844 | -0,17171676 |  |
| 239632_at    | -               | -1,2845686   | -1,112851844 | -0,17171676 |  |
| 241894_at    | VMO1            | -1,2845686   | -1,112851844 | -0,17171676 |  |
| 244113_at    | KCNJ9           | -1,2845686   | -1,112851844 | -0,17171676 |  |
| 220495_s_at  | TXNDC15         | 2,889473182  | 3,061230246  | -0,17175706 |  |
| 218794_s_at  | TXNL4B          | 2,194816625  | 2,366632651  | -0,17181603 |  |
| 228242_at    | N4BP2           | 2,938102794  | 3,109937707  | -0,17183491 |  |
| 201886_at    | DCAF11          | 1,868628927  | 2,040470494  | -0,17184157 |  |
| 201274_at    | PSMA5           | 5,537092123  | 5,708980862  | -0,17188874 |  |
| 234875_at    | -               | 2,525769574  | 2,697670403  | -0,17190083 |  |

|              |              |              |              |             |  |
|--------------|--------------|--------------|--------------|-------------|--|
| 823_at       | CX3CL1       | -1,410456665 | -1,238519522 | -0,17193714 |  |
| 243493_at    | -            | -0,59053611  | -0,41858459  | -0,17195152 |  |
| 243569_at    | TMEM174      | -0,59053611  | -0,41858459  | -0,17195152 |  |
| 204592_at    | DLG4         | -0,112808516 | 0,059218869  | -0,17202738 |  |
| 230611_at    | SYPL2        | -0,112808516 | 0,059218869  | -0,17202738 |  |
| 234226_at    | OPN4         | -0,112808516 | 0,059218869  | -0,17202738 |  |
| 235437_at    | -            | -0,112808516 | 0,059218869  | -0,17202738 |  |
| 235967_at    | LOC100127891 | -0,112808516 | 0,059218869  | -0,17202738 |  |
| 237023_at    | -            | -0,112808516 | 0,059218869  | -0,17202738 |  |
| 1556445_at   | -            | 0,417596971  | 0,589657387  | -0,17206042 |  |
| 215819_s_at  | RHCE /// RHD | 0,417596971  | 0,589657387  | -0,17206042 |  |
| 229031_at    | -            | 0,417596971  | 0,589657387  | -0,17206042 |  |
| 218374_s_at  | C12orf4      | 1,926486359  | 2,098562556  | -0,1720762  |  |
| 1566885_at   | -            | -0,196756757 | -0,024572586 | -0,17218417 |  |
| 1569154_a_at | -            | -0,196756757 | -0,024572586 | -0,17218417 |  |
| 206523_at    | CYTH3        | -0,196756757 | -0,024572586 | -0,17218417 |  |
| 216143_at    | -            | -0,196756757 | -0,024572586 | -0,17218417 |  |
| 227152_at    | C12orf35     | -0,196756757 | -0,024572586 | -0,17218417 |  |
| 233938_at    | C11orf86     | -0,196756757 | -0,024572586 | -0,17218417 |  |
| 212655_at    | ZCCHC14      | 2,159061673  | 2,331254065  | -0,17219239 |  |
| 213368_x_at  | PPFIA3       | 1,269985355  | 1,442269454  | -0,1722841  |  |
| 227505_at    | -            | 1,269985355  | 1,442269454  | -0,1722841  |  |
| 240616_at    | -            | 1,269985355  | 1,442269454  | -0,1722841  |  |
| 222718_at    | TMEM8A       | 1,982112682  | 2,154405725  | -0,17229304 |  |
| 201690_s_at  | TPD52        | 2,456762221  | 2,629059192  | -0,17229697 |  |
| 1553355_at   | -            | -1,71423189  | -1,541908042 | -0,17232385 |  |
| 1557452_at   | -            | -1,71423189  | -1,541908042 | -0,17232385 |  |
| 1560576_at   | -            | -1,71423189  | -1,541908042 | -0,17232385 |  |
| 1566424_at   | -            | -1,71423189  | -1,541908042 | -0,17232385 |  |
| 205594_at    | ZNF652       | -1,71423189  | -1,541908042 | -0,17232385 |  |
| 207448_at    | POFUT2       | -1,71423189  | -1,541908042 | -0,17232385 |  |
| 207451_at    | NKX2-8       | -1,71423189  | -1,541908042 | -0,17232385 |  |
| 208005_at    | NTN1         | -1,71423189  | -1,541908042 | -0,17232385 |  |
| 220222_at    | RBM12B-AS1   | -1,71423189  | -1,541908042 | -0,17232385 |  |
| 230392_at    | -            | -1,71423189  | -1,541908042 | -0,17232385 |  |
| 231488_at    | OTP          | -1,71423189  | -1,541908042 | -0,17232385 |  |
| 234444_at    | -            | -1,71423189  | -1,541908042 | -0,17232385 |  |
| 235859_at    | MLL3         | -1,71423189  | -1,541908042 | -0,17232385 |  |
| 237280_at    | TCTE1        | -1,71423189  | -1,541908042 | -0,17232385 |  |
| 238638_at    | SLC37A2      | -1,71423189  | -1,541908042 | -0,17232385 |  |
| 239868_at    | -            | -1,71423189  | -1,541908042 | -0,17232385 |  |
| 241159_x_at  | -            | -1,71423189  | -1,541908042 | -0,17232385 |  |
| 242100_at    | CHSY3        | -1,71423189  | -1,541908042 | -0,17232385 |  |
| 242504_at    | -            | -1,71423189  | -1,541908042 | -0,17232385 |  |
| 243397_at    | -            | -1,71423189  | -1,541908042 | -0,17232385 |  |
| 211934_x_at  | GANAB        | 3,572931593  | 3,745272377  | -0,17234078 |  |
| 1554317_s_at | TRMT61A      | 1,238353345  | 1,410714371  | -0,17236103 |  |
| 205784_x_at  | ARVCF        | 1,238353345  | 1,410714371  | -0,17236103 |  |
| 213288_at    | MBOAT2       | 1,442503549  | 1,614891062  | -0,17238751 |  |
| 48106_at     | SLC48A1      | 1,933558079  | 2,105970205  | -0,17241213 |  |
| 213113_s_at  | SLC43A3      | 4,276442889  | 4,448879066  | -0,17243618 |  |
| 213894_at    | THSD7A       | 1,758252436  | 1,930732138  | -0,1724797  |  |
| 201314_at    | STK25        | 2,035673598  | 2,208167653  | -0,17249405 |  |
| 218074_at    | FAM96B       | 4,814336575  | 4,986839697  | -0,17250312 |  |
| 203337_x_at  | ITGB1BP1     | 2,017152618  | 2,189694216  | -0,1725416  |  |
| 200920_s_at  | BTG1         | 3,034656185  | 3,207279726  | -0,17262354 |  |

|              |                 |              |              |             |  |
|--------------|-----------------|--------------|--------------|-------------|--|
| 214129_at    | LOC728802 /// P | 0,882651021  | 1,055274826  | -0,17262381 |  |
| 226893_at    | ABL2            | 2,582657321  | 2,755336312  | -0,17267899 |  |
| 222584_at    | MSTO1           | 2,069451339  | 2,242180416  | -0,17272908 |  |
| 212290_at    | SLC7A1          | 1,493160564  | 1,665902186  | -0,17274162 |  |
| 227020_at    | YPEL2           | 1,493160564  | 1,665902186  | -0,17274162 |  |
| 244802_at    | -               | 4,069245099  | 4,242000447  | -0,17275535 |  |
| 1553227_s_at | BRWD1           | 0,518867317  | 0,691645685  | -0,17277837 |  |
| 222913_at    | KLF3            | 0,518867317  | 0,691645685  | -0,17277837 |  |
| 227005_at    | RPP14           | 2,266015882  | 2,438805127  | -0,17278924 |  |
| 217754_at    | DDX56           | 2,700102307  | 2,87289275   | -0,17279044 |  |
| 211548_s_at  | HPGD            | 3,170152481  | 3,343031718  | -0,17287924 |  |
| 201673_s_at  | GYS1            | 1,880387527  | 2,053299695  | -0,17291217 |  |
| 206510_at    | SIX2            | 1,859746653  | 2,032717854  | -0,1729712  |  |
| 1552390_a_at | C8orf47         | -2,908843709 | -2,735862426 | -0,17298128 |  |
| 1552791_a_at | TRDN            | -2,908843709 | -2,735862426 | -0,17298128 |  |
| 1560614_at   | -               | -2,908843709 | -2,735862426 | -0,17298128 |  |
| 1561692_at   | -               | -2,908843709 | -2,735862426 | -0,17298128 |  |
| 1561703_at   | -               | -2,908843709 | -2,735862426 | -0,17298128 |  |
| 206202_at    | MEOX2           | -2,908843709 | -2,735862426 | -0,17298128 |  |
| 222246_at    | -               | -2,908843709 | -2,735862426 | -0,17298128 |  |
| 231800_s_at  | DMRT3           | -2,908843709 | -2,735862426 | -0,17298128 |  |
| 235795_at    | PAX6            | -2,908843709 | -2,735862426 | -0,17298128 |  |
| 236517_at    | MEGF10          | -2,908843709 | -2,735862426 | -0,17298128 |  |
| 238175_at    | -               | -2,908843709 | -2,735862426 | -0,17298128 |  |
| 238305_at    | -               | -2,908843709 | -2,735862426 | -0,17298128 |  |
| 240829_at    | -               | -2,908843709 | -2,735862426 | -0,17298128 |  |
| 241136_at    | -               | -2,908843709 | -2,735862426 | -0,17298128 |  |
| 241335_at    | -               | -2,908843709 | -2,735862426 | -0,17298128 |  |
| 244315_at    | PLSCR1          | -2,908843709 | -2,735862426 | -0,17298128 |  |
| 201089_at    | ATP6V1B2        | 4,740452408  | 4,913450933  | -0,17299853 |  |
| 209201_x_at  | CXCR4           | 0,995078803  | 1,16809119   | -0,17301239 |  |
| 238032_at    | -               | 0,995078803  | 1,16809119   | -0,17301239 |  |
| 238468_at    | TNRC6B          | 0,995078803  | 1,16809119   | -0,17301239 |  |
| 203022_at    | RNASEH2A        | 3,854300588  | 4,027317343  | -0,17301675 |  |
| 1566268_at   | -               | 0,03125738   | 0,204310755  | -0,17305338 |  |
| 214482_at    | ZBTB25          | 0,03125738   | 0,204310755  | -0,17305338 |  |
| 227940_at    | LOC339803       | 0,03125738   | 0,204310755  | -0,17305338 |  |
| 202676_x_at  | FASTK           | 2,879254447  | 3,052311115  | -0,17305667 |  |
| 222250_s_at  | INTS7           | 2,994644467  | 3,16771226   | -0,17306779 |  |
| 202093_s_at  | PAF1            | 2,807162789  | 2,980244813  | -0,17308202 |  |
| 202814_s_at  | HEXIM1          | 2,868962815  | 3,042049843  | -0,17308703 |  |
| 201199_s_at  | PSMD1           | 5,240463127  | 5,413551407  | -0,17308828 |  |
| 218826_at    | SLC35F2         | 2,516380342  | 2,689475799  | -0,17309546 |  |
| 1552745_at   | SLCO6A1         | -2,384869671 | -2,211750327 | -0,17311934 |  |
| 1552852_a_at | ZSCAN4          | -2,384869671 | -2,211750327 | -0,17311934 |  |
| 1557852_at   | -               | -2,384869671 | -2,211750327 | -0,17311934 |  |
| 1560298_at   | -               | -2,384869671 | -2,211750327 | -0,17311934 |  |
| 1561625_at   | -               | -2,384869671 | -2,211750327 | -0,17311934 |  |
| 1563584_at   | PIEZO2          | -2,384869671 | -2,211750327 | -0,17311934 |  |
| 1566748_at   | -               | -2,384869671 | -2,211750327 | -0,17311934 |  |
| 1570032_at   | AP3B2           | -2,384869671 | -2,211750327 | -0,17311934 |  |
| 207926_at    | GP5             | -2,384869671 | -2,211750327 | -0,17311934 |  |
| 208096_s_at  | COL21A1         | -2,384869671 | -2,211750327 | -0,17311934 |  |
| 211127_x_at  | EDA             | -2,384869671 | -2,211750327 | -0,17311934 |  |
| 220781_at    | 01.12.15        | -2,384869671 | -2,211750327 | -0,17311934 |  |
| 222383_s_at  | ALOXE3          | -2,384869671 | -2,211750327 | -0,17311934 |  |

|             |                |              |              |             |  |
|-------------|----------------|--------------|--------------|-------------|--|
| 224325_at   | FZD8           | -2,384869671 | -2,211750327 | -0,17311934 |  |
| 224999_at   | EGFR           | -2,384869671 | -2,211750327 | -0,17311934 |  |
| 231223_at   | CSMD1          | -2,384869671 | -2,211750327 | -0,17311934 |  |
| 231646_at   | DPCR1          | -2,384869671 | -2,211750327 | -0,17311934 |  |
| 232725_s_at | MS4A6A         | -2,384869671 | -2,211750327 | -0,17311934 |  |
| 234083_at   | -              | -2,384869671 | -2,211750327 | -0,17311934 |  |
| 236443_at   | -              | -2,384869671 | -2,211750327 | -0,17311934 |  |
| 236919_at   | -              | -2,384869671 | -2,211750327 | -0,17311934 |  |
| 239114_at   | -              | -2,384869671 | -2,211750327 | -0,17311934 |  |
| 239543_s_at | -              | -2,384869671 | -2,211750327 | -0,17311934 |  |
| 240578_at   | LOC100507531   | -2,384869671 | -2,211750327 | -0,17311934 |  |
| 240681_at   | -              | -2,384869671 | -2,211750327 | -0,17311934 |  |
| 241297_at   | -              | -2,384869671 | -2,211750327 | -0,17311934 |  |
| 242020_s_at | ZBP1           | -2,384869671 | -2,211750327 | -0,17311934 |  |
| 223237_x_at | AP2A1          | 0,95671774   | 1,129843209  | -0,17312547 |  |
| 219992_at   | TAC3           | 1,897847661  | 2,071071048  | -0,17322339 |  |
| 201970_s_at | NASP           | 5,528010153  | 5,701258043  | -0,17324789 |  |
| 239657_x_at | -              | 0,661985843  | 0,835239052  | -0,17325321 |  |
| 205153_s_at | CD40           | 1,973904239  | 2,147243253  | -0,17333901 |  |
| 232058_at   | -              | 2,064305961  | 2,237691445  | -0,17338548 |  |
| 202147_s_at | IFRD1          | 3,98734086   | 4,160749839  | -0,17340898 |  |
| 214718_at   | GATAD1         | 1,706348269  | 1,879785595  | -0,17343733 |  |
| 216384_x_at | LOC100506248 / | 6,087537978  | 6,261020454  | -0,17348248 |  |
| 229374_at   | EPHA4          | 1,406361373  | 1,579853228  | -0,17349186 |  |
| 218100_s_at | IFT57          | 3,290707863  | 3,464222256  | -0,17351439 |  |
| 208998_at   | UCP2           | 4,349114236  | 4,522690941  | -0,1735767  |  |
| 202295_s_at | CTSH           | 4,114129991  | 4,287773079  | -0,17364309 |  |
| 208660_at   | CS             | 5,094775253  | 5,268435324  | -0,17366007 |  |
| 227856_at   | C4orf32        | 3,647078281  | 3,820743792  | -0,17366551 |  |
| 221094_s_at | ELP3           | 1,726031811  | 1,899812471  | -0,17378066 |  |
| 208626_s_at | VAT1           | 3,731461974  | 3,905256463  | -0,17379449 |  |
| 235448_at   | ZXDC           | 0,747935635  | 0,921731975  | -0,17379634 |  |
| 243318_at   | DCAF8          | 1,129248302  | 1,303116084  | -0,17386778 |  |
| 225483_at   | VPS26B         | 1,81142822   | 1,98530622   | -0,173878   |  |
| 213237_at   | C16orf88       | 2,852640442  | 3,026519779  | -0,17387934 |  |
| 205086_s_at | NCAPH2         | 1,560488174  | 1,73441697   | -0,1739288  |  |
| 212159_x_at | AP2A2          | 2,402750389  | 2,576704359  | -0,17395397 |  |
| 1558546_at  | DNASE1         | 0,702292136  | 0,876248481  | -0,17395634 |  |
| 201871_s_at | UBXN1          | 3,202127528  | 3,376085218  | -0,17395769 |  |
| 1552503_at  | FRAS1          | -0,496991414 | -0,322870281 | -0,17412113 |  |
| 201189_s_at | ITPR3          | -0,496991414 | -0,322870281 | -0,17412113 |  |
| 218054_s_at | KXD1           | -0,496991414 | -0,322870281 | -0,17412113 |  |
| 228647_at   | LOC100049716   | -0,496991414 | -0,322870281 | -0,17412113 |  |
| 231375_at   | -              | -0,496991414 | -0,322870281 | -0,17412113 |  |
| 232205_at   | -              | -0,496991414 | -0,322870281 | -0,17412113 |  |
| 240763_at   | LOC100506853   | -0,496991414 | -0,322870281 | -0,17412113 |  |
| 243752_s_at | CYTH3          | -0,496991414 | -0,322870281 | -0,17412113 |  |
| 1553761_at  | PRR14L         | -0,394749123 | -0,220592223 | -0,1741569  |  |
| 214136_at   | NUDT13         | -0,394749123 | -0,220592223 | -0,1741569  |  |
| 241836_x_at | CEP97          | -0,394749123 | -0,220592223 | -0,1741569  |  |
| 241945_at   | -              | -0,394749123 | -0,220592223 | -0,1741569  |  |
| 242314_at   | TNRC6C         | -0,394749123 | -0,220592223 | -0,1741569  |  |
| 242990_at   | -              | -0,394749123 | -0,220592223 | -0,1741569  |  |
| 225418_at   | PVRL2          | 2,314494121  | 2,488772006  | -0,17427789 |  |
| 218615_s_at | TMEM39A        | 1,699726954  | 1,874012195  | -0,17428524 |  |
| 229758_at   | TIGD5          | 1,314003737  | 1,488344553  | -0,17434082 |  |

|              |                 |              |              |             |  |
|--------------|-----------------|--------------|--------------|-------------|--|
| 203709_at    | PHKG2           | 2,038300149  | 2,212749286  | -0,17444914 |  |
| 205055_at    | ITGAE           | 4,374280229  | 4,548745669  | -0,17446544 |  |
| 200992_at    | IPO7            | 4,153426622  | 4,327920804  | -0,17449418 |  |
| 207610_s_at  | EMR2            | 3,312571045  | 3,487095824  | -0,17452478 |  |
| 225251_at    | RAB24           | 2,369762403  | 2,544354523  | -0,17459212 |  |
| 234731_at    | -               | 2,945117939  | 3,119728903  | -0,17461096 |  |
| 230532_at    | CXorf38         | 1,369290453  | 1,543943227  | -0,17465277 |  |
| 1554296_at   | CYP19A1         | -3,212234735 | -3,037500868 | -0,17473387 |  |
| 1555601_at   | -               | -3,212234735 | -3,037500868 | -0,17473387 |  |
| 1562079_at   | -               | -3,212234735 | -3,037500868 | -0,17473387 |  |
| 1563016_at   | -               | -3,212234735 | -3,037500868 | -0,17473387 |  |
| 1563160_at   | F11             | -3,212234735 | -3,037500868 | -0,17473387 |  |
| 1564909_at   | -               | -3,212234735 | -3,037500868 | -0,17473387 |  |
| 1565917_at   | -               | -3,212234735 | -3,037500868 | -0,17473387 |  |
| 1570080_at   | -               | -3,212234735 | -3,037500868 | -0,17473387 |  |
| 1570205_at   | -               | -3,212234735 | -3,037500868 | -0,17473387 |  |
| 1570246_at   | -               | -3,212234735 | -3,037500868 | -0,17473387 |  |
| 219797_at    | MGAT4A          | -3,212234735 | -3,037500868 | -0,17473387 |  |
| 221037_s_at  | SLC25A31        | -3,212234735 | -3,037500868 | -0,17473387 |  |
| 224110_at    | PRO1804         | -3,212234735 | -3,037500868 | -0,17473387 |  |
| 234706_x_at  | -               | -3,212234735 | -3,037500868 | -0,17473387 |  |
| 241829_at    | FAM124A         | -3,212234735 | -3,037500868 | -0,17473387 |  |
| 202119_s_at  | CPNE3           | 5,28482464   | 5,459574496  | -0,17474986 |  |
| 203468_at    | CDK10           | 1,783520648  | 1,958277216  | -0,17475657 |  |
| 1555616_at   | -               | -0,741668563 | -0,566887459 | -0,1747811  |  |
| 1566456_at   | -               | -0,741668563 | -0,566887459 | -0,1747811  |  |
| 206595_at    | CST6            | -0,741668563 | -0,566887459 | -0,1747811  |  |
| 213707_s_at  | DLX5            | -0,741668563 | -0,566887459 | -0,1747811  |  |
| 216776_at    | -               | -0,741668563 | -0,566887459 | -0,1747811  |  |
| 220105_at    | RTDR1           | -0,741668563 | -0,566887459 | -0,1747811  |  |
| 230396_at    | SAMM50          | -0,741668563 | -0,566887459 | -0,1747811  |  |
| 234074_at    | -               | -0,741668563 | -0,566887459 | -0,1747811  |  |
| 235938_at    | ARMC9           | -0,741668563 | -0,566887459 | -0,1747811  |  |
| 224395_s_at  | RNF7            | 4,030853795  | 4,205686812  | -0,17483302 |  |
| 225527_at    | CEBPG           | 3,620156261  | 3,795004675  | -0,17484841 |  |
| 216457_s_at  | SF3A1           | 4,117238882  | 4,292109123  | -0,17487024 |  |
| 218508_at    | DCP1A           | 2,577249059  | 2,752192409  | -0,17494335 |  |
| 224478_s_at  | C7orf50         | 2,577249059  | 2,752192409  | -0,17494335 |  |
| 1553718_at   | ZNF548          | 1,823660386  | 1,998633167  | -0,17497278 |  |
| 223754_at    | C2orf88         | 2,883642771  | 3,058687544  | -0,17504477 |  |
| 204681_s_at  | RAPGEF5         | 1,119359127  | 1,294497133  | -0,17513801 |  |
| 225525_at    | KIAA1671        | 2,623460554  | 2,798646381  | -0,17518583 |  |
| 218866_s_at  | POLR3K          | 4,342753543  | 4,518071022  | -0,17531748 |  |
| 235736_at    | LOC100287482    | -0,221656139 | -0,046302147 | -0,17535399 |  |
| 238487_at    | GNL1            | -0,221656139 | -0,046302147 | -0,17535399 |  |
| 226437_at    | YIF1B           | 3,999522577  | 4,174906896  | -0,17538432 |  |
| 1557098_s_at | HAR1A           | -1,838812296 | -1,663414495 | -0,1753978  |  |
| 1557885_at   | -               | -1,838812296 | -1,663414495 | -0,1753978  |  |
| 1559575_a_at | AQP12A /// AQP1 | -1,838812296 | -1,663414495 | -0,1753978  |  |
| 1560262_at   | -               | -1,838812296 | -1,663414495 | -0,1753978  |  |
| 1561411_at   | -               | -1,838812296 | -1,663414495 | -0,1753978  |  |
| 1566766_a_at | MACC1           | -1,838812296 | -1,663414495 | -0,1753978  |  |
| 1569615_at   | -               | -1,838812296 | -1,663414495 | -0,1753978  |  |
| 203699_s_at  | DIO2            | -1,838812296 | -1,663414495 | -0,1753978  |  |
| 203854_at    | CFI             | -1,838812296 | -1,663414495 | -0,1753978  |  |
| 208216_at    | DLX4            | -1,838812296 | -1,663414495 | -0,1753978  |  |

|              |              |              |              |             |  |
|--------------|--------------|--------------|--------------|-------------|--|
| 211885_x_at  | FUT6         | -1,838812296 | -1,663414495 | -0,1753978  |  |
| 211891_s_at  | ARHGEF4      | -1,838812296 | -1,663414495 | -0,1753978  |  |
| 220492_s_at  | OTOF         | -1,838812296 | -1,663414495 | -0,1753978  |  |
| 226932_at    | SSPN         | -1,838812296 | -1,663414495 | -0,1753978  |  |
| 228265_at    | -            | -1,838812296 | -1,663414495 | -0,1753978  |  |
| 234727_at    | DNAH7        | -1,838812296 | -1,663414495 | -0,1753978  |  |
| 236771_at    | RIPPLY2      | -1,838812296 | -1,663414495 | -0,1753978  |  |
| 237346_at    | TGDS         | -1,838812296 | -1,663414495 | -0,1753978  |  |
| 240624_x_at  | LOC100129463 | -1,838812296 | -1,663414495 | -0,1753978  |  |
| 242435_at    | PDE4A        | -1,838812296 | -1,663414495 | -0,1753978  |  |
| 243614_s_at  | PRODH2       | -1,838812296 | -1,663414495 | -0,1753978  |  |
| 243732_at    | LOC100506629 | -1,838812296 | -1,663414495 | -0,1753978  |  |
| 1555560_at   | UGGT2        | -2,866296344 | -2,690860744 | -0,1754356  |  |
| 1561754_at   | -            | -2,866296344 | -2,690860744 | -0,1754356  |  |
| 1563221_at   | LOC414300    | -2,866296344 | -2,690860744 | -0,1754356  |  |
| 1565602_at   | -            | -2,866296344 | -2,690860744 | -0,1754356  |  |
| 1566265_at   | -            | -2,866296344 | -2,690860744 | -0,1754356  |  |
| 1566764_at   | MACC1        | -2,866296344 | -2,690860744 | -0,1754356  |  |
| 1568406_at   | -            | -2,866296344 | -2,690860744 | -0,1754356  |  |
| 1568898_at   | -            | -2,866296344 | -2,690860744 | -0,1754356  |  |
| 1569525_s_at | LINC00516    | -2,866296344 | -2,690860744 | -0,1754356  |  |
| 1569811_at   | LOC729307    | -2,866296344 | -2,690860744 | -0,1754356  |  |
| 207664_at    | ADAM2        | -2,866296344 | -2,690860744 | -0,1754356  |  |
| 210096_at    | CYP4B1       | -2,866296344 | -2,690860744 | -0,1754356  |  |
| 217417_at    | MYO5A        | -2,866296344 | -2,690860744 | -0,1754356  |  |
| 226743_at    | SLFN11       | -2,866296344 | -2,690860744 | -0,1754356  |  |
| 228585_at    | ENTPD1       | -2,866296344 | -2,690860744 | -0,1754356  |  |
| 235220_at    | YIPF4        | -2,866296344 | -2,690860744 | -0,1754356  |  |
| 237035_at    | -            | -2,866296344 | -2,690860744 | -0,1754356  |  |
| 238375_at    | -            | -2,866296344 | -2,690860744 | -0,1754356  |  |
| 239935_at    | MDGA2        | -2,866296344 | -2,690860744 | -0,1754356  |  |
| 240845_at    | -            | -2,866296344 | -2,690860744 | -0,1754356  |  |
| 218456_at    | CAPRIN2      | 1,04816921   | 1,223626587  | -0,17545738 |  |
| 230118_at    | -            | 1,04816921   | 1,223626587  | -0,17545738 |  |
| 1556748_x_at | -            | 1,305306849  | 1,480766833  | -0,17545998 |  |
| 202411_at    | IFI27        | 4,421321457  | 4,59685817   | -0,17553671 |  |
| 234339_s_at  | GLTSCR2      | 3,457965575  | 3,633530837  | -0,17556526 |  |
| 222433_at    | ENAH         | 3,319065909  | 3,49464046   | -0,17557455 |  |
| 1556894_at   | NT5DC2       | -2,262747984 | -2,086984744 | -0,17576324 |  |
| 1557345_at   | LOC283516    | -2,262747984 | -2,086984744 | -0,17576324 |  |
| 1558163_at   | PEX13        | -2,262747984 | -2,086984744 | -0,17576324 |  |
| 1559029_at   | -            | -2,262747984 | -2,086984744 | -0,17576324 |  |
| 1559617_at   | LOC100505565 | -2,262747984 | -2,086984744 | -0,17576324 |  |
| 1559889_at   | -            | -2,262747984 | -2,086984744 | -0,17576324 |  |
| 1563246_at   | LOC100270679 | -2,262747984 | -2,086984744 | -0,17576324 |  |
| 1567244_at   | OR5J2        | -2,262747984 | -2,086984744 | -0,17576324 |  |
| 1569495_at   | SCLT1        | -2,262747984 | -2,086984744 | -0,17576324 |  |
| 1570412_at   | -            | -2,262747984 | -2,086984744 | -0,17576324 |  |
| 204259_at    | MMP7         | -2,262747984 | -2,086984744 | -0,17576324 |  |
| 205267_at    | POU2AF1      | -2,262747984 | -2,086984744 | -0,17576324 |  |
| 206715_at    | TFEC         | -2,262747984 | -2,086984744 | -0,17576324 |  |
| 211811_s_at  | PCDHA6       | -2,262747984 | -2,086984744 | -0,17576324 |  |
| 212148_at    | PBX1         | -2,262747984 | -2,086984744 | -0,17576324 |  |
| 215923_s_at  | PSD4         | -2,262747984 | -2,086984744 | -0,17576324 |  |
| 216780_at    | -            | -2,262747984 | -2,086984744 | -0,17576324 |  |
| 217397_at    | YME1L1       | -2,262747984 | -2,086984744 | -0,17576324 |  |

|             |                 |              |              |             |  |
|-------------|-----------------|--------------|--------------|-------------|--|
| 220638_s_at | CBLC            | -2,262747984 | -2,086984744 | -0,17576324 |  |
| 220860_at   | PURG            | -2,262747984 | -2,086984744 | -0,17576324 |  |
| 221169_s_at | HRH4            | -2,262747984 | -2,086984744 | -0,17576324 |  |
| 223708_at   | C1QTNF4         | -2,262747984 | -2,086984744 | -0,17576324 |  |
| 224006_at   | LOC100507377    | -2,262747984 | -2,086984744 | -0,17576324 |  |
| 225895_at   | SYNPO2          | -2,262747984 | -2,086984744 | -0,17576324 |  |
| 230420_at   | CASZ1           | -2,262747984 | -2,086984744 | -0,17576324 |  |
| 231435_at   | C7orf34         | -2,262747984 | -2,086984744 | -0,17576324 |  |
| 232855_at   | -               | -2,262747984 | -2,086984744 | -0,17576324 |  |
| 233257_at   | -               | -2,262747984 | -2,086984744 | -0,17576324 |  |
| 233610_at   | LOC645355       | -2,262747984 | -2,086984744 | -0,17576324 |  |
| 235942_at   | FAM224A /// FAM | -2,262747984 | -2,086984744 | -0,17576324 |  |
| 236761_at   | LHFPL3          | -2,262747984 | -2,086984744 | -0,17576324 |  |
| 237750_at   | XPNPEP3         | -2,262747984 | -2,086984744 | -0,17576324 |  |
| 238588_at   | -               | -2,262747984 | -2,086984744 | -0,17576324 |  |
| 239025_at   | -               | -2,262747984 | -2,086984744 | -0,17576324 |  |
| 241001_at   | -               | -2,262747984 | -2,086984744 | -0,17576324 |  |
| 243384_at   | -               | -2,262747984 | -2,086984744 | -0,17576324 |  |
| 244419_at   | FRZB            | -2,262747984 | -2,086984744 | -0,17576324 |  |
| 244532_x_at | -               | -2,262747984 | -2,086984744 | -0,17576324 |  |
| 225225_at   | OIP5-AS1        | 3,785615967  | 3,96146507   | -0,1758491  |  |
| 218749_s_at | SLC24A6         | 0,641402394  | 0,817300337  | -0,17589794 |  |
| 219193_at   | WDR70           | 2,846658948  | 3,022611001  | -0,17595205 |  |
| 213234_at   | KIAA1467        | 1,414471577  | 1,590454215  | -0,17598264 |  |
| 200654_at   | P4HB            | 5,675971499  | 5,852042571  | -0,17607107 |  |
| 223129_x_at | MYLIP           | 3,943175539  | 4,119256941  | -0,1760814  |  |
| 238962_at   | ZNF681          | 1,46610492   | 1,642321262  | -0,17621634 |  |
| 209717_at   | EVI5            | 2,127340679  | 2,303602088  | -0,17626141 |  |
| 209817_at   | PPP3CB          | 2,127340679  | 2,303602088  | -0,17626141 |  |
| 206092_x_at | RTEL1           | 0,728550685  | 0,904843258  | -0,17629257 |  |
| 204927_at   | RASSF7          | 2,109966786  | 2,286318242  | -0,17635146 |  |
| 200011_s_at | ARF3            | 3,92199823   | 4,098363749  | -0,17636552 |  |
| 223014_at   | UBE2R2          | 3,49093683   | 3,667303849  | -0,17636702 |  |
| 205071_x_at | XRCC4           | 1,614289682  | 1,790660532  | -0,17637085 |  |
| 205677_s_at | DLEU1           | 4,000869774  | 4,177252958  | -0,17638318 |  |
| 203934_at   | KDR             | 3,917011805  | 4,093403416  | -0,17639161 |  |
| 202021_x_at | EIF1            | 5,708492423  | 5,884889123  | -0,1763967  |  |
| 235201_at   | FOXP2           | 2,159061673  | 2,335461563  | -0,17639989 |  |
| 227435_at   | KIAA2018        | 0,853119696  | 1,029536893  | -0,1764172  |  |
| 226384_at   | PPAPDC1B        | 1,515954005  | 1,692388143  | -0,17643414 |  |
| 230879_at   | BAG2            | 1,515954005  | 1,692388143  | -0,17643414 |  |
| 222905_s_at | TMEM143         | 1,683039483  | 1,859476797  | -0,17643731 |  |
| 212194_s_at | TM9SF4          | 2,206540699  | 2,382985886  | -0,17644519 |  |
| 201347_x_at | GRHPR           | 3,166555554  | 3,343031718  | -0,17647616 |  |
| 200648_s_at | GLUL            | 3,571118904  | 3,747642277  | -0,17652337 |  |
| 218080_x_at | FAF1            | 3,844579258  | 4,021126974  | -0,17654772 |  |
| 202017_at   | EPHX1           | -0,148196756 | 0,028364014  | -0,17656077 |  |
| 205779_at   | RAMP2           | -0,148196756 | 0,028364014  | -0,17656077 |  |
| 207287_at   | FLJ14107        | -0,148196756 | 0,028364014  | -0,17656077 |  |
| 211173_at   | CCKAR           | -0,148196756 | 0,028364014  | -0,17656077 |  |
| 219532_at   | ELOVL4          | -0,148196756 | 0,028364014  | -0,17656077 |  |
| 219616_at   | ACSS3           | -0,148196756 | 0,028364014  | -0,17656077 |  |
| 229248_at   | UCHL5           | -0,148196756 | 0,028364014  | -0,17656077 |  |
| 230648_at   | LOC283663       | -0,148196756 | 0,028364014  | -0,17656077 |  |
| 204611_s_at | PPP2R5B         | 0,810733188  | 0,987376598  | -0,17664341 |  |
| 214840_at   | TOM1L2          | 0,810733188  | 0,987376598  | -0,17664341 |  |

|              |                           |              |              |             |  |
|--------------|---------------------------|--------------|--------------|-------------|--|
| 230151_at    | SPRYD7                    | 0,810733188  | 0,987376598  | -0,17664341 |  |
| 235275_at    | BMP8B                     | 0,810733188  | 0,987376598  | -0,17664341 |  |
| 1554649_at   | -                         | -1,089016378 | -0,912331589 | -0,17668479 |  |
| 1568636_a_at | -                         | -1,089016378 | -0,912331589 | -0,17668479 |  |
| 206538_at    | MRAS                      | -1,089016378 | -0,912331589 | -0,17668479 |  |
| 215141_at    | NOP14-AS1                 | -1,089016378 | -0,912331589 | -0,17668479 |  |
| 221463_at    | CCL24                     | -1,089016378 | -0,912331589 | -0,17668479 |  |
| 223694_at    | TRIM7                     | -1,089016378 | -0,912331589 | -0,17668479 |  |
| 230216_at    | C12orf51                  | -1,089016378 | -0,912331589 | -0,17668479 |  |
| 230894_s_at  | -                         | -1,089016378 | -0,912331589 | -0,17668479 |  |
| 231590_at    | GATM                      | -1,089016378 | -0,912331589 | -0,17668479 |  |
| 232503_at    | -                         | -1,089016378 | -0,912331589 | -0,17668479 |  |
| 232942_at    | PYROXD2                   | -1,089016378 | -0,912331589 | -0,17668479 |  |
| 233835_at    | LOC90246                  | -1,089016378 | -0,912331589 | -0,17668479 |  |
| 242487_at    | CC2D1B                    | -1,089016378 | -0,912331589 | -0,17668479 |  |
| 244019_at    | -                         | -1,089016378 | -0,912331589 | -0,17668479 |  |
| 214843_s_at  | USP33                     | 2,266015882  | 2,442710777  | -0,17669489 |  |
| 225695_at    | C2orf18                   | 2,266015882  | 2,442710777  | -0,17669489 |  |
| 225657_at    | LOC152217                 | 3,575646363  | 3,75237043   | -0,17672407 |  |
| 211012_s_at  | PML                       | 0,928678725  | 1,105412836  | -0,17673411 |  |
| 208736_at    | ARPC3                     | 5,168558587  | 5,345296937  | -0,17673835 |  |
| 221099_at    | -                         | 0,072842263  | 0,249604176  | -0,17676191 |  |
| 226047_at    | MRVI1                     | 0,072842263  | 0,249604176  | -0,17676191 |  |
| 205644_s_at  | SNRPG                     | 6,627760885  | 6,804576426  | -0,17681554 |  |
| 223033_s_at  | SCYL1                     | 1,889144008  | 2,066015817  | -0,17687181 |  |
| 204321_at    | NEO1                      | 3,685285822  | 3,862161446  | -0,17687562 |  |
| 207842_s_at  | CASC3                     | 2,621710292  | 2,798646381  | -0,17693609 |  |
| 205347_s_at  | TMSB15A /// TMSB15A       | 3,823415835  | 4,00040886   | -0,17699302 |  |
| 219408_at    | PRMT7                     | 1,000476627  | 1,177496821  | -0,17702019 |  |
| 223254_s_at  | G2E3                      | 1,722769813  | 1,899812471  | -0,17704266 |  |
| 201039_s_at  | RAD23A                    | 2,035673598  | 2,212749286  | -0,17707569 |  |
| 1555176_at   | -                         | -1,964176657 | -1,787089803 | -0,17708685 |  |
| 1562619_at   | NME9                      | -1,964176657 | -1,787089803 | -0,17708685 |  |
| 1563621_at   | -                         | -1,964176657 | -1,787089803 | -0,17708685 |  |
| 1568905_at   | -                         | -1,964176657 | -1,787089803 | -0,17708685 |  |
| 206244_at    | CR1                       | -1,964176657 | -1,787089803 | -0,17708685 |  |
| 214922_at    | ZNF484                    | -1,964176657 | -1,787089803 | -0,17708685 |  |
| 214967_at    | -                         | -1,964176657 | -1,787089803 | -0,17708685 |  |
| 215724_at    | PLD1                      | -1,964176657 | -1,787089803 | -0,17708685 |  |
| 217172_at    | -                         | -1,964176657 | -1,787089803 | -0,17708685 |  |
| 217449_at    | -                         | -1,964176657 | -1,787089803 | -0,17708685 |  |
| 223951_at    | -                         | -1,964176657 | -1,787089803 | -0,17708685 |  |
| 228080_at    | LAYN                      | -1,964176657 | -1,787089803 | -0,17708685 |  |
| 229842_at    | ELF3                      | -1,964176657 | -1,787089803 | -0,17708685 |  |
| 230500_at    | PDE7A                     | -1,964176657 | -1,787089803 | -0,17708685 |  |
| 236105_at    | ZBTB10                    | -1,964176657 | -1,787089803 | -0,17708685 |  |
| 240220_at    | -                         | -1,964176657 | -1,787089803 | -0,17708685 |  |
| 201793_x_at  | SMG7                      | -0,00073712  | 0,176436073  | -0,17717319 |  |
| 212664_at    | TUBB4A                    | -0,00073712  | 0,176436073  | -0,17717319 |  |
| 223514_at    | CARD11                    | -0,00073712  | 0,176436073  | -0,17717319 |  |
| 225608_at    | SNX29                     | -0,00073712  | 0,176436073  | -0,17717319 |  |
| 235159_at    | -                         | 2,320980353  | 2,498185745  | -0,17720539 |  |
| 1555673_at   | KRTAP2-4 /// LOC101928232 | -2,138804305 | -1,961547147 | -0,17725716 |  |
| 1561238_at   | PEX2                      | -2,138804305 | -1,961547147 | -0,17725716 |  |
| 1561455_at   | LOC284294                 | -2,138804305 | -1,961547147 | -0,17725716 |  |
| 1568938_at   | -                         | -2,138804305 | -1,961547147 | -0,17725716 |  |



|              |           |              |              |             |  |
|--------------|-----------|--------------|--------------|-------------|--|
| 1569853_at   | -         | -2,138804305 | -1,961547147 | -0,17725716 |  |
| 205150_s_at  | TRIL      | -2,138804305 | -1,961547147 | -0,17725716 |  |
| 206306_at    | RYR3      | -2,138804305 | -1,961547147 | -0,17725716 |  |
| 210496_at    | NAG18     | -2,138804305 | -1,961547147 | -0,17725716 |  |
| 210930_s_at  | ERBB2     | -2,138804305 | -1,961547147 | -0,17725716 |  |
| 214013_s_at  | TBC1D1    | -2,138804305 | -1,961547147 | -0,17725716 |  |
| 214026_s_at  | SPRED2    | -2,138804305 | -1,961547147 | -0,17725716 |  |
| 232187_at    | PALMD     | -2,138804305 | -1,961547147 | -0,17725716 |  |
| 236291_at    | RDH5      | -2,138804305 | -1,961547147 | -0,17725716 |  |
| 237029_at    | HGD       | -2,138804305 | -1,961547147 | -0,17725716 |  |
| 240196_at    | -         | -2,138804305 | -1,961547147 | -0,17725716 |  |
| 242237_at    | -         | -2,138804305 | -1,961547147 | -0,17725716 |  |
| 244184_at    | -         | -2,138804305 | -1,961547147 | -0,17725716 |  |
| 1552930_at   | MMEL1     | 0,20027154   | 0,377530647  | -0,17725911 |  |
| 216282_x_at  | POLR2C    | 0,20027154   | 0,377530647  | -0,17725911 |  |
| 227134_at    | SYTL1     | 0,20027154   | 0,377530647  | -0,17725911 |  |
| 238894_at    | -         | 0,20027154   | 0,377530647  | -0,17725911 |  |
| 224933_s_at  | JMJD1C    | 0,376672223  | 0,553993624  | -0,1773214  |  |
| 1559957_a_at | LOC642852 | 1,348276312  | 1,525647381  | -0,17737107 |  |
| 221432_s_at  | SLC25A28  | 1,348276312  | 1,525647381  | -0,17737107 |  |
| 1558160_at   | CCDC171   | -2,089474779 | -1,912089812 | -0,17738497 |  |
| 1560836_at   | -         | -2,089474779 | -1,912089812 | -0,17738497 |  |
| 1560957_at   | -         | -2,089474779 | -1,912089812 | -0,17738497 |  |
| 1561045_a_at | -         | -2,089474779 | -1,912089812 | -0,17738497 |  |
| 1566841_at   | -         | -2,089474779 | -1,912089812 | -0,17738497 |  |
| 1569826_at   | -         | -2,089474779 | -1,912089812 | -0,17738497 |  |
| 1570089_at   | -         | -2,089474779 | -1,912089812 | -0,17738497 |  |
| 205290_s_at  | BMP2      | -2,089474779 | -1,912089812 | -0,17738497 |  |
| 207099_s_at  | CHM       | -2,089474779 | -1,912089812 | -0,17738497 |  |
| 208182_x_at  | IFNA14    | -2,089474779 | -1,912089812 | -0,17738497 |  |
| 215912_at    | GNAO1     | -2,089474779 | -1,912089812 | -0,17738497 |  |
| 216946_at    | HLA-DOA   | -2,089474779 | -1,912089812 | -0,17738497 |  |
| 217359_s_at  | NCAM1     | -2,089474779 | -1,912089812 | -0,17738497 |  |
| 219101_x_at  | ABHD8     | -2,089474779 | -1,912089812 | -0,17738497 |  |
| 223696_at    | ARSD      | -2,089474779 | -1,912089812 | -0,17738497 |  |
| 224803_s_at  | MRPL20    | -2,089474779 | -1,912089812 | -0,17738497 |  |
| 229401_at    | IL17RE    | -2,089474779 | -1,912089812 | -0,17738497 |  |
| 231915_at    | ZSWIM4    | -2,089474779 | -1,912089812 | -0,17738497 |  |
| 240635_at    | -         | -2,089474779 | -1,912089812 | -0,17738497 |  |
| 242046_at    | -         | -2,089474779 | -1,912089812 | -0,17738497 |  |
| 242831_at    | -         | -2,089474779 | -1,912089812 | -0,17738497 |  |
| 244058_at    | VSTM4     | -2,089474779 | -1,912089812 | -0,17738497 |  |
| 210648_x_at  | SNX3      | 6,39103257   | 6,568505252  | -0,17747268 |  |
| 210378_s_at  | SSNA1     | 2,640847372  | 2,81832103   | -0,17747366 |  |
| 227139_s_at  | HPS3      | 2,361396186  | 2,538891651  | -0,17749546 |  |
| 204344_s_at  | SEC23A    | 1,40228911   | 1,579853228  | -0,17756412 |  |
| 228369_at    | CNPY3     | 1,40228911   | 1,579853228  | -0,17756412 |  |
| 223590_at    | ZNF700    | 4,285314988  | 4,462889331  | -0,17757434 |  |
| 1555375_at   | GRIK2     | -3,41365796  | -3,236070201 | -0,17758776 |  |
| 1569810_at   | -         | -3,41365796  | -3,236070201 | -0,17758776 |  |
| 206952_at    | G6PC      | -3,41365796  | -3,236070201 | -0,17758776 |  |
| 222832_s_at  | MFF       | 4,029534322  | 4,207122602  | -0,17758828 |  |
| 221902_at    | GPR153    | 0,133056859  | 0,310717132  | -0,17766027 |  |
| 209867_s_at  | LPHN3     | 0,317354302  | 0,495031851  | -0,17767755 |  |
| 240128_at    | -         | 0,317354302  | 0,495031851  | -0,17767755 |  |
| 229518_at    | FAM46B    | 0,480753764  | 0,658444279  | -0,17769052 |  |

|              |                 |              |              |             |  |
|--------------|-----------------|--------------|--------------|-------------|--|
| 235492_at    | RNF217          | 0,480753764  | 0,658444279  | -0,17769052 |  |
| 204535_s_at  | REST            | 0,627515113  | 0,805216064  | -0,17770095 |  |
| 215005_at    | NECAB2          | 0,627515113  | 0,805216064  | -0,17770095 |  |
| 236515_at    | -               | 0,627515113  | 0,805216064  | -0,17770095 |  |
| 238703_at    | FAM207A         | 0,627515113  | 0,805216064  | -0,17770095 |  |
| 211271_x_at  | PTBP1           | 5,361287065  | 5,539024791  | -0,17773773 |  |
| 206376_at    | SLC6A15         | 1,454352496  | 1,632095957  | -0,17774346 |  |
| 222634_s_at  | TBL1XR1         | 2,082235068  | 2,259997914  | -0,17776285 |  |
| 227352_at    | SWSAP1          | 3,171349466  | 3,349287209  | -0,17793774 |  |
| 200666_s_at  | DNAJB1          | 5,075404701  | 5,253365418  | -0,17796072 |  |
| 227338_at    | -               | 2,146943689  | 2,324919719  | -0,17797603 |  |
| 212033_at    | RBM25           | 5,283994913  | 5,461981887  | -0,17798697 |  |
| 209973_at    | NFKBIL1         | 0,715481152  | 0,893473268  | -0,17799212 |  |
| 1554667_s_at | METTL8          | 2,438982012  | 2,617011906  | -0,17802989 |  |
| 209121_x_at  | NR2F2           | 2,438982012  | 2,617011906  | -0,17802989 |  |
| 241201_at    | UVSSA           | 0,425644434  | 0,603679647  | -0,17803521 |  |
| 203855_at    | WDR47           | 2,314494121  | 2,492544876  | -0,17805076 |  |
| 220397_at    | MDM1            | 0,255492549  | 0,433557298  | -0,17806475 |  |
| 228054_at    | TMEM44          | 0,255492549  | 0,433557298  | -0,17806475 |  |
| 225434_at    | DEDD2           | 2,577249059  | 2,755336312  | -0,17808725 |  |
| 205449_at    | SAC3D1          | 3,702775533  | 3,880994209  | -0,17821868 |  |
| 200991_s_at  | SNX17           | 3,341570404  | 3,519816196  | -0,17824579 |  |
| 224347_x_at  | UBE2J2          | 1,283332461  | 1,461646549  | -0,17831409 |  |
| 227408_s_at  | SNX25           | 1,283332461  | 1,461646549  | -0,17831409 |  |
| 221709_s_at  | ZNF839          | 1,094335495  | 1,272721751  | -0,17838626 |  |
| 201540_at    | FHL1            | 1,339784194  | 1,518263577  | -0,17847938 |  |
| 233656_s_at  | VPS54           | 2,338135744  | 2,516830926  | -0,17869518 |  |
| 226081_at    | LZIC            | 2,173470163  | 2,352169913  | -0,17869975 |  |
| 209159_s_at  | NDRG4           | 2,825526235  | 3,004228687  | -0,17870245 |  |
| 217886_at    | EPS15           | 2,446911392  | 2,625627364  | -0,17871597 |  |
| 226581_at    | ZFYVE20         | 2,294858597  | 2,473581079  | -0,17872248 |  |
| 203145_at    | SPAG5           | 2,510717331  | 2,689475799  | -0,17875847 |  |
| 227199_at    | DIP2A           | 4,301804532  | 4,480569206  | -0,17876467 |  |
| 218244_at    | NOL8            | 4,120341088  | 4,299127518  | -0,17878643 |  |
| 1555728_a_at | MS4A4A          | 3,315822132  | 3,49464046   | -0,17881833 |  |
| 235252_at    | KSR1            | 1,968405881  | 2,147243253  | -0,17883737 |  |
| 203794_at    | CDC42BPA        | 2,107467633  | 2,286318242  | -0,17885061 |  |
| 221516_s_at  | SMCR7L          | 3,49093683   | 3,669805237  | -0,17886841 |  |
| 224879_at    | C9orf123        | 3,164152611  | 3,343031718  | -0,17887911 |  |
| 243249_at    | -               | 1,85379461   | 2,032717854  | -0,17892324 |  |
| 221507_at    | TNPO2           | 3,356380711  | 3,535445117  | -0,17906441 |  |
| 203988_s_at  | FUT8            | 3,593615441  | 3,7726819    | -0,17906646 |  |
| 224575_at    | BRK1 /// LOC100 | 5,208169782  | 5,387446626  | -0,17927684 |  |
| 1557419_a_at | ACSL4           | -1,399512875 | -1,220210588 | -0,17930229 |  |
| 1558322_a_at | PAQR9           | -1,399512875 | -1,220210588 | -0,17930229 |  |
| 1562651_at   | ZSCAN1          | -1,399512875 | -1,220210588 | -0,17930229 |  |
| 1563868_a_at | FAM75E1         | -1,399512875 | -1,220210588 | -0,17930229 |  |
| 1565306_a_at | SLC8A1          | -1,399512875 | -1,220210588 | -0,17930229 |  |
| 1569758_at   | -               | -1,399512875 | -1,220210588 | -0,17930229 |  |
| 203030_s_at  | PTPRN2          | -1,399512875 | -1,220210588 | -0,17930229 |  |
| 203766_s_at  | LMOD1           | -1,399512875 | -1,220210588 | -0,17930229 |  |
| 207946_at    | MAML3           | -1,399512875 | -1,220210588 | -0,17930229 |  |
| 215874_at    | -               | -1,399512875 | -1,220210588 | -0,17930229 |  |
| 218693_at    | TSPAN15         | -1,399512875 | -1,220210588 | -0,17930229 |  |
| 221644_s_at  | SLC45A2         | -1,399512875 | -1,220210588 | -0,17930229 |  |
| 228550_at    | RTN4R           | -1,399512875 | -1,220210588 | -0,17930229 |  |

|              |                |              |              |             |  |
|--------------|----------------|--------------|--------------|-------------|--|
| 229698_at    | -              | -1,399512875 | -1,220210588 | -0,17930229 |  |
| 234539_at    | ADARB1         | -1,399512875 | -1,220210588 | -0,17930229 |  |
| 234708_at    | SMUG1          | -1,399512875 | -1,220210588 | -0,17930229 |  |
| 235376_at    | -              | -1,399512875 | -1,220210588 | -0,17930229 |  |
| 237730_at    | LOC100130700   | -1,399512875 | -1,220210588 | -0,17930229 |  |
| 237827_at    | -              | -1,399512875 | -1,220210588 | -0,17930229 |  |
| 239526_x_at  | PTPN1          | -1,399512875 | -1,220210588 | -0,17930229 |  |
| 242379_at    | -              | -1,399512875 | -1,220210588 | -0,17930229 |  |
| 243922_at    | -              | -1,399512875 | -1,220210588 | -0,17930229 |  |
| 244884_at    | LOC100507150   | -1,399512875 | -1,220210588 | -0,17930229 |  |
| 206647_at    | HBZ            | 3,408067074  | 3,587527995  | -0,17946092 |  |
| 205172_x_at  | CLTB           | 2,303618506  | 2,483094137  | -0,17947563 |  |
| 200058_s_at  | SNRNP200       | 4,611022217  | 4,790501109  | -0,17947889 |  |
| 218494_s_at  | SLC2A4RG       | 2,288253583  | 2,467842989  | -0,17958941 |  |
| 208206_s_at  | RASGRP2        | 3,101484927  | 3,281121096  | -0,17963617 |  |
| 1553115_at   | NKD1           | -0,43775896  | -0,258114234 | -0,17964473 |  |
| 1553846_at   | SPERT          | -0,43775896  | -0,258114234 | -0,17964473 |  |
| 1559674_at   | ZNF333         | -0,43775896  | -0,258114234 | -0,17964473 |  |
| 1564498_at   | -              | -0,43775896  | -0,258114234 | -0,17964473 |  |
| 217521_at    | HAL            | -0,43775896  | -0,258114234 | -0,17964473 |  |
| 230295_at    | LOC100507047 / | -0,43775896  | -0,258114234 | -0,17964473 |  |
| 231043_at    | PCDP1          | -0,43775896  | -0,258114234 | -0,17964473 |  |
| 234128_at    | -              | -0,43775896  | -0,258114234 | -0,17964473 |  |
| 1558568_a_at | -              | -0,172274514 | 0,007421914  | -0,17969643 |  |
| 218452_at    | SMARCAL1       | 2,658027143  | 2,837730973  | -0,17970383 |  |
| 209263_x_at  | TSPAN4         | 1,923647937  | 2,103505212  | -0,17985728 |  |
| 218460_at    | HEATR2         | 4,211016843  | 4,390931194  | -0,17991435 |  |
| 226133_s_at  | TBC1D10A       | 1,655931423  | 1,835911187  | -0,17997976 |  |
| 239886_at    | -              | -0,022466681 | 0,157549243  | -0,18001592 |  |
| 201583_s_at  | SEC23B         | 3,769107843  | 3,949162156  | -0,18005431 |  |
| 201790_s_at  | DHCR7          | 2,327437554  | 2,507538456  | -0,1801009  |  |
| 214117_s_at  | BTD            | 1,114389003  | 1,294497133  | -0,18010813 |  |
| 1555426_a_at | OTUD5          | 1,742232072  | 1,922365006  | -0,18013293 |  |
| 212252_at    | CAMKK2         | 1,326951551  | 1,507116528  | -0,18016498 |  |
| 214659_x_at  | YLPM1          | 2,208874124  | 2,389070873  | -0,18019675 |  |
| 223132_s_at  | TRIM8          | 3,724955181  | 3,905256463  | -0,18030128 |  |
| 1552680_a_at | CASC5          | -0,259832361 | -0,079522948 | -0,18030941 |  |
| 204856_at    | B3GNT3         | -0,259832361 | -0,079522948 | -0,18030941 |  |
| 213869_x_at  | THY1           | -0,259832361 | -0,079522948 | -0,18030941 |  |
| 221273_s_at  | RNF208         | -0,259832361 | -0,079522948 | -0,18030941 |  |
| 207578_s_at  | HTR4           | 1,238353345  | 1,418668082  | -0,18031474 |  |
| 239843_at    | RIT1           | 1,238353345  | 1,418668082  | -0,18031474 |  |
| 1552799_at   | TSNARE1        | -1,131062212 | -0,950686014 | -0,1803762  |  |
| 1556809_a_at | -              | -1,131062212 | -0,950686014 | -0,1803762  |  |
| 1561320_at   | -              | -1,131062212 | -0,950686014 | -0,1803762  |  |
| 207162_s_at  | CACNA1B        | -1,131062212 | -0,950686014 | -0,1803762  |  |
| 210595_at    | ZNF235         | -1,131062212 | -0,950686014 | -0,1803762  |  |
| 210808_s_at  | NOX1           | -1,131062212 | -0,950686014 | -0,1803762  |  |
| 216910_at    | XPNPEP2        | -1,131062212 | -0,950686014 | -0,1803762  |  |
| 221083_at    | KCNQ4          | -1,131062212 | -0,950686014 | -0,1803762  |  |
| 225940_at    | EIF4E3         | -1,131062212 | -0,950686014 | -0,1803762  |  |
| 232789_at    | -              | -1,131062212 | -0,950686014 | -0,1803762  |  |
| 234917_at    | MARVELD1       | -1,131062212 | -0,950686014 | -0,1803762  |  |
| 227107_at    | -              | 2,59519831   | 2,775606361  | -0,18040805 |  |
| 242770_at    | LOC642236      | 0,606430281  | 0,786897721  | -0,18046744 |  |
| 214550_s_at  | TNPO3          | 3,540875956  | 3,721356767  | -0,18048081 |  |

|              |              |              |              |             |  |
|--------------|--------------|--------------|--------------|-------------|--|
| 201765_s_at  | HEXA         | 3,21379258   | 3,394350331  | -0,18055775 |  |
| 227590_at    | C22orf40     | 0,351548291  | 0,532164371  | -0,18061608 |  |
| 237426_at    | SP100        | 0,351548291  | 0,532164371  | -0,18061608 |  |
| 208877_at    | PAK2         | 3,329826127  | 3,510542997  | -0,18071687 |  |
| 218420_s_at  | PROSER1      | 1,859746653  | 2,040470494  | -0,18072384 |  |
| 218897_at    | TMEM177      | 1,859746653  | 2,040470494  | -0,18072384 |  |
| 236798_at    | LOC100505687 | 2,981056773  | 3,161800893  | -0,18074412 |  |
| 221582_at    | HIST3H2A     | 4,06796029   | 4,248708657  | -0,18074837 |  |
| 203444_s_at  | MTA2         | 0,457392764  | 0,638150376  | -0,18075761 |  |
| 217653_x_at  | -            | 0,457392764  | 0,638150376  | -0,18075761 |  |
| 233651_s_at  | MPND         | 0,457392764  | 0,638150376  | -0,18075761 |  |
| 201281_at    | ADRM1        | 4,427846607  | 4,608639705  | -0,1807931  |  |
| 203389_at    | KIF3C        | 0,859074518  | 1,039887232  | -0,18081271 |  |
| 225538_at    | ZCCHC9       | 3,411111015  | 3,591931093  | -0,18082094 |  |
| 224753_at    | CDCA5        | 3,377277984  | 3,558125564  | -0,18084758 |  |
| 235508_at    | PML          | 0,555999837  | 0,73688026   | -0,18088042 |  |
| 243395_at    | -            | 0,555999837  | 0,73688026   | -0,18088042 |  |
| 1552685_a_at | GRHL1        | -0,79540287  | -0,614371577 | -0,18103129 |  |
| 1560219_at   | ASB3         | -0,79540287  | -0,614371577 | -0,18103129 |  |
| 1564240_at   | LOC100130856 | -0,79540287  | -0,614371577 | -0,18103129 |  |
| 216025_x_at  | CYP2C9       | -0,79540287  | -0,614371577 | -0,18103129 |  |
| 217156_at    | -            | -0,79540287  | -0,614371577 | -0,18103129 |  |
| 238583_at    | MSRB3        | -0,79540287  | -0,614371577 | -0,18103129 |  |
| 240375_at    | -            | -0,79540287  | -0,614371577 | -0,18103129 |  |
| 227523_s_at  | PHF20L1      | 1,578645857  | 1,759685182  | -0,18103933 |  |
| 221816_s_at  | PHF11        | 2,171078719  | 2,352169913  | -0,18109119 |  |
| 225505_s_at  | PCED1A       | 2,691784869  | 2,87289275   | -0,18110788 |  |
| 217992_s_at  | EFHD2        | 3,629766844  | 3,810956512  | -0,18118967 |  |
| 1555707_at   | TNAP         | -0,946847173 | -0,765504029 | -0,18134314 |  |
| 1555748_x_at | CD79B        | -0,946847173 | -0,765504029 | -0,18134314 |  |
| 1559110_at   | -            | -0,946847173 | -0,765504029 | -0,18134314 |  |
| 1560448_at   | PRR7-AS1     | -0,946847173 | -0,765504029 | -0,18134314 |  |
| 206263_at    | FMO4         | -0,946847173 | -0,765504029 | -0,18134314 |  |
| 207884_at    | GUCY2D       | -0,946847173 | -0,765504029 | -0,18134314 |  |
| 214558_at    | GPR12        | -0,946847173 | -0,765504029 | -0,18134314 |  |
| 215271_at    | TNN          | -0,946847173 | -0,765504029 | -0,18134314 |  |
| 219461_at    | PAK6         | -0,946847173 | -0,765504029 | -0,18134314 |  |
| 220732_at    | PREX2        | -0,946847173 | -0,765504029 | -0,18134314 |  |
| 224042_at    | UPB1         | -0,946847173 | -0,765504029 | -0,18134314 |  |
| 229077_at    | KATNB1       | -0,946847173 | -0,765504029 | -0,18134314 |  |
| 230479_at    | EIF3F        | -0,946847173 | -0,765504029 | -0,18134314 |  |
| 233980_s_at  | VWF          | -0,946847173 | -0,765504029 | -0,18134314 |  |
| 238643_at    | -            | -0,946847173 | -0,765504029 | -0,18134314 |  |
| 241474_at    | -            | -0,946847173 | -0,765504029 | -0,18134314 |  |
| 243981_at    | STK4         | -0,946847173 | -0,765504029 | -0,18134314 |  |
| 1554293_at   | TTBK2        | -2,756478458 | -2,575129729 | -0,18134873 |  |
| 1555024_at   | ADAM22       | -2,756478458 | -2,575129729 | -0,18134873 |  |
| 1555492_a_at | BEST3        | -2,756478458 | -2,575129729 | -0,18134873 |  |
| 1559770_at   | -            | -2,756478458 | -2,575129729 | -0,18134873 |  |
| 1559780_at   | -            | -2,756478458 | -2,575129729 | -0,18134873 |  |
| 1561463_at   | -            | -2,756478458 | -2,575129729 | -0,18134873 |  |
| 1563190_at   | -            | -2,756478458 | -2,575129729 | -0,18134873 |  |
| 1569058_at   | GTF3C3       | -2,756478458 | -2,575129729 | -0,18134873 |  |
| 1570114_at   | MDGA2        | -2,756478458 | -2,575129729 | -0,18134873 |  |
| 204567_s_at  | ABCG1        | -2,756478458 | -2,575129729 | -0,18134873 |  |
| 208142_at    | EDDM3A       | -2,756478458 | -2,575129729 | -0,18134873 |  |

|              |                  |              |              |             |  |
|--------------|------------------|--------------|--------------|-------------|--|
| 215396_at    | GPR98            | -2,756478458 | -2,575129729 | -0,18134873 |  |
| 215657_at    | SLC26A3          | -2,756478458 | -2,575129729 | -0,18134873 |  |
| 215870_s_at  | PLA2G5           | -2,756478458 | -2,575129729 | -0,18134873 |  |
| 216947_at    | DES              | -2,756478458 | -2,575129729 | -0,18134873 |  |
| 225518_x_at  | MTHFD1L          | -2,756478458 | -2,575129729 | -0,18134873 |  |
| 228739_at    | CYS1             | -2,756478458 | -2,575129729 | -0,18134873 |  |
| 231293_at    | -                | -2,756478458 | -2,575129729 | -0,18134873 |  |
| 233861_at    | -                | -2,756478458 | -2,575129729 | -0,18134873 |  |
| 237719_x_at  | RGS7BP           | -2,756478458 | -2,575129729 | -0,18134873 |  |
| 237836_at    | -                | -2,756478458 | -2,575129729 | -0,18134873 |  |
| 238116_at    | DYNLRB2          | -2,756478458 | -2,575129729 | -0,18134873 |  |
| 238502_at    | -                | -2,756478458 | -2,575129729 | -0,18134873 |  |
| 240244_at    | -                | -2,756478458 | -2,575129729 | -0,18134873 |  |
| 241575_at    | -                | -2,756478458 | -2,575129729 | -0,18134873 |  |
| 242351_at    | -                | -2,756478458 | -2,575129729 | -0,18134873 |  |
| 242854_x_at  | DLEU2            | -2,756478458 | -2,575129729 | -0,18134873 |  |
| 243541_at    | IL31RA           | -2,756478458 | -2,575129729 | -0,18134873 |  |
| 224862_at    | GNAQ             | 2,864529541  | 3,045906378  | -0,18137684 |  |
| 218142_s_at  | CRBN             | 2,503131904  | 2,684536601  | -0,1814047  |  |
| 200647_x_at  | EIF3C /// EIF3CL | 5,02431927   | 5,205751817  | -0,18143255 |  |
| 229464_at    | MYEF2            | 1,168140757  | 1,349621332  | -0,18148057 |  |
| 226517_at    | BCAT1            | 2,621710292  | 2,803210557  | -0,18150027 |  |
| 210504_at    | KLF1             | 3,818840142  | 4,00040886   | -0,18156872 |  |
| 210502_s_at  | PPIE             | 2,562727117  | 2,744302548  | -0,18157543 |  |
| 205060_at    | PARG             | 1,965648824  | 2,147243253  | -0,18159443 |  |
| 218312_s_at  | ZSCAN18          | 3,513765154  | 3,695402096  | -0,18163694 |  |
| 200919_at    | PHC2             | 2,956271699  | 3,137910193  | -0,18163849 |  |
| 213115_at    | ATG4A            | 2,549899391  | 2,731588328  | -0,18168894 |  |
| 220206_at    | ZMYM1            | 1,850809354  | 2,032717854  | -0,1819085  |  |
| 224870_at    | DANCR            | 5,061269255  | 5,24318399   | -0,18191473 |  |
| 1556017_at   | NBEAL2           | -0,67289328  | -0,490927335 | -0,18196594 |  |
| 215890_at    | GM2A             | -0,67289328  | -0,490927335 | -0,18196594 |  |
| 218746_at    | TAPBPL           | -0,67289328  | -0,490927335 | -0,18196594 |  |
| 220691_at    | -                | -0,67289328  | -0,490927335 | -0,18196594 |  |
| 233855_at    | SCIMP            | -0,67289328  | -0,490927335 | -0,18196594 |  |
| 234575_at    | ZNF71            | -0,67289328  | -0,490927335 | -0,18196594 |  |
| 234707_x_at  | IGLV1-44         | -0,67289328  | -0,490927335 | -0,18196594 |  |
| 237042_at    | LOC100507024     | -0,67289328  | -0,490927335 | -0,18196594 |  |
| 239257_at    | MOV10L1          | -0,67289328  | -0,490927335 | -0,18196594 |  |
| 215354_s_at  | PELP1            | 2,132266459  | 2,314300277  | -0,18203382 |  |
| 231764_at    | CHRA1            | 3,24026957   | 3,42231092   | -0,18204135 |  |
| 212853_at    | DCUN1D4          | 0,962260738  | 1,144305291  | -0,18204455 |  |
| 222541_at    | RSF1             | 1,748661581  | 1,930732138  | -0,18207056 |  |
| 40016_g_at   | MAST4            | 2,705896113  | 2,888010592  | -0,18211448 |  |
| 221883_at    | PKNOX1           | 2,014487247  | 2,196649505  | -0,18216226 |  |
| 205047_s_at  | ASNS             | 3,96128107   | 4,143455947  | -0,18217488 |  |
| 1559167_x_at | MPV17L           | 2,082235068  | 2,264418116  | -0,18218305 |  |
| 219129_s_at  | SAP30L           | 1,593009234  | 1,775255987  | -0,18224675 |  |
| 224493_x_at  | TMEM241          | 1,638726528  | 1,820984782  | -0,18225825 |  |
| 203914_x_at  | HPGD             | 3,638448528  | 3,820743792  | -0,18229526 |  |
| 225586_at    | WDR85            | 1,995690482  | 2,17802703   | -0,18233655 |  |
| 1559188_x_at | -                | 0,682279745  | 0,864649967  | -0,18237022 |  |
| 218249_at    | ZDHHC6           | 4,176858496  | 4,359253484  | -0,18239499 |  |
| 213067_at    | MYH10            | 0,995078803  | 1,177496821  | -0,18241802 |  |
| 229720_at    | BAG1             | 1,063722698  | 1,246149888  | -0,18242719 |  |
| 205493_s_at  | DPYSL4           | 2,745814053  | 2,928263672  | -0,18244962 |  |

|              |                  |              |              |             |  |
|--------------|------------------|--------------|--------------|-------------|--|
| 225989_at    | HERC4            | 1,614289682  | 1,796776588  | -0,18248691 |  |
| 214430_at    | GLA              | 4,758484959  | 4,940979636  | -0,18249468 |  |
| 203229_s_at  | CLK2             | 2,531373922  | 2,713921281  | -0,18254736 |  |
| 205350_at    | CRABP1           | 0,882651021  | 1,065442793  | -0,18279177 |  |
| 213980_s_at  | CTBP1            | 3,51093129   | 3,693764321  | -0,18283303 |  |
| 200957_s_at  | SSRP1            | 4,154032218  | 4,336867701  | -0,18283548 |  |
| 238404_x_at  | SEZ6L2           | 0,334552598  | 0,51742585   | -0,18287325 |  |
| 219210_s_at  | RAB8B            | 3,149650293  | 3,332545245  | -0,18289495 |  |
| 224716_at    | MIR4647 /// SLC3 | 3,277429131  | 3,460374487  | -0,18294536 |  |
| 206095_s_at  | SRSF10           | 4,133297997  | 4,316259488  | -0,18296149 |  |
| 632_at       | GSK3A            | 1,927903479  | 2,110887591  | -0,18298411 |  |
| 215031_x_at  | RNF126           | 1,46610492   | 1,64909809   | -0,18299317 |  |
| 225738_at    | RAPGEF1          | 1,46610492   | 1,64909809   | -0,18299317 |  |
| 235085_at    | SGK223           | 1,46610492   | 1,64909809   | -0,18299317 |  |
| 204937_s_at  | ZNF274           | 3,704430214  | 3,887456383  | -0,18302617 |  |
| 225266_at    | ZNF652           | 1,305306849  | 1,488344553  | -0,1830377  |  |
| 227560_at    | SFXN2            | 1,305306849  | 1,488344553  | -0,1830377  |  |
| 219926_at    | POPODC3          | 2,630440446  | 2,813804482  | -0,18336404 |  |
| 219447_s_at  | SLC35C2          | 1,987559146  | 2,170981159  | -0,18342201 |  |
| 208160_at    | -                | -0,467091869 | -0,283667828 | -0,18342404 |  |
| 210955_at    | CASP10           | -0,467091869 | -0,283667828 | -0,18342404 |  |
| 214790_at    | SENP6            | -0,467091869 | -0,283667828 | -0,18342404 |  |
| 221300_at    | NPAP1            | -0,467091869 | -0,283667828 | -0,18342404 |  |
| 223366_at    | ZNF704           | -0,467091869 | -0,283667828 | -0,18342404 |  |
| 237379_at    | PHRF1            | -0,467091869 | -0,283667828 | -0,18342404 |  |
| 1559091_s_at | FGD2             | 0,273439642  | 0,456918297  | -0,18347866 |  |
| 204290_s_at  | ALDH6A1          | 0,273439642  | 0,456918297  | -0,18347866 |  |
| 226487_at    | FAM222A          | 0,273439642  | 0,456918297  | -0,18347866 |  |
| 220668_s_at  | DNMT3B           | 5,059654156  | 5,24318399   | -0,18352983 |  |
| 222489_s_at  | WRNIP1           | 4,687055355  | 4,870603662  | -0,18354831 |  |
| 1553961_s_at | SNX21            | 0,152582607  | 0,336136178  | -0,18355357 |  |
| 210021_s_at  | CCNO             | 0,152582607  | 0,336136178  | -0,18355357 |  |
| 216388_s_at  | LTB4R            | 0,152582607  | 0,336136178  | -0,18355357 |  |
| 218410_s_at  | PGP              | 0,152582607  | 0,336136178  | -0,18355357 |  |
| 204676_at    | TMEM186          | 2,182996494  | 2,366632651  | -0,18363616 |  |
| 207511_s_at  | CNPPD1           | 0,020670649  | 0,204310755  | -0,18364011 |  |
| 212483_at    | NIPBL            | 2,535098095  | 2,718761062  | -0,18366297 |  |
| 1567985_at   | -                | 1,894952274  | 2,078620836  | -0,18366856 |  |
| 227534_at    | AAED1            | 2,510717331  | 2,694398145  | -0,18368081 |  |
| 223271_s_at  | CTDSPL2          | 2,940912947  | 3,124599694  | -0,18368675 |  |
| 225197_at    | LOC100505487     | 2,314494121  | 2,498185745  | -0,18369162 |  |
| 219063_at    | C1orf35          | 1,534677255  | 1,718396606  | -0,18371935 |  |
| 1552833_at   | B3GNT6           | -0,285837228 | -0,102100538 | -0,18373669 |  |
| 1557388_at   | RTTN             | -0,285837228 | -0,102100538 | -0,18373669 |  |
| 213177_at    | MAPK8IP3         | -0,285837228 | -0,102100538 | -0,18373669 |  |
| 214676_x_at  | MUC3B            | -0,285837228 | -0,102100538 | -0,18373669 |  |
| 216176_at    | HCRP1            | -0,285837228 | -0,102100538 | -0,18373669 |  |
| 222094_at    | SLX1A /// SLX1A  | -0,285837228 | -0,102100538 | -0,18373669 |  |
| 233646_at    | -                | -0,285837228 | -0,102100538 | -0,18373669 |  |
| 236529_at    | SRCRB4D          | -0,285837228 | -0,102100538 | -0,18373669 |  |
| 242290_at    | TACC1            | -0,285837228 | -0,102100538 | -0,18373669 |  |
| 204017_at    | KDEL3            | 1,119359127  | 1,303116084  | -0,18375696 |  |
| 225824_at    | CCNK             | 4,655325793  | 4,839094308  | -0,18376851 |  |
| 219385_at    | SLAMF8           | -0,57445847  | -0,39061235  | -0,18384612 |  |
| 220898_at    | -                | -0,57445847  | -0,39061235  | -0,18384612 |  |
| 227484_at    | SRGAP1           | -0,57445847  | -0,39061235  | -0,18384612 |  |

|              |                  |              |              |             |  |
|--------------|------------------|--------------|--------------|-------------|--|
| 231760_at    | LINC00029        | -0,57445847  | -0,39061235  | -0,18384612 |  |
| 235806_at    | ARAP3            | -0,57445847  | -0,39061235  | -0,18384612 |  |
| 237083_at    | -                | -0,57445847  | -0,39061235  | -0,18384612 |  |
| 239018_at    | DNAJC30          | -0,57445847  | -0,39061235  | -0,18384612 |  |
| 240406_at    | -                | -0,57445847  | -0,39061235  | -0,18384612 |  |
| 240459_at    | YTHDC1           | -0,57445847  | -0,39061235  | -0,18384612 |  |
| 238542_at    | ULBP2            | 3,052955227  | 3,236821511  | -0,18386628 |  |
| 219711_at    | ZNF586           | 1,795990708  | 1,979940779  | -0,18395007 |  |
| 210283_x_at  | PAIP1            | 3,298397722  | 3,482360311  | -0,18396259 |  |
| 218307_at    | RSAD1            | 2,458724341  | 2,64270545   | -0,18398111 |  |
| 208496_x_at  | HIST1H3A /// HIS | 2,017152618  | 2,201267805  | -0,18411519 |  |
| 1552314_a_at | EYA3             | 0,209623097  | 0,393761504  | -0,18413841 |  |
| 1557124_at   | TMEM198B         | 0,209623097  | 0,393761504  | -0,18413841 |  |
| 213844_at    | HOXA5            | 0,209623097  | 0,393761504  | -0,18413841 |  |
| 213870_at    | COL11A2          | 0,209623097  | 0,393761504  | -0,18413841 |  |
| 229661_at    | SALL4            | 0,209623097  | 0,393761504  | -0,18413841 |  |
| 232300_at    | LOC100133190     | 0,209623097  | 0,393761504  | -0,18413841 |  |
| 239108_at    | -                | 0,209623097  | 0,393761504  | -0,18413841 |  |
| 1558953_s_at | CEP164           | 1,774096855  | 1,958277216  | -0,18418036 |  |
| 212049_at    | WIPF2            | 1,481627361  | 1,665902186  | -0,18427482 |  |
| 203155_at    | SETDB1           | 0,945567441  | 1,129843209  | -0,18427577 |  |
| 213942_at    | MEGF6            | 0,083054335  | 0,26733076   | -0,18427642 |  |
| 224792_at    | TNKS1BP1         | 0,083054335  | 0,26733076   | -0,18427642 |  |
| 219311_at    | CEP76            | 3,006764929  | 3,191118448  | -0,18435352 |  |
| 201609_x_at  | ICMT             | 3,812716554  | 3,997092735  | -0,18437618 |  |
| 1557676_at   | -                | -0,055687482 | 0,128747141  | -0,18443462 |  |
| 209468_at    | LRP5             | -0,055687482 | 0,128747141  | -0,18443462 |  |
| 214813_at    | ZNF75D           | -0,055687482 | 0,128747141  | -0,18443462 |  |
| 224494_x_at  | HSD17B14         | -0,055687482 | 0,128747141  | -0,18443462 |  |
| 235418_at    | FAHD2A           | -0,055687482 | 0,128747141  | -0,18443462 |  |
| 239702_x_at  | -                | -0,055687482 | 0,128747141  | -0,18443462 |  |
| 206574_s_at  | PTP4A3           | 2,688444421  | 2,87289275   | -0,18444833 |  |
| 218991_at    | HEATR6           | 1,709647566  | 1,894118818  | -0,18447125 |  |
| 91826_at     | EPS8L1           | 1,504602299  | 1,689103868  | -0,18450157 |  |
| 63305_at     | PKNOX2           | -0,474524577 | -0,289989561 | -0,18453502 |  |
| 205148_s_at  | CLCN4            | 2,064305961  | 2,248887791  | -0,18458183 |  |
| 227093_at    | USP36            | 1,621313976  | 1,805902329  | -0,18458835 |  |
| 213503_x_at  | ANXA2            | 5,910876053  | 6,095525858  | -0,1846498  |  |
| 220856_x_at  | -                | 4,626378238  | 4,811041972  | -0,18466373 |  |
| 204735_at    | PDE4A            | 2,652894659  | 2,837730973  | -0,18483631 |  |
| 214494_s_at  | SPG7             | 2,959046717  | 3,14392006   | -0,18487334 |  |
| 206110_at    | HIST1H3H         | 4,158264286  | 4,343149918  | -0,18488563 |  |
| 1555817_s_at | THSD4            | -3,07502285  | -2,89013181  | -0,18489104 |  |
| 1557741_at   | LOC100128176     | -3,07502285  | -2,89013181  | -0,18489104 |  |
| 1569136_at   | MGAT4A           | -3,07502285  | -2,89013181  | -0,18489104 |  |
| 207245_at    | UGT2B17          | -3,07502285  | -2,89013181  | -0,18489104 |  |
| 215674_at    | -                | -3,07502285  | -2,89013181  | -0,18489104 |  |
| 216987_at    | IRF4             | -3,07502285  | -2,89013181  | -0,18489104 |  |
| 220401_at    | FLJ21369         | -3,07502285  | -2,89013181  | -0,18489104 |  |
| 224224_s_at  | PDE11A           | -3,07502285  | -2,89013181  | -0,18489104 |  |
| 227662_at    | SYNPO2           | -3,07502285  | -2,89013181  | -0,18489104 |  |
| 230061_at    | TM4SF18          | -3,07502285  | -2,89013181  | -0,18489104 |  |
| 230447_at    | FAXC             | -3,07502285  | -2,89013181  | -0,18489104 |  |
| 233766_at    | SOBP             | -3,07502285  | -2,89013181  | -0,18489104 |  |
| 237841_at    | -                | -3,07502285  | -2,89013181  | -0,18489104 |  |
| 238067_at    | TBC1D8B          | -3,07502285  | -2,89013181  | -0,18489104 |  |

|              |                 |              |              |             |
|--------------|-----------------|--------------|--------------|-------------|
| 243373_at    | -               | -3,07502285  | -2,89013181  | -0,18489104 |
| 244891_x_at  | -               | -3,07502285  | -2,89013181  | -0,18489104 |
| 1564907_s_at | MATR3 /// SNHG  | 1,549482847  | 1,73441697   | -0,18493412 |
| 227647_at    | KCNE3           | 1,549482847  | 1,73441697   | -0,18493412 |
| 202457_s_at  | PPP3CA          | 3,813483425  | 3,9984201    | -0,18493667 |
| 201750_s_at  | ECE1            | 0,747935635  | 0,932882274  | -0,18494664 |
| 207315_at    | CD226           | 0,747935635  | 0,932882274  | -0,18494664 |
| 239866_at    | -               | 0,747935635  | 0,932882274  | -0,18494664 |
| 203490_at    | ELF4            | 0,661985843  | 0,847075464  | -0,18508962 |
| 241577_at    | -               | 0,661985843  | 0,847075464  | -0,18508962 |
| 1552915_at   | IL28A           | -0,83191556  | -0,646746079 | -0,18516948 |
| 1554826_at   | CDK15           | -0,83191556  | -0,646746079 | -0,18516948 |
| 206903_at    | EXOG            | -0,83191556  | -0,646746079 | -0,18516948 |
| 207027_at    | HGFAC           | -0,83191556  | -0,646746079 | -0,18516948 |
| 235080_at    | CLUAP1          | -0,83191556  | -0,646746079 | -0,18516948 |
| 237661_at    | LOC100506997    | -0,83191556  | -0,646746079 | -0,18516948 |
| 238684_at    | SETDB2          | -0,83191556  | -0,646746079 | -0,18516948 |
| 222437_s_at  | CHMP3 /// RNF1  | 3,260656977  | 3,445853256  | -0,18519628 |
| 1556392_a_at | -               | -3,32387526  | -3,138626879 | -0,18524838 |
| 1562886_at   | -               | -3,32387526  | -3,138626879 | -0,18524838 |
| 210690_at    | KLRC4           | -3,32387526  | -3,138626879 | -0,18524838 |
| 204066_s_at  | AGAP1           | 0,57058931   | 0,755840599  | -0,18525129 |
| 208598_s_at  | HUWE1           | 3,973683876  | 4,158970399  | -0,18528652 |
| 38241_at     | BTN3A3          | -1,800538726 | -1,615132408 | -0,18540632 |
| 219016_at    | FASTKD5         | 3,998848507  | 4,18426834   | -0,18541983 |
| 218872_at    | TESC            | 2,05655332   | 2,242180416  | -0,1856271  |
| 243463_s_at  | RIT1            | 1,394109935  | 1,579853228  | -0,18574329 |
| 212266_s_at  | SRSF5           | 5,144076207  | 5,329827001  | -0,18575079 |
| 209490_s_at  | EGFL8 /// PPT2  | 2,197169074  | 2,382985886  | -0,18581681 |
| 222136_x_at  | ZNF43           | 2,860082603  | 3,045906378  | -0,18582378 |
| 222889_at    | DCLRE1B         | 2,166283906  | 2,352169913  | -0,18588601 |
| 227609_at    | EPSTI1          | 3,173740462  | 3,359653127  | -0,18591266 |
| 212856_at    | GRAMD4          | 1,542099044  | 1,728030156  | -0,18593111 |
| 202864_s_at  | SP100           | 1,968405881  | 2,154405725  | -0,18599984 |
| 215684_s_at  | ASCC2           | 1,780386218  | 1,966439221  | -0,186053   |
| 1557608_a_at | LOC284080       | -1,518072576 | -1,332017329 | -0,18605525 |
| 1560742_at   | -               | -1,518072576 | -1,332017329 | -0,18605525 |
| 1565748_at   | LOC100132815    | -1,518072576 | -1,332017329 | -0,18605525 |
| 1570326_at   | -               | -1,518072576 | -1,332017329 | -0,18605525 |
| 200879_s_at  | EPAS1 /// LOC10 | -1,518072576 | -1,332017329 | -0,18605525 |
| 207594_s_at  | SYNJ1           | -1,518072576 | -1,332017329 | -0,18605525 |
| 214135_at    | CLDN18          | -1,518072576 | -1,332017329 | -0,18605525 |
| 214233_at    | GGA2            | -1,518072576 | -1,332017329 | -0,18605525 |
| 214249_at    | TRIM2           | -1,518072576 | -1,332017329 | -0,18605525 |
| 220578_at    | ADAMTSL4        | -1,518072576 | -1,332017329 | -0,18605525 |
| 221285_at    | ST8SIA2         | -1,518072576 | -1,332017329 | -0,18605525 |
| 223761_at    | FGF19           | -1,518072576 | -1,332017329 | -0,18605525 |
| 231139_at    | -               | -1,518072576 | -1,332017329 | -0,18605525 |
| 231712_at    | ASCL5           | -1,518072576 | -1,332017329 | -0,18605525 |
| 231961_at    | RBPMS           | -1,518072576 | -1,332017329 | -0,18605525 |
| 233819_s_at  | LTN1            | -1,518072576 | -1,332017329 | -0,18605525 |
| 1569086_at   | LOC100287177    | 0,417596971  | 0,603679647  | -0,18608268 |
| 1552289_a_at | CILP2           | -1,196375121 | -1,010192375 | -0,18618275 |
| 1555410_at   | -               | -1,196375121 | -1,010192375 | -0,18618275 |
| 1562416_at   | -               | -1,196375121 | -1,010192375 | -0,18618275 |
| 1563300_at   | -               | -1,196375121 | -1,010192375 | -0,18618275 |



|              |                 |              |              |             |  |
|--------------|-----------------|--------------|--------------|-------------|--|
| 1566340_at   | SNORD8          | -1,196375121 | -1,010192375 | -0,18618275 |  |
| 208604_s_at  | HOXA3           | -1,196375121 | -1,010192375 | -0,18618275 |  |
| 215069_at    | NMT2            | -1,196375121 | -1,010192375 | -0,18618275 |  |
| 215386_at    | -               | -1,196375121 | -1,010192375 | -0,18618275 |  |
| 225237_s_at  | MSI2            | -1,196375121 | -1,010192375 | -0,18618275 |  |
| 238534_at    | -               | -1,196375121 | -1,010192375 | -0,18618275 |  |
| 238815_at    | LRRTM1          | -1,196375121 | -1,010192375 | -0,18618275 |  |
| 244174_at    | -               | -1,196375121 | -1,010192375 | -0,18618275 |  |
| 209560_s_at  | DLK1            | 7,612982829  | 7,799170767  | -0,18618794 |  |
| 206405_x_at  | USP6            | 2,084778276  | 2,271023131  | -0,18624485 |  |
| 218512_at    | WDR12           | 4,503454523  | 4,689754684  | -0,18630016 |  |
| 209199_s_at  | MEF2C           | 3,597182555  | 3,783501543  | -0,18631899 |  |
| 228754_at    | SLC6A6          | 2,37600538   | 2,562416132  | -0,18641075 |  |
| 223705_s_at  | GPBP1           | 4,338497447  | 4,524995365  | -0,18649792 |  |
| 202621_at    | IRF3            | 2,919702154  | 3,106248809  | -0,18654666 |  |
| 203857_s_at  | PDIA5           | 3,082523011  | 3,269073685  | -0,18655067 |  |
| 223345_at    | HDAC8           | 0,928678725  | 1,115234684  | -0,18655596 |  |
| 236681_at    | HOXD13          | 0,928678725  | 1,115234684  | -0,18655596 |  |
| 224955_at    | TEAD1           | 2,206540699  | 2,39311332   | -0,18657262 |  |
| 44040_at     | FBXO41          | 1,206012206  | 1,392656558  | -0,18664435 |  |
| 1560305_x_at | FKBP4           | 0,735041319  | 0,921731975  | -0,18669066 |  |
| 1560739_a_at | -               | 0,735041319  | 0,921731975  | -0,18669066 |  |
| 204385_at    | KYNU            | 0,853119696  | 1,039887232  | -0,18676754 |  |
| 230171_at    | -               | 0,853119696  | 1,039887232  | -0,18676754 |  |
| 207559_s_at  | ZMYM3           | 2,87191078   | 3,058687544  | -0,18677676 |  |
| 1552463_at   | SERPINB11       | -2,64318869  | -2,456406426 | -0,18678226 |  |
| 1557132_at   | WDR17           | -2,64318869  | -2,456406426 | -0,18678226 |  |
| 1562251_a_at | LOC574538       | -2,64318869  | -2,456406426 | -0,18678226 |  |
| 1562996_at   | -               | -2,64318869  | -2,456406426 | -0,18678226 |  |
| 1563461_at   | -               | -2,64318869  | -2,456406426 | -0,18678226 |  |
| 1566889_at   | THADA           | -2,64318869  | -2,456406426 | -0,18678226 |  |
| 1569466_at   | C20orf152       | -2,64318869  | -2,456406426 | -0,18678226 |  |
| 1569958_at   | -               | -2,64318869  | -2,456406426 | -0,18678226 |  |
| 1570188_at   | NR1I3           | -2,64318869  | -2,456406426 | -0,18678226 |  |
| 1570298_at   | -               | -2,64318869  | -2,456406426 | -0,18678226 |  |
| 202404_s_at  | COL1A2          | -2,64318869  | -2,456406426 | -0,18678226 |  |
| 207538_at    | IL4             | -2,64318869  | -2,456406426 | -0,18678226 |  |
| 207958_at    | UGT2A1 /// UGT2 | -2,64318869  | -2,456406426 | -0,18678226 |  |
| 213644_at    | CEP112          | -2,64318869  | -2,456406426 | -0,18678226 |  |
| 214217_at    | GRM5            | -2,64318869  | -2,456406426 | -0,18678226 |  |
| 214561_at    | LILRP2          | -2,64318869  | -2,456406426 | -0,18678226 |  |
| 215768_at    | -               | -2,64318869  | -2,456406426 | -0,18678226 |  |
| 215853_at    | -               | -2,64318869  | -2,456406426 | -0,18678226 |  |
| 217021_at    | CYB5A           | -2,64318869  | -2,456406426 | -0,18678226 |  |
| 223185_s_at  | BHLHE41         | -2,64318869  | -2,456406426 | -0,18678226 |  |
| 227318_at    | TMEM178B        | -2,64318869  | -2,456406426 | -0,18678226 |  |
| 228399_at    | OSR1            | -2,64318869  | -2,456406426 | -0,18678226 |  |
| 231325_at    | UNC5D           | -2,64318869  | -2,456406426 | -0,18678226 |  |
| 232962_x_at  | -               | -2,64318869  | -2,456406426 | -0,18678226 |  |
| 233321_x_at  | LOC90834        | -2,64318869  | -2,456406426 | -0,18678226 |  |
| 233481_at    | -               | -2,64318869  | -2,456406426 | -0,18678226 |  |
| 234025_at    | -               | -2,64318869  | -2,456406426 | -0,18678226 |  |
| 238586_at    | -               | -2,64318869  | -2,456406426 | -0,18678226 |  |
| 239750_x_at  | VAPA            | -2,64318869  | -2,456406426 | -0,18678226 |  |
| 240593_x_at  | -               | -2,64318869  | -2,456406426 | -0,18678226 |  |
| 241338_at    | -               | -2,64318869  | -2,456406426 | -0,18678226 |  |

|             |                     |              |              |             |  |
|-------------|---------------------|--------------|--------------|-------------|--|
| 200612_s_at | AP2B1               | 3,547344317  | 3,734161076  | -0,18681676 |  |
| 235603_at   | HNRNPU              | 0,246434561  | 0,433557298  | -0,18712274 |  |
| 238797_at   | TRIM11              | 0,246434561  | 0,433557298  | -0,18712274 |  |
| 229081_at   | SLC25A13            | 1,094335495  | 1,281471383  | -0,18713589 |  |
| 202466_at   | PAPD7               | 3,105247586  | 3,292527802  | -0,18728022 |  |
| 45653_at    | KCTD13              | 0,819921433  | 1,00729273   | -0,1873713  |  |
| 211538_s_at | HSPA2               | 1,940595304  | 2,127967638  | -0,18737233 |  |
| 206877_at   | MXD1                | -0,078265071 | 0,109221392  | -0,18748646 |  |
| 207216_at   | TNFSF8              | -0,078265071 | 0,109221392  | -0,18748646 |  |
| 213057_at   | ATPAF2              | -0,078265071 | 0,109221392  | -0,18748646 |  |
| 235621_at   | FAHD2A              | -0,078265071 | 0,109221392  | -0,18748646 |  |
| 238758_at   | -                   | -0,078265071 | 0,109221392  | -0,18748646 |  |
| 240840_s_at | SETD9               | -0,078265071 | 0,109221392  | -0,18748646 |  |
| 202316_x_at | UBE4B               | 0,95671774   | 1,144305291  | -0,18758755 |  |
| 210007_s_at | GPD2                | 0,95671774   | 1,144305291  | -0,18758755 |  |
| 38269_at    | PRKD2               | 2,879254447  | 3,066934992  | -0,18768054 |  |
| 221058_s_at | CKLF                | 3,812716554  | 4,00040886   | -0,18769231 |  |
| 203904_x_at | CD82                | 2,663141434  | 2,851017268  | -0,18787583 |  |
| 201105_at   | LGALS1              | 3,720873481  | 3,908790275  | -0,18791679 |  |
| 221494_x_at | EIF3K               | 6,538394565  | 6,726330314  | -0,18793575 |  |
| 214051_at   | TMSB15A /// TMSB15L | 1,454352496  | 1,642321262  | -0,18796877 |  |
| 214750_at   | PLAC4               | -0,234278768 | -0,046302147 | -0,18797662 |  |
| 230632_at   | LOC100288432        | -0,234278768 | -0,046302147 | -0,18797662 |  |
| 235271_s_at | ZNF397              | -0,234278768 | -0,046302147 | -0,18797662 |  |
| 236531_at   | -                   | -0,234278768 | -0,046302147 | -0,18797662 |  |
| 203653_s_at | COIL                | 1,210676994  | 1,398700978  | -0,18802398 |  |
| 212147_at   | SMG5                | 1,210676994  | 1,398700978  | -0,18802398 |  |
| 213989_x_at | SETD4               | 1,210676994  | 1,398700978  | -0,18802398 |  |
| 224678_at   | RALGAPB             | 1,210676994  | 1,398700978  | -0,18802398 |  |
| 227820_at   | TBC1D25             | 1,210676994  | 1,398700978  | -0,18802398 |  |
| 219067_s_at | NSMCE4A             | 3,755604375  | 3,943660335  | -0,18805596 |  |
| 202548_s_at | ARHGEF7             | 3,232262672  | 3,420331607  | -0,18806894 |  |
| 218237_s_at | SLC38A1             | 4,008926642  | 4,197041937  | -0,1881153  |  |
| 34187_at    | RBMS2               | 0,209623277  | 0,397791196  | -0,18816792 |  |
| 222761_at   | BIVM                | 1,823660386  | 2,011838132  | -0,18817775 |  |
| 207616_s_at | TANK                | 2,605861638  | 2,794067719  | -0,18820608 |  |
| 203917_at   | CXADR               | 0,401366113  | 0,589657387  | -0,18829127 |  |
| 223944_at   | NLRP12              | 0,401366113  | 0,589657387  | -0,18829127 |  |
| 213396_s_at | AKAP10              | 1,783520648  | 1,971855016  | -0,18833437 |  |
| 213079_at   | TSR2                | 2,915422315  | 3,103784293  | -0,18836198 |  |
| 243229_at   | -                   | 1,348276312  | 1,536652708  | -0,1883764  |  |
| 1552691_at  | ARL11               | -3,287237186 | -3,098858316 | -0,18837887 |  |
| 1552904_at  | NETO1               | -3,287237186 | -3,098858316 | -0,18837887 |  |
| 1553625_at  | FAM98B              | -3,287237186 | -3,098858316 | -0,18837887 |  |
| 214705_at   | INADL               | -3,287237186 | -3,098858316 | -0,18837887 |  |
| 215168_at   | TIMM17A             | -3,287237186 | -3,098858316 | -0,18837887 |  |
| 233304_at   | NFIB                | -3,287237186 | -3,098858316 | -0,18837887 |  |
| 234587_at   | -                   | -3,287237186 | -3,098858316 | -0,18837887 |  |
| 235527_at   | DLGAP1              | -3,287237186 | -3,098858316 | -0,18837887 |  |
| 237007_at   | -                   | -3,287237186 | -3,098858316 | -0,18837887 |  |
| 241979_x_at | -                   | -3,287237186 | -3,098858316 | -0,18837887 |  |
| 213112_s_at | SQSTM1              | 0,841135803  | 1,029536893  | -0,18840109 |  |
| 219378_at   | NAA16               | 3,367911651  | 3,556324192  | -0,18841254 |  |
| 212234_at   | ASXL1               | 1,593009234  | 1,781437557  | -0,18842832 |  |
| 205046_at   | CENPE               | 2,905386372  | 3,09388391   | -0,18849754 |  |
| 213160_at   | DOCK2               | 3,177319542  | 3,365837114  | -0,18851757 |  |

|              |                 |              |              |             |  |
|--------------|-----------------|--------------|--------------|-------------|--|
| 203692_s_at  | E2F3            | 3,492853048  | 3,681421378  | -0,18856833 |  |
| 200805_at    | LMAN2           | 4,103509368  | 4,292109123  | -0,18859975 |  |
| 218662_s_at  | NCAPG           | 3,545499171  | 3,734161076  | -0,18866191 |  |
| 224969_at    | ATXN7L3         | 1,699726954  | 1,888402606  | -0,18867565 |  |
| 219241_x_at  | SSH3            | 0,291166226  | 0,479907041  | -0,18874082 |  |
| 220009_at    | LONRF3          | 0,291166226  | 0,479907041  | -0,18874082 |  |
| 232098_at    | DST /// LOC1006 | 0,291166226  | 0,479907041  | -0,18874082 |  |
| 213043_s_at  | MED24           | 1,965648824  | 2,154405725  | -0,1887569  |  |
| 224746_at    | KIAA1522        | 1,965648824  | 2,154405725  | -0,1887569  |  |
| 221861_at    | ARRB1           | 2,082235068  | 2,271023131  | -0,18878806 |  |
| 1552750_at   | CIB3            | -2,597496523 | -2,408705138 | -0,18879139 |  |
| 1557233_at   | LOC285441       | -2,597496523 | -2,408705138 | -0,18879139 |  |
| 1558552_s_at | C3orf55         | -2,597496523 | -2,408705138 | -0,18879139 |  |
| 1558691_a_at | DOCK4           | -2,597496523 | -2,408705138 | -0,18879139 |  |
| 1559180_at   | LOC100131860    | -2,597496523 | -2,408705138 | -0,18879139 |  |
| 1561776_at   | -               | -2,597496523 | -2,408705138 | -0,18879139 |  |
| 1562750_at   | -               | -2,597496523 | -2,408705138 | -0,18879139 |  |
| 1565722_at   | -               | -2,597496523 | -2,408705138 | -0,18879139 |  |
| 1566511_at   | FBXO9           | -2,597496523 | -2,408705138 | -0,18879139 |  |
| 1570031_at   | -               | -2,597496523 | -2,408705138 | -0,18879139 |  |
| 208098_at    | OR12D3 /// OR5V | -2,597496523 | -2,408705138 | -0,18879139 |  |
| 210709_at    | ZC3H15          | -2,597496523 | -2,408705138 | -0,18879139 |  |
| 215646_s_at  | VCAN            | -2,597496523 | -2,408705138 | -0,18879139 |  |
| 223985_at    | FSD1L           | -2,597496523 | -2,408705138 | -0,18879139 |  |
| 234277_at    | -               | -2,597496523 | -2,408705138 | -0,18879139 |  |
| 235184_at    | AEBP2           | -2,597496523 | -2,408705138 | -0,18879139 |  |
| 235667_at    | USP46-AS1       | -2,597496523 | -2,408705138 | -0,18879139 |  |
| 236656_s_at  | LOC100288911    | -2,597496523 | -2,408705138 | -0,18879139 |  |
| 239167_at    | -               | -2,597496523 | -2,408705138 | -0,18879139 |  |
| 241295_at    | -               | -2,597496523 | -2,408705138 | -0,18879139 |  |
| 242445_at    | FGD4            | -2,597496523 | -2,408705138 | -0,18879139 |  |
| 242582_at    | -               | -2,597496523 | -2,408705138 | -0,18879139 |  |
| 243969_at    | SLC24A4         | -2,597496523 | -2,408705138 | -0,18879139 |  |
| 244787_at    | -               | -2,597496523 | -2,408705138 | -0,18879139 |  |
| 213008_at    | FANCI           | 2,644299732  | 2,833274877  | -0,18897515 |  |
| 201800_s_at  | OSBP            | 3,120200849  | 3,309203139  | -0,18900229 |  |
| 203555_at    | PTPN18          | 0,67554678   | 0,864649967  | -0,18910319 |  |
| 224868_at    | ZDHHC5          | 0,67554678   | 0,864649967  | -0,18910319 |  |
| 205602_x_at  | PSG7            | -0,325749314 | -0,136643983 | -0,18910533 |  |
| 210037_s_at  | NOS2            | -0,325749314 | -0,136643983 | -0,18910533 |  |
| 237467_at    | -               | -0,325749314 | -0,136643983 | -0,18910533 |  |
| 239869_at    | -               | -0,325749314 | -0,136643983 | -0,18910533 |  |
| 244408_at    | -               | -0,325749314 | -0,136643983 | -0,18910533 |  |
| 212537_x_at  | RPL17 /// RPL17 | 7,569780242  | 7,758914675  | -0,18913443 |  |
| 1553972_a_at | CBS             | 4,273659132  | 4,462889331  | -0,1892302  |  |
| 226519_s_at  | AGXT2L2         | 0,715481152  | 0,904843258  | -0,18936211 |  |
| 1556768_at   | LOC100144604    | -0,512251684 | -0,322870281 | -0,1893814  |  |
| 206998_x_at  | PRB3            | -0,512251684 | -0,322870281 | -0,1893814  |  |
| 224262_at    | IL1F10          | -0,512251684 | -0,322870281 | -0,1893814  |  |
| 239885_at    | -               | -0,512251684 | -0,322870281 | -0,1893814  |  |
| 219862_s_at  | NARF            | 4,016272785  | 4,205686812  | -0,18941403 |  |
| 200882_s_at  | PSMD4           | 4,635514003  | 4,8249493    | -0,1894353  |  |
| 219420_s_at  | SELRC1          | 2,516380342  | 2,705818724  | -0,18943838 |  |
| 217864_s_at  | PIAS1           | 2,562727117  | 2,752192409  | -0,18946529 |  |
| 209107_x_at  | NCOA1           | 1,889144008  | 2,078620836  | -0,18947683 |  |
| 203941_at    | INTS9           | 2,724770722  | 2,914267328  | -0,18949661 |  |

|              |                       |              |              |             |  |
|--------------|-----------------------|--------------|--------------|-------------|--|
| 227234_at    | LOC100132815          | 1,011212064  | 1,200746069  | -0,18953401 |  |
| 211444_at    | -                     | 0,228146222  | 0,417770464  | -0,18962424 |  |
| 237487_at    | -                     | 0,228146222  | 0,417770464  | -0,18962424 |  |
| 211783_s_at  | MTA1                  | 3,249366227  | 3,439026336  | -0,18966011 |  |
| 225689_at    | GTDC2                 | 2,763383302  | 2,953119918  | -0,18973662 |  |
| 225771_at    | AP1G1                 | 3,611363461  | 3,801102381  | -0,18973892 |  |
| 1553562_at   | CD8B                  | -1,240169874 | -1,050406615 | -0,18976326 |  |
| 1555042_at   | TRPV5                 | -1,240169874 | -1,050406615 | -0,18976326 |  |
| 1556771_a_at | LOC415056             | -1,240169874 | -1,050406615 | -0,18976326 |  |
| 1563043_at   | LOC285375             | -1,240169874 | -1,050406615 | -0,18976326 |  |
| 203191_at    | ABCB6                 | -1,240169874 | -1,050406615 | -0,18976326 |  |
| 203305_at    | F13A1                 | -1,240169874 | -1,050406615 | -0,18976326 |  |
| 206025_s_at  | TNFAIP6               | -1,240169874 | -1,050406615 | -0,18976326 |  |
| 216341_s_at  | GNRHR                 | -1,240169874 | -1,050406615 | -0,18976326 |  |
| 220374_at    | KLHL28                | -1,240169874 | -1,050406615 | -0,18976326 |  |
| 229166_s_at  | GATAD2A               | -1,240169874 | -1,050406615 | -0,18976326 |  |
| 236082_at    | PHLDB3                | -1,240169874 | -1,050406615 | -0,18976326 |  |
| 238498_at    | -                     | -1,240169874 | -1,050406615 | -0,18976326 |  |
| 238690_at    | -                     | -1,240169874 | -1,050406615 | -0,18976326 |  |
| 239473_x_at  | MAP6D1                | -1,240169874 | -1,050406615 | -0,18976326 |  |
| 239609_s_at  | LPCAT4                | -1,240169874 | -1,050406615 | -0,18976326 |  |
| 241398_at    | -                     | -1,240169874 | -1,050406615 | -0,18976326 |  |
| 242500_at    | -                     | -1,240169874 | -1,050406615 | -0,18976326 |  |
| 228454_at    | LCOR                  | 2,840652551  | 3,030417996  | -0,18976545 |  |
| 1558487_a_at | TMED4                 | 1,868628927  | 2,058399602  | -0,18977067 |  |
| 221745_at    | DCAF7                 | 1,868628927  | 2,058399602  | -0,18977067 |  |
| 1559705_s_at | PHKA2                 | 0,627515113  | 0,817300337  | -0,18978522 |  |
| 211260_at    | BMP7                  | 0,627515113  | 0,817300337  | -0,18978522 |  |
| 228649_at    | NOTUM                 | 0,627515113  | 0,817300337  | -0,18978522 |  |
| 244552_at    | ZNF788                | 3,363729238  | 3,553617909  | -0,18988867 |  |
| 202421_at    | IGSF3                 | 2,752227654  | 2,942125533  | -0,18989788 |  |
| 226085_at    | CBX5                  | 4,097854871  | 4,287773079  | -0,18991821 |  |
| 1556180_at   | LOC729678             | 0,810733188  | 1,000684521  | -0,18995133 |  |
| 227652_at    | FAM69B                | 0,810733188  | 1,000684521  | -0,18995133 |  |
| 205010_at    | GNL3L                 | 2,604089881  | 2,794067719  | -0,18997784 |  |
| 226651_at    | HOMER1                | 2,438982012  | 2,629059192  | -0,19007718 |  |
| 236951_at    | NSFL1C                | 1,104397092  | 1,294497133  | -0,19010004 |  |
| 232996_at    | CCDC120               | 0,103263601  | 0,293518836  | -0,19025523 |  |
| 243955_at    | -                     | 0,103263601  | 0,293518836  | -0,19025523 |  |
| 209760_at    | KIAA0922              | 2,022468633  | 2,212749286  | -0,19028065 |  |
| 35685_at     | RING1                 | 3,306591623  | 3,496990091  | -0,19039847 |  |
| 208174_x_at  | ZRSR2                 | 1,485482016  | 1,675891488  | -0,19040947 |  |
| 228664_at    | LOC100507602          | 1,485482016  | 1,675891488  | -0,19040947 |  |
| 223909_s_at  | HDAC8                 | 0,900083947  | 1,090553537  | -0,19046959 |  |
| 225121_at    | TBC1D23               | 4,155242648  | 4,345759456  | -0,19051681 |  |
| 201434_at    | TTC1                  | 3,537166687  | 3,727773127  | -0,19060644 |  |
| 212401_s_at  | CDK11A /// CDK1       | 3,248232277  | 3,439026336  | -0,19079406 |  |
| 208076_at    | HIST1H4A /// HIST1H4A | 1,575032557  | 1,765933685  | -0,19090113 |  |
| 210463_x_at  | TRMT1                 | 3,042527069  | 3,233443554  | -0,19091648 |  |
| 221419_s_at  | -                     | 1,683039483  | 1,874012195  | -0,19097271 |  |
| 1569484_s_at | MDN1                  | -0,033456564 | 0,157549243  | -0,19100581 |  |
| 209730_at    | SEMA3F                | -0,033456564 | 0,157549243  | -0,19100581 |  |
| 213560_at    | GADD45B               | -0,033456564 | 0,157549243  | -0,19100581 |  |
| 232259_s_at  | LOC100009676          | -0,033456564 | 0,157549243  | -0,19100581 |  |
| 233384_at    | -                     | -0,033456564 | 0,157549243  | -0,19100581 |  |
| 202099_s_at  | DGCR2                 | 1,000476627  | 1,191491281  | -0,19101465 |  |

|              |                 |              |              |             |  |
|--------------|-----------------|--------------|--------------|-------------|--|
| 205161_s_at  | PEX11A          | 0,480753764  | 0,67181667   | -0,19106291 |  |
| 210694_s_at  | MID1            | 0,480753764  | 0,67181667   | -0,19106291 |  |
| 221617_at    | TAF9B           | 0,480753764  | 0,67181667   | -0,19106291 |  |
| 222368_at    | -               | 0,480753764  | 0,67181667   | -0,19106291 |  |
| 223458_at    | SEZ6L2          | 0,480753764  | 0,67181667   | -0,19106291 |  |
| 213073_at    | ZFYVE26         | 2,166283906  | 2,357351836  | -0,19106793 |  |
| 226496_at    | ZCCHC7          | 3,000043914  | 3,191118448  | -0,19107453 |  |
| 200984_s_at  | CD59            | 3,480351894  | 3,671470423  | -0,19111853 |  |
| 211000_s_at  | IL6ST           | 0,702292136  | 0,893473268  | -0,19118113 |  |
| 227739_at    | NDOR1           | 1,187200746  | 1,378453643  | -0,1912529  |  |
| 205045_at    | AKAP10          | 0,03125738   | 0,222599095  | -0,19134171 |  |
| 232974_at    | -               | 0,03125738   | 0,222599095  | -0,19134171 |  |
| 234445_at    | ZNRD1-AS1       | 0,03125738   | 0,222599095  | -0,19134171 |  |
| 202910_s_at  | CD97            | 3,513765154  | 3,705189898  | -0,19142474 |  |
| 202962_at    | KIF13B          | 1,780386218  | 1,971855016  | -0,1914688  |  |
| 203363_s_at  | ATG13           | 1,780386218  | 1,971855016  | -0,1914688  |  |
| 213737_x_at  | GOLGA8IP        | 2,808702036  | 3,000258961  | -0,19155693 |  |
| 223414_s_at  | LYAR            | 2,808702036  | 3,000258961  | -0,19155693 |  |
| 201618_x_at  | GPAA1           | 3,304956562  | 3,496520471  | -0,19156391 |  |
| 1560258_a_at | -               | 0,962260738  | 1,153866761  | -0,19160602 |  |
| 220192_x_at  | SPDEF           | 0,962260738  | 1,153866761  | -0,19160602 |  |
| 226306_at    | C6orf1          | 0,962260738  | 1,153866761  | -0,19160602 |  |
| 235022_at    | FAM210A         | 2,402750389  | 2,594367918  | -0,19161753 |  |
| 223281_s_at  | COX15           | 2,139623739  | 2,331254065  | -0,19163033 |  |
| 213015_at    | BBX             | 1,269985355  | 1,461646549  | -0,19166119 |  |
| 232007_at    | AGPAT5          | 2,688444421  | 2,880111483  | -0,19166706 |  |
| 202429_s_at  | PPP3CA          | 3,591828571  | 3,783501543  | -0,19167297 |  |
| 214720_x_at  | 40422           | 0,376672223  | 0,568365095  | -0,19169287 |  |
| 224121_x_at  | PLEKHB2         | 0,376672223  | 0,568365095  | -0,19169287 |  |
| 242966_x_at  | -               | 0,376672223  | 0,568365095  | -0,19169287 |  |
| 209148_at    | RXRB            | 2,310153708  | 2,501934108  | -0,1917804  |  |
| 210715_s_at  | SPINT2          | 5,009002385  | 5,200859636  | -0,19185725 |  |
| 1555827_at   | CCNL1           | -1,047650486 | -0,855751026 | -0,19189946 |  |
| 1557483_at   | LOC284788       | -1,047650486 | -0,855751026 | -0,19189946 |  |
| 1562261_at   | AMZ1            | -1,047650486 | -0,855751026 | -0,19189946 |  |
| 1562818_at   | NMNAT2          | -1,047650486 | -0,855751026 | -0,19189946 |  |
| 204452_s_at  | FZD1            | -1,047650486 | -0,855751026 | -0,19189946 |  |
| 211514_at    | DSTYK           | -1,047650486 | -0,855751026 | -0,19189946 |  |
| 215652_at    | SDHD            | -1,047650486 | -0,855751026 | -0,19189946 |  |
| 215920_s_at  | NPIPL3 /// PDXD | -1,047650486 | -0,855751026 | -0,19189946 |  |
| 216787_at    | -               | -1,047650486 | -0,855751026 | -0,19189946 |  |
| 222002_at    | C7orf26         | -1,047650486 | -0,855751026 | -0,19189946 |  |
| 224074_at    | VSX1            | -1,047650486 | -0,855751026 | -0,19189946 |  |
| 226865_at    | LOC100509635    | -1,047650486 | -0,855751026 | -0,19189946 |  |
| 231034_s_at  | -               | -1,047650486 | -0,855751026 | -0,19189946 |  |
| 238038_at    | -               | -1,047650486 | -0,855751026 | -0,19189946 |  |
| 242210_at    | ZNF24           | -1,047650486 | -0,855751026 | -0,19189946 |  |
| 223223_at    | ARV1            | 3,617524043  | 3,809444866  | -0,19192082 |  |
| 217765_at    | NRBP1           | 2,696781084  | 2,888726553  | -0,19194547 |  |
| 204267_x_at  | PKMYT1          | 2,281618189  | 2,473581079  | -0,19196289 |  |
| 203239_s_at  | CNOT3           | 0,888485433  | 1,080561626  | -0,19207619 |  |
| 223939_at    | SUCNR1          | 0,888485433  | 1,080561626  | -0,19207619 |  |
| 1555478_at   | C17orf82        | 1,238353345  | 1,43051703   | -0,19216369 |  |
| 1556653_at   | ANKAR           | -2,972500237 | -2,780313924 | -0,19218631 |  |
| 1560184_at   | TMCO5A          | -2,972500237 | -2,780313924 | -0,19218631 |  |
| 1560733_at   | ALG5            | -2,972500237 | -2,780313924 | -0,19218631 |  |

|              |                |              |              |             |  |
|--------------|----------------|--------------|--------------|-------------|--|
| 1560833_at   | LOC643648      | -2,972500237 | -2,780313924 | -0,19218631 |  |
| 1561158_at   | -              | -2,972500237 | -2,780313924 | -0,19218631 |  |
| 1561255_at   | -              | -2,972500237 | -2,780313924 | -0,19218631 |  |
| 1562112_at   | -              | -2,972500237 | -2,780313924 | -0,19218631 |  |
| 1562470_at   | TCEANC2        | -2,972500237 | -2,780313924 | -0,19218631 |  |
| 1562863_at   | -              | -2,972500237 | -2,780313924 | -0,19218631 |  |
| 1563373_at   | LOC731223      | -2,972500237 | -2,780313924 | -0,19218631 |  |
| 1566437_at   | -              | -2,972500237 | -2,780313924 | -0,19218631 |  |
| 1568660_a_at | LOC100506172   | -2,972500237 | -2,780313924 | -0,19218631 |  |
| 1570622_at   | -              | -2,972500237 | -2,780313924 | -0,19218631 |  |
| 215074_at    | MYO1B          | -2,972500237 | -2,780313924 | -0,19218631 |  |
| 217552_x_at  | CR1            | -2,972500237 | -2,780313924 | -0,19218631 |  |
| 220393_at    | LGSN           | -2,972500237 | -2,780313924 | -0,19218631 |  |
| 228962_at    | PDE4D          | -2,972500237 | -2,780313924 | -0,19218631 |  |
| 232204_at    | EBF1           | -2,972500237 | -2,780313924 | -0,19218631 |  |
| 232993_at    | SYNJ1          | -2,972500237 | -2,780313924 | -0,19218631 |  |
| 238376_at    | LOC100505564   | -2,972500237 | -2,780313924 | -0,19218631 |  |
| 240688_at    | MGST1          | -2,972500237 | -2,780313924 | -0,19218631 |  |
| 241649_at    | -              | -2,972500237 | -2,780313924 | -0,19218631 |  |
| 242667_at    | -              | -2,972500237 | -2,780313924 | -0,19218631 |  |
| 243984_at    | -              | -2,972500237 | -2,780313924 | -0,19218631 |  |
| 1556766_at   | ERICH1         | -0,112808516 | 0,079428135  | -0,19223665 |  |
| 202247_s_at  | MTA1           | -0,112808516 | 0,079428135  | -0,19223665 |  |
| 217276_x_at  | SERHL2         | -0,112808516 | 0,079428135  | -0,19223665 |  |
| 218999_at    | TMEM140        | -0,112808516 | 0,079428135  | -0,19223665 |  |
| 239074_at    | GRAPL          | -0,112808516 | 0,079428135  | -0,19223665 |  |
| 244497_at    | LOC100652740 / | -0,112808516 | 0,079428135  | -0,19223665 |  |
| 224632_at    | GPATCH4        | 2,410880861  | 2,603119255  | -0,19223839 |  |
| 231963_at    | ANKRD33B       | 1,422536444  | 1,614891062  | -0,19235462 |  |
| 204698_at    | ISG20          | 1,973904239  | 2,166264721  | -0,19236048 |  |
| 203704_s_at  | RREB1          | 4,294682191  | 4,487202792  | -0,1925206  |  |
| 225779_at    | SLC27A4        | 1,177702228  | 1,370274469  | -0,19257224 |  |
| 219175_s_at  | SLC41A3        | 1,021868205  | 1,214517879  | -0,19264967 |  |
| 239225_at    | -              | 1,493160564  | 1,685812099  | -0,19265154 |  |
| 229322_at    | PPP2R5E        | 3,941773349  | 4,13442882   | -0,19265547 |  |
| 1554482_a_at | SAR1B          | 2,963199262  | 3,155865206  | -0,19266594 |  |
| 226557_at    | TTC5           | 2,220484971  | 2,413157372  | -0,1926724  |  |
| 219678_x_at  | DCLRE1C        | 1,954567604  | 2,147243253  | -0,19267565 |  |
| 1558248_at   | GOLM1          | -0,759588698 | -0,566887459 | -0,19270124 |  |
| 1562028_at   | CCND3          | -0,759588698 | -0,566887459 | -0,19270124 |  |
| 1562303_at   | ZKSCAN3        | -0,759588698 | -0,566887459 | -0,19270124 |  |
| 1566156_at   | -              | -0,759588698 | -0,566887459 | -0,19270124 |  |
| 1570085_at   | LOC100506679   | -0,759588698 | -0,566887459 | -0,19270124 |  |
| 221716_s_at  | ACSBG2         | -0,759588698 | -0,566887459 | -0,19270124 |  |
| 222307_at    | LOC282997      | -0,759588698 | -0,566887459 | -0,19270124 |  |
| 223837_at    | GULP1          | -0,759588698 | -0,566887459 | -0,19270124 |  |
| 227618_at    | -              | -0,759588698 | -0,566887459 | -0,19270124 |  |
| 231457_at    | -              | -0,759588698 | -0,566887459 | -0,19270124 |  |
| 235066_at    | MAP4           | -0,759588698 | -0,566887459 | -0,19270124 |  |
| 241839_at    | -              | -0,759588698 | -0,566887459 | -0,19270124 |  |
| 206348_s_at  | PDK3           | 1,369290453  | 1,562009954  | -0,1927195  |  |
| 224301_x_at  | H2AFJ          | 4,041366364  | 4,234134575  | -0,19276821 |  |
| 1553600_at   | TMIE           | -0,352951799 | -0,160136748 | -0,19281505 |  |
| 1553720_a_at | FAM123A        | -0,352951799 | -0,160136748 | -0,19281505 |  |
| 1567627_at   | CD74           | -0,352951799 | -0,160136748 | -0,19281505 |  |
| 202180_s_at  | MVP            | -0,352951799 | -0,160136748 | -0,19281505 |  |

|              |              |              |              |             |  |
|--------------|--------------|--------------|--------------|-------------|--|
| 206659_at    | -            | -0,352951799 | -0,160136748 | -0,19281505 |  |
| 209917_s_at  | TP53TG1      | -0,352951799 | -0,160136748 | -0,19281505 |  |
| 232933_at    | KIAA1656     | -0,352951799 | -0,160136748 | -0,19281505 |  |
| 237300_at    | PSMA3        | -0,352951799 | -0,160136748 | -0,19281505 |  |
| 238655_at    | ACAD10       | -0,352951799 | -0,160136748 | -0,19281505 |  |
| 239122_at    | -            | -0,352951799 | -0,160136748 | -0,19281505 |  |
| 218847_at    | IGF2BP2      | 3,107750584  | 3,300620584  | -0,19287    |  |
| 224445_s_at  | ZFYVE21      | 3,877954598  | 4,070868415  | -0,19291382 |  |
| 214959_s_at  | API5         | 2,114952142  | 2,307890888  | -0,19293875 |  |
| 117_at       | HSPA6        | 1,003167985  | 1,196126096  | -0,19295811 |  |
| 225274_at    | PCYOX1       | 3,091402928  | 3,284389368  | -0,19298644 |  |
| 212613_at    | BTN3A2       | 2,525769574  | 2,718761062  | -0,19299149 |  |
| 1552474_a_at | GAMT         | 1,603688695  | 1,796776588  | -0,19308789 |  |
| 205981_s_at  | ING2         | 2,807162789  | 3,000258961  | -0,19309617 |  |
| 234290_x_at  | MYH14        | 1,46610492   | 1,659204017  | -0,1930991  |  |
| 211950_at    | UBR4         | 3,121439986  | 3,314541423  | -0,19310144 |  |
| 231431_s_at  | LOC100505573 | 2,259277178  | 2,452428893  | -0,19315172 |  |
| 214010_s_at  | ATP9B        | 0,728550685  | 0,921731975  | -0,19318129 |  |
| 225201_s_at  | MRPL14       | 5,288138786  | 5,481335109  | -0,19319632 |  |
| 203942_s_at  | MARK2        | 0,46522187   | 0,658444279  | -0,19322241 |  |
| 228783_at    | BVES         | 0,46522187   | 0,658444279  | -0,19322241 |  |
| 200072_s_at  | HNRNPM       | 6,023197054  | 6,216446059  | -0,19324901 |  |
| 1559661_at   | ODZ3         | -2,479842156 | -2,286583451 | -0,19325871 |  |
| 1560769_at   | -            | -2,479842156 | -2,286583451 | -0,19325871 |  |
| 1561324_at   | -            | -2,479842156 | -2,286583451 | -0,19325871 |  |
| 1562568_at   | LOC400541    | -2,479842156 | -2,286583451 | -0,19325871 |  |
| 1563174_at   | -            | -2,479842156 | -2,286583451 | -0,19325871 |  |
| 205113_at    | NEFM         | -2,479842156 | -2,286583451 | -0,19325871 |  |
| 206101_at    | ECM2         | -2,479842156 | -2,286583451 | -0,19325871 |  |
| 207534_at    | MAGEB1       | -2,479842156 | -2,286583451 | -0,19325871 |  |
| 210370_s_at  | LY9          | -2,479842156 | -2,286583451 | -0,19325871 |  |
| 210409_at    | MLLT4-AS1    | -2,479842156 | -2,286583451 | -0,19325871 |  |
| 216368_s_at  | COL4A3       | -2,479842156 | -2,286583451 | -0,19325871 |  |
| 216728_at    | -            | -2,479842156 | -2,286583451 | -0,19325871 |  |
| 216783_at    | -            | -2,479842156 | -2,286583451 | -0,19325871 |  |
| 226933_s_at  | ID4          | -2,479842156 | -2,286583451 | -0,19325871 |  |
| 235651_at    | TTC22        | -2,479842156 | -2,286583451 | -0,19325871 |  |
| 236338_at    | -            | -2,479842156 | -2,286583451 | -0,19325871 |  |
| 237219_at    | PHKA1-AS1    | -2,479842156 | -2,286583451 | -0,19325871 |  |
| 237258_at    | -            | -2,479842156 | -2,286583451 | -0,19325871 |  |
| 237924_at    | -            | -2,479842156 | -2,286583451 | -0,19325871 |  |
| 205733_at    | BLM          | 2,737756747  | 2,93104672   | -0,19328997 |  |
| 217885_at    | IPO9         | 2,861566439  | 3,05486507   | -0,19329863 |  |
| 223004_s_at  | TIMMDC1      | 4,663430187  | 4,85676571   | -0,19333552 |  |
| 1557721_at   | -            | -1,688127507 | -1,494668682 | -0,19345883 |  |
| 1559458_at   | LTBR         | -1,688127507 | -1,494668682 | -0,19345883 |  |
| 1560291_at   | RIPPLY1      | -1,688127507 | -1,494668682 | -0,19345883 |  |
| 1560503_a_at | LOC100130275 | -1,688127507 | -1,494668682 | -0,19345883 |  |
| 1562273_at   | CNGA4        | -1,688127507 | -1,494668682 | -0,19345883 |  |
| 1564027_a_at | FAM115C      | -1,688127507 | -1,494668682 | -0,19345883 |  |
| 1565700_at   | -            | -1,688127507 | -1,494668682 | -0,19345883 |  |
| 201467_s_at  | NQO1         | -1,688127507 | -1,494668682 | -0,19345883 |  |
| 208482_at    | SSTR1        | -1,688127507 | -1,494668682 | -0,19345883 |  |
| 214994_at    | APOBEC3F     | -1,688127507 | -1,494668682 | -0,19345883 |  |
| 215624_at    | TSC2         | -1,688127507 | -1,494668682 | -0,19345883 |  |
| 216419_at    | CROCC        | -1,688127507 | -1,494668682 | -0,19345883 |  |

|              |                |              |              |             |  |
|--------------|----------------|--------------|--------------|-------------|--|
| 232421_at    | SCARB1         | -1,688127507 | -1,494668682 | -0,19345883 |  |
| 232832_at    | DKFZp434J0226  | -1,688127507 | -1,494668682 | -0,19345883 |  |
| 235560_at    | NOVA2          | -1,688127507 | -1,494668682 | -0,19345883 |  |
| 236616_at    | -              | -1,688127507 | -1,494668682 | -0,19345883 |  |
| 239123_at    | TSC22D1        | -1,688127507 | -1,494668682 | -0,19345883 |  |
| 239325_at    | DNAJC27-AS1    | -1,688127507 | -1,494668682 | -0,19345883 |  |
| 239397_at    | ARHGEF7        | -1,688127507 | -1,494668682 | -0,19345883 |  |
| 241797_at    | -              | -1,688127507 | -1,494668682 | -0,19345883 |  |
| 1555617_x_at | -              | -0,543051993 | -0,34958478  | -0,19346721 |  |
| 1557008_at   | LOC340107      | -0,543051993 | -0,34958478  | -0,19346721 |  |
| 203548_s_at  | LPL            | -0,543051993 | -0,34958478  | -0,19346721 |  |
| 206258_at    | ST8SIA5        | -0,543051993 | -0,34958478  | -0,19346721 |  |
| 219991_at    | SLC2A9         | -0,543051993 | -0,34958478  | -0,19346721 |  |
| 220629_at    | KCNQ1DN        | -0,543051993 | -0,34958478  | -0,19346721 |  |
| 231854_at    | PIK3CA         | -0,543051993 | -0,34958478  | -0,19346721 |  |
| 232592_at    | -              | -0,543051993 | -0,34958478  | -0,19346721 |  |
| 233585_at    | SDK2           | -0,543051993 | -0,34958478  | -0,19346721 |  |
| 209280_at    | MRC2           | 0,20027154   | 0,393761504  | -0,19348996 |  |
| 211331_x_at  | HFE            | 0,20027154   | 0,393761504  | -0,19348996 |  |
| 219881_s_at  | LOC100507619   | 0,20027154   | 0,393761504  | -0,19348996 |  |
| 212677_s_at  | CEP68          | 1,079110292  | 1,272721751  | -0,19361146 |  |
| 214901_at    | ZNF8           | 1,764611101  | 1,958277216  | -0,19366612 |  |
| 222986_s_at  | SHISA5         | 3,663333942  | 3,857048799  | -0,19371486 |  |
| 208879_x_at  | PRPF6          | 2,520143371  | 2,713921281  | -0,19377791 |  |
| 235944_at    | HMCN1          | 1,722769813  | 1,916759838  | -0,19399002 |  |
| 214467_at    | GPR65          | 0,359971644  | 0,553993624  | -0,19402198 |  |
| 223293_at    | WDR24          | 0,359971644  | 0,553993624  | -0,19402198 |  |
| 226286_at    | ELMOD3         | 0,359971644  | 0,553993624  | -0,19402198 |  |
| 228757_at    | HSD11B1L       | 0,359971644  | 0,553993624  | -0,19402198 |  |
| 209285_s_at  | FAM208A        | 1,224581536  | 1,418668082  | -0,19408655 |  |
| 219544_at    | BORA           | 2,35929703   | 2,553413592  | -0,19411656 |  |
| 209336_at    | PWP2           | 4,792721453  | 4,986839697  | -0,19411824 |  |
| 225204_at    | PPTC7          | 2,845159691  | 3,039473081  | -0,19431339 |  |
| 200981_x_at  | GNAS           | 6,515484466  | 6,709814308  | -0,19432984 |  |
| 1557114_a_at | LOC284385      | -0,655928373 | -0,461594427 | -0,19433395 |  |
| 205447_s_at  | MAP3K12        | -0,655928373 | -0,461594427 | -0,19433395 |  |
| 231743_at    | WNT3           | -0,655928373 | -0,461594427 | -0,19433395 |  |
| 236997_at    | LOC100505554   | -0,655928373 | -0,461594427 | -0,19433395 |  |
| 204759_at    | RCBTB2         | 5,059330919  | 5,2537823    | -0,19445138 |  |
| 219142_at    | RASL11B        | 1,549482847  | 1,743944487  | -0,19446164 |  |
| 1568611_at   | -              | 0,072842263  | 0,26733076   | -0,1944885  |  |
| 205223_at    | DEPDC5         | 0,072842263  | 0,26733076   | -0,1944885  |  |
| 214310_s_at  | ZFPL1          | 0,072842263  | 0,26733076   | -0,1944885  |  |
| 235827_at    | LOC100506472 / | 0,072842263  | 0,26733076   | -0,1944885  |  |
| 238572_at    | STK16          | 0,072842263  | 0,26733076   | -0,1944885  |  |
| 224471_s_at  | BTRC           | 2,758612869  | 2,953119918  | -0,19450705 |  |
| 217135_x_at  | -              | 0,87091093   | 1,065442793  | -0,19453186 |  |
| 203951_at    | CNN1           | 2,178241192  | 2,372786857  | -0,19454567 |  |
| 225190_x_at  | RPL35A         | 6,946551312  | 7,141135643  | -0,19458433 |  |
| 229748_x_at  | LOC100233156 / | 3,024094427  | 3,218713651  | -0,19461922 |  |
| 230004_at    | USP24          | 0,592200562  | 0,786897721  | -0,19469716 |  |
| 225427_s_at  | APOA1BP        | 3,85579038   | 4,050537457  | -0,19474708 |  |
| 1553438_at   | C11orf72       | 1,247462054  | 1,442269454  | -0,1948074  |  |
| 202791_s_at  | PPP6R2         | 0,97328325   | 1,16809119   | -0,19480794 |  |
| 224559_at    | LOC100507645 / | 0,97328325   | 1,16809119   | -0,19480794 |  |
| 232809_s_at  | FLT1           | 0,97328325   | 1,16809119   | -0,19480794 |  |



|              |              |              |              |             |  |
|--------------|--------------|--------------|--------------|-------------|--|
| 213321_at    | BCKDHB       | 1,274448124  | 1,469325098  | -0,19487697 |  |
| 1559685_at   | LOC100506379 | -2,930741289 | -2,735862426 | -0,19487886 |  |
| 1561215_at   | -            | -2,930741289 | -2,735862426 | -0,19487886 |  |
| 1562919_at   | FAM45A       | -2,930741289 | -2,735862426 | -0,19487886 |  |
| 1563241_at   | -            | -2,930741289 | -2,735862426 | -0,19487886 |  |
| 1569078_at   | LOC100294362 | -2,930741289 | -2,735862426 | -0,19487886 |  |
| 1569600_at   | DLEU2        | -2,930741289 | -2,735862426 | -0,19487886 |  |
| 1570117_at   | -            | -2,930741289 | -2,735862426 | -0,19487886 |  |
| 1570222_at   | NDST4        | -2,930741289 | -2,735862426 | -0,19487886 |  |
| 210703_at    | -            | -2,930741289 | -2,735862426 | -0,19487886 |  |
| 214606_at    | TSPAN2       | -2,930741289 | -2,735862426 | -0,19487886 |  |
| 231029_at    | F5           | -2,930741289 | -2,735862426 | -0,19487886 |  |
| 238281_at    | -            | -2,930741289 | -2,735862426 | -0,19487886 |  |
| 238398_s_at  | -            | -2,930741289 | -2,735862426 | -0,19487886 |  |
| 240081_at    | -            | -2,930741289 | -2,735862426 | -0,19487886 |  |
| 242375_x_at  | PAH          | -2,930741289 | -2,735862426 | -0,19487886 |  |
| 244510_at    | -            | -2,930741289 | -2,735862426 | -0,19487886 |  |
| 242794_at    | MAML3        | 1,735773781  | 1,930732138  | -0,19495836 |  |
| 217779_s_at  | PNRC2        | 4,915664747  | 5,110759903  | -0,19509516 |  |
| 200744_s_at  | GNB1         | 3,962664437  | 4,157782885  | -0,19511845 |  |
| 209510_at    | RNF139       | 4,855129945  | 5,050289902  | -0,19515996 |  |
| 223635_s_at  | SSBP3        | 0,792179257  | 0,987376598  | -0,19519734 |  |
| 221255_s_at  | EMC6         | 4,198742362  | 4,393960186  | -0,19521782 |  |
| 201127_s_at  | ACLY         | 2,450859799  | 2,646096941  | -0,19523714 |  |
| 203288_at    | KIAA0355     | 3,27186005   | 3,467101363  | -0,19524131 |  |
| 1554300_a_at | SVOPL        | -1,308181863 | -1,112851844 | -0,19533002 |  |
| 1557196_a_at | -            | -1,308181863 | -1,112851844 | -0,19533002 |  |
| 206249_at    | MAP3K13      | -1,308181863 | -1,112851844 | -0,19533002 |  |
| 216078_at    | -            | -1,308181863 | -1,112851844 | -0,19533002 |  |
| 228165_at    | C12orf53     | -1,308181863 | -1,112851844 | -0,19533002 |  |
| 229888_at    | C12orf60     | -1,308181863 | -1,112851844 | -0,19533002 |  |
| 230040_at    | ADAMTS18     | -1,308181863 | -1,112851844 | -0,19533002 |  |
| 231407_s_at  | FOXH1        | -1,308181863 | -1,112851844 | -0,19533002 |  |
| 232546_at    | TP73         | -1,308181863 | -1,112851844 | -0,19533002 |  |
| 240877_x_at  | -            | -1,308181863 | -1,112851844 | -0,19533002 |  |
| 240935_at    | -            | -1,308181863 | -1,112851844 | -0,19533002 |  |
| 241420_at    | -            | -1,308181863 | -1,112851844 | -0,19533002 |  |
| 243509_at    | -            | -1,308181863 | -1,112851844 | -0,19533002 |  |
| 222788_s_at  | RSBN1        | 1,496984567  | 1,692388143  | -0,19540358 |  |
| 1564603_at   | C15orf55     | -0,136301282 | 0,059218869  | -0,19552015 |  |
| 209610_s_at  | SLC1A4       | -0,136301282 | 0,059218869  | -0,19552015 |  |
| 235500_at    | HNRNPC       | -0,136301282 | 0,059218869  | -0,19552015 |  |
| 237620_at    | ODF3L2       | -0,136301282 | 0,059218869  | -0,19552015 |  |
| 238979_at    | LOC100505606 | -0,136301282 | 0,059218869  | -0,19552015 |  |
| 214058_at    | MYCL1        | 0,496120222  | 0,691645685  | -0,19552546 |  |
| 242515_x_at  | AKIP1        | 2,001086023  | 2,196649505  | -0,19556348 |  |
| 226054_at    | BRD4         | 3,111496958  | 3,307062282  | -0,19556532 |  |
| 213312_at    | C6orf162     | 1,58584542   | 1,781437557  | -0,19559214 |  |
| 234725_s_at  | SEMA4B       | 1,58584542   | 1,781437557  | -0,19559214 |  |
| 215294_s_at  | SMARCA1      | 0,541261317  | 0,73688026   | -0,19561894 |  |
| 1555844_s_at | HNRNPM       | 6,219818999  | 6,41563024   | -0,19581124 |  |
| 226589_at    | TMEM192      | 1,446464021  | 1,642321262  | -0,19585724 |  |
| 209316_s_at  | HBS1L        | 5,206127244  | 5,402063278  | -0,19593603 |  |
| 203896_s_at  | PLCB4        | 1,153678675  | 1,349621332  | -0,19594266 |  |
| 203195_s_at  | NUP98        | 2,371846398  | 2,567790814  | -0,19594442 |  |
| 228059_x_at  | MRPS22       | 4,100370717  | 4,296432174  | -0,19606146 |  |

|              |                  |              |              |             |  |
|--------------|------------------|--------------|--------------|-------------|--|
| 1552499_a_at | ZSCAN20          | -0,926850548 | -0,730778808 | -0,19607174 |  |
| 1554205_s_at | ICA1L            | -0,926850548 | -0,730778808 | -0,19607174 |  |
| 1555416_a_at | ALOX15B          | -0,926850548 | -0,730778808 | -0,19607174 |  |
| 1557238_s_at | -                | -0,926850548 | -0,730778808 | -0,19607174 |  |
| 1562689_at   | LOC151484        | -0,926850548 | -0,730778808 | -0,19607174 |  |
| 1564399_a_at | ARMCX4           | -0,926850548 | -0,730778808 | -0,19607174 |  |
| 1569730_at   | HEATR7B2         | -0,926850548 | -0,730778808 | -0,19607174 |  |
| 215526_at    | -                | -0,926850548 | -0,730778808 | -0,19607174 |  |
| 217002_s_at  | HTR3A            | -0,926850548 | -0,730778808 | -0,19607174 |  |
| 230924_at    | TTLL6            | -0,926850548 | -0,730778808 | -0,19607174 |  |
| 231172_at    | C9orf117         | -0,926850548 | -0,730778808 | -0,19607174 |  |
| 232938_at    | SFMBT2           | -0,926850548 | -0,730778808 | -0,19607174 |  |
| 234451_at    | -                | -0,926850548 | -0,730778808 | -0,19607174 |  |
| 236142_at    | -                | -0,926850548 | -0,730778808 | -0,19607174 |  |
| 237244_at    | LOC100506769     | -0,926850548 | -0,730778808 | -0,19607174 |  |
| 243074_at    | -                | -0,926850548 | -0,730778808 | -0,19607174 |  |
| 243388_at    | -                | -0,926850548 | -0,730778808 | -0,19607174 |  |
| 243476_at    | NF1              | -0,926850548 | -0,730778808 | -0,19607174 |  |
| 1552484_at   | SMCR8            | 0,181384709  | 0,377530647  | -0,19614594 |  |
| 1560536_at   | -                | 0,181384709  | 0,377530647  | -0,19614594 |  |
| 226895_at    | NFIC             | 0,859074518  | 1,055274826  | -0,19620031 |  |
| 209386_at    | TM4SF1           | 3,899061119  | 4,09526554   | -0,19620442 |  |
| 1555726_at   | GAFA3            | -3,192553003 | -2,996335703 | -0,1962173  |  |
| 1556682_s_at | -                | -3,192553003 | -2,996335703 | -0,1962173  |  |
| 1561234_at   | -                | -3,192553003 | -2,996335703 | -0,1962173  |  |
| 217440_at    | -                | -3,192553003 | -2,996335703 | -0,1962173  |  |
| 219263_at    | RNF128           | -3,192553003 | -2,996335703 | -0,1962173  |  |
| 224022_x_at  | WNT16            | -3,192553003 | -2,996335703 | -0,1962173  |  |
| 233711_at    | -                | -3,192553003 | -2,996335703 | -0,1962173  |  |
| 239621_at    | -                | -3,192553003 | -2,996335703 | -0,1962173  |  |
| 240026_x_at  | -                | -3,192553003 | -2,996335703 | -0,1962173  |  |
| 203181_x_at  | SRPK2            | 2,406821352  | 2,603119255  | -0,1962979  |  |
| 210242_x_at  | ST20             | 1,394109935  | 1,590454215  | -0,19634428 |  |
| 221041_s_at  | SLC17A5          | 0,995078803  | 1,191491281  | -0,19641248 |  |
| 208793_x_at  | SMARCA4          | 3,839317436  | 4,035745559  | -0,19642812 |  |
| 218221_at    | ARNT             | 1,027166904  | 1,223626587  | -0,19645968 |  |
| 227008_at    | HDDC3            | 2,089851283  | 2,286318242  | -0,19646696 |  |
| 208353_x_at  | ANK1             | 1,512180019  | 1,708698295  | -0,19651828 |  |
| 227675_at    | LRSAM1           | 0,44160593   | 0,638150376  | -0,19654445 |  |
| 1566968_at   | SPRY4-IT1        | 1,119359127  | 1,315948728  | -0,1965896  |  |
| 218734_at    | NAA40            | 1,119359127  | 1,315948728  | -0,1965896  |  |
| 226693_at    | SDHAP1 /// SDH   | 1,578645857  | 1,775255987  | -0,19661013 |  |
| 201142_at    | EIF2S1           | 4,037433122  | 4,234134575  | -0,19670145 |  |
| 208858_s_at  | ESYT1            | 3,5222335    | 3,718943256  | -0,19670976 |  |
| 203044_at    | CHSY1            | 3,984619786  | 4,181349409  | -0,19672962 |  |
| 228635_at    | PCDH10           | 4,544218297  | 4,741007135  | -0,19678884 |  |
| 1554716_s_at | LINC00593        | -2,359436556 | -2,162639771 | -0,19679678 |  |
| 1555135_at   | -                | -2,359436556 | -2,162639771 | -0,19679678 |  |
| 1556378_a_at | LOC440896        | -2,359436556 | -2,162639771 | -0,19679678 |  |
| 1557262_at   | -                | -2,359436556 | -2,162639771 | -0,19679678 |  |
| 1558518_at   | TAB3             | -2,359436556 | -2,162639771 | -0,19679678 |  |
| 1560906_at   | -                | -2,359436556 | -2,162639771 | -0,19679678 |  |
| 1561218_s_at | LOC728099        | -2,359436556 | -2,162639771 | -0,19679678 |  |
| 1562121_at   | -                | -2,359436556 | -2,162639771 | -0,19679678 |  |
| 1565801_at   | -                | -2,359436556 | -2,162639771 | -0,19679678 |  |
| 211638_at    | IGH@ /// IGHA1 / | -2,359436556 | -2,162639771 | -0,19679678 |  |

|              |                   |              |              |             |  |
|--------------|-------------------|--------------|--------------|-------------|--|
| 214589_at    | FGF12             | -2,359436556 | -2,162639771 | -0,19679678 |  |
| 220276_at    | RERGL             | -2,359436556 | -2,162639771 | -0,19679678 |  |
| 227843_at    | NDE1              | -2,359436556 | -2,162639771 | -0,19679678 |  |
| 228362_s_at  | FAM26F            | -2,359436556 | -2,162639771 | -0,19679678 |  |
| 230066_at    | SNX25             | -2,359436556 | -2,162639771 | -0,19679678 |  |
| 231479_at    | TTC33             | -2,359436556 | -2,162639771 | -0,19679678 |  |
| 233979_s_at  | ESPN              | -2,359436556 | -2,162639771 | -0,19679678 |  |
| 234966_at    | KLK15             | -2,359436556 | -2,162639771 | -0,19679678 |  |
| 235350_at    | C4orf19           | -2,359436556 | -2,162639771 | -0,19679678 |  |
| 239174_at    | LOC100505912      | -2,359436556 | -2,162639771 | -0,19679678 |  |
| 240409_at    | TPTE2P5           | -2,359436556 | -2,162639771 | -0,19679678 |  |
| 244764_at    | HIVEP3            | -2,359436556 | -2,162639771 | -0,19679678 |  |
| 201061_s_at  | STOM              | 4,981629626  | 5,178490804  | -0,19686118 |  |
| 204016_at    | LARS2             | 2,402750389  | 2,599625088  | -0,1968747  |  |
| 1567611_at   | -                 | -0,299034815 | -0,102100538 | -0,19693428 |  |
| 215867_x_at  | CA12              | -0,299034815 | -0,102100538 | -0,19693428 |  |
| 221911_at    | ETV1              | -0,299034815 | -0,102100538 | -0,19693428 |  |
| 236819_at    | PTBP1             | -0,299034815 | -0,102100538 | -0,19693428 |  |
| 202538_s_at  | CHMP2B            | 3,634982121  | 3,831954914  | -0,19697279 |  |
| 205504_at    | BTK               | 2,760204767  | 2,957221307  | -0,19701654 |  |
| 207562_at    | DGKQ              | -0,221656139 | -0,024572586 | -0,19708355 |  |
| 220780_at    | PLA2G3            | -0,221656139 | -0,024572586 | -0,19708355 |  |
| 231176_at    | PRR19             | -0,221656139 | -0,024572586 | -0,19708355 |  |
| 232322_x_at  | STARD10           | -0,221656139 | -0,024572586 | -0,19708355 |  |
| 1555811_at   | ARHGDIB           | 0,95671774   | 1,153866761  | -0,19714902 |  |
| 232214_x_at  | ZNF554            | 0,95671774   | 1,153866761  | -0,19714902 |  |
| 201057_s_at  | GOLGB1            | 2,436992838  | 2,634191677  | -0,19719884 |  |
| 210532_s_at  | C14orf2           | 6,852677184  | 7,049944191  | -0,19726701 |  |
| 1554026_a_at | MYO10             | -1,812418401 | -1,615132408 | -0,19728599 |  |
| 1559658_at   | C15orf29          | -1,812418401 | -1,615132408 | -0,19728599 |  |
| 1559821_at   | -                 | -1,812418401 | -1,615132408 | -0,19728599 |  |
| 202694_at    | STK17A            | -1,812418401 | -1,615132408 | -0,19728599 |  |
| 208389_s_at  | SLC1A2            | -1,812418401 | -1,615132408 | -0,19728599 |  |
| 211381_x_at  | SPAG11B           | -1,812418401 | -1,615132408 | -0,19728599 |  |
| 212013_at    | PXDN              | -1,812418401 | -1,615132408 | -0,19728599 |  |
| 212962_at    | SYDE1             | -1,812418401 | -1,615132408 | -0,19728599 |  |
| 230830_at    | OSTBETA           | -1,812418401 | -1,615132408 | -0,19728599 |  |
| 230850_at    | -                 | -1,812418401 | -1,615132408 | -0,19728599 |  |
| 236218_at    | PHOSPHO1          | -1,812418401 | -1,615132408 | -0,19728599 |  |
| 240969_at    | -                 | -1,812418401 | -1,615132408 | -0,19728599 |  |
| 242222_at    | LOC151009 /// LOC | -1,812418401 | -1,615132408 | -0,19728599 |  |
| 242935_at    | SBF2              | -1,812418401 | -1,615132408 | -0,19728599 |  |
| 243517_at    | -                 | -1,812418401 | -1,615132408 | -0,19728599 |  |
| 243717_at    | EPHA10            | -1,812418401 | -1,615132408 | -0,19728599 |  |
| 243769_at    | -                 | -1,812418401 | -1,615132408 | -0,19728599 |  |
| 243833_at    | UNC5A             | -1,812418401 | -1,615132408 | -0,19728599 |  |
| 244643_at    | LOC100506652      | -1,812418401 | -1,615132408 | -0,19728599 |  |
| 228355_s_at  | NDUFAF2           | 4,18754617   | 4,384854065  | -0,1973079  |  |
| 46665_at     | SEMA4C            | 3,592722283  | 3,790031242  | -0,19730896 |  |
| 204412_s_at  | NEFH              | 4,879869174  | 5,077234589  | -0,19736542 |  |
| 221949_at    | UBE2D4            | 0,052199481  | 0,249604176  | -0,1974047  |  |
| 225487_at    | TMEM18            | 0,052199481  | 0,249604176  | -0,1974047  |  |
| 226977_at    | IGIP              | 0,052199481  | 0,249604176  | -0,1974047  |  |
| 228527_s_at  | SLC25A37          | 0,052199481  | 0,249604176  | -0,1974047  |  |
| 209764_at    | MGAT3             | 1,283332461  | 1,480766833  | -0,19743437 |  |
| 222623_s_at  | ZNF639            | 4,168490774  | 4,365953461  | -0,19746269 |  |

|              |           |              |              |             |  |
|--------------|-----------|--------------|--------------|-------------|--|
| 204556_s_at  | DZIP1     | 2,410880861  | 2,608344689  | -0,19746383 |  |
| 209714_s_at  | CDKN3     | 3,915583941  | 4,113143231  | -0,19755929 |  |
| 209220_at    | GPC3      | 0,334552598  | 0,532164371  | -0,19761177 |  |
| 225736_at    | FBXO22    | 2,185368281  | 2,382985886  | -0,19761761 |  |
| 218012_at    | TSPYL2    | 2,646022818  | 2,843651104  | -0,19762829 |  |
| 224808_s_at  | GET4      | 2,254767157  | 2,452428893  | -0,19766174 |  |
| 217798_at    | CNOT2     | 2,755423794  | 2,953119918  | -0,19769612 |  |
| 204980_at    | CLOCK     | 0,695652136  | 0,893473268  | -0,19782113 |  |
| 227704_at    | C19orf12  | 0,695652136  | 0,893473268  | -0,19782113 |  |
| 218336_at    | PFDN2     | 4,98707791   | 5,184917368  | -0,19783946 |  |
| 203110_at    | PTK2B     | 0,735041319  | 0,932882274  | -0,19784095 |  |
| 1558214_s_at | CTNNA1    | 0,917308734  | 1,115234684  | -0,19792595 |  |
| 208895_s_at  | DDX18     | 4,138815532  | 4,336867701  | -0,19805217 |  |
| 1553611_s_at | KLHL35    | 1,251994932  | 1,450051551  | -0,19805662 |  |
| 218187_s_at  | C8orf33   | 3,489018063  | 3,687194562  | -0,1981765  |  |
| 201785_at    | RNASE1    | 1,732533761  | 1,930732138  | -0,19819838 |  |
| 202925_s_at  | PLAGL2    | 2,965960999  | 3,164168347  | -0,19820735 |  |
| 223064_at    | RNF181    | 4,957548451  | 5,155769676  | -0,19822123 |  |
| 200955_at    | IMMT      | 4,471257399  | 4,669482912  | -0,19822551 |  |
| 218664_at    | MECR      | 1,880387527  | 2,078620836  | -0,19823331 |  |
| 201711_x_at  | RANBP2    | 2,122398022  | 2,320681318  | -0,1982833  |  |
| 200660_at    | S100A11   | 3,423218668  | 3,621520989  | -0,19830232 |  |
| 212185_x_at  | MT2A      | 5,948540128  | 6,146853364  | -0,19831324 |  |
| 222680_s_at  | DTL       | 2,758612869  | 2,957221307  | -0,19860844 |  |
| 210962_s_at  | AKAP9     | 2,553576109  | 2,752192409  | -0,1986163  |  |
| 237475_x_at  | CCDC152   | 2,485917452  | 2,684536601  | -0,19861915 |  |
| 203183_s_at  | SMARCD1   | -0,394749123 | -0,19610998  | -0,19863914 |  |
| 237112_at    | -         | -0,394749123 | -0,19610998  | -0,19863914 |  |
| 221537_at    | PLXNA1    | 2,043538949  | 2,242180416  | -0,19864147 |  |
| 1555349_a_at | ITGB2     | 1,607231019  | 1,805902329  | -0,19867131 |  |
| 1569352_at   | FNIP2     | -1,353583928 | -1,154897679 | -0,19868625 |  |
| 208057_s_at  | GLI2      | -1,353583928 | -1,154897679 | -0,19868625 |  |
| 208463_at    | GABRA4    | -1,353583928 | -1,154897679 | -0,19868625 |  |
| 214556_at    | SSTR4     | -1,353583928 | -1,154897679 | -0,19868625 |  |
| 215304_at    | -         | -1,353583928 | -1,154897679 | -0,19868625 |  |
| 216427_at    | -         | -1,353583928 | -1,154897679 | -0,19868625 |  |
| 217657_at    | -         | -1,353583928 | -1,154897679 | -0,19868625 |  |
| 227417_at    | MARC2     | -1,353583928 | -1,154897679 | -0,19868625 |  |
| 233509_at    | HERC4     | -1,353583928 | -1,154897679 | -0,19868625 |  |
| 234006_s_at  | TMEM234   | -1,353583928 | -1,154897679 | -0,19868625 |  |
| 239327_at    | -         | -1,353583928 | -1,154897679 | -0,19868625 |  |
| 239540_at    | -         | -1,353583928 | -1,154897679 | -0,19868625 |  |
| 240687_at    | PASD1     | -1,353583928 | -1,154897679 | -0,19868625 |  |
| 241604_at    | ATP11A    | -1,353583928 | -1,154897679 | -0,19868625 |  |
| 241897_at    | -         | -1,353583928 | -1,154897679 | -0,19868625 |  |
| 242032_at    | KIDINS220 | -1,353583928 | -1,154897679 | -0,19868625 |  |
| 243392_at    | USP49     | -1,353583928 | -1,154897679 | -0,19868625 |  |
| 243501_at    | ATP5F1    | -1,353583928 | -1,154897679 | -0,19868625 |  |
| 215299_x_at  | SULT1A1   | 1,191926657  | 1,390636111  | -0,19870945 |  |
| 227987_at    | VPS13A    | 1,191926657  | 1,390636111  | -0,19870945 |  |
| 201954_at    | ARPC1B    | 4,317026567  | 4,515755502  | -0,19872894 |  |
| 219702_at    | PLAC1     | 0,606430281  | 0,805216064  | -0,19878578 |  |
| 221944_at    | FLJ42627  | 0,606430281  | 0,805216064  | -0,19878578 |  |
| 228488_at    | TBC1D16   | 0,425644434  | 0,624460759  | -0,19881633 |  |
| 45526_g_at   | NAA60     | 3,921642628  | 4,12047658   | -0,19883395 |  |
| 217729_s_at  | AES       | 2,678376417  | 2,877228323  | -0,19885191 |  |

|              |                   |              |              |             |  |
|--------------|-------------------|--------------|--------------|-------------|--|
| 208300_at    | PTPRH             | -0,022466681 | 0,176436073  | -0,19890275 |  |
| 225185_at    | MRAS              | -0,022466681 | 0,176436073  | -0,19890275 |  |
| 203835_at    | LRRC32            | -0,089689931 | 0,109221392  | -0,19891132 |  |
| 216170_at    | -                 | -0,089689931 | 0,109221392  | -0,19891132 |  |
| 233660_at    | EHD4              | -0,089689931 | 0,109221392  | -0,19891132 |  |
| 240508_at    | -                 | -0,089689931 | 0,109221392  | -0,19891132 |  |
| 211609_x_at  | PSMD4             | 4,758484959  | 4,957452957  | -0,198968   |  |
| 225879_at    | TSEN54            | 3,381421359  | 3,580454966  | -0,19903361 |  |
| 203907_s_at  | IQSEC1            | 1,960118853  | 2,159161028  | -0,19904217 |  |
| 47550_at     | LZTS1             | -2,286673642 | -2,087542851 | -0,19913079 |  |
| 227079_at    | DHX8              | 1,666156729  | 1,865308541  | -0,19915181 |  |
| 205965_at    | BATF              | 1,560488174  | 1,759685182  | -0,19919701 |  |
| 227313_at    | CNPY4             | 1,560488174  | 1,759685182  | -0,19919701 |  |
| 1553394_a_at | TFAP2B            | -2,236765673 | -2,037551727 | -0,19921395 |  |
| 1561278_at   | -                 | -2,236765673 | -2,037551727 | -0,19921395 |  |
| 1562238_at   | USPL1             | -2,236765673 | -2,037551727 | -0,19921395 |  |
| 1563906_at   | SOBP              | -2,236765673 | -2,037551727 | -0,19921395 |  |
| 1565934_at   | C4orf21           | -2,236765673 | -2,037551727 | -0,19921395 |  |
| 1566464_at   | KCNK1             | -2,236765673 | -2,037551727 | -0,19921395 |  |
| 208064_s_at  | ST8SIA3           | -2,236765673 | -2,037551727 | -0,19921395 |  |
| 210462_at    | BLZF1             | -2,236765673 | -2,037551727 | -0,19921395 |  |
| 216557_x_at  | IGHA1 /// IGHD // | -2,236765673 | -2,037551727 | -0,19921395 |  |
| 217036_at    | -                 | -2,236765673 | -2,037551727 | -0,19921395 |  |
| 222972_at    | VSX1              | -2,236765673 | -2,037551727 | -0,19921395 |  |
| 224107_at    | -                 | -2,236765673 | -2,037551727 | -0,19921395 |  |
| 224774_s_at  | NAV1              | -2,236765673 | -2,037551727 | -0,19921395 |  |
| 225763_at    | RCSD1             | -2,236765673 | -2,037551727 | -0,19921395 |  |
| 229782_at    | RMST              | -2,236765673 | -2,037551727 | -0,19921395 |  |
| 234377_at    | IL23A             | -2,236765673 | -2,037551727 | -0,19921395 |  |
| 237867_s_at  | PID1              | -2,236765673 | -2,037551727 | -0,19921395 |  |
| 238163_at    | LOC100652995 /    | -2,236765673 | -2,037551727 | -0,19921395 |  |
| 242085_at    | -                 | -2,236765673 | -2,037551727 | -0,19921395 |  |
| 221501_x_at  | LOC100288332 /    | 3,833280332  | 4,032509762  | -0,19922943 |  |
| 214684_at    | MEF2A             | 2,882181479  | 3,081412119  | -0,19923064 |  |
| 226190_at    | MAP3K13           | 3,166555554  | 3,365837114  | -0,19928156 |  |
| 1553298_at   | C17orf77          | -3,15396682  | -2,954576755 | -0,19939006 |  |
| 1557534_at   | LOC339862         | -3,15396682  | -2,954576755 | -0,19939006 |  |
| 1560516_at   | -                 | -3,15396682  | -2,954576755 | -0,19939006 |  |
| 1561863_a_at | -                 | -3,15396682  | -2,954576755 | -0,19939006 |  |
| 1562260_at   | -                 | -3,15396682  | -2,954576755 | -0,19939006 |  |
| 211520_s_at  | GRIA1             | -3,15396682  | -2,954576755 | -0,19939006 |  |
| 216171_at    | -                 | -3,15396682  | -2,954576755 | -0,19939006 |  |
| 216876_s_at  | IL17A             | -3,15396682  | -2,954576755 | -0,19939006 |  |
| 224081_at    | -                 | -3,15396682  | -2,954576755 | -0,19939006 |  |
| 231213_at    | PDE1A             | -3,15396682  | -2,954576755 | -0,19939006 |  |
| 233392_at    | -                 | -3,15396682  | -2,954576755 | -0,19939006 |  |
| 234080_at    | -                 | -3,15396682  | -2,954576755 | -0,19939006 |  |
| 240564_x_at  | -                 | -3,15396682  | -2,954576755 | -0,19939006 |  |
| 241537_at    | -                 | -3,15396682  | -2,954576755 | -0,19939006 |  |
| 1558045_a_at | LOC389906 /// LC  | 1,099375065  | 1,298813045  | -0,19943798 |  |
| 202004_x_at  | SDHC              | 4,13575284   | 4,335292864  | -0,19954002 |  |
| 225083_at    | GTF3C6            | 6,182758204  | 6,382337077  | -0,19957887 |  |
| 201837_s_at  | SUPT7L            | 3,199783157  | 3,399383202  | -0,19960005 |  |
| 1555443_at   | CCDC172           | -1,937711681 | -1,738067356 | -0,19964433 |  |
| 1558887_at   | ZNF321P /// ZNF   | -1,937711681 | -1,738067356 | -0,19964433 |  |
| 1559093_at   | FLJ30403          | -1,937711681 | -1,738067356 | -0,19964433 |  |

|              |              |              |              |             |  |
|--------------|--------------|--------------|--------------|-------------|--|
| 1559232_a_at | -            | -1,937711681 | -1,738067356 | -0,19964433 |  |
| 1559331_x_at | -            | -1,937711681 | -1,738067356 | -0,19964433 |  |
| 1559777_at   | LOC731424    | -1,937711681 | -1,738067356 | -0,19964433 |  |
| 1561266_at   | LOC100507033 | -1,937711681 | -1,738067356 | -0,19964433 |  |
| 1562234_a_at | NAV3         | -1,937711681 | -1,738067356 | -0,19964433 |  |
| 1570490_at   | -            | -1,937711681 | -1,738067356 | -0,19964433 |  |
| 205722_s_at  | GFRA2        | -1,937711681 | -1,738067356 | -0,19964433 |  |
| 206365_at    | XCL1         | -1,937711681 | -1,738067356 | -0,19964433 |  |
| 210751_s_at  | RGN          | -1,937711681 | -1,738067356 | -0,19964433 |  |
| 211732_x_at  | HNMT         | -1,937711681 | -1,738067356 | -0,19964433 |  |
| 215969_at    | -            | -1,937711681 | -1,738067356 | -0,19964433 |  |
| 216013_at    | ZXDB         | -1,937711681 | -1,738067356 | -0,19964433 |  |
| 216278_at    | -            | -1,937711681 | -1,738067356 | -0,19964433 |  |
| 216374_at    | -            | -1,937711681 | -1,738067356 | -0,19964433 |  |
| 217228_s_at  | ASB4         | -1,937711681 | -1,738067356 | -0,19964433 |  |
| 219792_at    | AGMAT        | -1,937711681 | -1,738067356 | -0,19964433 |  |
| 219867_at    | CHODL        | -1,937711681 | -1,738067356 | -0,19964433 |  |
| 221358_at    | NPBWR2       | -1,937711681 | -1,738067356 | -0,19964433 |  |
| 228872_at    | FAM108B1     | -1,937711681 | -1,738067356 | -0,19964433 |  |
| 232364_at    | LOC100506235 | -1,937711681 | -1,738067356 | -0,19964433 |  |
| 234482_at    | -            | -1,937711681 | -1,738067356 | -0,19964433 |  |
| 239575_at    | OPALIN       | -1,937711681 | -1,738067356 | -0,19964433 |  |
| 239683_at    | CLYBL        | -1,937711681 | -1,738067356 | -0,19964433 |  |
| 240827_at    | FLJ45983     | -1,937711681 | -1,738067356 | -0,19964433 |  |
| 241511_at    | -            | -1,937711681 | -1,738067356 | -0,19964433 |  |
| 244527_at    | TRIO         | -1,937711681 | -1,738067356 | -0,19964433 |  |
| 201457_x_at  | BUB3         | 5,676603865  | 5,876251039  | -0,19964717 |  |
| 219693_at    | AGPAT4       | 0,760715727  | 0,960386719  | -0,19967099 |  |
| 227500_at    | FBXL18       | 0,760715727  | 0,960386719  | -0,19967099 |  |
| 202431_s_at  | MYC          | 6,252421164  | 6,452113349  | -0,19969219 |  |
| 219672_at    | AHSP         | 0,555999837  | 0,755840599  | -0,19984076 |  |
| 211894_x_at  | SEZ6L        | -0,59053611  | -0,39061235  | -0,19992376 |  |
| 217315_s_at  | KLK13        | -0,59053611  | -0,39061235  | -0,19992376 |  |
| 217615_at    | -            | -0,59053611  | -0,39061235  | -0,19992376 |  |
| 223333_s_at  | ANGPTL4      | -0,59053611  | -0,39061235  | -0,19992376 |  |
| 229203_at    | B4GALNT3     | -0,59053611  | -0,39061235  | -0,19992376 |  |
| 232241_at    | LOC100272228 | -0,59053611  | -0,39061235  | -0,19992376 |  |
| 232873_at    | ZNF33A       | -0,59053611  | -0,39061235  | -0,19992376 |  |
| 236967_at    | LOC645249    | -0,59053611  | -0,39061235  | -0,19992376 |  |
| 201070_x_at  | SF3B1        | 2,238870125  | 2,438805127  | -0,199935   |  |
| 221035_s_at  | TEX14        | 1,210676994  | 1,410714371  | -0,20003738 |  |
| 232215_x_at  | PRR11        | 3,095191939  | 3,295230443  | -0,2000385  |  |
| 205229_s_at  | COCH         | 5,037507384  | 5,237574502  | -0,20006712 |  |
| 225588_s_at  | TMEM129      | 0,317354302  | 0,51742585   | -0,20007155 |  |
| 227511_at    | -            | 0,317354302  | 0,51742585   | -0,20007155 |  |
| 232495_x_at  | -            | 0,317354302  | 0,51742585   | -0,20007155 |  |
| 212829_at    | PIP4K2A      | 3,906268218  | 4,106388091  | -0,20011987 |  |
| 202718_at    | IGFBP2       | 4,149180318  | 4,349404898  | -0,20022458 |  |
| 1555843_at   | HNRNPM       | 0,152582607  | 0,352836757  | -0,20025415 |  |
| 221071_at    | -            | 0,152582607  | 0,352836757  | -0,20025415 |  |
| 230345_at    | SEMA7A       | 0,152582607  | 0,352836757  | -0,20025415 |  |
| 226679_at    | SLC26A11     | 2,166283906  | 2,366632651  | -0,20034875 |  |
| 211779_x_at  | AP2A2        | 2,390468117  | 2,590852465  | -0,20038435 |  |
| 224688_at    | TMEM248      | 2,352981171  | 2,553413592  | -0,20043242 |  |
| 224686_x_at  | LOC100653329 | 3,193905507  | 3,394350331  | -0,20044482 |  |
| 224972_at    | ROMO1        | 4,813186795  | 5,013671918  | -0,20048512 |  |

|              |                     |              |              |             |  |
|--------------|---------------------|--------------|--------------|-------------|--|
| 1552973_at   | WNT9B               | -2,063149277 | -1,862647763 | -0,20050151 |  |
| 1554394_at   | NELL1               | -2,063149277 | -1,862647763 | -0,20050151 |  |
| 1557562_at   | -                   | -2,063149277 | -1,862647763 | -0,20050151 |  |
| 1559828_at   | FAM170B             | -2,063149277 | -1,862647763 | -0,20050151 |  |
| 1563364_at   | -                   | -2,063149277 | -1,862647763 | -0,20050151 |  |
| 203000_at    | STMN2               | -2,063149277 | -1,862647763 | -0,20050151 |  |
| 208239_at    | FOXE1               | -2,063149277 | -1,862647763 | -0,20050151 |  |
| 211579_at    | ITGB3               | -2,063149277 | -1,862647763 | -0,20050151 |  |
| 211694_at    | TSSK1B              | -2,063149277 | -1,862647763 | -0,20050151 |  |
| 215163_at    | -                   | -2,063149277 | -1,862647763 | -0,20050151 |  |
| 215375_x_at  | LRRFIP1             | -2,063149277 | -1,862647763 | -0,20050151 |  |
| 218623_at    | HMP19               | -2,063149277 | -1,862647763 | -0,20050151 |  |
| 220995_at    | STXBP6              | -2,063149277 | -1,862647763 | -0,20050151 |  |
| 232655_at    | UGT1A1              | -2,063149277 | -1,862647763 | -0,20050151 |  |
| 233222_at    | -                   | -2,063149277 | -1,862647763 | -0,20050151 |  |
| 234546_at    | -                   | -2,063149277 | -1,862647763 | -0,20050151 |  |
| 236886_at    | LOC100049716        | -2,063149277 | -1,862647763 | -0,20050151 |  |
| 237376_at    | -                   | -2,063149277 | -1,862647763 | -0,20050151 |  |
| 237592_at    | ZC2HC1B             | -2,063149277 | -1,862647763 | -0,20050151 |  |
| 240055_at    | -                   | -2,063149277 | -1,862647763 | -0,20050151 |  |
| 1553214_a_at | CCDC7               | -3,37835     | -3,177802286 | -0,20054771 |  |
| 1570235_at   | MGC27382            | -3,37835     | -3,177802286 | -0,20054771 |  |
| 216737_at    | -                   | -3,37835     | -3,177802286 | -0,20054771 |  |
| 208995_s_at  | PPIG                | 2,819431021  | 3,019999252  | -0,20056823 |  |
| 218627_at    | DRAM1               | -0,172274514 | 0,028364014  | -0,20063853 |  |
| 232609_at    | CRB3                | -0,172274514 | 0,028364014  | -0,20063853 |  |
| 238027_at    | SPATA24             | -0,172274514 | 0,028364014  | -0,20063853 |  |
| 239135_at    | CPPED1              | -0,172274514 | 0,028364014  | -0,20063853 |  |
| 242365_at    | -                   | -0,172274514 | 0,028364014  | -0,20063853 |  |
| 213311_s_at  | TCF25               | 3,274090262  | 3,474751011  | -0,20066075 |  |
| 227518_at    | SLC35E1             | 3,608715137  | 3,809444866  | -0,20072973 |  |
| 202227_s_at  | BRD8                | 4,202260026  | 4,403009191  | -0,20074916 |  |
| 210212_x_at  | MTCP1NB             | 1,177702228  | 1,378453643  | -0,20075142 |  |
| 225305_at    | SLC25A29            | 1,177702228  | 1,378453643  | -0,20075142 |  |
| 224701_at    | PARP14              | 1,549482847  | 1,750261389  | -0,20077854 |  |
| 207436_x_at  | -                   | 3,170152481  | 3,370970266  | -0,20081778 |  |
| 210011_s_at  | EWSR1               | 3,088871381  | 3,289820089  | -0,20094871 |  |
| 210474_s_at  | CDK11A /// CDK7     | 0,503742507  | 0,704715219  | -0,20097271 |  |
| 206493_at    | ITGA2B              | 2,361396186  | 2,562416132  | -0,20101995 |  |
| 200768_s_at  | MAT2A               | 4,896611985  | 5,097659882  | -0,2010479  |  |
| 205278_at    | GAD1                | 3,290707863  | 3,491815843  | -0,20110798 |  |
| 241929_at    | -                   | 2,535098095  | 2,7363693    | -0,2012712  |  |
| 202836_s_at  | TXNL4A              | 5,376546165  | 5,577833302  | -0,20128714 |  |
| 210788_s_at  | DHRS7               | 3,301680869  | 3,503081281  | -0,20140041 |  |
| 1553340_s_at | SLC35G3 /// SLC35G3 | 0,255492549  | 0,456918297  | -0,20142575 |  |
| 1559870_at   | LOC100129129        | 0,255492549  | 0,456918297  | -0,20142575 |  |
| 217199_s_at  | STAT2               | 0,255492549  | 0,456918297  | -0,20142575 |  |
| 238508_at    | DBF4B               | 0,255492549  | 0,456918297  | -0,20142575 |  |
| 238883_at    | -                   | 0,255492549  | 0,456918297  | -0,20142575 |  |
| 1565752_at   | FGD2                | 0,747935635  | 0,949447784  | -0,20151215 |  |
| 208789_at    | PTRF                | 0,747935635  | 0,949447784  | -0,20151215 |  |
| 238630_at    | OPA3                | 0,747935635  | 0,949447784  | -0,20151215 |  |
| 1560926_at   | -                   | 1,114389003  | 1,315948728  | -0,20155972 |  |
| 202055_at    | KPNA1               | 3,220746604  | 3,42231092   | -0,20156432 |  |
| 221738_at    | RALGAPB             | 1,406361373  | 1,60795124   | -0,20158987 |  |
| 203606_at    | NDUFS6              | 5,649158686  | 5,850757118  | -0,20159843 |  |

|              |                 |              |              |             |  |
|--------------|-----------------|--------------|--------------|-------------|--|
| 226387_at    | RSBN1L          | 2,369762403  | 2,571362843  | -0,20160044 |  |
| 207877_s_at  | NVL             | 2,487840343  | 2,689475799  | -0,20163546 |  |
| 218543_s_at  | PARP12          | 3,253893136  | 3,455550298  | -0,20165716 |  |
| 230147_at    | F2RL2           | 1,021868205  | 1,223626587  | -0,20175838 |  |
| 210563_x_at  | CFLAR           | 4,824643564  | 5,026415289  | -0,20177173 |  |
| 225780_at    | DDI2 /// RSC1A1 | 3,330897748  | 3,532699346  | -0,2018016  |  |
| 223058_at    | FAM107B         | 1,305306849  | 1,507116528  | -0,20180968 |  |
| 1557481_a_at | LINC00320       | -2,823166348 | -2,621331989 | -0,20183436 |  |
| 1559760_at   | LOC401220       | -2,823166348 | -2,621331989 | -0,20183436 |  |
| 1560475_at   | LOC100129455    | -2,823166348 | -2,621331989 | -0,20183436 |  |
| 1561279_at   | -               | -2,823166348 | -2,621331989 | -0,20183436 |  |
| 1561445_at   | -               | -2,823166348 | -2,621331989 | -0,20183436 |  |
| 1562167_a_at | DEFB122         | -2,823166348 | -2,621331989 | -0,20183436 |  |
| 1562634_at   | -               | -2,823166348 | -2,621331989 | -0,20183436 |  |
| 1568794_at   | LOC643355       | -2,823166348 | -2,621331989 | -0,20183436 |  |
| 1568872_at   | LOC100506025    | -2,823166348 | -2,621331989 | -0,20183436 |  |
| 206490_at    | DLGAP1          | -2,823166348 | -2,621331989 | -0,20183436 |  |
| 206710_s_at  | EPB41L3         | -2,823166348 | -2,621331989 | -0,20183436 |  |
| 207804_s_at  | FCN2            | -2,823166348 | -2,621331989 | -0,20183436 |  |
| 207864_at    | SCN7A           | -2,823166348 | -2,621331989 | -0,20183436 |  |
| 209392_at    | ENPP2           | -2,823166348 | -2,621331989 | -0,20183436 |  |
| 210945_at    | COL4A6          | -2,823166348 | -2,621331989 | -0,20183436 |  |
| 219564_at    | KCNJ16          | -2,823166348 | -2,621331989 | -0,20183436 |  |
| 231781_s_at  | LRRC2           | -2,823166348 | -2,621331989 | -0,20183436 |  |
| 232257_s_at  | -               | -2,823166348 | -2,621331989 | -0,20183436 |  |
| 232971_at    | RBM15           | -2,823166348 | -2,621331989 | -0,20183436 |  |
| 233786_at    | -               | -2,823166348 | -2,621331989 | -0,20183436 |  |
| 240738_at    | -               | -2,823166348 | -2,621331989 | -0,20183436 |  |
| 241035_s_at  | TMEM161B-AS1    | -2,823166348 | -2,621331989 | -0,20183436 |  |
| 222476_at    | CNOT6           | 3,285189903  | 3,487095824  | -0,20190592 |  |
| 237393_at    | TPBGL           | 0,020670649  | 0,222599095  | -0,20192845 |  |
| 237443_at    | -               | 0,020670649  | 0,222599095  | -0,20192845 |  |
| 226307_at    | CRTC2           | 1,352503698  | 1,55481039   | -0,20230669 |  |
| 1559921_at   | PECAM1          | 0,401366113  | 0,603679647  | -0,20231353 |  |
| 239388_at    | -               | 0,401366113  | 0,603679647  | -0,20231353 |  |
| 225144_at    | BMPR2           | 1,742232072  | 1,944570415  | -0,20233834 |  |
| 200695_at    | PPP2R1A         | 3,708558634  | 3,910906416  | -0,20234778 |  |
| 218601_at    | URGCP           | 2,400710591  | 2,603119255  | -0,20240866 |  |
| 213713_s_at  | GLB1L2          | 2,017152618  | 2,21959457   | -0,20244195 |  |
| 213542_at    | ZNF710          | 1,515954005  | 1,718396606  | -0,2024426  |  |
| 236160_at    | TRIP11          | 1,515954005  | 1,718396606  | -0,2024426  |  |
| 218890_x_at  | MRPL35          | 4,441801334  | 4,644266013  | -0,20246468 |  |
| 213059_at    | CREB3L1         | 3,143564369  | 3,346162854  | -0,20259848 |  |
| 218781_at    | SMC6            | 3,647078281  | 3,849713445  | -0,20263516 |  |
| 217667_at    | SEC14L1P1       | -0,423248115 | -0,220592223 | -0,20265589 |  |
| 219716_at    | APOL6           | -0,423248115 | -0,220592223 | -0,20265589 |  |
| 223963_s_at  | IGF2BP2         | -0,423248115 | -0,220592223 | -0,20265589 |  |
| 236109_at    | -               | -0,423248115 | -0,220592223 | -0,20265589 |  |
| 240400_at    | -               | -0,423248115 | -0,220592223 | -0,20265589 |  |
| 1569973_at   | -               | 0,661985843  | 0,864649967  | -0,20266412 |  |
| 218725_at    | SLC25A22        | 0,661985843  | 0,864649967  | -0,20266412 |  |
| 221981_s_at  | WDR59           | 0,661985843  | 0,864649967  | -0,20266412 |  |
| 226763_at    | SESTD1          | 1,556829052  | 1,759685182  | -0,20285613 |  |
| 239841_at    | -               | 1,556829052  | 1,759685182  | -0,20285613 |  |
| 218003_s_at  | FKBP3 /// LOC10 | 5,310855527  | 5,513720861  | -0,20286533 |  |
| 204453_at    | ZNF84           | 2,940912947  | 3,14392006   | -0,20300711 |  |



|              |                   |              |              |             |  |
|--------------|-------------------|--------------|--------------|-------------|--|
| 218654_s_at  | MRPS33            | 4,568952594  | 4,77199376   | -0,20304117 |  |
| 225071_at    | NUS1              | 4,293583319  | 4,496626742  | -0,20304342 |  |
| 1555759_a_at | CCL5              | 0,133056859  | 0,336136178  | -0,20307932 |  |
| 244153_at    | ZNF207            | 0,133056859  | 0,336136178  | -0,20307932 |  |
| 213545_x_at  | SNX3              | 4,775901501  | 4,979128808  | -0,20322731 |  |
| 222983_s_at  | PAIP2             | 4,937286399  | 5,140521187  | -0,20323479 |  |
| 217925_s_at  | C6orf106          | 2,294858597  | 2,498185745  | -0,20332715 |  |
| 238585_at    | GTDC1             | 1,215326747  | 1,418668082  | -0,20334134 |  |
| 203200_s_at  | MTRR              | 2,382221458  | 2,585563171  | -0,20334171 |  |
| 207971_s_at  | CEP68             | 1,187200746  | 1,390636111  | -0,20343536 |  |
| 233093_s_at  | BIRC6             | 3,738747209  | 3,942281595  | -0,20353439 |  |
| 233532_x_at  | IFT52             | 1,655931423  | 1,859476797  | -0,20354537 |  |
| 214957_at    | ACTL8             | 3,292909151  | 3,496520471  | -0,20361132 |  |
| 213329_at    | SRGAP2            | 0,911589958  | 1,115234684  | -0,20364473 |  |
| 204173_at    | MYL6B             | 3,927675977  | 4,131407181  | -0,2037312  |  |
| 236537_at    | -                 | 0,613492853  | 0,817300337  | -0,20380748 |  |
| 1555993_at   | CACNA1D           | -1,424023738 | -1,220210588 | -0,20381315 |  |
| 1559702_at   | -                 | -1,424023738 | -1,220210588 | -0,20381315 |  |
| 1561034_at   | -                 | -1,424023738 | -1,220210588 | -0,20381315 |  |
| 206714_at    | ALOX15B           | -1,424023738 | -1,220210588 | -0,20381315 |  |
| 210872_x_at  | GAS7              | -1,424023738 | -1,220210588 | -0,20381315 |  |
| 214563_at    | PCDHGC3           | -1,424023738 | -1,220210588 | -0,20381315 |  |
| 216129_at    | ATP9A             | -1,424023738 | -1,220210588 | -0,20381315 |  |
| 216587_s_at  | FZD8              | -1,424023738 | -1,220210588 | -0,20381315 |  |
| 218687_s_at  | MUC13             | -1,424023738 | -1,220210588 | -0,20381315 |  |
| 219503_s_at  | TMEM40            | -1,424023738 | -1,220210588 | -0,20381315 |  |
| 224202_at    | SUFU              | -1,424023738 | -1,220210588 | -0,20381315 |  |
| 228510_at    | ATAT1             | -1,424023738 | -1,220210588 | -0,20381315 |  |
| 228581_at    | KCNJ10            | -1,424023738 | -1,220210588 | -0,20381315 |  |
| 229144_at    | KAZN              | -1,424023738 | -1,220210588 | -0,20381315 |  |
| 231722_at    | CASP14            | -1,424023738 | -1,220210588 | -0,20381315 |  |
| 233281_at    | -                 | -1,424023738 | -1,220210588 | -0,20381315 |  |
| 234069_at    | -                 | -1,424023738 | -1,220210588 | -0,20381315 |  |
| 235856_at    | -                 | -1,424023738 | -1,220210588 | -0,20381315 |  |
| 236368_at    | KIAA0368          | -1,424023738 | -1,220210588 | -0,20381315 |  |
| 240163_at    | RORA              | -1,424023738 | -1,220210588 | -0,20381315 |  |
| 243402_at    | LOC149837 /// LOC | -1,424023738 | -1,220210588 | -0,20381315 |  |
| 1560458_s_at | CAPS2             | -3,342483913 | -3,138626879 | -0,20385703 |  |
| 236172_at    | LTB4R             | 0,291166226  | 0,495031851  | -0,20386562 |  |
| 217878_s_at  | CDC27             | 2,796341835  | 3,000258961  | -0,20391713 |  |
| 225477_s_at  | NR2C2             | 2,663141434  | 2,867091644  | -0,20395021 |  |
| 204459_at    | CSTF2             | 3,431234921  | 3,635238397  | -0,20400348 |  |
| 201374_x_at  | PPP2CB            | -0,85085127  | -0,646746079 | -0,20410519 |  |
| 203797_at    | VSNL1             | -0,85085127  | -0,646746079 | -0,20410519 |  |
| 231047_at    | -                 | -0,85085127  | -0,646746079 | -0,20410519 |  |
| 234846_at    | DKFZp761P0212     | -0,85085127  | -0,646746079 | -0,20410519 |  |
| 237515_at    | TMEM56            | -0,85085127  | -0,646746079 | -0,20410519 |  |
| 239901_at    | -                 | -0,85085127  | -0,646746079 | -0,20410519 |  |
| 243376_at    | TANK              | -0,85085127  | -0,646746079 | -0,20410519 |  |
| 207860_at    | NCR1              | -0,196756757 | 0,007421914  | -0,20417867 |  |
| 208494_at    | SLC6A7            | -0,196756757 | 0,007421914  | -0,20417867 |  |
| 211735_x_at  | SFTPC             | -0,196756757 | 0,007421914  | -0,20417867 |  |
| 230833_at    | ACRBP             | -0,196756757 | 0,007421914  | -0,20417867 |  |
| 234922_s_at  | NHSL1             | -0,196756757 | 0,007421914  | -0,20417867 |  |
| 239084_at    | SNAP29            | -0,196756757 | 0,007421914  | -0,20417867 |  |
| 239366_at    | -                 | -0,196756757 | 0,007421914  | -0,20417867 |  |

|              |                |              |              |             |  |
|--------------|----------------|--------------|--------------|-------------|--|
| 219906_at    | EBLN2          | 1,153678675  | 1,3579181    | -0,20423943 |  |
| 203503_s_at  | PEX14          | 1,314003737  | 1,518263577  | -0,20425984 |  |
| 225974_at    | TMEM64         | 5,097296471  | 5,301609855  | -0,20431338 |  |
| 223290_at    | PDXP /// SH3BP | 3,102740237  | 3,307062282  | -0,20432204 |  |
| 1555982_at   | ZFYVE16        | -0,622910612 | -0,41858459  | -0,20432602 |  |
| 212868_x_at  | MAPKAPK5-AS1   | -0,622910612 | -0,41858459  | -0,20432602 |  |
| 213121_at    | SNRNP70        | -0,622910612 | -0,41858459  | -0,20432602 |  |
| 215789_s_at  | AJAP1          | -0,622910612 | -0,41858459  | -0,20432602 |  |
| 217584_at    | NPC1           | -0,622910612 | -0,41858459  | -0,20432602 |  |
| 221399_at    | EDA2R          | -0,622910612 | -0,41858459  | -0,20432602 |  |
| 230415_at    | -              | -0,622910612 | -0,41858459  | -0,20432602 |  |
| 239221_at    | GPR123         | -0,622910612 | -0,41858459  | -0,20432602 |  |
| 241924_at    | MECP2          | -0,622910612 | -0,41858459  | -0,20432602 |  |
| 242383_at    | -              | -0,622910612 | -0,41858459  | -0,20432602 |  |
| 1555940_a_at | -              | -2,779459409 | -2,575129729 | -0,20432968 |  |
| 1556877_at   | -              | -2,779459409 | -2,575129729 | -0,20432968 |  |
| 1558724_at   | -              | -2,779459409 | -2,575129729 | -0,20432968 |  |
| 1560950_at   | HECW1-IT1      | -2,779459409 | -2,575129729 | -0,20432968 |  |
| 1561513_at   | -              | -2,779459409 | -2,575129729 | -0,20432968 |  |
| 1562499_at   | -              | -2,779459409 | -2,575129729 | -0,20432968 |  |
| 1563386_at   | -              | -2,779459409 | -2,575129729 | -0,20432968 |  |
| 1564514_at   | SNRK           | -2,779459409 | -2,575129729 | -0,20432968 |  |
| 1565776_at   | -              | -2,779459409 | -2,575129729 | -0,20432968 |  |
| 1568883_at   | -              | -2,779459409 | -2,575129729 | -0,20432968 |  |
| 206660_at    | IGLL1          | -2,779459409 | -2,575129729 | -0,20432968 |  |
| 220333_at    | PAQR5          | -2,779459409 | -2,575129729 | -0,20432968 |  |
| 233404_at    | -              | -2,779459409 | -2,575129729 | -0,20432968 |  |
| 233653_at    | -              | -2,779459409 | -2,575129729 | -0,20432968 |  |
| 234309_at    | TTY7 /// TTY7  | -2,779459409 | -2,575129729 | -0,20432968 |  |
| 236308_at    | VSTM2A         | -2,779459409 | -2,575129729 | -0,20432968 |  |
| 238625_at    | C1orf168       | -2,779459409 | -2,575129729 | -0,20432968 |  |
| 240709_at    | SEZ6L          | -2,779459409 | -2,575129729 | -0,20432968 |  |
| 243652_at    | -              | -2,779459409 | -2,575129729 | -0,20432968 |  |
| 244211_at    | -              | -2,779459409 | -2,575129729 | -0,20432968 |  |
| 231823_s_at  | SH3PXD2B       | 2,003776245  | 2,208167653  | -0,20439141 |  |
| 210337_s_at  | ACLY           | 3,28739962   | 3,491815843  | -0,20441622 |  |
| 201660_at    | ACSL3          | 2,38635068   | 2,590852465  | -0,20450178 |  |
| 206261_at    | ZNF239         | 1,523472489  | 1,728030156  | -0,20455767 |  |
| 222401_s_at  | TMEM50A        | 5,147729547  | 5,352321449  | -0,2045919  |  |
| 213186_at    | DZIP3          | 1,835789711  | 2,040470494  | -0,20468078 |  |
| 1568733_at   | C1orf76        | 0,384950573  | 0,589657387  | -0,20470681 |  |
| 217620_s_at  | PIK3CB         | 0,384950573  | 0,589657387  | -0,20470681 |  |
| 229603_at    | BBS12          | 0,384950573  | 0,589657387  | -0,20470681 |  |
| 211503_s_at  | RAB14          | 2,808702036  | 3,013449121  | -0,20474709 |  |
| 1552613_s_at | CDC42SE2       | 1,58584542   | 1,790660532  | -0,20481511 |  |
| 222122_s_at  | THOC2          | 3,520355937  | 3,725370335  | -0,2050144  |  |
| 1565754_x_at | FGD2           | -0,00073712  | 0,204310755  | -0,20504788 |  |
| 205682_x_at  | APOM           | -0,00073712  | 0,204310755  | -0,20504788 |  |
| 227999_at    | PWWP2B         | -0,00073712  | 0,204310755  | -0,20504788 |  |
| 230107_at    | -              | -0,00073712  | 0,204310755  | -0,20504788 |  |
| 235250_at    | FLCN           | -0,00073712  | 0,204310755  | -0,20504788 |  |
| 236599_at    | -              | -0,00073712  | 0,204310755  | -0,20504788 |  |
| 238708_at    | LOC386758      | 1,089278259  | 1,294497133  | -0,20521887 |  |
| 1558728_at   | LOC100128881   | 0,518867317  | 0,724100169  | -0,20523285 |  |
| 209511_at    | POLR2F         | 4,904191317  | 5,109532018  | -0,2053407  |  |
| 235358_at    | LOC728485      | 3,410096504  | 3,615478364  | -0,20538186 |  |

|              |              |              |              |             |  |
|--------------|--------------|--------------|--------------|-------------|--|
| 205283_at    | FKTN         | 0,228146222  | 0,433557298  | -0,20541108 |  |
| 229334_at    | RUFY3        | 0,228146222  | 0,433557298  | -0,20541108 |  |
| 39763_at     | HPX          | 0,581435402  | 0,786897721  | -0,20546232 |  |
| 1553459_at   | CCDC150      | -0,741668563 | -0,536087151 | -0,20558141 |  |
| 1556055_at   | -            | -0,741668563 | -0,536087151 | -0,20558141 |  |
| 1556538_at   | MFI2         | -0,741668563 | -0,536087151 | -0,20558141 |  |
| 205100_at    | GFPT2        | -0,741668563 | -0,536087151 | -0,20558141 |  |
| 230378_at    | SCGB3A1      | -0,741668563 | -0,536087151 | -0,20558141 |  |
| 232355_at    | SNORD114-3   | -0,741668563 | -0,536087151 | -0,20558141 |  |
| 206669_at    | GAD1         | 3,477451563  | 3,683073218  | -0,20562165 |  |
| 232340_at    | LOC100507637 | 1,143956113  | 1,349621332  | -0,20566522 |  |
| 204398_s_at  | EML2         | 0,171847695  | 0,377530647  | -0,20568295 |  |
| 238437_at    | ZNF805       | 0,171847695  | 0,377530647  | -0,20568295 |  |
| 207714_s_at  | SERPINH1     | 4,129607882  | 4,335292864  | -0,20568498 |  |
| 202320_at    | GTF3C1       | 2,352981171  | 2,558821855  | -0,20584068 |  |
| 221024_s_at  | SLC2A10      | 1,659347917  | 1,865308541  | -0,20596062 |  |
| 206138_s_at  | PI4KB        | 2,546213279  | 2,752192409  | -0,20597913 |  |
| 212542_s_at  | PHIP         | 3,84757742   | 4,053733117  | -0,2061557  |  |
| 1569200_at   | -            | 2,097427503  | 2,303602088  | -0,20617459 |  |
| 219458_s_at  | NSUN3        | 1,512180019  | 1,718396606  | -0,20621659 |  |
| 220647_s_at  | CHCHD8       | 4,61981709   | 4,826071067  | -0,20625398 |  |
| 47560_at     | LPHN1        | 1,859746653  | 2,066015817  | -0,20626916 |  |
| 1561254_at   | LOC340340    | -0,285837228 | -0,079522948 | -0,20631428 |  |
| 203842_s_at  | MAPRE3       | -0,285837228 | -0,079522948 | -0,20631428 |  |
| 207880_at    | ADAM11       | -0,285837228 | -0,079522948 | -0,20631428 |  |
| 207957_s_at  | PRKCB        | 3,90985831   | 4,116203325  | -0,20634501 |  |
| 228694_at    | -            | 1,751865623  | 1,958277216  | -0,20641159 |  |
| 202032_s_at  | MAN2A2       | 2,732900676  | 2,939363796  | -0,20646312 |  |
| 243256_at    | MKNK1        | 0,273439642  | 0,479907041  | -0,2064674  |  |
| 216035_x_at  | TCF7L2       | 2,396622324  | 2,603119255  | -0,20649693 |  |
| 225015_s_at  | STK40        | 0,46522187   | 0,67181667   | -0,2065948  |  |
| 1554149_at   | CLDND1       | 3,285189903  | 3,491815843  | -0,20662594 |  |
| 1561122_a_at | RAD51B       | -0,366776884 | -0,160136748 | -0,20664014 |  |
| 1564798_at   | -            | -0,366776884 | -0,160136748 | -0,20664014 |  |
| 1565894_at   | -            | -0,366776884 | -0,160136748 | -0,20664014 |  |
| 201893_x_at  | DCN          | -0,366776884 | -0,160136748 | -0,20664014 |  |
| 209718_at    | NCAPH2       | -0,366776884 | -0,160136748 | -0,20664014 |  |
| 237440_at    | -            | -0,366776884 | -0,160136748 | -0,20664014 |  |
| 240810_at    | MKNK1-AS1    | -0,366776884 | -0,160136748 | -0,20664014 |  |
| 201305_x_at  | ANP32B       | 5,963127359  | 6,16986151   | -0,20673415 |  |
| 1562505_at   | -            | -1,470833215 | -1,264005341 | -0,20682787 |  |
| 1562739_at   | LOC285593    | -1,470833215 | -1,264005341 | -0,20682787 |  |
| 205254_x_at  | TCF7         | -1,470833215 | -1,264005341 | -0,20682787 |  |
| 206986_at    | FGF18        | -1,470833215 | -1,264005341 | -0,20682787 |  |
| 207254_at    | SLC15A1      | -1,470833215 | -1,264005341 | -0,20682787 |  |
| 211348_s_at  | CDC14B       | -1,470833215 | -1,264005341 | -0,20682787 |  |
| 216880_at    | RAD51B       | -1,470833215 | -1,264005341 | -0,20682787 |  |
| 233678_at    | -            | -1,470833215 | -1,264005341 | -0,20682787 |  |
| 240102_at    | -            | -1,470833215 | -1,264005341 | -0,20682787 |  |
| 243505_at    | MAP3K3       | -1,470833215 | -1,264005341 | -0,20682787 |  |
| 244343_at    | LOC100507330 | -1,470833215 | -1,264005341 | -0,20682787 |  |
| 205705_at    | ANKRD26      | 0,417596971  | 0,624460759  | -0,20686379 |  |
| 244133_at    | USP49        | 0,417596971  | 0,624460759  | -0,20686379 |  |
| 225398_at    | RPUSD4       | 2,954882186  | 3,161800893  | -0,20691871 |  |
| 1565829_at   | KIAA1731     | -0,078265071 | 0,128747141  | -0,20701221 |  |
| 214322_at    | CAMK2G       | -0,078265071 | 0,128747141  | -0,20701221 |  |

|              |                |              |              |             |  |
|--------------|----------------|--------------|--------------|-------------|--|
| 221357_at    | CHRM4          | -0,078265071 | 0,128747141  | -0,20701221 |  |
| 231012_at    | SLC35G1        | -0,078265071 | 0,128747141  | -0,20701221 |  |
| 242842_at    | -              | -0,078265071 | 0,128747141  | -0,20701221 |  |
| 244577_at    | -              | -0,078265071 | 0,128747141  | -0,20701221 |  |
| 201255_x_at  | BAG6           | 4,353339172  | 4,560475791  | -0,20713662 |  |
| 217895_at    | PTCD3          | 3,972997622  | 4,180180181  | -0,20718256 |  |
| 208941_s_at  | SEPHS1         | 2,427005622  | 2,634191677  | -0,20718606 |  |
| 1554921_a_at | SCEL           | -3,054236653 | -2,847001814 | -0,20723484 |  |
| 1559264_at   | LOC286190      | -3,054236653 | -2,847001814 | -0,20723484 |  |
| 1559342_a_at | LOC100506948 / | -3,054236653 | -2,847001814 | -0,20723484 |  |
| 1560999_a_at | -              | -3,054236653 | -2,847001814 | -0,20723484 |  |
| 1562737_at   | -              | -3,054236653 | -2,847001814 | -0,20723484 |  |
| 201744_s_at  | LUM            | -3,054236653 | -2,847001814 | -0,20723484 |  |
| 205603_s_at  | DIAPH2         | -3,054236653 | -2,847001814 | -0,20723484 |  |
| 206432_at    | HAS2           | -3,054236653 | -2,847001814 | -0,20723484 |  |
| 206525_at    | GABRR1         | -3,054236653 | -2,847001814 | -0,20723484 |  |
| 216810_at    | KRTAP4-7       | -3,054236653 | -2,847001814 | -0,20723484 |  |
| 219313_at    | GRAMD1C        | -3,054236653 | -2,847001814 | -0,20723484 |  |
| 219619_at    | DIRAS2         | -3,054236653 | -2,847001814 | -0,20723484 |  |
| 227051_at    | -              | -3,054236653 | -2,847001814 | -0,20723484 |  |
| 228732_at    | GUCY1A2        | -3,054236653 | -2,847001814 | -0,20723484 |  |
| 230117_at    | VSTM2A         | -3,054236653 | -2,847001814 | -0,20723484 |  |
| 232332_at    | KIAA1210       | -3,054236653 | -2,847001814 | -0,20723484 |  |
| 233793_at    | -              | -3,054236653 | -2,847001814 | -0,20723484 |  |
| 234800_at    | -              | -3,054236653 | -2,847001814 | -0,20723484 |  |
| 236591_at    | LOC100505738   | -3,054236653 | -2,847001814 | -0,20723484 |  |
| 236824_at    | TMEM132B       | -3,054236653 | -2,847001814 | -0,20723484 |  |
| 239218_at    | PDE1C          | -3,054236653 | -2,847001814 | -0,20723484 |  |
| 244639_at    | -              | -3,054236653 | -2,847001814 | -0,20723484 |  |
| 219141_s_at  | AMBRA1         | 1,764611101  | 1,971855016  | -0,20724392 |  |
| 201226_at    | NDUFB8         | 5,299131275  | 5,506392234  | -0,20726096 |  |
| 1552299_at   | AKD1           | -1,026571149 | -0,819238336 | -0,20733281 |  |
| 1557406_s_at | LOC100130111   | -1,026571149 | -0,819238336 | -0,20733281 |  |
| 1560228_at   | SNAI3          | -1,026571149 | -0,819238336 | -0,20733281 |  |
| 1566099_at   | CD6            | -1,026571149 | -0,819238336 | -0,20733281 |  |
| 213807_x_at  | MET            | -1,026571149 | -0,819238336 | -0,20733281 |  |
| 221733_s_at  | GPATCH4        | -1,026571149 | -0,819238336 | -0,20733281 |  |
| 226912_at    | ZDHHC23        | -1,026571149 | -0,819238336 | -0,20733281 |  |
| 227023_at    | GLI4 /// ZFP41 | -1,026571149 | -0,819238336 | -0,20733281 |  |
| 228684_at    | ZNF503         | -1,026571149 | -0,819238336 | -0,20733281 |  |
| 232471_at    | -              | -1,026571149 | -0,819238336 | -0,20733281 |  |
| 240855_at    | -              | -1,026571149 | -0,819238336 | -0,20733281 |  |
| 242267_x_at  | -              | -1,026571149 | -0,819238336 | -0,20733281 |  |
| 244862_at    | -              | -1,026571149 | -0,819238336 | -0,20733281 |  |
| 1558212_at   | FLJ35024       | -0,148196756 | 0,059218869  | -0,20741562 |  |
| 202719_s_at  | TES            | -0,148196756 | 0,059218869  | -0,20741562 |  |
| 219102_at    | RCN3           | -0,148196756 | 0,059218869  | -0,20741562 |  |
| 231044_at    | C1orf194       | -0,148196756 | 0,059218869  | -0,20741562 |  |
| 232550_at    | ABHD1          | -0,148196756 | 0,059218869  | -0,20741562 |  |
| 239601_at    | -              | -0,148196756 | 0,059218869  | -0,20741562 |  |
| 222333_at    | ALS2CL         | 0,103263601  | 0,310717132  | -0,20745353 |  |
| 226023_at    | MAP2K7         | 0,103263601  | 0,310717132  | -0,20745353 |  |
| 234506_at    | -              | 0,103263601  | 0,310717132  | -0,20745353 |  |
| 1569291_at   | CROCCP2        | 1,073999308  | 1,281471383  | -0,20747208 |  |
| 201481_s_at  | PYGB           | 1,850809354  | 2,058399602  | -0,20759025 |  |
| 223111_x_at  | ARID4B         | 1,850809354  | 2,058399602  | -0,20759025 |  |

|              |                      |              |              |             |  |
|--------------|----------------------|--------------|--------------|-------------|--|
| 200042_at    | C22orf28             | 3,985300536  | 4,192989865  | -0,20768933 |  |
| 1553826_a_at | C16orf11             | 0,627515113  | 0,835239052  | -0,20772394 |  |
| 223424_s_at  | ZSCAN21              | 1,434549838  | 1,642321262  | -0,20777142 |  |
| 226015_at    | ZNF12                | 3,792633459  | 4,00040886   | -0,2077754  |  |
| 226320_at    | ALYREF               | 5,204228009  | 5,412058134  | -0,20783012 |  |
| 233893_s_at  | UVSSA                | 1,742232072  | 1,950068772  | -0,2078367  |  |
| 227540_at    | EEFSEC               | 1,129248302  | 1,337086025  | -0,20783772 |  |
| 1558215_s_at | UBTF                 | 1,210676994  | 1,418668082  | -0,20799109 |  |
| 202558_s_at  | HSPA13               | 3,127619759  | 3,335699198  | -0,20807944 |  |
| 235551_at    | WDR4                 | 0,209623097  | 0,417770464  | -0,20814737 |  |
| 244536_at    | -                    | 0,209623097  | 0,417770464  | -0,20814737 |  |
| 217914_at    | TPCN1                | 1,603688695  | 1,811954245  | -0,20826555 |  |
| 211715_s_at  | BDH1                 | 0,945567441  | 1,153866761  | -0,20829932 |  |
| 215764_x_at  | AP2A2                | 1,261018186  | 1,469325098  | -0,20830691 |  |
| 1552319_a_at | KLK8                 | -2,712026959 | -2,503677622 | -0,20834934 |  |
| 1552466_x_at | LINC00161            | -2,712026959 | -2,503677622 | -0,20834934 |  |
| 1552797_s_at | PROM2                | -2,712026959 | -2,503677622 | -0,20834934 |  |
| 1554640_at   | PALM2                | -2,712026959 | -2,503677622 | -0,20834934 |  |
| 1554996_at   | LOC643955 /// ZNF620 | -2,712026959 | -2,503677622 | -0,20834934 |  |
| 1558743_at   | ZNF620               | -2,712026959 | -2,503677622 | -0,20834934 |  |
| 1558977_at   | LOC100130992         | -2,712026959 | -2,503677622 | -0,20834934 |  |
| 1562467_at   | -                    | -2,712026959 | -2,503677622 | -0,20834934 |  |
| 1562604_at   | -                    | -2,712026959 | -2,503677622 | -0,20834934 |  |
| 1568449_at   | -                    | -2,712026959 | -2,503677622 | -0,20834934 |  |
| 1570054_at   | -                    | -2,712026959 | -2,503677622 | -0,20834934 |  |
| 213790_at    | ADAM12               | -2,712026959 | -2,503677622 | -0,20834934 |  |
| 217321_x_at  | ATXN3                | -2,712026959 | -2,503677622 | -0,20834934 |  |
| 217425_at    | -                    | -2,712026959 | -2,503677622 | -0,20834934 |  |
| 220416_at    | ATP8B4               | -2,712026959 | -2,503677622 | -0,20834934 |  |
| 231666_at    | PAX3                 | -2,712026959 | -2,503677622 | -0,20834934 |  |
| 233464_at    | BCL2L14              | -2,712026959 | -2,503677622 | -0,20834934 |  |
| 239788_at    | -                    | -2,712026959 | -2,503677622 | -0,20834934 |  |
| 241740_at    | -                    | -2,712026959 | -2,503677622 | -0,20834934 |  |
| 244065_at    | LOC643792            | -2,712026959 | -2,503677622 | -0,20834934 |  |
| 244521_at    | TSHZ2                | -2,712026959 | -2,503677622 | -0,20834934 |  |
| 212124_at    | ZMIZ1                | 3,784051878  | 3,992437318  | -0,20838544 |  |
| 239137_x_at  | C6orf223             | 0,359971644  | 0,568365095  | -0,20839345 |  |
| 227895_at    | FAM120B              | 1,037706275  | 1,246149888  | -0,20844361 |  |
| 1555920_at   | CBX3                 | 0,792179257  | 1,000684521  | -0,20850526 |  |
| 226476_s_at  | VPRBP                | 0,792179257  | 1,000684521  | -0,20850526 |  |
| 204817_at    | ESPL1                | 2,764969948  | 2,973511251  | -0,2085413  |  |
| 201499_s_at  | USP7                 | 3,983257322  | 4,191830037  | -0,20857271 |  |
| 228906_at    | TET1                 | 1,699726954  | 1,908311039  | -0,20858408 |  |
| 209063_x_at  | PAIP1                | 3,446146386  | 3,654731437  | -0,20858505 |  |
| 227859_at    | DNAJC27              | 0,496120222  | 0,704715219  | -0,208595   |  |
| 1557329_at   | -                    | -0,888496123 | -0,679763839 | -0,20873228 |  |
| 1558007_s_at | LOC100506655         | -0,888496123 | -0,679763839 | -0,20873228 |  |
| 1562661_at   | -                    | -0,888496123 | -0,679763839 | -0,20873228 |  |
| 231511_at    | FRAS1                | -0,888496123 | -0,679763839 | -0,20873228 |  |
| 233824_at    | -                    | -0,888496123 | -0,679763839 | -0,20873228 |  |
| 237412_at    | -                    | -0,888496123 | -0,679763839 | -0,20873228 |  |
| 241431_at    | LOC100507077         | -0,888496123 | -0,679763839 | -0,20873228 |  |
| 243766_s_at  | TEAD2                | -0,888496123 | -0,679763839 | -0,20873228 |  |
| 212777_at    | SOS1                 | 0,30867765   | 0,51742585   | -0,2087482  |  |
| 224083_s_at  | PRO1596              | -3,482633686 | -3,273861381 | -0,2087723  |  |
| 200756_x_at  | CALU                 | 4,227797443  | 4,436691079  | -0,20889364 |  |

|              |                  |              |              |             |  |
|--------------|------------------|--------------|--------------|-------------|--|
| 220690_s_at  | DHRS7B           | 2,003776245  | 2,212749286  | -0,20897304 |  |
| 210481_s_at  | CLEC4M           | -0,467091869 | -0,258114234 | -0,20897764 |  |
| 215095_at    | -                | -0,467091869 | -0,258114234 | -0,20897764 |  |
| 224442_at    | PHF6             | -0,467091869 | -0,258114234 | -0,20897764 |  |
| 226424_at    | CAPS             | -0,467091869 | -0,258114234 | -0,20897764 |  |
| 233358_at    | -                | -0,467091869 | -0,258114234 | -0,20897764 |  |
| 238052_at    | -                | -0,467091869 | -0,258114234 | -0,20897764 |  |
| 240241_at    | -                | -0,467091869 | -0,258114234 | -0,20897764 |  |
| 206495_s_at  | HINFP            | 2,243430036  | 2,452428893  | -0,20899886 |  |
| 204881_s_at  | UGCG             | 3,236843482  | 3,445853256  | -0,20900977 |  |
| 213526_s_at  | LIN37            | 3,01878441   | 3,227795991  | -0,20901158 |  |
| 200886_s_at  | PGAM1            | 6,881166284  | 7,090184335  | -0,20901805 |  |
| 206452_x_at  | PPP2R4           | 1,493160564  | 1,702196344  | -0,20903578 |  |
| 210142_x_at  | FLOT1            | 3,294008537  | 3,503081281  | -0,20907274 |  |
| 211426_x_at  | GNAQ             | 1,874520207  | 2,083632167  | -0,20911196 |  |
| 224857_s_at  | POLR1D           | 3,408067074  | 3,617207412  | -0,20914034 |  |
| 227602_at    | RAB7A            | 0,695652136  | 0,904843258  | -0,20919112 |  |
| 236571_at    | -                | 0,695652136  | 0,904843258  | -0,20919112 |  |
| 200901_s_at  | M6PR             | 4,363324083  | 4,572556959  | -0,20923288 |  |
| 244811_at    | PHIP             | 2,292660284  | 2,501934108  | -0,20927382 |  |
| 223566_s_at  | BCOR             | 2,446911392  | 2,656223838  | -0,20931245 |  |
| 215148_s_at  | APBA3            | 1,655931423  | 1,865308541  | -0,20937712 |  |
| 208815_x_at  | HSPA4            | 5,363121463  | 5,572607368  | -0,2094859  |  |
| 232597_x_at  | SCAF11           | 2,522021211  | 2,731588328  | -0,20956712 |  |
| 229447_x_at  | LOC100506032 /   | 4,56121151   | 4,770829129  | -0,20961762 |  |
| 203565_s_at  | MNAT1            | 3,302773593  | 3,512402411  | -0,20962882 |  |
| 203589_s_at  | TFDP2            | 0,87091093   | 1,080561626  | -0,2096507  |  |
| 224368_s_at  | NDRG3            | 0,87091093   | 1,080561626  | -0,2096507  |  |
| 227106_at    | TMEM198B         | 0,87091093   | 1,080561626  | -0,2096507  |  |
| 209945_s_at  | GSK3B            | 1,251994932  | 1,461646549  | -0,20965162 |  |
| 210896_s_at  | ASPH             | 1,251994932  | 1,461646549  | -0,20965162 |  |
| 1554079_at   | GALNTL4          | -0,234278768 | -0,024572586 | -0,20970618 |  |
| 214850_at    | LOC100170939     | -0,234278768 | -0,024572586 | -0,20970618 |  |
| 216207_x_at  | IGKC /// LOC642  | -0,234278768 | -0,024572586 | -0,20970618 |  |
| 221036_s_at  | APH1B            | -0,234278768 | -0,024572586 | -0,20970618 |  |
| 221292_at    | PTCH2            | -0,234278768 | -0,024572586 | -0,20970618 |  |
| 230290_at    | SCUBE3           | -0,234278768 | -0,024572586 | -0,20970618 |  |
| 242775_at    | -                | -0,234278768 | -0,024572586 | -0,20970618 |  |
| 210009_s_at  | GOSR2            | 1,46610492   | 1,675891488  | -0,20978657 |  |
| 1558290_a_at | MIR1204 /// PVT  | 5,369653912  | 5,579497176  | -0,20984326 |  |
| 201946_s_at  | CCT2             | 5,544617001  | 5,754469248  | -0,20985225 |  |
| 208819_at    | RAB8A            | 5,486057872  | 5,695950089  | -0,20989222 |  |
| 1559204_x_at | KRAS             | -0,033456564 | 0,176436073  | -0,20989264 |  |
| 1561538_at   | -                | -0,033456564 | 0,176436073  | -0,20989264 |  |
| 219550_at    | ROBO3            | -0,033456564 | 0,176436073  | -0,20989264 |  |
| 235444_at    | FOXP1            | -0,033456564 | 0,176436073  | -0,20989264 |  |
| 238640_at    | C1orf212         | -0,033456564 | 0,176436073  | -0,20989264 |  |
| 235190_at    | -                | 2,997346717  | 3,207279726  | -0,20993301 |  |
| 213754_s_at  | PAIP1            | 3,19743497   | 3,407399455  | -0,20996448 |  |
| 211582_x_at  | LST1             | 0,934330293  | 1,144305291  | -0,209975   |  |
| 220349_s_at  | ENGASE           | 0,934330293  | 1,144305291  | -0,209975   |  |
| 228539_at    | -                | 0,934330293  | 1,144305291  | -0,209975   |  |
| 209921_at    | SLC7A11          | 2,718233611  | 2,928263672  | -0,21003006 |  |
| 211734_s_at  | FCER1A           | 4,354920338  | 4,564962102  | -0,21004176 |  |
| 215346_at    | CD40             | 1,114389003  | 1,324440845  | -0,21005184 |  |
| 230381_at    | C1orf186 /// LOC | 1,114389003  | 1,324440845  | -0,21005184 |  |

|              |                 |              |              |             |  |
|--------------|-----------------|--------------|--------------|-------------|--|
| 240336_at    | HBM             | 1,631786706  | 1,841838775  | -0,21005207 |  |
| 208900_s_at  | TOP1            | 4,257970041  | 4,468168179  | -0,21019814 |  |
| 229694_at    | WDR11           | 1,168140757  | 1,378453643  | -0,21031289 |  |
| 226511_at    | DCAF10          | 1,649074067  | 1,859476797  | -0,21040273 |  |
| 218570_at    | KBTBD4 /// PTPN | 1,814495998  | 2,024923328  | -0,21042733 |  |
| 210515_at    | HNF1A           | 0,083054335  | 0,293518836  | -0,2104645  |  |
| 210879_s_at  | RAB11FIP5       | 0,083054335  | 0,293518836  | -0,2104645  |  |
| 236471_at    | NFE2L3          | 0,083054335  | 0,293518836  | -0,2104645  |  |
| 209405_s_at  | FAM3A           | 0,246434561  | 0,456918297  | -0,21048374 |  |
| 227791_at    | SLC9A9          | 0,246434561  | 0,456918297  | -0,21048374 |  |
| 230320_at    | TBRG1           | 0,246434561  | 0,456918297  | -0,21048374 |  |
| 242933_at    | -               | 0,246434561  | 0,456918297  | -0,21048374 |  |
| 1553398_at   | -               | -2,667025278 | -2,456406426 | -0,21061885 |  |
| 1553864_at   | GPR26           | -2,667025278 | -2,456406426 | -0,21061885 |  |
| 1558493_at   | CSTT            | -2,667025278 | -2,456406426 | -0,21061885 |  |
| 1559053_at   | -               | -2,667025278 | -2,456406426 | -0,21061885 |  |
| 1569830_at   | PTPRC           | -2,667025278 | -2,456406426 | -0,21061885 |  |
| 207477_at    | -               | -2,667025278 | -2,456406426 | -0,21061885 |  |
| 208402_at    | IL17A           | -2,667025278 | -2,456406426 | -0,21061885 |  |
| 215666_at    | HLA-DRB4        | -2,667025278 | -2,456406426 | -0,21061885 |  |
| 216808_at    | MIR622          | -2,667025278 | -2,456406426 | -0,21061885 |  |
| 218736_s_at  | PALMD           | -2,667025278 | -2,456406426 | -0,21061885 |  |
| 220146_at    | TLR7            | -2,667025278 | -2,456406426 | -0,21061885 |  |
| 220168_at    | CASC1           | -2,667025278 | -2,456406426 | -0,21061885 |  |
| 223753_s_at  | CFC1 /// CFC1B  | -2,667025278 | -2,456406426 | -0,21061885 |  |
| 223825_at    | KIAA1432        | -2,667025278 | -2,456406426 | -0,21061885 |  |
| 224269_at    | KRTAP4-12       | -2,667025278 | -2,456406426 | -0,21061885 |  |
| 229214_at    | -               | -2,667025278 | -2,456406426 | -0,21061885 |  |
| 229479_at    | -               | -2,667025278 | -2,456406426 | -0,21061885 |  |
| 230220_at    | UNC80           | -2,667025278 | -2,456406426 | -0,21061885 |  |
| 230624_at    | SLC25A27        | -2,667025278 | -2,456406426 | -0,21061885 |  |
| 231344_at    | -               | -2,667025278 | -2,456406426 | -0,21061885 |  |
| 237700_at    | -               | -2,667025278 | -2,456406426 | -0,21061885 |  |
| 239556_at    | -               | -2,667025278 | -2,456406426 | -0,21061885 |  |
| 240580_at    | -               | -2,667025278 | -2,456406426 | -0,21061885 |  |
| 240663_at    | -               | -2,667025278 | -2,456406426 | -0,21061885 |  |
| 242112_at    | LSM11           | -2,667025278 | -2,456406426 | -0,21061885 |  |
| 244750_at    | -               | -2,667025278 | -2,456406426 | -0,21061885 |  |
| 227962_at    | ACOX1           | 3,000043914  | 3,210719429  | -0,21067551 |  |
| 202955_s_at  | ARFGEF1         | 2,151803104  | 2,362515214  | -0,21071211 |  |
| 216671_x_at  | MUC8            | 0,606430281  | 0,817300337  | -0,21087006 |  |
| 216488_s_at  | ATP11A          | 0,480753764  | 0,691645685  | -0,21089192 |  |
| 241640_at    | BCAP29          | 0,480753764  | 0,691645685  | -0,21089192 |  |
| 201221_s_at  | SNRNP70         | 3,9480725    | 4,158970399  | -0,2108979  |  |
| 228408_s_at  | SDAD1           | 3,870604295  | 4,08155382   | -0,21094952 |  |
| 222906_at    | FLVCR1          | 1,683039483  | 1,894118818  | -0,21107934 |  |
| 202297_s_at  | RER1            | 3,890364806  | 4,101455318  | -0,21109051 |  |
| 217501_at    | CIAO1           | 1,62481334   | 1,835911187  | -0,21109785 |  |
| 212894_at    | SUPV3L1         | 3,121439986  | 3,332545245  | -0,21110526 |  |
| 231793_s_at  | CAMK2D          | 0,682279745  | 0,893473268  | -0,21119352 |  |
| 218628_at    | CCDC53          | 1,774096855  | 1,98530622   | -0,21120936 |  |
| 242824_at    | -               | 1,774096855  | 1,98530622   | -0,21120936 |  |
| 1555688_s_at | SLA2            | -0,67289328  | -0,461594427 | -0,21129885 |  |
| 207919_at    | ART1            | -0,67289328  | -0,461594427 | -0,21129885 |  |
| 213412_at    | TJP3            | -0,67289328  | -0,461594427 | -0,21129885 |  |
| 215525_at    | -               | -0,67289328  | -0,461594427 | -0,21129885 |  |

|              |                |              |              |             |  |
|--------------|----------------|--------------|--------------|-------------|--|
| 227850_x_at  | CDC42EP5       | -0,67289328  | -0,461594427 | -0,21129885 |  |
| 234195_at    | TNFRSF10C      | -0,67289328  | -0,461594427 | -0,21129885 |  |
| 237234_at    | CYTH2          | -0,67289328  | -0,461594427 | -0,21129885 |  |
| 1552326_a_at | CCDC11         | -1,543331864 | -1,332017329 | -0,21131454 |  |
| 1555248_a_at | WNK3           | -1,543331864 | -1,332017329 | -0,21131454 |  |
| 1556947_at   | -              | -1,543331864 | -1,332017329 | -0,21131454 |  |
| 1557491_at   | LOC100240728   | -1,543331864 | -1,332017329 | -0,21131454 |  |
| 1558348_at   | -              | -1,543331864 | -1,332017329 | -0,21131454 |  |
| 1558437_at   | IGHA1          | -1,543331864 | -1,332017329 | -0,21131454 |  |
| 1562544_at   | -              | -1,543331864 | -1,332017329 | -0,21131454 |  |
| 206718_at    | LMO1           | -1,543331864 | -1,332017329 | -0,21131454 |  |
| 207656_s_at  | ACOX1          | -1,543331864 | -1,332017329 | -0,21131454 |  |
| 213631_x_at  | DHODH          | -1,543331864 | -1,332017329 | -0,21131454 |  |
| 215247_at    | -              | -1,543331864 | -1,332017329 | -0,21131454 |  |
| 216154_at    | -              | -1,543331864 | -1,332017329 | -0,21131454 |  |
| 236391_at    | -              | -1,543331864 | -1,332017329 | -0,21131454 |  |
| 241288_at    | -              | -1,543331864 | -1,332017329 | -0,21131454 |  |
| 241623_at    | PTPN2          | -1,543331864 | -1,332017329 | -0,21131454 |  |
| 203965_at    | USP20          | 1,04816921   | 1,259496994  | -0,21132778 |  |
| 242865_at    | -              | 1,04816921   | 1,259496994  | -0,21132778 |  |
| 222140_s_at  | GPR89A /// GPR | 2,987866617  | 3,199221717  | -0,2113551  |  |
| 211949_s_at  | NOLC1          | 2,661438684  | 2,87289275   | -0,21145407 |  |
| 225097_at    | HIPK2          | 3,139900454  | 3,351366359  | -0,21146591 |  |
| 210792_x_at  | SIVA1          | 4,511983428  | 4,723455756  | -0,21147233 |  |
| 203643_at    | ERF            | 1,454352496  | 1,665902186  | -0,21154969 |  |
| 222452_s_at  | GPBP1L1        | 2,849652795  | 3,061230246  | -0,21157745 |  |
| 219426_at    | EIF2C3         | 1,314003737  | 1,525647381  | -0,21164364 |  |
| 219036_at    | CEP70          | 2,001086023  | 2,212749286  | -0,21166326 |  |
| 205865_at    | ARID3A         | 1,360921491  | 1,572742379  | -0,21182089 |  |
| 201938_at    | CDK2AP1        | 5,064816122  | 5,276663999  | -0,21184788 |  |
| 232683_s_at  | PARP6          | 1,473887017  | 1,685812099  | -0,21192508 |  |
| 243286_at    | -              | 1,473887017  | 1,685812099  | -0,21192508 |  |
| 229713_at    | PIP4K2A        | 2,2992452    | 2,511262629  | -0,21201743 |  |
| 231876_at    | TRIM56         | 1,515954005  | 1,728030156  | -0,21207615 |  |
| 1556060_a_at | ZNF451         | 5,052201321  | 5,26430332   | -0,212102   |  |
| 222872_x_at  | NABP1          | 3,411111015  | 3,623242814  | -0,21213266 |  |
| 205628_at    | PRIM2          | 2,382221458  | 2,594367918  | -0,21214646 |  |
| 236126_at    | ACVR2B         | 1,903621061  | 2,115788273  | -0,21216721 |  |
| 231904_at    | U2AF1          | 2,546213279  | 2,758473378  | -0,2122601  |  |
| 219286_s_at  | RBM15          | 4,281994342  | 4,494276519  | -0,21228218 |  |
| 200076_s_at  | KXD1           | 4,085209408  | 4,297510916  | -0,21230151 |  |
| 1560773_at   | DLGAP1         | -3,448416261 | -3,236070201 | -0,21234606 |  |
| 1566749_at   | -              | -3,448416261 | -3,236070201 | -0,21234606 |  |
| 203722_at    | ALDH4A1        | 0,181384709  | 0,393761504  | -0,2123768  |  |
| 236958_at    | -              | 0,747935635  | 0,960386719  | -0,21245108 |  |
| 224579_at    | SLC38A1        | 4,236401075  | 4,448879066  | -0,21247799 |  |
| 1558762_a_at | ZNF789         | 0,425644434  | 0,638150376  | -0,21250594 |  |
| 210043_at    | FRMD8          | 0,425644434  | 0,638150376  | -0,21250594 |  |
| 241233_x_at  | ANKRD20A11P    | 0,425644434  | 0,638150376  | -0,21250594 |  |
| 1559275_x_at | ZNF732         | -3,250025915 | -3,037500868 | -0,21252505 |  |
| 1559833_at   | ARHGEF12       | -3,250025915 | -3,037500868 | -0,21252505 |  |
| 1561244_at   | -              | -3,250025915 | -3,037500868 | -0,21252505 |  |
| 1569881_at   | DRP2           | -3,250025915 | -3,037500868 | -0,21252505 |  |
| 222196_at    | LOC389906      | -3,250025915 | -3,037500868 | -0,21252505 |  |
| 228202_at    | -              | -3,250025915 | -3,037500868 | -0,21252505 |  |
| 240364_at    | -              | -3,250025915 | -3,037500868 | -0,21252505 |  |



|              |                 |              |              |             |  |
|--------------|-----------------|--------------|--------------|-------------|--|
| 244483_at    | -               | -3,250025915 | -3,037500868 | -0,21252505 |  |
| 223488_s_at  | GNB4            | 2,139623739  | 2,352169913  | -0,21254617 |  |
| 217726_at    | COPZ1           | 3,523171367  | 3,735753654  | -0,21258229 |  |
| 224872_at    | DIP2B           | 4,138815532  | 4,351483879  | -0,21266835 |  |
| 218049_s_at  | LOC100506980 /  | 5,334289212  | 5,546983851  | -0,21269464 |  |
| 201485_s_at  | RCN2            | 3,237986416  | 3,450709925  | -0,21272351 |  |
| 226751_at    | CNRIP1          | 5,609748295  | 5,822558197  | -0,2128099  |  |
| 211546_x_at  | SNCA            | 2,763383302  | 2,976208448  | -0,21282515 |  |
| 203086_at    | KIF2A           | 1,593009234  | 1,805902329  | -0,2128931  |  |
| 225802_at    | TOP1MT          | 4,387215694  | 4,600140481  | -0,21292479 |  |
| 222264_at    | HNRNPUL2        | 1,177702228  | 1,390636111  | -0,21293388 |  |
| 210864_x_at  | HFE             | 0,123193849  | 0,336136178  | -0,21294233 |  |
| 234562_x_at  | -               | 0,123193849  | 0,336136178  | -0,21294233 |  |
| 225743_at    | RPUSD3          | 2,094906514  | 2,307890888  | -0,21298437 |  |
| 1554202_x_at | CABP4           | 0,376672223  | 0,589657387  | -0,21298516 |  |
| 218261_at    | AP1M2           | 0,376672223  | 0,589657387  | -0,21298516 |  |
| 227469_at    | PTEN            | 0,592200562  | 0,805216064  | -0,2130155  |  |
| 218945_at    | METTL22         | 2,433006244  | 2,646096941  | -0,2130907  |  |
| 219269_at    | HMBOX1          | 3,32230241   | 3,535445117  | -0,21314271 |  |
| 1568763_s_at | LOC728613 /// P | 3,645356455  | 3,858511405  | -0,21315495 |  |
| 226150_at    | PPAPDC1B        | 2,580856819  | 2,794067719  | -0,2132109  |  |
| 1556033_at   | FLJ39739        | -0,055687482 | 0,157549243  | -0,21323672 |  |
| 219225_at    | PGBD5           | -0,055687482 | 0,157549243  | -0,21323672 |  |
| 227463_at    | ACE             | -0,055687482 | 0,157549243  | -0,21323672 |  |
| 232045_at    | PHACTR1         | -0,055687482 | 0,157549243  | -0,21323672 |  |
| 234494_x_at  | -               | -0,055687482 | 0,157549243  | -0,21323672 |  |
| 241300_at    | -               | -0,055687482 | 0,157549243  | -0,21323672 |  |
| 205320_at    | APC2            | -0,496991414 | -0,283667828 | -0,21332359 |  |
| 211240_x_at  | CTNND1 /// TMX  | -0,496991414 | -0,283667828 | -0,21332359 |  |
| 215047_at    | TRIM58          | -0,496991414 | -0,283667828 | -0,21332359 |  |
| 230826_at    | MMD2            | -0,496991414 | -0,283667828 | -0,21332359 |  |
| 232077_s_at  | YPEL3           | -0,496991414 | -0,283667828 | -0,21332359 |  |
| 232469_x_at  | C1orf191        | -0,496991414 | -0,283667828 | -0,21332359 |  |
| 236372_at    | -               | -0,496991414 | -0,283667828 | -0,21332359 |  |
| 236494_x_at  | -               | -0,496991414 | -0,283667828 | -0,21332359 |  |
| 239041_at    | HIST1H2AK       | -0,496991414 | -0,283667828 | -0,21332359 |  |
| 217492_s_at  | PTEN /// PTENP  | 3,356380711  | 3,569779975  | -0,21339926 |  |
| 230326_s_at  | C11orf73        | 4,543294018  | 4,756779735  | -0,21348572 |  |
| 201907_x_at  | DVL3            | -0,259832361 | -0,046302147 | -0,21353021 |  |
| 230475_at    | C15orf59        | -0,259832361 | -0,046302147 | -0,21353021 |  |
| 236358_at    | -               | -0,259832361 | -0,046302147 | -0,21353021 |  |
| 214672_at    | TTLL5           | 2,061726373  | 2,275409734  | -0,21368336 |  |
| 1552611_a_at | JAK1            | 1,987559146  | 2,201267805  | -0,21370866 |  |
| 202750_s_at  | TFIP11          | 3,294008537  | 3,507749374  | -0,21374084 |  |
| 217824_at    | UBE2J1          | 1,607231019  | 1,820984782  | -0,21375376 |  |
| 228410_at    | GAB3            | 1,089278259  | 1,303116084  | -0,21383783 |  |
| 1555309_a_at | CARD14          | -1,591296941 | -1,377419394 | -0,21387755 |  |
| 1558189_a_at | LOC284570       | -1,591296941 | -1,377419394 | -0,21387755 |  |
| 1560212_a_at | -               | -1,591296941 | -1,377419394 | -0,21387755 |  |
| 1560871_a_at | -               | -1,591296941 | -1,377419394 | -0,21387755 |  |
| 1562100_at   | -               | -1,591296941 | -1,377419394 | -0,21387755 |  |
| 214576_at    | KRT36           | -1,591296941 | -1,377419394 | -0,21387755 |  |
| 223579_s_at  | APOB            | -1,591296941 | -1,377419394 | -0,21387755 |  |
| 224306_at    | NPC1L1          | -1,591296941 | -1,377419394 | -0,21387755 |  |
| 224534_at    | KREMEN1         | -1,591296941 | -1,377419394 | -0,21387755 |  |
| 228112_at    | DNAH1           | -1,591296941 | -1,377419394 | -0,21387755 |  |

|              |                |              |              |             |  |
|--------------|----------------|--------------|--------------|-------------|--|
| 243391_x_at  | -              | -1,591296941 | -1,377419394 | -0,21387755 |  |
| 243433_at    | -              | -1,591296941 | -1,377419394 | -0,21387755 |  |
| 222883_at    | SELRC1         | 3,123915073  | 3,337798009  | -0,21388294 |  |
| 226441_at    | MAP3K2         | 0,841135803  | 1,055274826  | -0,21413902 |  |
| 200905_x_at  | HLA-E          | 5,78926129   | 6,003499051  | -0,21423776 |  |
| 1554043_a_at | -              | 1,968405881  | 2,182705233  | -0,21429935 |  |
| 216187_x_at  | -              | 4,082030648  | 4,296432174  | -0,21440153 |  |
| 1570330_at   | -              | 0,457392764  | 0,67181667   | -0,21442391 |  |
| 235266_at    | ATAD2          | 1,805273023  | 2,019703483  | -0,21443046 |  |
| 1563919_a_at | CEP89          | 0,541261317  | 0,755840599  | -0,21457928 |  |
| 220053_at    | GDF3           | 0,541261317  | 0,755840599  | -0,21457928 |  |
| 229555_at    | GALNT5         | 2,466546243  | 2,681234383  | -0,21468814 |  |
| 1558620_at   | ZNF621         | 1,560488174  | 1,775255987  | -0,21476781 |  |
| 228460_at    | ZNF319         | 0,317354302  | 0,532164371  | -0,21481007 |  |
| 207147_at    | DLX2           | 0,052199481  | 0,26733076   | -0,21513128 |  |
| 218688_at    | DAK            | 0,052199481  | 0,26733076   | -0,21513128 |  |
| 234327_at    | -              | 0,052199481  | 0,26733076   | -0,21513128 |  |
| 238853_at    | RAB3IP         | 0,052199481  | 0,26733076   | -0,21513128 |  |
| 243640_x_at  | -              | 0,052199481  | 0,26733076   | -0,21513128 |  |
| 213502_x_at  | GUSBP11        | 0,962260738  | 1,177496821  | -0,21523608 |  |
| 203391_at    | FKBP2          | 2,764969948  | 2,980244813  | -0,21527486 |  |
| 240097_at    | -              | 1,021868205  | 1,23718272   | -0,21531451 |  |
| 213600_at    | SIPA1L3        | 1,764611101  | 1,979940779  | -0,21532968 |  |
| 208082_x_at  | -              | 3,301680869  | 3,517040489  | -0,21535962 |  |
| 214728_x_at  | SMARCA4        | 6,169940488  | 6,385320732  | -0,21538024 |  |
| 219013_at    | GALNT11        | 2,882181479  | 3,09760452   | -0,21542304 |  |
| 225863_s_at  | C19orf12       | 3,354274239  | 3,569779975  | -0,21550574 |  |
| 216310_at    | TAOK1          | 0,928678725  | 1,144305291  | -0,21562657 |  |
| 206508_at    | CD70           | -0,136301282 | 0,079428135  | -0,21572942 |  |
| 236078_at    | KIAA1609       | -0,136301282 | 0,079428135  | -0,21572942 |  |
| 238994_at    | OTUD7B         | -0,136301282 | 0,079428135  | -0,21572942 |  |
| 244193_at    | DNAJC22        | -0,136301282 | 0,079428135  | -0,21572942 |  |
| 209177_at    | NDUFAF3        | 2,369762403  | 2,585563171  | -0,21580077 |  |
| 201526_at    | ARF5           | 3,527851575  | 3,743690278  | -0,2158387  |  |
| 1561280_at   | LEMD1-AS1      | -3,212234735 | -2,996335703 | -0,21589903 |  |
| 1561414_at   | LOC401497      | -3,212234735 | -2,996335703 | -0,21589903 |  |
| 1564964_at   | -              | -3,212234735 | -2,996335703 | -0,21589903 |  |
| 1569823_at   | LOC440346      | -3,212234735 | -2,996335703 | -0,21589903 |  |
| 207461_at    | -              | -3,212234735 | -2,996335703 | -0,21589903 |  |
| 235183_at    | -              | -3,212234735 | -2,996335703 | -0,21589903 |  |
| 237384_x_at  | -              | -3,212234735 | -2,996335703 | -0,21589903 |  |
| 241014_at    | FLG-AS1        | -3,212234735 | -2,996335703 | -0,21589903 |  |
| 241135_at    | -              | -3,212234735 | -2,996335703 | -0,21589903 |  |
| 243997_x_at  | -              | -3,212234735 | -2,996335703 | -0,21589903 |  |
| 205760_s_at  | OGG1           | 0,760715727  | 0,976641161  | -0,21592543 |  |
| 213336_at    | BAZ1B          | 0,760715727  | 0,976641161  | -0,21592543 |  |
| 202919_at    | MOB4           | 3,457965575  | 3,673964604  | -0,21599903 |  |
| 1557189_at   | DNASE1         | -0,706943342 | -0,490927335 | -0,21601601 |  |
| 1559754_at   | LTB            | -0,706943342 | -0,490927335 | -0,21601601 |  |
| 1568807_a_at | RBM26-AS1      | -0,706943342 | -0,490927335 | -0,21601601 |  |
| 227743_at    | MYO15B         | -0,706943342 | -0,490927335 | -0,21601601 |  |
| 236557_at    | ZBTB38         | -0,706943342 | -0,490927335 | -0,21601601 |  |
| 203359_s_at  | GJA9-MYCBP /// | 3,882346871  | 4,098363749  | -0,21601688 |  |
| 201770_at    | SNRPA          | 3,890364806  | 4,106388091  | -0,21602329 |  |
| 217943_s_at  | MAP7D1         | 2,247975581  | 2,464004877  | -0,2160293  |  |
| 1552266_at   | ADAM32         | -0,946847173 | -0,730778808 | -0,21606837 |  |

|              |                |              |              |             |  |
|--------------|----------------|--------------|--------------|-------------|--|
| 1563426_a_at | -              | -0,946847173 | -0,730778808 | -0,21606837 |  |
| 202267_at    | LAMC2          | -0,946847173 | -0,730778808 | -0,21606837 |  |
| 208357_x_at  | CSH1           | -0,946847173 | -0,730778808 | -0,21606837 |  |
| 214939_x_at  | MLLT4          | -0,946847173 | -0,730778808 | -0,21606837 |  |
| 217592_at    | ZSWIM1         | -0,946847173 | -0,730778808 | -0,21606837 |  |
| 219632_s_at  | SHPK /// TRPV1 | -0,946847173 | -0,730778808 | -0,21606837 |  |
| 223094_s_at  | ANKH           | -0,946847173 | -0,730778808 | -0,21606837 |  |
| 227645_at    | PIK3R5         | -0,946847173 | -0,730778808 | -0,21606837 |  |
| 232641_at    | ZNF596         | -0,946847173 | -0,730778808 | -0,21606837 |  |
| 238003_at    | HEPACAM /// HE | -0,946847173 | -0,730778808 | -0,21606837 |  |
| 243287_s_at  | OSTM1          | -0,946847173 | -0,730778808 | -0,21606837 |  |
| 203272_s_at  | TUSC2          | 2,750626925  | 2,966746113  | -0,21611919 |  |
| 212718_at    | PAPOLA         | 6,0562932    | 6,272449411  | -0,21615621 |  |
| 1557602_at   | LOC201617      | -2,551294263 | -2,335104118 | -0,21619014 |  |
| 1560240_at   | -              | -2,551294263 | -2,335104118 | -0,21619014 |  |
| 1562905_at   | -              | -2,551294263 | -2,335104118 | -0,21619014 |  |
| 1564360_a_at | LOC339260      | -2,551294263 | -2,335104118 | -0,21619014 |  |
| 1566204_at   | -              | -2,551294263 | -2,335104118 | -0,21619014 |  |
| 208123_at    | KCNB2          | -2,551294263 | -2,335104118 | -0,21619014 |  |
| 209347_s_at  | MAF            | -2,551294263 | -2,335104118 | -0,21619014 |  |
| 210576_at    | CYP4F8         | -2,551294263 | -2,335104118 | -0,21619014 |  |
| 220794_at    | GREM2          | -2,551294263 | -2,335104118 | -0,21619014 |  |
| 232318_s_at  | LINC00284      | -2,551294263 | -2,335104118 | -0,21619014 |  |
| 232598_at    | NUP210L        | -2,551294263 | -2,335104118 | -0,21619014 |  |
| 234220_at    | CADPS          | -2,551294263 | -2,335104118 | -0,21619014 |  |
| 234288_at    | -              | -2,551294263 | -2,335104118 | -0,21619014 |  |
| 234396_at    | -              | -2,551294263 | -2,335104118 | -0,21619014 |  |
| 234868_s_at  | GFRA4          | -2,551294263 | -2,335104118 | -0,21619014 |  |
| 237860_at    | RBMS3          | -2,551294263 | -2,335104118 | -0,21619014 |  |
| 240303_at    | TMC5           | -2,551294263 | -2,335104118 | -0,21619014 |  |
| 241040_at    | -              | -2,551294263 | -2,335104118 | -0,21619014 |  |
| 241124_at    | -              | -2,551294263 | -2,335104118 | -0,21619014 |  |
| 244380_at    | -              | -2,551294263 | -2,335104118 | -0,21619014 |  |
| 244705_at    | -              | -2,551294263 | -2,335104118 | -0,21619014 |  |
| 1561915_at   | -              | -1,639579028 | -1,423348341 | -0,21623069 |  |
| 1566630_at   | PPP2R3B        | -1,639579028 | -1,423348341 | -0,21623069 |  |
| 1570044_at   | -              | -1,639579028 | -1,423348341 | -0,21623069 |  |
| 207317_s_at  | CASQ2          | -1,639579028 | -1,423348341 | -0,21623069 |  |
| 219533_at    | CDKN1C         | -1,639579028 | -1,423348341 | -0,21623069 |  |
| 222135_at    | ZNF814         | -1,639579028 | -1,423348341 | -0,21623069 |  |
| 227775_at    | CELF6          | -1,639579028 | -1,423348341 | -0,21623069 |  |
| 230882_at    | DLX6-AS1       | -1,639579028 | -1,423348341 | -0,21623069 |  |
| 233900_at    | -              | -1,639579028 | -1,423348341 | -0,21623069 |  |
| 236101_at    | -              | -1,639579028 | -1,423348341 | -0,21623069 |  |
| 236188_s_at  | NAP1L4         | -1,639579028 | -1,423348341 | -0,21623069 |  |
| 236866_at    | GALNS          | -1,639579028 | -1,423348341 | -0,21623069 |  |
| 240889_at    | CDRT15L2       | -1,639579028 | -1,423348341 | -0,21623069 |  |
| 240993_at    | -              | -1,639579028 | -1,423348341 | -0,21623069 |  |
| 242988_at    | DCST2          | -1,639579028 | -1,423348341 | -0,21623069 |  |
| 238761_at    | ELK4           | 1,233777334  | 1,450051551  | -0,21627422 |  |
| 1557761_s_at | LOC400794      | -0,352951799 | -0,136643983 | -0,21630782 |  |
| 203084_at    | TGFB1          | -0,352951799 | -0,136643983 | -0,21630782 |  |
| 212772_s_at  | ABCA2          | -0,352951799 | -0,136643983 | -0,21630782 |  |
| 213369_at    | CDHR1          | -0,352951799 | -0,136643983 | -0,21630782 |  |
| 219411_at    | ELMO3          | -0,352951799 | -0,136643983 | -0,21630782 |  |
| 229015_at    | LOC286367      | -0,352951799 | -0,136643983 | -0,21630782 |  |

|              |              |              |              |             |  |
|--------------|--------------|--------------|--------------|-------------|--|
| 232403_at    | SPG11        | -0,352951799 | -0,136643983 | -0,21630782 |  |
| 235913_at    | ZNF880       | -0,352951799 | -0,136643983 | -0,21630782 |  |
| 240644_at    | -            | -0,352951799 | -0,136643983 | -0,21630782 |  |
| 242508_at    | KIAA2018     | -0,352951799 | -0,136643983 | -0,21630782 |  |
| 244334_at    | TRAM1L1      | -0,352951799 | -0,136643983 | -0,21630782 |  |
| 220251_at    | DIEXF        | 0,648296226  | 0,864649967  | -0,21635374 |  |
| 227984_at    | LMF1         | 0,648296226  | 0,864649967  | -0,21635374 |  |
| 230174_at    | LYPLAL1      | 0,648296226  | 0,864649967  | -0,21635374 |  |
| 217980_s_at  | MRPL16       | 4,114129991  | 4,330558009  | -0,21642802 |  |
| 213865_at    | DCBLD2       | 1,549482847  | 1,765933685  | -0,21645084 |  |
| 203406_at    | MFAP1        | 4,671066265  | 4,88753743   | -0,21647117 |  |
| 218751_s_at  | FBXW7        | 0,984222186  | 1,200746069  | -0,21652388 |  |
| 227264_at    | TRAF6        | 0,984222186  | 1,200746069  | -0,21652388 |  |
| 227448_at    | ARGLU1       | 0,984222186  | 1,200746069  | -0,21652388 |  |
| 225465_at    | MAGI1        | 1,937784532  | 2,154405725  | -0,21662119 |  |
| 227220_at    | NFXL1        | 1,485482016  | 1,702196344  | -0,21671433 |  |
| 214545_s_at  | PROSC        | 2,683419202  | 2,900133867  | -0,21671467 |  |
| 202794_at    | INPP1        | 4,349114236  | 4,565857693  | -0,21674346 |  |
| 222659_at    | IPO11        | 3,146001821  | 3,362748434  | -0,21674661 |  |
| 1569679_at   | CDH22        | 0,351548291  | 0,568365095  | -0,2168168  |  |
| 213573_at    | -            | 3,436222554  | 3,653046807  | -0,21682425 |  |
| 1559591_s_at | CHDH         | 0,44160593   | 0,658444279  | -0,21683835 |  |
| 223799_at    | MSANTD4      | 0,44160593   | 0,658444279  | -0,21683835 |  |
| 227632_at    | TBC1D24      | 0,44160593   | 0,658444279  | -0,21683835 |  |
| 1255_g_at    | GUCA1A       | -2,667025278 | -2,450130945 | -0,21689433 |  |
| 221863_at    | MIER2        | 0,888485433  | 1,105412836  | -0,2169274  |  |
| 214150_x_at  | ATP6V0E1     | 5,054797981  | 5,271732429  | -0,21693445 |  |
| 202386_s_at  | KIAA0430     | 2,546213279  | 2,763166224  | -0,21695295 |  |
| 206001_at    | NPY          | 1,326951551  | 1,543943227  | -0,21699168 |  |
| 216925_s_at  | TAL1         | 1,373456798  | 1,590454215  | -0,21699742 |  |
| 210443_x_at  | OGFR         | 1,699726954  | 1,916759838  | -0,21703288 |  |
| 226104_at    | RNF170       | 1,699726954  | 1,916759838  | -0,21703288 |  |
| 242438_at    | ASXL1        | 1,965648824  | 2,182705233  | -0,21705641 |  |
| 203569_s_at  | OFD1         | 4,409704166  | 4,626777417  | -0,21707325 |  |
| 206594_at    | PASK         | -0,43775896  | -0,220592223 | -0,21716674 |  |
| 229301_at    | -            | -0,43775896  | -0,220592223 | -0,21716674 |  |
| 232690_at    | -            | -0,43775896  | -0,220592223 | -0,21716674 |  |
| 235630_at    | -            | -0,43775896  | -0,220592223 | -0,21716674 |  |
| 238334_at    | MTG1         | -0,43775896  | -0,220592223 | -0,21716674 |  |
| 242052_at    | -            | -0,43775896  | -0,220592223 | -0,21716674 |  |
| 242462_at    | LOC100506930 | -0,43775896  | -0,220592223 | -0,21716674 |  |
| 202640_s_at  | RANBP3       | 1,603688695  | 1,820984782  | -0,21729609 |  |
| 235093_at    | PEX13        | 1,603688695  | 1,820984782  | -0,21729609 |  |
| 205570_at    | PIP4K2A      | 1,251994932  | 1,469325098  | -0,21733017 |  |
| 204279_at    | PSMB9        | 1,201332287  | 1,418668082  | -0,2173358  |  |
| 63825_at     | ABHD2        | 3,827977063  | 4,045409633  | -0,21743257 |  |
| 209110_s_at  | RGL2         | 2,134723057  | 2,352169913  | -0,21744686 |  |
| 224718_at    | YY1          | 3,641042878  | 3,858511405  | -0,21746853 |  |
| 226599_at    | FHDC1        | 0,20027154   | 0,417770464  | -0,21749892 |  |
| 217893_s_at  | AKIRIN1      | 3,043834719  | 3,261354437  | -0,21751972 |  |
| 218299_at    | C11orf24     | 1,767779954  | 1,98530622   | -0,21752627 |  |
| 219961_s_at  | PLK1S1       | 1,732533761  | 1,950068772  | -0,21753501 |  |
| 203849_s_at  | KIF1A        | -0,83191556  | -0,614371577 | -0,21754398 |  |
| 219866_at    | CLIC5        | -0,83191556  | -0,614371577 | -0,21754398 |  |
| 223881_at    | ICA1L        | -0,83191556  | -0,614371577 | -0,21754398 |  |
| 233454_at    | POLN         | -0,83191556  | -0,614371577 | -0,21754398 |  |

|              |                  |              |              |             |  |
|--------------|------------------|--------------|--------------|-------------|--|
| 212840_at    | UBXN7            | 1,414471577  | 1,632095957  | -0,21762438 |  |
| 201824_at    | RNF14            | 2,713311265  | 2,93104672   | -0,21773545 |  |
| 209481_at    | SNRK             | 2,983784569  | 3,201528602  | -0,21774403 |  |
| 223907_s_at  | PINX1            | 2,261526912  | 2,479296438  | -0,21776953 |  |
| 209106_at    | NCOA1            | 1,897847661  | 2,115788273  | -0,21794061 |  |
| 1552373_s_at | C4orf33          | -2,908843709 | -2,690860744 | -0,21798296 |  |
| 1553944_at   | CTAGE5 /// MIA2  | -2,908843709 | -2,690860744 | -0,21798296 |  |
| 1560772_a_at | -                | -2,908843709 | -2,690860744 | -0,21798296 |  |
| 1562909_at   | C1orf98          | -2,908843709 | -2,690860744 | -0,21798296 |  |
| 1564357_at   | ABHD12B /// MIR  | -2,908843709 | -2,690860744 | -0,21798296 |  |
| 1564699_at   | -                | -2,908843709 | -2,690860744 | -0,21798296 |  |
| 1565565_at   | -                | -2,908843709 | -2,690860744 | -0,21798296 |  |
| 207326_at    | BTC              | -2,908843709 | -2,690860744 | -0,21798296 |  |
| 214146_s_at  | PPBP             | -2,908843709 | -2,690860744 | -0,21798296 |  |
| 215332_s_at  | CD8B             | -2,908843709 | -2,690860744 | -0,21798296 |  |
| 216155_at    | -                | -2,908843709 | -2,690860744 | -0,21798296 |  |
| 216639_at    | SRPX2            | -2,908843709 | -2,690860744 | -0,21798296 |  |
| 217136_at    | PPIAL4A /// PPIA | -2,908843709 | -2,690860744 | -0,21798296 |  |
| 236489_at    | GPR110           | -2,908843709 | -2,690860744 | -0,21798296 |  |
| 236955_at    | -                | -2,908843709 | -2,690860744 | -0,21798296 |  |
| 237579_at    | -                | -2,908843709 | -2,690860744 | -0,21798296 |  |
| 239697_x_at  | C3orf67          | -2,908843709 | -2,690860744 | -0,21798296 |  |
| 239905_at    | YTHDC1           | -2,908843709 | -2,690860744 | -0,21798296 |  |
| 240118_at    | -                | -2,908843709 | -2,690860744 | -0,21798296 |  |
| 241698_at    | RFTN2            | -2,908843709 | -2,690860744 | -0,21798296 |  |
| 241855_s_at  | -                | -2,908843709 | -2,690860744 | -0,21798296 |  |
| 242718_at    | -                | -2,908843709 | -2,690860744 | -0,21798296 |  |
| 244116_at    | -                | -2,908843709 | -2,690860744 | -0,21798296 |  |
| 218843_at    | FNDC4            | 0,518867317  | 0,73688026   | -0,21801294 |  |
| 239696_at    | -                | 0,518867317  | 0,73688026   | -0,21801294 |  |
| 1553450_s_at | LINC00304        | -2,504600601 | -2,286583451 | -0,21801715 |  |
| 1559228_at   | CLU              | -2,504600601 | -2,286583451 | -0,21801715 |  |
| 1560453_at   | -                | -2,504600601 | -2,286583451 | -0,21801715 |  |
| 1561596_at   | -                | -2,504600601 | -2,286583451 | -0,21801715 |  |
| 1562871_at   | -                | -2,504600601 | -2,286583451 | -0,21801715 |  |
| 1564881_at   | LOC152578        | -2,504600601 | -2,286583451 | -0,21801715 |  |
| 1568765_at   | SERPINE1         | -2,504600601 | -2,286583451 | -0,21801715 |  |
| 214514_at    | MCM3AP           | -2,504600601 | -2,286583451 | -0,21801715 |  |
| 215331_at    | MYH15            | -2,504600601 | -2,286583451 | -0,21801715 |  |
| 216127_at    | PDIA2            | -2,504600601 | -2,286583451 | -0,21801715 |  |
| 219243_at    | GIMAP4           | -2,504600601 | -2,286583451 | -0,21801715 |  |
| 229935_s_at  | MLL              | -2,504600601 | -2,286583451 | -0,21801715 |  |
| 230493_at    | SHISA2           | -2,504600601 | -2,286583451 | -0,21801715 |  |
| 233028_at    | MCMBP            | -2,504600601 | -2,286583451 | -0,21801715 |  |
| 233508_at    | MAP3K13          | -2,504600601 | -2,286583451 | -0,21801715 |  |
| 234190_at    | -                | -2,504600601 | -2,286583451 | -0,21801715 |  |
| 236272_at    | UNC119B          | -2,504600601 | -2,286583451 | -0,21801715 |  |
| 237170_at    | LOC100507384     | -2,504600601 | -2,286583451 | -0,21801715 |  |
| 237753_at    | IL21R            | -2,504600601 | -2,286583451 | -0,21801715 |  |
| 237908_at    | -                | -2,504600601 | -2,286583451 | -0,21801715 |  |
| 241129_at    | -                | -2,504600601 | -2,286583451 | -0,21801715 |  |
| 241850_at    | -                | -2,504600601 | -2,286583451 | -0,21801715 |  |
| 241953_at    | FLJ25694 /// KRT | -2,504600601 | -2,286583451 | -0,21801715 |  |
| 243701_at    | -                | -2,504600601 | -2,286583451 | -0,21801715 |  |
| 244873_s_at  | -                | -2,504600601 | -2,286583451 | -0,21801715 |  |
| 1554365_a_at | PPP2R5C          | 3,920575295  | 4,138648509  | -0,21807321 |  |

|              |                |              |              |             |  |
|--------------|----------------|--------------|--------------|-------------|--|
| 207827_x_at  | SNCA           | 2,943717636  | 3,161800893  | -0,21808326 |  |
| 204292_x_at  | STK11          | 0,97328325   | 1,191491281  | -0,21820803 |  |
| 201050_at    | PLD3           | 2,919702154  | 3,137910193  | -0,21820804 |  |
| 219885_at    | SLFN12         | 0,03125738   | 0,249604176  | -0,2183468  |  |
| 234008_s_at  | CES3           | 0,03125738   | 0,249604176  | -0,2183468  |  |
| 243807_at    | NCOA7          | 0,03125738   | 0,249604176  | -0,2183468  |  |
| 64488_at     | IRGQ           | 1,910805473  | 2,129179938  | -0,21837447 |  |
| 1557155_a_at | -              | -0,089689931 | 0,128747141  | -0,21843707 |  |
| 201124_at    | ITGB5          | -0,089689931 | 0,128747141  | -0,21843707 |  |
| 204811_s_at  | CACNA2D2       | -0,089689931 | 0,128747141  | -0,21843707 |  |
| 213533_at    | D4S234E        | -0,089689931 | 0,128747141  | -0,21843707 |  |
| 232025_at    | SYT7           | -0,089689931 | 0,128747141  | -0,21843707 |  |
| 223711_s_at  | THYN1          | 3,232262672  | 3,450709925  | -0,21844725 |  |
| 222029_x_at  | PFDN6          | 4,034147209  | 4,252607423  | -0,21846021 |  |
| 221021_s_at  | CTNBL1         | 4,20284547   | 4,42143356   | -0,21858809 |  |
| 218563_at    | NDUFA3         | 5,256060676  | 5,474674427  | -0,21861375 |  |
| 227847_at    | EPM2AIP1       | 2,661438684  | 2,880111483  | -0,2186728  |  |
| 231428_at    | -              | 0,384950573  | 0,603679647  | -0,21872907 |  |
| 1556793_a_at | FAM83C         | -1,131062212 | -0,912331589 | -0,21873062 |  |
| 1562862_at   | -              | -1,131062212 | -0,912331589 | -0,21873062 |  |
| 202997_s_at  | LOXL2          | -1,131062212 | -0,912331589 | -0,21873062 |  |
| 204688_at    | SGCE           | -1,131062212 | -0,912331589 | -0,21873062 |  |
| 206839_at    | C22orf31       | -1,131062212 | -0,912331589 | -0,21873062 |  |
| 207718_x_at  | CYP2A7         | -1,131062212 | -0,912331589 | -0,21873062 |  |
| 211772_x_at  | CHRNA3         | -1,131062212 | -0,912331589 | -0,21873062 |  |
| 213463_s_at  | FAM149B1       | -1,131062212 | -0,912331589 | -0,21873062 |  |
| 213590_at    | SLC16A5        | -1,131062212 | -0,912331589 | -0,21873062 |  |
| 213621_s_at  | GUK1           | -1,131062212 | -0,912331589 | -0,21873062 |  |
| 214248_s_at  | TRIM2          | -1,131062212 | -0,912331589 | -0,21873062 |  |
| 221466_at    | P2RY4          | -1,131062212 | -0,912331589 | -0,21873062 |  |
| 232590_at    | -              | -1,131062212 | -0,912331589 | -0,21873062 |  |
| 237366_at    | -              | -1,131062212 | -0,912331589 | -0,21873062 |  |
| 238260_at    | -              | -1,131062212 | -0,912331589 | -0,21873062 |  |
| 244209_at    | FLJ41350       | -1,131062212 | -0,912331589 | -0,21873062 |  |
| 1562290_at   | -              | -3,566473328 | -3,347710726 | -0,2187626  |  |
| 225179_at    | UBE2K          | 3,333038605  | 3,551810897  | -0,21877229 |  |
| 229958_at    | CLN8           | 0,810733188  | 1,029536893  | -0,21880371 |  |
| 235600_at    | -              | 0,810733188  | 1,029536893  | -0,21880371 |  |
| 203247_s_at  | ZNF24          | 3,217273782  | 3,436090594  | -0,21881681 |  |
| 218724_s_at  | TGIF2          | 2,084778276  | 2,303602088  | -0,21882381 |  |
| 242467_at    | -              | 1,027166904  | 1,246149888  | -0,21898298 |  |
| 204493_at    | BID            | 2,470441349  | 2,689475799  | -0,21903445 |  |
| 235648_at    | ZNF567         | 4,706176435  | 4,925363174  | -0,21918674 |  |
| 238346_s_at  | TGS1           | 3,207971844  | 3,427247355  | -0,21927551 |  |
| 205394_at    | CHEK1          | 3,397876879  | 3,617207412  | -0,21933053 |  |
| 202481_at    | DHRS3          | 2,238870125  | 2,458228496  | -0,21935837 |  |
| 210243_s_at  | B4GALT3        | 2,238870125  | 2,458228496  | -0,21935837 |  |
| 239810_at    | VASH1          | 0,995078803  | 1,214517879  | -0,21943908 |  |
| 203204_s_at  | KDM4A          | 0,702292136  | 0,921731975  | -0,21943984 |  |
| 232977_x_at  | MYH14          | 0,334552598  | 0,553993624  | -0,21944103 |  |
| 209664_x_at  | NFATC1         | -0,299034815 | -0,079522948 | -0,21951187 |  |
| 220981_x_at  | NXF2 /// NXF2B | -0,299034815 | -0,079522948 | -0,21951187 |  |
| 231437_at    | SLC35D2        | -0,299034815 | -0,079522948 | -0,21951187 |  |
| 234089_at    | -              | -0,299034815 | -0,079522948 | -0,21951187 |  |
| 228801_at    | ORMDL1         | 0,934330293  | 1,153866761  | -0,21953647 |  |
| 1558088_a_at | UBE2I          | -1,71423189  | -1,494668682 | -0,21956321 |  |

|              |                 |              |              |             |  |
|--------------|-----------------|--------------|--------------|-------------|--|
| 1560913_at   | -               | -1,71423189  | -1,494668682 | -0,21956321 |  |
| 214584_x_at  | ACACB           | -1,71423189  | -1,494668682 | -0,21956321 |  |
| 216252_x_at  | FAS             | -1,71423189  | -1,494668682 | -0,21956321 |  |
| 220204_s_at  | BMP8A           | -1,71423189  | -1,494668682 | -0,21956321 |  |
| 220322_at    | IL36G           | -1,71423189  | -1,494668682 | -0,21956321 |  |
| 222944_s_at  | MAGIX           | -1,71423189  | -1,494668682 | -0,21956321 |  |
| 232519_at    | NSFL1C          | -1,71423189  | -1,494668682 | -0,21956321 |  |
| 237680_at    | -               | -1,71423189  | -1,494668682 | -0,21956321 |  |
| 238363_at    | -               | -1,71423189  | -1,494668682 | -0,21956321 |  |
| 243839_s_at  | -               | -1,71423189  | -1,494668682 | -0,21956321 |  |
| 229876_at    | PHKA1           | 0,87091093   | 1,090553537  | -0,21964261 |  |
| 203662_s_at  | TMOD1           | 1,261018186  | 1,480766833  | -0,21974865 |  |
| 1554660_a_at | CNST            | 0,133056859  | 0,352836757  | -0,21977799 |  |
| 215485_s_at  | ICAM1           | 0,133056859  | 0,352836757  | -0,21977799 |  |
| 220937_s_at  | ST6GALNAC4      | 0,133056859  | 0,352836757  | -0,21977799 |  |
| 234902_s_at  | ZNF416          | 0,133056859  | 0,352836757  | -0,21977799 |  |
| 218217_at    | SCPEP1          | 1,422536444  | 1,642321262  | -0,21978482 |  |
| 225557_at    | CSRNP1          | 1,422536444  | 1,642321262  | -0,21978482 |  |
| 241371_at    | TNFRSF10A       | 1,422536444  | 1,642321262  | -0,21978482 |  |
| 209068_at    | HNRPDL          | 2,861566439  | 3,081412119  | -0,21984568 |  |
| 205159_at    | CSF2RB          | 2,652894659  | 2,87289275   | -0,21999809 |  |
| 212621_at    | TMEM194A        | 3,049053496  | 3,269073685  | -0,22002019 |  |
| 204785_x_at  | IFNAR2          | 3,177319542  | 3,39737216   | -0,22005262 |  |
| 220942_x_at  | FAM162A         | 5,792765449  | 6,012888334  | -0,22012289 |  |
| 1561360_at   | -               | -0,543051993 | -0,322870281 | -0,22018171 |  |
| 207858_s_at  | PKLR            | -0,543051993 | -0,322870281 | -0,22018171 |  |
| 210469_at    | DLG5            | -0,543051993 | -0,322870281 | -0,22018171 |  |
| 214517_at    | KRTAP5-9        | -0,543051993 | -0,322870281 | -0,22018171 |  |
| 222083_at    | GLYAT           | -0,543051993 | -0,322870281 | -0,22018171 |  |
| 233801_s_at  | SEMA6D          | -0,543051993 | -0,322870281 | -0,22018171 |  |
| 243153_at    | CDK5RAP2        | -0,543051993 | -0,322870281 | -0,22018171 |  |
| 226707_at    | NAPRT1          | 1,352503698  | 1,572742379  | -0,22023868 |  |
| 239413_at    | CEP152          | 3,402980973  | 3,623242814  | -0,22026184 |  |
| 228348_at    | LINS            | 0,767063567  | 0,987376598  | -0,22031303 |  |
| 1555742_at   | ERVH-6          | 1,305306849  | 1,525647381  | -0,22034053 |  |
| 1559924_at   | -               | 0,503742507  | 0,724100169  | -0,22035766 |  |
| 214940_s_at  | SMG6            | 0,503742507  | 0,724100169  | -0,22035766 |  |
| 215119_at    | MYO16           | 0,503742507  | 0,724100169  | -0,22035766 |  |
| 221565_s_at  | CALHM2          | 0,503742507  | 0,724100169  | -0,22035766 |  |
| 201247_at    | SREBF2          | 1,129248302  | 1,349621332  | -0,22037303 |  |
| 203371_s_at  | NDUFB3          | 4,677820124  | 4,898243211  | -0,22042309 |  |
| 218551_at    | MIIP            | 1,659347917  | 1,879785595  | -0,22043768 |  |
| 202226_s_at  | CRK             | 3,032022986  | 3,252481567  | -0,22045858 |  |
| 202165_at    | PPP1R2          | 1,073999308  | 1,294497133  | -0,22049782 |  |
| 242431_at    | -               | 1,073999308  | 1,294497133  | -0,22049782 |  |
| 226246_at    | KCTD1           | 0,417596971  | 0,638150376  | -0,22055341 |  |
| 232882_at    | -               | 0,417596971  | 0,638150376  | -0,22055341 |  |
| 208625_s_at  | EIF4G1          | 4,186954483  | 4,407512498  | -0,22055801 |  |
| 210868_s_at  | ELOVL6          | 2,864529541  | 3,08516499   | -0,22063545 |  |
| 209070_s_at  | RGS5            | 0,072842263  | 0,293518836  | -0,22067657 |  |
| 203345_s_at  | MTF2            | 3,843828743  | 4,064545714  | -0,22071697 |  |
| 212360_at    | AMPD2           | 1,638726528  | 1,859476797  | -0,22075027 |  |
| 213624_at    | SMPDL3A         | 1,638726528  | 1,859476797  | -0,22075027 |  |
| 226348_at    | -               | 1,394109935  | 1,614891062  | -0,22078113 |  |
| 1552412_a_at | DEFB106A /// DE | -2,43257096  | -2,211750327 | -0,22082063 |  |
| 1555666_at   | PTPRS           | -2,43257096  | -2,211750327 | -0,22082063 |  |

|              |                 |              |              |             |  |
|--------------|-----------------|--------------|--------------|-------------|--|
| 1556159_at   | -               | -2,43257096  | -2,211750327 | -0,22082063 |  |
| 1556502_at   | LOC100507654    | -2,43257096  | -2,211750327 | -0,22082063 |  |
| 1558170_at   | -               | -2,43257096  | -2,211750327 | -0,22082063 |  |
| 1558628_at   | LOC100506070    | -2,43257096  | -2,211750327 | -0,22082063 |  |
| 1559377_at   | -               | -2,43257096  | -2,211750327 | -0,22082063 |  |
| 1559441_s_at | FLJ38576        | -2,43257096  | -2,211750327 | -0,22082063 |  |
| 1560102_at   | -               | -2,43257096  | -2,211750327 | -0,22082063 |  |
| 1560934_at   | LOC284669       | -2,43257096  | -2,211750327 | -0,22082063 |  |
| 1562278_at   | DNAH1           | -2,43257096  | -2,211750327 | -0,22082063 |  |
| 1563528_at   | RAPGEF4-AS1     | -2,43257096  | -2,211750327 | -0,22082063 |  |
| 204734_at    | KRT15           | -2,43257096  | -2,211750327 | -0,22082063 |  |
| 206941_x_at  | SEMA3E          | -2,43257096  | -2,211750327 | -0,22082063 |  |
| 207476_at    | LOC100507630    | -2,43257096  | -2,211750327 | -0,22082063 |  |
| 208271_at    | PAPOLB          | -2,43257096  | -2,211750327 | -0,22082063 |  |
| 210548_at    | CCL23           | -2,43257096  | -2,211750327 | -0,22082063 |  |
| 217319_x_at  | CYP4A22         | -2,43257096  | -2,211750327 | -0,22082063 |  |
| 219989_s_at  | ANKS1B          | -2,43257096  | -2,211750327 | -0,22082063 |  |
| 220930_s_at  | C13orf44        | -2,43257096  | -2,211750327 | -0,22082063 |  |
| 223891_at    | KCNQ5           | -2,43257096  | -2,211750327 | -0,22082063 |  |
| 233718_at    | LOC728543       | -2,43257096  | -2,211750327 | -0,22082063 |  |
| 234161_at    | -               | -2,43257096  | -2,211750327 | -0,22082063 |  |
| 240417_at    | -               | -2,43257096  | -2,211750327 | -0,22082063 |  |
| 1564421_at   | LOC100507435    | -0,986356909 | -0,765504029 | -0,22085288 |  |
| 203886_s_at  | FBLN2           | -0,986356909 | -0,765504029 | -0,22085288 |  |
| 207432_at    | BEST2           | -0,986356909 | -0,765504029 | -0,22085288 |  |
| 213174_at    | TTC9            | -0,986356909 | -0,765504029 | -0,22085288 |  |
| 217265_at    | -               | -0,986356909 | -0,765504029 | -0,22085288 |  |
| 224061_at    | INMT            | -0,986356909 | -0,765504029 | -0,22085288 |  |
| 240347_at    | -               | -0,986356909 | -0,765504029 | -0,22085288 |  |
| 221867_at    | N4BP1           | 0,779676066  | 1,000684521  | -0,22100846 |  |
| 227554_at    | MAGI2-AS3       | 0,779676066  | 1,000684521  | -0,22100846 |  |
| 230350_at    | -               | 2,549899391  | 2,770953871  | -0,22105448 |  |
| 208772_at    | ANKHD1 /// ANK  | 3,659926886  | 3,880994209  | -0,22106732 |  |
| 209200_at    | MEF2C           | 2,646022818  | 2,867091644  | -0,22106883 |  |
| 203322_at    | ADNP2           | 2,718233611  | 2,939363796  | -0,22113018 |  |
| 212501_at    | CEBPB           | 3,722507547  | 3,943660335  | -0,22115279 |  |
| 227016_at    | ERICH1          | 1,672933557  | 1,894118818  | -0,22118526 |  |
| 221492_s_at  | ATG3            | 4,034147209  | 4,25538582   | -0,22123861 |  |
| 228980_at    | RAD51L3-RFFL    | 2,109966786  | 2,331254065  | -0,22128728 |  |
| 230361_at    | HEATR7A /// LOC | 1,81142822   | 2,032717854  | -0,22128963 |  |
| 1552453_a_at | WDR88           | -1,763254337 | -1,541908042 | -0,2213463  |  |
| 1554372_at   | -               | -1,763254337 | -1,541908042 | -0,2213463  |  |
| 1560391_at   | -               | -1,763254337 | -1,541908042 | -0,2213463  |  |
| 1563662_at   | LOC285778       | -1,763254337 | -1,541908042 | -0,2213463  |  |
| 1565598_at   | -               | -1,763254337 | -1,541908042 | -0,2213463  |  |
| 203930_s_at  | MAPT            | -1,763254337 | -1,541908042 | -0,2213463  |  |
| 205444_at    | ATP2A1          | -1,763254337 | -1,541908042 | -0,2213463  |  |
| 207381_at    | ALOX12B         | -1,763254337 | -1,541908042 | -0,2213463  |  |
| 209985_s_at  | ASCL1           | -1,763254337 | -1,541908042 | -0,2213463  |  |
| 213721_at    | SOX2            | -1,763254337 | -1,541908042 | -0,2213463  |  |
| 214344_at    | FP588           | -1,763254337 | -1,541908042 | -0,2213463  |  |
| 215642_at    | -               | -1,763254337 | -1,541908042 | -0,2213463  |  |
| 220118_at    | ZBTB32          | -1,763254337 | -1,541908042 | -0,2213463  |  |
| 220563_s_at  | SHANK1          | -1,763254337 | -1,541908042 | -0,2213463  |  |
| 221719_s_at  | LZTS1           | -1,763254337 | -1,541908042 | -0,2213463  |  |
| 228432_at    | RAB3IP          | -1,763254337 | -1,541908042 | -0,2213463  |  |



|              |                 |              |              |             |  |
|--------------|-----------------|--------------|--------------|-------------|--|
| 230340_s_at  | WASL            | -1,763254337 | -1,541908042 | -0,2213463  |  |
| 234625_at    | -               | -1,763254337 | -1,541908042 | -0,2213463  |  |
| 236008_at    | LOC100128909    | -1,763254337 | -1,541908042 | -0,2213463  |  |
| 237657_at    | -               | -1,763254337 | -1,541908042 | -0,2213463  |  |
| 237785_at    | ASB14           | -1,763254337 | -1,541908042 | -0,2213463  |  |
| 240006_at    | -               | -1,763254337 | -1,541908042 | -0,2213463  |  |
| 241012_at    | -               | -1,763254337 | -1,541908042 | -0,2213463  |  |
| 242330_at    | -               | -1,763254337 | -1,541908042 | -0,2213463  |  |
| 242384_at    | -               | -1,763254337 | -1,541908042 | -0,2213463  |  |
| 242396_at    | LOC644192       | -1,763254337 | -1,541908042 | -0,2213463  |  |
| 242575_at    | -               | -1,763254337 | -1,541908042 | -0,2213463  |  |
| 244269_at    | -               | -1,763254337 | -1,541908042 | -0,2213463  |  |
| 204473_s_at  | ZNF592          | 0,859074518  | 1,080561626  | -0,22148711 |  |
| 228155_at    | FAM213A         | 4,291933439  | 4,51343626   | -0,22150282 |  |
| 223476_s_at  | C12orf65        | 1,454352496  | 1,675891488  | -0,22153899 |  |
| 205743_at    | STAC            | 0,273439642  | 0,495031851  | -0,22159221 |  |
| 232198_at    | -               | 0,273439642  | 0,495031851  | -0,22159221 |  |
| 225309_at    | PHF5A           | 4,760076998  | 4,981815533  | -0,22173854 |  |
| 211458_s_at  | GABARAPL1 /// C | 0,613492853  | 0,835239052  | -0,2217462  |  |
| 211599_x_at  | MET             | 0,613492853  | 0,835239052  | -0,2217462  |  |
| 235206_at    | C20orf152       | 1,037706275  | 1,259496994  | -0,22179072 |  |
| 206361_at    | PTGDR2          | 0,171847695  | 0,393761504  | -0,22191381 |  |
| 211673_s_at  | MOCS1           | 0,171847695  | 0,393761504  | -0,22191381 |  |
| 216755_at    | OSBPL10         | 0,171847695  | 0,393761504  | -0,22191381 |  |
| 237236_x_at  | LOC731789       | 0,171847695  | 0,393761504  | -0,22191381 |  |
| 212532_s_at  | LSM12           | 3,62627949   | 3,848241888  | -0,2219624  |  |
| 1558115_at   | RECK            | 0,533835206  | 0,755840599  | -0,22200539 |  |
| 209322_s_at  | SH2B1           | 0,533835206  | 0,755840599  | -0,22200539 |  |
| 211008_s_at  | UBE2I           | 0,533835206  | 0,755840599  | -0,22200539 |  |
| 203923_s_at  | CYBB            | -0,112808516 | 0,109221392  | -0,22202991 |  |
| 215364_s_at  | SZT2            | -0,112808516 | 0,109221392  | -0,22202991 |  |
| 223884_at    | OPTC            | -0,112808516 | 0,109221392  | -0,22202991 |  |
| 236772_s_at  | -               | -0,112808516 | 0,109221392  | -0,22202991 |  |
| 218281_at    | MRPL48          | 3,572931593  | 3,795004675  | -0,22207308 |  |
| 218227_at    | NUBP2           | 2,666540916  | 2,888726553  | -0,22218564 |  |
| 225613_at    | MAST4           | 2,737756747  | 2,959949103  | -0,22219236 |  |
| 1552841_s_at | BCL2L14         | -2,384869671 | -2,162639771 | -0,2222299  |  |
| 1556192_x_at | -               | -2,384869671 | -2,162639771 | -0,2222299  |  |
| 1561558_at   | LOC100506939    | -2,384869671 | -2,162639771 | -0,2222299  |  |
| 1561718_at   | -               | -2,384869671 | -2,162639771 | -0,2222299  |  |
| 1570623_at   | -               | -2,384869671 | -2,162639771 | -0,2222299  |  |
| 207008_at    | CXCR2           | -2,384869671 | -2,162639771 | -0,2222299  |  |
| 217561_at    | CALCA           | -2,384869671 | -2,162639771 | -0,2222299  |  |
| 219602_s_at  | PIEZO2          | -2,384869671 | -2,162639771 | -0,2222299  |  |
| 220970_s_at  | KRTAP2-4 /// LO | -2,384869671 | -2,162639771 | -0,2222299  |  |
| 231577_s_at  | GBP1            | -2,384869671 | -2,162639771 | -0,2222299  |  |
| 232854_at    | DIRAS1          | -2,384869671 | -2,162639771 | -0,2222299  |  |
| 233275_at    | -               | -2,384869671 | -2,162639771 | -0,2222299  |  |
| 233367_at    | -               | -2,384869671 | -2,162639771 | -0,2222299  |  |
| 233752_s_at  | ZFH3            | -2,384869671 | -2,162639771 | -0,2222299  |  |
| 234363_at    | OR6B1           | -2,384869671 | -2,162639771 | -0,2222299  |  |
| 234659_at    | -               | -2,384869671 | -2,162639771 | -0,2222299  |  |
| 236844_at    | DHX30           | -2,384869671 | -2,162639771 | -0,2222299  |  |
| 236959_s_at  | -               | -2,384869671 | -2,162639771 | -0,2222299  |  |
| 237368_at    | C3orf35         | -2,384869671 | -2,162639771 | -0,2222299  |  |
| 237459_at    | -               | -2,384869671 | -2,162639771 | -0,2222299  |  |

|              |                   |              |              |             |  |
|--------------|-------------------|--------------|--------------|-------------|--|
| 205417_s_at  | DAG1              | 3,439206878  | 3,661450356  | -0,22224348 |  |
| 218112_at    | MRPS34            | 3,464815649  | 3,687194562  | -0,22237891 |  |
| 221799_at    | CHPF2             | 1,990274687  | 2,212749286  | -0,2224746  |  |
| 214989_x_at  | -                 | 0,945567441  | 1,16809119   | -0,22252375 |  |
| 209745_at    | COQ7              | 0,682279745  | 0,904843258  | -0,22256351 |  |
| 225874_at    | FAM100A           | 0,682279745  | 0,904843258  | -0,22256351 |  |
| 212495_at    | KDM4B             | 1,314003737  | 1,536652708  | -0,22264897 |  |
| 1557081_at   | RBM25             | 3,010782559  | 3,233443554  | -0,22266099 |  |
| 204999_s_at  | ATF5              | 0,882651021  | 1,105412836  | -0,22276181 |  |
| 211962_s_at  | ZFP36L1           | 3,897615369  | 4,12047658   | -0,22286121 |  |
| 235176_at    | ZFP82             | 2,842156496  | 3,065035915  | -0,22287942 |  |
| 210762_s_at  | DLC1              | 4,11599613   | 4,338964815  | -0,22296869 |  |
| 223559_s_at  | INIP              | 3,821129803  | 4,044124824  | -0,22299502 |  |
| 31837_at     | LMF2              | 2,171078719  | 2,394122164  | -0,22304344 |  |
| 1553209_at   | RNFT2             | -1,173767127 | -0,950686014 | -0,22308111 |  |
| 1556233_s_at | KIF6              | -1,173767127 | -0,950686014 | -0,22308111 |  |
| 1570283_at   | -                 | -1,173767127 | -0,950686014 | -0,22308111 |  |
| 202855_s_at  | SLC16A3           | -1,173767127 | -0,950686014 | -0,22308111 |  |
| 206209_s_at  | CA4               | -1,173767127 | -0,950686014 | -0,22308111 |  |
| 206403_at    | ZNF536            | -1,173767127 | -0,950686014 | -0,22308111 |  |
| 207745_at    | CABP2             | -1,173767127 | -0,950686014 | -0,22308111 |  |
| 207797_s_at  | LRP2BP            | -1,173767127 | -0,950686014 | -0,22308111 |  |
| 213156_at    | -                 | -1,173767127 | -0,950686014 | -0,22308111 |  |
| 215418_at    | PARVA             | -1,173767127 | -0,950686014 | -0,22308111 |  |
| 220867_s_at  | SLC24A2           | -1,173767127 | -0,950686014 | -0,22308111 |  |
| 221318_at    | NEUROD4           | -1,173767127 | -0,950686014 | -0,22308111 |  |
| 231445_at    | PAX1              | -1,173767127 | -0,950686014 | -0,22308111 |  |
| 232643_at    | POLR2F            | -1,173767127 | -0,950686014 | -0,22308111 |  |
| 232908_at    | ATAD2B            | -1,173767127 | -0,950686014 | -0,22308111 |  |
| 233279_at    | -                 | -1,173767127 | -0,950686014 | -0,22308111 |  |
| 234594_at    | ITPK1-AS1         | -1,173767127 | -0,950686014 | -0,22308111 |  |
| 238866_at    | C19orf68          | -1,173767127 | -0,950686014 | -0,22308111 |  |
| 239328_at    | -                 | -1,173767127 | -0,950686014 | -0,22308111 |  |
| 241525_at    | LOC200772         | -1,173767127 | -0,950686014 | -0,22308111 |  |
| 208390_s_at  | GLP1R             | 0,401366113  | 0,624460759  | -0,22309465 |  |
| 1557458_s_at | SHB               | 2,05655332   | 2,27978304   | -0,22322972 |  |
| 211228_s_at  | RAD17             | 2,097427503  | 2,320681318  | -0,22325382 |  |
| 234942_s_at  | DNTTIP1           | 3,981211211  | 4,204537151  | -0,22332594 |  |
| 212184_s_at  | TAB2              | 2,790121796  | 3,013449121  | -0,22332733 |  |
| 1556718_s_at | -                 | 0,30867765   | 0,532164371  | -0,22348672 |  |
| 215614_at    | -                 | -0,759588698 | -0,536087151 | -0,22350155 |  |
| 222234_s_at  | DBNDD1            | -0,759588698 | -0,536087151 | -0,22350155 |  |
| 234919_s_at  | SNTG1             | -0,759588698 | -0,536087151 | -0,22350155 |  |
| 236560_at    | LOC100129884      | -0,759588698 | -0,536087151 | -0,22350155 |  |
| 243859_at    | -                 | -0,759588698 | -0,536087151 | -0,22350155 |  |
| 213136_at    | PTPN2             | 3,325531666  | 3,549096127  | -0,22356446 |  |
| 1569057_s_at | MIA3              | -0,325749314 | -0,102100538 | -0,22364878 |  |
| 241512_at    | SPATC1            | -0,325749314 | -0,102100538 | -0,22364878 |  |
| 202309_at    | MTHFD1            | 5,23446293   | 5,45812813   | -0,2236652  |  |
| 1553215_s_at | CCDC7             | -1,838812296 | -1,615132408 | -0,22367989 |  |
| 1555880_at   | ERVFRD-1          | -1,838812296 | -1,615132408 | -0,22367989 |  |
| 1558588_at   | LOC728855 /// LOC | -1,838812296 | -1,615132408 | -0,22367989 |  |
| 1559025_at   | 40057             | -1,838812296 | -1,615132408 | -0,22367989 |  |
| 1559362_at   | -                 | -1,838812296 | -1,615132408 | -0,22367989 |  |
| 207160_at    | IL12A             | -1,838812296 | -1,615132408 | -0,22367989 |  |
| 207285_x_at  | CSHL1             | -1,838812296 | -1,615132408 | -0,22367989 |  |

|              |                |              |              |             |  |
|--------------|----------------|--------------|--------------|-------------|--|
| 207460_at    | GZMM           | -1,838812296 | -1,615132408 | -0,22367989 |  |
| 214189_s_at  | GGA2           | -1,838812296 | -1,615132408 | -0,22367989 |  |
| 216905_s_at  | ST14           | -1,838812296 | -1,615132408 | -0,22367989 |  |
| 219301_s_at  | CNTNAP2        | -1,838812296 | -1,615132408 | -0,22367989 |  |
| 236653_at    | -              | -1,838812296 | -1,615132408 | -0,22367989 |  |
| 236808_at    | FGFR1OP2       | -1,838812296 | -1,615132408 | -0,22367989 |  |
| 236865_at    | -              | -1,838812296 | -1,615132408 | -0,22367989 |  |
| 237701_at    | C12orf54       | -1,838812296 | -1,615132408 | -0,22367989 |  |
| 240609_at    | -              | -1,838812296 | -1,615132408 | -0,22367989 |  |
| 241570_at    | -              | -1,838812296 | -1,615132408 | -0,22367989 |  |
| 241866_at    | SLC16A7        | -1,838812296 | -1,615132408 | -0,22367989 |  |
| 242128_at    | OTX2           | -1,838812296 | -1,615132408 | -0,22367989 |  |
| 242821_at    | CCDC171        | -1,838812296 | -1,615132408 | -0,22367989 |  |
| 225203_at    | PPP1R16A       | 1,69307511   | 1,916759838  | -0,22368473 |  |
| 40489_at     | ATN1           | 0,92300493   | 1,146701606  | -0,22369668 |  |
| 200830_at    | PSMD2          | 4,612785486  | 4,836499048  | -0,22371356 |  |
| 209294_x_at  | TNFRSF10B      | 1,283332461  | 1,507116528  | -0,22378407 |  |
| 200644_at    | MARCKSL1       | 5,666452598  | 5,890261779  | -0,22380918 |  |
| 235389_at    | PHF20          | 2,159061673  | 2,382985886  | -0,22392421 |  |
| 228030_at    | -              | 0,209623097  | 0,433557298  | -0,2239342  |  |
| 209525_at    | HDGFRP3        | 0,480753764  | 0,704715219  | -0,22396146 |  |
| 222160_at    | AKAP8L         | 0,480753764  | 0,704715219  | -0,22396146 |  |
| 230024_at    | AARS2          | 1,079110292  | 1,303116084  | -0,22400579 |  |
| 220459_at    | MCM3AP-AS1     | 1,373456798  | 1,59747851   | -0,22402171 |  |
| 212854_x_at  | NBPF10         | 4,723824182  | 4,947866394  | -0,22404221 |  |
| 219913_s_at  | CRNKL1         | 2,972842302  | 3,196911138  | -0,22406884 |  |
| 202373_s_at  | AURKAPS1 /// R | 3,617524043  | 3,841601244  | -0,2240772  |  |
| 200743_s_at  | TPP1           | 3,569303935  | 3,793476213  | -0,22417228 |  |
| 235071_at    | PPP3R1 /// WDR | 2,559073676  | 2,783327323  | -0,22425365 |  |
| 1557433_at   | -              | 1,021868205  | 1,246149888  | -0,22428168 |  |
| 1558537_x_at | ZNF844         | -2,311268652 | -2,086984744 | -0,22428391 |  |
| 1558624_at   | -              | -2,311268652 | -2,086984744 | -0,22428391 |  |
| 1558896_at   | IBA57          | -2,311268652 | -2,086984744 | -0,22428391 |  |
| 1559315_s_at | SOCS2-AS1      | -2,311268652 | -2,086984744 | -0,22428391 |  |
| 1559390_a_at | C1orf227       | -2,311268652 | -2,086984744 | -0,22428391 |  |
| 1561067_at   | -              | -2,311268652 | -2,086984744 | -0,22428391 |  |
| 1561889_at   | LOC100507000   | -2,311268652 | -2,086984744 | -0,22428391 |  |
| 1563018_at   | TBX5           | -2,311268652 | -2,086984744 | -0,22428391 |  |
| 1564451_at   | -              | -2,311268652 | -2,086984744 | -0,22428391 |  |
| 1569401_at   | CLEC12A        | -2,311268652 | -2,086984744 | -0,22428391 |  |
| 207086_x_at  | GAGE1 /// GAGE | -2,311268652 | -2,086984744 | -0,22428391 |  |
| 207141_s_at  | KCNJ3          | -2,311268652 | -2,086984744 | -0,22428391 |  |
| 208388_at    | NR2E3          | -2,311268652 | -2,086984744 | -0,22428391 |  |
| 209590_at    | BMP7           | -2,311268652 | -2,086984744 | -0,22428391 |  |
| 210439_at    | ICOS           | -2,311268652 | -2,086984744 | -0,22428391 |  |
| 211990_at    | HLA-DPA1       | -2,311268652 | -2,086984744 | -0,22428391 |  |
| 213371_at    | LDB3           | -2,311268652 | -2,086984744 | -0,22428391 |  |
| 216287_at    | -              | -2,311268652 | -2,086984744 | -0,22428391 |  |
| 220999_s_at  | CYFIP2         | -2,311268652 | -2,086984744 | -0,22428391 |  |
| 223883_s_at  | STK31          | -2,311268652 | -2,086984744 | -0,22428391 |  |
| 229030_at    | CAPN8          | -2,311268652 | -2,086984744 | -0,22428391 |  |
| 230859_at    | -              | -2,311268652 | -2,086984744 | -0,22428391 |  |
| 232067_at    | FAXC           | -2,311268652 | -2,086984744 | -0,22428391 |  |
| 235843_at    | -              | -2,311268652 | -2,086984744 | -0,22428391 |  |
| 235877_at    | -              | -2,311268652 | -2,086984744 | -0,22428391 |  |
| 236839_at    | -              | -2,311268652 | -2,086984744 | -0,22428391 |  |

|              |                     |              |              |             |  |
|--------------|---------------------|--------------|--------------|-------------|--|
| 238897_at    | LRRC28              | -2,311268652 | -2,086984744 | -0,22428391 |  |
| 239506_s_at  | LINC00608           | -2,311268652 | -2,086984744 | -0,22428391 |  |
| 239674_at    | -                   | -2,311268652 | -2,086984744 | -0,22428391 |  |
| 242868_at    | -                   | -2,311268652 | -2,086984744 | -0,22428391 |  |
| 243177_at    | -                   | -2,311268652 | -2,086984744 | -0,22428391 |  |
| 244393_x_at  | -                   | -2,311268652 | -2,086984744 | -0,22428391 |  |
| 231576_at    | -                   | 0,841135803  | 1,065442793  | -0,22430699 |  |
| 219650_at    | ERCC6L              | 2,840652551  | 3,065035915  | -0,22438336 |  |
| 1569107_s_at | ZNF642              | 0,255492549  | 0,479907041  | -0,22441449 |  |
| 244648_at    | -                   | 0,255492549  | 0,479907041  | -0,22441449 |  |
| 212442_s_at  | CERS6               | 3,548266005  | 3,7726819    | -0,2244159  |  |
| 212518_at    | PIP5K1C             | 1,348276312  | 1,572742379  | -0,22446607 |  |
| 221819_at    | RAB35               | 2,566371329  | 2,791007185  | -0,22463586 |  |
| 1554536_at   | DPYD                | -3,114791413 | -2,89013181  | -0,2246596  |  |
| 1555318_at   | HIF3A               | -3,114791413 | -2,89013181  | -0,2246596  |  |
| 1560395_at   | -                   | -3,114791413 | -2,89013181  | -0,2246596  |  |
| 1561121_at   | -                   | -3,114791413 | -2,89013181  | -0,2246596  |  |
| 1566846_at   | -                   | -3,114791413 | -2,89013181  | -0,2246596  |  |
| 1570391_at   | -                   | -3,114791413 | -2,89013181  | -0,2246596  |  |
| 223966_at    | UBE2D3              | -3,114791413 | -2,89013181  | -0,2246596  |  |
| 227834_at    | TXLNB               | -3,114791413 | -2,89013181  | -0,2246596  |  |
| 239822_at    | LOC100506795        | -3,114791413 | -2,89013181  | -0,2246596  |  |
| 240548_at    | -                   | -3,114791413 | -2,89013181  | -0,2246596  |  |
| 244096_at    | -                   | -3,114791413 | -2,89013181  | -0,2246596  |  |
| 226784_at    | TWISTNB             | 3,18563636   | 3,410394103  | -0,22475774 |  |
| 205926_at    | IL27RA              | 2,931053371  | 3,155865206  | -0,22481183 |  |
| 1555445_at   | CA8                 | -1,888254346 | -1,663414495 | -0,22483985 |  |
| 1556661_at   | CN5H6.4             | -1,888254346 | -1,663414495 | -0,22483985 |  |
| 1559827_at   | LOC401074           | -1,888254346 | -1,663414495 | -0,22483985 |  |
| 1561050_a_at | -                   | -1,888254346 | -1,663414495 | -0,22483985 |  |
| 1561451_a_at | ADAM29              | -1,888254346 | -1,663414495 | -0,22483985 |  |
| 1567256_at   | OR1J2               | -1,888254346 | -1,663414495 | -0,22483985 |  |
| 209767_s_at  | GP1BB /// SEPT5     | -1,888254346 | -1,663414495 | -0,22483985 |  |
| 230010_at    | SRRM4               | -1,888254346 | -1,663414495 | -0,22483985 |  |
| 231663_s_at  | ARG1                | -1,888254346 | -1,663414495 | -0,22483985 |  |
| 235720_at    | CRIP3               | -1,888254346 | -1,663414495 | -0,22483985 |  |
| 240174_at    | -                   | -1,888254346 | -1,663414495 | -0,22483985 |  |
| 240461_at    | -                   | -1,888254346 | -1,663414495 | -0,22483985 |  |
| 240483_at    | LOC100287163 /      | -1,888254346 | -1,663414495 | -0,22483985 |  |
| 241438_at    | -                   | -1,888254346 | -1,663414495 | -0,22483985 |  |
| 244023_at    | SYK                 | -1,888254346 | -1,663414495 | -0,22483985 |  |
| 1562950_at   | -                   | -0,57445847  | -0,34958478  | -0,22487369 |  |
| 211624_s_at  | DRD2                | -0,57445847  | -0,34958478  | -0,22487369 |  |
| 223916_s_at  | BCOR                | -0,57445847  | -0,34958478  | -0,22487369 |  |
| 224032_x_at  | SPANXA1 /// SPANXA2 | -0,57445847  | -0,34958478  | -0,22487369 |  |
| 210428_s_at  | HGS                 | 2,178241192  | 2,403170156  | -0,22492896 |  |
| 235399_at    | -                   | 1,534677255  | 1,759685182  | -0,22500793 |  |
| 1561778_at   | -                   | -3,32387526  | -3,098858316 | -0,22501694 |  |
| 214774_x_at  | TOX3                | -3,32387526  | -3,098858316 | -0,22501694 |  |
| 234602_x_at  | -                   | -3,32387526  | -3,098858316 | -0,22501694 |  |
| 235337_at    | SERTAD4             | -3,32387526  | -3,098858316 | -0,22501694 |  |
| 241099_at    | -                   | -3,32387526  | -3,098858316 | -0,22501694 |  |
| 224811_at    | LPP                 | 2,151803104  | 2,376875125  | -0,22507202 |  |
| 238589_s_at  | -                   | 0,592200562  | 0,817300337  | -0,22509978 |  |
| 217269_s_at  | TMPRSS15            | -0,196756757 | 0,028364014  | -0,22512077 |  |
| 228476_at    | KIAA1407            | -0,196756757 | 0,028364014  | -0,22512077 |  |

|              |                |              |              |             |  |
|--------------|----------------|--------------|--------------|-------------|--|
| 234955_at    | -              | -0,196756757 | 0,028364014  | -0,22512077 |  |
| 219781_s_at  | ZNF771         | 0,928678725  | 1,153866761  | -0,22518804 |  |
| 1552787_at   | HELB           | -2,262747984 | -2,037551727 | -0,22519626 |  |
| 1556371_at   | OLIG3          | -2,262747984 | -2,037551727 | -0,22519626 |  |
| 1558010_s_at | SLC1A2         | -2,262747984 | -2,037551727 | -0,22519626 |  |
| 1558710_at   | -              | -2,262747984 | -2,037551727 | -0,22519626 |  |
| 1560129_at   | -              | -2,262747984 | -2,037551727 | -0,22519626 |  |
| 1560133_at   | GIGYF2         | -2,262747984 | -2,037551727 | -0,22519626 |  |
| 1570098_at   | -              | -2,262747984 | -2,037551727 | -0,22519626 |  |
| 205083_at    | AOX1           | -2,262747984 | -2,037551727 | -0,22519626 |  |
| 206543_at    | SMARCA2        | -2,262747984 | -2,037551727 | -0,22519626 |  |
| 209591_s_at  | BMP7           | -2,262747984 | -2,037551727 | -0,22519626 |  |
| 211306_s_at  | FCAR           | -2,262747984 | -2,037551727 | -0,22519626 |  |
| 215469_at    | -              | -2,262747984 | -2,037551727 | -0,22519626 |  |
| 217595_at    | GSPT1          | -2,262747984 | -2,037551727 | -0,22519626 |  |
| 220581_at    | CCDC170        | -2,262747984 | -2,037551727 | -0,22519626 |  |
| 220891_at    | TRMT44         | -2,262747984 | -2,037551727 | -0,22519626 |  |
| 231273_x_at  | FRZB           | -2,262747984 | -2,037551727 | -0,22519626 |  |
| 234437_at    | -              | -2,262747984 | -2,037551727 | -0,22519626 |  |
| 236207_at    | SSFA2          | -2,262747984 | -2,037551727 | -0,22519626 |  |
| 237133_at    | -              | -2,262747984 | -2,037551727 | -0,22519626 |  |
| 237838_at    | -              | -2,262747984 | -2,037551727 | -0,22519626 |  |
| 239694_at    | TRIM7          | -2,262747984 | -2,037551727 | -0,22519626 |  |
| 242960_at    | -              | -2,262747984 | -2,037551727 | -0,22519626 |  |
| 243905_at    | LOC387895      | -2,262747984 | -2,037551727 | -0,22519626 |  |
| 244617_at    | GPR26          | -2,262747984 | -2,037551727 | -0,22519626 |  |
| 201919_at    | SLC25A36       | 3,839317436  | 4,064545714  | -0,22522828 |  |
| 226758_at    | LUC7L2         | 3,997499421  | 4,222822694  | -0,22532327 |  |
| 208781_x_at  | SNX3           | 5,391645561  | 5,617138029  | -0,22549247 |  |
| 200811_at    | CIRBP          | 3,081249977  | 3,307062282  | -0,2258123  |  |
| 224308_s_at  | INTS2          | 2,146943689  | 2,372786857  | -0,22584317 |  |
| 234297_at    | RGS8 /// SDHAP | 1,011212064  | 1,23718272   | -0,22597066 |  |
| 227825_at    | NAIF1          | 0,695652136  | 0,921731975  | -0,22607984 |  |
| 202773_s_at  | SFSWAP         | 1,292162421  | 1,518263577  | -0,22610116 |  |
| 1552461_at   | FAM46D         | -1,964176657 | -1,738067356 | -0,2261093  |  |
| 1552755_at   | C9orf66        | -1,964176657 | -1,738067356 | -0,2261093  |  |
| 1553045_at   | WNT9A          | -1,964176657 | -1,738067356 | -0,2261093  |  |
| 1553241_at   | NKAIN3         | -1,964176657 | -1,738067356 | -0,2261093  |  |
| 1555091_at   | PPM1F          | -1,964176657 | -1,738067356 | -0,2261093  |  |
| 1568623_a_at | SLC35E4        | -1,964176657 | -1,738067356 | -0,2261093  |  |
| 1569849_at   | -              | -1,964176657 | -1,738067356 | -0,2261093  |  |
| 1570450_at   | -              | -1,964176657 | -1,738067356 | -0,2261093  |  |
| 203295_s_at  | ATP1A2         | -1,964176657 | -1,738067356 | -0,2261093  |  |
| 206470_at    | PLXNC1         | -1,964176657 | -1,738067356 | -0,2261093  |  |
| 207640_x_at  | NTN3           | -1,964176657 | -1,738067356 | -0,2261093  |  |
| 207757_at    | ZFP2           | -1,964176657 | -1,738067356 | -0,2261093  |  |
| 208213_s_at  | KCNAB1         | -1,964176657 | -1,738067356 | -0,2261093  |  |
| 216536_at    | OR7E19P        | -1,964176657 | -1,738067356 | -0,2261093  |  |
| 220871_at    | -              | -1,964176657 | -1,738067356 | -0,2261093  |  |
| 225056_at    | SIPA1L2        | -1,964176657 | -1,738067356 | -0,2261093  |  |
| 228078_at    | -              | -1,964176657 | -1,738067356 | -0,2261093  |  |
| 230567_at    | KIAA1430       | -1,964176657 | -1,738067356 | -0,2261093  |  |
| 231040_at    | -              | -1,964176657 | -1,738067356 | -0,2261093  |  |
| 231731_at    | OTX2           | -1,964176657 | -1,738067356 | -0,2261093  |  |
| 235082_at    | PCNX           | -1,964176657 | -1,738067356 | -0,2261093  |  |
| 236060_at    | -              | -1,964176657 | -1,738067356 | -0,2261093  |  |

|              |                |              |              |             |  |
|--------------|----------------|--------------|--------------|-------------|--|
| 238985_at    | -              | -1,964176657 | -1,738067356 | -0,2261093  |  |
| 239230_at    | HES5           | -1,964176657 | -1,738067356 | -0,2261093  |  |
| 239771_at    | CAND1          | -1,964176657 | -1,738067356 | -0,2261093  |  |
| 241691_at    | SCARF2         | -1,964176657 | -1,738067356 | -0,2261093  |  |
| 243857_at    | MORF4L2        | -1,964176657 | -1,738067356 | -0,2261093  |  |
| 244384_at    | -              | -1,964176657 | -1,738067356 | -0,2261093  |  |
| 242090_x_at  | -              | -3,5000184   | -3,273861381 | -0,22615702 |  |
| 225482_at    | KIF1A          | 0,291166226  | 0,51742585   | -0,22625962 |  |
| 231355_at    | CACNG8         | 0,291166226  | 0,51742585   | -0,22625962 |  |
| 239096_at    | -              | 2,35929703   | 2,585563171  | -0,22626614 |  |
| 233337_s_at  | SEZ6L2         | 1,46610492   | 1,692388143  | -0,22628322 |  |
| 1553055_a_at | SLFN5          | -2,187914861 | -1,961547147 | -0,22636771 |  |
| 1554034_a_at | FRMD4A         | -2,187914861 | -1,961547147 | -0,22636771 |  |
| 1554699_at   | L3MBTL4        | -2,187914861 | -1,961547147 | -0,22636771 |  |
| 1561353_at   | -              | -2,187914861 | -1,961547147 | -0,22636771 |  |
| 201610_at    | ICMT           | -2,187914861 | -1,961547147 | -0,22636771 |  |
| 205997_at    | ADAM28         | -2,187914861 | -1,961547147 | -0,22636771 |  |
| 208345_s_at  | POU3F1         | -2,187914861 | -1,961547147 | -0,22636771 |  |
| 211470_s_at  | SULT1C2        | -2,187914861 | -1,961547147 | -0,22636771 |  |
| 215861_at    | -              | -2,187914861 | -1,961547147 | -0,22636771 |  |
| 219788_at    | PILRA          | -2,187914861 | -1,961547147 | -0,22636771 |  |
| 220409_at    | CAMSAP1        | -2,187914861 | -1,961547147 | -0,22636771 |  |
| 223895_s_at  | EPN3           | -2,187914861 | -1,961547147 | -0,22636771 |  |
| 229406_at    | RBFOX3         | -2,187914861 | -1,961547147 | -0,22636771 |  |
| 231081_at    | C2orf73        | -2,187914861 | -1,961547147 | -0,22636771 |  |
| 231127_at    | -              | -2,187914861 | -1,961547147 | -0,22636771 |  |
| 231282_at    | -              | -2,187914861 | -1,961547147 | -0,22636771 |  |
| 235734_at    | ARFGAP2        | -2,187914861 | -1,961547147 | -0,22636771 |  |
| 235873_at    | -              | -2,187914861 | -1,961547147 | -0,22636771 |  |
| 236345_at    | TBXAS1         | -2,187914861 | -1,961547147 | -0,22636771 |  |
| 236758_at    | LOC100129407 / | -2,187914861 | -1,961547147 | -0,22636771 |  |
| 236981_at    | C17orf99       | -2,187914861 | -1,961547147 | -0,22636771 |  |
| 237546_at    | -              | -2,187914861 | -1,961547147 | -0,22636771 |  |
| 237721_s_at  | ASB4           | -2,187914861 | -1,961547147 | -0,22636771 |  |
| 240860_at    | LOC100506288   | -2,187914861 | -1,961547147 | -0,22636771 |  |
| 240986_at    | -              | -2,187914861 | -1,961547147 | -0,22636771 |  |
| 241115_at    | -              | -2,187914861 | -1,961547147 | -0,22636771 |  |
| 243532_at    | LNPEP          | -2,187914861 | -1,961547147 | -0,22636771 |  |
| 244860_at    | -              | -2,187914861 | -1,961547147 | -0,22636771 |  |
| 1554499_s_at | PPA2           | 0,46522187   | 0,691645685  | -0,22642382 |  |
| 210276_s_at  | TRIOBP         | 0,46522187   | 0,691645685  | -0,22642382 |  |
| 212365_at    | MYO1B          | 0,46522187   | 0,691645685  | -0,22642382 |  |
| 240529_at    | -              | 0,46522187   | 0,691645685  | -0,22642382 |  |
| 217806_s_at  | POLDIP2        | 3,248232277  | 3,474751011  | -0,22651873 |  |
| 207320_x_at  | STAU1          | 5,103266763  | 5,329827001  | -0,22656024 |  |
| 219068_x_at  | ATAD3A         | 2,683419202  | 2,910041809  | -0,22662261 |  |
| 1560937_at   | RSU1           | -2,01371626  | -1,787089803 | -0,22662646 |  |
| 1561434_at   | -              | -2,01371626  | -1,787089803 | -0,22662646 |  |
| 1561585_at   | RCBTB2         | -2,01371626  | -1,787089803 | -0,22662646 |  |
| 1562703_at   | LOC157381      | -2,01371626  | -1,787089803 | -0,22662646 |  |
| 1562848_at   | -              | -2,01371626  | -1,787089803 | -0,22662646 |  |
| 1566861_at   | GATM           | -2,01371626  | -1,787089803 | -0,22662646 |  |
| 1568655_a_at | -              | -2,01371626  | -1,787089803 | -0,22662646 |  |
| 1569330_at   | LOC100507266   | -2,01371626  | -1,787089803 | -0,22662646 |  |
| 205138_s_at  | UST            | -2,01371626  | -1,787089803 | -0,22662646 |  |
| 210136_at    | MBP            | -2,01371626  | -1,787089803 | -0,22662646 |  |

|              |                 |              |              |             |  |
|--------------|-----------------|--------------|--------------|-------------|--|
| 217302_at    | OR2F2           | -2,01371626  | -1,787089803 | -0,22662646 |  |
| 229085_at    | LRRC3B          | -2,01371626  | -1,787089803 | -0,22662646 |  |
| 230197_s_at  | TPPP            | -2,01371626  | -1,787089803 | -0,22662646 |  |
| 231525_at    | IQCF5           | -2,01371626  | -1,787089803 | -0,22662646 |  |
| 233107_at    | -               | -2,01371626  | -1,787089803 | -0,22662646 |  |
| 233402_at    | -               | -2,01371626  | -1,787089803 | -0,22662646 |  |
| 239244_at    | LOC100507616    | -2,01371626  | -1,787089803 | -0,22662646 |  |
| 239813_at    | IQCH            | -2,01371626  | -1,787089803 | -0,22662646 |  |
| 240475_at    | EGOT            | -2,01371626  | -1,787089803 | -0,22662646 |  |
| 241022_at    | -               | -2,01371626  | -1,787089803 | -0,22662646 |  |
| 241090_at    | -               | -2,01371626  | -1,787089803 | -0,22662646 |  |
| 242175_at    | -               | -2,01371626  | -1,787089803 | -0,22662646 |  |
| 1552498_at   | ZSCAN20         | -2,138804305 | -1,912089812 | -0,22671449 |  |
| 1559403_at   | LOC100288198    | -2,138804305 | -1,912089812 | -0,22671449 |  |
| 1559459_at   | LOC613266       | -2,138804305 | -1,912089812 | -0,22671449 |  |
| 1559589_a_at | -               | -2,138804305 | -1,912089812 | -0,22671449 |  |
| 1563287_at   | -               | -2,138804305 | -1,912089812 | -0,22671449 |  |
| 1569238_a_at | -               | -2,138804305 | -1,912089812 | -0,22671449 |  |
| 206547_s_at  | PPEF1           | -2,138804305 | -1,912089812 | -0,22671449 |  |
| 207410_s_at  | TLX2            | -2,138804305 | -1,912089812 | -0,22671449 |  |
| 211359_s_at  | OPRM1           | -2,138804305 | -1,912089812 | -0,22671449 |  |
| 214841_at    | CNIH3 /// LOC10 | -2,138804305 | -1,912089812 | -0,22671449 |  |
| 214854_at    | -               | -2,138804305 | -1,912089812 | -0,22671449 |  |
| 216895_at    | GABRG3          | -2,138804305 | -1,912089812 | -0,22671449 |  |
| 220448_at    | KCNK12          | -2,138804305 | -1,912089812 | -0,22671449 |  |
| 221698_s_at  | CLEC7A          | -2,138804305 | -1,912089812 | -0,22671449 |  |
| 227177_at    | CORO2A          | -2,138804305 | -1,912089812 | -0,22671449 |  |
| 236618_at    | C20orf132       | -2,138804305 | -1,912089812 | -0,22671449 |  |
| 237584_at    | -               | -2,138804305 | -1,912089812 | -0,22671449 |  |
| 242187_s_at  | TNRC18          | -2,138804305 | -1,912089812 | -0,22671449 |  |
| 244114_x_at  | -               | -2,138804305 | -1,912089812 | -0,22671449 |  |
| 210993_s_at  | SMAD1           | 1,191926657  | 1,418668082  | -0,22674143 |  |
| 228522_at    | FBRSL1          | 1,191926657  | 1,418668082  | -0,22674143 |  |
| 1565716_at   | FUS             | -0,022466681 | 0,204310755  | -0,22677744 |  |
| 202500_at    | DNAJB2          | -0,022466681 | 0,204310755  | -0,22677744 |  |
| 243237_at    | -               | -0,022466681 | 0,204310755  | -0,22677744 |  |
| 225925_s_at  | USP48           | 4,15705639   | 4,383838717  | -0,22678233 |  |
| 1555651_at   | OR10A5          | -2,089474779 | -1,862647763 | -0,22682702 |  |
| 1556593_s_at | -               | -2,089474779 | -1,862647763 | -0,22682702 |  |
| 1556641_at   | SLC7A14         | -2,089474779 | -1,862647763 | -0,22682702 |  |
| 1558541_at   | KIAA1456        | -2,089474779 | -1,862647763 | -0,22682702 |  |
| 1559952_x_at | FAM66C /// FAM6 | -2,089474779 | -1,862647763 | -0,22682702 |  |
| 1564401_at   | LOC400748       | -2,089474779 | -1,862647763 | -0,22682702 |  |
| 1570049_at   | LOC100130581    | -2,089474779 | -1,862647763 | -0,22682702 |  |
| 206692_at    | KCNJ10          | -2,089474779 | -1,862647763 | -0,22682702 |  |
| 207434_s_at  | FXYP2 /// FXYP6 | -2,089474779 | -1,862647763 | -0,22682702 |  |
| 210289_at    | NAT8 /// NAT8B  | -2,089474779 | -1,862647763 | -0,22682702 |  |
| 215384_s_at  | MAP1A           | -2,089474779 | -1,862647763 | -0,22682702 |  |
| 230280_at    | TRIM9           | -2,089474779 | -1,862647763 | -0,22682702 |  |
| 233695_s_at  | CECR2           | -2,089474779 | -1,862647763 | -0,22682702 |  |
| 235002_at    | NUDT16          | -2,089474779 | -1,862647763 | -0,22682702 |  |
| 235662_at    | -               | -2,089474779 | -1,862647763 | -0,22682702 |  |
| 235774_at    | LOC100422737    | -2,089474779 | -1,862647763 | -0,22682702 |  |
| 238661_at    | LOC100130155    | -2,089474779 | -1,862647763 | -0,22682702 |  |
| 240932_at    | UBN2            | -2,089474779 | -1,862647763 | -0,22682702 |  |
| 242682_at    | -               | -2,089474779 | -1,862647763 | -0,22682702 |  |

|              |                   |              |              |             |  |
|--------------|-------------------|--------------|--------------|-------------|--|
| 224922_at    | CSNK2A2           | 3,159334685  | 3,386261038  | -0,22692635 |  |
| 31826_at     | FKBP15            | 2,338135744  | 2,565105976  | -0,22697023 |  |
| 203810_at    | DNAJB4            | 0,917308734  | 1,144305291  | -0,22699656 |  |
| 203599_s_at  | WBP4              | 1,689737652  | 1,916759838  | -0,22702219 |  |
| 202096_s_at  | TSPO              | 3,943175539  | 4,170203296  | -0,22702776 |  |
| 205930_at    | GTF2E1            | 3,745192233  | 3,972313606  | -0,22712137 |  |
| 218536_at    | MRS2              | 3,183265014  | 3,410394103  | -0,22712909 |  |
| 201080_at    | PIP4K2B           | 2,201862497  | 2,428994491  | -0,22713199 |  |
| 202410_x_at  | IGF2 /// INS-IGF2 | -0,423248115 | -0,19610998  | -0,22713814 |  |
| 214444_s_at  | PVR               | -0,423248115 | -0,19610998  | -0,22713814 |  |
| 233243_at    | -                 | -0,423248115 | -0,19610998  | -0,22713814 |  |
| 238951_at    | -                 | -0,423248115 | -0,19610998  | -0,22713814 |  |
| 239663_x_at  | LARP1             | -0,423248115 | -0,19610998  | -0,22713814 |  |
| 244456_at    | -                 | -0,423248115 | -0,19610998  | -0,22713814 |  |
| 200843_s_at  | EPRS              | 4,581162518  | 4,808395708  | -0,22723319 |  |
| 201906_s_at  | CTDSPL            | 1,578645857  | 1,805902329  | -0,22725647 |  |
| 209299_x_at  | PPIL2             | 1,722769813  | 1,950068772  | -0,22729896 |  |
| 218425_at    | RNF216            | 1,163336153  | 1,390636111  | -0,22729996 |  |
| 223670_s_at  | HEMGN             | 1,261018186  | 1,488344553  | -0,22732637 |  |
| 226419_s_at  | FLJ44342          | 1,352503698  | 1,579853228  | -0,22734953 |  |
| 48612_at     | N4BP1             | 2,965960999  | 3,193438316  | -0,22747732 |  |
| 201870_at    | TOMM34            | 3,211467103  | 3,439026336  | -0,22755923 |  |
| 218300_at    | C16orf53          | 2,763383302  | 2,990953566  | -0,22757026 |  |
| 231894_at    | SARS              | 1,883312263  | 2,110887591  | -0,22757533 |  |
| 221924_at    | ZMIZ2             | -0,148196756 | 0,079428135  | -0,22762489 |  |
| 229456_s_at  | DDAH1             | -0,148196756 | 0,079428135  | -0,22762489 |  |
| 242400_at    | ZFP90             | 0,083054335  | 0,310717132  | -0,2276628  |  |
| 225865_x_at  | TH1L              | 4,167291414  | 4,394968439  | -0,22767702 |  |
| 215513_at    | HYMAI             | 1,631786706  | 1,859476797  | -0,22769009 |  |
| 211769_x_at  | SERINC3           | 3,663333942  | 3,891034012  | -0,22770007 |  |
| 209449_at    | LSM2              | 4,332624738  | 4,560475791  | -0,22785105 |  |
| 219790_s_at  | NPR3              | 1,233777334  | 1,461646549  | -0,22786922 |  |
| 213448_at    | -                 | 0,648296226  | 0,876248481  | -0,22795226 |  |
| 204984_at    | GPC4              | 1,666156729  | 1,894118818  | -0,22796209 |  |
| 1553772_at   | GK5               | -3,07502285  | -2,847001814 | -0,22802104 |  |
| 1566285_at   | -                 | -3,07502285  | -2,847001814 | -0,22802104 |  |
| 215077_at    | -                 | -3,07502285  | -2,847001814 | -0,22802104 |  |
| 215894_at    | PTGDR             | -3,07502285  | -2,847001814 | -0,22802104 |  |
| 216758_at    | -                 | -3,07502285  | -2,847001814 | -0,22802104 |  |
| 217343_at    | -                 | -3,07502285  | -2,847001814 | -0,22802104 |  |
| 227705_at    | TCEAL7            | -3,07502285  | -2,847001814 | -0,22802104 |  |
| 232411_at    | -                 | -3,07502285  | -2,847001814 | -0,22802104 |  |
| 236409_at    | -                 | -3,07502285  | -2,847001814 | -0,22802104 |  |
| 237921_at    | -                 | -3,07502285  | -2,847001814 | -0,22802104 |  |
| 244291_x_at  | -                 | -3,07502285  | -2,847001814 | -0,22802104 |  |
| 202117_at    | ARHGAP1           | 4,093441556  | 4,321571774  | -0,22813022 |  |
| 201901_s_at  | YY1               | 5,191747931  | 5,42000446   | -0,22825653 |  |
| 203702_s_at  | TTLL4             | 1,783520648  | 2,011838132  | -0,22831748 |  |
| 211356_x_at  | LEPR              | 1,716223609  | 1,944570415  | -0,22834681 |  |
| 1555330_at   | GCLC              | -1,047650486 | -0,819238336 | -0,22841215 |  |
| 1555474_at   | TTLL3             | -1,047650486 | -0,819238336 | -0,22841215 |  |
| 1559138_a_at | SPATA19           | -1,047650486 | -0,819238336 | -0,22841215 |  |
| 204743_at    | TAGLN3            | -1,047650486 | -0,819238336 | -0,22841215 |  |
| 207048_at    | SLC6A11           | -1,047650486 | -0,819238336 | -0,22841215 |  |
| 216811_at    | -                 | -1,047650486 | -0,819238336 | -0,22841215 |  |
| 228243_at    | -                 | -1,047650486 | -0,819238336 | -0,22841215 |  |



|              |                   |              |              |             |  |
|--------------|-------------------|--------------|--------------|-------------|--|
| 243418_at    | -                 | -1,047650486 | -0,819238336 | -0,22841215 |  |
| 204100_at    | THRA              | -0,79540287  | -0,566887459 | -0,22851541 |  |
| 212443_at    | NBEAL2            | -0,79540287  | -0,566887459 | -0,22851541 |  |
| 215244_at    | LOC100287576 /    | -0,79540287  | -0,566887459 | -0,22851541 |  |
| 220953_s_at  | MTMR12            | -0,79540287  | -0,566887459 | -0,22851541 |  |
| 222929_at    | FAM160B2          | -0,79540287  | -0,566887459 | -0,22851541 |  |
| 232343_at    | DCTN5             | -0,79540287  | -0,566887459 | -0,22851541 |  |
| 232631_at    | CDH6              | -0,79540287  | -0,566887459 | -0,22851541 |  |
| 240189_at    | ACOXL             | -0,79540287  | -0,566887459 | -0,22851541 |  |
| 242804_at    | POLN              | -0,79540287  | -0,566887459 | -0,22851541 |  |
| 242872_at    | CIT /// MIR1178   | -0,79540287  | -0,566887459 | -0,22851541 |  |
| 243576_at    | -                 | -0,79540287  | -0,566887459 | -0,22851541 |  |
| 208964_s_at  | FADS1 /// MIR19   | 0,995078803  | 1,223626587  | -0,22854778 |  |
| 206654_s_at  | POLR3G            | -0,512251684 | -0,283667828 | -0,22858386 |  |
| 228409_at    | PLIN4             | -0,512251684 | -0,283667828 | -0,22858386 |  |
| 232388_at    | CNTNAP4           | -0,512251684 | -0,283667828 | -0,22858386 |  |
| 234801_s_at  | ACSS1             | -0,512251684 | -0,283667828 | -0,22858386 |  |
| 238764_at    | CSAD              | -0,512251684 | -0,283667828 | -0,22858386 |  |
| 239560_at    | -                 | -0,512251684 | -0,283667828 | -0,22858386 |  |
| 240162_at    | -                 | -0,512251684 | -0,283667828 | -0,22858386 |  |
| 227672_at    | C8orf73           | 1,129248302  | 1,3579181    | -0,2286698  |  |
| 207629_s_at  | ARHGEF2           | 0,747935635  | 0,976641161  | -0,22870553 |  |
| 208474_at    | CLDN6             | 0,747935635  | 0,976641161  | -0,22870553 |  |
| 236635_at    | ZNF667            | 3,338376889  | 3,56709884   | -0,22872195 |  |
| 235042_at    | XIRP1             | 0,228146222  | 0,456918297  | -0,22877208 |  |
| 211133_x_at  | LILRA6 /// LILRB3 | 0,606430281  | 0,835239052  | -0,22880877 |  |
| 211603_s_at  | ETV4              | 0,606430281  | 0,835239052  | -0,22880877 |  |
| 212101_at    | KPNA6 /// LOC10   | 3,127619759  | 3,356551164  | -0,22893141 |  |
| 220386_s_at  | EML4              | 2,061726373  | 2,290658654  | -0,22893228 |  |
| 241715_x_at  | ACPT              | 0,020670649  | 0,249604176  | -0,22893353 |  |
| 227086_at    | C22orf39          | 1,567778694  | 1,796776588  | -0,22899789 |  |
| 226052_at    | BRD4              | 2,396622324  | 2,625627364  | -0,22900504 |  |
| 206699_x_at  | NPAS1             | -0,221656139 | 0,007421914  | -0,22907805 |  |
| 227115_at    | LOC100506870      | -0,221656139 | 0,007421914  | -0,22907805 |  |
| 226247_at    | PLEKHA1           | 1,073999308  | 1,303116084  | -0,22911678 |  |
| 160020_at    | MMP14             | 0,948363106  | 1,177496821  | -0,22913371 |  |
| 222062_at    | IL27RA            | 4,049851779  | 4,279061697  | -0,22920992 |  |
| 226624_at    | -                 | 1,69307511   | 1,922365006  | -0,2292899  |  |
| 216229_x_at  | -                 | 0,67554678   | 0,904843258  | -0,22929648 |  |
| 215812_s_at  | LOC653562 /// SI  | 2,710020346  | 2,939363796  | -0,22934345 |  |
| 212913_at    | MSH5 /// MSH5-S   | 1,446464021  | 1,675891488  | -0,22942747 |  |
| 214317_x_at  | RPS9              | 6,145634006  | 6,375074387  | -0,22944038 |  |
| 224703_at    | DCAF5             | 1,960118853  | 2,189694216  | -0,22957536 |  |
| 1557584_at   | -                 | 0,123193849  | 0,352836757  | -0,22964291 |  |
| 1561619_at   | -                 | 0,123193849  | 0,352836757  | -0,22964291 |  |
| 1562026_at   | WNK2              | 0,123193849  | 0,352836757  | -0,22964291 |  |
| 210870_s_at  | EPM2A             | 0,123193849  | 0,352836757  | -0,22964291 |  |
| 1552884_at   | NKX6-3            | 0,359971644  | 0,589657387  | -0,22968574 |  |
| 205657_at    | HAAO              | 0,359971644  | 0,589657387  | -0,22968574 |  |
| 235317_at    | LOC284454         | 0,359971644  | 0,589657387  | -0,22968574 |  |
| 228456_s_at  | CDS2              | 2,59162628   | 2,821324225  | -0,22969794 |  |
| 213201_s_at  | TNNT1             | 2,173470163  | 2,403170156  | -0,22969999 |  |
| 1562013_a_at | LOC100506730      | 1,504602299  | 1,73441697   | -0,22981467 |  |
| 209041_s_at  | UBE2G2            | 3,671816548  | 3,901713973  | -0,22989743 |  |
| 81811_at     | -                 | 1,068870153  | 1,298813045  | -0,22994289 |  |
| 1554474_a_at | MOXD1             | -1,240169874 | -1,010192375 | -0,2299775  |  |

|              |                  |              |              |             |  |
|--------------|------------------|--------------|--------------|-------------|--|
| 1554511_at   | WWC1             | -1,240169874 | -1,010192375 | -0,2299775  |  |
| 1557060_at   | -                | -1,240169874 | -1,010192375 | -0,2299775  |  |
| 1559059_s_at | ZNF611           | -1,240169874 | -1,010192375 | -0,2299775  |  |
| 1562765_at   | WWTR1-AS1        | -1,240169874 | -1,010192375 | -0,2299775  |  |
| 205721_at    | GFRA2            | -1,240169874 | -1,010192375 | -0,2299775  |  |
| 206985_at    | HSD17B3          | -1,240169874 | -1,010192375 | -0,2299775  |  |
| 210271_at    | NEUROD2          | -1,240169874 | -1,010192375 | -0,2299775  |  |
| 223747_x_at  | WWOX             | -1,240169874 | -1,010192375 | -0,2299775  |  |
| 224178_s_at  | SOX6             | -1,240169874 | -1,010192375 | -0,2299775  |  |
| 230288_at    | FGF14            | -1,240169874 | -1,010192375 | -0,2299775  |  |
| 230881_at    | CCDC42           | -1,240169874 | -1,010192375 | -0,2299775  |  |
| 237922_at    | -                | -1,240169874 | -1,010192375 | -0,2299775  |  |
| 238124_at    | MYOM3            | -1,240169874 | -1,010192375 | -0,2299775  |  |
| 239245_at    | -                | -1,240169874 | -1,010192375 | -0,2299775  |  |
| 242728_at    | -                | -1,240169874 | -1,010192375 | -0,2299775  |  |
| 242738_s_at  | ZFH3             | -1,240169874 | -1,010192375 | -0,2299775  |  |
| 244227_at    | SYT6             | -1,240169874 | -1,010192375 | -0,2299775  |  |
| 244700_at    | SEC61B           | -1,240169874 | -1,010192375 | -0,2299775  |  |
| 201271_s_at  | RALY             | 3,285189903  | 3,515187047  | -0,22999714 |  |
| 39313_at     | WNK1             | -1,470833215 | -1,240741087 | -0,23009213 |  |
| 1568691_at   | -                | 1,094335495  | 1,324440845  | -0,23010535 |  |
| 209342_s_at  | IKBKB            | 1,094335495  | 1,324440845  | -0,23010535 |  |
| 1553837_at   | PGAM5            | -0,366776884 | -0,136643983 | -0,2301329  |  |
| 1554962_a_at | FGFR4            | -0,366776884 | -0,136643983 | -0,2301329  |  |
| 1570133_at   | -                | -0,366776884 | -0,136643983 | -0,2301329  |  |
| 214401_at    | PAX1             | -0,366776884 | -0,136643983 | -0,2301329  |  |
| 233391_at    | CDH26            | -0,366776884 | -0,136643983 | -0,2301329  |  |
| 233676_at    | -                | -0,366776884 | -0,136643983 | -0,2301329  |  |
| 218083_at    | PTGES2           | 1,560488174  | 1,790660532  | -0,23017236 |  |
| 213378_s_at  | DDX11 /// DDX12  | 0,44160593   | 0,67181667   | -0,23021074 |  |
| 213408_s_at  | PI4KA /// PI4KAP | 3,092667038  | 3,323041804  | -0,23037477 |  |
| 225712_at    | GEMIN5           | 3,568395593  | 3,798818761  | -0,23042317 |  |
| 218016_s_at  | POLR3E           | 3,205636958  | 3,436090594  | -0,23045364 |  |
| 1554390_s_at | ACTR2            | 3,270743649  | 3,501209806  | -0,23046616 |  |
| 232660_at    | BAD              | 0,702292136  | 0,932882274  | -0,23059014 |  |
| 225752_at    | NIPA1            | 1,649074067  | 1,879785595  | -0,23071153 |  |
| 208445_s_at  | BAZ1B            | 3,191547726  | 3,42231092   | -0,23076319 |  |
| 222133_s_at  | PHF20L1          | 1,331241794  | 1,562009954  | -0,23076816 |  |
| 1555198_x_at | C21orf58         | 1,063722698  | 1,294497133  | -0,23077444 |  |
| 222671_s_at  | JMJD4            | 1,063722698  | 1,294497133  | -0,23077444 |  |
| 235425_at    | SGOL2            | 1,575032557  | 1,805902329  | -0,23086977 |  |
| 204574_s_at  | MMP19            | 0,555999837  | 0,786897721  | -0,23089788 |  |
| 239937_at    | ZNF207           | 0,555999837  | 0,786897721  | -0,23089788 |  |
| 206506_s_at  | SUPT3H           | 1,951783949  | 2,182705233  | -0,23092128 |  |
| 37254_at     | ZNF133           | 1,554996004  | 1,786056415  | -0,23106041 |  |
| 212983_at    | HRAS             | 2,201862497  | 2,432926755  | -0,23106426 |  |
| 212498_at    | -                | 4,091545995  | 4,322631888  | -0,23108589 |  |
| 213218_at    | ZNF187           | 1,814495998  | 2,045615873  | -0,23111987 |  |
| 1554343_a_at | STAP1            | 0,798390451  | 1,029536893  | -0,23114644 |  |
| 44120_at     | ADCK2            | 2,145726274  | 2,376875125  | -0,23114885 |  |
| 235436_at    | DDX31            | 1,139070151  | 1,370274469  | -0,23120432 |  |
| 206500_s_at  | MIS18BP1         | 1,534677255  | 1,765933685  | -0,23125643 |  |
| 221545_x_at  | MED16            | 1,780386218  | 2,011838132  | -0,23145191 |  |
| 210663_s_at  | KYNU             | 1,187200746  | 1,418668082  | -0,23146734 |  |
| 214181_x_at  | LST1             | 0,661985843  | 0,893473268  | -0,23148743 |  |
| 217605_at    | USP27X           | 0,661985843  | 0,893473268  | -0,23148743 |  |

|              |                 |              |              |             |  |
|--------------|-----------------|--------------|--------------|-------------|--|
| 242862_x_at  | -               | 0,661985843  | 0,893473268  | -0,23148743 |  |
| 1554841_at   | MTHFD2L         | -0,172274514 | 0,059218869  | -0,23149338 |  |
| 204158_s_at  | TCIRG1          | -0,172274514 | 0,059218869  | -0,23149338 |  |
| 204828_at    | RAD9A           | 1,348276312  | 1,579853228  | -0,23157692 |  |
| 209045_at    | XPNPEP1         | 4,272544123  | 4,504121829  | -0,23157771 |  |
| 218472_s_at  | PELO            | 2,779171778  | 3,010820719  | -0,23164894 |  |
| 223337_at    | CWC27           | 2,462640593  | 2,694398145  | -0,23175755 |  |
| 236699_at    | -               | 2,410880861  | 2,64270545   | -0,23182459 |  |
| 238109_at    | -               | 1,549482847  | 1,781437557  | -0,23195471 |  |
| 221832_s_at  | LUZP1           | 2,082235068  | 2,314300277  | -0,23206521 |  |
| 1561195_at   | -               | -0,055687482 | 0,176436073  | -0,23212356 |  |
| 91703_at     | EHBP1L1         | 0,986944009  | 1,219079422  | -0,23213541 |  |
| 202487_s_at  | H2AFV           | 5,231023008  | 5,463184079  | -0,23216107 |  |
| 208501_at    | GFI1B           | 3,617524043  | 3,849713445  | -0,2321894  |  |
| 206300_s_at  | PTHLH           | 1,726031811  | 1,958277216  | -0,23224541 |  |
| 207380_x_at  | NOX1            | -0,622910612 | -0,39061235  | -0,23229826 |  |
| 211827_s_at  | KCND3           | -0,622910612 | -0,39061235  | -0,23229826 |  |
| 220571_at    | PRDM11          | -0,622910612 | -0,39061235  | -0,23229826 |  |
| 240387_at    | UBASH3B         | -0,622910612 | -0,39061235  | -0,23229826 |  |
| 240654_at    | -               | -0,622910612 | -0,39061235  | -0,23229826 |  |
| 211157_at    | -               | 0,822971223  | 1,055274826  | -0,2323036  |  |
| 202902_s_at  | CTSS            | 1,883312263  | 2,115788273  | -0,23247601 |  |
| 218407_x_at  | NENF            | 3,223057183  | 3,455550298  | -0,23249311 |  |
| 220358_at    | BATF3           | 0,882651021  | 1,115234684  | -0,23258366 |  |
| 226518_at    | KCTD10          | 3,025418883  | 3,258033502  | -0,23261462 |  |
| 212350_at    | TBC1D1          | 1,820612054  | 2,053299695  | -0,23268764 |  |
| 209643_s_at  | PLD2            | 0,425644434  | 0,658444279  | -0,23279985 |  |
| 208962_s_at  | FADS1 /// MIR19 | 0,103263601  | 0,336136178  | -0,23287258 |  |
| 205774_at    | F12             | 2,580856819  | 2,813804482  | -0,23294766 |  |
| 204175_at    | ZNF593          | 3,159334685  | 3,392332256  | -0,23299757 |  |
| 212520_s_at  | SMARCA4         | 4,237544359  | 4,470561285  | -0,23301693 |  |
| 225526_at    | MKLN1           | 2,802535172  | 3,035599287  | -0,23306412 |  |
| 224825_at    | DNTTIP1         | 3,474545391  | 3,707626508  | -0,23308112 |  |
| 224848_at    | CDK6            | 3,236843482  | 3,469974737  | -0,23313125 |  |
| 242554_at    | TPCN2           | -1,089016378 | -0,855751026 | -0,23326535 |  |
| 242971_at    | -               | -1,089016378 | -0,855751026 | -0,23326535 |  |
| 243879_at    | -               | -1,089016378 | -0,855751026 | -0,23326535 |  |
| 219041_s_at  | REPIN1          | 4,817015836  | 5,050289902  | -0,23327407 |  |
| 240015_at    | LOC439949       | 0,20027154   | 0,433557298  | -0,23328576 |  |
| 207767_s_at  | EGR4            | 1,04816921   | 1,281471383  | -0,23330217 |  |
| 1553356_at   | -               | -3,013665402 | -2,780313924 | -0,23335148 |  |
| 1555471_a_at | FMN2            | -3,013665402 | -2,780313924 | -0,23335148 |  |
| 1558404_at   | LOC644242       | -3,013665402 | -2,780313924 | -0,23335148 |  |
| 1561521_at   | S100B           | -3,013665402 | -2,780313924 | -0,23335148 |  |
| 1562459_at   | -               | -3,013665402 | -2,780313924 | -0,23335148 |  |
| 1569433_at   | SAMD5           | -3,013665402 | -2,780313924 | -0,23335148 |  |
| 215229_at    | LOC100129973    | -3,013665402 | -2,780313924 | -0,23335148 |  |
| 217401_at    | -               | -3,013665402 | -2,780313924 | -0,23335148 |  |
| 228502_at    | RPS6KA6         | -3,013665402 | -2,780313924 | -0,23335148 |  |
| 228731_at    | GUCY1A2         | -3,013665402 | -2,780313924 | -0,23335148 |  |
| 231353_at    | -               | -3,013665402 | -2,780313924 | -0,23335148 |  |
| 233097_x_at  | -               | -3,013665402 | -2,780313924 | -0,23335148 |  |
| 233366_at    | FBXO4           | -3,013665402 | -2,780313924 | -0,23335148 |  |
| 237528_at    | -               | -3,013665402 | -2,780313924 | -0,23335148 |  |
| 238419_at    | PHLDB2          | -3,013665402 | -2,780313924 | -0,23335148 |  |
| 242063_s_at  | -               | -3,013665402 | -2,780313924 | -0,23335148 |  |

|              |                  |              |              |             |  |
|--------------|------------------|--------------|--------------|-------------|--|
| 242086_at    | SPATA6           | -3,013665402 | -2,780313924 | -0,23335148 |  |
| 222768_s_at  | TRMT6            | 3,292909151  | 3,526272152  | -0,233363   |  |
| 219990_at    | E2F8             | 3,067171967  | 3,300620584  | -0,23344862 |  |
| 226934_at    | CPSF6            | 2,701760055  | 2,935211251  | -0,2334512  |  |
| 205180_s_at  | ADAM8            | 0,246434561  | 0,479907041  | -0,23347248 |  |
| 206818_s_at  | CNNM2            | 0,246434561  | 0,479907041  | -0,23347248 |  |
| 241713_s_at  | DYX1C1 /// DYX1  | 0,246434561  | 0,479907041  | -0,23347248 |  |
| 226216_at    | INSR             | 1,292162421  | 1,525647381  | -0,23348496 |  |
| 219692_at    | KREMEN2          | 0,613492853  | 0,847075464  | -0,23358261 |  |
| 235803_at    | -                | 0,613492853  | 0,847075464  | -0,23358261 |  |
| 1555895_at   | DNM2             | 2,621710292  | 2,855418981  | -0,23370869 |  |
| 227445_at    | ZNF689           | 1,844820248  | 2,078620836  | -0,23380059 |  |
| 232382_s_at  | PCMTD1           | 1,844820248  | 2,078620836  | -0,23380059 |  |
| 206053_at    | ZNF510           | 0,334552598  | 0,568365095  | -0,2338125  |  |
| 212502_at    | ADO              | 1,889144008  | 2,123108223  | -0,23396422 |  |
| 225662_at    | ZAK              | 1,889144008  | 2,123108223  | -0,23396422 |  |
| 228027_at    | ARMCX5-GPRAS     | 1,889144008  | 2,123108223  | -0,23396422 |  |
| 216474_x_at  | TPSAB1 /// TPSE  | 0,715481152  | 0,949447784  | -0,23396663 |  |
| 223354_x_at  | MFF              | 0,715481152  | 0,949447784  | -0,23396663 |  |
| 228778_at    | MCPH1            | 0,715481152  | 0,949447784  | -0,23396663 |  |
| 211996_s_at  | 61E3.4 /// LOC10 | 3,260656977  | 3,49464046   | -0,23398348 |  |
| 1555006_at   | WDR66            | -1,2845686   | -1,050406615 | -0,23416199 |  |
| 1556339_a_at | -                | -1,2845686   | -1,050406615 | -0,23416199 |  |
| 1559620_at   | LOC441167        | -1,2845686   | -1,050406615 | -0,23416199 |  |
| 1566527_at   | -                | -1,2845686   | -1,050406615 | -0,23416199 |  |
| 205795_at    | NRXN3            | -1,2845686   | -1,050406615 | -0,23416199 |  |
| 207403_at    | IRS4             | -1,2845686   | -1,050406615 | -0,23416199 |  |
| 208013_s_at  | ACRV1            | -1,2845686   | -1,050406615 | -0,23416199 |  |
| 208126_s_at  | CYP2C18          | -1,2845686   | -1,050406615 | -0,23416199 |  |
| 221110_x_at  | PDE11A           | -1,2845686   | -1,050406615 | -0,23416199 |  |
| 221232_s_at  | ANKRD2           | -1,2845686   | -1,050406615 | -0,23416199 |  |
| 222241_at    | -                | -1,2845686   | -1,050406615 | -0,23416199 |  |
| 227831_at    | TMEM245          | -1,2845686   | -1,050406615 | -0,23416199 |  |
| 241331_at    | SKAP2            | -1,2845686   | -1,050406615 | -0,23416199 |  |
| 242847_at    | C11orf30         | -1,2845686   | -1,050406615 | -0,23416199 |  |
| 205647_at    | RAD52            | 0,457392764  | 0,691645685  | -0,23425292 |  |
| 236036_at    | LOC100506343     | 0,457392764  | 0,691645685  | -0,23425292 |  |
| 237456_at    | -                | 0,457392764  | 0,691645685  | -0,23425292 |  |
| 223304_at    | SLC37A3          | 2,107467633  | 2,341749893  | -0,23428226 |  |
| 223236_at    | NSRP1            | 2,857110344  | 3,091398163  | -0,23428782 |  |
| 205489_at    | CRYM             | 3,51093129   | 3,745272377  | -0,23434109 |  |
| 223012_at    | UBXN6            | 3,330897748  | 3,565308644  | -0,2344109  |  |
| 1553829_at   | CYP1B1-AS1       | -2,64318869  | -2,408705138 | -0,23448355 |  |
| 1555186_at   | -                | -2,64318869  | -2,408705138 | -0,23448355 |  |
| 1556810_a_at | -                | -2,64318869  | -2,408705138 | -0,23448355 |  |
| 1556921_at   | -                | -2,64318869  | -2,408705138 | -0,23448355 |  |
| 1558406_a_at | -                | -2,64318869  | -2,408705138 | -0,23448355 |  |
| 1559149_at   | -                | -2,64318869  | -2,408705138 | -0,23448355 |  |
| 1560306_at   | -                | -2,64318869  | -2,408705138 | -0,23448355 |  |
| 1561113_at   | -                | -2,64318869  | -2,408705138 | -0,23448355 |  |
| 1561966_at   | -                | -2,64318869  | -2,408705138 | -0,23448355 |  |
| 207241_at    | C4orf6           | -2,64318869  | -2,408705138 | -0,23448355 |  |
| 217533_x_at  | -                | -2,64318869  | -2,408705138 | -0,23448355 |  |
| 228621_at    | HFE2             | -2,64318869  | -2,408705138 | -0,23448355 |  |
| 232468_at    | -                | -2,64318869  | -2,408705138 | -0,23448355 |  |
| 234525_at    | DKFZP761C1711    | -2,64318869  | -2,408705138 | -0,23448355 |  |

|             |                 |              |              |             |  |
|-------------|-----------------|--------------|--------------|-------------|--|
| 236968_at   | CCER1           | -2,64318869  | -2,408705138 | -0,23448355 |  |
| 237593_at   | -               | -2,64318869  | -2,408705138 | -0,23448355 |  |
| 239345_at   | SLC19A3         | -2,64318869  | -2,408705138 | -0,23448355 |  |
| 240453_at   | C20orf26        | -2,64318869  | -2,408705138 | -0,23448355 |  |
| 242626_at   | SAMD5           | -2,64318869  | -2,408705138 | -0,23448355 |  |
| 204225_at   | HDAC4           | 1,143956113  | 1,378453643  | -0,23449753 |  |
| 221556_at   | CDC14B          | 1,143956113  | 1,378453643  | -0,23449753 |  |
| 204986_s_at | TAOK2           | 0,533835206  | 0,768343791  | -0,23450858 |  |
| 1562944_at  | ZNF707          | -0,394749123 | -0,160136748 | -0,23461237 |  |
| 205455_at   | MST1R           | -0,394749123 | -0,160136748 | -0,23461237 |  |
| 210305_at   | PDE4DIP         | -0,394749123 | -0,160136748 | -0,23461237 |  |
| 238955_at   | RFTN2           | -0,394749123 | -0,160136748 | -0,23461237 |  |
| 222146_s_at | TCF4            | 0,57058931   | 0,805216064  | -0,23462675 |  |
| 202420_s_at | DHX9            | 3,439206878  | 3,673964604  | -0,23475773 |  |
| 230631_s_at | LOC100288432    | 0,641402394  | 0,876248481  | -0,23484609 |  |
| 208773_s_at | ANKHD1 /// ANK  | 3,636716366  | 3,871608557  | -0,23489219 |  |
| 233732_at   | LOC401320       | 1,283332461  | 1,518263577  | -0,23493112 |  |
| 238532_at   | DPF3            | 1,283332461  | 1,518263577  | -0,23493112 |  |
| 214853_s_at | SHC1            | 4,470285158  | 4,705281859  | -0,2349967  |  |
| 208705_s_at | EIF5            | 5,467663228  | 5,702683777  | -0,23502055 |  |
| 204220_at   | GMFG            | 5,289517436  | 5,524586889  | -0,23506945 |  |
| 217840_at   | DDX41           | 3,375201825  | 3,61027875   | -0,23507693 |  |
| 227658_s_at | PLEKHA3         | 1,58584542   | 1,820984782  | -0,23513936 |  |
| 212480_at   | SPECC1L         | 2,520143371  | 2,755336312  | -0,23519294 |  |
| 218153_at   | CARS2           | 2,281618189  | 2,516830926  | -0,23521274 |  |
| 216202_s_at | SPTLC2          | 3,164152611  | 3,399383202  | -0,23523059 |  |
| 214512_s_at | SUB1            | 6,085475914  | 6,320733573  | -0,23525766 |  |
| 205917_at   | ZNF264          | -0,259832361 | -0,024572586 | -0,23525977 |  |
| 208408_at   | PTN             | -0,259832361 | -0,024572586 | -0,23525977 |  |
| 214228_x_at | TNFRSF4         | -0,259832361 | -0,024572586 | -0,23525977 |  |
| 224117_at   | LOC284912 /// M | -0,259832361 | -0,024572586 | -0,23525977 |  |
| 234300_s_at | ZFP28           | -0,259832361 | -0,024572586 | -0,23525977 |  |
| 243454_at   | -               | -0,259832361 | -0,024572586 | -0,23525977 |  |
| 243937_x_at | AGAP4 /// AGAP  | -0,259832361 | -0,024572586 | -0,23525977 |  |
| 209086_x_at | MCAM            | 3,325531666  | 3,560823412  | -0,23529175 |  |
| 201704_at   | ENTPD6          | 2,314494121  | 2,549796788  | -0,23530267 |  |
| 218707_at   | ZNF444          | 1,672933557  | 1,908311039  | -0,23537748 |  |
| 241353_s_at | LOC100507507    | 3,014789032  | 3,250254796  | -0,23546576 |  |
| 213392_at   | IQCK            | 2,771299138  | 3,006869115  | -0,23556998 |  |
| 204520_x_at | BRD1            | 1,965648824  | 2,201267805  | -0,23561898 |  |
| 40687_at    | GJA4            | -2,147347388 | -1,911686463 | -0,23566092 |  |
| 1554782_at  | KLHL30-AS1      | -0,078265071 | 0,157549243  | -0,23581431 |  |
| 210391_at   | NR6A1           | -0,078265071 | 0,157549243  | -0,23581431 |  |
| 234285_at   | SYNGAP1         | -0,078265071 | 0,157549243  | -0,23581431 |  |
| 1565446_at  | HPRT1           | -3,41365796  | -3,177802286 | -0,23585567 |  |
| 222067_x_at | HIST1H2BD       | 5,510855358  | 5,746789322  | -0,23593396 |  |
| 203260_at   | HDDC2           | 1,406361373  | 1,642321262  | -0,23595989 |  |
| 213538_at   | SON             | 2,109966786  | 2,345926937  | -0,23596015 |  |
| 228120_at   | EIF2C1          | 2,146943689  | 2,382985886  | -0,2360422  |  |
| 1563283_at  | -               | 0,03125738   | 0,26733076   | -0,23607338 |  |
| 205592_at   | SLC4A1          | 0,03125738   | 0,26733076   | -0,23607338 |  |
| 215265_at   | EMX1            | 0,03125738   | 0,26733076   | -0,23607338 |  |
| 239227_at   | -               | 0,03125738   | 0,26733076   | -0,23607338 |  |
| 223770_x_at | MRI1            | 1,990274687  | 2,226407528  | -0,23613284 |  |
| 203176_s_at | TFAM            | 2,596981013  | 2,833274877  | -0,23629386 |  |
| 218057_x_at | EMC8            | 4,354393475  | 4,590711136  | -0,23631766 |  |

|              |              |              |              |             |  |
|--------------|--------------|--------------|--------------|-------------|--|
| 233874_at    | SLAIN2       | 0,82905153   | 1,065442793  | -0,23639126 |  |
| 225489_at    | TMEM18       | 1,318332599  | 1,55481039   | -0,23647779 |  |
| 1568600_at   | CALML4       | -0,85085127  | -0,614371577 | -0,23647969 |  |
| 208871_at    | ATN1         | -0,85085127  | -0,614371577 | -0,23647969 |  |
| 220273_at    | IL17B        | -0,85085127  | -0,614371577 | -0,23647969 |  |
| 221238_at    | HMG5         | -0,85085127  | -0,614371577 | -0,23647969 |  |
| 223587_s_at  | AMN          | -0,85085127  | -0,614371577 | -0,23647969 |  |
| 228187_at    | -            | -0,85085127  | -0,614371577 | -0,23647969 |  |
| 233433_at    | -            | -0,85085127  | -0,614371577 | -0,23647969 |  |
| 226428_at    | TNPO2        | 3,296204798  | 3,532699346  | -0,23649455 |  |
| 222747_s_at  | SCML1        | 1,360921491  | 1,59747851   | -0,23655702 |  |
| 213603_s_at  | RAC2         | 5,383147391  | 5,619727846  | -0,23658046 |  |
| 1557030_at   | GAB1         | -2,972500237 | -2,735862426 | -0,23663781 |  |
| 1557758_at   | -            | -2,972500237 | -2,735862426 | -0,23663781 |  |
| 1558623_at   | LOC729121    | -2,972500237 | -2,735862426 | -0,23663781 |  |
| 1560547_at   | -            | -2,972500237 | -2,735862426 | -0,23663781 |  |
| 1561517_at   | SSPN         | -2,972500237 | -2,735862426 | -0,23663781 |  |
| 1563833_at   | -            | -2,972500237 | -2,735862426 | -0,23663781 |  |
| 1568574_x_at | SPP1         | -2,972500237 | -2,735862426 | -0,23663781 |  |
| 1570398_at   | FAM47E       | -2,972500237 | -2,735862426 | -0,23663781 |  |
| 207415_at    | PLA2R1       | -2,972500237 | -2,735862426 | -0,23663781 |  |
| 209125_at    | KRT6A        | -2,972500237 | -2,735862426 | -0,23663781 |  |
| 212592_at    | IGJ          | -2,972500237 | -2,735862426 | -0,23663781 |  |
| 216839_at    | LAMA2        | -2,972500237 | -2,735862426 | -0,23663781 |  |
| 233547_x_at  | PDE1A        | -2,972500237 | -2,735862426 | -0,23663781 |  |
| 233576_at    | HMGCLL1      | -2,972500237 | -2,735862426 | -0,23663781 |  |
| 236538_at    | GRIA2        | -2,972500237 | -2,735862426 | -0,23663781 |  |
| 239519_at    | -            | -2,972500237 | -2,735862426 | -0,23663781 |  |
| 240420_at    | AADACL2      | -2,972500237 | -2,735862426 | -0,23663781 |  |
| 240575_at    | -            | -2,972500237 | -2,735862426 | -0,23663781 |  |
| 1562323_at   | -            | 0,317354302  | 0,553993624  | -0,23663932 |  |
| 239512_at    | SRSF4        | 0,401366113  | 0,638150376  | -0,23678426 |  |
| 221821_s_at  | KANSL2       | 3,364775978  | 3,601570866  | -0,23679489 |  |
| 213804_at    | INPP5B       | 1,153678675  | 1,390636111  | -0,23695744 |  |
| 1560214_at   | -            | 1,224581536  | 1,461646549  | -0,23706501 |  |
| 209462_at    | APLP1        | 1,224581536  | 1,461646549  | -0,23706501 |  |
| 210162_s_at  | NFATC1       | 2,077135162  | 2,314300277  | -0,23716512 |  |
| 213760_s_at  | ZNF330       | 2,970093718  | 3,207279726  | -0,23718601 |  |
| 211729_x_at  | BLVRA        | 2,139623739  | 2,376875125  | -0,23725139 |  |
| 204571_x_at  | PIN4         | 3,24026957   | 3,477609204  | -0,23733963 |  |
| 1553905_at   | CXorf22      | -0,655928373 | -0,41858459  | -0,23734378 |  |
| 1564367_at   | CXXC1P1      | -0,655928373 | -0,41858459  | -0,23734378 |  |
| 211366_x_at  | CASP1        | -0,655928373 | -0,41858459  | -0,23734378 |  |
| 215815_at    | BUD31        | -0,655928373 | -0,41858459  | -0,23734378 |  |
| 219511_s_at  | SNCAIP       | -0,655928373 | -0,41858459  | -0,23734378 |  |
| 220413_at    | SLC39A2      | -0,655928373 | -0,41858459  | -0,23734378 |  |
| 232480_at    | MIRLET7BHG   | -0,655928373 | -0,41858459  | -0,23734378 |  |
| 237678_at    | -            | -0,655928373 | -0,41858459  | -0,23734378 |  |
| 242841_at    | LOC100505570 | -0,655928373 | -0,41858459  | -0,23734378 |  |
| 235513_at    | -            | 0,792179257  | 1,029536893  | -0,23735764 |  |
| 209705_at    | MTF2         | 2,760204767  | 2,997606395  | -0,23740163 |  |
| 212783_at    | RBBP6        | 2,760204767  | 2,997606395  | -0,23740163 |  |
| 221712_s_at  | WDR74        | 3,634114217  | 3,871608557  | -0,23749434 |  |
| 227653_at    | TRMT5        | 3,655656719  | 3,893176339  | -0,23751962 |  |
| 201965_s_at  | SETX         | 1,774096855  | 2,011838132  | -0,23774128 |  |
| 228655_at    | -            | -0,033456564 | 0,204310755  | -0,23776732 |  |

|              |                 |              |              |             |  |
|--------------|-----------------|--------------|--------------|-------------|--|
| 236940_at    | -               | -0,033456564 | 0,204310755  | -0,23776732 |  |
| 1554703_at   | ARHGEF10        | 0,072842263  | 0,310717132  | -0,23787487 |  |
| 215204_at    | -               | 0,072842263  | 0,310717132  | -0,23787487 |  |
| 217813_s_at  | SPIN1           | 0,072842263  | 0,310717132  | -0,23787487 |  |
| 236382_at    | WRAP73          | 0,072842263  | 0,310717132  | -0,23787487 |  |
| 208074_s_at  | AP2S1           | 5,695655083  | 5,933578772  | -0,23792369 |  |
| 1558893_a_at | CCDC67          | -3,192553003 | -2,954576755 | -0,23797625 |  |
| 1566439_at   | -               | -3,192553003 | -2,954576755 | -0,23797625 |  |
| 238458_at    | EFHA2           | -3,192553003 | -2,954576755 | -0,23797625 |  |
| 225100_at    | FBXO45          | 0,351548291  | 0,589657387  | -0,2381091  |  |
| 201648_at    | JAK1            | 5,076043943  | 5,314189382  | -0,23814544 |  |
| 219201_s_at  | TWSG1           | 1,655931423  | 1,894118818  | -0,23818739 |  |
| 203658_at    | SLC25A20        | 1,305306849  | 1,543943227  | -0,23863638 |  |
| 218475_at    | TRMT2A          | 1,369290453  | 1,60795124   | -0,23866079 |  |
| 223170_at    | TMEM98          | 2,822481847  | 3,061230246  | -0,2387484  |  |
| 231715_s_at  | PYCR2           | 3,202127528  | 3,440980183  | -0,23885265 |  |
| 1556736_at   | LOC100129858    | -0,496991414 | -0,258114234 | -0,23887718 |  |
| 201402_at    | ADRBK1          | -0,496991414 | -0,258114234 | -0,23887718 |  |
| 219339_s_at  | EHMT1           | -0,496991414 | -0,258114234 | -0,23887718 |  |
| 221793_at    | DOCK6           | -0,496991414 | -0,258114234 | -0,23887718 |  |
| 227011_at    | ZNF672          | -0,496991414 | -0,258114234 | -0,23887718 |  |
| 233430_at    | TBC1D22B        | -0,496991414 | -0,258114234 | -0,23887718 |  |
| 233694_at    | HSPA1L          | -0,496991414 | -0,258114234 | -0,23887718 |  |
| 237854_at    | -               | -0,496991414 | -0,258114234 | -0,23887718 |  |
| 211929_at    | HNRNPA3         | 4,006916639  | 4,245917359  | -0,23900072 |  |
| 204593_s_at  | SMCR7L          | 3,335176289  | 3,574237491  | -0,2390612  |  |
| 218549_s_at  | FAM82B          | 3,854300588  | 4,093403416  | -0,23910283 |  |
| 227790_at    | UBE3D           | 2,127340679  | 2,366632651  | -0,23929197 |  |
| 230918_at    | -               | 1,139070151  | 1,378453643  | -0,23938349 |  |
| 207522_s_at  | ATP2A3          | 0,928678725  | 1,16809119   | -0,23941247 |  |
| 1556722_a_at | C20orf203       | 0,841135803  | 1,080561626  | -0,23942582 |  |
| 205771_s_at  | AKAP7           | 0,747935635  | 0,987376598  | -0,23944096 |  |
| 226324_s_at  | IFT172          | 0,682279745  | 0,921731975  | -0,23945223 |  |
| 1552381_at   | SRSF12          | 0,384950573  | 0,624460759  | -0,23951019 |  |
| 1568667_s_at | PLIN5           | 0,384950573  | 0,624460759  | -0,23951019 |  |
| 204973_at    | GJB1            | 0,384950573  | 0,624460759  | -0,23951019 |  |
| 217149_x_at  | TNK1            | -0,285837228 | -0,046302147 | -0,23953508 |  |
| 222937_s_at  | MMP28           | -0,285837228 | -0,046302147 | -0,23953508 |  |
| 232825_s_at  | DSEL            | -0,285837228 | -0,046302147 | -0,23953508 |  |
| 241984_at    | FOXN3           | -0,285837228 | -0,046302147 | -0,23953508 |  |
| 210373_at    | NPRL2           | 0,255492549  | 0,495031851  | -0,2395393  |  |
| 230630_at    | AK4 /// LOC1005 | 0,255492549  | 0,495031851  | -0,2395393  |  |
| 232838_at    | ASXL3           | 2,310153708  | 2,549796788  | -0,23964308 |  |
| 218032_at    | SNN             | 2,243430036  | 2,483094137  | -0,2396641  |  |
| 1565806_at   | FLJ37035        | -3,37835     | -3,138626879 | -0,23972312 |  |
| 1569761_x_at | -               | -3,37835     | -3,138626879 | -0,23972312 |  |
| 242296_x_at  | -               | -3,37835     | -3,138626879 | -0,23972312 |  |
| 243549_at    | -               | -3,37835     | -3,138626879 | -0,23972312 |  |
| 1552722_at   | ARPP21          | -2,930741289 | -2,690860744 | -0,23988055 |  |
| 1559163_at   | INHBA-AS1       | -2,930741289 | -2,690860744 | -0,23988055 |  |
| 1560322_at   | RBMS3           | -2,930741289 | -2,690860744 | -0,23988055 |  |
| 204926_at    | INHBA           | -2,930741289 | -2,690860744 | -0,23988055 |  |
| 205907_s_at  | OMD             | -2,930741289 | -2,690860744 | -0,23988055 |  |
| 211006_s_at  | KCNB1           | -2,930741289 | -2,690860744 | -0,23988055 |  |
| 211367_s_at  | CASP1           | -2,930741289 | -2,690860744 | -0,23988055 |  |
| 215944_at    | -               | -2,930741289 | -2,690860744 | -0,23988055 |  |

|              |           |              |              |             |  |
|--------------|-----------|--------------|--------------|-------------|--|
| 220670_at    | -         | -2,930741289 | -2,690860744 | -0,23988055 |  |
| 220836_at    | ZNF407    | -2,930741289 | -2,690860744 | -0,23988055 |  |
| 230365_at    | LIN9      | -2,930741289 | -2,690860744 | -0,23988055 |  |
| 231539_at    | -         | -2,930741289 | -2,690860744 | -0,23988055 |  |
| 240776_at    | -         | -2,930741289 | -2,690860744 | -0,23988055 |  |
| 241029_at    | -         | -2,930741289 | -2,690860744 | -0,23988055 |  |
| 243573_at    | -         | -2,930741289 | -2,690860744 | -0,23988055 |  |
| 244508_at    | 39326     | -2,930741289 | -2,690860744 | -0,23988055 |  |
| 225620_at    | RAB35     | 2,159061673  | 2,39915583   | -0,24009416 |  |
| 213137_s_at  | PTPN2     | 2,644299732  | 2,884425449  | -0,24012572 |  |
| 202255_s_at  | SIPA1L1   | 2,084778276  | 2,324919719  | -0,24014144 |  |
| 204131_s_at  | FOXO3     | 3,032022986  | 3,272369332  | -0,24034635 |  |
| 217200_x_at  | CYB561    | 1,67631007   | 1,916759838  | -0,24044977 |  |
| 213289_at    | APOOL     | 1,534677255  | 1,775255987  | -0,24057873 |  |
| 1561545_at   | EPN2-AS1  | -1,353583928 | -1,112851844 | -0,24073208 |  |
| 1561557_at   | -         | -1,353583928 | -1,112851844 | -0,24073208 |  |
| 203539_s_at  | -         | -1,353583928 | -1,112851844 | -0,24073208 |  |
| 203993_x_at  | C21orf2   | -1,353583928 | -1,112851844 | -0,24073208 |  |
| 207557_s_at  | RYR2      | -1,353583928 | -1,112851844 | -0,24073208 |  |
| 216150_at    | -         | -1,353583928 | -1,112851844 | -0,24073208 |  |
| 221392_at    | TAS2R4    | -1,353583928 | -1,112851844 | -0,24073208 |  |
| 224438_at    | -         | -1,353583928 | -1,112851844 | -0,24073208 |  |
| 228682_at    | -         | -1,353583928 | -1,112851844 | -0,24073208 |  |
| 229354_at    | AHRR      | -1,353583928 | -1,112851844 | -0,24073208 |  |
| 232474_at    | -         | -1,353583928 | -1,112851844 | -0,24073208 |  |
| 237297_at    | FAM53B    | -1,353583928 | -1,112851844 | -0,24073208 |  |
| 237317_at    | -         | -1,353583928 | -1,112851844 | -0,24073208 |  |
| 243798_at    | -         | -1,353583928 | -1,112851844 | -0,24073208 |  |
| 209203_s_at  | BICD2     | 0,496120222  | 0,73688026   | -0,24076004 |  |
| 232892_at    | C20orf166 | 0,496120222  | 0,73688026   | -0,24076004 |  |
| 228902_at    | NUP214    | 2,247975581  | 2,488772006  | -0,24079642 |  |
| 209276_s_at  | GLRX      | 4,842035783  | 5,082876522  | -0,24084074 |  |
| 1557319_at   | -         | 0,417596971  | 0,658444279  | -0,24084731 |  |
| 242157_at    | CHD9      | 0,417596971  | 0,658444279  | -0,24084731 |  |
| 201227_s_at  | NDUFB8    | 5,632307038  | 5,873179272  | -0,24087223 |  |
| 1569032_at   | LOC642852 | -0,59053611  | -0,34958478  | -0,24095133 |  |
| 208124_s_at  | SEMA4F    | -0,59053611  | -0,34958478  | -0,24095133 |  |
| 213987_s_at  | CDK13     | -0,59053611  | -0,34958478  | -0,24095133 |  |
| 236673_at    | TIFAB     | -0,59053611  | -0,34958478  | -0,24095133 |  |
| 240397_x_at  | -         | -0,59053611  | -0,34958478  | -0,24095133 |  |
| 244349_at    | -         | -0,59053611  | -0,34958478  | -0,24095133 |  |
| 219952_s_at  | MCOLN1    | 1,177702228  | 1,418668082  | -0,24096585 |  |
| 226969_at    | MTR       | 2,396622324  | 2,637603218  | -0,24098089 |  |
| 217073_x_at  | APOA1     | 0,291166226  | 0,532164371  | -0,24099814 |  |
| 236703_at    | NT5C2     | 0,291166226  | 0,532164371  | -0,24099814 |  |
| 218682_s_at  | SLC4A1AP  | 2,37600538   | 2,617011906  | -0,24100653 |  |
| 236607_at    | -         | 1,129248302  | 1,370274469  | -0,24102617 |  |
| 203959_s_at  | ZBTB40    | 2,001086023  | 2,242180416  | -0,24109439 |  |
| 209202_s_at  | EXTL3     | 1,05337236   | 1,294497133  | -0,24112477 |  |
| 220319_s_at  | MYLIP     | 3,078700536  | 3,319860027  | -0,24115949 |  |
| 204232_at    | FCER1G    | 0,152582607  | 0,393761504  | -0,2411789  |  |
| 205561_at    | KCTD17    | 0,152582607  | 0,393761504  | -0,2411789  |  |
| 227927_at    | -         | 0,152582607  | 0,393761504  | -0,2411789  |  |
| 239316_at    | METTL12   | 0,152582607  | 0,393761504  | -0,2411789  |  |
| 211555_s_at  | GUCY1B3   | 0,052199481  | 0,293518836  | -0,24131936 |  |
| 1555167_s_at | NAMPT     | 1,829737795  | 2,071071048  | -0,24133325 |  |



|              |                  |              |              |             |  |
|--------------|------------------|--------------|--------------|-------------|--|
| 202701_at    | BMP1             | 0,888485433  | 1,129843209  | -0,24135778 |  |
| 203516_at    | SNTA1            | 0,888485433  | 1,129843209  | -0,24135778 |  |
| 213514_s_at  | DIAPH1           | 2,352981171  | 2,594367918  | -0,24138675 |  |
| 205483_s_at  | ISG15            | 6,492863082  | 6,734418381  | -0,2415553  |  |
| 206913_at    | BAAT             | -0,112808516 | 0,128747141  | -0,24155566 |  |
| 214219_x_at  | MAP4K1           | -0,112808516 | 0,128747141  | -0,24155566 |  |
| 216296_at    | CLTA             | -0,112808516 | 0,128747141  | -0,24155566 |  |
| 244373_at    | -                | -0,112808516 | 0,128747141  | -0,24155566 |  |
| 223792_at    | ZNF2             | 0,735041319  | 0,976641161  | -0,24159984 |  |
| 1552977_a_at | CNPY3            | 2,422991296  | 2,664608955  | -0,24161766 |  |
| 1563707_at   | -                | -0,43775896  | -0,19610998  | -0,24164898 |  |
| 1567906_at   | SOX4             | -0,43775896  | -0,19610998  | -0,24164898 |  |
| 230798_at    | -                | -0,43775896  | -0,19610998  | -0,24164898 |  |
| 241058_at    | -                | -0,43775896  | -0,19610998  | -0,24164898 |  |
| 210835_s_at  | CTBP2            | 3,471633352  | 3,713295978  | -0,24166263 |  |
| 1552543_a_at | STON2            | -0,234278768 | 0,007421914  | -0,24170068 |  |
| 214311_at    | ZFPL1            | -0,234278768 | 0,007421914  | -0,24170068 |  |
| 223727_at    | KCNIP2           | -0,234278768 | 0,007421914  | -0,24170068 |  |
| 232637_at    | 37500            | -0,234278768 | 0,007421914  | -0,24170068 |  |
| 1561449_at   | -                | -0,888496123 | -0,646746079 | -0,24175004 |  |
| 205088_at    | MAMLD1           | -0,888496123 | -0,646746079 | -0,24175004 |  |
| 215021_s_at  | NRXN3            | -0,888496123 | -0,646746079 | -0,24175004 |  |
| 216423_at    | -                | -0,888496123 | -0,646746079 | -0,24175004 |  |
| 223432_at    | OSBP2            | -0,888496123 | -0,646746079 | -0,24175004 |  |
| 224762_at    | SERINC2          | -0,888496123 | -0,646746079 | -0,24175004 |  |
| 231508_s_at  | -                | -0,888496123 | -0,646746079 | -0,24175004 |  |
| 240104_at    | -                | -0,888496123 | -0,646746079 | -0,24175004 |  |
| 224752_at    | C7orf73 /// LOC1 | 5,459847396  | 5,701665539  | -0,24181814 |  |
| 214232_at    | -                | 1,390002893  | 1,632095957  | -0,24209306 |  |
| 228931_at    | COQ4             | 2,348755185  | 2,590852465  | -0,24209728 |  |
| 210430_x_at  | RHD              | 0,995078803  | 1,23718272   | -0,24210392 |  |
| 231269_at    | ASCC3            | 1,348276312  | 1,590454215  | -0,2421779  |  |
| 205331_s_at  | REEP2            | 0,911589958  | 1,153866761  | -0,2422768  |  |
| 220159_at    | ABCA11P          | 0,911589958  | 1,153866761  | -0,2422768  |  |
| 240910_at    | -                | 0,911589958  | 1,153866761  | -0,2422768  |  |
| 217553_at    | STEAP1B          | 1,965648824  | 2,208167653  | -0,24251883 |  |
| 213313_at    | RABGAP1          | 3,858765357  | 4,101455318  | -0,24268996 |  |
| 233588_x_at  | PFDN6            | 4,091545995  | 4,334242016  | -0,24269602 |  |
| 34689_at     | TREX1            | 1,094335495  | 1,337086025  | -0,24275053 |  |
| 1554089_s_at | SBDS /// SBDSP   | 3,474545391  | 3,717332003  | -0,24278661 |  |
| 211810_s_at  | GALC             | 1,789769151  | 2,032717854  | -0,2429487  |  |
| 212844_at    | RRP1B            | 1,789769151  | 2,032717854  | -0,2429487  |  |
| 231866_at    | LNPEP            | 0,592200562  | 0,835239052  | -0,24303849 |  |
| 201480_s_at  | SUPT5H           | 3,205636958  | 3,448769219  | -0,24313226 |  |
| 203611_at    | TERF2            | 1,69307511   | 1,936283387  | -0,24320828 |  |
| 210740_s_at  | ITPK1            | 3,146001821  | 3,38929984   | -0,24329802 |  |
| 1562019_at   | NT5DC4           | 2,981056773  | 3,22439681   | -0,24334004 |  |
| 202861_at    | PER1             | 0,480753764  | 0,724100169  | -0,24334641 |  |
| 201182_s_at  | CHD4             | 2,277177578  | 2,520531219  | -0,24335364 |  |
| 237521_x_at  | -                | -3,342483913 | -3,098858316 | -0,2436256  |  |
| 240876_x_at  | C15orf43         | -3,342483913 | -3,098858316 | -0,2436256  |  |
| 225326_at    | RBM27            | 3,231115193  | 3,474751011  | -0,24363582 |  |
| 217221_x_at  | RBM10            | 2,938102794  | 3,181801492  | -0,2436987  |  |
| 225813_at    | RC3H2            | 2,938102794  | 3,181801492  | -0,2436987  |  |
| 228349_at    | KIAA1958         | 0,359971644  | 0,603679647  | -0,243708   |  |
| 230942_at    | CMTM5            | 0,359971644  | 0,603679647  | -0,243708   |  |

|              |                 |              |              |             |  |
|--------------|-----------------|--------------|--------------|-------------|--|
| 216326_s_at  | HDAC3           | 3,375201825  | 3,618934391  | -0,24373257 |  |
| 202219_at    | SLC6A8          | 3,312571045  | 3,556324192  | -0,24375315 |  |
| 238077_at    | KCTD6           | 2,429008604  | 2,672945617  | -0,24393701 |  |
| 217714_x_at  | MIR3917 /// STM | 0,273439642  | 0,51742585   | -0,24398621 |  |
| 235697_at    | -               | 0,273439642  | 0,51742585   | -0,24398621 |  |
| 205171_at    | PTPN4           | 0,95671774   | 1,200746069  | -0,24402833 |  |
| 223777_at    | DDX11L2         | 0,87091093   | 1,115234684  | -0,24432375 |  |
| 224776_at    | AGPAT6          | 2,718233611  | 2,962671751  | -0,24443814 |  |
| 1570281_at   | -               | 0,133056859  | 0,377530647  | -0,24447379 |  |
| 219462_at    | TMEM53          | 0,133056859  | 0,377530647  | -0,24447379 |  |
| 239670_at    | WNK2            | 0,133056859  | 0,377530647  | -0,24447379 |  |
| 238666_at    | -               | 1,292162421  | 1,536652708  | -0,24449029 |  |
| 1562460_at   | CNDP2           | 0,810733188  | 1,055274826  | -0,24454164 |  |
| 1559005_s_at | CNTLN           | -1,399512875 | -1,154897679 | -0,2446152  |  |
| 1564040_a_at | TMEM235         | -1,399512875 | -1,154897679 | -0,2446152  |  |
| 1566498_at   | -               | -1,399512875 | -1,154897679 | -0,2446152  |  |
| 202755_s_at  | GPC1            | -1,399512875 | -1,154897679 | -0,2446152  |  |
| 206082_at    | HCP5            | -1,399512875 | -1,154897679 | -0,2446152  |  |
| 208450_at    | LGALS2          | -1,399512875 | -1,154897679 | -0,2446152  |  |
| 210803_at    | TXNRD2          | -1,399512875 | -1,154897679 | -0,2446152  |  |
| 217046_s_at  | AGER            | -1,399512875 | -1,154897679 | -0,2446152  |  |
| 219014_at    | PLAC8           | -1,399512875 | -1,154897679 | -0,2446152  |  |
| 234777_at    | OR51M1          | -1,399512875 | -1,154897679 | -0,2446152  |  |
| 235932_x_at  | HMCN2 /// LOC1  | -1,399512875 | -1,154897679 | -0,2446152  |  |
| 236977_at    | LOC646588       | -1,399512875 | -1,154897679 | -0,2446152  |  |
| 237014_at    | MYBL1           | -1,399512875 | -1,154897679 | -0,2446152  |  |
| 237067_at    | -               | -1,399512875 | -1,154897679 | -0,2446152  |  |
| 242914_at    | -               | -1,399512875 | -1,154897679 | -0,2446152  |  |
| 200837_at    | BCAP31          | 4,070528765  | 4,31519468   | -0,24466591 |  |
| 208985_s_at  | EIF3J           | 4,368029766  | 4,612762285  | -0,24473252 |  |
| 233563_s_at  | CPSF3L          | 1,224581536  | 1,469325098  | -0,24474356 |  |
| 230426_at    | DLD             | 1,85379461   | 2,098562556  | -0,24476795 |  |
| 227180_at    | ELOVL7          | 2,771299138  | 3,016072743  | -0,24477361 |  |
| 225093_at    | UTRN            | 0,715481152  | 0,960386719  | -0,24490557 |  |
| 203105_s_at  | DNM1L           | 3,284083774  | 3,529030171  | -0,2449464  |  |
| 1553380_at   | PARP15          | -2,866296344 | -2,621331989 | -0,24496435 |  |
| 1553920_at   | C9orf84         | -2,866296344 | -2,621331989 | -0,24496435 |  |
| 1557578_at   | PHLDB2          | -2,866296344 | -2,621331989 | -0,24496435 |  |
| 1559621_at   | -               | -2,866296344 | -2,621331989 | -0,24496435 |  |
| 1559762_at   | -               | -2,866296344 | -2,621331989 | -0,24496435 |  |
| 1566481_at   | -               | -2,866296344 | -2,621331989 | -0,24496435 |  |
| 1569929_at   | -               | -2,866296344 | -2,621331989 | -0,24496435 |  |
| 212865_s_at  | COL14A1         | -2,866296344 | -2,621331989 | -0,24496435 |  |
| 215686_x_at  | TFAP2B          | -2,866296344 | -2,621331989 | -0,24496435 |  |
| 217246_s_at  | DIAPH2          | -2,866296344 | -2,621331989 | -0,24496435 |  |
| 228426_at    | CLEC2D          | -2,866296344 | -2,621331989 | -0,24496435 |  |
| 233659_at    | -               | -2,866296344 | -2,621331989 | -0,24496435 |  |
| 234679_at    | KRTAP9-3        | -2,866296344 | -2,621331989 | -0,24496435 |  |
| 237213_at    | -               | -2,866296344 | -2,621331989 | -0,24496435 |  |
| 237973_at    | -               | -2,866296344 | -2,621331989 | -0,24496435 |  |
| 237998_at    | -               | -2,866296344 | -2,621331989 | -0,24496435 |  |
| 238358_x_at  | -               | -2,866296344 | -2,621331989 | -0,24496435 |  |
| 240019_at    | -               | -2,866296344 | -2,621331989 | -0,24496435 |  |
| 240122_at    | DIRAS2          | -2,866296344 | -2,621331989 | -0,24496435 |  |
| 241047_at    | LINC00340       | -2,866296344 | -2,621331989 | -0,24496435 |  |
| 243193_at    | -               | -2,866296344 | -2,621331989 | -0,24496435 |  |

|              |                   |              |              |             |  |
|--------------|-------------------|--------------|--------------|-------------|--|
| 202409_at    | IGF2 /// INS-IGF2 | 1,352503698  | 1,59747851   | -0,24497481 |  |
| 205842_s_at  | JAK2              | 1,153678675  | 1,398700978  | -0,2450223  |  |
| 1555310_a_at | PAK6              | -0,022466681 | 0,222599095  | -0,24506578 |  |
| 235537_at    | OCIAD1            | -0,022466681 | 0,222599095  | -0,24506578 |  |
| 209435_s_at  | ARHGEF2           | 2,525769574  | 2,770953871  | -0,2451843  |  |
| 236337_at    | SYCP2L            | 2,16388051   | 2,409170778  | -0,24529027 |  |
| 229629_at    | -                 | 0,30867765   | 0,553993624  | -0,24531597 |  |
| 223591_at    | RNF135            | 1,079110292  | 1,324440845  | -0,24533055 |  |
| 1566824_at   | -                 | -0,706943342 | -0,461594427 | -0,24534892 |  |
| 210344_at    | OSBPL7            | -0,706943342 | -0,461594427 | -0,24534892 |  |
| 217273_at    | PRAMEF10          | -0,706943342 | -0,461594427 | -0,24534892 |  |
| 230764_at    | -                 | -0,706943342 | -0,461594427 | -0,24534892 |  |
| 237757_at    | -                 | -0,706943342 | -0,461594427 | -0,24534892 |  |
| 242615_at    | CCDC37            | -0,706943342 | -0,461594427 | -0,24534892 |  |
| 229353_s_at  | NUCKS1            | 4,240398611  | 4,485783875  | -0,24538526 |  |
| 206940_s_at  | POU4F1            | 1,820612054  | 2,066015817  | -0,24540376 |  |
| 222544_s_at  | WHSC1L1           | 2,127340679  | 2,372786857  | -0,24544618 |  |
| 228654_at    | SPIN4             | 6,04491      | 6,290373396  | -0,2454634  |  |
| 225814_at    | XRN1              | 2,380152406  | 2,625627364  | -0,24547496 |  |
| 212676_at    | NF1               | 2,014487247  | 2,259997914  | -0,24551067 |  |
| 211364_at    | MTAP              | -0,136301282 | 0,109221392  | -0,24552267 |  |
| 220469_at    | COPE              | -0,136301282 | 0,109221392  | -0,24552267 |  |
| 232686_at    | SIGLEC17P         | -0,136301282 | 0,109221392  | -0,24552267 |  |
| 202155_s_at  | NUP214            | 1,774096855  | 2,019703483  | -0,24560663 |  |
| 224795_x_at  | IGK@ /// IGKC /// | 1,774096855  | 2,019703483  | -0,24560663 |  |
| 217656_at    | -                 | 0,541261317  | 0,786897721  | -0,2456364  |  |
| 1563137_at   | MGAT5B            | -1,196375121 | -0,950686014 | -0,24568911 |  |
| 1563709_at   | LOC100127955 /    | -1,196375121 | -0,950686014 | -0,24568911 |  |
| 201187_s_at  | ITPR3             | -1,196375121 | -0,950686014 | -0,24568911 |  |
| 209802_at    | PHLDA2            | -1,196375121 | -0,950686014 | -0,24568911 |  |
| 214287_s_at  | CDK13             | -1,196375121 | -0,950686014 | -0,24568911 |  |
| 214605_x_at  | GPR1              | -1,196375121 | -0,950686014 | -0,24568911 |  |
| 215863_at    | TFR2              | -1,196375121 | -0,950686014 | -0,24568911 |  |
| 217030_at    | -                 | -1,196375121 | -0,950686014 | -0,24568911 |  |
| 218876_at    | TPPP3             | -1,196375121 | -0,950686014 | -0,24568911 |  |
| 219315_s_at  | TMEM204           | -1,196375121 | -0,950686014 | -0,24568911 |  |
| 229619_at    | FOLR2             | -1,196375121 | -0,950686014 | -0,24568911 |  |
| 231236_at    | ZFP57             | -1,196375121 | -0,950686014 | -0,24568911 |  |
| 231345_s_at  | DHRS12            | -1,196375121 | -0,950686014 | -0,24568911 |  |
| 231905_at    | C20orf96          | -1,196375121 | -0,950686014 | -0,24568911 |  |
| 233566_at    | -                 | -1,196375121 | -0,950686014 | -0,24568911 |  |
| 242671_at    | -                 | -1,196375121 | -0,950686014 | -0,24568911 |  |
| 243194_at    | ZNF551            | -1,196375121 | -0,950686014 | -0,24568911 |  |
| 209147_s_at  | PPAP2A            | 3,456984333  | 3,702749166  | -0,24576483 |  |
| 202217_at    | C21orf33          | 5,50422093   | 5,75014201   | -0,24592108 |  |
| 214903_at    | SYT2              | 0,171847695  | 0,417770464  | -0,24592277 |  |
| 242310_at    | -                 | 0,171847695  | 0,417770464  | -0,24592277 |  |
| 220275_at    | CUZD1             | 1,446464021  | 1,692388143  | -0,24592412 |  |
| 217789_at    | SNX6              | 3,609598452  | 3,855584709  | -0,24598626 |  |
| 235512_at    | CDKL1             | 1,261018186  | 1,507116528  | -0,24609834 |  |
| 228889_at    | ARHGAP5-AS1       | 0,425644434  | 0,67181667   | -0,24617224 |  |
| 1552749_a_at | KLC3              | 1,64218396   | 1,888402606  | -0,24621865 |  |
| 212821_at    | PLEKHG3           | -0,325749314 | -0,079522948 | -0,24622637 |  |
| 209078_s_at  | TXN2              | 3,970249334  | 4,216563145  | -0,24631381 |  |
| 235064_s_at  | C20orf196         | 1,04816921   | 1,294497133  | -0,24632792 |  |
| 213639_s_at  | ZNF500            | 0,859074518  | 1,105412836  | -0,24633832 |  |

|              |                  |              |              |             |  |
|--------------|------------------|--------------|--------------|-------------|--|
| 240452_at    | GSPT1            | 1,481627361  | 1,728030156  | -0,2464028  |  |
| 1552518_s_at | MTBP             | -0,467091869 | -0,220592223 | -0,24649965 |  |
| 242863_at    | -                | -0,467091869 | -0,220592223 | -0,24649965 |  |
| 211354_s_at  | LEPR             | 1,462198073  | 1,708698295  | -0,24650022 |  |
| 202181_at    | KIAA0247         | 2,857110344  | 3,103784293  | -0,24667395 |  |
| 1557712_x_at | -                | 0,57058931   | 0,817300337  | -0,24671103 |  |
| 206874_s_at  | SLK              | 3,107750584  | 3,354479478  | -0,24672889 |  |
| 212699_at    | SCAMP5           | 0,767063567  | 1,013870809  | -0,24680724 |  |
| 229115_at    | DYNC1H1          | 0,767063567  | 1,013870809  | -0,24680724 |  |
| 226689_at    | CISD2            | 2,967339888  | 3,21415095   | -0,24681106 |  |
| 213772_s_at  | GGA2             | 2,094906514  | 2,341749893  | -0,24684338 |  |
| 214953_s_at  | APP              | 4,416786695  | 4,66363827   | -0,24685158 |  |
| 203879_at    | PIK3CD           | 1,233777334  | 1,480766833  | -0,2469895  |  |
| 204784_s_at  | MLF1             | 3,969561444  | 4,216563145  | -0,2470017  |  |
| 205453_at    | HOXB2            | -0,926850548 | -0,679763839 | -0,24708671 |  |
| 220378_at    | TCP11            | -0,926850548 | -0,679763839 | -0,24708671 |  |
| 226313_at    | C10orf35         | -0,926850548 | -0,679763839 | -0,24708671 |  |
| 230663_at    | -                | -0,926850548 | -0,679763839 | -0,24708671 |  |
| 231125_at    | -                | -0,926850548 | -0,679763839 | -0,24708671 |  |
| 1553117_a_at | STK38            | 2,710020346  | 2,957221307  | -0,24720096 |  |
| 1558581_at   | TEX22            | -0,089689931 | 0,157549243  | -0,24723917 |  |
| 1569510_at   | -                | -0,089689931 | 0,157549243  | -0,24723917 |  |
| 219277_s_at  | OGDHL            | -0,089689931 | 0,157549243  | -0,24723917 |  |
| 221868_at    | PAIP2B           | -0,089689931 | 0,157549243  | -0,24723917 |  |
| 225800_at    | JAZF1            | -0,089689931 | 0,157549243  | -0,24723917 |  |
| 210992_x_at  | FCGR2C           | 2,232003119  | 2,479296438  | -0,24729332 |  |
| 217559_at    | RPL10L           | 0,209623097  | 0,456918297  | -0,2472952  |  |
| 230625_s_at  | TSPAN12          | 0,209623097  | 0,456918297  | -0,2472952  |  |
| 232190_x_at  | LOC100133445 /   | 0,457392764  | 0,704715219  | -0,24732245 |  |
| 216105_x_at  | PPP2R4           | 1,163336153  | 1,410714371  | -0,24737822 |  |
| 1558249_s_at | STX16            | 1,296557217  | 1,543943227  | -0,24738601 |  |
| 210135_s_at  | SHOX2            | 1,296557217  | 1,543943227  | -0,24738601 |  |
| 212796_s_at  | TBC1D2B          | 1,296557217  | 1,543943227  | -0,24738601 |  |
| 217724_at    | SERBP1           | 6,39128942   | 6,638815989  | -0,24752657 |  |
| 212078_s_at  | MLL              | 1,251994932  | 1,499637023  | -0,24764209 |  |
| 208580_x_at  | HIST1H4A /// HIS | 2,520143371  | 2,767843855  | -0,24770048 |  |
| 209035_at    | MDK              | 2,510717331  | 2,758473378  | -0,24775605 |  |
| 204625_s_at  | ITGB3            | 0,376672223  | 0,624460759  | -0,24778854 |  |
| 217949_s_at  | VKORC1           | 3,495722611  | 3,743690278  | -0,24796767 |  |
| 238988_at    | -                | 1,631786706  | 1,879785595  | -0,24799889 |  |
| 204233_s_at  | CHKA             | 2,038300149  | 2,286318242  | -0,24801809 |  |
| 212209_at    | MED13L           | 1,805273023  | 2,053299695  | -0,24802667 |  |
| 1553706_at   | HTRA4            | -2,823166348 | -2,575129729 | -0,24803662 |  |
| 1558654_at   | PPM1H            | -2,823166348 | -2,575129729 | -0,24803662 |  |
| 203887_s_at  | THBD             | -2,823166348 | -2,575129729 | -0,24803662 |  |
| 205578_at    | ROR2             | -2,823166348 | -2,575129729 | -0,24803662 |  |
| 213032_at    | NFIB             | -2,823166348 | -2,575129729 | -0,24803662 |  |
| 230081_at    | PLCXD3           | -2,823166348 | -2,575129729 | -0,24803662 |  |
| 231376_at    | UPP2             | -2,823166348 | -2,575129729 | -0,24803662 |  |
| 231675_s_at  | ADH4             | -2,823166348 | -2,575129729 | -0,24803662 |  |
| 236414_at    | -                | -2,823166348 | -2,575129729 | -0,24803662 |  |
| 238297_at    | -                | -2,823166348 | -2,575129729 | -0,24803662 |  |
| 243700_x_at  | FAM47A           | -2,823166348 | -2,575129729 | -0,24803662 |  |
| 244270_at    | -                | -2,823166348 | -2,575129729 | -0,24803662 |  |
| 204042_at    | WASF3            | 3,276317033  | 3,524430539  | -0,24811351 |  |
| 211576_s_at  | SLC19A1          | 3,647078281  | 3,895315489  | -0,24823721 |  |

|              |           |              |              |             |  |
|--------------|-----------|--------------|--------------|-------------|--|
| 1552769_at   | ZNF625    | 1,269985355  | 1,518263577  | -0,24827822 |  |
| 234788_x_at  | -         | 1,269985355  | 1,518263577  | -0,24827822 |  |
| 211622_s_at  | ARF3      | 1,917954284  | 2,166264721  | -0,24831044 |  |
| 215071_s_at  | HIST1H2AC | 6,234710039  | 6,483022305  | -0,24831227 |  |
| 224995_at    | SPIRE1    | 1,542099044  | 1,790660532  | -0,24856149 |  |
| 240237_at    | -         | 1,542099044  | 1,790660532  | -0,24856149 |  |
| 203309_s_at  | HPS1      | 0,246434561  | 0,495031851  | -0,24859729 |  |
| 228836_at    | SLC25A35  | 0,246434561  | 0,495031851  | -0,24859729 |  |
| 229319_at    | -         | 0,246434561  | 0,495031851  | -0,24859729 |  |
| 230017_at    | -         | 0,246434561  | 0,495031851  | -0,24859729 |  |
| 236033_at    | ASB12     | 0,246434561  | 0,495031851  | -0,24859729 |  |
| 242311_x_at  | -         | 0,246434561  | 0,495031851  | -0,24859729 |  |
| 205163_at    | MYLPF     | 0,627515113  | 0,876248481  | -0,24873337 |  |
| 213815_x_at  | CACTIN    | 0,928678725  | 1,177496821  | -0,2488181  |  |
| 235041_at    | GOSR2     | 0,928678725  | 1,177496821  | -0,2488181  |  |
| 36566_at     | CTNS      | 1,390002893  | 1,638920873  | -0,24891798 |  |
| 223871_x_at  | ING5      | 1,485482016  | 1,73441697   | -0,24893495 |  |
| 212738_at    | ARHGAP19  | 3,617524043  | 3,866529339  | -0,2490053  |  |
| 227934_at    | KPNA5     | 1,783520648  | 2,032717854  | -0,24919721 |  |
| 218177_at    | CHMP1B    | 0,555999837  | 0,805216064  | -0,24921623 |  |
| 1554050_at   | SMPDL3B   | 0,518867317  | 0,768343791  | -0,24947647 |  |
| 1568986_x_at | PIGT      | 0,518867317  | 0,768343791  | -0,24947647 |  |
| 201900_s_at  | AKR1A1    | 3,643632572  | 3,893176339  | -0,24954377 |  |
| 204545_at    | PEX6      | 0,103263601  | 0,352836757  | -0,24957316 |  |
| 217665_at    | ZNF813    | 0,103263601  | 0,352836757  | -0,24957316 |  |
| 223056_s_at  | XPO5      | 3,504297212  | 3,753943043  | -0,24964583 |  |
| 222807_at    | C11orf30  | 2,218170265  | 2,467842989  | -0,24967272 |  |
| 205532_s_at  | CDH6      | -3,287237186 | -3,037500868 | -0,24973632 |  |
| 219949_at    | LRRC2     | -3,287237186 | -3,037500868 | -0,24973632 |  |
| 231424_at    | SLC5A12   | -3,287237186 | -3,037500868 | -0,24973632 |  |
| 232578_at    | CLDN18    | -3,287237186 | -3,037500868 | -0,24973632 |  |
| 239548_at    | NEGR1     | -3,287237186 | -3,037500868 | -0,24973632 |  |
| 240811_at    | -         | -3,287237186 | -3,037500868 | -0,24973632 |  |
| 243142_at    | FGD6      | -3,287237186 | -3,037500868 | -0,24973632 |  |
| 243734_x_at  | -         | -3,287237186 | -3,037500868 | -0,24973632 |  |
| 228774_at    | CEP78     | 1,976645579  | 2,226407528  | -0,24976195 |  |
| 238030_at    | ZNF268    | 1,442503549  | 1,692388143  | -0,24988459 |  |
| 217901_at    | DSG2      | 3,547344317  | 3,797294336  | -0,24995002 |  |
| 211060_x_at  | GPAA1     | 3,276317033  | 3,526272152  | -0,24995512 |  |
| 206850_at    | RASL10A   | 0,44160593   | 0,691645685  | -0,25003976 |  |
| 228466_at    | GABPB2    | 0,44160593   | 0,691645685  | -0,25003976 |  |
| 239516_at    | -         | 0,44160593   | 0,691645685  | -0,25003976 |  |
| 208270_s_at  | RNPEP     | 1,58584542   | 1,835911187  | -0,25006577 |  |
| 217650_x_at  | ST3GAL2   | 3,333038605  | 3,583111417  | -0,25007281 |  |
| 229336_at    | ST3GAL2   | 2,392522438  | 2,64270545   | -0,25018301 |  |
| 206728_at    | ECE2      | -0,00073712  | 0,249604176  | -0,2503413  |  |
| 208086_s_at  | DMD       | -0,00073712  | 0,249604176  | -0,2503413  |  |
| 229080_at    | EMID2     | -0,00073712  | 0,249604176  | -0,2503413  |  |
| 234208_at    | -         | -0,00073712  | 0,249604176  | -0,2503413  |  |
| 217586_x_at  | -         | 1,191926657  | 1,442269454  | -0,2503428  |  |
| 243768_at    | -         | 2,919702154  | 3,170070041  | -0,25036789 |  |
| 221725_at    | WASF2     | 2,600539826  | 2,851017268  | -0,25047744 |  |
| 1554983_at   | LINC00317 | -1,470833215 | -1,220210588 | -0,25062263 |  |
| 1556496_a_at | -         | -1,470833215 | -1,220210588 | -0,25062263 |  |
| 1560844_at   | -         | -1,470833215 | -1,220210588 | -0,25062263 |  |
| 1561923_a_at | SF3B14    | -1,470833215 | -1,220210588 | -0,25062263 |  |

|              |                  |              |              |             |  |
|--------------|------------------|--------------|--------------|-------------|--|
| 211726_s_at  | FMO2             | -1,470833215 | -1,220210588 | -0,25062263 |  |
| 216110_x_at  | -                | -1,470833215 | -1,220210588 | -0,25062263 |  |
| 220347_at    | SMG6             | -1,470833215 | -1,220210588 | -0,25062263 |  |
| 224329_s_at  | CNFN             | -1,470833215 | -1,220210588 | -0,25062263 |  |
| 228609_at    | MIR1302-10 /// M | -1,470833215 | -1,220210588 | -0,25062263 |  |
| 229527_s_at  | OSBPL11          | -1,470833215 | -1,220210588 | -0,25062263 |  |
| 232213_at    | PELI1            | -1,470833215 | -1,220210588 | -0,25062263 |  |
| 232920_at    | CCDC157          | -1,470833215 | -1,220210588 | -0,25062263 |  |
| 240185_at    | LOC100147773     | -1,470833215 | -1,220210588 | -0,25062263 |  |
| 244575_at    | POLA2            | -1,470833215 | -1,220210588 | -0,25062263 |  |
| 244703_x_at  | IPO9             | -1,470833215 | -1,220210588 | -0,25062263 |  |
| 226310_at    | RICTOR           | 1,789769151  | 2,040470494  | -0,25070134 |  |
| 1556820_a_at | DLEU2            | -0,741668563 | -0,490927335 | -0,25074123 |  |
| 204790_at    | SMAD7            | -0,741668563 | -0,490927335 | -0,25074123 |  |
| 208378_x_at  | FGF5             | -0,741668563 | -0,490927335 | -0,25074123 |  |
| 228108_at    | PPM1L            | -0,741668563 | -0,490927335 | -0,25074123 |  |
| 229160_at    | MUM1L1           | -0,741668563 | -0,490927335 | -0,25074123 |  |
| 233165_at    | NCKIPSD          | -0,741668563 | -0,490927335 | -0,25074123 |  |
| 239602_at    | LOC100652972     | -0,741668563 | -0,490927335 | -0,25074123 |  |
| 242219_at    | -                | -0,741668563 | -0,490927335 | -0,25074123 |  |
| 1562232_at   | -                | -0,352951799 | -0,102100538 | -0,25085126 |  |
| 214122_at    | PDLIM7           | -0,352951799 | -0,102100538 | -0,25085126 |  |
| 227326_at    | MXRA7            | -0,352951799 | -0,102100538 | -0,25085126 |  |
| 232808_at    | -                | -0,352951799 | -0,102100538 | -0,25085126 |  |
| 232952_at    | -                | -0,352951799 | -0,102100538 | -0,25085126 |  |
| 227066_at    | MOB3C            | 1,021868205  | 1,272721751  | -0,25085355 |  |
| 202102_s_at  | BRD4             | 3,933331467  | 4,18426834   | -0,25093687 |  |
| 235259_at    | PACRGL           | 0,317354302  | 0,568365095  | -0,25101079 |  |
| 235998_at    | RHPN1            | 0,317354302  | 0,568365095  | -0,25101079 |  |
| 227348_at    | PARS2            | 1,614289682  | 1,865308541  | -0,25101886 |  |
| 208723_at    | USP11            | 4,729117325  | 4,980136916  | -0,25101959 |  |
| 238537_at    | CA8              | 0,995078803  | 1,246149888  | -0,25107109 |  |
| 233847_x_at  | -                | -3,598927963 | -3,347710726 | -0,25121724 |  |
| 201149_s_at  | TIMP3            | 3,231115193  | 3,482360311  | -0,25124512 |  |
| 222831_at    | SAP30L           | -0,655928373 | -0,404530677 | -0,2513977  |  |
| 235614_at    | TMEM151A         | -0,669963175 | -0,418525812 | -0,25143736 |  |
| 225697_at    | CDK12            | 1,560488174  | 1,811954245  | -0,25146607 |  |
| 203940_s_at  | VASH1            | 1,814495998  | 2,066015817  | -0,25151982 |  |
| 218294_s_at  | NUP50            | 3,127619759  | 3,379145507  | -0,25152575 |  |
| 202218_s_at  | FADS2            | 2,433006244  | 2,684536601  | -0,25153036 |  |
| 208612_at    | PDIA3            | 5,289517436  | 5,541075604  | -0,25155817 |  |
| 212432_at    | GRPEL1           | 3,952952896  | 4,204537151  | -0,25158425 |  |
| 208850_s_at  | THY1             | -0,57445847  | -0,322870281 | -0,25158819 |  |
| 215989_at    | CBX2             | -0,57445847  | -0,322870281 | -0,25158819 |  |
| 229765_at    | ZNF207           | -0,57445847  | -0,322870281 | -0,25158819 |  |
| 233386_at    | -                | -0,57445847  | -0,322870281 | -0,25158819 |  |
| 236318_x_at  | FBLL1            | -0,57445847  | -0,322870281 | -0,25158819 |  |
| 241617_x_at  | -                | -0,57445847  | -0,322870281 | -0,25158819 |  |
| 1555351_s_at | PPHLN1           | 2,114952142  | 2,366632651  | -0,25168051 |  |
| 210866_s_at  | CNOT4            | -0,172274514 | 0,079428135  | -0,25170265 |  |
| 230089_s_at  | C19orf6          | -0,172274514 | 0,079428135  | -0,25170265 |  |
| 201602_s_at  | PPP1R12A         | 2,559073676  | 2,810785576  | -0,25171119 |  |
| 206687_s_at  | PTPN6            | 0,228146222  | 0,479907041  | -0,25176082 |  |
| 225602_at    | GLIPR2 /// LOC1  | 0,228146222  | 0,479907041  | -0,25176082 |  |
| 231946_at    | ZFHX2            | 0,228146222  | 0,479907041  | -0,25176082 |  |
| 218715_at    | UTP6             | 4,28697245   | 4,538745139  | -0,25177269 |  |

|              |              |              |              |             |  |
|--------------|--------------|--------------|--------------|-------------|--|
| 225412_at    | TMEM87B      | 1,292162421  | 1,543943227  | -0,25178081 |  |
| 213205_s_at  | RAD54L2      | 1,523472489  | 1,775255987  | -0,2517835  |  |
| 236346_at    | -            | 1,706348269  | 1,958277216  | -0,25192895 |  |
| 201331_s_at  | STAT6        | 1,575032557  | 1,826973888  | -0,25194133 |  |
| 209893_s_at  | FUT4         | 0,641402394  | 0,893473268  | -0,25207087 |  |
| 226587_at    | LOC100506965 | 0,503742507  | 0,755840599  | -0,25209809 |  |
| 210137_s_at  | DCTD         | 3,130084275  | 3,382199319  | -0,25211504 |  |
| 214040_s_at  | GSN          | 0,351548291  | 0,603679647  | -0,25213136 |  |
| 219879_s_at  | C17orf53     | 0,351548291  | 0,603679647  | -0,25213136 |  |
| 222755_s_at  | CHD7         | 0,351548291  | 0,603679647  | -0,25213136 |  |
| 227722_at    | RPS23        | 0,351548291  | 0,603679647  | -0,25213136 |  |
| 206649_s_at  | TFE3         | 1,247462054  | 1,499637023  | -0,25217497 |  |
| 229559_at    | PPM1N        | 1,063722698  | 1,315948728  | -0,25222603 |  |
| 212625_at    | STX10        | 2,390468117  | 2,64270545   | -0,25223733 |  |
| 203494_s_at  | CEP57        | 3,203298287  | 3,455550298  | -0,25225201 |  |
| 215051_x_at  | AIF1         | 2,802535172  | 3,05486507   | -0,2523299  |  |
| 1556959_at   | ANHX         | 0,735041319  | 0,987376598  | -0,25233528 |  |
| 204621_s_at  | NR4A2        | 0,735041319  | 0,987376598  | -0,25233528 |  |
| 227357_at    | TAB3         | 3,479385765  | 3,731768909  | -0,25238314 |  |
| 231843_at    | DDX55        | 2,678376417  | 2,93104672   | -0,2526703  |  |
| 208099_x_at  | TTLL5        | -0,299034815 | -0,046302147 | -0,25273267 |  |
| 226697_at    | FAM114A1     | -0,299034815 | -0,046302147 | -0,25273267 |  |
| 214096_s_at  | SHMT2        | 4,249494456  | 4,502251705  | -0,25275725 |  |
| 229116_at    | CNKSR2       | 1,481627361  | 1,73441697   | -0,25278961 |  |
| 1553710_at   | FAM218A      | -2,756478458 | -2,503677622 | -0,25280084 |  |
| 1554846_at   | CCDC158      | -2,756478458 | -2,503677622 | -0,25280084 |  |
| 1554947_at   | ACAT1        | -2,756478458 | -2,503677622 | -0,25280084 |  |
| 1560692_at   | LOC285878    | -2,756478458 | -2,503677622 | -0,25280084 |  |
| 1562023_at   | -            | -2,756478458 | -2,503677622 | -0,25280084 |  |
| 1563693_at   | -            | -2,756478458 | -2,503677622 | -0,25280084 |  |
| 1563884_at   | -            | -2,756478458 | -2,503677622 | -0,25280084 |  |
| 1566959_at   | -            | -2,756478458 | -2,503677622 | -0,25280084 |  |
| 1569638_at   | SOX5         | -2,756478458 | -2,503677622 | -0,25280084 |  |
| 1569835_at   | -            | -2,756478458 | -2,503677622 | -0,25280084 |  |
| 1570394_at   | XRN1         | -2,756478458 | -2,503677622 | -0,25280084 |  |
| 211478_s_at  | DPP4         | -2,756478458 | -2,503677622 | -0,25280084 |  |
| 216742_at    | -            | -2,756478458 | -2,503677622 | -0,25280084 |  |
| 219106_s_at  | KBTBD10      | -2,756478458 | -2,503677622 | -0,25280084 |  |
| 224230_at    | IL36B        | -2,756478458 | -2,503677622 | -0,25280084 |  |
| 230356_at    | -            | -2,756478458 | -2,503677622 | -0,25280084 |  |
| 231618_s_at  | SUN3         | -2,756478458 | -2,503677622 | -0,25280084 |  |
| 232188_at    | AKAP13       | -2,756478458 | -2,503677622 | -0,25280084 |  |
| 233087_at    | FBXL17       | -2,756478458 | -2,503677622 | -0,25280084 |  |
| 233608_at    | -            | -2,756478458 | -2,503677622 | -0,25280084 |  |
| 234155_at    | -            | -2,756478458 | -2,503677622 | -0,25280084 |  |
| 235116_at    | TRAF1        | -2,756478458 | -2,503677622 | -0,25280084 |  |
| 237988_at    | EIF1B        | -2,756478458 | -2,503677622 | -0,25280084 |  |
| 242158_at    | PAPOLB       | -2,756478458 | -2,503677622 | -0,25280084 |  |
| 219967_at    | MRM1         | 1,326951551  | 1,579853228  | -0,25290168 |  |
| 208796_s_at  | CCNG1        | 5,256060676  | 5,509072081  | -0,25301141 |  |
| 1553444_a_at | C1orf127     | 0,533835206  | 0,786897721  | -0,25306252 |  |
| 227510_x_at  | MALAT1       | 0,533835206  | 0,786897721  | -0,25306252 |  |
| 228674_s_at  | EML4         | 0,533835206  | 0,786897721  | -0,25306252 |  |
| 238509_at    | CUL1         | 0,533835206  | 0,786897721  | -0,25306252 |  |
| 214092_x_at  | SUGP2        | 3,002736078  | 3,255815291  | -0,25307921 |  |
| 1567013_at   | NFE2L2       | 0,083054335  | 0,336136178  | -0,25308184 |  |

|              |              |              |              |             |  |
|--------------|--------------|--------------|--------------|-------------|--|
| 205660_at    | OASL         | 0,083054335  | 0,336136178  | -0,25308184 |  |
| 207504_at    | CA7          | 0,083054335  | 0,336136178  | -0,25308184 |  |
| 228862_at    | TSNARE1      | 0,083054335  | 0,336136178  | -0,25308184 |  |
| 231178_at    | SPATA4       | 0,083054335  | 0,336136178  | -0,25308184 |  |
| 1558329_at   | TONSL        | 0,760715727  | 1,013870809  | -0,25315508 |  |
| 228105_at    | -            | 0,760715727  | 1,013870809  | -0,25315508 |  |
| 1558080_s_at | DNAJC3       | 0,384950573  | 0,638150376  | -0,2531998  |  |
| 206114_at    | EPHA4        | 0,384950573  | 0,638150376  | -0,2531998  |  |
| 216822_x_at  | -            | 0,384950573  | 0,638150376  | -0,2531998  |  |
| 244730_x_at  | LOC100129195 | 0,384950573  | 0,638150376  | -0,2531998  |  |
| 212521_s_at  | PDE8A        | 1,567778694  | 1,820984782  | -0,25320609 |  |
| 203975_s_at  | CHAF1A       | 2,082235068  | 2,335461563  | -0,2532265  |  |
| 205349_at    | GNA15        | 1,496984567  | 1,750261389  | -0,25327682 |  |
| 205631_at    | KIAA0586     | 1,889144008  | 2,14244844   | -0,25330443 |  |
| 201853_s_at  | CDC25B       | 2,817903185  | 3,071356473  | -0,25345329 |  |
| 223413_s_at  | LYAR         | 3,849821959  | 4,103307085  | -0,25348513 |  |
| 220326_s_at  | ARHGEF40     | 1,104397092  | 1,3579181    | -0,25352101 |  |
| 239607_at    | GPR156       | 1,104397092  | 1,3579181    | -0,25352101 |  |
| 201917_s_at  | SLC25A36     | 2,392522438  | 2,646096941  | -0,2535745  |  |
| 1556007_s_at | CSNK1A1      | 1,758252436  | 2,011838132  | -0,2535857  |  |
| 209518_at    | SMARCD1      | 1,954567604  | 2,208167653  | -0,25360005 |  |
| 225111_s_at  | NAPB         | 2,043538949  | 2,297144887  | -0,25360594 |  |
| 202108_at    | PEPD         | 3,738747209  | 3,992437318  | -0,25369011 |  |
| 1557439_at   | -            | -3,250025915 | -2,996335703 | -0,25369021 |  |
| 1559035_a_at | -            | -3,250025915 | -2,996335703 | -0,25369021 |  |
| 1562249_at   | EPHA1-AS1    | -3,250025915 | -2,996335703 | -0,25369021 |  |
| 1570585_at   | MPZL3        | -3,250025915 | -2,996335703 | -0,25369021 |  |
| 221144_at    | -            | -3,250025915 | -2,996335703 | -0,25369021 |  |
| 229273_at    | SALL1        | -3,250025915 | -2,996335703 | -0,25369021 |  |
| 238384_x_at  | -            | -3,250025915 | -2,996335703 | -0,25369021 |  |
| 241470_x_at  | -            | -3,250025915 | -2,996335703 | -0,25369021 |  |
| 203390_s_at  | KIF3C        | 0,900083947  | 1,153866761  | -0,25378281 |  |
| 206906_at    | ICAM5        | 0,900083947  | 1,153866761  | -0,25378281 |  |
| 231517_at    | ZYG11A       | 0,900083947  | 1,153866761  | -0,25378281 |  |
| 232263_at    | SLC6A15      | 0,900083947  | 1,153866761  | -0,25378281 |  |
| 235314_at    | RPL32P3      | 0,695652136  | 0,949447784  | -0,25379565 |  |
| 202322_s_at  | GGPS1        | 3,381421359  | 3,635238397  | -0,25381704 |  |
| 204880_at    | MGMT         | 1,965648824  | 2,21959457   | -0,25394575 |  |
| 1557477_at   | -            | -1,518072576 | -1,264005341 | -0,25406724 |  |
| 1558021_at   | RABEPK       | -1,518072576 | -1,264005341 | -0,25406724 |  |
| 1562745_at   | -            | -1,518072576 | -1,264005341 | -0,25406724 |  |
| 1565892_at   | -            | -1,518072576 | -1,264005341 | -0,25406724 |  |
| 1566991_at   | ARID1B       | -1,518072576 | -1,264005341 | -0,25406724 |  |
| 218162_at    | OLFML3       | -1,518072576 | -1,264005341 | -0,25406724 |  |
| 220288_at    | MYO15A       | -1,518072576 | -1,264005341 | -0,25406724 |  |
| 226632_at    | CYGB         | -1,518072576 | -1,264005341 | -0,25406724 |  |
| 229703_at    | DLG1         | -1,518072576 | -1,264005341 | -0,25406724 |  |
| 230111_at    | -            | -1,518072576 | -1,264005341 | -0,25406724 |  |
| 232442_at    | BCAR1        | -1,518072576 | -1,264005341 | -0,25406724 |  |
| 232594_at    | HSBP1L1      | -1,518072576 | -1,264005341 | -0,25406724 |  |
| 236285_at    | KLHDC7B      | -1,518072576 | -1,264005341 | -0,25406724 |  |
| 237761_at    | -            | -1,518072576 | -1,264005341 | -0,25406724 |  |
| 240628_at    | -            | -1,518072576 | -1,264005341 | -0,25406724 |  |
| 241854_at    | DNASE1       | -1,518072576 | -1,264005341 | -0,25406724 |  |
| 243035_at    | -            | -1,518072576 | -1,264005341 | -0,25406724 |  |
| 244646_at    | -            | -1,518072576 | -1,264005341 | -0,25406724 |  |



|              |                 |              |              |             |  |
|--------------|-----------------|--------------|--------------|-------------|--|
| 221533_at    | FAM162A         | -0,512251684 | -0,258114234 | -0,25413745 |  |
| 228984_at    | CARNS1          | -0,512251684 | -0,258114234 | -0,25413745 |  |
| 230142_s_at  | CIRBP           | -0,512251684 | -0,258114234 | -0,25413745 |  |
| 234446_at    | -               | -0,512251684 | -0,258114234 | -0,25413745 |  |
| 235211_at    | -               | -0,512251684 | -0,258114234 | -0,25413745 |  |
| 235370_at    | KREMEN1         | -0,512251684 | -0,258114234 | -0,25413745 |  |
| 236763_at    | -               | -0,512251684 | -0,258114234 | -0,25413745 |  |
| 220488_s_at  | BCAS3           | 0,417596971  | 0,67181667   | -0,2542197  |  |
| 224979_s_at  | USP36           | 0,417596971  | 0,67181667   | -0,2542197  |  |
| 229785_at    | KRIT1           | 0,417596971  | 0,67181667   | -0,2542197  |  |
| 238247_at    | LOC100506942    | -0,67289328  | -0,41858459  | -0,25430869 |  |
| 1553634_a_at | FLJ40852        | 0,123193849  | 0,377530647  | -0,2543368  |  |
| 1557799_at   | C11orf31        | 0,123193849  | 0,377530647  | -0,2543368  |  |
| 202931_x_at  | BIN1            | 0,123193849  | 0,377530647  | -0,2543368  |  |
| 228976_at    | ICOSLG          | 0,123193849  | 0,377530647  | -0,2543368  |  |
| 213940_s_at  | FNBP1           | 1,454352496  | 1,708698295  | -0,2543458  |  |
| 233380_s_at  | RUFY1           | 2,833109217  | 3,087661492  | -0,25455227 |  |
| 212770_at    | TLE3            | 1,542099044  | 1,796776588  | -0,25467754 |  |
| 226065_at    | PRICKLE1        | 2,86748657   | 3,122166354  | -0,25467978 |  |
| 1560686_at   | ITGAD           | -0,078265071 | 0,176436073  | -0,25470114 |  |
| 218110_at    | XAB2            | -0,078265071 | 0,176436073  | -0,25470114 |  |
| 228513_at    | TMEM219         | -0,078265071 | 0,176436073  | -0,25470114 |  |
| 231611_at    | -               | -0,078265071 | 0,176436073  | -0,25470114 |  |
| 212142_at    | MCM4            | 2,721505869  | 2,976208448  | -0,25470258 |  |
| 205723_at    | CNTFR           | 0,592200562  | 0,847075464  | -0,2548749  |  |
| 226105_at    | C1GALT1         | 0,592200562  | 0,847075464  | -0,2548749  |  |
| 241991_at    | -               | 0,592200562  | 0,847075464  | -0,2548749  |  |
| 208393_s_at  | RAD50           | 2,294858597  | 2,549796788  | -0,25493819 |  |
| 223150_s_at  | PTPN23          | 1,04816921   | 1,303116084  | -0,25494687 |  |
| 204312_x_at  | CREB1           | 1,394109935  | 1,64909809   | -0,25498815 |  |
| 214946_x_at  | FAM21A /// FAM2 | 2,640847372  | 2,895866687  | -0,25501932 |  |
| 221027_s_at  | PLA2G12A        | 2,41290634   | 2,667949403  | -0,25504306 |  |
| 223774_at    | SNHG12 /// SNO  | 2,107467633  | 2,362515214  | -0,25504758 |  |
| 216522_at    | OR2B6           | 1,187200746  | 1,442269454  | -0,25506871 |  |
| 205240_at    | GPSM2           | 0,334552598  | 0,589657387  | -0,25510479 |  |
| 234937_x_at  | ZFP28           | 0,334552598  | 0,589657387  | -0,25510479 |  |
| 226913_s_at  | SOX8            | 2,344516784  | 2,599625088  | -0,2551083  |  |
| 221736_at    | RALGAPB         | 3,219589925  | 3,474751011  | -0,25516109 |  |
| 205196_s_at  | AP1S1           | 2,8571110344 | 3,112391743  | -0,2552814  |  |
| 201670_s_at  | MARCKS          | 1,094335495  | 1,349621332  | -0,25528584 |  |
| 1552354_at   | C19orf26        | -0,986356909 | -0,730778808 | -0,2555781  |  |
| 1563204_at   | -               | -0,986356909 | -0,730778808 | -0,2555781  |  |
| 1568904_at   | -               | -0,986356909 | -0,730778808 | -0,2555781  |  |
| 206279_at    | PRKY            | -0,986356909 | -0,730778808 | -0,2555781  |  |
| 211687_x_at  | KIR3DL1         | -0,986356909 | -0,730778808 | -0,2555781  |  |
| 220082_at    | PPP1R14D        | -0,986356909 | -0,730778808 | -0,2555781  |  |
| 220623_s_at  | TSGA10          | -0,986356909 | -0,730778808 | -0,2555781  |  |
| 221313_at    | GPR52           | -0,986356909 | -0,730778808 | -0,2555781  |  |
| 222873_s_at  | EHMT1           | -0,986356909 | -0,730778808 | -0,2555781  |  |
| 223392_s_at  | TSHZ3           | -0,986356909 | -0,730778808 | -0,2555781  |  |
| 225946_at    | RASSF8          | -0,986356909 | -0,730778808 | -0,2555781  |  |
| 234683_at    | KRTAP4-6 /// LO | -0,986356909 | -0,730778808 | -0,2555781  |  |
| 235991_at    | CYB5RL          | -0,986356909 | -0,730778808 | -0,2555781  |  |
| 238442_at    | -               | -0,986356909 | -0,730778808 | -0,2555781  |  |
| 239569_at    | FLJ31485        | -0,986356909 | -0,730778808 | -0,2555781  |  |
| 240379_at    | PKP4            | -0,986356909 | -0,730778808 | -0,2555781  |  |

|              |                |              |              |             |  |
|--------------|----------------|--------------|--------------|-------------|--|
| 241785_at    | -              | -0,986356909 | -0,730778808 | -0,2555781  |  |
| 242543_at    | SH2D6          | -0,986356909 | -0,730778808 | -0,2555781  |  |
| 1553468_at   | HYDIN2         | -2,712026959 | -2,456406426 | -0,25562053 |  |
| 1555800_at   | ZNF385B        | -2,712026959 | -2,456406426 | -0,25562053 |  |
| 1556490_a_at | TMEM247        | -2,712026959 | -2,456406426 | -0,25562053 |  |
| 1556558_s_at | ENTPD3-AS1     | -2,712026959 | -2,456406426 | -0,25562053 |  |
| 1557861_at   | -              | -2,712026959 | -2,456406426 | -0,25562053 |  |
| 1558336_at   | -              | -2,712026959 | -2,456406426 | -0,25562053 |  |
| 1561106_at   | LINC00271      | -2,712026959 | -2,456406426 | -0,25562053 |  |
| 1566094_at   | -              | -2,712026959 | -2,456406426 | -0,25562053 |  |
| 1566644_at   | -              | -2,712026959 | -2,456406426 | -0,25562053 |  |
| 1570128_at   | DDX19A         | -2,712026959 | -2,456406426 | -0,25562053 |  |
| 1570482_at   | -              | -2,712026959 | -2,456406426 | -0,25562053 |  |
| 205709_s_at  | CDS1           | -2,712026959 | -2,456406426 | -0,25562053 |  |
| 216809_at    | CYLC1          | -2,712026959 | -2,456406426 | -0,25562053 |  |
| 219574_at    | 01.03.15       | -2,712026959 | -2,456406426 | -0,25562053 |  |
| 222564_at    | POGK           | -2,712026959 | -2,456406426 | -0,25562053 |  |
| 232953_at    | LINC00266-1    | -2,712026959 | -2,456406426 | -0,25562053 |  |
| 234765_at    | -              | -2,712026959 | -2,456406426 | -0,25562053 |  |
| 237114_at    | -              | -2,712026959 | -2,456406426 | -0,25562053 |  |
| 238205_at    | DCAF12L1       | -2,712026959 | -2,456406426 | -0,25562053 |  |
| 240899_at    | -              | -2,712026959 | -2,456406426 | -0,25562053 |  |
| 1563069_at   | -              | -0,196756757 | 0,059218869  | -0,25597563 |  |
| 214734_at    | EXPH5          | -0,196756757 | 0,059218869  | -0,25597563 |  |
| 231225_at    | -              | -0,196756757 | 0,059218869  | -0,25597563 |  |
| 244414_at    | -              | -0,196756757 | 0,059218869  | -0,25597563 |  |
| 210045_at    | IDH2           | -0,033456564 | 0,222599095  | -0,25605566 |  |
| 214326_x_at  | JUND           | -0,033456564 | 0,222599095  | -0,25605566 |  |
| 240727_s_at  | -              | -0,033456564 | 0,222599095  | -0,25605566 |  |
| 220748_s_at  | ZNF580         | 2,893830579  | 3,149904996  | -0,25607442 |  |
| 211581_x_at  | LST1           | 0,859074518  | 1,115234684  | -0,25616017 |  |
| 214532_x_at  | POU5F1B        | 1,224581536  | 1,480766833  | -0,2561853  |  |
| 1558142_at   | TNRC6B         | 1,666156729  | 1,922365006  | -0,25620828 |  |
| 233571_x_at  | PPDPF          | 3,301680869  | 3,558125564  | -0,25644469 |  |
| 202105_at    | IGBP1          | 3,996149072  | 4,252607423  | -0,25645835 |  |
| 221762_s_at  | PCIF1          | 0,911589958  | 1,16809119   | -0,25650123 |  |
| 209196_at    | WDR46          | 3,582860873  | 3,839380885  | -0,25652001 |  |
| 216705_s_at  | ADA            | 2,014487247  | 2,271023131  | -0,25653588 |  |
| 221750_at    | HMGCS1         | 3,290707863  | 3,547283438  | -0,25657557 |  |
| 238172_at    | -              | 0,20027154   | 0,456918297  | -0,25664676 |  |
| 223199_at    | MKNK2          | 2,109966786  | 2,366632651  | -0,25666586 |  |
| 204206_at    | MNT            | 2,580856819  | 2,837730973  | -0,25687415 |  |
| 203035_s_at  | PIAS3          | 1,40228911   | 1,659204017  | -0,25691491 |  |
| 215504_x_at  | -              | 2,084778276  | 2,341749893  | -0,25697162 |  |
| 225601_at    | HMGB3          | 1,493160564  | 1,750261389  | -0,25710082 |  |
| 1557055_s_at | LOC643837      | 2,536956583  | 2,794067719  | -0,25711114 |  |
| 222387_s_at  | VPS35          | 2,846658948  | 3,103784293  | -0,25712535 |  |
| 228555_at    | CAMK2D         | 0,934330293  | 1,191491281  | -0,25716099 |  |
| 202418_at    | YIF1A          | 3,846079118  | 4,103307085  | -0,25722797 |  |
| 227010_at    | -              | 1,261018186  | 1,518263577  | -0,25724539 |  |
| 221249_s_at  | FAM117A        | 3,926967479  | 4,18426834   | -0,25730086 |  |
| 201582_at    | SEC23B         | 1,795990708  | 2,053299695  | -0,25730899 |  |
| 201835_s_at  | PRKAB1         | 2,185368281  | 2,442710777  | -0,2573425  |  |
| 223119_s_at  | USP47          | 0,57782909   | 0,835239052  | -0,25740996 |  |
| 225239_at    | LOC100653017 / | 0,57782909   | 0,835239052  | -0,25740996 |  |
| 223023_at    | BET1L          | 1,659347917  | 1,916759838  | -0,25741192 |  |

|              |                  |              |              |             |  |
|--------------|------------------|--------------|--------------|-------------|--|
| 210890_x_at  | KIR2DL1 /// KIR2 | -0,148196756 | 0,109221392  | -0,25741815 |  |
| 231153_at    | C16orf86         | -0,148196756 | 0,109221392  | -0,25741815 |  |
| 208792_s_at  | CLU              | 0,822971223  | 1,080561626  | -0,2575904  |  |
| 210405_x_at  | TNFRSF10B        | 0,822971223  | 1,080561626  | -0,2575904  |  |
| 212666_at    | SMURF1           | 0,822971223  | 1,080561626  | -0,2575904  |  |
| 1556185_a_at | STEAP4           | -3,212234735 | -2,954576755 | -0,25765798 |  |
| 1557822_at   | LOC401134        | -3,212234735 | -2,954576755 | -0,25765798 |  |
| 1562902_at   | -                | -3,212234735 | -2,954576755 | -0,25765798 |  |
| 231070_at    | IYD              | -3,212234735 | -2,954576755 | -0,25765798 |  |
| 233620_at    | ARHGEF12         | -3,212234735 | -2,954576755 | -0,25765798 |  |
| 1552384_a_at | FAM71A           | -1,308181863 | -1,050406615 | -0,25777525 |  |
| 1552725_s_at | ADAMTS17         | -1,308181863 | -1,050406615 | -0,25777525 |  |
| 1553155_x_at | ATP6V0D2         | -1,308181863 | -1,050406615 | -0,25777525 |  |
| 1557782_s_at | C21orf49         | -1,308181863 | -1,050406615 | -0,25777525 |  |
| 1562222_at   | -                | -1,308181863 | -1,050406615 | -0,25777525 |  |
| 1570042_a_at | ADAM9            | -1,308181863 | -1,050406615 | -0,25777525 |  |
| 1570600_at   | -                | -1,308181863 | -1,050406615 | -0,25777525 |  |
| 206004_at    | TGM3             | -1,308181863 | -1,050406615 | -0,25777525 |  |
| 210343_s_at  | SLC22A6          | -1,308181863 | -1,050406615 | -0,25777525 |  |
| 215381_at    | MTOR             | -1,308181863 | -1,050406615 | -0,25777525 |  |
| 231631_at    | -                | -1,308181863 | -1,050406615 | -0,25777525 |  |
| 234657_at    | -                | -1,308181863 | -1,050406615 | -0,25777525 |  |
| 239290_at    | FRMPD4           | -1,308181863 | -1,050406615 | -0,25777525 |  |
| 239521_at    | MFI2-AS1         | -1,308181863 | -1,050406615 | -0,25777525 |  |
| 241081_at    | -                | -1,308181863 | -1,050406615 | -0,25777525 |  |
| 244674_at    | -                | -1,308181863 | -1,050406615 | -0,25777525 |  |
| 211137_s_at  | ATP2C1           | 2,600539826  | 2,858346012  | -0,25780619 |  |
| 213553_x_at  | APOC1            | 5,008332731  | 5,266233061  | -0,25790033 |  |
| 242957_at    | VWCE             | 1,748661581  | 2,006570641  | -0,25790906 |  |
| 204088_at    | P2RX4            | 2,171078719  | 2,428994491  | -0,25791577 |  |
| 239723_at    | -                | 3,67603922   | 3,933981372  | -0,25794215 |  |
| 1555736_a_at | AGTRAP           | 1,607231019  | 1,865308541  | -0,25807752 |  |
| 227230_s_at  | KIAA1211         | 1,607231019  | 1,865308541  | -0,25807752 |  |
| 212314_at    | SEL1L3           | 0,702292136  | 0,960386719  | -0,25809458 |  |
| 209320_at    | ADCY3            | -0,394749123 | -0,136643983 | -0,25810514 |  |
| 242478_at    | -                | -0,394749123 | -0,136643983 | -0,25810514 |  |
| 244124_at    | RAB37            | -0,394749123 | -0,136643983 | -0,25810514 |  |
| 219270_at    | CHAC1            | 1,191926657  | 1,450051551  | -0,25812489 |  |
| 230788_at    | GCNT2            | 1,191926657  | 1,450051551  | -0,25812489 |  |
| 1562004_x_at | MYOZ3            | 0,606430281  | 0,864649967  | -0,25821969 |  |
| 215342_s_at  | RABGAP1L         | 1,296557217  | 1,55481039   | -0,25825317 |  |
| 1554004_a_at | RGNEF            | -2,667025278 | -2,408705138 | -0,25832014 |  |
| 1555001_at   | IQCF1            | -2,667025278 | -2,408705138 | -0,25832014 |  |
| 1555099_at   | MPP4             | -2,667025278 | -2,408705138 | -0,25832014 |  |
| 1563129_at   | -                | -2,667025278 | -2,408705138 | -0,25832014 |  |
| 1565637_at   | -                | -2,667025278 | -2,408705138 | -0,25832014 |  |
| 1568722_at   | LOC100506832     | -2,667025278 | -2,408705138 | -0,25832014 |  |
| 1568902_at   | -                | -2,667025278 | -2,408705138 | -0,25832014 |  |
| 1569544_at   | -                | -2,667025278 | -2,408705138 | -0,25832014 |  |
| 1570292_at   | -                | -2,667025278 | -2,408705138 | -0,25832014 |  |
| 204816_s_at  | DHX34            | -2,667025278 | -2,408705138 | -0,25832014 |  |
| 206895_at    | PPP1R3A          | -2,667025278 | -2,408705138 | -0,25832014 |  |
| 208062_s_at  | NRG2             | -2,667025278 | -2,408705138 | -0,25832014 |  |
| 208571_at    | ANP32D           | -2,667025278 | -2,408705138 | -0,25832014 |  |
| 215317_at    | -                | -2,667025278 | -2,408705138 | -0,25832014 |  |
| 215900_at    | -                | -2,667025278 | -2,408705138 | -0,25832014 |  |

|              |                |              |              |             |  |
|--------------|----------------|--------------|--------------|-------------|--|
| 216034_at    | ZNF280A        | -2,667025278 | -2,408705138 | -0,25832014 |  |
| 216868_s_at  | -              | -2,667025278 | -2,408705138 | -0,25832014 |  |
| 228737_at    | TOX2           | -2,667025278 | -2,408705138 | -0,25832014 |  |
| 229472_at    | SFT2D3 /// WDR | -2,667025278 | -2,408705138 | -0,25832014 |  |
| 233784_at    | -              | -2,667025278 | -2,408705138 | -0,25832014 |  |
| 237303_at    | -              | -2,667025278 | -2,408705138 | -0,25832014 |  |
| 237613_at    | FOXR1          | -2,667025278 | -2,408705138 | -0,25832014 |  |
| 239291_at    | -              | -2,667025278 | -2,408705138 | -0,25832014 |  |
| 239611_at    | -              | -2,667025278 | -2,408705138 | -0,25832014 |  |
| 240062_at    | FAM3C          | -2,667025278 | -2,408705138 | -0,25832014 |  |
| 242045_at    | -              | -2,667025278 | -2,408705138 | -0,25832014 |  |
| 243504_at    | -              | -2,667025278 | -2,408705138 | -0,25832014 |  |
| 1557948_at   | PHLDB3         | 0,052199481  | 0,310717132  | -0,25851765 |  |
| 219882_at    | TTLL7          | 0,052199481  | 0,310717132  | -0,25851765 |  |
| 234338_s_at  | ZBTB47         | 0,052199481  | 0,310717132  | -0,25851765 |  |
| 235405_at    | GSTA4          | 0,052199481  | 0,310717132  | -0,25851765 |  |
| 223360_at    | C21orf56       | 4,74286981   | 5,001477105  | -0,25860729 |  |
| 200649_at    | NUCB1          | 1,844820248  | 2,103505212  | -0,25868496 |  |
| 238923_at    | SPOP           | 0,273439642  | 0,532164371  | -0,25872473 |  |
| 229086_at    | C1orf213       | 0,728550685  | 0,987376598  | -0,25882591 |  |
| 214209_s_at  | ABCB9          | 0,46522187   | 0,724100169  | -0,2588783  |  |
| 1553359_at   | FBXL18         | 2,001086023  | 2,259997914  | -0,25891189 |  |
| 203488_at    | LPHN1          | 0,87091093   | 1,129843209  | -0,25893228 |  |
| 222565_s_at  | PRKD3          | 0,87091093   | 1,129843209  | -0,25893228 |  |
| 228529_at    | NAA38          | 0,87091093   | 1,129843209  | -0,25893228 |  |
| 231130_at    | FKBP7          | 0,87091093   | 1,129843209  | -0,25893228 |  |
| 238295_at    | TEFM           | 0,87091093   | 1,129843209  | -0,25893228 |  |
| 44146_at     | GMEB2          | 3,04056337   | 3,299544165  | -0,2589808  |  |
| 235173_at    | LOC401093      | 1,000476627  | 1,259496994  | -0,25902037 |  |
| 224434_s_at  | WDR83          | 1,883312263  | 2,14244844   | -0,25913618 |  |
| 1564143_at   | -              | -1,591296941 | -1,332017329 | -0,25927961 |  |
| 205043_at    | CFTR           | -1,591296941 | -1,332017329 | -0,25927961 |  |
| 207139_at    | ATP4A          | -1,591296941 | -1,332017329 | -0,25927961 |  |
| 210012_s_at  | EWSR1          | -1,591296941 | -1,332017329 | -0,25927961 |  |
| 214803_at    | CDH6           | -1,591296941 | -1,332017329 | -0,25927961 |  |
| 220001_at    | PADI4          | -1,591296941 | -1,332017329 | -0,25927961 |  |
| 220728_at    | -              | -1,591296941 | -1,332017329 | -0,25927961 |  |
| 227367_at    | SLCO3A1        | -1,591296941 | -1,332017329 | -0,25927961 |  |
| 228827_at    | RUNX1T1        | -1,591296941 | -1,332017329 | -0,25927961 |  |
| 230498_at    | MCHR1          | -1,591296941 | -1,332017329 | -0,25927961 |  |
| 231693_at    | FABP1          | -1,591296941 | -1,332017329 | -0,25927961 |  |
| 235868_at    | MGEA5          | -1,591296941 | -1,332017329 | -0,25927961 |  |
| 237118_at    | -              | -1,591296941 | -1,332017329 | -0,25927961 |  |
| 239802_at    | SAP30L         | -1,591296941 | -1,332017329 | -0,25927961 |  |
| 241526_at    | -              | -1,591296941 | -1,332017329 | -0,25927961 |  |
| 243139_at    | SV2C           | -1,591296941 | -1,332017329 | -0,25927961 |  |
| 243144_at    | -              | -1,591296941 | -1,332017329 | -0,25927961 |  |
| 1558135_at   | TAF11          | -0,79540287  | -0,536087151 | -0,25931572 |  |
| 1560625_s_at | -              | -0,79540287  | -0,536087151 | -0,25931572 |  |
| 1565559_at   | MAGIX          | -0,79540287  | -0,536087151 | -0,25931572 |  |
| 208982_at    | PECAM1         | -0,79540287  | -0,536087151 | -0,25931572 |  |
| 213559_s_at  | ZNF467         | -0,79540287  | -0,536087151 | -0,25931572 |  |
| 214454_at    | ADAMTS2        | -0,79540287  | -0,536087151 | -0,25931572 |  |
| 217263_x_at  | LOC100506403 / | -0,79540287  | -0,536087151 | -0,25931572 |  |
| 240652_at    | -              | -0,79540287  | -0,536087151 | -0,25931572 |  |
| 207593_at    | ABCG4          | -0,543051993 | -0,283667828 | -0,25938417 |  |

|              |                 |              |              |             |  |
|--------------|-----------------|--------------|--------------|-------------|--|
| 217324_at    | -               | -0,543051993 | -0,283667828 | -0,25938417 |  |
| 238450_at    | PFKFB2          | -0,543051993 | -0,283667828 | -0,25938417 |  |
| 239322_at    | CEP41           | -0,543051993 | -0,283667828 | -0,25938417 |  |
| 223220_s_at  | PARP9           | 2,2992452    | 2,558821855  | -0,25957665 |  |
| 243899_at    | ARL17A /// ARL1 | 1,021868205  | 1,281471383  | -0,25960318 |  |
| 81737_at     | LOC100505915    | -0,822860699 | -0,563234158 | -0,25962654 |  |
| 1558387_at   | UG0898H09       | -3,533506662 | -3,273861381 | -0,25964528 |  |
| 214168_s_at  | TJP1            | 1,348276312  | 1,60795124   | -0,25967493 |  |
| 228614_at    | LINC00116       | 1,348276312  | 1,60795124   | -0,25967493 |  |
| 220993_s_at  | GPR63           | 0,30867765   | 0,568365095  | -0,25968745 |  |
| 205919_at    | HBE1            | 4,130223557  | 4,389920115  | -0,25969656 |  |
| 226073_at    | TMEM218         | 1,530951994  | 1,790660532  | -0,25970854 |  |
| 212332_at    | RBL2            | 0,496120222  | 0,755840599  | -0,25972038 |  |
| 235871_at    | LIPH            | 0,661985843  | 0,921731975  | -0,25974613 |  |
| 202594_at    | LEPROTL1        | 4,029534322  | 4,289400623  | -0,2598663  |  |
| 211719_x_at  | FN1             | 1,751865623  | 2,011838132  | -0,25997251 |  |
| 207194_s_at  | ICAM4           | 2,956271699  | 3,216434104  | -0,26016241 |  |
| 225336_at    | SCAF11          | 3,582860873  | 3,843079586  | -0,26021871 |  |
| 229433_at    | RBM26           | 1,764611101  | 2,024923328  | -0,26031223 |  |
| 210317_s_at  | YWHAE           | 2,807162789  | 3,067567462  | -0,26040467 |  |
| 202240_at    | PLK1            | 1,560488174  | 1,820984782  | -0,26049661 |  |
| 229963_at    | BEX5            | 1,560488174  | 1,820984782  | -0,26049661 |  |
| 225818_s_at  | TBRG1           | 1,283332461  | 1,543943227  | -0,26061077 |  |
| 1563467_at   | -               | 0,133056859  | 0,393761504  | -0,26070465 |  |
| 219696_at    | DENND1B         | 0,133056859  | 0,393761504  | -0,26070465 |  |
| 223615_at    | ABI3            | 0,133056859  | 0,393761504  | -0,26070465 |  |
| 241433_at    | RCOR3           | 0,133056859  | 0,393761504  | -0,26070465 |  |
| 215218_s_at  | WDR62           | 1,655931423  | 1,916759838  | -0,26082841 |  |
| 1569378_at   | LOC100292680    | -1,026571149 | -0,765504029 | -0,26106712 |  |
| 208130_s_at  | TBXAS1          | -1,026571149 | -0,765504029 | -0,26106712 |  |
| 209886_s_at  | SMAD6           | -1,026571149 | -0,765504029 | -0,26106712 |  |
| 215326_at    | PAK4            | -1,026571149 | -0,765504029 | -0,26106712 |  |
| 216412_x_at  | CKAP2 /// IGLC1 | -1,026571149 | -0,765504029 | -0,26106712 |  |
| 227415_at    | LOC283508       | -1,026571149 | -0,765504029 | -0,26106712 |  |
| 229776_at    | SLCO3A1         | -1,026571149 | -0,765504029 | -0,26106712 |  |
| 231015_at    | KLF15           | -1,026571149 | -0,765504029 | -0,26106712 |  |
| 232542_at    | COL9A2          | -1,026571149 | -0,765504029 | -0,26106712 |  |
| 233848_x_at  | ZNF221          | -1,026571149 | -0,765504029 | -0,26106712 |  |
| 236707_at    | DAPP1           | -1,026571149 | -0,765504029 | -0,26106712 |  |
| 237886_at    | -               | -1,026571149 | -0,765504029 | -0,26106712 |  |
| 239285_at    | -               | -1,026571149 | -0,765504029 | -0,26106712 |  |
| 244196_at    | -               | -1,026571149 | -0,765504029 | -0,26106712 |  |
| 212818_s_at  | ASB1            | 1,638726528  | 1,899812471  | -0,26108594 |  |
| 1558467_a_at | UGGT2           | 0,715481152  | 0,976641161  | -0,26116001 |  |
| 209371_s_at  | SH3BP2          | 0,715481152  | 0,976641161  | -0,26116001 |  |
| 222597_at    | SNAP29          | 0,715481152  | 0,976641161  | -0,26116001 |  |
| 223109_at    | TRUB2           | 2,259277178  | 2,520531219  | -0,26125404 |  |
| 215798_at    | ALDH1L1         | -0,285837228 | -0,024572586 | -0,26126464 |  |
| 222485_at    | FKBP3 /// LOC10 | -0,285837228 | -0,024572586 | -0,26126464 |  |
| 223969_s_at  | RETNLB          | -0,285837228 | -0,024572586 | -0,26126464 |  |
| 217556_at    | CLCN4           | 0,962260738  | 1,223626587  | -0,26136585 |  |
| 201216_at    | ERP29           | 4,777474446  | 5,038885834  | -0,26141139 |  |
| 1558915_a_at | PEX14           | -1,173767127 | -0,912331589 | -0,26143554 |  |
| 1560744_at   | LOC100505906    | -1,173767127 | -0,912331589 | -0,26143554 |  |
| 1566803_at   | -               | -1,173767127 | -0,912331589 | -0,26143554 |  |
| 1570107_at   | -               | -1,173767127 | -0,912331589 | -0,26143554 |  |

|              |           |              |              |             |  |
|--------------|-----------|--------------|--------------|-------------|--|
| 210382_at    | SCTR      | -1,173767127 | -0,912331589 | -0,26143554 |  |
| 229727_x_at  | C2CD4B    | -1,173767127 | -0,912331589 | -0,26143554 |  |
| 230677_at    | EXOC3L4   | -1,173767127 | -0,912331589 | -0,26143554 |  |
| 236625_at    | -         | -1,173767127 | -0,912331589 | -0,26143554 |  |
| 237970_at    | -         | -1,173767127 | -0,912331589 | -0,26143554 |  |
| 213843_x_at  | SLC6A8    | 3,167755526  | 3,429217209  | -0,26146168 |  |
| 213585_s_at  | PDCD2     | 0,82905153   | 1,090553537  | -0,26150201 |  |
| 201975_at    | CLIP1     | 1,011212064  | 1,272721751  | -0,26150969 |  |
| 219157_at    | KLHL2     | 1,683039483  | 1,944570415  | -0,26153093 |  |
| 34726_at     | CACNB3    | -0,843214231 | -0,581641536 | -0,2615727  |  |
| 202254_at    | SIPA1L1   | 0,882651021  | 1,144305291  | -0,26165427 |  |
| 203592_s_at  | FSTL3     | 0,171847695  | 0,433557298  | -0,2617096  |  |
| 238150_at    | -         | 0,171847695  | 0,433557298  | -0,2617096  |  |
| 207968_s_at  | MEF2C     | 0,255492549  | 0,51742585   | -0,2619333  |  |
| 218144_s_at  | INF2      | 0,255492549  | 0,51742585   | -0,2619333  |  |
| 221526_x_at  | PARD3     | 1,880387527  | 2,14244844   | -0,26206091 |  |
| 214448_x_at  | NFKBIB    | 2,254767157  | 2,516830926  | -0,26206377 |  |
| 1553505_at   | A2ML1     | -1,639579028 | -1,377419394 | -0,26215963 |  |
| 1554447_at   | JPX       | -1,639579028 | -1,377419394 | -0,26215963 |  |
| 1558544_at   | C1orf86   | -1,639579028 | -1,377419394 | -0,26215963 |  |
| 1568843_at   | TTLL13    | -1,639579028 | -1,377419394 | -0,26215963 |  |
| 1569499_at   | -         | -1,639579028 | -1,377419394 | -0,26215963 |  |
| 208311_at    | GPR50     | -1,639579028 | -1,377419394 | -0,26215963 |  |
| 208981_at    | PECAM1    | -1,639579028 | -1,377419394 | -0,26215963 |  |
| 215609_at    | -         | -1,639579028 | -1,377419394 | -0,26215963 |  |
| 217298_at    | RPS14     | -1,639579028 | -1,377419394 | -0,26215963 |  |
| 220361_at    | IQCH      | -1,639579028 | -1,377419394 | -0,26215963 |  |
| 223855_s_at  | MCHR1     | -1,639579028 | -1,377419394 | -0,26215963 |  |
| 231152_at    | INO80D    | -1,639579028 | -1,377419394 | -0,26215963 |  |
| 231476_at    | -         | -1,639579028 | -1,377419394 | -0,26215963 |  |
| 232302_at    | PDLIM2    | -1,639579028 | -1,377419394 | -0,26215963 |  |
| 232798_at    | DNAJC5B   | -1,639579028 | -1,377419394 | -0,26215963 |  |
| 234817_at    | -         | -1,639579028 | -1,377419394 | -0,26215963 |  |
| 241565_at    | COL4A4    | -1,639579028 | -1,377419394 | -0,26215963 |  |
| 243954_at    | LOC285286 | -1,639579028 | -1,377419394 | -0,26215963 |  |
| 244501_at    | EVI5L     | -1,639579028 | -1,377419394 | -0,26215963 |  |
| 239390_at    | GTDC1     | 0,03125738   | 0,293518836  | -0,26226146 |  |
| 1554628_at   | ZNF57     | 1,865674241  | 2,127967638  | -0,2622934  |  |
| 1553799_at   | FAM227B   | -2,597496523 | -2,335104118 | -0,26239241 |  |
| 1560762_at   | LOC285972 | -2,597496523 | -2,335104118 | -0,26239241 |  |
| 1562201_x_at | -         | -2,597496523 | -2,335104118 | -0,26239241 |  |
| 1570127_at   | -         | -2,597496523 | -2,335104118 | -0,26239241 |  |
| 205065_at    | ENPP1     | -2,597496523 | -2,335104118 | -0,26239241 |  |
| 205358_at    | GRIA2     | -2,597496523 | -2,335104118 | -0,26239241 |  |
| 207989_at    | OPRM1     | -2,597496523 | -2,335104118 | -0,26239241 |  |
| 221451_s_at  | OR2W1     | -2,597496523 | -2,335104118 | -0,26239241 |  |
| 223864_at    | ANKRD30A  | -2,597496523 | -2,335104118 | -0,26239241 |  |
| 231669_at    | SEPP1     | -2,597496523 | -2,335104118 | -0,26239241 |  |
| 234402_at    | YME1L1    | -2,597496523 | -2,335104118 | -0,26239241 |  |
| 237755_s_at  | WDR16     | -2,597496523 | -2,335104118 | -0,26239241 |  |
| 239309_at    | DLX6      | -2,597496523 | -2,335104118 | -0,26239241 |  |
| 240502_at    | -         | -2,597496523 | -2,335104118 | -0,26239241 |  |
| 241456_at    | FAM78B    | -2,597496523 | -2,335104118 | -0,26239241 |  |
| 241572_at    | PDZD9     | -2,597496523 | -2,335104118 | -0,26239241 |  |
| 244363_at    | ROS1      | -2,597496523 | -2,335104118 | -0,26239241 |  |
| 227897_at    | -         | 4,14492148   | 4,407512498  | -0,26259102 |  |

|             |                 |              |              |             |  |
|-------------|-----------------|--------------|--------------|-------------|--|
| 206411_s_at | ABL2            | -0,234278768 | 0,028364014  | -0,26264278 |  |
| 208535_x_at | COL13A1         | -0,234278768 | 0,028364014  | -0,26264278 |  |
| 235478_at   | DCLRE1C         | -0,234278768 | 0,028364014  | -0,26264278 |  |
| 212346_s_at | MIR4800 /// MXD | 0,613492853  | 0,876248481  | -0,26275563 |  |
| 220896_at   | FBXL18          | 0,613492853  | 0,876248481  | -0,26275563 |  |
| 203045_at   | NINJ1           | 1,369290453  | 1,632095957  | -0,2628055  |  |
| 1569604_at  | LOC100133612    | 0,928678725  | 1,191491281  | -0,26281256 |  |
| 227145_at   | LOXL4           | 0,291166226  | 0,553993624  | -0,2628274  |  |
| 243817_at   | -               | 0,291166226  | 0,553993624  | -0,2628274  |  |
| 226355_at   | POC1A           | 1,735773781  | 1,998633167  | -0,26285939 |  |
| 227873_at   | TXNDC15         | 1,735773781  | 1,998633167  | -0,26285939 |  |
| 204107_at   | NFYA            | 3,056846434  | 3,319860027  | -0,26301359 |  |
| 225285_at   | BCAT1           | 3,056846434  | 3,319860027  | -0,26301359 |  |
| 208765_s_at | HNRNPR          | 3,358484112  | 3,621520989  | -0,26303688 |  |
| 206645_s_at | NR0B1           | 1,990274687  | 2,253342112  | -0,26306743 |  |
| 242968_at   | -               | 1,073999308  | 1,337086025  | -0,26308672 |  |
| 1556127_at  | DIP2A           | 0,792179257  | 1,055274826  | -0,26309557 |  |
| 1557830_at  | -               | 0,792179257  | 1,055274826  | -0,26309557 |  |
| 243824_at   | -               | 0,44160593   | 0,704715219  | -0,26310929 |  |
| 205484_at   | SIT1            | -0,423248115 | -0,160136748 | -0,26311137 |  |
| 205775_at   | FAM50B          | -0,423248115 | -0,160136748 | -0,26311137 |  |
| 206444_at   | PDE1B           | -0,423248115 | -0,160136748 | -0,26311137 |  |
| 207911_s_at | TGM5            | -0,423248115 | -0,160136748 | -0,26311137 |  |
| 221298_s_at | SLC22A8         | -0,423248115 | -0,160136748 | -0,26311137 |  |
| 224283_x_at | IL18BP          | -0,423248115 | -0,160136748 | -0,26311137 |  |
| 230164_at   | ZNF621          | -0,423248115 | -0,160136748 | -0,26311137 |  |
| 201030_x_at | LDHB            | 5,985756253  | 6,248942712  | -0,26318646 |  |
| 226515_at   | CCDC127         | 2,846658948  | 3,109937707  | -0,26327876 |  |
| 209709_s_at | HMMR            | 3,333038605  | 3,596320795  | -0,26328219 |  |
| 230071_at   | 40787           | 0,072842263  | 0,336136178  | -0,26329392 |  |
| 235695_at   | INPP4A          | 0,072842263  | 0,336136178  | -0,26329392 |  |
| 204315_s_at | GTSE1           | 0,641402394  | 0,904843258  | -0,26344086 |  |
| 236018_at   | -               | 0,641402394  | 0,904843258  | -0,26344086 |  |
| 202771_at   | PIEZO1          | 3,691139316  | 3,954643074  | -0,26350376 |  |
| 202949_s_at | FHL2            | 4,995211951  | 5,258775506  | -0,26356356 |  |
| 208968_s_at | CIAPIN1         | 4,196392479  | 4,460001797  | -0,26360932 |  |
| 229883_at   | GRIN2D          | 2,082235068  | 2,345926937  | -0,26369187 |  |
| 1554744_at  | CARD16          | -3,15396682  | -2,89013181  | -0,26383501 |  |
| 1562472_at  | -               | -3,15396682  | -2,89013181  | -0,26383501 |  |
| 1564718_at  | -               | -3,15396682  | -2,89013181  | -0,26383501 |  |
| 1566272_at  | RALGAPA1        | -3,15396682  | -2,89013181  | -0,26383501 |  |
| 205430_at   | BMP5            | -3,15396682  | -2,89013181  | -0,26383501 |  |
| 216575_at   | -               | -3,15396682  | -2,89013181  | -0,26383501 |  |
| 233045_at   | -               | -3,15396682  | -2,89013181  | -0,26383501 |  |
| 237391_at   | LOC100507160    | -3,15396682  | -2,89013181  | -0,26383501 |  |
| 237996_at   | -               | -3,15396682  | -2,89013181  | -0,26383501 |  |
| 1569178_at  | GRIA4           | -3,5000184   | -3,236070201 | -0,2639482  |  |
| 223809_at   | RGS18           | 1,454352496  | 1,718396606  | -0,26404411 |  |
| 200767_s_at | FAM120A         | 1,114389003  | 1,378453643  | -0,26406464 |  |
| 233296_x_at | -               | 1,114389003  | 1,378453643  | -0,26406464 |  |
| 218019_s_at | PDXK            | 3,882346871  | 4,146452482  | -0,26410561 |  |
| 210131_x_at | SDHC            | 4,053102157  | 4,317323511  | -0,26422135 |  |
| 1554201_at  | CABP4           | 0,359971644  | 0,624460759  | -0,26448912 |  |
| 230691_at   | STX1B           | 0,359971644  | 0,624460759  | -0,26448912 |  |
| 235369_at   | C14orf28        | 0,359971644  | 0,624460759  | -0,26448912 |  |
| 236696_at   | U2SURP          | 0,359971644  | 0,624460759  | -0,26448912 |  |

|              |                |              |              |             |  |
|--------------|----------------|--------------|--------------|-------------|--|
| 203171_s_at  | RRP8           | 2,14450783   | 2,409170778  | -0,26466295 |  |
| 204377_s_at  | VPRBP          | -0,366776884 | -0,102100538 | -0,26467635 |  |
| 208611_s_at  | SPTAN1         | -0,366776884 | -0,102100538 | -0,26467635 |  |
| 222868_s_at  | IL18BP         | -0,366776884 | -0,102100538 | -0,26467635 |  |
| 231420_at    | GGN            | -0,366776884 | -0,102100538 | -0,26467635 |  |
| 1555757_at   | C7orf34        | -2,551294263 | -2,286583451 | -0,26471081 |  |
| 1561300_at   | -              | -2,551294263 | -2,286583451 | -0,26471081 |  |
| 1570628_at   | -              | -2,551294263 | -2,286583451 | -0,26471081 |  |
| 203990_s_at  | KDM6A          | -2,551294263 | -2,286583451 | -0,26471081 |  |
| 214528_s_at  | PAX8           | -2,551294263 | -2,286583451 | -0,26471081 |  |
| 215575_at    | PDE4DIP        | -2,551294263 | -2,286583451 | -0,26471081 |  |
| 216997_x_at  | TLE4           | -2,551294263 | -2,286583451 | -0,26471081 |  |
| 218691_s_at  | PDLIM4         | -2,551294263 | -2,286583451 | -0,26471081 |  |
| 220931_at    | C13orf44       | -2,551294263 | -2,286583451 | -0,26471081 |  |
| 224102_at    | P2RY12         | -2,551294263 | -2,286583451 | -0,26471081 |  |
| 231432_at    | -              | -2,551294263 | -2,286583451 | -0,26471081 |  |
| 232827_at    | -              | -2,551294263 | -2,286583451 | -0,26471081 |  |
| 233611_at    | -              | -2,551294263 | -2,286583451 | -0,26471081 |  |
| 233957_at    | -              | -2,551294263 | -2,286583451 | -0,26471081 |  |
| 234699_at    | RNASE7         | -2,551294263 | -2,286583451 | -0,26471081 |  |
| 239500_at    | EFCAB1         | -2,551294263 | -2,286583451 | -0,26471081 |  |
| 240353_s_at  | C12orf54       | -2,551294263 | -2,286583451 | -0,26471081 |  |
| 242650_at    | -              | -2,551294263 | -2,286583451 | -0,26471081 |  |
| 243226_at    | -              | -2,551294263 | -2,286583451 | -0,26471081 |  |
| 243555_at    | -              | -2,551294263 | -2,286583451 | -0,26471081 |  |
| 219733_s_at  | SLC27A5        | 2,993291442  | 3,258033502  | -0,26474206 |  |
| 1552712_a_at | NMNAT2         | -1,688127507 | -1,423348341 | -0,26477917 |  |
| 1553539_at   | KRT74          | -1,688127507 | -1,423348341 | -0,26477917 |  |
| 1557118_a_at | -              | -1,688127507 | -1,423348341 | -0,26477917 |  |
| 1558502_s_at | DNM3           | -1,688127507 | -1,423348341 | -0,26477917 |  |
| 1560792_at   | -              | -1,688127507 | -1,423348341 | -0,26477917 |  |
| 207840_at    | CD160          | -1,688127507 | -1,423348341 | -0,26477917 |  |
| 210702_s_at  | PTGIS          | -1,688127507 | -1,423348341 | -0,26477917 |  |
| 211002_s_at  | TRIM29         | -1,688127507 | -1,423348341 | -0,26477917 |  |
| 213303_x_at  | ZBTB7A         | -1,688127507 | -1,423348341 | -0,26477917 |  |
| 215188_at    | STK24          | -1,688127507 | -1,423348341 | -0,26477917 |  |
| 225968_at    | PRICKLE2       | -1,688127507 | -1,423348341 | -0,26477917 |  |
| 228103_s_at  | -              | -1,688127507 | -1,423348341 | -0,26477917 |  |
| 235299_at    | SLC41A2        | -1,688127507 | -1,423348341 | -0,26477917 |  |
| 235987_at    | PRKXP1         | -1,688127507 | -1,423348341 | -0,26477917 |  |
| 236612_at    | -              | -1,688127507 | -1,423348341 | -0,26477917 |  |
| 236700_at    | EIF3C          | -1,688127507 | -1,423348341 | -0,26477917 |  |
| 238288_at    | LOC100506838   | -1,688127507 | -1,423348341 | -0,26477917 |  |
| 239085_at    | JDP2           | -1,688127507 | -1,423348341 | -0,26477917 |  |
| 243457_s_at  | ZNF214         | -1,688127507 | -1,423348341 | -0,26477917 |  |
| 244428_at    | DNMT3A         | -1,688127507 | -1,423348341 | -0,26477917 |  |
| 214055_x_at  | PRRC2C         | 3,75400739   | 4,018839599  | -0,26483221 |  |
| 219945_at    | DDX25          | 2,739371812  | 3,004228687  | -0,26485687 |  |
| 223378_at    | GLIS2          | 1,153678675  | 1,418668082  | -0,26498941 |  |
| 1556552_a_at | ACSF3          | -0,83191556  | -0,566887459 | -0,2650281  |  |
| 209697_at    | LOC100507088   | -0,83191556  | -0,566887459 | -0,2650281  |  |
| 213001_at    | ANGPTL2        | -0,83191556  | -0,566887459 | -0,2650281  |  |
| 214657_s_at  | LOC100653017 / | -0,83191556  | -0,566887459 | -0,2650281  |  |
| 225188_at    | RAPH1          | -0,83191556  | -0,566887459 | -0,2650281  |  |
| 231369_at    | ZNF333         | -0,83191556  | -0,566887459 | -0,2650281  |  |
| 236552_at    | -              | -0,83191556  | -0,566887459 | -0,2650281  |  |



|              |                 |              |              |             |  |
|--------------|-----------------|--------------|--------------|-------------|--|
| 236914_at    | LOC100506790    | -0,83191556  | -0,566887459 | -0,2650281  |  |
| 223964_x_at  | -               | 1,394109935  | 1,659204017  | -0,26509408 |  |
| 201593_s_at  | ZC3H15          | 4,494396751  | 4,759522298  | -0,26512555 |  |
| 228617_at    | XAF1            | 0,152582607  | 0,417770464  | -0,26518786 |  |
| 229164_s_at  | ABTB1           | 0,152582607  | 0,417770464  | -0,26518786 |  |
| 240274_at    | -               | 0,152582607  | 0,417770464  | -0,26518786 |  |
| 209431_s_at  | PATZ1           | 1,889144008  | 2,154405725  | -0,26526172 |  |
| 78330_at     | ZNF335          | -0,621418049 | -0,356107021 | -0,26531103 |  |
| 214973_x_at  | IGHD            | -0,655928373 | -0,39061235  | -0,26531602 |  |
| 217152_at    | -               | -0,655928373 | -0,39061235  | -0,26531602 |  |
| 237599_at    | -               | -0,655928373 | -0,39061235  | -0,26531602 |  |
| 244012_x_at  | -               | -0,655928373 | -0,39061235  | -0,26531602 |  |
| 226768_at    | GIGYF1          | 0,888485433  | 1,153866761  | -0,26538133 |  |
| 208605_s_at  | NTRK1           | 1,037706275  | 1,303116084  | -0,26540981 |  |
| 202248_at    | E2F4            | 1,296557217  | 1,562009954  | -0,26545274 |  |
| 225405_at    | HNRNPUL2        | 3,149650293  | 3,415371412  | -0,26572112 |  |
| 221767_x_at  | HDLBP           | 3,723323886  | 3,989102799  | -0,26577891 |  |
| 218438_s_at  | MED28           | 3,962664437  | 4,228489721  | -0,26582528 |  |
| 204526_s_at  | TBC1D8          | 0,747935635  | 1,013870809  | -0,26593517 |  |
| 211070_x_at  | DBI             | 5,474467519  | 5,740457167  | -0,26598965 |  |
| 1559893_at   | CCDC75          | 0,425644434  | 0,691645685  | -0,26600125 |  |
| 201215_at    | PLS3            | 2,849652795  | 3,116064987  | -0,26641219 |  |
| 206478_at    | KIAA0125        | 2,849652795  | 3,116064987  | -0,26641219 |  |
| 242206_at    | -               | 2,794789337  | 3,061230246  | -0,26644091 |  |
| 217868_s_at  | METTL9          | 4,177454337  | 4,44401622   | -0,26656188 |  |
| 209671_x_at  | TRAC            | 1,269985355  | 1,536652708  | -0,26666735 |  |
| 225852_at    | ANKRD17         | 2,970093718  | 3,236821511  | -0,26672779 |  |
| 201952_at    | ALCAM           | 1,575032557  | 1,841838775  | -0,26680622 |  |
| 203936_s_at  | MMP9            | 0,228146222  | 0,495031851  | -0,26688563 |  |
| 242853_at    | -               | 0,228146222  | 0,495031851  | -0,26688563 |  |
| 219631_at    | LRP12           | 3,434229569  | 3,701119714  | -0,26689015 |  |
| 211800_s_at  | USP4            | 3,809644985  | 4,076535251  | -0,26689027 |  |
| 224964_s_at  | GNG2            | 4,332089668  | 4,599047207  | -0,26695754 |  |
| 202645_s_at  | MEN1            | 2,621710292  | 2,888726553  | -0,26701626 |  |
| 1552684_a_at | SENP8           | -0,946847173 | -0,679763839 | -0,26708333 |  |
| 1560982_at   | -               | -0,946847173 | -0,679763839 | -0,26708333 |  |
| 206223_at    | LMTK2           | -0,946847173 | -0,679763839 | -0,26708333 |  |
| 209783_at    | DBP             | -0,946847173 | -0,679763839 | -0,26708333 |  |
| 216461_at    | -               | -0,946847173 | -0,679763839 | -0,26708333 |  |
| 221067_s_at  | C12orf39        | -0,946847173 | -0,679763839 | -0,26708333 |  |
| 228267_at    | TRIM11          | -0,946847173 | -0,679763839 | -0,26708333 |  |
| 231673_at    | -               | -0,946847173 | -0,679763839 | -0,26708333 |  |
| 235680_at    | -               | -0,946847173 | -0,679763839 | -0,26708333 |  |
| 240249_at    | -               | -0,946847173 | -0,679763839 | -0,26708333 |  |
| 240818_at    | -               | -0,946847173 | -0,679763839 | -0,26708333 |  |
| 242689_at    | RALGPS1         | -0,946847173 | -0,679763839 | -0,26708333 |  |
| 244131_at    | HNRNPA2B1       | -0,946847173 | -0,679763839 | -0,26708333 |  |
| 226590_at    | ZNF618          | 0,682279745  | 0,949447784  | -0,26716804 |  |
| 205822_s_at  | HMGCS1          | 2,277177578  | 2,544354523  | -0,26717694 |  |
| 203737_s_at  | PPRC1           | 3,173740462  | 3,440980183  | -0,26723972 |  |
| 1554003_at   | RGNEF           | -0,259832361 | 0,007421914  | -0,26725428 |  |
| 1554989_at   | KIAA0317        | -0,259832361 | 0,007421914  | -0,26725428 |  |
| 1559140_at   | FAM87A /// FAM8 | -0,259832361 | 0,007421914  | -0,26725428 |  |
| 219573_at    | LRRC16A         | -0,259832361 | 0,007421914  | -0,26725428 |  |
| 227753_at    | TMEM139         | -0,259832361 | 0,007421914  | -0,26725428 |  |
| 244777_at    | DCP2            | 1,726031811  | 1,993317152  | -0,26728534 |  |

|              |                |              |              |             |  |
|--------------|----------------|--------------|--------------|-------------|--|
| 219953_s_at  | AKIP1          | 2,427005622  | 2,694398145  | -0,26739252 |  |
| 209467_s_at  | MKNK1          | 2,487840343  | 2,755336312  | -0,26749597 |  |
| 216356_x_at  | BAIAP3         | 0,822971223  | 1,090553537  | -0,26758231 |  |
| 231299_at    | AGAP3          | 0,822971223  | 1,090553537  | -0,26758231 |  |
| 233476_at    | -              | 0,822971223  | 1,090553537  | -0,26758231 |  |
| 1552942_at   | LOC149373      | -0,59053611  | -0,322870281 | -0,26766583 |  |
| 211806_s_at  | KCNJ15         | -0,59053611  | -0,322870281 | -0,26766583 |  |
| 215577_at    | -              | -0,59053611  | -0,322870281 | -0,26766583 |  |
| 220029_at    | ELOVL2         | -0,59053611  | -0,322870281 | -0,26766583 |  |
| 220467_at    | -              | -0,59053611  | -0,322870281 | -0,26766583 |  |
| 231951_at    | GNAO1          | -0,59053611  | -0,322870281 | -0,26766583 |  |
| 233141_s_at  | ST7L           | -0,59053611  | -0,322870281 | -0,26766583 |  |
| 239666_at    | PYGO2          | -0,59053611  | -0,322870281 | -0,26766583 |  |
| 240701_at    | GSDMB          | -0,59053611  | -0,322870281 | -0,26766583 |  |
| 1556622_s_at | -              | -3,114791413 | -2,847001814 | -0,2677896  |  |
| 1561090_at   | LOC400654      | -3,114791413 | -2,847001814 | -0,2677896  |  |
| 203780_at    | MPZL2          | -3,114791413 | -2,847001814 | -0,2677896  |  |
| 217091_at    | -              | -3,114791413 | -2,847001814 | -0,2677896  |  |
| 224589_at    | XIST           | -3,114791413 | -2,847001814 | -0,2677896  |  |
| 236827_at    | -              | -3,114791413 | -2,847001814 | -0,2677896  |  |
| 237725_x_at  | SMC5           | -3,114791413 | -2,847001814 | -0,2677896  |  |
| 237804_at    | DNAH11         | -3,114791413 | -2,847001814 | -0,2677896  |  |
| 238178_at    | -              | -3,114791413 | -2,847001814 | -0,2677896  |  |
| 240772_at    | -              | -3,114791413 | -2,847001814 | -0,2677896  |  |
| 241557_x_at  | -              | -3,114791413 | -2,847001814 | -0,2677896  |  |
| 243190_at    | -              | -3,114791413 | -2,847001814 | -0,2677896  |  |
| 244006_at    | POU2F1         | -3,114791413 | -2,847001814 | -0,2677896  |  |
| 211774_s_at  | MMACHC         | 1,951783949  | 2,21959457   | -0,26781062 |  |
| 224842_at    | LOC100506060 / | 3,411111015  | 3,678940066  | -0,26782992 |  |
| 1554510_s_at | GHITM          | 4,569406661  | 4,837241027  | -0,26783437 |  |
| 202604_x_at  | ADAM10         | 1,201332287  | 1,469325098  | -0,26799281 |  |
| 219752_at    | RASAL1         | -0,00073712  | 0,26733076   | -0,26806788 |  |
| 220466_at    | CCDC15         | -0,00073712  | 0,26733076   | -0,26806788 |  |
| 223594_at    | TMEM117        | -0,00073712  | 0,26733076   | -0,26806788 |  |
| 233657_at    | OPN5           | -0,00073712  | 0,26733076   | -0,26806788 |  |
| 1556401_a_at | -              | -2,479842156 | -2,211750327 | -0,26809183 |  |
| 1557541_at   | FAM201A        | -2,479842156 | -2,211750327 | -0,26809183 |  |
| 1558534_at   | LOC100271836 / | -2,479842156 | -2,211750327 | -0,26809183 |  |
| 1560798_at   | -              | -2,479842156 | -2,211750327 | -0,26809183 |  |
| 1563085_at   | -              | -2,479842156 | -2,211750327 | -0,26809183 |  |
| 1565896_at   | -              | -2,479842156 | -2,211750327 | -0,26809183 |  |
| 1570173_at   | INTS7          | -2,479842156 | -2,211750327 | -0,26809183 |  |
| 204933_s_at  | TNFRSF11B      | -2,479842156 | -2,211750327 | -0,26809183 |  |
| 207881_at    | -              | -2,479842156 | -2,211750327 | -0,26809183 |  |
| 215800_at    | DUOX1          | -2,479842156 | -2,211750327 | -0,26809183 |  |
| 216861_at    | -              | -2,479842156 | -2,211750327 | -0,26809183 |  |
| 217531_at    | -              | -2,479842156 | -2,211750327 | -0,26809183 |  |
| 219841_at    | AICDA          | -2,479842156 | -2,211750327 | -0,26809183 |  |
| 220435_at    | SLC30A10       | -2,479842156 | -2,211750327 | -0,26809183 |  |
| 220620_at    | CRCT1          | -2,479842156 | -2,211750327 | -0,26809183 |  |
| 220719_at    | -              | -2,479842156 | -2,211750327 | -0,26809183 |  |
| 227957_at    | GSN            | -2,479842156 | -2,211750327 | -0,26809183 |  |
| 231889_at    | UBR4           | -2,479842156 | -2,211750327 | -0,26809183 |  |
| 235547_at    | N4BP2L2        | -2,479842156 | -2,211750327 | -0,26809183 |  |
| 240895_at    | -              | -2,479842156 | -2,211750327 | -0,26809183 |  |
| 241739_at    | OGFOD1         | -2,479842156 | -2,211750327 | -0,26809183 |  |

|              |                 |              |              |             |  |
|--------------|-----------------|--------------|--------------|-------------|--|
| 242244_at    | -               | -2,479842156 | -2,211750327 | -0,26809183 |  |
| 243090_at    | -               | -2,479842156 | -2,211750327 | -0,26809183 |  |
| 244887_at    | -               | -2,479842156 | -2,211750327 | -0,26809183 |  |
| 232017_at    | TJP2            | 1,567778694  | 1,835911187  | -0,26813249 |  |
| 202775_s_at  | SFSWAP          | 1,339784194  | 1,60795124   | -0,26816705 |  |
| 1552436_a_at | CDH23 /// LOC10 | -1,763254337 | -1,494668682 | -0,26858566 |  |
| 1558643_s_at | EDIL3           | -1,763254337 | -1,494668682 | -0,26858566 |  |
| 1560511_at   | -               | -1,763254337 | -1,494668682 | -0,26858566 |  |
| 1561420_a_at | -               | -1,763254337 | -1,494668682 | -0,26858566 |  |
| 1561891_at   | -               | -1,763254337 | -1,494668682 | -0,26858566 |  |
| 216674_at    | HES2            | -1,763254337 | -1,494668682 | -0,26858566 |  |
| 216933_x_at  | APC             | -1,763254337 | -1,494668682 | -0,26858566 |  |
| 219525_at    | SLC47A1         | -1,763254337 | -1,494668682 | -0,26858566 |  |
| 224120_at    | -               | -1,763254337 | -1,494668682 | -0,26858566 |  |
| 228637_at    | ZDHHC1          | -1,763254337 | -1,494668682 | -0,26858566 |  |
| 228901_at    | CDK9            | -1,763254337 | -1,494668682 | -0,26858566 |  |
| 229363_at    | LOC100505865    | -1,763254337 | -1,494668682 | -0,26858566 |  |
| 232934_at    | -               | -1,763254337 | -1,494668682 | -0,26858566 |  |
| 233088_at    | -               | -1,763254337 | -1,494668682 | -0,26858566 |  |
| 236564_at    | -               | -1,763254337 | -1,494668682 | -0,26858566 |  |
| 238256_at    | -               | -1,763254337 | -1,494668682 | -0,26858566 |  |
| 240302_at    | -               | -1,763254337 | -1,494668682 | -0,26858566 |  |
| 240830_at    | SCARNA17        | -1,763254337 | -1,494668682 | -0,26858566 |  |
| 241093_at    | -               | -1,763254337 | -1,494668682 | -0,26858566 |  |
| 241293_x_at  | -               | -1,763254337 | -1,494668682 | -0,26858566 |  |
| 242324_x_at  | CCBE1           | -1,763254337 | -1,494668682 | -0,26858566 |  |
| 209593_s_at  | TOR1B           | 2,837639949  | 3,106248809  | -0,26860886 |  |
| 227190_at    | TMEM37          | 1,089278259  | 1,3579181    | -0,26863984 |  |
| 205073_at    | CYP2J2          | -0,759588698 | -0,490927335 | -0,26866136 |  |
| 206321_at    | RFX1            | -0,759588698 | -0,490927335 | -0,26866136 |  |
| 206374_at    | DUSP8           | -0,759588698 | -0,490927335 | -0,26866136 |  |
| 211079_s_at  | DYRK1A          | -0,759588698 | -0,490927335 | -0,26866136 |  |
| 216417_x_at  | HOXB9           | -0,759588698 | -0,490927335 | -0,26866136 |  |
| 220922_s_at  | SPANXA1 /// SPA | -0,759588698 | -0,490927335 | -0,26866136 |  |
| 222863_at    | ZBTB10          | -0,759588698 | -0,490927335 | -0,26866136 |  |
| 226959_at    | CAMK1D /// LOC  | -0,759588698 | -0,490927335 | -0,26866136 |  |
| 229768_at    | OR51E1          | -0,759588698 | -0,490927335 | -0,26866136 |  |
| 233359_at    | -               | -0,759588698 | -0,490927335 | -0,26866136 |  |
| 235534_at    | -               | -0,759588698 | -0,490927335 | -0,26866136 |  |
| 238051_x_at  | PWWP2B          | -0,759588698 | -0,490927335 | -0,26866136 |  |
| 239219_at    | AURKB           | -0,759588698 | -0,490927335 | -0,26866136 |  |
| 239976_at    | -               | -0,759588698 | -0,490927335 | -0,26866136 |  |
| 240960_at    | -               | -0,759588698 | -0,490927335 | -0,26866136 |  |
| 243409_at    | FOXL1           | -0,759588698 | -0,490927335 | -0,26866136 |  |
| 229819_at    | A1BG            | 0,760715727  | 1,029536893  | -0,26882117 |  |
| 218391_at    | SNF8            | 3,405017566  | 3,673964604  | -0,26894704 |  |
| 207283_at    | RPL23AP32       | 0,945567441  | 1,214517879  | -0,26895044 |  |
| 208795_s_at  | MCM7            | 4,301804532  | 4,570773528  | -0,268969   |  |
| 224840_at    | FKBP5           | 4,165490501  | 4,434486264  | -0,26899576 |  |
| 220417_s_at  | THAP4           | 1,841816345  | 2,110887591  | -0,26907125 |  |
| 1556266_a_at | C20orf202       | -1,424023738 | -1,154897679 | -0,26912606 |  |
| 1562510_at   | LOC339442       | -1,424023738 | -1,154897679 | -0,26912606 |  |
| 203953_s_at  | CLDN3           | -1,424023738 | -1,154897679 | -0,26912606 |  |
| 206835_at    | STATH           | -1,424023738 | -1,154897679 | -0,26912606 |  |
| 208342_x_at  | CSH2            | -1,424023738 | -1,154897679 | -0,26912606 |  |
| 216040_x_at  | -               | -1,424023738 | -1,154897679 | -0,26912606 |  |

|              |                 |              |              |             |  |
|--------------|-----------------|--------------|--------------|-------------|--|
| 216901_s_at  | IKZF1           | -1,424023738 | -1,154897679 | -0,26912606 |  |
| 219744_at    | FN3K            | -1,424023738 | -1,154897679 | -0,26912606 |  |
| 229490_s_at  | -               | -1,424023738 | -1,154897679 | -0,26912606 |  |
| 230114_at    | HOXB8           | -1,424023738 | -1,154897679 | -0,26912606 |  |
| 231187_at    | SLC28A1         | -1,424023738 | -1,154897679 | -0,26912606 |  |
| 231541_s_at  | SPAG5-AS1       | -1,424023738 | -1,154897679 | -0,26912606 |  |
| 233114_at    | -               | -1,424023738 | -1,154897679 | -0,26912606 |  |
| 237702_at    | RBM45           | -1,424023738 | -1,154897679 | -0,26912606 |  |
| 237811_at    | -               | -1,424023738 | -1,154897679 | -0,26912606 |  |
| 238981_at    | TMEM223         | -1,424023738 | -1,154897679 | -0,26912606 |  |
| 243626_at    | -               | -1,424023738 | -1,154897679 | -0,26912606 |  |
| 243797_at    | STK17B          | -1,424023738 | -1,154897679 | -0,26912606 |  |
| 233919_s_at  | HABP4           | 0,334552598  | 0,603679647  | -0,26912705 |  |
| 1566144_at   | -               | 0,57782909   | 0,847075464  | -0,26924637 |  |
| 232341_x_at  | HABP4           | 0,57782909   | 0,847075464  | -0,26924637 |  |
| 219870_at    | ATF7IP2         | 3,464815649  | 3,734161076  | -0,26934543 |  |
| 201161_s_at  | CSDA            | 4,318648014  | 4,588068654  | -0,26942064 |  |
| 226874_at    | KLHL8           | 3,527851575  | 3,797294336  | -0,26944276 |  |
| 206050_s_at  | RNH1            | 3,749205801  | 4,018839599  | -0,2696338  |  |
| 228373_at    | C16orf72        | 1,191926657  | 1,461646549  | -0,26971989 |  |
| 1563542_a_at | SCML4           | -1,089016378 | -0,819238336 | -0,26977804 |  |
| 206768_at    | RPL3L           | -1,089016378 | -0,819238336 | -0,26977804 |  |
| 207658_s_at  | FOXG1           | -1,089016378 | -0,819238336 | -0,26977804 |  |
| 207930_at    | LCN1            | -1,089016378 | -0,819238336 | -0,26977804 |  |
| 221241_s_at  | BCL2L14         | -1,089016378 | -0,819238336 | -0,26977804 |  |
| 236946_at    | -               | -1,089016378 | -0,819238336 | -0,26977804 |  |
| 237026_at    | -               | -1,089016378 | -0,819238336 | -0,26977804 |  |
| 237437_s_at  | ADARB2          | -1,089016378 | -0,819238336 | -0,26977804 |  |
| 239566_at    | -               | -1,089016378 | -0,819238336 | -0,26977804 |  |
| 243423_at    | TNIP1           | -1,089016378 | -0,819238336 | -0,26977804 |  |
| 205993_s_at  | TBX2            | 0,083054335  | 0,352836757  | -0,26978242 |  |
| 215267_s_at  | SLC8A2          | 0,083054335  | 0,352836757  | -0,26978242 |  |
| 206546_at    | SYCP2           | 2,940912947  | 3,210719429  | -0,26980648 |  |
| 55583_at     | DOCK6           | 2,883642771  | 3,153484076  | -0,26984131 |  |
| 235276_at    | EPSTI1          | 1,292162421  | 1,562009954  | -0,26984753 |  |
| 1553830_s_at | MAGEA2 /// MAG  | -2,43257096  | -2,162639771 | -0,26993119 |  |
| 1555568_at   | GUSBP2          | -2,43257096  | -2,162639771 | -0,26993119 |  |
| 1561677_at   | MACROD2         | -2,43257096  | -2,162639771 | -0,26993119 |  |
| 1563559_at   | FMN1 /// LOC100 | -2,43257096  | -2,162639771 | -0,26993119 |  |
| 1563573_at   | -               | -2,43257096  | -2,162639771 | -0,26993119 |  |
| 1565265_at   | -               | -2,43257096  | -2,162639771 | -0,26993119 |  |
| 207870_at    | AKAP9           | -2,43257096  | -2,162639771 | -0,26993119 |  |
| 211689_s_at  | TMPRSS2         | -2,43257096  | -2,162639771 | -0,26993119 |  |
| 214775_at    | N4BP3           | -2,43257096  | -2,162639771 | -0,26993119 |  |
| 223836_at    | FGFBP2          | -2,43257096  | -2,162639771 | -0,26993119 |  |
| 224228_s_at  | PRDM7           | -2,43257096  | -2,162639771 | -0,26993119 |  |
| 230844_at    | LOC100507800 /  | -2,43257096  | -2,162639771 | -0,26993119 |  |
| 234824_at    | -               | -2,43257096  | -2,162639771 | -0,26993119 |  |
| 239501_at    | -               | -2,43257096  | -2,162639771 | -0,26993119 |  |
| 244540_at    | -               | -2,43257096  | -2,162639771 | -0,26993119 |  |
| 213074_at    | PHIP            | 3,617524043  | 3,887456383  | -0,26993234 |  |
| 206200_s_at  | ANXA11          | 3,605176459  | 3,875225653  | -0,27004919 |  |
| 212368_at    | ZNF292          | 2,438982012  | 2,709065209  | -0,2700832  |  |
| 244659_at    | LOC100131015    | 1,210676994  | 1,480766833  | -0,27008984 |  |
| 242028_at    | ZNF709          | 2,596981013  | 2,867091644  | -0,27011063 |  |
| 229350_x_at  | PARP10          | 1,666156729  | 1,936283387  | -0,27012666 |  |

|              |           |              |              |             |  |
|--------------|-----------|--------------|--------------|-------------|--|
| 242898_at    | EIF2AK2   | 0,209623097  | 0,479907041  | -0,27028394 |  |
| 1558875_at   | SREBF1    | -0,112808516 | 0,157549243  | -0,27035776 |  |
| 223856_at    | AKR1E2    | -0,112808516 | 0,157549243  | -0,27035776 |  |
| 230201_at    | FXR1      | -0,112808516 | 0,157549243  | -0,27035776 |  |
| 209715_at    | CBX5      | 2,55541096   | 2,825817328  | -0,27040637 |  |
| 220143_x_at  | LUC7L     | 2,208874124  | 2,479296438  | -0,27042231 |  |
| 1570124_at   | -         | 0,401366113  | 0,67181667   | -0,27045056 |  |
| 205308_at    | ZC2HC1A   | 0,401366113  | 0,67181667   | -0,27045056 |  |
| 240594_at    | -         | 0,401366113  | 0,67181667   | -0,27045056 |  |
| 1554140_at   | WDR78     | -1,812418401 | -1,541908042 | -0,27051036 |  |
| 1556837_a_at | -         | -1,812418401 | -1,541908042 | -0,27051036 |  |
| 1560872_at   | -         | -1,812418401 | -1,541908042 | -0,27051036 |  |
| 1562724_at   | LOC286114 | -1,812418401 | -1,541908042 | -0,27051036 |  |
| 1563051_at   | OSBP      | -1,812418401 | -1,541908042 | -0,27051036 |  |
| 1563360_at   | -         | -1,812418401 | -1,541908042 | -0,27051036 |  |
| 205933_at    | SETBP1    | -1,812418401 | -1,541908042 | -0,27051036 |  |
| 206161_s_at  | SYT5      | -1,812418401 | -1,541908042 | -0,27051036 |  |
| 207711_at    | SOGA1     | -1,812418401 | -1,541908042 | -0,27051036 |  |
| 210505_at    | ADH7      | -1,812418401 | -1,541908042 | -0,27051036 |  |
| 219836_at    | ZBED2     | -1,812418401 | -1,541908042 | -0,27051036 |  |
| 220903_at    | GFM1      | -1,812418401 | -1,541908042 | -0,27051036 |  |
| 222286_at    | SNAPC3    | -1,812418401 | -1,541908042 | -0,27051036 |  |
| 232047_at    | -         | -1,812418401 | -1,541908042 | -0,27051036 |  |
| 232951_at    | -         | -1,812418401 | -1,541908042 | -0,27051036 |  |
| 233981_at    | -         | -1,812418401 | -1,541908042 | -0,27051036 |  |
| 236556_s_at  | LONRF1    | -1,812418401 | -1,541908042 | -0,27051036 |  |
| 237538_at    | -         | -1,812418401 | -1,541908042 | -0,27051036 |  |
| 243191_at    | -         | -1,812418401 | -1,541908042 | -0,27051036 |  |
| 243526_at    | WDR86     | -1,812418401 | -1,541908042 | -0,27051036 |  |
| 244755_at    | XPR1      | -1,812418401 | -1,541908042 | -0,27051036 |  |
| 241955_at    | HECTD1    | 1,079110292  | 1,349621332  | -0,27051104 |  |
| 216350_s_at  | ZNF10     | 0,123193849  | 0,393761504  | -0,27056765 |  |
| 244326_at    | -         | 0,123193849  | 0,393761504  | -0,27056765 |  |
| 1562997_a_at | -         | -3,448416261 | -3,177802286 | -0,27061397 |  |
| 1565657_at   | CMTM6     | -3,448416261 | -3,177802286 | -0,27061397 |  |
| 201860_s_at  | PLAT      | 2,764969948  | 3,035599287  | -0,27062934 |  |
| 226410_at    | CTU2      | 2,009141686  | 2,27978304   | -0,27064135 |  |
| 215075_s_at  | GRB2      | 2,371846398  | 2,64270545   | -0,27085905 |  |
| 206763_at    | FKBP6     | -0,467091869 | -0,19610998  | -0,27098189 |  |
| 222058_at    | RNF130    | -0,467091869 | -0,19610998  | -0,27098189 |  |
| 236528_at    | -         | -0,467091869 | -0,19610998  | -0,27098189 |  |
| 241361_at    | -         | -0,467091869 | -0,19610998  | -0,27098189 |  |
| 227071_at    | ZNF414    | 0,246434561  | 0,51742585   | -0,27099129 |  |
| 228574_at    | TMTC2     | 0,246434561  | 0,51742585   | -0,27099129 |  |
| 232018_at    | LENG1     | 0,246434561  | 0,51742585   | -0,27099129 |  |
| 210226_at    | NR4A1     | 1,05337236   | 1,324440845  | -0,27106849 |  |
| 229733_s_at  | -         | 1,05337236   | 1,324440845  | -0,27106849 |  |
| 203266_s_at  | MAP2K4    | 2,59162628   | 2,862725455  | -0,27109918 |  |
| 221820_s_at  | KAT8      | 3,319065909  | 3,590171466  | -0,27110556 |  |
| 212784_at    | CIC       | 1,360921491  | 1,632095957  | -0,27117447 |  |
| 235234_at    | PATL1     | 1,360921491  | 1,632095957  | -0,27117447 |  |
| 210013_at    | HPX       | 0,882651021  | 1,153866761  | -0,27121574 |  |
| 242138_at    | DLX1      | 2,254767157  | 2,526063925  | -0,27129677 |  |
| 235980_at    | PIK3CA    | 0,533835206  | 0,805216064  | -0,27138086 |  |
| 1562062_at   | -         | 1,659347917  | 1,930732138  | -0,27138422 |  |
| 211433_x_at  | FAM214B   | 1,139070151  | 1,410714371  | -0,27164422 |  |

|              |                |              |              |             |  |
|--------------|----------------|--------------|--------------|-------------|--|
| 1552729_at   | SNHG7 /// SNOR | 0,46522187   | 0,73688026   | -0,27165839 |  |
| 209545_s_at  | RIPK2          | 2,701760055  | 2,973511251  | -0,2717512  |  |
| 226349_at    | C12orf45       | 2,59519831   | 2,867091644  | -0,27189333 |  |
| 242837_at    | SRSF4          | 1,446464021  | 1,718396606  | -0,27193259 |  |
| 227555_s_at  | KHSRP          | -0,022466681 | 0,249604176  | -0,27207086 |  |
| 202385_s_at  | TCOF1          | 2,436992838  | 2,709065209  | -0,27207237 |  |
| 228333_at    | ZEB2           | 1,699726954  | 1,971855016  | -0,27212806 |  |
| 1559003_a_at | CCDC163P       | 0,728550685  | 1,000684521  | -0,27213384 |  |
| 222698_s_at  | IMPACT         | 1,81142822   | 2,083632167  | -0,27220395 |  |
| 224645_at    | EIF4EBP2       | 1,81142822   | 2,083632167  | -0,27220395 |  |
| 206419_at    | RORC           | 0,496120222  | 0,768343791  | -0,27222357 |  |
| 214298_x_at  | 38961          | 0,496120222  | 0,768343791  | -0,27222357 |  |
| 230082_at    | -              | 0,496120222  | 0,768343791  | -0,27222357 |  |
| 235804_at    | -              | 0,496120222  | 0,768343791  | -0,27222357 |  |
| 46142_at     | LMF1           | -2,33134898  | -2,059099632 | -0,27224935 |  |
| 211091_s_at  | NF2            | 0,317354302  | 0,589657387  | -0,27230309 |  |
| 205598_at    | TRAIP          | 0,592200562  | 0,864649967  | -0,27244941 |  |
| 228266_s_at  | HDGFRP3        | 0,592200562  | 0,864649967  | -0,27244941 |  |
| 229131_at    | EXD2           | 0,592200562  | 0,864649967  | -0,27244941 |  |
| 1553633_s_at | SLC9B1         | -2,359436556 | -2,086984744 | -0,27245181 |  |
| 1553986_at   | RASEF          | -2,359436556 | -2,086984744 | -0,27245181 |  |
| 1554999_at   | RASGEF1B       | -2,359436556 | -2,086984744 | -0,27245181 |  |
| 1557430_at   | LOC147670      | -2,359436556 | -2,086984744 | -0,27245181 |  |
| 1559543_at   | LINC00441      | -2,359436556 | -2,086984744 | -0,27245181 |  |
| 1569938_at   | SIRT5          | -2,359436556 | -2,086984744 | -0,27245181 |  |
| 1570505_at   | ABCB4          | -2,359436556 | -2,086984744 | -0,27245181 |  |
| 201062_at    | STOM           | -2,359436556 | -2,086984744 | -0,27245181 |  |
| 202563_at    | C14orf1        | -2,359436556 | -2,086984744 | -0,27245181 |  |
| 210928_at    | -              | -2,359436556 | -2,086984744 | -0,27245181 |  |
| 211104_s_at  | MYO7A          | -2,359436556 | -2,086984744 | -0,27245181 |  |
| 211753_s_at  | RLN1           | -2,359436556 | -2,086984744 | -0,27245181 |  |
| 220835_s_at  | ZNF407         | -2,359436556 | -2,086984744 | -0,27245181 |  |
| 221337_s_at  | ADAM29         | -2,359436556 | -2,086984744 | -0,27245181 |  |
| 227289_at    | PCDH17         | -2,359436556 | -2,086984744 | -0,27245181 |  |
| 228082_at    | CLMP           | -2,359436556 | -2,086984744 | -0,27245181 |  |
| 233264_at    | -              | -2,359436556 | -2,086984744 | -0,27245181 |  |
| 233448_s_at  | -              | -2,359436556 | -2,086984744 | -0,27245181 |  |
| 234090_at    | -              | -2,359436556 | -2,086984744 | -0,27245181 |  |
| 234196_at    | -              | -2,359436556 | -2,086984744 | -0,27245181 |  |
| 236130_at    | SNORA37        | -2,359436556 | -2,086984744 | -0,27245181 |  |
| 236374_at    | CTXN3          | -2,359436556 | -2,086984744 | -0,27245181 |  |
| 237427_at    | -              | -2,359436556 | -2,086984744 | -0,27245181 |  |
| 240569_at    | -              | -2,359436556 | -2,086984744 | -0,27245181 |  |
| 241497_at    | -              | -2,359436556 | -2,086984744 | -0,27245181 |  |
| 241914_s_at  | ACSM2A /// ACS | -2,359436556 | -2,086984744 | -0,27245181 |  |
| 242570_at    | -              | -2,359436556 | -2,086984744 | -0,27245181 |  |
| 243673_at    | -              | -2,359436556 | -2,086984744 | -0,27245181 |  |
| 235493_at    | -              | 1,021868205  | 1,294497133  | -0,27262893 |  |
| 220036_s_at  | LMBR1L         | 1,352503698  | 1,6252386    | -0,2727349  |  |
| 211541_s_at  | DYRK1A         | 0,767063567  | 1,039887232  | -0,27282366 |  |
| 1553695_a_at | NLRX1          | 0,020670649  | 0,293518836  | -0,27284819 |  |
| 1554396_at   | UEVLD          | 0,020670649  | 0,293518836  | -0,27284819 |  |
| 214549_x_at  | SPRR1A         | 0,020670649  | 0,293518836  | -0,27284819 |  |
| 217159_x_at  | SIGLEC7        | 0,020670649  | 0,293518836  | -0,27284819 |  |
| 225700_at    | GLCC11         | 0,020670649  | 0,293518836  | -0,27284819 |  |
| 237826_at    | -              | 0,020670649  | 0,293518836  | -0,27284819 |  |

|              |                   |              |              |             |  |
|--------------|-------------------|--------------|--------------|-------------|--|
| 209528_s_at  | TELO2             | 0,97328325   | 1,246149888  | -0,27286664 |  |
| 216730_at    | -                 | 0,351548291  | 0,624460759  | -0,27291247 |  |
| 215338_s_at  | NKTR              | 1,369290453  | 1,642321262  | -0,27303081 |  |
| 1556781_at   | -                 | -1,888254346 | -1,615132408 | -0,27312194 |  |
| 1557224_at   | -                 | -1,888254346 | -1,615132408 | -0,27312194 |  |
| 1566693_at   | -                 | -1,888254346 | -1,615132408 | -0,27312194 |  |
| 1569688_at   | FMO5              | -1,888254346 | -1,615132408 | -0,27312194 |  |
| 1570344_at   | -                 | -1,888254346 | -1,615132408 | -0,27312194 |  |
| 204445_s_at  | ALOX5             | -1,888254346 | -1,615132408 | -0,27312194 |  |
| 206460_at    | AJAP1             | -1,888254346 | -1,615132408 | -0,27312194 |  |
| 209230_s_at  | NUPR1             | -1,888254346 | -1,615132408 | -0,27312194 |  |
| 215041_s_at  | DOCK9             | -1,888254346 | -1,615132408 | -0,27312194 |  |
| 215363_x_at  | FOLH1 /// FOLH1   | -1,888254346 | -1,615132408 | -0,27312194 |  |
| 216160_at    | -                 | -1,888254346 | -1,615132408 | -0,27312194 |  |
| 222596_s_at  | LGR4              | -1,888254346 | -1,615132408 | -0,27312194 |  |
| 224124_at    | ZRANB3            | -1,888254346 | -1,615132408 | -0,27312194 |  |
| 228616_at    | POLRMTP1          | -1,888254346 | -1,615132408 | -0,27312194 |  |
| 232917_at    | -                 | -1,888254346 | -1,615132408 | -0,27312194 |  |
| 234667_at    | -                 | -1,888254346 | -1,615132408 | -0,27312194 |  |
| 235763_at    | SLC44A5           | -1,888254346 | -1,615132408 | -0,27312194 |  |
| 237396_at    | -                 | -1,888254346 | -1,615132408 | -0,27312194 |  |
| 238336_s_at  | DNAJC21           | -1,888254346 | -1,615132408 | -0,27312194 |  |
| 240804_at    | -                 | -1,888254346 | -1,615132408 | -0,27312194 |  |
| 202394_s_at  | ABCF3             | 1,649074067  | 1,922365006  | -0,27329094 |  |
| 1555907_at   | LOC100130776      | -0,622910612 | -0,34958478  | -0,27332583 |  |
| 1561336_at   | DNASE1L3          | -0,622910612 | -0,34958478  | -0,27332583 |  |
| 200906_s_at  | PALLD             | -0,622910612 | -0,34958478  | -0,27332583 |  |
| 227302_s_at  | FLII /// LLGL1    | -0,622910612 | -0,34958478  | -0,27332583 |  |
| 230167_at    | ADAMTS14          | -0,622910612 | -0,34958478  | -0,27332583 |  |
| 239243_at    | ZNF638            | -0,622910612 | -0,34958478  | -0,27332583 |  |
| 204820_s_at  | BTN3A2 /// BTN3A2 | 3,648798054  | 3,922140371  | -0,27334232 |  |
| 222993_at    | MRPL37            | 4,032172063  | 4,305575871  | -0,27340381 |  |
| 224265_s_at  | ZAN               | -0,352951799 | -0,079522948 | -0,27342885 |  |
| 243266_at    | -                 | -0,352951799 | -0,079522948 | -0,27342885 |  |
| 202480_s_at  | DEDD              | 0,648296226  | 0,921731975  | -0,27343575 |  |
| 218121_at    | HMOX2             | 0,648296226  | 0,921731975  | -0,27343575 |  |
| 228713_s_at  | HSD17B14          | 0,648296226  | 0,921731975  | -0,27343575 |  |
| 229892_at    | EP400NL           | 0,648296226  | 0,921731975  | -0,27343575 |  |
| 210223_s_at  | MR1               | 0,384950573  | 0,658444279  | -0,27349371 |  |
| 208583_x_at  | HIST1H2AJ         | 3,869867201  | 4,143455947  | -0,27358875 |  |
| 214649_s_at  | MTMR2             | 2,713311265  | 2,986947093  | -0,27363583 |  |
| 1556209_at   | CLEC2B            | -2,311268652 | -2,037551727 | -0,27371693 |  |
| 1561554_at   | -                 | -2,311268652 | -2,037551727 | -0,27371693 |  |
| 1568713_a_at | TBC1D1            | -2,311268652 | -2,037551727 | -0,27371693 |  |
| 1569736_at   | -                 | -2,311268652 | -2,037551727 | -0,27371693 |  |
| 211964_at    | COL4A2            | -2,311268652 | -2,037551727 | -0,27371693 |  |
| 214111_at    | OPCML             | -2,311268652 | -2,037551727 | -0,27371693 |  |
| 214604_at    | HOXD11            | -2,311268652 | -2,037551727 | -0,27371693 |  |
| 214647_s_at  | HFE               | -2,311268652 | -2,037551727 | -0,27371693 |  |
| 217332_at    | CTAGE11P          | -2,311268652 | -2,037551727 | -0,27371693 |  |
| 220817_at    | TRPC4             | -2,311268652 | -2,037551727 | -0,27371693 |  |
| 231654_s_at  | -                 | -2,311268652 | -2,037551727 | -0,27371693 |  |
| 241121_at    | LOC100505928      | -2,311268652 | -2,037551727 | -0,27371693 |  |
| 241553_at    | GSG1              | -2,311268652 | -2,037551727 | -0,27371693 |  |
| 243005_at    | -                 | -2,311268652 | -2,037551727 | -0,27371693 |  |
| 243426_at    | LOC339290         | -2,311268652 | -2,037551727 | -0,27371693 |  |

|              |                  |              |              |             |  |
|--------------|------------------|--------------|--------------|-------------|--|
| 243472_at    | -                | -2,311268652 | -2,037551727 | -0,27371693 |  |
| 244769_at    | FLJ33630         | -2,311268652 | -2,037551727 | -0,27371693 |  |
| 208686_s_at  | BRD2             | 2,683419202  | 2,957221307  | -0,27380211 |  |
| 202713_s_at  | KIAA0391         | 3,423218668  | 3,697038015  | -0,27381935 |  |
| 33850_at     | MAP4             | 0,754339833  | 1,028237864  | -0,27389803 |  |
| 224357_s_at  | MS4A4A           | 0,67554678   | 0,949447784  | -0,273901   |  |
| 1552365_at   | SCIN             | -3,054236653 | -2,780313924 | -0,27392273 |  |
| 1559206_at   | PSEN1            | -3,054236653 | -2,780313924 | -0,27392273 |  |
| 215086_at    | IBTK             | -3,054236653 | -2,780313924 | -0,27392273 |  |
| 224024_at    | ERGIC1           | -3,054236653 | -2,780313924 | -0,27392273 |  |
| 233170_at    | LINC00348        | -3,054236653 | -2,780313924 | -0,27392273 |  |
| 237100_at    | -                | -3,054236653 | -2,780313924 | -0,27392273 |  |
| 240341_at    | -                | -3,054236653 | -2,780313924 | -0,27392273 |  |
| 243644_at    | -                | -3,054236653 | -2,780313924 | -0,27392273 |  |
| 244247_at    | -                | -3,054236653 | -2,780313924 | -0,27392273 |  |
| 1559227_s_at | VHL              | 0,417596971  | 0,691645685  | -0,27404871 |  |
| 229190_at    | LOC100507376     | 0,417596971  | 0,691645685  | -0,27404871 |  |
| 213045_at    | MAST3            | 0,841135803  | 1,115234684  | -0,27409888 |  |
| 232148_at    | NSMAF            | 0,841135803  | 1,115234684  | -0,27409888 |  |
| 207861_at    | CCL22            | -0,888496123 | -0,614371577 | -0,27412455 |  |
| 210263_at    | KCNF1            | -0,888496123 | -0,614371577 | -0,27412455 |  |
| 215502_at    | -                | -0,888496123 | -0,614371577 | -0,27412455 |  |
| 217166_at    | -                | -0,888496123 | -0,614371577 | -0,27412455 |  |
| 238167_at    | C17orf51 /// FAM | -0,888496123 | -0,614371577 | -0,27412455 |  |
| 238174_at    | -                | -0,888496123 | -0,614371577 | -0,27412455 |  |
| 243540_at    | -                | -0,888496123 | -0,614371577 | -0,27412455 |  |
| 214879_x_at  | USF2             | 3,120200849  | 3,394350331  | -0,27414948 |  |
| 1557953_at   | ZKSCAN1          | 0,917308734  | 1,191491281  | -0,27418255 |  |
| 219372_at    | IFT81            | 1,485482016  | 1,759685182  | -0,27420317 |  |
| 1564713_a_at | FOXN4            | 0,103263601  | 0,377530647  | -0,27426705 |  |
| 202079_s_at  | TRAK1            | 0,103263601  | 0,377530647  | -0,27426705 |  |
| 1559601_at   | KIAA2018         | -1,937711681 | -1,663414495 | -0,27429719 |  |
| 1562102_at   | -                | -1,937711681 | -1,663414495 | -0,27429719 |  |
| 1563590_at   | -                | -1,937711681 | -1,663414495 | -0,27429719 |  |
| 207167_at    | CD101            | -1,937711681 | -1,663414495 | -0,27429719 |  |
| 209722_s_at  | SERPINB9         | -1,937711681 | -1,663414495 | -0,27429719 |  |
| 213354_s_at  | NR2F6            | -1,937711681 | -1,663414495 | -0,27429719 |  |
| 213928_s_at  | AGFG1            | -1,937711681 | -1,663414495 | -0,27429719 |  |
| 215518_at    | STXBP5L          | -1,937711681 | -1,663414495 | -0,27429719 |  |
| 222189_at    | -                | -1,937711681 | -1,663414495 | -0,27429719 |  |
| 222973_at    | -                | -1,937711681 | -1,663414495 | -0,27429719 |  |
| 229994_at    | NFIA             | -1,937711681 | -1,663414495 | -0,27429719 |  |
| 230506_at    | C6orf164         | -1,937711681 | -1,663414495 | -0,27429719 |  |
| 235811_at    | -                | -1,937711681 | -1,663414495 | -0,27429719 |  |
| 240610_at    | LOC100507193     | -1,937711681 | -1,663414495 | -0,27429719 |  |
| 242142_at    | -                | -1,937711681 | -1,663414495 | -0,27429719 |  |
| 244109_at    | WDR38            | -1,937711681 | -1,663414495 | -0,27429719 |  |
| 1556271_at   | -                | -1,2845686   | -1,010192375 | -0,27437623 |  |
| 209693_at    | ASTN2            | -1,2845686   | -1,010192375 | -0,27437623 |  |
| 216355_at    | PCDHB17          | -1,2845686   | -1,010192375 | -0,27437623 |  |
| 226333_at    | IL6R             | -1,2845686   | -1,010192375 | -0,27437623 |  |
| 229223_at    | -                | -1,2845686   | -1,010192375 | -0,27437623 |  |
| 235719_at    | CYP4V2           | -1,2845686   | -1,010192375 | -0,27437623 |  |
| 237616_at    | -                | -1,2845686   | -1,010192375 | -0,27437623 |  |
| 238319_at    | LOC644090        | -1,2845686   | -1,010192375 | -0,27437623 |  |
| 240870_at    | -                | -1,2845686   | -1,010192375 | -0,27437623 |  |



|              |                  |              |              |             |  |
|--------------|------------------|--------------|--------------|-------------|--|
| 241597_at    | -                | -1,2845686   | -1,010192375 | -0,27437623 |  |
| 243672_at    | SALL3            | -1,2845686   | -1,010192375 | -0,27437623 |  |
| 206966_s_at  | KLF12            | -0,299034815 | -0,024572586 | -0,27446223 |  |
| 227315_x_at  | PROSC            | -0,299034815 | -0,024572586 | -0,27446223 |  |
| 240315_at    | -                | -0,299034815 | -0,024572586 | -0,27446223 |  |
| 228443_s_at  | SETD8            | 2,825526235  | 3,100079607  | -0,27455337 |  |
| 217762_s_at  | RAB31            | 4,10413628   | 4,378751229  | -0,27461495 |  |
| 226855_at    | PDP2             | 1,951783949  | 2,226407528  | -0,27462358 |  |
| 203321_s_at  | ADNP2            | 2,236584753  | 2,511262629  | -0,27467788 |  |
| 219807_x_at  | MIA-RAB4B /// R  | 1,515954005  | 1,790660532  | -0,27470653 |  |
| 202423_at    | KAT6A            | 3,154500615  | 3,429217209  | -0,27471659 |  |
| 1560885_x_at | SLC17A1          | -3,41365796  | -3,138626879 | -0,27503108 |  |
| 242344_at    | GABRB2           | -3,41365796  | -3,138626879 | -0,27503108 |  |
| 204506_at    | PPP3R1           | 4,40564134   | 4,68068829   | -0,27504695 |  |
| 244766_at    | 61E3.4 /// LOC10 | 0,480753764  | 0,755840599  | -0,27508684 |  |
| 212316_at    | NUP210           | 1,339784194  | 1,614891062  | -0,27510687 |  |
| 1552482_at   | RAPH1            | -2,236765673 | -1,961547147 | -0,27521853 |  |
| 1554302_s_at | LHFPL3-AS1       | -2,236765673 | -1,961547147 | -0,27521853 |  |
| 1556402_at   | -                | -2,236765673 | -1,961547147 | -0,27521853 |  |
| 1562010_x_at | -                | -2,236765673 | -1,961547147 | -0,27521853 |  |
| 1566209_at   | -                | -2,236765673 | -1,961547147 | -0,27521853 |  |
| 1569516_at   | -                | -2,236765673 | -1,961547147 | -0,27521853 |  |
| 1570314_at   | -                | -2,236765673 | -1,961547147 | -0,27521853 |  |
| 203813_s_at  | SLIT3            | -2,236765673 | -1,961547147 | -0,27521853 |  |
| 212599_at    | AUTS2            | -2,236765673 | -1,961547147 | -0,27521853 |  |
| 213397_x_at  | RNASE4           | -2,236765673 | -1,961547147 | -0,27521853 |  |
| 220957_at    | CTAGE1           | -2,236765673 | -1,961547147 | -0,27521853 |  |
| 222134_at    | DDO              | -2,236765673 | -1,961547147 | -0,27521853 |  |
| 231410_at    | -                | -2,236765673 | -1,961547147 | -0,27521853 |  |
| 231594_at    | -                | -2,236765673 | -1,961547147 | -0,27521853 |  |
| 234541_s_at  | ARHGEF12         | -2,236765673 | -1,961547147 | -0,27521853 |  |
| 236154_at    | QKI              | -2,236765673 | -1,961547147 | -0,27521853 |  |
| 237410_x_at  | -                | -2,236765673 | -1,961547147 | -0,27521853 |  |
| 237617_at    | LOC100506675     | -2,236765673 | -1,961547147 | -0,27521853 |  |
| 243019_at    | LOC100132207     | -2,236765673 | -1,961547147 | -0,27521853 |  |
| 243490_at    | -                | -2,236765673 | -1,961547147 | -0,27521853 |  |
| 244075_at    | -                | -2,236765673 | -1,961547147 | -0,27521853 |  |
| 244584_at    | C11orf41         | -2,236765673 | -1,961547147 | -0,27521853 |  |
| 244671_at    | -                | -2,236765673 | -1,961547147 | -0,27521853 |  |
| 201818_at    | LPCAT1           | 2,553576109  | 2,828804976  | -0,27522887 |  |
| 200814_at    | PSME1            | 4,820071768  | 5,095335715  | -0,27526395 |  |
| 225364_at    | STK4             | 3,61576656   | 3,891034012  | -0,27526745 |  |
| 1557610_at   | LOC100507034     | -1,131062212 | -0,855751026 | -0,27531119 |  |
| 210393_at    | LGR5             | -1,131062212 | -0,855751026 | -0,27531119 |  |
| 216018_at    | RNF5             | -1,131062212 | -0,855751026 | -0,27531119 |  |
| 216507_at    | TAPT1            | -1,131062212 | -0,855751026 | -0,27531119 |  |
| 234936_s_at  | CC2D2A           | -1,131062212 | -0,855751026 | -0,27531119 |  |
| 236468_at    | TMEM132B         | -1,131062212 | -0,855751026 | -0,27531119 |  |
| 236873_at    | -                | -1,131062212 | -0,855751026 | -0,27531119 |  |
| 239341_at    | -                | -1,131062212 | -0,855751026 | -0,27531119 |  |
| 241504_at    | LOC100506047     | -1,131062212 | -0,855751026 | -0,27531119 |  |
| 242176_at    | MEF2A            | -1,131062212 | -0,855751026 | -0,27531119 |  |
| 243029_at    | KREMEN1          | -1,131062212 | -0,855751026 | -0,27531119 |  |
| 204970_s_at  | MAFG             | 2,097427503  | 2,372786857  | -0,27535935 |  |
| 244623_at    | KCNQ5            | 0,181384709  | 0,456918297  | -0,27553359 |  |
| 200791_s_at  | IQGAP1           | 3,000043914  | 3,275657468  | -0,27561355 |  |

|              |              |              |              |             |  |
|--------------|--------------|--------------|--------------|-------------|--|
| 213441_x_at  | SPDEF        | 1,073999308  | 1,349621332  | -0,27562202 |  |
| 1554844_at   | EYA3         | -2,01371626  | -1,738067356 | -0,2756489  |  |
| 1555603_at   | BAGE         | -2,01371626  | -1,738067356 | -0,2756489  |  |
| 1560507_at   | AWAT1        | -2,01371626  | -1,738067356 | -0,2756489  |  |
| 204364_s_at  | REEP1        | -2,01371626  | -1,738067356 | -0,2756489  |  |
| 210287_s_at  | FLT1         | -2,01371626  | -1,738067356 | -0,2756489  |  |
| 211153_s_at  | TNFSF11      | -2,01371626  | -1,738067356 | -0,2756489  |  |
| 219454_at    | EGFL6        | -2,01371626  | -1,738067356 | -0,2756489  |  |
| 220868_s_at  | SLC7A10      | -2,01371626  | -1,738067356 | -0,2756489  |  |
| 228657_at    | KIF1B        | -2,01371626  | -1,738067356 | -0,2756489  |  |
| 229540_at    | RBPJ         | -2,01371626  | -1,738067356 | -0,2756489  |  |
| 231795_at    | STON1        | -2,01371626  | -1,738067356 | -0,2756489  |  |
| 233477_at    | KLK15        | -2,01371626  | -1,738067356 | -0,2756489  |  |
| 234463_at    | -            | -2,01371626  | -1,738067356 | -0,2756489  |  |
| 238213_at    | MIR5188      | -2,01371626  | -1,738067356 | -0,2756489  |  |
| 238832_at    | KLHL34       | -2,01371626  | -1,738067356 | -0,2756489  |  |
| 239732_x_at  | FAM47C       | -2,01371626  | -1,738067356 | -0,2756489  |  |
| 201620_at    | MBTPS1       | 2,582657321  | 2,858346012  | -0,27568869 |  |
| 1558990_at   | C18orf21     | -2,779459409 | -2,503677622 | -0,27578179 |  |
| 1559420_x_at | CACNB2       | -2,779459409 | -2,503677622 | -0,27578179 |  |
| 1559895_x_at | -            | -2,779459409 | -2,503677622 | -0,27578179 |  |
| 1561205_at   | -            | -2,779459409 | -2,503677622 | -0,27578179 |  |
| 1561861_a_at | -            | -2,779459409 | -2,503677622 | -0,27578179 |  |
| 1562573_at   | CYP17A1      | -2,779459409 | -2,503677622 | -0,27578179 |  |
| 1563097_at   | DNAH12       | -2,779459409 | -2,503677622 | -0,27578179 |  |
| 1568648_a_at | LOC100505851 | -2,779459409 | -2,503677622 | -0,27578179 |  |
| 207324_s_at  | DSC1         | -2,779459409 | -2,503677622 | -0,27578179 |  |
| 209290_s_at  | NFIB         | -2,779459409 | -2,503677622 | -0,27578179 |  |
| 216896_at    | COL4A3       | -2,779459409 | -2,503677622 | -0,27578179 |  |
| 234847_at    | LINC00309    | -2,779459409 | -2,503677622 | -0,27578179 |  |
| 235454_at    | -            | -2,779459409 | -2,503677622 | -0,27578179 |  |
| 235622_at    | -            | -2,779459409 | -2,503677622 | -0,27578179 |  |
| 236733_at    | -            | -2,779459409 | -2,503677622 | -0,27578179 |  |
| 240133_x_at  | -            | -2,779459409 | -2,503677622 | -0,27578179 |  |
| 240951_at    | RORA         | -2,779459409 | -2,503677622 | -0,27578179 |  |
| 240972_at    | -            | -2,779459409 | -2,503677622 | -0,27578179 |  |
| 242102_at    | DIAPH3-AS1   | -2,779459409 | -2,503677622 | -0,27578179 |  |
| 243666_at    | -            | -2,779459409 | -2,503677622 | -0,27578179 |  |
| 1556518_at   | DLG1-AS1     | -2,187914861 | -1,912089812 | -0,27582505 |  |
| 1556847_s_at | -            | -2,187914861 | -1,912089812 | -0,27582505 |  |
| 1556859_a_at | LOC285740    | -2,187914861 | -1,912089812 | -0,27582505 |  |
| 1568874_at   | NCOA6        | -2,187914861 | -1,912089812 | -0,27582505 |  |
| 204850_s_at  | DCX          | -2,187914861 | -1,912089812 | -0,27582505 |  |
| 207012_at    | MMP16        | -2,187914861 | -1,912089812 | -0,27582505 |  |
| 222535_at    | INF2         | -2,187914861 | -1,912089812 | -0,27582505 |  |
| 233134_at    | RPH3AL       | -2,187914861 | -1,912089812 | -0,27582505 |  |
| 233504_at    | C9orf84      | -2,187914861 | -1,912089812 | -0,27582505 |  |
| 234326_at    | -            | -2,187914861 | -1,912089812 | -0,27582505 |  |
| 238097_at    | GAS6-AS1     | -2,187914861 | -1,912089812 | -0,27582505 |  |
| 238198_at    | -            | -2,187914861 | -1,912089812 | -0,27582505 |  |
| 238659_at    | KIAA0141     | -2,187914861 | -1,912089812 | -0,27582505 |  |
| 243306_s_at  | GCC1         | -2,187914861 | -1,912089812 | -0,27582505 |  |
| 202809_s_at  | INTS3        | 1,764611101  | 2,040470494  | -0,27585939 |  |
| 1557047_at   | YEATS2       | 1,722769813  | 1,998633167  | -0,27586335 |  |
| 231078_at    | SLC25A37     | 1,094335495  | 1,370274469  | -0,27593897 |  |
| 201932_at    | LRRC41       | 1,932146506  | 2,208167653  | -0,27602115 |  |

|              |                  |              |              |             |  |
|--------------|------------------|--------------|--------------|-------------|--|
| 1558570_at   | LOC145783        | -2,063149277 | -1,787089803 | -0,27605947 |  |
| 204153_s_at  | MFNG             | -2,063149277 | -1,787089803 | -0,27605947 |  |
| 210095_s_at  | IGFBP3           | -2,063149277 | -1,787089803 | -0,27605947 |  |
| 216644_at    | -                | -2,063149277 | -1,787089803 | -0,27605947 |  |
| 223699_at    | CNDP1            | -2,063149277 | -1,787089803 | -0,27605947 |  |
| 230657_at    | -                | -2,063149277 | -1,787089803 | -0,27605947 |  |
| 232348_at    | C18orf8          | -2,063149277 | -1,787089803 | -0,27605947 |  |
| 234266_at    | -                | -2,063149277 | -1,787089803 | -0,27605947 |  |
| 234550_at    | -                | -2,063149277 | -1,787089803 | -0,27605947 |  |
| 234970_at    | TC2N             | -2,063149277 | -1,787089803 | -0,27605947 |  |
| 236362_at    | -                | -2,063149277 | -1,787089803 | -0,27605947 |  |
| 238717_at    | -                | -2,063149277 | -1,787089803 | -0,27605947 |  |
| 235222_x_at  | XIAP             | 1,603688695  | 1,879785595  | -0,2760969  |  |
| 201280_s_at  | DAB2             | 2,721505869  | 2,997606395  | -0,27610053 |  |
| 1561688_at   | -                | -2,138804305 | -1,862647763 | -0,27615654 |  |
| 1562308_at   | LOC283682        | -2,138804305 | -1,862647763 | -0,27615654 |  |
| 1563208_s_at | C3orf65          | -2,138804305 | -1,862647763 | -0,27615654 |  |
| 1565585_at   | -                | -2,138804305 | -1,862647763 | -0,27615654 |  |
| 204013_s_at  | LCMT2            | -2,138804305 | -1,862647763 | -0,27615654 |  |
| 207762_at    | LPAL2            | -2,138804305 | -1,862647763 | -0,27615654 |  |
| 208207_at    | -                | -2,138804305 | -1,862647763 | -0,27615654 |  |
| 228514_at    | GFER             | -2,138804305 | -1,862647763 | -0,27615654 |  |
| 230170_at    | OSM              | -2,138804305 | -1,862647763 | -0,27615654 |  |
| 231568_at    | CT47A1 /// CT47  | -2,138804305 | -1,862647763 | -0,27615654 |  |
| 233125_at    | -                | -2,138804305 | -1,862647763 | -0,27615654 |  |
| 233338_at    | LINC00281 /// LC | -2,138804305 | -1,862647763 | -0,27615654 |  |
| 235538_at    | -                | -2,138804305 | -1,862647763 | -0,27615654 |  |
| 236348_at    | TMEM176B         | -2,138804305 | -1,862647763 | -0,27615654 |  |
| 239491_at    | CERS5            | -2,138804305 | -1,862647763 | -0,27615654 |  |
| 240402_at    | KIRREL3          | -2,138804305 | -1,862647763 | -0,27615654 |  |
| 241465_at    | -                | -2,138804305 | -1,862647763 | -0,27615654 |  |
| 241654_at    | -                | -2,138804305 | -1,862647763 | -0,27615654 |  |
| 241788_x_at  | -                | -2,138804305 | -1,862647763 | -0,27615654 |  |
| 243658_at    | -                | -2,138804305 | -1,862647763 | -0,27615654 |  |
| 1565483_at   | EGFR             | -0,196756757 | 0,079428135  | -0,27618489 |  |
| 1569911_at   | -                | -0,196756757 | 0,079428135  | -0,27618489 |  |
| 220278_at    | KDM4D            | -0,196756757 | 0,079428135  | -0,27618489 |  |
| 225349_at    | ZNF496           | -0,196756757 | 0,079428135  | -0,27618489 |  |
| 241158_at    | -                | -0,196756757 | 0,079428135  | -0,27618489 |  |
| 218262_at    | RMND5B           | 1,296557217  | 1,572742379  | -0,27618516 |  |
| 226858_at    | CSNK1E           | 1,296557217  | 1,572742379  | -0,27618516 |  |
| 227327_at    | MEGF8            | 1,789769151  | 2,066015817  | -0,27624667 |  |
| 213897_s_at  | MRPL23           | 3,702775533  | 3,979052747  | -0,27627721 |  |
| 209882_at    | RIT1             | 2,314494121  | 2,590852465  | -0,27635834 |  |
| 215269_at    | TRAPPC10         | 1,954567604  | 2,230931691  | -0,27636409 |  |
| 226499_at    | NRARP            | 1,954567604  | 2,230931691  | -0,27636409 |  |
| 201836_s_at  | SUPT7L           | 1,473887017  | 1,750261389  | -0,27637437 |  |
| 1569852_at   | C7orf53          | -0,496991414 | -0,220592223 | -0,27639919 |  |
| 207953_at    | -                | -0,496991414 | -0,220592223 | -0,27639919 |  |
| 210671_x_at  | MAPK8            | -0,496991414 | -0,220592223 | -0,27639919 |  |
| 237337_at    | -                | -0,496991414 | -0,220592223 | -0,27639919 |  |
| 242149_at    | FAM210A          | 0,57058931   | 0,847075464  | -0,27648615 |  |
| 200956_s_at  | SSRP1            | 3,904829675  | 4,181349409  | -0,27651973 |  |
| 210358_x_at  | GATA2            | 1,631786706  | 1,908311039  | -0,27652433 |  |
| 224749_at    | ITFG3            | 1,631786706  | 1,908311039  | -0,27652433 |  |
| 204958_at    | PLK3             | 0,255492549  | 0,532164371  | -0,27667182 |  |

|              |                 |              |              |             |  |
|--------------|-----------------|--------------|--------------|-------------|--|
| 208358_s_at  | UGT8            | 0,853119696  | 1,129843209  | -0,27672351 |  |
| 206036_s_at  | REL             | -0,148196756 | 0,128747141  | -0,2769439  |  |
| 230813_at    | LEPREL1         | -0,148196756 | 0,128747141  | -0,2769439  |  |
| 231026_at    | EFHC1           | -0,148196756 | 0,128747141  | -0,2769439  |  |
| 243704_at    | GPATCH2         | -0,148196756 | 0,128747141  | -0,2769439  |  |
| 203270_at    | DTYMK           | 2,544366685  | 2,821324225  | -0,27695754 |  |
| 210028_s_at  | ORC3            | 3,870604295  | 4,147649355  | -0,27704506 |  |
| 201730_s_at  | TPR             | 2,72965419   | 3,006869115  | -0,27721493 |  |
| 213089_at    | LOC100272216    | 0,627515113  | 0,904843258  | -0,27732815 |  |
| 225935_at    | CUX1            | 0,900083947  | 1,177496821  | -0,27741287 |  |
| 207783_x_at  | HUWE1           | 6,475948816  | 6,753558289  | -0,27760947 |  |
| 1554752_a_at | -               | -0,43775896  | -0,160136748 | -0,27762221 |  |
| 203479_s_at  | OTUD4           | -0,43775896  | -0,160136748 | -0,27762221 |  |
| 216645_at    | -               | -0,43775896  | -0,160136748 | -0,27762221 |  |
| 241747_s_at  | CUL7            | -0,43775896  | -0,160136748 | -0,27762221 |  |
| 225988_at    | HERC4           | 2,220484971  | 2,498185745  | -0,27770077 |  |
| 225570_at    | SLC41A1         | 2,406821352  | 2,684536601  | -0,27771525 |  |
| 1555136_at   | FGD6            | -3,013665402 | -2,735862426 | -0,27780298 |  |
| 1556447_at   | LINC00606       | -3,013665402 | -2,735862426 | -0,27780298 |  |
| 1556757_a_at | ALS2CR11        | -3,013665402 | -2,735862426 | -0,27780298 |  |
| 1556776_a_at | -               | -3,013665402 | -2,735862426 | -0,27780298 |  |
| 1558372_at   | -               | -3,013665402 | -2,735862426 | -0,27780298 |  |
| 1558826_at   | ZNF831          | -3,013665402 | -2,735862426 | -0,27780298 |  |
| 1565920_at   | -               | -3,013665402 | -2,735862426 | -0,27780298 |  |
| 1567100_at   | -               | -3,013665402 | -2,735862426 | -0,27780298 |  |
| 1570001_at   | CASP8AP2        | -3,013665402 | -2,735862426 | -0,27780298 |  |
| 205242_at    | CXCL13          | -3,013665402 | -2,735862426 | -0,27780298 |  |
| 207481_at    | -               | -3,013665402 | -2,735862426 | -0,27780298 |  |
| 207588_at    | -               | -3,013665402 | -2,735862426 | -0,27780298 |  |
| 217697_at    | -               | -3,013665402 | -2,735862426 | -0,27780298 |  |
| 220313_at    | GPR88           | -3,013665402 | -2,735862426 | -0,27780298 |  |
| 220972_s_at  | KRTAP9-9        | -3,013665402 | -2,735862426 | -0,27780298 |  |
| 223861_at    | HORMAD1         | -3,013665402 | -2,735862426 | -0,27780298 |  |
| 232450_at    | LOC149351       | -3,013665402 | -2,735862426 | -0,27780298 |  |
| 236197_at    | -               | -3,013665402 | -2,735862426 | -0,27780298 |  |
| 241273_at    | -               | -3,013665402 | -2,735862426 | -0,27780298 |  |
| 241986_at    | BMPER           | -3,013665402 | -2,735862426 | -0,27780298 |  |
| 222420_s_at  | UBE2H           | 1,767779954  | 2,045615873  | -0,27783592 |  |
| 228328_at    | KLHL28          | 2,632180155  | 2,910041809  | -0,27786165 |  |
| 213827_at    | ARHGAP33        | 0,945567441  | 1,223626587  | -0,27805915 |  |
| 236247_at    | NSUN4           | 0,945567441  | 1,223626587  | -0,27805915 |  |
| 213130_at    | ZNF473          | 2,114952142  | 2,39311332   | -0,27816118 |  |
| 1564651_at   | C6orf228        | 0,359971644  | 0,638150376  | -0,27817873 |  |
| 202715_at    | CAD             | 3,232262672  | 3,510542997  | -0,27828032 |  |
| 225593_at    | LSM10           | 3,025418883  | 3,303845028  | -0,27842614 |  |
| 228785_at    | -               | 4,165490501  | 4,44401622   | -0,27852572 |  |
| 205190_at    | PLS1            | 1,868628927  | 2,147243253  | -0,27861433 |  |
| 223328_at    | ARMC10          | 3,704430214  | 3,983081173  | -0,27865096 |  |
| 235766_x_at  | RAB27A          | 2,001086023  | 2,27978304   | -0,27869702 |  |
| 221473_x_at  | SERINC3         | 3,51093129   | 3,789647959  | -0,27871667 |  |
| 1554242_a_at | COCH            | 3,997499421  | 4,276328567  | -0,27882915 |  |
| 221971_x_at  | AGAP10 /// AGAP | 1,940595304  | 2,21959457   | -0,27899927 |  |
| 228116_at    | -               | 2,109966786  | 2,389070873  | -0,27910409 |  |
| 211289_x_at  | CDK11A /// CDK1 | 0,760715727  | 1,039887232  | -0,2791715  |  |
| 211513_s_at  | OGFR            | 0,555999837  | 0,835239052  | -0,27923922 |  |
| 1552902_a_at | FOXP2           | -1,543331864 | -1,264005341 | -0,27932652 |  |

|              |                |              |              |             |  |
|--------------|----------------|--------------|--------------|-------------|--|
| 1561268_at   | -              | -1,543331864 | -1,264005341 | -0,27932652 |  |
| 206388_at    | PDE3A          | -1,543331864 | -1,264005341 | -0,27932652 |  |
| 208048_at    | TACR1          | -1,543331864 | -1,264005341 | -0,27932652 |  |
| 220585_at    | HKDC1          | -1,543331864 | -1,264005341 | -0,27932652 |  |
| 226709_at    | ROBO2          | -1,543331864 | -1,264005341 | -0,27932652 |  |
| 227958_s_at  | GSN            | -1,543331864 | -1,264005341 | -0,27932652 |  |
| 228659_at    | -              | -1,543331864 | -1,264005341 | -0,27932652 |  |
| 232117_at    | ZNF471         | -1,543331864 | -1,264005341 | -0,27932652 |  |
| 232245_at    | SLC25A34       | -1,543331864 | -1,264005341 | -0,27932652 |  |
| 233913_at    | WFDC10A        | -1,543331864 | -1,264005341 | -0,27932652 |  |
| 234317_s_at  | STOX2          | -1,543331864 | -1,264005341 | -0,27932652 |  |
| 241391_at    | -              | -1,543331864 | -1,264005341 | -0,27932652 |  |
| 241913_at    | -              | -1,543331864 | -1,264005341 | -0,27932652 |  |
| 212028_at    | RBM25          | 4,240968785  | 4,520382831  | -0,27941405 |  |
| 208502_s_at  | PITX1          | 1,201332287  | 1,480766833  | -0,27943455 |  |
| 218547_at    | DHDDS          | 1,973904239  | 2,253342112  | -0,27943787 |  |
| 226529_at    | TMEM106B       | 2,845159691  | 3,124599694  | -0,27944    |  |
| 219665_at    | NUDT18         | -0,325749314 | -0,046302147 | -0,27944717 |  |
| 207901_at    | IL12B          | -3,37835     | -3,098858316 | -0,27949168 |  |
| 233318_at    | -              | -3,37835     | -3,098858316 | -0,27949168 |  |
| 241200_x_at  | -              | -3,37835     | -3,098858316 | -0,27949168 |  |
| 214035_x_at  | LOC399491      | 3,149650293  | 3,429217209  | -0,27956692 |  |
| 242742_at    | -              | 0,20027154   | 0,479907041  | -0,2796355  |  |
| 233013_x_at  | LOC220906      | 3,568395593  | 3,848241888  | -0,2798463  |  |
| 222791_at    | RSBN1          | 2,568189989  | 2,848075314  | -0,27988532 |  |
| 1569025_s_at | FAM13A         | 0,613492853  | 0,893473268  | -0,27998041 |  |
| 229893_at    | FRMD3          | 0,613492853  | 0,893473268  | -0,27998041 |  |
| 204706_at    | INPP5E         | 2,017152618  | 2,297144887  | -0,27999227 |  |
| 221216_s_at  | SCMH1          | 0,072842263  | 0,352836757  | -0,27999449 |  |
| 1552287_s_at | AFG3L1P        | 2,429008604  | 2,709065209  | -0,28005661 |  |
| 1554391_at   | LOC653581      | -0,741668563 | -0,461594427 | -0,28007414 |  |
| 213884_s_at  | TRIM3          | -0,741668563 | -0,461594427 | -0,28007414 |  |
| 230054_at    | LOC100507547 / | -0,741668563 | -0,461594427 | -0,28007414 |  |
| 231803_at    | FGF11          | -0,741668563 | -0,461594427 | -0,28007414 |  |
| 237942_at    | SNRK-AS1       | -0,741668563 | -0,461594427 | -0,28007414 |  |
| 239427_at    | SLAMF1         | -0,741668563 | -0,461594427 | -0,28007414 |  |
| 1559159_at   | CEP68          | -0,926850548 | -0,646746079 | -0,28010447 |  |
| 1562960_at   | KCNQ1-AS1      | -0,926850548 | -0,646746079 | -0,28010447 |  |
| 203864_s_at  | ACTN2          | -0,926850548 | -0,646746079 | -0,28010447 |  |
| 213257_at    | SARM1          | -0,926850548 | -0,646746079 | -0,28010447 |  |
| 214402_s_at  | SFI1           | -0,926850548 | -0,646746079 | -0,28010447 |  |
| 230135_at    | HHIP           | -0,926850548 | -0,646746079 | -0,28010447 |  |
| 230647_at    | TMEM53         | -0,926850548 | -0,646746079 | -0,28010447 |  |
| 238667_at    | TCF20          | -0,926850548 | -0,646746079 | -0,28010447 |  |
| 243499_at    | -              | -0,926850548 | -0,646746079 | -0,28010447 |  |
| 244772_at    | -              | -0,926850548 | -0,646746079 | -0,28010447 |  |
| 214252_s_at  | CLN5           | 1,64218396   | 1,922365006  | -0,28018105 |  |
| 1569053_at   | AP3M2          | 0,934330293  | 1,214517879  | -0,28018759 |  |
| 214531_s_at  | SNX1           | 2,392522438  | 2,672945617  | -0,28042318 |  |
| 37462_i_at   | SF3A2          | 2,640847372  | 2,921282473  | -0,2804351  |  |
| 213471_at    | NPHP4          | 0,95671774   | 1,23718272   | -0,28046498 |  |
| 218141_at    | UBE2O          | 0,95671774   | 1,23718272   | -0,28046498 |  |
| 213394_at    | MAPKBP1        | 0,273439642  | 0,553993624  | -0,28055398 |  |
| 200045_at    | ABCF1          | 4,278110569  | 4,558677353  | -0,28056678 |  |
| 244132_x_at  | ZNF518A        | 1,932146506  | 2,212749286  | -0,28060278 |  |
| 213428_s_at  | COL6A1         | 1,578645857  | 1,859476797  | -0,28083094 |  |

|             |              |              |              |             |  |
|-------------|--------------|--------------|--------------|-------------|--|
| 1556422_at  | -            | -0,221656139 | 0,059218869  | -0,28087501 |  |
| 222185_at   | PKNOX2       | -0,221656139 | 0,059218869  | -0,28087501 |  |
| 234310_s_at | SUSD2        | -0,221656139 | 0,059218869  | -0,28087501 |  |
| 1553081_at  | WFDC12       | 0,30867765   | 0,589657387  | -0,28097974 |  |
| 210160_at   | PAFAH1B2     | 0,30867765   | 0,589657387  | -0,28097974 |  |
| 213202_at   | SETD1A       | 0,30867765   | 0,589657387  | -0,28097974 |  |
| 226072_at   | FUK          | 0,695652136  | 0,976641161  | -0,28098902 |  |
| 240572_s_at | LOC374443    | 0,695652136  | 0,976641161  | -0,28098902 |  |
| 210981_s_at | GRK6         | 1,326951551  | 1,60795124   | -0,28099969 |  |
| 202416_at   | DNAJC7       | 4,514343647  | 4,795472925  | -0,28112928 |  |
| 220040_x_at | ZC4H2        | 2,171078719  | 2,452428893  | -0,28135017 |  |
| 215670_s_at | SCAND2       | -0,172274514 | 0,109221392  | -0,28149591 |  |
| 244756_at   | ANKRD13D     | -0,172274514 | 0,109221392  | -0,28149591 |  |
| 239792_at   | LOC440288    | 0,747935635  | 1,029536893  | -0,28160126 |  |
| 1557024_at  | -            | -2,972500237 | -2,690860744 | -0,28163949 |  |
| 1557548_at  | C10orf108    | -2,972500237 | -2,690860744 | -0,28163949 |  |
| 1558764_at  | -            | -2,972500237 | -2,690860744 | -0,28163949 |  |
| 1560604_at  | -            | -2,972500237 | -2,690860744 | -0,28163949 |  |
| 1561164_at  | -            | -2,972500237 | -2,690860744 | -0,28163949 |  |
| 1561242_at  | -            | -2,972500237 | -2,690860744 | -0,28163949 |  |
| 1561486_at  | -            | -2,972500237 | -2,690860744 | -0,28163949 |  |
| 1563312_at  | -            | -2,972500237 | -2,690860744 | -0,28163949 |  |
| 1566825_at  | -            | -2,972500237 | -2,690860744 | -0,28163949 |  |
| 1566950_at  | -            | -2,972500237 | -2,690860744 | -0,28163949 |  |
| 1569341_at  | -            | -2,972500237 | -2,690860744 | -0,28163949 |  |
| 207737_at   | -            | -2,972500237 | -2,690860744 | -0,28163949 |  |
| 208329_at   | PBOV1        | -2,972500237 | -2,690860744 | -0,28163949 |  |
| 211925_s_at | PLCB1        | -2,972500237 | -2,690860744 | -0,28163949 |  |
| 215312_at   | -            | -2,972500237 | -2,690860744 | -0,28163949 |  |
| 217372_at   | -            | -2,972500237 | -2,690860744 | -0,28163949 |  |
| 229964_at   | C9orf152     | -2,972500237 | -2,690860744 | -0,28163949 |  |
| 233826_at   | -            | -2,972500237 | -2,690860744 | -0,28163949 |  |
| 236359_at   | SCN4B        | -2,972500237 | -2,690860744 | -0,28163949 |  |
| 236878_at   | -            | -2,972500237 | -2,690860744 | -0,28163949 |  |
| 237760_at   | LOC100505768 | -2,972500237 | -2,690860744 | -0,28163949 |  |
| 238394_at   | -            | -2,972500237 | -2,690860744 | -0,28163949 |  |
| 241664_x_at | -            | -2,972500237 | -2,690860744 | -0,28163949 |  |
| 243041_s_at | -            | -2,972500237 | -2,690860744 | -0,28163949 |  |
| 244558_at   | -            | -2,972500237 | -2,690860744 | -0,28163949 |  |
| 213939_s_at | RUFY3        | 1,649074067  | 1,930732138  | -0,28165807 |  |
| 240291_at   | -            | 0,376672223  | 0,658444279  | -0,28177206 |  |
| 201918_at   | SLC25A36     | 2,705069849  | 2,986947093  | -0,28187724 |  |
| 235879_at   | -            | 1,67631007   | 1,958277216  | -0,28196715 |  |
| 209635_at   | AP1S1        | 3,330897748  | 3,6128809    | -0,28198315 |  |
| 226739_at   | RNF169       | 1,960118853  | 2,242180416  | -0,28206156 |  |
| 221548_s_at | ILKAP        | 2,837639949  | 3,119728903  | -0,28208895 |  |
| 202570_s_at | DLGAP4       | 1,493160564  | 1,775255987  | -0,28209542 |  |
| 1553375_at  | BTBD9        | -1,047650486 | -0,765504029 | -0,28214646 |  |
| 1555853_at  | LOC100507463 | -1,047650486 | -0,765504029 | -0,28214646 |  |
| 1563997_at  | CEP41        | -1,047650486 | -0,765504029 | -0,28214646 |  |
| 205050_s_at | MAPK8IP2     | -1,047650486 | -0,765504029 | -0,28214646 |  |
| 216116_at   | NCKIPSD      | -1,047650486 | -0,765504029 | -0,28214646 |  |
| 219856_at   | C1orf116     | -1,047650486 | -0,765504029 | -0,28214646 |  |
| 222171_s_at | PKNOX2       | -1,047650486 | -0,765504029 | -0,28214646 |  |
| 227902_at   | ZFP41        | -1,047650486 | -0,765504029 | -0,28214646 |  |
| 229502_at   | CHDH         | -1,047650486 | -0,765504029 | -0,28214646 |  |

|              |                 |              |              |             |  |
|--------------|-----------------|--------------|--------------|-------------|--|
| 230555_s_at  | MED30           | -1,047650486 | -0,765504029 | -0,28214646 |  |
| 236829_at    | -               | -1,047650486 | -0,765504029 | -0,28214646 |  |
| 210401_at    | P2RX1           | 0,798390451  | 1,080561626  | -0,28217117 |  |
| 1555856_s_at | AKR1C1          | -0,67289328  | -0,39061235  | -0,28228093 |  |
| 228689_at    | NDUFA11         | -0,67289328  | -0,39061235  | -0,28228093 |  |
| 235146_at    | TMCC3           | -0,67289328  | -0,39061235  | -0,28228093 |  |
| 240878_at    | SPEM1           | -0,67289328  | -0,39061235  | -0,28228093 |  |
| 241520_x_at  | -               | -0,67289328  | -0,39061235  | -0,28228093 |  |
| 224661_at    | PIGY            | 3,28739962   | 3,569779975  | -0,28238035 |  |
| 203804_s_at  | LUC7L3          | 4,108517049  | 4,390931194  | -0,28241415 |  |
| 1554465_s_at | ZNF673 /// ZNF6 | 0,822971223  | 1,105412836  | -0,28244161 |  |
| 227565_at    | KLHL5           | 0,822971223  | 1,105412836  | -0,28244161 |  |
| 1557217_a_at | FANCB           | 0,44160593   | 0,724100169  | -0,28249424 |  |
| 213733_at    | MYO1F           | 0,44160593   | 0,724100169  | -0,28249424 |  |
| 205052_at    | AUH             | 2,089851283  | 2,372786857  | -0,28293557 |  |
| 209407_s_at  | DEAF1           | 1,883312263  | 2,166264721  | -0,28295246 |  |
| 1007_s_at    | DDR1 /// MIR464 | 0,698975959  | 0,982018865  | -0,28304291 |  |
| 224707_at    | CYSTM1          | 2,626954721  | 2,910041809  | -0,28308709 |  |
| 234307_s_at  | KIF26A          | 0,503742507  | 0,786897721  | -0,28315521 |  |
| 240297_at    | -               | 0,503742507  | 0,786897721  | -0,28315521 |  |
| 225649_s_at  | STK35           | 4,648465551  | 4,931630058  | -0,28316451 |  |
| 205239_at    | AREG /// AREGB  | 3,539022513  | 3,822243651  | -0,28322114 |  |
| 201419_at    | BAP1            | 2,342392905  | 2,625627364  | -0,28323446 |  |
| 224977_at    | C6orf89         | 1,296557217  | 1,579853228  | -0,28329601 |  |
| 214714_at    | ZNF394          | 1,917954284  | 2,201267805  | -0,28331352 |  |
| 225350_s_at  | ZYG11B          | 3,249366227  | 3,532699346  | -0,28333312 |  |
| 209092_s_at  | GLOD4           | 3,591828571  | 3,875225653  | -0,28339708 |  |
| 200862_at    | DHCR24          | 4,239257588  | 4,522690941  | -0,28343335 |  |
| 213983_s_at  | PDS5A           | 0,917308734  | 1,200746069  | -0,28343734 |  |
| 244401_at    | LCA5            | 0,917308734  | 1,200746069  | -0,28343734 |  |
| 201641_at    | BST2            | 3,219589925  | 3,503081281  | -0,28349136 |  |
| 211944_at    | PRRC2C          | 2,783874823  | 3,067567462  | -0,28369264 |  |
| 205801_s_at  | RASGRP3         | 1,722769813  | 2,006570641  | -0,28380083 |  |
| 242735_x_at  | ELF2            | 1,722769813  | 2,006570641  | -0,28380083 |  |
| 229009_at    | SIX5            | 0,962260738  | 1,246149888  | -0,28388915 |  |
| 207986_x_at  | CYB561          | 1,073999308  | 1,3579181    | -0,28391879 |  |
| 219984_s_at  | HRASLS          | 1,073999308  | 1,3579181    | -0,28391879 |  |
| 220163_s_at  | HR              | 0,052199481  | 0,336136178  | -0,2839367  |  |
| 231958_at    | TAMM41          | 0,052199481  | 0,336136178  | -0,2839367  |  |
| 202684_s_at  | RNMT            | 1,177702228  | 1,461646549  | -0,28394432 |  |
| 212218_s_at  | FASN            | 2,87191078   | 3,155865206  | -0,28395443 |  |
| 1553027_a_at | KLHL4           | -0,85085127  | -0,566887459 | -0,28396381 |  |
| 206128_at    | ADRA2C          | -0,85085127  | -0,566887459 | -0,28396381 |  |
| 230253_at    | SCUBE3          | -0,85085127  | -0,566887459 | -0,28396381 |  |
| 230359_at    | KNDC1           | -0,85085127  | -0,566887459 | -0,28396381 |  |
| 236251_at    | -               | -0,85085127  | -0,566887459 | -0,28396381 |  |
| 237748_at    | SCGB2B2         | -0,85085127  | -0,566887459 | -0,28396381 |  |
| 238888_at    | -               | -0,85085127  | -0,566887459 | -0,28396381 |  |
| 226459_at    | PIK3AP1         | 3,421207626  | 3,705189898  | -0,28398227 |  |
| 1553078_at   | OR5P3           | -1,196375121 | -0,912331589 | -0,28404353 |  |
| 1559324_at   | USP32P2         | -1,196375121 | -0,912331589 | -0,28404353 |  |
| 1560784_x_at | -               | -1,196375121 | -0,912331589 | -0,28404353 |  |
| 1561310_at   | IGK@            | -1,196375121 | -0,912331589 | -0,28404353 |  |
| 206260_at    | TGM4            | -1,196375121 | -0,912331589 | -0,28404353 |  |
| 210061_at    | ZNF589          | -1,196375121 | -0,912331589 | -0,28404353 |  |
| 223500_at    | CPLX1           | -1,196375121 | -0,912331589 | -0,28404353 |  |

|              |                 |              |              |             |  |
|--------------|-----------------|--------------|--------------|-------------|--|
| 227050_at    | ODZ3            | -1,196375121 | -0,912331589 | -0,28404353 |  |
| 227526_at    | CDON            | -1,196375121 | -0,912331589 | -0,28404353 |  |
| 230153_at    | NEK9            | -1,196375121 | -0,912331589 | -0,28404353 |  |
| 231753_s_at  | PCDHGC4         | -1,196375121 | -0,912331589 | -0,28404353 |  |
| 235954_at    | -               | -1,196375121 | -0,912331589 | -0,28404353 |  |
| 237432_at    | -               | -1,196375121 | -0,912331589 | -0,28404353 |  |
| 237847_at    | NTN1            | -1,196375121 | -0,912331589 | -0,28404353 |  |
| 204113_at    | CELF1           | 1,094335495  | 1,378453643  | -0,28411815 |  |
| 228598_at    | DPP10           | 1,094335495  | 1,378453643  | -0,28411815 |  |
| 201792_at    | AEBP1           | 2,061726373  | 2,345926937  | -0,28420056 |  |
| 224715_at    | WDR34           | 1,496984567  | 1,781437557  | -0,28445299 |  |
| 212510_at    | GPD1L           | 2,837639949  | 3,122166354  | -0,28452641 |  |
| 209361_s_at  | PCBP4           | 0,648296226  | 0,932882274  | -0,28458605 |  |
| 209244_s_at  | KIF1C           | 0,133056859  | 0,417770464  | -0,28471361 |  |
| 213728_at    | LAMP1           | 0,133056859  | 0,417770464  | -0,28471361 |  |
| 214403_x_at  | SPDEF           | 0,133056859  | 0,417770464  | -0,28471361 |  |
| 229887_at    | ALS2CL          | 0,133056859  | 0,417770464  | -0,28471361 |  |
| 228948_at    | EPHA4           | 0,67554678   | 0,960386719  | -0,28483994 |  |
| 1563078_at   | -               | -0,543051993 | -0,258114234 | -0,28493776 |  |
| 206217_at    | EDA             | -0,543051993 | -0,258114234 | -0,28493776 |  |
| 206406_at    | SMCP            | -0,543051993 | -0,258114234 | -0,28493776 |  |
| 207211_at    | USP2            | -0,543051993 | -0,258114234 | -0,28493776 |  |
| 217066_s_at  | DMPK            | -0,543051993 | -0,258114234 | -0,28493776 |  |
| 243827_at    | -               | -0,543051993 | -0,258114234 | -0,28493776 |  |
| 203712_at    | KIAA0020        | 3,177319542  | 3,462299654  | -0,28498011 |  |
| 215515_at    | -               | 0,209623097  | 0,495031851  | -0,28540875 |  |
| 230274_s_at  | -               | 0,209623097  | 0,495031851  | -0,28540875 |  |
| 208937_s_at  | ID1             | 3,021441862  | 3,307062282  | -0,28562042 |  |
| 228521_s_at  | MIA-RAB4B /// R | 2,127340679  | 2,413157372  | -0,28581669 |  |
| 227920_at    | BEND3           | 1,805273023  | 2,091116676  | -0,28584365 |  |
| 212106_at    | FAF2            | 1,063722698  | 1,349621332  | -0,28589863 |  |
| 234710_s_at  | PARP6           | 1,063722698  | 1,349621332  | -0,28589863 |  |
| 212380_at    | FTSJD2          | 2,472384965  | 2,758473378  | -0,28608841 |  |
| 233003_at    | -               | 0,82905153   | 1,115234684  | -0,28618315 |  |
| 210069_at    | CHKB-CPT1B ///  | 0,97328325   | 1,259496994  | -0,28621374 |  |
| 238434_at    | SMCR8           | 0,97328325   | 1,259496994  | -0,28621374 |  |
| 215203_at    | GOLGA4          | 0,317354302  | 0,603679647  | -0,28632534 |  |
| 227293_at    | -               | 0,317354302  | 0,603679647  | -0,28632534 |  |
| 234423_x_at  | -               | 0,317354302  | 0,603679647  | -0,28632534 |  |
| 239288_at    | TNIK            | 0,317354302  | 0,603679647  | -0,28632534 |  |
| 204752_x_at  | PARP2           | 3,642769857  | 3,92911743   | -0,28634757 |  |
| 222202_at    | -               | -3,32387526  | -3,037500868 | -0,28637439 |  |
| 1554721_a_at | TAF2            | 2,369762403  | 2,656223838  | -0,28646144 |  |
| 203928_x_at  | MAPT            | 0,351548291  | 0,638150376  | -0,28660209 |  |
| 216481_at    | GRIP2           | 0,351548291  | 0,638150376  | -0,28660209 |  |
| 242448_at    | -               | 0,351548291  | 0,638150376  | -0,28660209 |  |
| 202208_s_at  | ARL4C           | -0,423248115 | -0,136643983 | -0,28660413 |  |
| 213487_at    | MAP2K2          | -0,423248115 | -0,136643983 | -0,28660413 |  |
| 219747_at    | NDNF            | -0,423248115 | -0,136643983 | -0,28660413 |  |
| 235371_at    | GXYLT2          | -0,423248115 | -0,136643983 | -0,28660413 |  |
| 236499_at    | C1orf86         | -0,423248115 | -0,136643983 | -0,28660413 |  |
| 240029_at    | C11orf94        | -0,423248115 | -0,136643983 | -0,28660413 |  |
| 219978_s_at  | NUSAP1          | 2,794789337  | 3,081412119  | -0,28662278 |  |
| 1562208_a_at | -               | -1,399512875 | -1,112851844 | -0,28666103 |  |
| 1570264_at   | -               | -1,399512875 | -1,112851844 | -0,28666103 |  |
| 203483_at    | SEMA4G          | -1,399512875 | -1,112851844 | -0,28666103 |  |



|              |                |              |              |             |  |
|--------------|----------------|--------------|--------------|-------------|--|
| 206872_at    | SLC17A1        | -1,399512875 | -1,112851844 | -0,28666103 |  |
| 220227_at    | CDH4           | -1,399512875 | -1,112851844 | -0,28666103 |  |
| 227452_at    | LOC100499467   | -1,399512875 | -1,112851844 | -0,28666103 |  |
| 232120_at    | -              | -1,399512875 | -1,112851844 | -0,28666103 |  |
| 239704_at    | RNF144B        | -1,399512875 | -1,112851844 | -0,28666103 |  |
| 240562_at    | GSK3B          | -1,399512875 | -1,112851844 | -0,28666103 |  |
| 241493_at    | -              | -1,399512875 | -1,112851844 | -0,28666103 |  |
| 1554555_a_at | SETD6          | 1,578645857  | 1,865308541  | -0,28666268 |  |
| 221277_s_at  | PUS3           | 2,342392905  | 2,629059192  | -0,28666629 |  |
| 203506_s_at  | MED12          | 1,163336153  | 1,450051551  | -0,2867154  |  |
| 227297_at    | ITGA9          | 2,923969333  | 3,210719429  | -0,2867501  |  |
| 221600_s_at  | C11orf67       | 2,122398022  | 2,409170778  | -0,28677276 |  |
| 214540_at    | HIST1H2BO      | 1,593009234  | 1,879785595  | -0,28677636 |  |
| 203330_s_at  | STX5           | 0,57782909   | 0,864649967  | -0,28682088 |  |
| 213742_at    | SRSF11         | 0,606430281  | 0,893473268  | -0,28704299 |  |
| 211767_at    | GIN54          | 2,220484971  | 2,507538456  | -0,28705348 |  |
| 228205_at    | TKT            | 0,417596971  | 0,704715219  | -0,28711825 |  |
| 205988_at    | CD84           | 1,649074067  | 1,936283387  | -0,28720932 |  |
| 232254_at    | -              | 1,649074067  | 1,936283387  | -0,28720932 |  |
| 1556468_at   | -              | -0,366776884 | -0,079522948 | -0,28725394 |  |
| 1560474_at   | -              | -0,366776884 | -0,079522948 | -0,28725394 |  |
| 213348_at    | CDKN1C         | -0,366776884 | -0,079522948 | -0,28725394 |  |
| 227393_at    | ANO9           | -0,366776884 | -0,079522948 | -0,28725394 |  |
| 232253_at    | C5orf56        | -0,366776884 | -0,079522948 | -0,28725394 |  |
| 236572_at    | LOC100652952 / | -0,366776884 | -0,079522948 | -0,28725394 |  |
| 240106_at    | GNPTAB         | -0,366776884 | -0,079522948 | -0,28725394 |  |
| 241453_at    | LOC100653024 / | -0,366776884 | -0,079522948 | -0,28725394 |  |
| 1555945_s_at | FAM120A        | 2,582657321  | 2,869995113  | -0,28733779 |  |
| 35820_at     | GM2A           | 2,325288363  | 2,612684806  | -0,28739644 |  |
| 200636_s_at  | PTPRF          | 1,932146506  | 2,21959457   | -0,28744806 |  |
| 1556357_s_at | ERICH1         | -2,908843709 | -2,621331989 | -0,28751172 |  |
| 1557551_at   | -              | -2,908843709 | -2,621331989 | -0,28751172 |  |
| 1558428_at   | ALS2CR11       | -2,908843709 | -2,621331989 | -0,28751172 |  |
| 1562688_at   | -              | -2,908843709 | -2,621331989 | -0,28751172 |  |
| 1564936_at   | -              | -2,908843709 | -2,621331989 | -0,28751172 |  |
| 1566515_at   | CWF19L2        | -2,908843709 | -2,621331989 | -0,28751172 |  |
| 1569587_at   | -              | -2,908843709 | -2,621331989 | -0,28751172 |  |
| 224021_at    | RP1            | -2,908843709 | -2,621331989 | -0,28751172 |  |
| 233216_at    | ZDHHC21        | -2,908843709 | -2,621331989 | -0,28751172 |  |
| 234194_at    | -              | -2,908843709 | -2,621331989 | -0,28751172 |  |
| 238390_at    | -              | -2,908843709 | -2,621331989 | -0,28751172 |  |
| 241352_at    | -              | -2,908843709 | -2,621331989 | -0,28751172 |  |
| 241678_at    | -              | -2,908843709 | -2,621331989 | -0,28751172 |  |
| 242286_at    | GRIN2A         | -2,908843709 | -2,621331989 | -0,28751172 |  |
| 243469_at    | -              | -2,908843709 | -2,621331989 | -0,28751172 |  |
| 209413_at    | B4GALT2        | 0,480753764  | 0,768343791  | -0,28759003 |  |
| 205625_s_at  | CALB1          | 1,795990708  | 2,083632167  | -0,28764146 |  |
| 217787_s_at  | GALNT2         | 1,292162421  | 1,579853228  | -0,28769081 |  |
| 210613_s_at  | SYNGR1         | 2,371846398  | 2,659583735  | -0,28773734 |  |
| 218517_at    | PHF17          | 2,380152406  | 2,667949403  | -0,287797   |  |
| 214459_x_at  | HLA-C          | 6,002329857  | 6,290373396  | -0,28804354 |  |
| 229568_at    | MOB3B          | 2,094906514  | 2,382985886  | -0,28807937 |  |
| 222981_s_at  | RAB10          | 4,181024227  | 4,469125898  | -0,28810167 |  |
| 204212_at    | ACOT8          | 2,55541096   | 2,843651104  | -0,28824014 |  |
| 1562434_at   | UNK            | -0,706943342 | -0,41858459  | -0,28835875 |  |
| 207352_s_at  | GABRB2         | -0,706943342 | -0,41858459  | -0,28835875 |  |

|             |                  |              |              |             |  |
|-------------|------------------|--------------|--------------|-------------|--|
| 215184_at   | DAPK2            | -0,706943342 | -0,41858459  | -0,28835875 |  |
| 216301_at   | -                | -0,706943342 | -0,41858459  | -0,28835875 |  |
| 219425_at   | SULT4A1          | -0,706943342 | -0,41858459  | -0,28835875 |  |
| 219749_at   | SH2D4A           | -0,706943342 | -0,41858459  | -0,28835875 |  |
| 230367_at   | SMTNL1           | -0,706943342 | -0,41858459  | -0,28835875 |  |
| 230925_at   | APBB1IP          | -0,706943342 | -0,41858459  | -0,28835875 |  |
| 232557_at   | UBAP1L           | -0,706943342 | -0,41858459  | -0,28835875 |  |
| 210594_x_at | MPZL1            | 0,792179257  | 1,080561626  | -0,28838237 |  |
| 212007_at   | UBXN4            | 2,288253583  | 2,576704359  | -0,28845078 |  |
| 235052_at   | ZNF792           | 0,984222186  | 1,272721751  | -0,28849957 |  |
| 212068_s_at | PRRC2B           | 2,983784569  | 3,272369332  | -0,28858476 |  |
| 206175_x_at | ZNF222           | 1,865674241  | 2,154405725  | -0,28873148 |  |
| 226264_at   | SUSD1            | 1,960118853  | 2,248887791  | -0,28876894 |  |
| 210975_x_at | FASTK            | 2,790121796  | 3,078904771  | -0,28878298 |  |
| 209311_at   | BCL2L2           | 1,889144008  | 2,17802703   | -0,28888302 |  |
| 208804_s_at | SRSF6            | 4,678662137  | 4,967654074  | -0,28899194 |  |
| 222798_at   | PTER             | 0,888485433  | 1,177496821  | -0,28901139 |  |
| 227030_at   | IKZF3            | 1,089278259  | 1,378453643  | -0,28917538 |  |
| 214185_at   | KHDRBS1          | -0,112808516 | 0,176436073  | -0,28924459 |  |
| 212294_at   | GNG12            | 0,228146222  | 0,51742585   | -0,28927963 |  |
| 218648_at   | CRTC3            | 2,292660284  | 2,582026171  | -0,28936589 |  |
| 219915_s_at | SLC16A10         | 1,129248302  | 1,418668082  | -0,28941978 |  |
| 1558702_at  | TEX10            | -1,240169874 | -0,950686014 | -0,28948386 |  |
| 1567036_at  | C20orf181        | -1,240169874 | -0,950686014 | -0,28948386 |  |
| 206774_at   | FRMPD1           | -1,240169874 | -0,950686014 | -0,28948386 |  |
| 210569_s_at | SIGLEC9          | -1,240169874 | -0,950686014 | -0,28948386 |  |
| 220929_at   | GALNT8           | -1,240169874 | -0,950686014 | -0,28948386 |  |
| 224133_at   | -                | -1,240169874 | -0,950686014 | -0,28948386 |  |
| 231833_at   | RBM33            | -1,240169874 | -0,950686014 | -0,28948386 |  |
| 234278_at   | -                | -1,240169874 | -0,950686014 | -0,28948386 |  |
| 234862_at   | -                | -1,240169874 | -0,950686014 | -0,28948386 |  |
| 235265_at   | UBR3             | -1,240169874 | -0,950686014 | -0,28948386 |  |
| 237165_at   | -                | -1,240169874 | -0,950686014 | -0,28948386 |  |
| 237229_at   | KDM8             | -1,240169874 | -0,950686014 | -0,28948386 |  |
| 243828_at   | -                | -1,240169874 | -0,950686014 | -0,28948386 |  |
| 244200_at   | -                | -1,240169874 | -0,950686014 | -0,28948386 |  |
| 202691_at   | SNRPD1           | 3,69530589   | 3,985091175  | -0,28978529 |  |
| 229906_at   | ARMC7            | -0,022466681 | 0,26733076   | -0,28979744 |  |
| 244383_at   | -                | 0,334552598  | 0,624460759  | -0,28990816 |  |
| 228252_at   | PIF1             | 0,020670649  | 0,310717132  | -0,29004648 |  |
| 244544_at   | -                | 0,020670649  | 0,310717132  | -0,29004648 |  |
| 206231_at   | KCNN1            | 0,401366113  | 0,691645685  | -0,29027957 |  |
| 212259_s_at | PBXIP1           | 0,401366113  | 0,691645685  | -0,29027957 |  |
| 219433_at   | BCOR             | 2,061726373  | 2,352169913  | -0,29044354 |  |
| 213570_at   | EIF4E2 /// LOC10 | 0,103263601  | 0,393761504  | -0,2904979  |  |
| 226725_at   | -                | 0,103263601  | 0,393761504  | -0,2904979  |  |
| 228001_at   | TMEM50B          | 1,868628927  | 2,159161028  | -0,2905321  |  |
| 225420_at   | GPAM             | 0,46522187   | 0,755840599  | -0,29061873 |  |
| 227619_at   | WRNIP1           | 0,46522187   | 0,755840599  | -0,29061873 |  |
| 211013_x_at | PML              | 1,659347917  | 1,950068772  | -0,29072086 |  |
| 202677_at   | RASA1            | 4,360703168  | 4,651455664  | -0,2907525  |  |
| 202305_s_at | FEZ2             | 2,122398022  | 2,413157372  | -0,29075935 |  |
| 1561960_at  | CSPG4P5          | -0,57445847  | -0,283667828 | -0,29079064 |  |
| 1563511_at  | DKFZp451B082     | -0,57445847  | -0,283667828 | -0,29079064 |  |
| 229821_at   | -                | -0,57445847  | -0,283667828 | -0,29079064 |  |
| 230236_at   | TDRG1            | -0,57445847  | -0,283667828 | -0,29079064 |  |

|              |            |              |              |             |  |
|--------------|------------|--------------|--------------|-------------|--|
| 231573_at    | FATE1      | -0,57445847  | -0,283667828 | -0,29079064 |  |
| 235887_at    | -          | -0,57445847  | -0,283667828 | -0,29079064 |  |
| 201224_s_at  | SRRM1      | 2,406821352  | 2,697670403  | -0,29084905 |  |
| 1553165_at   | SYNRG      | -1,71423189  | -1,423348341 | -0,29088355 |  |
| 1554299_at   | NPAS4      | -1,71423189  | -1,423348341 | -0,29088355 |  |
| 1562572_at   | -          | -1,71423189  | -1,423348341 | -0,29088355 |  |
| 1563127_at   | -          | -1,71423189  | -1,423348341 | -0,29088355 |  |
| 1569909_at   | KRT79      | -1,71423189  | -1,423348341 | -0,29088355 |  |
| 205207_at    | IL6        | -1,71423189  | -1,423348341 | -0,29088355 |  |
| 211146_at    | -          | -1,71423189  | -1,423348341 | -0,29088355 |  |
| 214518_at    | PDHA2      | -1,71423189  | -1,423348341 | -0,29088355 |  |
| 217453_at    | -          | -1,71423189  | -1,423348341 | -0,29088355 |  |
| 233712_at    | ZNF44      | -1,71423189  | -1,423348341 | -0,29088355 |  |
| 240445_at    | -          | -1,71423189  | -1,423348341 | -0,29088355 |  |
| 242420_at    | -          | -1,71423189  | -1,423348341 | -0,29088355 |  |
| 243762_at    | -          | -1,71423189  | -1,423348341 | -0,29088355 |  |
| 244680_at    | GLRB       | -1,71423189  | -1,423348341 | -0,29088355 |  |
| 1556325_at   | FILIP1     | -3,287237186 | -2,996335703 | -0,29090148 |  |
| 1556884_a_at | LINC00558  | -3,287237186 | -2,996335703 | -0,29090148 |  |
| 1562860_at   | -          | -3,287237186 | -2,996335703 | -0,29090148 |  |
| 1563456_at   | CCDC141    | -3,287237186 | -2,996335703 | -0,29090148 |  |
| 1567878_at   | DEFB114    | -3,287237186 | -2,996335703 | -0,29090148 |  |
| 206935_at    | PCDH8      | -3,287237186 | -2,996335703 | -0,29090148 |  |
| 242940_x_at  | DLX6       | -3,287237186 | -2,996335703 | -0,29090148 |  |
| 203588_s_at  | TFDP2      | 3,085065712  | 3,376085218  | -0,29101951 |  |
| 32029_at     | PDPK1      | 2,190100188  | 2,481196537  | -0,29109635 |  |
| 213510_x_at  | USP32P2    | 2,614687931  | 2,905803877  | -0,29111595 |  |
| 1553513_at   | VNN3       | -2,866296344 | -2,575129729 | -0,29116661 |  |
| 1555177_at   | PRKAA1     | -2,866296344 | -2,575129729 | -0,29116661 |  |
| 1560842_a_at | TEX26-AS1  | -2,866296344 | -2,575129729 | -0,29116661 |  |
| 1561253_at   | -          | -2,866296344 | -2,575129729 | -0,29116661 |  |
| 1565741_at   | -          | -2,866296344 | -2,575129729 | -0,29116661 |  |
| 1566677_at   | MMP2       | -2,866296344 | -2,575129729 | -0,29116661 |  |
| 1566953_x_at | -          | -2,866296344 | -2,575129729 | -0,29116661 |  |
| 1568851_at   | -          | -2,866296344 | -2,575129729 | -0,29116661 |  |
| 1570296_at   | -          | -2,866296344 | -2,575129729 | -0,29116661 |  |
| 207267_s_at  | DSCR6      | -2,866296344 | -2,575129729 | -0,29116661 |  |
| 207430_s_at  | MSMB       | -2,866296344 | -2,575129729 | -0,29116661 |  |
| 207810_at    | F13B       | -2,866296344 | -2,575129729 | -0,29116661 |  |
| 210503_at    | MAGEA11    | -2,866296344 | -2,575129729 | -0,29116661 |  |
| 216766_at    | -          | -2,866296344 | -2,575129729 | -0,29116661 |  |
| 216978_x_at  | -          | -2,866296344 | -2,575129729 | -0,29116661 |  |
| 220979_s_at  | ST6GALNAC5 | -2,866296344 | -2,575129729 | -0,29116661 |  |
| 221101_at    | -          | -2,866296344 | -2,575129729 | -0,29116661 |  |
| 233150_at    | GALNTL5    | -2,866296344 | -2,575129729 | -0,29116661 |  |
| 236893_at    | HOXB-AS3   | -2,866296344 | -2,575129729 | -0,29116661 |  |
| 237290_at    | -          | -2,866296344 | -2,575129729 | -0,29116661 |  |
| 238484_s_at  | SSBP2      | -2,866296344 | -2,575129729 | -0,29116661 |  |
| 239006_at    | SLC26A7    | -2,866296344 | -2,575129729 | -0,29116661 |  |
| 220940_at    | ANKRD36B   | 0,853119696  | 1,144305291  | -0,2911856  |  |
| 226967_at    | FIZ1       | 0,853119696  | 1,144305291  | -0,2911856  |  |
| 229359_at    | -          | 0,853119696  | 1,144305291  | -0,2911856  |  |
| 218076_s_at  | ARHGAP17   | 3,296204798  | 3,587527995  | -0,2913232  |  |
| 240665_at    | -          | 0,613492853  | 0,904843258  | -0,29135041 |  |
| 230464_at    | S1PR5      | 1,119359127  | 1,410714371  | -0,29135524 |  |
| 222425_s_at  | POLDIP2    | 2,876321464  | 3,16771226   | -0,2913908  |  |

|              |                 |              |              |             |  |
|--------------|-----------------|--------------|--------------|-------------|--|
| 204140_at    | TPST1           | 1,177702228  | 1,469325098  | -0,29162287 |  |
| 208669_s_at  | EID1            | 4,680765024  | 4,972390023  | -0,291625   |  |
| 1553936_a_at | MGC2848         | -0,512251684 | -0,220592223 | -0,29165946 |  |
| 214303_x_at  | MUC5AC          | -0,512251684 | -0,220592223 | -0,29165946 |  |
| 214757_at    | PMS2L2          | -0,512251684 | -0,220592223 | -0,29165946 |  |
| 223844_at    | ADAMTS13        | -0,512251684 | -0,220592223 | -0,29165946 |  |
| 229522_at    | SDR42E1         | -0,512251684 | -0,220592223 | -0,29165946 |  |
| 233161_at    | -               | -0,512251684 | -0,220592223 | -0,29165946 |  |
| 225076_s_at  | ZNFX1           | 2,043538949  | 2,335461563  | -0,29192261 |  |
| 209824_s_at  | ARNTL           | 1,473887017  | 1,765933685  | -0,29204667 |  |
| 219607_s_at  | MS4A4A          | 3,433232044  | 3,725370335  | -0,29213829 |  |
| 222576_s_at  | EIF2C1          | 0,798390451  | 1,090553537  | -0,29216309 |  |
| 222165_x_at  | C9orf16         | 1,69307511   | 1,98530622   | -0,29223111 |  |
| 230686_s_at  | SLC13A3         | 0,822971223  | 1,115234684  | -0,29226346 |  |
| 210115_at    | RPL39L          | 1,373456798  | 1,665902186  | -0,29244539 |  |
| 1552641_s_at | ATAD3A /// ATAD | 2,510717331  | 2,803210557  | -0,29249323 |  |
| 225698_at    | EPB41L4A-AS1    | 4,334228758  | 4,626777417  | -0,29254866 |  |
| 43977_at     | TMEM161A        | 3,314197504  | 3,606801901  | -0,2926044  |  |
| 1554060_s_at | SETMAR          | -0,394749123 | -0,102100538 | -0,29264859 |  |
| 201787_at    | FBLN1           | -0,394749123 | -0,102100538 | -0,29264859 |  |
| 204103_at    | CCL4            | -0,394749123 | -0,102100538 | -0,29264859 |  |
| 204384_at    | GOLGA2          | -0,394749123 | -0,102100538 | -0,29264859 |  |
| 215028_at    | SEMA6A          | -0,394749123 | -0,102100538 | -0,29264859 |  |
| 217495_x_at  | CALCA           | -0,394749123 | -0,102100538 | -0,29264859 |  |
| 222542_x_at  | ADCK3           | -0,394749123 | -0,102100538 | -0,29264859 |  |
| 234585_at    | -               | -0,394749123 | -0,102100538 | -0,29264859 |  |
| 237079_at    | -               | -0,394749123 | -0,102100538 | -0,29264859 |  |
| 1554325_at   | DOCK2           | -2,504600601 | -2,211750327 | -0,29285027 |  |
| 1556489_at   | TMEM247         | -2,504600601 | -2,211750327 | -0,29285027 |  |
| 1559950_at   | FAM66C /// FAM6 | -2,504600601 | -2,211750327 | -0,29285027 |  |
| 1562473_at   | -               | -2,504600601 | -2,211750327 | -0,29285027 |  |
| 1562870_at   | -               | -2,504600601 | -2,211750327 | -0,29285027 |  |
| 1563452_at   | AVL9            | -2,504600601 | -2,211750327 | -0,29285027 |  |
| 205101_at    | CIITA           | -2,504600601 | -2,211750327 | -0,29285027 |  |
| 205782_at    | FGF7            | -2,504600601 | -2,211750327 | -0,29285027 |  |
| 206481_s_at  | LDB2            | -2,504600601 | -2,211750327 | -0,29285027 |  |
| 207679_at    | PAX3            | -2,504600601 | -2,211750327 | -0,29285027 |  |
| 208302_at    | HMHB1           | -2,504600601 | -2,211750327 | -0,29285027 |  |
| 213814_s_at  | SNTB2           | -2,504600601 | -2,211750327 | -0,29285027 |  |
| 216769_x_at  | -               | -2,504600601 | -2,211750327 | -0,29285027 |  |
| 228942_s_at  | DAB2IP          | -2,504600601 | -2,211750327 | -0,29285027 |  |
| 232027_at    | SYNE1           | -2,504600601 | -2,211750327 | -0,29285027 |  |
| 236762_at    | ATP9B           | -2,504600601 | -2,211750327 | -0,29285027 |  |
| 239065_at    | DNAJC22         | -2,504600601 | -2,211750327 | -0,29285027 |  |
| 244568_at    | -               | -2,504600601 | -2,211750327 | -0,29285027 |  |
| 212561_at    | DENND5A         | 3,237986416  | 3,530865925  | -0,29287951 |  |
| 32837_at     | AGPAT2          | 3,199783157  | 3,492757997  | -0,29297484 |  |
| 235177_at    | METTL21A        | 3,052955227  | 3,346162854  | -0,29320763 |  |
| 1569465_at   | FAM160A1        | -0,285837228 | 0,007421914  | -0,29325914 |  |
| 204038_s_at  | LPAR1           | -0,285837228 | 0,007421914  | -0,29325914 |  |
| 239268_at    | NDUFS1          | -0,285837228 | 0,007421914  | -0,29325914 |  |
| 242457_at    | -               | -0,285837228 | 0,007421914  | -0,29325914 |  |
| 217896_s_at  | FAM192A         | 1,865674241  | 2,159161028  | -0,29348679 |  |
| 1564208_x_at | FLJ35390        | -0,234278768 | 0,059218869  | -0,29349764 |  |
| 207485_x_at  | BTN3A1          | -0,234278768 | 0,059218869  | -0,29349764 |  |
| 232554_at    | LRRC56          | -0,234278768 | 0,059218869  | -0,29349764 |  |

|              |                |              |              |             |  |
|--------------|----------------|--------------|--------------|-------------|--|
| 1554599_x_at | -              | 1,46610492   | 1,759685182  | -0,29358026 |  |
| 209254_at    | KLHDC10        | 1,224581536  | 1,518263577  | -0,29368204 |  |
| 239237_at    | LOC100506776   | 1,224581536  | 1,518263577  | -0,29368204 |  |
| 218364_at    | LRRFIP2        | 1,542099044  | 1,835911187  | -0,29381214 |  |
| 207203_s_at  | NR1I2          | -0,136301282 | 0,157549243  | -0,29385053 |  |
| 230213_at    | C19orf43       | -0,136301282 | 0,157549243  | -0,29385053 |  |
| 232569_at    | -              | -0,136301282 | 0,157549243  | -0,29385053 |  |
| 237266_at    | LOC100289509   | -0,136301282 | 0,157549243  | -0,29385053 |  |
| 226363_at    | ABCC5          | 2,314494121  | 2,608344689  | -0,29385057 |  |
| 235355_at    | CSRNP3         | -0,089689931 | 0,204310755  | -0,29400069 |  |
| 238329_at    | MPRIP          | -0,089689931 | 0,204310755  | -0,29400069 |  |
| 239681_at    | C17orf56       | -0,089689931 | 0,204310755  | -0,29400069 |  |
| 209853_s_at  | PSME3          | 2,972842302  | 3,266872397  | -0,29403009 |  |
| 231296_at    | -              | 0,57058931   | 0,864649967  | -0,29406066 |  |
| 207984_s_at  | MPP2           | 1,021868205  | 1,315948728  | -0,29408052 |  |
| 228128_x_at  | PAPPA          | 2,250242994  | 2,544354523  | -0,29411153 |  |
| 230964_at    | FREM2          | 0,627515113  | 0,921731975  | -0,29421686 |  |
| 244214_at    | LOC100505554   | -0,00073712  | 0,293518836  | -0,29425596 |  |
| 242055_at    | PSMG4          | 0,682279745  | 0,976641161  | -0,29436142 |  |
| 242111_at    | METTL3         | 0,682279745  | 0,976641161  | -0,29436142 |  |
| 238791_at    | ZNF100         | 0,083054335  | 0,377530647  | -0,29447631 |  |
| 217793_at    | RAB11B         | 0,123193849  | 0,417770464  | -0,29457661 |  |
| 232173_at    | CLEC2L         | 0,123193849  | 0,417770464  | -0,29457661 |  |
| 1556173_a_at | -              | 0,810733188  | 1,105412836  | -0,29467965 |  |
| 224452_s_at  | FAM220A        | 3,132544588  | 3,427247355  | -0,29470277 |  |
| 1555171_at   | ST3GAL3        | -3,07502285  | -2,780313924 | -0,29470893 |  |
| 1559546_s_at | LOC100506948 / | -3,07502285  | -2,780313924 | -0,29470893 |  |
| 1561294_a_at | LOC100128554   | -3,07502285  | -2,780313924 | -0,29470893 |  |
| 1561614_at   | SLC8A1         | -3,07502285  | -2,780313924 | -0,29470893 |  |
| 1561780_at   | -              | -3,07502285  | -2,780313924 | -0,29470893 |  |
| 1564387_at   | DOPEY1         | -3,07502285  | -2,780313924 | -0,29470893 |  |
| 1569375_at   | -              | -3,07502285  | -2,780313924 | -0,29470893 |  |
| 206135_at    | ST18           | -3,07502285  | -2,780313924 | -0,29470893 |  |
| 214515_at    | OR1E1          | -3,07502285  | -2,780313924 | -0,29470893 |  |
| 223873_s_at  | -              | -3,07502285  | -2,780313924 | -0,29470893 |  |
| 224358_s_at  | MS4A7          | -3,07502285  | -2,780313924 | -0,29470893 |  |
| 227892_at    | PRKAA2         | -3,07502285  | -2,780313924 | -0,29470893 |  |
| 231464_at    | -              | -3,07502285  | -2,780313924 | -0,29470893 |  |
| 232656_at    | -              | -3,07502285  | -2,780313924 | -0,29470893 |  |
| 234622_at    | -              | -3,07502285  | -2,780313924 | -0,29470893 |  |
| 237797_at    | DNM1L          | -3,07502285  | -2,780313924 | -0,29470893 |  |
| 240544_at    | -              | -3,07502285  | -2,780313924 | -0,29470893 |  |
| 241708_at    | DOCK1          | -3,07502285  | -2,780313924 | -0,29470893 |  |
| 242358_at    | LOC100506451   | -3,07502285  | -2,780313924 | -0,29470893 |  |
| 243530_at    | -              | -3,07502285  | -2,780313924 | -0,29470893 |  |
| 228478_at    | -              | 0,20027154   | 0,495031851  | -0,29476031 |  |
| 202624_s_at  | CABIN1         | 0,859074518  | 1,153866761  | -0,29479224 |  |
| 224517_at    | POLR2J4        | 0,859074518  | 1,153866761  | -0,29479224 |  |
| 227533_at    | -              | 0,859074518  | 1,153866761  | -0,29479224 |  |
| 229710_at    | -              | 0,859074518  | 1,153866761  | -0,29479224 |  |
| 228145_s_at  | ZNF398         | 2,963199262  | 3,258033502  | -0,29483424 |  |
| 215535_s_at  | AGPAT1         | 2,369762403  | 2,664608955  | -0,29484655 |  |
| 225035_x_at  | LOC100288778 / | 3,873548912  | 4,168435485  | -0,29488657 |  |
| 230688_at    | -              | 0,273439642  | 0,568365095  | -0,29492545 |  |
| 230710_at    | MIR210HG       | 0,273439642  | 0,568365095  | -0,29492545 |  |
| 242480_at    | -              | 0,273439642  | 0,568365095  | -0,29492545 |  |

|              |                  |              |              |             |  |
|--------------|------------------|--------------|--------------|-------------|--|
| 206308_at    | TRDMT1           | 0,376672223  | 0,67181667   | -0,29514445 |  |
| 231341_at    | SLC35D3          | 2,994644467  | 3,289820089  | -0,29517562 |  |
| 203776_at    | GPLOW            | 2,325288363  | 2,620464265  | -0,2951759  |  |
| 219022_at    | C12orf43         | 2,178241192  | 2,473581079  | -0,29533989 |  |
| 213850_s_at  | SCAF11           | 2,954882186  | 3,250254796  | -0,29537261 |  |
| 1553228_at   | CCDC89           | -3,250025915 | -2,954576755 | -0,29544916 |  |
| 1557692_a_at | LOC145663        | -3,250025915 | -2,954576755 | -0,29544916 |  |
| 1559842_at   | -                | -3,250025915 | -2,954576755 | -0,29544916 |  |
| 1565809_x_at | -                | -3,250025915 | -2,954576755 | -0,29544916 |  |
| 242805_at    | -                | -3,250025915 | -2,954576755 | -0,29544916 |  |
| 211858_x_at  | GNAS             | 6,178746288  | 6,474462954  | -0,29571667 |  |
| 1564463_at   | LOC100499221     | -1,026571149 | -0,730778808 | -0,29579234 |  |
| 1568804_at   | -                | -1,026571149 | -0,730778808 | -0,29579234 |  |
| 206622_at    | TRH              | -1,026571149 | -0,730778808 | -0,29579234 |  |
| 211389_x_at  | KIR2DL2 /// KIR2 | -1,026571149 | -0,730778808 | -0,29579234 |  |
| 213298_at    | NFIC             | -1,026571149 | -0,730778808 | -0,29579234 |  |
| 215092_s_at  | NFAT5            | -1,026571149 | -0,730778808 | -0,29579234 |  |
| 216854_at    | GDF11            | -1,026571149 | -0,730778808 | -0,29579234 |  |
| 217061_s_at  | ETV1             | -1,026571149 | -0,730778808 | -0,29579234 |  |
| 217139_at    | VDAC1            | -1,026571149 | -0,730778808 | -0,29579234 |  |
| 232265_at    | ATXN7L1          | -1,026571149 | -0,730778808 | -0,29579234 |  |
| 234486_at    | OR51B2           | -1,026571149 | -0,730778808 | -0,29579234 |  |
| 241437_s_at  | EP400NL          | -1,026571149 | -0,730778808 | -0,29579234 |  |
| 1560320_a_at | C1RL-AS1         | -0,83191556  | -0,536087151 | -0,29582841 |  |
| 221242_at    | -                | -0,83191556  | -0,536087151 | -0,29582841 |  |
| 222915_s_at  | BANK1            | -0,83191556  | -0,536087151 | -0,29582841 |  |
| 232929_at    | -                | -0,83191556  | -0,536087151 | -0,29582841 |  |
| 242405_at    | -                | -0,83191556  | -0,536087151 | -0,29582841 |  |
| 212347_x_at  | MIR4800 /// MXD  | 1,454352496  | 1,750261389  | -0,29590889 |  |
| 220323_at    | CNTD2            | 1,454352496  | 1,750261389  | -0,29590889 |  |
| 217144_at    | -                | 3,345817457  | 3,642048499  | -0,29623104 |  |
| 218384_at    | CARHSP1          | 3,375201825  | 3,671470423  | -0,2962686  |  |
| 227044_at    | -                | 1,850809354  | 2,147243253  | -0,2964339  |  |
| 235925_at    | -                | 1,210676994  | 1,507116528  | -0,29643953 |  |
| 200629_at    | WARS             | 4,585658616  | 4,8821546    | -0,29649598 |  |
| 230486_at    | -                | 2,44295215   | 2,739547836  | -0,29659569 |  |
| 218464_s_at  | FAM222B          | 2,782308844  | 3,078904771  | -0,29659593 |  |
| 37201_at     | ITIH4            | -1,08875361  | -0,792121025 | -0,29663259 |  |
| 218001_at    | MRPS2            | 3,335176289  | 3,631821253  | -0,29664496 |  |
| 226110_at    | PTAR1            | 3,680249569  | 3,977034308  | -0,29678474 |  |
| 233759_s_at  | SMEK2            | 3,277429131  | 3,574237491  | -0,29680836 |  |
| 1555000_at   | OK/SW-CL.36      | -1,838812296 | -1,541908042 | -0,29690425 |  |
| 1556513_at   | ZNF573           | -1,838812296 | -1,541908042 | -0,29690425 |  |
| 1558649_at   | LOC145757        | -1,838812296 | -1,541908042 | -0,29690425 |  |
| 1559711_at   | FAM120A          | -1,838812296 | -1,541908042 | -0,29690425 |  |
| 210862_s_at  | SARDH            | -1,838812296 | -1,541908042 | -0,29690425 |  |
| 218510_x_at  | FAM134B          | -1,838812296 | -1,541908042 | -0,29690425 |  |
| 220462_at    | CSRNP3           | -1,838812296 | -1,541908042 | -0,29690425 |  |
| 220601_at    | C16orf70         | -1,838812296 | -1,541908042 | -0,29690425 |  |
| 227855_at    | ARHGEF40         | -1,838812296 | -1,541908042 | -0,29690425 |  |
| 230580_at    | -                | -1,838812296 | -1,541908042 | -0,29690425 |  |
| 233527_at    | LOC100129069     | -1,838812296 | -1,541908042 | -0,29690425 |  |
| 234964_at    | YME1L1           | -1,838812296 | -1,541908042 | -0,29690425 |  |
| 237728_at    | -                | -1,838812296 | -1,541908042 | -0,29690425 |  |
| 238802_at    | TYSND1           | -1,838812296 | -1,541908042 | -0,29690425 |  |
| 240017_at    | PCBP1-AS1        | -1,838812296 | -1,541908042 | -0,29690425 |  |

|              |                 |              |              |             |  |
|--------------|-----------------|--------------|--------------|-------------|--|
| 240190_at    | -               | -1,838812296 | -1,541908042 | -0,29690425 |  |
| 240394_at    | -               | -1,838812296 | -1,541908042 | -0,29690425 |  |
| 243599_at    | LOC100507226    | -1,838812296 | -1,541908042 | -0,29690425 |  |
| 243739_at    | -               | -1,838812296 | -1,541908042 | -0,29690425 |  |
| 228151_at    | ARL15           | 1,709647566  | 2,006570641  | -0,29692308 |  |
| 213444_at    | ZNF862          | 0,984222186  | 1,281471383  | -0,2972492  |  |
| 210647_x_at  | PLA2G6          | 2,305800198  | 2,603119255  | -0,29731906 |  |
| 212081_x_at  | PRRC2A          | 2,478200152  | 2,775606361  | -0,29740621 |  |
| 203906_at    | IQSEC1          | 1,446464021  | 1,743944487  | -0,29748047 |  |
| 201005_at    | CD9 /// LOC1006 | 1,493160564  | 1,790660532  | -0,29749997 |  |
| 219987_at    | ERVMER34-1      | 1,638726528  | 1,936283387  | -0,29755686 |  |
| 214656_x_at  | MYO1C           | 2,630440446  | 2,928263672  | -0,29782323 |  |
| 204508_s_at  | CA12            | -1,518072576 | -1,220210588 | -0,29786199 |  |
| 207626_s_at  | SLC7A2          | -1,518072576 | -1,220210588 | -0,29786199 |  |
| 215428_at    | -               | -1,518072576 | -1,220210588 | -0,29786199 |  |
| 216718_at    | LINC00302       | -1,518072576 | -1,220210588 | -0,29786199 |  |
| 217681_at    | WNT7B           | -1,518072576 | -1,220210588 | -0,29786199 |  |
| 227596_at    | FLJ37453        | -1,518072576 | -1,220210588 | -0,29786199 |  |
| 230981_at    | CATSPER3        | -1,518072576 | -1,220210588 | -0,29786199 |  |
| 231099_at    | FKBP15          | -1,518072576 | -1,220210588 | -0,29786199 |  |
| 232831_at    | -               | -1,518072576 | -1,220210588 | -0,29786199 |  |
| 235388_at    | CHD9            | -1,518072576 | -1,220210588 | -0,29786199 |  |
| 236643_s_at  | -               | -1,518072576 | -1,220210588 | -0,29786199 |  |
| 236926_at    | TBX1            | -1,518072576 | -1,220210588 | -0,29786199 |  |
| 242801_at    | -               | -1,518072576 | -1,220210588 | -0,29786199 |  |
| 242982_x_at  | ITGB8           | -1,518072576 | -1,220210588 | -0,29786199 |  |
| 244665_at    | -               | -1,518072576 | -1,220210588 | -0,29786199 |  |
| 1562775_at   | NUDT12          | -2,384869671 | -2,086984744 | -0,29788493 |  |
| 1570516_s_at | OR51B5          | -2,384869671 | -2,086984744 | -0,29788493 |  |
| 206065_s_at  | DPYS            | -2,384869671 | -2,086984744 | -0,29788493 |  |
| 210354_at    | IFNG            | -2,384869671 | -2,086984744 | -0,29788493 |  |
| 211618_s_at  | ALPI            | -2,384869671 | -2,086984744 | -0,29788493 |  |
| 213277_at    | ZFP36L1         | -2,384869671 | -2,086984744 | -0,29788493 |  |
| 216005_at    | TNC             | -2,384869671 | -2,086984744 | -0,29788493 |  |
| 229196_at    | FAM111A         | -2,384869671 | -2,086984744 | -0,29788493 |  |
| 231755_at    | IL36B           | -2,384869671 | -2,086984744 | -0,29788493 |  |
| 233717_x_at  | -               | -2,384869671 | -2,086984744 | -0,29788493 |  |
| 237184_at    | -               | -2,384869671 | -2,086984744 | -0,29788493 |  |
| 238548_at    | -               | -2,384869671 | -2,086984744 | -0,29788493 |  |
| 239765_at    | -               | -2,384869671 | -2,086984744 | -0,29788493 |  |
| 239775_at    | -               | -2,384869671 | -2,086984744 | -0,29788493 |  |
| 240883_at    | PFKFB1          | -2,384869671 | -2,086984744 | -0,29788493 |  |
| 242509_at    | -               | -2,384869671 | -2,086984744 | -0,29788493 |  |
| 244240_at    | -               | -2,384869671 | -2,086984744 | -0,29788493 |  |
| 1553352_x_at | ERVW-1          | -1,308181863 | -1,010192375 | -0,29798949 |  |
| 1553489_a_at | TEKT5           | -1,308181863 | -1,010192375 | -0,29798949 |  |
| 207368_at    | HTR1D           | -1,308181863 | -1,010192375 | -0,29798949 |  |
| 210059_s_at  | MAPK13          | -1,308181863 | -1,010192375 | -0,29798949 |  |
| 217652_at    | MAU2            | -1,308181863 | -1,010192375 | -0,29798949 |  |
| 224236_s_at  | -               | -1,308181863 | -1,010192375 | -0,29798949 |  |
| 230103_at    | VSTM4           | -1,308181863 | -1,010192375 | -0,29798949 |  |
| 230126_s_at  | KDM4B           | -1,308181863 | -1,010192375 | -0,29798949 |  |
| 232431_at    | NR3C1           | -1,308181863 | -1,010192375 | -0,29798949 |  |
| 234555_at    | EPPK1           | -1,308181863 | -1,010192375 | -0,29798949 |  |
| 235404_at    | ARID5B          | -1,308181863 | -1,010192375 | -0,29798949 |  |
| 236100_at    | FBXO10          | -1,308181863 | -1,010192375 | -0,29798949 |  |

|              |                 |              |              |             |  |
|--------------|-----------------|--------------|--------------|-------------|--|
| 236144_at    | CPXM2           | -1,308181863 | -1,010192375 | -0,29798949 |  |
| 236778_at    | -               | -1,308181863 | -1,010192375 | -0,29798949 |  |
| 239864_at    | LOC100130175    | -1,308181863 | -1,010192375 | -0,29798949 |  |
| 243023_at    | -               | -1,308181863 | -1,010192375 | -0,29798949 |  |
| 243355_at    | LOC100131316    | -1,308181863 | -1,010192375 | -0,29798949 |  |
| 244404_at    | STXBP4          | -1,308181863 | -1,010192375 | -0,29798949 |  |
| 1558959_at   | FAM126B         | -0,759588698 | -0,461594427 | -0,29799427 |  |
| 205572_at    | ANGPT2          | -0,759588698 | -0,461594427 | -0,29799427 |  |
| 209663_s_at  | ITGA7           | -0,759588698 | -0,461594427 | -0,29799427 |  |
| 213674_x_at  | IGHD            | -0,759588698 | -0,461594427 | -0,29799427 |  |
| 232465_at    | -               | -0,759588698 | -0,461594427 | -0,29799427 |  |
| 236393_at    | -               | -0,759588698 | -0,461594427 | -0,29799427 |  |
| 229934_at    | -               | 3,069741844  | 3,367892567  | -0,29815072 |  |
| 217703_x_at  | -               | 2,535098095  | 2,833274877  | -0,29817678 |  |
| 224812_at    | HIBADH          | 2,369762403  | 2,667949403  | -0,298187   |  |
| 227227_at    | -               | 2,361396186  | 2,659583735  | -0,29818755 |  |
| 205942_s_at  | ACSM3           | 1,292162421  | 1,590454215  | -0,29829179 |  |
| 239896_at    | LOC100289098    | 1,143956113  | 1,442269454  | -0,29831334 |  |
| 215050_x_at  | MAPKAPK2        | 0,767063567  | 1,065442793  | -0,29837923 |  |
| 222186_at    | -               | 0,767063567  | 1,065442793  | -0,29837923 |  |
| 231024_at    | PGM5-AS1        | 0,715481152  | 1,013870809  | -0,29838966 |  |
| 218811_at    | ORAI2           | 0,702292136  | 1,000684521  | -0,29839239 |  |
| 220097_s_at  | TMEM104         | 0,661985843  | 0,960386719  | -0,29840088 |  |
| 201794_s_at  | SMG7            | 3,052955227  | 3,351366359  | -0,29841113 |  |
| 1564031_a_at | RELL2           | 0,606430281  | 0,904843258  | -0,29841298 |  |
| 212400_at    | FAM102A         | 0,606430281  | 0,904843258  | -0,29841298 |  |
| 214738_s_at  | NEK9            | 0,606430281  | 0,904843258  | -0,29841298 |  |
| 225660_at    | SEMA6A          | 0,606430281  | 0,904843258  | -0,29841298 |  |
| 219591_at    | CEND1           | 0,57782909   | 0,876248481  | -0,29841939 |  |
| 239081_at    | -               | 0,57782909   | 0,876248481  | -0,29841939 |  |
| 228240_at    | AGAP1           | 0,518867317  | 0,817300337  | -0,29843302 |  |
| 216375_s_at  | ETV5            | 0,457392764  | 0,755840599  | -0,29844784 |  |
| 209195_s_at  | ADCY6           | 0,425644434  | 0,724100169  | -0,29845574 |  |
| 243866_x_at  | -               | 0,291166226  | 0,589657387  | -0,29849116 |  |
| 218822_s_at  | NPEPL1 /// STX1 | 0,255492549  | 0,553993624  | -0,29850108 |  |
| 204243_at    | RLF             | 2,654607516  | 2,953119918  | -0,2985124  |  |
| 224813_at    | WASL            | 3,072307152  | 3,370970266  | -0,29866311 |  |
| 228434_at    | BTNL9           | 2,009141686  | 2,307890888  | -0,2987492  |  |
| 204783_at    | MLF1            | 2,857110344  | 3,155865206  | -0,29875486 |  |
| 224775_at    | IWS1            | 1,560488174  | 1,859476797  | -0,29898862 |  |
| 225110_at    | OGFOD1          | 3,556534813  | 3,855584709  | -0,2990499  |  |
| 65438_at     | KIAA1609        | -1,775177781 | -1,475984457 | -0,29919332 |  |
| 227029_at    | FAM177A1        | 1,079110292  | 1,378453643  | -0,29934335 |  |
| 202332_at    | CSNK1E          | 2,259277178  | 2,558821855  | -0,29954468 |  |
| 218125_s_at  | CCDC25          | 2,876321464  | 3,175947691  | -0,29962623 |  |
| 227621_at    | -               | 2,791679321  | 3,091398163  | -0,29971884 |  |
| 223593_at    | AADAT           | 1,496984567  | 1,796776588  | -0,29979202 |  |
| 242877_at    | -               | 1,434549838  | 1,73441697   | -0,29986713 |  |
| 1554114_s_at | SSH2            | -0,622910612 | -0,322870281 | -0,30004033 |  |
| 1565814_at   | TRIM36          | -0,622910612 | -0,322870281 | -0,30004033 |  |
| 236900_x_at  | CCDC163P        | -0,622910612 | -0,322870281 | -0,30004033 |  |
| 1554362_at   | BTG4            | -2,756478458 | -2,456406426 | -0,30007203 |  |
| 1554784_at   | CNTN1           | -2,756478458 | -2,456406426 | -0,30007203 |  |
| 1556190_s_at | LOC100507516 /  | -2,756478458 | -2,456406426 | -0,30007203 |  |
| 1557793_at   | ESYT3           | -2,756478458 | -2,456406426 | -0,30007203 |  |
| 1564151_at   | -               | -2,756478458 | -2,456406426 | -0,30007203 |  |



|              |              |              |              |             |  |
|--------------|--------------|--------------|--------------|-------------|--|
| 1564318_at   | POLR3A       | -2,756478458 | -2,456406426 | -0,30007203 |  |
| 1565130_at   | MAP3K2       | -2,756478458 | -2,456406426 | -0,30007203 |  |
| 213765_at    | MFAP5        | -2,756478458 | -2,456406426 | -0,30007203 |  |
| 214652_at    | DRD1         | -2,756478458 | -2,456406426 | -0,30007203 |  |
| 215976_at    | -            | -2,756478458 | -2,456406426 | -0,30007203 |  |
| 216420_at    | -            | -2,756478458 | -2,456406426 | -0,30007203 |  |
| 219834_at    | ALS2CR8      | -2,756478458 | -2,456406426 | -0,30007203 |  |
| 231520_at    | SLC35F3      | -2,756478458 | -2,456406426 | -0,30007203 |  |
| 233600_at    | EFCAB6       | -2,756478458 | -2,456406426 | -0,30007203 |  |
| 235104_at    | ERAP2        | -2,756478458 | -2,456406426 | -0,30007203 |  |
| 238692_at    | BTBD11       | -2,756478458 | -2,456406426 | -0,30007203 |  |
| 239164_at    | -            | -2,756478458 | -2,456406426 | -0,30007203 |  |
| 240051_at    | TPD52L3      | -2,756478458 | -2,456406426 | -0,30007203 |  |
| 240979_at    | LOC284100    | -2,756478458 | -2,456406426 | -0,30007203 |  |
| 241139_at    | -            | -2,756478458 | -2,456406426 | -0,30007203 |  |
| 242564_at    | -            | -2,756478458 | -2,456406426 | -0,30007203 |  |
| 244638_at    | SUCLG1       | -2,756478458 | -2,456406426 | -0,30007203 |  |
| 1552516_a_at | HIPK1        | -0,946847173 | -0,646746079 | -0,30010109 |  |
| 1553087_at   | C18orf12     | -0,946847173 | -0,646746079 | -0,30010109 |  |
| 205973_at    | FEZ1         | -0,946847173 | -0,646746079 | -0,30010109 |  |
| 207680_x_at  | PAX3         | -0,946847173 | -0,646746079 | -0,30010109 |  |
| 207923_x_at  | PAX8         | -0,946847173 | -0,646746079 | -0,30010109 |  |
| 209030_s_at  | CADM1        | -0,946847173 | -0,646746079 | -0,30010109 |  |
| 225009_at    | CMTM4        | -0,946847173 | -0,646746079 | -0,30010109 |  |
| 239458_at    | ALS2CR12     | -0,946847173 | -0,646746079 | -0,30010109 |  |
| 241419_at    | ARHGAP1      | -0,946847173 | -0,646746079 | -0,30010109 |  |
| 243913_at    | -            | -0,946847173 | -0,646746079 | -0,30010109 |  |
| 244338_at    | LDLRAD3      | -0,946847173 | -0,646746079 | -0,30010109 |  |
| 201422_at    | IFI30        | 1,990274687  | 2,290658654  | -0,30038397 |  |
| 216272_x_at  | SYDE1        | 0,133056859  | 0,433557298  | -0,30050044 |  |
| 230321_at    | TOR1AIP2     | 0,133056859  | 0,433557298  | -0,30050044 |  |
| 224706_at    | KIAA2013     | 2,983784569  | 3,284389368  | -0,3006048  |  |
| 1554445_at   | ZNF85        | 0,052199481  | 0,352836757  | -0,30063728 |  |
| 1562743_at   | ZNF33B       | 0,052199481  | 0,352836757  | -0,30063728 |  |
| 205296_at    | RBL1         | 0,052199481  | 0,352836757  | -0,30063728 |  |
| 232545_at    | LRRC29       | -0,352479422 | -0,05178616  | -0,30069326 |  |
| 1554985_at   | ZNF396       | -1,964176657 | -1,663414495 | -0,30076216 |  |
| 1556699_at   | -            | -1,964176657 | -1,663414495 | -0,30076216 |  |
| 1563571_at   | LOC285463    | -1,964176657 | -1,663414495 | -0,30076216 |  |
| 1567682_x_at | SNORA74A     | -1,964176657 | -1,663414495 | -0,30076216 |  |
| 209597_s_at  | PNMA2        | -1,964176657 | -1,663414495 | -0,30076216 |  |
| 214393_at    | RND2         | -1,964176657 | -1,663414495 | -0,30076216 |  |
| 216477_at    | -            | -1,964176657 | -1,663414495 | -0,30076216 |  |
| 225727_at    | PLEKHH1      | -1,964176657 | -1,663414495 | -0,30076216 |  |
| 230564_at    | SIPA1L3      | -1,964176657 | -1,663414495 | -0,30076216 |  |
| 231546_at    | -            | -1,964176657 | -1,663414495 | -0,30076216 |  |
| 241551_at    | -            | -1,964176657 | -1,663414495 | -0,30076216 |  |
| 241911_at    | CDKL3        | -1,964176657 | -1,663414495 | -0,30076216 |  |
| 208859_s_at  | ATRX         | -0,033456564 | 0,26733076   | -0,30078732 |  |
| 233061_at    | FITM2        | -0,033456564 | 0,26733076   | -0,30078732 |  |
| 219946_x_at  | MYH14        | 1,331241794  | 1,632095957  | -0,30085416 |  |
| 1557394_at   | DLGAP4       | -0,078265071 | 0,222599095  | -0,30086417 |  |
| 209964_s_at  | ATXN7        | -0,078265071 | 0,222599095  | -0,30086417 |  |
| 238093_at    | LOC100129722 | -0,078265071 | 0,222599095  | -0,30086417 |  |
| 204997_at    | GPD1         | -0,496991414 | -0,19610998  | -0,30088143 |  |
| 211817_s_at  | KCNJ5        | -0,496991414 | -0,19610998  | -0,30088143 |  |

|              |                |              |              |             |  |
|--------------|----------------|--------------|--------------|-------------|--|
| 219480_at    | SNAI1          | -0,496991414 | -0,19610998  | -0,30088143 |  |
| 230503_at    | -              | -0,496991414 | -0,19610998  | -0,30088143 |  |
| 242793_at    | -              | -0,496991414 | -0,19610998  | -0,30088143 |  |
| 228937_at    | LACC1          | 0,779676066  | 1,080561626  | -0,30088556 |  |
| 1561179_s_at | AMZ1           | -0,172274514 | 0,128747141  | -0,30102165 |  |
| 205640_at    | ALDH3B1        | -0,172274514 | 0,128747141  | -0,30102165 |  |
| 219475_at    | OSGIN1         | -0,172274514 | 0,128747141  | -0,30102165 |  |
| 239489_at    | -              | -0,172274514 | 0,128747141  | -0,30102165 |  |
| 227491_at    | ELOVL6         | 1,621313976  | 1,922365006  | -0,30105103 |  |
| 237555_at    | CARS2          | -0,221656139 | 0,079428135  | -0,30108427 |  |
| 1557353_at   | -              | -0,43775896  | -0,136643983 | -0,30111498 |  |
| 205166_at    | CAPN5          | -0,43775896  | -0,136643983 | -0,30111498 |  |
| 214103_s_at  | RAP2A          | -0,43775896  | -0,136643983 | -0,30111498 |  |
| 216538_at    | -              | -0,43775896  | -0,136643983 | -0,30111498 |  |
| 221747_at    | TNS1           | -0,43775896  | -0,136643983 | -0,30111498 |  |
| 243377_at    | -              | -0,43775896  | -0,136643983 | -0,30111498 |  |
| 1569132_s_at | ARSK           | 0,648296226  | 0,949447784  | -0,30115156 |  |
| 220344_at    | C11orf16       | 0,648296226  | 0,949447784  | -0,30115156 |  |
| 1554613_a_at | KIAA0226       | -0,325749314 | -0,024572586 | -0,30117673 |  |
| 203736_s_at  | PPFIBP1        | -0,325749314 | -0,024572586 | -0,30117673 |  |
| 208224_at    | HOXB1          | -0,325749314 | -0,024572586 | -0,30117673 |  |
| 230568_x_at  | DLL3           | -0,325749314 | -0,024572586 | -0,30117673 |  |
| 231251_at    | WIPF2          | -0,325749314 | -0,024572586 | -0,30117673 |  |
| 232640_at    | COMMD5         | -0,325749314 | -0,024572586 | -0,30117673 |  |
| 233877_at    | -              | -0,325749314 | -0,024572586 | -0,30117673 |  |
| 1554923_at   | ANKS6          | -2,262747984 | -1,961547147 | -0,30120084 |  |
| 1559257_a_at | MAGI1          | -2,262747984 | -1,961547147 | -0,30120084 |  |
| 210909_x_at  | LPAL2          | -2,262747984 | -1,961547147 | -0,30120084 |  |
| 231394_at    | -              | -2,262747984 | -1,961547147 | -0,30120084 |  |
| 234149_at    | -              | -2,262747984 | -1,961547147 | -0,30120084 |  |
| 235522_at    | CLEC2D         | -2,262747984 | -1,961547147 | -0,30120084 |  |
| 237106_at    | SLC11A2        | -2,262747984 | -1,961547147 | -0,30120084 |  |
| 237969_at    | -              | -2,262747984 | -1,961547147 | -0,30120084 |  |
| 241236_at    | -              | -2,262747984 | -1,961547147 | -0,30120084 |  |
| 242204_at    | WFDC5          | -2,262747984 | -1,961547147 | -0,30120084 |  |
| 244378_at    | C12orf51       | -2,262747984 | -1,961547147 | -0,30120084 |  |
| 224568_x_at  | LOC100507645 / | 2,44295215   | 2,744302548  | -0,3013504  |  |
| 202606_s_at  | TLK1           | 3,588248178  | 3,889604025  | -0,30135585 |  |
| 225273_at    | WWC3           | 1,473887017  | 1,775255987  | -0,30136897 |  |
| 241692_at    | -              | 0,533835206  | 0,835239052  | -0,30140385 |  |
| 205571_at    | LIPT1          | 1,995690482  | 2,297144887  | -0,3014544  |  |
| 223201_s_at  | TMEM164        | 1,426552034  | 1,728030156  | -0,30147812 |  |
| 241737_x_at  | -              | 1,426552034  | 1,728030156  | -0,30147812 |  |
| 225923_at    | VAPB           | 1,951783949  | 2,253342112  | -0,30155816 |  |
| 202276_at    | SHFM1          | 5,323023912  | 5,624678706  | -0,30165479 |  |
| 209341_s_at  | IKBB           | 2,718233611  | 3,019999252  | -0,30176564 |  |
| 204998_s_at  | ATF5           | 2,658027143  | 2,959949103  | -0,30192196 |  |
| 40465_at     | DDX23          | 2,237727891  | 2,539803567  | -0,30207568 |  |
| 211833_s_at  | BAX            | 1,655931423  | 1,958277216  | -0,30234579 |  |
| 200623_s_at  | CALM1 /// CALM | 4,017604437  | 4,319980141  | -0,3023757  |  |
| 211285_s_at  | UBE3A          | 4,300164033  | 4,602542772  | -0,30237874 |  |
| 1554440_at   | KIAA0513       | -2,089474779 | -1,787089803 | -0,30238498 |  |
| 1554986_a_at | SNX19          | -2,089474779 | -1,787089803 | -0,30238498 |  |
| 1556471_at   | SCML4          | -2,089474779 | -1,787089803 | -0,30238498 |  |
| 1561384_a_at | LOC284661      | -2,089474779 | -1,787089803 | -0,30238498 |  |
| 1569063_at   | -              | -2,089474779 | -1,787089803 | -0,30238498 |  |

|              |                 |              |              |             |  |
|--------------|-----------------|--------------|--------------|-------------|--|
| 209904_at    | TNNC1           | -2,089474779 | -1,787089803 | -0,30238498 |  |
| 210433_at    | POFUT1          | -2,089474779 | -1,787089803 | -0,30238498 |  |
| 215264_at    | EMX1            | -2,089474779 | -1,787089803 | -0,30238498 |  |
| 235836_at    | MXRA7           | -2,089474779 | -1,787089803 | -0,30238498 |  |
| 236661_at    | IQCF6           | -2,089474779 | -1,787089803 | -0,30238498 |  |
| 236662_at    | -               | -2,089474779 | -1,787089803 | -0,30238498 |  |
| 238658_at    | -               | -2,089474779 | -1,787089803 | -0,30238498 |  |
| 241133_at    | TRBV27          | -2,089474779 | -1,787089803 | -0,30238498 |  |
| 243804_at    | MTMR7           | -2,089474779 | -1,787089803 | -0,30238498 |  |
| 1555687_a_at | CLEC4C          | -3,192553003 | -2,89013181  | -0,30242119 |  |
| 1557823_s_at | LOC401134       | -3,192553003 | -2,89013181  | -0,30242119 |  |
| 1560230_at   | -               | -3,192553003 | -2,89013181  | -0,30242119 |  |
| 221950_at    | EMX2            | -3,192553003 | -2,89013181  | -0,30242119 |  |
| 235228_at    | CCDC85A         | -3,192553003 | -2,89013181  | -0,30242119 |  |
| 242814_at    | SERPINB9        | -3,192553003 | -2,89013181  | -0,30242119 |  |
| 243311_at    | DEFB132         | -3,192553003 | -2,89013181  | -0,30242119 |  |
| 219176_at    | C2orf47         | 4,076291169  | 4,378751229  | -0,30246006 |  |
| 219345_at    | BOLA1           | 1,614289682  | 1,916759838  | -0,30247016 |  |
| 204748_at    | PTGS2           | 1,339784194  | 1,642321262  | -0,30253707 |  |
| 221571_at    | TRAF3           | 2,429008604  | 2,731588328  | -0,30257972 |  |
| 226554_at    | ZBTB7A          | 2,837639949  | 3,140317145  | -0,3026772  |  |
| 204436_at    | PLEKHO2         | 1,946200473  | 2,248887791  | -0,30268732 |  |
| 210124_x_at  | SEMA4F          | 1,269985355  | 1,572742379  | -0,30275702 |  |
| 221572_s_at  | SLC26A6         | 0,934330293  | 1,23718272   | -0,30285243 |  |
| 224635_s_at  | BIRC6           | 3,439206878  | 3,742106442  | -0,30289956 |  |
| 218699_at    | RAB7L1          | 2,410880861  | 2,713921281  | -0,30304042 |  |
| 205836_s_at  | YTHDC2          | 0,46522187   | 0,768343791  | -0,30312192 |  |
| 241941_at    | -               | 0,46522187   | 0,768343791  | -0,30312192 |  |
| 1562509_at   | -               | -1,353583928 | -1,050406615 | -0,30317731 |  |
| 208135_at    | HNF1B           | -1,353583928 | -1,050406615 | -0,30317731 |  |
| 210420_at    | SLC24A1         | -1,353583928 | -1,050406615 | -0,30317731 |  |
| 211910_at    | -               | -1,353583928 | -1,050406615 | -0,30317731 |  |
| 216754_at    | -               | -1,353583928 | -1,050406615 | -0,30317731 |  |
| 226796_at    | ABHD15          | -1,353583928 | -1,050406615 | -0,30317731 |  |
| 229345_at    | RTN4RL2         | -1,353583928 | -1,050406615 | -0,30317731 |  |
| 233426_at    | -               | -1,353583928 | -1,050406615 | -0,30317731 |  |
| 233687_s_at  | KLK9            | -1,353583928 | -1,050406615 | -0,30317731 |  |
| 238950_at    | TNFRSF9         | -1,353583928 | -1,050406615 | -0,30317731 |  |
| 240259_at    | FLRT2 /// LOC10 | -1,353583928 | -1,050406615 | -0,30317731 |  |
| 244320_at    | NHLRC2          | -1,353583928 | -1,050406615 | -0,30317731 |  |
| 211701_s_at  | TRO             | 1,139070151  | 1,442269454  | -0,3031993  |  |
| 211919_s_at  | CXCR4           | 1,139070151  | 1,442269454  | -0,3031993  |  |
| 203286_at    | RNF44           | 2,472384965  | 2,775606361  | -0,3032214  |  |
| 1556609_at   | LOC401098       | -2,712026959 | -2,408705138 | -0,30332182 |  |
| 1561054_a_at | CCDC14          | -2,712026959 | -2,408705138 | -0,30332182 |  |
| 1563569_at   | -               | -2,712026959 | -2,408705138 | -0,30332182 |  |
| 1568941_a_at | HNRNPC /// LOC  | -2,712026959 | -2,408705138 | -0,30332182 |  |
| 207584_at    | LPA             | -2,712026959 | -2,408705138 | -0,30332182 |  |
| 207729_at    | CDH9            | -2,712026959 | -2,408705138 | -0,30332182 |  |
| 209601_at    | ACOX1           | -2,712026959 | -2,408705138 | -0,30332182 |  |
| 217568_at    | EDDM3A          | -2,712026959 | -2,408705138 | -0,30332182 |  |
| 232124_at    | FAM198A         | -2,712026959 | -2,408705138 | -0,30332182 |  |
| 232251_at    | NUDT16P1        | -2,712026959 | -2,408705138 | -0,30332182 |  |
| 235629_at    | -               | -2,712026959 | -2,408705138 | -0,30332182 |  |
| 237402_at    | -               | -2,712026959 | -2,408705138 | -0,30332182 |  |
| 238873_at    | -               | -2,712026959 | -2,408705138 | -0,30332182 |  |

|              |                   |              |              |             |  |
|--------------|-------------------|--------------|--------------|-------------|--|
| 243619_at    | FGFR1OP2          | -2,712026959 | -2,408705138 | -0,30332182 |  |
| 244714_at    | -                 | -2,712026959 | -2,408705138 | -0,30332182 |  |
| 210589_s_at  | GBAP1             | 1,90937145   | 2,212749286  | -0,30337784 |  |
| 1552889_a_at | EXOC3L2           | 2,185368281  | 2,488772006  | -0,30340373 |  |
| 200964_at    | UBA1              | 4,738838553  | 5,042268267  | -0,30342971 |  |
| 209014_at    | MAGED1            | 6,127786839  | 6,431256109  | -0,30346927 |  |
| 229593_at    | H2AFY             | 0,334552598  | 0,638150376  | -0,30359778 |  |
| 227882_at    | FKRP              | 1,493160564  | 1,796776588  | -0,30361602 |  |
| 222493_s_at  | ZFAND3            | 1,67631007   | 1,979940779  | -0,30363071 |  |
| 225594_at    | CREBZF            | 2,31665944   | 2,620464265  | -0,30380483 |  |
| 1552256_a_at | SCARB1            | 2,390468117  | 2,694398145  | -0,30393003 |  |
| 1557943_at   | CNP               | 0,228146222  | 0,532164371  | -0,30401815 |  |
| 212760_at    | UBR2              | 2,830080806  | 3,134292219  | -0,30421141 |  |
| 219108_x_at  | DDX27 /// SS18    | 3,231115193  | 3,535445117  | -0,30432992 |  |
| 231312_at    | -                 | 0,152582607  | 0,456918297  | -0,30433569 |  |
| 218841_at    | ASB8              | 1,094335495  | 1,398700978  | -0,30436548 |  |
| 222667_s_at  | ASH1L             | 1,799091453  | 2,103505212  | -0,30441376 |  |
| 1564407_a_at | -                 | -0,79540287  | -0,490927335 | -0,30447553 |  |
| 1569461_at   | KCNT1             | -0,79540287  | -0,490927335 | -0,30447553 |  |
| 207894_s_at  | TCL6              | -0,79540287  | -0,490927335 | -0,30447553 |  |
| 210881_s_at  | IGF2 /// INS-IGF2 | -0,79540287  | -0,490927335 | -0,30447553 |  |
| 217170_at    | -                 | -0,79540287  | -0,490927335 | -0,30447553 |  |
| 219621_at    | CLSPN             | -0,79540287  | -0,490927335 | -0,30447553 |  |
| 235486_at    | C11orf41          | -0,79540287  | -0,490927335 | -0,30447553 |  |
| 235608_at    | -                 | -0,79540287  | -0,490927335 | -0,30447553 |  |
| 241892_at    | NCL               | -0,79540287  | -0,490927335 | -0,30447553 |  |
| 1557186_s_at | TPCN1             | 0,810733188  | 1,115234684  | -0,3045015  |  |
| 211018_at    | LSS               | 0,072842263  | 0,377530647  | -0,30468838 |  |
| 235054_at    | NUDT16            | 0,072842263  | 0,377530647  | -0,30468838 |  |
| 213567_at    | KPNA4             | 1,735773781  | 2,040470494  | -0,30469671 |  |
| 224489_at    | KANSL1            | 1,011212064  | 1,315948728  | -0,30473666 |  |
| 221025_x_at  | PUS7L             | 1,560488174  | 1,865308541  | -0,30482037 |  |
| 1554142_at   | SUGT1P3           | -3,482633686 | -3,177802286 | -0,3048314  |  |
| 203690_at    | TUBGCP3           | 3,219589925  | 3,524430539  | -0,30484061 |  |
| 1553130_at   | LOC652276         | 0,03125738   | 0,336136178  | -0,3048788  |  |
| 1555848_at   | -                 | 0,03125738   | 0,336136178  | -0,3048788  |  |
| 216938_x_at  | DRD2              | 0,03125738   | 0,336136178  | -0,3048788  |  |
| 1552913_at   | MAGEB18           | -3,342483913 | -3,037500868 | -0,30498305 |  |
| 1561553_at   | -                 | -3,342483913 | -3,037500868 | -0,30498305 |  |
| 1567182_at   | -                 | -3,342483913 | -3,037500868 | -0,30498305 |  |
| 38069_at     | CLCN7             | 2,271607525  | 2,576704359  | -0,30509683 |  |
| 222628_s_at  | REV1              | 1,485482016  | 1,790660532  | -0,30517852 |  |
| 227215_at    | GOPC              | 1,485482016  | 1,790660532  | -0,30517852 |  |
| 225604_s_at  | GLIPR2 /// LOC1   | -0,055687482 | 0,249604176  | -0,30529166 |  |
| 233313_at    | -                 | -0,055687482 | 0,249604176  | -0,30529166 |  |
| 219163_at    | ZNF562            | 2,35929703   | 2,664608955  | -0,30531193 |  |
| 1555981_at   | C17orf65          | 0,627515113  | 0,932882274  | -0,30536716 |  |
| 225744_at    | ZDHHC8            | 0,627515113  | 0,932882274  | -0,30536716 |  |
| 1568649_at   | -                 | 1,238353345  | 1,543943227  | -0,30558988 |  |
| 202672_s_at  | ATF3              | 1,238353345  | 1,543943227  | -0,30558988 |  |
| 239238_at    | -                 | 0,57058931   | 0,876248481  | -0,30565917 |  |
| 1555041_a_at | NAGA              | 2,097427503  | 2,403170156  | -0,30574265 |  |
| 1558590_at   | METTL17           | -0,148196756 | 0,157549243  | -0,305746   |  |
| 212151_at    | PBX1              | -0,148196756 | 0,157549243  | -0,305746   |  |
| 214138_at    | ZNF79             | -0,148196756 | 0,157549243  | -0,305746   |  |
| 239251_at    | -                 | -0,148196756 | 0,157549243  | -0,305746   |  |

|              |              |              |              |             |  |
|--------------|--------------|--------------|--------------|-------------|--|
| 234201_x_at  | -            | 0,541261317  | 0,847075464  | -0,30581415 |  |
| 241899_at    | LOC553103    | 0,541261317  | 0,847075464  | -0,30581415 |  |
| 235501_at    | -            | -0,196756757 | 0,109221392  | -0,30597815 |  |
| 231788_at    | LPAR5        | 1,163336153  | 1,469325098  | -0,30598894 |  |
| 213140_s_at  | SS18L1       | 2,596981013  | 2,902971658  | -0,30599064 |  |
| 211519_s_at  | KIF2C        | 2,589836943  | 2,895866687  | -0,30602974 |  |
| 232242_at    | LOC100506994 | 0,480753764  | 0,786897721  | -0,30614396 |  |
| 1566839_at   | LOC283674    | -0,655928373 | -0,34958478  | -0,30634359 |  |
| 205384_at    | FXYD1        | -0,655928373 | -0,34958478  | -0,30634359 |  |
| 207384_at    | PGLYRP1      | -0,655928373 | -0,34958478  | -0,30634359 |  |
| 215205_x_at  | NCOR2        | -0,655928373 | -0,34958478  | -0,30634359 |  |
| 229578_at    | JPH2         | -0,655928373 | -0,34958478  | -0,30634359 |  |
| 238326_at    | ODF3B        | -0,655928373 | -0,34958478  | -0,30634359 |  |
| 203641_s_at  | COBLL1       | -0,299034815 | 0,007421914  | -0,30645673 |  |
| 216975_x_at  | NPAS1        | -0,299034815 | 0,007421914  | -0,30645673 |  |
| 221147_x_at  | WVOX         | -0,299034815 | 0,007421914  | -0,30645673 |  |
| 228724_at    | TTLL7        | -0,299034815 | 0,007421914  | -0,30645673 |  |
| 1561739_at   | -            | -0,986356909 | -0,679763839 | -0,30659307 |  |
| 207214_at    | SPINK4       | -0,986356909 | -0,679763839 | -0,30659307 |  |
| 207296_at    | ZNF343       | -0,986356909 | -0,679763839 | -0,30659307 |  |
| 207897_at    | CRHR2        | -0,986356909 | -0,679763839 | -0,30659307 |  |
| 208243_s_at  | CNR1         | -0,986356909 | -0,679763839 | -0,30659307 |  |
| 211789_s_at  | MLXIP        | -0,986356909 | -0,679763839 | -0,30659307 |  |
| 215842_s_at  | ATP11A       | -0,986356909 | -0,679763839 | -0,30659307 |  |
| 231082_at    | -            | -0,986356909 | -0,679763839 | -0,30659307 |  |
| 237512_at    | -            | -0,986356909 | -0,679763839 | -0,30659307 |  |
| 243279_at    | -            | -0,986356909 | -0,679763839 | -0,30659307 |  |
| 221969_at    | PAX5         | 1,369290453  | 1,675891488  | -0,30660104 |  |
| 1560630_at   | -            | -0,352951799 | -0,046302147 | -0,30664965 |  |
| 201045_s_at  | RAB6A        | -0,352951799 | -0,046302147 | -0,30664965 |  |
| 1556126_s_at | -            | 0,384950573  | 0,691645685  | -0,30669511 |  |
| 225952_at    | FLYWCH1      | 0,384950573  | 0,691645685  | -0,30669511 |  |
| 224918_x_at  | MGST1        | 3,722507547  | 4,029266691  | -0,30675914 |  |
| 1568596_a_at | TROAP        | 1,699726954  | 2,006570641  | -0,30684369 |  |
| 203103_s_at  | PRPF19       | 3,372081975  | 3,678940066  | -0,30685809 |  |
| 1569930_at   | -            | -0,59053611  | -0,283667828 | -0,30686828 |  |
| 210264_at    | GPR35        | -0,59053611  | -0,283667828 | -0,30686828 |  |
| 228496_s_at  | CRIM1        | -0,59053611  | -0,283667828 | -0,30686828 |  |
| 230513_at    | BAG6         | -0,59053611  | -0,283667828 | -0,30686828 |  |
| 233142_at    | -            | -0,59053611  | -0,283667828 | -0,30686828 |  |
| 205037_at    | IFT27        | 1,990274687  | 2,297144887  | -0,3068702  |  |
| 204672_s_at  | ANKRD6       | 0,351548291  | 0,658444279  | -0,30689599 |  |
| 209334_s_at  | PSMD9        | 0,351548291  | 0,658444279  | -0,30689599 |  |
| 215977_x_at  | GK           | 1,318332599  | 1,6252386    | -0,306906   |  |
| 1553989_a_at | ATP6V1C2     | -0,467091869 | -0,160136748 | -0,30695512 |  |
| 1556835_s_at | LOC100652770 | -0,467091869 | -0,160136748 | -0,30695512 |  |
| 1557128_at   | FAM111B      | -0,467091869 | -0,160136748 | -0,30695512 |  |
| 219202_at    | RHBDF2       | -0,467091869 | -0,160136748 | -0,30695512 |  |
| 219379_x_at  | ZNF358       | -0,467091869 | -0,160136748 | -0,30695512 |  |
| 220045_at    | NEUROD6      | -0,467091869 | -0,160136748 | -0,30695512 |  |
| 240765_at    | -            | -0,467091869 | -0,160136748 | -0,30695512 |  |
| 1558383_at   | KPNA4        | -3,15396682  | -2,847001814 | -0,30696501 |  |
| 1560748_at   | -            | -3,15396682  | -2,847001814 | -0,30696501 |  |
| 1561016_at   | -            | -3,15396682  | -2,847001814 | -0,30696501 |  |
| 1562283_at   | -            | -3,15396682  | -2,847001814 | -0,30696501 |  |
| 1563454_at   | SOX6         | -3,15396682  | -2,847001814 | -0,30696501 |  |

|              |                 |              |              |             |  |
|--------------|-----------------|--------------|--------------|-------------|--|
| 231612_at    | CABS1           | -3,15396682  | -2,847001814 | -0,30696501 |  |
| 237566_at    | -               | -3,15396682  | -2,847001814 | -0,30696501 |  |
| 237651_x_at  | LINC00518       | -3,15396682  | -2,847001814 | -0,30696501 |  |
| 241340_at    | -               | -3,15396682  | -2,847001814 | -0,30696501 |  |
| 1554172_a_at | ZMYM3           | 0,317354302  | 0,624460759  | -0,30710646 |  |
| 226553_at    | TMPRSS2         | 0,317354302  | 0,624460759  | -0,30710646 |  |
| 238566_at    | -               | 0,317354302  | 0,624460759  | -0,30710646 |  |
| 217354_s_at  | HPS1            | 1,283332461  | 1,590454215  | -0,30712175 |  |
| 227232_at    | EVL             | 0,747935635  | 1,055274826  | -0,30733919 |  |
| 214594_x_at  | ATP8B1          | 1,247462054  | 1,55481039   | -0,30734834 |  |
| 214054_at    | DOK2            | 0,246434561  | 0,553993624  | -0,30755906 |  |
| 1553070_a_at | MYOZ3           | -1,639579028 | -1,332017329 | -0,3075617  |  |
| 1559295_at   | -               | -1,639579028 | -1,332017329 | -0,3075617  |  |
| 1562068_at   | -               | -1,639579028 | -1,332017329 | -0,3075617  |  |
| 1562468_at   | -               | -1,639579028 | -1,332017329 | -0,3075617  |  |
| 208173_at    | IFNB1           | -1,639579028 | -1,332017329 | -0,3075617  |  |
| 221118_at    | PKD2L2          | -1,639579028 | -1,332017329 | -0,3075617  |  |
| 221372_s_at  | P2RX2           | -1,639579028 | -1,332017329 | -0,3075617  |  |
| 226101_at    | PRKCE           | -1,639579028 | -1,332017329 | -0,3075617  |  |
| 232904_at    | SLC7A14         | -1,639579028 | -1,332017329 | -0,3075617  |  |
| 238763_at    | RBM20           | -1,639579028 | -1,332017329 | -0,3075617  |  |
| 240264_at    | -               | -1,639579028 | -1,332017329 | -0,3075617  |  |
| 244170_at    | RAB3C           | -1,639579028 | -1,332017329 | -0,3075617  |  |
| 221804_s_at  | FAM45A /// FAM4 | 2,503131904  | 2,810785576  | -0,30765367 |  |
| 218806_s_at  | VAV3            | 1,191926657  | 1,499637023  | -0,30771037 |  |
| 232066_x_at  | CTBP1-AS1       | 1,191926657  | 1,499637023  | -0,30771037 |  |
| 222280_at    | LOC100506469    | 3,818840142  | 4,126559358  | -0,30771922 |  |
| 212534_at    | ZNF24           | 3,450096885  | 3,757867094  | -0,30777021 |  |
| 229428_at    | TIMM23          | 0,209623097  | 0,51742585   | -0,30780275 |  |
| 202590_s_at  | PDK2            | 0,641402394  | 0,949447784  | -0,30804539 |  |
| 223233_s_at  | CGN             | 0,171847695  | 0,479907041  | -0,30805935 |  |
| 1552592_at   | MMP21           | -2,64318869  | -2,335104118 | -0,30808457 |  |
| 1554929_at   | SIK3            | -2,64318869  | -2,335104118 | -0,30808457 |  |
| 1560109_s_at | -               | -2,64318869  | -2,335104118 | -0,30808457 |  |
| 1562469_at   | LINC00340       | -2,64318869  | -2,335104118 | -0,30808457 |  |
| 1565846_at   | -               | -2,64318869  | -2,335104118 | -0,30808457 |  |
| 1568970_at   | ADAM18          | -2,64318869  | -2,335104118 | -0,30808457 |  |
| 1570269_at   | -               | -2,64318869  | -2,335104118 | -0,30808457 |  |
| 204885_s_at  | MSLN            | -2,64318869  | -2,335104118 | -0,30808457 |  |
| 207036_x_at  | GRIN2D          | -2,64318869  | -2,335104118 | -0,30808457 |  |
| 210292_s_at  | PCDH11X /// PC  | -2,64318869  | -2,335104118 | -0,30808457 |  |
| 214068_at    | BEAN1           | -2,64318869  | -2,335104118 | -0,30808457 |  |
| 216096_s_at  | NRXN1           | -2,64318869  | -2,335104118 | -0,30808457 |  |
| 220037_s_at  | LYVE1           | -2,64318869  | -2,335104118 | -0,30808457 |  |
| 220328_at    | PHC3            | -2,64318869  | -2,335104118 | -0,30808457 |  |
| 226701_at    | GJA5            | -2,64318869  | -2,335104118 | -0,30808457 |  |
| 229093_at    | NOS3            | -2,64318869  | -2,335104118 | -0,30808457 |  |
| 231403_at    | TRIO            | -2,64318869  | -2,335104118 | -0,30808457 |  |
| 232544_at    | -               | -2,64318869  | -2,335104118 | -0,30808457 |  |
| 233468_at    | -               | -2,64318869  | -2,335104118 | -0,30808457 |  |
| 234614_at    | FLI1            | -2,64318869  | -2,335104118 | -0,30808457 |  |
| 234865_at    | IL23A           | -2,64318869  | -2,335104118 | -0,30808457 |  |
| 238769_at    | -               | -2,64318869  | -2,335104118 | -0,30808457 |  |
| 238803_at    | HECTD2          | -2,64318869  | -2,335104118 | -0,30808457 |  |
| 239580_at    | GUCY1A3         | -2,64318869  | -2,335104118 | -0,30808457 |  |
| 240253_at    | -               | -2,64318869  | -2,335104118 | -0,30808457 |  |

|              |                 |              |              |             |  |
|--------------|-----------------|--------------|--------------|-------------|--|
| 241169_at    | -               | -2,64318869  | -2,335104118 | -0,30808457 |  |
| 243822_at    | -               | -2,64318869  | -2,335104118 | -0,30808457 |  |
| 1557455_s_at | MOSPD1          | 1,394109935  | 1,702196344  | -0,30808641 |  |
| 222244_s_at  | TUG1            | 3,986661073  | 4,294812548  | -0,30815148 |  |
| 212945_s_at  | MGA             | 3,059434754  | 3,367892567  | -0,30845781 |  |
| 202600_s_at  | NRIP1           | 1,556829052  | 1,865308541  | -0,30847949 |  |
| 204524_at    | PDPK1           | 2,422991296  | 2,731588328  | -0,30859703 |  |
| 228917_at    | -               | 0,555999837  | 0,864649967  | -0,30865013 |  |
| 204069_at    | MEIS1           | 0,882651021  | 1,191491281  | -0,30884026 |  |
| 230292_at    | -               | 2,915422315  | 3,22439681   | -0,3089745  |  |
| 227185_at    | C1orf233        | 0,496120222  | 0,805216064  | -0,30909584 |  |
| 208661_s_at  | TTC3 /// TTC3P1 | 3,886725813  | 4,195885363  | -0,30915955 |  |
| 231844_at    | MGC27345        | 2,994644467  | 3,303845028  | -0,30920056 |  |
| 32069_at     | N4BP1           | 3,028064153  | 3,337273593  | -0,30920944 |  |
| 200000_s_at  | PRPF8           | 3,872077355  | 4,181349409  | -0,30927205 |  |
| 203340_s_at  | SLC25A12        | 1,339784194  | 1,64909809   | -0,3093139  |  |
| 220367_s_at  | SAP130          | 2,531373922  | 2,840694075  | -0,30932015 |  |
| 203279_at    | EDEM1           | 2,201862497  | 2,511262629  | -0,30940013 |  |
| 1557334_a_at | FERMT1          | -2,930741289 | -2,621331989 | -0,3094093  |  |
| 1560850_at   | -               | -2,930741289 | -2,621331989 | -0,3094093  |  |
| 1561477_at   | CCDC144A        | -2,930741289 | -2,621331989 | -0,3094093  |  |
| 1563325_at   | -               | -2,930741289 | -2,621331989 | -0,3094093  |  |
| 1568696_at   | CDNF            | -2,930741289 | -2,621331989 | -0,3094093  |  |
| 1568785_a_at | LOC100505709    | -2,930741289 | -2,621331989 | -0,3094093  |  |
| 1569225_a_at | SCML4           | -2,930741289 | -2,621331989 | -0,3094093  |  |
| 1570146_at   | -               | -2,930741289 | -2,621331989 | -0,3094093  |  |
| 207240_s_at  | LHCGR           | -2,930741289 | -2,621331989 | -0,3094093  |  |
| 211207_s_at  | ACSL6 /// LOC10 | -2,930741289 | -2,621331989 | -0,3094093  |  |
| 215846_at    | -               | -2,930741289 | -2,621331989 | -0,3094093  |  |
| 224370_s_at  | CAPS2           | -2,930741289 | -2,621331989 | -0,3094093  |  |
| 233434_at    | -               | -2,930741289 | -2,621331989 | -0,3094093  |  |
| 233485_at    | -               | -2,930741289 | -2,621331989 | -0,3094093  |  |
| 234825_at    | -               | -2,930741289 | -2,621331989 | -0,3094093  |  |
| 237488_at    | -               | -2,930741289 | -2,621331989 | -0,3094093  |  |
| 229022_at    | ZFX             | 1,748661581  | 2,058399602  | -0,30973802 |  |
| 220837_at    | -               | -3,448416261 | -3,138626879 | -0,30978938 |  |
| 225383_at    | ZNF275          | 1,954567604  | 2,264418116  | -0,30985051 |  |
| 1563315_s_at | ERICH1          | 2,562727117  | 2,87289275   | -0,31016563 |  |
| 211543_s_at  | GRK6            | 0,984222186  | 1,294497133  | -0,31027495 |  |
| 1557002_x_at | ESPNL           | 0,123193849  | 0,433557298  | -0,31036345 |  |
| 209608_s_at  | ACAT2           | 4,591035503  | 4,901439515  | -0,31040401 |  |
| 202852_s_at  | AAGAB           | 2,292660284  | 2,603119255  | -0,31045897 |  |
| 213199_at    | C2CD3           | 0,962260738  | 1,272721751  | -0,31046101 |  |
| 218605_at    | TFB2M           | 4,803569495  | 5,114131207  | -0,31056171 |  |
| 1563867_at   | LOC283194       | 0,083054335  | 0,393761504  | -0,31070717 |  |
| 222670_s_at  | MAFB            | 0,083054335  | 0,393761504  | -0,31070717 |  |
| 1564701_at   | -               | -1,688127507 | -1,377419394 | -0,31070811 |  |
| 1567054_at   | OR1C1           | -1,688127507 | -1,377419394 | -0,31070811 |  |
| 203453_at    | SCNN1A          | -1,688127507 | -1,377419394 | -0,31070811 |  |
| 206925_at    | ST8SIA4         | -1,688127507 | -1,377419394 | -0,31070811 |  |
| 207973_x_at  | ACRV1           | -1,688127507 | -1,377419394 | -0,31070811 |  |
| 214806_at    | BICD1           | -1,688127507 | -1,377419394 | -0,31070811 |  |
| 216927_at    | MAU2            | -1,688127507 | -1,377419394 | -0,31070811 |  |
| 221276_s_at  | SYNC            | -1,688127507 | -1,377419394 | -0,31070811 |  |
| 221354_s_at  | MCHR1           | -1,688127507 | -1,377419394 | -0,31070811 |  |
| 232614_at    | -               | -1,688127507 | -1,377419394 | -0,31070811 |  |

|             |                 |              |              |             |  |
|-------------|-----------------|--------------|--------------|-------------|--|
| 233500_x_at | CLEC2D          | -1,688127507 | -1,377419394 | -0,31070811 |  |
| 233834_at   | -               | -1,688127507 | -1,377419394 | -0,31070811 |  |
| 237763_at   | -               | -1,688127507 | -1,377419394 | -0,31070811 |  |
| 242418_at   | C2orf27A        | -1,688127507 | -1,377419394 | -0,31070811 |  |
| 243774_at   | MUC20           | -1,688127507 | -1,377419394 | -0,31070811 |  |
| 244689_at   | PPARA           | -1,688127507 | -1,377419394 | -0,31070811 |  |
| 214433_s_at | SELENBP1        | 2,580856819  | 2,891586849  | -0,31073003 |  |
| 201383_s_at | NBR1            | 0,779676066  | 1,090553537  | -0,31087747 |  |
| 201809_s_at | ENG             | 1,530951994  | 1,841838775  | -0,31088678 |  |
| 1552386_at  | GAPT            | -2,597496523 | -2,286583451 | -0,31091307 |  |
| 1560628_at  | -               | -2,597496523 | -2,286583451 | -0,31091307 |  |
| 1563840_at  | -               | -2,597496523 | -2,286583451 | -0,31091307 |  |
| 206442_at   | SEMG1           | -2,597496523 | -2,286583451 | -0,31091307 |  |
| 210657_s_at | 38231           | -2,597496523 | -2,286583451 | -0,31091307 |  |
| 210914_at   | -               | -2,597496523 | -2,286583451 | -0,31091307 |  |
| 214602_at   | COL4A4          | -2,597496523 | -2,286583451 | -0,31091307 |  |
| 214761_at   | ZNF423          | -2,597496523 | -2,286583451 | -0,31091307 |  |
| 215402_at   | APPBP2          | -2,597496523 | -2,286583451 | -0,31091307 |  |
| 220407_s_at | TGFB2           | -2,597496523 | -2,286583451 | -0,31091307 |  |
| 237069_s_at | TRPM1           | -2,597496523 | -2,286583451 | -0,31091307 |  |
| 242537_at   | -               | -2,597496523 | -2,286583451 | -0,31091307 |  |
| 225933_at   | CCDC137         | 2,559073676  | 2,869995113  | -0,31092144 |  |
| 218164_at   | SPATA20         | 0,457392764  | 0,768343791  | -0,31095103 |  |
| 229549_at   | CALU            | 2,331726354  | 2,64270545   | -0,3109791  |  |
| 202436_s_at | CYP1B1          | -1,424023738 | -1,112851844 | -0,31117189 |  |
| 202760_s_at | AKAP2 /// PALM2 | -1,424023738 | -1,112851844 | -0,31117189 |  |
| 207501_s_at | FGF12           | -1,424023738 | -1,112851844 | -0,31117189 |  |
| 210598_at   | -               | -1,424023738 | -1,112851844 | -0,31117189 |  |
| 213924_at   | GNAL            | -1,424023738 | -1,112851844 | -0,31117189 |  |
| 215995_x_at | -               | -1,424023738 | -1,112851844 | -0,31117189 |  |
| 216235_s_at | EDNRA           | -1,424023738 | -1,112851844 | -0,31117189 |  |
| 216453_at   | ZNF287          | -1,424023738 | -1,112851844 | -0,31117189 |  |
| 219305_x_at | FBXO2           | -1,424023738 | -1,112851844 | -0,31117189 |  |
| 220693_at   | CCDC82          | -1,424023738 | -1,112851844 | -0,31117189 |  |
| 223688_s_at | LY6K            | -1,424023738 | -1,112851844 | -0,31117189 |  |
| 230446_at   | LOC100506130    | -1,424023738 | -1,112851844 | -0,31117189 |  |
| 231720_s_at | JAM3            | -1,424023738 | -1,112851844 | -0,31117189 |  |
| 232281_at   | LOC148189       | -1,424023738 | -1,112851844 | -0,31117189 |  |
| 232472_at   | -               | -1,424023738 | -1,112851844 | -0,31117189 |  |
| 235077_at   | MEG3            | -1,424023738 | -1,112851844 | -0,31117189 |  |
| 240929_at   | LOC100128750    | -1,424023738 | -1,112851844 | -0,31117189 |  |
| 241771_at   | RIMBP2          | -1,424023738 | -1,112851844 | -0,31117189 |  |
| 203575_at   | CSNK2A2         | 3,27186005   | 3,583111417  | -0,31125137 |  |
| 216392_s_at | SEC23IP         | 2,864529541  | 3,175947691  | -0,31141815 |  |
| 221082_s_at | NDRG3           | 1,835789711  | 2,147243253  | -0,31145354 |  |
| 221302_at   | KLF15           | -0,00073712  | 0,310717132  | -0,31145425 |  |
| 231090_s_at | ARID2           | -0,00073712  | 0,310717132  | -0,31145425 |  |
| 236384_at   | C17orf85        | -0,00073712  | 0,310717132  | -0,31145425 |  |
| 235333_at   | B4GALT6         | 2,127340679  | 2,438805127  | -0,31146445 |  |
| 205134_s_at | NUFIP1          | 2,369762403  | 2,681234383  | -0,31147198 |  |
| 229073_at   | PRTG            | 1,079110292  | 1,390636111  | -0,31152582 |  |
| 203580_s_at | SLC7A6          | 2,009141686  | 2,320681318  | -0,31153963 |  |
| 230903_s_at | C8orf42         | 2,218170265  | 2,529740643  | -0,31157038 |  |
| 231819_at   | LOC100505876    | 0,702292136  | 1,013870809  | -0,31157867 |  |
| 235414_at   | ZNF383          | 1,799091453  | 2,110887591  | -0,31179614 |  |
| 1556956_at  | KCP             | 0,934330293  | 1,246149888  | -0,3118196  |  |



|              |                 |              |              |             |  |
|--------------|-----------------|--------------|--------------|-------------|--|
| 220730_at    | -               | 0,934330293  | 1,246149888  | -0,3118196  |  |
| 205213_at    | ACAP1           | -1,131062212 | -0,819238336 | -0,31182388 |  |
| 214008_at    | TWF1            | -1,131062212 | -0,819238336 | -0,31182388 |  |
| 215248_at    | GRB10           | -1,131062212 | -0,819238336 | -0,31182388 |  |
| 215306_at    | -               | -1,131062212 | -0,819238336 | -0,31182388 |  |
| 227938_s_at  | DLL1            | -1,131062212 | -0,819238336 | -0,31182388 |  |
| 229154_at    | WNT10A          | -1,131062212 | -0,819238336 | -0,31182388 |  |
| 230887_at    | CDC14B          | -1,131062212 | -0,819238336 | -0,31182388 |  |
| 236674_at    | LOC388780       | -1,131062212 | -0,819238336 | -0,31182388 |  |
| 237260_at    | LOC100505978    | -1,131062212 | -0,819238336 | -0,31182388 |  |
| 239027_at    | DOCK8           | -1,131062212 | -0,819238336 | -0,31182388 |  |
| 241065_x_at  | CMAS            | -1,131062212 | -0,819238336 | -0,31182388 |  |
| 224286_at    | C1QTNF5 /// MFI | 1,037706275  | 1,349621332  | -0,31191506 |  |
| 227120_at    | FOXP4           | 1,037706275  | 1,349621332  | -0,31191506 |  |
| 207604_s_at  | SLC4A7          | 0,911589958  | 1,223626587  | -0,31203663 |  |
| 214838_at    | SFT2D2          | 0,888485433  | 1,200746069  | -0,31226064 |  |
| 1552785_at   | ZNF781          | -0,089689931 | 0,222599095  | -0,31228903 |  |
| 1561107_at   | -               | -0,089689931 | 0,222599095  | -0,31228903 |  |
| 205875_s_at  | TREX1           | -0,089689931 | 0,222599095  | -0,31228903 |  |
| 224904_at    | -               | 3,085065712  | 3,39737216   | -0,31230645 |  |
| 226026_at    | DIRC2           | 1,373456798  | 1,685812099  | -0,3123553  |  |
| 219096_at    | ARMC7           | 1,187200746  | 1,499637023  | -0,31243628 |  |
| 202312_s_at  | COL1A1          | -0,926850548 | -0,614371577 | -0,31247897 |  |
| 205553_s_at  | CSRP3           | -0,926850548 | -0,614371577 | -0,31247897 |  |
| 207005_s_at  | BCL2            | -0,926850548 | -0,614371577 | -0,31247897 |  |
| 228939_at    | OAF             | -0,926850548 | -0,614371577 | -0,31247897 |  |
| 229847_at    | MAPK1           | -0,926850548 | -0,614371577 | -0,31247897 |  |
| 231751_at    | ABCG8           | -0,926850548 | -0,614371577 | -0,31247897 |  |
| 235606_at    | LOC344595       | -0,926850548 | -0,614371577 | -0,31247897 |  |
| 244374_at    | PLAC2           | -0,926850548 | -0,614371577 | -0,31247897 |  |
| 204201_s_at  | PTPN13          | -0,136301282 | 0,176436073  | -0,31273736 |  |
| 215807_s_at  | PLXNB1          | -0,136301282 | 0,176436073  | -0,31273736 |  |
| 224855_at    | PYCR2           | 2,758612869  | 3,071356473  | -0,3127436  |  |
| 206967_at    | CCNT1           | 0,255492549  | 0,568365095  | -0,31287255 |  |
| 207076_s_at  | ASS1            | 0,255492549  | 0,568365095  | -0,31287255 |  |
| 209376_x_at  | SCAF11          | 2,470441349  | 2,783327323  | -0,31288597 |  |
| 208621_s_at  | EZR             | 2,254767157  | 2,567790814  | -0,31302366 |  |
| 219566_at    | PLEKHF1         | 2,254767157  | 2,567790814  | -0,31302366 |  |
| 204538_x_at  | NPIP            | 3,833280332  | 4,146452482  | -0,31317215 |  |
| 223831_x_at  | ISY1            | 2,582657321  | 2,895866687  | -0,31320937 |  |
| 228548_at    | RAP1A           | 0,792179257  | 1,105412836  | -0,31323358 |  |
| 210736_x_at  | DTNA            | 0,533835206  | 0,847075464  | -0,31324026 |  |
| 222545_s_at  | C10orf57        | 0,503742507  | 0,817300337  | -0,31355783 |  |
| 226169_at    | SBF2            | 0,503742507  | 0,817300337  | -0,31355783 |  |
| 216449_x_at  | HSP90B1         | 4,408689531  | 4,72225126   | -0,31356173 |  |
| 200859_x_at  | FLNA            | 3,634114217  | 3,947788666  | -0,31367445 |  |
| 215372_x_at  | -               | -0,234278768 | 0,079428135  | -0,3137069  |  |
| 220219_s_at  | LRRC37A /// LRF | -0,234278768 | 0,079428135  | -0,3137069  |  |
| 241458_at    | -               | -0,234278768 | 0,079428135  | -0,3137069  |  |
| 225415_at    | DTX3L           | 3,158127685  | 3,471887144  | -0,31375946 |  |
| 212378_at    | GART            | 4,814336575  | 5,12814465   | -0,31380808 |  |
| 218758_s_at  | RRP1            | 4,572581135  | 4,88646247   | -0,31388133 |  |
| 1554892_a_at | MS4A3           | 0,945567441  | 1,259496994  | -0,31392955 |  |
| 226033_at    | USP31           | 0,945567441  | 1,259496994  | -0,31392955 |  |
| 1560433_at   | -               | -0,033454628 | 0,28048534   | -0,31393997 |  |
| 1553798_a_at | FBXL13          | 1,58584542   | 1,899812471  | -0,31396705 |  |

|              |                |              |              |             |  |
|--------------|----------------|--------------|--------------|-------------|--|
| 203657_s_at  | CTSF           | 0,715481152  | 1,029536893  | -0,31405574 |  |
| 225399_at    | TSEN15         | 3,854300588  | 4,168435485  | -0,3141349  |  |
| 1568850_at   | CCBP2          | -0,285837228 | 0,028364014  | -0,31420124 |  |
| 231300_at    | C16orf93       | -0,285837228 | 0,028364014  | -0,31420124 |  |
| 222162_s_at  | ADAMTS1        | 0,44160593   | 0,755840599  | -0,31423467 |  |
| 219357_at    | GTPBP1         | 2,094906514  | 2,409170778  | -0,31426426 |  |
| 1557795_s_at | NTRK3          | 0,103263601  | 0,417770464  | -0,31450686 |  |
| 244433_at    | -              | 0,103263601  | 0,417770464  | -0,31450686 |  |
| 226188_at    | LGALS1         | 0,661985843  | 0,976641161  | -0,31465532 |  |
| 230312_at    | -              | 2,540666392  | 2,855418981  | -0,31475259 |  |
| 1554101_a_at | TMTC4          | -0,85085127  | -0,536087151 | -0,31476412 |  |
| 1561433_at   | CCDC74B-AS1    | -0,85085127  | -0,536087151 | -0,31476412 |  |
| 205402_x_at  | PRSS2          | -0,85085127  | -0,536087151 | -0,31476412 |  |
| 208267_at    | TRPV5          | -0,85085127  | -0,536087151 | -0,31476412 |  |
| 219059_s_at  | LYVE1          | -0,85085127  | -0,536087151 | -0,31476412 |  |
| 219878_s_at  | KLF13          | -0,85085127  | -0,536087151 | -0,31476412 |  |
| 233146_at    | KNDC1          | -0,85085127  | -0,536087151 | -0,31476412 |  |
| 1556300_s_at | SIM1           | -3,41365796  | -3,098858316 | -0,31479964 |  |
| 1565799_at   | RAB3IP         | -3,41365796  | -3,098858316 | -0,31479964 |  |
| 220432_s_at  | CYP39A1        | -3,41365796  | -3,098858316 | -0,31479964 |  |
| 204064_at    | THOC1          | 3,333038605  | 3,647981081  | -0,31494248 |  |
| 208873_s_at  | REEP5          | 3,312571045  | 3,62753841   | -0,31496736 |  |
| 224002_s_at  | FKBP7          | 1,496984567  | 1,811954245  | -0,31496968 |  |
| 232489_at    | TRMT13         | 0,376672223  | 0,691645685  | -0,31497346 |  |
| 217734_s_at  | WDR6           | 2,929639344  | 3,244672787  | -0,31503344 |  |
| 1553457_at   | LINC00269      | -0,394749123 | -0,079522948 | -0,31522618 |  |
| 206516_at    | AMH            | -0,394749123 | -0,079522948 | -0,31522618 |  |
| 226573_at    | DIRAS1         | -0,394749123 | -0,079522948 | -0,31522618 |  |
| 243773_at    | PDCD2          | 0,82905153   | 1,144305291  | -0,31525376 |  |
| 1566887_x_at | -              | 2,173470163  | 2,488772006  | -0,31530184 |  |
| 230016_at    | LOC100506538 / | 1,326951551  | 1,642321262  | -0,31536971 |  |
| 242276_at    | -              | 1,326951551  | 1,642321262  | -0,31536971 |  |
| 222406_s_at  | PNRC2          | 3,199783157  | 3,515187047  | -0,31540389 |  |
| 212017_at    | FAM168B        | 3,159334685  | 3,474751011  | -0,31541633 |  |
| 49679_s_at   | -              | 0,465221875  | 0,780739553  | -0,31551768 |  |
| 218344_s_at  | RCOR3          | 0,57782909   | 0,893473268  | -0,31564418 |  |
| 243303_at    | -              | 0,57782909   | 0,893473268  | -0,31564418 |  |
| 202822_at    | LPP            | 2,009141686  | 2,324919719  | -0,31577803 |  |
| 1559728_at   | ZBTB40         | 0,30867765   | 0,624460759  | -0,31578311 |  |
| 211391_s_at  | PATZ1          | 0,30867765   | 0,624460759  | -0,31578311 |  |
| 1554444_s_at | C2orf18        | 1,549482847  | 1,865308541  | -0,31582569 |  |
| 221274_s_at  | LMAN2L         | 2,755423794  | 3,071356473  | -0,31593268 |  |
| 1556841_a_at | ALDH1L2        | -1,470833215 | -1,154897679 | -0,31593554 |  |
| 1562052_at   | -              | -1,470833215 | -1,154897679 | -0,31593554 |  |
| 206569_at    | IL24           | -1,470833215 | -1,154897679 | -0,31593554 |  |
| 210206_s_at  | DDX11          | -1,470833215 | -1,154897679 | -0,31593554 |  |
| 211898_s_at  | EPHB1          | -1,470833215 | -1,154897679 | -0,31593554 |  |
| 226219_at    | ARHGAP30       | -1,470833215 | -1,154897679 | -0,31593554 |  |
| 226708_at    | -              | -1,470833215 | -1,154897679 | -0,31593554 |  |
| 230576_at    | BLOC1S3        | -1,470833215 | -1,154897679 | -0,31593554 |  |
| 231267_at    | LOC100506206   | -1,470833215 | -1,154897679 | -0,31593554 |  |
| 231469_at    | NTRK3-AS1      | -1,470833215 | -1,154897679 | -0,31593554 |  |
| 233119_at    | PRR5L          | -1,470833215 | -1,154897679 | -0,31593554 |  |
| 233762_at    | -              | -1,470833215 | -1,154897679 | -0,31593554 |  |
| 234147_at    | LOC286059      | -1,470833215 | -1,154897679 | -0,31593554 |  |
| 234610_at    | HSPA12B        | -1,470833215 | -1,154897679 | -0,31593554 |  |

|              |                  |              |              |             |  |
|--------------|------------------|--------------|--------------|-------------|--|
| 235839_at    | C22orf34         | -1,470833215 | -1,154897679 | -0,31593554 |  |
| 238216_at    | LOC100506258     | -1,470833215 | -1,154897679 | -0,31593554 |  |
| 238249_at    | -                | -1,470833215 | -1,154897679 | -0,31593554 |  |
| 239226_at    | -                | -1,470833215 | -1,154897679 | -0,31593554 |  |
| 241624_at    | LOC389834        | -1,470833215 | -1,154897679 | -0,31593554 |  |
| 243152_at    | COPS8            | -1,470833215 | -1,154897679 | -0,31593554 |  |
| 226670_s_at  | PABPC1L          | 2,589836943  | 2,905803877  | -0,31596693 |  |
| 203759_at    | ST3GAL4          | -0,022466681 | 0,293518836  | -0,31598552 |  |
| 220426_at    | C20orf195        | -0,022466681 | 0,293518836  | -0,31598552 |  |
| 227610_at    | TSPAN11          | -0,022466681 | 0,293518836  | -0,31598552 |  |
| 241454_at    | -                | -0,022466681 | 0,293518836  | -0,31598552 |  |
| 208991_at    | STAT3            | 4,823501972  | 5,139619179  | -0,31611721 |  |
| 205813_s_at  | MAT1A            | -0,512251684 | -0,19610998  | -0,3161417  |  |
| 231953_at    | BPTF             | -0,512251684 | -0,19610998  | -0,3161417  |  |
| 207671_s_at  | BEST1            | -0,706943342 | -0,39061235  | -0,31633099 |  |
| 210020_x_at  | CALML3           | -0,706943342 | -0,39061235  | -0,31633099 |  |
| 235179_at    | ZNF641           | -0,706943342 | -0,39061235  | -0,31633099 |  |
| 236493_at    | NKAPP1           | -0,706943342 | -0,39061235  | -0,31633099 |  |
| 239267_at    | NEK6             | -0,706943342 | -0,39061235  | -0,31633099 |  |
| 240105_at    | -                | -0,706943342 | -0,39061235  | -0,31633099 |  |
| 240797_at    | PERP             | -0,706943342 | -0,39061235  | -0,31633099 |  |
| 244752_at    | ZNF438           | -0,706943342 | -0,39061235  | -0,31633099 |  |
| 1555902_at   | ARMCX5           | -0,57445847  | -0,258114234 | -0,31634424 |  |
| 220484_at    | MCOLN3           | -0,57445847  | -0,258114234 | -0,31634424 |  |
| 232031_s_at  | EPG5             | -0,57445847  | -0,258114234 | -0,31634424 |  |
| 238721_at    | MDH1B            | -0,57445847  | -0,258114234 | -0,31634424 |  |
| 241060_x_at  | -                | -0,57445847  | -0,258114234 | -0,31634424 |  |
| 222826_at    | PLDN             | 2,553576109  | 2,869995113  | -0,316419   |  |
| 226295_at    | ITFG2 /// LOC100 | 1,238353345  | 1,55481039   | -0,31645705 |  |
| 206238_s_at  | YAF2             | 1,073999308  | 1,390636111  | -0,3166368  |  |
| 203600_s_at  | FAM193A          | 1,473887017  | 1,790660532  | -0,31677351 |  |
| 222663_at    | RIOK2            | 0,798390451  | 1,115234684  | -0,31684423 |  |
| 1559927_a_at | LOC728353        | -1,047650486 | -0,730778808 | -0,31687168 |  |
| 214928_at    | OBSL1            | -1,047650486 | -0,730778808 | -0,31687168 |  |
| 217044_s_at  | PLEKHG3          | -1,047650486 | -0,730778808 | -0,31687168 |  |
| 220630_s_at  | CHIA             | -1,047650486 | -0,730778808 | -0,31687168 |  |
| 235596_at    | -                | -1,047650486 | -0,730778808 | -0,31687168 |  |
| 239378_at    | PITRM1           | -1,047650486 | -0,730778808 | -0,31687168 |  |
| 239505_at    | -                | -1,047650486 | -0,730778808 | -0,31687168 |  |
| 223802_s_at  | RBBP6            | 2,669932407  | 2,986947093  | -0,31701469 |  |
| 1553612_at   | ZNF354B          | -0,112808516 | 0,204310755  | -0,31711927 |  |
| 224046_s_at  | PDE7A            | -0,112808516 | 0,204310755  | -0,31711927 |  |
| 209461_x_at  | WDR18            | 2,493593689  | 2,810785576  | -0,31719189 |  |
| 1553838_at   | C4orf45          | -2,479842156 | -2,162639771 | -0,31720238 |  |
| 1554601_at   | NKAIN2           | -2,479842156 | -2,162639771 | -0,31720238 |  |
| 1556368_at   | PHKG2            | -2,479842156 | -2,162639771 | -0,31720238 |  |
| 1562642_at   | -                | -2,479842156 | -2,162639771 | -0,31720238 |  |
| 1562684_at   | -                | -2,479842156 | -2,162639771 | -0,31720238 |  |
| 207063_at    | NCRNA00185 ///   | -2,479842156 | -2,162639771 | -0,31720238 |  |
| 211861_x_at  | CD28             | -2,479842156 | -2,162639771 | -0,31720238 |  |
| 213968_at    | -                | -2,479842156 | -2,162639771 | -0,31720238 |  |
| 219580_s_at  | TMC5             | -2,479842156 | -2,162639771 | -0,31720238 |  |
| 229670_at    | -                | -2,479842156 | -2,162639771 | -0,31720238 |  |
| 235079_at    | ZNF704           | -2,479842156 | -2,162639771 | -0,31720238 |  |
| 237527_at    | -                | -2,479842156 | -2,162639771 | -0,31720238 |  |
| 240525_at    | -                | -2,479842156 | -2,162639771 | -0,31720238 |  |

|              |              |              |              |             |  |
|--------------|--------------|--------------|--------------|-------------|--|
| 241039_at    | -            | -2,479842156 | -2,162639771 | -0,31720238 |  |
| 243864_at    | CCDC80       | -2,479842156 | -2,162639771 | -0,31720238 |  |
| 244142_at    | DTNA         | -2,479842156 | -2,162639771 | -0,31720238 |  |
| 244727_at    | KCNQ1OT1     | -2,479842156 | -2,162639771 | -0,31720238 |  |
| 232615_at    | -            | 1,426552034  | 1,743944487  | -0,31739245 |  |
| 239648_at    | DCUN1D3      | 0,928678725  | 1,246149888  | -0,31747116 |  |
| 209734_at    | NCKAP1L      | 2,912562019  | 3,23005767   | -0,31749565 |  |
| 1562378_s_at | PROM2        | 1,829737795  | 2,147243253  | -0,31750546 |  |
| 219054_at    | NPR3         | 3,771477743  | 4,08904909   | -0,31757135 |  |
| 213395_at    | MLC1         | 1,348276312  | 1,665902186  | -0,31762587 |  |
| 1559011_at   | FLJ13773     | -1,812418401 | -1,494668682 | -0,31774972 |  |
| 1560227_at   | GDPD1        | -1,812418401 | -1,494668682 | -0,31774972 |  |
| 1564259_at   | -            | -1,812418401 | -1,494668682 | -0,31774972 |  |
| 1565644_at   | -            | -1,812418401 | -1,494668682 | -0,31774972 |  |
| 201743_at    | CD14         | -1,812418401 | -1,494668682 | -0,31774972 |  |
| 209841_s_at  | LRRN3        | -1,812418401 | -1,494668682 | -0,31774972 |  |
| 216149_at    | LRRC37BP1    | -1,812418401 | -1,494668682 | -0,31774972 |  |
| 221026_s_at  | SCRT1        | -1,812418401 | -1,494668682 | -0,31774972 |  |
| 223487_x_at  | GNB4         | -1,812418401 | -1,494668682 | -0,31774972 |  |
| 224071_at    | IL20         | -1,812418401 | -1,494668682 | -0,31774972 |  |
| 231354_at    | LOC780529    | -1,812418401 | -1,494668682 | -0,31774972 |  |
| 232667_at    | -            | -1,812418401 | -1,494668682 | -0,31774972 |  |
| 233723_at    | -            | -1,812418401 | -1,494668682 | -0,31774972 |  |
| 234518_at    | -            | -1,812418401 | -1,494668682 | -0,31774972 |  |
| 234771_at    | DKFZp547J222 | -1,812418401 | -1,494668682 | -0,31774972 |  |
| 239851_at    | -            | -1,812418401 | -1,494668682 | -0,31774972 |  |
| 243330_at    | -            | -1,812418401 | -1,494668682 | -0,31774972 |  |
| 243648_at    | ZBED6        | -1,812418401 | -1,494668682 | -0,31774972 |  |
| 1552985_at   | SLC30A8      | -1,173767127 | -0,855751026 | -0,3180161  |  |
| 1557116_at   | APOL6        | -1,173767127 | -0,855751026 | -0,3180161  |  |
| 216399_s_at  | SCAPER       | -1,173767127 | -0,855751026 | -0,3180161  |  |
| 224553_s_at  | TNFRSF18     | -1,173767127 | -0,855751026 | -0,3180161  |  |
| 228109_at    | RASGRF2      | -1,173767127 | -0,855751026 | -0,3180161  |  |
| 231389_at    | CXorf41      | -1,173767127 | -0,855751026 | -0,3180161  |  |
| 234990_at    | CBX5         | -1,173767127 | -0,855751026 | -0,3180161  |  |
| 235009_at    | BOD1L1       | -1,173767127 | -0,855751026 | -0,3180161  |  |
| 242732_at    | -            | -1,173767127 | -0,855751026 | -0,3180161  |  |
| 244154_at    | DDHD1        | -1,173767127 | -0,855751026 | -0,3180161  |  |
| 235828_at    | PRELID2      | 1,314003737  | 1,632095957  | -0,31809222 |  |
| 216863_s_at  | MORC2        | 2,701760055  | 3,019999252  | -0,3182392  |  |
| 1557429_s_at | FAM227B      | -3,054236653 | -2,735862426 | -0,31837423 |  |
| 1559518_at   | HSD17B12     | -3,054236653 | -2,735862426 | -0,31837423 |  |
| 1560684_x_at | NBEAP1       | -3,054236653 | -2,735862426 | -0,31837423 |  |
| 1569983_at   | LINC00566    | -3,054236653 | -2,735862426 | -0,31837423 |  |
| 205649_s_at  | FGA          | -3,054236653 | -2,735862426 | -0,31837423 |  |
| 206965_at    | KLF12        | -3,054236653 | -2,735862426 | -0,31837423 |  |
| 226884_at    | LRRN1        | -3,054236653 | -2,735862426 | -0,31837423 |  |
| 227233_at    | TSPAN2       | -3,054236653 | -2,735862426 | -0,31837423 |  |
| 233071_at    | RSPH4A       | -3,054236653 | -2,735862426 | -0,31837423 |  |
| 237138_at    | -            | -3,054236653 | -2,735862426 | -0,31837423 |  |
| 240004_at    | -            | -3,054236653 | -2,735862426 | -0,31837423 |  |
| 240751_at    | -            | -3,054236653 | -2,735862426 | -0,31837423 |  |
| 240847_at    | -            | -3,054236653 | -2,735862426 | -0,31837423 |  |
| 244846_at    | -            | -3,054236653 | -2,735862426 | -0,31837423 |  |
| 223945_x_at  | RP9P         | 1,706348269  | 2,024923328  | -0,31857506 |  |
| 202307_s_at  | TAP1         | 1,835789711  | 2,154405725  | -0,31861601 |  |

|              |                |              |              |             |  |
|--------------|----------------|--------------|--------------|-------------|--|
| 212750_at    | PPP1R16B       | 2,201862497  | 2,520531219  | -0,31866872 |  |
| 210658_s_at  | GGA2           | 1,912238072  | 2,230931691  | -0,31869362 |  |
| 1569129_s_at | C3orf38        | 1,373456798  | 1,692388143  | -0,31893134 |  |
| 205516_x_at  | CIZ1           | 2,182996494  | 2,501934108  | -0,31893761 |  |
| 205067_at    | IL1B           | 0,641402394  | 0,960386719  | -0,31898432 |  |
| 211110_s_at  | AR             | 0,641402394  | 0,960386719  | -0,31898432 |  |
| 243442_x_at  | -              | 1,764611101  | 2,083632167  | -0,31902107 |  |
| 1558148_x_at | FLJ90757       | -0,259832361 | 0,059218869  | -0,31905123 |  |
| 205847_at    | PRSS22         | -0,259832361 | 0,059218869  | -0,31905123 |  |
| 228537_at    | GLI2           | -0,259832361 | 0,059218869  | -0,31905123 |  |
| 223712_at    | PCBD2          | 0,810733188  | 1,129843209  | -0,31911002 |  |
| 1557270_at   | -              | 1,751865623  | 2,071071048  | -0,31920543 |  |
| 203355_s_at  | PSD3           | 1,462198073  | 1,781437557  | -0,31923948 |  |
| 220023_at    | APOBR          | 0,417596971  | 0,73688026   | -0,31928329 |  |
| 224466_s_at  | MAFG           | 0,613492853  | 0,932882274  | -0,31938942 |  |
| 1553374_at   | PRO2949        | -2,823166348 | -2,503677622 | -0,31948873 |  |
| 1553849_at   | CCDC26         | -2,823166348 | -2,503677622 | -0,31948873 |  |
| 1559949_at   | -              | -2,823166348 | -2,503677622 | -0,31948873 |  |
| 1561033_at   | -              | -2,823166348 | -2,503677622 | -0,31948873 |  |
| 1561828_at   | -              | -2,823166348 | -2,503677622 | -0,31948873 |  |
| 1563533_at   | GADL1          | -2,823166348 | -2,503677622 | -0,31948873 |  |
| 1565839_a_at | -              | -2,823166348 | -2,503677622 | -0,31948873 |  |
| 206502_s_at  | INSM1          | -2,823166348 | -2,503677622 | -0,31948873 |  |
| 208339_at    | XKRY /// XKRY2 | -2,823166348 | -2,503677622 | -0,31948873 |  |
| 216982_x_at  | -              | -2,823166348 | -2,503677622 | -0,31948873 |  |
| 222721_at    | CNIH4          | -2,823166348 | -2,503677622 | -0,31948873 |  |
| 224650_at    | MAL2           | -2,823166348 | -2,503677622 | -0,31948873 |  |
| 236573_at    | MIB1           | -2,823166348 | -2,503677622 | -0,31948873 |  |
| 237738_at    | -              | -2,823166348 | -2,503677622 | -0,31948873 |  |
| 239777_at    | C14orf182      | -2,823166348 | -2,503677622 | -0,31948873 |  |
| 240970_x_at  | -              | -2,823166348 | -2,503677622 | -0,31948873 |  |
| 243725_at    | -              | -2,823166348 | -2,503677622 | -0,31948873 |  |
| 203043_at    | ZBED1          | 1,079110292  | 1,398700978  | -0,31959069 |  |
| 1556971_a_at | -              | 0,384950573  | 0,704715219  | -0,31976465 |  |
| 1560997_at   | -              | -3,63088022  | -3,311072652 | -0,31980757 |  |
| 213823_at    | HOXA11         | 0,760715727  | 1,080561626  | -0,3198459  |  |
| 218236_s_at  | PRKD3          | 2,943717636  | 3,263564154  | -0,31984652 |  |
| 202735_at    | EBP            | 2,983784569  | 3,303845028  | -0,32006046 |  |
| 204689_at    | HHEX           | 4,240398611  | 4,560475791  | -0,32007718 |  |
| 226296_s_at  | MRPS15         | 4,936934546  | 5,257113023  | -0,32017848 |  |
| 209454_s_at  | TEAD3          | 1,168140757  | 1,488344553  | -0,3202038  |  |
| 1568964_x_at | SPN            | 0,351548291  | 0,67181667   | -0,32026838 |  |
| 221518_s_at  | USP47          | 4,010265089  | 4,330558009  | -0,32029292 |  |
| 223173_at    | SPNS1          | 2,485917452  | 2,806245339  | -0,32032789 |  |
| 218400_at    | OAS3           | 2,382221458  | 2,702564916  | -0,32034346 |  |
| 205416_s_at  | ATXN3          | 1,485482016  | 1,805902329  | -0,32042031 |  |
| 1565879_at   | -              | -0,366776884 | -0,046302147 | -0,32047474 |  |
| 244311_at    | -              | -0,366776884 | -0,046302147 | -0,32047474 |  |
| 203463_s_at  | EPN2           | 0,995078803  | 1,315948728  | -0,32086993 |  |
| 222790_s_at  | RSBN1          | 2,546213279  | 2,867091644  | -0,32087837 |  |
| 227654_at    | FAM65C         | 1,868628927  | 2,189694216  | -0,32106529 |  |
| 229691_at    | ZBTB42         | -0,423248115 | -0,102100538 | -0,32114758 |  |
| 240238_at    | -              | -0,423248115 | -0,102100538 | -0,32114758 |  |
| 222193_at    | C2orf43        | 0,822971223  | 1,144305291  | -0,32133407 |  |
| 218828_at    | C17orf61-PLSCR | 1,089278259  | 1,410714371  | -0,32143611 |  |
| 1559867_at   | -              | 0,03125738   | 0,352836757  | -0,32157938 |  |

|              |                 |              |              |             |  |
|--------------|-----------------|--------------|--------------|-------------|--|
| 1566926_at   | LINC00527       | 0,03125738   | 0,352836757  | -0,32157938 |  |
| 233976_at    | -               | 0,03125738   | 0,352836757  | -0,32157938 |  |
| 1561689_at   | -               | -0,888496123 | -0,566887459 | -0,32160866 |  |
| 206716_at    | UMOD            | -0,888496123 | -0,566887459 | -0,32160866 |  |
| 210155_at    | MYOC            | -0,888496123 | -0,566887459 | -0,32160866 |  |
| 217277_at    | -               | -0,888496123 | -0,566887459 | -0,32160866 |  |
| 235548_at    | APCDD1L         | -0,888496123 | -0,566887459 | -0,32160866 |  |
| 239127_at    | LOC100288860    | -0,888496123 | -0,566887459 | -0,32160866 |  |
| 239408_at    | -               | -0,888496123 | -0,566887459 | -0,32160866 |  |
| 240436_at    | MIPEPP3         | -0,888496123 | -0,566887459 | -0,32160866 |  |
| 1566830_at   | LOC440028       | 0,46522187   | 0,786897721  | -0,32167585 |  |
| 205261_at    | PGC             | 0,46522187   | 0,786897721  | -0,32167585 |  |
| 235463_s_at  | CERS6           | 2,035673598  | 2,357351836  | -0,32167824 |  |
| 226880_at    | NUCKS1          | 4,721374627  | 5,043233221  | -0,32185859 |  |
| 1554526_at   | OLFM3           | -2,359436556 | -2,037551727 | -0,32188483 |  |
| 1555148_a_at | C2orf65         | -2,359436556 | -2,037551727 | -0,32188483 |  |
| 1558308_at   | LOC100292680    | -2,359436556 | -2,037551727 | -0,32188483 |  |
| 1561609_at   | -               | -2,359436556 | -2,037551727 | -0,32188483 |  |
| 1562732_at   | TMEM232         | -2,359436556 | -2,037551727 | -0,32188483 |  |
| 1563568_at   | LINC00559       | -2,359436556 | -2,037551727 | -0,32188483 |  |
| 1565723_at   | LOC100128281    | -2,359436556 | -2,037551727 | -0,32188483 |  |
| 204894_s_at  | AOC3            | -2,359436556 | -2,037551727 | -0,32188483 |  |
| 205815_at    | REG3A           | -2,359436556 | -2,037551727 | -0,32188483 |  |
| 206796_at    | WISP1           | -2,359436556 | -2,037551727 | -0,32188483 |  |
| 225548_at    | SHROOM3         | -2,359436556 | -2,037551727 | -0,32188483 |  |
| 230545_at    | LOC100505601    | -2,359436556 | -2,037551727 | -0,32188483 |  |
| 232850_at    | -               | -2,359436556 | -2,037551727 | -0,32188483 |  |
| 236085_at    | CAPSL           | -2,359436556 | -2,037551727 | -0,32188483 |  |
| 237341_at    | -               | -2,359436556 | -2,037551727 | -0,32188483 |  |
| 240893_at    | -               | -2,359436556 | -2,037551727 | -0,32188483 |  |
| 1553019_at   | TMC2            | 0,246434561  | 0,568365095  | -0,32193053 |  |
| 1553252_a_at | BRWD3           | 0,246434561  | 0,568365095  | -0,32193053 |  |
| 242984_at    | MKLN1           | 0,246434561  | 0,568365095  | -0,32193053 |  |
| 1558128_at   | LOC730202       | 0,627515113  | 0,949447784  | -0,32193267 |  |
| 233399_x_at  | TMED10P1 /// ZN | 0,627515113  | 0,949447784  | -0,32193267 |  |
| 1557326_at   | -               | -3,212234735 | -2,89013181  | -0,32210292 |  |
| 1559763_at   | ZC3H12C         | -3,212234735 | -2,89013181  | -0,32210292 |  |
| 1561347_a_at | -               | -3,212234735 | -2,89013181  | -0,32210292 |  |
| 1567281_at   | -               | -3,212234735 | -2,89013181  | -0,32210292 |  |
| 1570009_at   | LOC643711       | -3,212234735 | -2,89013181  | -0,32210292 |  |
| 1570213_at   | -               | -3,212234735 | -2,89013181  | -0,32210292 |  |
| 224063_at    | NLN             | -3,212234735 | -2,89013181  | -0,32210292 |  |
| 243412_at    | -               | -3,212234735 | -2,89013181  | -0,32210292 |  |
| 232675_s_at  | UCKL1           | 1,874520207  | 2,196649505  | -0,3221293  |  |
| 235258_at    | DCP2            | 1,968405881  | 2,290658654  | -0,32225277 |  |
| 228381_at    | ATF7IP2 /// LOC | 4,158264286  | 4,480569206  | -0,32230492 |  |
| 231810_at    | BRI3BP          | 2,688444421  | 3,010820719  | -0,3223763  |  |
| 1557073_s_at | TTBK2           | -0,543051993 | -0,220592223 | -0,32245977 |  |
| 207427_at    | ACR             | -0,543051993 | -0,220592223 | -0,32245977 |  |
| 229052_at    | ANKRD23 /// ANI | -0,543051993 | -0,220592223 | -0,32245977 |  |
| 232807_at    | FAM131A         | -0,543051993 | -0,220592223 | -0,32245977 |  |
| 239075_at    | -               | -0,543051993 | -0,220592223 | -0,32245977 |  |
| 239280_at    | -               | -0,543051993 | -0,220592223 | -0,32245977 |  |
| 240176_at    | -               | -0,543051993 | -0,220592223 | -0,32245977 |  |
| 240918_at    | -               | -0,543051993 | -0,220592223 | -0,32245977 |  |
| 241828_x_at  | LOC339240       | -0,543051993 | -0,220592223 | -0,32245977 |  |

|              |                |              |              |             |  |
|--------------|----------------|--------------|--------------|-------------|--|
| 243450_at    | -              | -0,543051993 | -0,220592223 | -0,32245977 |  |
| 201627_s_at  | INSIG1         | 3,074867907  | 3,39737216   | -0,32250425 |  |
| 207929_at    | GRPR           | 0,209623097  | 0,532164371  | -0,32254127 |  |
| 226260_x_at  | ZNF358         | 0,209623097  | 0,532164371  | -0,32254127 |  |
| 1559066_at   | LOC158402      | -1,937711681 | -1,615132408 | -0,32257927 |  |
| 1561686_at   | -              | -1,937711681 | -1,615132408 | -0,32257927 |  |
| 207445_s_at  | CCR9           | -1,937711681 | -1,615132408 | -0,32257927 |  |
| 207902_at    | IL5RA          | -1,937711681 | -1,615132408 | -0,32257927 |  |
| 210192_at    | ATP8A1         | -1,937711681 | -1,615132408 | -0,32257927 |  |
| 217296_at    | KIR2DL1        | -1,937711681 | -1,615132408 | -0,32257927 |  |
| 231287_s_at  | PRSS54         | -1,937711681 | -1,615132408 | -0,32257927 |  |
| 236787_at    | LOC100507286   | -1,937711681 | -1,615132408 | -0,32257927 |  |
| 243564_at    | PDE1C          | -1,937711681 | -1,615132408 | -0,32257927 |  |
| 243744_at    | FONG           | -1,937711681 | -1,615132408 | -0,32257927 |  |
| 244297_at    | ANKRD18A       | -1,937711681 | -1,615132408 | -0,32257927 |  |
| 244333_at    | -              | -1,937711681 | -1,615132408 | -0,32257927 |  |
| 1555014_x_at | -              | 0,401366113  | 0,724100169  | -0,32273406 |  |
| 1559186_at   | -              | 0,401366113  | 0,724100169  | -0,32273406 |  |
| 201844_s_at  | RYBP           | 4,315944589  | 4,638743768  | -0,32279918 |  |
| 1556514_at   | C12orf74       | -3,013665402 | -2,690860744 | -0,32280466 |  |
| 1556590_s_at | -              | -3,013665402 | -2,690860744 | -0,32280466 |  |
| 1558725_at   | SRRM3          | -3,013665402 | -2,690860744 | -0,32280466 |  |
| 1558964_at   | FAT3           | -3,013665402 | -2,690860744 | -0,32280466 |  |
| 1566862_at   | -              | -3,013665402 | -2,690860744 | -0,32280466 |  |
| 1569218_at   | -              | -3,013665402 | -2,690860744 | -0,32280466 |  |
| 206479_at    | TRPM1          | -3,013665402 | -2,690860744 | -0,32280466 |  |
| 206717_at    | MYH8           | -3,013665402 | -2,690860744 | -0,32280466 |  |
| 227140_at    | INHBA          | -3,013665402 | -2,690860744 | -0,32280466 |  |
| 232088_x_at  | LOC100271722   | -3,013665402 | -2,690860744 | -0,32280466 |  |
| 232744_x_at  | -              | -3,013665402 | -2,690860744 | -0,32280466 |  |
| 236799_at    | -              | -3,013665402 | -2,690860744 | -0,32280466 |  |
| 243232_at    | -              | -3,013665402 | -2,690860744 | -0,32280466 |  |
| 205414_s_at  | ARHGAP44       | 0,57058931   | 0,893473268  | -0,32288396 |  |
| 209364_at    | BAD            | 0,57058931   | 0,893473268  | -0,32288396 |  |
| 238035_at    | SP3            | 1,274448124  | 1,59747851   | -0,32303039 |  |
| 1555344_at   | -              | -2,779459409 | -2,456406426 | -0,32305298 |  |
| 1556815_at   | -              | -2,779459409 | -2,456406426 | -0,32305298 |  |
| 1557745_at   | -              | -2,779459409 | -2,456406426 | -0,32305298 |  |
| 1557826_at   | LOC338817      | -2,779459409 | -2,456406426 | -0,32305298 |  |
| 1560495_at   | -              | -2,779459409 | -2,456406426 | -0,32305298 |  |
| 1560988_a_at | LINC00556      | -2,779459409 | -2,456406426 | -0,32305298 |  |
| 1564164_at   | DENND1B        | -2,779459409 | -2,456406426 | -0,32305298 |  |
| 1569794_at   | -              | -2,779459409 | -2,456406426 | -0,32305298 |  |
| 205615_at    | CPA1           | -2,779459409 | -2,456406426 | -0,32305298 |  |
| 211906_s_at  | SERPINB4       | -2,779459409 | -2,456406426 | -0,32305298 |  |
| 216778_s_at  | CYLC1          | -2,779459409 | -2,456406426 | -0,32305298 |  |
| 217037_at    | -              | -2,779459409 | -2,456406426 | -0,32305298 |  |
| 217059_at    | MUC7           | -2,779459409 | -2,456406426 | -0,32305298 |  |
| 220791_x_at  | SCN11A         | -2,779459409 | -2,456406426 | -0,32305298 |  |
| 220921_at    | SPANXB1 /// SP | -2,779459409 | -2,456406426 | -0,32305298 |  |
| 221441_at    | GSC2           | -2,779459409 | -2,456406426 | -0,32305298 |  |
| 227911_at    | ARHGAP28       | -2,779459409 | -2,456406426 | -0,32305298 |  |
| 232801_at    | ERCC6L2        | -2,779459409 | -2,456406426 | -0,32305298 |  |
| 233872_x_at  | ARHGAP5        | -2,779459409 | -2,456406426 | -0,32305298 |  |
| 236902_at    | FLJ43390       | -2,779459409 | -2,456406426 | -0,32305298 |  |
| 237124_at    | -              | -2,779459409 | -2,456406426 | -0,32305298 |  |

|              |                  |              |              |             |  |
|--------------|------------------|--------------|--------------|-------------|--|
| 242031_at    | -                | -2,779459409 | -2,456406426 | -0,32305298 |  |
| 242536_at    | -                | -2,779459409 | -2,456406426 | -0,32305298 |  |
| 243250_at    | -                | -2,779459409 | -2,456406426 | -0,32305298 |  |
| 243588_at    | -                | -2,779459409 | -2,456406426 | -0,32305298 |  |
| 244308_at    | LOC100507539     | -2,779459409 | -2,456406426 | -0,32305298 |  |
| 244731_at    | -                | -2,779459409 | -2,456406426 | -0,32305298 |  |
| 1553756_at   | GLIS3-AS1        | -0,741668563 | -0,41858459  | -0,32308397 |  |
| 1564683_at   | TBL3             | -0,741668563 | -0,41858459  | -0,32308397 |  |
| 205820_s_at  | APOC3            | -0,741668563 | -0,41858459  | -0,32308397 |  |
| 221323_at    | ULBP1            | -0,741668563 | -0,41858459  | -0,32308397 |  |
| 224141_at    | FLJ38668         | -0,741668563 | -0,41858459  | -0,32308397 |  |
| 240554_at    | AKAP8L           | -0,741668563 | -0,41858459  | -0,32308397 |  |
| 241697_at    | -                | -0,741668563 | -0,41858459  | -0,32308397 |  |
| 242798_at    | -                | -0,741668563 | -0,41858459  | -0,32308397 |  |
| 1568249_at   | LOC388796 /// SI | -1,543331864 | -1,220210588 | -0,32312128 |  |
| 202357_s_at  | CFB              | -1,543331864 | -1,220210588 | -0,32312128 |  |
| 232350_x_at  | GPR161           | -1,543331864 | -1,220210588 | -0,32312128 |  |
| 234516_at    | -                | -1,543331864 | -1,220210588 | -0,32312128 |  |
| 240729_at    | FAM194A          | -1,543331864 | -1,220210588 | -0,32312128 |  |
| 241379_at    | APLF             | -1,543331864 | -1,220210588 | -0,32312128 |  |
| 243095_at    | -                | -1,543331864 | -1,220210588 | -0,32312128 |  |
| 243240_at    | -                | -1,543331864 | -1,220210588 | -0,32312128 |  |
| 204424_s_at  | LMO3             | 2,429008604  | 2,752192409  | -0,32318381 |  |
| 220003_at    | LRRC36           | 0,171847695  | 0,495031851  | -0,32318416 |  |
| 208951_at    | ALDH7A1          | 1,542099044  | 1,865308541  | -0,3232095  |  |
| 205311_at    | DDC              | -0,67289328  | -0,34958478  | -0,3233085  |  |
| 214798_at    | ATP2C2           | -0,67289328  | -0,34958478  | -0,3233085  |  |
| 226388_at    | TCEA3            | -0,67289328  | -0,34958478  | -0,3233085  |  |
| 239111_at    | PRDM8            | -0,67289328  | -0,34958478  | -0,3233085  |  |
| 242411_at    | ARL10            | -0,67289328  | -0,34958478  | -0,3233085  |  |
| 206555_s_at  | THUMPD1          | 1,352503698  | 1,675891488  | -0,32338779 |  |
| 232530_at    | PLD1             | 1,352503698  | 1,675891488  | -0,32338779 |  |
| 1555015_a_at | ZNF398           | 0,767063567  | 1,090553537  | -0,32348997 |  |
| 236836_at    | -                | 0,767063567  | 1,090553537  | -0,32348997 |  |
| 1552877_s_at | LINC00334        | -1,089016378 | -0,765504029 | -0,32351235 |  |
| 1552931_a_at | PDE8A            | -1,089016378 | -0,765504029 | -0,32351235 |  |
| 206127_at    | ELK3             | -1,089016378 | -0,765504029 | -0,32351235 |  |
| 206232_s_at  | B4GALT6          | -1,089016378 | -0,765504029 | -0,32351235 |  |
| 211106_at    | SUPT3H           | -1,089016378 | -0,765504029 | -0,32351235 |  |
| 221080_s_at  | DENND1C          | -1,089016378 | -0,765504029 | -0,32351235 |  |
| 239308_at    | DYRK1A           | -1,089016378 | -0,765504029 | -0,32351235 |  |
| 241231_at    | -                | -1,089016378 | -0,765504029 | -0,32351235 |  |
| 1555841_at   | MSANTD3          | 1,426552034  | 1,750261389  | -0,32370935 |  |
| 203672_x_at  | TPMT             | 2,965960999  | 3,289820089  | -0,32385909 |  |
| 204374_s_at  | GALK1            | 0,133056859  | 0,456918297  | -0,32386144 |  |
| 232972_at    | C17orf72         | 0,334552598  | 0,658444279  | -0,32389168 |  |
| 242733_at    | -                | 0,334552598  | 0,658444279  | -0,32389168 |  |
| 213028_at    | NFRKB            | 2,094906514  | 2,419116683  | -0,32421017 |  |
| 203233_at    | IL4R             | 1,481627361  | 1,805902329  | -0,32427497 |  |
| 204859_s_at  | APAF1            | 1,481627361  | 1,805902329  | -0,32427497 |  |
| 230405_at    | C5orf56          | 0,853119696  | 1,177496821  | -0,32437712 |  |
| 241595_at    | -                | 0,853119696  | 1,177496821  | -0,32437712 |  |
| 1554099_a_at | SPIN3            | 0,715481152  | 1,039887232  | -0,32440608 |  |
| 1568592_at   | TRIM69           | 0,715481152  | 1,039887232  | -0,32440608 |  |
| 210438_x_at  | TROVE2           | 3,75400739   | 4,078419261  | -0,32441187 |  |
| 212608_s_at  | -                | 4,41122478   | 4,735843687  | -0,32461891 |  |



|              |                 |              |              |             |  |
|--------------|-----------------|--------------|--------------|-------------|--|
| 236701_at    | GSG1L           | -0,148196756 | 0,176436073  | -0,32463283 |  |
| 240458_at    | -               | -0,148196756 | 0,176436073  | -0,32463283 |  |
| 1553560_at   | VN1R4           | -2,236765673 | -1,912089812 | -0,32467586 |  |
| 1554808_at   | ACP1            | -2,236765673 | -1,912089812 | -0,32467586 |  |
| 1557104_at   | ZSCAN30         | -2,236765673 | -1,912089812 | -0,32467586 |  |
| 1559882_at   | SAMHD1          | -2,236765673 | -1,912089812 | -0,32467586 |  |
| 223567_at    | SEMA6B          | -2,236765673 | -1,912089812 | -0,32467586 |  |
| 233684_at    | -               | -2,236765673 | -1,912089812 | -0,32467586 |  |
| 235137_at    | PCBP1-AS1       | -2,236765673 | -1,912089812 | -0,32467586 |  |
| 237715_at    | -               | -2,236765673 | -1,912089812 | -0,32467586 |  |
| 238514_at    | TMEM25          | -2,236765673 | -1,912089812 | -0,32467586 |  |
| 239488_at    | PPM1L           | -2,236765673 | -1,912089812 | -0,32467586 |  |
| 240109_at    | -               | -2,236765673 | -1,912089812 | -0,32467586 |  |
| 240807_at    | LOC100507267    | -2,236765673 | -1,912089812 | -0,32467586 |  |
| 241738_at    | ZNF250          | -2,236765673 | -1,912089812 | -0,32467586 |  |
| 243361_at    | SREK1           | -2,236765673 | -1,912089812 | -0,32467586 |  |
| 244388_at    | -               | -2,236765673 | -1,912089812 | -0,32467586 |  |
| 244416_at    | TTC17           | -2,236765673 | -1,912089812 | -0,32467586 |  |
| 225005_at    | PHF13           | 3,636716366  | 3,96146507   | -0,3247487  |  |
| 207624_s_at  | RPGR            | 0,82905153   | 1,153866761  | -0,32481523 |  |
| 208874_x_at  | PPP2R4          | 1,360921491  | 1,685812099  | -0,32489061 |  |
| 225033_at    | ST3GAL1         | 1,995690482  | 2,320681318  | -0,32499084 |  |
| 1557737_s_at | NKTR            | -2,063149277 | -1,738067356 | -0,32508192 |  |
| 1562585_at   | LOC284263       | -2,063149277 | -1,738067356 | -0,32508192 |  |
| 1568604_a_at | CADPS           | -2,063149277 | -1,738067356 | -0,32508192 |  |
| 207386_at    | CYP7B1          | -2,063149277 | -1,738067356 | -0,32508192 |  |
| 214451_at    | TFAP2B          | -2,063149277 | -1,738067356 | -0,32508192 |  |
| 222520_s_at  | IFT57           | -2,063149277 | -1,738067356 | -0,32508192 |  |
| 228507_at    | PDE3A           | -2,063149277 | -1,738067356 | -0,32508192 |  |
| 230920_at    | TRABD2B         | -2,063149277 | -1,738067356 | -0,32508192 |  |
| 235471_at    | VSTM4           | -2,063149277 | -1,738067356 | -0,32508192 |  |
| 236383_at    | -               | -2,063149277 | -1,738067356 | -0,32508192 |  |
| 236587_at    | -               | -2,063149277 | -1,738067356 | -0,32508192 |  |
| 240625_at    | -               | -2,063149277 | -1,738067356 | -0,32508192 |  |
| 242730_at    | MYRIP           | -2,063149277 | -1,738067356 | -0,32508192 |  |
| 219688_at    | BBS7            | 0,67554678   | 1,000684521  | -0,32513774 |  |
| 222955_s_at  | FAM45A /// FAM4 | 0,67554678   | 1,000684521  | -0,32513774 |  |
| 1552879_a_at | ATOH7           | -2,187914861 | -1,862647763 | -0,3252671  |  |
| 1560753_at   | -               | -2,187914861 | -1,862647763 | -0,3252671  |  |
| 1566543_at   | -               | -2,187914861 | -1,862647763 | -0,3252671  |  |
| 1568884_at   | DNAJC2          | -2,187914861 | -1,862647763 | -0,3252671  |  |
| 1569369_at   | ZFYVE28         | -2,187914861 | -1,862647763 | -0,3252671  |  |
| 1569874_s_at | LIPJ            | -2,187914861 | -1,862647763 | -0,3252671  |  |
| 204846_at    | CP              | -2,187914861 | -1,862647763 | -0,3252671  |  |
| 204988_at    | FGB             | -2,187914861 | -1,862647763 | -0,3252671  |  |
| 205935_at    | FOXF1           | -2,187914861 | -1,862647763 | -0,3252671  |  |
| 207097_s_at  | SLC17A2         | -2,187914861 | -1,862647763 | -0,3252671  |  |
| 207337_at    | CTAG2           | -2,187914861 | -1,862647763 | -0,3252671  |  |
| 208600_s_at  | GPR39           | -2,187914861 | -1,862647763 | -0,3252671  |  |
| 210921_at    | -               | -2,187914861 | -1,862647763 | -0,3252671  |  |
| 211674_x_at  | CTAG1A /// CTA  | -2,187914861 | -1,862647763 | -0,3252671  |  |
| 221060_s_at  | TLR4            | -2,187914861 | -1,862647763 | -0,3252671  |  |
| 224123_at    | DKFZP434F142    | -2,187914861 | -1,862647763 | -0,3252671  |  |
| 228414_at    | KCNMA1          | -2,187914861 | -1,862647763 | -0,3252671  |  |
| 231556_at    | TECR            | -2,187914861 | -1,862647763 | -0,3252671  |  |
| 232629_at    | PROK2           | -2,187914861 | -1,862647763 | -0,3252671  |  |

|              |                 |              |              |             |  |
|--------------|-----------------|--------------|--------------|-------------|--|
| 233075_at    | HERC2P7         | -2,187914861 | -1,862647763 | -0,3252671  |  |
| 233862_at    | -               | -2,187914861 | -1,862647763 | -0,3252671  |  |
| 234676_s_at  | N6AMT1          | -2,187914861 | -1,862647763 | -0,3252671  |  |
| 234871_at    | GPR98           | -2,187914861 | -1,862647763 | -0,3252671  |  |
| 235666_at    | ITGA8           | -2,187914861 | -1,862647763 | -0,3252671  |  |
| 236173_s_at  | LRIG1           | -2,187914861 | -1,862647763 | -0,3252671  |  |
| 238395_at    | -               | -2,187914861 | -1,862647763 | -0,3252671  |  |
| 223311_s_at  | MTA3            | 1,247462054  | 1,572742379  | -0,32528033 |  |
| 1556352_at   | -               | 0,052199481  | 0,377530647  | -0,32533117 |  |
| 1563425_at   | -               | 0,052199481  | 0,377530647  | -0,32533117 |  |
| 222265_at    | TNS4            | 0,052199481  | 0,377530647  | -0,32533117 |  |
| 58994_at     | CC2D1A          | 1,958733042  | 2,284143129  | -0,32541009 |  |
| 224578_at    | RCC2            | 5,045199552  | 5,37063173   | -0,32543218 |  |
| 203596_s_at  | IFIT5           | 2,410880861  | 2,7363693    | -0,32548844 |  |
| 1560071_a_at | -               | -0,196756757 | 0,128747141  | -0,3255039  |  |
| 210651_s_at  | EPHB2           | -0,196756757 | 0,128747141  | -0,3255039  |  |
| 214504_at    | ABO             | -0,196756757 | 0,128747141  | -0,3255039  |  |
| 222366_at    | -               | -0,196756757 | 0,128747141  | -0,3255039  |  |
| 203013_at    | ECD             | 3,319065909  | 3,644594022  | -0,32552811 |  |
| 227493_s_at  | KIAA1143        | 2,68509622   | 3,010820719  | -0,3257245  |  |
| 1569607_s_at | ANKRD20A1 /// A | 0,779676066  | 1,105412836  | -0,32573677 |  |
| 210952_at    | AP4S1           | 0,228146222  | 0,553993624  | -0,3258474  |  |
| 214213_x_at  | LMNA            | 0,228146222  | 0,553993624  | -0,3258474  |  |
| 228012_at    | MATR3 /// SNHG  | 0,228146222  | 0,553993624  | -0,3258474  |  |
| 222988_s_at  | TMEM9           | 2,986507217  | 3,312408479  | -0,32590126 |  |
| 212949_at    | NCAPH           | 3,189186085  | 3,515187047  | -0,32600096 |  |
| 226465_s_at  | SON             | 4,713590151  | 5,039691895  | -0,32610174 |  |
| 218246_at    | MUL1            | 1,706348269  | 2,032717854  | -0,32636958 |  |
| 215599_at    | GUSBP3 /// GUS  | 0,606430281  | 0,932882274  | -0,32645199 |  |
| 38340_at     | HIP1R           | 0,668782245  | 0,995376073  | -0,32659383 |  |
| 1568699_at   | IFT43           | 0,728550685  | 1,055274826  | -0,32672414 |  |
| 212786_at    | CLEC16A         | 0,728550685  | 1,055274826  | -0,32672414 |  |
| 221953_s_at  | -               | 0,728550685  | 1,055274826  | -0,32672414 |  |
| 235435_at    | AASDH           | 0,728550685  | 1,055274826  | -0,32672414 |  |
| 223139_s_at  | DHX36           | 3,831009889  | 4,157782885  | -0,326773   |  |
| 244397_at    | -               | -0,033456564 | 0,293518836  | -0,3269754  |  |
| 210597_x_at  | PRB1            | 0,57782909   | 0,904843258  | -0,32701417 |  |
| 211994_at    | WNK1            | 3,072307152  | 3,399383202  | -0,32707605 |  |
| 1558765_a_at | -               | -1,591296941 | -1,264005341 | -0,3272916  |  |
| 1561401_at   | LOC285627       | -1,591296941 | -1,264005341 | -0,3272916  |  |
| 1561440_at   | LOC100507479    | -1,591296941 | -1,264005341 | -0,3272916  |  |
| 1566727_at   | -               | -1,591296941 | -1,264005341 | -0,3272916  |  |
| 203232_s_at  | ATXN1           | -1,591296941 | -1,264005341 | -0,3272916  |  |
| 206191_at    | ENTPD3          | -1,591296941 | -1,264005341 | -0,3272916  |  |
| 206979_at    | C8B             | -1,591296941 | -1,264005341 | -0,3272916  |  |
| 214560_at    | FPR3            | -1,591296941 | -1,264005341 | -0,3272916  |  |
| 216578_at    | -               | -1,591296941 | -1,264005341 | -0,3272916  |  |
| 216840_s_at  | LAMA2           | -1,591296941 | -1,264005341 | -0,3272916  |  |
| 221404_at    | IL36A           | -1,591296941 | -1,264005341 | -0,3272916  |  |
| 230217_at    | CLVS1           | -1,591296941 | -1,264005341 | -0,3272916  |  |
| 233617_at    | TSPY26P         | -1,591296941 | -1,264005341 | -0,3272916  |  |
| 234857_at    | -               | -1,591296941 | -1,264005341 | -0,3272916  |  |
| 235721_at    | DTX3            | -1,591296941 | -1,264005341 | -0,3272916  |  |
| 235900_at    | SPNS3           | -1,591296941 | -1,264005341 | -0,3272916  |  |
| 239318_at    | FAM118B         | -1,591296941 | -1,264005341 | -0,3272916  |  |
| 240242_at    | -               | -1,591296941 | -1,264005341 | -0,3272916  |  |

|              |                 |              |              |             |  |
|--------------|-----------------|--------------|--------------|-------------|--|
| 241804_at    | -               | -1,591296941 | -1,264005341 | -0,3272916  |  |
| 244059_at    | -               | -1,591296941 | -1,264005341 | -0,3272916  |  |
| 1553727_at   | B4GALNT3        | 0,152582607  | 0,479907041  | -0,32732443 |  |
| 216791_at    | -               | 0,152582607  | 0,479907041  | -0,32732443 |  |
| 226625_at    | TGFBR3          | 0,152582607  | 0,479907041  | -0,32732443 |  |
| 234070_at    | -               | 0,152582607  | 0,479907041  | -0,32732443 |  |
| 238822_at    | -               | 0,152582607  | 0,479907041  | -0,32732443 |  |
| 225461_at    | EHMT1           | 2,061726373  | 2,389070873  | -0,3273445  |  |
| 223075_s_at  | AIF1L           | -0,299034815 | 0,028364014  | -0,32739883 |  |
| 234321_x_at  | NHSL1           | -0,299034815 | 0,028364014  | -0,32739883 |  |
| 230645_at    | FRMD3           | 1,269985355  | 1,59747851   | -0,32749316 |  |
| 1555932_at   | TSGA10          | -3,32387526  | -2,996335703 | -0,32753956 |  |
| 1556170_at   | -               | -3,32387526  | -2,996335703 | -0,32753956 |  |
| 1570183_at   | FBXO34          | -3,32387526  | -2,996335703 | -0,32753956 |  |
| 220503_at    | SLC13A1         | -3,32387526  | -2,996335703 | -0,32753956 |  |
| 1553386_at   | MFSD2A          | -1,240169874 | -0,912331589 | -0,32783829 |  |
| 1554520_at   | LOC283861       | -1,240169874 | -0,912331589 | -0,32783829 |  |
| 1570064_at   | -               | -1,240169874 | -0,912331589 | -0,32783829 |  |
| 202434_s_at  | CYP1B1          | -1,240169874 | -0,912331589 | -0,32783829 |  |
| 215594_at    | ERV9-1          | -1,240169874 | -0,912331589 | -0,32783829 |  |
| 216596_at    | DKFZP434L187    | -1,240169874 | -0,912331589 | -0,32783829 |  |
| 216812_at    | -               | -1,240169874 | -0,912331589 | -0,32783829 |  |
| 217455_s_at  | SSTR2           | -1,240169874 | -0,912331589 | -0,32783829 |  |
| 221814_at    | GPR124          | -1,240169874 | -0,912331589 | -0,32783829 |  |
| 228463_at    | FOXA3           | -1,240169874 | -0,912331589 | -0,32783829 |  |
| 228678_at    | FAM116B         | -1,240169874 | -0,912331589 | -0,32783829 |  |
| 230874_at    | SLC36A4         | -1,240169874 | -0,912331589 | -0,32783829 |  |
| 231328_s_at  | RASGRP4         | -1,240169874 | -0,912331589 | -0,32783829 |  |
| 232906_at    | -               | -1,240169874 | -0,912331589 | -0,32783829 |  |
| 234412_at    | -               | -1,240169874 | -0,912331589 | -0,32783829 |  |
| 235361_at    | STAMBP          | -1,240169874 | -0,912331589 | -0,32783829 |  |
| 235768_at    | SH3RF2          | -1,240169874 | -0,912331589 | -0,32783829 |  |
| 241009_at    | FOXN4           | -1,240169874 | -0,912331589 | -0,32783829 |  |
| 242807_at    | FSD1L           | -1,240169874 | -0,912331589 | -0,32783829 |  |
| 243309_at    | FLJ27352        | -1,240169874 | -0,912331589 | -0,32783829 |  |
| 229871_at    | SAMD4B          | 1,814495998  | 2,14244844   | -0,32795244 |  |
| 241906_at    | -               | 0,376672223  | 0,704715219  | -0,328043   |  |
| 203285_s_at  | HS2ST1 /// LOC3 | 2,094906514  | 2,423075926  | -0,32816941 |  |
| 238337_s_at  | DNAJC21         | 3,098971025  | 3,427247355  | -0,32827633 |  |
| 201875_s_at  | MPZL1           | 0,648296226  | 0,976641161  | -0,32834494 |  |
| 1563131_at   | -               | -0,352951799 | -0,024572586 | -0,32837921 |  |
| 214125_s_at  | NENF            | -0,352951799 | -0,024572586 | -0,32837921 |  |
| 215748_at    | KLHL35          | -0,352951799 | -0,024572586 | -0,32837921 |  |
| 227918_s_at  | ZYG11B          | -0,352951799 | -0,024572586 | -0,32837921 |  |
| 220525_s_at  | AUP1            | 4,073092675  | 4,401504959  | -0,32841228 |  |
| 1557208_at   | LOC219731       | 1,446464021  | 1,775255987  | -0,32879197 |  |
| 222767_s_at  | C12orf49        | 1,683039483  | 2,011838132  | -0,32879865 |  |
| 203529_at    | PPP6C           | 4,341690695  | 4,67073226   | -0,32904157 |  |
| 227723_at    | LOH12CR1        | 1,177702228  | 1,507116528  | -0,3294143  |  |
| 216115_at    | NF1             | 0,30867765   | 0,638150376  | -0,32947273 |  |
| 239811_at    | -               | 0,30867765   | 0,638150376  | -0,32947273 |  |
| 226907_at    | PPP1R14C        | 1,973904239  | 2,303602088  | -0,32969785 |  |
| 1553328_a_at | SLC18A2         | -0,172274514 | 0,157549243  | -0,32982376 |  |
| 1563455_at   | SIK3            | -0,172274514 | 0,157549243  | -0,32982376 |  |
| 1563902_at   | -               | -0,172274514 | 0,157549243  | -0,32982376 |  |
| 207169_x_at  | DDR1 /// MIR464 | -0,172274514 | 0,157549243  | -0,32982376 |  |

|              |         |              |              |             |  |
|--------------|---------|--------------|--------------|-------------|--|
| 212256_at    | GALNT10 | -0,172274514 | 0,157549243  | -0,32982376 |  |
| 221187_s_at  | FUZ     | 0,87091093   | 1,200746069  | -0,32983514 |  |
| 202080_s_at  | TRAK1   | 1,805273023  | 2,135226207  | -0,32995318 |  |
| 1552277_a_at | MSANTD3 | 1,496984567  | 1,826973888  | -0,32998932 |  |
| 33814_at     | PAK4    | 1,799091453  | 2,129179938  | -0,33008848 |  |
| 241718_x_at  | -       | 0,425644434  | 0,755840599  | -0,33019617 |  |
| 204049_s_at  | PHACTR2 | 3,828735867  | 4,158970399  | -0,33023453 |  |
| 207598_x_at  | XRCC2   | 0,273439642  | 0,603679647  | -0,33024    |  |
| 212775_at    | OBSL1   | 1,67631007   | 2,006570641  | -0,33026057 |  |
| 211092_s_at  | NF2     | 0,103263601  | 0,433557298  | -0,3302937  |  |
| 224296_x_at  | -       | -3,566473328 | -3,236070201 | -0,33040313 |  |
| 201446_s_at  | TIA1    | 2,883642771  | 3,21415095   | -0,33050818 |  |
| 204417_at    | GALC    | 4,859592153  | 5,190154255  | -0,3305621  |  |
| 203546_at    | IPO13   | 1,534677255  | 1,865308541  | -0,33063129 |  |
| 210609_s_at  | TP53I3  | 1,46610492   | 1,796776588  | -0,33067167 |  |
| 242403_at    | -       | 1,46610492   | 1,796776588  | -0,33067167 |  |
| 213400_s_at  | TBL1X   | 2,959046717  | 3,289820089  | -0,33077337 |  |
| 235678_at    | GM2A    | 0,533835206  | 0,864649967  | -0,33081476 |  |
| 65635_at     | ENGASE  | 1,238353345  | 1,569173768  | -0,33082042 |  |
| 204934_s_at  | HPN     | -0,221656139 | 0,109221392  | -0,33087753 |  |
| 212980_at    | USP34   | -0,221656139 | 0,109221392  | -0,33087753 |  |
| 229408_at    | HDAC5   | -0,221656139 | 0,109221392  | -0,33087753 |  |
| 238518_x_at  | GLYCTK  | -0,221656139 | 0,109221392  | -0,33087753 |  |
| 232168_x_at  | MACF1   | 0,822971223  | 1,153866761  | -0,33089554 |  |
| 217776_at    | RDH11   | 4,828062928  | 5,159334254  | -0,33127133 |  |
| 49049_at     | DTX3    | -0,621418049 | -0,290085823 | -0,33133223 |  |
| 230623_x_at  | USP28   | 1,894952274  | 2,226407528  | -0,33145525 |  |
| 231553_s_at  | MICAL3  | 0,503742507  | 0,835239052  | -0,33149655 |  |
| 208255_s_at  | FKBP8   | 0,682279745  | 1,013870809  | -0,33159106 |  |
| 213221_s_at  | SIK2    | 0,682279745  | 1,013870809  | -0,33159106 |  |
| 1553131_a_at | GATA4   | 0,359971644  | 0,691645685  | -0,33167404 |  |
| 215865_at    | SYT12   | 0,359971644  | 0,691645685  | -0,33167404 |  |
| 216885_s_at  | DCAF8   | 0,359971644  | 0,691645685  | -0,33167404 |  |
| 238736_at    | REV3L   | 0,359971644  | 0,691645685  | -0,33167404 |  |
| 240683_at    | -       | 0,359971644  | 0,691645685  | -0,33167404 |  |
| 242016_at    | -       | 0,359971644  | 0,691645685  | -0,33167404 |  |
| 232488_at    | AGXT2L2 | 0,882651021  | 1,214517879  | -0,33186686 |  |
| 231928_at    | HES2    | 0,20027154   | 0,532164371  | -0,33189283 |  |
| 1557787_at   | -       | -2,667025278 | -2,335104118 | -0,33192116 |  |
| 1560638_a_at | -       | -2,667025278 | -2,335104118 | -0,33192116 |  |
| 1561053_at   | -       | -2,667025278 | -2,335104118 | -0,33192116 |  |
| 1562671_s_at | -       | -2,667025278 | -2,335104118 | -0,33192116 |  |
| 1563169_at   | -       | -2,667025278 | -2,335104118 | -0,33192116 |  |
| 1563331_at   | -       | -2,667025278 | -2,335104118 | -0,33192116 |  |
| 1570024_at   | -       | -2,667025278 | -2,335104118 | -0,33192116 |  |
| 207371_at    | -       | -2,667025278 | -2,335104118 | -0,33192116 |  |
| 210198_s_at  | PLP1    | -2,667025278 | -2,335104118 | -0,33192116 |  |
| 221202_at    | -       | -2,667025278 | -2,335104118 | -0,33192116 |  |
| 224257_s_at  | PBOV1   | -2,667025278 | -2,335104118 | -0,33192116 |  |
| 226435_at    | PAPLN   | -2,667025278 | -2,335104118 | -0,33192116 |  |
| 227939_s_at  | TRA2A   | -2,667025278 | -2,335104118 | -0,33192116 |  |
| 229706_at    | TCERG1  | -2,667025278 | -2,335104118 | -0,33192116 |  |
| 231335_at    | MS4A6E  | -2,667025278 | -2,335104118 | -0,33192116 |  |
| 236843_at    | NOX4    | -2,667025278 | -2,335104118 | -0,33192116 |  |
| 242820_at    | -       | -2,667025278 | -2,335104118 | -0,33192116 |  |
| 243783_at    | -       | -2,667025278 | -2,335104118 | -0,33192116 |  |

|              |                  |              |              |             |  |
|--------------|------------------|--------------|--------------|-------------|--|
| 243873_at    | -                | -2,667025278 | -2,335104118 | -0,33192116 |  |
| 244181_at    | -                | -2,667025278 | -2,335104118 | -0,33192116 |  |
| 219640_at    | CLDN15           | 2,630440446  | 2,962671751  | -0,3322313  |  |
| 1553764_a_at | AJUBA            | 0,859074518  | 1,191491281  | -0,33241676 |  |
| 232536_at    | LRRC3DN          | 0,859074518  | 1,191491281  | -0,33241676 |  |
| 1553639_a_at | PPARGC1B         | -0,59053611  | -0,258114234 | -0,33242188 |  |
| 223122_s_at  | SFRP2            | -0,59053611  | -0,258114234 | -0,33242188 |  |
| 205155_s_at  | SPTBN2           | -0,946847173 | -0,614371577 | -0,3324756  |  |
| 213965_s_at  | CHD5             | -0,946847173 | -0,614371577 | -0,3324756  |  |
| 222878_s_at  | OTUB2            | -0,946847173 | -0,614371577 | -0,3324756  |  |
| 225372_at    | C10orf54         | -0,946847173 | -0,614371577 | -0,3324756  |  |
| 231461_at    | KRT71            | -0,946847173 | -0,614371577 | -0,3324756  |  |
| 237210_at    | NFRKB            | -0,946847173 | -0,614371577 | -0,3324756  |  |
| 237647_at    | GHRL             | -0,946847173 | -0,614371577 | -0,3324756  |  |
| 239920_at    | UBTF             | -0,946847173 | -0,614371577 | -0,3324756  |  |
| 241213_x_at  | -                | -0,946847173 | -0,614371577 | -0,3324756  |  |
| 242859_at    | -                | -0,946847173 | -0,614371577 | -0,3324756  |  |
| 244179_x_at  | GGT1 /// GGT2 // | -0,946847173 | -0,614371577 | -0,3324756  |  |
| 1561290_at   | LOC339622        | -3,287237186 | -2,954576755 | -0,33266043 |  |
| 1561343_a_at | LOC150005        | -3,287237186 | -2,954576755 | -0,33266043 |  |
| 1564705_at   | GLS2             | -3,287237186 | -2,954576755 | -0,33266043 |  |
| 1569482_at   | -                | -3,287237186 | -2,954576755 | -0,33266043 |  |
| 208192_at    | -                | -3,287237186 | -2,954576755 | -0,33266043 |  |
| 238718_at    | -                | -3,287237186 | -2,954576755 | -0,33266043 |  |
| 236841_at    | LOC100134445     | 1,369290453  | 1,702196344  | -0,33290589 |  |
| 201846_s_at  | RYBP             | 3,472604685  | 3,805658807  | -0,33305412 |  |
| 1552271_at   | PRR22            | -0,655928373 | -0,322870281 | -0,33305809 |  |
| 1557505_a_at | -                | -0,655928373 | -0,322870281 | -0,33305809 |  |
| 1561909_at   | -                | -0,655928373 | -0,322870281 | -0,33305809 |  |
| 236233_at    | TRIM32           | -0,655928373 | -0,322870281 | -0,33305809 |  |
| 227459_at    | -                | 1,638726528  | 1,971855016  | -0,33312849 |  |
| 1559116_s_at | -                | -0,325749314 | 0,007421914  | -0,33317123 |  |
| 226827_at    | TMEM165          | -0,325749314 | 0,007421914  | -0,33317123 |  |
| 229939_at    | ENDOV /// LOC1   | -0,325749314 | 0,007421914  | -0,33317123 |  |
| 239789_at    | C11orf49         | -0,325749314 | 0,007421914  | -0,33317123 |  |
| 205011_at    | VWA5A            | -0,022466681 | 0,310717132  | -0,33318381 |  |
| 235817_at    | TMEM184A         | 0,291166226  | 0,624460759  | -0,33329453 |  |
| 1555224_at   | CCDC148-AS1      | -2,908843709 | -2,575129729 | -0,33371398 |  |
| 1557348_at   | -                | -2,908843709 | -2,575129729 | -0,33371398 |  |
| 1561540_at   | LINC00343        | -2,908843709 | -2,575129729 | -0,33371398 |  |
| 1566362_at   | DNTT             | -2,908843709 | -2,575129729 | -0,33371398 |  |
| 1566798_at   | -                | -2,908843709 | -2,575129729 | -0,33371398 |  |
| 1569543_at   | RSU1             | -2,908843709 | -2,575129729 | -0,33371398 |  |
| 207849_at    | IL2              | -2,908843709 | -2,575129729 | -0,33371398 |  |
| 219093_at    | PID1             | -2,908843709 | -2,575129729 | -0,33371398 |  |
| 231496_at    | FCAMR            | -2,908843709 | -2,575129729 | -0,33371398 |  |
| 234872_at    | -                | -2,908843709 | -2,575129729 | -0,33371398 |  |
| 237071_at    | -                | -2,908843709 | -2,575129729 | -0,33371398 |  |
| 237806_s_at  | LOC284757 /// LC | -2,908843709 | -2,575129729 | -0,33371398 |  |
| 239090_at    | FAM161A          | -2,908843709 | -2,575129729 | -0,33371398 |  |
| 239200_at    | -                | -2,908843709 | -2,575129729 | -0,33371398 |  |
| 240086_at    | VPS36            | -2,908843709 | -2,575129729 | -0,33371398 |  |
| 242897_at    | -                | -2,908843709 | -2,575129729 | -0,33371398 |  |
| 243544_at    | ADH1B            | -2,908843709 | -2,575129729 | -0,33371398 |  |
| 244635_s_at  | -                | -2,908843709 | -2,575129729 | -0,33371398 |  |
| 226791_at    | KIFC2            | 0,123193849  | 0,456918297  | -0,33372445 |  |

|              |                |              |              |             |  |
|--------------|----------------|--------------|--------------|-------------|--|
| 1553909_x_at | FAM178A        | -0,79540287  | -0,461594427 | -0,33380844 |  |
| 218990_s_at  | SPRR3          | -0,79540287  | -0,461594427 | -0,33380844 |  |
| 222882_s_at  | C17orf59       | -0,79540287  | -0,461594427 | -0,33380844 |  |
| 231584_s_at  | BCAS4          | -0,79540287  | -0,461594427 | -0,33380844 |  |
| 238131_at    | PHC2           | -0,79540287  | -0,461594427 | -0,33380844 |  |
| 1554305_at   | MGC20647       | -1,2845686   | -0,950686014 | -0,33388259 |  |
| 1559194_a_at | CLEC4GP1       | -1,2845686   | -0,950686014 | -0,33388259 |  |
| 1567341_at   | FOXD4          | -1,2845686   | -0,950686014 | -0,33388259 |  |
| 205216_s_at  | APOH           | -1,2845686   | -0,950686014 | -0,33388259 |  |
| 206207_at    | CLC            | -1,2845686   | -0,950686014 | -0,33388259 |  |
| 207328_at    | ALOX15         | -1,2845686   | -0,950686014 | -0,33388259 |  |
| 212732_at    | MEG3           | -1,2845686   | -0,950686014 | -0,33388259 |  |
| 216604_s_at  | SLC7A8         | -1,2845686   | -0,950686014 | -0,33388259 |  |
| 220287_at    | ADAMTS9        | -1,2845686   | -0,950686014 | -0,33388259 |  |
| 230846_at    | AKAP5          | -1,2845686   | -0,950686014 | -0,33388259 |  |
| 235557_at    | GPAT2          | -1,2845686   | -0,950686014 | -0,33388259 |  |
| 237091_at    | -              | -1,2845686   | -0,950686014 | -0,33388259 |  |
| 239782_at    | RBP1           | -1,2845686   | -0,950686014 | -0,33388259 |  |
| 243350_at    | -              | -1,2845686   | -0,950686014 | -0,33388259 |  |
| 243646_at    | -              | -1,2845686   | -0,950686014 | -0,33388259 |  |
| 202209_at    | LSM3           | 5,221231783  | 5,55512476   | -0,33389298 |  |
| 216037_x_at  | TCF7L2         | 2,173470163  | 2,507538456  | -0,33406829 |  |
| 207571_x_at  | C1orf38        | 1,596577845  | 1,930732138  | -0,33415429 |  |
| 1559439_s_at | C21orf58       | 0,255492549  | 0,589657387  | -0,33416484 |  |
| 1564876_s_at | FOXP2          | 0,255492549  | 0,589657387  | -0,33416484 |  |
| 229786_at    | -              | 0,255492549  | 0,589657387  | -0,33416484 |  |
| 238543_x_at  | MDGA1          | 0,255492549  | 0,589657387  | -0,33416484 |  |
| 240839_at    | -              | 0,255492549  | 0,589657387  | -0,33416484 |  |
| 219040_at    | CORO7          | 0,57058931   | 0,904843258  | -0,33425395 |  |
| 243963_at    | -              | 0,57058931   | 0,904843258  | -0,33425395 |  |
| 225394_s_at  | ZCRB1          | 2,952099138  | 3,28656411   | -0,33446497 |  |
| 1552389_at   | C8orf47        | -3,114791413 | -2,780313924 | -0,33447749 |  |
| 1552393_at   | ENTHD1         | -3,114791413 | -2,780313924 | -0,33447749 |  |
| 1559213_at   | -              | -3,114791413 | -2,780313924 | -0,33447749 |  |
| 1562898_at   | -              | -3,114791413 | -2,780313924 | -0,33447749 |  |
| 1568926_x_at | MYLK3          | -3,114791413 | -2,780313924 | -0,33447749 |  |
| 1569306_at   | -              | -3,114791413 | -2,780313924 | -0,33447749 |  |
| 214914_at    | FAM13C         | -3,114791413 | -2,780313924 | -0,33447749 |  |
| 216373_at    | TAPT1          | -3,114791413 | -2,780313924 | -0,33447749 |  |
| 220084_at    | C14orf105      | -3,114791413 | -2,780313924 | -0,33447749 |  |
| 224114_at    | -              | -3,114791413 | -2,780313924 | -0,33447749 |  |
| 231202_at    | ALDH1L2        | -3,114791413 | -2,780313924 | -0,33447749 |  |
| 243327_at    | -              | -3,114791413 | -2,780313924 | -0,33447749 |  |
| 221229_s_at  | TRMT61B        | 2,41290634   | 2,747463672  | -0,33455733 |  |
| 212023_s_at  | MKI67          | 1,462198073  | 1,796776588  | -0,33457851 |  |
| 204314_s_at  | CREB1          | 2,074578432  | 2,409170778  | -0,33459235 |  |
| 232078_at    | PVRL2          | 0,541261317  | 0,876248481  | -0,33498716 |  |
| 239742_at    | TULP4          | 1,201332287  | 1,536652708  | -0,33532042 |  |
| 223773_s_at  | SNHG12 /// SNO | 3,735513868  | 4,070868415  | -0,33535455 |  |
| 1565027_at   | OFCC1          | -0,112808516 | 0,222599095  | -0,33540761 |  |
| 228627_at    | TLK2           | -0,112808516 | 0,222599095  | -0,33540761 |  |
| 232587_at    | EML4           | -0,112808516 | 0,222599095  | -0,33540761 |  |
| 216234_s_at  | PRKACA         | 0,401366113  | 0,73688026   | -0,33551415 |  |
| 217944_at    | POMGNT1        | 0,401366113  | 0,73688026   | -0,33551415 |  |
| 236794_at    | -              | 0,401366113  | 0,73688026   | -0,33551415 |  |
| 204921_at    | GAS8           | 1,296557217  | 1,632095957  | -0,33553874 |  |

|              |                  |              |              |             |  |
|--------------|------------------|--------------|--------------|-------------|--|
| 1556116_s_at | TNPO1            | -0,43775896  | -0,102100538 | -0,33565842 |  |
| 1559701_s_at | NDST2            | -0,43775896  | -0,102100538 | -0,33565842 |  |
| 211259_s_at  | BMP7             | -0,43775896  | -0,102100538 | -0,33565842 |  |
| 223788_at    | GTPBP2           | -0,43775896  | -0,102100538 | -0,33565842 |  |
| 231759_at    | TAL2             | -0,43775896  | -0,102100538 | -0,33565842 |  |
| 234299_s_at  | NIN              | -0,43775896  | -0,102100538 | -0,33565842 |  |
| 238743_at    | -                | -0,43775896  | -0,102100538 | -0,33565842 |  |
| 241409_at    | -                | -0,43775896  | -0,102100538 | -0,33565842 |  |
| 202065_s_at  | PPFIA1           | 0,613492853  | 0,949447784  | -0,33595493 |  |
| 204307_at    | TECPR2           | 0,613492853  | 0,949447784  | -0,33595493 |  |
| 1555650_at   | KLHL17           | 0,181384709  | 0,51742585   | -0,33604114 |  |
| 221792_at    | RAB6B            | 0,181384709  | 0,51742585   | -0,33604114 |  |
| 227732_at    | ATXN7L1          | 0,181384709  | 0,51742585   | -0,33604114 |  |
| 219019_at    | PIDD             | 1,094335495  | 1,43051703   | -0,33618154 |  |
| 177_at       | PLD1             | 0,548649398  | 0,884886581  | -0,33623718 |  |
| 215084_s_at  | LRRC42           | 2,724770722  | 3,061230246  | -0,33645952 |  |
| 225184_at    | ARID1B           | 1,261018186  | 1,59747851   | -0,33646032 |  |
| 203088_at    | FBLN5            | 0,480753764  | 0,817300337  | -0,33654657 |  |
| 202586_at    | POLR2L           | 1,000476627  | 1,337086025  | -0,3366094  |  |
| 214552_s_at  | RABEP1           | 1,073999308  | 1,410714371  | -0,33671506 |  |
| 212852_s_at  | TROVE2           | 4,440809032  | 4,777609591  | -0,33680056 |  |
| 1555085_at   | -                | -1,71423189  | -1,377419394 | -0,3368125  |  |
| 1559039_at   | DHX36            | -1,71423189  | -1,377419394 | -0,3368125  |  |
| 1562961_at   | -                | -1,71423189  | -1,377419394 | -0,3368125  |  |
| 1566082_at   | -                | -1,71423189  | -1,377419394 | -0,3368125  |  |
| 1568846_at   | -                | -1,71423189  | -1,377419394 | -0,3368125  |  |
| 206333_at    | MSI1             | -1,71423189  | -1,377419394 | -0,3368125  |  |
| 206465_at    | ACSBG1           | -1,71423189  | -1,377419394 | -0,3368125  |  |
| 209750_at    | NR1D2            | -1,71423189  | -1,377419394 | -0,3368125  |  |
| 214832_at    | HNF4A            | -1,71423189  | -1,377419394 | -0,3368125  |  |
| 215305_at    | PDGFRA           | -1,71423189  | -1,377419394 | -0,3368125  |  |
| 216303_s_at  | MTMR1            | -1,71423189  | -1,377419394 | -0,3368125  |  |
| 220920_at    | ATP10B           | -1,71423189  | -1,377419394 | -0,3368125  |  |
| 231281_at    | -                | -1,71423189  | -1,377419394 | -0,3368125  |  |
| 234743_at    | LIMD1            | -1,71423189  | -1,377419394 | -0,3368125  |  |
| 236757_at    | -                | -1,71423189  | -1,377419394 | -0,3368125  |  |
| 236853_at    | TEX29            | -1,71423189  | -1,377419394 | -0,3368125  |  |
| 241239_at    | EPN2-IT1         | -1,71423189  | -1,377419394 | -0,3368125  |  |
| 241252_at    | ESCO2            | -1,71423189  | -1,377419394 | -0,3368125  |  |
| 242904_x_at  | LOC100653229     | -1,71423189  | -1,377419394 | -0,3368125  |  |
| 243452_at    | LOC646778        | -1,71423189  | -1,377419394 | -0,3368125  |  |
| 1554867_a_at | PRR16            | -0,496991414 | -0,160136748 | -0,33685467 |  |
| 1555752_at   | STH              | -0,496991414 | -0,160136748 | -0,33685467 |  |
| 201852_x_at  | COL3A1           | -0,496991414 | -0,160136748 | -0,33685467 |  |
| 220911_s_at  | NYNRIN           | -0,496991414 | -0,160136748 | -0,33685467 |  |
| 233193_x_at  | INTS4            | -0,496991414 | -0,160136748 | -0,33685467 |  |
| 239001_at    | MGST1            | -0,496991414 | -0,160136748 | -0,33685467 |  |
| 219233_s_at  | GSDMB            | -0,00073712  | 0,336136178  | -0,3368733  |  |
| 232028_at    | ZNF678           | -0,00073712  | 0,336136178  | -0,3368733  |  |
| 233010_at    | -                | -0,00073712  | 0,336136178  | -0,3368733  |  |
| 218123_at    | C21orf59         | 4,39338376   | 4,730262306  | -0,33687855 |  |
| 1562063_x_at | -                | 1,716223609  | 2,053299695  | -0,33707609 |  |
| 218337_at    | FAM160B2         | 1,987559146  | 2,324919719  | -0,33736057 |  |
| 207134_x_at  | TPSB2            | 0,702292136  | 1,039887232  | -0,3375951  |  |
| 209826_at    | EGFL8 /// PPT2 / | 0,792179257  | 1,129843209  | -0,33766395 |  |
| 210974_s_at  | AP3D1            | 2,014487247  | 2,352169913  | -0,33768267 |  |

|              |                |              |              |             |  |
|--------------|----------------|--------------|--------------|-------------|--|
| 231736_x_at  | MGST1          | 3,572931593  | 3,910906416  | -0,33797482 |  |
| 212842_x_at  | RGPD3 /// RGPD | 2,931053371  | 3,269073685  | -0,33802031 |  |
| 229507_at    | FAM212A        | 1,390002893  | 1,728030156  | -0,33802726 |  |
| 205123_s_at  | MSANTD3-TMEF   | 0,417596971  | 0,755840599  | -0,33824363 |  |
| 230661_at    | -              | 0,417596971  | 0,755840599  | -0,33824363 |  |
| 206352_s_at  | PEX10          | 0,67554678   | 1,013870809  | -0,33832403 |  |
| 209495_at    | CEP250         | 0,67554678   | 1,013870809  | -0,33832403 |  |
| 214020_x_at  | ITGB5          | 0,767063567  | 1,105412836  | -0,33834927 |  |
| 210046_s_at  | IDH2           | 2,35929703   | 2,697670403  | -0,33837337 |  |
| 221982_x_at  | LAGE3          | 0,934330293  | 1,272721751  | -0,33839146 |  |
| 228519_x_at  | CIRBP          | 1,011212064  | 1,349621332  | -0,33840927 |  |
| 234312_s_at  | ACSS2          | 1,512180019  | 1,85068474   | -0,33850472 |  |
| 212761_at    | TCF7L2         | 4,365417393  | 4,704062087  | -0,33864469 |  |
| 210785_s_at  | C1orf38        | 1,496984567  | 1,835911187  | -0,33892662 |  |
| 225770_at    | RSPRY1         | 2,272723257  | 2,611817827  | -0,33909457 |  |
| 1553776_at   | UBE2U          | -3,07502285  | -2,735862426 | -0,33916042 |  |
| 1554866_at   | TMEM135        | -3,07502285  | -2,735862426 | -0,33916042 |  |
| 1562133_x_at | ZNF90          | -3,07502285  | -2,735862426 | -0,33916042 |  |
| 1562558_at   | LOC440704      | -3,07502285  | -2,735862426 | -0,33916042 |  |
| 1565614_at   | -              | -3,07502285  | -2,735862426 | -0,33916042 |  |
| 1566459_at   | -              | -3,07502285  | -2,735862426 | -0,33916042 |  |
| 1567697_at   | -              | -3,07502285  | -2,735862426 | -0,33916042 |  |
| 1569927_at   | -              | -3,07502285  | -2,735862426 | -0,33916042 |  |
| 214078_at    | -              | -3,07502285  | -2,735862426 | -0,33916042 |  |
| 221145_at    | -              | -3,07502285  | -2,735862426 | -0,33916042 |  |
| 234105_at    | -              | -3,07502285  | -2,735862426 | -0,33916042 |  |
| 237939_at    | EPHA5          | -3,07502285  | -2,735862426 | -0,33916042 |  |
| 240820_at    | -              | -3,07502285  | -2,735862426 | -0,33916042 |  |
| 242967_at    | -              | -3,07502285  | -2,735862426 | -0,33916042 |  |
| 43427_at     | ACACB          | -0,259786591 | 0,079429697  | -0,33921629 |  |
| 1562606_a_at | LOC440028      | -0,622910612 | -0,283667828 | -0,33924278 |  |
| 1565862_a_at | -              | -0,622910612 | -0,283667828 | -0,33924278 |  |
| 1566513_a_at | GNG4           | -0,622910612 | -0,283667828 | -0,33924278 |  |
| 202509_s_at  | TNFAIP2        | -0,622910612 | -0,283667828 | -0,33924278 |  |
| 214225_at    | PIN4           | -0,622910612 | -0,283667828 | -0,33924278 |  |
| 225249_at    | SPPL2B         | -0,622910612 | -0,283667828 | -0,33924278 |  |
| 221926_s_at  | IL17RC         | -0,259832361 | 0,079428135  | -0,3392605  |  |
| 240887_at    | LOC100506470   | -0,259832361 | 0,079428135  | -0,3392605  |  |
| 1556919_at   | LEPR           | -0,089689931 | 0,249604176  | -0,33929411 |  |
| 206521_s_at  | GTF2A1         | -0,089689931 | 0,249604176  | -0,33929411 |  |
| 216875_x_at  | HAB1           | -0,089689931 | 0,249604176  | -0,33929411 |  |
| 235930_at    | KCNMB4         | -0,089689931 | 0,249604176  | -0,33929411 |  |
| 238444_at    | ZNF618         | -0,089689931 | 0,249604176  | -0,33929411 |  |
| 223960_s_at  | C16orf5        | 2,325288363  | 2,664608955  | -0,33932059 |  |
| 226176_s_at  | USP42          | 1,534677255  | 1,874012195  | -0,33933494 |  |
| 226340_x_at  | WASH1 /// WASH | 3,891817836  | 4,231314909  | -0,33949707 |  |
| 1552424_at   | KLHL10         | -2,551294263 | -2,211750327 | -0,33954394 |  |
| 1554621_at   | DGKE           | -2,551294263 | -2,211750327 | -0,33954394 |  |
| 1569290_s_at | GRIA3          | -2,551294263 | -2,211750327 | -0,33954394 |  |
| 208366_at    | PCDH11X        | -2,551294263 | -2,211750327 | -0,33954394 |  |
| 215122_at    | TBX6           | -2,551294263 | -2,211750327 | -0,33954394 |  |
| 216638_s_at  | PRLR           | -2,551294263 | -2,211750327 | -0,33954394 |  |
| 222063_s_at  | CDS1           | -2,551294263 | -2,211750327 | -0,33954394 |  |
| 223853_at    | BVES           | -2,551294263 | -2,211750327 | -0,33954394 |  |
| 227070_at    | GLT8D2         | -2,551294263 | -2,211750327 | -0,33954394 |  |
| 230520_at    | AIG1           | -2,551294263 | -2,211750327 | -0,33954394 |  |



|              |              |              |              |             |  |
|--------------|--------------|--------------|--------------|-------------|--|
| 231650_s_at  | SEZ6L        | -2,551294263 | -2,211750327 | -0,33954394 |  |
| 232771_at    | NRK          | -2,551294263 | -2,211750327 | -0,33954394 |  |
| 233964_at    | -            | -2,551294263 | -2,211750327 | -0,33954394 |  |
| 235044_at    | CYYR1        | -2,551294263 | -2,211750327 | -0,33954394 |  |
| 237905_at    | KRT25        | -2,551294263 | -2,211750327 | -0,33954394 |  |
| 241571_at    | -            | -2,551294263 | -2,211750327 | -0,33954394 |  |
| 1554420_at   | ATF3         | -0,986356909 | -0,646746079 | -0,33961083 |  |
| 1554954_at   | C21orf90     | -0,986356909 | -0,646746079 | -0,33961083 |  |
| 1570331_at   | -            | -0,986356909 | -0,646746079 | -0,33961083 |  |
| 204499_at    | AGTPBP1      | -0,986356909 | -0,646746079 | -0,33961083 |  |
| 206242_at    | TM4SF5       | -0,986356909 | -0,646746079 | -0,33961083 |  |
| 210347_s_at  | BCL11A       | -0,986356909 | -0,646746079 | -0,33961083 |  |
| 211314_at    | CACNA1G      | -0,986356909 | -0,646746079 | -0,33961083 |  |
| 220727_at    | KCNK10       | -0,986356909 | -0,646746079 | -0,33961083 |  |
| 222760_at    | ZNF703       | -0,986356909 | -0,646746079 | -0,33961083 |  |
| 226872_at    | RFX2         | -0,986356909 | -0,646746079 | -0,33961083 |  |
| 1552643_at   | ZNF626       | -1,763254337 | -1,423348341 | -0,339906   |  |
| 1553821_at   | C12orf51     | -1,763254337 | -1,423348341 | -0,339906   |  |
| 1563255_at   | LOC100506733 | -1,763254337 | -1,423348341 | -0,339906   |  |
| 203104_at    | CSF1R        | -1,763254337 | -1,423348341 | -0,339906   |  |
| 205511_at    | FLJ10038     | -1,763254337 | -1,423348341 | -0,339906   |  |
| 205984_at    | CRHBP        | -1,763254337 | -1,423348341 | -0,339906   |  |
| 208200_at    | IL1A         | -1,763254337 | -1,423348341 | -0,339906   |  |
| 214905_at    | RASGRF1      | -1,763254337 | -1,423348341 | -0,339906   |  |
| 215785_s_at  | CYFIP2       | -1,763254337 | -1,423348341 | -0,339906   |  |
| 215852_x_at  | SOGA1        | -1,763254337 | -1,423348341 | -0,339906   |  |
| 221243_s_at  | -            | -1,763254337 | -1,423348341 | -0,339906   |  |
| 227321_at    | GATS         | -1,763254337 | -1,423348341 | -0,339906   |  |
| 228965_s_at  | PANK2        | -1,763254337 | -1,423348341 | -0,339906   |  |
| 229213_at    | DIRC2        | -1,763254337 | -1,423348341 | -0,339906   |  |
| 230636_s_at  | KLF9         | -1,763254337 | -1,423348341 | -0,339906   |  |
| 234609_at    | -            | -1,763254337 | -1,423348341 | -0,339906   |  |
| 239088_at    | -            | -1,763254337 | -1,423348341 | -0,339906   |  |
| 242440_at    | -            | -1,763254337 | -1,423348341 | -0,339906   |  |
| 226029_at    | VANGL2       | 1,292162421  | 1,632095957  | -0,33993354 |  |
| 201895_at    | ARAF         | 2,882181479  | 3,222126232  | -0,33994475 |  |
| 228819_at    | TSPAN18      | 1,394109935  | 1,73441697   | -0,34030703 |  |
| 218595_s_at  | HEATR1       | 4,079482587  | 4,419948427  | -0,34046584 |  |
| 1554408_a_at | TK1          | 3,105247586  | 3,445853256  | -0,34060567 |  |
| 1563692_at   | -            | -1,196375121 | -0,855751026 | -0,3406241  |  |
| 1565911_at   | LOC283693    | -1,196375121 | -0,855751026 | -0,3406241  |  |
| 1566633_at   | -            | -1,196375121 | -0,855751026 | -0,3406241  |  |
| 1570025_at   | TACC2        | -1,196375121 | -0,855751026 | -0,3406241  |  |
| 205757_at    | ENTPD5       | -1,196375121 | -0,855751026 | -0,3406241  |  |
| 211211_x_at  | SH2D1A       | -1,196375121 | -0,855751026 | -0,3406241  |  |
| 220312_at    | FAM83E       | -1,196375121 | -0,855751026 | -0,3406241  |  |
| 231572_at    | PRSS37       | -1,196375121 | -0,855751026 | -0,3406241  |  |
| 234425_at    | -            | -1,196375121 | -0,855751026 | -0,3406241  |  |
| 237095_at    | ASXL2        | -1,196375121 | -0,855751026 | -0,3406241  |  |
| 242022_at    | -            | -1,196375121 | -0,855751026 | -0,3406241  |  |
| 244212_at    | -            | -1,196375121 | -0,855751026 | -0,3406241  |  |
| 210060_at    | PDE6G        | 0,592200562  | 0,932882274  | -0,34068171 |  |
| 225474_at    | MAGI1        | 0,592200562  | 0,932882274  | -0,34068171 |  |
| 1557746_at   | -            | -3,37835     | -3,037500868 | -0,34084913 |  |
| 1561156_at   | -            | -3,37835     | -3,037500868 | -0,34084913 |  |
| 1566624_at   | -            | -3,37835     | -3,037500868 | -0,34084913 |  |

|              |                  |              |              |             |  |
|--------------|------------------|--------------|--------------|-------------|--|
| 1569557_at   | ZNF248           | -0,83191556  | -0,490927335 | -0,34098822 |  |
| 207644_at    | FOXH1            | -0,83191556  | -0,490927335 | -0,34098822 |  |
| 216059_at    | PAX3             | -0,83191556  | -0,490927335 | -0,34098822 |  |
| 217542_at    | MDM2             | -0,83191556  | -0,490927335 | -0,34098822 |  |
| 223789_s_at  | GTPBP2           | -0,83191556  | -0,490927335 | -0,34098822 |  |
| 230228_at    | SSC5D            | -0,83191556  | -0,490927335 | -0,34098822 |  |
| 230453_s_at  | ATP2A3           | -0,83191556  | -0,490927335 | -0,34098822 |  |
| 234698_at    | N6AMT1           | -0,83191556  | -0,490927335 | -0,34098822 |  |
| 242951_at    | -                | -0,83191556  | -0,490927335 | -0,34098822 |  |
| 206673_at    | GPR176           | -0,759588698 | -0,41858459  | -0,34100411 |  |
| 226067_at    | BPIFB1           | -0,759588698 | -0,41858459  | -0,34100411 |  |
| 232970_at    | -                | -0,759588698 | -0,41858459  | -0,34100411 |  |
| 237031_at    | -                | -0,759588698 | -0,41858459  | -0,34100411 |  |
| 224338_s_at  | RNF26            | 0,317354302  | 0,658444279  | -0,34108998 |  |
| 238812_at    | -                | 0,317354302  | 0,658444279  | -0,34108998 |  |
| 244165_at    | FAM208B          | 1,742232072  | 2,083632167  | -0,34140009 |  |
| 229297_at    | C14orf118        | 1,485482016  | 1,826973888  | -0,34149187 |  |
| 242827_x_at  | -                | 1,238353345  | 1,579853228  | -0,34149988 |  |
| 1568873_at   | ZNF519           | 0,052199481  | 0,393761504  | -0,34156202 |  |
| 219442_at    | KIAA0664L3       | 0,052199481  | 0,393761504  | -0,34156202 |  |
| 230272_at    | LINC00461 /// MI | 0,052199481  | 0,393761504  | -0,34156202 |  |
| 1570210_x_at | PPP6R2           | 0,859074518  | 1,200746069  | -0,34167155 |  |
| 200998_s_at  | CKAP4            | 2,28383338   | 2,625627364  | -0,34179398 |  |
| 210616_s_at  | SEC31A           | 3,159334685  | 3,501209806  | -0,34187512 |  |
| 225787_at    | UBE2F            | 3,436222554  | 3,778101865  | -0,34187931 |  |
| 212317_at    | TNPO3            | 4,15705639   | 4,498973142  | -0,34191675 |  |
| 1552554_a_at | NLRC4            | -2,504600601 | -2,162639771 | -0,34196083 |  |
| 1559114_a_at | CXCR7            | -2,504600601 | -2,162639771 | -0,34196083 |  |
| 1559689_a_at | GRAPL            | -2,504600601 | -2,162639771 | -0,34196083 |  |
| 1559980_at   | ZNF7             | -2,504600601 | -2,162639771 | -0,34196083 |  |
| 1560877_a_at | -                | -2,504600601 | -2,162639771 | -0,34196083 |  |
| 1565913_at   | -                | -2,504600601 | -2,162639771 | -0,34196083 |  |
| 1569917_at   | -                | -2,504600601 | -2,162639771 | -0,34196083 |  |
| 206881_s_at  | LILRA3 /// LOC10 | -2,504600601 | -2,162639771 | -0,34196083 |  |
| 210861_s_at  | WISP3            | -2,504600601 | -2,162639771 | -0,34196083 |  |
| 213953_at    | KRT20            | -2,504600601 | -2,162639771 | -0,34196083 |  |
| 217056_at    | YME1L1           | -2,504600601 | -2,162639771 | -0,34196083 |  |
| 221748_s_at  | TNS1             | -2,504600601 | -2,162639771 | -0,34196083 |  |
| 224056_at    | -                | -2,504600601 | -2,162639771 | -0,34196083 |  |
| 224115_at    | -                | -2,504600601 | -2,162639771 | -0,34196083 |  |
| 224270_at    | OCR1             | -2,504600601 | -2,162639771 | -0,34196083 |  |
| 231941_s_at  | MUC20            | -2,504600601 | -2,162639771 | -0,34196083 |  |
| 232877_at    | -                | -2,504600601 | -2,162639771 | -0,34196083 |  |
| 233247_x_at  | ZDHHC21          | -2,504600601 | -2,162639771 | -0,34196083 |  |
| 234967_at    | IL6ST            | -2,504600601 | -2,162639771 | -0,34196083 |  |
| 236764_at    | -                | -2,504600601 | -2,162639771 | -0,34196083 |  |
| 237281_at    | AKAP14           | -2,504600601 | -2,162639771 | -0,34196083 |  |
| 241005_at    | -                | -2,504600601 | -2,162639771 | -0,34196083 |  |
| 241677_x_at  | -                | -2,504600601 | -2,162639771 | -0,34196083 |  |
| 241947_at    | PCED1B-AS1       | -2,504600601 | -2,162639771 | -0,34196083 |  |
| 1556479_at   | -                | 0,917308734  | 1,259496994  | -0,34218826 |  |
| 1555526_a_at | 38961            | -0,366776884 | -0,024572586 | -0,3422043  |  |
| 1558742_at   | -                | -0,366776884 | -0,024572586 | -0,3422043  |  |
| 1561749_at   | -                | -0,366776884 | -0,024572586 | -0,3422043  |  |
| 1566168_at   | -                | -0,366776884 | -0,024572586 | -0,3422043  |  |
| 207124_s_at  | GNB5             | -0,366776884 | -0,024572586 | -0,3422043  |  |

|              |                |              |              |             |  |
|--------------|----------------|--------------|--------------|-------------|--|
| 209981_at    | CSDC2          | -0,366776884 | -0,024572586 | -0,3422043  |  |
| 214963_at    | NUP160         | -0,366776884 | -0,024572586 | -0,3422043  |  |
| 217421_at    | PIWIL2         | -0,366776884 | -0,024572586 | -0,3422043  |  |
| 221460_at    | OR2C1          | -0,366776884 | -0,024572586 | -0,3422043  |  |
| 228465_at    | -              | -0,366776884 | -0,024572586 | -0,3422043  |  |
| 231595_at    | MRVI1-AS1      | -0,366776884 | -0,024572586 | -0,3422043  |  |
| 220918_at    | RUNX1-IT1      | 1,119359127  | 1,461646549  | -0,34228742 |  |
| 1553730_x_at | LRRC43         | 1,954567604  | 2,297144887  | -0,34257728 |  |
| 203590_at    | DYNC1LI2       | 1,823660386  | 2,166264721  | -0,34260434 |  |
| 214358_at    | ACACA          | 0,97328325   | 1,315948728  | -0,34266548 |  |
| 1554076_s_at | TMEM136        | 0,425644434  | 0,768343791  | -0,34269936 |  |
| 206006_s_at  | KIAA1009       | 0,425644434  | 0,768343791  | -0,34269936 |  |
| 230659_at    | -              | 0,425644434  | 0,768343791  | -0,34269936 |  |
| 223025_s_at  | AP1M1          | 2,159061673  | 2,501934108  | -0,34287243 |  |
| 223116_at    | BCAR1          | 0,606430281  | 0,949447784  | -0,3430175  |  |
| 215697_at    | -              | 0,246434561  | 0,589657387  | -0,34322283 |  |
| 205178_s_at  | RBBP6          | 2,86748657   | 3,210719429  | -0,34323286 |  |
| 211948_x_at  | PRRC2C         | 3,571118904  | 3,914426433  | -0,34330753 |  |
| 209557_s_at  | NCDN           | 0,503742507  | 0,847075464  | -0,34333296 |  |
| 210129_s_at  | ARPC4-TTL3 /// | 0,503742507  | 0,847075464  | -0,34333296 |  |
| 239121_at    | -              | 0,503742507  | 0,847075464  | -0,34333296 |  |
| 244453_at    | ANKRD53        | 0,503742507  | 0,847075464  | -0,34333296 |  |
| 1554863_s_at | DOK5           | -1,353583928 | -1,010192375 | -0,34339155 |  |
| 1555990_at   | C22orf42       | -1,353583928 | -1,010192375 | -0,34339155 |  |
| 1557495_at   | -              | -1,353583928 | -1,010192375 | -0,34339155 |  |
| 1560827_at   | -              | -1,353583928 | -1,010192375 | -0,34339155 |  |
| 1561345_at   | -              | -1,353583928 | -1,010192375 | -0,34339155 |  |
| 204736_s_at  | CSPG4          | -1,353583928 | -1,010192375 | -0,34339155 |  |
| 206963_s_at  | NAT8 /// NAT8B | -1,353583928 | -1,010192375 | -0,34339155 |  |
| 207091_at    | P2RX7          | -1,353583928 | -1,010192375 | -0,34339155 |  |
| 210884_s_at  | SPAG11A        | -1,353583928 | -1,010192375 | -0,34339155 |  |
| 211269_s_at  | IL2RA          | -1,353583928 | -1,010192375 | -0,34339155 |  |
| 216599_x_at  | SLC22A6        | -1,353583928 | -1,010192375 | -0,34339155 |  |
| 216781_at    | KIAA1751       | -1,353583928 | -1,010192375 | -0,34339155 |  |
| 226056_at    | ARHGAP31       | -1,353583928 | -1,010192375 | -0,34339155 |  |
| 230262_at    | ST8SIA3        | -1,353583928 | -1,010192375 | -0,34339155 |  |
| 230485_at    | PHGR1          | -1,353583928 | -1,010192375 | -0,34339155 |  |
| 233922_at    | -              | -1,353583928 | -1,010192375 | -0,34339155 |  |
| 1554332_a_at | LOC100127888   | -0,234278768 | 0,109221392  | -0,34350016 |  |
| 220427_at    | OBSCN          | -0,234278768 | 0,109221392  | -0,34350016 |  |
| 224620_at    | MAPK1          | -0,234278768 | 0,109221392  | -0,34350016 |  |
| 242668_x_at  | SUN5           | 1,515954005  | 1,859476797  | -0,34352279 |  |
| 213164_at    | SLC5A3         | 4,268075451  | 4,611678537  | -0,34360309 |  |
| 240155_x_at  | ZNF493         | 1,462198073  | 1,805902329  | -0,34370426 |  |
| 1570242_x_at | SPATA21        | -0,423248115 | -0,079522948 | -0,34372517 |  |
| 210332_at    | ACHE           | -0,423248115 | -0,079522948 | -0,34372517 |  |
| 213885_at    | TRIM3          | -0,423248115 | -0,079522948 | -0,34372517 |  |
| 235541_at    | LAS1L          | -0,423248115 | -0,079522948 | -0,34372517 |  |
| 203943_at    | KIF3B          | 2,094906514  | 2,438805127  | -0,34389861 |  |
| 241650_x_at  | HMCN2 /// LOC1 | 0,57782909   | 0,921731975  | -0,34390288 |  |
| 1560717_at   | -              | -3,482633686 | -3,138626879 | -0,34400681 |  |
| 228692_at    | PREX2          | -3,482633686 | -3,138626879 | -0,34400681 |  |
| 1554085_at   | DDX51          | 0,928678725  | 1,272721751  | -0,34404303 |  |
| 227980_at    | ZNF322         | 3,063308547  | 3,407399455  | -0,34409091 |  |
| 201085_s_at  | SON            | 2,446911392  | 2,791007185  | -0,34409579 |  |
| 1552857_a_at | HTR6           | -1,838812296 | -1,494668682 | -0,34414361 |  |

|              |                 |              |              |             |  |
|--------------|-----------------|--------------|--------------|-------------|--|
| 1554615_at   | -               | -1,838812296 | -1,494668682 | -0,34414361 |  |
| 1561327_at   | LINC00242       | -1,838812296 | -1,494668682 | -0,34414361 |  |
| 1562659_at   | LOC400548       | -1,838812296 | -1,494668682 | -0,34414361 |  |
| 1565909_at   | -               | -1,838812296 | -1,494668682 | -0,34414361 |  |
| 1569365_a_at | KIAA1656        | -1,838812296 | -1,494668682 | -0,34414361 |  |
| 201984_s_at  | EGFR            | -1,838812296 | -1,494668682 | -0,34414361 |  |
| 205698_s_at  | MAP2K6          | -1,838812296 | -1,494668682 | -0,34414361 |  |
| 206054_at    | KNG1            | -1,838812296 | -1,494668682 | -0,34414361 |  |
| 208157_at    | SIM2            | -1,838812296 | -1,494668682 | -0,34414361 |  |
| 208510_s_at  | PPARG           | -1,838812296 | -1,494668682 | -0,34414361 |  |
| 211890_x_at  | CAPN3           | -1,838812296 | -1,494668682 | -0,34414361 |  |
| 212580_at    | CAST            | -1,838812296 | -1,494668682 | -0,34414361 |  |
| 213985_s_at  | C19orf6         | -1,838812296 | -1,494668682 | -0,34414361 |  |
| 219103_at    | ASAP3           | -1,838812296 | -1,494668682 | -0,34414361 |  |
| 220225_at    | IRX4            | -1,838812296 | -1,494668682 | -0,34414361 |  |
| 221714_s_at  | RRN3P1          | -1,838812296 | -1,494668682 | -0,34414361 |  |
| 229909_at    | B4GALNT3        | -1,838812296 | -1,494668682 | -0,34414361 |  |
| 233492_s_at  | LOC728377 /// O | -1,838812296 | -1,494668682 | -0,34414361 |  |
| 235898_at    | -               | -1,838812296 | -1,494668682 | -0,34414361 |  |
| 240362_at    | BRP44L          | -1,838812296 | -1,494668682 | -0,34414361 |  |
| 241714_at    | -               | -1,838812296 | -1,494668682 | -0,34414361 |  |
| 242861_at    | NEDD9           | -1,838812296 | -1,494668682 | -0,34414361 |  |
| 1553832_at   | LINC00315       | -0,033456564 | 0,310717132  | -0,3441737  |  |
| 213078_x_at  | LPCAT4          | -0,033456564 | 0,310717132  | -0,3441737  |  |
| 208392_x_at  | SP110           | 1,446464021  | 1,790660532  | -0,34419651 |  |
| 1559272_at   | EXOC3L1         | 0,695652136  | 1,039887232  | -0,3442351  |  |
| 244826_at    | -               | 1,331241794  | 1,675891488  | -0,34464969 |  |
| 230728_at    | FKBP14          | 2,352981171  | 2,697670403  | -0,34468923 |  |
| 230421_at    | ZNF879          | 0,359971644  | 0,704715219  | -0,34474358 |  |
| 1554352_s_at | DENND4A         | 1,844820248  | 2,189694216  | -0,34487397 |  |
| 219324_at    | NOL12           | 1,58584542   | 1,930732138  | -0,34488672 |  |
| 212803_at    | NAB2            | 1,269985355  | 1,614891062  | -0,34490571 |  |
| 221560_at    | MARK4           | 2,292660284  | 2,637603218  | -0,34494293 |  |
| 207016_s_at  | ALDH1A2         | -0,285837228 | 0,059218869  | -0,3450561  |  |
| 241704_x_at  | ZNF320          | 1,05337236   | 1,398700978  | -0,34532862 |  |
| 202592_at    | BLOC1S1         | 2,122398022  | 2,467842989  | -0,34544497 |  |
| 214737_x_at  | HNRNPC /// LOC  | 6,342710883  | 6,688180274  | -0,34546939 |  |
| 227156_at    | CASK            | 0,735041319  | 1,080561626  | -0,34552031 |  |
| 1552430_at   | WDR17           | -3,192553003 | -2,847001814 | -0,34555119 |  |
| 1562999_x_at | -               | -3,192553003 | -2,847001814 | -0,34555119 |  |
| 1566969_at   | -               | -3,192553003 | -2,847001814 | -0,34555119 |  |
| 1569469_a_at | LHX8            | -3,192553003 | -2,847001814 | -0,34555119 |  |
| 208065_at    | ST8SIA3         | -3,192553003 | -2,847001814 | -0,34555119 |  |
| 217428_s_at  | COL10A1         | -3,192553003 | -2,847001814 | -0,34555119 |  |
| 231339_at    | TSPYL6          | -3,192553003 | -2,847001814 | -0,34555119 |  |
| 241287_x_at  | -               | -3,192553003 | -2,847001814 | -0,34555119 |  |
| 244283_x_at  | -               | -3,192553003 | -2,847001814 | -0,34555119 |  |
| 1558116_x_at | RECK            | 0,171847695  | 0,51742585   | -0,34557815 |  |
| 1552583_s_at | ABCC13          | -2,43257096  | -2,086984744 | -0,34558622 |  |
| 1553500_at   | FBXL21          | -2,43257096  | -2,086984744 | -0,34558622 |  |
| 1560176_s_at | PPP4R1L         | -2,43257096  | -2,086984744 | -0,34558622 |  |
| 1560814_a_at | C15orf57        | -2,43257096  | -2,086984744 | -0,34558622 |  |
| 215443_at    | TSHR            | -2,43257096  | -2,086984744 | -0,34558622 |  |
| 215940_at    | -               | -2,43257096  | -2,086984744 | -0,34558622 |  |
| 218885_s_at  | GALNT12         | -2,43257096  | -2,086984744 | -0,34558622 |  |
| 219386_s_at  | SLAMF8          | -2,43257096  | -2,086984744 | -0,34558622 |  |

|              |              |              |              |             |  |
|--------------|--------------|--------------|--------------|-------------|--|
| 220909_at    | TRIM46       | -2,43257096  | -2,086984744 | -0,34558622 |  |
| 221143_at    | RPA4         | -2,43257096  | -2,086984744 | -0,34558622 |  |
| 221178_at    | BAIAP2L2     | -2,43257096  | -2,086984744 | -0,34558622 |  |
| 232947_at    | -            | -2,43257096  | -2,086984744 | -0,34558622 |  |
| 234282_at    | -            | -2,43257096  | -2,086984744 | -0,34558622 |  |
| 234785_at    | -            | -2,43257096  | -2,086984744 | -0,34558622 |  |
| 235111_at    | LSAMP        | -2,43257096  | -2,086984744 | -0,34558622 |  |
| 236051_at    | -            | -2,43257096  | -2,086984744 | -0,34558622 |  |
| 237252_at    | THBD         | -2,43257096  | -2,086984744 | -0,34558622 |  |
| 241312_at    | -            | -2,43257096  | -2,086984744 | -0,34558622 |  |
| 244273_at    | -            | -2,43257096  | -2,086984744 | -0,34558622 |  |
| 244331_at    | -            | -2,43257096  | -2,086984744 | -0,34558622 |  |
| 211336_x_at  | LILRB1       | -0,078265071 | 0,26733076   | -0,34559583 |  |
| 215606_s_at  | ERC1         | -0,078265071 | 0,26733076   | -0,34559583 |  |
| 242423_x_at  | -            | -0,078265071 | 0,26733076   | -0,34559583 |  |
| 225625_at    | ALKBH2       | 1,940595304  | 2,286318242  | -0,34572294 |  |
| 1564439_a_at | C11orf36     | 0,518867317  | 0,864649967  | -0,34578265 |  |
| 232932_at    | -            | 0,518867317  | 0,864649967  | -0,34578265 |  |
| 203315_at    | NCK2         | 2,077135162  | 2,423075926  | -0,34594076 |  |
| 209513_s_at  | HSDL2        | 2,077135162  | 2,423075926  | -0,34594076 |  |
| 217132_at    | -            | -3,342483913 | -2,996335703 | -0,34614821 |  |
| 238370_x_at  | -            | -3,342483913 | -2,996335703 | -0,34614821 |  |
| 225638_at    | C1orf31      | 2,864529541  | 3,210719429  | -0,34618989 |  |
| 206695_x_at  | ZNF43        | 2,416948786  | 2,763166224  | -0,34621744 |  |
| 217183_at    | LDLR         | 0,03125738   | 0,377530647  | -0,34627327 |  |
| 1554314_at   | C6orf141     | -1,888254346 | -1,541908042 | -0,3463463  |  |
| 1566981_at   | -            | -1,888254346 | -1,541908042 | -0,3463463  |  |
| 206609_at    | MAGEC1       | -1,888254346 | -1,541908042 | -0,3463463  |  |
| 210960_at    | ADRA1D       | -1,888254346 | -1,541908042 | -0,3463463  |  |
| 211209_x_at  | SH2D1A       | -1,888254346 | -1,541908042 | -0,3463463  |  |
| 216184_s_at  | RIMS1        | -1,888254346 | -1,541908042 | -0,3463463  |  |
| 223565_at    | MZB1         | -1,888254346 | -1,541908042 | -0,3463463  |  |
| 236747_at    | LOC100507066 | -1,888254346 | -1,541908042 | -0,3463463  |  |
| 239840_at    | -            | -1,888254346 | -1,541908042 | -0,3463463  |  |
| 240515_at    | -            | -1,888254346 | -1,541908042 | -0,3463463  |  |
| 241563_at    | -            | -1,888254346 | -1,541908042 | -0,3463463  |  |
| 214692_s_at  | JRK          | 1,795990708  | 2,14244844   | -0,34645773 |  |
| 227252_at    | LRP10        | 2,082235068  | 2,428994491  | -0,34675942 |  |
| 1556601_a_at | SPATA13      | -1,026571149 | -0,679763839 | -0,34680731 |  |
| 1569940_at   | SLC6A16      | -1,026571149 | -0,679763839 | -0,34680731 |  |
| 210846_x_at  | TRIM14       | -1,026571149 | -0,679763839 | -0,34680731 |  |
| 214627_at    | EPX          | -1,026571149 | -0,679763839 | -0,34680731 |  |
| 217179_x_at  | -            | -1,026571149 | -0,679763839 | -0,34680731 |  |
| 219135_s_at  | LMF1         | -1,026571149 | -0,679763839 | -0,34680731 |  |
| 221239_s_at  | FCRL2        | -1,026571149 | -0,679763839 | -0,34680731 |  |
| 222219_s_at  | TLE6         | -1,026571149 | -0,679763839 | -0,34680731 |  |
| 234787_at    | DKFZp564H213 | -1,026571149 | -0,679763839 | -0,34680731 |  |
| 238954_at    | -            | -1,026571149 | -0,679763839 | -0,34680731 |  |
| 241505_at    | -            | -1,026571149 | -0,679763839 | -0,34680731 |  |
| 242882_at    | RNF207       | -1,026571149 | -0,679763839 | -0,34680731 |  |
| 244537_at    | -            | -1,026571149 | -0,679763839 | -0,34680731 |  |
| 225248_at    | SPPL2B       | 0,133056859  | 0,479907041  | -0,34685018 |  |
| 235231_at    | ZNF789       | 1,434549838  | 1,781437557  | -0,34688772 |  |
| 211574_s_at  | CD46         | 2,371846398  | 2,718761062  | -0,34691466 |  |
| 206246_at    | PFKFB4       | -0,543051993 | -0,19610998  | -0,34694201 |  |
| 225488_at    | DERL1        | -0,543051993 | -0,19610998  | -0,34694201 |  |

|              |                   |              |              |             |  |
|--------------|-------------------|--------------|--------------|-------------|--|
| 228922_at    | SHF               | -0,543051993 | -0,19610998  | -0,34694201 |  |
| 207826_s_at  | ID3               | 0,291166226  | 0,638150376  | -0,34698415 |  |
| 1556420_s_at | YPEL2             | -2,384869671 | -2,037551727 | -0,34731794 |  |
| 1557898_at   | -                 | -2,384869671 | -2,037551727 | -0,34731794 |  |
| 1559732_at   | NUB1              | -2,384869671 | -2,037551727 | -0,34731794 |  |
| 1564706_s_at | GLS2              | -2,384869671 | -2,037551727 | -0,34731794 |  |
| 1566778_at   | -                 | -2,384869671 | -2,037551727 | -0,34731794 |  |
| 206319_s_at  | SPINLW1 /// SPII  | -2,384869671 | -2,037551727 | -0,34731794 |  |
| 230817_at    | -                 | -2,384869671 | -2,037551727 | -0,34731794 |  |
| 233349_at    | TLK2              | -2,384869671 | -2,037551727 | -0,34731794 |  |
| 235319_at    | LOC100216546      | -2,384869671 | -2,037551727 | -0,34731794 |  |
| 237117_at    | -                 | -2,384869671 | -2,037551727 | -0,34731794 |  |
| 239195_at    | -                 | -2,384869671 | -2,037551727 | -0,34731794 |  |
| 241819_at    | TNFSF8            | -2,384869671 | -2,037551727 | -0,34731794 |  |
| 242534_at    | EVI5L             | -2,384869671 | -2,037551727 | -0,34731794 |  |
| 1555719_a_at | C3orf15 /// LOC1  | -2,756478458 | -2,408705138 | -0,34777332 |  |
| 1555997_s_at | IGFBP5            | -2,756478458 | -2,408705138 | -0,34777332 |  |
| 1558806_at   | -                 | -2,756478458 | -2,408705138 | -0,34777332 |  |
| 1560418_at   | CEP57L1           | -2,756478458 | -2,408705138 | -0,34777332 |  |
| 1562690_at   | -                 | -2,756478458 | -2,408705138 | -0,34777332 |  |
| 1566739_at   | PLCE1             | -2,756478458 | -2,408705138 | -0,34777332 |  |
| 1569193_at   | -                 | -2,756478458 | -2,408705138 | -0,34777332 |  |
| 1569377_at   | TMEM67            | -2,756478458 | -2,408705138 | -0,34777332 |  |
| 1569656_at   | -                 | -2,756478458 | -2,408705138 | -0,34777332 |  |
| 208282_x_at  | DAZ1 /// DAZ2 /// | -2,756478458 | -2,408705138 | -0,34777332 |  |
| 216634_at    | PLCH1             | -2,756478458 | -2,408705138 | -0,34777332 |  |
| 219728_at    | MYOT              | -2,756478458 | -2,408705138 | -0,34777332 |  |
| 219890_at    | CLEC5A            | -2,756478458 | -2,408705138 | -0,34777332 |  |
| 229011_at    | -                 | -2,756478458 | -2,408705138 | -0,34777332 |  |
| 232410_at    | -                 | -2,756478458 | -2,408705138 | -0,34777332 |  |
| 233937_at    | GGNBP2            | -2,756478458 | -2,408705138 | -0,34777332 |  |
| 236469_at    | -                 | -2,756478458 | -2,408705138 | -0,34777332 |  |
| 237428_at    | C5orf48           | -2,756478458 | -2,408705138 | -0,34777332 |  |
| 241780_at    | -                 | -2,756478458 | -2,408705138 | -0,34777332 |  |
| 241805_at    | GABRG1            | -2,756478458 | -2,408705138 | -0,34777332 |  |
| 242555_at    | C16orf87          | -2,756478458 | -2,408705138 | -0,34777332 |  |
| 242758_x_at  | KDM3A             | -2,756478458 | -2,408705138 | -0,34777332 |  |
| 243794_at    | -                 | -2,756478458 | -2,408705138 | -0,34777332 |  |
| 219680_at    | NLRX1             | 1,360921491  | 1,708698295  | -0,3477768  |  |
| 209901_x_at  | AIF1              | 1,560488174  | 1,908311039  | -0,34782287 |  |
| 239151_at    | LOC399753         | 0,767063567  | 1,115234684  | -0,34817112 |  |
| 217419_x_at  | AGRN              | 0,82905153   | 1,177496821  | -0,34844529 |  |
| 229286_at    | MAGEE1            | 0,82905153   | 1,177496821  | -0,34844529 |  |
| 204277_s_at  | TK2               | -0,394749123 | -0,046302147 | -0,34844698 |  |
| 217588_at    | CATSPER2 /// CA   | -0,394749123 | -0,046302147 | -0,34844698 |  |
| 221382_at    | -                 | -0,394749123 | -0,046302147 | -0,34844698 |  |
| 224901_at    | SCD5              | 0,888485433  | 1,23718272   | -0,34869729 |  |
| 221297_at    | GPRC5D            | -0,172274514 | 0,176436073  | -0,34871059 |  |
| 239504_at    | -                 | -0,172274514 | 0,176436073  | -0,34871059 |  |
| 242542_at    | -                 | -0,172274514 | 0,176436073  | -0,34871059 |  |
| 244886_at    | LOC389641         | -0,172274514 | 0,176436073  | -0,34871059 |  |
| 202724_s_at  | FOXO1             | 2,611163891  | 2,959949103  | -0,34878521 |  |
| 213314_at    | C6orf162          | 0,555999837  | 0,904843258  | -0,34884342 |  |
| 227250_at    | KREMEN1           | 0,555999837  | 0,904843258  | -0,34884342 |  |
| 244246_at    | MIPOL1            | 2,089851283  | 2,438805127  | -0,34895384 |  |
| 223980_s_at  | SP110             | 1,954567604  | 2,303602088  | -0,34903448 |  |

|              |                 |              |              |             |  |
|--------------|-----------------|--------------|--------------|-------------|--|
| 1552307_a_at | TTC39C          | -1,964176657 | -1,615132408 | -0,34904425 |  |
| 1564039_at   | ZSCAN23         | -1,964176657 | -1,615132408 | -0,34904425 |  |
| 1567273_at   | OR2K2           | -1,964176657 | -1,615132408 | -0,34904425 |  |
| 1569603_at   | -               | -1,964176657 | -1,615132408 | -0,34904425 |  |
| 1570433_at   | TMPRSS2         | -1,964176657 | -1,615132408 | -0,34904425 |  |
| 206871_at    | ELANE           | -1,964176657 | -1,615132408 | -0,34904425 |  |
| 206902_s_at  | EXOG            | -1,964176657 | -1,615132408 | -0,34904425 |  |
| 207955_at    | CCL27           | -1,964176657 | -1,615132408 | -0,34904425 |  |
| 210384_at    | PRMT2           | -1,964176657 | -1,615132408 | -0,34904425 |  |
| 211319_at    | RAE1            | -1,964176657 | -1,615132408 | -0,34904425 |  |
| 215301_at    | SYCE1L          | -1,964176657 | -1,615132408 | -0,34904425 |  |
| 219436_s_at  | EMCN            | -1,964176657 | -1,615132408 | -0,34904425 |  |
| 220154_at    | DST             | -1,964176657 | -1,615132408 | -0,34904425 |  |
| 225801_at    | FBXO32          | -1,964176657 | -1,615132408 | -0,34904425 |  |
| 230022_at    | CLEC18A         | -1,964176657 | -1,615132408 | -0,34904425 |  |
| 233051_at    | SLITRK2         | -1,964176657 | -1,615132408 | -0,34904425 |  |
| 233400_at    | -               | -1,964176657 | -1,615132408 | -0,34904425 |  |
| 234228_at    | -               | -1,964176657 | -1,615132408 | -0,34904425 |  |
| 237017_s_at  | -               | -1,964176657 | -1,615132408 | -0,34904425 |  |
| 237749_at    | -               | -1,964176657 | -1,615132408 | -0,34904425 |  |
| 1553306_at   | CASP8           | -1,399512875 | -1,050406615 | -0,34910626 |  |
| 1553350_at   | FAM123C         | -1,399512875 | -1,050406615 | -0,34910626 |  |
| 203256_at    | CDH3            | -1,399512875 | -1,050406615 | -0,34910626 |  |
| 203716_s_at  | DPP4            | -1,399512875 | -1,050406615 | -0,34910626 |  |
| 207570_at    | SHOX            | -1,399512875 | -1,050406615 | -0,34910626 |  |
| 216501_at    | VAC14           | -1,399512875 | -1,050406615 | -0,34910626 |  |
| 222055_at    | FAHD2A /// FAHD | -1,399512875 | -1,050406615 | -0,34910626 |  |
| 222173_s_at  | TBC1D2          | -1,399512875 | -1,050406615 | -0,34910626 |  |
| 230294_at    | LOC100505490    | -1,399512875 | -1,050406615 | -0,34910626 |  |
| 230584_at    | LOC100287728 /  | -1,399512875 | -1,050406615 | -0,34910626 |  |
| 231329_at    | -               | -1,399512875 | -1,050406615 | -0,34910626 |  |
| 212658_at    | LHFPL2          | 3,411111015  | 3,760216412  | -0,34910626 |  |
| 1554023_s_at | CCDC13          | -0,055687482 | 0,293518836  | -0,34920632 |  |
| 207136_at    | ARR3            | -0,055687482 | 0,293518836  | -0,34920632 |  |
| 238560_at    | CALCOCO2        | -0,055687482 | 0,293518836  | -0,34920632 |  |
| 201642_at    | IFNGR2          | 3,276317033  | 3,625821706  | -0,34950467 |  |
| 241961_at    | TECRL           | -3,448416261 | -3,098858316 | -0,34955794 |  |
| 202124_s_at  | TRAK2           | 1,683039483  | 2,032717854  | -0,34967837 |  |
| 1552604_at   | LINC00308       | -2,311268652 | -1,961547147 | -0,3497215  |  |
| 1557099_at   | -               | -2,311268652 | -1,961547147 | -0,3497215  |  |
| 1557513_a_at | -               | -2,311268652 | -1,961547147 | -0,3497215  |  |
| 1557515_at   | -               | -2,311268652 | -1,961547147 | -0,3497215  |  |
| 205343_at    | SULT1C2         | -2,311268652 | -1,961547147 | -0,3497215  |  |
| 210895_s_at  | CD86            | -2,311268652 | -1,961547147 | -0,3497215  |  |
| 211193_at    | TP63            | -2,311268652 | -1,961547147 | -0,3497215  |  |
| 215064_at    | SC5DL           | -2,311268652 | -1,961547147 | -0,3497215  |  |
| 215598_at    | TTC12           | -2,311268652 | -1,961547147 | -0,3497215  |  |
| 224108_at    | -               | -2,311268652 | -1,961547147 | -0,3497215  |  |
| 227487_s_at  | SERPINE2        | -2,311268652 | -1,961547147 | -0,3497215  |  |
| 231048_at    | -               | -2,311268652 | -1,961547147 | -0,3497215  |  |
| 234839_at    | -               | -2,311268652 | -1,961547147 | -0,3497215  |  |
| 237081_at    | -               | -2,311268652 | -1,961547147 | -0,3497215  |  |
| 240428_at    | LOC285000       | -2,311268652 | -1,961547147 | -0,3497215  |  |
| 243122_at    | -               | -2,311268652 | -1,961547147 | -0,3497215  |  |
| 243686_at    | -               | -2,311268652 | -1,961547147 | -0,3497215  |  |
| 243789_at    | -               | -2,311268652 | -1,961547147 | -0,3497215  |  |

|              |                |              |              |             |  |
|--------------|----------------|--------------|--------------|-------------|--|
| 243795_s_at  | LOC440900      | -2,311268652 | -1,961547147 | -0,3497215  |  |
| 213082_s_at  | SLC35D2        | 0,715481152  | 1,065442793  | -0,34996164 |  |
| 1559822_s_at | MTDH           | 1,247462054  | 1,59747851   | -0,35001646 |  |
| 232755_at    | UBE2G2         | 1,247462054  | 1,59747851   | -0,35001646 |  |
| 207853_s_at  | SNCB           | -0,67289328  | -0,322870281 | -0,350023   |  |
| 221389_at    | PLA2G2E        | -0,67289328  | -0,322870281 | -0,350023   |  |
| 223169_s_at  | RHOU           | -0,67289328  | -0,322870281 | -0,350023   |  |
| 203079_s_at  | CUL2           | 3,188003814  | 3,538185672  | -0,35018186 |  |
| 203154_s_at  | PAK4           | 3,067171967  | 3,417357537  | -0,35018557 |  |
| 1555368_x_at | ZNF479         | -2,01371626  | -1,663414495 | -0,35030177 |  |
| 1563969_at   | FLJ33360       | -2,01371626  | -1,663414495 | -0,35030177 |  |
| 1567254_at   | OR10D1P        | -2,01371626  | -1,663414495 | -0,35030177 |  |
| 203562_at    | FEZ1           | -2,01371626  | -1,663414495 | -0,35030177 |  |
| 206002_at    | GPR64          | -2,01371626  | -1,663414495 | -0,35030177 |  |
| 206579_at    | ZNF192         | -2,01371626  | -1,663414495 | -0,35030177 |  |
| 223636_at    | ZMYND12        | -2,01371626  | -1,663414495 | -0,35030177 |  |
| 227671_at    | XIST           | -2,01371626  | -1,663414495 | -0,35030177 |  |
| 231484_at    | -              | -2,01371626  | -1,663414495 | -0,35030177 |  |
| 233371_at    | ABCC13         | -2,01371626  | -1,663414495 | -0,35030177 |  |
| 233406_at    | -              | -2,01371626  | -1,663414495 | -0,35030177 |  |
| 235343_at    | VASH2          | -2,01371626  | -1,663414495 | -0,35030177 |  |
| 238580_at    | -              | -2,01371626  | -1,663414495 | -0,35030177 |  |
| 239919_at    | TBX5-AS1       | -2,01371626  | -1,663414495 | -0,35030177 |  |
| 244566_at    | -              | -2,01371626  | -1,663414495 | -0,35030177 |  |
| 244637_at    | -              | -2,01371626  | -1,663414495 | -0,35030177 |  |
| 244794_at    | -              | -2,01371626  | -1,663414495 | -0,35030177 |  |
| 215048_at    | ZNF280B        | -0,221656139 | 0,128747141  | -0,35040328 |  |
| 228386_s_at  | DDX59          | -0,221656139 | 0,128747141  | -0,35040328 |  |
| 241568_at    | LOC100506319   | -0,221656139 | 0,128747141  | -0,35040328 |  |
| 208507_at    | OR7C2          | 0,083054335  | 0,433557298  | -0,35050296 |  |
| 221006_s_at  | SNX27          | 1,523472489  | 1,874012195  | -0,35053971 |  |
| 1553515_at   | MYEOV2         | -2,262747984 | -1,912089812 | -0,35065817 |  |
| 1555059_at   | -              | -2,262747984 | -1,912089812 | -0,35065817 |  |
| 1565339_at   | DNAH10         | -2,262747984 | -1,912089812 | -0,35065817 |  |
| 204110_at    | HNMT           | -2,262747984 | -1,912089812 | -0,35065817 |  |
| 206035_at    | REL            | -2,262747984 | -1,912089812 | -0,35065817 |  |
| 208500_x_at  | FOXD3          | -2,262747984 | -1,912089812 | -0,35065817 |  |
| 215250_at    | TMEM111        | -2,262747984 | -1,912089812 | -0,35065817 |  |
| 215987_at    | RAPGEF2        | -2,262747984 | -1,912089812 | -0,35065817 |  |
| 222247_at    | -              | -2,262747984 | -1,912089812 | -0,35065817 |  |
| 228780_at    | POU3F3         | -2,262747984 | -1,912089812 | -0,35065817 |  |
| 230674_at    | LGR4           | -2,262747984 | -1,912089812 | -0,35065817 |  |
| 231749_at    | TIMM13         | -2,262747984 | -1,912089812 | -0,35065817 |  |
| 232084_at    | SGTB           | -2,262747984 | -1,912089812 | -0,35065817 |  |
| 232912_at    | GPR180         | -2,262747984 | -1,912089812 | -0,35065817 |  |
| 235996_at    | RASSF8         | -2,262747984 | -1,912089812 | -0,35065817 |  |
| 237022_at    | -              | -2,262747984 | -1,912089812 | -0,35065817 |  |
| 237377_at    | -              | -2,262747984 | -1,912089812 | -0,35065817 |  |
| 239145_at    | ZNF414         | -2,262747984 | -1,912089812 | -0,35065817 |  |
| 242190_at    | -              | -2,262747984 | -1,912089812 | -0,35065817 |  |
| 242892_at    | -              | -2,262747984 | -1,912089812 | -0,35065817 |  |
| 238245_at    | ENPP7          | 0,181384709  | 0,532164371  | -0,35077966 |  |
| 211047_x_at  | AP2S1          | 5,402771752  | 5,753585187  | -0,35081343 |  |
| 214831_at    | ELK4           | 0,273439642  | 0,624460759  | -0,35102112 |  |
| 205197_s_at  | ATP7A          | 1,607231019  | 1,958277216  | -0,3510462  |  |
| 1555691_a_at | KLRC4-KLRK1 // | -0,741668563 | -0,39061235  | -0,35105621 |  |



|              |                 |              |              |             |  |
|--------------|-----------------|--------------|--------------|-------------|--|
| 203402_at    | KCNAB2          | -0,741668563 | -0,39061235  | -0,35105621 |  |
| 205839_s_at  | BZRAP1          | -0,741668563 | -0,39061235  | -0,35105621 |  |
| 215194_at    | PRKCA           | -0,741668563 | -0,39061235  | -0,35105621 |  |
| 233601_at    | -               | -0,741668563 | -0,39061235  | -0,35105621 |  |
| 236742_at    | -               | -0,741668563 | -0,39061235  | -0,35105621 |  |
| 238055_at    | LOC100505549    | -0,741668563 | -0,39061235  | -0,35105621 |  |
| 240256_at    | -               | -0,741668563 | -0,39061235  | -0,35105621 |  |
| 1553330_at   | C7orf45         | -2,972500237 | -2,621331989 | -0,35116825 |  |
| 1557583_at   | ST18            | -2,972500237 | -2,621331989 | -0,35116825 |  |
| 1558745_at   | SNX29           | -2,972500237 | -2,621331989 | -0,35116825 |  |
| 1558905_at   | -               | -2,972500237 | -2,621331989 | -0,35116825 |  |
| 1559310_at   | -               | -2,972500237 | -2,621331989 | -0,35116825 |  |
| 1559914_at   | -               | -2,972500237 | -2,621331989 | -0,35116825 |  |
| 1564371_a_at | CASC2           | -2,972500237 | -2,621331989 | -0,35116825 |  |
| 1569551_at   | -               | -2,972500237 | -2,621331989 | -0,35116825 |  |
| 203399_x_at  | PSG3            | -2,972500237 | -2,621331989 | -0,35116825 |  |
| 208566_at    | KCNJ12 /// KCNJ | -2,972500237 | -2,621331989 | -0,35116825 |  |
| 234588_at    | -               | -2,972500237 | -2,621331989 | -0,35116825 |  |
| 237660_at    | UNC80           | -2,972500237 | -2,621331989 | -0,35116825 |  |
| 240985_at    | -               | -2,972500237 | -2,621331989 | -0,35116825 |  |
| 241716_at    | HSPD1           | -2,972500237 | -2,621331989 | -0,35116825 |  |
| 242513_x_at  | KIAA2018        | -2,972500237 | -2,621331989 | -0,35116825 |  |
| 243938_x_at  | DNAH5           | -2,972500237 | -2,621331989 | -0,35116825 |  |
| 1557919_a_at | ERVH-3          | 2,652894659  | 3,004228687  | -0,35133403 |  |
| 1553232_at   | FAM82A1         | -2,089474779 | -1,738067356 | -0,35140742 |  |
| 1560752_at   | FBXW2           | -2,089474779 | -1,738067356 | -0,35140742 |  |
| 1561618_at   | -               | -2,089474779 | -1,738067356 | -0,35140742 |  |
| 1562794_at   | -               | -2,089474779 | -1,738067356 | -0,35140742 |  |
| 1564545_a_at | -               | -2,089474779 | -1,738067356 | -0,35140742 |  |
| 1566537_at   | -               | -2,089474779 | -1,738067356 | -0,35140742 |  |
| 1569699_at   | AK7             | -2,089474779 | -1,738067356 | -0,35140742 |  |
| 206602_s_at  | HOXD3           | -2,089474779 | -1,738067356 | -0,35140742 |  |
| 207872_s_at  | LILRA1          | -2,089474779 | -1,738067356 | -0,35140742 |  |
| 209459_s_at  | ABAT            | -2,089474779 | -1,738067356 | -0,35140742 |  |
| 216799_at    | -               | -2,089474779 | -1,738067356 | -0,35140742 |  |
| 217178_at    | RARG            | -2,089474779 | -1,738067356 | -0,35140742 |  |
| 219139_s_at  | CROCCP3         | -2,089474779 | -1,738067356 | -0,35140742 |  |
| 222100_at    | CYP2E1          | -2,089474779 | -1,738067356 | -0,35140742 |  |
| 234542_at    | ARHGEF12        | -2,089474779 | -1,738067356 | -0,35140742 |  |
| 236157_at    | RBM14 /// RBM4  | -2,089474779 | -1,738067356 | -0,35140742 |  |
| 236465_at    | RNF175          | -2,089474779 | -1,738067356 | -0,35140742 |  |
| 237143_at    | -               | -2,089474779 | -1,738067356 | -0,35140742 |  |
| 237238_at    | WWC1            | -2,089474779 | -1,738067356 | -0,35140742 |  |
| 210695_s_at  | WWOX            | 1,129248302  | 1,480766833  | -0,35151853 |  |
| 1553002_at   | DEFB105A /// DE | -2,138804305 | -1,787089803 | -0,35171145 |  |
| 1558202_at   | LOC145783       | -2,138804305 | -1,787089803 | -0,35171145 |  |
| 1569139_s_at | FAM53A          | -2,138804305 | -1,787089803 | -0,35171145 |  |
| 204654_s_at  | TFAP2A          | -2,138804305 | -1,787089803 | -0,35171145 |  |
| 206087_x_at  | HFE             | -2,138804305 | -1,787089803 | -0,35171145 |  |
| 209863_s_at  | TP63            | -2,138804305 | -1,787089803 | -0,35171145 |  |
| 215097_at    | CAPZB           | -2,138804305 | -1,787089803 | -0,35171145 |  |
| 215639_at    | SH2D3C          | -2,138804305 | -1,787089803 | -0,35171145 |  |
| 217441_at    | USP33           | -2,138804305 | -1,787089803 | -0,35171145 |  |
| 218963_s_at  | KRT23           | -2,138804305 | -1,787089803 | -0,35171145 |  |
| 223695_s_at  | ARSD            | -2,138804305 | -1,787089803 | -0,35171145 |  |
| 223935_at    | TRPM5           | -2,138804305 | -1,787089803 | -0,35171145 |  |

|              |                |              |              |             |  |
|--------------|----------------|--------------|--------------|-------------|--|
| 224392_s_at  | OPN3           | -2,138804305 | -1,787089803 | -0,3517145  |  |
| 227758_at    | RERG           | -2,138804305 | -1,787089803 | -0,3517145  |  |
| 230581_at    | -              | -2,138804305 | -1,787089803 | -0,3517145  |  |
| 233424_at    | -              | -2,138804305 | -1,787089803 | -0,3517145  |  |
| 239104_at    | MGC42157       | -2,138804305 | -1,787089803 | -0,3517145  |  |
| 240232_at    | -              | -2,138804305 | -1,787089803 | -0,3517145  |  |
| 222588_s_at  | C11orf57       | 2,485917452  | 2,837730973  | -0,35181352 |  |
| 1555784_s_at | IRAK1          | 0,384950573  | 0,73688026   | -0,35192969 |  |
| 215907_at    | -              | 0,384950573  | 0,73688026   | -0,35192969 |  |
| 238781_at    | SREK1          | 0,384950573  | 0,73688026   | -0,35192969 |  |
| 48825_at     | ING4           | 0,695652136  | 1,047601544  | -0,35194941 |  |
| 205608_s_at  | ANGPT1         | 3,366867184  | 3,718943256  | -0,35207607 |  |
| 1554992_at   | RASGRF1        | -0,512251684 | -0,160136748 | -0,35211494 |  |
| 205976_at    | FASTKD2        | -0,512251684 | -0,160136748 | -0,35211494 |  |
| 216398_at    | GYPB           | -0,512251684 | -0,160136748 | -0,35211494 |  |
| 232142_at    | ISY1           | -0,512251684 | -0,160136748 | -0,35211494 |  |
| 224653_at    | EIF4EBP2       | 3,888182512  | 4,24031851   | -0,352136   |  |
| 211126_s_at  | CSRP2          | 0,541261317  | 0,893473268  | -0,35221195 |  |
| 230382_at    | SLC11A1        | 0,541261317  | 0,893473268  | -0,35221195 |  |
| 213134_x_at  | BTG3           | 3,904829675  | 4,257050293  | -0,35222062 |  |
| 1559311_at   | FLJ40292       | -0,888496123 | -0,536087151 | -0,35240897 |  |
| 208514_at    | KCNE1          | -0,888496123 | -0,536087151 | -0,35240897 |  |
| 229300_at    | RAB3C          | -0,888496123 | -0,536087151 | -0,35240897 |  |
| 232389_at    | WIPF3          | -0,888496123 | -0,536087151 | -0,35240897 |  |
| 236490_at    | NEDD4L         | -0,888496123 | -0,536087151 | -0,35240897 |  |
| 219526_at    | C14orf169      | 3,537166687  | 3,889604025  | -0,35243734 |  |
| 203117_s_at  | PAN2           | 1,296557217  | 1,64909809   | -0,35254087 |  |
| 232174_at    | -              | 1,296557217  | 1,64909809   | -0,35254087 |  |
| 227768_at    | ZNF407         | 2,05655332   | 2,409170778  | -0,35261746 |  |
| 216958_s_at  | IVD            | 1,789769151  | 2,14244844   | -0,35267929 |  |
| 201389_at    | ITGA5          | 0,87091093   | 1,223626587  | -0,35271566 |  |
| 217631_at    | GTPBP4         | 0,87091093   | 1,223626587  | -0,35271566 |  |
| 201778_s_at  | KIAA0494       | 3,584658878  | 3,937445604  | -0,35278673 |  |
| 213272_s_at  | TMEM159        | 0,928678725  | 1,281471383  | -0,35279266 |  |
| 214334_x_at  | DAZAP2         | 4,942904414  | 5,295953565  | -0,35304915 |  |
| 219681_s_at  | RAB11FIP1      | 0,351548291  | 0,704715219  | -0,35316693 |  |
| 210845_s_at  | PLAUR          | 1,406361373  | 1,759685182  | -0,35332381 |  |
| 222429_at    | DBNL           | 1,153678675  | 1,507116528  | -0,35343785 |  |
| 1565661_x_at | FUT6           | -0,00073712  | 0,352836757  | -0,35357388 |  |
| 213181_s_at  | MOCS1          | -0,00073712  | 0,352836757  | -0,35357388 |  |
| 221746_at    | UBL4A          | 2,497416546  | 2,851017268  | -0,35360072 |  |
| 1554206_at   | TMLHE          | 0,103263601  | 0,456918297  | -0,3536547  |  |
| 202366_at    | ACADS          | 0,103263601  | 0,456918297  | -0,3536547  |  |
| 1564117_at   | HMCN2 /// LOC1 | 0,20027154   | 0,553993624  | -0,35372208 |  |
| 1556249_a_at | FLJ33065       | -0,57445847  | -0,220592223 | -0,35386625 |  |
| 1563632_at   | TMEM72-AS1     | -0,57445847  | -0,220592223 | -0,35386625 |  |
| 217088_s_at  | NCR1           | -0,57445847  | -0,220592223 | -0,35386625 |  |
| 221197_s_at  | CHAT           | -0,57445847  | -0,220592223 | -0,35386625 |  |
| 234938_at    | BACH1          | -0,57445847  | -0,220592223 | -0,35386625 |  |
| 240630_at    | -              | -0,57445847  | -0,220592223 | -0,35386625 |  |
| 241360_at    | CCDC15         | -0,57445847  | -0,220592223 | -0,35386625 |  |
| 205008_s_at  | CIB2           | -0,325749314 | 0,028364014  | -0,35411333 |  |
| 216182_at    | SYNJ2          | -0,325749314 | 0,028364014  | -0,35411333 |  |
| 232206_at    | ULK4           | -0,325749314 | 0,028364014  | -0,35411333 |  |
| 238544_at    | -              | -0,325749314 | 0,028364014  | -0,35411333 |  |
| 244429_at    | -              | -0,325749314 | 0,028364014  | -0,35411333 |  |

|              |                 |              |              |             |  |
|--------------|-----------------|--------------|--------------|-------------|--|
| 244877_at    | GPR173          | -0,325749314 | 0,028364014  | -0,35411333 |  |
| 224895_at    | YAP1            | -0,196756757 | 0,157549243  | -0,354306   |  |
| 235674_at    | -               | -0,196756757 | 0,157549243  | -0,354306   |  |
| 209453_at    | SLC9A1          | 1,883312263  | 2,237691445  | -0,35437918 |  |
| 237494_at    | -               | 0,480753764  | 0,835239052  | -0,35448529 |  |
| 243834_at    | TNRC6A          | 0,480753764  | 0,835239052  | -0,35448529 |  |
| 210710_at    | AGGF1           | 0,822971223  | 1,177496821  | -0,3545256  |  |
| 236611_at    | LOC100506676    | 0,822971223  | 1,177496821  | -0,3545256  |  |
| 1556348_at   | HEATR1          | -1,173767127 | -0,819238336 | -0,35452879 |  |
| 1557131_at   | LOC254100       | -1,173767127 | -0,819238336 | -0,35452879 |  |
| 1561393_at   | -               | -1,173767127 | -0,819238336 | -0,35452879 |  |
| 202896_s_at  | SIRPA           | -1,173767127 | -0,819238336 | -0,35452879 |  |
| 206623_at    | PDE6A           | -1,173767127 | -0,819238336 | -0,35452879 |  |
| 208555_x_at  | CST2            | -1,173767127 | -0,819238336 | -0,35452879 |  |
| 217032_at    | FOXD4 /// FOXD  | -1,173767127 | -0,819238336 | -0,35452879 |  |
| 227915_at    | ASB2            | -1,173767127 | -0,819238336 | -0,35452879 |  |
| 229709_at    | ATP1B3          | -1,173767127 | -0,819238336 | -0,35452879 |  |
| 231150_at    | -               | -1,173767127 | -0,819238336 | -0,35452879 |  |
| 234442_at    | -               | -1,173767127 | -0,819238336 | -0,35452879 |  |
| 234763_at    | -               | -1,173767127 | -0,819238336 | -0,35452879 |  |
| 236190_at    | -               | -1,173767127 | -0,819238336 | -0,35452879 |  |
| 244807_at    | C17orf76-AS1    | -1,173767127 | -0,819238336 | -0,35452879 |  |
| 217778_at    | SLC39A1         | 1,331241794  | 1,685812099  | -0,35457031 |  |
| 1559436_x_at | -               | 2,064305961  | 2,419116683  | -0,35481072 |  |
| 218650_at    | DGCR8 /// MIR13 | 1,063722698  | 1,418668082  | -0,35494538 |  |
| 1557651_x_at | GALE            | 0,57782909   | 0,932882274  | -0,35505318 |  |
| 212617_at    | ZNF609          | 0,57782909   | 0,932882274  | -0,35505318 |  |
| 225235_at    | TSPAN17         | 2,342392905  | 2,697670403  | -0,3552775  |  |
| 221806_s_at  | SETD5           | 2,675004741  | 3,030417996  | -0,35541325 |  |
| 1552957_at   | DNAH6           | -2,930741289 | -2,575129729 | -0,35561156 |  |
| 1570396_at   | FAM66C          | -2,930741289 | -2,575129729 | -0,35561156 |  |
| 221796_at    | NTRK2           | -2,930741289 | -2,575129729 | -0,35561156 |  |
| 231766_s_at  | COL12A1         | -2,930741289 | -2,575129729 | -0,35561156 |  |
| 234569_at    | -               | -2,930741289 | -2,575129729 | -0,35561156 |  |
| 238284_at    | LOC100506154    | -2,930741289 | -2,575129729 | -0,35561156 |  |
| 241607_at    | LOC730102       | -2,930741289 | -2,575129729 | -0,35561156 |  |
| 208710_s_at  | AP3D1           | 4,469312262  | 4,8249493    | -0,35563704 |  |
| 211973_at    | -               | 1,143956113  | 1,499637023  | -0,35568091 |  |
| 1553660_at   | HUS1B           | -1,688127507 | -1,332017329 | -0,35611018 |  |
| 1556545_at   | -               | -1,688127507 | -1,332017329 | -0,35611018 |  |
| 1556638_at   | PAX7            | -1,688127507 | -1,332017329 | -0,35611018 |  |
| 1561263_at   | C1QTNF3         | -1,688127507 | -1,332017329 | -0,35611018 |  |
| 203290_at    | HLA-DQA1        | -1,688127507 | -1,332017329 | -0,35611018 |  |
| 203372_s_at  | SOCS2           | -1,688127507 | -1,332017329 | -0,35611018 |  |
| 205478_at    | PPP1R1A         | -1,688127507 | -1,332017329 | -0,35611018 |  |
| 206078_at    | KALRN           | -1,688127507 | -1,332017329 | -0,35611018 |  |
| 208334_at    | NDST4           | -1,688127507 | -1,332017329 | -0,35611018 |  |
| 208894_at    | HLA-DRA         | -1,688127507 | -1,332017329 | -0,35611018 |  |
| 211388_s_at  | -               | -1,688127507 | -1,332017329 | -0,35611018 |  |
| 216454_at    | TRMT1           | -1,688127507 | -1,332017329 | -0,35611018 |  |
| 222880_at    | AKT3            | -1,688127507 | -1,332017329 | -0,35611018 |  |
| 235935_at    | LRRC73          | -1,688127507 | -1,332017329 | -0,35611018 |  |
| 243679_at    | JPH3            | -1,688127507 | -1,332017329 | -0,35611018 |  |
| 204098_at    | RBMX2           | 1,923647937  | 2,27978304   | -0,3561351  |  |
| 213916_at    | ZNF20 /// ZNF62 | 3,121439986  | 3,477609204  | -0,35616922 |  |
| 210950_s_at  | FDFT1           | 4,975475611  | 5,331671114  | -0,3561955  |  |

|              |                 |              |              |             |  |
|--------------|-----------------|--------------|--------------|-------------|--|
| 230528_s_at  | LOC100287195 /  | 2,31665944   | 2,672945617  | -0,35628618 |  |
| 210972_x_at  | TRAC /// TRAJ17 | 1,523472489  | 1,879785595  | -0,35631311 |  |
| 227651_at    | NACC1           | 2,553576109  | 2,910041809  | -0,3564657  |  |
| 222388_s_at  | VPS35           | 4,236401075  | 4,592909513  | -0,35650844 |  |
| 1552876_at   | LINC00334       | -2,64318869  | -2,286583451 | -0,35660524 |  |
| 1561287_at   | LINC00561       | -2,64318869  | -2,286583451 | -0,35660524 |  |
| 1564262_at   | -               | -2,64318869  | -2,286583451 | -0,35660524 |  |
| 1566243_at   | -               | -2,64318869  | -2,286583451 | -0,35660524 |  |
| 1566833_x_at | TOP1P2          | -2,64318869  | -2,286583451 | -0,35660524 |  |
| 208305_at    | PGR             | -2,64318869  | -2,286583451 | -0,35660524 |  |
| 216065_at    | -               | -2,64318869  | -2,286583451 | -0,35660524 |  |
| 220517_at    | VPS13C          | -2,64318869  | -2,286583451 | -0,35660524 |  |
| 230943_at    | SOX17           | -2,64318869  | -2,286583451 | -0,35660524 |  |
| 231364_at    | -               | -2,64318869  | -2,286583451 | -0,35660524 |  |
| 231754_at    | PCDHGC4         | -2,64318869  | -2,286583451 | -0,35660524 |  |
| 232306_at    | CDH26           | -2,64318869  | -2,286583451 | -0,35660524 |  |
| 237628_at    | -               | -2,64318869  | -2,286583451 | -0,35660524 |  |
| 237784_at    | SUB1            | -2,64318869  | -2,286583451 | -0,35660524 |  |
| 239258_at    | -               | -2,64318869  | -2,286583451 | -0,35660524 |  |
| 241218_at    | LOC100506387    | -2,64318869  | -2,286583451 | -0,35660524 |  |
| 244706_at    | PCMTD1          | -2,64318869  | -2,286583451 | -0,35660524 |  |
| 1560292_a_at | TMCO4           | 0,123193849  | 0,479907041  | -0,35671319 |  |
| 227019_at    | C1orf226        | 0,123193849  | 0,479907041  | -0,35671319 |  |
| 228174_at    | SCAI            | 1,187200746  | 1,543943227  | -0,35674248 |  |
| 223552_at    | LRRC4           | 0,020670649  | 0,377530647  | -0,35686    |  |
| 237310_at    | -               | 0,020670649  | 0,377530647  | -0,35686    |  |
| 1562442_a_at | MIR5096 /// SSB | -0,089689931 | 0,26733076   | -0,35702069 |  |
| 1553775_at   | FLJ31715        | -0,706943342 | -0,34958478  | -0,35735856 |  |
| 205082_s_at  | AOX1            | -0,706943342 | -0,34958478  | -0,35735856 |  |
| 215189_at    | KRT86 /// LOC10 | -0,706943342 | -0,34958478  | -0,35735856 |  |
| 215353_at    | -               | -0,706943342 | -0,34958478  | -0,35735856 |  |
| 237019_at    | -               | -0,706943342 | -0,34958478  | -0,35735856 |  |
| 202607_at    | NDST1           | 1,000476627  | 1,3579181    | -0,35744147 |  |
| 1559622_at   | -               | -1,308181863 | -0,950686014 | -0,35749585 |  |
| 1559676_a_at | -               | -1,308181863 | -0,950686014 | -0,35749585 |  |
| 1560275_at   | TMEM44          | -1,308181863 | -0,950686014 | -0,35749585 |  |
| 1566555_at   | FLJ90757        | -1,308181863 | -0,950686014 | -0,35749585 |  |
| 211204_at    | ME1             | -1,308181863 | -0,950686014 | -0,35749585 |  |
| 220069_at    | TUBA8           | -1,308181863 | -0,950686014 | -0,35749585 |  |
| 221308_at    | FRS2            | -1,308181863 | -0,950686014 | -0,35749585 |  |
| 228036_s_at  | FBXO2           | -1,308181863 | -0,950686014 | -0,35749585 |  |
| 244556_at    | LCP2            | -1,308181863 | -0,950686014 | -0,35749585 |  |
| 225031_at    | CHD6            | 1,493160564  | 1,85068474   | -0,35752418 |  |
| 219221_at    | ZBTB38          | 1,318332599  | 1,675891488  | -0,35755889 |  |
| 1557576_at   | PAQR3           | -1,470833215 | -1,112851844 | -0,35798137 |  |
| 1557797_a_at | -               | -1,470833215 | -1,112851844 | -0,35798137 |  |
| 1558120_at   | DDX3X           | -1,470833215 | -1,112851844 | -0,35798137 |  |
| 1558780_a_at | H2AFY           | -1,470833215 | -1,112851844 | -0,35798137 |  |
| 1558889_at   | -               | -1,470833215 | -1,112851844 | -0,35798137 |  |
| 1559618_at   | LOC100129447    | -1,470833215 | -1,112851844 | -0,35798137 |  |
| 1560119_at   | LOC389634       | -1,470833215 | -1,112851844 | -0,35798137 |  |
| 204612_at    | PKIA            | -1,470833215 | -1,112851844 | -0,35798137 |  |
| 206125_s_at  | KLK8            | -1,470833215 | -1,112851844 | -0,35798137 |  |
| 208254_at    | -               | -1,470833215 | -1,112851844 | -0,35798137 |  |
| 210441_at    | CDC14A          | -1,470833215 | -1,112851844 | -0,35798137 |  |
| 221730_at    | COL5A2          | -1,470833215 | -1,112851844 | -0,35798137 |  |

|             |              |              |              |             |  |
|-------------|--------------|--------------|--------------|-------------|--|
| 222092_at   | PTPN21       | -1,470833215 | -1,112851844 | -0,35798137 |  |
| 229134_at   | VANGL1       | -1,470833215 | -1,112851844 | -0,35798137 |  |
| 236429_at   | ZNF83        | -1,470833215 | -1,112851844 | -0,35798137 |  |
| 240215_at   | -            | -1,470833215 | -1,112851844 | -0,35798137 |  |
| 242026_at   | MYCN         | -1,470833215 | -1,112851844 | -0,35798137 |  |
| 244681_at   | NUP210P1     | -1,470833215 | -1,112851844 | -0,35798137 |  |
| 203009_at   | BCAM         | -0,43775896  | -0,079522948 | -0,35823601 |  |
| 235069_at   | TATDN3       | -0,43775896  | -0,079522948 | -0,35823601 |  |
| 239496_at   | -            | -0,43775896  | -0,079522948 | -0,35823601 |  |
| 239947_at   | -            | -0,43775896  | -0,079522948 | -0,35823601 |  |
| 1559437_at  | -            | -1,089016378 | -0,730778808 | -0,35823757 |  |
| 1563274_at  | -            | -1,089016378 | -0,730778808 | -0,35823757 |  |
| 1569452_at  | LOC692247    | -1,089016378 | -0,730778808 | -0,35823757 |  |
| 205834_s_at | PART1        | -1,089016378 | -0,730778808 | -0,35823757 |  |
| 229082_at   | CCDC125      | -1,089016378 | -0,730778808 | -0,35823757 |  |
| 231163_at   | C1orf111     | -1,089016378 | -0,730778808 | -0,35823757 |  |
| 231321_s_at | ACER3        | -1,089016378 | -0,730778808 | -0,35823757 |  |
| 235741_at   | PPIA         | -1,089016378 | -0,730778808 | -0,35823757 |  |
| 241407_at   | -            | -1,089016378 | -0,730778808 | -0,35823757 |  |
| 214961_at   | MTUS2        | -0,299034815 | 0,059218869  | -0,35825368 |  |
| 236380_at   | -            | -0,299034815 | 0,059218869  | -0,35825368 |  |
| 240538_at   | -            | 1,795990708  | 2,154405725  | -0,35841502 |  |
| 211042_x_at | MCAM         | 3,082523011  | 3,440980183  | -0,35845717 |  |
| 226062_x_at | FAM63A       | 2,621710292  | 2,980244813  | -0,35853452 |  |
| 204357_s_at | LIMK1        | -0,022466681 | 0,336136178  | -0,35860286 |  |
| 228786_at   | LOC387647    | 1,369290453  | 1,728030156  | -0,3587397  |  |
| 208179_x_at | KIR2DL3      | -0,136301282 | 0,222599095  | -0,35890038 |  |
| 211004_s_at | ALDH3B1      | -0,136301282 | 0,222599095  | -0,35890038 |  |
| 224627_at   | GBA2         | 1,177702228  | 1,536652708  | -0,35895048 |  |
| 202067_s_at | LDLR         | 2,185368281  | 2,544354523  | -0,35898624 |  |
| 204442_x_at | LTBP4        | 0,95671774   | 1,315948728  | -0,35923099 |  |
| 1553974_at  | C22orf39     | 0,900083947  | 1,259496994  | -0,35941305 |  |
| 203782_s_at | POLRMT       | 2,069451339  | 2,428994491  | -0,35954315 |  |
| 219280_at   | BRWD1        | 0,841135803  | 1,200746069  | -0,35961027 |  |
| 219757_s_at | C14orf101    | 0,841135803  | 1,200746069  | -0,35961027 |  |
| 228411_at   | PARD3B       | 0,695652136  | 1,055274826  | -0,35962269 |  |
| 221758_at   | ARMC6        | 2,017152618  | 2,376875125  | -0,35972251 |  |
| 235912_at   | -            | 0,627515113  | 0,987376598  | -0,35986148 |  |
| 217085_at   | -            | -3,250025915 | -2,89013181  | -0,3598941  |  |
| 234692_at   | -            | -3,250025915 | -2,89013181  | -0,3598941  |  |
| 237825_x_at | -            | -3,250025915 | -2,89013181  | -0,3598941  |  |
| 238257_at   | -            | -3,250025915 | -2,89013181  | -0,3598941  |  |
| 1555870_at  | RNF207       | -0,85085127  | -0,490927335 | -0,35992393 |  |
| 204188_s_at | RARG         | -0,85085127  | -0,490927335 | -0,35992393 |  |
| 206625_at   | PRPH2        | -0,85085127  | -0,490927335 | -0,35992393 |  |
| 215398_at   | -            | -0,85085127  | -0,490927335 | -0,35992393 |  |
| 223510_at   | NRP2         | -0,85085127  | -0,490927335 | -0,35992393 |  |
| 227342_s_at | MYEOV        | -0,85085127  | -0,490927335 | -0,35992393 |  |
| 233763_at   | LYRM2        | -0,85085127  | -0,490927335 | -0,35992393 |  |
| 1554805_at  | CLDN19       | -0,926850548 | -0,566887459 | -0,35996309 |  |
| 1557311_at  | LOC100131354 | -0,926850548 | -0,566887459 | -0,35996309 |  |
| 1566931_at  | TFB2M        | -0,926850548 | -0,566887459 | -0,35996309 |  |
| 219610_at   | RGNEF        | -0,926850548 | -0,566887459 | -0,35996309 |  |
| 219942_at   | MYL7         | -0,926850548 | -0,566887459 | -0,35996309 |  |
| 220555_s_at | PDZD7        | -0,926850548 | -0,566887459 | -0,35996309 |  |
| 222152_at   | PDCD6        | 0,376672223  | 0,73688026   | -0,36020804 |  |

|              |                |              |              |             |  |
|--------------|----------------|--------------|--------------|-------------|--|
| 229139_at    | JPH1           | 0,376672223  | 0,73688026   | -0,36020804 |  |
| 1553258_at   | FLJ30679       | -0,496991414 | -0,136643983 | -0,36034743 |  |
| 208354_s_at  | SLC12A3        | -0,496991414 | -0,136643983 | -0,36034743 |  |
| 213819_s_at  | FLOT1          | -0,496991414 | -0,136643983 | -0,36034743 |  |
| 219018_s_at  | CCDC85C        | -0,496991414 | -0,136643983 | -0,36034743 |  |
| 219404_at    | EPS8L3         | -0,496991414 | -0,136643983 | -0,36034743 |  |
| 230013_s_at  | ARHGAP23       | -0,496991414 | -0,136643983 | -0,36034743 |  |
| 235849_at    | SCARA5         | -0,496991414 | -0,136643983 | -0,36034743 |  |
| 236411_at    | -              | -0,496991414 | -0,136643983 | -0,36034743 |  |
| 243669_s_at  | PRAP1          | -0,496991414 | -0,136643983 | -0,36034743 |  |
| 1554911_at   | ABCC11         | -0,352951799 | 0,007421914  | -0,36037371 |  |
| 206339_at    | CARTPT         | -0,352951799 | 0,007421914  | -0,36037371 |  |
| 212727_at    | DLG3           | -0,352951799 | 0,007421914  | -0,36037371 |  |
| 241006_at    | -              | -0,352951799 | 0,007421914  | -0,36037371 |  |
| 243098_at    | -              | -0,352951799 | 0,007421914  | -0,36037371 |  |
| 1555883_s_at | SPIN3          | 1,62481334   | 1,98530622   | -0,36049288 |  |
| 212197_x_at  | MPRIIP         | 2,691784869  | 3,052311115  | -0,36052625 |  |
| 239991_at    | -              | 1,201332287  | 1,562009954  | -0,36067767 |  |
| 1568845_at   | -              | 0,072842263  | 0,433557298  | -0,36071504 |  |
| 207449_s_at  | POFUT2         | 0,072842263  | 0,433557298  | -0,36071504 |  |
| 212618_at    | ZNF609         | 0,072842263  | 0,433557298  | -0,36071504 |  |
| 232978_at    | -              | 1,414471577  | 1,775255987  | -0,36078441 |  |
| 202662_s_at  | ITPR2          | 0,503742507  | 0,864649967  | -0,36090746 |  |
| 226512_at    | ZMYM2          | 1,373456798  | 1,73441697   | -0,36096017 |  |
| 232662_x_at  | FAM213A        | 1,774096855  | 2,135226207  | -0,36112935 |  |
| 1559593_a_at | MED26          | 0,853119696  | 1,214517879  | -0,36139818 |  |
| 212069_s_at  | PRRC2B         | 0,853119696  | 1,214517879  | -0,36139818 |  |
| 241681_at    | -              | 2,001086023  | 2,362515214  | -0,36142919 |  |
| 203547_at    | CD4            | 0,228146222  | 0,589657387  | -0,36151117 |  |
| 210605_s_at  | MFGE8          | 3,18563636   | 3,547283438  | -0,36164708 |  |
| 1558678_s_at | LOC100507645 / | 3,755604375  | 4,117425547  | -0,36182117 |  |
| 227898_s_at  | ZFP41          | 1,314003737  | 1,675891488  | -0,36188775 |  |
| 1563473_at   | -              | 0,133056859  | 0,495031851  | -0,36197499 |  |
| 223967_at    | ANGPTL6        | 4,138815532  | 4,500847519  | -0,36203199 |  |
| 1554452_a_at | HILPDA         | 2,600539826  | 2,962671751  | -0,36213193 |  |
| 202135_s_at  | ACTR1B         | 1,381753566  | 1,743944487  | -0,36219092 |  |
| 1569303_s_at | RGS20          | 1,434549838  | 1,796776588  | -0,36222675 |  |
| 214730_s_at  | GLG1           | 2,466546243  | 2,828804976  | -0,36225873 |  |
| 234643_x_at  | -              | 1,868628927  | 2,230931691  | -0,36230276 |  |
| 217939_s_at  | AFTPH          | 2,540666392  | 2,902971658  | -0,36230527 |  |
| 206031_s_at  | USP5           | 1,163336153  | 1,525647381  | -0,36231123 |  |
| 217107_at    | -              | -0,112808516 | 0,249604176  | -0,36241269 |  |
| 219088_s_at  | ZNF576         | 0,82905153   | 1,191491281  | -0,36243975 |  |
| 206792_x_at  | PDE4C          | 2,901063789  | 3,263564154  | -0,36250036 |  |
| 1565672_at   | -              | 0,03125738   | 0,393761504  | -0,36250412 |  |
| 1554722_at   | TRPM3          | -2,866296344 | -2,503677622 | -0,36261872 |  |
| 1555265_at   | ABCC13         | -2,866296344 | -2,503677622 | -0,36261872 |  |
| 1561512_at   | -              | -2,866296344 | -2,503677622 | -0,36261872 |  |
| 1564368_a_at | -              | -2,866296344 | -2,503677622 | -0,36261872 |  |
| 1570408_at   | -              | -2,866296344 | -2,503677622 | -0,36261872 |  |
| 205121_at    | SGCB           | -2,866296344 | -2,503677622 | -0,36261872 |  |
| 207474_at    | SNRK           | -2,866296344 | -2,503677622 | -0,36261872 |  |
| 207496_at    | MS4A2          | -2,866296344 | -2,503677622 | -0,36261872 |  |
| 207820_at    | ADH1A          | -2,866296344 | -2,503677622 | -0,36261872 |  |
| 211310_at    | EZH1           | -2,866296344 | -2,503677622 | -0,36261872 |  |
| 215539_at    | -              | -2,866296344 | -2,503677622 | -0,36261872 |  |

|              |                 |              |              |             |  |
|--------------|-----------------|--------------|--------------|-------------|--|
| 216510_x_at  | IGHA1 /// IGHG1 | -2,866296344 | -2,503677622 | -0,36261872 |  |
| 217145_at    | IGK@ /// IGKC   | -2,866296344 | -2,503677622 | -0,36261872 |  |
| 224322_at    | ARID4B          | -2,866296344 | -2,503677622 | -0,36261872 |  |
| 241998_at    | C2orf80         | -2,866296344 | -2,503677622 | -0,36261872 |  |
| 243008_at    | RHEB            | -2,866296344 | -2,503677622 | -0,36261872 |  |
| 243613_at    | DENND5B         | -2,866296344 | -2,503677622 | -0,36261872 |  |
| 203825_at    | BRD3            | 2,35929703   | 2,721978587  | -0,36268156 |  |
| 211979_at    | GPR107          | 0,767063567  | 1,129843209  | -0,36277964 |  |
| 217427_s_at  | HIRA            | 3,109000457  | 3,471887144  | -0,36288669 |  |
| 210514_x_at  | HLA-G           | 2,596981013  | 2,959949103  | -0,36296809 |  |
| 207310_s_at  | NOS1            | -0,234278768 | 0,128747141  | -0,36302591 |  |
| 216943_at    | -               | -0,234278768 | 0,128747141  | -0,36302591 |  |
| 242148_at    | BCL6B           | -0,234278768 | 0,128747141  | -0,36302591 |  |
| 244304_at    | DIS3L2          | -0,234278768 | 0,128747141  | -0,36302591 |  |
| 209865_at    | SLC35A3         | 0,30867765   | 0,67181667   | -0,36313902 |  |
| 214157_at    | GNAS            | 0,30867765   | 0,67181667   | -0,36313902 |  |
| 229988_at    | -               | 0,30867765   | 0,67181667   | -0,36313902 |  |
| 215147_at    | -               | 0,613492853  | 0,976641161  | -0,36314831 |  |
| 221772_s_at  | PPP2R2D         | 1,530951994  | 1,894118818  | -0,36316682 |  |
| 238039_at    | LOC728769       | 1,530951994  | 1,894118818  | -0,36316682 |  |
| 1555227_a_at | MANEA           | -1,518072576 | -1,154897679 | -0,3631749  |  |
| 1556568_a_at | -               | -1,518072576 | -1,154897679 | -0,3631749  |  |
| 1556694_a_at | -               | -1,518072576 | -1,154897679 | -0,3631749  |  |
| 1558565_at   | AKNA            | -1,518072576 | -1,154897679 | -0,3631749  |  |
| 1560563_at   | -               | -1,518072576 | -1,154897679 | -0,3631749  |  |
| 1561058_at   | -               | -1,518072576 | -1,154897679 | -0,3631749  |  |
| 206934_at    | SIRPB1          | -1,518072576 | -1,154897679 | -0,3631749  |  |
| 208187_s_at  | -               | -1,518072576 | -1,154897679 | -0,3631749  |  |
| 208209_s_at  | C4BPB           | -1,518072576 | -1,154897679 | -0,3631749  |  |
| 216928_at    | TAL1            | -1,518072576 | -1,154897679 | -0,3631749  |  |
| 220437_at    | C19orf80        | -1,518072576 | -1,154897679 | -0,3631749  |  |
| 221106_at    | SLC22A17        | -1,518072576 | -1,154897679 | -0,3631749  |  |
| 228448_at    | MAP6            | -1,518072576 | -1,154897679 | -0,3631749  |  |
| 237335_at    | ZP1             | -1,518072576 | -1,154897679 | -0,3631749  |  |
| 241489_at    | -               | -1,518072576 | -1,154897679 | -0,3631749  |  |
| 1552511_a_at | CPA6            | -3,054236653 | -2,690860744 | -0,36337591 |  |
| 1557080_s_at | ITGBL1          | -3,054236653 | -2,690860744 | -0,36337591 |  |
| 1562190_at   | -               | -3,054236653 | -2,690860744 | -0,36337591 |  |
| 1566892_at   | -               | -3,054236653 | -2,690860744 | -0,36337591 |  |
| 220269_at    | ZBBX            | -3,054236653 | -2,690860744 | -0,36337591 |  |
| 232691_at    | SFXN5           | -3,054236653 | -2,690860744 | -0,36337591 |  |
| 237978_at    | -               | -3,054236653 | -2,690860744 | -0,36337591 |  |
| 241130_at    | -               | -3,054236653 | -2,690860744 | -0,36337591 |  |
| 243289_at    | -               | -3,054236653 | -2,690860744 | -0,36337591 |  |
| 240247_at    | -               | 1,442503549  | 1,805902329  | -0,36339878 |  |
| 230187_s_at  | LOC100507100    | 1,027166904  | 1,390636111  | -0,36346921 |  |
| 227146_at    | QSOX2           | 2,553576109  | 2,917077481  | -0,36350137 |  |
| 219457_s_at  | RIN3            | 0,541261317  | 0,904843258  | -0,36358194 |  |
| 209381_x_at  | SF3A2           | 2,084778276  | 2,448549499  | -0,36377122 |  |
| 235931_at    | LOC100506290 /  | 0,97328325   | 1,337086025  | -0,36380277 |  |
| 226351_at    | NSUN4           | 1,426552034  | 1,790660532  | -0,3641085  |  |
| 1570055_at   | -               | 0,917308734  | 1,281471383  | -0,36416265 |  |
| 242673_at    | -               | 0,917308734  | 1,281471383  | -0,36416265 |  |
| 212394_at    | EMC1            | 0,67554678   | 1,039887232  | -0,36434045 |  |
| 227021_at    | KDM1B           | 0,67554678   | 1,039887232  | -0,36434045 |  |
| 231827_at    | -               | 1,153678675  | 1,518263577  | -0,3645849  |  |

|              |                 |              |              |             |  |
|--------------|-----------------|--------------|--------------|-------------|--|
| 208806_at    | CHD3            | -0,622910612 | -0,258114234 | -0,36479638 |  |
| 211652_s_at  | LBP             | -0,622910612 | -0,258114234 | -0,36479638 |  |
| 228350_at    | UNC13D          | -0,622910612 | -0,258114234 | -0,36479638 |  |
| 242585_at    | LOC100131067    | -0,622910612 | -0,258114234 | -0,36479638 |  |
| 1569276_at   | -               | 0,152582607  | 0,51742585   | -0,36484324 |  |
| 221928_at    | ACACB           | 0,152582607  | 0,51742585   | -0,36484324 |  |
| 210535_at    | B9D1            | -0,467091869 | -0,102100538 | -0,36499133 |  |
| 218731_s_at  | VWA1            | -0,467091869 | -0,102100538 | -0,36499133 |  |
| 230028_at    | KIAA0907        | -0,467091869 | -0,102100538 | -0,36499133 |  |
| 231112_at    | SNRPE           | -0,467091869 | -0,102100538 | -0,36499133 |  |
| 239838_at    | ZNF776          | -0,467091869 | -0,102100538 | -0,36499133 |  |
| 240117_at    | FBN3            | -0,467091869 | -0,102100538 | -0,36499133 |  |
| 243120_at    | -               | -0,467091869 | -0,102100538 | -0,36499133 |  |
| 1555689_at   | CD80            | -3,212234735 | -2,847001814 | -0,36523292 |  |
| 1562854_at   | -               | -3,212234735 | -2,847001814 | -0,36523292 |  |
| 1566632_at   | -               | -3,212234735 | -2,847001814 | -0,36523292 |  |
| 219795_at    | SLC6A14         | -3,212234735 | -2,847001814 | -0,36523292 |  |
| 241109_at    | -               | -3,212234735 | -2,847001814 | -0,36523292 |  |
| 1552630_a_at | SRCAP           | -0,285837228 | 0,079428135  | -0,36526536 |  |
| 220217_x_at  | SPANXC          | -0,285837228 | 0,079428135  | -0,36526536 |  |
| 228882_at    | TUB             | -0,285837228 | 0,079428135  | -0,36526536 |  |
| 232229_at    | SETX            | -0,285837228 | 0,079428135  | -0,36526536 |  |
| 233221_at    | DEFB118         | -0,285837228 | 0,079428135  | -0,36526536 |  |
| 233974_s_at  | FAM129B         | -0,285837228 | 0,079428135  | -0,36526536 |  |
| 244555_at    | -               | -0,285837228 | 0,079428135  | -0,36526536 |  |
| 1552671_a_at | SLC9A7          | -1,131062212 | -0,765504029 | -0,36555818 |  |
| 1555058_a_at | LPGAT1          | -1,131062212 | -0,765504029 | -0,36555818 |  |
| 1569616_at   | GMNC            | -1,131062212 | -0,765504029 | -0,36555818 |  |
| 203187_at    | DOCK1           | -1,131062212 | -0,765504029 | -0,36555818 |  |
| 207364_at    | TEX28           | -1,131062212 | -0,765504029 | -0,36555818 |  |
| 208391_s_at  | GLP1R           | -1,131062212 | -0,765504029 | -0,36555818 |  |
| 217487_x_at  | FOLH1 /// FOLH1 | -1,131062212 | -0,765504029 | -0,36555818 |  |
| 217624_at    | PDAP1           | -1,131062212 | -0,765504029 | -0,36555818 |  |
| 233844_at    | CD99L2          | -1,131062212 | -0,765504029 | -0,36555818 |  |
| 240355_at    | -               | -1,131062212 | -0,765504029 | -0,36555818 |  |
| 244591_x_at  | RNF207          | -1,131062212 | -0,765504029 | -0,36555818 |  |
| 231635_x_at  | RNF31           | 0,052199481  | 0,417770464  | -0,36557098 |  |
| 223437_at    | PPARA           | 0,555999837  | 0,921731975  | -0,36573214 |  |
| 243088_at    | -               | 0,555999837  | 0,921731975  | -0,36573214 |  |
| 202384_s_at  | TCOF1           | 2,16388051   | 2,529740643  | -0,36586013 |  |
| 217679_x_at  | -               | 3,046446467  | 3,412387088  | -0,36594062 |  |
| 203388_at    | ARRB2           | 1,823660386  | 2,189694216  | -0,36603383 |  |
| 225007_at    | G3BP1           | 3,945276272  | 4,311461649  | -0,36618538 |  |
| 213216_at    | OTUD3           | 1,177702228  | 1,543943227  | -0,366241   |  |
| 213036_x_at  | ATP2A3          | 2,122398022  | 2,488772006  | -0,36637398 |  |
| 221324_at    | TAS2R1          | -0,055687482 | 0,310717132  | -0,36640461 |  |
| 201150_s_at  | TIMP3           | 3,893269405  | 4,259820154  | -0,36655075 |  |
| 218735_s_at  | ZNF544          | 2,022468633  | 2,389070873  | -0,36660224 |  |
| 1553907_a_at | EXD1            | -2,823166348 | -2,456406426 | -0,36675992 |  |
| 1561431_at   | -               | -2,823166348 | -2,456406426 | -0,36675992 |  |
| 210066_s_at  | AQP4            | -2,823166348 | -2,456406426 | -0,36675992 |  |
| 216189_at    | -               | -2,823166348 | -2,456406426 | -0,36675992 |  |
| 221054_s_at  | TCL6            | -2,823166348 | -2,456406426 | -0,36675992 |  |
| 223036_at    | FARSB           | -2,823166348 | -2,456406426 | -0,36675992 |  |
| 226186_at    | TMOD2           | -2,823166348 | -2,456406426 | -0,36675992 |  |
| 231340_at    | -               | -2,823166348 | -2,456406426 | -0,36675992 |  |



|              |                 |              |              |             |  |
|--------------|-----------------|--------------|--------------|-------------|--|
| 232132_at    | PARD6G          | -2,823166348 | -2,456406426 | -0,36675992 |  |
| 232523_at    | MEGF10          | -2,823166348 | -2,456406426 | -0,36675992 |  |
| 233739_at    | -               | -2,823166348 | -2,456406426 | -0,36675992 |  |
| 234154_at    | -               | -2,823166348 | -2,456406426 | -0,36675992 |  |
| 235086_at    | THBS1           | -2,823166348 | -2,456406426 | -0,36675992 |  |
| 239691_at    | C12orf77        | -2,823166348 | -2,456406426 | -0,36675992 |  |
| 242652_at    | -               | -2,823166348 | -2,456406426 | -0,36675992 |  |
| 225063_at    | UBL7            | 1,995690482  | 2,362515214  | -0,36682473 |  |
| 203811_s_at  | DNAJB4          | 1,631786706  | 1,998633167  | -0,36684646 |  |
| 205728_at    | ODZ1            | 0,401366113  | 0,768343791  | -0,36697768 |  |
| 203946_s_at  | ARG2            | 3,975055407  | 4,34210478   | -0,36704937 |  |
| 208664_s_at  | TTC3 /// TTC3P1 | 2,134723057  | 2,501934108  | -0,36721105 |  |
| 1556066_at   | KDM6B           | 0,291166226  | 0,658444279  | -0,36727805 |  |
| 226365_at    | -               | 0,747935635  | 1,115234684  | -0,36729905 |  |
| 201140_s_at  | RAB5C           | 3,335176289  | 3,702749166  | -0,36757288 |  |
| 242688_at    | -               | 1,973904239  | 2,341749893  | -0,36784565 |  |
| 205459_s_at  | NPAS2           | -1,047650486 | -0,679763839 | -0,36788665 |  |
| 214768_x_at  | IGKC            | -1,047650486 | -0,679763839 | -0,36788665 |  |
| 219327_s_at  | GPRC5C          | -1,047650486 | -0,679763839 | -0,36788665 |  |
| 220843_s_at  | DCAF13          | -1,047650486 | -0,679763839 | -0,36788665 |  |
| 221601_s_at  | FAIM3           | -1,047650486 | -0,679763839 | -0,36788665 |  |
| 227349_at    | HELLS           | -1,047650486 | -0,679763839 | -0,36788665 |  |
| 230808_at    | FNTA            | -1,047650486 | -0,679763839 | -0,36788665 |  |
| 231547_at    | ZBTB37          | -1,047650486 | -0,679763839 | -0,36788665 |  |
| 237643_at    | -               | -1,047650486 | -0,679763839 | -0,36788665 |  |
| 240319_at    | -               | -1,047650486 | -0,679763839 | -0,36788665 |  |
| 242353_at    | -               | -1,047650486 | -0,679763839 | -0,36788665 |  |
| 243429_at    | -               | -1,047650486 | -0,679763839 | -0,36788665 |  |
| 230599_at    | -               | 0,20027154   | 0,568365095  | -0,36809356 |  |
| 236107_at    | UBE2Z           | 0,20027154   | 0,568365095  | -0,36809356 |  |
| 238908_at    | -               | 1,603688695  | 1,971855016  | -0,36816632 |  |
| 222235_s_at  | CSGALNACT2      | 0,496120222  | 0,864649967  | -0,36852975 |  |
| 244220_at    | -               | 0,496120222  | 0,864649967  | -0,36852975 |  |
| 215089_s_at  | RBM10           | 3,302773593  | 3,671470423  | -0,36869683 |  |
| 214760_at    | ZNF337          | 1,021868205  | 1,390636111  | -0,36876791 |  |
| 242282_at    | ZFPM1           | 1,530951994  | 1,899812471  | -0,36886048 |  |
| 209747_at    | TGFB3           | 0,255492549  | 0,624460759  | -0,36896821 |  |
| 238324_at    | GATAD2A         | 0,255492549  | 0,624460759  | -0,36896821 |  |
| 1554950_at   | ACAN            | -0,759588698 | -0,39061235  | -0,36897635 |  |
| 206298_at    | ARHGAP22        | -0,759588698 | -0,39061235  | -0,36897635 |  |
| 206767_at    | RBMS3           | -0,759588698 | -0,39061235  | -0,36897635 |  |
| 205119_s_at  | FPR1            | -0,259832361 | 0,109221392  | -0,36905375 |  |
| 211088_s_at  | PLK4            | -0,259832361 | 0,109221392  | -0,36905375 |  |
| 211901_s_at  | PDE4A           | -0,259832361 | 0,109221392  | -0,36905375 |  |
| 225258_at    | FBLIM1          | 1,210676994  | 1,579853228  | -0,36917623 |  |
| 1559363_at   | LOC283587       | -3,32387526  | -2,954576755 | -0,3692985  |  |
| 1563000_at   | -               | -3,32387526  | -2,954576755 | -0,3692985  |  |
| 1569729_a_at | ASZ1            | -3,32387526  | -2,954576755 | -0,3692985  |  |
| 231500_s_at  | BOLA2           | 0,417596971  | 0,786897721  | -0,36930075 |  |
| 222942_s_at  | LOC100505519 /  | -0,033456564 | 0,336136178  | -0,36959274 |  |
| 232064_at    | FER             | 0,798390451  | 1,16809119   | -0,36970074 |  |
| 208056_s_at  | CBFA2T3         | 2,503131904  | 2,87289275   | -0,36976085 |  |
| 218657_at    | RAPGEFL1        | 0,695652136  | 1,065442793  | -0,36979066 |  |
| 241820_at    | RIF1            | 0,695652136  | 1,065442793  | -0,36979066 |  |
| 208685_x_at  | BRD2            | 3,107750584  | 3,477609204  | -0,36985862 |  |
| 218183_at    | C16orf5         | 0,911589958  | 1,281471383  | -0,36988142 |  |

|              |                 |              |              |             |  |
|--------------|-----------------|--------------|--------------|-------------|--|
| 225839_at    | RBM33           | 0,911589958  | 1,281471383  | -0,36988142 |  |
| 1566848_x_at | -               | -0,59053611  | -0,220592223 | -0,36994389 |  |
| 215115_x_at  | NTRK3           | -0,59053611  | -0,220592223 | -0,36994389 |  |
| 234072_at    | SEMA4A          | -0,59053611  | -0,220592223 | -0,36994389 |  |
| 207199_at    | TERT            | 0,46522187   | 0,835239052  | -0,37001718 |  |
| 208186_s_at  | LIPE            | -0,394749123 | -0,024572586 | -0,37017654 |  |
| 222764_at    | ASRGL1          | 0,606430281  | 0,976641161  | -0,37021088 |  |
| 202112_at    | VWF             | -0,83191556  | -0,461594427 | -0,37032113 |  |
| 206204_at    | GRB14           | -0,83191556  | -0,461594427 | -0,37032113 |  |
| 215388_s_at  | CFH /// CFHR1   | -0,83191556  | -0,461594427 | -0,37032113 |  |
| 229244_at    | LSAMP           | -0,83191556  | -0,461594427 | -0,37032113 |  |
| 229262_at    | PPP1R37         | -0,83191556  | -0,461594427 | -0,37032113 |  |
| 233180_at    | -               | -0,83191556  | -0,461594427 | -0,37032113 |  |
| 236212_at    | -               | -0,83191556  | -0,461594427 | -0,37032113 |  |
| 244057_s_at  | VSTM4           | -0,83191556  | -0,461594427 | -0,37032113 |  |
| 239451_at    | -               | 0,735041319  | 1,105412836  | -0,37037152 |  |
| 227998_at    | S100A16         | 0,945567441  | 1,315948728  | -0,37038129 |  |
| 1566115_at   | -               | -2,779459409 | -2,408705138 | -0,37075427 |  |
| 1569812_at   | -               | -2,779459409 | -2,408705138 | -0,37075427 |  |
| 211218_at    | -               | -2,779459409 | -2,408705138 | -0,37075427 |  |
| 231311_at    | -               | -2,779459409 | -2,408705138 | -0,37075427 |  |
| 232868_at    | C9orf11         | -2,779459409 | -2,408705138 | -0,37075427 |  |
| 233488_at    | RNASE7          | -2,779459409 | -2,408705138 | -0,37075427 |  |
| 242015_x_at  | APEH            | -0,148196756 | 0,222599095  | -0,37079585 |  |
| 218594_at    | HEATR1          | 4,032172063  | 4,403009191  | -0,37083713 |  |
| 202150_s_at  | NEDD9           | 0,384950573  | 0,755840599  | -0,37089003 |  |
| 208944_at    | TGFBR2          | 2,338135744  | 2,709065209  | -0,37092947 |  |
| 223811_s_at  | GET4 /// SUN1   | 1,995690482  | 2,366632651  | -0,37094217 |  |
| 1552269_at   | SPATA17         | -1,591296941 | -1,220210588 | -0,37108635 |  |
| 1553125_x_at | WDR62           | -1,591296941 | -1,220210588 | -0,37108635 |  |
| 1554886_a_at | MLXIP           | -1,591296941 | -1,220210588 | -0,37108635 |  |
| 1555159_at   | TMEM74          | -1,591296941 | -1,220210588 | -0,37108635 |  |
| 1559304_at   | -               | -1,591296941 | -1,220210588 | -0,37108635 |  |
| 202186_x_at  | PPP2R5A         | -1,591296941 | -1,220210588 | -0,37108635 |  |
| 207779_at    | -               | -1,591296941 | -1,220210588 | -0,37108635 |  |
| 210650_s_at  | PCLO            | -1,591296941 | -1,220210588 | -0,37108635 |  |
| 211435_at    | -               | -1,591296941 | -1,220210588 | -0,37108635 |  |
| 213722_at    | SOX2            | -1,591296941 | -1,220210588 | -0,37108635 |  |
| 213806_at    | PURA            | -1,591296941 | -1,220210588 | -0,37108635 |  |
| 216695_s_at  | TNKS            | -1,591296941 | -1,220210588 | -0,37108635 |  |
| 219844_at    | C10orf118       | -1,591296941 | -1,220210588 | -0,37108635 |  |
| 221623_at    | BCAN            | -1,591296941 | -1,220210588 | -0,37108635 |  |
| 201768_s_at  | CLINT1          | 2,568189989  | 2,939363796  | -0,37117381 |  |
| 63009_at     | SHQ1            | 2,71084378   | 3,082038276  | -0,3711945  |  |
| 236561_at    | TGFBR1          | 1,201332287  | 1,572742379  | -0,37141009 |  |
| 219265_at    | MOB3B           | 0,82905153   | 1,200746069  | -0,37169454 |  |
| 1562729_at   | -               | -0,078265071 | 0,293518836  | -0,37178391 |  |
| 1554106_at   | LOC648771 /// N | 0,123193849  | 0,495031851  | -0,371838   |  |
| 240037_at    | ITPRIPL1        | 0,123193849  | 0,495031851  | -0,371838   |  |
| 1562016_at   | -               | -0,986356909 | -0,614371577 | -0,37198533 |  |
| 1562849_at   | -               | -0,986356909 | -0,614371577 | -0,37198533 |  |
| 1567045_at   | -               | -0,986356909 | -0,614371577 | -0,37198533 |  |
| 206576_s_at  | CEACAM1         | -0,986356909 | -0,614371577 | -0,37198533 |  |
| 208210_at    | MAS1            | -0,986356909 | -0,614371577 | -0,37198533 |  |
| 208596_s_at  | UGT1A1 /// UGT  | -0,986356909 | -0,614371577 | -0,37198533 |  |
| 215719_x_at  | FAS             | -0,986356909 | -0,614371577 | -0,37198533 |  |

|              |                      |              |              |             |  |
|--------------|----------------------|--------------|--------------|-------------|--|
| 220124_at    | GAN                  | -0,986356909 | -0,614371577 | -0,37198533 |  |
| 225566_at    | NRP2                 | -0,986356909 | -0,614371577 | -0,37198533 |  |
| 233185_at    | -                    | -0,986356909 | -0,614371577 | -0,37198533 |  |
| 238568_s_at  | -                    | -0,986356909 | -0,614371577 | -0,37198533 |  |
| 239522_at    | IL12RB1              | -0,986356909 | -0,614371577 | -0,37198533 |  |
| 244576_at    | -                    | -0,986356909 | -0,614371577 | -0,37198533 |  |
| 1552828_at   | SNX18                | -1,2845686   | -0,912331589 | -0,37223701 |  |
| 207382_at    | TP63                 | -1,2845686   | -0,912331589 | -0,37223701 |  |
| 208534_s_at  | RASA4 /// RASA4      | -1,2845686   | -0,912331589 | -0,37223701 |  |
| 210049_at    | SERPINC1             | -1,2845686   | -0,912331589 | -0,37223701 |  |
| 214987_at    | GAB1                 | -1,2845686   | -0,912331589 | -0,37223701 |  |
| 227394_at    | NCAM1                | -1,2845686   | -0,912331589 | -0,37223701 |  |
| 231689_at    | TRPM7                | -1,2845686   | -0,912331589 | -0,37223701 |  |
| 236748_at    | RASGEF1C             | -1,2845686   | -0,912331589 | -0,37223701 |  |
| 239339_at    | -                    | -1,2845686   | -0,912331589 | -0,37223701 |  |
| 240506_at    | -                    | -1,2845686   | -0,912331589 | -0,37223701 |  |
| 242199_at    | -                    | -1,2845686   | -0,912331589 | -0,37223701 |  |
| 242784_at    | -                    | -1,2845686   | -0,912331589 | -0,37223701 |  |
| 207190_at    | ZZEF1                | -0,655928373 | -0,283667828 | -0,37226055 |  |
| 208651_x_at  | CD24                 | -0,655928373 | -0,283667828 | -0,37226055 |  |
| 214630_at    | CYP11B2              | -0,655928373 | -0,283667828 | -0,37226055 |  |
| 224411_at    | PLA2G12B             | -0,655928373 | -0,283667828 | -0,37226055 |  |
| 239381_at    | KLK7                 | -0,655928373 | -0,283667828 | -0,37226055 |  |
| 243099_at    | NFAM1                | -0,655928373 | -0,283667828 | -0,37226055 |  |
| 1569473_s_at | LOC155060 /// ZNF148 | 0,641402394  | 1,013870809  | -0,37246841 |  |
| 202086_at    | MX1                  | 0,641402394  | 1,013870809  | -0,37246841 |  |
| 219615_s_at  | KCNK5                | 1,726031811  | 2,098562556  | -0,37253075 |  |
| 241223_x_at  | -                    | 0,181384709  | 0,553993624  | -0,37260892 |  |
| 243111_at    | -                    | 0,181384709  | 0,553993624  | -0,37260892 |  |
| 228545_at    | ZNF148               | 1,40228911   | 1,775255987  | -0,37296688 |  |
| 218937_at    | ZNF434               | 2,420979937  | 2,794067719  | -0,37308778 |  |
| 233761_at    | -                    | 0,020670649  | 0,393761504  | -0,37309085 |  |
| 1556236_at   | -                    | -0,196756757 | 0,176436073  | -0,37319283 |  |
| 228469_at    | PPID                 | -0,196756757 | 0,176436073  | -0,37319283 |  |
| 228688_at    | LOC100506201         | 1,251994932  | 1,6252386    | -0,37324367 |  |
| 215707_s_at  | PRNP                 | 1,868628927  | 2,242180416  | -0,37355149 |  |
| 1555509_a_at | SLC25A41             | -1,424023738 | -1,050406615 | -0,37361712 |  |
| 1561301_at   | MAGI1-IT1            | -1,424023738 | -1,050406615 | -0,37361712 |  |
| 1562793_at   | -                    | -1,424023738 | -1,050406615 | -0,37361712 |  |
| 1564773_x_at | -                    | -1,424023738 | -1,050406615 | -0,37361712 |  |
| 1567237_at   | OR2L2                | -1,424023738 | -1,050406615 | -0,37361712 |  |
| 209700_x_at  | PDE4DIP              | -1,424023738 | -1,050406615 | -0,37361712 |  |
| 216364_s_at  | AFF2                 | -1,424023738 | -1,050406615 | -0,37361712 |  |
| 222254_at    | -                    | -1,424023738 | -1,050406615 | -0,37361712 |  |
| 223807_at    | IGSF1                | -1,424023738 | -1,050406615 | -0,37361712 |  |
| 227661_at    | -                    | -1,424023738 | -1,050406615 | -0,37361712 |  |
| 233226_at    | PTPN9                | -1,424023738 | -1,050406615 | -0,37361712 |  |
| 1555510_at   | ZNF215               | -3,15396682  | -2,780313924 | -0,3736529  |  |
| 205719_s_at  | PAH                  | -3,15396682  | -2,780313924 | -0,3736529  |  |
| 210383_at    | SCN1A                | -3,15396682  | -2,780313924 | -0,3736529  |  |
| 217613_at    | TMEM144              | -3,15396682  | -2,780313924 | -0,3736529  |  |
| 233996_x_at  | EYS                  | -3,15396682  | -2,780313924 | -0,3736529  |  |
| 242715_at    | -                    | -3,15396682  | -2,780313924 | -0,3736529  |  |
| 244337_at    | -                    | -3,15396682  | -2,780313924 | -0,3736529  |  |
| 217502_at    | IFIT2                | 0,984222186  | 1,3579181    | -0,37369591 |  |
| 209262_s_at  | NR2F6                | 2,416948786  | 2,791007185  | -0,3740584  |  |

|              |                 |              |              |             |  |
|--------------|-----------------|--------------|--------------|-------------|--|
| 1552280_at   | TIMD4           | -2,236765673 | -1,862647763 | -0,37411791 |  |
| 1557709_at   | -               | -2,236765673 | -1,862647763 | -0,37411791 |  |
| 1560595_at   | -               | -2,236765673 | -1,862647763 | -0,37411791 |  |
| 1568933_at   | LOC646627       | -2,236765673 | -1,862647763 | -0,37411791 |  |
| 201547_at    | KDM5B           | -2,236765673 | -1,862647763 | -0,37411791 |  |
| 208551_at    | HIST1H4G        | -2,236765673 | -1,862647763 | -0,37411791 |  |
| 214183_s_at  | TKTL1           | -2,236765673 | -1,862647763 | -0,37411791 |  |
| 224154_at    | B3GNT2          | -2,236765673 | -1,862647763 | -0,37411791 |  |
| 227399_at    | VGLL3           | -2,236765673 | -1,862647763 | -0,37411791 |  |
| 234329_at    | CLIC5           | -2,236765673 | -1,862647763 | -0,37411791 |  |
| 235632_at    | -               | -2,236765673 | -1,862647763 | -0,37411791 |  |
| 238113_at    | C13orf44-AS1    | -2,236765673 | -1,862647763 | -0,37411791 |  |
| 240691_at    | -               | -2,236765673 | -1,862647763 | -0,37411791 |  |
| 240906_at    | -               | -2,236765673 | -1,862647763 | -0,37411791 |  |
| 241334_at    | -               | -2,236765673 | -1,862647763 | -0,37411791 |  |
| 241611_s_at  | FNDC3A          | -2,236765673 | -1,862647763 | -0,37411791 |  |
| 244770_at    | -               | -2,236765673 | -1,862647763 | -0,37411791 |  |
| 1556846_at   | -               | -0,366776884 | 0,007421914  | -0,3741988  |  |
| 207600_at    | KCNC3           | -0,366776884 | 0,007421914  | -0,3741988  |  |
| 239481_at    | FAM133A         | -0,366776884 | 0,007421914  | -0,3741988  |  |
| 1557828_a_at | C5orf28         | 0,317354302  | 0,691645685  | -0,37429138 |  |
| 223901_at    | SYT3            | 0,317354302  | 0,691645685  | -0,37429138 |  |
| 200861_at    | CNOT1           | 1,666156729  | 2,040470494  | -0,37431377 |  |
| 209688_s_at  | CCDC93          | 1,446464021  | 1,820984782  | -0,37452076 |  |
| 235580_at    | ZNF141          | 1,716223609  | 2,091116676  | -0,37489307 |  |
| 206431_x_at  | TBC1D9B         | 1,352503698  | 1,728030156  | -0,37552646 |  |
| 1552303_a_at | TMEM106A        | -1,639579028 | -1,264005341 | -0,37557369 |  |
| 1552669_at   | PPP1R3B         | -1,639579028 | -1,264005341 | -0,37557369 |  |
| 1555606_a_at | GDPD1           | -1,639579028 | -1,264005341 | -0,37557369 |  |
| 1567068_at   | OR4D1           | -1,639579028 | -1,264005341 | -0,37557369 |  |
| 1570432_at   | -               | -1,639579028 | -1,264005341 | -0,37557369 |  |
| 207519_at    | SLC6A4          | -1,639579028 | -1,264005341 | -0,37557369 |  |
| 209742_s_at  | MYL2            | -1,639579028 | -1,264005341 | -0,37557369 |  |
| 210519_s_at  | NQO1            | -1,639579028 | -1,264005341 | -0,37557369 |  |
| 220792_at    | PRDM5           | -1,639579028 | -1,264005341 | -0,37557369 |  |
| 232402_at    | -               | -1,639579028 | -1,264005341 | -0,37557369 |  |
| 243089_at    | -               | -1,639579028 | -1,264005341 | -0,37557369 |  |
| 243186_at    | -               | -1,639579028 | -1,264005341 | -0,37557369 |  |
| 203687_at    | CX3CL1          | -0,512251684 | -0,136643983 | -0,3756077  |  |
| 208251_at    | KCNC4           | -0,512251684 | -0,136643983 | -0,3756077  |  |
| 227223_at    | RBM39           | -0,512251684 | -0,136643983 | -0,3756077  |  |
| 230591_at    | LOC729887       | -0,512251684 | -0,136643983 | -0,3756077  |  |
| 243808_at    | -               | -0,512251684 | -0,136643983 | -0,3756077  |  |
| 226536_at    | NSMCE2          | 3,620156261  | 3,995764148  | -0,37560789 |  |
| 239654_at    | CHD9            | 0,44160593   | 0,817300337  | -0,37569441 |  |
| 226080_at    | SSH2            | 2,520143371  | 2,895866687  | -0,37572332 |  |
| 208662_s_at  | TTC3 /// TTC3P1 | 4,474655091  | 4,850531814  | -0,37587672 |  |
| 207813_s_at  | FDXR            | 1,073999308  | 1,450051551  | -0,37605224 |  |
| 201279_s_at  | DAB2            | 2,456762221  | 2,833274877  | -0,37651266 |  |
| 204773_at    | IL11RA          | -0,172274514 | 0,204310755  | -0,37658527 |  |
| 219745_at    | TMEM180         | -0,172274514 | 0,204310755  | -0,37658527 |  |
| 205345_at    | BARD1           | 1,954567604  | 2,331254065  | -0,37668646 |  |
| 1567297_at   | OR13C4          | -0,79540287  | -0,41858459  | -0,37681828 |  |
| 217295_at    | MUC8            | -0,79540287  | -0,41858459  | -0,37681828 |  |
| 231514_at    | C1orf94         | -0,79540287  | -0,41858459  | -0,37681828 |  |
| 235733_at    | GXYLT2          | -0,79540287  | -0,41858459  | -0,37681828 |  |

|              |                |              |              |             |  |
|--------------|----------------|--------------|--------------|-------------|--|
| 242773_at    | SLC5A1         | -0,79540287  | -0,41858459  | -0,37681828 |  |
| 244615_x_at  | TARSL2         | -0,79540287  | -0,41858459  | -0,37681828 |  |
| 211031_s_at  | CLIP2          | 0,728550685  | 1,105412836  | -0,37686215 |  |
| 225627_s_at  | CACHD1         | 0,728550685  | 1,105412836  | -0,37686215 |  |
| 219655_at    | C7orf10        | 0,359971644  | 0,73688026   | -0,37690862 |  |
| 237622_at    | -              | 0,359971644  | 0,73688026   | -0,37690862 |  |
| 1552801_at   | CAPN13         | -2,712026959 | -2,335104118 | -0,37692284 |  |
| 1555433_at   | SLC39A14       | -2,712026959 | -2,335104118 | -0,37692284 |  |
| 1557176_a_at | C14orf37       | -2,712026959 | -2,335104118 | -0,37692284 |  |
| 1557739_at   | -              | -2,712026959 | -2,335104118 | -0,37692284 |  |
| 1562686_at   | -              | -2,712026959 | -2,335104118 | -0,37692284 |  |
| 207331_at    | CENPF          | -2,712026959 | -2,335104118 | -0,37692284 |  |
| 207407_x_at  | CYP4A11        | -2,712026959 | -2,335104118 | -0,37692284 |  |
| 210562_at    | GREB1          | -2,712026959 | -2,335104118 | -0,37692284 |  |
| 215473_at    | -              | -2,712026959 | -2,335104118 | -0,37692284 |  |
| 216156_at    | RECK           | -2,712026959 | -2,335104118 | -0,37692284 |  |
| 217479_at    | -              | -2,712026959 | -2,335104118 | -0,37692284 |  |
| 222367_at    | WHAMMP2 /// W  | -2,712026959 | -2,335104118 | -0,37692284 |  |
| 222378_at    | -              | -2,712026959 | -2,335104118 | -0,37692284 |  |
| 231160_at    | -              | -2,712026959 | -2,335104118 | -0,37692284 |  |
| 231513_at    | -              | -2,712026959 | -2,335104118 | -0,37692284 |  |
| 241055_at    | -              | -2,712026959 | -2,335104118 | -0,37692284 |  |
| 243836_at    | UNC80          | -2,712026959 | -2,335104118 | -0,37692284 |  |
| 1556356_at   | ERICH1         | -0,423248115 | -0,046302147 | -0,37694597 |  |
| 210025_s_at  | CARD10         | -0,423248115 | -0,046302147 | -0,37694597 |  |
| 229483_at    | -              | -0,423248115 | -0,046302147 | -0,37694597 |  |
| 241787_at    | -              | -0,423248115 | -0,046302147 | -0,37694597 |  |
| 224646_x_at  | H19 /// MIR675 | 2,466546243  | 2,843651104  | -0,37710486 |  |
| 1558613_at   | -              | -1,196375121 | -0,819238336 | -0,37713679 |  |
| 202376_at    | SERPINA3       | -1,196375121 | -0,819238336 | -0,37713679 |  |
| 202897_at    | SIRPA          | -1,196375121 | -0,819238336 | -0,37713679 |  |
| 204070_at    | RARRES3        | -1,196375121 | -0,819238336 | -0,37713679 |  |
| 206229_x_at  | PAX2           | -1,196375121 | -0,819238336 | -0,37713679 |  |
| 207985_at    | -              | -1,196375121 | -0,819238336 | -0,37713679 |  |
| 213856_at    | CD47           | -1,196375121 | -0,819238336 | -0,37713679 |  |
| 215451_s_at  | AFF1           | -1,196375121 | -0,819238336 | -0,37713679 |  |
| 216512_s_at  | DCT            | -1,196375121 | -0,819238336 | -0,37713679 |  |
| 220213_at    | TSHZ2          | -1,196375121 | -0,819238336 | -0,37713679 |  |
| 223549_s_at  | ESPN           | -1,196375121 | -0,819238336 | -0,37713679 |  |
| 232046_at    | KIAA1217       | -1,196375121 | -0,819238336 | -0,37713679 |  |
| 237262_at    | FAM59A         | -1,196375121 | -0,819238336 | -0,37713679 |  |
| 242040_at    | GCNT7          | -1,196375121 | -0,819238336 | -0,37713679 |  |
| 244478_at    | LRRC37A3       | 0,767063567  | 1,144305291  | -0,37724172 |  |
| 240456_at    | ANKRD55        | 1,805273023  | 2,182705233  | -0,37743221 |  |
| 226805_at    | FITM2          | 1,64218396   | 2,019703483  | -0,37751952 |  |
| 206747_at    | GPRIN2         | 0,457392764  | 0,835239052  | -0,37784629 |  |
| 207828_s_at  | CENPF          | 3,664184451  | 4,042195463  | -0,37801101 |  |
| 218466_at    | TBC1D17        | 0,246434561  | 0,624460759  | -0,3780262  |  |
| 202605_at    | GUSB           | 3,008105382  | 3,386261038  | -0,37815566 |  |
| 226988_s_at  | MYH14          | -0,00073712  | 0,377530647  | -0,37826777 |  |
| 236134_at    | DCAF7          | -0,00073712  | 0,377530647  | -0,37826777 |  |
| 242387_at    | C8orf42        | -0,00073712  | 0,377530647  | -0,37826777 |  |
| 1552418_at   | TTLL10         | -0,57445847  | -0,19610998  | -0,37834849 |  |
| 1555300_a_at | MED12L         | -0,57445847  | -0,19610998  | -0,37834849 |  |
| 1561133_at   | -              | -0,57445847  | -0,19610998  | -0,37834849 |  |
| 204613_at    | PLCG2          | -0,57445847  | -0,19610998  | -0,37834849 |  |

|              |                 |              |              |             |  |
|--------------|-----------------|--------------|--------------|-------------|--|
| 207825_s_at  | GHRHR           | -0,57445847  | -0,19610998  | -0,37834849 |  |
| 231761_at    | FFAR1           | -0,57445847  | -0,19610998  | -0,37834849 |  |
| 237362_at    | ZFP41           | -0,57445847  | -0,19610998  | -0,37834849 |  |
| 237624_at    | -               | -0,57445847  | -0,19610998  | -0,37834849 |  |
| 221963_x_at  | ZNF587B         | 1,732533761  | 2,110887591  | -0,37835383 |  |
| 225675_at    | C14orf101       | 1,829737795  | 2,208167653  | -0,37842986 |  |
| 221829_s_at  | TNPO1           | 4,593939638  | 4,972390023  | -0,37845038 |  |
| 207375_s_at  | IL15RA          | -0,299034815 | 0,079428135  | -0,37846295 |  |
| 242701_at    | TBRG1           | -0,299034815 | 0,079428135  | -0,37846295 |  |
| 205854_at    | TULP3           | 1,442503549  | 1,820984782  | -0,37848123 |  |
| 225051_at    | EPB41           | 4,275330031  | 4,653984658  | -0,37865463 |  |
| 225175_s_at  | SLC44A2         | 2,637386731  | 3,016072743  | -0,37868601 |  |
| 226728_at    | SLC27A1         | 0,945567441  | 1,324440845  | -0,3788734  |  |
| 1552489_s_at | MPP4            | -3,114791413 | -2,735862426 | -0,37892899 |  |
| 1556935_at   | -               | -3,114791413 | -2,735862426 | -0,37892899 |  |
| 1560962_at   | -               | -3,114791413 | -2,735862426 | -0,37892899 |  |
| 1570050_at   | -               | -3,114791413 | -2,735862426 | -0,37892899 |  |
| 208288_at    | ABCB11          | -3,114791413 | -2,735862426 | -0,37892899 |  |
| 209287_s_at  | CDC42EP3        | 1,614289682  | 1,993317152  | -0,37902747 |  |
| 239283_at    | TMED5           | 0,376672223  | 0,755840599  | -0,37916838 |  |
| 211992_at    | WNK1            | 2,427005622  | 2,806245339  | -0,37923972 |  |
| 239392_s_at  | POGK            | 1,748661581  | 2,127967638  | -0,37930606 |  |
| 228920_at    | ZNF260          | 4,488646614  | 4,868064518  | -0,3794179  |  |
| 209049_s_at  | ZMYND8          | 3,617524043  | 3,997092735  | -0,37956869 |  |
| 225458_at    | PP7080          | 0,425644434  | 0,805216064  | -0,37957163 |  |
| 215026_x_at  | SCNN1A          | 0,152582607  | 0,532164371  | -0,37958176 |  |
| 219708_at    | NT5M            | 0,152582607  | 0,532164371  | -0,37958176 |  |
| 1569805_at   | -               | -1,026571149 | -0,646746079 | -0,37982507 |  |
| 205730_s_at  | ABLIM3          | -1,026571149 | -0,646746079 | -0,37982507 |  |
| 210483_at    | LOC254896 /// T | -1,026571149 | -0,646746079 | -0,37982507 |  |
| 216995_x_at  | MKRN2           | -1,026571149 | -0,646746079 | -0,37982507 |  |
| 217376_at    | LOC100289473    | -1,026571149 | -0,646746079 | -0,37982507 |  |
| 219438_at    | NKAIN1          | -1,026571149 | -0,646746079 | -0,37982507 |  |
| 221672_s_at  | TRAPPC9         | -1,026571149 | -0,646746079 | -0,37982507 |  |
| 227434_at    | WBSCR17         | -1,026571149 | -0,646746079 | -0,37982507 |  |
| 214911_s_at  | BRD2            | 3,294008537  | 3,673964604  | -0,37995607 |  |
| 1554629_at   | EPHA7           | -0,946847173 | -0,566887459 | -0,37995971 |  |
| 1561965_at   | SNRPB2          | -0,946847173 | -0,566887459 | -0,37995971 |  |
| 1566586_at   | -               | -0,946847173 | -0,566887459 | -0,37995971 |  |
| 209425_at    | AMACR /// C1QT  | -0,946847173 | -0,566887459 | -0,37995971 |  |
| 217264_s_at  | SCNN1A          | -0,946847173 | -0,566887459 | -0,37995971 |  |
| 221356_x_at  | P2RX2           | -0,946847173 | -0,566887459 | -0,37995971 |  |
| 222354_at    | F11R            | -0,946847173 | -0,566887459 | -0,37995971 |  |
| 229972_at    | LOC100505500    | -0,946847173 | -0,566887459 | -0,37995971 |  |
| 230238_at    | SOWAHA          | -0,946847173 | -0,566887459 | -0,37995971 |  |
| 232762_at    | KIAA1217        | -0,946847173 | -0,566887459 | -0,37995971 |  |
| 236357_at    | -               | -0,946847173 | -0,566887459 | -0,37995971 |  |
| 1563502_at   | ZDHHC2          | -0,112808516 | 0,26733076   | -0,38013928 |  |
| 205059_s_at  | IDUA            | -0,112808516 | 0,26733076   | -0,38013928 |  |
| 227266_s_at  | FYB             | -0,112808516 | 0,26733076   | -0,38013928 |  |
| 40837_at     | TLE2            | 0,620521019  | 1,000684521  | -0,3801635  |  |
| 225373_at    | C10orf54        | 0,735041319  | 1,115234684  | -0,38019337 |  |
| 1555745_a_at | LYZ             | 1,119359127  | 1,499637023  | -0,3802779  |  |
| 216593_s_at  | LOC100505991 /  | 1,672933557  | 2,053299695  | -0,38036614 |  |
| 217173_s_at  | LDLR            | 1,672933557  | 2,053299695  | -0,38036614 |  |
| 235917_at    | -               | 0,95671774   | 1,337086025  | -0,38036828 |  |

|              |              |              |              |             |  |
|--------------|--------------|--------------|--------------|-------------|--|
| 228335_at    | CLDN11       | 2,849652795  | 3,23005767   | -0,38040488 |  |
| 1553574_at   | IFNE         | -2,667025278 | -2,286583451 | -0,38044183 |  |
| 1556814_a_at | -            | -2,667025278 | -2,286583451 | -0,38044183 |  |
| 1559655_at   | LOC100507244 | -2,667025278 | -2,286583451 | -0,38044183 |  |
| 1560514_at   | LOC285205    | -2,667025278 | -2,286583451 | -0,38044183 |  |
| 1561098_at   | LINC00616    | -2,667025278 | -2,286583451 | -0,38044183 |  |
| 1561467_at   | -            | -2,667025278 | -2,286583451 | -0,38044183 |  |
| 1564072_at   | MYH16        | -2,667025278 | -2,286583451 | -0,38044183 |  |
| 1565925_at   | SLC17A4      | -2,667025278 | -2,286583451 | -0,38044183 |  |
| 206826_at    | PMP2         | -2,667025278 | -2,286583451 | -0,38044183 |  |
| 211422_at    | TRPM3        | -2,667025278 | -2,286583451 | -0,38044183 |  |
| 214521_at    | HES2         | -2,667025278 | -2,286583451 | -0,38044183 |  |
| 224109_at    | -            | -2,667025278 | -2,286583451 | -0,38044183 |  |
| 234855_at    | ORF1         | -2,667025278 | -2,286583451 | -0,38044183 |  |
| 238103_at    | LOC100505989 | -2,667025278 | -2,286583451 | -0,38044183 |  |
| 238204_at    | -            | -2,667025278 | -2,286583451 | -0,38044183 |  |
| 238229_at    | TMEM67       | -2,667025278 | -2,286583451 | -0,38044183 |  |
| 238310_at    | -            | -2,667025278 | -2,286583451 | -0,38044183 |  |
| 241180_at    | LOC100129112 | -2,667025278 | -2,286583451 | -0,38044183 |  |
| 243169_at    | -            | -2,667025278 | -2,286583451 | -0,38044183 |  |
| 244226_s_at  | -            | -2,667025278 | -2,286583451 | -0,38044183 |  |
| 244830_at    | RASIP1       | -2,667025278 | -2,286583451 | -0,38044183 |  |
| 207937_x_at  | FGFR1        | 0,541261317  | 0,921731975  | -0,38047066 |  |
| 211828_s_at  | TNIK         | 2,16388051   | 2,544354523  | -0,38047401 |  |
| 205406_s_at  | SPA17        | 1,446464021  | 1,826973888  | -0,38050987 |  |
| 213623_at    | KIF3A        | 1,191926657  | 1,572742379  | -0,38081572 |  |
| 226620_x_at  | DAZAP1       | 4,282548314  | 4,66363827   | -0,38108996 |  |
| 210350_x_at  | ING1         | 1,261018186  | 1,642321262  | -0,38130308 |  |
| 1553016_at   | GPR113       | -0,352951799 | 0,028364014  | -0,38131581 |  |
| 1554967_at   | DIP2A        | -0,352951799 | 0,028364014  | -0,38131581 |  |
| 1557718_at   | PPP2R5C      | -0,352951799 | 0,028364014  | -0,38131581 |  |
| 1566231_at   | -            | -0,352951799 | 0,028364014  | -0,38131581 |  |
| 206436_at    | MPPED1       | -0,352951799 | 0,028364014  | -0,38131581 |  |
| 219996_at    | ASB7         | -0,352951799 | 0,028364014  | -0,38131581 |  |
| 242048_at    | PFDN6        | 0,934330293  | 1,315948728  | -0,38161844 |  |
| 235652_at    | -            | 0,46522187   | 0,847075464  | -0,38185359 |  |
| 71933_at     | WNT6         | 0,747935635  | 1,129843209  | -0,38190757 |  |
| 231552_at    | -            | 0,747935635  | 1,129843209  | -0,38190757 |  |
| 226480_at    | -            | 2,017152618  | 2,39915583   | -0,38200321 |  |
| 217621_at    | SLC6A2       | -3,37835     | -2,996335703 | -0,3820143  |  |
| 214179_s_at  | NFE2L1       | 1,67631007   | 2,058399602  | -0,38208953 |  |
| 227896_at    | BCCIP        | 3,243687542  | 3,625821706  | -0,38213416 |  |
| 224243_at    | APOA5        | 0,171847695  | 0,553993624  | -0,38214593 |  |
| 227344_at    | IKZF1        | 0,171847695  | 0,553993624  | -0,38214593 |  |
| 1558385_at   | -            | -1,71423189  | -1,332017329 | -0,38221456 |  |
| 1563608_a_at | KCNT1        | -1,71423189  | -1,332017329 | -0,38221456 |  |
| 205475_at    | SCRG1        | -1,71423189  | -1,332017329 | -0,38221456 |  |
| 210623_at    | UBXN1        | -1,71423189  | -1,332017329 | -0,38221456 |  |
| 212724_at    | RND3         | -1,71423189  | -1,332017329 | -0,38221456 |  |
| 213640_s_at  | LOX          | -1,71423189  | -1,332017329 | -0,38221456 |  |
| 213925_at    | C1orf95      | -1,71423189  | -1,332017329 | -0,38221456 |  |
| 221181_at    | -            | -1,71423189  | -1,332017329 | -0,38221456 |  |
| 234618_at    | -            | -1,71423189  | -1,332017329 | -0,38221456 |  |
| 236084_at    | -            | -1,71423189  | -1,332017329 | -0,38221456 |  |
| 239211_at    | LOC100506251 | -1,71423189  | -1,332017329 | -0,38221456 |  |
| 239444_at    | LOC728024    | -1,71423189  | -1,332017329 | -0,38221456 |  |

|              |                 |              |              |             |  |
|--------------|-----------------|--------------|--------------|-------------|--|
| 202120_x_at  | AP2S1           | 4,301257907  | 4,683579237  | -0,38232133 |  |
| 227432_s_at  | -               | 2,185368281  | 2,567790814  | -0,38242253 |  |
| 210114_at    | INVS            | 0,841135803  | 1,223626587  | -0,38249078 |  |
| 224942_at    | PAPPA           | 0,255492549  | 0,638150376  | -0,38265783 |  |
| 203147_s_at  | TRIM14          | 1,496984567  | 1,879785595  | -0,38280103 |  |
| 1557867_s_at | C9orf117        | 0,911589958  | 1,294497133  | -0,38290717 |  |
| 1557385_at   | FAM161A         | -0,543051993 | -0,160136748 | -0,38291524 |  |
| 221279_at    | GDAP1           | -0,543051993 | -0,160136748 | -0,38291524 |  |
| 206524_at    | T               | 0,30867765   | 0,691645685  | -0,38296804 |  |
| 202517_at    | CRMP1           | 0,682279745  | 1,065442793  | -0,38316305 |  |
| 204967_at    | SHROOM2         | -0,089689931 | 0,293518836  | -0,38320877 |  |
| 205987_at    | CD1C            | -0,089689931 | 0,293518836  | -0,38320877 |  |
| 226305_at    | LYNX1           | -0,089689931 | 0,293518836  | -0,38320877 |  |
| 222636_at    | MED28           | 0,995078803  | 1,378453643  | -0,38337484 |  |
| 207713_s_at  | RBCK1           | 0,384950573  | 0,768343791  | -0,38339322 |  |
| 226094_at    | PIK3C2A         | 0,760715727  | 1,144305291  | -0,38358956 |  |
| 1570143_at   | -               | 1,649074067  | 2,032717854  | -0,38364379 |  |
| 213901_x_at  | RBFOX2          | 1,292162421  | 1,675891488  | -0,38372907 |  |
| 226010_at    | SLC25A23        | 2,009141686  | 2,39311332   | -0,38397163 |  |
| 1562559_at   | C9orf89         | -0,706943342 | -0,322870281 | -0,38407306 |  |
| 1562563_at   | HCN1            | -0,706943342 | -0,322870281 | -0,38407306 |  |
| 1570405_at   | -               | -0,706943342 | -0,322870281 | -0,38407306 |  |
| 216006_at    | -               | -0,706943342 | -0,322870281 | -0,38407306 |  |
| 220463_at    | TRPM3           | -0,706943342 | -0,322870281 | -0,38407306 |  |
| 224066_s_at  | HIPK2           | -0,706943342 | -0,322870281 | -0,38407306 |  |
| 238517_at    | KLF7            | -0,706943342 | -0,322870281 | -0,38407306 |  |
| 207705_s_at  | NINL            | 0,072842263  | 0,456918297  | -0,38407603 |  |
| 1555708_a_at | OFCC1           | -3,07502285  | -2,690860744 | -0,38416211 |  |
| 207981_s_at  | ESRRG           | -3,07502285  | -2,690860744 | -0,38416211 |  |
| 238978_at    | -               | -3,07502285  | -2,690860744 | -0,38416211 |  |
| 239849_at    | -               | -3,07502285  | -2,690860744 | -0,38416211 |  |
| 239921_at    | COL28A1         | -3,07502285  | -2,690860744 | -0,38416211 |  |
| 241305_at    | -               | -3,07502285  | -2,690860744 | -0,38416211 |  |
| 241473_at    | -               | -3,07502285  | -2,690860744 | -0,38416211 |  |
| 243654_at    | -               | -3,07502285  | -2,690860744 | -0,38416211 |  |
| 243696_at    | CEP104          | -3,07502285  | -2,690860744 | -0,38416211 |  |
| 244277_at    | -               | -3,07502285  | -2,690860744 | -0,38416211 |  |
| 244340_x_at  | -               | -3,07502285  | -2,690860744 | -0,38416211 |  |
| 1556950_s_at | SERPINB6        | 1,381753566  | 1,765933685  | -0,38418012 |  |
| 244778_x_at  | -               | 0,888485433  | 1,272721751  | -0,38423632 |  |
| 203118_at    | PCSK7           | 1,177702228  | 1,562009954  | -0,38430773 |  |
| 1560238_at   | LOC100506930    | -1,240169874 | -0,855751026 | -0,38441885 |  |
| 207347_at    | ERCC6           | -1,240169874 | -0,855751026 | -0,38441885 |  |
| 224135_at    | WDR87           | -1,240169874 | -0,855751026 | -0,38441885 |  |
| 230247_at    | -               | -1,240169874 | -0,855751026 | -0,38441885 |  |
| 232964_at    | SPDYE1 /// SPDY | -1,240169874 | -0,855751026 | -0,38441885 |  |
| 238351_x_at  | -               | -1,240169874 | -0,855751026 | -0,38441885 |  |
| 241317_at    | -               | -1,240169874 | -0,855751026 | -0,38441885 |  |
| 218599_at    | REC8            | 1,46610492   | 1,85068474   | -0,38457982 |  |
| 222555_s_at  | MRPL44          | 3,158127685  | 3,542741726  | -0,38461404 |  |
| 225751_at    | RBM17           | 3,236843482  | 3,621520989  | -0,38467751 |  |
| 212109_at    | HN1L            | 1,868628927  | 2,253342112  | -0,38471319 |  |
| 231073_at    | C1orf168        | -0,325749314 | 0,059218869  | -0,38496818 |  |
| 203751_x_at  | JUND            | 0,273439642  | 0,658444279  | -0,38500464 |  |
| 237736_at    | BSND            | 0,273439642  | 0,658444279  | -0,38500464 |  |
| 243394_at    | -               | 0,273439642  | 0,658444279  | -0,38500464 |  |



|              |              |              |              |             |  |
|--------------|--------------|--------------|--------------|-------------|--|
| 236454_at    | RNF212       | 0,351548291  | 0,73688026   | -0,38533197 |  |
| 224666_at    | NSMCE1       | 3,438212789  | 3,823741953  | -0,38552916 |  |
| 1555434_a_at | SLC39A14     | 0,401366113  | 0,786897721  | -0,38553161 |  |
| 233480_at    | TMEM43       | 0,401366113  | 0,786897721  | -0,38553161 |  |
| 210678_s_at  | AGPAT2       | 1,473887017  | 1,859476797  | -0,38558978 |  |
| 1556775_at   | -            | -2,597496523 | -2,211750327 | -0,3857462  |  |
| 1560087_a_at | -            | -2,597496523 | -2,211750327 | -0,3857462  |  |
| 1560105_at   | PTPRB        | -2,597496523 | -2,211750327 | -0,3857462  |  |
| 1564315_at   | C8orf49      | -2,597496523 | -2,211750327 | -0,3857462  |  |
| 1569876_at   | C17orf57     | -2,597496523 | -2,211750327 | -0,3857462  |  |
| 211103_at    | MYO7A        | -2,597496523 | -2,211750327 | -0,3857462  |  |
| 214772_at    | C11orf41     | -2,597496523 | -2,211750327 | -0,3857462  |  |
| 216635_at    | -            | -2,597496523 | -2,211750327 | -0,3857462  |  |
| 216770_at    | -            | -2,597496523 | -2,211750327 | -0,3857462  |  |
| 216793_x_at  | -            | -2,597496523 | -2,211750327 | -0,3857462  |  |
| 222178_s_at  | -            | -2,597496523 | -2,211750327 | -0,3857462  |  |
| 233194_at    | -            | -2,597496523 | -2,211750327 | -0,3857462  |  |
| 237522_at    | FAS-AS1      | -2,597496523 | -2,211750327 | -0,3857462  |  |
| 240626_at    | -            | -2,597496523 | -2,211750327 | -0,3857462  |  |
| 241256_at    | LOC100131283 | -2,597496523 | -2,211750327 | -0,3857462  |  |
| 243812_at    | IFT27        | -2,597496523 | -2,211750327 | -0,3857462  |  |
| 1555303_at   | -            | -1,763254337 | -1,377419394 | -0,38583494 |  |
| 1557682_a_at | LOC284688    | -1,763254337 | -1,377419394 | -0,38583494 |  |
| 1558714_at   | -            | -1,763254337 | -1,377419394 | -0,38583494 |  |
| 1559126_at   | RRP12        | -1,763254337 | -1,377419394 | -0,38583494 |  |
| 1559826_a_at | LOC401074    | -1,763254337 | -1,377419394 | -0,38583494 |  |
| 1561514_at   | LOC400655    | -1,763254337 | -1,377419394 | -0,38583494 |  |
| 1561579_at   | LOC728445    | -1,763254337 | -1,377419394 | -0,38583494 |  |
| 1566152_a_at | LOC100507106 | -1,763254337 | -1,377419394 | -0,38583494 |  |
| 1567628_at   | CD74         | -1,763254337 | -1,377419394 | -0,38583494 |  |
| 1569741_at   | -            | -1,763254337 | -1,377419394 | -0,38583494 |  |
| 1570131_at   | LOC285847    | -1,763254337 | -1,377419394 | -0,38583494 |  |
| 1570624_at   | -            | -1,763254337 | -1,377419394 | -0,38583494 |  |
| 209099_x_at  | JAG1         | -1,763254337 | -1,377419394 | -0,38583494 |  |
| 211413_s_at  | PADI4        | -1,763254337 | -1,377419394 | -0,38583494 |  |
| 217514_at    | -            | -1,763254337 | -1,377419394 | -0,38583494 |  |
| 219724_s_at  | TESPA1       | -1,763254337 | -1,377419394 | -0,38583494 |  |
| 221341_s_at  | OR1D5        | -1,763254337 | -1,377419394 | -0,38583494 |  |
| 221347_at    | CHRM5        | -1,763254337 | -1,377419394 | -0,38583494 |  |
| 234146_at    | B3GAT2       | -1,763254337 | -1,377419394 | -0,38583494 |  |
| 235765_at    | TLE4         | -1,763254337 | -1,377419394 | -0,38583494 |  |
| 236879_at    | -            | -1,763254337 | -1,377419394 | -0,38583494 |  |
| 237610_at    | -            | -1,763254337 | -1,377419394 | -0,38583494 |  |
| 237952_at    | -            | -1,763254337 | -1,377419394 | -0,38583494 |  |
| 238710_at    | TMEM86A      | -1,763254337 | -1,377419394 | -0,38583494 |  |
| 243205_at    | -            | -1,763254337 | -1,377419394 | -0,38583494 |  |
| 204558_at    | RAD54L       | 1,780386218  | 2,166264721  | -0,3858785  |  |
| 1554977_at   | C20orf201    | -0,136301282 | 0,249604176  | -0,38590546 |  |
| 222144_at    | KIF17        | -0,136301282 | 0,249604176  | -0,38590546 |  |
| 1557996_at   | -            | 0,518867317  | 0,904843258  | -0,38597594 |  |
| 203408_s_at  | SATB1        | 0,518867317  | 0,904843258  | -0,38597594 |  |
| 238020_at    | PSMC2        | 0,518867317  | 0,904843258  | -0,38597594 |  |
| 1555222_a_at | -            | 0,984222186  | 1,370274469  | -0,38605228 |  |
| 218815_s_at  | TMEM51       | 2,675004741  | 3,061230246  | -0,3862255  |  |
| 228248_at    | RICTOR       | 2,416948786  | 2,803210557  | -0,38626177 |  |
| 205104_at    | SNPH         | 1,659347917  | 2,045615873  | -0,38626796 |  |

|              |                 |              |              |             |  |
|--------------|-----------------|--------------|--------------|-------------|--|
| 238083_at    | PARP10          | -0,033456564 | 0,352836757  | -0,38629332 |  |
| 202030_at    | BCKDK           | 1,063722698  | 1,450051551  | -0,38632885 |  |
| 201533_at    | CTNNB1          | 5,050576033  | 5,436991227  | -0,38641519 |  |
| 203331_s_at  | INPP5D          | 0,03125738   | 0,417770464  | -0,38651308 |  |
| 215279_at    | -               | 0,03125738   | 0,417770464  | -0,38651308 |  |
| 228498_at    | B4GALT1         | 2,566371329  | 2,953119918  | -0,38674859 |  |
| 235138_at    | -               | 1,549482847  | 1,936283387  | -0,38680054 |  |
| 242121_at    | -               | 3,248232277  | 3,635238397  | -0,38700612 |  |
| 203518_at    | LYST            | 0,859074518  | 1,246149888  | -0,38707537 |  |
| 209324_s_at  | RGS16           | 0,613492853  | 1,000684521  | -0,38719167 |  |
| 210269_s_at  | AKAP17A         | 0,613492853  | 1,000684521  | -0,38719167 |  |
| 203979_at    | CYP27A1         | 0,317354302  | 0,704715219  | -0,38736092 |  |
| 228435_at    | FEM1A           | 0,317354302  | 0,704715219  | -0,38736092 |  |
| 205626_s_at  | CALB1           | 2,035673598  | 2,423075926  | -0,38740233 |  |
| 219407_s_at  | LAMC3           | 1,512180019  | 1,899812471  | -0,38763245 |  |
| 243003_at    | -               | 0,533835206  | 0,921731975  | -0,38789677 |  |
| 215172_at    | PTPN20A /// PTF | -3,342483913 | -2,954576755 | -0,38790716 |  |
| 220109_at    | TF              | -3,342483913 | -2,954576755 | -0,38790716 |  |
| 1570425_s_at | LATS1           | -1,543331864 | -1,154897679 | -0,38843419 |  |
| 202888_s_at  | ANPEP           | -1,543331864 | -1,154897679 | -0,38843419 |  |
| 205544_s_at  | CR2             | -1,543331864 | -1,154897679 | -0,38843419 |  |
| 232833_at    | -               | -1,543331864 | -1,154897679 | -0,38843419 |  |
| 233129_at    | -               | -1,543331864 | -1,154897679 | -0,38843419 |  |
| 233985_x_at  | PPP1R9A         | -1,543331864 | -1,154897679 | -0,38843419 |  |
| 241464_s_at  | -               | -1,543331864 | -1,154897679 | -0,38843419 |  |
| 241808_at    | ZC2HC1A         | -1,543331864 | -1,154897679 | -0,38843419 |  |
| 1566870_at   | -               | -0,259832361 | 0,128747141  | -0,3885795  |  |
| 236217_at    | SLC31A1         | -0,259832361 | 0,128747141  | -0,3885795  |  |
| 1552398_a_at | CLEC12A         | -2,551294263 | -2,162639771 | -0,38865449 |  |
| 1552658_a_at | NAV3            | -2,551294263 | -2,162639771 | -0,38865449 |  |
| 1559256_at   | MAGI1           | -2,551294263 | -2,162639771 | -0,38865449 |  |
| 1565650_at   | -               | -2,551294263 | -2,162639771 | -0,38865449 |  |
| 1568620_at   | CSAD            | -2,551294263 | -2,162639771 | -0,38865449 |  |
| 1568812_at   | LOC100507140    | -2,551294263 | -2,162639771 | -0,38865449 |  |
| 1569646_a_at | KIRREL3-AS2     | -2,551294263 | -2,162639771 | -0,38865449 |  |
| 203498_at    | RCAN2           | -2,551294263 | -2,162639771 | -0,38865449 |  |
| 214087_s_at  | MYBPC1          | -2,551294263 | -2,162639771 | -0,38865449 |  |
| 214321_at    | NOV             | -2,551294263 | -2,162639771 | -0,38865449 |  |
| 219355_at    | CXorf57         | -2,551294263 | -2,162639771 | -0,38865449 |  |
| 227241_at    | MUC15           | -2,551294263 | -2,162639771 | -0,38865449 |  |
| 232960_at    | NUP62CL         | -2,551294263 | -2,162639771 | -0,38865449 |  |
| 233240_at    | -               | -2,551294263 | -2,162639771 | -0,38865449 |  |
| 235307_at    | LMTK2           | -2,551294263 | -2,162639771 | -0,38865449 |  |
| 236930_at    | NUMB            | -2,551294263 | -2,162639771 | -0,38865449 |  |
| 242740_at    | -               | -2,551294263 | -2,162639771 | -0,38865449 |  |
| 242744_s_at  | CASR            | -2,551294263 | -2,162639771 | -0,38865449 |  |
| 243174_at    | -               | -2,551294263 | -2,162639771 | -0,38865449 |  |
| 202200_s_at  | SRPK1           | 4,604390697  | 4,993178622  | -0,38878793 |  |
| 1566678_at   | MMP2            | -0,078265071 | 0,310717132  | -0,3889822  |  |
| 210218_s_at  | SP100           | -0,078265071 | 0,310717132  | -0,3889822  |  |
| 213651_at    | INPP5J          | -0,078265071 | 0,310717132  | -0,3889822  |  |
| 227716_at    | UBXN11          | -0,078265071 | 0,310717132  | -0,3889822  |  |
| 1552507_at   | KCNE4           | -1,812418401 | -1,423348341 | -0,38907006 |  |
| 1553451_at   | CCDC79          | -1,812418401 | -1,423348341 | -0,38907006 |  |
| 1555162_at   | ARHGAP8 /// PR  | -1,812418401 | -1,423348341 | -0,38907006 |  |
| 1557056_at   | C5orf47         | -1,812418401 | -1,423348341 | -0,38907006 |  |

|              |                 |              |              |             |  |
|--------------|-----------------|--------------|--------------|-------------|--|
| 1562940_at   | -               | -1,812418401 | -1,423348341 | -0,38907006 |  |
| 202761_s_at  | SYNE2           | -1,812418401 | -1,423348341 | -0,38907006 |  |
| 206236_at    | GPR4            | -1,812418401 | -1,423348341 | -0,38907006 |  |
| 206682_at    | CLEC10A         | -1,812418401 | -1,423348341 | -0,38907006 |  |
| 207659_s_at  | MOBP            | -1,812418401 | -1,423348341 | -0,38907006 |  |
| 210487_at    | DNTT            | -1,812418401 | -1,423348341 | -0,38907006 |  |
| 212654_at    | TPM2            | -1,812418401 | -1,423348341 | -0,38907006 |  |
| 213245_at    | ADCY1           | -1,812418401 | -1,423348341 | -0,38907006 |  |
| 213430_at    | RUFY3           | -1,812418401 | -1,423348341 | -0,38907006 |  |
| 213759_at    | ARL4C           | -1,812418401 | -1,423348341 | -0,38907006 |  |
| 220899_at    | -               | -1,812418401 | -1,423348341 | -0,38907006 |  |
| 222739_at    | TMEM62          | -1,812418401 | -1,423348341 | -0,38907006 |  |
| 230857_s_at  | ZNF497          | -1,812418401 | -1,423348341 | -0,38907006 |  |
| 233284_at    | -               | -1,812418401 | -1,423348341 | -0,38907006 |  |
| 233949_s_at  | MYH7B           | -1,812418401 | -1,423348341 | -0,38907006 |  |
| 236396_at    | -               | -1,812418401 | -1,423348341 | -0,38907006 |  |
| 237665_at    | -               | -1,812418401 | -1,423348341 | -0,38907006 |  |
| 238385_at    | C6orf58         | -1,812418401 | -1,423348341 | -0,38907006 |  |
| 242093_at    | SYTL5           | -1,812418401 | -1,423348341 | -0,38907006 |  |
| 243608_at    | COG2            | -1,812418401 | -1,423348341 | -0,38907006 |  |
| 206118_at    | STAT4           | -0,67289328  | -0,283667828 | -0,38922545 |  |
| 207064_s_at  | AOC2            | -0,67289328  | -0,283667828 | -0,38922545 |  |
| 234611_at    | LGALS8-AS1      | -0,67289328  | -0,283667828 | -0,38922545 |  |
| 241202_at    | -               | -0,67289328  | -0,283667828 | -0,38922545 |  |
| 241613_at    | -               | -0,67289328  | -0,283667828 | -0,38922545 |  |
| 1569065_s_at | C15orf62        | -0,85085127  | -0,461594427 | -0,38925684 |  |
| 1569724_at   | -               | -0,85085127  | -0,461594427 | -0,38925684 |  |
| 207096_at    | SAA2-SAA4 /// S | -0,85085127  | -0,461594427 | -0,38925684 |  |
| 207330_at    | PZP             | -0,85085127  | -0,461594427 | -0,38925684 |  |
| 228552_s_at  | ISYNA1          | -0,85085127  | -0,461594427 | -0,38925684 |  |
| 231263_at    | ARMC12          | -0,85085127  | -0,461594427 | -0,38925684 |  |
| 237497_at    | -               | -0,85085127  | -0,461594427 | -0,38925684 |  |
| 1552887_at   | TBATA           | -1,399512875 | -1,010192375 | -0,3893205  |  |
| 1553284_s_at | LMLN            | -1,399512875 | -1,010192375 | -0,3893205  |  |
| 1560862_at   | -               | -1,399512875 | -1,010192375 | -0,3893205  |  |
| 1562612_at   | -               | -1,399512875 | -1,010192375 | -0,3893205  |  |
| 1569828_at   | -               | -1,399512875 | -1,010192375 | -0,3893205  |  |
| 206658_at    | UPK3B           | -1,399512875 | -1,010192375 | -0,3893205  |  |
| 206696_at    | GPR143          | -1,399512875 | -1,010192375 | -0,3893205  |  |
| 215053_at    | SRCAP           | -1,399512875 | -1,010192375 | -0,3893205  |  |
| 215650_at    | -               | -1,399512875 | -1,010192375 | -0,3893205  |  |
| 216491_x_at  | IGHM            | -1,399512875 | -1,010192375 | -0,3893205  |  |
| 216760_at    | HRASLS2         | -1,399512875 | -1,010192375 | -0,3893205  |  |
| 220445_s_at  | CSAG2 /// CSAG  | -1,399512875 | -1,010192375 | -0,3893205  |  |
| 221148_at    | -               | -1,399512875 | -1,010192375 | -0,3893205  |  |
| 238884_at    | -               | -1,399512875 | -1,010192375 | -0,3893205  |  |
| 239814_at    | LOC100506860    | -1,399512875 | -1,010192375 | -0,3893205  |  |
| 241343_at    | RNASEH1         | -1,399512875 | -1,010192375 | -0,3893205  |  |
| 242301_at    | CBLN2           | -1,399512875 | -1,010192375 | -0,3893205  |  |
| 243675_at    | -               | -1,399512875 | -1,010192375 | -0,3893205  |  |
| 1558837_a_at | -               | 2,003776245  | 2,39311332   | -0,38933707 |  |
| 215462_at    | PLK3            | 0,20027154   | 0,589657387  | -0,38938585 |  |
| 241370_at    | LOC286052       | 0,20027154   | 0,589657387  | -0,38938585 |  |
| 242039_at    | ARAP1           | 0,20027154   | 0,589657387  | -0,38938585 |  |
| 206807_s_at  | ADD2            | 0,334552598  | 0,724100169  | -0,38954757 |  |
| 233411_at    | -               | 0,334552598  | 0,724100169  | -0,38954757 |  |

|              |                 |              |              |             |  |
|--------------|-----------------|--------------|--------------|-------------|--|
| 237398_at    | -               | 0,334552598  | 0,724100169  | -0,38954757 |  |
| 241733_at    | C18orf54        | 0,334552598  | 0,724100169  | -0,38954757 |  |
| 212778_at    | PACS2           | 0,457392764  | 0,847075464  | -0,3896827  |  |
| 229453_at    | PDIA3           | 0,457392764  | 0,847075464  | -0,3896827  |  |
| 241997_at    | -               | 0,457392764  | 0,847075464  | -0,3896827  |  |
| 205642_at    | CNTRL           | 0,57058931   | 0,960386719  | -0,38979741 |  |
| 1558111_at   | MBNL1           | 0,67554678   | 1,065442793  | -0,38989601 |  |
| 206477_s_at  | NOVA2           | 0,67554678   | 1,065442793  | -0,38989601 |  |
| 220059_at    | STAP1           | 1,153678675  | 1,543943227  | -0,39026455 |  |
| 233487_s_at  | LRRC8A          | 1,224581536  | 1,614891062  | -0,39030953 |  |
| 204554_at    | PPP1R3D         | 1,251994932  | 1,642321262  | -0,39032633 |  |
| 1556128_a_at | RASGRF2         | -0,926850548 | -0,536087151 | -0,3907634  |  |
| 214456_x_at  | SAA1 /// SAA2   | -0,926850548 | -0,536087151 | -0,3907634  |  |
| 214623_at    | FBXW4P1         | -0,926850548 | -0,536087151 | -0,3907634  |  |
| 242368_at    | -               | -0,926850548 | -0,536087151 | -0,3907634  |  |
| 224780_at    | RBM17           | 2,051361651  | 2,442710777  | -0,39134913 |  |
| 212235_at    | PLXND1          | 1,649074067  | 2,040470494  | -0,39139643 |  |
| 223135_s_at  | BBX             | 1,575032557  | 1,966439221  | -0,39140666 |  |
| 242476_at    | -               | 1,496984567  | 1,888402606  | -0,39141804 |  |
| 227975_at    | GPRIN1          | -0,43775896  | -0,046302147 | -0,39145681 |  |
| 219956_at    | GALNT6          | 0,541261317  | 0,932882274  | -0,39162096 |  |
| 204334_at    | KLF7            | 0,425644434  | 0,817300337  | -0,3916559  |  |
| 217358_at    | DNAJC16         | 0,103263601  | 0,495031851  | -0,39176825 |  |
| 1567274_at   | -               | -0,234278768 | 0,157549243  | -0,39182801 |  |
| 214758_at    | DCAF4           | -0,234278768 | 0,157549243  | -0,39182801 |  |
| 229677_at    | SLC39A3         | -0,234278768 | 0,157549243  | -0,39182801 |  |
| 243453_at    | -               | -0,234278768 | 0,157549243  | -0,39182801 |  |
| 243609_at    | CYP3A7 /// CYP3 | -0,234278768 | 0,157549243  | -0,39182801 |  |
| 1563706_at   | -               | -0,741668563 | -0,34958478  | -0,39208378 |  |
| 205783_at    | KLK13           | -0,741668563 | -0,34958478  | -0,39208378 |  |
| 220372_at    | DNAJC28         | -0,741668563 | -0,34958478  | -0,39208378 |  |
| 232919_at    | -               | -0,741668563 | -0,34958478  | -0,39208378 |  |
| 236398_s_at  | -               | -0,741668563 | -0,34958478  | -0,39208378 |  |
| 224863_at    | GNAQ            | 1,706348269  | 2,098562556  | -0,39221429 |  |
| 1554533_at   | C2              | -3,013665402 | -2,621331989 | -0,39233341 |  |
| 1555199_at   | GOSR1           | -3,013665402 | -2,621331989 | -0,39233341 |  |
| 1556486_at   | -               | -3,013665402 | -2,621331989 | -0,39233341 |  |
| 1558778_s_at | MKL2            | -3,013665402 | -2,621331989 | -0,39233341 |  |
| 1561129_at   | -               | -3,013665402 | -2,621331989 | -0,39233341 |  |
| 1563083_s_at | LINC00486       | -3,013665402 | -2,621331989 | -0,39233341 |  |
| 1570176_at   | -               | -3,013665402 | -2,621331989 | -0,39233341 |  |
| 207175_at    | ADIPOQ          | -3,013665402 | -2,621331989 | -0,39233341 |  |
| 217084_at    | IGHA1 /// IGHG1 | -3,013665402 | -2,621331989 | -0,39233341 |  |
| 217470_at    | -               | -3,013665402 | -2,621331989 | -0,39233341 |  |
| 219970_at    | GIPC2           | -3,013665402 | -2,621331989 | -0,39233341 |  |
| 220799_at    | GCM2            | -3,013665402 | -2,621331989 | -0,39233341 |  |
| 237723_at    | -               | -3,013665402 | -2,621331989 | -0,39233341 |  |
| 243221_at    | FAM20A          | -3,013665402 | -2,621331989 | -0,39233341 |  |
| 218077_s_at  | ZDHHC3          | 1,481627361  | 1,874012195  | -0,39238483 |  |
| 225206_s_at  | MTRF1L          | 2,151803104  | 2,544354523  | -0,39255142 |  |
| 1553390_at   | ATG9B           | -2,479842156 | -2,086984744 | -0,39285741 |  |
| 1553497_at   | LINC00615       | -2,479842156 | -2,086984744 | -0,39285741 |  |
| 1554638_at   | ZFYVE16         | -2,479842156 | -2,086984744 | -0,39285741 |  |
| 1559239_s_at | ACAT1           | -2,479842156 | -2,086984744 | -0,39285741 |  |
| 1565921_a_at | -               | -2,479842156 | -2,086984744 | -0,39285741 |  |
| 206489_s_at  | DLGAP1          | -2,479842156 | -2,086984744 | -0,39285741 |  |

|              |                  |              |              |             |  |
|--------------|------------------|--------------|--------------|-------------|--|
| 208077_at    | C9orf38          | -2,479842156 | -2,086984744 | -0,39285741 |  |
| 215769_at    | YME1L1           | -2,479842156 | -2,086984744 | -0,39285741 |  |
| 216735_x_at  | -                | -2,479842156 | -2,086984744 | -0,39285741 |  |
| 217557_s_at  | CPM              | -2,479842156 | -2,086984744 | -0,39285741 |  |
| 220436_at    | LOC441402        | -2,479842156 | -2,086984744 | -0,39285741 |  |
| 220717_at    | ADAMTS20         | -2,479842156 | -2,086984744 | -0,39285741 |  |
| 235373_at    | LOC100506314     | -2,479842156 | -2,086984744 | -0,39285741 |  |
| 241275_at    | CAPZA1           | -2,479842156 | -2,086984744 | -0,39285741 |  |
| 243466_at    | -                | -2,479842156 | -2,086984744 | -0,39285741 |  |
| 220071_x_at  | HAUS2            | 2,535098095  | 2,928263672  | -0,39316558 |  |
| 210138_at    | RGS20            | 3,446146386  | 3,839380885  | -0,3932345  |  |
| 226245_at    | KCTD1            | 0,661985843  | 1,055274826  | -0,39328898 |  |
| 241303_x_at  | -                | 1,46610492   | 1,859476797  | -0,39337188 |  |
| 235758_at    | PNMA6A /// PNM   | 0,555999837  | 0,949447784  | -0,39344795 |  |
| 232889_at    | -                | 2,864529541  | 3,258033502  | -0,39350396 |  |
| 1552400_a_at | C15orf27         | -1,888254346 | -1,494668682 | -0,39358566 |  |
| 1566003_x_at | -                | -1,888254346 | -1,494668682 | -0,39358566 |  |
| 208475_at    | FRMD4A           | -1,888254346 | -1,494668682 | -0,39358566 |  |
| 219944_at    | CLIP4            | -1,888254346 | -1,494668682 | -0,39358566 |  |
| 231519_at    | -                | -1,888254346 | -1,494668682 | -0,39358566 |  |
| 235682_s_at  | HSPB7            | -1,888254346 | -1,494668682 | -0,39358566 |  |
| 236511_at    | -                | -1,888254346 | -1,494668682 | -0,39358566 |  |
| 238968_at    | -                | -1,888254346 | -1,494668682 | -0,39358566 |  |
| 241513_at    | -                | -1,888254346 | -1,494668682 | -0,39358566 |  |
| 243438_at    | PDE7B            | -1,888254346 | -1,494668682 | -0,39358566 |  |
| 244199_at    | TWF1             | -1,888254346 | -1,494668682 | -0,39358566 |  |
| 215019_x_at  | ZNF528           | 0,44160593   | 0,835239052  | -0,39363312 |  |
| 228986_at    | OSBPL8           | 1,238353345  | 1,632095957  | -0,39374261 |  |
| 218825_at    | EGFL7            | 1,168140757  | 1,562009954  | -0,3938692  |  |
| 214808_at    | -                | 0,209623097  | 0,603679647  | -0,39405655 |  |
| 227404_s_at  | LOC100653132     | 3,859508144  | 4,253719424  | -0,39421128 |  |
| 211515_s_at  | DSTYK            | 0,123193849  | 0,51742585   | -0,394232   |  |
| 219421_at    | TTC33            | 1,485482016  | 1,879785595  | -0,39430358 |  |
| 1557680_at   | SAMD15           | -0,59053611  | -0,19610998  | -0,39442613 |  |
| 211096_at    | PBX2             | -0,59053611  | -0,19610998  | -0,39442613 |  |
| 212494_at    | TENC1            | -0,59053611  | -0,19610998  | -0,39442613 |  |
| 216492_at    | KIR3DX1          | -0,59053611  | -0,19610998  | -0,39442613 |  |
| 239247_at    | -                | -0,59053611  | -0,19610998  | -0,39442613 |  |
| 227047_x_at  | ZBTB4            | 1,426552034  | 1,820984782  | -0,39443275 |  |
| 222492_at    | PDXK             | 2,352981171  | 2,747463672  | -0,3944825  |  |
| 213364_s_at  | SNX1             | 1,764611101  | 2,159161028  | -0,39454993 |  |
| 223095_at    | MARVELD1         | 2,294858597  | 2,689475799  | -0,3946172  |  |
| 201880_at    | ARIH1            | 3,095191939  | 3,489929688  | -0,39473775 |  |
| 234039_at    | TANC1            | -0,172274514 | 0,222599095  | -0,39487361 |  |
| 236022_at    | MYO19            | -0,172274514 | 0,222599095  | -0,39487361 |  |
| 1555294_a_at | ERC1             | -0,496991414 | -0,102100538 | -0,39489088 |  |
| 1558391_s_at | ZNF599           | -0,496991414 | -0,102100538 | -0,39489088 |  |
| 216325_x_at  | RTEL1 /// RTEL1  | -0,496991414 | -0,102100538 | -0,39489088 |  |
| 224174_at    | TTY11            | -0,496991414 | -0,102100538 | -0,39489088 |  |
| 244500_s_at  | EVI5L            | -0,496991414 | -0,102100538 | -0,39489088 |  |
| 244841_at    | SEC24A           | -0,496991414 | -0,102100538 | -0,39489088 |  |
| 38398_at     | MADD             | 2,167484104  | 2,562416132  | -0,39493203 |  |
| 1554141_s_at | WDR78            | -2,43257096  | -2,037551727 | -0,39501923 |  |
| 1558123_at   | FLJ35390 /// LOC | -2,43257096  | -2,037551727 | -0,39501923 |  |
| 1561576_a_at | -                | -2,43257096  | -2,037551727 | -0,39501923 |  |
| 1564049_at   | LOC339593        | -2,43257096  | -2,037551727 | -0,39501923 |  |

|              |                  |              |              |             |  |
|--------------|------------------|--------------|--------------|-------------|--|
| 204737_s_at  | MYH6 /// MYH7    | -2,43257096  | -2,037551727 | -0,39501923 |  |
| 208522_s_at  | PTCH1            | -2,43257096  | -2,037551727 | -0,39501923 |  |
| 215915_at    | GULP1            | -2,43257096  | -2,037551727 | -0,39501923 |  |
| 223660_at    | ADORA3           | -2,43257096  | -2,037551727 | -0,39501923 |  |
| 231155_at    | DEFB119          | -2,43257096  | -2,037551727 | -0,39501923 |  |
| 231478_at    | PDE4C            | -2,43257096  | -2,037551727 | -0,39501923 |  |
| 232404_at    | SHROOM4          | -2,43257096  | -2,037551727 | -0,39501923 |  |
| 234603_at    | -                | -2,43257096  | -2,037551727 | -0,39501923 |  |
| 237935_at    | -                | -2,43257096  | -2,037551727 | -0,39501923 |  |
| 241459_at    | -                | -2,43257096  | -2,037551727 | -0,39501923 |  |
| 244313_at    | CR1              | -2,43257096  | -2,037551727 | -0,39501923 |  |
| 221342_at    | C6orf25          | -0,285837228 | 0,109221392  | -0,39505862 |  |
| 233354_at    | -                | -0,285837228 | 0,109221392  | -0,39505862 |  |
| 235555_at    | -                | -0,285837228 | 0,109221392  | -0,39505862 |  |
| 241999_at    | SFXN5            | -0,285837228 | 0,109221392  | -0,39505862 |  |
| 211186_s_at  | AAK1             | -0,366776884 | 0,028364014  | -0,3951409  |  |
| 238265_x_at  | -                | -0,366776884 | 0,028364014  | -0,3951409  |  |
| 206093_x_at  | TNXA /// TNXB    | 0,480753764  | 0,876248481  | -0,39549472 |  |
| 227501_at    | -                | 1,348276312  | 1,743944487  | -0,39566818 |  |
| 1556165_at   | -                | -1,937711681 | -1,541908042 | -0,39580364 |  |
| 1556836_at   | -                | -1,937711681 | -1,541908042 | -0,39580364 |  |
| 1560573_at   | LOC387895        | -1,937711681 | -1,541908042 | -0,39580364 |  |
| 1564670_at   | LOC100190938     | -1,937711681 | -1,541908042 | -0,39580364 |  |
| 1566538_at   | -                | -1,937711681 | -1,541908042 | -0,39580364 |  |
| 209228_x_at  | TUSC3            | -1,937711681 | -1,541908042 | -0,39580364 |  |
| 210607_at    | FLT3LG           | -1,937711681 | -1,541908042 | -0,39580364 |  |
| 210929_s_at  | AHSG             | -1,937711681 | -1,541908042 | -0,39580364 |  |
| 211532_x_at  | KIR2DS1 /// KIR2 | -1,937711681 | -1,541908042 | -0,39580364 |  |
| 219434_at    | TREM1            | -1,937711681 | -1,541908042 | -0,39580364 |  |
| 221343_at    | OR11A1           | -1,937711681 | -1,541908042 | -0,39580364 |  |
| 231382_at    | FGF18            | -1,937711681 | -1,541908042 | -0,39580364 |  |
| 232473_at    | -                | -1,937711681 | -1,541908042 | -0,39580364 |  |
| 234854_at    | MDN1             | -1,937711681 | -1,541908042 | -0,39580364 |  |
| 240579_at    | NBAS             | -1,937711681 | -1,541908042 | -0,39580364 |  |
| 240862_at    | RASGRP4          | -1,937711681 | -1,541908042 | -0,39580364 |  |
| 244265_at    | -                | -1,937711681 | -1,541908042 | -0,39580364 |  |
| 33197_at     | MYO7A            | -0,7657574   | -0,369952727 | -0,39580467 |  |
| 1554579_a_at | MYO18B           | -1,308181863 | -0,912331589 | -0,39585027 |  |
| 1569670_at   | PP12613          | -1,308181863 | -0,912331589 | -0,39585027 |  |
| 230818_at    | -                | -1,308181863 | -0,912331589 | -0,39585027 |  |
| 232794_at    | LOC153682        | -1,308181863 | -0,912331589 | -0,39585027 |  |
| 233239_at    | -                | -1,308181863 | -0,912331589 | -0,39585027 |  |
| 236584_at    | C1orf86          | -1,308181863 | -0,912331589 | -0,39585027 |  |
| 238976_at    | -                | -1,308181863 | -0,912331589 | -0,39585027 |  |
| 240917_at    | LOC100506430     | -1,308181863 | -0,912331589 | -0,39585027 |  |
| 244074_at    | LOC100129104     | -1,308181863 | -0,912331589 | -0,39585027 |  |
| 244627_at    | DAK              | -1,308181863 | -0,912331589 | -0,39585027 |  |
| 218476_at    | POMT1            | 0,359971644  | 0,755840599  | -0,39586896 |  |
| 213097_s_at  | DNAJC2           | 4,114752306  | 4,51064824   | -0,39589593 |  |
| 225569_at    | EIF2C2 /// LOC28 | 2,546213279  | 2,942125533  | -0,39591225 |  |
| 227204_at    | PARD6G           | 1,269985355  | 1,665902186  | -0,39591683 |  |
| 227907_at    | -                | 1,269985355  | 1,665902186  | -0,39591683 |  |
| 233917_s_at  | MOV10            | 0,30867765   | 0,704715219  | -0,39603757 |  |
| 238863_x_at  | COG8             | 0,30867765   | 0,704715219  | -0,39603757 |  |
| 244687_at    | DBT              | 0,30867765   | 0,704715219  | -0,39603757 |  |
| 231207_at    | -                | 0,228146222  | 0,624460759  | -0,39631454 |  |

|              |                  |              |              |             |  |
|--------------|------------------|--------------|--------------|-------------|--|
| 217579_x_at  | -                | 1,129248302  | 1,525647381  | -0,39639908 |  |
| 204832_s_at  | BMPRI1A          | 0,171847695  | 0,568365095  | -0,3965174  |  |
| 229351_at    | -                | 1,649074067  | 2,045615873  | -0,39654181 |  |
| 211383_s_at  | WDR37            | 2,470441349  | 2,867091644  | -0,3966503  |  |
| 206922_at    | VCY /// VCY1B    | 0,083054335  | 0,479907041  | -0,39685271 |  |
| 228146_at    | C17orf51 /// FAM | 0,083054335  | 0,479907041  | -0,39685271 |  |
| 207327_at    | EYA4             | 1,774096855  | 2,170981159  | -0,3968843  |  |
| 223243_s_at  | EDEM3            | 1,305306849  | 1,702196344  | -0,39688949 |  |
| 226994_at    | DNAJA2           | 3,025418883  | 3,42231092   | -0,39689204 |  |
| 227330_x_at  | LOC100233156 /   | 2,38635068   | 2,783327323  | -0,39697664 |  |
| 211740_at    | ICA1             | -3,287237186 | -2,89013181  | -0,39710538 |  |
| 1561250_at   | -                | -2,972500237 | -2,575129729 | -0,39737051 |  |
| 1562358_at   | -                | -2,972500237 | -2,575129729 | -0,39737051 |  |
| 1563179_at   | -                | -2,972500237 | -2,575129729 | -0,39737051 |  |
| 205000_at    | DDX3Y            | -2,972500237 | -2,575129729 | -0,39737051 |  |
| 211489_at    | ADRA1A           | -2,972500237 | -2,575129729 | -0,39737051 |  |
| 220595_at    | PDZRN4           | -2,972500237 | -2,575129729 | -0,39737051 |  |
| 233034_at    | -                | -2,972500237 | -2,575129729 | -0,39737051 |  |
| 233604_at    | FLJ22763         | -2,972500237 | -2,575129729 | -0,39737051 |  |
| 234579_at    | -                | -2,972500237 | -2,575129729 | -0,39737051 |  |
| 237876_at    | -                | -2,972500237 | -2,575129729 | -0,39737051 |  |
| 237938_at    | -                | -2,972500237 | -2,575129729 | -0,39737051 |  |
| 240946_at    | -                | -2,972500237 | -2,575129729 | -0,39737051 |  |
| 244505_at    | -                | -2,972500237 | -2,575129729 | -0,39737051 |  |
| 1559739_at   | CHPT1            | -0,888496123 | -0,490927335 | -0,39756879 |  |
| 204680_s_at  | RAPGEF5          | -0,888496123 | -0,490927335 | -0,39756879 |  |
| 214839_at    | LINC00599 /// MI | -0,888496123 | -0,490927335 | -0,39756879 |  |
| 215897_at    | MED25            | -0,888496123 | -0,490927335 | -0,39756879 |  |
| 220776_at    | KCNJ14           | -0,888496123 | -0,490927335 | -0,39756879 |  |
| 227279_at    | TCEAL3           | -0,888496123 | -0,490927335 | -0,39756879 |  |
| 228844_at    | SLC13A5          | -0,888496123 | -0,490927335 | -0,39756879 |  |
| 229929_at    | SPSB4            | -0,888496123 | -0,490927335 | -0,39756879 |  |
| 243695_at    | -                | -0,888496123 | -0,490927335 | -0,39756879 |  |
| 226121_at    | DHRS13           | 1,937784532  | 2,335461563  | -0,39767703 |  |
| 202803_s_at  | ITGB2            | 2,544366685  | 2,942125533  | -0,39775885 |  |
| 207996_s_at  | C18orf1          | -0,148196756 | 0,249604176  | -0,39780093 |  |
| 214339_s_at  | MAP4K1           | -0,148196756 | 0,249604176  | -0,39780093 |  |
| 220067_at    | SPTBN5           | -0,148196756 | 0,249604176  | -0,39780093 |  |
| 1563077_at   | LOC100289058     | -0,655928373 | -0,258114234 | -0,39781414 |  |
| 211572_s_at  | SLC23A2          | -0,655928373 | -0,258114234 | -0,39781414 |  |
| 221246_x_at  | TNS1             | -0,655928373 | -0,258114234 | -0,39781414 |  |
| 230912_at    | ASPDH            | -0,655928373 | -0,258114234 | -0,39781414 |  |
| 239981_x_at  | -                | -0,655928373 | -0,258114234 | -0,39781414 |  |
| 241363_at    | EXD3             | -0,655928373 | -0,258114234 | -0,39781414 |  |
| 241983_at    | PTPN2            | -0,655928373 | -0,258114234 | -0,39781414 |  |
| 1553722_s_at | RNF152           | -2,359436556 | -1,961547147 | -0,39788941 |  |
| 1561132_at   | DHX35            | -2,359436556 | -1,961547147 | -0,39788941 |  |
| 1563013_at   | LOC646522        | -2,359436556 | -1,961547147 | -0,39788941 |  |
| 1566777_at   | -                | -2,359436556 | -1,961547147 | -0,39788941 |  |
| 1566902_at   | -                | -2,359436556 | -1,961547147 | -0,39788941 |  |
| 1567008_at   | -                | -2,359436556 | -1,961547147 | -0,39788941 |  |
| 1568857_a_at | NBR1             | -2,359436556 | -1,961547147 | -0,39788941 |  |
| 1569611_a_at | IQCH             | -2,359436556 | -1,961547147 | -0,39788941 |  |
| 201109_s_at  | THBS1            | -2,359436556 | -1,961547147 | -0,39788941 |  |
| 214043_at    | PTPRD            | -2,359436556 | -1,961547147 | -0,39788941 |  |
| 215445_x_at  | -                | -2,359436556 | -1,961547147 | -0,39788941 |  |

|              |                 |              |              |             |  |
|--------------|-----------------|--------------|--------------|-------------|--|
| 216951_at    | FCGR1A          | -2,359436556 | -1,961547147 | -0,39788941 |  |
| 219771_at    | TBC1D8B         | -2,359436556 | -1,961547147 | -0,39788941 |  |
| 225054_x_at  | LOC100499466    | -2,359436556 | -1,961547147 | -0,39788941 |  |
| 226582_at    | LOC400043       | -2,359436556 | -1,961547147 | -0,39788941 |  |
| 234889_at    | -               | -2,359436556 | -1,961547147 | -0,39788941 |  |
| 241077_at    | -               | -2,359436556 | -1,961547147 | -0,39788941 |  |
| 212188_at    | KCTD12          | -0,221656139 | 0,176436073  | -0,39809221 |  |
| 228260_at    | ELAVL2          | -0,221656139 | 0,176436073  | -0,39809221 |  |
| 240612_at    | -               | -0,221656139 | 0,176436073  | -0,39809221 |  |
| 202555_s_at  | MYLK            | 1,481627361  | 1,879785595  | -0,39815823 |  |
| 244268_x_at  | LOC646214       | 1,422536444  | 1,820984782  | -0,39844834 |  |
| 1552991_at   | OR5P2           | -2,01371626  | -1,615132408 | -0,39858385 |  |
| 1557790_at   | JRKL            | -2,01371626  | -1,615132408 | -0,39858385 |  |
| 1560912_at   | LOC389043       | -2,01371626  | -1,615132408 | -0,39858385 |  |
| 1561622_at   | -               | -2,01371626  | -1,615132408 | -0,39858385 |  |
| 1562878_at   | -               | -2,01371626  | -1,615132408 | -0,39858385 |  |
| 206221_at    | RASA3           | -2,01371626  | -1,615132408 | -0,39858385 |  |
| 207978_s_at  | NR4A3           | -2,01371626  | -1,615132408 | -0,39858385 |  |
| 230892_at    | -               | -2,01371626  | -1,615132408 | -0,39858385 |  |
| 231616_at    | -               | -2,01371626  | -1,615132408 | -0,39858385 |  |
| 232636_at    | SLITRK4         | -2,01371626  | -1,615132408 | -0,39858385 |  |
| 234193_at    | -               | -2,01371626  | -1,615132408 | -0,39858385 |  |
| 238031_at    | -               | -2,01371626  | -1,615132408 | -0,39858385 |  |
| 238463_at    | -               | -2,01371626  | -1,615132408 | -0,39858385 |  |
| 239690_at    | -               | -2,01371626  | -1,615132408 | -0,39858385 |  |
| 242275_at    | -               | -2,01371626  | -1,615132408 | -0,39858385 |  |
| 242917_at    | RASGEF1A        | -2,01371626  | -1,615132408 | -0,39858385 |  |
| 243371_at    | -               | -2,01371626  | -1,615132408 | -0,39858385 |  |
| 230650_at    | -               | 0,917308734  | 1,315948728  | -0,39863999 |  |
| 235145_at    | ZBTB7B          | 0,917308734  | 1,315948728  | -0,39863999 |  |
| 207591_s_at  | ARID1A          | -0,423248115 | -0,024572586 | -0,39867553 |  |
| 214094_at    | FUBP1           | -0,423248115 | -0,024572586 | -0,39867553 |  |
| 242030_at    | -               | -0,423248115 | -0,024572586 | -0,39867553 |  |
| 217999_s_at  | PHLDA1          | 0,57782909   | 0,976641161  | -0,39881207 |  |
| 221740_x_at  | LOC100653329    | 0,57782909   | 0,976641161  | -0,39881207 |  |
| 221956_at    | LRCH4           | 0,882651021  | 1,281471383  | -0,39882036 |  |
| 1566990_x_at | ARID1B          | 2,81177561   | 3,210719429  | -0,39894382 |  |
| 210789_x_at  | CEACAM3         | 0,533835206  | 0,932882274  | -0,39904707 |  |
| 207292_s_at  | MAPK7           | 1,089278259  | 1,488344553  | -0,39906629 |  |
| 64942_at     | GPR153          | 1,732533761  | 2,131601487  | -0,39906773 |  |
| 231643_s_at  | -               | 0,133056859  | 0,532164371  | -0,39910751 |  |
| 1556388_a_at | LOC100507389    | -2,311268652 | -1,912089812 | -0,39917884 |  |
| 1557805_at   | -               | -2,311268652 | -1,912089812 | -0,39917884 |  |
| 1559348_a_at | LOC100507568    | -2,311268652 | -1,912089812 | -0,39917884 |  |
| 1565684_at   | LOC400940       | -2,311268652 | -1,912089812 | -0,39917884 |  |
| 209614_at    | ADH1B           | -2,311268652 | -1,912089812 | -0,39917884 |  |
| 215810_x_at  | DST             | -2,311268652 | -1,912089812 | -0,39917884 |  |
| 222496_s_at  | RBM47           | -2,311268652 | -1,912089812 | -0,39917884 |  |
| 232286_at    | -               | -2,311268652 | -1,912089812 | -0,39917884 |  |
| 236826_at    | -               | -2,311268652 | -1,912089812 | -0,39917884 |  |
| 237417_at    | RCBTB1          | -2,311268652 | -1,912089812 | -0,39917884 |  |
| 237448_at    | -               | -2,311268652 | -1,912089812 | -0,39917884 |  |
| 240585_at    | -               | -2,311268652 | -1,912089812 | -0,39917884 |  |
| 242638_at    | -               | -2,311268652 | -1,912089812 | -0,39917884 |  |
| 243354_at    | HYDIN /// HYDIN | -2,311268652 | -1,912089812 | -0,39917884 |  |
| 244302_at    | -               | -2,311268652 | -1,912089812 | -0,39917884 |  |



|              |                |              |              |             |  |
|--------------|----------------|--------------|--------------|-------------|--|
| 234572_at    | -              | 0,46522187   | 0,864649967  | -0,3994281  |  |
| 211447_s_at  | PDE4A          | 0,417596971  | 0,817300337  | -0,39970337 |  |
| 1554853_at   | CYP2U1         | -2,063149277 | -1,663414495 | -0,39973478 |  |
| 1555396_s_at | CXorf67        | -2,063149277 | -1,663414495 | -0,39973478 |  |
| 1556084_at   | HNRNPM         | -2,063149277 | -1,663414495 | -0,39973478 |  |
| 1556145_a_at | LOC100131170   | -2,063149277 | -1,663414495 | -0,39973478 |  |
| 1559360_at   | -              | -2,063149277 | -1,663414495 | -0,39973478 |  |
| 1568813_at   | LOC100506392   | -2,063149277 | -1,663414495 | -0,39973478 |  |
| 205863_at    | S100A12        | -2,063149277 | -1,663414495 | -0,39973478 |  |
| 210727_at    | CALCA          | -2,063149277 | -1,663414495 | -0,39973478 |  |
| 215456_at    | -              | -2,063149277 | -1,663414495 | -0,39973478 |  |
| 215636_at    | UBR4           | -2,063149277 | -1,663414495 | -0,39973478 |  |
| 215659_at    | GSDMB          | -2,063149277 | -1,663414495 | -0,39973478 |  |
| 221609_s_at  | WNT6           | -2,063149277 | -1,663414495 | -0,39973478 |  |
| 229048_at    | -              | -2,063149277 | -1,663414495 | -0,39973478 |  |
| 235083_at    | LOC151009      | -2,063149277 | -1,663414495 | -0,39973478 |  |
| 239254_at    | CCDC40         | -2,063149277 | -1,663414495 | -0,39973478 |  |
| 240161_s_at  | CDC20B         | -2,063149277 | -1,663414495 | -0,39973478 |  |
| 219387_at    | CCDC88A        | -0,022466681 | 0,377530647  | -0,39999733 |  |
| 235569_at    | VPS37D         | -0,022466681 | 0,377530647  | -0,39999733 |  |
| 205039_s_at  | IKZF1          | 2,107467633  | 2,507538456  | -0,40007082 |  |
| 1557811_a_at | -              | -2,262747984 | -1,862647763 | -0,40010022 |  |
| 1559731_x_at | MACROD1        | -2,262747984 | -1,862647763 | -0,40010022 |  |
| 1563934_at   | -              | -2,262747984 | -1,862647763 | -0,40010022 |  |
| 207062_at    | IAPP           | -2,262747984 | -1,862647763 | -0,40010022 |  |
| 214066_x_at  | NPR2           | -2,262747984 | -1,862647763 | -0,40010022 |  |
| 214904_at    | ZNF41          | -2,262747984 | -1,862647763 | -0,40010022 |  |
| 215409_at    | LPCAT4         | -2,262747984 | -1,862647763 | -0,40010022 |  |
| 215487_x_at  | FAM182B        | -2,262747984 | -1,862647763 | -0,40010022 |  |
| 224526_at    | LOC100132319   | -2,262747984 | -1,862647763 | -0,40010022 |  |
| 226841_at    | MPEG1          | -2,262747984 | -1,862647763 | -0,40010022 |  |
| 228891_at    | SEMA4D         | -2,262747984 | -1,862647763 | -0,40010022 |  |
| 236373_at    | -              | -2,262747984 | -1,862647763 | -0,40010022 |  |
| 239770_at    | ESYT3          | -2,262747984 | -1,862647763 | -0,40010022 |  |
| 242999_at    | ARHGEF7        | -2,262747984 | -1,862647763 | -0,40010022 |  |
| 243574_at    | -              | -2,262747984 | -1,862647763 | -0,40010022 |  |
| 202947_s_at  | GYPC           | 1,62481334   | 2,024923328  | -0,40010999 |  |
| 1567028_s_at | SH3GL1P2       | -1,131062212 | -0,730778808 | -0,4002834  |  |
| 208237_x_at  | ADAM22         | -1,131062212 | -0,730778808 | -0,4002834  |  |
| 216537_s_at  | SIGLEC7        | -1,131062212 | -0,730778808 | -0,4002834  |  |
| 221431_s_at  | OR12D3         | -1,131062212 | -0,730778808 | -0,4002834  |  |
| 221859_at    | SYT13          | -1,131062212 | -0,730778808 | -0,4002834  |  |
| 224480_s_at  | AGPAT9         | -1,131062212 | -0,730778808 | -0,4002834  |  |
| 226799_at    | FGD6           | -1,131062212 | -0,730778808 | -0,4002834  |  |
| 226856_at    | MUSTN1 /// TME | -1,131062212 | -0,730778808 | -0,4002834  |  |
| 211813_x_at  | DCN            | -0,089689931 | 0,310717132  | -0,40040706 |  |
| 230334_at    | LOC100507291   | -0,089689931 | 0,310717132  | -0,40040706 |  |
| 238869_at    | -              | -0,089689931 | 0,310717132  | -0,40040706 |  |
| 244574_at    | PTPRG          | -0,089689931 | 0,310717132  | -0,40040706 |  |
| 233387_s_at  | PCNT           | 0,291166226  | 0,691645685  | -0,40047946 |  |
| 244495_x_at  | TMEM241        | 1,549482847  | 1,950068772  | -0,40058593 |  |
| 1552288_at   | CILP2          | -2,138804305 | -1,738067356 | -0,40073695 |  |
| 1553506_at   | CPO            | -2,138804305 | -1,738067356 | -0,40073695 |  |
| 1554914_at   | PLA2G4D        | -2,138804305 | -1,738067356 | -0,40073695 |  |
| 1556606_at   | NAV2           | -2,138804305 | -1,738067356 | -0,40073695 |  |
| 1565780_at   | ABCA8          | -2,138804305 | -1,738067356 | -0,40073695 |  |

|              |           |              |              |             |  |
|--------------|-----------|--------------|--------------|-------------|--|
| 156638_at    | -         | -2,138804305 | -1,738067356 | -0,40073695 |  |
| 202865_at    | DNAJB12   | -2,138804305 | -1,738067356 | -0,40073695 |  |
| 208563_x_at  | POU3F3    | -2,138804305 | -1,738067356 | -0,40073695 |  |
| 208983_s_at  | PECAM1    | -2,138804305 | -1,738067356 | -0,40073695 |  |
| 209353_s_at  | -         | -2,138804305 | -1,738067356 | -0,40073695 |  |
| 215918_s_at  | SPTBN1    | -2,138804305 | -1,738067356 | -0,40073695 |  |
| 218589_at    | LPAR6     | -2,138804305 | -1,738067356 | -0,40073695 |  |
| 221146_at    | -         | -2,138804305 | -1,738067356 | -0,40073695 |  |
| 223823_at    | KCNMB2    | -2,138804305 | -1,738067356 | -0,40073695 |  |
| 227612_at    | ELAVL3    | -2,138804305 | -1,738067356 | -0,40073695 |  |
| 231778_at    | DLX3      | -2,138804305 | -1,738067356 | -0,40073695 |  |
| 235960_at    | FXR1      | -2,138804305 | -1,738067356 | -0,40073695 |  |
| 239340_at    | -         | -2,138804305 | -1,738067356 | -0,40073695 |  |
| 240130_at    | -         | -2,138804305 | -1,738067356 | -0,40073695 |  |
| 240191_at    | ZNF543    | -2,138804305 | -1,738067356 | -0,40073695 |  |
| 240736_at    | -         | -2,138804305 | -1,738067356 | -0,40073695 |  |
| 244289_at    | ZNF300P1  | -2,138804305 | -1,738067356 | -0,40073695 |  |
| 1553371_at   | EPHA10    | -2,187914861 | -1,787089803 | -0,40082506 |  |
| 1555503_a_at | TMCC2     | -2,187914861 | -1,787089803 | -0,40082506 |  |
| 1556202_at   | SRGAP2    | -2,187914861 | -1,787089803 | -0,40082506 |  |
| 1556359_at   | C6orf89   | -2,187914861 | -1,787089803 | -0,40082506 |  |
| 1569855_at   | -         | -2,187914861 | -1,787089803 | -0,40082506 |  |
| 205529_s_at  | RUNX1T1   | -2,187914861 | -1,787089803 | -0,40082506 |  |
| 207074_s_at  | SLC18A1   | -2,187914861 | -1,787089803 | -0,40082506 |  |
| 208259_x_at  | IFNA7     | -2,187914861 | -1,787089803 | -0,40082506 |  |
| 215311_at    | NTRK3     | -2,187914861 | -1,787089803 | -0,40082506 |  |
| 215755_at    | -         | -2,187914861 | -1,787089803 | -0,40082506 |  |
| 220660_at    | LINC00474 | -2,187914861 | -1,787089803 | -0,40082506 |  |
| 228866_at    | -         | -2,187914861 | -1,787089803 | -0,40082506 |  |
| 229950_s_at  | -         | -2,187914861 | -1,787089803 | -0,40082506 |  |
| 232267_at    | GPR133    | -2,187914861 | -1,787089803 | -0,40082506 |  |
| 233969_at    | -         | -2,187914861 | -1,787089803 | -0,40082506 |  |
| 234468_at    | -         | -2,187914861 | -1,787089803 | -0,40082506 |  |
| 239509_at    | FLJ16779  | -2,187914861 | -1,787089803 | -0,40082506 |  |
| 240287_at    | IRG1      | -2,187914861 | -1,787089803 | -0,40082506 |  |
| 240659_x_at  | -         | -2,187914861 | -1,787089803 | -0,40082506 |  |
| 243776_at    | -         | -2,187914861 | -1,787089803 | -0,40082506 |  |
| 231274_s_at  | -         | 2,487840343  | 2,888726553  | -0,40088621 |  |
| 1561439_at   | -         | -1,047650486 | -0,646746079 | -0,40090441 |  |
| 206794_at    | ERBB4     | -1,047650486 | -0,646746079 | -0,40090441 |  |
| 207848_at    | AVP       | -1,047650486 | -0,646746079 | -0,40090441 |  |
| 208172_s_at  | KCNB2     | -1,047650486 | -0,646746079 | -0,40090441 |  |
| 213193_x_at  | TRBC1     | -1,047650486 | -0,646746079 | -0,40090441 |  |
| 216245_at    | IL1RN     | -1,047650486 | -0,646746079 | -0,40090441 |  |
| 233736_at    | -         | -1,047650486 | -0,646746079 | -0,40090441 |  |
| 234461_at    | RNF215    | -1,047650486 | -0,646746079 | -0,40090441 |  |
| 235525_at    | -         | -1,047650486 | -0,646746079 | -0,40090441 |  |
| 238141_s_at  | -         | -1,047650486 | -0,646746079 | -0,40090441 |  |
| 239717_at    | CHRNA10   | -1,047650486 | -0,646746079 | -0,40090441 |  |
| 242125_at    | -         | 0,767063567  | 1,16809119   | -0,40102762 |  |
| 201236_s_at  | BTG2      | 1,829737795  | 2,230931691  | -0,4011939  |  |
| 213598_at    | -         | 2,361396186  | 2,763166224  | -0,40177004 |  |
| 243966_at    | -         | 0,87091093   | 1,272721751  | -0,40181082 |  |
| 226301_at    | SLC18B1   | 2,114952142  | 2,516830926  | -0,40187878 |  |
| 236976_at    | FANCA     | 0,384950573  | 0,786897721  | -0,40194715 |  |
| 219046_s_at  | PKNOX2    | -0,394749123 | 0,007421914  | -0,40217104 |  |

|              |                 |              |              |             |  |
|--------------|-----------------|--------------|--------------|-------------|--|
| 230454_at    | ICA1L           | -0,622910612 | -0,220592223 | -0,40231839 |  |
| 231767_at    | HOXB4           | 1,751865623  | 2,154405725  | -0,4025401  |  |
| 1553558_at   | TAS2R41         | -1,353583928 | -0,950686014 | -0,40289791 |  |
| 1559714_at   | RGR             | -1,353583928 | -0,950686014 | -0,40289791 |  |
| 201468_s_at  | NQO1            | -1,353583928 | -0,950686014 | -0,40289791 |  |
| 207003_at    | GUCA2A          | -1,353583928 | -0,950686014 | -0,40289791 |  |
| 207823_s_at  | AIF1            | -1,353583928 | -0,950686014 | -0,40289791 |  |
| 207915_at    | -               | -1,353583928 | -0,950686014 | -0,40289791 |  |
| 211834_s_at  | TP63            | -1,353583928 | -0,950686014 | -0,40289791 |  |
| 216479_at    | RPL21 /// RPL21 | -1,353583928 | -0,950686014 | -0,40289791 |  |
| 217490_at    | -               | -1,353583928 | -0,950686014 | -0,40289791 |  |
| 236527_at    | ATP6V0E1        | -1,353583928 | -0,950686014 | -0,40289791 |  |
| 241395_at    | NIT1            | -1,353583928 | -0,950686014 | -0,40289791 |  |
| 242326_at    | COL22A1         | -1,353583928 | -0,950686014 | -0,40289791 |  |
| 242350_s_at  | LOC100128098    | -1,353583928 | -0,950686014 | -0,40289791 |  |
| 243094_at    | -               | -1,353583928 | -0,950686014 | -0,40289791 |  |
| 210090_at    | ARC             | 0,255492549  | 0,658444279  | -0,40295173 |  |
| 212545_s_at  | ZHX3            | 0,255492549  | 0,658444279  | -0,40295173 |  |
| 1558489_at   | -               | -3,250025915 | -2,847001814 | -0,4030241  |  |
| 1565131_x_at | MAP3K2          | -3,250025915 | -2,847001814 | -0,4030241  |  |
| 239210_at    | -               | -3,250025915 | -2,847001814 | -0,4030241  |  |
| 241291_at    | LOC100505776    | -3,250025915 | -2,847001814 | -0,4030241  |  |
| 210377_at    | ACSM3           | 1,621313976  | 2,024923328  | -0,40360935 |  |
| 205146_x_at  | APBA3           | -0,136301282 | 0,26733076   | -0,40363204 |  |
| 239432_at    | FLJ31306        | -0,136301282 | 0,26733076   | -0,40363204 |  |
| 210482_x_at  | MAP2K5          | 0,401366113  | 0,805216064  | -0,40384995 |  |
| 223388_s_at  | ZFYVE1          | 1,114389003  | 1,518263577  | -0,40387457 |  |
| 211277_x_at  | APP             | 0,945567441  | 1,349621332  | -0,40405389 |  |
| 221839_s_at  | UBAP2           | 3,237986416  | 3,642048499  | -0,40406208 |  |
| 215705_at    | PPP5C           | 0,351548291  | 0,755840599  | -0,40429231 |  |
| 225146_at    | FAM219A         | 0,555999837  | 0,960386719  | -0,40438688 |  |
| 206283_s_at  | TAL1            | 2,915422315  | 3,319860027  | -0,40443771 |  |
| 216699_s_at  | KLK1            | 0,052199481  | 0,456918297  | -0,40471882 |  |
| 204781_s_at  | FAS             | -0,79540287  | -0,39061235  | -0,40479052 |  |
| 205804_s_at  | TRAF3IP3        | -0,79540287  | -0,39061235  | -0,40479052 |  |
| 206498_at    | OCA2            | -0,79540287  | -0,39061235  | -0,40479052 |  |
| 219508_at    | GCNT3           | -0,79540287  | -0,39061235  | -0,40479052 |  |
| 221990_at    | PAX8            | -0,79540287  | -0,39061235  | -0,40479052 |  |
| 224882_at    | ACSS1           | -0,79540287  | -0,39061235  | -0,40479052 |  |
| 236149_at    | -               | -0,79540287  | -0,39061235  | -0,40479052 |  |
| 238000_at    | -               | -0,79540287  | -0,39061235  | -0,40479052 |  |
| 239799_at    | LINC00476       | -0,79540287  | -0,39061235  | -0,40479052 |  |
| 1552880_at   | SEC16B          | -2,908843709 | -2,503677622 | -0,40516609 |  |
| 1554225_a_at | -               | -2,908843709 | -2,503677622 | -0,40516609 |  |
| 1554473_at   | SRGAP1          | -2,908843709 | -2,503677622 | -0,40516609 |  |
| 1555527_at   | COL9A1          | -2,908843709 | -2,503677622 | -0,40516609 |  |
| 1556516_at   | -               | -2,908843709 | -2,503677622 | -0,40516609 |  |
| 1559663_at   | -               | -2,908843709 | -2,503677622 | -0,40516609 |  |
| 1561432_at   | -               | -2,908843709 | -2,503677622 | -0,40516609 |  |
| 1562492_at   | LOC340090       | -2,908843709 | -2,503677622 | -0,40516609 |  |
| 206355_at    | GNAL            | -2,908843709 | -2,503677622 | -0,40516609 |  |
| 210893_at    | -               | -2,908843709 | -2,503677622 | -0,40516609 |  |
| 215565_at    | -               | -2,908843709 | -2,503677622 | -0,40516609 |  |
| 217574_at    | CDH8            | -2,908843709 | -2,503677622 | -0,40516609 |  |
| 219285_s_at  | NIN             | -2,908843709 | -2,503677622 | -0,40516609 |  |
| 237150_at    | -               | -2,908843709 | -2,503677622 | -0,40516609 |  |

|             |                |              |              |             |  |
|-------------|----------------|--------------|--------------|-------------|--|
| 237966_at   | -              | -2,908843709 | -2,503677622 | -0,40516609 |  |
| 241903_at   | -              | -2,908843709 | -2,503677622 | -0,40516609 |  |
| 243346_at   | LMOD3          | -2,908843709 | -2,503677622 | -0,40516609 |  |
| 206216_at   | SRPK3          | -0,325749314 | 0,079428135  | -0,40517745 |  |
| 1553013_at  | CNTNAP5        | -1,518072576 | -1,112851844 | -0,40522073 |  |
| 1560017_at  | TMTC3          | -1,518072576 | -1,112851844 | -0,40522073 |  |
| 1564248_at  | -              | -1,518072576 | -1,112851844 | -0,40522073 |  |
| 1566622_at  | -              | -1,518072576 | -1,112851844 | -0,40522073 |  |
| 208487_at   | LMX1B          | -1,518072576 | -1,112851844 | -0,40522073 |  |
| 210631_at   | NF1            | -1,518072576 | -1,112851844 | -0,40522073 |  |
| 222315_at   | -              | -1,518072576 | -1,112851844 | -0,40522073 |  |
| 224536_s_at | PCDHGC3 /// PC | -1,518072576 | -1,112851844 | -0,40522073 |  |
| 236480_at   | MIR210HG       | -1,518072576 | -1,112851844 | -0,40522073 |  |
| 241376_at   | -              | -1,518072576 | -1,112851844 | -0,40522073 |  |
| 242659_at   | -              | -1,518072576 | -1,112851844 | -0,40522073 |  |
| 244055_at   | -              | -1,518072576 | -1,112851844 | -0,40522073 |  |
| 236569_at   | -              | 0,44160593   | 0,847075464  | -0,40546953 |  |
| 225976_at   | BTF3L4         | 3,475514766  | 3,880994209  | -0,40547944 |  |
| 236545_at   | -              | 1,191926657  | 1,59747851   | -0,40555185 |  |
| 222779_s_at | C17orf85       | 1,296557217  | 1,702196344  | -0,40563913 |  |
| 219191_s_at | BIN2           | 1,897847661  | 2,303602088  | -0,40575443 |  |
| 235702_at   | -              | 0,747935635  | 1,153866761  | -0,40593113 |  |
| 201996_s_at | SPEN           | 2,901063789  | 3,307062282  | -0,40599849 |  |
| 203520_s_at | ZNF318         | 1,119359127  | 1,525647381  | -0,40628825 |  |
| 221677_s_at | DONSON         | 3,034656185  | 3,440980183  | -0,406324   |  |
| 1554873_at  | CSPP1          | -0,112808516 | 0,293518836  | -0,40632735 |  |
| 209367_at   | STXBP2         | -0,112808516 | 0,293518836  | -0,40632735 |  |
| 233753_at   | SCAF4          | -0,112808516 | 0,293518836  | -0,40632735 |  |
| 1565689_at  | -              | -0,543051993 | -0,136643983 | -0,40640801 |  |
| 213900_at   | FAM189A2       | -0,543051993 | -0,136643983 | -0,40640801 |  |
| 214673_s_at | HUWE1          | -0,543051993 | -0,136643983 | -0,40640801 |  |
| 217626_at   | AKR1C1         | -0,543051993 | -0,136643983 | -0,40640801 |  |
| 222132_s_at | AGK            | 3,363729238  | 3,770352811  | -0,40662357 |  |
| 213778_x_at | ZNF276         | 0,317354302  | 0,724100169  | -0,40674587 |  |
| 227420_at   | TNFAIP8L1      | 1,481627361  | 1,888402606  | -0,40677524 |  |
| 1560621_at  | -              | 0,072842263  | 0,479907041  | -0,40706478 |  |
| 213116_at   | NEK3           | 0,072842263  | 0,479907041  | -0,40706478 |  |
| 229010_at   | CBL            | 0,072842263  | 0,479907041  | -0,40706478 |  |
| 219126_at   | PHF10          | 2,420979937  | 2,828804976  | -0,40782504 |  |
| 206120_at   | CD33           | 0,962260738  | 1,370274469  | -0,40801373 |  |
| 227707_at   | MYLIP          | 0,541261317  | 0,949447784  | -0,40818647 |  |
| 1556737_at  | LOC388387      | -0,299034815 | 0,109221392  | -0,40825621 |  |
| 1557774_at  | -              | -0,299034815 | 0,109221392  | -0,40825621 |  |
| 207748_at   | -              | -0,299034815 | 0,109221392  | -0,40825621 |  |
| 219358_s_at | ADAP2          | -0,299034815 | 0,109221392  | -0,40825621 |  |
| 229913_at   | C7orf61        | -0,299034815 | 0,109221392  | -0,40825621 |  |
| 235372_at   | FCRLA          | -0,299034815 | 0,109221392  | -0,40825621 |  |
| 1564165_at  | LOC100630923   | -1,173767127 | -0,765504029 | -0,4082631  |  |
| 204363_at   | F3             | -1,173767127 | -0,765504029 | -0,4082631  |  |
| 206391_at   | RARRES1        | -1,173767127 | -0,765504029 | -0,4082631  |  |
| 206454_s_at | RHO            | -1,173767127 | -0,765504029 | -0,4082631  |  |
| 216261_at   | ITGB3          | -1,173767127 | -0,765504029 | -0,4082631  |  |
| 219794_at   | VPS53          | -1,173767127 | -0,765504029 | -0,4082631  |  |
| 228246_s_at | SPTBN1         | -1,173767127 | -0,765504029 | -0,4082631  |  |
| 240260_at   | -              | -1,173767127 | -0,765504029 | -0,4082631  |  |
| 240321_at   | -              | -1,173767127 | -0,765504029 | -0,4082631  |  |

|              |                |              |              |             |  |
|--------------|----------------|--------------|--------------|-------------|--|
| 241901_at    | -              | -1,173767127 | -0,765504029 | -0,4082631  |  |
| 235320_at    | ARL6           | 0,682279745  | 1,090553537  | -0,40827379 |  |
| 203773_x_at  | BLVRA          | 2,089851283  | 2,498185745  | -0,40833446 |  |
| 241467_at    | -              | 0,359971644  | 0,768343791  | -0,40837215 |  |
| 230494_at    | SLC20A1        | 3,231115193  | 3,639498476  | -0,40838328 |  |
| 229715_at    | B7H6           | -0,055687482 | 0,352836757  | -0,40852424 |  |
| 229890_at    | LOC100507547 / | -0,055687482 | 0,352836757  | -0,40852424 |  |
| 243295_at    | RBM27          | 1,485482016  | 1,894118818  | -0,4086368  |  |
| 237158_s_at  | MPHOSPH9       | 0,123193849  | 0,532164371  | -0,40897052 |  |
| 239117_at    | -              | 0,123193849  | 0,532164371  | -0,40897052 |  |
| 1565729_at   | -              | -1,089016378 | -0,679763839 | -0,40925254 |  |
| 205185_at    | SPINK5         | -1,089016378 | -0,679763839 | -0,40925254 |  |
| 205599_at    | TRAF1          | -1,089016378 | -0,679763839 | -0,40925254 |  |
| 207013_s_at  | MMP16          | -1,089016378 | -0,679763839 | -0,40925254 |  |
| 211223_at    | PROP1          | -1,089016378 | -0,679763839 | -0,40925254 |  |
| 215055_at    | B3GNTL1        | -1,089016378 | -0,679763839 | -0,40925254 |  |
| 221072_at    | GSN-AS1        | -1,089016378 | -0,679763839 | -0,40925254 |  |
| 229090_at    | ZEB1-AS1       | -1,089016378 | -0,679763839 | -0,40925254 |  |
| 230461_s_at  | -              | -1,089016378 | -0,679763839 | -0,40925254 |  |
| 206059_at    | ZNF91          | 2,976955384  | 3,386261038  | -0,40930565 |  |
| 229671_s_at  | MIS18A         | 0,57782909   | 0,987376598  | -0,40954751 |  |
| 1554862_at   | CMAHP          | -2,866296344 | -2,456406426 | -0,40988992 |  |
| 1555263_at   | -              | -2,866296344 | -2,456406426 | -0,40988992 |  |
| 1559208_at   | ST7-OT4        | -2,866296344 | -2,456406426 | -0,40988992 |  |
| 1560407_at   | MARK1          | -2,866296344 | -2,456406426 | -0,40988992 |  |
| 1561396_at   | EPHA6          | -2,866296344 | -2,456406426 | -0,40988992 |  |
| 1562371_s_at | VWA3B          | -2,866296344 | -2,456406426 | -0,40988992 |  |
| 1568746_a_at | LOC646268      | -2,866296344 | -2,456406426 | -0,40988992 |  |
| 206727_at    | C9             | -2,866296344 | -2,456406426 | -0,40988992 |  |
| 207837_at    | RBPMS          | -2,866296344 | -2,456406426 | -0,40988992 |  |
| 215958_at    | -              | -2,866296344 | -2,456406426 | -0,40988992 |  |
| 217151_at    | -              | -2,866296344 | -2,456406426 | -0,40988992 |  |
| 231227_at    | WNT5A          | -2,866296344 | -2,456406426 | -0,40988992 |  |
| 234081_at    | -              | -2,866296344 | -2,456406426 | -0,40988992 |  |
| 234673_at    | HHLA2          | -2,866296344 | -2,456406426 | -0,40988992 |  |
| 237673_at    | -              | -2,866296344 | -2,456406426 | -0,40988992 |  |
| 243562_at    | KNG1           | -2,866296344 | -2,456406426 | -0,40988992 |  |
| 244327_at    | -              | -2,866296344 | -2,456406426 | -0,40988992 |  |
| 206945_at    | LCT            | -0,759588698 | -0,34958478  | -0,41000392 |  |
| 225877_at    | TYSND1         | -0,759588698 | -0,34958478  | -0,41000392 |  |
| 230999_at    | -              | -0,759588698 | -0,34958478  | -0,41000392 |  |
| 231922_at    | ZNF276         | -0,759588698 | -0,34958478  | -0,41000392 |  |
| 232460_at    | HGS            | -0,759588698 | -0,34958478  | -0,41000392 |  |
| 237455_at    | -              | -0,759588698 | -0,34958478  | -0,41000392 |  |
| 242970_at    | DIP2B          | -0,759588698 | -0,34958478  | -0,41000392 |  |
| 221628_s_at  | GLYR1          | 0,228146222  | 0,638150376  | -0,41000415 |  |
| 224961_at    | SCYL2          | 2,745814053  | 3,155865206  | -0,41005115 |  |
| 206076_at    | LRRC23         | -0,512251684 | -0,102100538 | -0,41015115 |  |
| 228648_at    | LRG1           | -0,512251684 | -0,102100538 | -0,41015115 |  |
| 232285_at    | -              | -0,512251684 | -0,102100538 | -0,41015115 |  |
| 236956_at    | -              | -0,512251684 | -0,102100538 | -0,41015115 |  |
| 238735_at    | -              | -0,512251684 | -0,102100538 | -0,41015115 |  |
| 213582_at    | ATP11A         | -0,234278768 | 0,176436073  | -0,41071484 |  |
| 217080_s_at  | HOMER2         | -0,234278768 | 0,176436073  | -0,41071484 |  |
| 222916_s_at  | HDLBP          | -0,234278768 | 0,176436073  | -0,41071484 |  |
| 230488_s_at  | DBH-AS1        | -0,234278768 | 0,176436073  | -0,41071484 |  |

|              |                 |              |              |             |  |
|--------------|-----------------|--------------|--------------|-------------|--|
| 1565484_x_at | EGFR            | -0,946847173 | -0,536087151 | -0,41076002 |  |
| 208888_s_at  | NCOR2           | -0,946847173 | -0,536087151 | -0,41076002 |  |
| 231147_at    | -               | -0,946847173 | -0,536087151 | -0,41076002 |  |
| 230416_at    | -               | 4,219720829  | 4,630634579  | -0,41091375 |  |
| 1555717_at   | -               | -3,448416261 | -3,037500868 | -0,41091539 |  |
| 1553483_at   | TSGA10IP        | -0,033456564 | 0,377530647  | -0,41098721 |  |
| 211993_at    | WNK1            | 0,083054335  | 0,495031851  | -0,41197752 |  |
| 222348_at    | MAST4           | 0,083054335  | 0,495031851  | -0,41197752 |  |
| 203920_at    | NR1H3           | 1,296557217  | 1,708698295  | -0,41214108 |  |
| 242578_x_at  | SLC22A3         | 1,296557217  | 1,708698295  | -0,41214108 |  |
| 206542_s_at  | SMARCA2         | 1,567778694  | 1,979940779  | -0,41216209 |  |
| 211326_x_at  | HFE             | -0,352951799 | 0,059218869  | -0,41217067 |  |
| 243131_x_at  | -               | -0,352951799 | 0,059218869  | -0,41217067 |  |
| 1559578_at   | -               | -1,026571149 | -0,614371577 | -0,41219957 |  |
| 1566569_at   | -               | -1,026571149 | -0,614371577 | -0,41219957 |  |
| 202940_at    | WNK1            | -1,026571149 | -0,614371577 | -0,41219957 |  |
| 208526_at    | OR2F1           | -1,026571149 | -0,614371577 | -0,41219957 |  |
| 208747_s_at  | C1S             | -1,026571149 | -0,614371577 | -0,41219957 |  |
| 211597_s_at  | HOPX            | -1,026571149 | -0,614371577 | -0,41219957 |  |
| 213240_s_at  | KRT4            | -1,026571149 | -0,614371577 | -0,41219957 |  |
| 214874_at    | PKP4            | -1,026571149 | -0,614371577 | -0,41219957 |  |
| 217689_at    | PTPN1           | -1,026571149 | -0,614371577 | -0,41219957 |  |
| 224540_at    | LACRT           | -1,026571149 | -0,614371577 | -0,41219957 |  |
| 236804_at    | -               | -1,026571149 | -0,614371577 | -0,41219957 |  |
| 237043_at    | -               | -1,026571149 | -0,614371577 | -0,41219957 |  |
| 1558375_at   | LRRC38          | -3,192553003 | -2,780313924 | -0,41223908 |  |
| 1562292_at   | ANKRD30B        | -3,192553003 | -2,780313924 | -0,41223908 |  |
| 1563188_at   | -               | -3,192553003 | -2,780313924 | -0,41223908 |  |
| 1563450_at   | DEFB107A /// DE | -3,192553003 | -2,780313924 | -0,41223908 |  |
| 210814_at    | TRPC3           | -3,192553003 | -2,780313924 | -0,41223908 |  |
| 212768_s_at  | OLFM4           | -3,192553003 | -2,780313924 | -0,41223908 |  |
| 232056_at    | SCEL            | -3,192553003 | -2,780313924 | -0,41223908 |  |
| 242348_at    | FAM19A4         | -3,192553003 | -2,780313924 | -0,41223908 |  |
| 213730_x_at  | TCF3            | 2,646022818  | 3,058687544  | -0,41266473 |  |
| 229288_at    | EPHA7           | 1,094335495  | 1,507116528  | -0,41278103 |  |
| 226966_at    | PRPF40B         | -0,43775896  | -0,024572586 | -0,41318637 |  |
| 1555931_at   | TSGA10          | -0,83191556  | -0,41858459  | -0,41333097 |  |
| 1561390_at   | FAM41AY1 /// FA | -0,83191556  | -0,41858459  | -0,41333097 |  |
| 205392_s_at  | CCL14 /// CCL14 | -0,83191556  | -0,41858459  | -0,41333097 |  |
| 209443_at    | SERPINA5        | -0,83191556  | -0,41858459  | -0,41333097 |  |
| 209696_at    | FBP1            | -0,83191556  | -0,41858459  | -0,41333097 |  |
| 209792_s_at  | KLK10           | -0,83191556  | -0,41858459  | -0,41333097 |  |
| 213749_at    | MASP1           | -0,83191556  | -0,41858459  | -0,41333097 |  |
| 224507_s_at  | MGC12916        | -0,83191556  | -0,41858459  | -0,41333097 |  |
| 231337_at    | DKFZp686O1327   | -0,83191556  | -0,41858459  | -0,41333097 |  |
| 224473_x_at  | LZTS2           | 1,04816921   | 1,461646549  | -0,41347734 |  |
| 212719_at    | PHLPP1          | 0,291166226  | 0,704715219  | -0,41354899 |  |
| 233307_x_at  | LOC100505828 /  | 1,850809354  | 2,264418116  | -0,41360876 |  |
| 212376_s_at  | EP400           | 1,689737652  | 2,103505212  | -0,41376756 |  |
| 1562681_at   | LOC338651       | -1,424023738 | -1,010192375 | -0,41383136 |  |
| 206987_x_at  | FGF18           | -1,424023738 | -1,010192375 | -0,41383136 |  |
| 208565_at    | MC5R            | -1,424023738 | -1,010192375 | -0,41383136 |  |
| 212729_at    | DLG3            | -1,424023738 | -1,010192375 | -0,41383136 |  |
| 224118_at    | UBE2B           | -1,424023738 | -1,010192375 | -0,41383136 |  |
| 232955_at    | FLJ41170        | -1,424023738 | -1,010192375 | -0,41383136 |  |
| 235419_at    | -               | -1,424023738 | -1,010192375 | -0,41383136 |  |

|              |              |              |              |             |  |
|--------------|--------------|--------------|--------------|-------------|--|
| 241377_s_at  | MIB2         | -1,424023738 | -1,010192375 | -0,41383136 |  |
| 207408_at    | SLC22A14     | 0,518867317  | 0,932882274  | -0,41401496 |  |
| 229442_at    | C18orf54     | 2,55541096   | 2,969455976  | -0,41404502 |  |
| 1554591_at   | GDEP         | -0,57445847  | -0,160136748 | -0,41432172 |  |
| 1557335_at   | -            | -0,57445847  | -0,160136748 | -0,41432172 |  |
| 1565886_at   | -            | -0,57445847  | -0,160136748 | -0,41432172 |  |
| 208491_s_at  | PGM5         | -0,57445847  | -0,160136748 | -0,41432172 |  |
| 212249_at    | PIK3R1       | -0,57445847  | -0,160136748 | -0,41432172 |  |
| 212974_at    | DENND3       | -0,57445847  | -0,160136748 | -0,41432172 |  |
| 216076_at    | L3MBTL1      | -0,57445847  | -0,160136748 | -0,41432172 |  |
| 216407_at    | VAC14        | -0,57445847  | -0,160136748 | -0,41432172 |  |
| 216889_s_at  | HNF4A        | -0,57445847  | -0,160136748 | -0,41432172 |  |
| 220016_at    | AHNAK        | -0,57445847  | -0,160136748 | -0,41432172 |  |
| 231233_at    | KDM5B-AS1    | -0,57445847  | -0,160136748 | -0,41432172 |  |
| 240798_at    | -            | -0,57445847  | -0,160136748 | -0,41432172 |  |
| 1554635_a_at | NPAS3        | -0,078265071 | 0,336136178  | -0,41440125 |  |
| 1560431_at   | -            | -2,823166348 | -2,408705138 | -0,41446121 |  |
| 1560932_at   | FLJ31356     | -2,823166348 | -2,408705138 | -0,41446121 |  |
| 1562608_at   | -            | -2,823166348 | -2,408705138 | -0,41446121 |  |
| 1562683_a_at | LOC285547    | -2,823166348 | -2,408705138 | -0,41446121 |  |
| 1569693_at   | BTBD8        | -2,823166348 | -2,408705138 | -0,41446121 |  |
| 206830_at    | SLC4A10      | -2,823166348 | -2,408705138 | -0,41446121 |  |
| 214382_at    | UNC93A       | -2,823166348 | -2,408705138 | -0,41446121 |  |
| 215937_at    | PTGDR        | -2,823166348 | -2,408705138 | -0,41446121 |  |
| 220388_at    | FER1L4       | -2,823166348 | -2,408705138 | -0,41446121 |  |
| 227752_at    | SPTLC3       | -2,823166348 | -2,408705138 | -0,41446121 |  |
| 237551_at    | -            | -2,823166348 | -2,408705138 | -0,41446121 |  |
| 237958_at    | -            | -2,823166348 | -2,408705138 | -0,41446121 |  |
| 204164_at    | SIPA1        | 0,984222186  | 1,398700978  | -0,41447879 |  |
| 216183_at    | TGM2         | -0,285837228 | 0,128747141  | -0,41458437 |  |
| 220221_at    | VPS13D       | -0,285837228 | 0,128747141  | -0,41458437 |  |
| 222211_x_at  | SCAND2       | -0,285837228 | 0,128747141  | -0,41458437 |  |
| 238068_at    | -            | 0,888485433  | 1,303116084  | -0,41463065 |  |
| 228088_at    | SESTD1       | -0,67289328  | -0,258114234 | -0,41477905 |  |
| 230531_at    | KCNC3        | -0,67289328  | -0,258114234 | -0,41477905 |  |
| 238159_at    | -            | -0,67289328  | -0,258114234 | -0,41477905 |  |
| 202815_s_at  | HEXIM1       | 0,934330293  | 1,349621332  | -0,41529104 |  |
| 226847_at    | FST          | 0,934330293  | 1,349621332  | -0,41529104 |  |
| 1556654_at   | CDK12        | -1,838812296 | -1,423348341 | -0,41546395 |  |
| 1557418_at   | ACSL4        | -1,838812296 | -1,423348341 | -0,41546395 |  |
| 1558586_at   | ZNF33B       | -1,838812296 | -1,423348341 | -0,41546395 |  |
| 1561844_at   | -            | -1,838812296 | -1,423348341 | -0,41546395 |  |
| 1569392_at   | TECR         | -1,838812296 | -1,423348341 | -0,41546395 |  |
| 1570234_at   | -            | -1,838812296 | -1,423348341 | -0,41546395 |  |
| 207007_at    | NR1I3        | -1,838812296 | -1,423348341 | -0,41546395 |  |
| 207150_at    | SLC18A3      | -1,838812296 | -1,423348341 | -0,41546395 |  |
| 214799_at    | NFASC        | -1,838812296 | -1,423348341 | -0,41546395 |  |
| 215430_at    | GK2          | -1,838812296 | -1,423348341 | -0,41546395 |  |
| 229554_at    | LUM          | -1,838812296 | -1,423348341 | -0,41546395 |  |
| 239323_at    | LOC100216546 | -1,838812296 | -1,423348341 | -0,41546395 |  |
| 240482_at    | -            | -1,838812296 | -1,423348341 | -0,41546395 |  |
| 206961_s_at  | MED20        | 1,683039483  | 2,098562556  | -0,41552307 |  |
| 221929_at    | -            | -0,148196756 | 0,26733076   | -0,41552752 |  |
| 232663_s_at  | UBAP1L       | -0,148196756 | 0,26733076   | -0,41552752 |  |
| 1553464_at   | FLJ40288     | 0,728550685  | 1,144305291  | -0,41575461 |  |
| 204394_at    | SLC43A1      | 1,269985355  | 1,685812099  | -0,41582674 |  |

|              |                   |              |              |             |  |
|--------------|-------------------|--------------|--------------|-------------|--|
| 1560439_at   | LINGO3            | 1,318332599  | 1,73441697   | -0,41608437 |  |
| 209286_at    | CDC42EP3          | 2,109966786  | 2,526063925  | -0,41609714 |  |
| 214870_x_at  | LOC100288332 /    | 3,171349466  | 3,587527995  | -0,41617853 |  |
| 221651_x_at  | IGK@ /// IGKC /// | 0,962260738  | 1,378453643  | -0,41619291 |  |
| 233589_x_at  | TOR4A             | 0,962260738  | 1,378453643  | -0,41619291 |  |
| 233889_at    | TBX18             | -0,022466681 | 0,393761504  | -0,41622818 |  |
| 230955_s_at  | C20orf112         | 0,255492549  | 0,67181667   | -0,41632412 |  |
| 228008_at    | -                 | 1,726031811  | 2,14244844   | -0,41641663 |  |
| 230237_at    | ADCYAP1           | 1,326951551  | 1,743944487  | -0,41699294 |  |
| 214194_at    | DIS3              | 0,648296226  | 1,065442793  | -0,41714657 |  |
| 241727_x_at  | DHFRL1            | 1,119359127  | 1,536652708  | -0,41729358 |  |
| 237821_at    | -                 | -3,41365796  | -2,996335703 | -0,41732226 |  |
| 208185_x_at  | -                 | 0,97328325   | 1,390636111  | -0,41735286 |  |
| 201222_s_at  | RAD23B            | 5,088452866  | 5,505808999  | -0,41735613 |  |
| 218064_s_at  | AKAP8L            | 2,173470163  | 2,590852465  | -0,4173823  |  |
| 1553568_a_at | HIST1H1T          | -0,496991414 | -0,079522948 | -0,41746847 |  |
| 1560697_at   | TRHDE-AS1         | -0,496991414 | -0,079522948 | -0,41746847 |  |
| 1564381_s_at | LOC100505876      | -0,496991414 | -0,079522948 | -0,41746847 |  |
| 206227_at    | CILP              | -0,496991414 | -0,079522948 | -0,41746847 |  |
| 220151_at    | C19orf73          | -0,496991414 | -0,079522948 | -0,41746847 |  |
| 230277_at    | LOC100289187      | -0,496991414 | -0,079522948 | -0,41746847 |  |
| 244672_at    | WDR1              | -0,496991414 | -0,079522948 | -0,41746847 |  |
| 244864_at    | LOC100505562      | -0,496991414 | -0,079522948 | -0,41746847 |  |
| 1559566_at   | FBXO42            | -2,504600601 | -2,086984744 | -0,41761586 |  |
| 1561086_at   | -                 | -2,504600601 | -2,086984744 | -0,41761586 |  |
| 1561474_at   | -                 | -2,504600601 | -2,086984744 | -0,41761586 |  |
| 1565034_s_at | AFF3              | -2,504600601 | -2,086984744 | -0,41761586 |  |
| 204014_at    | DUSP4             | -2,504600601 | -2,086984744 | -0,41761586 |  |
| 211276_at    | TCEAL2            | -2,504600601 | -2,086984744 | -0,41761586 |  |
| 211877_s_at  | PCDHGA11 /// P    | -2,504600601 | -2,086984744 | -0,41761586 |  |
| 214708_at    | SNTB1             | -2,504600601 | -2,086984744 | -0,41761586 |  |
| 218899_s_at  | BAALC             | -2,504600601 | -2,086984744 | -0,41761586 |  |
| 220382_s_at  | ARHGAP28          | -2,504600601 | -2,086984744 | -0,41761586 |  |
| 227312_at    | SNTB2             | -2,504600601 | -2,086984744 | -0,41761586 |  |
| 235400_at    | FCRLA             | -2,504600601 | -2,086984744 | -0,41761586 |  |
| 239766_at    | -                 | -2,504600601 | -2,086984744 | -0,41761586 |  |
| 243485_at    | -                 | -2,504600601 | -2,086984744 | -0,41761586 |  |
| 203019_x_at  | SSX2IP            | 1,348276312  | 1,765933685  | -0,41765737 |  |
| 210627_s_at  | MOGS              | 2,001086023  | 2,419116683  | -0,41803066 |  |
| 1552693_at   | ARL11             | -3,15396682  | -2,735862426 | -0,41810439 |  |
| 1553636_at   | TMCO5A            | -3,15396682  | -2,735862426 | -0,41810439 |  |
| 1561136_at   | GYPE              | -3,15396682  | -2,735862426 | -0,41810439 |  |
| 1563310_a_at | -                 | -3,15396682  | -2,735862426 | -0,41810439 |  |
| 1564292_at   | -                 | -3,15396682  | -2,735862426 | -0,41810439 |  |
| 204304_s_at  | PROM1             | -3,15396682  | -2,735862426 | -0,41810439 |  |
| 208045_at    | -                 | -3,15396682  | -2,735862426 | -0,41810439 |  |
| 224290_at    | VN1R3             | -3,15396682  | -2,735862426 | -0,41810439 |  |
| 230130_at    | SLIT2             | -3,15396682  | -2,735862426 | -0,41810439 |  |
| 237477_at    | PDCL2             | -3,15396682  | -2,735862426 | -0,41810439 |  |
| 214295_at    | KIAA0485          | 0,273439642  | 0,691645685  | -0,41820604 |  |
| 217219_at    | DKFZP434A062      | 0,273439642  | 0,691645685  | -0,41820604 |  |
| 224361_s_at  | IL17RB            | 0,273439642  | 0,691645685  | -0,41820604 |  |
| 208459_s_at  | XPO7              | 1,709647566  | 2,127967638  | -0,41832007 |  |
| 205022_s_at  | FOXN3             | 2,333865983  | 2,752192409  | -0,41832643 |  |
| 217307_at    | ACO2              | -0,00073712  | 0,417770464  | -0,41850758 |  |
| 234590_x_at  | -                 | -0,00073712  | 0,417770464  | -0,41850758 |  |



|              |                 |              |              |             |  |
|--------------|-----------------|--------------|--------------|-------------|--|
| 235028_at    | -               | -0,00073712  | 0,417770464  | -0,41850758 |  |
| 219306_at    | KIF15           | 2,266015882  | 2,684536601  | -0,41852072 |  |
| 1560371_at   | LOC401321       | -0,741668563 | -0,322870281 | -0,41879828 |  |
| 207685_at    | CRYBB3          | -0,741668563 | -0,322870281 | -0,41879828 |  |
| 210329_s_at  | SGCD            | -0,741668563 | -0,322870281 | -0,41879828 |  |
| 211253_x_at  | PYY             | -0,741668563 | -0,322870281 | -0,41879828 |  |
| 217404_s_at  | COL2A1          | -0,741668563 | -0,322870281 | -0,41879828 |  |
| 220823_at    | LOC729164       | -0,741668563 | -0,322870281 | -0,41879828 |  |
| 232128_s_at  | CLCN5           | -0,741668563 | -0,322870281 | -0,41879828 |  |
| 238187_at    | C2orf57         | -0,741668563 | -0,322870281 | -0,41879828 |  |
| 1554806_a_at | FBXO8           | 2,003776245  | 2,423075926  | -0,41929968 |  |
| 242890_at    | -               | 1,011212064  | 1,43051703   | -0,41930497 |  |
| 201183_s_at  | CHD4            | 2,926807124  | 3,346162854  | -0,41935573 |  |
| 229566_at    | LOC645638       | -0,196756757 | 0,222599095  | -0,41935585 |  |
| 1553583_a_at | THRSP           | -1,639579028 | -1,220210588 | -0,41936844 |  |
| 1561175_at   | LOC283482       | -1,639579028 | -1,220210588 | -0,41936844 |  |
| 1570078_a_at | DOCK5           | -1,639579028 | -1,220210588 | -0,41936844 |  |
| 204830_x_at  | PSG5            | -1,639579028 | -1,220210588 | -0,41936844 |  |
| 208278_s_at  | -               | -1,639579028 | -1,220210588 | -0,41936844 |  |
| 220946_s_at  | SETD2           | -1,639579028 | -1,220210588 | -0,41936844 |  |
| 221093_at    | BRD7P3          | -1,639579028 | -1,220210588 | -0,41936844 |  |
| 232792_at    | TRIM69          | -1,639579028 | -1,220210588 | -0,41936844 |  |
| 236795_at    | -               | -1,639579028 | -1,220210588 | -0,41936844 |  |
| 238489_at    | PRKAA2          | -1,639579028 | -1,220210588 | -0,41936844 |  |
| 240038_at    | -               | -1,639579028 | -1,220210588 | -0,41936844 |  |
| 244746_at    | SEMA6D          | -1,639579028 | -1,220210588 | -0,41936844 |  |
| 205870_at    | BDKRB2          | -0,986356909 | -0,566887459 | -0,41946945 |  |
| 211483_x_at  | CAMK2B          | -0,986356909 | -0,566887459 | -0,41946945 |  |
| 227192_at    | PRRT2           | -0,986356909 | -0,566887459 | -0,41946945 |  |
| 229682_at    | MAPRE3          | -0,986356909 | -0,566887459 | -0,41946945 |  |
| 235626_at    | CAMK1D          | -0,986356909 | -0,566887459 | -0,41946945 |  |
| 239528_at    | PROM2           | -0,986356909 | -0,566887459 | -0,41946945 |  |
| 227908_at    | TBC1D24         | 1,496984567  | 1,916759838  | -0,41977527 |  |
| 208657_s_at  | 40057           | 1,339784194  | 1,759685182  | -0,41990099 |  |
| 51158_at     | FAM174B         | -2,14403521  | -1,723927293 | -0,42010792 |  |
| 212324_s_at  | VPS13D          | 0,384950573  | 0,805216064  | -0,42026549 |  |
| 226130_at    | RPS16           | 1,021868205  | 1,442269454  | -0,42040125 |  |
| 1559148_at   | -               | -1,470833215 | -1,050406615 | -0,4204266  |  |
| 229019_at    | ZNF385B         | -1,470833215 | -1,050406615 | -0,4204266  |  |
| 234268_at    | SLC2A13         | -1,470833215 | -1,050406615 | -0,4204266  |  |
| 236658_at    | -               | -1,470833215 | -1,050406615 | -0,4204266  |  |
| 240743_at    | -               | -1,470833215 | -1,050406615 | -0,4204266  |  |
| 243680_at    | LOC100506476    | -1,470833215 | -1,050406615 | -0,4204266  |  |
| 233041_x_at  | -               | 1,683039483  | 2,103505212  | -0,42046573 |  |
| 214955_at    | TMPRSS6         | 0,555999837  | 0,976641161  | -0,42064132 |  |
| 1570182_at   | -               | -0,467091869 | -0,046302147 | -0,42078972 |  |
| 214238_at    | -               | -0,467091869 | -0,046302147 | -0,42078972 |  |
| 237372_at    | -               | -0,467091869 | -0,046302147 | -0,42078972 |  |
| 244652_at    | -               | -0,467091869 | -0,046302147 | -0,42078972 |  |
| 228271_at    | -               | 1,780386218  | 2,201267805  | -0,42088159 |  |
| 1553494_at   | TDH             | -1,240169874 | -0,819238336 | -0,42093154 |  |
| 1557089_at   | KIF5C           | -1,240169874 | -0,819238336 | -0,42093154 |  |
| 1568448_at   | -               | -1,240169874 | -0,819238336 | -0,42093154 |  |
| 207047_s_at  | CLCNKA /// CLCN | -1,240169874 | -0,819238336 | -0,42093154 |  |
| 216086_at    | SV2C            | -1,240169874 | -0,819238336 | -0,42093154 |  |
| 217867_x_at  | BACE2           | -1,240169874 | -0,819238336 | -0,42093154 |  |

|              |                 |              |              |             |  |
|--------------|-----------------|--------------|--------------|-------------|--|
| 224256_at    | LOC100129449    | -1,240169874 | -0,819238336 | -0,42093154 |  |
| 227659_at    | PLEKHA3         | -1,240169874 | -0,819238336 | -0,42093154 |  |
| 229752_at    | IKZF4           | -1,240169874 | -0,819238336 | -0,42093154 |  |
| 230529_at    | HECA            | -1,240169874 | -0,819238336 | -0,42093154 |  |
| 230753_at    | PATL2           | -1,240169874 | -0,819238336 | -0,42093154 |  |
| 231079_at    | -               | -1,240169874 | -0,819238336 | -0,42093154 |  |
| 235323_at    | LOC100499489    | -1,240169874 | -0,819238336 | -0,42093154 |  |
| 1552502_s_at | RHBDL2          | -2,756478458 | -2,335104118 | -0,42137434 |  |
| 1557278_s_at | TNPO1           | -2,756478458 | -2,335104118 | -0,42137434 |  |
| 1557881_at   | ZNF32-AS3       | -2,756478458 | -2,335104118 | -0,42137434 |  |
| 1559488_at   | LOC257358       | -2,756478458 | -2,335104118 | -0,42137434 |  |
| 1561573_at   | -               | -2,756478458 | -2,335104118 | -0,42137434 |  |
| 1565337_at   | DNAH6           | -2,756478458 | -2,335104118 | -0,42137434 |  |
| 1570116_at   | -               | -2,756478458 | -2,335104118 | -0,42137434 |  |
| 220697_at    | -               | -2,756478458 | -2,335104118 | -0,42137434 |  |
| 227236_at    | TSPAN2          | -2,756478458 | -2,335104118 | -0,42137434 |  |
| 229725_at    | ACSL6 /// LOC10 | -2,756478458 | -2,335104118 | -0,42137434 |  |
| 231007_at    | -               | -2,756478458 | -2,335104118 | -0,42137434 |  |
| 231489_x_at  | -               | -2,756478458 | -2,335104118 | -0,42137434 |  |
| 233327_at    | UBE3D           | -2,756478458 | -2,335104118 | -0,42137434 |  |
| 234028_at    | -               | -2,756478458 | -2,335104118 | -0,42137434 |  |
| 234164_at    | -               | -2,756478458 | -2,335104118 | -0,42137434 |  |
| 235318_at    | FBN1            | -2,756478458 | -2,335104118 | -0,42137434 |  |
| 237119_at    | -               | -2,756478458 | -2,335104118 | -0,42137434 |  |
| 238914_at    | DCC             | -2,756478458 | -2,335104118 | -0,42137434 |  |
| 240978_at    | -               | -2,756478458 | -2,335104118 | -0,42137434 |  |
| 241304_at    | PIK3C3          | -2,756478458 | -2,335104118 | -0,42137434 |  |
| 230176_at    | -               | 1,210676994  | 1,632095957  | -0,42141896 |  |
| 233892_at    | GRIN3B          | -0,172274514 | 0,249604176  | -0,42187869 |  |
| 238706_at    | PAPD4           | 0,072842263  | 0,495031851  | -0,42218959 |  |
| 1554618_at   | AGFG2           | -1,964176657 | -1,541908042 | -0,42226861 |  |
| 1555175_a_at | PBLD            | -1,964176657 | -1,541908042 | -0,42226861 |  |
| 1558390_at   | ZNF599          | -1,964176657 | -1,541908042 | -0,42226861 |  |
| 1563586_at   | LOC401324       | -1,964176657 | -1,541908042 | -0,42226861 |  |
| 1563679_at   | LOC150577       | -1,964176657 | -1,541908042 | -0,42226861 |  |
| 207734_at    | LAX1            | -1,964176657 | -1,541908042 | -0,42226861 |  |
| 207818_s_at  | HTR7            | -1,964176657 | -1,541908042 | -0,42226861 |  |
| 215447_at    | -               | -1,964176657 | -1,541908042 | -0,42226861 |  |
| 221132_at    | CLDN18          | -1,964176657 | -1,541908042 | -0,42226861 |  |
| 240940_at    | -               | -1,964176657 | -1,541908042 | -0,42226861 |  |
| 243446_at    | AJUBA           | -1,964176657 | -1,541908042 | -0,42226861 |  |
| 232529_at    | SP3             | 0,181384709  | 0,603679647  | -0,42229494 |  |
| 223610_at    | SEMA5B          | 0,792179257  | 1,214517879  | -0,42233862 |  |
| 224563_at    | WASF2           | 0,792179257  | 1,214517879  | -0,42233862 |  |
| 213141_at    | PSKH1           | 0,859074518  | 1,281471383  | -0,42239686 |  |
| 214030_at    | CRYBG3          | 1,269985355  | 1,692388143  | -0,42240279 |  |
| 203146_s_at  | GABBR1          | 0,606430281  | 1,029536893  | -0,42310661 |  |
| 216036_x_at  | WDTC1           | 0,606430281  | 1,029536893  | -0,42310661 |  |
| 205276_s_at  | GTPBP1          | -0,394749123 | 0,028364014  | -0,42311314 |  |
| 231664_at    | SLC25A29        | -0,394749123 | 0,028364014  | -0,42311314 |  |
| 209356_x_at  | EFEMP2          | 0,682279745  | 1,105412836  | -0,42313309 |  |
| 232169_x_at  | MIR4691 /// NDU | 1,814495998  | 2,237691445  | -0,42319545 |  |
| 1557769_at   | -               | -0,706943342 | -0,283667828 | -0,42327551 |  |
| 1563321_s_at | MLLT10          | -0,706943342 | -0,283667828 | -0,42327551 |  |
| 207044_at    | THRB            | -0,706943342 | -0,283667828 | -0,42327551 |  |
| 211661_x_at  | PTAFR           | -0,706943342 | -0,283667828 | -0,42327551 |  |

|              |              |              |              |             |  |
|--------------|--------------|--------------|--------------|-------------|--|
| 211841_s_at  | TNFRSF25     | -0,706943342 | -0,283667828 | -0,42327551 |  |
| 217071_s_at  | MTHFR        | -0,706943342 | -0,283667828 | -0,42327551 |  |
| 234349_at    | SSPO         | -0,706943342 | -0,283667828 | -0,42327551 |  |
| 1553373_at   | WDR64        | -2,384869671 | -1,961547147 | -0,42332252 |  |
| 1553861_at   | TCP11L2      | -2,384869671 | -1,961547147 | -0,42332252 |  |
| 1566002_at   | -            | -2,384869671 | -1,961547147 | -0,42332252 |  |
| 206909_at    | -            | -2,384869671 | -1,961547147 | -0,42332252 |  |
| 208133_at    | -            | -2,384869671 | -1,961547147 | -0,42332252 |  |
| 220854_at    | -            | -2,384869671 | -1,961547147 | -0,42332252 |  |
| 220869_at    | UBA6         | -2,384869671 | -1,961547147 | -0,42332252 |  |
| 224380_s_at  | TAF7L        | -2,384869671 | -1,961547147 | -0,42332252 |  |
| 226311_at    | ADAMTS2      | -2,384869671 | -1,961547147 | -0,42332252 |  |
| 230469_at    | RTKN2        | -2,384869671 | -1,961547147 | -0,42332252 |  |
| 231136_at    | MIR30C2      | -2,384869671 | -1,961547147 | -0,42332252 |  |
| 237313_at    | LOC100507410 | -2,384869671 | -1,961547147 | -0,42332252 |  |
| 239909_at    | ADAMTSL1     | -2,384869671 | -1,961547147 | -0,42332252 |  |
| 240031_at    | MSRA         | -2,384869671 | -1,961547147 | -0,42332252 |  |
| 244156_at    | -            | -2,384869671 | -1,961547147 | -0,42332252 |  |
| 206307_s_at  | FOXDI        | -0,112808516 | 0,310717132  | -0,42352565 |  |
| 212650_at    | EHBP1        | -0,112808516 | 0,310717132  | -0,42352565 |  |
| 241460_at    | -            | 1,534677255  | 1,958277216  | -0,42359996 |  |
| 1554354_at   | SIAE         | -3,37835     | -2,954576755 | -0,42377324 |  |
| 241274_at    | -            | -3,37835     | -2,954576755 | -0,42377324 |  |
| 205298_s_at  | BTN2A2       | 1,201332287  | 1,6252386    | -0,42390631 |  |
| 1556039_s_at | GPR173       | -3,114791413 | -2,690860744 | -0,42393067 |  |
| 207879_at    | -            | -3,114791413 | -2,690860744 | -0,42393067 |  |
| 209821_at    | IL33         | -3,114791413 | -2,690860744 | -0,42393067 |  |
| 212797_at    | SORT1        | -3,114791413 | -2,690860744 | -0,42393067 |  |
| 216463_at    | -            | -3,114791413 | -2,690860744 | -0,42393067 |  |
| 237891_at    | MDM2         | -3,114791413 | -2,690860744 | -0,42393067 |  |
| 241207_at    | -            | -3,114791413 | -2,690860744 | -0,42393067 |  |
| 215471_s_at  | MAP7         | 0,641402394  | 1,065442793  | -0,4240404  |  |
| 219451_at    | MSRB2        | 0,641402394  | 1,065442793  | -0,4240404  |  |
| 206056_x_at  | SPN          | 0,480753764  | 0,904843258  | -0,42408949 |  |
| 1553248_at   | CCDC57       | -1,688127507 | -1,264005341 | -0,42412217 |  |
| 1556621_a_at | -            | -1,688127507 | -1,264005341 | -0,42412217 |  |
| 1570145_at   | UCHL5        | -1,688127507 | -1,264005341 | -0,42412217 |  |
| 207377_at    | PPP1R2P9     | -1,688127507 | -1,264005341 | -0,42412217 |  |
| 216432_at    | SLC28A2      | -1,688127507 | -1,264005341 | -0,42412217 |  |
| 226141_at    | CCDC149      | -1,688127507 | -1,264005341 | -0,42412217 |  |
| 232207_at    | GUSBP4       | -1,688127507 | -1,264005341 | -0,42412217 |  |
| 233962_at    | -            | -1,688127507 | -1,264005341 | -0,42412217 |  |
| 239749_at    | FAF1         | -1,688127507 | -1,264005341 | -0,42412217 |  |
| 239781_at    | LINC00545    | -1,688127507 | -1,264005341 | -0,42412217 |  |
| 242599_at    | -            | -1,688127507 | -1,264005341 | -0,42412217 |  |
| 243006_at    | -            | -1,688127507 | -1,264005341 | -0,42412217 |  |
| 218114_at    | GGA1         | 1,119359127  | 1,543943227  | -0,4245841  |  |
| 225321_s_at  | PILRB        | 2,938102794  | 3,362748434  | -0,42464564 |  |
| 213242_x_at  | KIAA0284     | 1,783520648  | 2,208167653  | -0,424647   |  |
| 223202_s_at  | TMEM164      | 1,261018186  | 1,685812099  | -0,42479391 |  |
| 216300_x_at  | RARA         | 0,246434561  | 0,67181667   | -0,42538211 |  |
| 229919_at    | -            | 0,246434561  | 0,67181667   | -0,42538211 |  |
| 1552458_at   | MBD3L1       | -2,712026959 | -2,286583451 | -0,42544351 |  |
| 1554328_at   | STXBP4       | -2,712026959 | -2,286583451 | -0,42544351 |  |
| 1560226_at   | -            | -2,712026959 | -2,286583451 | -0,42544351 |  |
| 1562857_at   | -            | -2,712026959 | -2,286583451 | -0,42544351 |  |

|              |                 |              |              |             |  |
|--------------|-----------------|--------------|--------------|-------------|--|
| 1568762_at   | LOC728613 /// P | -2,712026959 | -2,286583451 | -0,42544351 |  |
| 203779_s_at  | MPZL2           | -2,712026959 | -2,286583451 | -0,42544351 |  |
| 205016_at    | TGFA            | -2,712026959 | -2,286583451 | -0,42544351 |  |
| 210119_at    | KCNJ15          | -2,712026959 | -2,286583451 | -0,42544351 |  |
| 214998_at    | AAK1            | -2,712026959 | -2,286583451 | -0,42544351 |  |
| 220844_at    | TCEB3B          | -2,712026959 | -2,286583451 | -0,42544351 |  |
| 223357_s_at  | MTIF3           | -2,712026959 | -2,286583451 | -0,42544351 |  |
| 230602_at    | ACMSD           | -2,712026959 | -2,286583451 | -0,42544351 |  |
| 231798_at    | NOG             | -2,712026959 | -2,286583451 | -0,42544351 |  |
| 233098_s_at  | EPB41L4B        | -2,712026959 | -2,286583451 | -0,42544351 |  |
| 233482_at    | -               | -2,712026959 | -2,286583451 | -0,42544351 |  |
| 241536_at    | -               | -2,712026959 | -2,286583451 | -0,42544351 |  |
| 1556929_at   | PAPOLG          | -0,089689931 | 0,336136178  | -0,42582611 |  |
| 205410_s_at  | ATP2B4          | -0,089689931 | 0,336136178  | -0,42582611 |  |
| 204144_s_at  | PIGQ            | -0,221656139 | 0,204310755  | -0,42596689 |  |
| 205411_at    | STK4            | -0,221656139 | 0,204310755  | -0,42596689 |  |
| 1560181_at   | LOC100288122    | -2,089474779 | -1,663414495 | -0,42606028 |  |
| 1562678_at   | -               | -2,089474779 | -1,663414495 | -0,42606028 |  |
| 1562893_at   | -               | -2,089474779 | -1,663414495 | -0,42606028 |  |
| 204289_at    | ALDH6A1         | -2,089474779 | -1,663414495 | -0,42606028 |  |
| 208010_s_at  | PTPN22          | -2,089474779 | -1,663414495 | -0,42606028 |  |
| 208446_s_at  | ZFYVE9          | -2,089474779 | -1,663414495 | -0,42606028 |  |
| 220017_x_at  | CYP2C9          | -2,089474779 | -1,663414495 | -0,42606028 |  |
| 222180_at    | -               | -2,089474779 | -1,663414495 | -0,42606028 |  |
| 225714_s_at  | -               | -2,089474779 | -1,663414495 | -0,42606028 |  |
| 232448_at    | LINC00543       | -2,089474779 | -1,663414495 | -0,42606028 |  |
| 233524_at    | LINC00475       | -2,089474779 | -1,663414495 | -0,42606028 |  |
| 235905_at    | ZNF704          | -2,089474779 | -1,663414495 | -0,42606028 |  |
| 236407_at    | KCNE1           | -2,089474779 | -1,663414495 | -0,42606028 |  |
| 242734_x_at  | GALT            | -2,089474779 | -1,663414495 | -0,42606028 |  |
| 201087_at    | PXN             | 1,844820248  | 2,271023131  | -0,42620288 |  |
| 227043_at    | CCDC159         | 0,810733188  | 1,23718272   | -0,42644953 |  |
| 1570451_at   | C1orf61         | -0,622910612 | -0,19610998  | -0,42680063 |  |
| 216500_at    | -               | -0,622910612 | -0,19610998  | -0,42680063 |  |
| 227816_at    | NTN1            | -0,622910612 | -0,19610998  | -0,42680063 |  |
| 229122_x_at  | NPRL3           | -0,622910612 | -0,19610998  | -0,42680063 |  |
| 237286_at    | INTS9           | -0,622910612 | -0,19610998  | -0,42680063 |  |
| 1557338_x_at | -               | -0,888496123 | -0,461594427 | -0,4269017  |  |
| 1566472_s_at | RETSAT          | -0,888496123 | -0,461594427 | -0,4269017  |  |
| 204995_at    | CDK5R1          | -0,888496123 | -0,461594427 | -0,4269017  |  |
| 212993_at    | NACC2           | -0,888496123 | -0,461594427 | -0,4269017  |  |
| 220602_s_at  | AGSK1 /// LOC38 | 0,359971644  | 0,786897721  | -0,42692608 |  |
| 1554340_a_at | C1orf187        | -2,930741289 | -2,503677622 | -0,42706367 |  |
| 1557571_at   | VPS13D          | -2,930741289 | -2,503677622 | -0,42706367 |  |
| 1559520_at   | GYPA            | -2,930741289 | -2,503677622 | -0,42706367 |  |
| 1559990_at   | -               | -2,930741289 | -2,503677622 | -0,42706367 |  |
| 1560851_at   | C10orf136       | -2,930741289 | -2,503677622 | -0,42706367 |  |
| 215008_at    | TLL2            | -2,930741289 | -2,503677622 | -0,42706367 |  |
| 220787_at    | -               | -2,930741289 | -2,503677622 | -0,42706367 |  |
| 228740_at    | -               | -2,930741289 | -2,503677622 | -0,42706367 |  |
| 230207_s_at  | DOCK5           | -2,930741289 | -2,503677622 | -0,42706367 |  |
| 234830_at    | FLJ20518        | -2,930741289 | -2,503677622 | -0,42706367 |  |
| 236521_at    | -               | -2,930741289 | -2,503677622 | -0,42706367 |  |
| 237780_at    | -               | -2,930741289 | -2,503677622 | -0,42706367 |  |
| 239938_x_at  | -               | -2,930741289 | -2,503677622 | -0,42706367 |  |
| 241811_x_at  | SLC6A4          | -2,930741289 | -2,503677622 | -0,42706367 |  |

|              |                 |              |              |             |  |
|--------------|-----------------|--------------|--------------|-------------|--|
| 244782_at    | PPP3R2          | -2,930741289 | -2,503677622 | -0,42706367 |  |
| 230977_at    | NPM2            | -0,033456564 | 0,393761504  | -0,42721807 |  |
| 225080_at    | MYO1C           | 1,530951994  | 1,958277216  | -0,42732522 |  |
| 202122_s_at  | PLIN3           | 3,308224834  | 3,735753654  | -0,42752882 |  |
| 209871_s_at  | APBA2           | 0,052199481  | 0,479907041  | -0,42770756 |  |
| 1554614_a_at | PTBP2           | -0,299034815 | 0,128747141  | -0,42778196 |  |
| 229985_at    | BTNL9           | -0,299034815 | 0,128747141  | -0,42778196 |  |
| 1563008_at   | LOC100287877    | -1,2845686   | -0,855751026 | -0,42881757 |  |
| 1565756_a_at | METAP1D         | -1,2845686   | -0,855751026 | -0,42881757 |  |
| 1565906_at   | NADSYN1         | -1,2845686   | -0,855751026 | -0,42881757 |  |
| 205824_at    | HSPB2           | -1,2845686   | -0,855751026 | -0,42881757 |  |
| 213004_at    | ANGPTL2         | -1,2845686   | -0,855751026 | -0,42881757 |  |
| 216365_x_at  | IGLC1 /// IGLJ3 | -1,2845686   | -0,855751026 | -0,42881757 |  |
| 221344_at    | OR12D2          | -1,2845686   | -0,855751026 | -0,42881757 |  |
| 222285_at    | IGHD            | -1,2845686   | -0,855751026 | -0,42881757 |  |
| 224425_x_at  | ACTR3BP2        | -1,2845686   | -0,855751026 | -0,42881757 |  |
| 229477_at    | THRSP           | -1,2845686   | -0,855751026 | -0,42881757 |  |
| 229999_at    | RBMX /// SNORD  | -1,2845686   | -0,855751026 | -0,42881757 |  |
| 244017_at    | -               | -1,2845686   | -0,855751026 | -0,42881757 |  |
| 216952_s_at  | LMNB2           | 2,520143371  | 2,949006836  | -0,42886347 |  |
| 1556043_a_at | TTN-AS1         | 0,103263601  | 0,532164371  | -0,42890077 |  |
| 215605_at    | NCOA2           | 0,103263601  | 0,532164371  | -0,42890077 |  |
| 208713_at    | HNRNPUL1        | 4,129607882  | 4,558677353  | -0,42906947 |  |
| 226192_at    | AR              | 2,487840343  | 2,917077481  | -0,42923714 |  |
| 223161_at    | KIAA1147        | 0,928678725  | 1,3579181    | -0,42923938 |  |
| 227207_x_at  | ZNF213          | 0,417596971  | 0,847075464  | -0,42947849 |  |
| 208110_x_at  | MED25           | 2,038300149  | 2,467842989  | -0,42954284 |  |
| 222233_s_at  | DCLRE1C         | 1,114389003  | 1,543943227  | -0,42955422 |  |
| 220203_at    | BMP8A           | 0,747935635  | 1,177496821  | -0,42956119 |  |
| 210905_x_at  | POU5F1P4        | -0,136301282 | 0,293518836  | -0,42982012 |  |
| 219445_at    | GLTSCR1         | 1,314003737  | 1,743944487  | -0,42994075 |  |
| 208889_s_at  | NCOR2           | -0,59053611  | -0,160136748 | -0,43039936 |  |
| 219009_at    | C14orf93        | -0,59053611  | -0,160136748 | -0,43039936 |  |
| 222927_s_at  | CPLX3           | -0,59053611  | -0,160136748 | -0,43039936 |  |
| 224397_s_at  | TMTC1           | -0,59053611  | -0,160136748 | -0,43039936 |  |
| 238341_at    | -               | -0,59053611  | -0,160136748 | -0,43039936 |  |
| 243891_at    | -               | -0,59053611  | -0,160136748 | -0,43039936 |  |
| 244825_at    | SHROOM4         | -0,59053611  | -0,160136748 | -0,43039936 |  |
| 1554758_a_at | CD99L2          | -1,543331864 | -1,112851844 | -0,43048002 |  |
| 1560589_a_at | -               | -1,543331864 | -1,112851844 | -0,43048002 |  |
| 1566044_at   | -               | -1,543331864 | -1,112851844 | -0,43048002 |  |
| 210873_x_at  | APOBEC3A        | -1,543331864 | -1,112851844 | -0,43048002 |  |
| 234508_at    | -               | -1,543331864 | -1,112851844 | -0,43048002 |  |
| 239875_at    | NAB1            | -1,543331864 | -1,112851844 | -0,43048002 |  |
| 240809_at    | ZNF295-AS1      | -1,543331864 | -1,112851844 | -0,43048002 |  |
| 216838_at    | LOC92249        | 0,518867317  | 0,949447784  | -0,43058047 |  |
| 1554685_a_at | KIAA1199        | -0,423248115 | 0,007421914  | -0,43067003 |  |
| 1564573_at   | IFITM10         | -0,423248115 | 0,007421914  | -0,43067003 |  |
| 1566029_at   | -               | -0,423248115 | 0,007421914  | -0,43067003 |  |
| 209822_s_at  | VLDLR           | -0,423248115 | 0,007421914  | -0,43067003 |  |
| 222271_at    | -               | -0,423248115 | 0,007421914  | -0,43067003 |  |
| 233235_x_at  | -               | -0,423248115 | 0,007421914  | -0,43067003 |  |
| 203955_at    | PPP1R26         | 0,760715727  | 1,191491281  | -0,43077555 |  |
| 204636_at    | COL17A1         | -1,196375121 | -0,765504029 | -0,43087109 |  |
| 206628_at    | SLC5A1          | -1,196375121 | -0,765504029 | -0,43087109 |  |
| 219197_s_at  | SCUBE2          | -1,196375121 | -0,765504029 | -0,43087109 |  |

|              |                |              |              |             |  |
|--------------|----------------|--------------|--------------|-------------|--|
| 229853_at    | KAL1           | -1,196375121 | -0,765504029 | -0,43087109 |  |
| 231168_at    | -              | -1,196375121 | -0,765504029 | -0,43087109 |  |
| 234639_x_at  | KRTAP9-8       | -1,196375121 | -0,765504029 | -0,43087109 |  |
| 236390_at    | C20orf94       | -1,196375121 | -0,765504029 | -0,43087109 |  |
| 239847_at    | -              | -1,196375121 | -0,765504029 | -0,43087109 |  |
| 242357_x_at  | -              | -1,196375121 | -0,765504029 | -0,43087109 |  |
| 200860_s_at  | CNOT1          | 4,511038258  | 4,942014748  | -0,43097649 |  |
| 234989_at    | LOC100653017 / | 2,206540699  | 2,637603218  | -0,43106252 |  |
| 226586_at    | ANKS6          | -0,078265071 | 0,352836757  | -0,43110183 |  |
| 1552536_at   | VTI1A          | -1,763254337 | -1,332017329 | -0,43123701 |  |
| 1553196_a_at | FCRL3          | -1,763254337 | -1,332017329 | -0,43123701 |  |
| 1557786_s_at | CHIC1          | -1,763254337 | -1,332017329 | -0,43123701 |  |
| 1564203_at   | LOC147004      | -1,763254337 | -1,332017329 | -0,43123701 |  |
| 1564300_at   | IQCF5-AS1      | -1,763254337 | -1,332017329 | -0,43123701 |  |
| 203889_at    | SCG5           | -1,763254337 | -1,332017329 | -0,43123701 |  |
| 205814_at    | GRM3           | -1,763254337 | -1,332017329 | -0,43123701 |  |
| 207673_at    | NPHS1          | -1,763254337 | -1,332017329 | -0,43123701 |  |
| 209991_x_at  | GABBR2         | -1,763254337 | -1,332017329 | -0,43123701 |  |
| 214952_at    | NCAM1          | -1,763254337 | -1,332017329 | -0,43123701 |  |
| 215762_at    | -              | -1,763254337 | -1,332017329 | -0,43123701 |  |
| 219814_at    | MBNL3          | -1,763254337 | -1,332017329 | -0,43123701 |  |
| 233344_x_at  | KIAA1875       | -1,763254337 | -1,332017329 | -0,43123701 |  |
| 237669_at    | -              | -1,763254337 | -1,332017329 | -0,43123701 |  |
| 237809_at    | -              | -1,763254337 | -1,332017329 | -0,43123701 |  |
| 239779_at    | -              | -1,763254337 | -1,332017329 | -0,43123701 |  |
| 241069_at    | -              | -1,763254337 | -1,332017329 | -0,43123701 |  |
| 242501_at    | -              | -1,763254337 | -1,332017329 | -0,43123701 |  |
| 1556508_s_at | LOC100507274   | -2,64318869  | -2,211750327 | -0,43143836 |  |
| 1558392_at   | SYNE2          | -2,64318869  | -2,211750327 | -0,43143836 |  |
| 1560763_at   | -              | -2,64318869  | -2,211750327 | -0,43143836 |  |
| 1563856_at   | -              | -2,64318869  | -2,211750327 | -0,43143836 |  |
| 1567288_at   | OR5K1          | -2,64318869  | -2,211750327 | -0,43143836 |  |
| 204338_s_at  | RGS4           | -2,64318869  | -2,211750327 | -0,43143836 |  |
| 205635_at    | KALRN          | -2,64318869  | -2,211750327 | -0,43143836 |  |
| 208235_x_at  | GAGE12F /// GA | -2,64318869  | -2,211750327 | -0,43143836 |  |
| 210786_s_at  | FLI1           | -2,64318869  | -2,211750327 | -0,43143836 |  |
| 213010_at    | PRKCDBP        | -2,64318869  | -2,211750327 | -0,43143836 |  |
| 216066_at    | ABCA1          | -2,64318869  | -2,211750327 | -0,43143836 |  |
| 230797_s_at  | LOC440900      | -2,64318869  | -2,211750327 | -0,43143836 |  |
| 234853_s_at  | EFCAB6         | -2,64318869  | -2,211750327 | -0,43143836 |  |
| 237329_at    | LOC100509621   | -2,64318869  | -2,211750327 | -0,43143836 |  |
| 239975_at    | HLA-DPB2       | -2,64318869  | -2,211750327 | -0,43143836 |  |
| 244602_at    | -              | -2,64318869  | -2,211750327 | -0,43143836 |  |
| 1554327_a_at | CANT1          | 0,792179257  | 1,223626587  | -0,43144733 |  |
| 207023_x_at  | KRT10          | 0,171847695  | 0,603679647  | -0,43183195 |  |
| 220375_s_at  | -              | 0,171847695  | 0,603679647  | -0,43183195 |  |
| 224168_at    | TXNDC2         | 0,171847695  | 0,603679647  | -0,43183195 |  |
| 221666_s_at  | PYCARD         | 1,593009234  | 2,024923328  | -0,43191409 |  |
| 1569191_at   | ZNF826P        | -3,212234735 | -2,780313924 | -0,43192081 |  |
| 1570022_at   | -              | -3,212234735 | -2,780313924 | -0,43192081 |  |
| 1570168_at   | -              | -3,212234735 | -2,780313924 | -0,43192081 |  |
| 205421_at    | SLC22A3        | -3,212234735 | -2,780313924 | -0,43192081 |  |
| 208340_at    | -              | -3,212234735 | -2,780313924 | -0,43192081 |  |
| 214770_at    | MSR1           | -3,212234735 | -2,780313924 | -0,43192081 |  |
| 224093_at    | IFNK           | -3,212234735 | -2,780313924 | -0,43192081 |  |
| 234126_at    | -              | -3,212234735 | -2,780313924 | -0,43192081 |  |

|              |                  |              |              |             |  |
|--------------|------------------|--------------|--------------|-------------|--|
| 240812_at    | -                | -3,212234735 | -2,780313924 | -0,43192081 |  |
| 1561346_at   | -                | 1,764611101  | 2,196649505  | -0,4320384  |  |
| 207050_at    | CACNA2D1         | -0,85085127  | -0,41858459  | -0,43226668 |  |
| 210086_at    | HR               | -0,85085127  | -0,41858459  | -0,43226668 |  |
| 216074_x_at  | WWC1             | -0,85085127  | -0,41858459  | -0,43226668 |  |
| 207631_at    | NBR2             | -0,352951799 | 0,079428135  | -0,43237993 |  |
| 231943_at    | ZFP28            | -0,352951799 | 0,079428135  | -0,43237993 |  |
| 232089_at    | FLJ39639 /// ZNF | -0,352951799 | 0,079428135  | -0,43237993 |  |
| 1552594_at   | TMEM190          | -0,512251684 | -0,079522948 | -0,43272874 |  |
| 1553526_at   | NLRP8            | -0,512251684 | -0,079522948 | -0,43272874 |  |
| 1561595_x_at | -                | -0,512251684 | -0,079522948 | -0,43272874 |  |
| 203052_at    | C2               | -0,512251684 | -0,079522948 | -0,43272874 |  |
| 1553442_a_at | CNTNAP4          | -3,054236653 | -2,621331989 | -0,43290466 |  |
| 1555551_at   | SERPINB5         | -3,054236653 | -2,621331989 | -0,43290466 |  |
| 1556261_a_at | -                | -3,054236653 | -2,621331989 | -0,43290466 |  |
| 1565656_x_at | -                | -3,054236653 | -2,621331989 | -0,43290466 |  |
| 1566893_at   | -                | -3,054236653 | -2,621331989 | -0,43290466 |  |
| 204631_at    | MYH2 /// MYH4    | -3,054236653 | -2,621331989 | -0,43290466 |  |
| 204796_at    | EML1             | -3,054236653 | -2,621331989 | -0,43290466 |  |
| 224412_s_at  | TRPM6            | -3,054236653 | -2,621331989 | -0,43290466 |  |
| 228933_at    | NHS              | -3,054236653 | -2,621331989 | -0,43290466 |  |
| 243850_at    | -                | -3,054236653 | -2,621331989 | -0,43290466 |  |
| 211852_s_at  | ATRN             | 0,291166226  | 0,724100169  | -0,43293394 |  |
| 218359_at    | NRSN2            | 0,291166226  | 0,724100169  | -0,43293394 |  |
| 242920_at    | -                | 0,291166226  | 0,724100169  | -0,43293394 |  |
| 1558504_at   | -                | 0,682279745  | 1,115234684  | -0,43295494 |  |
| 41660_at     | CELSR1           | -0,859630159 | -0,426635367 | -0,43299479 |  |
| 214153_at    | ELOVL5           | -0,055687482 | 0,377530647  | -0,43321813 |  |
| 224011_at    | -                | -1,047650486 | -0,614371577 | -0,43327891 |  |
| 228593_at    | MTMR9LP          | -1,047650486 | -0,614371577 | -0,43327891 |  |
| 229602_at    | -                | -1,047650486 | -0,614371577 | -0,43327891 |  |
| 231025_at    | SYT7             | -1,047650486 | -0,614371577 | -0,43327891 |  |
| 231883_at    | FBXW8            | -1,047650486 | -0,614371577 | -0,43327891 |  |
| 234644_x_at  | TNFRSF10C        | -1,047650486 | -0,614371577 | -0,43327891 |  |
| 243735_at    | ELP2             | -1,047650486 | -0,614371577 | -0,43327891 |  |
| 239082_at    | FZD3             | 1,995690482  | 2,428994491  | -0,43330401 |  |
| 224992_s_at  | CMIP             | 3,149650293  | 3,583111417  | -0,43346112 |  |
| 203157_s_at  | GLS              | 0,767063567  | 1,200746069  | -0,4336825  |  |
| 236989_at    | -                | 0,767063567  | 1,200746069  | -0,4336825  |  |
| 1560080_at   | DIAPH1           | -3,32387526  | -2,89013181  | -0,43374345 |  |
| 236259_at    | STK4             | 1,496984567  | 1,930732138  | -0,43374757 |  |
| 211518_s_at  | BMP4             | 0,334552598  | 0,768343791  | -0,43379119 |  |
| 232681_at    | -                | 0,334552598  | 0,768343791  | -0,43379119 |  |
| 243656_at    | LOC642852        | 0,334552598  | 0,768343791  | -0,43379119 |  |
| 203728_at    | BAK1             | 1,251994932  | 1,685812099  | -0,43381717 |  |
| 219754_at    | RBM41            | 0,95671774   | 1,390636111  | -0,43391837 |  |
| 205688_at    | TFAP4            | 0,695652136  | 1,129843209  | -0,43419107 |  |
| 1556449_at   | -                | -0,00073712  | 0,433557298  | -0,43429442 |  |
| 1558463_s_at | LMF1             | -0,00073712  | 0,433557298  | -0,43429442 |  |
| 228802_at    | RBPM52           | -0,00073712  | 0,433557298  | -0,43429442 |  |
| 212085_at    | SLC25A6          | 5,435021809  | 5,869375685  | -0,43435388 |  |
| 200635_s_at  | PTPRF            | 0,44160593   | 0,876248481  | -0,43464255 |  |
| 231999_at    | ANKRD11          | 0,44160593   | 0,876248481  | -0,43464255 |  |
| 1560565_at   | -                | -2,597496523 | -2,162639771 | -0,43485675 |  |
| 1562389_at   | -                | -2,597496523 | -2,162639771 | -0,43485675 |  |
| 1562497_at   | -                | -2,597496523 | -2,162639771 | -0,43485675 |  |

|              |                  |              |              |             |  |
|--------------|------------------|--------------|--------------|-------------|--|
| 1562928_at   | -                | -2,597496523 | -2,162639771 | -0,43485675 |  |
| 1563685_at   | LOC285422        | -2,597496523 | -2,162639771 | -0,43485675 |  |
| 1564665_at   | -                | -2,597496523 | -2,162639771 | -0,43485675 |  |
| 1569372_at   | LOC100507194     | -2,597496523 | -2,162639771 | -0,43485675 |  |
| 203910_at    | ARHGAP29         | -2,597496523 | -2,162639771 | -0,43485675 |  |
| 206000_at    | MEP1A            | -2,597496523 | -2,162639771 | -0,43485675 |  |
| 207089_at    | NRAP             | -2,597496523 | -2,162639771 | -0,43485675 |  |
| 210179_at    | KCNJ13           | -2,597496523 | -2,162639771 | -0,43485675 |  |
| 216239_at    | BBS9             | -2,597496523 | -2,162639771 | -0,43485675 |  |
| 227566_at    | LOC100653217 /   | -2,597496523 | -2,162639771 | -0,43485675 |  |
| 232539_at    | -                | -2,597496523 | -2,162639771 | -0,43485675 |  |
| 233210_at    | FLJ12120         | -2,597496523 | -2,162639771 | -0,43485675 |  |
| 233635_at    | -                | -2,597496523 | -2,162639771 | -0,43485675 |  |
| 233792_at    | -                | -2,597496523 | -2,162639771 | -0,43485675 |  |
| 234697_x_at  | TAMM41           | -2,597496523 | -2,162639771 | -0,43485675 |  |
| 235770_at    | MASP1            | -2,597496523 | -2,162639771 | -0,43485675 |  |
| 240752_at    | LOC100287808     | -2,597496523 | -2,162639771 | -0,43485675 |  |
| 244239_at    | -                | -2,597496523 | -2,162639771 | -0,43485675 |  |
| 211484_s_at  | DSCAM            | -0,325749314 | 0,109221392  | -0,43497071 |  |
| 224037_at    | SDAD1            | -0,325749314 | 0,109221392  | -0,43497071 |  |
| 238024_at    | -                | -0,325749314 | 0,109221392  | -0,43497071 |  |
| 1557724_a_at | LOC285847        | -1,812418401 | -1,377419394 | -0,43499901 |  |
| 207443_at    | NR2E1            | -1,812418401 | -1,377419394 | -0,43499901 |  |
| 216200_at    | PLEKHM1          | -1,812418401 | -1,377419394 | -0,43499901 |  |
| 217662_x_at  | -                | -1,812418401 | -1,377419394 | -0,43499901 |  |
| 219381_at    | C5orf42          | -1,812418401 | -1,377419394 | -0,43499901 |  |
| 223159_s_at  | NEK6             | -1,812418401 | -1,377419394 | -0,43499901 |  |
| 228163_at    | ST6GALNAC4       | -1,812418401 | -1,377419394 | -0,43499901 |  |
| 229686_at    | P2RY8            | -1,812418401 | -1,377419394 | -0,43499901 |  |
| 240542_at    | -                | -1,812418401 | -1,377419394 | -0,43499901 |  |
| 242612_at    | -                | -1,812418401 | -1,377419394 | -0,43499901 |  |
| 243845_at    | HSPD1            | -1,812418401 | -1,377419394 | -0,43499901 |  |
| 202625_at    | LYN              | 4,775901501  | 5,211199987  | -0,43529849 |  |
| 1569020_at   | NEDD9            | -0,655928373 | -0,220592223 | -0,43533615 |  |
| 211502_s_at  | CDK14            | -0,655928373 | -0,220592223 | -0,43533615 |  |
| 226258_at    | AMN1             | -0,655928373 | -0,220592223 | -0,43533615 |  |
| 230929_s_at  | -                | -0,655928373 | -0,220592223 | -0,43533615 |  |
| 233483_at    | TBC1D27          | -0,655928373 | -0,220592223 | -0,43533615 |  |
| 233894_x_at  | EMID2            | -0,655928373 | -0,220592223 | -0,43533615 |  |
| 236863_at    | C17orf67         | -0,655928373 | -0,220592223 | -0,43533615 |  |
| 236007_at    | AKAP10           | 1,119359127  | 1,55481039   | -0,43545126 |  |
| 202875_s_at  | PBX2             | 2,31665944   | 2,752192409  | -0,43553297 |  |
| 200707_at    | PRKCSH           | 2,544366685  | 2,980244813  | -0,43587813 |  |
| 205387_s_at  | CGB /// CGB5 /// | -0,926850548 | -0,490927335 | -0,43592321 |  |
| 205477_s_at  | AMBP             | -0,926850548 | -0,490927335 | -0,43592321 |  |
| 231027_at    | -                | -0,926850548 | -0,490927335 | -0,43592321 |  |
| 232558_at    | LAMC3            | -0,926850548 | -0,490927335 | -0,43592321 |  |
| 238619_at    | -                | -0,926850548 | -0,490927335 | -0,43592321 |  |
| 240083_at    | MEG8             | -0,926850548 | -0,490927335 | -0,43592321 |  |
| 226379_s_at  | C19orf25         | 0,934330293  | 1,370274469  | -0,43594418 |  |
| 228847_at    | EXOC3            | 0,457392764  | 0,893473268  | -0,4360805  |  |
| 212858_at    | PAQR4            | 1,414471577  | 1,85068474   | -0,43621316 |  |
| 237864_at    | -                | 0,020670649  | 0,456918297  | -0,43624765 |  |
| 218921_at    | SIGIRR           | -0,259832361 | 0,176436073  | -0,43626843 |  |
| 1552566_at   | BTBD16           | -1,591296941 | -1,154897679 | -0,43639926 |  |
| 1552743_at   | MCF2L            | -1,591296941 | -1,154897679 | -0,43639926 |  |



|              |                   |              |              |             |  |
|--------------|-------------------|--------------|--------------|-------------|--|
| 155320_a_at  | STAB1             | -1,591296941 | -1,154897679 | -0,43639926 |  |
| 1567251_at   | OR10A3            | -1,591296941 | -1,154897679 | -0,43639926 |  |
| 203963_at    | CA12              | -1,591296941 | -1,154897679 | -0,43639926 |  |
| 217133_x_at  | CYP2B6            | -1,591296941 | -1,154897679 | -0,43639926 |  |
| 226526_s_at  | CKAP4             | -1,591296941 | -1,154897679 | -0,43639926 |  |
| 236690_at    | RHBDD1            | -1,591296941 | -1,154897679 | -0,43639926 |  |
| 236723_at    | -                 | -1,591296941 | -1,154897679 | -0,43639926 |  |
| 239894_at    | LOC100128511      | -1,591296941 | -1,154897679 | -0,43639926 |  |
| 241346_at    | ARHGAP30          | -1,591296941 | -1,154897679 | -0,43639926 |  |
| 243158_at    | -                 | -1,591296941 | -1,154897679 | -0,43639926 |  |
| 243344_at    | -                 | -1,591296941 | -1,154897679 | -0,43639926 |  |
| 235107_at    | -                 | 0,822971223  | 1,259496994  | -0,43652577 |  |
| 1553945_at   | GPHB5             | -0,759588698 | -0,322870281 | -0,43671842 |  |
| 1561497_at   | MIR3180-1 /// MIR | -0,759588698 | -0,322870281 | -0,43671842 |  |
| 1562749_at   | LOC644090         | -0,759588698 | -0,322870281 | -0,43671842 |  |
| 206938_at    | SRD5A2            | -0,759588698 | -0,322870281 | -0,43671842 |  |
| 220340_at    | GREB1L            | -0,759588698 | -0,322870281 | -0,43671842 |  |
| 224100_s_at  | DPYSL5            | -0,759588698 | -0,322870281 | -0,43671842 |  |
| 225981_at    | C17orf28          | -0,759588698 | -0,322870281 | -0,43671842 |  |
| 232505_at    | DCTN2             | -0,759588698 | -0,322870281 | -0,43671842 |  |
| 234914_at    | ZNF7              | -0,759588698 | -0,322870281 | -0,43671842 |  |
| 238757_at    | DBF4B             | -0,759588698 | -0,322870281 | -0,43671842 |  |
| 239395_at    | ARRDC3-AS1        | -0,759588698 | -0,322870281 | -0,43671842 |  |
| 208322_s_at  | ST3GAL1           | 2,107467633  | 2,544354523  | -0,43688689 |  |
| 1570414_x_at | FLJ13197          | -0,57445847  | -0,136643983 | -0,43781449 |  |
| 230358_at    | ZER1              | -0,57445847  | -0,136643983 | -0,43781449 |  |
| 220063_at    | GSTCD             | 0,20027154   | 0,638150376  | -0,43787884 |  |
| 224884_at    | AKAP13            | 0,627515113  | 1,065442793  | -0,43792768 |  |
| 201959_s_at  | MYCBP2            | 2,876321464  | 3,314541423  | -0,43821996 |  |
| 223527_s_at  | CDADC1            | 0,715481152  | 1,153866761  | -0,43838561 |  |
| 225095_at    | SPTLC2            | 2,81177561   | 3,250254796  | -0,43847919 |  |
| 1557122_s_at | GABRB2            | -3,013665402 | -2,575129729 | -0,43853567 |  |
| 230895_at    | HAPLN1            | -3,013665402 | -2,575129729 | -0,43853567 |  |
| 233602_at    | -                 | -3,013665402 | -2,575129729 | -0,43853567 |  |
| 234014_at    | NPAS3             | -3,013665402 | -2,575129729 | -0,43853567 |  |
| 235638_at    | RASSF6            | -3,013665402 | -2,575129729 | -0,43853567 |  |
| 239589_at    | -                 | -3,013665402 | -2,575129729 | -0,43853567 |  |
| 241483_at    | CLNK              | -3,013665402 | -2,575129729 | -0,43853567 |  |
| 242193_at    | LOC100130155      | -3,013665402 | -2,575129729 | -0,43853567 |  |
| 215855_s_at  | TMF1              | -0,234278768 | 0,204310755  | -0,43858952 |  |
| 217161_x_at  | ACAN              | -0,234278768 | 0,204310755  | -0,43858952 |  |
| 227389_x_at  | -                 | -0,234278768 | 0,204310755  | -0,43858952 |  |
| 230497_at    | CELF5             | -0,234278768 | 0,204310755  | -0,43858952 |  |
| 235609_at    | BRIP1             | 1,774096855  | 2,212749286  | -0,43865243 |  |
| 230637_at    | SFXN4             | 0,798390451  | 1,23718272   | -0,43879227 |  |
| 209127_s_at  | SART3             | 1,614289682  | 2,053299695  | -0,43901001 |  |
| 1554576_a_at | ETV4              | 0,641402394  | 1,080561626  | -0,43915923 |  |
| 1560300_a_at | DMRTC1 /// DMR    | 0,641402394  | 1,080561626  | -0,43915923 |  |
| 206019_at    | RBM19             | 0,641402394  | 1,080561626  | -0,43915923 |  |
| 209079_x_at  | PCDHGA1 /// PC    | 1,973904239  | 2,413157372  | -0,43925313 |  |
| 242062_at    | SAMD8             | -0,172274514 | 0,26733076   | -0,43960527 |  |
| 222483_at    | EFHD2             | 1,021868205  | 1,461646549  | -0,43977834 |  |
| 204287_at    | SYNGR1            | 0,760715727  | 1,200746069  | -0,44003034 |  |
| 1567287_at   | CLDND1            | -3,287237186 | -2,847001814 | -0,44023537 |  |
| 201200_at    | CREG1             | 3,947373951  | 4,387642594  | -0,44026864 |  |
| 223717_s_at  | ACRBP             | 1,742232072  | 2,182705233  | -0,44047316 |  |

|              |                |              |              |             |  |
|--------------|----------------|--------------|--------------|-------------|--|
| 229521_at    | CCDC71L        | 2,640847372  | 3,081412119  | -0,44056475 |  |
| 1555336_a_at | ITGA9          | -0,543051993 | -0,102100538 | -0,44095146 |  |
| 215758_x_at  | ZNF93          | 0,480753764  | 0,921731975  | -0,44097821 |  |
| 220377_at    | KIAA0125       | 2,14450783   | 2,585563171  | -0,44105534 |  |
| 1561531_at   | -              | -1,353583928 | -0,912331589 | -0,44125234 |  |
| 1565706_at   | -              | -1,353583928 | -0,912331589 | -0,44125234 |  |
| 204337_at    | RGS4           | -1,353583928 | -0,912331589 | -0,44125234 |  |
| 208530_s_at  | RARB           | -1,353583928 | -0,912331589 | -0,44125234 |  |
| 1552718_at   | DTD1           | -0,83191556  | -0,39061235  | -0,44130321 |  |
| 1564660_at   | LOC100131864   | -0,83191556  | -0,39061235  | -0,44130321 |  |
| 204923_at    | SASH3          | -0,83191556  | -0,39061235  | -0,44130321 |  |
| 213903_s_at  | RQCD1          | -0,83191556  | -0,39061235  | -0,44130321 |  |
| 214999_s_at  | RAB11FIP3      | -0,83191556  | -0,39061235  | -0,44130321 |  |
| 217373_x_at  | MDM2           | -0,83191556  | -0,39061235  | -0,44130321 |  |
| 220802_at    | KCNH4          | -0,83191556  | -0,39061235  | -0,44130321 |  |
| 232648_at    | PSMA3          | -0,83191556  | -0,39061235  | -0,44130321 |  |
| 232726_at    | -              | -0,83191556  | -0,39061235  | -0,44130321 |  |
| 235568_at    | C19orf59       | -0,83191556  | -0,39061235  | -0,44130321 |  |
| 241349_at    | -              | -0,83191556  | -0,39061235  | -0,44130321 |  |
| 205546_s_at  | TYK2           | 3,717599787  | 4,158970399  | -0,44137061 |  |
| 225950_at    | SAMD8          | 0,853119696  | 1,294497133  | -0,44137744 |  |
| 230401_at    | -              | 0,613492853  | 1,055274826  | -0,44178197 |  |
| 1567623_at   | ABLIM2         | -1,089016378 | -0,646746079 | -0,4422703  |  |
| 1569147_at   | -              | -1,089016378 | -0,646746079 | -0,4422703  |  |
| 208312_s_at  | PRAMEF1 /// PR | -1,089016378 | -0,646746079 | -0,4422703  |  |
| 217482_at    | -              | -1,089016378 | -0,646746079 | -0,4422703  |  |
| 223929_s_at  | -              | -1,089016378 | -0,646746079 | -0,4422703  |  |
| 240113_at    | -              | -1,089016378 | -0,646746079 | -0,4422703  |  |
| 240455_at    | -              | -1,089016378 | -0,646746079 | -0,4422703  |  |
| 241261_x_at  | -              | -1,089016378 | -0,646746079 | -0,4422703  |  |
| 1553293_at   | MRGPRX3        | -2,479842156 | -2,037551727 | -0,44229043 |  |
| 1562712_at   | LRRC8C         | -2,479842156 | -2,037551727 | -0,44229043 |  |
| 1565778_at   | ABCA8          | -2,479842156 | -2,037551727 | -0,44229043 |  |
| 209914_s_at  | NRXN1          | -2,479842156 | -2,037551727 | -0,44229043 |  |
| 210340_s_at  | CSF2RA         | -2,479842156 | -2,037551727 | -0,44229043 |  |
| 210770_s_at  | CACNA1A        | -2,479842156 | -2,037551727 | -0,44229043 |  |
| 215546_at    | PSMD5          | -2,479842156 | -2,037551727 | -0,44229043 |  |
| 221310_at    | FGF14          | -2,479842156 | -2,037551727 | -0,44229043 |  |
| 233076_at    | JAKMIP3        | -2,479842156 | -2,037551727 | -0,44229043 |  |
| 233364_s_at  | -              | -2,479842156 | -2,037551727 | -0,44229043 |  |
| 234608_at    | LAMA3          | -2,479842156 | -2,037551727 | -0,44229043 |  |
| 235353_at    | SEL1L3         | -2,479842156 | -2,037551727 | -0,44229043 |  |
| 244072_at    | -              | -2,479842156 | -2,037551727 | -0,44229043 |  |
| 215098_at    | RXRB           | -0,467091869 | -0,024572586 | -0,44251928 |  |
| 216019_x_at  | PHLDB1         | -0,089689931 | 0,352836757  | -0,44252669 |  |
| 209650_s_at  | TBC1D22A       | 1,369290453  | 1,811954245  | -0,44266379 |  |
| 202828_s_at  | MMP14          | 0,052199481  | 0,495031851  | -0,44283237 |  |
| 215811_at    | -              | 0,052199481  | 0,495031851  | -0,44283237 |  |
| 204351_at    | S100P          | -1,173767127 | -0,730778808 | -0,44298832 |  |
| 204498_s_at  | ADCY9          | -1,173767127 | -0,730778808 | -0,44298832 |  |
| 206948_at    | NEU3           | -1,173767127 | -0,730778808 | -0,44298832 |  |
| 211432_s_at  | TYRO3          | -1,173767127 | -0,730778808 | -0,44298832 |  |
| 221459_at    | TAAR5          | -1,173767127 | -0,730778808 | -0,44298832 |  |
| 229156_s_at  | PRKAG2-AS1     | -1,173767127 | -0,730778808 | -0,44298832 |  |
| 231348_s_at  | LMO3           | -1,173767127 | -0,730778808 | -0,44298832 |  |
| 233928_at    | ADAMTS9-AS1    | -1,173767127 | -0,730778808 | -0,44298832 |  |

|              |                 |              |              |             |  |
|--------------|-----------------|--------------|--------------|-------------|--|
| 234366_x_at  | CKAP2 /// IGLC1 | -1,173767127 | -0,730778808 | -0,44298832 |  |
| 234612_at    | -               | -1,173767127 | -0,730778808 | -0,44298832 |  |
| 238808_at    | HOXA13          | -1,173767127 | -0,730778808 | -0,44298832 |  |
| 1553179_at   | ADAMTS19        | -1,937711681 | -1,494668682 | -0,443043   |  |
| 1557825_at   | -               | -1,937711681 | -1,494668682 | -0,443043   |  |
| 1563596_at   | -               | -1,937711681 | -1,494668682 | -0,443043   |  |
| 1564242_at   | -               | -1,937711681 | -1,494668682 | -0,443043   |  |
| 201858_s_at  | SRGN            | -1,937711681 | -1,494668682 | -0,443043   |  |
| 215932_at    | MAGEC2          | -1,937711681 | -1,494668682 | -0,443043   |  |
| 223794_at    | ARMC4           | -1,937711681 | -1,494668682 | -0,443043   |  |
| 230286_at    | SLC6A11         | -1,937711681 | -1,494668682 | -0,443043   |  |
| 239019_at    | KLF12           | -1,937711681 | -1,494668682 | -0,443043   |  |
| 220308_at    | CCDC19          | 0,181384709  | 0,624460759  | -0,44307605 |  |
| 228817_at    | ALG9            | 0,181384709  | 0,624460759  | -0,44307605 |  |
| 237046_x_at  | IL34            | 0,181384709  | 0,624460759  | -0,44307605 |  |
| 242349_at    | HECTD1          | 0,57058931   | 1,013870809  | -0,4432815  |  |
| 205883_at    | ZBTB16          | 1,722769813  | 2,166264721  | -0,44349491 |  |
| 208286_x_at  | POU5F1 /// POU5 | 1,274448124  | 1,718396606  | -0,44394848 |  |
| 206563_s_at  | OPRL1           | -0,221656139 | 0,222599095  | -0,44425523 |  |
| 228559_at    | CENPN           | 2,59519831   | 3,039473081  | -0,44427477 |  |
| 1552782_at   | SLC44A5         | -2,779459409 | -2,335104118 | -0,44435529 |  |
| 1557286_at   | -               | -2,779459409 | -2,335104118 | -0,44435529 |  |
| 1558496_at   | LOC100505609    | -2,779459409 | -2,335104118 | -0,44435529 |  |
| 1564721_at   | -               | -2,779459409 | -2,335104118 | -0,44435529 |  |
| 1569362_at   | ALCAM           | -2,779459409 | -2,335104118 | -0,44435529 |  |
| 214519_s_at  | RLN2            | -2,779459409 | -2,335104118 | -0,44435529 |  |
| 223317_at    | ALKBH7          | -2,779459409 | -2,335104118 | -0,44435529 |  |
| 228592_at    | MS4A1           | -2,779459409 | -2,335104118 | -0,44435529 |  |
| 231721_at    | JAM3            | -2,779459409 | -2,335104118 | -0,44435529 |  |
| 234368_at    | -               | -2,779459409 | -2,335104118 | -0,44435529 |  |
| 236791_at    | -               | -2,779459409 | -2,335104118 | -0,44435529 |  |
| 237890_at    | -               | -2,779459409 | -2,335104118 | -0,44435529 |  |
| 239665_at    | LOC441179       | -2,779459409 | -2,335104118 | -0,44435529 |  |
| 240265_at    | TRAF3IP3        | -2,779459409 | -2,335104118 | -0,44435529 |  |
| 243488_at    | -               | -2,779459409 | -2,335104118 | -0,44435529 |  |
| 1494_f_at    | CYP2A6          | -0,066915199 | 0,377530656  | -0,44444586 |  |
| 232911_at    | ZFP14           | 0,072842263  | 0,51742585   | -0,44458359 |  |
| 242425_at    | -               | 0,555999837  | 1,000684521  | -0,44468468 |  |
| 212492_s_at  | KDM4B           | 1,621313976  | 2,066015817  | -0,44470184 |  |
| 226685_at    | SNTB2           | 0,123193849  | 0,568365095  | -0,44517125 |  |
| 214073_at    | CTTN            | -0,43775896  | 0,007421914  | -0,44518087 |  |
| 221673_s_at  | CSNK1G1         | -0,43775896  | 0,007421914  | -0,44518087 |  |
| 222800_at    | TRNAU1AP        | -0,43775896  | 0,007421914  | -0,44518087 |  |
| 240600_at    | -               | -0,43775896  | 0,007421914  | -0,44518087 |  |
| 240664_at    | -               | -0,43775896  | 0,007421914  | -0,44518087 |  |
| 222599_s_at  | NAV2            | 0,246434561  | 0,691645685  | -0,44521112 |  |
| 224163_s_at  | DMAP1           | 1,504602299  | 1,950068772  | -0,44546647 |  |
| 225982_at    | UBTF            | 1,689737652  | 2,135226207  | -0,44548856 |  |
| 225998_at    | GAB1            | 0,503742507  | 0,949447784  | -0,44570528 |  |
| 1555499_a_at | IL28RA          | 0,401366113  | 0,847075464  | -0,44570935 |  |
| 214464_at    | CDC42BPA        | 0,401366113  | 0,847075464  | -0,44570935 |  |
| 212192_at    | KCTD12          | 0,291166226  | 0,73688026   | -0,44571403 |  |
| 1552616_a_at | ACACB           | -0,79540287  | -0,34958478  | -0,44581809 |  |
| 1557623_at   | -               | -0,79540287  | -0,34958478  | -0,44581809 |  |
| 1570588_at   | -               | -0,79540287  | -0,34958478  | -0,44581809 |  |
| 202707_at    | UMPS            | -0,79540287  | -0,34958478  | -0,44581809 |  |

|              |                   |              |              |             |  |
|--------------|-------------------|--------------|--------------|-------------|--|
| 206679_at    | APBA1             | -0,79540287  | -0,34958478  | -0,44581809 |  |
| 215322_at    | LONRF1            | -0,79540287  | -0,34958478  | -0,44581809 |  |
| 218677_at    | S100A14           | -0,79540287  | -0,34958478  | -0,44581809 |  |
| 233449_at    | -                 | -0,79540287  | -0,34958478  | -0,44581809 |  |
| 236370_at    | -                 | -0,79540287  | -0,34958478  | -0,44581809 |  |
| 238064_at    | -                 | -0,79540287  | -0,34958478  | -0,44581809 |  |
| 205749_at    | CYP1A1            | -0,366776884 | 0,079428135  | -0,44620502 |  |
| 208217_at    | GABRR2            | -0,366776884 | 0,079428135  | -0,44620502 |  |
| 210256_s_at  | PIP5K1A           | -0,366776884 | 0,079428135  | -0,44620502 |  |
| 235894_at    | -                 | 0,984222186  | 1,43051703   | -0,44629484 |  |
| 1560577_at   | -                 | -0,196756757 | 0,249604176  | -0,44636093 |  |
| 1569700_s_at | AK7               | -0,196756757 | 0,249604176  | -0,44636093 |  |
| 224766_at    | LOC100506548 /    | -0,196756757 | 0,249604176  | -0,44636093 |  |
| 240008_at    | -                 | -0,196756757 | 0,249604176  | -0,44636093 |  |
| 1557985_s_at | CEP78             | 1,168140757  | 1,614891062  | -0,4467503  |  |
| 1569464_at   | PPFIBP1           | -0,136301282 | 0,310717132  | -0,44701841 |  |
| 224406_s_at  | FCRL5             | -0,136301282 | 0,310717132  | -0,44701841 |  |
| 1557987_at   | -                 | 0,417596971  | 0,864649967  | -0,447053   |  |
| 1562093_at   | -                 | -2,359436556 | -1,912089812 | -0,44734674 |  |
| 1562349_at   | TRAPPC2           | -2,359436556 | -1,912089812 | -0,44734674 |  |
| 1567334_at   | -                 | -2,359436556 | -1,912089812 | -0,44734674 |  |
| 1569399_at   | -                 | -2,359436556 | -1,912089812 | -0,44734674 |  |
| 206222_at    | TNFRSF10C         | -2,359436556 | -1,912089812 | -0,44734674 |  |
| 206897_at    | PAGE1             | -2,359436556 | -1,912089812 | -0,44734674 |  |
| 210033_s_at  | SPAG6             | -2,359436556 | -1,912089812 | -0,44734674 |  |
| 216351_x_at  | DAZ1 /// DAZ2 /// | -2,359436556 | -1,912089812 | -0,44734674 |  |
| 217134_at    | MTAP              | -2,359436556 | -1,912089812 | -0,44734674 |  |
| 223235_s_at  | SMOC2             | -2,359436556 | -1,912089812 | -0,44734674 |  |
| 228796_at    | CPNE4             | -2,359436556 | -1,912089812 | -0,44734674 |  |
| 229560_at    | TLR8              | -2,359436556 | -1,912089812 | -0,44734674 |  |
| 230159_at    | C1orf115          | -2,359436556 | -1,912089812 | -0,44734674 |  |
| 234017_at    | LOC91948          | -2,359436556 | -1,912089812 | -0,44734674 |  |
| 236491_at    | BCL2L10           | -2,359436556 | -1,912089812 | -0,44734674 |  |
| 205606_at    | LRP6              | 0,457392764  | 0,904843258  | -0,44745049 |  |
| 228125_at    | ZSCAN30           | 1,426552034  | 1,874012195  | -0,44746016 |  |
| 204804_at    | TRIM21            | 1,699726954  | 2,147243253  | -0,4475163  |  |
| 213799_s_at  | PTPRA             | 0,798390451  | 1,246149888  | -0,44775944 |  |
| 1556168_s_at | HEATR7B1          | -2,063149277 | -1,615132408 | -0,44801687 |  |
| 1558982_at   | ANKRD20A12P       | -2,063149277 | -1,615132408 | -0,44801687 |  |
| 1561245_at   | -                 | -2,063149277 | -1,615132408 | -0,44801687 |  |
| 1561610_at   | -                 | -2,063149277 | -1,615132408 | -0,44801687 |  |
| 1562455_at   | -                 | -2,063149277 | -1,615132408 | -0,44801687 |  |
| 211442_x_at  | CYP3A43           | -2,063149277 | -1,615132408 | -0,44801687 |  |
| 238269_at    | -                 | -2,063149277 | -1,615132408 | -0,44801687 |  |
| 241970_at    | -                 | -2,063149277 | -1,615132408 | -0,44801687 |  |
| 242716_at    | SLC30A1           | -2,063149277 | -1,615132408 | -0,44801687 |  |
| 243072_at    | -                 | -2,063149277 | -1,615132408 | -0,44801687 |  |
| 206982_at    | CRYBA1            | -2,311268652 | -1,862647763 | -0,44862089 |  |
| 208280_at    | CDRT1             | -2,311268652 | -1,862647763 | -0,44862089 |  |
| 211473_s_at  | COL4A6            | -2,311268652 | -1,862647763 | -0,44862089 |  |
| 215360_at    | -                 | -2,311268652 | -1,862647763 | -0,44862089 |  |
| 215520_at    | PYGO1             | -2,311268652 | -1,862647763 | -0,44862089 |  |
| 216447_at    | -                 | -2,311268652 | -1,862647763 | -0,44862089 |  |
| 233561_at    | SH3TC2            | -2,311268652 | -1,862647763 | -0,44862089 |  |
| 234424_at    | -                 | -2,311268652 | -1,862647763 | -0,44862089 |  |
| 239357_at    | ATP2B2            | -2,311268652 | -1,862647763 | -0,44862089 |  |

|             |                |              |              |             |  |
|-------------|----------------|--------------|--------------|-------------|--|
| 240948_at   | -              | -2,311268652 | -1,862647763 | -0,44862089 |  |
| 242014_at   | -              | -2,311268652 | -1,862647763 | -0,44862089 |  |
| 242481_at   | -              | -2,311268652 | -1,862647763 | -0,44862089 |  |
| 243268_at   | PATE2          | -2,311268652 | -1,862647763 | -0,44862089 |  |
| 230985_at   | C9orf131       | 0,03125738   | 0,479907041  | -0,44864966 |  |
| 227733_at   | TMEM63C        | 0,810733188  | 1,259496994  | -0,44876381 |  |
| 203126_at   | IMPA2          | -1,399512875 | -0,950686014 | -0,44882686 |  |
| 209260_at   | SFN            | -1,399512875 | -0,950686014 | -0,44882686 |  |
| 229952_at   | -              | -1,399512875 | -0,950686014 | -0,44882686 |  |
| 231100_at   | RRAD           | -1,399512875 | -0,950686014 | -0,44882686 |  |
| 237650_at   | -              | -1,399512875 | -0,950686014 | -0,44882686 |  |
| 241222_at   | -              | -1,399512875 | -0,950686014 | -0,44882686 |  |
| 209958_s_at | BBS9           | -0,706943342 | -0,258114234 | -0,44882911 |  |
| 211823_s_at | PXN            | -0,706943342 | -0,258114234 | -0,44882911 |  |
| 216211_at   | -              | -0,706943342 | -0,258114234 | -0,44882911 |  |
| 223910_at   | ERN2           | -0,112808516 | 0,336136178  | -0,44894469 |  |
| 210586_x_at | RHD            | 0,728550685  | 1,177496821  | -0,44894614 |  |
| 225907_at   | LOC728743      | 0,083054335  | 0,532164371  | -0,44911004 |  |
| 225696_at   | COPS7B         | 1,549482847  | 1,998633167  | -0,44915032 |  |
| 205843_x_at | CRAT           | 0,641402394  | 1,090553537  | -0,44915114 |  |
| 1556030_at  | LOC100652925 / | -0,055687482 | 0,393761504  | -0,44944899 |  |
| 240168_at   | XPO7           | -0,055687482 | 0,393761504  | -0,44944899 |  |
| 243682_at   | -              | -0,055687482 | 0,393761504  | -0,44944899 |  |
| 232617_at   | CTSS           | 0,900083947  | 1,349621332  | -0,44953738 |  |
| 231101_at   | -              | 1,000476627  | 1,450051551  | -0,44957492 |  |
| 1561144_at  | -              | -2,236765673 | -1,787089803 | -0,44967587 |  |
| 1566576_at  | -              | -2,236765673 | -1,787089803 | -0,44967587 |  |
| 1566735_at  | -              | -2,236765673 | -1,787089803 | -0,44967587 |  |
| 206440_at   | LIN7A          | -2,236765673 | -1,787089803 | -0,44967587 |  |
| 208244_at   | BMP3           | -2,236765673 | -1,787089803 | -0,44967587 |  |
| 210641_at   | CAPN9          | -2,236765673 | -1,787089803 | -0,44967587 |  |
| 220392_at   | EBF2           | -2,236765673 | -1,787089803 | -0,44967587 |  |
| 229326_at   | TNFSF13        | -2,236765673 | -1,787089803 | -0,44967587 |  |
| 233494_at   | ERBB4          | -2,236765673 | -1,787089803 | -0,44967587 |  |
| 234802_at   | -              | -2,236765673 | -1,787089803 | -0,44967587 |  |
| 237636_at   | PPP2R2A        | -2,236765673 | -1,787089803 | -0,44967587 |  |
| 239899_at   | RNF145         | -2,236765673 | -1,787089803 | -0,44967587 |  |
| 241495_at   | CCNL1          | -2,236765673 | -1,787089803 | -0,44967587 |  |
| 243396_at   | -              | -2,236765673 | -1,787089803 | -0,44967587 |  |
| 232834_at   | -              | 0,822971223  | 1,272721751  | -0,44975053 |  |
| 1554672_at  | TTC26          | -2,187914861 | -1,738067356 | -0,44984751 |  |
| 1556306_at  | -              | -2,187914861 | -1,738067356 | -0,44984751 |  |
| 1560757_at  | TOP1MT         | -2,187914861 | -1,738067356 | -0,44984751 |  |
| 1561424_at  | -              | -2,187914861 | -1,738067356 | -0,44984751 |  |
| 1566149_at  | CALML4         | -2,187914861 | -1,738067356 | -0,44984751 |  |
| 1569999_at  | -              | -2,187914861 | -1,738067356 | -0,44984751 |  |
| 203180_at   | ALDH1A3        | -2,187914861 | -1,738067356 | -0,44984751 |  |
| 206268_at   | LEFTY1         | -2,187914861 | -1,738067356 | -0,44984751 |  |
| 219415_at   | TTYH1          | -2,187914861 | -1,738067356 | -0,44984751 |  |
| 221398_at   | TAS2R8         | -2,187914861 | -1,738067356 | -0,44984751 |  |
| 227760_at   | IGFBPL1        | -2,187914861 | -1,738067356 | -0,44984751 |  |
| 237609_at   | -              | -2,187914861 | -1,738067356 | -0,44984751 |  |
| 240272_at   | -              | -2,187914861 | -1,738067356 | -0,44984751 |  |
| 243283_at   | CROT           | -2,187914861 | -1,738067356 | -0,44984751 |  |
| 244570_at   | -              | -2,187914861 | -1,738067356 | -0,44984751 |  |
| 1570033_at  | WIPI2          | -1,71423189  | -1,264005341 | -0,45022655 |  |

|              |                |              |              |             |  |
|--------------|----------------|--------------|--------------|-------------|--|
| 205538_at    | CORO2A         | -1,71423189  | -1,264005341 | -0,45022655 |  |
| 205902_at    | KCNN3          | -1,71423189  | -1,264005341 | -0,45022655 |  |
| 208294_x_at  | CSHL1          | -1,71423189  | -1,264005341 | -0,45022655 |  |
| 214417_s_at  | FETUB          | -1,71423189  | -1,264005341 | -0,45022655 |  |
| 222205_x_at  | FAM182B        | -1,71423189  | -1,264005341 | -0,45022655 |  |
| 230612_at    | WDR73          | -1,71423189  | -1,264005341 | -0,45022655 |  |
| 231569_at    | TMEM31         | -1,71423189  | -1,264005341 | -0,45022655 |  |
| 234237_s_at  | AMBRA1         | -1,71423189  | -1,264005341 | -0,45022655 |  |
| 235458_at    | HAVCR2         | -1,71423189  | -1,264005341 | -0,45022655 |  |
| 236135_at    | PNPLA7         | -1,71423189  | -1,264005341 | -0,45022655 |  |
| 237606_at    | CD53           | -1,71423189  | -1,264005341 | -0,45022655 |  |
| 240036_at    | SEC14L1        | -1,71423189  | -1,264005341 | -0,45022655 |  |
| 1562045_at   | -              | -0,986356909 | -0,536087151 | -0,45026976 |  |
| 1566137_s_at | -              | -0,986356909 | -0,536087151 | -0,45026976 |  |
| 1566973_at   | -              | -0,986356909 | -0,536087151 | -0,45026976 |  |
| 1568907_at   | -              | -0,986356909 | -0,536087151 | -0,45026976 |  |
| 203969_at    | PEX3           | -0,986356909 | -0,536087151 | -0,45026976 |  |
| 205186_at    | DNALI1         | -0,986356909 | -0,536087151 | -0,45026976 |  |
| 218484_at    | NDUFA4L2       | -0,986356909 | -0,536087151 | -0,45026976 |  |
| 238660_at    | WDFY3          | -0,986356909 | -0,536087151 | -0,45026976 |  |
| 241488_at    | -              | -0,986356909 | -0,536087151 | -0,45026976 |  |
| 218500_at    | THEM6          | 0,384950573  | 0,835239052  | -0,45028848 |  |
| 220104_at    | ZC3HAV1        | 1,129248302  | 1,579853228  | -0,45060493 |  |
| 232248_at    | LOC100652768 / | 0,273439642  | 0,724100169  | -0,45066053 |  |
| 226727_at    | CISD3          | 0,152582607  | 0,603679647  | -0,45109704 |  |
| 238980_x_at  | C17orf56       | -0,033456564 | 0,417770464  | -0,45122703 |  |
| 1560920_s_at | -              | -1,131062212 | -0,679763839 | -0,45129837 |  |
| 216701_at    | C1orf68        | -1,131062212 | -0,679763839 | -0,45129837 |  |
| 221369_at    | MTNR1A         | -1,131062212 | -0,679763839 | -0,45129837 |  |
| 237882_at    | -              | -1,131062212 | -0,679763839 | -0,45129837 |  |
| 239149_at    | -              | -1,131062212 | -0,679763839 | -0,45129837 |  |
| 240165_at    | -              | -1,131062212 | -0,679763839 | -0,45129837 |  |
| 240201_at    | -              | -1,131062212 | -0,679763839 | -0,45129837 |  |
| 209568_s_at  | RGL1           | -0,423248115 | 0,028364014  | -0,45161213 |  |
| 235487_at    | -              | -0,423248115 | 0,028364014  | -0,45161213 |  |
| 236934_at    | -              | -0,423248115 | 0,028364014  | -0,45161213 |  |
| 238422_at    | LBX2-AS1       | -0,423248115 | 0,028364014  | -0,45161213 |  |
| 1554642_at   | RNF32          | -0,67289328  | -0,220592223 | -0,45230106 |  |
| 1555475_x_at | TTLL3          | -0,67289328  | -0,220592223 | -0,45230106 |  |
| 210838_s_at  | ACVRL1         | -0,67289328  | -0,220592223 | -0,45230106 |  |
| 221417_x_at  | S1PR5          | -0,67289328  | -0,220592223 | -0,45230106 |  |
| 228074_at    | ITPRIPL2       | -0,67289328  | -0,220592223 | -0,45230106 |  |
| 232776_at    | -              | -0,67289328  | -0,220592223 | -0,45230106 |  |
| 226817_at    | DSC2           | 1,774096855  | 2,226407528  | -0,45231067 |  |
| 219958_at    | TMEM74B        | 0,334552598  | 0,786897721  | -0,45234512 |  |
| 1555421_at   | AP1S3          | -3,342483913 | -2,89013181  | -0,4523521  |  |
| 206201_s_at  | MEOX2          | -3,342483913 | -2,89013181  | -0,4523521  |  |
| 1556432_at   | -              | -1,308181863 | -0,855751026 | -0,45243084 |  |
| 207453_s_at  | DNAJB5         | -1,308181863 | -0,855751026 | -0,45243084 |  |
| 212339_at    | EPB41L1        | -1,308181863 | -0,855751026 | -0,45243084 |  |
| 221905_at    | CYLD           | -1,308181863 | -0,855751026 | -0,45243084 |  |
| 228511_s_at  | -              | -1,308181863 | -0,855751026 | -0,45243084 |  |
| 231144_at    | SMARCD3        | -1,308181863 | -0,855751026 | -0,45243084 |  |
| 234415_x_at  | -              | -1,308181863 | -0,855751026 | -0,45243084 |  |
| 234526_at    | OR51B6         | -1,308181863 | -0,855751026 | -0,45243084 |  |
| 236631_at    | LINC00319      | -1,308181863 | -0,855751026 | -0,45243084 |  |

|              |                |              |              |             |  |
|--------------|----------------|--------------|--------------|-------------|--|
| 239110_s_at  | -              | -1,308181863 | -0,855751026 | -0,45243084 |  |
| 240507_at    | -              | -1,308181863 | -0,855751026 | -0,45243084 |  |
| 244868_at    | -              | -1,308181863 | -0,855751026 | -0,45243084 |  |
| 1556629_a_at | SNAP25         | -2,908843709 | -2,456406426 | -0,45243728 |  |
| 1561856_at   | -              | -2,908843709 | -2,456406426 | -0,45243728 |  |
| 1561864_at   | -              | -2,908843709 | -2,456406426 | -0,45243728 |  |
| 1569332_at   | LINC00488      | -2,908843709 | -2,456406426 | -0,45243728 |  |
| 1570444_at   | LOC643201      | -2,908843709 | -2,456406426 | -0,45243728 |  |
| 201645_at    | TNC            | -2,908843709 | -2,456406426 | -0,45243728 |  |
| 215702_s_at  | CFTR           | -2,908843709 | -2,456406426 | -0,45243728 |  |
| 219643_at    | LRP1B          | -2,908843709 | -2,456406426 | -0,45243728 |  |
| 221305_s_at  | UGT1A8 /// UGT | -2,908843709 | -2,456406426 | -0,45243728 |  |
| 231220_at    | CELF4          | -2,908843709 | -2,456406426 | -0,45243728 |  |
| 231494_at    | -              | -2,908843709 | -2,456406426 | -0,45243728 |  |
| 232399_at    | DCLK3          | -2,908843709 | -2,456406426 | -0,45243728 |  |
| 234399_at    | -              | -2,908843709 | -2,456406426 | -0,45243728 |  |
| 234563_at    | -              | -2,908843709 | -2,456406426 | -0,45243728 |  |
| 239984_at    | -              | -2,908843709 | -2,456406426 | -0,45243728 |  |
| 241807_x_at  | -              | -2,908843709 | -2,456406426 | -0,45243728 |  |
| 242059_at    | -              | -2,908843709 | -2,456406426 | -0,45243728 |  |
| 242502_at    | KCNH5          | -2,908843709 | -2,456406426 | -0,45243728 |  |
| 202023_at    | EFNA1          | 0,171847695  | 0,624460759  | -0,45261306 |  |
| 221878_at    | C2orf68        | 0,171847695  | 0,624460759  | -0,45261306 |  |
| 211162_x_at  | SCD            | 1,995690482  | 2,448549499  | -0,45285902 |  |
| 232012_at    | CAPN1          | 1,795990708  | 2,248887791  | -0,45289708 |  |
| 37549_g_at   | BBS9           | -1,098292679 | -0,645253516 | -0,45303916 |  |
| 1559156_at   | -              | 0,661985843  | 1,115234684  | -0,45324884 |  |
| 203201_at    | PMM2           | 1,373456798  | 1,826973888  | -0,45351709 |  |
| 1559776_at   | -              | 0,87091093   | 1,324440845  | -0,45352992 |  |
| 1557617_at   | DCTN1-AS1      | -3,07502285  | -2,621331989 | -0,45369086 |  |
| 205978_at    | KL             | -3,07502285  | -2,621331989 | -0,45369086 |  |
| 233505_at    | -              | -3,07502285  | -2,621331989 | -0,45369086 |  |
| 240401_at    | -              | -3,07502285  | -2,621331989 | -0,45369086 |  |
| 221870_at    | EHD2           | 0,760715727  | 1,214517879  | -0,45380215 |  |
| 201335_s_at  | ARHGEF12       | -0,59053611  | -0,136643983 | -0,45389213 |  |
| 218960_at    | TMPRSS4        | -0,59053611  | -0,136643983 | -0,45389213 |  |
| 231087_at    | -              | -0,59053611  | -0,136643983 | -0,45389213 |  |
| 242783_at    | -              | -0,59053611  | -0,136643983 | -0,45389213 |  |
| 1566535_at   | -              | -0,394749123 | 0,059218869  | -0,45396799 |  |
| 207576_x_at  | OXT            | -0,394749123 | 0,059218869  | -0,45396799 |  |
| 210185_at    | CACNB1         | -0,394749123 | 0,059218869  | -0,45396799 |  |
| 1555497_a_at | CYP4B1         | -0,325749314 | 0,128747141  | -0,45449645 |  |
| 230880_at    | KIAA1652       | -0,325749314 | 0,128747141  | -0,45449645 |  |
| 243738_at    | NMNAT3         | -0,325749314 | 0,128747141  | -0,45449645 |  |
| 239404_at    | -              | 1,556829052  | 2,011838132  | -0,45500908 |  |
| 1555332_at   | TPH2           | -2,667025278 | -2,211750327 | -0,45527495 |  |
| 1556334_s_at | -              | -2,667025278 | -2,211750327 | -0,45527495 |  |
| 1557451_at   | DGCR10         | -2,667025278 | -2,211750327 | -0,45527495 |  |
| 1558756_at   | C2CD3          | -2,667025278 | -2,211750327 | -0,45527495 |  |
| 1560163_at   | -              | -2,667025278 | -2,211750327 | -0,45527495 |  |
| 1561217_at   | -              | -2,667025278 | -2,211750327 | -0,45527495 |  |
| 1561948_at   | COQ10B         | -2,667025278 | -2,211750327 | -0,45527495 |  |
| 1562501_at   | LOC255177      | -2,667025278 | -2,211750327 | -0,45527495 |  |
| 1566963_at   | -              | -2,667025278 | -2,211750327 | -0,45527495 |  |
| 1569585_at   | -              | -2,667025278 | -2,211750327 | -0,45527495 |  |
| 213222_at    | PLCB1          | -2,667025278 | -2,211750327 | -0,45527495 |  |

|              |              |              |              |             |  |
|--------------|--------------|--------------|--------------|-------------|--|
| 215320_at    | FAM75C2      | -2,667025278 | -2,211750327 | -0,45527495 |  |
| 220736_at    | SLC19A3      | -2,667025278 | -2,211750327 | -0,45527495 |  |
| 232795_at    | -            | -2,667025278 | -2,211750327 | -0,45527495 |  |
| 236289_at    | LOC100506563 | -2,667025278 | -2,211750327 | -0,45527495 |  |
| 244592_at    | -            | -2,667025278 | -2,211750327 | -0,45527495 |  |
| 244775_at    | -            | -2,667025278 | -2,211750327 | -0,45527495 |  |
| 235003_at    | UHMK1        | 1,841816345  | 2,297144887  | -0,45532854 |  |
| 1554453_at   | HNRPLL       | -0,946847173 | -0,490927335 | -0,45591984 |  |
| 214747_at    | ZBED4        | -0,946847173 | -0,490927335 | -0,45591984 |  |
| 220579_at    | -            | -0,946847173 | -0,490927335 | -0,45591984 |  |
| 229279_at    | -            | -0,946847173 | -0,490927335 | -0,45591984 |  |
| 232611_at    | GOLGA2P5     | -0,946847173 | -0,490927335 | -0,45591984 |  |
| 243477_at    | ATG10        | -0,946847173 | -0,490927335 | -0,45591984 |  |
| 243947_s_at  | -            | -0,946847173 | -0,490927335 | -0,45591984 |  |
| 228918_at    | -            | -0,022466681 | 0,433557298  | -0,45602398 |  |
| 227101_at    | ZNF800       | 2,288253583  | 2,744302548  | -0,45604896 |  |
| 218208_at    | PQLC1        | 1,46610492   | 1,922365006  | -0,45626009 |  |
| 227054_at    | N6AMT2       | 2,16388051   | 2,620464265  | -0,45658376 |  |
| 216932_at    | -            | -0,299034815 | 0,157549243  | -0,45658406 |  |
| 231272_at    | MED7         | -0,299034815 | 0,157549243  | -0,45658406 |  |
| 215202_at    | GUSBP11      | 0,503742507  | 0,960386719  | -0,45664421 |  |
| 1552783_at   | ZNF417       | -3,192553003 | -2,735862426 | -0,45669058 |  |
| 210194_at    | PLA2R1       | -3,192553003 | -2,735862426 | -0,45669058 |  |
| 238393_at    | -            | -3,192553003 | -2,735862426 | -0,45669058 |  |
| 1555348_at   | TFAP2E       | 0,181384709  | 0,638150376  | -0,45676567 |  |
| 206789_s_at  | POU2F1       | 1,339784194  | 1,796776588  | -0,45699239 |  |
| 221915_s_at  | RANBP1       | 0,359971644  | 0,817300337  | -0,45732869 |  |
| 1561786_at   | -            | -2,866296344 | -2,408705138 | -0,45759121 |  |
| 1563572_at   | LOC152274    | -2,866296344 | -2,408705138 | -0,45759121 |  |
| 202342_s_at  | TRIM2        | -2,866296344 | -2,408705138 | -0,45759121 |  |
| 213662_at    | -            | -2,866296344 | -2,408705138 | -0,45759121 |  |
| 230429_at    | ASPH         | -2,866296344 | -2,408705138 | -0,45759121 |  |
| 233575_s_at  | TLE4         | -2,866296344 | -2,408705138 | -0,45759121 |  |
| 236201_at    | -            | -2,866296344 | -2,408705138 | -0,45759121 |  |
| 243915_at    | -            | -2,866296344 | -2,408705138 | -0,45759121 |  |
| 213466_at    | RAB40C       | -0,00073712  | 0,456918297  | -0,45765542 |  |
| 203249_at    | EZH1         | 0,518867317  | 0,976641161  | -0,45777384 |  |
| 209253_at    | SORBS3       | 0,518867317  | 0,976641161  | -0,45777384 |  |
| 225504_at    | HMBOX1       | 2,654607516  | 3,112391743  | -0,45778423 |  |
| 1570166_a_at | -            | 0,900083947  | 1,3579181    | -0,45783415 |  |
| 228247_at    | LOC283788    | 0,900083947  | 1,3579181    | -0,45783415 |  |
| 205906_at    | FOXJ1        | -0,741668563 | -0,283667828 | -0,45800074 |  |
| 208071_s_at  | LAIR1        | -0,741668563 | -0,283667828 | -0,45800074 |  |
| 223612_s_at  | LNK1         | -0,741668563 | -0,283667828 | -0,45800074 |  |
| 232344_at    | -            | -0,741668563 | -0,283667828 | -0,45800074 |  |
| 237482_s_at  | ACAD10       | -0,741668563 | -0,283667828 | -0,45800074 |  |
| 241185_at    | SAE1         | -0,741668563 | -0,283667828 | -0,45800074 |  |
| 242875_at    | -            | -0,741668563 | -0,283667828 | -0,45800074 |  |
| 208823_s_at  | CDK16        | 2,077135162  | 2,53523821   | -0,45810305 |  |
| 1552337_s_at | HOXD4        | 0,246434561  | 0,704715219  | -0,45828066 |  |
| 228149_at    | C7orf60      | 3,27186005   | 3,730171924  | -0,45831187 |  |
| 209873_s_at  | PKP3         | 0,376672223  | 0,835239052  | -0,45856683 |  |
| 228020_at    | PTCD3        | 1,767779954  | 2,226407528  | -0,45862757 |  |
| 1558636_s_at | ADAMTS5      | -3,41365796  | -2,954576755 | -0,4590812  |  |
| 1562250_at   | -            | -3,41365796  | -2,954576755 | -0,4590812  |  |
| 225452_at    | MED1         | 1,485482016  | 1,944570415  | -0,4590884  |  |



|              |                 |              |              |             |  |
|--------------|-----------------|--------------|--------------|-------------|--|
| 211017_s_at  | NF2             | 0,020670649  | 0,479907041  | -0,45923639 |  |
| 1553647_at   | CDYL2           | 0,072842263  | 0,532164371  | -0,45932211 |  |
| 36545_s_at   | SFI1            | 0,503742576  | 0,963108543  | -0,45936597 |  |
| 218829_s_at  | CHD7            | 2,868962815  | 3,32832922   | -0,45936641 |  |
| 230605_at    | -               | 0,30867765   | 0,768343791  | -0,45966614 |  |
| 1560870_a_at | -               | -1,026571149 | -0,566887459 | -0,45968369 |  |
| 213022_s_at  | UTRN            | -1,026571149 | -0,566887459 | -0,45968369 |  |
| 219370_at    | RPRM            | -1,026571149 | -0,566887459 | -0,45968369 |  |
| 222218_s_at  | PILRA           | -1,026571149 | -0,566887459 | -0,45968369 |  |
| 224139_at    | SHANK2-AS3      | -1,026571149 | -0,566887459 | -0,45968369 |  |
| 225873_at    | TYSND1          | -1,026571149 | -0,566887459 | -0,45968369 |  |
| 233623_at    | -               | -1,026571149 | -0,566887459 | -0,45968369 |  |
| 241381_at    | CXorf36         | -1,026571149 | -0,566887459 | -0,45968369 |  |
| 1562632_at   | LOC285191       | -0,655928373 | -0,19610998  | -0,45981839 |  |
| 205806_at    | ROM1            | -0,655928373 | -0,19610998  | -0,45981839 |  |
| 219136_s_at  | LMF1            | -0,655928373 | -0,19610998  | -0,45981839 |  |
| 219669_at    | CD177           | -0,655928373 | -0,19610998  | -0,45981839 |  |
| 238507_at    | -               | -0,655928373 | -0,19610998  | -0,45981839 |  |
| 242972_at    | -               | -0,655928373 | -0,19610998  | -0,45981839 |  |
| 230387_at    | -               | 1,655931423  | 2,115788273  | -0,45985685 |  |
| 203199_s_at  | MTRR            | 1,462198073  | 1,922365006  | -0,46016693 |  |
| 1556584_at   | -               | -0,85085127  | -0,39061235  | -0,46023892 |  |
| 210552_s_at  | RALGPS1         | -0,85085127  | -0,39061235  | -0,46023892 |  |
| 221204_s_at  | CRTAC1          | -0,85085127  | -0,39061235  | -0,46023892 |  |
| 223956_at    | TMPRSS13        | -0,85085127  | -0,39061235  | -0,46023892 |  |
| 244221_at    | -               | -0,85085127  | -0,39061235  | -0,46023892 |  |
| 1555824_a_at | PACS2           | 1,094335495  | 1,55481039   | -0,4604749  |  |
| 1568617_a_at | CAMSAP3         | -1,470833215 | -1,010192375 | -0,46064084 |  |
| 201616_s_at  | CALD1           | -1,470833215 | -1,010192375 | -0,46064084 |  |
| 206527_at    | ABAT            | -1,470833215 | -1,010192375 | -0,46064084 |  |
| 212598_at    | WDFY3           | -1,470833215 | -1,010192375 | -0,46064084 |  |
| 215970_at    | LOC100130331    | -1,470833215 | -1,010192375 | -0,46064084 |  |
| 221284_s_at  | SRC             | -1,470833215 | -1,010192375 | -0,46064084 |  |
| 226722_at    | FAM20C          | -1,470833215 | -1,010192375 | -0,46064084 |  |
| 232699_at    | -               | -1,470833215 | -1,010192375 | -0,46064084 |  |
| 234774_at    | R3HDML          | -1,470833215 | -1,010192375 | -0,46064084 |  |
| 243967_at    | AFF3            | -1,470833215 | -1,010192375 | -0,46064084 |  |
| 1553666_at   | CCDC34          | -1,838812296 | -1,377419394 | -0,4613929  |  |
| 1556924_at   | CFLAR-AS1       | -1,838812296 | -1,377419394 | -0,4613929  |  |
| 1558356_at   | UACA            | -1,838812296 | -1,377419394 | -0,4613929  |  |
| 1560435_at   | -               | -1,838812296 | -1,377419394 | -0,4613929  |  |
| 1562512_at   | SMPDL3A         | -1,838812296 | -1,377419394 | -0,4613929  |  |
| 204582_s_at  | KLK3            | -1,838812296 | -1,377419394 | -0,4613929  |  |
| 208273_at    | ZNF670 /// ZNF6 | -1,838812296 | -1,377419394 | -0,4613929  |  |
| 216906_at    | ST14            | -1,838812296 | -1,377419394 | -0,4613929  |  |
| 220901_at    | GPR157          | -1,838812296 | -1,377419394 | -0,4613929  |  |
| 223872_at    | -               | -1,838812296 | -1,377419394 | -0,4613929  |  |
| 232627_at    | HGS             | -1,838812296 | -1,377419394 | -0,4613929  |  |
| 233310_at    | -               | -1,838812296 | -1,377419394 | -0,4613929  |  |
| 237934_at    | -               | -1,838812296 | -1,377419394 | -0,4613929  |  |
| 241742_at    | PRAM1           | -1,838812296 | -1,377419394 | -0,4613929  |  |
| 236760_at    | AMMECR1         | 1,426552034  | 1,888402606  | -0,46185057 |  |
| 212358_at    | CLIP3           | 0,384950573  | 0,847075464  | -0,46212489 |  |
| 1553399_a_at | C17orf69        | -0,352951799 | 0,109221392  | -0,46217319 |  |
| 209823_x_at  | HLA-DQB1 /// LO | -0,352951799 | 0,109221392  | -0,46217319 |  |
| 231228_at    | BCL2L1          | 0,209623097  | 0,67181667   | -0,46219357 |  |

|              |                |              |              |             |  |
|--------------|----------------|--------------|--------------|-------------|--|
| 1569521_s_at | -              | -0,285837228 | 0,176436073  | -0,4622733  |  |
| 208890_s_at  | PLXNB2         | -0,285837228 | 0,176436073  | -0,4622733  |  |
| 218509_at    | LPPR2          | 1,549482847  | 2,011838132  | -0,46235529 |  |
| 1555408_at   | BAGE2 /// BAGE | -0,622910612 | -0,160136748 | -0,46277386 |  |
| 1564785_at   | C14orf183      | -0,622910612 | -0,160136748 | -0,46277386 |  |
| 204801_s_at  | DHRS12         | -0,622910612 | -0,160136748 | -0,46277386 |  |
| 219364_at    | DHX58          | -0,622910612 | -0,160136748 | -0,46277386 |  |
| 239304_at    | MFSD4          | -0,622910612 | -0,160136748 | -0,46277386 |  |
| 242200_at    | ADAMTSL5       | -0,622910612 | -0,160136748 | -0,46277386 |  |
| 221003_s_at  | CAB39L         | 0,592200562  | 1,055274826  | -0,46307426 |  |
| 228173_at    | GNAS           | 1,318332599  | 1,781437557  | -0,46310496 |  |
| 237648_x_at  | -              | -3,15396682  | -2,690860744 | -0,46310608 |  |
| 215013_s_at  | USP34          | 0,401366113  | 0,864649967  | -0,46328385 |  |
| 205646_s_at  | PAX6           | -0,543051993 | -0,079522948 | -0,46352904 |  |
| 214171_s_at  | U2AF2          | -0,543051993 | -0,079522948 | -0,46352904 |  |
| 221464_at    | OR1D2          | -0,543051993 | -0,079522948 | -0,46352904 |  |
| 240255_at    | LOC100507395   | 0,03125738   | 0,495031851  | -0,46377447 |  |
| 223291_at    | MRPS15         | -0,196756757 | 0,26733076   | -0,46408752 |  |
| 203167_at    | TIMP2          | -0,259832361 | 0,204310755  | -0,46414312 |  |
| 213818_x_at  | TMEM223        | -0,259832361 | 0,204310755  | -0,46414312 |  |
| 214505_s_at  | FHL1           | -0,259832361 | 0,204310755  | -0,46414312 |  |
| 1552496_a_at | COBL           | -2,551294263 | -2,086984744 | -0,46430952 |  |
| 1558653_at   | MLK7-AS1       | -2,551294263 | -2,086984744 | -0,46430952 |  |
| 1563471_at   | EPG5           | -2,551294263 | -2,086984744 | -0,46430952 |  |
| 1570005_at   | -              | -2,551294263 | -2,086984744 | -0,46430952 |  |
| 206999_at    | IL12RB2        | -2,551294263 | -2,086984744 | -0,46430952 |  |
| 219962_at    | ACE2           | -2,551294263 | -2,086984744 | -0,46430952 |  |
| 224546_at    | -              | -2,551294263 | -2,086984744 | -0,46430952 |  |
| 229596_at    | AMDHD1         | -2,551294263 | -2,086984744 | -0,46430952 |  |
| 232705_at    | LRRFIP2        | -2,551294263 | -2,086984744 | -0,46430952 |  |
| 235860_at    | -              | -2,551294263 | -2,086984744 | -0,46430952 |  |
| 237619_at    | FAM217A        | -2,551294263 | -2,086984744 | -0,46430952 |  |
| 238587_at    | UBASH3B        | -2,551294263 | -2,086984744 | -0,46430952 |  |
| 239449_at    | -              | -2,551294263 | -2,086984744 | -0,46430952 |  |
| 242986_at    | NAV1           | -2,551294263 | -2,086984744 | -0,46430952 |  |
| 240175_at    | -              | 0,934330293  | 1,398700978  | -0,46437069 |  |
| 208052_x_at  | CEACAM3        | 0,291166226  | 0,755840599  | -0,46467437 |  |
| 229592_at    | LOC100507501   | 0,291166226  | 0,755840599  | -0,46467437 |  |
| 1552737_s_at | WWP2           | -1,888254346 | -1,423348341 | -0,464906   |  |
| 1554719_at   | NDUFA10        | -1,888254346 | -1,423348341 | -0,464906   |  |
| 1569474_at   | -              | -1,888254346 | -1,423348341 | -0,464906   |  |
| 205713_s_at  | COMP           | -1,888254346 | -1,423348341 | -0,464906   |  |
| 206832_s_at  | SEMA3F         | -1,888254346 | -1,423348341 | -0,464906   |  |
| 210606_x_at  | KLRD1          | -1,888254346 | -1,423348341 | -0,464906   |  |
| 215406_at    | -              | -1,888254346 | -1,423348341 | -0,464906   |  |
| 215730_at    | VGLL1          | -1,888254346 | -1,423348341 | -0,464906   |  |
| 225345_s_at  | FBXO32         | -1,888254346 | -1,423348341 | -0,464906   |  |
| 227154_at    | IGSF21         | -1,888254346 | -1,423348341 | -0,464906   |  |
| 231497_at    | ZBTB20-AS1     | -1,888254346 | -1,423348341 | -0,464906   |  |
| 232759_at    | -              | -1,888254346 | -1,423348341 | -0,464906   |  |
| 233685_at    | -              | -1,888254346 | -1,423348341 | -0,464906   |  |
| 236577_at    | -              | -1,888254346 | -1,423348341 | -0,464906   |  |
| 238128_at    | TMEM200C       | -1,888254346 | -1,423348341 | -0,464906   |  |
| 240385_at    | -              | -1,888254346 | -1,423348341 | -0,464906   |  |
| 1568949_at   | PITPNC1        | 0,052199481  | 0,51742585   | -0,46522637 |  |
| 1563975_at   | RNF130         | -0,926850548 | -0,461594427 | -0,46525612 |  |

|              |               |              |              |             |  |
|--------------|---------------|--------------|--------------|-------------|--|
| 206109_at    | FUT1          | -0,926850548 | -0,461594427 | -0,46525612 |  |
| 210444_at    | NPY6R         | -0,926850548 | -0,461594427 | -0,46525612 |  |
| 220887_at    | C14orf162     | -0,926850548 | -0,461594427 | -0,46525612 |  |
| 232897_at    | FLJ20444      | -0,926850548 | -0,461594427 | -0,46525612 |  |
| 238215_at    | SLC6A18       | -0,926850548 | -0,461594427 | -0,46525612 |  |
| 242866_x_at  | POU2F2        | -0,926850548 | -0,461594427 | -0,46525612 |  |
| 1552923_a_at | PITPNM2       | -1,2845686   | -0,819238336 | -0,46533026 |  |
| 1564620_at   | -             | -1,2845686   | -0,819238336 | -0,46533026 |  |
| 201042_at    | TGM2          | -1,2845686   | -0,819238336 | -0,46533026 |  |
| 205272_s_at  | PRH1 /// PRH2 | -1,2845686   | -0,819238336 | -0,46533026 |  |
| 216597_at    | -             | -1,2845686   | -0,819238336 | -0,46533026 |  |
| 217548_at    | LOC100129502  | -1,2845686   | -0,819238336 | -0,46533026 |  |
| 239055_at    | -             | -1,2845686   | -0,819238336 | -0,46533026 |  |
| 240126_x_at  | -             | -1,2845686   | -0,819238336 | -0,46533026 |  |
| 240872_at    | -             | -1,2845686   | -0,819238336 | -0,46533026 |  |
| 38892_at     | KIAA0240      | 1,01921154   | 1,484560668  | -0,46534913 |  |
| 1552686_at   | C20orf152     | -1,196375121 | -0,730778808 | -0,46559631 |  |
| 1561436_at   | -             | -1,196375121 | -0,730778808 | -0,46559631 |  |
| 1566232_at   | -             | -1,196375121 | -0,730778808 | -0,46559631 |  |
| 204684_at    | NPTX1         | -1,196375121 | -0,730778808 | -0,46559631 |  |
| 223851_s_at  | TNFRSF18      | -1,196375121 | -0,730778808 | -0,46559631 |  |
| 228213_at    | H2AFJ         | -1,196375121 | -0,730778808 | -0,46559631 |  |
| 230518_at    | MPZL2         | -1,196375121 | -0,730778808 | -0,46559631 |  |
| 232224_at    | MASP1         | -1,196375121 | -0,730778808 | -0,46559631 |  |
| 234055_s_at  | GZF1          | -1,196375121 | -0,730778808 | -0,46559631 |  |
| 236500_at    | -             | -1,196375121 | -0,730778808 | -0,46559631 |  |
| 219951_s_at  | DZANK1        | -0,112808516 | 0,352836757  | -0,46564527 |  |
| 237739_at    | -             | -0,112808516 | 0,352836757  | -0,46564527 |  |
| 218819_at    | INTS6         | 2,790121796  | 3,255815291  | -0,4656935  |  |
| 1560137_at   | -             | -0,172274514 | 0,293518836  | -0,46579335 |  |
| 1565696_at   | -             | -0,172274514 | 0,293518836  | -0,46579335 |  |
| 1560199_x_at | -             | -0,512251684 | -0,046302147 | -0,46594954 |  |
| 1565843_s_at | BRPF3         | -0,512251684 | -0,046302147 | -0,46594954 |  |
| 223845_at    | VSIG10        | -0,512251684 | -0,046302147 | -0,46594954 |  |
| 231120_x_at  | PKIB          | -0,512251684 | -0,046302147 | -0,46594954 |  |
| 1563943_at   | PPARGC1B      | -0,43775896  | 0,028364014  | -0,46612297 |  |
| 226552_at    | IER5L         | -0,43775896  | 0,028364014  | -0,46612297 |  |
| 234286_at    | PPP1R12C      | -0,43775896  | 0,028364014  | -0,46612297 |  |
| 224968_at    | CCDC104       | 1,982112682  | 2,448549499  | -0,46643682 |  |
| 212739_s_at  | NME4          | 2,919702154  | 3,386261038  | -0,46655888 |  |
| 211056_s_at  | SRD5A1        | 1,926486359  | 2,39311332   | -0,46662696 |  |
| 202723_s_at  | FOXO1         | 1,261018186  | 1,728030156  | -0,46701197 |  |
| 243496_at    | RAB18         | -0,033456564 | 0,433557298  | -0,46701386 |  |
| 1562084_at   | -             | -2,504600601 | -2,037551727 | -0,46704887 |  |
| 1563565_at   | INPP5B        | -2,504600601 | -2,037551727 | -0,46704887 |  |
| 215889_at    | SKIL          | -2,504600601 | -2,037551727 | -0,46704887 |  |
| 228194_s_at  | SORCS1        | -2,504600601 | -2,037551727 | -0,46704887 |  |
| 235735_at    | TNFSF8        | -2,504600601 | -2,037551727 | -0,46704887 |  |
| 223057_s_at  | XPO5          | 2,433006244  | 2,900133867  | -0,46712762 |  |
| 1569906_s_at | PHF20         | -0,089689931 | 0,377530647  | -0,46722058 |  |
| 205944_s_at  | CLTCL1        | -0,089689931 | 0,377530647  | -0,46722058 |  |
| 239555_at    | -             | -0,089689931 | 0,377530647  | -0,46722058 |  |
| 241054_at    | -             | -0,089689931 | 0,377530647  | -0,46722058 |  |
| 243020_at    | -             | -0,089689931 | 0,377530647  | -0,46722058 |  |
| 227260_at    | -             | 1,603688695  | 2,071071048  | -0,46738235 |  |
| 1556269_at   | MYT1          | -1,518072576 | -1,050406615 | -0,46766596 |  |

|              |                |              |              |             |  |
|--------------|----------------|--------------|--------------|-------------|--|
| 1560995_s_at | -              | -1,518072576 | -1,050406615 | -0,46766596 |  |
| 211195_s_at  | TP63           | -1,518072576 | -1,050406615 | -0,46766596 |  |
| 216401_x_at  | -              | -1,518072576 | -1,050406615 | -0,46766596 |  |
| 217308_at    | OR1F2P         | -1,518072576 | -1,050406615 | -0,46766596 |  |
| 239125_at    | SLC25A5-AS1    | -1,518072576 | -1,050406615 | -0,46766596 |  |
| 240519_at    | -              | -1,518072576 | -1,050406615 | -0,46766596 |  |
| 240783_at    | -              | -1,518072576 | -1,050406615 | -0,46766596 |  |
| 241719_at    | DIAPH3         | -1,518072576 | -1,050406615 | -0,46766596 |  |
| 243616_at    | -              | -1,518072576 | -1,050406615 | -0,46766596 |  |
| 219122_s_at  | THG1L          | 2,043538949  | 2,511262629  | -0,46772368 |  |
| 226957_x_at  | RALBP1         | 0,661985843  | 1,129843209  | -0,46785737 |  |
| 1555132_at   | -              | -1,688127507 | -1,220210588 | -0,46791692 |  |
| 1558117_s_at | USP31          | -1,688127507 | -1,220210588 | -0,46791692 |  |
| 1560042_at   | FAM82A1        | -1,688127507 | -1,220210588 | -0,46791692 |  |
| 205827_at    | CCK            | -1,688127507 | -1,220210588 | -0,46791692 |  |
| 215733_x_at  | CTAG2          | -1,688127507 | -1,220210588 | -0,46791692 |  |
| 218332_at    | BEX1           | -1,688127507 | -1,220210588 | -0,46791692 |  |
| 223902_at    | NEFM           | -1,688127507 | -1,220210588 | -0,46791692 |  |
| 230979_at    | -              | -1,688127507 | -1,220210588 | -0,46791692 |  |
| 232864_s_at  | AFF4           | -1,688127507 | -1,220210588 | -0,46791692 |  |
| 236801_at    | -              | -1,688127507 | -1,220210588 | -0,46791692 |  |
| 237539_at    | -              | -1,688127507 | -1,220210588 | -0,46791692 |  |
| 206845_s_at  | RNF40          | 1,990274687  | 2,458228496  | -0,46795381 |  |
| 201340_s_at  | ENC1           | 1,454352496  | 1,922365006  | -0,46801251 |  |
| 215693_x_at  | DDX27          | 3,171349466  | 3,639498476  | -0,46814901 |  |
| 221235_s_at  | TGFBRAP1       | 1,233777334  | 1,702196344  | -0,46841901 |  |
| 1561087_at   | -              | -2,972500237 | -2,503677622 | -0,46882261 |  |
| 1563536_at   | -              | -2,972500237 | -2,503677622 | -0,46882261 |  |
| 204471_at    | GAP43          | -2,972500237 | -2,503677622 | -0,46882261 |  |
| 215729_s_at  | VGLL1          | -2,972500237 | -2,503677622 | -0,46882261 |  |
| 231626_at    | TPH1           | -2,972500237 | -2,503677622 | -0,46882261 |  |
| 243601_at    | LOC285957      | -2,972500237 | -2,503677622 | -0,46882261 |  |
| 226156_at    | AKT2           | 1,883312263  | 2,352169913  | -0,46885765 |  |
| 201072_s_at  | SMARCC1        | 2,344516784  | 2,813804482  | -0,4692877  |  |
| 234359_at    | -              | 0,57058931   | 1,039887232  | -0,46929792 |  |
| 1563369_at   | LINC00173      | -1,964176657 | -1,494668682 | -0,46950798 |  |
| 1565582_at   | -              | -1,964176657 | -1,494668682 | -0,46950798 |  |
| 1566229_a_at | -              | -1,964176657 | -1,494668682 | -0,46950798 |  |
| 1567241_at   | OR2L1P         | -1,964176657 | -1,494668682 | -0,46950798 |  |
| 1569996_at   | ANKRD26P3      | -1,964176657 | -1,494668682 | -0,46950798 |  |
| 217351_at    | -              | -1,964176657 | -1,494668682 | -0,46950798 |  |
| 219902_at    | BHMT2          | -1,964176657 | -1,494668682 | -0,46950798 |  |
| 225150_s_at  | RTKN           | -1,964176657 | -1,494668682 | -0,46950798 |  |
| 233545_at    | -              | -1,964176657 | -1,494668682 | -0,46950798 |  |
| 233765_at    | -              | -1,964176657 | -1,494668682 | -0,46950798 |  |
| 235924_at    | -              | -1,964176657 | -1,494668682 | -0,46950798 |  |
| 237844_at    | LOC100506639 / | -1,964176657 | -1,494668682 | -0,46950798 |  |
| 242078_at    | -              | -1,964176657 | -1,494668682 | -0,46950798 |  |
| 243227_at    | -              | -1,964176657 | -1,494668682 | -0,46950798 |  |
| 243577_at    | -              | -1,964176657 | -1,494668682 | -0,46950798 |  |
| 244593_at    | C17orf28       | -1,964176657 | -1,494668682 | -0,46950798 |  |
| 227749_at    | POU2F2         | 0,317354302  | 0,786897721  | -0,46954342 |  |
| 215014_at    | KCND3          | -3,250025915 | -2,780313924 | -0,46971199 |  |
| 215924_at    | -              | -3,250025915 | -2,780313924 | -0,46971199 |  |
| 232804_at    | LOC100506385   | -3,250025915 | -2,780313924 | -0,46971199 |  |
| 243277_x_at  | MECOM          | -3,250025915 | -2,780313924 | -0,46971199 |  |

|              |                 |              |              |             |  |
|--------------|-----------------|--------------|--------------|-------------|--|
| 213018_at    | GATAD1          | 1,850809354  | 2,320681318  | -0,46987196 |  |
| 1556659_at   | -               | -2,756478458 | -2,286583451 | -0,46989501 |  |
| 1559141_s_at | FAM87A /// FAM8 | -2,756478458 | -2,286583451 | -0,46989501 |  |
| 209740_s_at  | PNPLA4          | -2,756478458 | -2,286583451 | -0,46989501 |  |
| 217214_s_at  | SLC6A2          | -2,756478458 | -2,286583451 | -0,46989501 |  |
| 236544_at    | -               | -2,756478458 | -2,286583451 | -0,46989501 |  |
| 242979_at    | IRS1            | -2,756478458 | -2,286583451 | -0,46989501 |  |
| 243803_at    | LOC643037       | -2,756478458 | -2,286583451 | -0,46989501 |  |
| 1557232_at   | -               | -0,888496123 | -0,41858459  | -0,46991153 |  |
| 205080_at    | RARB            | -0,888496123 | -0,41858459  | -0,46991153 |  |
| 222123_s_at  | HIF3A           | -0,888496123 | -0,41858459  | -0,46991153 |  |
| 236724_at    | CFC1            | -0,888496123 | -0,41858459  | -0,46991153 |  |
| 221049_s_at  | POLL            | 0,767063567  | 1,23718272   | -0,47011915 |  |
| 218436_at    | SIL1            | 1,46610492   | 1,936283387  | -0,47017847 |  |
| 228680_at    | KIF3A           | 1,789769151  | 2,259997914  | -0,47022876 |  |
| 1553205_at   | C20orf166-AS1   | 0,083054335  | 0,553993624  | -0,47093929 |  |
| 206926_s_at  | IL11            | 0,083054335  | 0,553993624  | -0,47093929 |  |
| 213854_at    | SYNGR1          | 0,083054335  | 0,553993624  | -0,47093929 |  |
| 242294_at    | FBXO45          | 0,083054335  | 0,553993624  | -0,47093929 |  |
| 1555624_a_at | SSH1            | -2,43257096  | -1,961547147 | -0,47102381 |  |
| 1555636_at   | CD300LG         | -2,43257096  | -1,961547147 | -0,47102381 |  |
| 1562546_at   | -               | -2,43257096  | -1,961547147 | -0,47102381 |  |
| 207677_s_at  | NCF4            | -2,43257096  | -1,961547147 | -0,47102381 |  |
| 209618_at    | CTNND2          | -2,43257096  | -1,961547147 | -0,47102381 |  |
| 215904_at    | MLLT4           | -2,43257096  | -1,961547147 | -0,47102381 |  |
| 216649_at    | RREB1           | -2,43257096  | -1,961547147 | -0,47102381 |  |
| 216963_s_at  | GAP43           | -2,43257096  | -1,961547147 | -0,47102381 |  |
| 220701_at    | LINC00216       | -2,43257096  | -1,961547147 | -0,47102381 |  |
| 221445_at    | OR1A2           | -2,43257096  | -1,961547147 | -0,47102381 |  |
| 233259_at    | CCDC48          | -2,43257096  | -1,961547147 | -0,47102381 |  |
| 234497_s_at  | -               | -2,43257096  | -1,961547147 | -0,47102381 |  |
| 239950_at    | HOXA11-AS       | -2,43257096  | -1,961547147 | -0,47102381 |  |
| 241118_at    | LINC00462       | -2,43257096  | -1,961547147 | -0,47102381 |  |
| 226954_at    | UBE2R2          | 1,119359127  | 1,590454215  | -0,47109509 |  |
| 206741_at    | C3orf32         | -0,221656139 | 0,249604176  | -0,47126031 |  |
| 233768_at    | -               | -0,221656139 | 0,249604176  | -0,47126031 |  |
| 244855_at    | -               | -0,221656139 | 0,249604176  | -0,47126031 |  |
| 244358_at    | -               | 0,20027154   | 0,67181667   | -0,47154513 |  |
| 1561089_at   | -               | -2,01371626  | -1,541908042 | -0,47180822 |  |
| 1561187_at   | -               | -2,01371626  | -1,541908042 | -0,47180822 |  |
| 1567011_at   | -               | -2,01371626  | -1,541908042 | -0,47180822 |  |
| 215385_at    | -               | -2,01371626  | -1,541908042 | -0,47180822 |  |
| 216818_s_at  | OR2J2           | -2,01371626  | -1,541908042 | -0,47180822 |  |
| 227736_at    | C10orf99        | -2,01371626  | -1,541908042 | -0,47180822 |  |
| 229675_at    | MINA            | -2,01371626  | -1,541908042 | -0,47180822 |  |
| 232121_at    | TRDMT1          | -2,01371626  | -1,541908042 | -0,47180822 |  |
| 232701_at    | -               | -2,01371626  | -1,541908042 | -0,47180822 |  |
| 235655_at    | -               | -2,01371626  | -1,541908042 | -0,47180822 |  |
| 236589_at    | ZNF701          | -2,01371626  | -1,541908042 | -0,47180822 |  |
| 243645_at    | NFASC           | -2,01371626  | -1,541908042 | -0,47180822 |  |
| 244609_at    | -               | -2,01371626  | -1,541908042 | -0,47180822 |  |
| 244619_at    | LOC646626       | -2,01371626  | -1,541908042 | -0,47180822 |  |
| 215849_x_at  | TTC18           | 0,152582607  | 0,624460759  | -0,47187815 |  |
| 213605_s_at  | -               | 3,520355937  | 3,992437318  | -0,47208138 |  |
| 202463_s_at  | MBD3            | 1,638726528  | 2,110887591  | -0,47216106 |  |
| 227167_s_at  | RASSF3          | 2,127340679  | 2,599625088  | -0,47228441 |  |

|              |                 |              |              |             |  |
|--------------|-----------------|--------------|--------------|-------------|--|
| 236567_at    | -               | -0,57445847  | -0,102100538 | -0,47235793 |  |
| 219469_at    | DYNC2H1         | -0,496991414 | -0,024572586 | -0,47241883 |  |
| 1569325_at   | ARPC5           | -0,79540287  | -0,322870281 | -0,47253259 |  |
| 222952_s_at  | TLR7            | -0,79540287  | -0,322870281 | -0,47253259 |  |
| 223906_s_at  | TEX101          | -0,79540287  | -0,322870281 | -0,47253259 |  |
| 243269_s_at  | FAM205A /// FAM | -0,79540287  | -0,322870281 | -0,47253259 |  |
| 1553859_at   | TPH1            | -2,384869671 | -1,912089812 | -0,47277986 |  |
| 1560370_x_at | ANKH            | -2,384869671 | -1,912089812 | -0,47277986 |  |
| 1561191_at   | -               | -2,384869671 | -1,912089812 | -0,47277986 |  |
| 1563057_at   | -               | -2,384869671 | -1,912089812 | -0,47277986 |  |
| 1565975_at   | -               | -2,384869671 | -1,912089812 | -0,47277986 |  |
| 1569263_at   | -               | -2,384869671 | -1,912089812 | -0,47277986 |  |
| 215463_at    | OR7E24          | -2,384869671 | -1,912089812 | -0,47277986 |  |
| 215953_at    | DKFZP564C196    | -2,384869671 | -1,912089812 | -0,47277986 |  |
| 224289_s_at  | VN1R10P         | -2,384869671 | -1,912089812 | -0,47277986 |  |
| 229421_s_at  | RBM47           | -2,384869671 | -1,912089812 | -0,47277986 |  |
| 229657_at    | THRB            | -2,384869671 | -1,912089812 | -0,47277986 |  |
| 232580_x_at  | -               | -2,384869671 | -1,912089812 | -0,47277986 |  |
| 235751_s_at  | VMO1            | -2,384869671 | -1,912089812 | -0,47277986 |  |
| 238365_s_at  | C1orf228        | -2,384869671 | -1,912089812 | -0,47277986 |  |
| 238462_at    | UBASH3B         | -2,384869671 | -1,912089812 | -0,47277986 |  |
| 243393_at    | C17orf64        | -2,384869671 | -1,912089812 | -0,47277986 |  |
| 231960_at    | BRWD1           | 1,485482016  | 1,958277216  | -0,4727952  |  |
| 219098_at    | MYBBP1A         | 2,352981171  | 2,825817328  | -0,47283616 |  |
| 217312_s_at  | COL7A1          | 0,503742507  | 0,976641161  | -0,47289865 |  |
| 1555164_at   | KIF26B          | -1,424023738 | -0,950686014 | -0,47333772 |  |
| 1555773_at   | BPIFC           | -1,424023738 | -0,950686014 | -0,47333772 |  |
| 1562074_a_at | UNC13C          | -1,424023738 | -0,950686014 | -0,47333772 |  |
| 1564479_a_at | -               | -1,424023738 | -0,950686014 | -0,47333772 |  |
| 204430_s_at  | SLC2A5          | -1,424023738 | -0,950686014 | -0,47333772 |  |
| 208241_at    | NRG1            | -1,424023738 | -0,950686014 | -0,47333772 |  |
| 208409_at    | SLC14A2         | -1,424023738 | -0,950686014 | -0,47333772 |  |
| 210533_at    | MSH4            | -1,424023738 | -0,950686014 | -0,47333772 |  |
| 215340_at    | ADCY1           | -1,424023738 | -0,950686014 | -0,47333772 |  |
| 219567_s_at  | DEM1            | -1,424023738 | -0,950686014 | -0,47333772 |  |
| 220443_s_at  | VAX2            | -1,424023738 | -0,950686014 | -0,47333772 |  |
| 222935_x_at  | SLC39A8         | -1,424023738 | -0,950686014 | -0,47333772 |  |
| 230348_at    | LATS2           | -1,424023738 | -0,950686014 | -0,47333772 |  |
| 230967_s_at  | -               | -1,424023738 | -0,950686014 | -0,47333772 |  |
| 231436_at    | -               | -1,424023738 | -0,950686014 | -0,47333772 |  |
| 237603_at    | C1orf100        | -1,424023738 | -0,950686014 | -0,47333772 |  |
| 237638_at    | -               | -1,424023738 | -0,950686014 | -0,47333772 |  |
| 237639_at    | TMEM207         | -1,424023738 | -0,950686014 | -0,47333772 |  |
| 238325_s_at  | ODF3B           | -1,424023738 | -0,950686014 | -0,47333772 |  |
| 238947_at    | -               | -1,424023738 | -0,950686014 | -0,47333772 |  |
| 225466_at    | PATL1           | 3,091402928  | 3,565308644  | -0,47390572 |  |
| 243910_x_at  | CAND1           | 1,269985355  | 1,743944487  | -0,47395913 |  |
| 242414_at    | QPRT            | 2,247975581  | 2,721978587  | -0,47400301 |  |
| 1560897_a_at | KRTAP10-11      | -0,394749123 | 0,079428135  | -0,47417726 |  |
| 238754_at    | -               | -0,394749123 | 0,079428135  | -0,47417726 |  |
| 1558571_at   | LOC100505963    | -2,930741289 | -2,456406426 | -0,47433486 |  |
| 1561575_at   | -               | -2,930741289 | -2,456406426 | -0,47433486 |  |
| 1564209_at   | LOC282980       | -2,930741289 | -2,456406426 | -0,47433486 |  |
| 1564449_at   | -               | -2,930741289 | -2,456406426 | -0,47433486 |  |
| 1569779_at   | -               | -2,930741289 | -2,456406426 | -0,47433486 |  |
| 205029_s_at  | FABP7           | -2,930741289 | -2,456406426 | -0,47433486 |  |

|              |                  |              |              |             |  |
|--------------|------------------|--------------|--------------|-------------|--|
| 230923_at    | FAM19A1          | -2,930741289 | -2,456406426 | -0,47433486 |  |
| 236768_at    | LOC100128139     | -2,930741289 | -2,456406426 | -0,47433486 |  |
| 244745_at    | RERG             | -2,930741289 | -2,456406426 | -0,47433486 |  |
| 1558924_s_at | CLIP1            | -2,089474779 | -1,615132408 | -0,47434237 |  |
| 1562918_at   | -                | -2,089474779 | -1,615132408 | -0,47434237 |  |
| 1563897_at   | CRABP1           | -2,089474779 | -1,615132408 | -0,47434237 |  |
| 205109_s_at  | ARHGEF4          | -2,089474779 | -1,615132408 | -0,47434237 |  |
| 206932_at    | CH25H            | -2,089474779 | -1,615132408 | -0,47434237 |  |
| 207617_at    | DDX3X            | -2,089474779 | -1,615132408 | -0,47434237 |  |
| 216162_at    | SBNO1            | -2,089474779 | -1,615132408 | -0,47434237 |  |
| 216327_s_at  | SIGLEC8          | -2,089474779 | -1,615132408 | -0,47434237 |  |
| 216940_x_at  | YBX1             | -2,089474779 | -1,615132408 | -0,47434237 |  |
| 216959_x_at  | NRCAM            | -2,089474779 | -1,615132408 | -0,47434237 |  |
| 224294_at    | LOC100128185     | -2,089474779 | -1,615132408 | -0,47434237 |  |
| 233587_s_at  | SIPA1L2          | -2,089474779 | -1,615132408 | -0,47434237 |  |
| 240240_at    | -                | -2,089474779 | -1,615132408 | -0,47434237 |  |
| 240758_at    | -                | -2,089474779 | -1,615132408 | -0,47434237 |  |
| 243032_at    | -                | -2,089474779 | -1,615132408 | -0,47434237 |  |
| 244102_at    | -                | -2,089474779 | -1,615132408 | -0,47434237 |  |
| 244832_at    | -                | -2,089474779 | -1,615132408 | -0,47434237 |  |
| 242614_at    | -                | 0,020670649  | 0,495031851  | -0,4743612  |  |
| 155559_s_at  | USP25            | -0,467091869 | 0,007421914  | -0,47451378 |  |
| 1561616_a_at | DNAH6            | 1,201332287  | 1,675891488  | -0,4745592  |  |
| 1552935_at   | ZCCHC5           | -1,089016378 | -0,614371577 | -0,4746448  |  |
| 206329_at    | EXTL1            | -1,089016378 | -0,614371577 | -0,4746448  |  |
| 221133_s_at  | CLDN18           | -1,089016378 | -0,614371577 | -0,4746448  |  |
| 237513_at    | PRSS58           | -1,089016378 | -0,614371577 | -0,4746448  |  |
| 1561313_at   | -                | -1,240169874 | -0,765504029 | -0,47466585 |  |
| 205977_s_at  | EPHA1            | -1,240169874 | -0,765504029 | -0,47466585 |  |
| 206179_s_at  | TPPP             | -1,240169874 | -0,765504029 | -0,47466585 |  |
| 207540_s_at  | SYK              | -1,240169874 | -0,765504029 | -0,47466585 |  |
| 208194_s_at  | STAM2            | -1,240169874 | -0,765504029 | -0,47466585 |  |
| 229628_s_at  | C9orf174 /// LOC | -1,240169874 | -0,765504029 | -0,47466585 |  |
| 230668_at    | NKAIN4           | -1,240169874 | -0,765504029 | -0,47466585 |  |
| 232821_at    | GTSF1L           | -1,240169874 | -0,765504029 | -0,47466585 |  |
| 234768_at    | -                | -1,240169874 | -0,765504029 | -0,47466585 |  |
| 235517_at    | PACRGL           | -1,240169874 | -0,765504029 | -0,47466585 |  |
| 239518_at    | -                | -1,240169874 | -0,765504029 | -0,47466585 |  |
| 239703_at    | -                | -1,240169874 | -0,765504029 | -0,47466585 |  |
| 240024_at    | SEC14L2          | -1,240169874 | -0,765504029 | -0,47466585 |  |
| 240886_at    | CASR             | -1,240169874 | -0,765504029 | -0,47466585 |  |
| 1557362_at   | PHIP             | 0,359971644  | 0,835239052  | -0,47526741 |  |
| 213135_at    | TIAM1            | 0,359971644  | 0,835239052  | -0,47526741 |  |
| 1554331_a_at | LRRC18           | -2,138804305 | -1,663414495 | -0,47538981 |  |
| 1556826_s_at | C1orf187         | -2,138804305 | -1,663414495 | -0,47538981 |  |
| 1562029_at   | -                | -2,138804305 | -1,663414495 | -0,47538981 |  |
| 1565880_at   | -                | -2,138804305 | -1,663414495 | -0,47538981 |  |
| 1566242_at   | -                | -2,138804305 | -1,663414495 | -0,47538981 |  |
| 1566427_at   | -                | -2,138804305 | -1,663414495 | -0,47538981 |  |
| 1570249_x_at | -                | -2,138804305 | -1,663414495 | -0,47538981 |  |
| 206981_at    | SCN4A            | -2,138804305 | -1,663414495 | -0,47538981 |  |
| 211491_at    | ADRA1A           | -2,138804305 | -1,663414495 | -0,47538981 |  |
| 216452_at    | TRPM3            | -2,138804305 | -1,663414495 | -0,47538981 |  |
| 217607_x_at  | EIF4G2           | -2,138804305 | -1,663414495 | -0,47538981 |  |
| 222184_at    | -                | -2,138804305 | -1,663414495 | -0,47538981 |  |
| 222321_at    | AGTR2            | -2,138804305 | -1,663414495 | -0,47538981 |  |

|              |                   |              |              |             |  |
|--------------|-------------------|--------------|--------------|-------------|--|
| 233308_at    | COPB1             | -2,138804305 | -1,663414495 | -0,47538981 |  |
| 235422_at    | -                 | -2,138804305 | -1,663414495 | -0,47538981 |  |
| 240154_at    | -                 | -2,138804305 | -1,663414495 | -0,47538981 |  |
| 242540_at    | DNHD1             | -2,138804305 | -1,663414495 | -0,47538981 |  |
| 1556854_at   | LOC283501         | -0,299034815 | 0,176436073  | -0,47547089 |  |
| 1559977_a_at | SLC25A34          | -0,299034815 | 0,176436073  | -0,47547089 |  |
| 214033_at    | ABCC6             | -0,299034815 | 0,176436073  | -0,47547089 |  |
| 217377_x_at  | NTRK3             | -0,299034815 | 0,176436073  | -0,47547089 |  |
| 1559787_at   | -                 | -2,262747984 | -1,787089803 | -0,47565818 |  |
| 1565807_at   | -                 | -2,262747984 | -1,787089803 | -0,47565818 |  |
| 1569468_at   | ZNF876P           | -2,262747984 | -1,787089803 | -0,47565818 |  |
| 1570008_at   | GNN               | -2,262747984 | -1,787089803 | -0,47565818 |  |
| 204911_s_at  | TRIM3             | -2,262747984 | -1,787089803 | -0,47565818 |  |
| 208266_at    | C8orf17           | -2,262747984 | -1,787089803 | -0,47565818 |  |
| 215295_at    | DTNB              | -2,262747984 | -1,787089803 | -0,47565818 |  |
| 217065_at    | YME1L1            | -2,262747984 | -1,787089803 | -0,47565818 |  |
| 229042_s_at  | DYNC1H1           | -2,262747984 | -1,787089803 | -0,47565818 |  |
| 234940_s_at  | -                 | -2,262747984 | -1,787089803 | -0,47565818 |  |
| 235439_at    | RBMS2             | -2,262747984 | -1,787089803 | -0,47565818 |  |
| 235963_at    | -                 | -2,262747984 | -1,787089803 | -0,47565818 |  |
| 239399_at    | -                 | -2,262747984 | -1,787089803 | -0,47565818 |  |
| 239529_at    | C5orf20 /// TIFAB | -2,262747984 | -1,787089803 | -0,47565818 |  |
| 240418_at    | -                 | -2,262747984 | -1,787089803 | -0,47565818 |  |
| 241683_at    | HECTD1            | -2,262747984 | -1,787089803 | -0,47565818 |  |
| 241895_at    | LOC440905         | -2,262747984 | -1,787089803 | -0,47565818 |  |
| 243415_at    | -                 | -2,262747984 | -1,787089803 | -0,47565818 |  |
| 203929_s_at  | MAPT              | -0,759588698 | -0,283667828 | -0,47592087 |  |
| 204280_at    | RGS14             | -0,759588698 | -0,283667828 | -0,47592087 |  |
| 237098_at    | C1orf21           | -0,759588698 | -0,283667828 | -0,47592087 |  |
| 240052_at    | ITPR1             | -0,759588698 | -0,283667828 | -0,47592087 |  |
| 244205_at    | ALAS2             | -0,759588698 | -0,283667828 | -0,47592087 |  |
| 205471_s_at  | DACH1             | -0,366776884 | 0,109221392  | -0,47599828 |  |
| 231462_at    | TMEM114           | -0,366776884 | 0,109221392  | -0,47599828 |  |
| 232602_at    | WFDC3             | -0,366776884 | 0,109221392  | -0,47599828 |  |
| 227674_at    | ZNF585A           | 3,059434754  | 3,535445117  | -0,47601036 |  |
| 1557998_at   | NAALADL2          | -3,212234735 | -2,735862426 | -0,47637231 |  |
| 1560781_at   | DNHD1             | -3,212234735 | -2,735862426 | -0,47637231 |  |
| 1562864_at   | -                 | -3,212234735 | -2,735862426 | -0,47637231 |  |
| 235885_at    | P2RY12            | -3,212234735 | -2,735862426 | -0,47637231 |  |
| 236739_at    | LOC150622         | -3,212234735 | -2,735862426 | -0,47637231 |  |
| 204275_at    | LOC100507047 /    | 0,228146222  | 0,704715219  | -0,476569   |  |
| 210882_s_at  | TRO               | 0,228146222  | 0,704715219  | -0,476569   |  |
| 236097_at    | -                 | 0,228146222  | 0,704715219  | -0,476569   |  |
| 202448_s_at  | ZER1              | -0,67289328  | -0,19610998  | -0,4767833  |  |
| 217611_at    | ERICH1            | -0,67289328  | -0,19610998  | -0,4767833  |  |
| 220006_at    | CCDC48            | -0,67289328  | -0,19610998  | -0,4767833  |  |
| 242226_at    | LOC100288079      | -0,67289328  | -0,19610998  | -0,4767833  |  |
| 1560552_a_at | -                 | -3,32387526  | -2,847001814 | -0,47687345 |  |
| 211142_x_at  | HLA-DOA           | 0,181384709  | 0,658444279  | -0,47705957 |  |
| 1553572_a_at | CYGB              | 1,011212064  | 1,488344553  | -0,47713249 |  |
| 1556014_at   | MESP2             | 0,291166226  | 0,768343791  | -0,47717756 |  |
| 232646_at    | TTC17             | 0,291166226  | 0,768343791  | -0,47717756 |  |
| 221991_at    | NXPH3             | 0,57782909   | 1,055274826  | -0,47744574 |  |
| 244450_at    | -                 | 1,67631007   | 2,154405725  | -0,47809565 |  |
| 1553411_s_at | SALL3             | -1,591296941 | -1,112851844 | -0,4784451  |  |
| 1556451_at   | -                 | -1,591296941 | -1,112851844 | -0,4784451  |  |



|              |                 |              |              |             |  |
|--------------|-----------------|--------------|--------------|-------------|--|
| 1560910_at   | PPIL6           | -1,591296941 | -1,112851844 | -0,4784451  |  |
| 1560974_s_at | NOS1            | -1,591296941 | -1,112851844 | -0,4784451  |  |
| 1568974_at   | NHEG1           | -1,591296941 | -1,112851844 | -0,4784451  |  |
| 202191_s_at  | GAS7            | -1,591296941 | -1,112851844 | -0,4784451  |  |
| 226999_at    | RNPC3           | -1,591296941 | -1,112851844 | -0,4784451  |  |
| 232501_at    | -               | -1,591296941 | -1,112851844 | -0,4784451  |  |
| 233175_at    | ZNF460          | -1,591296941 | -1,112851844 | -0,4784451  |  |
| 233533_at    | KRTAP1-5        | -1,591296941 | -1,112851844 | -0,4784451  |  |
| 236872_at    | RBM22           | -1,591296941 | -1,112851844 | -0,4784451  |  |
| 239453_at    | -               | -1,591296941 | -1,112851844 | -0,4784451  |  |
| 241573_at    | LOC100505735    | -1,591296941 | -1,112851844 | -0,4784451  |  |
| 244341_at    | -               | 1,46610492   | 1,944570415  | -0,47846549 |  |
| 208760_at    | UBE2I           | 1,129248302  | 1,60795124   | -0,47870294 |  |
| 1564281_at   | LINC00491       | 1,326951551  | 1,805902329  | -0,47895078 |  |
| 224696_s_at  | DCAF5           | 0,911589958  | 1,390636111  | -0,47904615 |  |
| 1552281_at   | SLC39A5         | 0,767063567  | 1,246149888  | -0,47908632 |  |
| 207351_s_at  | SH2D2A          | 0,767063567  | 1,246149888  | -0,47908632 |  |
| 1553147_at   | RANBP3L         | -3,054236653 | -2,575129729 | -0,47910692 |  |
| 220897_at    | -               | -3,054236653 | -2,575129729 | -0,47910692 |  |
| 241052_at    | -               | -3,054236653 | -2,575129729 | -0,47910692 |  |
| 202588_at    | AK1             | -0,022466681 | 0,456918297  | -0,47938498 |  |
| 217113_at    | AMACR           | -0,022466681 | 0,456918297  | -0,47938498 |  |
| 230682_x_at  | ABCC3           | 0,384950573  | 0,864649967  | -0,47969939 |  |
| 241155_at    | -               | 0,384950573  | 0,864649967  | -0,47969939 |  |
| 1553437_at   | KLHDC7A         | -1,812418401 | -1,332017329 | -0,48040107 |  |
| 1555053_at   | SYT9            | -1,812418401 | -1,332017329 | -0,48040107 |  |
| 1558769_s_at | DNAH1           | -1,812418401 | -1,332017329 | -0,48040107 |  |
| 1563235_at   | -               | -1,812418401 | -1,332017329 | -0,48040107 |  |
| 205175_s_at  | KHK             | -1,812418401 | -1,332017329 | -0,48040107 |  |
| 209617_s_at  | CTNND2          | -1,812418401 | -1,332017329 | -0,48040107 |  |
| 234383_x_at  | -               | -1,812418401 | -1,332017329 | -0,48040107 |  |
| 234559_at    | -               | -1,812418401 | -1,332017329 | -0,48040107 |  |
| 239233_at    | CCDC88A         | -1,812418401 | -1,332017329 | -0,48040107 |  |
| 242419_at    | -               | -1,812418401 | -1,332017329 | -0,48040107 |  |
| 229101_at    | IL17RA          | 0,123193849  | 0,603679647  | -0,4804858  |  |
| 232459_at    | -               | 0,123193849  | 0,603679647  | -0,4804858  |  |
| 221260_s_at  | CSRNP2          | 0,792179257  | 1,272721751  | -0,48054249 |  |
| 1562715_at   | -               | -2,64318869  | -2,162639771 | -0,48054892 |  |
| 1569731_at   | -               | -2,64318869  | -2,162639771 | -0,48054892 |  |
| 206983_at    | CCR6            | -2,64318869  | -2,162639771 | -0,48054892 |  |
| 214247_s_at  | DKK3            | -2,64318869  | -2,162639771 | -0,48054892 |  |
| 216073_at    | ANKRD34C        | -2,64318869  | -2,162639771 | -0,48054892 |  |
| 223866_at    | ARMC2           | -2,64318869  | -2,162639771 | -0,48054892 |  |
| 224350_at    | -               | -2,64318869  | -2,162639771 | -0,48054892 |  |
| 231633_at    | -               | -2,64318869  | -2,162639771 | -0,48054892 |  |
| 235700_at    | CT45A1 /// CT45 | -2,64318869  | -2,162639771 | -0,48054892 |  |
| 239146_at    | CLDND1          | -2,64318869  | -2,162639771 | -0,48054892 |  |
| 244697_at    | -               | -0,00073712  | 0,479907041  | -0,48064416 |  |
| 230332_at    | ZCCHC7          | 1,504602299  | 1,98530622   | -0,48070392 |  |
| 215427_s_at  | ZCCHC14         | -1,047650486 | -0,566887459 | -0,48076303 |  |
| 223828_s_at  | LGALS12         | -1,047650486 | -0,566887459 | -0,48076303 |  |
| 229385_s_at  | PLAC2           | -1,047650486 | -0,566887459 | -0,48076303 |  |
| 232284_at    | PSMD6-AS2       | -1,047650486 | -0,566887459 | -0,48076303 |  |
| 237239_at    | -               | -1,047650486 | -0,566887459 | -0,48076303 |  |
| 227074_at    | LOC100131564    | 1,666156729  | 2,147243253  | -0,48108652 |  |
| 1556806_at   | -               | 0,072842263  | 0,553993624  | -0,48115136 |  |

|              |                 |              |              |             |  |
|--------------|-----------------|--------------|--------------|-------------|--|
| 214004_s_at  | VGLL4           | 0,072842263  | 0,553993624  | -0,48115136 |  |
| 215032_at    | RREB1           | 0,255492549  | 0,73688026   | -0,48138771 |  |
| 210345_s_at  | DNAH9           | -0,352951799 | 0,128747141  | -0,48169894 |  |
| 240340_at    | SPATA3          | -0,352951799 | 0,128747141  | -0,48169894 |  |
| 228541_x_at  | -               | 1,596577845  | 2,078620836  | -0,48204299 |  |
| 225826_at    | MMAB            | 1,434549838  | 1,916759838  | -0,48221    |  |
| 1558168_at   | -               | -0,83191556  | -0,34958478  | -0,48233078 |  |
| 208202_s_at  | PHF15           | -0,83191556  | -0,34958478  | -0,48233078 |  |
| 216692_at    | -               | -0,83191556  | -0,34958478  | -0,48233078 |  |
| 217184_s_at  | LTK             | -0,83191556  | -0,34958478  | -0,48233078 |  |
| 220669_at    | OTUD4           | -0,83191556  | -0,34958478  | -0,48233078 |  |
| 222370_x_at  | -               | -0,83191556  | -0,34958478  | -0,48233078 |  |
| 233324_at    | TRERF1          | -0,83191556  | -0,34958478  | -0,48233078 |  |
| 1552804_a_at | TIRAP           | -0,259832361 | 0,222599095  | -0,48243146 |  |
| 1568248_x_at | SNORA71B        | -0,423248115 | 0,059218869  | -0,48246698 |  |
| 231143_at    | LOC100507421    | -0,423248115 | 0,059218869  | -0,48246698 |  |
| 1552656_s_at | UHMK1           | 0,334552598  | 0,817300337  | -0,48274774 |  |
| 1557616_at   | ZNF496          | 0,334552598  | 0,817300337  | -0,48274774 |  |
| 1559391_s_at | -               | 0,334552598  | 0,817300337  | -0,48274774 |  |
| 1569834_at   | -               | 0,334552598  | 0,817300337  | -0,48274774 |  |
| 202053_s_at  | ALDH3A2         | 1,946200473  | 2,428994491  | -0,48279402 |  |
| 219559_at    | SLC17A9         | 1,699726954  | 2,182705233  | -0,48297828 |  |
| 1554175_at   | CD300LB         | -0,172274514 | 0,310717132  | -0,48299165 |  |
| 227427_at    | ARHGEF25        | 1,114389003  | 1,59747851   | -0,48308951 |  |
| 1554566_at   | KCTD17          | -0,325749314 | 0,157549243  | -0,48329856 |  |
| 1554659_at   | NEK4            | -0,325749314 | 0,157549243  | -0,48329856 |  |
| 224062_x_at  | KLK4            | -0,325749314 | 0,157549243  | -0,48329856 |  |
| 1558849_at   | LOC284276       | -0,741668563 | -0,258114234 | -0,48355433 |  |
| 1568719_s_at | SLC22A23        | -0,741668563 | -0,258114234 | -0,48355433 |  |
| 216953_s_at  | WT1             | 0,503742507  | 0,987376598  | -0,48363409 |  |
| 202971_s_at  | DYRK2           | 0,351548291  | 0,835239052  | -0,48369076 |  |
| 205676_at    | CYP27B1         | 0,351548291  | 0,835239052  | -0,48369076 |  |
| 235847_at    | -               | 1,735773781  | 2,21959457   | -0,48382079 |  |
| 1561206_at   | KLHL8           | -0,234278768 | 0,249604176  | -0,48388294 |  |
| 213422_s_at  | MXRA8           | -0,234278768 | 0,249604176  | -0,48388294 |  |
| 214748_at    | N4BP2L2         | 0,555999837  | 1,039887232  | -0,48388739 |  |
| 201158_at    | NMT1            | 1,823660386  | 2,307890888  | -0,4842305  |  |
| 1560853_x_at | ZNF826P         | -1,131062212 | -0,646746079 | -0,48431613 |  |
| 207490_at    | TUBA4B          | -1,131062212 | -0,646746079 | -0,48431613 |  |
| 228288_at    | RPAIN           | -1,131062212 | -0,646746079 | -0,48431613 |  |
| 229740_at    | C17orf109       | -1,131062212 | -0,646746079 | -0,48431613 |  |
| 232069_at    | KIF26A          | -1,131062212 | -0,646746079 | -0,48431613 |  |
| 239077_at    | CSGALNACT2      | -1,131062212 | -0,646746079 | -0,48431613 |  |
| 241522_at    | -               | -1,131062212 | -0,646746079 | -0,48431613 |  |
| 1565639_a_at | -               | -0,148196756 | 0,336136178  | -0,48433293 |  |
| 229078_s_at  | KIAA1704        | -0,148196756 | 0,336136178  | -0,48433293 |  |
| 209034_at    | PNRC1           | 2,109966786  | 2,594367918  | -0,48440113 |  |
| 1552793_at   | C8orf31         | -1,639579028 | -1,154897679 | -0,48468135 |  |
| 1555944_at   | FAM120A         | -1,639579028 | -1,154897679 | -0,48468135 |  |
| 1558176_at   | CYAT1 /// IGLC1 | -1,639579028 | -1,154897679 | -0,48468135 |  |
| 1564168_a_at | LOC93444        | -1,639579028 | -1,154897679 | -0,48468135 |  |
| 203144_s_at  | KIAA0040        | -1,639579028 | -1,154897679 | -0,48468135 |  |
| 220729_at    | -               | -1,639579028 | -1,154897679 | -0,48468135 |  |
| 221259_s_at  | TEX11           | -1,639579028 | -1,154897679 | -0,48468135 |  |
| 221465_at    | OR6A2           | -1,639579028 | -1,154897679 | -0,48468135 |  |
| 236908_at    | -               | -1,639579028 | -1,154897679 | -0,48468135 |  |

|              |              |              |              |             |  |
|--------------|--------------|--------------|--------------|-------------|--|
| 239119_at    | -            | -1,639579028 | -1,154897679 | -0,48468135 |  |
| 241576_at    | -            | -1,639579028 | -1,154897679 | -0,48468135 |  |
| 1557522_x_at | -            | 1,917954284  | 2,403170156  | -0,48521587 |  |
| 1559452_a_at | -            | -0,946847173 | -0,461594427 | -0,48525275 |  |
| 205708_s_at  | TRPM2        | -0,946847173 | -0,461594427 | -0,48525275 |  |
| 219695_at    | SMPD3        | -0,946847173 | -0,461594427 | -0,48525275 |  |
| 229722_at    | LOC100270804 | -0,946847173 | -0,461594427 | -0,48525275 |  |
| 235590_at    | FAM178A      | -0,946847173 | -0,461594427 | -0,48525275 |  |
| 209926_at    | MEF2BNB      | 0,083054335  | 0,568365095  | -0,48531076 |  |
| 221512_at    | TMEM222      | 1,805273023  | 2,290658654  | -0,48538563 |  |
| 241425_at    | NUPL1        | 0,95671774   | 1,442269454  | -0,48555171 |  |
| 232138_at    | MBNL2        | 1,40228911   | 1,888402606  | -0,4861135  |  |
| 216107_at    | PP13         | -0,622910612 | -0,136643983 | -0,48626663 |  |
| 217270_s_at  | DYRK1B       | -0,622910612 | -0,136643983 | -0,48626663 |  |
| 202510_s_at  | TNFAIP2      | -0,706943342 | -0,220592223 | -0,48635112 |  |
| 214381_at    | LOC441601    | -0,706943342 | -0,220592223 | -0,48635112 |  |
| 223634_at    | RASD2        | -0,706943342 | -0,220592223 | -0,48635112 |  |
| 239926_at    | -            | -0,706943342 | -0,220592223 | -0,48635112 |  |
| 1565681_s_at | DIP2C        | 0,171847695  | 0,658444279  | -0,48659658 |  |
| 1552925_at   | PCDH10       | 0,82905153   | 1,315948728  | -0,4868972  |  |
| 241347_at    | RNF213       | 0,359971644  | 0,847075464  | -0,48710382 |  |
| 1552607_at   | FAM223A      | -1,399512875 | -0,912331589 | -0,48718129 |  |
| 1558553_at   | -            | -1,399512875 | -0,912331589 | -0,48718129 |  |
| 204787_at    | VSIG4        | -1,399512875 | -0,912331589 | -0,48718129 |  |
| 211583_x_at  | NCR3         | -1,399512875 | -0,912331589 | -0,48718129 |  |
| 216546_s_at  | CHI3L1       | -1,399512875 | -0,912331589 | -0,48718129 |  |
| 226804_at    | FAM20A       | -1,399512875 | -0,912331589 | -0,48718129 |  |
| 231651_at    | C17orf57     | -1,399512875 | -0,912331589 | -0,48718129 |  |
| 234384_at    | -            | -1,399512875 | -0,912331589 | -0,48718129 |  |
| 235922_at    | -            | -1,399512875 | -0,912331589 | -0,48718129 |  |
| 236112_at    | LOC285548    | -1,399512875 | -0,912331589 | -0,48718129 |  |
| 240835_at    | -            | -1,399512875 | -0,912331589 | -0,48718129 |  |
| 244298_at    | -            | -1,399512875 | -0,912331589 | -0,48718129 |  |
| 215411_s_at  | TRAF3IP2     | 0,57782909   | 1,065442793  | -0,4876137  |  |
| 225240_s_at  | MSI2         | -0,512251684 | -0,024572586 | -0,4876791  |  |
| 241276_at    | -            | -0,512251684 | -0,024572586 | -0,4876791  |  |
| 219099_at    | C12orf5      | 0,317354302  | 0,805216064  | -0,48786176 |  |
| 1561291_at   | -            | -2,823166348 | -2,335104118 | -0,48806223 |  |
| 221583_s_at  | KCNMA1       | -2,823166348 | -2,335104118 | -0,48806223 |  |
| 233419_at    | -            | -2,823166348 | -2,335104118 | -0,48806223 |  |
| 233791_at    | -            | -2,823166348 | -2,335104118 | -0,48806223 |  |
| 237217_at    | ADAMTSL1     | -2,823166348 | -2,335104118 | -0,48806223 |  |
| 237910_x_at  | FAM92A1      | -2,823166348 | -2,335104118 | -0,48806223 |  |
| 240858_at    | -            | -2,823166348 | -2,335104118 | -0,48806223 |  |
| 241319_at    | -            | -2,823166348 | -2,335104118 | -0,48806223 |  |
| 242067_at    | -            | -2,823166348 | -2,335104118 | -0,48806223 |  |
| 205333_s_at  | RCE1         | 0,592200562  | 1,080561626  | -0,48836106 |  |
| 227436_at    | OTUD7B       | 1,011212064  | 1,499637023  | -0,48842496 |  |
| 1555677_s_at | SMC1A        | -0,59053611  | -0,102100538 | -0,48843557 |  |
| 209924_at    | CCL18        | -0,59053611  | -0,102100538 | -0,48843557 |  |
| 224291_at    | CACNG6       | -0,59053611  | -0,102100538 | -0,48843557 |  |
| 233966_at    | -            | -0,59053611  | -0,102100538 | -0,48843557 |  |
| 244633_at    | -            | -0,59053611  | -0,102100538 | -0,48843557 |  |
| 1559508_at   | -            | -1,308181863 | -0,819238336 | -0,48894353 |  |
| 1564984_at   | -            | -1,308181863 | -0,819238336 | -0,48894353 |  |
| 209738_x_at  | PSG6         | -1,308181863 | -0,819238336 | -0,48894353 |  |

|              |              |              |              |             |  |
|--------------|--------------|--------------|--------------|-------------|--|
| 214084_x_at  | NCF1C        | -1,308181863 | -0,819238336 | -0,48894353 |  |
| 214489_at    | FSHB         | -1,308181863 | -0,819238336 | -0,48894353 |  |
| 229179_at    | RUFY1        | -1,308181863 | -0,819238336 | -0,48894353 |  |
| 230445_at    | BTBD17       | -1,308181863 | -0,819238336 | -0,48894353 |  |
| 233278_at    | -            | -1,308181863 | -0,819238336 | -0,48894353 |  |
| 1560434_x_at | CLTA         | -0,136301282 | 0,352836757  | -0,48913804 |  |
| 215604_x_at  | -            | 1,973904239  | 2,464004877  | -0,49010064 |  |
| 1559533_at   | -            | -0,285837228 | 0,204310755  | -0,49014798 |  |
| 233446_at    | ONECUT2      | -0,196756757 | 0,293518836  | -0,49027559 |  |
| 244822_at    | GART         | -0,196756757 | 0,293518836  | -0,49027559 |  |
| 211866_x_at  | HFE          | -0,112808516 | 0,377530647  | -0,49033916 |  |
| 220457_at    | SAMD4B       | -0,112808516 | 0,377530647  | -0,49033916 |  |
| 221301_at    | VWA7         | -0,112808516 | 0,377530647  | -0,49033916 |  |
| 1553778_at   | WBSR27       | -0,033456564 | 0,456918297  | -0,49037486 |  |
| 231135_at    | LOC151174    | -0,033456564 | 0,456918297  | -0,49037486 |  |
| 1552649_a_at | RAD51L3-RFFL | -1,026571149 | -0,536087151 | -0,490484   |  |
| 1555268_a_at | GRID1        | -1,026571149 | -0,536087151 | -0,490484   |  |
| 1563505_at   | DUSP16       | -1,026571149 | -0,536087151 | -0,490484   |  |
| 1569536_at   | FLVCR2       | -1,026571149 | -0,536087151 | -0,490484   |  |
| 231133_at    | CCDC164      | -1,026571149 | -0,536087151 | -0,490484   |  |
| 236595_at    | LOC100507307 | -1,026571149 | -0,536087151 | -0,490484   |  |
| 239428_at    | -            | -1,026571149 | -0,536087151 | -0,490484   |  |
| 227798_at    | SMAD1        | 1,027166904  | 1,518263577  | -0,49109667 |  |
| 226677_at    | ZNF521       | 0,496120222  | 0,987376598  | -0,49125638 |  |
| 233944_at    | -            | 0,44160593   | 0,932882274  | -0,49127634 |  |
| 244071_at    | FBLL1        | 0,44160593   | 0,932882274  | -0,49127634 |  |
| 229395_at    | STX4         | 0,67554678   | 1,16809119   | -0,49254441 |  |
| 1552321_a_at | CCDC65       | -2,779459409 | -2,286583451 | -0,49287596 |  |
| 1557301_a_at | -            | -2,779459409 | -2,286583451 | -0,49287596 |  |
| 1561738_at   | -            | -2,779459409 | -2,286583451 | -0,49287596 |  |
| 1564878_at   | -            | -2,779459409 | -2,286583451 | -0,49287596 |  |
| 1566787_at   | -            | -2,779459409 | -2,286583451 | -0,49287596 |  |
| 205342_s_at  | SULT1C2      | -2,779459409 | -2,286583451 | -0,49287596 |  |
| 226147_s_at  | PIGR         | -2,779459409 | -2,286583451 | -0,49287596 |  |
| 228083_at    | CACNA2D4     | -2,779459409 | -2,286583451 | -0,49287596 |  |
| 231804_at    | RXFP1        | -2,779459409 | -2,286583451 | -0,49287596 |  |
| 235336_at    | -            | -2,779459409 | -2,286583451 | -0,49287596 |  |
| 207817_at    | IFNW1        | -1,543331864 | -1,050406615 | -0,49292525 |  |
| 208063_s_at  | CAPN9        | -1,543331864 | -1,050406615 | -0,49292525 |  |
| 219768_at    | VTCN1        | -1,543331864 | -1,050406615 | -0,49292525 |  |
| 235312_s_at  | NRAP         | -1,543331864 | -1,050406615 | -0,49292525 |  |
| 236058_at    | C1orf172     | -1,543331864 | -1,050406615 | -0,49292525 |  |
| 240543_at    | -            | -1,543331864 | -1,050406615 | -0,49292525 |  |
| 243112_at    | -            | -1,543331864 | -1,050406615 | -0,49292525 |  |
| 235039_x_at  | LIN9         | 0,779676066  | 1,272721751  | -0,49304569 |  |
| 212609_s_at  | AKT3         | 0,995078803  | 1,488344553  | -0,49326575 |  |
| 1556651_at   | -            | -3,114791413 | -2,621331989 | -0,49345942 |  |
| 1560918_at   | -            | -3,114791413 | -2,621331989 | -0,49345942 |  |
| 1562111_at   | -            | -3,114791413 | -2,621331989 | -0,49345942 |  |
| 210146_x_at  | LILRB2       | -3,114791413 | -2,621331989 | -0,49345942 |  |
| 217400_at    | -            | -3,114791413 | -2,621331989 | -0,49345942 |  |
| 231665_at    | ARG1         | -3,114791413 | -2,621331989 | -0,49345942 |  |
| 228040_at    | MGC21881     | 1,442503549  | 1,936283387  | -0,49377984 |  |
| 241209_at    | DCAF6        | -3,448416261 | -2,954576755 | -0,49383951 |  |
| 224681_at    | GNA12        | 2,945117939  | 3,439026336  | -0,4939084  |  |
| 1554036_at   | ZBTB24       | -1,173767127 | -0,679763839 | -0,49400329 |  |

|              |                  |              |              |             |  |
|--------------|------------------|--------------|--------------|-------------|--|
| 1559376_at   | ATP1A1OS         | -1,173767127 | -0,679763839 | -0,49400329 |  |
| 1565730_at   | -                | -1,173767127 | -0,679763839 | -0,49400329 |  |
| 205738_s_at  | FABP3            | -1,173767127 | -0,679763839 | -0,49400329 |  |
| 213488_at    | SNED1            | -1,173767127 | -0,679763839 | -0,49400329 |  |
| 236023_at    | CDK9             | -1,173767127 | -0,679763839 | -0,49400329 |  |
| 236979_at    | BCL2L15          | -1,173767127 | -0,679763839 | -0,49400329 |  |
| 237478_at    | FTH1             | -1,173767127 | -0,679763839 | -0,49400329 |  |
| 238777_x_at  | ATMIN            | -1,173767127 | -0,679763839 | -0,49400329 |  |
| 243880_at    | GOSR2            | -1,173767127 | -0,679763839 | -0,49400329 |  |
| 1554847_at   | ATP6V1B1         | -1,71423189  | -1,220210588 | -0,4940213  |  |
| 1555685_at   | H6PD             | -1,71423189  | -1,220210588 | -0,4940213  |  |
| 1557963_at   | CDC42BPB         | -1,71423189  | -1,220210588 | -0,4940213  |  |
| 1563086_at   | -                | -1,71423189  | -1,220210588 | -0,4940213  |  |
| 1565936_a_at | LMO3             | -1,71423189  | -1,220210588 | -0,4940213  |  |
| 215056_at    | -                | -1,71423189  | -1,220210588 | -0,4940213  |  |
| 229340_at    | NKAPL            | -1,71423189  | -1,220210588 | -0,4940213  |  |
| 231477_at    | -                | -1,71423189  | -1,220210588 | -0,4940213  |  |
| 233447_at    | PSMG4            | -1,71423189  | -1,220210588 | -0,4940213  |  |
| 240074_at    | -                | -1,71423189  | -1,220210588 | -0,4940213  |  |
| 240380_at    | LOC728040        | -1,71423189  | -1,220210588 | -0,4940213  |  |
| 241071_at    | -                | -1,71423189  | -1,220210588 | -0,4940213  |  |
| 203021_at    | SLPI             | -0,57445847  | -0,079522948 | -0,49493552 |  |
| 214148_at    | ITFG2 /// LOC100 | -0,57445847  | -0,079522948 | -0,49493552 |  |
| 214883_at    | THRA             | -0,57445847  | -0,079522948 | -0,49493552 |  |
| 220641_at    | NOX5             | -0,57445847  | -0,079522948 | -0,49493552 |  |
| 220971_at    | IL25             | -0,57445847  | -0,079522948 | -0,49493552 |  |
| 223693_s_at  | RADIL            | -0,57445847  | -0,079522948 | -0,49493552 |  |
| 231657_s_at  | CCDC74B          | -0,57445847  | -0,079522948 | -0,49493552 |  |
| 213879_at    | -                | 2,979690938  | 3,474751011  | -0,49506007 |  |
| 1558750_a_at | LOC100288637     | 0,728550685  | 1,223626587  | -0,4950759  |  |
| 208486_at    | DRD5             | -0,986356909 | -0,490927335 | -0,49542957 |  |
| 209977_at    | PLG              | -0,986356909 | -0,490927335 | -0,49542957 |  |
| 214893_x_at  | HCN2             | -0,986356909 | -0,490927335 | -0,49542957 |  |
| 222864_s_at  | ZNF219           | -0,986356909 | -0,490927335 | -0,49542957 |  |
| 228068_at    | GOLGA7B          | -0,986356909 | -0,490927335 | -0,49542957 |  |
| 229631_at    | DNHD1            | -0,986356909 | -0,490927335 | -0,49542957 |  |
| 233745_at    | PTOV1-AS1        | -0,986356909 | -0,490927335 | -0,49542957 |  |
| 243508_at    | C20orf196        | -0,986356909 | -0,490927335 | -0,49542957 |  |
| 244624_at    | RPS27A           | -0,986356909 | -0,490927335 | -0,49542957 |  |
| 206798_x_at  | DLEC1            | -0,467091869 | 0,028364014  | -0,49545588 |  |
| 219367_s_at  | -                | -0,467091869 | 0,028364014  | -0,49545588 |  |
| 227885_at    | LOC400236        | -0,467091869 | 0,028364014  | -0,49545588 |  |
| 240147_at    | C7orf50          | -0,467091869 | 0,028364014  | -0,49545588 |  |
| 231716_at    | RC3H2            | 1,923647937  | 2,419116683  | -0,49546875 |  |
| 1564580_at   | -                | -3,342483913 | -2,847001814 | -0,4954821  |  |
| 213002_at    | MARCKS           | 0,072842263  | 0,568365095  | -0,49552283 |  |
| 222012_at    | DCAF15           | 0,072842263  | 0,568365095  | -0,49552283 |  |
| 1553658_at   | LOC150197        | -0,366776884 | 0,128747141  | -0,49552402 |  |
| 212427_at    | KIAA0368         | -0,366776884 | 0,128747141  | -0,49552402 |  |
| 220453_at    | PQLC2            | -0,366776884 | 0,128747141  | -0,49552402 |  |
| 231194_at    | SNX32            | -0,366776884 | 0,128747141  | -0,49552402 |  |
| 238854_at    | LOC100506668     | -0,366776884 | 0,128747141  | -0,49552402 |  |
| 235867_at    | GSTM3            | 0,351548291  | 0,847075464  | -0,49552717 |  |
| 243030_at    | -                | -0,00073712  | 0,495031851  | -0,49576897 |  |
| 1568558_x_at | -                | -0,655928373 | -0,160136748 | -0,49579162 |  |
| 219587_at    | TTC12            | -0,655928373 | -0,160136748 | -0,49579162 |  |

|             |                   |              |              |             |  |
|-------------|-------------------|--------------|--------------|-------------|--|
| 229392_s_at | PIK3R2            | -0,655928373 | -0,160136748 | -0,49579162 |  |
| 229642_at   | ARHGEF7           | 0,228146222  | 0,724100169  | -0,49595395 |  |
| 202943_s_at | NAGA              | 1,129248302  | 1,6252386    | -0,4959903  |  |
| 242485_at   | -                 | 0,30867765   | 0,805216064  | -0,49653841 |  |
| 214072_x_at | NENF              | -0,543051993 | -0,046302147 | -0,49674985 |  |
| 221837_at   | KLHL22            | 0,020670649  | 0,51742585   | -0,4967552  |  |
| 230166_at   | KIAA1958          | 0,020670649  | 0,51742585   | -0,4967552  |  |
| 243261_at   | LOC154822         | 0,020670649  | 0,51742585   | -0,4967552  |  |
| 1552938_at  | ZIC5              | -2,359436556 | -1,862647763 | -0,49678879 |  |
| 1564559_at  | LOC728073         | -2,359436556 | -1,862647763 | -0,49678879 |  |
| 1570273_at  | -                 | -2,359436556 | -1,862647763 | -0,49678879 |  |
| 211421_s_at | RET               | -2,359436556 | -1,862647763 | -0,49678879 |  |
| 220582_at   | -                 | -2,359436556 | -1,862647763 | -0,49678879 |  |
| 224137_at   | CACNG7            | -2,359436556 | -1,862647763 | -0,49678879 |  |
| 232711_at   | -                 | -2,359436556 | -1,862647763 | -0,49678879 |  |
| 233886_at   | -                 | -2,359436556 | -1,862647763 | -0,49678879 |  |
| 234118_at   | -                 | -2,359436556 | -1,862647763 | -0,49678879 |  |
| 240392_at   | -                 | -2,359436556 | -1,862647763 | -0,49678879 |  |
| 206237_s_at | NRG1              | -0,43775896  | 0,059218869  | -0,49697783 |  |
| 244458_at   | -                 | -0,43775896  | 0,059218869  | -0,49697783 |  |
| 225490_at   | ARID2             | 1,40228911   | 1,899812471  | -0,49752336 |  |
| 1555535_at  | BPIFB6            | -1,353583928 | -0,855751026 | -0,4978329  |  |
| 202242_at   | TSPAN7            | -1,353583928 | -0,855751026 | -0,4978329  |  |
| 204996_s_at | CDK5R1            | -1,353583928 | -0,855751026 | -0,4978329  |  |
| 207520_at   | TROVE2            | -1,353583928 | -0,855751026 | -0,4978329  |  |
| 211846_s_at | PVRL1             | -1,353583928 | -0,855751026 | -0,4978329  |  |
| 230087_at   | PRIMA1            | -1,353583928 | -0,855751026 | -0,4978329  |  |
| 232565_at   | -                 | -1,353583928 | -0,855751026 | -0,4978329  |  |
| 232624_at   | ABTB2             | -1,353583928 | -0,855751026 | -0,4978329  |  |
| 1566934_at  | TYRO3P            | -0,888496123 | -0,39061235  | -0,49788377 |  |
| 1569915_at  | -                 | -0,888496123 | -0,39061235  | -0,49788377 |  |
| 209423_s_at | PHF20             | -0,888496123 | -0,39061235  | -0,49788377 |  |
| 211304_x_at | KCNJ5             | -0,888496123 | -0,39061235  | -0,49788377 |  |
| 1553185_at  | RASEF             | 1,593009234  | 2,091116676  | -0,49810744 |  |
| 226195_at   | IFT43             | 1,177702228  | 1,675891488  | -0,49818926 |  |
| 233473_x_at | -                 | 1,027166904  | 1,525647381  | -0,49848048 |  |
| 239735_at   | -                 | 0,541261317  | 1,039887232  | -0,49862591 |  |
| 1553028_at  | GPR156            | -2,236765673 | -1,738067356 | -0,49869832 |  |
| 1556865_at  | -                 | -2,236765673 | -1,738067356 | -0,49869832 |  |
| 1560946_at  | -                 | -2,236765673 | -1,738067356 | -0,49869832 |  |
| 1561565_at  | -                 | -2,236765673 | -1,738067356 | -0,49869832 |  |
| 205111_s_at | PLCE1             | -2,236765673 | -1,738067356 | -0,49869832 |  |
| 205735_s_at | AFF3              | -2,236765673 | -1,738067356 | -0,49869832 |  |
| 207068_at   | ZFP37             | -2,236765673 | -1,738067356 | -0,49869832 |  |
| 211431_s_at | TYRO3             | -2,236765673 | -1,738067356 | -0,49869832 |  |
| 214970_s_at | ST6GAL1           | -2,236765673 | -1,738067356 | -0,49869832 |  |
| 217244_at   | -                 | -2,236765673 | -1,738067356 | -0,49869832 |  |
| 217382_at   | -                 | -2,236765673 | -1,738067356 | -0,49869832 |  |
| 220246_at   | CAMK1D            | -2,236765673 | -1,738067356 | -0,49869832 |  |
| 230131_x_at | ARSD              | -2,236765673 | -1,738067356 | -0,49869832 |  |
| 231313_at   | FLJ27354          | -2,236765673 | -1,738067356 | -0,49869832 |  |
| 237314_at   | ENKUR             | -2,236765673 | -1,738067356 | -0,49869832 |  |
| 238546_at   | SLC8A1            | -2,236765673 | -1,738067356 | -0,49869832 |  |
| 238939_at   | ADD1              | -2,236765673 | -1,738067356 | -0,49869832 |  |
| 241167_at   | ITIH4 /// MUSTN   | -2,236765673 | -1,738067356 | -0,49869832 |  |
| 221671_x_at | IGK@ /// IGKC /// | 0,760715727  | 1,259496994  | -0,49878127 |  |

|              |                |              |              |             |  |
|--------------|----------------|--------------|--------------|-------------|--|
| 230886_at    | -              | 0,859074518  | 1,3579181    | -0,49884358 |  |
| 205323_s_at  | MTF1           | 1,000476627  | 1,499637023  | -0,4991604  |  |
| 1555586_at   | FAM71B         | -1,763254337 | -1,264005341 | -0,499249   |  |
| 1565863_at   | -              | -1,763254337 | -1,264005341 | -0,499249   |  |
| 1569112_at   | SLC44A5        | -1,763254337 | -1,264005341 | -0,499249   |  |
| 208168_s_at  | CHIT1          | -1,763254337 | -1,264005341 | -0,499249   |  |
| 209602_s_at  | GATA3          | -1,763254337 | -1,264005341 | -0,499249   |  |
| 209982_s_at  | NRXN2          | -1,763254337 | -1,264005341 | -0,499249   |  |
| 213665_at    | SOX4           | -1,763254337 | -1,264005341 | -0,499249   |  |
| 230842_at    | -              | -1,763254337 | -1,264005341 | -0,499249   |  |
| 233058_at    | GP5M2          | -1,763254337 | -1,264005341 | -0,499249   |  |
| 237294_at    | RASSF4         | -1,763254337 | -1,264005341 | -0,499249   |  |
| 239945_at    | -              | -1,763254337 | -1,264005341 | -0,499249   |  |
| 221593_s_at  | RPL31          | 2,247975581  | 2,747463672  | -0,49948809 |  |
| 232515_at    | -              | 1,422536444  | 1,922365006  | -0,49982856 |  |
| 1566606_a_at | TEX9           | -3,07502285  | -2,575129729 | -0,49989312 |  |
| 224383_at    | RNF17          | -3,07502285  | -2,575129729 | -0,49989312 |  |
| 239467_at    | -              | -3,07502285  | -2,575129729 | -0,49989312 |  |
| 240331_at    | -              | -3,07502285  | -2,575129729 | -0,49989312 |  |
| 1559528_at   | LOC100129917   | -2,908843709 | -2,408705138 | -0,50013857 |  |
| 1562165_at   | -              | -2,908843709 | -2,408705138 | -0,50013857 |  |
| 1565881_at   | -              | -2,908843709 | -2,408705138 | -0,50013857 |  |
| 205673_s_at  | ASB9           | -2,908843709 | -2,408705138 | -0,50013857 |  |
| 228599_at    | MS4A1          | -2,908843709 | -2,408705138 | -0,50013857 |  |
| 231001_at    | FIBIN          | -2,908843709 | -2,408705138 | -0,50013857 |  |
| 231060_at    | -              | -2,908843709 | -2,408705138 | -0,50013857 |  |
| 221261_x_at  | MAGED4 /// MAG | 3,042527069  | 3,542741726  | -0,50021466 |  |
| 1554252_a_at | CERS3          | -2,712026959 | -2,211750327 | -0,50027663 |  |
| 1558589_at   | C21orf15       | -2,712026959 | -2,211750327 | -0,50027663 |  |
| 1558795_at   | LOC728052      | -2,712026959 | -2,211750327 | -0,50027663 |  |
| 233285_at    | -              | -2,712026959 | -2,211750327 | -0,50027663 |  |
| 237001_at    | -              | -2,712026959 | -2,211750327 | -0,50027663 |  |
| 240427_at    | -              | -2,712026959 | -2,211750327 | -0,50027663 |  |
| 241753_at    | -              | -2,712026959 | -2,211750327 | -0,50027663 |  |
| 242559_at    | -              | -2,712026959 | -2,211750327 | -0,50027663 |  |
| 244629_s_at  | PDPK1          | -2,712026959 | -2,211750327 | -0,50027663 |  |
| 202889_x_at  | MAP7           | 0,255492549  | 0,755840599  | -0,50034805 |  |
| 238789_at    | KANK1          | 0,334552598  | 0,835239052  | -0,50068645 |  |
| 234414_at    | FAM22F         | 0,03125738   | 0,532164371  | -0,50090699 |  |
| 201915_at    | SEC63          | 1,089278259  | 1,590454215  | -0,50117596 |  |
| 211695_x_at  | MUC1           | -0,85085127  | -0,34958478  | -0,50126649 |  |
| 213820_s_at  | STARD5         | -0,85085127  | -0,34958478  | -0,50126649 |  |
| 218591_s_at  | NOL10          | -0,85085127  | -0,34958478  | -0,50126649 |  |
| 221390_s_at  | ASB12 /// MTMR | -0,85085127  | -0,34958478  | -0,50126649 |  |
| 230316_at    | SEC14L2        | -0,85085127  | -0,34958478  | -0,50126649 |  |
| 223162_s_at  | KIAA1147       | 1,850809354  | 2,352169913  | -0,50136056 |  |
| 1553940_a_at | LRRC28         | -0,759588698 | -0,258114234 | -0,50147446 |  |
| 1564251_at   | EMID1          | -0,759588698 | -0,258114234 | -0,50147446 |  |
| 213236_at    | SASH1          | -0,759588698 | -0,258114234 | -0,50147446 |  |
| 213575_at    | TRA2A          | -0,759588698 | -0,258114234 | -0,50147446 |  |
| 214510_at    | GPR20          | -0,759588698 | -0,258114234 | -0,50147446 |  |
| 235718_at    | SRL            | -0,759588698 | -0,258114234 | -0,50147446 |  |
| 207230_at    | CDON           | -0,234278768 | 0,26733076   | -0,50160953 |  |
| 208203_x_at  | KIR2DS5        | -0,234278768 | 0,26733076   | -0,50160953 |  |
| 243050_at    | -              | -0,234278768 | 0,26733076   | -0,50160953 |  |
| 1552912_a_at | IL23R          | -3,192553003 | -2,690860744 | -0,50169226 |  |

|              |                |              |              |             |  |
|--------------|----------------|--------------|--------------|-------------|--|
| 1563561_at   | -              | -3,192553003 | -2,690860744 | -0,50169226 |  |
| 230554_at    | ACSM2A         | -3,192553003 | -2,690860744 | -0,50169226 |  |
| 242616_at    | -              | -3,192553003 | -2,690860744 | -0,50169226 |  |
| 242856_at    | -              | 0,052199481  | 0,553993624  | -0,50179414 |  |
| 243543_at    | -              | 0,052199481  | 0,553993624  | -0,50179414 |  |
| 223166_x_at  | RABL6          | 0,67554678   | 1,177496821  | -0,50195004 |  |
| 230669_at    | RASA2          | -0,325749314 | 0,176436073  | -0,50218539 |  |
| 220750_s_at  | LEPRE1         | 2,436992838  | 2,939363796  | -0,50237096 |  |
| 1557630_s_at | -              | -0,423248115 | 0,079428135  | -0,50267625 |  |
| 1569234_at   | -              | -0,423248115 | 0,079428135  | -0,50267625 |  |
| 209506_s_at  | NR2F1          | -0,423248115 | 0,079428135  | -0,50267625 |  |
| 209561_at    | THBS3          | -0,299034815 | 0,204310755  | -0,50334557 |  |
| 217141_at    | BTBD7          | -0,299034815 | 0,204310755  | -0,50334557 |  |
| 1559205_s_at | -              | -0,394749123 | 0,109221392  | -0,50397052 |  |
| 204379_s_at  | FGFR3          | -0,394749123 | 0,109221392  | -0,50397052 |  |
| 240023_at    | -              | -0,394749123 | 0,109221392  | -0,50397052 |  |
| 1558705_at   | ATOH8          | 0,417596971  | 0,921731975  | -0,504135   |  |
| 232935_at    | -              | 0,417596971  | 0,921731975  | -0,504135   |  |
| 1553924_at   | FMO9P          | -2,667025278 | -2,162639771 | -0,50438551 |  |
| 1558436_a_at | -              | -2,667025278 | -2,162639771 | -0,50438551 |  |
| 1563392_at   | -              | -2,667025278 | -2,162639771 | -0,50438551 |  |
| 1564014_at   | -              | -2,667025278 | -2,162639771 | -0,50438551 |  |
| 211334_at    | MRE11A         | -2,667025278 | -2,162639771 | -0,50438551 |  |
| 231507_at    | -              | -2,667025278 | -2,162639771 | -0,50438551 |  |
| 234776_at    | DMBX1          | -2,667025278 | -2,162639771 | -0,50438551 |  |
| 237192_at    | -              | -2,667025278 | -2,162639771 | -0,50438551 |  |
| 237277_at    | -              | -2,667025278 | -2,162639771 | -0,50438551 |  |
| 240882_at    | LOC100506289   | -2,667025278 | -2,162639771 | -0,50438551 |  |
| 242134_at    | -              | -2,667025278 | -2,162639771 | -0,50438551 |  |
| 243073_at    | -              | -2,667025278 | -2,162639771 | -0,50438551 |  |
| 1569402_at   | MEIS3          | -0,496991414 | 0,007421914  | -0,50441333 |  |
| 227782_at    | ZBTB7C         | -0,496991414 | 0,007421914  | -0,50441333 |  |
| 236474_at    | -              | -0,496991414 | 0,007421914  | -0,50441333 |  |
| 243596_at    | -              | -0,496991414 | 0,007421914  | -0,50441333 |  |
| 244087_at    | -              | -0,496991414 | 0,007421914  | -0,50441333 |  |
| 219920_s_at  | AMIGO3 /// GMP | 0,945567441  | 1,450051551  | -0,50448411 |  |
| 216071_x_at  | MED12          | 1,799091453  | 2,303602088  | -0,50451063 |  |
| 213520_at    | RECQL4         | 2,089851283  | 2,594367918  | -0,50451663 |  |
| 1556049_at   | RTN4           | 0,95671774   | 1,461646549  | -0,50492881 |  |
| 218540_at    | THTPA          | 0,95671774   | 1,461646549  | -0,50492881 |  |
| 221510_s_at  | GLS            | 3,526916747  | 4,032509762  | -0,50559301 |  |
| 229418_at    | FAM222B        | 1,40228911   | 1,908311039  | -0,50602193 |  |
| 228538_at    | ZNF662         | 0,533835206  | 1,039887232  | -0,50605203 |  |
| 242533_at    | LOC100130051   | -0,112808516 | 0,393761504  | -0,50657002 |  |
| 1557218_s_at | FANCB          | 0,480753764  | 0,987376598  | -0,50662283 |  |
| 1555973_at   | -              | -1,838812296 | -1,332017329 | -0,50679497 |  |
| 1557339_at   | -              | -1,838812296 | -1,332017329 | -0,50679497 |  |
| 1559000_at   | C10orf108      | -1,838812296 | -1,332017329 | -0,50679497 |  |
| 205947_s_at  | VIPR2          | -1,838812296 | -1,332017329 | -0,50679497 |  |
| 208253_at    | SIGLEC8        | -1,838812296 | -1,332017329 | -0,50679497 |  |
| 215105_at    | CG030          | -1,838812296 | -1,332017329 | -0,50679497 |  |
| 220515_at    | DUSP21         | -1,838812296 | -1,332017329 | -0,50679497 |  |
| 221395_at    | TAS2R13        | -1,838812296 | -1,332017329 | -0,50679497 |  |
| 222961_at    | -              | -1,838812296 | -1,332017329 | -0,50679497 |  |
| 224073_at    | FLJ20464       | -1,838812296 | -1,332017329 | -0,50679497 |  |
| 231966_at    | PPP1R9A        | -1,838812296 | -1,332017329 | -0,50679497 |  |



|              |                  |              |              |             |  |
|--------------|------------------|--------------|--------------|-------------|--|
| 237145_at    | EIF2AK4          | -1,838812296 | -1,332017329 | -0,50679497 |  |
| 238080_at    | B4GALNT4         | -1,838812296 | -1,332017329 | -0,50679497 |  |
| 238503_at    | LOC100506354     | -1,838812296 | -1,332017329 | -0,50679497 |  |
| 243638_at    | -                | -1,838812296 | -1,332017329 | -0,50679497 |  |
| 244003_at    | -                | -1,838812296 | -1,332017329 | -0,50679497 |  |
| 244484_at    | -                | -1,838812296 | -1,332017329 | -0,50679497 |  |
| 244502_at    | -                | -1,838812296 | -1,332017329 | -0,50679497 |  |
| 212553_at    | RPRD2            | 2,314494121  | 2,821324225  | -0,5068301  |  |
| 212318_at    | TNPO3            | 3,75958912   | 4,266446205  | -0,50685708 |  |
| 1560330_at   | PCDH15           | -3,287237186 | -2,780313924 | -0,50692326 |  |
| 1560929_at   | -                | -3,287237186 | -2,780313924 | -0,50692326 |  |
| 1568784_at   | -                | -3,287237186 | -2,780313924 | -0,50692326 |  |
| 216151_at    | -                | -3,287237186 | -2,780313924 | -0,50692326 |  |
| 240586_at    | ENAM             | -3,287237186 | -2,780313924 | -0,50692326 |  |
| 241612_at    | FOXD3            | -3,287237186 | -2,780313924 | -0,50692326 |  |
| 229718_at    | N4BP2L1          | -0,089689931 | 0,417770464  | -0,50746039 |  |
| 219579_at    | RAB3IL1          | -0,196756757 | 0,310717132  | -0,50747389 |  |
| 234400_at    | -                | -0,196756757 | 0,310717132  | -0,50747389 |  |
| 204963_at    | SSPN             | -1,518072576 | -1,010192375 | -0,5078802  |  |
| 211667_x_at  | TRAV12-2         | -1,518072576 | -1,010192375 | -0,5078802  |  |
| 215979_s_at  | SLC7A1           | -1,518072576 | -1,010192375 | -0,5078802  |  |
| 234104_at    | -                | -1,518072576 | -1,010192375 | -0,5078802  |  |
| 234617_at    | OR52D1           | -1,518072576 | -1,010192375 | -0,5078802  |  |
| 237220_at    | -                | -1,518072576 | -1,010192375 | -0,5078802  |  |
| 237311_at    | -                | -1,518072576 | -1,010192375 | -0,5078802  |  |
| 237324_s_at  | HKDC1            | -1,518072576 | -1,010192375 | -0,5078802  |  |
| 241280_at    | ALDOB            | -1,518072576 | -1,010192375 | -0,5078802  |  |
| 49051_g_at   | DTX3             | -2,591268663 | -2,083276378 | -0,50799229 |  |
| 216267_s_at  | TMEM115          | 0,82905153   | 1,337086025  | -0,50803449 |  |
| 1563529_at   | HYDIN2           | -0,926850548 | -0,41858459  | -0,50826596 |  |
| 1564237_at   | -                | -0,926850548 | -0,41858459  | -0,50826596 |  |
| 1566643_a_at | -                | -0,926850548 | -0,41858459  | -0,50826596 |  |
| 207742_s_at  | NR6A1            | -0,926850548 | -0,41858459  | -0,50826596 |  |
| 209851_at    | ZC3H13           | -0,926850548 | -0,41858459  | -0,50826596 |  |
| 214088_s_at  | FUT3             | -0,926850548 | -0,41858459  | -0,50826596 |  |
| 214478_at    | SPP2             | -0,926850548 | -0,41858459  | -0,50826596 |  |
| 222357_at    | ZBTB20           | -0,926850548 | -0,41858459  | -0,50826596 |  |
| 227771_at    | LIFR             | -0,926850548 | -0,41858459  | -0,50826596 |  |
| 229736_at    | TMEM86B          | -0,926850548 | -0,41858459  | -0,50826596 |  |
| 233832_at    | -                | -0,926850548 | -0,41858459  | -0,50826596 |  |
| 1561335_at   | LOC440602        | -0,172274514 | 0,336136178  | -0,50841069 |  |
| 203193_at    | ESRRA            | 0,384950573  | 0,893473268  | -0,50852269 |  |
| 239731_at    | -                | 0,384950573  | 0,893473268  | -0,50852269 |  |
| 238558_at    | -                | 0,30867765   | 0,817300337  | -0,50862269 |  |
| 203954_x_at  | CLDN3            | -0,83191556  | -0,322870281 | -0,50904528 |  |
| 240499_at    | -                | -0,83191556  | -0,322870281 | -0,50904528 |  |
| 222540_s_at  | RSF1             | 1,973904239  | 2,483094137  | -0,5091899  |  |
| 1553923_at   | SLC22A24         | -1,240169874 | -0,730778808 | -0,50939107 |  |
| 1560171_at   | -                | -1,240169874 | -0,730778808 | -0,50939107 |  |
| 1569578_at   | -                | -1,240169874 | -0,730778808 | -0,50939107 |  |
| 207701_at    | C22orf24         | -1,240169874 | -0,730778808 | -0,50939107 |  |
| 209442_x_at  | ANK3             | -1,240169874 | -0,730778808 | -0,50939107 |  |
| 235499_at    | LOC728743        | -1,240169874 | -0,730778808 | -0,50939107 |  |
| 243620_at    | -                | -1,240169874 | -0,730778808 | -0,50939107 |  |
| 221044_s_at  | TRIM34 /// TRIM6 | 0,246434561  | 0,755840599  | -0,50940604 |  |
| 214302_x_at  | GJC2             | -0,259832361 | 0,249604176  | -0,50943654 |  |

|              |                 |              |              |             |  |
|--------------|-----------------|--------------|--------------|-------------|--|
| 243720_at    | -               | -0,259832361 | 0,249604176  | -0,50943654 |  |
| 244666_at    | -               | -0,259832361 | 0,249604176  | -0,50943654 |  |
| 1569809_at   | -               | -3,013665402 | -2,503677622 | -0,50998778 |  |
| 207441_at    | SMR3B           | -3,013665402 | -2,503677622 | -0,50998778 |  |
| 207888_at    | -               | -3,013665402 | -2,503677622 | -0,50998778 |  |
| 219975_x_at  | OLAH            | -3,013665402 | -2,503677622 | -0,50998778 |  |
| 227690_at    | GABRB3          | -3,013665402 | -2,503677622 | -0,50998778 |  |
| 243844_at    | -               | -3,013665402 | -2,503677622 | -0,50998778 |  |
| 234988_at    | VCPIP1          | 0,503742507  | 1,013870809  | -0,5101283  |  |
| 218345_at    | TMEM176A        | 0,181384709  | 0,691645685  | -0,51026098 |  |
| 1569121_at   | SLC25A24        | -0,352951799 | 0,157549243  | -0,51050104 |  |
| 230491_at    | -               | -0,352951799 | 0,157549243  | -0,51050104 |  |
| 238485_at    | IQCH-AS1        | -0,352951799 | 0,157549243  | -0,51050104 |  |
| 1553146_at   | C3orf30         | -2,597496523 | -2,086984744 | -0,51051178 |  |
| 1555068_at   | WNK1            | -2,597496523 | -2,086984744 | -0,51051178 |  |
| 1556284_at   | PPA2            | -2,597496523 | -2,086984744 | -0,51051178 |  |
| 1565774_at   | PIEZO2          | -2,597496523 | -2,086984744 | -0,51051178 |  |
| 1570099_at   | -               | -2,597496523 | -2,086984744 | -0,51051178 |  |
| 216298_at    | TARP            | -2,597496523 | -2,086984744 | -0,51051178 |  |
| 220025_at    | TBR1            | -2,597496523 | -2,086984744 | -0,51051178 |  |
| 231470_at    | LOC400680       | -2,597496523 | -2,086984744 | -0,51051178 |  |
| 234565_x_at  | -               | -2,597496523 | -2,086984744 | -0,51051178 |  |
| 235310_at    | GCET2           | -2,597496523 | -2,086984744 | -0,51051178 |  |
| 222284_at    | -               | 1,631786706  | 2,14244844   | -0,51066173 |  |
| 1552910_at   | SIGLEC11        | -1,888254346 | -1,377419394 | -0,51083495 |  |
| 1553341_at   | UROCI           | -1,888254346 | -1,377419394 | -0,51083495 |  |
| 1559537_at   | RNF130          | -1,888254346 | -1,377419394 | -0,51083495 |  |
| 207385_at    | TFDP3           | -1,888254346 | -1,377419394 | -0,51083495 |  |
| 209733_at    | MID2            | -1,888254346 | -1,377419394 | -0,51083495 |  |
| 219727_at    | DUOX2           | -1,888254346 | -1,377419394 | -0,51083495 |  |
| 223997_at    | FNIP1           | -1,888254346 | -1,377419394 | -0,51083495 |  |
| 227828_s_at  | FAM176A         | -1,888254346 | -1,377419394 | -0,51083495 |  |
| 229613_at    | -               | -1,888254346 | -1,377419394 | -0,51083495 |  |
| 233127_at    | -               | -1,888254346 | -1,377419394 | -0,51083495 |  |
| 233218_at    | -               | -1,888254346 | -1,377419394 | -0,51083495 |  |
| 233394_at    | NFIB            | -1,888254346 | -1,377419394 | -0,51083495 |  |
| 234092_s_at  | TM6SF2          | -1,888254346 | -1,377419394 | -0,51083495 |  |
| 234530_s_at  | ZNRD1           | -1,888254346 | -1,377419394 | -0,51083495 |  |
| 237099_at    | BPIFA2          | -1,888254346 | -1,377419394 | -0,51083495 |  |
| 238629_x_at  | -               | -1,888254346 | -1,377419394 | -0,51083495 |  |
| 238882_at    | -               | -1,888254346 | -1,377419394 | -0,51083495 |  |
| 243975_at    | -               | -1,888254346 | -1,377419394 | -0,51083495 |  |
| 1554997_a_at | PTGS2           | -0,59053611  | -0,079522948 | -0,51101316 |  |
| 1559467_at   | -               | -0,59053611  | -0,079522948 | -0,51101316 |  |
| 222365_at    | -               | -0,59053611  | -0,079522948 | -0,51101316 |  |
| 243653_at    | SHROOM3         | -0,59053611  | -0,079522948 | -0,51101316 |  |
| 209060_x_at  | NCOA3           | 0,735041319  | 1,246149888  | -0,51110857 |  |
| 209088_s_at  | UBN1            | 1,269985355  | 1,781437557  | -0,51114522 |  |
| 207686_s_at  | CASP8           | 0,020670649  | 0,532164371  | -0,51149372 |  |
| 1555409_a_at | BAGE2 /// BAGE3 | -1,047650486 | -0,536087151 | -0,51156333 |  |
| 214325_at    | GP2             | -1,047650486 | -0,536087151 | -0,51156333 |  |
| 236833_at    | TTC16           | -1,047650486 | -0,536087151 | -0,51156333 |  |
| 237044_s_at  | ZNF503-AS2      | -1,047650486 | -0,536087151 | -0,51156333 |  |
| 239002_at    | ASPM            | -1,047650486 | -0,536087151 | -0,51156333 |  |
| 1552542_s_at | TAGAP           | -1,424023738 | -0,912331589 | -0,51169215 |  |
| 203571_s_at  | C10orf116       | -1,424023738 | -0,912331589 | -0,51169215 |  |

|              |                 |              |              |             |  |
|--------------|-----------------|--------------|--------------|-------------|--|
| 206121_at    | AMPD1           | -1,424023738 | -0,912331589 | -0,51169215 |  |
| 216292_at    | -               | -1,424023738 | -0,912331589 | -0,51169215 |  |
| 222746_s_at  | BSPRY           | -1,424023738 | -0,912331589 | -0,51169215 |  |
| 231122_x_at  | ZDHC19          | -1,424023738 | -0,912331589 | -0,51169215 |  |
| 1555737_a_at | KLK4            | -0,79540287  | -0,283667828 | -0,51173504 |  |
| 1558662_s_at | BANK1           | -0,79540287  | -0,283667828 | -0,51173504 |  |
| 214495_at    | CACNG2          | -0,79540287  | -0,283667828 | -0,51173504 |  |
| 235959_at    | -               | -0,79540287  | -0,283667828 | -0,51173504 |  |
| 242719_at    | -               | -0,79540287  | -0,283667828 | -0,51173504 |  |
| 234214_at    | -               | -0,078265071 | 0,433557298  | -0,51182237 |  |
| 202669_s_at  | EFNB2           | 0,760715727  | 1,272721751  | -0,51200602 |  |
| 1563071_at   | LOC100289061    | -0,055687482 | 0,456918297  | -0,51260578 |  |
| 211677_x_at  | CADM3           | -0,055687482 | 0,456918297  | -0,51260578 |  |
| 232280_at    | SLC25A29        | -0,055687482 | 0,456918297  | -0,51260578 |  |
| 1556784_at   | -               | -0,67289328  | -0,160136748 | -0,51275653 |  |
| 204359_at    | FLRT2 /// LOC10 | -0,67289328  | -0,160136748 | -0,51275653 |  |
| 205790_at    | SKAP1           | -0,67289328  | -0,160136748 | -0,51275653 |  |
| 243026_x_at  | XIAP            | 0,255492549  | 0,768343791  | -0,51285124 |  |
| 231973_s_at  | ANAPC1 /// LOC  | 2,208874124  | 2,721978587  | -0,51310446 |  |
| 203061_s_at  | MDC1            | 1,283332461  | 1,796776588  | -0,51344413 |  |
| 1556844_at   | LOC100132078    | -2,551294263 | -2,037551727 | -0,51374254 |  |
| 1560467_at   | PAQR9           | -2,551294263 | -2,037551727 | -0,51374254 |  |
| 1566294_at   | -               | -2,551294263 | -2,037551727 | -0,51374254 |  |
| 1569813_at   | STRN            | -2,551294263 | -2,037551727 | -0,51374254 |  |
| 201650_at    | KRT19           | -2,551294263 | -2,037551727 | -0,51374254 |  |
| 209723_at    | SERPINB9        | -2,551294263 | -2,037551727 | -0,51374254 |  |
| 210867_at    | CNOT4           | -2,551294263 | -2,037551727 | -0,51374254 |  |
| 234030_at    | -               | -2,551294263 | -2,037551727 | -0,51374254 |  |
| 237691_x_at  | ENO3            | -2,551294263 | -2,037551727 | -0,51374254 |  |
| 234924_s_at  | ZNF687          | -0,136301282 | 0,377530647  | -0,51383193 |  |
| 210109_at    | SND1-IT1        | 0,541261317  | 1,055274826  | -0,51401351 |  |
| 242343_x_at  | -               | 2,114952142  | 2,629059192  | -0,51410705 |  |
| 234457_at    | ZNRD1-AS1       | -3,250025915 | -2,735862426 | -0,51416349 |  |
| 1552999_a_at | WFDC10B         | -1,937711681 | -1,423348341 | -0,51436334 |  |
| 1555049_at   | TSPEAR          | -1,937711681 | -1,423348341 | -0,51436334 |  |
| 1555626_a_at | SLAMF1          | -1,937711681 | -1,423348341 | -0,51436334 |  |
| 1556920_s_at | LOC646168       | -1,937711681 | -1,423348341 | -0,51436334 |  |
| 1566697_at   | -               | -1,937711681 | -1,423348341 | -0,51436334 |  |
| 222066_at    | EPB41L1         | -1,937711681 | -1,423348341 | -0,51436334 |  |
| 223523_at    | TMEM108         | -1,937711681 | -1,423348341 | -0,51436334 |  |
| 234345_at    | -               | -1,937711681 | -1,423348341 | -0,51436334 |  |
| 236506_at    | -               | -1,937711681 | -1,423348341 | -0,51436334 |  |
| 237896_at    | NODAL           | -1,937711681 | -1,423348341 | -0,51436334 |  |
| 244001_at    | NAP1L4          | -1,937711681 | -1,423348341 | -0,51436334 |  |
| 244590_at    | -               | -1,937711681 | -1,423348341 | -0,51436334 |  |
| 228830_s_at  | ATF7            | 0,209623097  | 0,724100169  | -0,51447707 |  |
| 212291_at    | HIPK1           | 0,779676066  | 1,294497133  | -0,51482107 |  |
| 201640_x_at  | CLPTM1          | 2,166283906  | 2,681234383  | -0,51495048 |  |
| 1556797_at   | RNF144A-AS1     | 0,123193849  | 0,638150376  | -0,51495653 |  |
| 1555255_a_at | PPIP5K1         | -0,221656139 | 0,293518836  | -0,51517497 |  |
| 239348_at    | -               | -0,221656139 | 0,293518836  | -0,51517497 |  |
| 209417_s_at  | IFI35           | 0,661985843  | 1,177496821  | -0,51551098 |  |
| 1556511_a_at | -               | -2,972500237 | -2,456406426 | -0,51609381 |  |
| 1559283_a_at | CNPY1           | -2,972500237 | -2,456406426 | -0,51609381 |  |
| 1562073_at   | -               | -2,972500237 | -2,456406426 | -0,51609381 |  |
| 1564795_at   | -               | -2,972500237 | -2,456406426 | -0,51609381 |  |

|              |              |              |              |             |  |
|--------------|--------------|--------------|--------------|-------------|--|
| 211601_at    | CATR1        | -2,972500237 | -2,456406426 | -0,51609381 |  |
| 230891_at    | TUBE1        | -2,972500237 | -2,456406426 | -0,51609381 |  |
| 236304_at    | -            | -2,972500237 | -2,456406426 | -0,51609381 |  |
| 240082_s_at  | C17orf74     | -2,972500237 | -2,456406426 | -0,51609381 |  |
| 241034_at    | GLS          | -2,972500237 | -2,456406426 | -0,51609381 |  |
| 243865_x_at  | -            | -2,972500237 | -2,456406426 | -0,51609381 |  |
| 227397_at    | TPM2         | 0,052199481  | 0,568365095  | -0,51616561 |  |
| 203877_at    | MMP11        | -1,196375121 | -0,679763839 | -0,51661128 |  |
| 203902_at    | HEPH         | -1,196375121 | -0,679763839 | -0,51661128 |  |
| 214405_at    | -            | -1,196375121 | -0,679763839 | -0,51661128 |  |
| 228533_at    | -            | -1,196375121 | -0,679763839 | -0,51661128 |  |
| 233951_at    | -            | -1,196375121 | -0,679763839 | -0,51661128 |  |
| 237913_at    | LOC100506348 | -1,196375121 | -0,679763839 | -0,51661128 |  |
| 1557840_at   | EFHB         | -1,131062212 | -0,614371577 | -0,51669064 |  |
| 1565659_at   | FUT6         | -1,131062212 | -0,614371577 | -0,51669064 |  |
| 231171_at    | -            | -1,131062212 | -0,614371577 | -0,51669064 |  |
| 236389_x_at  | -            | -1,131062212 | -0,614371577 | -0,51669064 |  |
| 1555378_at   | DBF4B        | -0,43775896  | 0,079428135  | -0,5171871  |  |
| 221790_s_at  | LDLRAP1      | -0,43775896  | 0,079428135  | -0,5171871  |  |
| 243869_at    | -            | -0,022466681 | 0,495031851  | -0,51749853 |  |
| 1552620_at   | SPRR4        | 1,114389003  | 1,632095957  | -0,51770695 |  |
| 204650_s_at  | APBB3        | 0,317354302  | 0,835239052  | -0,51788475 |  |
| 239592_at    | -            | -0,00073712  | 0,51742585   | -0,51816297 |  |
| 1556294_at   | -            | -2,479842156 | -1,961547147 | -0,51829501 |  |
| 1561732_at   | -            | -2,479842156 | -1,961547147 | -0,51829501 |  |
| 1570441_at   | NAPB         | -2,479842156 | -1,961547147 | -0,51829501 |  |
| 209269_s_at  | SYK          | -2,479842156 | -1,961547147 | -0,51829501 |  |
| 234805_at    | -            | -2,479842156 | -1,961547147 | -0,51829501 |  |
| 236385_at    | -            | -2,479842156 | -1,961547147 | -0,51829501 |  |
| 237926_s_at  | -            | -2,479842156 | -1,961547147 | -0,51829501 |  |
| 240733_at    | -            | -2,479842156 | -1,961547147 | -0,51829501 |  |
| 243838_at    | -            | -2,479842156 | -1,961547147 | -0,51829501 |  |
| 244492_at    | -            | -2,479842156 | -1,961547147 | -0,51829501 |  |
| 244506_at    | TMTC1        | -2,479842156 | -1,961547147 | -0,51829501 |  |
| 1562899_at   | -            | -0,543051993 | -0,024572586 | -0,51847941 |  |
| 201888_s_at  | IL13RA1      | -0,543051993 | -0,024572586 | -0,51847941 |  |
| 218445_at    | H2AFY2       | -0,543051993 | -0,024572586 | -0,51847941 |  |
| 210322_x_at  | UTY          | -2,01371626  | -1,494668682 | -0,51904758 |  |
| 216567_at    | -            | -2,01371626  | -1,494668682 | -0,51904758 |  |
| 220117_at    | ZNF385D      | -2,01371626  | -1,494668682 | -0,51904758 |  |
| 220861_at    | -            | -2,01371626  | -1,494668682 | -0,51904758 |  |
| 223786_at    | CHST6        | -2,01371626  | -1,494668682 | -0,51904758 |  |
| 229524_at    | KIAA0494     | -2,01371626  | -1,494668682 | -0,51904758 |  |
| 230773_at    | ZNF385D      | -2,01371626  | -1,494668682 | -0,51904758 |  |
| 232074_at    | PRSS27       | -2,01371626  | -1,494668682 | -0,51904758 |  |
| 233661_at    | LINC00557    | -2,01371626  | -1,494668682 | -0,51904758 |  |
| 233897_at    | FEZF2        | -2,01371626  | -1,494668682 | -0,51904758 |  |
| 237554_at    | -            | -2,01371626  | -1,494668682 | -0,51904758 |  |
| 240441_at    | FAM99B       | -2,01371626  | -1,494668682 | -0,51904758 |  |
| 242231_at    | -            | -2,01371626  | -1,494668682 | -0,51904758 |  |
| 243230_at    | -            | -2,01371626  | -1,494668682 | -0,51904758 |  |
| 1556003_a_at | LOC100506777 | -1,2845686   | -0,765504029 | -0,51906457 |  |
| 1556304_s_at | LOC100271722 | -1,2845686   | -0,765504029 | -0,51906457 |  |
| 1557316_at   | -            | -1,2845686   | -0,765504029 | -0,51906457 |  |
| 1570155_at   | -            | -1,2845686   | -0,765504029 | -0,51906457 |  |
| 204454_at    | LDOC1        | -1,2845686   | -0,765504029 | -0,51906457 |  |

|              |                 |              |              |             |  |
|--------------|-----------------|--------------|--------------|-------------|--|
| 215825_at    | -               | -1,2845686   | -0,765504029 | -0,51906457 |  |
| 220684_at    | TBX21           | -1,2845686   | -0,765504029 | -0,51906457 |  |
| 221377_s_at  | RBPJL           | -1,2845686   | -0,765504029 | -0,51906457 |  |
| 238987_at    | B4GALT1         | -1,2845686   | -0,765504029 | -0,51906457 |  |
| 244061_at    | -               | -1,2845686   | -0,765504029 | -0,51906457 |  |
| 206551_x_at  | KLHL24          | 2,600539826  | 3,119728903  | -0,51918908 |  |
| 206784_at    | AQP8            | -0,655928373 | -0,136643983 | -0,51928439 |  |
| 231075_x_at  | RAPH1           | -0,655928373 | -0,136643983 | -0,51928439 |  |
| 232307_at    | -               | -0,655928373 | -0,136643983 | -0,51928439 |  |
| 244875_at    | ASMTL-AS1       | -0,655928373 | -0,136643983 | -0,51928439 |  |
| 1554539_a_at | RHOF            | -0,512251684 | 0,007421914  | -0,5196736  |  |
| 208109_s_at  | LINC00597       | -0,512251684 | 0,007421914  | -0,5196736  |  |
| 235899_at    | CA13 /// LOC100 | -0,512251684 | 0,007421914  | -0,5196736  |  |
| 227817_at    | PRKCB           | 0,648296226  | 1,16809119   | -0,51979496 |  |
| 210782_x_at  | GRIN1           | 0,171847695  | 0,691645685  | -0,51979799 |  |
| 206843_at    | CRYBA4          | 0,384950573  | 0,904843258  | -0,51989269 |  |
| 1561503_at   | MYLK4           | 0,57058931   | 1,090553537  | -0,51996423 |  |
| 1553175_s_at | PDE5A           | -1,470833215 | -0,950686014 | -0,5201472  |  |
| 1563178_at   | -               | -1,470833215 | -0,950686014 | -0,5201472  |  |
| 1563324_at   | LOC100129603    | -1,470833215 | -0,950686014 | -0,5201472  |  |
| 1569767_at   | -               | -1,470833215 | -0,950686014 | -0,5201472  |  |
| 208573_s_at  | OR2H2           | -1,470833215 | -0,950686014 | -0,5201472  |  |
| 231035_s_at  | -               | -1,470833215 | -0,950686014 | -0,5201472  |  |
| 237906_at    | -               | -1,470833215 | -0,950686014 | -0,5201472  |  |
| 238118_s_at  | PPOX            | -1,470833215 | -0,950686014 | -0,5201472  |  |
| 239646_at    | -               | -1,470833215 | -0,950686014 | -0,5201472  |  |
| 239752_at    | -               | -1,470833215 | -0,950686014 | -0,5201472  |  |
| 1558802_at   | -               | -2,43257096  | -1,912089812 | -0,52048115 |  |
| 1560135_at   | -               | -2,43257096  | -1,912089812 | -0,52048115 |  |
| 1566807_a_at | -               | -2,43257096  | -1,912089812 | -0,52048115 |  |
| 1569540_at   | -               | -2,43257096  | -1,912089812 | -0,52048115 |  |
| 1569609_at   | -               | -2,43257096  | -1,912089812 | -0,52048115 |  |
| 208512_s_at  | MLLT4           | -2,43257096  | -1,912089812 | -0,52048115 |  |
| 220913_at    | -               | -2,43257096  | -1,912089812 | -0,52048115 |  |
| 221304_at    | UGT1A8          | -2,43257096  | -1,912089812 | -0,52048115 |  |
| 234114_at    | ZNRD1           | -2,43257096  | -1,912089812 | -0,52048115 |  |
| 237851_at    | -               | -2,43257096  | -1,912089812 | -0,52048115 |  |
| 221642_at    | -               | 0,083054335  | 0,603679647  | -0,52062531 |  |
| 229855_at    | RNF34           | -0,622910612 | -0,102100538 | -0,52081007 |  |
| 234948_at    | SLC27A5         | -0,622910612 | -0,102100538 | -0,52081007 |  |
| 242068_at    | -               | -0,622910612 | -0,102100538 | -0,52081007 |  |
| 205948_at    | PTPRT           | -0,741668563 | -0,220592223 | -0,52107634 |  |
| 216337_at    | -               | -0,741668563 | -0,220592223 | -0,52107634 |  |
| 227844_at    | FMNL3           | -0,741668563 | -0,220592223 | -0,52107634 |  |
| 243218_at    | -               | -0,741668563 | -0,220592223 | -0,52107634 |  |
| 1556171_a_at | -               | -2,063149277 | -1,541908042 | -0,52124124 |  |
| 1562106_at   | -               | -2,063149277 | -1,541908042 | -0,52124124 |  |
| 1562925_at   | -               | -2,063149277 | -1,541908042 | -0,52124124 |  |
| 215613_at    | ADAM12          | -2,063149277 | -1,541908042 | -0,52124124 |  |
| 229503_at    | SLC15A4         | -2,063149277 | -1,541908042 | -0,52124124 |  |
| 233650_at    | CEP63           | -2,063149277 | -1,541908042 | -0,52124124 |  |
| 234851_at    | IGLC1           | -2,063149277 | -1,541908042 | -0,52124124 |  |
| 235820_at    | ERC1            | -2,063149277 | -1,541908042 | -0,52124124 |  |
| 237359_at    | -               | -2,063149277 | -1,541908042 | -0,52124124 |  |
| 238635_at    | C5orf28         | -2,063149277 | -1,541908042 | -0,52124124 |  |
| 243693_at    | -               | -2,063149277 | -1,541908042 | -0,52124124 |  |

|              |                 |              |              |             |  |
|--------------|-----------------|--------------|--------------|-------------|--|
| 244549_at    | -               | -2,063149277 | -1,541908042 | -0,52124124 |  |
| 1561151_a_at | -               | -3,212234735 | -2,690860744 | -0,52137399 |  |
| 214569_at    | IFNA5           | -3,212234735 | -2,690860744 | -0,52137399 |  |
| 235708_at    | KLB             | -3,212234735 | -2,690860744 | -0,52137399 |  |
| 238663_x_at  | GRIA4           | -3,212234735 | -2,690860744 | -0,52137399 |  |
| 1560107_at   | -               | -2,930741289 | -2,408705138 | -0,52203615 |  |
| 204591_at    | CHL1            | -2,930741289 | -2,408705138 | -0,52203615 |  |
| 209683_at    | FAM49A          | -2,930741289 | -2,408705138 | -0,52203615 |  |
| 213142_x_at  | PION            | -2,930741289 | -2,408705138 | -0,52203615 |  |
| 231645_s_at  | -               | -2,930741289 | -2,408705138 | -0,52203615 |  |
| 241298_x_at  | -               | -2,930741289 | -2,408705138 | -0,52203615 |  |
| 241432_at    | SLIT2-IT1       | -2,930741289 | -2,408705138 | -0,52203615 |  |
| 242013_at    | BCL2L15         | -2,930741289 | -2,408705138 | -0,52203615 |  |
| 221948_s_at  | KLHL22          | -1,089016378 | -0,566887459 | -0,52212892 |  |
| 227058_at    | C13orf33        | -1,089016378 | -0,566887459 | -0,52212892 |  |
| 228804_at    | DGCR5 /// LOC1  | -1,089016378 | -0,566887459 | -0,52212892 |  |
| 234951_s_at  | COL12A1         | -1,089016378 | -0,566887459 | -0,52212892 |  |
| 1558804_at   | -               | -2,384869671 | -1,862647763 | -0,52222191 |  |
| 1563370_at   | -               | -2,384869671 | -1,862647763 | -0,52222191 |  |
| 1563887_at   | INTS4L1         | -2,384869671 | -1,862647763 | -0,52222191 |  |
| 222069_s_at  | -               | -2,384869671 | -1,862647763 | -0,52222191 |  |
| 222908_at    | PIEZO2          | -2,384869671 | -1,862647763 | -0,52222191 |  |
| 223672_at    | SGIP1           | -2,384869671 | -1,862647763 | -0,52222191 |  |
| 223970_at    | RETNLB          | -2,384869671 | -1,862647763 | -0,52222191 |  |
| 234822_at    | -               | -2,384869671 | -1,862647763 | -0,52222191 |  |
| 244027_at    | -               | -2,384869671 | -1,862647763 | -0,52222191 |  |
| 244530_at    | -               | -2,384869671 | -1,862647763 | -0,52222191 |  |
| 221247_s_at  | LOC653375 /// W | 2,048758794  | 2,571362843  | -0,52260405 |  |
| 208989_s_at  | KDM2A           | 0,984222186  | 1,507116528  | -0,52289434 |  |
| 1560523_at   | -               | -2,138804305 | -1,615132408 | -0,5236719  |  |
| 1563770_at   | ZBTB8B          | -2,138804305 | -1,615132408 | -0,5236719  |  |
| 206199_at    | CEACAM7         | -2,138804305 | -1,615132408 | -0,5236719  |  |
| 208221_s_at  | ARHGAP19 /// SL | -2,138804305 | -1,615132408 | -0,5236719  |  |
| 216756_at    | -               | -2,138804305 | -1,615132408 | -0,5236719  |  |
| 217434_at    | MC2R            | -2,138804305 | -1,615132408 | -0,5236719  |  |
| 219732_at    | LPPR1           | -2,138804305 | -1,615132408 | -0,5236719  |  |
| 220381_at    | ARHGAP28        | -2,138804305 | -1,615132408 | -0,5236719  |  |
| 234804_at    | PROX2           | -2,138804305 | -1,615132408 | -0,5236719  |  |
| 237241_at    | ECT2            | -2,138804305 | -1,615132408 | -0,5236719  |  |
| 240219_at    | LINC00327       | -2,138804305 | -1,615132408 | -0,5236719  |  |
| 240615_at    | PTOV1-AS1       | -2,138804305 | -1,615132408 | -0,5236719  |  |
| 242526_at    | -               | -2,138804305 | -1,615132408 | -0,5236719  |  |
| 242811_x_at  | -               | -2,138804305 | -1,615132408 | -0,5236719  |  |
| 243096_at    | -               | -2,138804305 | -1,615132408 | -0,5236719  |  |
| 214693_x_at  | LOC100506032 /  | 0,945567441  | 1,469325098  | -0,52375766 |  |
| 1553927_at   | C7orf33         | -2,311268652 | -1,787089803 | -0,52417885 |  |
| 1555456_at   | -               | -2,311268652 | -1,787089803 | -0,52417885 |  |
| 1558342_x_at | DIXDC1          | -2,311268652 | -1,787089803 | -0,52417885 |  |
| 1562083_at   | -               | -2,311268652 | -1,787089803 | -0,52417885 |  |
| 229791_at    | LPCAT2          | -2,311268652 | -1,787089803 | -0,52417885 |  |
| 233205_at    | -               | -2,311268652 | -1,787089803 | -0,52417885 |  |
| 236052_at    | TRNP1           | -2,311268652 | -1,787089803 | -0,52417885 |  |
| 241092_at    | -               | -2,311268652 | -1,787089803 | -0,52417885 |  |
| 244653_at    | SETD7           | -2,311268652 | -1,787089803 | -0,52417885 |  |
| 222087_at    | MIR1204         | 0,541261317  | 1,065442793  | -0,52418148 |  |
| 204190_at    | USPL1           | 2,406821352  | 2,93104672   | -0,52422537 |  |

|              |                |              |              |             |  |
|--------------|----------------|--------------|--------------|-------------|--|
| 1559489_a_at | LOC257358      | -0,366776884 | 0,157549243  | -0,52432613 |  |
| 1552911_at   | SIGLEC11       | -2,187914861 | -1,663414495 | -0,52450037 |  |
| 1558719_s_at | RPAIN          | -2,187914861 | -1,663414495 | -0,52450037 |  |
| 1560634_a_at | -              | -2,187914861 | -1,663414495 | -0,52450037 |  |
| 1560963_a_at | -              | -2,187914861 | -1,663414495 | -0,52450037 |  |
| 205064_at    | SPRR1B         | -2,187914861 | -1,663414495 | -0,52450037 |  |
| 205869_at    | PRSS1          | -2,187914861 | -1,663414495 | -0,52450037 |  |
| 207906_at    | IL3            | -2,187914861 | -1,663414495 | -0,52450037 |  |
| 213169_at    | SEMA5A         | -2,187914861 | -1,663414495 | -0,52450037 |  |
| 216318_at    | IGHA1          | -2,187914861 | -1,663414495 | -0,52450037 |  |
| 218353_at    | RGS5           | -2,187914861 | -1,663414495 | -0,52450037 |  |
| 219791_s_at  | NBLA00301      | -2,187914861 | -1,663414495 | -0,52450037 |  |
| 227340_s_at  | RGMB           | -2,187914861 | -1,663414495 | -0,52450037 |  |
| 230088_at    | -              | -2,187914861 | -1,663414495 | -0,52450037 |  |
| 231037_at    | -              | -2,187914861 | -1,663414495 | -0,52450037 |  |
| 233293_at    | NPAS3          | -2,187914861 | -1,663414495 | -0,52450037 |  |
| 240085_at    | -              | -2,187914861 | -1,663414495 | -0,52450037 |  |
| 1559813_at   | -              | -2,262747984 | -1,738067356 | -0,52468063 |  |
| 1561125_at   | MTHFD1L        | -2,262747984 | -1,738067356 | -0,52468063 |  |
| 1561740_at   | -              | -2,262747984 | -1,738067356 | -0,52468063 |  |
| 206340_at    | NR1H4          | -2,262747984 | -1,738067356 | -0,52468063 |  |
| 207763_at    | S100A5         | -2,262747984 | -1,738067356 | -0,52468063 |  |
| 213522_s_at  | SLC16A3        | -2,262747984 | -1,738067356 | -0,52468063 |  |
| 236021_at    | -              | -2,262747984 | -1,738067356 | -0,52468063 |  |
| 237358_at    | -              | -2,262747984 | -1,738067356 | -0,52468063 |  |
| 229684_s_at  | ZNF644         | -0,986356909 | -0,461594427 | -0,52476248 |  |
| 230639_at    | ICA1           | -0,986356909 | -0,461594427 | -0,52476248 |  |
| 231062_at    | DOCK9-AS2      | -0,986356909 | -0,461594427 | -0,52476248 |  |
| 235277_at    | AMOTL1         | -0,986356909 | -0,461594427 | -0,52476248 |  |
| 237621_at    | LOC100507007   | -0,986356909 | -0,461594427 | -0,52476248 |  |
| 241161_at    | -              | -0,986356909 | -0,461594427 | -0,52476248 |  |
| 244090_at    | -              | -0,986356909 | -0,461594427 | -0,52476248 |  |
| 1553238_a_at | HIPK4          | -0,172274514 | 0,352836757  | -0,52511127 |  |
| 216094_at    | -              | -0,172274514 | 0,352836757  | -0,52511127 |  |
| 233339_s_at  | ARID1B         | -0,496991414 | 0,028364014  | -0,52535543 |  |
| 238179_at    | LOC100506268   | -0,496991414 | 0,028364014  | -0,52535543 |  |
| 240148_at    | -              | -0,496991414 | 0,028364014  | -0,52535543 |  |
| 242942_at    | SLC38A10       | -0,496991414 | 0,028364014  | -0,52535543 |  |
| 222569_at    | UGGT1          | 1,233777334  | 1,759685182  | -0,52590785 |  |
| 216702_x_at  | -              | 0,291166226  | 0,817300337  | -0,52613411 |  |
| 211396_at    | FCGR2C         | -0,467091869 | 0,059218869  | -0,52631074 |  |
| 217790_s_at  | SSR3           | 0,627515113  | 1,153866761  | -0,52635165 |  |
| 224469_s_at  | INF2           | 0,97328325   | 1,499637023  | -0,52635377 |  |
| 1557239_at   | BBX            | -1,639579028 | -1,112851844 | -0,52672718 |  |
| 205359_at    | AKAP6          | -1,639579028 | -1,112851844 | -0,52672718 |  |
| 207615_s_at  | C16orf3        | -1,639579028 | -1,112851844 | -0,52672718 |  |
| 215062_at    | -              | -1,639579028 | -1,112851844 | -0,52672718 |  |
| 216813_at    | -              | -1,639579028 | -1,112851844 | -0,52672718 |  |
| 221120_at    | -              | -1,639579028 | -1,112851844 | -0,52672718 |  |
| 224770_s_at  | NAV1           | -1,639579028 | -1,112851844 | -0,52672718 |  |
| 226809_at    | LOC100216479 / | -1,639579028 | -1,112851844 | -0,52672718 |  |
| 228509_at    | SPHKAP         | -1,639579028 | -1,112851844 | -0,52672718 |  |
| 232054_at    | PCDH20         | -1,639579028 | -1,112851844 | -0,52672718 |  |
| 243284_at    | AAGAB          | -1,639579028 | -1,112851844 | -0,52672718 |  |
| 243802_at    | DNAH12         | -1,639579028 | -1,112851844 | -0,52672718 |  |
| 1566097_at   | -              | -1,173767127 | -0,646746079 | -0,52702105 |  |

|              |                 |              |              |             |  |
|--------------|-----------------|--------------|--------------|-------------|--|
| 212813_at    | JAM3            | -1,173767127 | -0,646746079 | -0,52702105 |  |
| 213972_at    | -               | -1,173767127 | -0,646746079 | -0,52702105 |  |
| 228898_s_at  | SMARCB1         | -1,173767127 | -0,646746079 | -0,52702105 |  |
| 231965_at    | PCED1A          | -1,173767127 | -0,646746079 | -0,52702105 |  |
| 1555275_a_at | KLHL6           | -0,259832361 | 0,26733076   | -0,52716312 |  |
| 212079_s_at  | MLL             | -0,259832361 | 0,26733076   | -0,52716312 |  |
| 220291_at    | GDPD2           | 0,209623097  | 0,73688026   | -0,52725716 |  |
| 1565905_at   | FLJ46026        | -0,234278768 | 0,293518836  | -0,5277976  |  |
| 200831_s_at  | LOC100652751 /  | 3,545499171  | 4,073389758  | -0,52789059 |  |
| 1553041_at   | HTR3C           | -0,85085127  | -0,322870281 | -0,52798099 |  |
| 1557240_a_at | -               | -0,85085127  | -0,322870281 | -0,52798099 |  |
| 225975_at    | PCDH18          | -0,85085127  | -0,322870281 | -0,52798099 |  |
| 236876_at    | H1FNT           | -0,85085127  | -0,322870281 | -0,52798099 |  |
| 1558832_at   | SLC2A1-AS1      | -0,946847173 | -0,41858459  | -0,52826258 |  |
| 205547_s_at  | TAGLN           | -0,946847173 | -0,41858459  | -0,52826258 |  |
| 208215_x_at  | DRD4            | -0,946847173 | -0,41858459  | -0,52826258 |  |
| 211580_s_at  | PIK3R3          | -0,946847173 | -0,41858459  | -0,52826258 |  |
| 213486_at    | COPG2IT1        | -0,946847173 | -0,41858459  | -0,52826258 |  |
| 232700_at    | -               | -0,946847173 | -0,41858459  | -0,52826258 |  |
| 239423_at    | -               | -0,946847173 | -0,41858459  | -0,52826258 |  |
| 222457_s_at  | LIMA1           | 1,079110292  | 1,60795124   | -0,52884095 |  |
| 229590_at    | RPL13 /// SNORL | 0,648296226  | 1,177496821  | -0,5292006  |  |
| 1555724_s_at | TAGLN           | -0,352951799 | 0,176436073  | -0,52938787 |  |
| 225423_x_at  | MRPL41          | -0,352951799 | 0,176436073  | -0,52938787 |  |
| 238855_at    | AHNAK           | -0,352951799 | 0,176436073  | -0,52938787 |  |
| 241423_at    | ZBED3-AS1       | -0,352951799 | 0,176436073  | -0,52938787 |  |
| 224510_s_at  | CLPB            | -0,325749314 | 0,204310755  | -0,53006007 |  |
| 240223_at    | SLC2A9          | -0,325749314 | 0,204310755  | -0,53006007 |  |
| 204101_at    | MTM1            | -0,136301282 | 0,393761504  | -0,53006279 |  |
| 237330_at    | -               | 0,334552598  | 0,864649967  | -0,53009737 |  |
| 1555659_a_at | TREML1          | -0,112808516 | 0,417770464  | -0,53057898 |  |
| 236062_at    | -               | -0,112808516 | 0,417770464  | -0,53057898 |  |
| 242878_at    | -               | 0,715481152  | 1,246149888  | -0,53066874 |  |
| 41469_at     | PI3             | -1,790712869 | -1,259763041 | -0,53094983 |  |
| 1552895_a_at | ANKRD30BP2      | -2,866296344 | -2,335104118 | -0,53119223 |  |
| 1554707_at   | SPATA6L         | -2,866296344 | -2,335104118 | -0,53119223 |  |
| 1561271_at   | CCDC144C        | -2,866296344 | -2,335104118 | -0,53119223 |  |
| 1561680_at   | -               | -2,866296344 | -2,335104118 | -0,53119223 |  |
| 1562777_at   | ERV3-1          | -2,866296344 | -2,335104118 | -0,53119223 |  |
| 217412_at    | -               | -2,866296344 | -2,335104118 | -0,53119223 |  |
| 228504_at    | SCN7A           | -2,866296344 | -2,335104118 | -0,53119223 |  |
| 234260_at    | -               | -2,866296344 | -2,335104118 | -0,53119223 |  |
| 240852_at    | -               | -2,866296344 | -2,335104118 | -0,53119223 |  |
| 201981_at    | PAPPA           | 1,187200746  | 1,718396606  | -0,53119586 |  |
| 1566805_at   | -               | -3,37835     | -2,847001814 | -0,53134819 |  |
| 1569406_at   | -               | -3,37835     | -2,847001814 | -0,53134819 |  |
| 240927_at    | -               | -3,37835     | -2,847001814 | -0,53134819 |  |
| 218454_at    | PLBD1           | 0,401366113  | 0,932882274  | -0,53151616 |  |
| 1562852_at   | -               | 0,533835206  | 1,065442793  | -0,53160759 |  |
| 223019_at    | FAM129B         | 0,95671774   | 1,488344553  | -0,53162681 |  |
| 1569634_at   | SEPSECS         | 0,273439642  | 0,805216064  | -0,53177642 |  |
| 239264_at    | -               | 0,792179257  | 1,324440845  | -0,53226159 |  |
| 222854_s_at  | GEMIN8          | -0,221656139 | 0,310717132  | -0,53237327 |  |
| 225803_at    | FBXO32          | -0,423248115 | 0,109221392  | -0,53246951 |  |
| 238995_at    | SULT1A1         | -0,423248115 | 0,109221392  | -0,53246951 |  |
| 1553663_a_at | NPB             | 1,46610492   | 1,998633167  | -0,53252825 |  |



|              |           |              |              |             |  |
|--------------|-----------|--------------|--------------|-------------|--|
| 1562353_x_at | -         | -3,15396682  | -2,621331989 | -0,53263483 |  |
| 207054_at    | IMPG1     | -3,15396682  | -2,621331989 | -0,53263483 |  |
| 217067_s_at  | DMP1      | -3,15396682  | -2,621331989 | -0,53263483 |  |
| 221177_at    | MIA2      | -3,15396682  | -2,621331989 | -0,53263483 |  |
| 227261_at    | KLF12     | 0,171847695  | 0,704715219  | -0,53286752 |  |
| 235826_at    | -         | -0,196756757 | 0,336136178  | -0,53289293 |  |
| 230533_at    | ZMYND8    | 0,928678725  | 1,461646549  | -0,53296782 |  |
| 1553435_at   | C18orf15  | -1,543331864 | -1,010192375 | -0,53313949 |  |
| 1554786_at   | CASS4     | -1,543331864 | -1,010192375 | -0,53313949 |  |
| 210193_at    | MOBP      | -1,543331864 | -1,010192375 | -0,53313949 |  |
| 222292_at    | CD40      | -1,543331864 | -1,010192375 | -0,53313949 |  |
| 223830_s_at  | TRIM5     | -1,543331864 | -1,010192375 | -0,53313949 |  |
| 229992_at    | LOC149837 | -1,543331864 | -1,010192375 | -0,53313949 |  |
| 230064_at    | -         | -1,543331864 | -1,010192375 | -0,53313949 |  |
| 230834_at    | -         | -1,543331864 | -1,010192375 | -0,53313949 |  |
| 234720_s_at  | TOB2      | -1,543331864 | -1,010192375 | -0,53313949 |  |
| 241699_at    | -         | -1,543331864 | -1,010192375 | -0,53313949 |  |
| 242776_at    | ZCCHC6    | -1,543331864 | -1,010192375 | -0,53313949 |  |
| 243818_at    | SFTA1P    | -1,543331864 | -1,010192375 | -0,53313949 |  |
| 1552569_a_at | RTP3      | -1,688127507 | -1,154897679 | -0,53322983 |  |
| 1562926_at   | -         | -1,688127507 | -1,154897679 | -0,53322983 |  |
| 1563674_at   | FCRL2     | -1,688127507 | -1,154897679 | -0,53322983 |  |
| 211274_at    | TBX1      | -1,688127507 | -1,154897679 | -0,53322983 |  |
| 211429_s_at  | SERPINA1  | -1,688127507 | -1,154897679 | -0,53322983 |  |
| 214284_s_at  | FGF18     | -1,688127507 | -1,154897679 | -0,53322983 |  |
| 221366_at    | NKX6-1    | -1,688127507 | -1,154897679 | -0,53322983 |  |
| 236319_at    | -         | -1,688127507 | -1,154897679 | -0,53322983 |  |
| 239817_at    | -         | -1,688127507 | -1,154897679 | -0,53322983 |  |
| 221838_at    | KLHL22    | 0,020670649  | 0,553993624  | -0,53332297 |  |
| 216382_s_at  | MLL2      | 0,97328325   | 1,507116528  | -0,53383328 |  |
| 1557123_a_at | CHADL     | -1,353583928 | -0,819238336 | -0,53434559 |  |
| 1561446_at   | -         | -1,353583928 | -0,819238336 | -0,53434559 |  |
| 217006_x_at  | FASN      | -1,353583928 | -0,819238336 | -0,53434559 |  |
| 217150_s_at  | NF2       | -1,353583928 | -0,819238336 | -0,53434559 |  |
| 219677_at    | SPSB1     | -1,353583928 | -0,819238336 | -0,53434559 |  |
| 219921_s_at  | DOCK5     | -1,353583928 | -0,819238336 | -0,53434559 |  |
| 230806_s_at  | FAM65A    | -1,353583928 | -0,819238336 | -0,53434559 |  |
| 239800_at    | UMPS      | -1,353583928 | -0,819238336 | -0,53434559 |  |
| 241221_at    | SEC14L3   | -1,353583928 | -0,819238336 | -0,53434559 |  |
| 243066_at    | NPL       | -1,353583928 | -0,819238336 | -0,53434559 |  |
| 243471_at    | -         | -1,353583928 | -0,819238336 | -0,53434559 |  |
| 244562_s_at  | -         | -1,353583928 | -0,819238336 | -0,53434559 |  |
| 219214_s_at  | NT5C      | 0,555999837  | 1,090553537  | -0,5345537  |  |
| 1556397_at   | -         | -0,078265071 | 0,456918297  | -0,53518337 |  |
| 215083_at    | -         | -0,078265071 | 0,456918297  | -0,53518337 |  |
| 216601_at    | AOC4      | -0,078265071 | 0,456918297  | -0,53518337 |  |
| 225292_at    | COL27A1   | -0,078265071 | 0,456918297  | -0,53518337 |  |
| 216745_x_at  | -         | 0,945567441  | 1,480766833  | -0,53519939 |  |
| 211332_x_at  | HFE       | -0,285837228 | 0,249604176  | -0,5354414  |  |
| 216562_at    | -         | -0,285837228 | 0,249604176  | -0,5354414  |  |
| 235139_at    | GNGT2     | -0,285837228 | 0,249604176  | -0,5354414  |  |
| 1566163_at   | -         | -1,026571149 | -0,490927335 | -0,53564381 |  |
| 229121_at    | CMKLR1    | -1,026571149 | -0,490927335 | -0,53564381 |  |
| 233470_at    | PTPN5     | -1,026571149 | -0,490927335 | -0,53564381 |  |
| 238112_at    | LOC283177 | -1,026571149 | -0,490927335 | -0,53564381 |  |
| 242269_at    | FLJ42875  | -1,026571149 | -0,490927335 | -0,53564381 |  |

|              |              |              |              |             |  |
|--------------|--------------|--------------|--------------|-------------|--|
| 243464_at    | -            | -1,026571149 | -0,490927335 | -0,53564381 |  |
| 1554228_a_at | C8orf56      | -0,926850548 | -0,39061235  | -0,5362382  |  |
| 203108_at    | GPRC5A       | -0,926850548 | -0,39061235  | -0,5362382  |  |
| 207055_at    | GPR37L1      | -0,926850548 | -0,39061235  | -0,5362382  |  |
| 209640_at    | PML          | -0,926850548 | -0,39061235  | -0,5362382  |  |
| 212143_s_at  | IGFBP3       | -0,926850548 | -0,39061235  | -0,5362382  |  |
| 218892_at    | DCHS1        | -0,926850548 | -0,39061235  | -0,5362382  |  |
| 229807_s_at  | -            | -0,67289328  | -0,136643983 | -0,5362493  |  |
| 216803_at    | PDLIM5       | -2,823166348 | -2,286583451 | -0,5365829  |  |
| 222373_at    | -            | -2,823166348 | -2,286583451 | -0,5365829  |  |
| 241299_at    | -            | -2,823166348 | -2,286583451 | -0,5365829  |  |
| 242101_at    | -            | -2,823166348 | -2,286583451 | -0,5365829  |  |
| 230337_at    | SOS1         | 1,05337236   | 1,590454215  | -0,53708186 |  |
| 1554531_at   | TTC12        | 0,03125738   | 0,568365095  | -0,53710772 |  |
| 237176_at    | -            | 0,03125738   | 0,568365095  | -0,53710772 |  |
| 201136_at    | PLP2         | -0,79540287  | -0,258114234 | -0,53728864 |  |
| 209995_s_at  | TCL1A        | -0,79540287  | -0,258114234 | -0,53728864 |  |
| 242989_at    | STRN         | -0,79540287  | -0,258114234 | -0,53728864 |  |
| 212695_at    | CRY2         | 0,841135803  | 1,378453643  | -0,53731784 |  |
| 1568605_at   | JRK          | 0,962260738  | 1,499637023  | -0,53737628 |  |
| 227931_at    | INO80D       | 0,052199481  | 0,589657387  | -0,53745791 |  |
| 202574_s_at  | CSNK1G2      | 2,156646206  | 2,694398145  | -0,53775194 |  |
| 218457_s_at  | DNMT3A       | 0,606430281  | 1,144305291  | -0,53787501 |  |
| 202804_at    | ABCC1        | 2,790121796  | 3,32832922   | -0,53820742 |  |
| 239171_at    | -            | 0,133056859  | 0,67181667   | -0,53875981 |  |
| 235396_at    | C22orf25     | 1,360921491  | 1,899812471  | -0,53889098 |  |
| 1554360_at   | FCHSD2       | -0,888496123 | -0,34958478  | -0,53891134 |  |
| 1557021_s_at | LOC100507250 | -0,888496123 | -0,34958478  | -0,53891134 |  |
| 1563482_at   | -            | -0,888496123 | -0,34958478  | -0,53891134 |  |
| 216347_s_at  | PPP1R13B     | -0,888496123 | -0,34958478  | -0,53891134 |  |
| 230516_at    | MALSU1       | -0,888496123 | -0,34958478  | -0,53891134 |  |
| 232226_at    | LRRC4C       | -0,888496123 | -0,34958478  | -0,53891134 |  |
| 232966_at    | LPIN3        | -0,888496123 | -0,34958478  | -0,53891134 |  |
| 210557_x_at  | CSF1         | -0,759588698 | -0,220592223 | -0,53899647 |  |
| 239743_at    | SP8          | -0,759588698 | -0,220592223 | -0,53899647 |  |
| 240516_at    | -            | -0,759588698 | -0,220592223 | -0,53899647 |  |
| 240690_at    | -            | -0,759588698 | -0,220592223 | -0,53899647 |  |
| 240963_x_at  | PLXDC1       | -0,759588698 | -0,220592223 | -0,53899647 |  |
| 1556778_at   | -            | -3,114791413 | -2,575129729 | -0,53966168 |  |
| 1557533_at   | -            | -3,114791413 | -2,575129729 | -0,53966168 |  |
| 1565760_at   | -            | -3,114791413 | -2,575129729 | -0,53966168 |  |
| 220851_at    | -            | -3,114791413 | -2,575129729 | -0,53966168 |  |
| 231495_at    | -            | -3,114791413 | -2,575129729 | -0,53966168 |  |
| 228253_at    | LOXL3        | 2,512607472  | 3,052311115  | -0,53970364 |  |
| 1555913_at   | GON4L        | -0,022466681 | 0,51742585   | -0,53989253 |  |
| 220147_s_at  | FAM60A       | 3,66163142   | 4,201658983  | -0,54002756 |  |
| 225109_at    | OGFOD1       | 0,228146222  | 0,768343791  | -0,54019757 |  |
| 227988_s_at  | VPS13A       | 0,613492853  | 1,153866761  | -0,54037391 |  |
| 212268_at    | SERPINB1     | 3,340506684  | 3,880994209  | -0,54048752 |  |
| 1555808_a_at | EXD2         | -0,512251684 | 0,028364014  | -0,5406157  |  |
| 216751_at    | -            | -0,512251684 | 0,028364014  | -0,5406157  |  |
| 1552839_at   | FAM71D       | -1,964176657 | -1,423348341 | -0,54082832 |  |
| 1555914_a_at | EXD3         | -1,964176657 | -1,423348341 | -0,54082832 |  |
| 1555947_at   | FAM120A      | -1,964176657 | -1,423348341 | -0,54082832 |  |
| 1560817_at   | -            | -1,964176657 | -1,423348341 | -0,54082832 |  |
| 208275_x_at  | UTF1         | -1,964176657 | -1,423348341 | -0,54082832 |  |

|              |              |              |              |             |  |
|--------------|--------------|--------------|--------------|-------------|--|
| 208479_at    | KCNA1        | -1,964176657 | -1,423348341 | -0,54082832 |  |
| 237764_at    | -            | -1,964176657 | -1,423348341 | -0,54082832 |  |
| 240451_at    | -            | -1,964176657 | -1,423348341 | -0,54082832 |  |
| 241639_at    | -            | -1,964176657 | -1,423348341 | -0,54082832 |  |
| 243885_x_at  | -            | -1,964176657 | -1,423348341 | -0,54082832 |  |
| 1553043_a_at | CD300LF      | -1,591296941 | -1,050406615 | -0,54089033 |  |
| 1555321_at   | ACOT11       | -1,591296941 | -1,050406615 | -0,54089033 |  |
| 1561141_at   | -            | -1,591296941 | -1,050406615 | -0,54089033 |  |
| 207689_at    | TBX10        | -1,591296941 | -1,050406615 | -0,54089033 |  |
| 208018_s_at  | HCK          | -1,591296941 | -1,050406615 | -0,54089033 |  |
| 216289_at    | GPR144       | -1,591296941 | -1,050406615 | -0,54089033 |  |
| 229576_s_at  | TBX3         | -1,591296941 | -1,050406615 | -0,54089033 |  |
| 234234_at    | -            | -1,591296941 | -1,050406615 | -0,54089033 |  |
| 240641_at    | -            | -1,591296941 | -1,050406615 | -0,54089033 |  |
| 1556976_s_at | -            | 0,334552598  | 0,876248481  | -0,54169588 |  |
| 1553316_at   | GPR82        | -1,308181863 | -0,765504029 | -0,54267783 |  |
| 1554501_at   | TSC22D4      | -1,308181863 | -0,765504029 | -0,54267783 |  |
| 204378_at    | BCAS1        | -1,308181863 | -0,765504029 | -0,54267783 |  |
| 207372_s_at  | ENTPD2       | -1,308181863 | -0,765504029 | -0,54267783 |  |
| 214767_s_at  | HSPB6        | -1,308181863 | -0,765504029 | -0,54267783 |  |
| 219761_at    | CLEC1A       | -1,308181863 | -0,765504029 | -0,54267783 |  |
| 220499_at    | FNDC8        | -1,308181863 | -0,765504029 | -0,54267783 |  |
| 225408_at    | MBP          | -1,308181863 | -0,765504029 | -0,54267783 |  |
| 239940_at    | -            | -1,308181863 | -0,765504029 | -0,54267783 |  |
| 241668_s_at  | -            | -1,308181863 | -0,765504029 | -0,54267783 |  |
| 244564_at    | -            | -1,308181863 | -0,765504029 | -0,54267783 |  |
| 1560480_at   | -            | 0,417596971  | 0,960386719  | -0,54278975 |  |
| 235191_at    | -            | 1,089278259  | 1,632095957  | -0,5428177  |  |
| 1556203_a_at | SRGAP2       | -1,763254337 | -1,220210588 | -0,54304375 |  |
| 1557341_x_at | -            | -1,763254337 | -1,220210588 | -0,54304375 |  |
| 207073_at    | CDKL2        | -1,763254337 | -1,220210588 | -0,54304375 |  |
| 217210_at    | -            | -1,763254337 | -1,220210588 | -0,54304375 |  |
| 217477_at    | PIP5K1B      | -1,763254337 | -1,220210588 | -0,54304375 |  |
| 238221_at    | -            | -1,763254337 | -1,220210588 | -0,54304375 |  |
| 238956_at    | EFNA2        | -1,763254337 | -1,220210588 | -0,54304375 |  |
| 240779_at    | -            | -1,763254337 | -1,220210588 | -0,54304375 |  |
| 242172_at    | -            | -1,763254337 | -1,220210588 | -0,54304375 |  |
| 1556435_at   | LOC400622    | -2,504600601 | -1,961547147 | -0,54305345 |  |
| 1558862_at   | NBPF5        | -2,504600601 | -1,961547147 | -0,54305345 |  |
| 1562145_at   | -            | -2,504600601 | -1,961547147 | -0,54305345 |  |
| 1563886_at   | -            | -2,504600601 | -1,961547147 | -0,54305345 |  |
| 1566541_at   | -            | -2,504600601 | -1,961547147 | -0,54305345 |  |
| 205952_at    | KCNK3        | -2,504600601 | -1,961547147 | -0,54305345 |  |
| 206253_at    | DLG2         | -2,504600601 | -1,961547147 | -0,54305345 |  |
| 214457_at    | HOXA2        | -2,504600601 | -1,961547147 | -0,54305345 |  |
| 220390_at    | AGBL2        | -2,504600601 | -1,961547147 | -0,54305345 |  |
| 228788_at    | YPEL1        | -2,504600601 | -1,961547147 | -0,54305345 |  |
| 231738_at    | PCDHB7       | -2,504600601 | -1,961547147 | -0,54305345 |  |
| 234483_at    | ACSS1        | -2,504600601 | -1,961547147 | -0,54305345 |  |
| 237732_at    | PRR9         | -2,504600601 | -1,961547147 | -0,54305345 |  |
| 240096_at    | LOC100506236 | -2,504600601 | -1,961547147 | -0,54305345 |  |
| 209002_s_at  | CALCOCO1     | 0,457392764  | 1,000684521  | -0,54329176 |  |
| 211402_x_at  | NR6A1        | -0,622910612 | -0,079522948 | -0,54338766 |  |
| 1559817_at   | LOC100288798 | -1,399512875 | -0,855751026 | -0,54376185 |  |
| 1561018_at   | -            | -1,399512875 | -0,855751026 | -0,54376185 |  |
| 1569517_at   | LOC646482    | -1,399512875 | -0,855751026 | -0,54376185 |  |

|              |              |              |              |             |  |
|--------------|--------------|--------------|--------------|-------------|--|
| 1569685_at   | -            | -1,399512875 | -0,855751026 | -0,54376185 |  |
| 206450_at    | DBH          | -1,399512875 | -0,855751026 | -0,54376185 |  |
| 215738_at    | LINC00563    | -1,399512875 | -0,855751026 | -0,54376185 |  |
| 217486_s_at  | ZDHC17       | -1,399512875 | -0,855751026 | -0,54376185 |  |
| 224390_s_at  | RGS8         | -1,399512875 | -0,855751026 | -0,54376185 |  |
| 235875_at    | -            | -1,399512875 | -0,855751026 | -0,54376185 |  |
| 237581_at    | -            | -1,399512875 | -0,855751026 | -0,54376185 |  |
| 217205_at    | -            | 1,05337236   | 1,59747851   | -0,54410615 |  |
| 242471_at    | SRGAP2P2     | 0,728550685  | 1,272721751  | -0,54417107 |  |
| 1569256_a_at | FAM43B       | -0,59053611  | -0,046302147 | -0,54423396 |  |
| 230189_x_at  | NELF         | -0,59053611  | -0,046302147 | -0,54423396 |  |
| 1554378_a_at | PDE1C        | -2,756478458 | -2,211750327 | -0,54472813 |  |
| 1555777_at   | POSTN        | -2,756478458 | -2,211750327 | -0,54472813 |  |
| 1560257_at   | -            | -2,756478458 | -2,211750327 | -0,54472813 |  |
| 1560797_s_at | LOC100507404 | -2,756478458 | -2,211750327 | -0,54472813 |  |
| 1561519_at   | -            | -2,756478458 | -2,211750327 | -0,54472813 |  |
| 1569978_x_at | -            | -2,756478458 | -2,211750327 | -0,54472813 |  |
| 210948_s_at  | LEF1         | -2,756478458 | -2,211750327 | -0,54472813 |  |
| 217565_at    | GRIA3        | -2,756478458 | -2,211750327 | -0,54472813 |  |
| 228681_x_at  | DAPK3        | -2,756478458 | -2,211750327 | -0,54472813 |  |
| 234410_at    | GABRR3       | -2,756478458 | -2,211750327 | -0,54472813 |  |
| 236815_at    | -            | -2,756478458 | -2,211750327 | -0,54472813 |  |
| 237015_at    | -            | -2,756478458 | -2,211750327 | -0,54472813 |  |
| 239971_at    | -            | -2,756478458 | -2,211750327 | -0,54472813 |  |
| 242254_at    | -            | -2,756478458 | -2,211750327 | -0,54472813 |  |
| 243175_at    | UTS2D        | -2,756478458 | -2,211750327 | -0,54472813 |  |
| 244346_at    | -            | -2,756478458 | -2,211750327 | -0,54472813 |  |
| 206360_s_at  | SOCS3        | -0,234278768 | 0,310717132  | -0,5449959  |  |
| 231018_at    | PALM3        | 0,376672223  | 0,921731975  | -0,54505975 |  |
| 204142_at    | ENOSF1       | 1,426552034  | 1,971855016  | -0,54530298 |  |
| 1561600_at   | -            | -3,5000184   | -2,954576755 | -0,54544164 |  |
| 1555020_a_at | ARHGAP20     | -0,741668563 | -0,19610998  | -0,54555858 |  |
| 205582_s_at  | GGT5         | -0,741668563 | -0,19610998  | -0,54555858 |  |
| 230322_at    | NFAM1        | -0,741668563 | -0,19610998  | -0,54555858 |  |
| 236284_at    | KIAA0146     | -0,741668563 | -0,19610998  | -0,54555858 |  |
| 242002_at    | NKAIN2       | -0,741668563 | -0,19610998  | -0,54555858 |  |
| 243523_at    | LOC100128644 | -0,741668563 | -0,19610998  | -0,54555858 |  |
| 221616_s_at  | TAF9B        | -0,112808516 | 0,433557298  | -0,54636581 |  |
| 244642_at    | -            | -0,112808516 | 0,433557298  | -0,54636581 |  |
| 217446_x_at  | -            | -0,467091869 | 0,079428135  | -0,54652    |  |
| 213739_at    | -            | -0,089689931 | 0,456918297  | -0,54660823 |  |
| 1554803_s_at | TRIM72       | -0,706943342 | -0,160136748 | -0,54680659 |  |
| 1557071_s_at | NUB1         | -0,706943342 | -0,160136748 | -0,54680659 |  |
| 201958_s_at  | PPP1R12B     | -0,706943342 | -0,160136748 | -0,54680659 |  |
| 210168_at    | C6           | -0,706943342 | -0,160136748 | -0,54680659 |  |
| 231387_at    | -            | -0,706943342 | -0,160136748 | -0,54680659 |  |
| 243705_at    | DDHD1        | -0,706943342 | -0,160136748 | -0,54680659 |  |
| 1556484_at   | LRRC52       | -0,43775896  | 0,109221392  | -0,54698035 |  |
| 1555676_s_at | GSX1         | -2,089474779 | -1,541908042 | -0,54756674 |  |
| 1562314_at   | -            | -2,089474779 | -1,541908042 | -0,54756674 |  |
| 1562550_at   | -            | -2,089474779 | -1,541908042 | -0,54756674 |  |
| 205699_at    | MAP2K6       | -2,089474779 | -1,541908042 | -0,54756674 |  |
| 210604_at    | GNAT2        | -2,089474779 | -1,541908042 | -0,54756674 |  |
| 211617_at    | ALDOAP2      | -2,089474779 | -1,541908042 | -0,54756674 |  |
| 215943_at    | KIAA1661     | -2,089474779 | -1,541908042 | -0,54756674 |  |
| 218814_s_at  | TMEM206      | -2,089474779 | -1,541908042 | -0,54756674 |  |

|              |                  |              |              |             |  |
|--------------|------------------|--------------|--------------|-------------|--|
| 230457_at    | TMEM242          | -2,089474779 | -1,541908042 | -0,54756674 |  |
| 231169_at    | TXLNA            | -2,089474779 | -1,541908042 | -0,54756674 |  |
| 232739_at    | SPIB             | -2,089474779 | -1,541908042 | -0,54756674 |  |
| 233234_at    | KCTD16           | -2,089474779 | -1,541908042 | -0,54756674 |  |
| 233973_at    | LYZL1            | -2,089474779 | -1,541908042 | -0,54756674 |  |
| 243222_at    | ALPK1            | -2,089474779 | -1,541908042 | -0,54756674 |  |
| 244005_at    | -                | -2,089474779 | -1,541908042 | -0,54756674 |  |
| 229466_at    | TRIM66           | 0,020670649  | 0,568365095  | -0,54769445 |  |
| 209083_at    | CORO1A           | 0,401366113  | 0,949447784  | -0,54808167 |  |
| 220391_at    | ZBTB3            | -0,83191556  | -0,283667828 | -0,54824773 |  |
| 238414_at    | -                | -0,83191556  | -0,283667828 | -0,54824773 |  |
| 240547_at    | -                | -0,83191556  | -0,283667828 | -0,54824773 |  |
| 229936_at    | GFRA3            | -0,325749314 | 0,222599095  | -0,54834841 |  |
| 1558720_at   | -                | -1,812418401 | -1,264005341 | -0,54841306 |  |
| 1559129_a_at | MIRLET7DHG       | -1,812418401 | -1,264005341 | -0,54841306 |  |
| 1560727_at   | HEATR4           | -1,812418401 | -1,264005341 | -0,54841306 |  |
| 205620_at    | F10              | -1,812418401 | -1,264005341 | -0,54841306 |  |
| 207111_at    | EMR1             | -1,812418401 | -1,264005341 | -0,54841306 |  |
| 211639_x_at  | IGH@ /// IGHA1 / | -1,812418401 | -1,264005341 | -0,54841306 |  |
| 229726_at    | GRAP             | -1,812418401 | -1,264005341 | -0,54841306 |  |
| 231465_at    | -                | -1,812418401 | -1,264005341 | -0,54841306 |  |
| 237140_x_at  | -                | -1,812418401 | -1,264005341 | -0,54841306 |  |
| 237175_at    | -                | -1,812418401 | -1,264005341 | -0,54841306 |  |
| 238231_at    | NFYC             | -1,812418401 | -1,264005341 | -0,54841306 |  |
| 236533_at    | ASAP1            | 2,497416546  | 3,045906378  | -0,54848983 |  |
| 218440_at    | MCCC1            | 1,880387527  | 2,428994491  | -0,54860696 |  |
| 204491_at    | PDE4D            | -0,299034815 | 0,249604176  | -0,54863899 |  |
| 1559244_at   | FMN2             | -2,712026959 | -2,162639771 | -0,54938719 |  |
| 1559792_at   | -                | -2,712026959 | -2,162639771 | -0,54938719 |  |
| 210917_at    | YES1             | -2,712026959 | -2,162639771 | -0,54938719 |  |
| 216103_at    | ACOT11           | -2,712026959 | -2,162639771 | -0,54938719 |  |
| 221397_at    | TAS2R10          | -2,712026959 | -2,162639771 | -0,54938719 |  |
| 222904_s_at  | TMC5             | -2,712026959 | -2,162639771 | -0,54938719 |  |
| 223782_s_at  | TINAG            | -2,712026959 | -2,162639771 | -0,54938719 |  |
| 229105_at    | GPR39            | -2,712026959 | -2,162639771 | -0,54938719 |  |
| 229912_at    | SDK1             | -2,712026959 | -2,162639771 | -0,54938719 |  |
| 236111_at    | -                | -2,712026959 | -2,162639771 | -0,54938719 |  |
| 240060_at    | -                | -2,712026959 | -2,162639771 | -0,54938719 |  |
| 1554942_a_at | KLHL14           | -0,196756757 | 0,352836757  | -0,54959351 |  |
| 1556051_a_at | BICD1            | -1,196375121 | -0,646746079 | -0,54962904 |  |
| 1569428_at   | WIBG             | -1,196375121 | -0,646746079 | -0,54962904 |  |
| 210295_at    | MAGEA10          | -1,196375121 | -0,646746079 | -0,54962904 |  |
| 217515_s_at  | CACNA1S          | -1,196375121 | -0,646746079 | -0,54962904 |  |
| 224070_at    | TAKR             | -1,196375121 | -0,646746079 | -0,54962904 |  |
| 230572_at    | WWC2-AS2         | -1,196375121 | -0,646746079 | -0,54962904 |  |
| 235704_at    | DAZAP2           | -1,196375121 | -0,646746079 | -0,54962904 |  |
| 238943_at    | FIBCD1           | -1,196375121 | -0,646746079 | -0,54962904 |  |
| 242469_at    | C11orf93         | -1,196375121 | -0,646746079 | -0,54962904 |  |
| 221294_at    | GPR21            | -0,57445847  | -0,024572586 | -0,54988588 |  |
| 1553971_a_at | GATS             | -0,543051993 | 0,007421914  | -0,55047391 |  |
| 1565812_at   | TRIM36           | -0,543051993 | 0,007421914  | -0,55047391 |  |
| 229941_at    | FAM166B          | -0,543051993 | 0,007421914  | -0,55047391 |  |
| 1552742_at   | KCNH8            | -3,054236653 | -2,503677622 | -0,55055903 |  |
| 1563541_at   | -                | -3,054236653 | -2,503677622 | -0,55055903 |  |
| 1564794_at   | -                | -3,054236653 | -2,503677622 | -0,55055903 |  |
| 216016_at    | NLRP3            | -3,054236653 | -2,503677622 | -0,55055903 |  |

|              |              |              |              |             |  |
|--------------|--------------|--------------|--------------|-------------|--|
| 241330_x_at  | -            | -3,054236653 | -2,503677622 | -0,55055903 |  |
| 243335_at    | P4HA1        | -3,054236653 | -2,503677622 | -0,55055903 |  |
| 219165_at    | PDLIM2       | -0,055687482 | 0,495031851  | -0,55071933 |  |
| 239483_at    | FLJ37035     | -0,055687482 | 0,495031851  | -0,55071933 |  |
| 240643_at    | TTBK1        | -0,055687482 | 0,495031851  | -0,55071933 |  |
| 1560915_at   | DPY19L1      | -3,287237186 | -2,735862426 | -0,55137476 |  |
| 1564097_at   | -            | -3,287237186 | -2,735862426 | -0,55137476 |  |
| 244434_at    | GPR82        | -3,287237186 | -2,735862426 | -0,55137476 |  |
| 203244_at    | PEX5         | 2,254767157  | 2,806245339  | -0,55147818 |  |
| 223422_s_at  | ARHGAP24     | 0,052199481  | 0,603679647  | -0,55148017 |  |
| 1566448_at   | CD6          | -0,423248115 | 0,128747141  | -0,55199526 |  |
| 236254_at    | VPS13B       | 0,57782909   | 1,129843209  | -0,55201412 |  |
| 1554371_at   | PKD1L2       | -1,089016378 | -0,536087151 | -0,55292923 |  |
| 1558324_a_at | TMEM72       | -1,089016378 | -0,536087151 | -0,55292923 |  |
| 211242_x_at  | KIR2DL4      | -1,089016378 | -0,536087151 | -0,55292923 |  |
| 227149_at    | TNRC6C       | -1,089016378 | -0,536087151 | -0,55292923 |  |
| 231528_at    | -            | -1,089016378 | -0,536087151 | -0,55292923 |  |
| 240590_at    | LOC348761    | -1,089016378 | -0,536087151 | -0,55292923 |  |
| 243821_at    | MRPS31       | -1,089016378 | -0,536087151 | -0,55292923 |  |
| 228611_s_at  | -            | 1,369290453  | 1,922365006  | -0,55307455 |  |
| 232773_at    | -            | -0,285837228 | 0,26733076   | -0,55316799 |  |
| 1567298_at   | OR13C4       | -0,259832361 | 0,293518836  | -0,5533512  |  |
| 1569421_at   | CLDN4        | -0,259832361 | 0,293518836  | -0,5533512  |  |
| 217410_at    | AGRN         | -0,259832361 | 0,293518836  | -0,5533512  |  |
| 236580_at    | -            | -0,259832361 | 0,293518836  | -0,5533512  |  |
| 237858_s_at  | MTUS2        | -0,259832361 | 0,293518836  | -0,5533512  |  |
| 235409_at    | MGA          | 1,46610492   | 2,019703483  | -0,55359856 |  |
| 1553351_at   | OTUD7A       | -1,2845686   | -0,730778808 | -0,55378979 |  |
| 214675_at    | NUP188       | -1,2845686   | -0,730778808 | -0,55378979 |  |
| 218678_at    | NES          | -1,2845686   | -0,730778808 | -0,55378979 |  |
| 231515_at    | -            | -1,2845686   | -0,730778808 | -0,55378979 |  |
| 235933_at    | FLJ32154     | -1,2845686   | -0,730778808 | -0,55378979 |  |
| 237187_at    | -            | -1,2845686   | -0,730778808 | -0,55378979 |  |
| 241516_at    | -            | -1,2845686   | -0,730778808 | -0,55378979 |  |
| 243480_at    | -            | -1,2845686   | -0,730778808 | -0,55378979 |  |
| 1556075_at   | -            | -0,655928373 | -0,102100538 | -0,55382784 |  |
| 220357_s_at  | SGK2         | -0,655928373 | -0,102100538 | -0,55382784 |  |
| 240988_x_at  | -            | -0,655928373 | -0,102100538 | -0,55382784 |  |
| 244801_at    | PSMB7        | -0,655928373 | -0,102100538 | -0,55382784 |  |
| 224254_x_at  | -            | 0,934330293  | 1,488344553  | -0,55401426 |  |
| 223138_s_at  | DHX36        | 2,048758794  | 2,603119255  | -0,55436046 |  |
| 219713_at    | SHPK         | 1,390002893  | 1,944570415  | -0,55456752 |  |
| 242197_x_at  | CD36         | 0,613492853  | 1,16809119   | -0,55459834 |  |
| 201392_s_at  | IGF2R        | 2,35929703   | 2,914267328  | -0,5549703  |  |
| 226691_at    | TNRC18       | 1,163336153  | 1,718396606  | -0,55506045 |  |
| 1556206_at   | LOC100652856 | 0,083054335  | 0,638150376  | -0,55509604 |  |
| 221866_at    | TFEB         | 0,083054335  | 0,638150376  | -0,55509604 |  |
| 233219_at    | -            | 0,083054335  | 0,638150376  | -0,55509604 |  |
| 241865_at    | -            | 0,083054335  | 0,638150376  | -0,55509604 |  |
| 230341_x_at  | ADAMTS10     | 0,181384709  | 0,73688026   | -0,55549555 |  |
| 217388_s_at  | KYNU         | 1,764611101  | 2,320681318  | -0,55607022 |  |
| 1559788_at   | -            | -2,64318869  | -2,086984744 | -0,55620395 |  |
| 1563794_s_at | IFT122       | -2,64318869  | -2,086984744 | -0,55620395 |  |
| 1564789_at   | -            | -2,64318869  | -2,086984744 | -0,55620395 |  |
| 202280_at    | -            | -2,64318869  | -2,086984744 | -0,55620395 |  |
| 210335_at    | RASSF9       | -2,64318869  | -2,086984744 | -0,55620395 |  |

|              |           |              |              |             |  |
|--------------|-----------|--------------|--------------|-------------|--|
| 211449_at    | MSH6      | -2,64318869  | -2,086984744 | -0,55620395 |  |
| 212477_at    | ACAP2     | -2,64318869  | -2,086984744 | -0,55620395 |  |
| 216158_at    | -         | -2,64318869  | -2,086984744 | -0,55620395 |  |
| 216178_x_at  | ITGB1     | -2,64318869  | -2,086984744 | -0,55620395 |  |
| 216188_at    | MYCNOS    | -2,64318869  | -2,086984744 | -0,55620395 |  |
| 225668_at    | FAM173B   | -2,64318869  | -2,086984744 | -0,55620395 |  |
| 229383_at    | 01.03.15  | -2,64318869  | -2,086984744 | -0,55620395 |  |
| 240254_at    | -         | -2,64318869  | -2,086984744 | -0,55620395 |  |
| 206842_at    | KCND1     | -0,496991414 | 0,059218869  | -0,55621028 |  |
| 227584_at    | NAV1      | -0,496991414 | 0,059218869  | -0,55621028 |  |
| 229749_at    | ANO4      | -0,496991414 | 0,059218869  | -0,55621028 |  |
| 234061_at    | -         | -0,496991414 | 0,059218869  | -0,55621028 |  |
| 243971_x_at  | LOC731789 | -0,496991414 | 0,059218869  | -0,55621028 |  |
| 1553318_at   | RIBC1     | -0,946847173 | -0,39061235  | -0,55623482 |  |
| 1553589_a_at | PDZK1IP1  | -0,946847173 | -0,39061235  | -0,55623482 |  |
| 1563497_at   | USP25     | -0,946847173 | -0,39061235  | -0,55623482 |  |
| 202310_s_at  | COL1A1    | -0,946847173 | -0,39061235  | -0,55623482 |  |
| 206933_s_at  | H6PD      | -0,946847173 | -0,39061235  | -0,55623482 |  |
| 220714_at    | PRDM14    | -0,946847173 | -0,39061235  | -0,55623482 |  |
| 235594_at    | -         | -0,946847173 | -0,39061235  | -0,55623482 |  |
| 1558273_a_at | -         | -1,888254346 | -1,332017329 | -0,55623702 |  |
| 1559925_s_at | -         | -1,888254346 | -1,332017329 | -0,55623702 |  |
| 1566032_at   | -         | -1,888254346 | -1,332017329 | -0,55623702 |  |
| 1566809_a_at | -         | -1,888254346 | -1,332017329 | -0,55623702 |  |
| 207263_x_at  | VEZT      | -1,888254346 | -1,332017329 | -0,55623702 |  |
| 209789_at    | CORO2B    | -1,888254346 | -1,332017329 | -0,55623702 |  |
| 222381_at    | -         | -1,888254346 | -1,332017329 | -0,55623702 |  |
| 229641_at    | CCBE1     | -1,888254346 | -1,332017329 | -0,55623702 |  |
| 237418_at    | -         | -1,888254346 | -1,332017329 | -0,55623702 |  |
| 239820_at    | -         | -1,888254346 | -1,332017329 | -0,55623702 |  |
| 240841_at    | INSM2     | -1,888254346 | -1,332017329 | -0,55623702 |  |
| 242238_at    | -         | -1,888254346 | -1,332017329 | -0,55623702 |  |
| 243107_at    | -         | -1,888254346 | -1,332017329 | -0,55623702 |  |
| 222371_at    | -         | 0,533835206  | 1,090553537  | -0,55671833 |  |
| 1553802_a_at | SOX3      | -1,047650486 | -0,490927335 | -0,55672315 |  |
| 1566835_at   | -         | -1,047650486 | -0,490927335 | -0,55672315 |  |
| 207468_s_at  | SFRP5     | -1,047650486 | -0,490927335 | -0,55672315 |  |
| 208297_s_at  | EVI5      | -1,047650486 | -0,490927335 | -0,55672315 |  |
| 211905_s_at  | ITGB4     | -1,047650486 | -0,490927335 | -0,55672315 |  |
| 220483_s_at  | RNF19A    | -1,047650486 | -0,490927335 | -0,55672315 |  |
| 235992_s_at  | CYB5RL    | -1,047650486 | -0,490927335 | -0,55672315 |  |
| 243893_at    | KCNC3     | -1,047650486 | -0,490927335 | -0,55672315 |  |
| 1556103_at   | -         | 1,269985355  | 1,826973888  | -0,55698853 |  |
| 210120_s_at  | RANBP3    | 0,702292136  | 1,259496994  | -0,55720486 |  |
| 1560033_at   | MCCC2     | -3,013665402 | -2,456406426 | -0,55725898 |  |
| 1560989_at   | -         | -3,013665402 | -2,456406426 | -0,55725898 |  |
| 1561322_at   | -         | -3,013665402 | -2,456406426 | -0,55725898 |  |
| 1562502_at   | -         | -3,013665402 | -2,456406426 | -0,55725898 |  |
| 1567333_at   | -         | -3,013665402 | -2,456406426 | -0,55725898 |  |
| 206615_s_at  | ADAM22    | -3,013665402 | -2,456406426 | -0,55725898 |  |
| 208548_at    | IFNA6     | -3,013665402 | -2,456406426 | -0,55725898 |  |
| 231301_at    | NUP54     | -3,013665402 | -2,456406426 | -0,55725898 |  |
| 210971_s_at  | ARNTL     | -0,352951799 | 0,204310755  | -0,55726255 |  |
| 243428_at    | KCNQ1OT1  | -0,352951799 | 0,204310755  | -0,55726255 |  |
| 243651_at    | CPEB3     | -0,352951799 | 0,204310755  | -0,55726255 |  |
| 205914_s_at  | GRIN1     | -0,926850548 | -0,369450449 | -0,5574001  |  |

|              |                |              |              |             |  |
|--------------|----------------|--------------|--------------|-------------|--|
| 228258_at    | TBC1D10C       | -0,221656139 | 0,336136178  | -0,55779232 |  |
| 228813_at    | HDAC4          | -0,221656139 | 0,336136178  | -0,55779232 |  |
| 1555359_at   | PIGQ           | -0,078265071 | 0,479907041  | -0,55817211 |  |
| 229168_at    | COL23A1        | -0,078265071 | 0,479907041  | -0,55817211 |  |
| 1554217_a_at | CCDC132        | 0,03125738   | 0,589657387  | -0,55840001 |  |
| 206729_at    | TNFRSF8        | -1,470833215 | -0,912331589 | -0,55850163 |  |
| 214343_s_at  | ATXN7L1        | -1,470833215 | -0,912331589 | -0,55850163 |  |
| 228199_at    | FAHD2B /// FAH | -1,470833215 | -0,912331589 | -0,55850163 |  |
| 232102_at    | METTL6         | -1,470833215 | -0,912331589 | -0,55850163 |  |
| 232372_at    | -              | -1,470833215 | -0,912331589 | -0,55850163 |  |
| 234891_at    | DKFZP547L112   | -1,470833215 | -0,912331589 | -0,55850163 |  |
| 236903_at    | -              | -1,470833215 | -0,912331589 | -0,55850163 |  |
| 243207_at    | -              | -1,470833215 | -0,912331589 | -0,55850163 |  |
| 1554455_at   | LINS           | 0,228146222  | 0,786897721  | -0,5587515  |  |
| 234318_x_at  | NDOR1          | 0,228146222  | 0,786897721  | -0,5587515  |  |
| 221004_s_at  | ITM2C          | 2,520143371  | 3,078904771  | -0,5587614  |  |
| 202358_s_at  | SNX19          | 0,317354302  | 0,876248481  | -0,55889418 |  |
| 238665_at    | ZNF865         | 0,317354302  | 0,876248481  | -0,55889418 |  |
| 1567219_at   | -              | 0,417596971  | 0,976641161  | -0,55904419 |  |
| 203524_s_at  | MPST           | 2,713311265  | 3,272369332  | -0,55905807 |  |
| 229831_at    | CNTN3          | -3,250025915 | -2,690860744 | -0,55916517 |  |
| 238727_at    | -              | -3,250025915 | -2,690860744 | -0,55916517 |  |
| 224772_at    | NAV1           | -1,71423189  | -1,154897679 | -0,55933421 |  |
| 230037_at    | CD8B           | -1,71423189  | -1,154897679 | -0,55933421 |  |
| 234490_at    | -              | -1,71423189  | -1,154897679 | -0,55933421 |  |
| 234905_at    | DKFZP434H168   | -1,71423189  | -1,154897679 | -0,55933421 |  |
| 238861_at    | SSBP2          | -1,71423189  | -1,154897679 | -0,55933421 |  |
| 239616_at    | REXO2          | -1,71423189  | -1,154897679 | -0,55933421 |  |
| 239953_at    | -              | -1,71423189  | -1,154897679 | -0,55933421 |  |
| 1552481_s_at | MAN1A2         | -1,173767127 | -0,614371577 | -0,55939555 |  |
| 1556823_s_at | -              | -1,173767127 | -0,614371577 | -0,55939555 |  |
| 1558113_at   | FAM78B         | -1,173767127 | -0,614371577 | -0,55939555 |  |
| 208578_at    | SCN10A         | -1,173767127 | -0,614371577 | -0,55939555 |  |
| 217042_at    | RDH11          | -1,173767127 | -0,614371577 | -0,55939555 |  |
| 217405_x_at  | GPLD1          | -1,173767127 | -0,614371577 | -0,55939555 |  |
| 220265_at    | GPR107         | -1,173767127 | -0,614371577 | -0,55939555 |  |
| 240284_x_at  | -              | -1,173767127 | -0,614371577 | -0,55939555 |  |
| 243659_at    | -              | -1,173767127 | -0,614371577 | -0,55939555 |  |
| 206267_s_at  | MATK           | 0,735041319  | 1,294497133  | -0,55945581 |  |
| 50400_at     | PAOX           | -2,426295479 | -1,866722491 | -0,55957299 |  |
| 1564202_at   | LOC100131756   | -2,597496523 | -2,037551727 | -0,5599448  |  |
| 217525_at    | OLFML1         | -2,597496523 | -2,037551727 | -0,5599448  |  |
| 220652_at    | KIF24          | -2,597496523 | -2,037551727 | -0,5599448  |  |
| 224084_at    | -              | -2,597496523 | -2,037551727 | -0,5599448  |  |
| 240719_at    | LOC100505536   | -2,597496523 | -2,037551727 | -0,5599448  |  |
| 244260_at    | -              | -2,597496523 | -2,037551727 | -0,5599448  |  |
| 1552856_at   | LINC00311      | -1,937711681 | -1,377419394 | -0,56029229 |  |
| 1555463_a_at | CHD6           | -1,937711681 | -1,377419394 | -0,56029229 |  |
| 1563874_at   | WDR72          | -1,937711681 | -1,377419394 | -0,56029229 |  |
| 1565784_at   | LOC100128262   | -1,937711681 | -1,377419394 | -0,56029229 |  |
| 1567023_at   | OR5AK4P        | -1,937711681 | -1,377419394 | -0,56029229 |  |
| 206381_at    | SCN2A          | -1,937711681 | -1,377419394 | -0,56029229 |  |
| 220565_at    | CCR10          | -1,937711681 | -1,377419394 | -0,56029229 |  |
| 228869_at    | SNX20          | -1,937711681 | -1,377419394 | -0,56029229 |  |
| 230878_s_at  | COG1           | -1,937711681 | -1,377419394 | -0,56029229 |  |
| 233223_at    | -              | -1,937711681 | -1,377419394 | -0,56029229 |  |



|              |                  |              |              |             |  |
|--------------|------------------|--------------|--------------|-------------|--|
| 234715_at    | GOLGA2P2Y /// C  | -1,937711681 | -1,377419394 | -0,56029229 |  |
| 237208_at    | WDR61            | -1,937711681 | -1,377419394 | -0,56029229 |  |
| 237964_at    | -                | -1,937711681 | -1,377419394 | -0,56029229 |  |
| 238239_at    | WDR27            | -1,937711681 | -1,377419394 | -0,56029229 |  |
| 242750_at    | MMAA             | -1,937711681 | -1,377419394 | -0,56029229 |  |
| 243235_at    | -                | -1,937711681 | -1,377419394 | -0,56029229 |  |
| 209192_x_at  | KAT5             | 1,903621061  | 2,464004877  | -0,56038382 |  |
| 204961_s_at  | NCF1 /// NCF1B   | -1,240169874 | -0,679763839 | -0,56040604 |  |
| 205861_at    | SPIB             | -1,240169874 | -0,679763839 | -0,56040604 |  |
| 211086_x_at  | NEK1             | -1,240169874 | -0,679763839 | -0,56040604 |  |
| 216738_at    | -                | -1,240169874 | -0,679763839 | -0,56040604 |  |
| 227780_s_at  | ECSCR            | -1,240169874 | -0,679763839 | -0,56040604 |  |
| 232337_at    | B3GNT7           | -1,240169874 | -0,679763839 | -0,56040604 |  |
| 236317_at    | -                | -1,240169874 | -0,679763839 | -0,56040604 |  |
| 240276_at    | -                | -1,240169874 | -0,679763839 | -0,56040604 |  |
| 243108_at    | RANBP9           | -1,240169874 | -0,679763839 | -0,56040604 |  |
| 218837_s_at  | UBE2D4           | 1,274448124  | 1,835911187  | -0,56146306 |  |
| 214059_at    | IFI44            | 0,503742507  | 1,065442793  | -0,56170029 |  |
| 205998_x_at  | CYP3A4           | 0,273439642  | 0,835239052  | -0,56179941 |  |
| 217931_at    | CNPY3            | 2,139623739  | 2,702564916  | -0,56294118 |  |
| 227890_at    | TMEM198          | 0,962260738  | 1,525647381  | -0,56338664 |  |
| 1558483_at   | LRRC27           | -0,759588698 | -0,19610998  | -0,56347872 |  |
| 222818_at    | OSBPL10          | -0,759588698 | -0,19610998  | -0,56347872 |  |
| 230106_at    | ZXDC             | -0,759588698 | -0,19610998  | -0,56347872 |  |
| 239576_at    | MTUS1            | -0,759588698 | -0,19610998  | -0,56347872 |  |
| 1558578_a_at | C7orf73 /// LOC1 | -2,972500237 | -2,408705138 | -0,5637951  |  |
| 1567664_at   | -                | -2,972500237 | -2,408705138 | -0,5637951  |  |
| 207775_at    | MGC4859          | -2,972500237 | -2,408705138 | -0,5637951  |  |
| 232268_at    | -                | -2,972500237 | -2,408705138 | -0,5637951  |  |
| 242385_at    | RORB             | -2,972500237 | -2,408705138 | -0,5637951  |  |
| 225043_at    | SLC15A4          | 0,613492853  | 1,177496821  | -0,56400397 |  |
| 1554593_s_at | SLC1A6           | 0,541261317  | 1,105412836  | -0,56415152 |  |
| 1557658_at   | -                | -1,131062212 | -0,566887459 | -0,56417475 |  |
| 206023_at    | NMU              | -1,131062212 | -0,566887459 | -0,56417475 |  |
| 208218_s_at  | ACVR1B           | -1,131062212 | -0,566887459 | -0,56417475 |  |
| 217342_x_at  | FLJ11292         | -1,131062212 | -0,566887459 | -0,56417475 |  |
| 236427_at    | -                | -1,131062212 | -0,566887459 | -0,56417475 |  |
| 242160_at    | -                | -1,131062212 | -0,566887459 | -0,56417475 |  |
| 241893_at    | -                | 0,46522187   | 1,029536893  | -0,56431502 |  |
| 223797_at    | PRO2852          | 0,384950573  | 0,949447784  | -0,56449721 |  |
| 1553268_at   | RHBDL3           | -1,026571149 | -0,461594427 | -0,56497672 |  |
| 207873_x_at  | SEZ6L            | -1,026571149 | -0,461594427 | -0,56497672 |  |
| 217636_at    | POLG             | -1,026571149 | -0,461594427 | -0,56497672 |  |
| 221222_s_at  | C1orf56          | -1,026571149 | -0,461594427 | -0,56497672 |  |
| 223903_at    | TLR9             | -1,026571149 | -0,461594427 | -0,56497672 |  |
| 230565_at    | ATP6V1G3         | -1,026571149 | -0,461594427 | -0,56497672 |  |
| 238620_at    | -                | -1,026571149 | -0,461594427 | -0,56497672 |  |
| 239641_at    | FLI1-AS1         | -1,026571149 | -0,461594427 | -0,56497672 |  |
| 1556818_at   | -                | -0,033456564 | 0,532164371  | -0,56562093 |  |
| 230619_at    | ARNT             | -0,033456564 | 0,532164371  | -0,56562093 |  |
| 1552304_at   | ALG10            | -0,888496123 | -0,322870281 | -0,56562584 |  |
| 1558854_a_at | -                | -0,888496123 | -0,322870281 | -0,56562584 |  |
| 1558960_a_at | -                | -0,888496123 | -0,322870281 | -0,56562584 |  |
| 201006_at    | PRDX2            | -0,888496123 | -0,322870281 | -0,56562584 |  |
| 243184_at    | -                | -0,888496123 | -0,322870281 | -0,56562584 |  |
| 1562861_at   | -                | -0,59053611  | -0,024572586 | -0,56596352 |  |

|              |                |              |              |             |  |
|--------------|----------------|--------------|--------------|-------------|--|
| 204687_at    | PARM1          | -0,59053611  | -0,024572586 | -0,56596352 |  |
| 242029_at    | -              | -0,148196756 | 0,417770464  | -0,56596722 |  |
| 231195_at    | KLRG2          | -0,172274514 | 0,393761504  | -0,56603602 |  |
| 1555682_at   | OTUB2          | -0,299034815 | 0,26733076   | -0,56636557 |  |
| 215662_at    | -              | -0,299034815 | 0,26733076   | -0,56636557 |  |
| 206296_x_at  | MAP4K1         | -0,43775896  | 0,128747141  | -0,5665061  |  |
| 228932_at    | -              | -0,43775896  | 0,128747141  | -0,5665061  |  |
| 227377_at    | IGF2BP1        | 2,361396186  | 2,928263672  | -0,56686749 |  |
| 236530_at    | HS1BP3         | -0,85085127  | -0,283667828 | -0,56718344 |  |
| 244753_at    | -              | 1,283332461  | 1,85068474   | -0,56735228 |  |
| 1552519_at   | ACVR1C         | -1,518072576 | -0,950686014 | -0,56738656 |  |
| 1553427_at   | ADAMTS15       | -1,518072576 | -0,950686014 | -0,56738656 |  |
| 1554681_a_at | MGC50722       | -1,518072576 | -0,950686014 | -0,56738656 |  |
| 1561639_at   | -              | -1,518072576 | -0,950686014 | -0,56738656 |  |
| 207589_at    | ADRA1B         | -1,518072576 | -0,950686014 | -0,56738656 |  |
| 215925_s_at  | CD72           | -1,518072576 | -0,950686014 | -0,56738656 |  |
| 220816_at    | LPAR3          | -1,518072576 | -0,950686014 | -0,56738656 |  |
| 237685_at    | LOC339760      | -1,518072576 | -0,950686014 | -0,56738656 |  |
| 1558452_at   | TMEM144        | -2,779459409 | -2,211750327 | -0,56770908 |  |
| 1558587_at   | -              | -2,779459409 | -2,211750327 | -0,56770908 |  |
| 1560909_x_at | -              | -2,779459409 | -2,211750327 | -0,56770908 |  |
| 1561658_at   | -              | -2,779459409 | -2,211750327 | -0,56770908 |  |
| 1566446_at   | -              | -2,779459409 | -2,211750327 | -0,56770908 |  |
| 1570465_at   | -              | -2,779459409 | -2,211750327 | -0,56770908 |  |
| 207811_at    | KRT12          | -2,779459409 | -2,211750327 | -0,56770908 |  |
| 226863_at    | FAM110C        | -2,779459409 | -2,211750327 | -0,56770908 |  |
| 228772_at    | HNMT           | -2,779459409 | -2,211750327 | -0,56770908 |  |
| 229380_at    | ILDR2          | -2,779459409 | -2,211750327 | -0,56770908 |  |
| 236943_at    | -              | -2,779459409 | -2,211750327 | -0,56770908 |  |
| 1552825_at   | ZNF396         | -2,479842156 | -1,912089812 | -0,56775234 |  |
| 1560716_at   | -              | -2,479842156 | -1,912089812 | -0,56775234 |  |
| 205892_s_at  | FABP1          | -2,479842156 | -1,912089812 | -0,56775234 |  |
| 214565_s_at  | SMR3A /// SMR3 | -2,479842156 | -1,912089812 | -0,56775234 |  |
| 216660_at    | MYO7B          | -2,479842156 | -1,912089812 | -0,56775234 |  |
| 218559_s_at  | MAFB           | -2,479842156 | -1,912089812 | -0,56775234 |  |
| 227290_at    | LOC100509498   | -2,479842156 | -1,912089812 | -0,56775234 |  |
| 240568_at    | -              | -2,479842156 | -1,912089812 | -0,56775234 |  |
| 241171_at    | -              | -2,479842156 | -1,912089812 | -0,56775234 |  |
| 241307_at    | -              | -2,479842156 | -1,912089812 | -0,56775234 |  |
| 243348_at    | -              | -2,479842156 | -1,912089812 | -0,56775234 |  |
| 1560456_at   | PLIN5          | -0,986356909 | -0,41858459  | -0,56777232 |  |
| 202885_s_at  | PPP2R1B        | -0,986356909 | -0,41858459  | -0,56777232 |  |
| 204987_at    | ITIH2          | -0,986356909 | -0,41858459  | -0,56777232 |  |
| 214971_s_at  | ST6GAL1        | -0,986356909 | -0,41858459  | -0,56777232 |  |
| 219835_at    | PRDM8          | -0,986356909 | -0,41858459  | -0,56777232 |  |
| 236024_at    | GPM6A          | -0,986356909 | -0,41858459  | -0,56777232 |  |
| 236846_at    | LOC284757      | -0,986356909 | -0,41858459  | -0,56777232 |  |
| 230847_at    | WRNIP1         | 0,747935635  | 1,315948728  | -0,56801309 |  |
| 1560469_at   | NR5A2          | -1,424023738 | -0,855751026 | -0,56827271 |  |
| 1560955_at   | -              | -1,424023738 | -0,855751026 | -0,56827271 |  |
| 205151_s_at  | TRIL           | -1,424023738 | -0,855751026 | -0,56827271 |  |
| 205840_x_at  | GH1            | -1,424023738 | -0,855751026 | -0,56827271 |  |
| 211573_x_at  | TGM2           | -1,424023738 | -0,855751026 | -0,56827271 |  |
| 213232_at    | KIAA1467       | -1,424023738 | -0,855751026 | -0,56827271 |  |
| 217143_s_at  | YME1L1         | -1,424023738 | -0,855751026 | -0,56827271 |  |
| 221374_at    | FGF16          | -1,424023738 | -0,855751026 | -0,56827271 |  |

|              |                |              |              |             |  |
|--------------|----------------|--------------|--------------|-------------|--|
| 230613_at    | GMEB1          | -1,424023738 | -0,855751026 | -0,56827271 |  |
| 233361_at    | ANKRD44        | -1,424023738 | -0,855751026 | -0,56827271 |  |
| 240248_at    | -              | -1,424023738 | -0,855751026 | -0,56827271 |  |
| 240403_at    | -              | -1,424023738 | -0,855751026 | -0,56827271 |  |
| 241073_at    | -              | -1,424023738 | -0,855751026 | -0,56827271 |  |
| 206467_x_at  | RTEL1-TNFRSF6  | 0,123193849  | 0,691645685  | -0,56845184 |  |
| 1552391_at   | C1orf65        | -2,063149277 | -1,494668682 | -0,5684806  |  |
| 1555995_a_at | -              | -2,063149277 | -1,494668682 | -0,5684806  |  |
| 1560241_at   | LOC100506559   | -2,063149277 | -1,494668682 | -0,5684806  |  |
| 1569034_a_at | LOC440864      | -2,063149277 | -1,494668682 | -0,5684806  |  |
| 206013_s_at  | ACTL6B         | -2,063149277 | -1,494668682 | -0,5684806  |  |
| 208562_s_at  | ABCC9          | -2,063149277 | -1,494668682 | -0,5684806  |  |
| 212657_s_at  | IL1RN          | -2,063149277 | -1,494668682 | -0,5684806  |  |
| 222891_s_at  | BCL11A         | -2,063149277 | -1,494668682 | -0,5684806  |  |
| 236226_at    | BTLA           | -2,063149277 | -1,494668682 | -0,5684806  |  |
| 237791_at    | -              | -2,063149277 | -1,494668682 | -0,5684806  |  |
| 239080_at    | -              | -2,063149277 | -1,494668682 | -0,5684806  |  |
| 239369_at    | LCN8           | -2,063149277 | -1,494668682 | -0,5684806  |  |
| 243848_at    | -              | -2,063149277 | -1,494668682 | -0,5684806  |  |
| 244436_at    | -              | -2,063149277 | -1,494668682 | -0,5684806  |  |
| 244693_at    | -              | -2,063149277 | -1,494668682 | -0,5684806  |  |
| 237783_at    | PLAC8L1        | 0,103263601  | 0,67181667   | -0,56855307 |  |
| 238774_at    | -              | 0,911589958  | 1,480766833  | -0,56917687 |  |
| 203674_at    | HELZ           | 1,442503549  | 2,011838132  | -0,56933458 |  |
| 221525_at    | ZMIZ2          | -0,112808516 | 0,456918297  | -0,56972681 |  |
| 222871_at    | KLHDC8A        | -0,112808516 | 0,456918297  | -0,56972681 |  |
| 1553150_at   | KDM1B          | -2,43257096  | -1,862647763 | -0,5699232  |  |
| 1556698_a_at | GPRIN3         | -2,43257096  | -1,862647763 | -0,5699232  |  |
| 1561134_at   | -              | -2,43257096  | -1,862647763 | -0,5699232  |  |
| 1562168_at   | -              | -2,43257096  | -1,862647763 | -0,5699232  |  |
| 1565152_at   | -              | -2,43257096  | -1,862647763 | -0,5699232  |  |
| 213832_at    | KCND3          | -2,43257096  | -1,862647763 | -0,5699232  |  |
| 215648_at    | -              | -2,43257096  | -1,862647763 | -0,5699232  |  |
| 230961_at    | -              | -2,43257096  | -1,862647763 | -0,5699232  |  |
| 237578_at    | -              | -2,43257096  | -1,862647763 | -0,5699232  |  |
| 1554565_x_at | SPPL3          | -0,706943342 | -0,136643983 | -0,57029936 |  |
| 1562462_at   | DNAH10         | -0,706943342 | -0,136643983 | -0,57029936 |  |
| 237846_at    | -              | -0,706943342 | -0,136643983 | -0,57029936 |  |
| 61297_at     | CASKIN2        | -0,234262911 | 0,336136183  | -0,57039909 |  |
| 207189_s_at  | ZZEF1          | -0,259832361 | 0,310717132  | -0,57054949 |  |
| 218931_at    | RAB17          | -0,67289328  | -0,102100538 | -0,57079274 |  |
| 219213_at    | JAM2           | -0,67289328  | -0,102100538 | -0,57079274 |  |
| 228646_at    | PPP1R1C        | -0,67289328  | -0,102100538 | -0,57079274 |  |
| 236151_at    | SRRM4          | -0,67289328  | -0,102100538 | -0,57079274 |  |
| 218638_s_at  | LOC100130872 / | -0,366776884 | 0,204310755  | -0,57108764 |  |
| 228180_at    | -              | -0,366776884 | 0,204310755  | -0,57108764 |  |
| 231157_at    | TTLL11         | -0,394749123 | 0,176436073  | -0,5711852  |  |
| 1556421_at   | LOC286189      | -3,192553003 | -2,621331989 | -0,57122101 |  |
| 210662_at    | KYNU           | -3,192553003 | -2,621331989 | -0,57122101 |  |
| 228492_at    | USP9Y          | -3,192553003 | -2,621331989 | -0,57122101 |  |
| 236738_at    | C3orf80        | -3,192553003 | -2,621331989 | -0,57122101 |  |
| 209395_at    | CHI3L1         | -3,07502285  | -2,503677622 | -0,57134523 |  |
| 232324_x_at  | -              | -3,07502285  | -2,503677622 | -0,57134523 |  |
| 241860_at    | -              | -3,07502285  | -2,503677622 | -0,57134523 |  |
| 203438_at    | STC2           | -0,543051993 | 0,028364014  | -0,57141601 |  |
| 217677_at    | PLEKHA2        | -0,543051993 | 0,028364014  | -0,57141601 |  |

|              |                  |              |              |             |  |
|--------------|------------------|--------------|--------------|-------------|--|
| 236336_at    | BOLA3-AS1        | -0,543051993 | 0,028364014  | -0,57141601 |  |
| 206778_at    | CRYBB2           | -0,512251684 | 0,059218869  | -0,57147055 |  |
| 221921_s_at  | CADM3            | -0,512251684 | 0,059218869  | -0,57147055 |  |
| 1565567_at   | -                | 0,152582607  | 0,724100169  | -0,57151756 |  |
| 1557685_at   | LOC100507117     | 0,133056859  | 0,704715219  | -0,57165836 |  |
| 203675_at    | NUCB2            | 3,396853889  | 3,968932193  | -0,5720783  |  |
| 215224_at    | SNORA21          | 0,052199481  | 0,624460759  | -0,57226128 |  |
| 1554714_at   | RELL1            | -2,359436556 | -1,787089803 | -0,57234675 |  |
| 1556487_a_at | C3orf15 /// LOC1 | -2,359436556 | -1,787089803 | -0,57234675 |  |
| 1556856_at   | -                | -2,359436556 | -1,787089803 | -0,57234675 |  |
| 1559235_a_at | SOX30            | -2,359436556 | -1,787089803 | -0,57234675 |  |
| 1559351_at   | -                | -2,359436556 | -1,787089803 | -0,57234675 |  |
| 1560522_at   | LOC201477        | -2,359436556 | -1,787089803 | -0,57234675 |  |
| 210730_s_at  | NPY2R            | -2,359436556 | -1,787089803 | -0,57234675 |  |
| 211625_s_at  | DRD3             | -2,359436556 | -1,787089803 | -0,57234675 |  |
| 237135_at    | -                | -2,359436556 | -1,787089803 | -0,57234675 |  |
| 241634_at    | -                | -2,359436556 | -1,787089803 | -0,57234675 |  |
| 241723_at    | IQGAP2           | -2,359436556 | -1,787089803 | -0,57234675 |  |
| 242611_at    | -                | -2,359436556 | -1,787089803 | -0,57234675 |  |
| 222629_at    | REV1             | 0,03125738   | 0,603679647  | -0,57242227 |  |
| 1555098_a_at | CACNB2           | -2,187914861 | -1,615132408 | -0,57278245 |  |
| 1555567_s_at | LMOD3            | -2,187914861 | -1,615132408 | -0,57278245 |  |
| 1555605_x_at | BAGE             | -2,187914861 | -1,615132408 | -0,57278245 |  |
| 205307_s_at  | KMO              | -2,187914861 | -1,615132408 | -0,57278245 |  |
| 210065_s_at  | UPK1B            | -2,187914861 | -1,615132408 | -0,57278245 |  |
| 222226_at    | SAA3P            | -2,187914861 | -1,615132408 | -0,57278245 |  |
| 227763_at    | LYPD6            | -2,187914861 | -1,615132408 | -0,57278245 |  |
| 233163_at    | -                | -2,187914861 | -1,615132408 | -0,57278245 |  |
| 241336_at    | -                | -2,187914861 | -1,615132408 | -0,57278245 |  |
| 242225_at    | -                | -2,187914861 | -1,615132408 | -0,57278245 |  |
| 206689_x_at  | KAT5             | 1,751865623  | 2,324919719  | -0,5730541  |  |
| 204683_at    | ICAM2            | -0,055687482 | 0,51742585   | -0,57311333 |  |
| 1554256_a_at | PCNXL2           | -2,311268652 | -1,738067356 | -0,5732013  |  |
| 1561002_at   | -                | -2,311268652 | -1,738067356 | -0,5732013  |  |
| 1570291_at   | CLDN10-AS1       | -2,311268652 | -1,738067356 | -0,5732013  |  |
| 217262_s_at  | CELSR1           | -2,311268652 | -1,738067356 | -0,5732013  |  |
| 230984_s_at  | -                | -2,311268652 | -1,738067356 | -0,5732013  |  |
| 232466_at    | CUL4A            | -2,311268652 | -1,738067356 | -0,5732013  |  |
| 239862_at    | -                | -2,311268652 | -1,738067356 | -0,5732013  |  |
| 240010_at    | -                | -2,311268652 | -1,738067356 | -0,5732013  |  |
| 241988_x_at  | -                | -2,311268652 | -1,738067356 | -0,5732013  |  |
| 243154_at    | -                | -2,311268652 | -1,738067356 | -0,5732013  |  |
| 1566903_at   | -                | -0,078265071 | 0,495031851  | -0,57329692 |  |
| 1558019_at   | -                | -2,236765673 | -1,663414495 | -0,57335118 |  |
| 204486_at    | KCNQ1OT1         | -2,236765673 | -1,663414495 | -0,57335118 |  |
| 221338_at    | LY6G6E           | -2,236765673 | -1,663414495 | -0,57335118 |  |
| 234334_s_at  | LAMB4            | -2,236765673 | -1,663414495 | -0,57335118 |  |
| 235556_at    | CREBRF           | -2,236765673 | -1,663414495 | -0,57335118 |  |
| 242661_x_at  | ALS2CR12         | -2,236765673 | -1,663414495 | -0,57335118 |  |
| 1552851_at   | ZSCAN4           | -2,908843709 | -2,335104118 | -0,57373959 |  |
| 215814_at    | DST              | -2,908843709 | -2,335104118 | -0,57373959 |  |
| 216286_at    | -                | -2,908843709 | -2,335104118 | -0,57373959 |  |
| 236642_at    | C5orf63          | -2,908843709 | -2,335104118 | -0,57373959 |  |
| 239747_s_at  | -                | -2,908843709 | -2,335104118 | -0,57373959 |  |
| 206061_s_at  | DICER1           | 2,107467633  | 2,681234383  | -0,57376675 |  |
| 220628_s_at  | SDK2             | -0,83191556  | -0,258114234 | -0,57380133 |  |

|              |                 |              |              |             |  |
|--------------|-----------------|--------------|--------------|-------------|--|
| 229805_at    | ZDHHC22         | -0,83191556  | -0,258114234 | -0,57380133 |  |
| 233376_at    | -               | -0,83191556  | -0,258114234 | -0,57380133 |  |
| 234814_at    | -               | -0,83191556  | -0,258114234 | -0,57380133 |  |
| 240760_at    | CDRT15          | -0,83191556  | -0,258114234 | -0,57380133 |  |
| 241314_at    | -               | -0,196756757 | 0,377530647  | -0,5742874  |  |
| 243819_at    | -               | 0,181384709  | 0,755840599  | -0,57445589 |  |
| 204661_at    | CD52            | -0,221656139 | 0,352836757  | -0,5744929  |  |
| 206514_s_at  | CYP4F2 /// CYP4 | -1,838812296 | -1,264005341 | -0,57480696 |  |
| 208597_at    | CNTF            | -1,838812296 | -1,264005341 | -0,57480696 |  |
| 231095_at    | LOC100507049    | -1,838812296 | -1,264005341 | -0,57480696 |  |
| 237190_at    | -               | -1,838812296 | -1,264005341 | -0,57480696 |  |
| 241105_at    | -               | -1,838812296 | -1,264005341 | -0,57480696 |  |
| 204536_s_at  | -               | -0,79540287  | -0,220592223 | -0,57481065 |  |
| 1558323_at   | TMEM72          | -1,688127507 | -1,112851844 | -0,57527566 |  |
| 1561572_at   | -               | -1,688127507 | -1,112851844 | -0,57527566 |  |
| 1563398_at   | -               | -1,688127507 | -1,112851844 | -0,57527566 |  |
| 1564778_at   | -               | -1,688127507 | -1,112851844 | -0,57527566 |  |
| 219674_s_at  | HDLBP           | -1,688127507 | -1,112851844 | -0,57527566 |  |
| 231692_at    | PIGG            | -1,688127507 | -1,112851844 | -0,57527566 |  |
| 232697_at    | LRFN2           | -1,688127507 | -1,112851844 | -0,57527566 |  |
| 234073_at    | SDK2            | -1,688127507 | -1,112851844 | -0,57527566 |  |
| 236014_at    | MKX             | -1,688127507 | -1,112851844 | -0,57527566 |  |
| 237679_at    | TRIM66          | -1,688127507 | -1,112851844 | -0,57527566 |  |
| 239554_at    | -               | -1,688127507 | -1,112851844 | -0,57527566 |  |
| 243016_at    | -               | -1,688127507 | -1,112851844 | -0,57527566 |  |
| 216102_at    | PHLDB1          | -0,325749314 | 0,249604176  | -0,57535349 |  |
| 244579_at    | -               | -0,325749314 | 0,249604176  | -0,57535349 |  |
| 1556412_at   | -               | 0,384950573  | 0,960386719  | -0,57543615 |  |
| 229858_at    | -               | 1,607231019  | 2,182705233  | -0,57547421 |  |
| 214682_at    | PKD1P1          | -0,352951799 | 0,222599095  | -0,57555089 |  |
| 230945_at    | -               | -0,352951799 | 0,222599095  | -0,57555089 |  |
| 1569202_x_at | -               | 1,283332461  | 1,859476797  | -0,57614434 |  |
| 227163_at    | GSTO2           | -0,467091869 | 0,109221392  | -0,57631326 |  |
| 230196_x_at  | ARHGAP23        | -0,467091869 | 0,109221392  | -0,57631326 |  |
| 234435_at    | -               | -0,467091869 | 0,109221392  | -0,57631326 |  |
| 207345_at    | FST             | -0,655928373 | -0,079522948 | -0,57640542 |  |
| 236806_at    | -               | -0,655928373 | -0,079522948 | -0,57640542 |  |
| 1555139_a_at | OTUD7B          | -0,496991414 | 0,079428135  | -0,57641955 |  |
| 1556188_a_at | ZNF555          | -0,496991414 | 0,079428135  | -0,57641955 |  |
| 241480_at    | RNF213          | -0,496991414 | 0,079428135  | -0,57641955 |  |
| 215834_x_at  | SCARB1          | -0,622910612 | -0,046302147 | -0,57660847 |  |
| 212315_s_at  | NUP210          | 0,228146222  | 0,805216064  | -0,57706984 |  |
| 211562_s_at  | LMOD1           | -0,926850548 | -0,34958478  | -0,57726577 |  |
| 211598_x_at  | VIPR2           | -0,926850548 | -0,34958478  | -0,57726577 |  |
| 230215_at    | SEC61A2         | -0,926850548 | -0,34958478  | -0,57726577 |  |
| 233726_at    | -               | -0,926850548 | -0,34958478  | -0,57726577 |  |
| 236042_at    | LOC100130219    | -0,926850548 | -0,34958478  | -0,57726577 |  |
| 237394_at    | -               | -0,926850548 | -0,34958478  | -0,57726577 |  |
| 1553348_a_at | NFX1            | 0,209623097  | 0,786897721  | -0,57727462 |  |
| 1569520_at   | -               | -1,308181863 | -0,730778808 | -0,57740305 |  |
| 206865_at    | HRK             | -1,308181863 | -0,730778808 | -0,57740305 |  |
| 210321_at    | GZMH            | -1,308181863 | -0,730778808 | -0,57740305 |  |
| 214412_at    | H2AFB1 /// H2AF | -1,308181863 | -0,730778808 | -0,57740305 |  |
| 234864_s_at  | TRPM6           | -1,308181863 | -0,730778808 | -0,57740305 |  |
| 242932_at    | -               | -1,308181863 | -0,730778808 | -0,57740305 |  |
| 1552885_a_at | NKX6-3          | 0,995078803  | 1,572742379  | -0,57766358 |  |

|              |              |              |              |             |  |
|--------------|--------------|--------------|--------------|-------------|--|
| 1568929_at   | LOC100128343 | 0,984222186  | 1,562009954  | -0,57778777 |  |
| 232486_at    | LRFN1        | 0,928678725  | 1,507116528  | -0,5784378  |  |
| 1555025_at   | TMEM26       | -3,15396682  | -2,575129729 | -0,57883709 |  |
| 238206_at    | RXFP1        | -3,15396682  | -2,575129729 | -0,57883709 |  |
| 244387_at    | -            | -3,15396682  | -2,575129729 | -0,57883709 |  |
| 231211_s_at  | YIF1B        | -0,29900727  | 0,280484563  | -0,57949183 |  |
| 1553401_at   | MRGPRX1      | -2,866296344 | -2,286583451 | -0,57971289 |  |
| 1553931_at   | OSTCP1       | -2,866296344 | -2,286583451 | -0,57971289 |  |
| 1560745_at   | -            | -2,866296344 | -2,286583451 | -0,57971289 |  |
| 238040_at    | -            | -2,866296344 | -2,286583451 | -0,57971289 |  |
| 240022_at    | ZC3H4        | -2,866296344 | -2,286583451 | -0,57971289 |  |
| 240865_at    | -            | -2,866296344 | -2,286583451 | -0,57971289 |  |
| 1562367_at   | C15orf54     | -2,667025278 | -2,086984744 | -0,58004053 |  |
| 1562541_at   | -            | -2,667025278 | -2,086984744 | -0,58004053 |  |
| 207663_x_at  | GAGE3        | -2,667025278 | -2,086984744 | -0,58004053 |  |
| 211912_at    | MERTK        | -2,667025278 | -2,086984744 | -0,58004053 |  |
| 214235_at    | CYP3A5       | -2,667025278 | -2,086984744 | -0,58004053 |  |
| 224103_at    | LOC100132661 | -2,667025278 | -2,086984744 | -0,58004053 |  |
| 233227_at    | KIAA1109     | -2,667025278 | -2,086984744 | -0,58004053 |  |
| 234700_s_at  | RNASE7       | -2,667025278 | -2,086984744 | -0,58004053 |  |
| 238300_s_at  | DAZAP2       | -2,667025278 | -2,086984744 | -0,58004053 |  |
| 241492_at    | -            | -2,667025278 | -2,086984744 | -0,58004053 |  |
| 1564029_at   | USP49        | -1,399512875 | -0,819238336 | -0,58027454 |  |
| 208036_at    | OPN1SW       | -1,399512875 | -0,819238336 | -0,58027454 |  |
| 216000_at    | -            | -1,399512875 | -0,819238336 | -0,58027454 |  |
| 223683_at    | ZMYND15      | -1,399512875 | -0,819238336 | -0,58027454 |  |
| 1564600_a_at | CCDC36       | -0,423248115 | 0,157549243  | -0,58079736 |  |
| 214763_at    | ACOT11       | -0,423248115 | 0,157549243  | -0,58079736 |  |
| 226828_s_at  | HEYL         | -0,423248115 | 0,157549243  | -0,58079736 |  |
| 226916_x_at  | DPP9         | 1,261018186  | 1,841838775  | -0,58082059 |  |
| 1555092_at   | VASH2        | -1,591296941 | -1,010192375 | -0,58110457 |  |
| 1559134_a_at | -            | -1,591296941 | -1,010192375 | -0,58110457 |  |
| 1566433_at   | PLD4         | -1,591296941 | -1,010192375 | -0,58110457 |  |
| 217121_at    | TNKS         | -1,591296941 | -1,010192375 | -0,58110457 |  |
| 226731_at    | ITGA1        | -1,591296941 | -1,010192375 | -0,58110457 |  |
| 229416_at    | CLPTM1L      | -1,591296941 | -1,010192375 | -0,58110457 |  |
| 229976_at    | MORN5        | -1,591296941 | -1,010192375 | -0,58110457 |  |
| 232494_at    | CYP8B1       | -1,591296941 | -1,010192375 | -0,58110457 |  |
| 233652_at    | -            | -1,591296941 | -1,010192375 | -0,58110457 |  |
| 239448_at    | -            | -1,591296941 | -1,010192375 | -0,58110457 |  |
| 240546_at    | LOC389043    | -1,591296941 | -1,010192375 | -0,58110457 |  |
| 228257_at    | ANKRD52      | 1,764611101  | 2,345926937  | -0,58131584 |  |
| 205025_at    | ZBTB48       | 1,326951551  | 1,908311039  | -0,58135949 |  |
| 1553872_at   | C17orf103    | -0,741668563 | -0,160136748 | -0,58153181 |  |
| 1560100_at   | DLX1         | -0,741668563 | -0,160136748 | -0,58153181 |  |
| 209936_at    | RBM5         | -0,741668563 | -0,160136748 | -0,58153181 |  |
| 237382_at    | GLT25D2      | -0,741668563 | -0,160136748 | -0,58153181 |  |
| 239823_at    | -            | -0,741668563 | -0,160136748 | -0,58153181 |  |
| 244312_at    | -            | -0,741668563 | -0,160136748 | -0,58153181 |  |
| 1563138_at   | -            | -0,148196756 | 0,433557298  | -0,58175405 |  |
| 203749_s_at  | RARA         | -0,148196756 | 0,433557298  | -0,58175405 |  |
| 1558976_x_at | FAM100A      | -0,57445847  | 0,007421914  | -0,58188038 |  |
| 239973_at    | -            | -0,57445847  | 0,007421914  | -0,58188038 |  |
| 1555627_s_at | C21orf67     | -1,196375121 | -0,614371577 | -0,58200354 |  |
| 1562783_at   | LOC100128840 | -1,196375121 | -0,614371577 | -0,58200354 |  |
| 213042_s_at  | ATP2A3       | -1,196375121 | -0,614371577 | -0,58200354 |  |

|              |                 |              |              |             |  |
|--------------|-----------------|--------------|--------------|-------------|--|
| 215403_at    | -               | -1,196375121 | -0,614371577 | -0,58200354 |  |
| 216270_at    | ILVBL           | -1,196375121 | -0,614371577 | -0,58200354 |  |
| 226076_s_at  | MBD6            | -1,196375121 | -0,614371577 | -0,58200354 |  |
| 243270_at    | FAM205A         | -1,196375121 | -0,614371577 | -0,58200354 |  |
| 223679_at    | CTNNB1          | 1,659347917  | 2,242180416  | -0,5828325  |  |
| 235576_at    | WDR27           | 0,020670649  | 0,603679647  | -0,583009   |  |
| 1559917_a_at | CBR3-AS1        | 0,417596971  | 1,000684521  | -0,58308755 |  |
| 204786_s_at  | IFNAR2          | 2,338135744  | 2,921282473  | -0,58314673 |  |
| 56748_at     | TRIM10          | -2,124183759 | -1,539954955 | -0,5842288  |  |
| 215222_x_at  | MACF1           | 2,109966786  | 2,694398145  | -0,58443136 |  |
| 234998_at    | RAB11A          | 0,496120222  | 1,080561626  | -0,5844414  |  |
| 204191_at    | IFNAR1          | 0,30867765   | 0,893473268  | -0,58479562 |  |
| 206954_at    | WT1-AS          | 0,30867765   | 0,893473268  | -0,58479562 |  |
| 204434_at    | SPATA2          | 1,373456798  | 1,958277216  | -0,58482042 |  |
| 227383_at    | LOC727820       | 0,606430281  | 1,191491281  | -0,585061   |  |
| 213442_x_at  | SPDEF           | 0,291166226  | 0,876248481  | -0,58508226 |  |
| 215116_s_at  | DNM1            | 0,592200562  | 1,177496821  | -0,58529626 |  |
| 230800_at    | ADCY4           | 0,072842263  | 0,658444279  | -0,58560202 |  |
| 205075_at    | SERPINF2        | -1,047650486 | -0,461594427 | -0,58605606 |  |
| 209436_at    | SPON1           | -1,047650486 | -0,461594427 | -0,58605606 |  |
| 215081_at    | KIAA1024        | -1,047650486 | -0,461594427 | -0,58605606 |  |
| 1553591_at   | BCRP3           | -1,964176657 | -1,377419394 | -0,58675726 |  |
| 1565816_at   | -               | -1,964176657 | -1,377419394 | -0,58675726 |  |
| 211401_s_at  | FGFR2           | -1,964176657 | -1,377419394 | -0,58675726 |  |
| 211896_s_at  | DCN             | -1,964176657 | -1,377419394 | -0,58675726 |  |
| 213069_at    | HEG1            | -1,964176657 | -1,377419394 | -0,58675726 |  |
| 214347_s_at  | DDC             | -1,964176657 | -1,377419394 | -0,58675726 |  |
| 216284_at    | -               | -1,964176657 | -1,377419394 | -0,58675726 |  |
| 220895_at    | USP29           | -1,964176657 | -1,377419394 | -0,58675726 |  |
| 234479_at    | PCDHB18         | -1,964176657 | -1,377419394 | -0,58675726 |  |
| 237480_at    | -               | -1,964176657 | -1,377419394 | -0,58675726 |  |
| 1563872_at   | LOC284395       | 0,181384709  | 0,768343791  | -0,58695908 |  |
| 1553047_at   | PIP4K2B         | -0,033456564 | 0,553993624  | -0,58745019 |  |
| 207487_at    | -               | -3,32387526  | -2,735862426 | -0,58801283 |  |
| 235306_at    | GIMAP8          | -3,32387526  | -2,735862426 | -0,58801283 |  |
| 1563271_at   | -               | -1,353583928 | -0,765504029 | -0,5880799  |  |
| 1569602_at   | KANK2           | -1,353583928 | -0,765504029 | -0,5880799  |  |
| 207271_x_at  | SPAG11B         | -1,353583928 | -0,765504029 | -0,5880799  |  |
| 234419_x_at  | IGHA1 /// IGHG1 | -1,353583928 | -0,765504029 | -0,5880799  |  |
| 241205_at    | -               | -1,353583928 | -0,765504029 | -0,5880799  |  |
| 233995_at    | -               | 0,103263601  | 0,691645685  | -0,58838208 |  |
| 226113_at    | ZNF436          | 0,97328325   | 1,562009954  | -0,5887267  |  |
| 1553844_a_at | C10orf67        | -1,639579028 | -1,050406615 | -0,58917241 |  |
| 1554906_a_at | MPHOSPH6        | -1,639579028 | -1,050406615 | -0,58917241 |  |
| 1561682_at   | -               | -1,639579028 | -1,050406615 | -0,58917241 |  |
| 1565734_at   | -               | -1,639579028 | -1,050406615 | -0,58917241 |  |
| 1569527_at   | -               | -1,639579028 | -1,050406615 | -0,58917241 |  |
| 210408_s_at  | CPNE6           | -1,639579028 | -1,050406615 | -0,58917241 |  |
| 210682_at    | LPO             | -1,639579028 | -1,050406615 | -0,58917241 |  |
| 219432_at    | EVC             | -1,639579028 | -1,050406615 | -0,58917241 |  |
| 224142_s_at  | TTY8 /// TTY8   | -1,639579028 | -1,050406615 | -0,58917241 |  |
| 229646_at    | SOBP            | -1,639579028 | -1,050406615 | -0,58917241 |  |
| 233267_at    | -               | -1,639579028 | -1,050406615 | -0,58917241 |  |
| 234500_at    | -               | -1,639579028 | -1,050406615 | -0,58917241 |  |
| 240290_at    | LOC100507109    | -1,639579028 | -1,050406615 | -0,58917241 |  |
| 1554580_a_at | WWP2            | -0,366776884 | 0,222599095  | -0,58937598 |  |

|              |                 |              |              |             |  |
|--------------|-----------------|--------------|--------------|-------------|--|
| 1557112_a_at | VPS53           | -0,366776884 | 0,222599095  | -0,58937598 |  |
| 243568_at    | -               | -0,366776884 | 0,222599095  | -0,58937598 |  |
| 244870_at    | TES             | -0,366776884 | 0,222599095  | -0,58937598 |  |
| 243772_at    | SDCCAG8         | 0,841135803  | 1,43051703   | -0,58938123 |  |
| 242492_at    | CLNS1A          | 0,359971644  | 0,949447784  | -0,58947614 |  |
| 1553025_at   | GPR126          | -2,551294263 | -1,961547147 | -0,58974712 |  |
| 1560499_at   | C14orf64        | -2,551294263 | -1,961547147 | -0,58974712 |  |
| 1562957_at   | -               | -2,551294263 | -1,961547147 | -0,58974712 |  |
| 1568821_at   | TTC23           | -2,551294263 | -1,961547147 | -0,58974712 |  |
| 1570048_at   | DNAJC24         | -2,551294263 | -1,961547147 | -0,58974712 |  |
| 206969_at    | KRT34 /// LOC10 | -2,551294263 | -1,961547147 | -0,58974712 |  |
| 217706_at    | -               | -2,551294263 | -1,961547147 | -0,58974712 |  |
| 219756_s_at  | POF1B           | -2,551294263 | -1,961547147 | -0,58974712 |  |
| 230101_at    | CXCL2           | -2,551294263 | -1,961547147 | -0,58974712 |  |
| 241157_at    | -               | -2,551294263 | -1,961547147 | -0,58974712 |  |
| 236379_at    | -               | 1,390002893  | 1,979940779  | -0,58993789 |  |
| 1561171_a_at | GOLGA6L1 /// G  | -0,172274514 | 0,417770464  | -0,59004498 |  |
| 231310_at    | -               | 2,305800198  | 2,895866687  | -0,59006649 |  |
| 1553998_at   | DMRTC1 /// DM   | -2,01371626  | -1,423348341 | -0,59036792 |  |
| 207085_x_at  | CSF2RA          | -2,01371626  | -1,423348341 | -0,59036792 |  |
| 234561_at    | SLC2A13         | -2,01371626  | -1,423348341 | -0,59036792 |  |
| 236238_at    | -               | -2,01371626  | -1,423348341 | -0,59036792 |  |
| 236216_at    | -               | -0,00073712  | 0,589657387  | -0,59039451 |  |
| 230524_at    | MPI             | -0,196756757 | 0,393761504  | -0,59051826 |  |
| 236752_at    | -               | -0,196756757 | 0,393761504  | -0,59051826 |  |
| 1560695_at   | QTRTD1          | -3,212234735 | -2,621331989 | -0,59090275 |  |
| 1561154_at   | -               | -3,212234735 | -2,621331989 | -0,59090275 |  |
| 240864_at    | -               | -3,212234735 | -2,621331989 | -0,59090275 |  |
| 212966_at    | HIC2            | 2,582657321  | 3,173599504  | -0,59094218 |  |
| 204122_at    | TYROBP          | 0,133056859  | 0,724100169  | -0,59104331 |  |
| 1552836_at   | ZNF619          | 0,273439642  | 0,864649967  | -0,59121033 |  |
| 1563340_at   | -               | -0,512251684 | 0,079428135  | -0,59167982 |  |
| 1556444_a_at | LOC100288310    | -1,812418401 | -1,220210588 | -0,59220781 |  |
| 206144_at    | MAGI1           | -1,812418401 | -1,220210588 | -0,59220781 |  |
| 208321_s_at  | CABP1           | -1,812418401 | -1,220210588 | -0,59220781 |  |
| 213443_at    | TRADD           | -1,812418401 | -1,220210588 | -0,59220781 |  |
| 216930_at    | HNF1A           | -1,812418401 | -1,220210588 | -0,59220781 |  |
| 220658_s_at  | ARNTL2          | -1,812418401 | -1,220210588 | -0,59220781 |  |
| 222549_at    | CLDN1           | -1,812418401 | -1,220210588 | -0,59220781 |  |
| 227460_at    | FAM208A         | -1,812418401 | -1,220210588 | -0,59220781 |  |
| 231936_at    | HOXC9           | -1,812418401 | -1,220210588 | -0,59220781 |  |
| 232422_at    | A2LD1           | -1,812418401 | -1,220210588 | -0,59220781 |  |
| 236992_at    | -               | -1,812418401 | -1,220210588 | -0,59220781 |  |
| 241378_at    | MIB2            | -1,812418401 | -1,220210588 | -0,59220781 |  |
| 232601_at    | -               | 0,798390451  | 1,390636111  | -0,59224566 |  |
| 240922_at    | -               | -3,482633686 | -2,89013181  | -0,59250188 |  |
| 1556029_s_at | NMNAT2          | -2,504600601 | -1,912089812 | -0,59251079 |  |
| 1559966_a_at | ZFX4-AS1        | -2,504600601 | -1,912089812 | -0,59251079 |  |
| 1562583_s_at | -               | -2,504600601 | -1,912089812 | -0,59251079 |  |
| 1565601_at   | -               | -2,504600601 | -1,912089812 | -0,59251079 |  |
| 1566852_at   | TRIM42          | -2,504600601 | -1,912089812 | -0,59251079 |  |
| 204475_at    | MMP1            | -2,504600601 | -1,912089812 | -0,59251079 |  |
| 214610_at    | CYP11B1         | -2,504600601 | -1,912089812 | -0,59251079 |  |
| 216994_s_at  | RUNX2           | -2,504600601 | -1,912089812 | -0,59251079 |  |
| 223749_at    | C1QTNF2         | -2,504600601 | -1,912089812 | -0,59251079 |  |
| 243468_at    | PATE1           | -2,504600601 | -1,912089812 | -0,59251079 |  |



|              |                 |              |              |             |  |
|--------------|-----------------|--------------|--------------|-------------|--|
| 243581_at    | -               | -2,504600601 | -1,912089812 | -0,59251079 |  |
| 213328_at    | NEK1            | -0,299034815 | 0,293518836  | -0,59255365 |  |
| 217630_at    | ANGEL2          | -0,299034815 | 0,293518836  | -0,59255365 |  |
| 228439_at    | BATF2           | -0,299034815 | 0,293518836  | -0,59255365 |  |
| 1557873_at   | -               | -1,543331864 | -0,950686014 | -0,59264585 |  |
| 1558002_at   | STRAP           | -1,543331864 | -0,950686014 | -0,59264585 |  |
| 1568764_x_at | LOC728613 /// P | -1,543331864 | -0,950686014 | -0,59264585 |  |
| 202327_s_at  | PKD1            | -1,543331864 | -0,950686014 | -0,59264585 |  |
| 206475_x_at  | CSH1            | -1,543331864 | -0,950686014 | -0,59264585 |  |
| 216757_at    | -               | -1,543331864 | -0,950686014 | -0,59264585 |  |
| 229060_at    | YPEL2           | -1,543331864 | -0,950686014 | -0,59264585 |  |
| 238495_at    | -               | -1,543331864 | -0,950686014 | -0,59264585 |  |
| 238522_at    | -               | -1,543331864 | -0,950686014 | -0,59264585 |  |
| 242712_x_at  | RGPD3 /// RGP   | -1,543331864 | -0,950686014 | -0,59264585 |  |
| 1562194_at   | -               | -0,112808516 | 0,479907041  | -0,59271556 |  |
| 239876_at    | -               | -0,85085127  | -0,258114234 | -0,59273704 |  |
| 241486_at    | -               | -0,325749314 | 0,26733076   | -0,59308007 |  |
| 1558556_at   | CAMK1           | -0,136301282 | 0,456918297  | -0,59321958 |  |
| 1557212_at   | FLJ33065        | -0,67289328  | -0,079522948 | -0,59337033 |  |
| 1565677_at   | -               | -0,67289328  | -0,079522948 | -0,59337033 |  |
| 237274_at    | LOC100505547    | -0,67289328  | -0,079522948 | -0,59337033 |  |
| 207269_at    | DEFA4           | -1,240169874 | -0,646746079 | -0,5934238  |  |
| 208119_s_at  | ZNF93           | -1,240169874 | -0,646746079 | -0,5934238  |  |
| 208131_s_at  | PTGIS           | -1,240169874 | -0,646746079 | -0,5934238  |  |
| 238492_at    | -               | -1,240169874 | -0,646746079 | -0,5934238  |  |
| 241633_x_at  | -               | -1,240169874 | -0,646746079 | -0,5934238  |  |
| 1553080_at   | CSN1S2AP        | -2,756478458 | -2,162639771 | -0,59383869 |  |
| 1553599_a_at | SYCP3           | -2,756478458 | -2,162639771 | -0,59383869 |  |
| 1560058_at   | LOC399900       | -2,756478458 | -2,162639771 | -0,59383869 |  |
| 1561489_at   | ARHGAP15        | -2,756478458 | -2,162639771 | -0,59383869 |  |
| 217497_at    | TYMP            | -2,756478458 | -2,162639771 | -0,59383869 |  |
| 219700_at    | PLXDC1          | -2,756478458 | -2,162639771 | -0,59383869 |  |
| 233105_at    | -               | -2,756478458 | -2,162639771 | -0,59383869 |  |
| 237405_at    | -               | -2,756478458 | -2,162639771 | -0,59383869 |  |
| 238461_at    | EIF4E3          | -2,756478458 | -2,162639771 | -0,59383869 |  |
| 240558_at    | -               | -2,756478458 | -2,162639771 | -0,59383869 |  |
| 241257_at    | -               | -2,756478458 | -2,162639771 | -0,59383869 |  |
| 1563166_at   | -               | -2,089474779 | -1,494668682 | -0,5948061  |  |
| 202674_s_at  | LMO7            | -2,089474779 | -1,494668682 | -0,5948061  |  |
| 208265_at    | C2orf83         | -2,089474779 | -1,494668682 | -0,5948061  |  |
| 208291_s_at  | TH              | -2,089474779 | -1,494668682 | -0,5948061  |  |
| 214977_at    | -               | -2,089474779 | -1,494668682 | -0,5948061  |  |
| 229309_at    | ADRB1           | -2,089474779 | -1,494668682 | -0,5948061  |  |
| 230109_at    | PDE7B           | -2,089474779 | -1,494668682 | -0,5948061  |  |
| 232820_s_at  | GTSF1L          | -2,089474779 | -1,494668682 | -0,5948061  |  |
| 237658_at    | -               | -2,089474779 | -1,494668682 | -0,5948061  |  |
| 240369_at    | TTC7A           | -2,089474779 | -1,494668682 | -0,5948061  |  |
| 241943_at    | C18orf61        | -2,089474779 | -1,494668682 | -0,5948061  |  |
| 242216_at    | -               | -2,089474779 | -1,494668682 | -0,5948061  |  |
| 242397_at    | -               | -2,089474779 | -1,494668682 | -0,5948061  |  |
| 243027_at    | IGSF5           | -2,089474779 | -1,494668682 | -0,5948061  |  |
| 243102_at    | -               | -2,089474779 | -1,494668682 | -0,5948061  |  |
| 244382_at    | -               | -2,089474779 | -1,494668682 | -0,5948061  |  |
| 244800_x_at  | -               | -2,089474779 | -1,494668682 | -0,5948061  |  |
| 223936_s_at  | FOXP1           | -1,131062212 | -0,536087151 | -0,59497506 |  |
| 227557_at    | SCARF2          | -1,131062212 | -0,536087151 | -0,59497506 |  |

|             |                   |              |              |             |  |
|-------------|-------------------|--------------|--------------|-------------|--|
| 228668_x_at | CCDC71L           | -1,131062212 | -0,536087151 | -0,59497506 |  |
| 233523_at   | BPIFB4            | -1,131062212 | -0,536087151 | -0,59497506 |  |
| 235710_at   | VPS53             | -1,131062212 | -0,536087151 | -0,59497506 |  |
| 235815_at   | TSHZ2             | -1,131062212 | -0,536087151 | -0,59497506 |  |
| 239276_at   | -                 | -1,131062212 | -0,536087151 | -0,59497506 |  |
| 240157_at   | -                 | -1,131062212 | -0,536087151 | -0,59497506 |  |
| 228624_at   | TMEM144           | -0,43775896  | 0,157549243  | -0,5953082  |  |
| 233057_at   | HSPB8             | -0,43775896  | 0,157549243  | -0,5953082  |  |
| 233843_at   | ZBTB12            | -0,43775896  | 0,157549243  | -0,5953082  |  |
| 1554813_at  | -                 | -2,930741289 | -2,335104118 | -0,59563717 |  |
| 237832_at   | -                 | -2,930741289 | -2,335104118 | -0,59563717 |  |
| 240802_at   | -                 | -2,930741289 | -2,335104118 | -0,59563717 |  |
| 244422_at   | -                 | -2,930741289 | -2,335104118 | -0,59563717 |  |
| 1558533_at  | KRBA2             | -0,078265071 | 0,51742585   | -0,59569092 |  |
| 243310_at   | -                 | -0,078265071 | 0,51742585   | -0,59569092 |  |
| 211914_x_at | NF1               | -0,986356909 | -0,39061235  | -0,59574456 |  |
| 227069_at   | CUX1              | -0,986356909 | -0,39061235  | -0,59574456 |  |
| 217033_x_at | NTRK3             | -0,467091869 | 0,128747141  | -0,59583901 |  |
| 243908_at   | -                 | -0,259832361 | 0,336136178  | -0,59596854 |  |
| 214769_at   | CLCN4             | 2,997346717  | 3,593688577  | -0,59634186 |  |
| 238234_at   | -                 | -3,287237186 | -2,690860744 | -0,59637644 |  |
| 244063_at   | BTN2A1            | -0,285837228 | 0,310717132  | -0,59655436 |  |
| 1555488_at  | -                 | -2,138804305 | -1,541908042 | -0,59689626 |  |
| 1559061_at  | CACNA1G-AS1       | -2,138804305 | -1,541908042 | -0,59689626 |  |
| 206051_at   | ELAVL4            | -2,138804305 | -1,541908042 | -0,59689626 |  |
| 206742_at   | FIGF /// PIR-FIGF | -2,138804305 | -1,541908042 | -0,59689626 |  |
| 217272_s_at | SERPINB13         | -2,138804305 | -1,541908042 | -0,59689626 |  |
| 217535_at   | FAM49B            | -2,138804305 | -1,541908042 | -0,59689626 |  |
| 224054_at   | -                 | -2,138804305 | -1,541908042 | -0,59689626 |  |
| 224339_s_at | ANGPTL1           | -2,138804305 | -1,541908042 | -0,59689626 |  |
| 228186_s_at | RSPO3             | -2,138804305 | -1,541908042 | -0,59689626 |  |
| 239470_at   | C15orf56          | -2,138804305 | -1,541908042 | -0,59689626 |  |
| 242413_at   | -                 | -2,138804305 | -1,541908042 | -0,59689626 |  |
| 243623_at   | SLC1A7            | -2,138804305 | -1,541908042 | -0,59689626 |  |
| 212451_at   | SECISBP2L         | -0,946847173 | -0,34958478  | -0,59726239 |  |
| 212841_s_at | PPFIBP2           | -0,946847173 | -0,34958478  | -0,59726239 |  |
| 214272_at   | CYLD              | -0,946847173 | -0,34958478  | -0,59726239 |  |
| 221351_at   | HTR1A             | -0,946847173 | -0,34958478  | -0,59726239 |  |
| 234182_at   | -                 | -0,946847173 | -0,34958478  | -0,59726239 |  |
| 239854_at   | SYCE3             | -0,946847173 | -0,34958478  | -0,59726239 |  |
| 1570006_at  | LOC400958         | -2,384869671 | -1,787089803 | -0,59777987 |  |
| 1570126_at  | -                 | -2,384869671 | -1,787089803 | -0,59777987 |  |
| 205912_at   | PNLIP             | -2,384869671 | -1,787089803 | -0,59777987 |  |
| 207773_x_at | CYP3A43           | -2,384869671 | -1,787089803 | -0,59777987 |  |
| 209915_s_at | NRXN1             | -2,384869671 | -1,787089803 | -0,59777987 |  |
| 210747_at   | HLA-DQB1          | -2,384869671 | -1,787089803 | -0,59777987 |  |
| 217675_at   | ZBTB7C            | -2,384869671 | -1,787089803 | -0,59777987 |  |
| 228017_s_at | NKAIN4            | -2,384869671 | -1,787089803 | -0,59777987 |  |
| 236718_at   | MYO10             | -2,384869671 | -1,787089803 | -0,59777987 |  |
| 241189_at   | -                 | -2,384869671 | -1,787089803 | -0,59777987 |  |
| 242498_x_at | -                 | -2,384869671 | -1,787089803 | -0,59777987 |  |
| 1565840_at  | -                 | -3,054236653 | -2,456406426 | -0,59783023 |  |
| 202800_at   | SLC1A3            | -0,59053611  | 0,007421914  | -0,59795802 |  |
| 215583_at   | TMEM63A           | -0,59053611  | 0,007421914  | -0,59795802 |  |
| 216832_at   | RUNX1T1           | -0,59053611  | 0,007421914  | -0,59795802 |  |
| 1559548_at  | ACVR2B            | -1,089016378 | -0,490927335 | -0,59808904 |  |

|              |                 |              |              |             |  |
|--------------|-----------------|--------------|--------------|-------------|--|
| 1560068_a_at | LOC729870       | -1,089016378 | -0,490927335 | -0,59808904 |  |
| 220096_at    | -               | -1,089016378 | -0,490927335 | -0,59808904 |  |
| 224805_s_at  | FAM219B         | -1,089016378 | -0,490927335 | -0,59808904 |  |
| 1559402_a_at | C1orf61         | -0,622910612 | -0,024572586 | -0,59833803 |  |
| 201188_s_at  | ITPR3           | -0,622910612 | -0,024572586 | -0,59833803 |  |
| 1552662_a_at | PCDHGB7         | -0,394749123 | 0,204310755  | -0,59905988 |  |
| 1555609_a_at | ZMAT3           | -0,394749123 | 0,204310755  | -0,59905988 |  |
| 230394_at    | TCP10L          | -0,394749123 | 0,204310755  | -0,59905988 |  |
| 201185_at    | HTRA1           | -0,79540287  | -0,19610998  | -0,59929289 |  |
| 230949_at    | SLC23A3         | -0,79540287  | -0,19610998  | -0,59929289 |  |
| 244123_at    | -               | -0,79540287  | -0,19610998  | -0,59929289 |  |
| 1553891_at   | KLF17           | -2,262747984 | -1,663414495 | -0,59933349 |  |
| 1556679_at   | -               | -2,262747984 | -1,663414495 | -0,59933349 |  |
| 1569205_at   | PRCP            | -2,262747984 | -1,663414495 | -0,59933349 |  |
| 1569782_at   | -               | -2,262747984 | -1,663414495 | -0,59933349 |  |
| 1570303_at   | -               | -2,262747984 | -1,663414495 | -0,59933349 |  |
| 209793_at    | GRIA1           | -2,262747984 | -1,663414495 | -0,59933349 |  |
| 213796_at    | SPRR1A          | -2,262747984 | -1,663414495 | -0,59933349 |  |
| 216544_at    | RBMV2FP         | -2,262747984 | -1,663414495 | -0,59933349 |  |
| 221412_at    | VN1R1           | -2,262747984 | -1,663414495 | -0,59933349 |  |
| 224539_s_at  | PCDHAC2         | -2,262747984 | -1,663414495 | -0,59933349 |  |
| 231107_at    | -               | -2,262747984 | -1,663414495 | -0,59933349 |  |
| 232329_at    | RANBP10         | -2,262747984 | -1,663414495 | -0,59933349 |  |
| 233444_at    | -               | -2,262747984 | -1,663414495 | -0,59933349 |  |
| 204765_at    | ARHGEF5         | -0,759588698 | -0,160136748 | -0,59945195 |  |
| 223074_s_at  | AIF1L           | -0,759588698 | -0,160136748 | -0,59945195 |  |
| 233983_at    | TGM6            | -0,759588698 | -0,160136748 | -0,59945195 |  |
| 238433_at    | SNX5            | -0,759588698 | -0,160136748 | -0,59945195 |  |
| 1559696_at   | -               | -0,423248115 | 0,176436073  | -0,59968419 |  |
| 240527_at    | -               | -0,423248115 | 0,176436073  | -0,59968419 |  |
| 210707_x_at  | DTX2P1-UPK3B    | 2,171078719  | 2,770953871  | -0,59987515 |  |
| 1556744_a_at | -               | 0,798390451  | 1,398700978  | -0,60031053 |  |
| 229750_at    | POU2F2          | 0,246434561  | 0,847075464  | -0,6006409  |  |
| 1561598_at   | -               | -1,71423189  | -1,112851844 | -0,60138005 |  |
| 1563453_at   | -               | -1,71423189  | -1,112851844 | -0,60138005 |  |
| 1569926_s_at | SLC34A3         | -1,71423189  | -1,112851844 | -0,60138005 |  |
| 207001_x_at  | TSC22D3         | -1,71423189  | -1,112851844 | -0,60138005 |  |
| 208602_x_at  | CD6             | -1,71423189  | -1,112851844 | -0,60138005 |  |
| 210940_s_at  | GRM1            | -1,71423189  | -1,112851844 | -0,60138005 |  |
| 220196_at    | MUC16           | -1,71423189  | -1,112851844 | -0,60138005 |  |
| 228359_at    | UBASH3B         | -1,71423189  | -1,112851844 | -0,60138005 |  |
| 236307_at    | -               | -1,71423189  | -1,112851844 | -0,60138005 |  |
| 239658_at    | -               | -1,71423189  | -1,112851844 | -0,60138005 |  |
| 243034_at    | -               | -1,71423189  | -1,112851844 | -0,60138005 |  |
| 244233_at    | -               | -1,71423189  | -1,112851844 | -0,60138005 |  |
| 220048_at    | EDAR            | 0,103263601  | 0,704715219  | -0,60145162 |  |
| 1553992_s_at | NBR2            | 0,503742507  | 1,105412836  | -0,60167033 |  |
| 213417_at    | TBX2            | -0,352951799 | 0,249604176  | -0,60255597 |  |
| 204670_x_at  | HLA-DRB1 /// HL | 0,273439642  | 0,876248481  | -0,60280884 |  |
| 1553385_at   | LOC84931        | -0,57445847  | 0,028364014  | -0,60282248 |  |
| 235208_at    | CCDC112         | -0,57445847  | 0,028364014  | -0,60282248 |  |
| 226123_at    | CHD7            | 1,894952274  | 2,498185745  | -0,60323347 |  |
| 232835_at    | -               | 1,011212064  | 1,614891062  | -0,603679   |  |
| 204253_s_at  | VDR             | 0,020670649  | 0,624460759  | -0,60379011 |  |
| 227089_at    | COG5            | 0,133056859  | 0,73688026   | -0,6038234  |  |
| 206573_at    | KCNQ3           | -0,926850548 | -0,322870281 | -0,60398027 |  |

|              |                 |              |              |             |  |
|--------------|-----------------|--------------|--------------|-------------|--|
| 207312_at    | PHKG1           | -0,926850548 | -0,322870281 | -0,60398027 |  |
| 224336_s_at  | DUSP16          | -0,926850548 | -0,322870281 | -0,60398027 |  |
| 209410_s_at  | GRB10           | 1,104397092  | 1,708698295  | -0,6043012  |  |
| 1557158_s_at | MLL3            | -1,424023738 | -0,819238336 | -0,6047854  |  |
| 1563477_at   | -               | -1,424023738 | -0,819238336 | -0,6047854  |  |
| 213769_at    | KSR1            | -1,424023738 | -0,819238336 | -0,6047854  |  |
| 216815_at    | -               | -1,424023738 | -0,819238336 | -0,6047854  |  |
| 220145_at    | MAP9            | -1,424023738 | -0,819238336 | -0,6047854  |  |
| 244464_at    | -               | -1,424023738 | -0,819238336 | -0,6047854  |  |
| 1562516_at   | WDR60           | -1,2845686   | -0,679763839 | -0,60480476 |  |
| 1570065_at   | -               | -1,2845686   | -0,679763839 | -0,60480476 |  |
| 216196_at    | HERC2P4 /// LOC | -1,2845686   | -0,679763839 | -0,60480476 |  |
| 219450_at    | C4orf19         | -1,2845686   | -0,679763839 | -0,60480476 |  |
| 232657_at    | -               | -1,2845686   | -0,679763839 | -0,60480476 |  |
| 237012_at    | -               | -1,2845686   | -0,679763839 | -0,60480476 |  |
| 237264_at    | -               | -1,2845686   | -0,679763839 | -0,60480476 |  |
| 237824_at    | -               | -1,2845686   | -0,679763839 | -0,60480476 |  |
| 237901_at    | -               | -1,2845686   | -0,679763839 | -0,60480476 |  |
| 243796_at    | -               | -1,2845686   | -0,679763839 | -0,60480476 |  |
| 1561518_at   | LOC283914       | -0,888496123 | -0,283667828 | -0,6048283  |  |
| 207642_at    | HCRT            | -0,888496123 | -0,283667828 | -0,6048283  |  |
| 230557_at    | XRRA1           | -0,888496123 | -0,283667828 | -0,6048283  |  |
| 233618_at    | -               | -0,888496123 | -0,283667828 | -0,6048283  |  |
| 234935_at    | NDOR1           | -0,888496123 | -0,283667828 | -0,6048283  |  |
| 244809_at    | -               | -0,888496123 | -0,283667828 | -0,6048283  |  |
| 220256_s_at  | OXCT2           | -0,706943342 | -0,102100538 | -0,6048428  |  |
| 241938_at    | QKI             | -0,706943342 | -0,102100538 | -0,6048428  |  |
| 212070_at    | GPR56           | 1,191926657  | 1,796776588  | -0,60484993 |  |
| 228310_at    | ENAH            | 0,20027154   | 0,805216064  | -0,60494452 |  |
| 205523_at    | HAPLN1          | -3,013665402 | -2,408705138 | -0,60496026 |  |
| 224272_at    | RACGAP1P        | -3,013665402 | -2,408705138 | -0,60496026 |  |
| 224545_at    | -               | -3,013665402 | -2,408705138 | -0,60496026 |  |
| 1556375_at   | -               | -0,741668563 | -0,136643983 | -0,60502458 |  |
| 226374_at    | CXADR           | -0,741668563 | -0,136643983 | -0,60502458 |  |
| 234011_at    | -               | -0,741668563 | -0,136643983 | -0,60502458 |  |
| 236862_at    | GOPC            | -0,741668563 | -0,136643983 | -0,60502458 |  |
| 1557215_at   | LOC100506433    | -2,64318869  | -2,037551727 | -0,60563696 |  |
| 1557877_s_at | LOC340094       | -2,64318869  | -2,037551727 | -0,60563696 |  |
| 1558803_at   | -               | -2,64318869  | -2,037551727 | -0,60563696 |  |
| 1562701_at   | -               | -2,64318869  | -2,037551727 | -0,60563696 |  |
| 1562943_at   | MACROD2-AS1     | -2,64318869  | -2,037551727 | -0,60563696 |  |
| 1563226_at   | SLC38A10        | -2,64318869  | -2,037551727 | -0,60563696 |  |
| 1566042_at   | -               | -2,64318869  | -2,037551727 | -0,60563696 |  |
| 1566979_at   | -               | -2,64318869  | -2,037551727 | -0,60563696 |  |
| 232502_at    | LOC100652735 /  | -2,64318869  | -2,037551727 | -0,60563696 |  |
| 232664_at    | FLJ12334        | -2,64318869  | -2,037551727 | -0,60563696 |  |
| 233594_at    | LOC100506025    | -2,64318869  | -2,037551727 | -0,60563696 |  |
| 236711_at    | ZIC4            | -2,64318869  | -2,037551727 | -0,60563696 |  |
| 236789_at    | -               | -2,64318869  | -2,037551727 | -0,60563696 |  |
| 239003_at    | -               | -2,64318869  | -2,037551727 | -0,60563696 |  |
| 241190_at    | -               | -2,64318869  | -2,037551727 | -0,60563696 |  |
| 1558310_s_at | LOC100132356    | -1,937711681 | -1,332017329 | -0,60569435 |  |
| 206428_s_at  | -               | -1,937711681 | -1,332017329 | -0,60569435 |  |
| 206731_at    | CNKSR2          | -1,937711681 | -1,332017329 | -0,60569435 |  |
| 206824_at    | CES1P1          | -1,937711681 | -1,332017329 | -0,60569435 |  |
| 216053_x_at  | FAM182A /// FAM | -1,937711681 | -1,332017329 | -0,60569435 |  |

|              |                |              |              |             |  |
|--------------|----------------|--------------|--------------|-------------|--|
| 217290_at    | -              | -1,937711681 | -1,332017329 | -0,60569435 |  |
| 224053_s_at  | SLC4A9         | -1,937711681 | -1,332017329 | -0,60569435 |  |
| 230666_at    | HOXA11-AS      | -1,937711681 | -1,332017329 | -0,60569435 |  |
| 234968_at    | DENND4C        | -1,937711681 | -1,332017329 | -0,60569435 |  |
| 237716_at    | -              | -1,937711681 | -1,332017329 | -0,60569435 |  |
| 239275_at    | FRMPD2 /// FRM | -1,937711681 | -1,332017329 | -0,60569435 |  |
| 239965_at    | -              | -1,937711681 | -1,332017329 | -0,60569435 |  |
| 1564960_at   | KRTAP7-1       | -1,518072576 | -0,912331589 | -0,60574099 |  |
| 200928_s_at  | RAB14          | -1,518072576 | -0,912331589 | -0,60574099 |  |
| 206755_at    | CYP2B6         | -1,518072576 | -0,912331589 | -0,60574099 |  |
| 214399_s_at  | KRT4           | -1,518072576 | -0,912331589 | -0,60574099 |  |
| 228807_at    | ASPA           | -1,518072576 | -0,912331589 | -0,60574099 |  |
| 229693_at    | TMEM220        | -1,518072576 | -0,912331589 | -0,60574099 |  |
| 233727_at    | -              | -1,518072576 | -0,912331589 | -0,60574099 |  |
| 227959_at    | -              | 0,67554678   | 1,281471383  | -0,6059246  |  |
| 205277_at    | PRDM2          | 0,052199481  | 0,658444279  | -0,6062448  |  |
| 217052_x_at  | -              | 0,792179257  | 1,398700978  | -0,60652172 |  |
| 1569374_at   | C3orf62        | -1,173767127 | -0,566887459 | -0,60687967 |  |
| 220737_at    | RPS6KA6        | -1,173767127 | -0,566887459 | -0,60687967 |  |
| 228294_s_at  | ZNF775         | -1,173767127 | -0,566887459 | -0,60687967 |  |
| 234372_at    | -              | -1,173767127 | -0,566887459 | -0,60687967 |  |
| 243470_at    | -              | -1,173767127 | -0,566887459 | -0,60687967 |  |
| 223658_at    | KCNK6          | 3,139900454  | 3,747642277  | -0,60774182 |  |
| 1555151_s_at | TDH            | -1,026571149 | -0,41858459  | -0,60798656 |  |
| 220548_at    | PKDREJ         | -1,026571149 | -0,41858459  | -0,60798656 |  |
| 239659_at    | -              | -1,026571149 | -0,41858459  | -0,60798656 |  |
| 1554850_at   | VWA5B2         | -1,763254337 | -1,154897679 | -0,60835666 |  |
| 202206_at    | ARL4C          | -1,763254337 | -1,154897679 | -0,60835666 |  |
| 211614_at    | ERVH-6         | -1,763254337 | -1,154897679 | -0,60835666 |  |
| 214592_s_at  | SNAPC5         | -1,763254337 | -1,154897679 | -0,60835666 |  |
| 221217_s_at  | RBFOX1         | -1,763254337 | -1,154897679 | -0,60835666 |  |
| 225746_at    | RAB11FIP4      | -1,763254337 | -1,154897679 | -0,60835666 |  |
| 227053_at    | PACSL1         | -1,763254337 | -1,154897679 | -0,60835666 |  |
| 234102_at    | RASL11B        | -1,763254337 | -1,154897679 | -0,60835666 |  |
| 234145_at    | -              | -1,763254337 | -1,154897679 | -0,60835666 |  |
| 240675_at    | -              | -1,763254337 | -1,154897679 | -0,60835666 |  |
| 244037_at    | LOC100507520   | -1,763254337 | -1,154897679 | -0,60835666 |  |
| 205328_at    | CLDN10         | 2,406821352  | 3,016072743  | -0,60925139 |  |
| 1553540_a_at | SLC29A2        | -0,655928373 | -0,046302147 | -0,60962623 |  |
| 210565_at    | GCGR           | -0,655928373 | -0,046302147 | -0,60962623 |  |
| 232176_at    | SLITRK6        | -0,655928373 | -0,046302147 | -0,60962623 |  |
| 233167_at    | SELO           | 0,627515113  | 1,23718272   | -0,60966761 |  |
| 206769_at    | TMSB4Y         | -0,299034815 | 0,310717132  | -0,60975195 |  |
| 1560369_at   | ANKH           | -2,443493416 | -1,83348824  | -0,61000518 |  |
| 218322_s_at  | ACSL5          | -0,078265071 | 0,532164371  | -0,61042944 |  |
| 242389_at    | LUC7L3         | 0,376672223  | 0,987376598  | -0,61070437 |  |
| 1558871_at   | -              | 2,771299138  | 3,382199319  | -0,61090018 |  |
| 242672_at    | -              | -3,114791413 | -2,503677622 | -0,61111379 |  |
| 243479_at    | -              | -3,114791413 | -2,503677622 | -0,61111379 |  |
| 208556_at    | GPR31          | -0,83191556  | -0,220592223 | -0,61132334 |  |
| 214485_at    | ODF1           | -0,83191556  | -0,220592223 | -0,61132334 |  |
| 220193_at    | SH3D21         | -0,83191556  | -0,220592223 | -0,61132334 |  |
| 1553561_at   | TAS2R50        | -2,823166348 | -2,211750327 | -0,61141602 |  |
| 1554375_a_at | NR1H4          | -2,823166348 | -2,211750327 | -0,61141602 |  |
| 1562817_at   | -              | -2,823166348 | -2,211750327 | -0,61141602 |  |
| 1563367_at   | MAPT-AS1       | -2,823166348 | -2,211750327 | -0,61141602 |  |

|              |                 |              |              |             |  |
|--------------|-----------------|--------------|--------------|-------------|--|
| 1563589_at   | LOC340184       | -2,823166348 | -2,211750327 | -0,61141602 |  |
| 209583_s_at  | CD200           | -2,823166348 | -2,211750327 | -0,61141602 |  |
| 216819_at    | -               | -2,823166348 | -2,211750327 | -0,61141602 |  |
| 229485_x_at  | SHISA3          | -2,823166348 | -2,211750327 | -0,61141602 |  |
| 233740_at    | -               | -2,823166348 | -2,211750327 | -0,61141602 |  |
| 234272_at    | -               | -2,823166348 | -2,211750327 | -0,61141602 |  |
| 244785_at    | -               | -2,823166348 | -2,211750327 | -0,61141602 |  |
| 207882_at    | -               | -0,234278768 | 0,377530647  | -0,61180941 |  |
| 229444_at    | LOC100131607    | -0,022466681 | 0,589657387  | -0,61212407 |  |
| 232264_at    | -               | -0,022466681 | 0,589657387  | -0,61212407 |  |
| 236722_at    | LOC100129380    | -0,022466681 | 0,589657387  | -0,61212407 |  |
| 222376_at    | -               | -0,259832361 | 0,352836757  | -0,61266912 |  |
| 210465_s_at  | SNAPC3          | 0,30867765   | 0,921731975  | -0,61305433 |  |
| 224727_at    | EMC10           | 0,57782909   | 1,191491281  | -0,61366219 |  |
| 219346_at    | LRFN3           | 0,123193849  | 0,73688026   | -0,61368641 |  |
| 226672_s_at  | HDAC10          | 0,123193849  | 0,73688026   | -0,61368641 |  |
| 1556151_at   | ITFG1           | 2,553576109  | 3,16771226   | -0,61413615 |  |
| 231205_at    | -               | 2,450859799  | 3,065035915  | -0,61417612 |  |
| 243467_at    | -               | -0,43775896  | 0,176436073  | -0,61419503 |  |
| 234341_x_at  | LOC91548        | 2,236584753  | 2,851017268  | -0,61443252 |  |
| 1556670_at   | LOC100505624    | -1,470833215 | -0,855751026 | -0,61508219 |  |
| 208154_at    | -               | -1,470833215 | -0,855751026 | -0,61508219 |  |
| 220491_at    | HAMP            | -1,470833215 | -0,855751026 | -0,61508219 |  |
| 221175_at    | C3orf36         | -1,470833215 | -0,855751026 | -0,61508219 |  |
| 231605_at    | -               | -1,470833215 | -0,855751026 | -0,61508219 |  |
| 232714_at    | -               | -1,470833215 | -0,855751026 | -0,61508219 |  |
| 238611_at    | -               | -1,470833215 | -0,855751026 | -0,61508219 |  |
| 239094_at    | LOC730961       | -1,470833215 | -0,855751026 | -0,61508219 |  |
| 240217_s_at  | -               | -1,470833215 | -0,855751026 | -0,61508219 |  |
| 242056_at    | TRIM45          | -0,221656139 | 0,393761504  | -0,61541764 |  |
| 1557370_s_at | MYCBP2          | 1,292162421  | 1,908311039  | -0,61614862 |  |
| 230442_at    | MTHFSD          | -0,136301282 | 0,479907041  | -0,61620832 |  |
| 207192_at    | DNASE1L2        | -0,366776884 | 0,249604176  | -0,61638106 |  |
| 1562927_at   | -               | -2,779459409 | -2,162639771 | -0,61681964 |  |
| 210004_at    | OLR1            | -2,779459409 | -2,162639771 | -0,61681964 |  |
| 215831_at    | -               | -2,779459409 | -2,162639771 | -0,61681964 |  |
| 232385_x_at  | -               | -2,779459409 | -2,162639771 | -0,61681964 |  |
| 239739_at    | SNX24           | -2,779459409 | -2,162639771 | -0,61681964 |  |
| 240075_at    | -               | -2,779459409 | -2,162639771 | -0,61681964 |  |
| 243872_at    | -               | -2,779459409 | -2,162639771 | -0,61681964 |  |
| 207180_s_at  | HTATIP2         | 0,882651021  | 1,499637023  | -0,616986   |  |
| 1552552_s_at | CLEC4C          | -2,479842156 | -1,862647763 | -0,61719439 |  |
| 1552929_at   | GRK7            | -2,479842156 | -1,862647763 | -0,61719439 |  |
| 1557706_at   | ZHX2            | -2,479842156 | -1,862647763 | -0,61719439 |  |
| 1558787_a_at | TSPAN3          | -2,479842156 | -1,862647763 | -0,61719439 |  |
| 1562313_at   | BCORP1          | -2,479842156 | -1,862647763 | -0,61719439 |  |
| 204942_s_at  | ALDH3B2         | -2,479842156 | -1,862647763 | -0,61719439 |  |
| 206497_at    | COA1            | -2,479842156 | -1,862647763 | -0,61719439 |  |
| 212671_s_at  | HLA-DQA1 /// HL | -2,479842156 | -1,862647763 | -0,61719439 |  |
| 228262_at    | MAP7D2          | -2,479842156 | -1,862647763 | -0,61719439 |  |
| 229051_at    | -               | -2,479842156 | -1,862647763 | -0,61719439 |  |
| 232152_at    | CEP57L1         | -2,479842156 | -1,862647763 | -0,61719439 |  |
| 234531_at    | -               | -2,479842156 | -1,862647763 | -0,61719439 |  |
| 242075_at    | -               | -2,479842156 | -1,862647763 | -0,61719439 |  |
| 218857_s_at  | ASRGL1          | 0,606430281  | 1,223626587  | -0,61719631 |  |
| 1563185_at   | -               | -3,192553003 | -2,575129729 | -0,61742327 |  |

|             |                  |              |              |             |  |
|-------------|------------------|--------------|--------------|-------------|--|
| 213266_at   | TUBGCP4          | 0,246434561  | 0,864649967  | -0,61821541 |  |
| 1556887_at  | NPHP3-AS1        | -1,838812296 | -1,220210588 | -0,61860171 |  |
| 203231_s_at | ATXN1            | -1,838812296 | -1,220210588 | -0,61860171 |  |
| 211903_s_at | MPL              | -1,838812296 | -1,220210588 | -0,61860171 |  |
| 224175_s_at | TRIM34 /// TRIM6 | -1,838812296 | -1,220210588 | -0,61860171 |  |
| 231813_s_at | COG1             | -1,838812296 | -1,220210588 | -0,61860171 |  |
| 233501_at   | -                | -1,838812296 | -1,220210588 | -0,61860171 |  |
| 239066_at   | LOC100506966     | -1,838812296 | -1,220210588 | -0,61860171 |  |
| 215392_at   | -                | -3,07502285  | -2,456406426 | -0,61861642 |  |
| 230260_s_at | -                | -3,07502285  | -2,456406426 | -0,61861642 |  |
| 219630_at   | PDZK1IP1         | -0,59053611  | 0,028364014  | -0,61890012 |  |
| 221176_x_at | -                | -0,59053611  | 0,028364014  | -0,61890012 |  |
| 227392_at   | NISCH            | -0,59053611  | 0,028364014  | -0,61890012 |  |
| 1557714_at  | CTBP1            | 0,052199481  | 0,67181667   | -0,61961719 |  |
| 225511_at   | GPRC5B           | 0,052199481  | 0,67181667   | -0,61961719 |  |
| 236458_at   | -                | 0,052199481  | 0,67181667   | -0,61961719 |  |
| 213250_at   | CCDC85B          | -0,352951799 | 0,26733076   | -0,62028256 |  |
| 225259_at   | RAB6B            | 0,255492549  | 0,876248481  | -0,62075593 |  |
| 1563841_at  | -                | -2,359436556 | -1,738067356 | -0,6213692  |  |
| 1564051_at  | -                | -2,359436556 | -1,738067356 | -0,6213692  |  |
| 1569126_at  | CCNC             | -2,359436556 | -1,738067356 | -0,6213692  |  |
| 205726_at   | DIAPH2           | -2,359436556 | -1,738067356 | -0,6213692  |  |
| 210040_at   | SLC12A5          | -2,359436556 | -1,738067356 | -0,6213692  |  |
| 214346_at   | C1QL1            | -2,359436556 | -1,738067356 | -0,6213692  |  |
| 217078_s_at | CD300A           | -2,359436556 | -1,738067356 | -0,6213692  |  |
| 219391_at   | BPNT1            | -2,359436556 | -1,738067356 | -0,6213692  |  |
| 219710_at   | SH3TC2           | -2,359436556 | -1,738067356 | -0,6213692  |  |
| 231483_at   | LOC100505985     | -2,359436556 | -1,738067356 | -0,6213692  |  |
| 233707_at   | -                | -2,359436556 | -1,738067356 | -0,6213692  |  |
| 237292_at   | DPYSL3           | -2,359436556 | -1,738067356 | -0,6213692  |  |
| 242345_at   | COL28A1          | -2,359436556 | -1,738067356 | -0,6213692  |  |
| 226407_at   | TPT1-AS1         | -0,512251684 | 0,109221392  | -0,62147308 |  |
| 229643_at   | LOC100287375     | -0,512251684 | 0,109221392  | -0,62147308 |  |
| 1557582_at  | BIN3             | 0,555999837  | 1,177496821  | -0,62149698 |  |
| 209315_at   | HBS1L            | 0,555999837  | 1,177496821  | -0,62149698 |  |
| 1558277_at  | ZNF740           | -2,236765673 | -1,615132408 | -0,62163327 |  |
| 210520_at   | FETUB            | -2,236765673 | -1,615132408 | -0,62163327 |  |
| 234651_at   | -                | -2,236765673 | -1,615132408 | -0,62163327 |  |
| 237869_at   | A2LD1            | -2,236765673 | -1,615132408 | -0,62163327 |  |
| 206390_x_at | PF4              | -0,285837228 | 0,336136178  | -0,62197341 |  |
| 209848_s_at | PMEL             | -0,285837228 | 0,336136178  | -0,62197341 |  |
| 1556365_at  | LY86-AS1         | -2,908843709 | -2,286583451 | -0,62226026 |  |
| 1556763_at  | -                | -2,908843709 | -2,286583451 | -0,62226026 |  |
| 1566597_at  | -                | -2,908843709 | -2,286583451 | -0,62226026 |  |
| 211428_at   | SERPINA1         | -2,908843709 | -2,286583451 | -0,62226026 |  |
| 219195_at   | PPARGC1A         | -2,908843709 | -2,286583451 | -0,62226026 |  |
| 204294_at   | AMT              | 0,417596971  | 1,039887232  | -0,62229026 |  |
| 1553544_at  | GPR101           | -0,543051993 | 0,079428135  | -0,62248013 |  |
| 206137_at   | RIMS2            | -0,543051993 | 0,079428135  | -0,62248013 |  |
| 1553552_at  | TAAR8            | -1,353583928 | -0,730778808 | -0,62280512 |  |
| 1553670_at  | INTS4            | -1,353583928 | -0,730778808 | -0,62280512 |  |
| 1570262_at  | -                | -1,353583928 | -0,730778808 | -0,62280512 |  |
| 207019_s_at | AKAP4            | -1,353583928 | -0,730778808 | -0,62280512 |  |
| 210294_at   | TAPBP            | -1,353583928 | -0,730778808 | -0,62280512 |  |
| 228747_at   | SEC61A2          | -1,353583928 | -0,730778808 | -0,62280512 |  |
| 236803_at   | LOC100506214     | -1,353583928 | -0,730778808 | -0,62280512 |  |

|              |                |              |              |             |  |
|--------------|----------------|--------------|--------------|-------------|--|
| 241503_at    | -              | -1,353583928 | -0,730778808 | -0,62280512 |  |
| 217723_x_at  | -              | 0,457392764  | 1,080561626  | -0,62316886 |  |
| 227390_at    | MEG3           | -0,946847173 | -0,322870281 | -0,62397689 |  |
| 233648_at    | -              | -0,946847173 | -0,322870281 | -0,62397689 |  |
| 1553740_a_at | IRAK2          | -1,888254346 | -1,264005341 | -0,62424901 |  |
| 1554285_at   | HAVCR2         | -1,888254346 | -1,264005341 | -0,62424901 |  |
| 1557465_at   | LINC00282      | -1,888254346 | -1,264005341 | -0,62424901 |  |
| 1557994_at   | TTN            | -1,888254346 | -1,264005341 | -0,62424901 |  |
| 203828_s_at  | IL32           | -1,888254346 | -1,264005341 | -0,62424901 |  |
| 210167_s_at  | TEF            | -1,888254346 | -1,264005341 | -0,62424901 |  |
| 230908_at    | TACR1          | -1,888254346 | -1,264005341 | -0,62424901 |  |
| 232729_at    | FBXO32         | -1,888254346 | -1,264005341 | -0,62424901 |  |
| 239530_at    | ADD2           | -1,888254346 | -1,264005341 | -0,62424901 |  |
| 240156_at    | -              | -1,888254346 | -1,264005341 | -0,62424901 |  |
| 242180_at    | TSPAN16        | -1,888254346 | -1,264005341 | -0,62424901 |  |
| 244218_at    | -              | -1,888254346 | -1,264005341 | -0,62424901 |  |
| 210629_x_at  | LST1           | 0,882651021  | 1,507116528  | -0,62446551 |  |
| 226621_at    | OSMR           | 0,480753764  | 1,105412836  | -0,62465907 |  |
| 1567853_at   | ZNF28          | -2,712026959 | -2,086984744 | -0,62504222 |  |
| 1568826_at   | LOC100507173   | -2,712026959 | -2,086984744 | -0,62504222 |  |
| 1570263_at   | -              | -2,712026959 | -2,086984744 | -0,62504222 |  |
| 231498_at    | -              | -2,712026959 | -2,086984744 | -0,62504222 |  |
| 231977_at    | GRID1          | -2,712026959 | -2,086984744 | -0,62504222 |  |
| 234390_x_at  | -              | -2,712026959 | -2,086984744 | -0,62504222 |  |
| 240138_at    | -              | -2,712026959 | -2,086984744 | -0,62504222 |  |
| 242130_at    | -              | -2,712026959 | -2,086984744 | -0,62504222 |  |
| 219271_at    | GALNT14        | 0,46522187   | 1,090553537  | -0,62533167 |  |
| 238753_at    | NCS1           | 0,209623097  | 0,835239052  | -0,62561596 |  |
| 234557_at    | -              | -0,496991414 | 0,128747141  | -0,62573855 |  |
| 237419_at    | -              | -0,496991414 | 0,128747141  | -0,62573855 |  |
| 207118_s_at  | MMP23A /// MMF | -1,240169874 | -0,614371577 | -0,6257983  |  |
| 230991_at    | LOC100653206   | -1,240169874 | -0,614371577 | -0,6257983  |  |
| 1558371_a_at | -              | -0,67289328  | -0,046302147 | -0,62659113 |  |
| 241053_at    | LOC730184      | -0,67289328  | -0,046302147 | -0,62659113 |  |
| 223390_at    | C9orf37        | 0,541261317  | 1,16809119   | -0,62682987 |  |
| 234669_x_at  | C11orf30       | -0,706943342 | -0,079522948 | -0,62742039 |  |
| 234736_at    | JPH3           | -0,706943342 | -0,079522948 | -0,62742039 |  |
| 238303_at    | -              | -1,089016378 | -0,461594427 | -0,62742195 |  |
| 1569448_at   | PGM2L1         | -0,234278768 | 0,393761504  | -0,62804027 |  |
| 239629_at    | CFLAR          | -0,234278768 | 0,393761504  | -0,62804027 |  |
| 229178_at    | PRTG           | 0,401366113  | 1,029536893  | -0,62817078 |  |
| 1554949_at   | LOC554174      | -1,308181863 | -0,679763839 | -0,62841802 |  |
| 210579_s_at  | TRIM10         | -1,308181863 | -0,679763839 | -0,62841802 |  |
| 221378_at    | CER1           | -1,308181863 | -0,679763839 | -0,62841802 |  |
| 238848_at    | OTUD4          | -1,308181863 | -0,679763839 | -0,62841802 |  |
| 241701_at    | ARHGAP21       | -1,308181863 | -0,679763839 | -0,62841802 |  |
| 234209_at    | -              | -3,250025915 | -2,621331989 | -0,62869393 |  |
| 1555994_at   | DIAPH3-AS1     | -1,047650486 | -0,41858459  | -0,6290659  |  |
| 207560_at    | SLC28A1        | -1,047650486 | -0,41858459  | -0,6290659  |  |
| 211534_x_at  | PTPRN2         | -1,047650486 | -0,41858459  | -0,6290659  |  |
| 220478_at    | APOL5          | -1,047650486 | -0,41858459  | -0,6290659  |  |
| 220715_at    | -              | -1,047650486 | -0,41858459  | -0,6290659  |  |
| 229734_at    | LOC283174      | -1,047650486 | -0,41858459  | -0,6290659  |  |
| 229783_at    | AKAP13         | -1,047650486 | -0,41858459  | -0,6290659  |  |
| 244694_at    | IGLON5         | -1,047650486 | -0,41858459  | -0,6290659  |  |
| 244721_at    | TP53INP1       | -0,172274514 | 0,456918297  | -0,62919281 |  |



|              |              |              |              |             |  |
|--------------|--------------|--------------|--------------|-------------|--|
| 203083_at    | THBS2        | -1,639579028 | -1,010192375 | -0,62938665 |  |
| 205032_at    | ITGA2        | -1,639579028 | -1,010192375 | -0,62938665 |  |
| 207400_at    | NPY5R        | -1,639579028 | -1,010192375 | -0,62938665 |  |
| 219779_at    | ZFHX4        | -1,639579028 | -1,010192375 | -0,62938665 |  |
| 220421_at    | BTNL8        | -1,639579028 | -1,010192375 | -0,62938665 |  |
| 222865_x_at  | TMEM204      | -1,639579028 | -1,010192375 | -0,62938665 |  |
| 229407_at    | SDK1         | -1,639579028 | -1,010192375 | -0,62938665 |  |
| 239310_at    | -            | -1,639579028 | -1,010192375 | -0,62938665 |  |
| 1561527_at   | -            | -2,667025278 | -2,037551727 | -0,62947355 |  |
| 222172_at    | NPAS3        | -2,667025278 | -2,037551727 | -0,62947355 |  |
| 224234_at    | -            | -2,667025278 | -2,037551727 | -0,62947355 |  |
| 234103_at    | KCNT2        | -2,667025278 | -2,037551727 | -0,62947355 |  |
| 234589_at    | TMEM106A     | -2,667025278 | -2,037551727 | -0,62947355 |  |
| 236882_at    | -            | -2,667025278 | -2,037551727 | -0,62947355 |  |
| 237537_at    | -            | -2,667025278 | -2,037551727 | -0,62947355 |  |
| 239118_at    | KCNA2        | -2,667025278 | -2,037551727 | -0,62947355 |  |
| 239692_at    | -            | -2,667025278 | -2,037551727 | -0,62947355 |  |
| 243994_at    | -            | -2,667025278 | -2,037551727 | -0,62947355 |  |
| 220209_at    | PYY2         | -1,196375121 | -0,566887459 | -0,62948766 |  |
| 236684_at    | RQCD1        | -1,196375121 | -0,566887459 | -0,62948766 |  |
| 243519_at    | UBE3C        | -1,196375121 | -0,566887459 | -0,62948766 |  |
| 242506_at    | -            | 0,425644434  | 1,055274826  | -0,62963039 |  |
| 202545_at    | PRKCD        | -0,85085127  | -0,220592223 | -0,63025905 |  |
| 210816_s_at  | CYB561       | -0,85085127  | -0,220592223 | -0,63025905 |  |
| 244126_at    | PEX11G       | -0,85085127  | -0,220592223 | -0,63025905 |  |
| 230203_at    | FLJ46875     | -0,196756757 | 0,433557298  | -0,63031406 |  |
| 1553831_at   | APOBEC3D     | -0,622910612 | 0,007421914  | -0,63033253 |  |
| 244431_at    | KLLN         | -0,622910612 | 0,007421914  | -0,63033253 |  |
| 1557757_at   | -            | -0,888496123 | -0,258114234 | -0,63038189 |  |
| 1569246_a_at | C8orf74      | -0,888496123 | -0,258114234 | -0,63038189 |  |
| 206825_at    | OXTR         | -0,888496123 | -0,258114234 | -0,63038189 |  |
| 206575_at    | CDKL5        | -1,543331864 | -0,912331589 | -0,63100028 |  |
| 207542_s_at  | AQP1         | -1,543331864 | -0,912331589 | -0,63100028 |  |
| 208140_s_at  | LRRC48       | -1,543331864 | -0,912331589 | -0,63100028 |  |
| 208153_s_at  | FAT2         | -1,543331864 | -0,912331589 | -0,63100028 |  |
| 210421_s_at  | SLC24A1      | -1,543331864 | -0,912331589 | -0,63100028 |  |
| 216572_at    | FOXL1        | -1,543331864 | -0,912331589 | -0,63100028 |  |
| 216784_at    | -            | -1,543331864 | -0,912331589 | -0,63100028 |  |
| 219331_s_at  | KLHDC8A      | -1,543331864 | -0,912331589 | -0,63100028 |  |
| 231545_at    | -            | -1,543331864 | -0,912331589 | -0,63100028 |  |
| 240511_at    | -            | -1,543331864 | -0,912331589 | -0,63100028 |  |
| 240561_at    | LOC100652838 | -1,543331864 | -0,912331589 | -0,63100028 |  |
| 243358_at    | IGF1R        | -1,543331864 | -0,912331589 | -0,63100028 |  |
| 1560409_at   | -            | -0,655928373 | -0,024572586 | -0,63135579 |  |
| 207568_at    | CHRNA6       | -0,655928373 | -0,024572586 | -0,63135579 |  |
| 215888_at    | PDS5B        | -0,655928373 | -0,024572586 | -0,63135579 |  |
| 234834_at    | -            | -0,655928373 | -0,024572586 | -0,63135579 |  |
| 1563348_at   | -            | -1,964176657 | -1,332017329 | -0,63215933 |  |
| 1564438_at   | -            | -1,964176657 | -1,332017329 | -0,63215933 |  |
| 1565073_at   | -            | -1,964176657 | -1,332017329 | -0,63215933 |  |
| 1566596_at   | -            | -1,964176657 | -1,332017329 | -0,63215933 |  |
| 1570165_at   | -            | -1,964176657 | -1,332017329 | -0,63215933 |  |
| 209596_at    | MXRA5        | -1,964176657 | -1,332017329 | -0,63215933 |  |
| 213597_s_at  | CTDSPL       | -1,964176657 | -1,332017329 | -0,63215933 |  |
| 214888_at    | CAPN2        | -1,964176657 | -1,332017329 | -0,63215933 |  |
| 215555_at    | -            | -1,964176657 | -1,332017329 | -0,63215933 |  |

|              |                 |              |              |             |  |
|--------------|-----------------|--------------|--------------|-------------|--|
| 216633_s_at  | PLCH1           | -1,964176657 | -1,332017329 | -0,63215933 |  |
| 232443_at    | LOC441052       | -1,964176657 | -1,332017329 | -0,63215933 |  |
| 237125_at    | -               | -1,964176657 | -1,332017329 | -0,63215933 |  |
| 237185_at    | -               | -1,964176657 | -1,332017329 | -0,63215933 |  |
| 243778_at    | -               | -1,964176657 | -1,332017329 | -0,63215933 |  |
| 240627_x_at  | MSANTD4         | -3,32387526  | -2,690860744 | -0,63301452 |  |
| 214638_s_at  | CCNT2           | -0,57445847  | 0,059218869  | -0,63367734 |  |
| 203069_at    | SV2A            | -1,399512875 | -0,765504029 | -0,63400885 |  |
| 205108_s_at  | APOB            | -1,399512875 | -0,765504029 | -0,63400885 |  |
| 211221_at    | TADA3           | -1,399512875 | -0,765504029 | -0,63400885 |  |
| 233466_at    | LOC100652861    | -1,399512875 | -0,765504029 | -0,63400885 |  |
| 239637_at    | RAB18           | -1,399512875 | -0,765504029 | -0,63400885 |  |
| 1554159_a_at | ZMYND11         | -0,299034815 | 0,336136178  | -0,63517099 |  |
| 214754_at    | TET3            | -0,299034815 | 0,336136178  | -0,63517099 |  |
| 1562962_at   | -               | -0,83191556  | -0,19610998  | -0,63580558 |  |
| 232210_at    | -               | -0,83191556  | -0,19610998  | -0,63580558 |  |
| 1565811_at   | -               | -2,597496523 | -1,961547147 | -0,63594938 |  |
| 1566703_at   | -               | -2,597496523 | -1,961547147 | -0,63594938 |  |
| 216414_at    | -               | -2,597496523 | -1,961547147 | -0,63594938 |  |
| 220609_at    | LOC202181       | -2,597496523 | -1,961547147 | -0,63594938 |  |
| 233184_at    | EPHA6           | -2,597496523 | -1,961547147 | -0,63594938 |  |
| 241672_at    | SERTM1          | -2,597496523 | -1,961547147 | -0,63594938 |  |
| 243542_at    | PREPL           | -2,597496523 | -1,961547147 | -0,63594938 |  |
| 211958_at    | IGFBP5          | -1,026571149 | -0,39061235  | -0,6359588  |  |
| 239590_x_at  | FAM95B1 /// LOC | -1,026571149 | -0,39061235  | -0,6359588  |  |
| 240937_at    | -               | -1,026571149 | -0,39061235  | -0,6359588  |  |
| 241580_at    | ZNF518B         | -1,026571149 | -0,39061235  | -0,6359588  |  |
| 1555379_at   | FAM159A         | -2,01371626  | -1,377419394 | -0,63629687 |  |
| 1558819_at   | -               | -2,01371626  | -1,377419394 | -0,63629687 |  |
| 214031_s_at  | KRT7            | -2,01371626  | -1,377419394 | -0,63629687 |  |
| 217250_s_at  | CHD5            | -2,01371626  | -1,377419394 | -0,63629687 |  |
| 220447_at    | HRH3            | -2,01371626  | -1,377419394 | -0,63629687 |  |
| 221424_s_at  | OR51E2          | -2,01371626  | -1,377419394 | -0,63629687 |  |
| 222827_s_at  | KBTBD10         | -2,01371626  | -1,377419394 | -0,63629687 |  |
| 233130_at    | -               | -2,01371626  | -1,377419394 | -0,63629687 |  |
| 237231_at    | -               | -2,01371626  | -1,377419394 | -0,63629687 |  |
| 241605_at    | TRUB1           | -2,01371626  | -1,377419394 | -0,63629687 |  |
| 215973_at    | HCG4B           | -0,986356909 | -0,34958478  | -0,63677213 |  |
| 220886_at    | GABRQ           | -0,986356909 | -0,34958478  | -0,63677213 |  |
| 229599_at    | LOC440335       | -0,986356909 | -0,34958478  | -0,63677213 |  |
| 226111_s_at  | ZNF385A         | 1,153678675  | 1,790660532  | -0,63698186 |  |
| 241777_x_at  | -               | -3,212234735 | -2,575129729 | -0,63710501 |  |
| 220352_x_at  | FLJ42627        | 0,888485433  | 1,525647381  | -0,63716195 |  |
| 1559028_at   | C21orf15        | -0,259832361 | 0,377530647  | -0,63736301 |  |
| 221379_at    | -               | -0,259832361 | 0,377530647  | -0,63736301 |  |
| 1564499_at   | -               | -2,972500237 | -2,335104118 | -0,63739612 |  |
| 1566288_at   | OR2M4           | -2,972500237 | -2,335104118 | -0,63739612 |  |
| 220550_at    | FBXO4           | -2,972500237 | -2,335104118 | -0,63739612 |  |
| 237992_at    | -               | -2,972500237 | -2,335104118 | -0,63739612 |  |
| 241981_at    | FAM20A          | -2,972500237 | -2,335104118 | -0,63739612 |  |
| 228755_at    | GIGYF1          | 0,209623097  | 0,847075464  | -0,63745237 |  |
| 1558523_at   | FAM184A         | -1,173767127 | -0,536087151 | -0,63767998 |  |
| 1563708_at   | SFXN5           | -1,173767127 | -0,536087151 | -0,63767998 |  |
| 1564883_a_at | TAS1R1          | -1,173767127 | -0,536087151 | -0,63767998 |  |
| 221639_x_at  | HNRNPU          | -1,173767127 | -0,536087151 | -0,63767998 |  |
| 238066_at    | RBP7            | -1,173767127 | -0,536087151 | -0,63767998 |  |

|              |              |              |              |             |  |
|--------------|--------------|--------------|--------------|-------------|--|
| 1556896_at   | LOC284751    | -1,688127507 | -1,050406615 | -0,63772089 |  |
| 1558052_at   | TMED4        | -1,688127507 | -1,050406615 | -0,63772089 |  |
| 1568593_a_at | NUDT16P1     | -1,688127507 | -1,050406615 | -0,63772089 |  |
| 205257_s_at  | AMPH         | -1,688127507 | -1,050406615 | -0,63772089 |  |
| 208509_s_at  | OR7A17       | -1,688127507 | -1,050406615 | -0,63772089 |  |
| 215896_at    | -            | -1,688127507 | -1,050406615 | -0,63772089 |  |
| 216714_at    | CCL13        | -1,688127507 | -1,050406615 | -0,63772089 |  |
| 220594_at    | OGT          | -1,688127507 | -1,050406615 | -0,63772089 |  |
| 229971_at    | GPR114       | -1,688127507 | -1,050406615 | -0,63772089 |  |
| 232393_at    | ZNF462       | -1,688127507 | -1,050406615 | -0,63772089 |  |
| 242870_at    | -            | -1,688127507 | -1,050406615 | -0,63772089 |  |
| 223911_at    | LOC440330    | 0,020670649  | 0,658444279  | -0,63777363 |  |
| 211472_at    | PLXNB2       | -1,2845686   | -0,646746079 | -0,63782252 |  |
| 221105_at    | -            | -1,2845686   | -0,646746079 | -0,63782252 |  |
| 234276_at    | -            | -1,2845686   | -0,646746079 | -0,63782252 |  |
| 240320_at    | C14orf164    | -1,2845686   | -0,646746079 | -0,63782252 |  |
| 239049_at    | -            | -0,00073712  | 0,638150376  | -0,6388875  |  |
| 242696_at    | -            | -0,00073712  | 0,638150376  | -0,6388875  |  |
| 1556942_at   | -            | -2,551294263 | -1,912089812 | -0,63920445 |  |
| 209582_s_at  | CD200        | -2,551294263 | -1,912089812 | -0,63920445 |  |
| 216132_at    | -            | -2,551294263 | -1,912089812 | -0,63920445 |  |
| 241789_at    | RBMS3        | -2,551294263 | -1,912089812 | -0,63920445 |  |
| 243970_at    | LOC100130642 | -2,551294263 | -1,912089812 | -0,63920445 |  |
| 214910_s_at  | APOM         | -0,221656139 | 0,417770464  | -0,6394266  |  |
| 232362_at    | CCDC18       | -0,221656139 | 0,417770464  | -0,6394266  |  |
| 219266_at    | ZNF350       | 0,052199481  | 0,691645685  | -0,6394462  |  |
| 220232_at    | SCD5         | -0,741668563 | -0,102100538 | -0,63956803 |  |
| 236830_at    | -            | -0,741668563 | -0,102100538 | -0,63956803 |  |
| 1556824_at   | -            | -2,063149277 | -1,423348341 | -0,63980094 |  |
| 1559683_at   | -            | -2,063149277 | -1,423348341 | -0,63980094 |  |
| 1570267_at   | -            | -2,063149277 | -1,423348341 | -0,63980094 |  |
| 214424_s_at  | ALDOB        | -2,063149277 | -1,423348341 | -0,63980094 |  |
| 214575_s_at  | AZU1         | -2,063149277 | -1,423348341 | -0,63980094 |  |
| 214872_at    | RIF1         | -2,063149277 | -1,423348341 | -0,63980094 |  |
| 217641_at    | GPR135       | -2,063149277 | -1,423348341 | -0,63980094 |  |
| 222446_s_at  | BACE2        | -2,063149277 | -1,423348341 | -0,63980094 |  |
| 223860_at    | -            | -2,063149277 | -1,423348341 | -0,63980094 |  |
| 229193_at    | LUC7L3       | -2,063149277 | -1,423348341 | -0,63980094 |  |
| 231748_at    | ULBP3        | -2,063149277 | -1,423348341 | -0,63980094 |  |
| 233290_at    | -            | -2,063149277 | -1,423348341 | -0,63980094 |  |
| 240149_at    | -            | -2,063149277 | -1,423348341 | -0,63980094 |  |
| 241745_at    | LOC100507557 | -2,063149277 | -1,423348341 | -0,63980094 |  |
| 1559022_at   | KIAA0494     | -1,131062212 | -0,490927335 | -0,64013488 |  |
| 1564334_at   | LINC00304    | -1,131062212 | -0,490927335 | -0,64013488 |  |
| 1564467_at   | FAM161A      | -1,131062212 | -0,490927335 | -0,64013488 |  |
| 205670_at    | GAL3ST1      | -1,131062212 | -0,490927335 | -0,64013488 |  |
| 242095_at    | FLJ45825     | -1,131062212 | -0,490927335 | -0,64013488 |  |
| 1553991_s_at | VSIG10       | -1,591296941 | -0,950686014 | -0,64061093 |  |
| 1554909_at   | CCDC36       | -1,591296941 | -0,950686014 | -0,64061093 |  |
| 219389_at    | SUSD4        | -1,591296941 | -0,950686014 | -0,64061093 |  |
| 220818_s_at  | TRPC4        | -1,591296941 | -0,950686014 | -0,64061093 |  |
| 222639_s_at  | PLBD1        | -1,591296941 | -0,950686014 | -0,64061093 |  |
| 224292_at    | TTY13        | -1,591296941 | -0,950686014 | -0,64061093 |  |
| 228317_at    | ZFAND5       | -1,591296941 | -0,950686014 | -0,64061093 |  |
| 231245_s_at  | -            | -1,591296941 | -0,950686014 | -0,64061093 |  |
| 231434_at    | LOC100505841 | -1,591296941 | -0,950686014 | -0,64061093 |  |

|              |                |              |              |             |  |
|--------------|----------------|--------------|--------------|-------------|--|
| 234141_s_at  | LOC286059      | -1,591296941 | -0,950686014 | -0,64061093 |  |
| 242017_at    | -              | -1,591296941 | -0,950686014 | -0,64061093 |  |
| 243534_at    | CC2D2B /// LOC | -1,591296941 | -0,950686014 | -0,64061093 |  |
| 244155_x_at  | TOR2A          | -1,591296941 | -0,950686014 | -0,64061093 |  |
| 225382_at    | ZNF275         | 0,359971644  | 1,000684521  | -0,64071288 |  |
| 204487_s_at  | KCNQ1          | 0,30867765   | 0,949447784  | -0,64077013 |  |
| 212811_x_at  | SLC1A4         | 0,30867765   | 0,949447784  | -0,64077013 |  |
| 220975_s_at  | C1QTNF1        | 0,30867765   | 0,949447784  | -0,64077013 |  |
| 211693_at    | IGHA1          | -0,512251684 | 0,128747141  | -0,64099883 |  |
| 204717_s_at  | SLC29A2        | 0,291166226  | 0,932882274  | -0,64171605 |  |
| 208499_s_at  | DNAJC3         | 0,728550685  | 1,370274469  | -0,64172378 |  |
| 1554459_s_at | CFHR3          | -2,504600601 | -1,862647763 | -0,64195284 |  |
| 1562309_s_at | LOC100506695 / | -2,504600601 | -1,862647763 | -0,64195284 |  |
| 1563224_at   | -              | -2,504600601 | -1,862647763 | -0,64195284 |  |
| 231314_at    | -              | -2,504600601 | -1,862647763 | -0,64195284 |  |
| 234867_at    | -              | -2,504600601 | -1,862647763 | -0,64195284 |  |
| 236710_at    | C1orf87        | -2,504600601 | -1,862647763 | -0,64195284 |  |
| 243667_at    | -              | -2,504600601 | -1,862647763 | -0,64195284 |  |
| 244636_at    | -              | -2,504600601 | -1,862647763 | -0,64195284 |  |
| 207486_x_at  | CHN2           | -0,43775896  | 0,204310755  | -0,64206972 |  |
| 239128_at    | TMEM221        | -0,43775896  | 0,204310755  | -0,64206972 |  |
| 1569935_at   | ZNF664         | 0,682279745  | 1,324440845  | -0,6421611  |  |
| 1552383_at   | FAM71A         | -0,926850548 | -0,283667828 | -0,64318272 |  |
| 231756_at    | ZP4            | -0,926850548 | -0,283667828 | -0,64318272 |  |
| 232381_s_at  | DNAH5          | -0,926850548 | -0,283667828 | -0,64318272 |  |
| 1561989_at   | -              | -0,148196756 | 0,495031851  | -0,64322861 |  |
| 218964_at    | ARID3B         | 1,40228911   | 2,045615873  | -0,64332676 |  |
| 203369_x_at  | PDLIM7         | -0,089689931 | 0,553993624  | -0,64368356 |  |
| 1554804_a_at | CLDN19         | 1,414471577  | 2,058399602  | -0,64392802 |  |
| 1555557_a_at | TNK2           | -2,138804305 | -1,494668682 | -0,64413562 |  |
| 1568827_at   | LOC401442      | -2,138804305 | -1,494668682 | -0,64413562 |  |
| 205200_at    | CLEC3B /// EXO | -2,138804305 | -1,494668682 | -0,64413562 |  |
| 208085_s_at  | ARHGAP6        | -2,138804305 | -1,494668682 | -0,64413562 |  |
| 214524_at    | GHRH           | -2,138804305 | -1,494668682 | -0,64413562 |  |
| 220976_s_at  | KRTAP1-1       | -2,138804305 | -1,494668682 | -0,64413562 |  |
| 221976_s_at  | HDGFRP3        | -2,138804305 | -1,494668682 | -0,64413562 |  |
| 231623_at    | TMEM174        | -2,138804305 | -1,494668682 | -0,64413562 |  |
| 233663_s_at  | CDH26          | -2,138804305 | -1,494668682 | -0,64413562 |  |
| 234635_at    | KRTAP4-1       | -2,138804305 | -1,494668682 | -0,64413562 |  |
| 234690_at    | -              | -2,138804305 | -1,494668682 | -0,64413562 |  |
| 238747_at    | CACNA1E        | -2,138804305 | -1,494668682 | -0,64413562 |  |
| 241051_at    | -              | -2,138804305 | -1,494668682 | -0,64413562 |  |
| 241165_at    | -              | -2,138804305 | -1,494668682 | -0,64413562 |  |
| 1559699_at   | -              | -2,930741289 | -2,286583451 | -0,64415784 |  |
| 237928_at    | -              | -2,930741289 | -2,286583451 | -0,64415784 |  |
| 242477_at    | TTC39B         | -2,930741289 | -2,286583451 | -0,64415784 |  |
| 1556937_at   | -              | -0,394749123 | 0,249604176  | -0,6443533  |  |
| 203508_at    | TNFRSF1B       | 1,426552034  | 2,071071048  | -0,64451901 |  |
| 242704_at    | ZNF821         | 0,123193849  | 0,768343791  | -0,64514994 |  |
| 1565701_at   | -              | 0,171847695  | 0,817300337  | -0,64545264 |  |
| 1553601_a_at | TMIE           | -2,43257096  | -1,787089803 | -0,64548116 |  |
| 1557223_at   | RBPM5          | -2,43257096  | -1,787089803 | -0,64548116 |  |
| 1560095_s_at | -              | -2,43257096  | -1,787089803 | -0,64548116 |  |
| 211570_s_at  | RAPSN          | -2,43257096  | -1,787089803 | -0,64548116 |  |
| 216566_at    | CKAP2          | -2,43257096  | -1,787089803 | -0,64548116 |  |
| 234375_x_at  | -              | -2,43257096  | -1,787089803 | -0,64548116 |  |

|              |                 |              |              |             |  |
|--------------|-----------------|--------------|--------------|-------------|--|
| 236005_at    | -               | -2,43257096  | -1,787089803 | -0,64548116 |  |
| 240334_at    | -               | -2,43257096  | -1,787089803 | -0,64548116 |  |
| 244300_at    | -               | -2,43257096  | -1,787089803 | -0,64548116 |  |
| 1566995_at   | -               | -3,054236653 | -2,408705138 | -0,64553152 |  |
| 1553186_x_at | RASEF           | 0,57782909   | 1,223626587  | -0,6457975  |  |
| 1567558_at   | TREML4          | -2,187914861 | -1,541908042 | -0,64600682 |  |
| 203949_at    | MPO             | -2,187914861 | -1,541908042 | -0,64600682 |  |
| 214921_at    | KCNMA1          | -2,187914861 | -1,541908042 | -0,64600682 |  |
| 220619_at    | CHD7            | -2,187914861 | -1,541908042 | -0,64600682 |  |
| 231747_at    | CYSLTR1         | -2,187914861 | -1,541908042 | -0,64600682 |  |
| 234101_at    | -               | -2,187914861 | -1,541908042 | -0,64600682 |  |
| 234899_at    | H2BFM           | -2,187914861 | -1,541908042 | -0,64600682 |  |
| 236013_at    | CACNA1E         | -2,187914861 | -1,541908042 | -0,64600682 |  |
| 237569_at    | -               | -2,187914861 | -1,541908042 | -0,64600682 |  |
| 237907_at    | -               | -2,187914861 | -1,541908042 | -0,64600682 |  |
| 240127_at    | -               | -2,187914861 | -1,541908042 | -0,64600682 |  |
| 244630_at    | PDPK1           | -2,187914861 | -1,541908042 | -0,64600682 |  |
| 1559682_at   | -               | 0,822971223  | 1,469325098  | -0,64635387 |  |
| 215584_at    | HECW1           | -0,352951799 | 0,293518836  | -0,64647063 |  |
| 223323_x_at  | TRPM7           | -0,352951799 | 0,293518836  | -0,64647063 |  |
| 227281_at    | SLC29A4         | -0,352951799 | 0,293518836  | -0,64647063 |  |
| 1567284_at   | OR1J4           | -2,384869671 | -1,738067356 | -0,64680232 |  |
| 205858_at    | NGFR            | -2,384869671 | -1,738067356 | -0,64680232 |  |
| 220422_at    | UBQLN3          | -2,384869671 | -1,738067356 | -0,64680232 |  |
| 233063_s_at  | -               | -2,384869671 | -1,738067356 | -0,64680232 |  |
| 233797_s_at  | CST11           | -2,384869671 | -1,738067356 | -0,64680232 |  |
| 236519_at    | C9orf135        | -2,384869671 | -1,738067356 | -0,64680232 |  |
| 239436_at    | CHORDC1         | -2,384869671 | -1,738067356 | -0,64680232 |  |
| 239573_at    | -               | -2,384869671 | -1,738067356 | -0,64680232 |  |
| 202820_at    | AHR             | 0,246434561  | 0,893473268  | -0,64703871 |  |
| 231974_at    | MLL2            | 0,841135803  | 1,488344553  | -0,64720875 |  |
| 1561574_at   | -               | -2,262747984 | -1,615132408 | -0,64761558 |  |
| 1562017_at   | LOC100130654    | -2,262747984 | -1,615132408 | -0,64761558 |  |
| 1563862_at   | TCEANC          | -2,262747984 | -1,615132408 | -0,64761558 |  |
| 207354_at    | CCL16           | -2,262747984 | -1,615132408 | -0,64761558 |  |
| 207597_at    | ADAM18          | -2,262747984 | -1,615132408 | -0,64761558 |  |
| 212392_s_at  | LOC728802 /// P | -2,262747984 | -1,615132408 | -0,64761558 |  |
| 215968_at    | -               | -2,262747984 | -1,615132408 | -0,64761558 |  |
| 242816_at    | -               | -2,262747984 | -1,615132408 | -0,64761558 |  |
| 243771_at    | -               | -2,262747984 | -1,615132408 | -0,64761558 |  |
| 1553082_at   | CRYGN           | -2,311268652 | -1,663414495 | -0,64785416 |  |
| 1556377_s_at | LMO7            | -2,311268652 | -1,663414495 | -0,64785416 |  |
| 1557422_at   | -               | -2,311268652 | -1,663414495 | -0,64785416 |  |
| 1562631_at   | TEX26-AS1       | -2,311268652 | -1,663414495 | -0,64785416 |  |
| 205955_at    | -               | -2,311268652 | -1,663414495 | -0,64785416 |  |
| 206305_s_at  | C8A             | -2,311268652 | -1,663414495 | -0,64785416 |  |
| 210352_at    | BRD8            | -2,311268652 | -1,663414495 | -0,64785416 |  |
| 211510_s_at  | CRHR2           | -2,311268652 | -1,663414495 | -0,64785416 |  |
| 216134_at    | FRMD4B          | -2,311268652 | -1,663414495 | -0,64785416 |  |
| 220228_at    | AP4E1           | -2,311268652 | -1,663414495 | -0,64785416 |  |
| 229241_at    | LDHD            | -2,311268652 | -1,663414495 | -0,64785416 |  |
| 230968_at    | -               | -2,311268652 | -1,663414495 | -0,64785416 |  |
| 231939_s_at  | BDP1            | -2,311268652 | -1,663414495 | -0,64785416 |  |
| 233491_at    | LOC100268168    | -2,311268652 | -1,663414495 | -0,64785416 |  |
| 235570_at    | RBMS3           | -2,311268652 | -1,663414495 | -0,64785416 |  |
| 239547_at    | HS3ST6          | -2,311268652 | -1,663414495 | -0,64785416 |  |

|              |                 |              |              |             |  |
|--------------|-----------------|--------------|--------------|-------------|--|
| 226362_at    | -               | 1,037706275  | 1,685812099  | -0,64810582 |  |
| 223524_s_at  | TMEM108         | 0,496120222  | 1,144305291  | -0,64818507 |  |
| 1557227_s_at | TPR             | -0,67289328  | -0,024572586 | -0,64832069 |  |
| 208763_s_at  | TSC22D3         | -0,67289328  | -0,024572586 | -0,64832069 |  |
| 201791_s_at  | DHCR7           | 2,281618189  | 2,93104672   | -0,64942853 |  |
| 207878_at    | KRT76           | -0,59053611  | 0,059218869  | -0,64975498 |  |
| 217564_s_at  | CPS1            | -0,59053611  | 0,059218869  | -0,64975498 |  |
| 240134_at    | -               | -0,59053611  | 0,059218869  | -0,64975498 |  |
| 236907_at    | -               | 0,792179257  | 1,442269454  | -0,6500902  |  |
| 1561867_at   | -               | -3,15396682  | -2,503677622 | -0,6502892  |  |
| 237614_at    | LOC285740       | -3,15396682  | -2,503677622 | -0,6502892  |  |
| 1570533_at   | CMPK1           | -1,763254337 | -1,112851844 | -0,65040249 |  |
| 214476_at    | TFF2            | -1,763254337 | -1,112851844 | -0,65040249 |  |
| 231408_at    | TMEM92          | -1,763254337 | -1,112851844 | -0,65040249 |  |
| 240984_at    | -               | -1,763254337 | -1,112851844 | -0,65040249 |  |
| 207186_s_at  | BPTF /// LOC146 | 3,202127528  | 3,853385784  | -0,65125826 |  |
| 206607_at    | CBL             | -0,622910612 | 0,028364014  | -0,65127463 |  |
| 214923_at    | ATP6V1D         | -0,622910612 | 0,028364014  | -0,65127463 |  |
| 1555875_at   | SRGAP1          | -1,470833215 | -0,819238336 | -0,65159488 |  |
| 1561352_at   | -               | -1,470833215 | -0,819238336 | -0,65159488 |  |
| 223900_s_at  | C3orf78         | -1,470833215 | -0,819238336 | -0,65159488 |  |
| 224259_at    | WNT8A           | -1,470833215 | -0,819238336 | -0,65159488 |  |
| 226918_at    | JPH4            | -1,470833215 | -0,819238336 | -0,65159488 |  |
| 233880_at    | RNF213          | -1,470833215 | -0,819238336 | -0,65159488 |  |
| 1561537_at   | LOC388906       | 0,82905153   | 1,480766833  | -0,6517153  |  |
| 227454_at    | TAOK1           | -0,234278768 | 0,417770464  | -0,65204923 |  |
| 1553839_at   | CCDC149         | -0,172274514 | 0,479907041  | -0,65218155 |  |
| 1552751_a_at | CIB3            | -0,543051993 | 0,109221392  | -0,65227339 |  |
| 1562415_a_at | SPOCD1          | -0,543051993 | 0,109221392  | -0,65227339 |  |
| 208196_x_at  | NFATC1          | -0,543051993 | 0,109221392  | -0,65227339 |  |
| 220093_at    | ANTXR1          | -0,543051993 | 0,109221392  | -0,65227339 |  |
| 240792_at    | -               | -0,543051993 | 0,109221392  | -0,65227339 |  |
| 234701_at    | ANKRD11         | 0,57058931   | 1,223626587  | -0,65303728 |  |
| 207348_s_at  | LIG3            | -0,259832361 | 0,393761504  | -0,65359387 |  |
| 1556067_a_at | KDM6B           | -0,136301282 | 0,51742585   | -0,65372713 |  |
| 214570_x_at  | LOC100294020 /  | -0,136301282 | 0,51742585   | -0,65372713 |  |
| 228849_at    | NTRK3           | 0,083054335  | 0,73688026   | -0,65382593 |  |
| 227039_at    | AKAP13          | 0,133056859  | 0,786897721  | -0,65384086 |  |
| 216476_at    | OR7E91P         | -0,57445847  | 0,079428135  | -0,65388661 |  |
| 236199_at    | -               | -0,57445847  | 0,079428135  | -0,65388661 |  |
| 244550_at    | -               | -0,496991414 | 0,157549243  | -0,65454066 |  |
| 1555431_a_at | IL31RA          | -2,866296344 | -2,211750327 | -0,65454602 |  |
| 205681_at    | BCL2A1          | -2,866296344 | -2,211750327 | -0,65454602 |  |
| 215442_s_at  | TSHR            | -2,866296344 | -2,211750327 | -0,65454602 |  |
| 216406_at    | -               | -2,866296344 | -2,211750327 | -0,65454602 |  |
| 216970_at    | RGS7            | -2,866296344 | -2,211750327 | -0,65454602 |  |
| 223848_at    | LOC100129198    | -2,866296344 | -2,211750327 | -0,65454602 |  |
| 233032_x_at  | -               | -2,866296344 | -2,211750327 | -0,65454602 |  |
| 234930_at    | -               | -2,866296344 | -2,211750327 | -0,65454602 |  |
| 241191_at    | -               | -2,866296344 | -2,211750327 | -0,65454602 |  |
| 206192_at    | CDSN            | -0,85085127  | -0,19610998  | -0,65474129 |  |
| 214184_at    | NPFF            | -0,85085127  | -0,19610998  | -0,65474129 |  |
| 214722_at    | NOTCH2NL        | 2,59162628   | 3,246908183  | -0,6552819  |  |
| 210798_x_at  | MASP2           | -1,047650486 | -0,39061235  | -0,65703814 |  |
| 215045_at    | CELF3           | -1,047650486 | -0,39061235  | -0,65703814 |  |
| 228182_at    | ADCY5           | -1,047650486 | -0,39061235  | -0,65703814 |  |

|              |              |              |              |             |  |
|--------------|--------------|--------------|--------------|-------------|--|
| 237652_at    | -            | -1,047650486 | -0,39061235  | -0,65703814 |  |
| 243410_at    | -            | -1,047650486 | -0,39061235  | -0,65703814 |  |
| 1560178_at   | -            | -1,812418401 | -1,154897679 | -0,65752072 |  |
| 1569738_at   | -            | -1,812418401 | -1,154897679 | -0,65752072 |  |
| 213630_at    | NACAD        | -1,812418401 | -1,154897679 | -0,65752072 |  |
| 239751_at    | LOC100506860 | -1,812418401 | -1,154897679 | -0,65752072 |  |
| 240964_at    | -            | -1,812418401 | -1,154897679 | -0,65752072 |  |
| 232940_s_at  | MLL3         | 1,163336153  | 1,820984782  | -0,65764863 |  |
| 232002_at    | -            | -0,033456564 | 0,624460759  | -0,65791732 |  |
| 211621_at    | AR           | -0,089689931 | 0,568365095  | -0,65805503 |  |
| 232522_at    | -            | -0,089689931 | 0,568365095  | -0,65805503 |  |
| 236931_at    | -            | -0,089689931 | 0,568365095  | -0,65805503 |  |
| 243842_at    | -            | -3,114791413 | -2,456406426 | -0,65838499 |  |
| 224303_x_at  | NIN          | 0,246434561  | 0,904843258  | -0,6584087  |  |
| 1564178_at   | LOC283033    | -1,424023738 | -0,765504029 | -0,65851971 |  |
| 224039_at    | FAM186B      | -1,424023738 | -0,765504029 | -0,65851971 |  |
| 234152_at    | -            | -1,424023738 | -0,765504029 | -0,65851971 |  |
| 219825_at    | CYP26B1      | 0,541261317  | 1,200746069  | -0,65948475 |  |
| 210799_at    | HTR1B        | -1,196375121 | -0,536087151 | -0,66028797 |  |
| 230603_at    | COL27A1      | -1,196375121 | -0,536087151 | -0,66028797 |  |
| 237929_at    | C17orf50     | -1,196375121 | -0,536087151 | -0,66028797 |  |
| 1561523_at   | CCDC65       | -2,823166348 | -2,162639771 | -0,66052658 |  |
| 1561535_at   | -            | -2,823166348 | -2,162639771 | -0,66052658 |  |
| 213960_at    | NTRK3        | -2,823166348 | -2,162639771 | -0,66052658 |  |
| 216616_at    | -            | -2,823166348 | -2,162639771 | -0,66052658 |  |
| 216802_at    | -            | -2,823166348 | -2,162639771 | -0,66052658 |  |
| 238595_at    | -            | -2,823166348 | -2,162639771 | -0,66052658 |  |
| 220496_at    | CLEC1B       | -0,706943342 | -0,046302147 | -0,66064119 |  |
| 236435_at    | -            | -0,706943342 | -0,046302147 | -0,66064119 |  |
| 230703_at    | -            | 1,742232072  | 2,403170156  | -0,66093808 |  |
| 226569_s_at  | CHTF18       | 0,911589958  | 1,572742379  | -0,66115242 |  |
| 1555387_at   | UBA1         | -1,308181863 | -0,646746079 | -0,66143578 |  |
| 1557244_a_at | -            | -1,308181863 | -0,646746079 | -0,66143578 |  |
| 1558515_at   | FTX          | -1,308181863 | -0,646746079 | -0,66143578 |  |
| 211991_s_at  | HLA-DPA1     | -1,308181863 | -0,646746079 | -0,66143578 |  |
| 216677_at    | ZNF154       | -1,308181863 | -0,646746079 | -0,66143578 |  |
| 222009_at    | CEMP1        | -1,308181863 | -0,646746079 | -0,66143578 |  |
| 230727_at    | CISD3        | -1,308181863 | -0,646746079 | -0,66143578 |  |
| 236303_at    | -            | -1,308181863 | -0,646746079 | -0,66143578 |  |
| 244718_at    | MTMR9LP      | -1,308181863 | -0,646746079 | -0,66143578 |  |
| 221864_at    | ORAI3        | 0,928678725  | 1,590454215  | -0,66177549 |  |
| 209703_x_at  | METTL7A      | -0,325749314 | 0,336136178  | -0,66188549 |  |
| 205245_at    | PARD6A       | -0,394749123 | 0,26733076   | -0,66207988 |  |
| 211947_s_at  | PRRC2C       | -0,394749123 | 0,26733076   | -0,66207988 |  |
| 233564_s_at  | CDADC1       | -0,394749123 | 0,26733076   | -0,66207988 |  |
| 1558919_a_at | SEC23IP      | -0,741668563 | -0,079522948 | -0,66214561 |  |
| 240962_at    | -            | -0,741668563 | -0,079522948 | -0,66214561 |  |
| 219789_at    | NPR3         | 2,05655332   | 2,718761062  | -0,66220774 |  |
| 205886_at    | REG1B        | -1,518072576 | -0,855751026 | -0,66232155 |  |
| 229186_s_at  | ZFP64        | -1,518072576 | -0,855751026 | -0,66232155 |  |
| 234534_at    | -            | -1,518072576 | -0,855751026 | -0,66232155 |  |
| 235357_at    | DPF3         | -1,518072576 | -0,855751026 | -0,66232155 |  |
| 240125_at    | -            | -1,518072576 | -0,855751026 | -0,66232155 |  |
| 241610_x_at  | -            | -1,518072576 | -0,855751026 | -0,66232155 |  |
| 208528_x_at  | SSX5         | -0,946847173 | -0,283667828 | -0,66317935 |  |
| 211507_s_at  | MTMR3        | -0,655928373 | 0,007421914  | -0,66335029 |  |

|              |               |              |              |             |  |
|--------------|---------------|--------------|--------------|-------------|--|
| 214377_s_at  | CTRL          | -0,655928373 | 0,007421914  | -0,66335029 |  |
| 216846_at    | CYAT1         | -0,655928373 | 0,007421914  | -0,66335029 |  |
| 1564308_a_at | MPP7          | -0,285837228 | 0,377530647  | -0,66336787 |  |
| 212187_x_at  | PTGDS         | -0,285837228 | 0,377530647  | -0,66336787 |  |
| 236355_s_at  | -             | 0,171847695  | 0,835239052  | -0,66339136 |  |
| 1566484_at   | -             | -0,986356909 | -0,322870281 | -0,66348663 |  |
| 1570192_at   | -             | -0,986356909 | -0,322870281 | -0,66348663 |  |
| 215856_at    | SIGLEC15      | -0,986356909 | -0,322870281 | -0,66348663 |  |
| 243414_at    | -             | -0,986356909 | -0,322870281 | -0,66348663 |  |
| 241618_at    | -             | -0,352951799 | 0,310717132  | -0,66366893 |  |
| 1554787_at   | C9orf96       | -1,71423189  | -1,050406615 | -0,66382527 |  |
| 1567044_s_at | -             | -1,71423189  | -1,050406615 | -0,66382527 |  |
| 202549_at    | VAPB          | -1,71423189  | -1,050406615 | -0,66382527 |  |
| 205378_s_at  | ACHE          | -1,71423189  | -1,050406615 | -0,66382527 |  |
| 213565_s_at  | SMAD6         | -1,71423189  | -1,050406615 | -0,66382527 |  |
| 216626_at    | -             | -1,71423189  | -1,050406615 | -0,66382527 |  |
| 223399_x_at  | C3orf78       | -1,71423189  | -1,050406615 | -0,66382527 |  |
| 233188_at    | GALNTL4       | -1,71423189  | -1,050406615 | -0,66382527 |  |
| 240306_at    | LINC00312     | -1,71423189  | -1,050406615 | -0,66382527 |  |
| 244354_at    | STRN          | 0,503742507  | 1,16809119   | -0,66434868 |  |
| 214834_at    | PAR5          | -3,287237186 | -2,621331989 | -0,6659052  |  |
| 231598_x_at  | -             | -3,287237186 | -2,621331989 | -0,6659052  |  |
| 218564_at    | RFWD3         | 1,314003737  | 1,979940779  | -0,66593704 |  |
| 1563484_at   | -             | -2,089474779 | -1,423348341 | -0,66612644 |  |
| 208380_at    | LBX1          | -2,089474779 | -1,423348341 | -0,66612644 |  |
| 233209_at    | LOC200609     | -2,089474779 | -1,423348341 | -0,66612644 |  |
| 240680_at    | -             | -2,089474779 | -1,423348341 | -0,66612644 |  |
| 242436_at    | -             | -2,089474779 | -1,423348341 | -0,66612644 |  |
| 243890_at    | -             | -2,089474779 | -1,423348341 | -0,66612644 |  |
| 1556212_x_at | -             | -3,07502285  | -2,408705138 | -0,66631771 |  |
| 1559709_at   | -             | -3,07502285  | -2,408705138 | -0,66631771 |  |
| 1560038_at   | LOC100506071  | -3,07502285  | -2,408705138 | -0,66631771 |  |
| 1570517_at   | FHL5          | -3,07502285  | -2,408705138 | -0,66631771 |  |
| 222208_s_at  | POLR2J4       | -0,112808516 | 0,553993624  | -0,66680214 |  |
| 226046_at    | MAPK8         | -0,234278768 | 0,433557298  | -0,66783607 |  |
| 216001_at    | PRAMEF12      | -0,888496123 | -0,220592223 | -0,6679039  |  |
| 218552_at    | ECHDC2        | -0,888496123 | -0,220592223 | -0,6679039  |  |
| 237630_s_at  | FLJ10661      | -0,888496123 | -0,220592223 | -0,6679039  |  |
| 1553413_at   | FLJ13744      | -1,888254346 | -1,220210588 | -0,66804376 |  |
| 1557149_at   | -             | -1,888254346 | -1,220210588 | -0,66804376 |  |
| 204365_s_at  | REEP1         | -1,888254346 | -1,220210588 | -0,66804376 |  |
| 211194_s_at  | TP63          | -1,888254346 | -1,220210588 | -0,66804376 |  |
| 216004_s_at  | PKNOX1        | -1,888254346 | -1,220210588 | -0,66804376 |  |
| 221047_s_at  | MARK1         | -1,888254346 | -1,220210588 | -0,66804376 |  |
| 231253_at    | SPPL2C        | -1,888254346 | -1,220210588 | -0,66804376 |  |
| 237672_at    | -             | -1,888254346 | -1,220210588 | -0,66804376 |  |
| 237687_at    | LOC283737     | -1,888254346 | -1,220210588 | -0,66804376 |  |
| 238253_at    | WDR72         | -1,888254346 | -1,220210588 | -0,66804376 |  |
| 238772_at    | ZNF207        | -1,888254346 | -1,220210588 | -0,66804376 |  |
| 244286_at    | -             | -1,888254346 | -1,220210588 | -0,66804376 |  |
| 1557632_at   | IKZF1         | -1,399512875 | -0,730778808 | -0,66873407 |  |
| 220862_s_at  | USP22         | -1,399512875 | -0,730778808 | -0,66873407 |  |
| 231986_at    | RIMS1         | -1,399512875 | -0,730778808 | -0,66873407 |  |
| 243687_at    | LOC100498859  | -1,399512875 | -0,730778808 | -0,66873407 |  |
| 211835_at    | IGK@ /// IGKC | -0,926850548 | -0,258114234 | -0,66873631 |  |
| 221244_s_at  | PDPK1         | -0,926850548 | -0,258114234 | -0,66873631 |  |



|              |                  |              |              |             |  |
|--------------|------------------|--------------|--------------|-------------|--|
| 236340_at    | C7orf13 /// LOC1 | -0,926850548 | -0,258114234 | -0,66873631 |  |
| 211802_x_at  | CACNA1G          | 0,291166226  | 0,960386719  | -0,66922049 |  |
| 1562456_at   | -                | -1,131062212 | -0,461594427 | -0,66946779 |  |
| 213332_at    | PAPPA2           | -1,131062212 | -0,461594427 | -0,66946779 |  |
| 215956_at    | -                | -1,131062212 | -0,461594427 | -0,66946779 |  |
| 229335_at    | CADM4            | -1,131062212 | -0,461594427 | -0,66946779 |  |
| 234958_at    | -                | -1,131062212 | -0,461594427 | -0,66946779 |  |
| 239606_at    | -                | -1,131062212 | -0,461594427 | -0,66946779 |  |
| 1557113_at   | LOC283588        | -2,756478458 | -2,086984744 | -0,66949371 |  |
| 1569371_at   | LRRC59           | -2,756478458 | -2,086984744 | -0,66949371 |  |
| 1569560_at   | HIRA             | -2,756478458 | -2,086984744 | -0,66949371 |  |
| 216556_x_at  | -                | -2,756478458 | -2,086984744 | -0,66949371 |  |
| 217003_s_at  | ADAM5P           | -2,756478458 | -2,086984744 | -0,66949371 |  |
| 221042_s_at  | CLMN             | -2,756478458 | -2,086984744 | -0,66949371 |  |
| 223704_s_at  | DMRT2            | -2,756478458 | -2,086984744 | -0,66949371 |  |
| 224089_at    | -                | -2,756478458 | -2,086984744 | -0,66949371 |  |
| 234704_at    | -                | -2,756478458 | -2,086984744 | -0,66949371 |  |
| 236750_at    | -                | -2,756478458 | -2,086984744 | -0,66949371 |  |
| 241535_at    | LOC100292909     | -2,756478458 | -2,086984744 | -0,66949371 |  |
| 241750_x_at  | -                | -2,756478458 | -2,086984744 | -0,66949371 |  |
| 243422_at    | -                | -2,756478458 | -2,086984744 | -0,66949371 |  |
| 215545_at    | -                | -0,512251684 | 0,157549243  | -0,66980093 |  |
| 223321_s_at  | FGFRL1           | 0,317354302  | 0,987376598  | -0,6700223  |  |
| 208219_at    | ACVR1B           | -1,2845686   | -0,614371577 | -0,67019702 |  |
| 212758_s_at  | ZEB1             | -1,2845686   | -0,614371577 | -0,67019702 |  |
| 214826_at    | PDE12            | -1,2845686   | -0,614371577 | -0,67019702 |  |
| 223720_at    | SPINK7           | -1,2845686   | -0,614371577 | -0,67019702 |  |
| 225301_s_at  | MYO5B            | -1,2845686   | -0,614371577 | -0,67019702 |  |
| 207421_at    | CA5A             | -1,089016378 | -0,41858459  | -0,67043179 |  |
| 215593_at    | -                | -1,089016378 | -0,41858459  | -0,67043179 |  |
| 232571_at    | -                | -1,089016378 | -0,41858459  | -0,67043179 |  |
| 229880_at    | LOC100506014     | 0,995078803  | 1,665902186  | -0,67082338 |  |
| 228693_at    | CCDC50           | -0,467091869 | 0,204310755  | -0,67140262 |  |
| 229571_at    | -                | -0,467091869 | 0,204310755  | -0,67140262 |  |
| 231888_at    | -                | -0,033456564 | 0,638150376  | -0,67160694 |  |
| 1552476_s_at | PLCD3            | -0,543051993 | 0,128747141  | -0,67179913 |  |
| 1558874_a_at | -                | -0,543051993 | 0,128747141  | -0,67179913 |  |
| 207104_x_at  | LILRB1           | -0,543051993 | 0,128747141  | -0,67179913 |  |
| 215676_at    | BRF1             | -0,543051993 | 0,128747141  | -0,67179913 |  |
| 226470_at    | GGT7             | 0,133056859  | 0,805216064  | -0,67215921 |  |
| 1560939_at   | PCOLCE-AS1       | 0,457392764  | 1,129843209  | -0,67245044 |  |
| 220782_x_at  | KLK12            | 0,083054335  | 0,755840599  | -0,67278626 |  |
| 216682_s_at  | FAM48A           | -0,423248115 | 0,249604176  | -0,67285229 |  |
| 232528_at    | -                | -0,423248115 | 0,249604176  | -0,67285229 |  |
| 214166_at    | SDHB             | -1,240169874 | -0,566887459 | -0,67328241 |  |
| 216243_s_at  | IL1RN            | -1,240169874 | -0,566887459 | -0,67328241 |  |
| 218692_at    | SYBU             | -1,240169874 | -0,566887459 | -0,67328241 |  |
| 229561_at    | LRRC16B          | -1,240169874 | -0,566887459 | -0,67328241 |  |
| 232968_at    | FANK1            | -1,240169874 | -0,566887459 | -0,67328241 |  |
| 233212_at    | -                | -1,240169874 | -0,566887459 | -0,67328241 |  |
| 235701_at    | -                | -1,240169874 | -0,566887459 | -0,67328241 |  |
| 239997_at    | -                | -1,240169874 | -0,566887459 | -0,67328241 |  |
| 244140_at    | -                | -1,240169874 | -0,566887459 | -0,67328241 |  |
| 206880_at    | P2RX6            | -0,496991414 | 0,176436073  | -0,67342749 |  |
| 226134_s_at  | -                | 0,03125738   | 0,704715219  | -0,67345784 |  |
| 1558469_at   | LPP              | -1,937711681 | -1,264005341 | -0,67370634 |  |

|              |                 |              |              |             |  |
|--------------|-----------------|--------------|--------------|-------------|--|
| 1561199_at   | -               | -1,937711681 | -1,264005341 | -0,67370634 |  |
| 1561419_at   | -               | -1,937711681 | -1,264005341 | -0,67370634 |  |
| 1561917_at   | -               | -1,937711681 | -1,264005341 | -0,67370634 |  |
| 1562214_at   | LOC151171       | -1,937711681 | -1,264005341 | -0,67370634 |  |
| 205426_s_at  | HIP1            | -1,937711681 | -1,264005341 | -0,67370634 |  |
| 210551_s_at  | ASMT            | -1,937711681 | -1,264005341 | -0,67370634 |  |
| 211315_s_at  | CACNA1G         | -1,937711681 | -1,264005341 | -0,67370634 |  |
| 216349_at    | DGKH            | -1,937711681 | -1,264005341 | -0,67370634 |  |
| 220440_at    | LGALS13         | -1,937711681 | -1,264005341 | -0,67370634 |  |
| 224279_s_at  | CABYR           | -1,937711681 | -1,264005341 | -0,67370634 |  |
| 231549_at    | C1orf158        | -1,937711681 | -1,264005341 | -0,67370634 |  |
| 236628_at    | -               | -1,937711681 | -1,264005341 | -0,67370634 |  |
| 238798_at    | TAPT1           | -1,937711681 | -1,264005341 | -0,67370634 |  |
| 241831_at    | -               | -1,937711681 | -1,264005341 | -0,67370634 |  |
| 242322_at    | -               | -1,937711681 | -1,264005341 | -0,67370634 |  |
| 243149_at    | -               | -1,937711681 | -1,264005341 | -0,67370634 |  |
| 1556181_at   | ANKRD65         | -1,353583928 | -0,679763839 | -0,67382009 |  |
| 1566647_s_at | LOC149086       | -1,353583928 | -0,679763839 | -0,67382009 |  |
| 204121_at    | GADD45G         | -1,353583928 | -0,679763839 | -0,67382009 |  |
| 207056_s_at  | SLC4A8          | -1,353583928 | -0,679763839 | -0,67382009 |  |
| 209496_at    | RARRES2         | -1,353583928 | -0,679763839 | -0,67382009 |  |
| 210773_s_at  | FPR2            | -1,353583928 | -0,679763839 | -0,67382009 |  |
| 220090_at    | CRNN            | -1,353583928 | -0,679763839 | -0,67382009 |  |
| 220343_at    | PDE7B           | -1,353583928 | -0,679763839 | -0,67382009 |  |
| 221112_at    | IL1RAPL2        | -1,353583928 | -0,679763839 | -0,67382009 |  |
| 229987_at    | -               | -1,353583928 | -0,679763839 | -0,67382009 |  |
| 233029_at    | OBSCN           | -1,353583928 | -0,679763839 | -0,67382009 |  |
| 238225_at    | MIR146A         | -1,353583928 | -0,679763839 | -0,67382009 |  |
| 238227_at    | -               | -1,353583928 | -0,679763839 | -0,67382009 |  |
| 1553524_at   | DGKB            | -2,712026959 | -2,037551727 | -0,67447523 |  |
| 1566114_at   | -               | -2,712026959 | -2,037551727 | -0,67447523 |  |
| 210848_at    | -               | -2,712026959 | -2,037551727 | -0,67447523 |  |
| 217026_at    | CFTR            | -2,712026959 | -2,037551727 | -0,67447523 |  |
| 224052_at    | HSFY1 /// HSFY2 | -2,712026959 | -2,037551727 | -0,67447523 |  |
| 240485_at    | -               | -2,712026959 | -2,037551727 | -0,67447523 |  |
| 217055_x_at  | -               | -0,196756757 | 0,479907041  | -0,6766638  |  |
| 215167_at    | MED14           | 0,228146222  | 0,904843258  | -0,67669704 |  |
| 1564783_x_at | OFCC1           | -1,026571149 | -0,34958478  | -0,67698637 |  |
| 204503_at    | EVPL            | -1,026571149 | -0,34958478  | -0,67698637 |  |
| 206409_at    | TIAM1           | -1,026571149 | -0,34958478  | -0,67698637 |  |
| 229889_at    | FAM211A         | -1,026571149 | -0,34958478  | -0,67698637 |  |
| 244310_at    | -               | -1,026571149 | -0,34958478  | -0,67698637 |  |
| 214530_x_at  | EPB41           | -0,366776884 | 0,310717132  | -0,67749402 |  |
| 1559697_a_at | -               | -0,259832361 | 0,417770464  | -0,67760282 |  |
| 1560512_at   | -               | -1,688127507 | -1,010192375 | -0,67793513 |  |
| 1564402_at   | LOC146795       | -1,688127507 | -1,010192375 | -0,67793513 |  |
| 237146_at    | -               | -1,688127507 | -1,010192375 | -0,67793513 |  |
| 241212_at    | -               | -1,688127507 | -1,010192375 | -0,67793513 |  |
| 1557812_a_at | -               | -3,013665402 | -2,335104118 | -0,67856128 |  |
| 1561146_at   | VPS35           | -3,013665402 | -2,335104118 | -0,67856128 |  |
| 216746_at    | -               | -3,013665402 | -2,335104118 | -0,67856128 |  |
| 232985_s_at  | DPPA4           | -3,013665402 | -2,335104118 | -0,67856128 |  |
| 229520_s_at  | C14orf118       | 1,58584542   | 2,264418116  | -0,6785727  |  |
| 205325_at    | PHYHIP          | -1,591296941 | -0,912331589 | -0,67896535 |  |
| 220554_at    | SLC22A7         | -1,591296941 | -0,912331589 | -0,67896535 |  |
| 235477_at    | -               | -1,591296941 | -0,912331589 | -0,67896535 |  |

|              |                 |              |              |             |  |
|--------------|-----------------|--------------|--------------|-------------|--|
| 220617_s_at  | ZNF532          | -0,089689931 | 0,589657387  | -0,67934732 |  |
| 217890_s_at  | PARVA           | -0,759588698 | -0,079522948 | -0,68006575 |  |
| 206706_at    | NTF3            | -0,67289328  | 0,007421914  | -0,68031519 |  |
| 243258_at    | KIAA0664        | -0,67289328  | 0,007421914  | -0,68031519 |  |
| 1568702_a_at | PAAF1           | -0,148196756 | 0,532164371  | -0,68036113 |  |
| 1553321_a_at | SULT1C4         | -2,64318869  | -1,961547147 | -0,68164154 |  |
| 1553626_a_at | C17orf57        | -2,64318869  | -1,961547147 | -0,68164154 |  |
| 1555113_at   | PARD3B          | -2,64318869  | -1,961547147 | -0,68164154 |  |
| 1555221_at   | -               | -2,64318869  | -1,961547147 | -0,68164154 |  |
| 1559970_at   | -               | -2,64318869  | -1,961547147 | -0,68164154 |  |
| 1562443_at   | CLVS2           | -2,64318869  | -1,961547147 | -0,68164154 |  |
| 1566607_at   | -               | -2,64318869  | -1,961547147 | -0,68164154 |  |
| 206071_s_at  | EPHA3           | -2,64318869  | -1,961547147 | -0,68164154 |  |
| 211424_x_at  | METTL7A         | -2,64318869  | -1,961547147 | -0,68164154 |  |
| 230957_at    | PCDHB19P        | -2,64318869  | -1,961547147 | -0,68164154 |  |
| 234207_at    | -               | -2,64318869  | -1,961547147 | -0,68164154 |  |
| 238938_at    | -               | -2,64318869  | -1,961547147 | -0,68164154 |  |
| 244093_at    | -               | -2,64318869  | -1,961547147 | -0,68164154 |  |
| 1556627_at   | DRP2            | -2,01371626  | -1,332017329 | -0,68169893 |  |
| 1561536_at   | LOC283435       | -2,01371626  | -1,332017329 | -0,68169893 |  |
| 1566844_at   | PER4            | -2,01371626  | -1,332017329 | -0,68169893 |  |
| 1569430_at   | PTRH1           | -2,01371626  | -1,332017329 | -0,68169893 |  |
| 208349_at    | TRPA1           | -2,01371626  | -1,332017329 | -0,68169893 |  |
| 221728_x_at  | XIST            | -2,01371626  | -1,332017329 | -0,68169893 |  |
| 224287_at    | -               | -2,01371626  | -1,332017329 | -0,68169893 |  |
| 233104_at    | PABPC1L         | -2,01371626  | -1,332017329 | -0,68169893 |  |
| 233521_at    | -               | -2,01371626  | -1,332017329 | -0,68169893 |  |
| 234215_at    | -               | -2,01371626  | -1,332017329 | -0,68169893 |  |
| 242494_at    | -               | -2,01371626  | -1,332017329 | -0,68169893 |  |
| 243012_at    | -               | -2,01371626  | -1,332017329 | -0,68169893 |  |
| 224852_at    | TTC17           | 0,695652136  | 1,378453643  | -0,68280151 |  |
| 212921_at    | SMYD2           | -1,173767127 | -0,490927335 | -0,68283979 |  |
| 220683_at    | RDH8            | -1,173767127 | -0,490927335 | -0,68283979 |  |
| 226408_at    | TEAD2           | -1,173767127 | -0,490927335 | -0,68283979 |  |
| 230558_at    | KNDC1           | -1,173767127 | -0,490927335 | -0,68283979 |  |
| 238140_at    | ARV1            | -1,173767127 | -0,490927335 | -0,68283979 |  |
| 1556373_a_at | -               | 0,641402394  | 1,324440845  | -0,68303845 |  |
| 1559111_a_at | -               | -1,838812296 | -1,154897679 | -0,68391462 |  |
| 203999_at    | SYT1            | -1,838812296 | -1,154897679 | -0,68391462 |  |
| 204589_at    | NUAK1           | -1,838812296 | -1,154897679 | -0,68391462 |  |
| 207249_s_at  | SLC28A2         | -1,838812296 | -1,154897679 | -0,68391462 |  |
| 220410_s_at  | CAMSAP1         | -1,838812296 | -1,154897679 | -0,68391462 |  |
| 236361_at    | GALNTL2         | -1,838812296 | -1,154897679 | -0,68391462 |  |
| 237338_at    | B3GNT8          | -1,838812296 | -1,154897679 | -0,68391462 |  |
| 239631_at    | -               | -1,838812296 | -1,154897679 | -0,68391462 |  |
| 239701_at    | -               | -1,838812296 | -1,154897679 | -0,68391462 |  |
| 240425_x_at  | ROBO2           | -1,838812296 | -1,154897679 | -0,68391462 |  |
| 228644_s_at  | SLC12A4         | -0,655928373 | 0,028364014  | -0,68429239 |  |
| 232621_at    | USP48           | -0,655928373 | 0,028364014  | -0,68429239 |  |
| 1552401_a_at | BACH1 /// GRIK1 | -2,597496523 | -1,912089812 | -0,68540671 |  |
| 1569064_at   | C15orf62        | -2,597496523 | -1,912089812 | -0,68540671 |  |
| 1570537_a_at | -               | -2,597496523 | -1,912089812 | -0,68540671 |  |
| 236512_at    | -               | -2,597496523 | -1,912089812 | -0,68540671 |  |
| 237501_at    | -               | -2,597496523 | -1,912089812 | -0,68540671 |  |
| 239887_at    | -               | -2,597496523 | -1,912089812 | -0,68540671 |  |
| 241193_at    | ETS2            | -2,597496523 | -1,912089812 | -0,68540671 |  |

|              |              |              |              |             |  |
|--------------|--------------|--------------|--------------|-------------|--|
| 243036_at    | CCDC30       | -2,597496523 | -1,912089812 | -0,68540671 |  |
| 1555612_s_at | G6PC         | -2,063149277 | -1,377419394 | -0,68572988 |  |
| 1561806_at   | -            | -2,063149277 | -1,377419394 | -0,68572988 |  |
| 1562923_at   | -            | -2,063149277 | -1,377419394 | -0,68572988 |  |
| 1562933_at   | -            | -2,063149277 | -1,377419394 | -0,68572988 |  |
| 203221_at    | TLE1         | -2,063149277 | -1,377419394 | -0,68572988 |  |
| 211564_s_at  | PDLIM4       | -2,063149277 | -1,377419394 | -0,68572988 |  |
| 215638_at    | ERBB3        | -2,063149277 | -1,377419394 | -0,68572988 |  |
| 220107_s_at  | ZC2HC1C      | -2,063149277 | -1,377419394 | -0,68572988 |  |
| 223767_at    | GPR84        | -2,063149277 | -1,377419394 | -0,68572988 |  |
| 228302_x_at  | CAMK2N1      | -2,063149277 | -1,377419394 | -0,68572988 |  |
| 229978_at    | SHISA9       | -2,063149277 | -1,377419394 | -0,68572988 |  |
| 236639_at    | LOC100507596 | -2,063149277 | -1,377419394 | -0,68572988 |  |
| 244763_at    | MTRF1        | -2,063149277 | -1,377419394 | -0,68572988 |  |
| 1561631_at   | -            | -2,972500237 | -2,286583451 | -0,68591679 |  |
| 204755_x_at  | HLF          | -2,972500237 | -2,286583451 | -0,68591679 |  |
| 220076_at    | ANKH         | -2,972500237 | -2,286583451 | -0,68591679 |  |
| 225939_at    | EIF4E3       | -2,972500237 | -2,286583451 | -0,68591679 |  |
| 237474_at    | -            | -2,972500237 | -2,286583451 | -0,68591679 |  |
| 240330_at    | -            | -2,972500237 | -2,286583451 | -0,68591679 |  |
| 1553875_s_at | ZSCAN10      | -0,43775896  | 0,249604176  | -0,68736314 |  |
| 242580_at    | -            | -1,543331864 | -0,855751026 | -0,68758084 |  |
| 1553879_a_at | GOT1L1       | -2,551294263 | -1,862647763 | -0,6886465  |  |
| 1555095_at   | C6orf123     | -2,551294263 | -1,862647763 | -0,6886465  |  |
| 1564591_a_at | TMC1         | -2,551294263 | -1,862647763 | -0,6886465  |  |
| 243460_at    | -            | -2,551294263 | -1,862647763 | -0,6886465  |  |
| 244079_at    | LRRC72       | -2,551294263 | -1,862647763 | -0,6886465  |  |
| 1556724_at   | LOC100288490 | -0,946847173 | -0,258114234 | -0,68873294 |  |
| 1570479_at   | ART1         | -0,946847173 | -0,258114234 | -0,68873294 |  |
| 204428_s_at  | LCAT         | -0,946847173 | -0,258114234 | -0,68873294 |  |
| 208105_at    | GIPR         | -0,946847173 | -0,258114234 | -0,68873294 |  |
| 216128_at    | TBCD         | -0,946847173 | -0,258114234 | -0,68873294 |  |
| 233360_at    | UBE2I        | -0,946847173 | -0,258114234 | -0,68873294 |  |
| 1556406_at   | LOC255025    | -1,639579028 | -0,950686014 | -0,68889301 |  |
| 1562244_at   | ZNF578       | -1,639579028 | -0,950686014 | -0,68889301 |  |
| 1562953_s_at | WDFY3-AS2    | -1,639579028 | -0,950686014 | -0,68889301 |  |
| 1563027_at   | -            | -1,639579028 | -0,950686014 | -0,68889301 |  |
| 1569867_at   | EME2         | -1,639579028 | -0,950686014 | -0,68889301 |  |
| 206480_at    | LTC4S        | -1,639579028 | -0,950686014 | -0,68889301 |  |
| 208038_at    | IL1RL2       | -1,639579028 | -0,950686014 | -0,68889301 |  |
| 208379_x_at  | NPY2R        | -1,639579028 | -0,950686014 | -0,68889301 |  |
| 216394_x_at  | -            | -1,639579028 | -0,950686014 | -0,68889301 |  |
| 224542_s_at  | NFATC2       | -1,639579028 | -0,950686014 | -0,68889301 |  |
| 227121_at    | -            | -1,639579028 | -0,950686014 | -0,68889301 |  |
| 231415_at    | WBSCR22      | -1,639579028 | -0,950686014 | -0,68889301 |  |
| 237273_at    | KCNU1        | -1,639579028 | -0,950686014 | -0,68889301 |  |
| 241874_at    | IGIP         | -1,639579028 | -0,950686014 | -0,68889301 |  |
| 210769_at    | CNGB1        | -0,467091869 | 0,222599095  | -0,68969096 |  |
| 238715_at    | LOC646014    | -0,467091869 | 0,222599095  | -0,68969096 |  |
| 205256_at    | ZBTB39       | 0,533835206  | 1,223626587  | -0,68979138 |  |
| 214713_at    | YLP1M1       | 0,900083947  | 1,590454215  | -0,69037027 |  |
| 220297_at    | BTBD7        | -0,196756757 | 0,495031851  | -0,69178861 |  |
| 230755_at    | RHBDL3       | -0,888496123 | -0,19610998  | -0,69238614 |  |
| 1562296_at   | -            | -2,779459409 | -2,086984744 | -0,69247466 |  |
| 206166_s_at  | CLCA2        | -2,779459409 | -2,086984744 | -0,69247466 |  |
| 205564_at    | PAGE4        | -2,479842156 | -1,787089803 | -0,69275235 |  |

|              |                 |              |              |             |  |
|--------------|-----------------|--------------|--------------|-------------|--|
| 210722_at    | PNLIPRP1        | -2,479842156 | -1,787089803 | -0,69275235 |  |
| 213493_at    | SNED1           | -2,479842156 | -1,787089803 | -0,69275235 |  |
| 220674_at    | CD22            | -2,479842156 | -1,787089803 | -0,69275235 |  |
| 231783_at    | CHRM1           | -2,479842156 | -1,787089803 | -0,69275235 |  |
| 236377_at    | TMEM132D        | -2,479842156 | -1,787089803 | -0,69275235 |  |
| 240194_at    | LOC441204       | -2,479842156 | -1,787089803 | -0,69275235 |  |
| 240890_at    | LOC643733       | -2,479842156 | -1,787089803 | -0,69275235 |  |
| 241266_at    | -               | -2,479842156 | -1,787089803 | -0,69275235 |  |
| 215356_at    | TDRD12          | -0,299034815 | 0,393761504  | -0,69279632 |  |
| 1554791_a_at | KANSL1L         | -1,424023738 | -0,730778808 | -0,69324493 |  |
| 1558368_s_at | C1orf187        | -1,424023738 | -0,730778808 | -0,69324493 |  |
| 1560132_a_at | -               | -1,424023738 | -0,730778808 | -0,69324493 |  |
| 204392_at    | CAMK1           | -1,424023738 | -0,730778808 | -0,69324493 |  |
| 216866_s_at  | COL14A1         | -1,424023738 | -0,730778808 | -0,69324493 |  |
| 234047_at    | -               | -1,424023738 | -0,730778808 | -0,69324493 |  |
| 1557803_at   | -               | -2,187914861 | -1,494668682 | -0,69324618 |  |
| 1559668_s_at | -               | -2,187914861 | -1,494668682 | -0,69324618 |  |
| 204723_at    | SCN3B           | -2,187914861 | -1,494668682 | -0,69324618 |  |
| 210259_s_at  | DLX4            | -2,187914861 | -1,494668682 | -0,69324618 |  |
| 214648_at    | GPX5            | -2,187914861 | -1,494668682 | -0,69324618 |  |
| 220043_s_at  | MFI2            | -2,187914861 | -1,494668682 | -0,69324618 |  |
| 228528_at    | -               | -2,187914861 | -1,494668682 | -0,69324618 |  |
| 244070_at    | SYNE1           | -2,187914861 | -1,494668682 | -0,69324618 |  |
| 223509_at    | CLDN2           | -0,79540287  | -0,102100538 | -0,69330233 |  |
| 1565556_at   | LOC127841       | -1,308181863 | -0,614371577 | -0,69381029 |  |
| 231243_s_at  | BHLHE41         | -1,308181863 | -0,614371577 | -0,69381029 |  |
| 239551_at    | -               | -1,308181863 | -0,614371577 | -0,69381029 |  |
| 1554971_at   | OK/SW-CL.58     | -2,43257096  | -1,738067356 | -0,6945036  |  |
| 214655_at    | GPR6            | -2,43257096  | -1,738067356 | -0,6945036  |  |
| 222141_at    | KLHL22          | -2,43257096  | -1,738067356 | -0,6945036  |  |
| 225544_at    | TBX3            | -2,43257096  | -1,738067356 | -0,6945036  |  |
| 230403_at    | RFX3            | -2,43257096  | -1,738067356 | -0,6945036  |  |
| 231275_at    | FLJ42875        | -2,43257096  | -1,738067356 | -0,6945036  |  |
| 234170_at    | -               | -2,43257096  | -1,738067356 | -0,6945036  |  |
| 1554702_at   | NALCN           | -2,236765673 | -1,541908042 | -0,69485763 |  |
| 1558890_at   | LOC100507054    | -2,236765673 | -1,541908042 | -0,69485763 |  |
| 1566937_at   | -               | -2,236765673 | -1,541908042 | -0,69485763 |  |
| 207859_s_at  | CHRNA3          | -2,236765673 | -1,541908042 | -0,69485763 |  |
| 210614_at    | TTPA            | -2,236765673 | -1,541908042 | -0,69485763 |  |
| 215162_at    | RALGAPA1        | -2,236765673 | -1,541908042 | -0,69485763 |  |
| 232665_x_at  | -               | -2,236765673 | -1,541908042 | -0,69485763 |  |
| 235641_at    | TRIB1           | -2,236765673 | -1,541908042 | -0,69485763 |  |
| 237470_at    | DOCK7           | -2,236765673 | -1,541908042 | -0,69485763 |  |
| 240046_at    | -               | -2,236765673 | -1,541908042 | -0,69485763 |  |
| 241791_at    | TTN             | -2,236765673 | -1,541908042 | -0,69485763 |  |
| 219268_at    | ETNK2           | -0,83191556  | -0,136643983 | -0,69527158 |  |
| 220137_at    | VSIG10          | -0,83191556  | -0,136643983 | -0,69527158 |  |
| 233580_at    | -               | 0,359971644  | 1,055274826  | -0,69530318 |  |
| 1560224_at   | AHCTF1          | -0,741668563 | -0,046302147 | -0,69536642 |  |
| 1555540_at   | TGFB3           | -2,359436556 | -1,663414495 | -0,69602206 |  |
| 1555647_a_at | FOXP2           | -2,359436556 | -1,663414495 | -0,69602206 |  |
| 208525_s_at  | OR2F1 /// OR2F2 | -2,359436556 | -1,663414495 | -0,69602206 |  |
| 214418_at    | CT62            | -2,359436556 | -1,663414495 | -0,69602206 |  |
| 215864_at    | -               | -2,359436556 | -1,663414495 | -0,69602206 |  |
| 221087_s_at  | APOL3           | -2,359436556 | -1,663414495 | -0,69602206 |  |
| 231522_at    | C2orf144        | -2,359436556 | -1,663414495 | -0,69602206 |  |

|              |                 |              |              |             |  |
|--------------|-----------------|--------------|--------------|-------------|--|
| 233815_at    | NAALAD2         | -2,359436556 | -1,663414495 | -0,69602206 |  |
| 236057_at    | KCTD1           | -2,359436556 | -1,663414495 | -0,69602206 |  |
| 239492_at    | SEC14L4         | -2,359436556 | -1,663414495 | -0,69602206 |  |
| 244120_at    | LOC340178       | -2,359436556 | -1,663414495 | -0,69602206 |  |
| 1569171_a_at | -               | -2,311268652 | -1,615132408 | -0,69613624 |  |
| 236620_at    | RIF1            | 1,897847661  | 2,594367918  | -0,69652026 |  |
| 1554571_at   | APBB1IP         | -2,908843709 | -2,211750327 | -0,69709338 |  |
| 208019_at    | ZNF157          | -2,908843709 | -2,211750327 | -0,69709338 |  |
| 217060_at    | -               | -2,908843709 | -2,211750327 | -0,69709338 |  |
| 240707_at    | -               | -2,908843709 | -2,211750327 | -0,69709338 |  |
| 1556461_at   | -               | -3,15396682  | -2,456406426 | -0,69756039 |  |
| 210297_s_at  | MSMB            | -3,15396682  | -2,456406426 | -0,69756039 |  |
| 233953_at    | GUCA1C          | -3,15396682  | -2,456406426 | -0,69756039 |  |
| 1557400_at   | -               | -1,047650486 | -0,34958478  | -0,69806571 |  |
| 1567519_at   | PLXNA3          | -1,047650486 | -0,34958478  | -0,69806571 |  |
| 215121_x_at  | CYAT1 /// IGLC1 | -1,047650486 | -0,34958478  | -0,69806571 |  |
| 235344_at    | PPM1A           | -1,047650486 | -0,34958478  | -0,69806571 |  |
| 243425_at    | LOC100506521    | -1,047650486 | -0,34958478  | -0,69806571 |  |
| 233158_at    | KRT82           | -1,089016378 | -0,39061235  | -0,69840403 |  |
| 238356_at    | DOCK11          | -1,089016378 | -0,39061235  | -0,69840403 |  |
| 1561502_x_at | CTU2            | -1,518072576 | -0,819238336 | -0,69883424 |  |
| 210688_s_at  | CPT1A           | -1,518072576 | -0,819238336 | -0,69883424 |  |
| 228947_x_at  | TMEM204         | -1,518072576 | -0,819238336 | -0,69883424 |  |
| 231902_at    | ZNF827          | -1,518072576 | -0,819238336 | -0,69883424 |  |
| 234576_at    | ANPEP           | -1,518072576 | -0,819238336 | -0,69883424 |  |
| 237343_at    | LOC100505964    | -1,518072576 | -0,819238336 | -0,69883424 |  |
| 220627_at    | CST8            | -1,812418401 | -1,112851844 | -0,69956656 |  |
| 221401_at    | CACNG5          | -1,812418401 | -1,112851844 | -0,69956656 |  |
| 229552_at    | LOC283454       | -1,812418401 | -1,112851844 | -0,69956656 |  |
| 231785_at    | NTF4            | -1,812418401 | -1,112851844 | -0,69956656 |  |
| 235858_at    | CREBBP          | -1,812418401 | -1,112851844 | -0,69956656 |  |
| 238750_at    | CCL28           | -1,812418401 | -1,112851844 | -0,69956656 |  |
| 242720_at    | ITIH4           | -0,59053611  | 0,109221392  | -0,6997575  |  |
| 203496_s_at  | MED1            | 1,829737795  | 2,529740643  | -0,70000285 |  |
| 216122_at    | -               | -1,964176657 | -1,264005341 | -0,70017132 |  |
| 220174_at    | LRRC8E          | -1,964176657 | -1,264005341 | -0,70017132 |  |
| 233479_at    | -               | -1,964176657 | -1,264005341 | -0,70017132 |  |
| 236542_at    | -               | -1,964176657 | -1,264005341 | -0,70017132 |  |
| 237688_at    | -               | -1,964176657 | -1,264005341 | -0,70017132 |  |
| 239093_at    | HOGA1           | -1,964176657 | -1,264005341 | -0,70017132 |  |
| 1559101_at   | -               | -0,543051993 | 0,157549243  | -0,70060124 |  |
| 208568_at    | MC2R            | -0,543051993 | 0,157549243  | -0,70060124 |  |
| 231351_at    | -               | -0,67289328  | 0,028364014  | -0,70125729 |  |
| 221603_at    | PEX16           | -0,496991414 | 0,204310755  | -0,70130217 |  |
| 226548_at    | SBK1            | -0,496991414 | 0,204310755  | -0,70130217 |  |
| 214439_x_at  | BIN1            | -0,221656139 | 0,479907041  | -0,70156318 |  |
| 215549_x_at  | CTAGE4 /// CTA  | 0,103263601  | 0,805216064  | -0,70195246 |  |
| 223702_x_at  | FTCD            | 0,133056859  | 0,835239052  | -0,70218219 |  |
| 228403_at    | ENHO            | -0,622910612 | 0,079428135  | -0,70233875 |  |
| 232172_at    | CD99P1          | -0,622910612 | 0,079428135  | -0,70233875 |  |
| 205910_s_at  | CEL             | -0,112808516 | 0,589657387  | -0,7024659  |  |
| 1564134_at   | -               | -3,32387526  | -2,621331989 | -0,70254327 |  |
| 1556131_s_at | FBF1            | -0,986356909 | -0,283667828 | -0,70268908 |  |
| 1559863_a_at | AFG3L1P         | -0,57445847  | 0,128747141  | -0,70320561 |  |
| 208779_x_at  | DDR1 /// MIR464 | -0,57445847  | 0,128747141  | -0,70320561 |  |
| 1562476_at   | -               | -2,866296344 | -2,162639771 | -0,70365657 |  |

|              |                 |              |              |             |  |
|--------------|-----------------|--------------|--------------|-------------|--|
| 237216_at    | -               | -2,866296344 | -2,162639771 | -0,70365657 |  |
| 232796_at    | -               | -1,026571149 | -0,322870281 | -0,70370087 |  |
| 239545_at    | -               | -1,026571149 | -0,322870281 | -0,70370087 |  |
| 1553880_at   | C10orf91        | -1,71423189  | -1,010192375 | -0,70403951 |  |
| 1559630_at   | -               | -1,71423189  | -1,010192375 | -0,70403951 |  |
| 203426_s_at  | IGFBP5          | -1,71423189  | -1,010192375 | -0,70403951 |  |
| 216482_x_at  | ZNF79           | -1,71423189  | -1,010192375 | -0,70403951 |  |
| 229688_at    | PRDM11          | -1,71423189  | -1,010192375 | -0,70403951 |  |
| 233283_at    | -               | -1,71423189  | -1,010192375 | -0,70403951 |  |
| 234337_at    | TTLL9           | -1,71423189  | -1,010192375 | -0,70403951 |  |
| 236835_at    | LOC645431       | -1,71423189  | -1,010192375 | -0,70403951 |  |
| 229574_at    | TRA2A           | 0,401366113  | 1,105412836  | -0,70404672 |  |
| 1554237_at   | SDCCAG8         | -1,240169874 | -0,536087151 | -0,70408272 |  |
| 1568594_s_at | TRIM52          | -1,240169874 | -0,536087151 | -0,70408272 |  |
| 204891_s_at  | LCK             | -1,240169874 | -0,536087151 | -0,70408272 |  |
| 206762_at    | KCNA5           | -1,240169874 | -0,536087151 | -0,70408272 |  |
| 239274_at    | -               | -0,136301282 | 0,568365095  | -0,70466638 |  |
| 238631_at    | -               | -0,43775896  | 0,26733076   | -0,70508972 |  |
| 1553057_at   | SERPINB12       | -1,470833215 | -0,765504029 | -0,70532919 |  |
| 1557225_at   | ASPG            | -1,470833215 | -0,765504029 | -0,70532919 |  |
| 1566653_at   | -               | -1,470833215 | -0,765504029 | -0,70532919 |  |
| 215180_at    | -               | -1,470833215 | -0,765504029 | -0,70532919 |  |
| 231020_at    | ARX             | -1,470833215 | -0,765504029 | -0,70532919 |  |
| 242867_x_at  | -               | -1,470833215 | -0,765504029 | -0,70532919 |  |
| 232083_at    | KIF16B          | 0,334552598  | 1,039887232  | -0,70533463 |  |
| 205941_s_at  | COL10A1         | -1,196375121 | -0,490927335 | -0,70544779 |  |
| 207336_at    | SOX5            | -1,196375121 | -0,490927335 | -0,70544779 |  |
| 221173_at    | USH1C           | -1,196375121 | -0,490927335 | -0,70544779 |  |
| 231180_at    | LOC100506591    | -1,196375121 | -0,490927335 | -0,70544779 |  |
| 229511_at    | SMARCE1         | -0,394749123 | 0,310717132  | -0,70546626 |  |
| 1564066_at   | TMEM151B        | -2,667025278 | -1,961547147 | -0,70547813 |  |
| 1566771_at   | -               | -2,667025278 | -1,961547147 | -0,70547813 |  |
| 216872_at    | HR44            | -2,667025278 | -1,961547147 | -0,70547813 |  |
| 217451_at    | -               | -2,667025278 | -1,961547147 | -0,70547813 |  |
| 224499_s_at  | AICDA           | -2,667025278 | -1,961547147 | -0,70547813 |  |
| 1557009_a_at | LOC340107       | -3,114791413 | -2,408705138 | -0,70608628 |  |
| 211124_s_at  | KITLG           | -3,114791413 | -2,408705138 | -0,70608628 |  |
| 211264_at    | GAD2            | -3,114791413 | -2,408705138 | -0,70608628 |  |
| 1556347_at   | -               | -0,926850548 | -0,220592223 | -0,70625832 |  |
| 1559635_at   | CASC4           | -0,926850548 | -0,220592223 | -0,70625832 |  |
| 208504_x_at  | PCDHB11         | -0,926850548 | -0,220592223 | -0,70625832 |  |
| 210718_s_at  | ARL17A /// ARL1 | -0,926850548 | -0,220592223 | -0,70625832 |  |
| 214065_s_at  | CIB2            | -0,926850548 | -0,220592223 | -0,70625832 |  |
| 233921_s_at  | -               | -0,926850548 | -0,220592223 | -0,70625832 |  |
| 243524_at    | -               | -0,926850548 | -0,220592223 | -0,70625832 |  |
| 1552568_at   | RTP3            | -1,353583928 | -0,646746079 | -0,70683785 |  |
| 239676_x_at  | FBRSL1 /// LOC1 | -1,353583928 | -0,646746079 | -0,70683785 |  |
| 242843_at    | -               | -1,353583928 | -0,646746079 | -0,70683785 |  |
| 238481_at    | MGP             | -3,212234735 | -2,503677622 | -0,70855711 |  |
| 1558458_at   | LOC401320       | -2,089474779 | -1,377419394 | -0,71205538 |  |
| 1563950_at   | -               | -2,089474779 | -1,377419394 | -0,71205538 |  |
| 1567031_at   | ZNF160          | -2,089474779 | -1,377419394 | -0,71205538 |  |
| 209504_s_at  | PLEKHB1         | -2,089474779 | -1,377419394 | -0,71205538 |  |
| 220636_at    | DNAI2           | -2,089474779 | -1,377419394 | -0,71205538 |  |
| 232547_at    | SRCIN1          | -2,089474779 | -1,377419394 | -0,71205538 |  |
| 207143_at    | CDK6            | 0,181384709  | 0,893473268  | -0,71208856 |  |

|              |                |              |              |             |  |
|--------------|----------------|--------------|--------------|-------------|--|
| 226983_at    | ZNF777         | 0,181384709  | 0,893473268  | -0,71208856 |  |
| 1563210_at   | -              | -1,173767127 | -0,461594427 | -0,7121727  |  |
| 207070_at    | RGR            | -1,173767127 | -0,461594427 | -0,7121727  |  |
| 236000_s_at  | -              | -1,173767127 | -0,461594427 | -0,7121727  |  |
| 240289_at    | PDLIM3         | -1,173767127 | -0,461594427 | -0,7121727  |  |
| 242129_at    | -              | -1,173767127 | -0,461594427 | -0,7121727  |  |
| 1554732_at   | LOC728175      | -1,131062212 | -0,41858459  | -0,71247762 |  |
| 205781_at    | C16orf7        | -1,131062212 | -0,41858459  | -0,71247762 |  |
| 214115_at    | VAMP5          | -1,131062212 | -0,41858459  | -0,71247762 |  |
| 220385_at    | JPH2           | -1,131062212 | -0,41858459  | -0,71247762 |  |
| 228884_at    | LRRC27         | -1,131062212 | -0,41858459  | -0,71247762 |  |
| 242119_at    | PROX1          | -1,131062212 | -0,41858459  | -0,71247762 |  |
| 1552890_a_at | CABP4          | -1,763254337 | -1,050406615 | -0,71284772 |  |
| 1554938_a_at | ACOT11         | -1,763254337 | -1,050406615 | -0,71284772 |  |
| 1557981_at   | RPS9           | -1,763254337 | -1,050406615 | -0,71284772 |  |
| 206156_at    | GJB5           | -1,763254337 | -1,050406615 | -0,71284772 |  |
| 206421_s_at  | SERPINB7       | -1,763254337 | -1,050406615 | -0,71284772 |  |
| 214966_at    | GRIK5          | -1,763254337 | -1,050406615 | -0,71284772 |  |
| 223913_s_at  | MIR7-3HG       | -1,763254337 | -1,050406615 | -0,71284772 |  |
| 236933_at    | EVPLL          | -1,763254337 | -1,050406615 | -0,71284772 |  |
| 237087_at    | -              | -1,763254337 | -1,050406615 | -0,71284772 |  |
| 241439_at    | -              | -1,763254337 | -1,050406615 | -0,71284772 |  |
| 243129_at    | LOC642980      | -1,763254337 | -1,050406615 | -0,71284772 |  |
| 235705_at    | -              | -0,759588698 | -0,046302147 | -0,71328655 |  |
| 232778_at    | -              | 0,351548291  | 1,065442793  | -0,7138945  |  |
| 231000_at    | ROR2           | -0,089689931 | 0,624460759  | -0,71415069 |  |
| 1561304_a_at | LOC100422781   | -0,196756757 | 0,51742585   | -0,71418261 |  |
| 204301_at    | KBTBD11        | -0,706943342 | 0,007421914  | -0,71436526 |  |
| 236516_at    | -              | -0,706943342 | 0,007421914  | -0,71436526 |  |
| 1559540_at   | LOC100506526   | -2,138804305 | -1,423348341 | -0,71545596 |  |
| 214599_at    | IVL            | -2,138804305 | -1,423348341 | -0,71545596 |  |
| 220738_s_at  | RPS6KA6        | -2,138804305 | -1,423348341 | -0,71545596 |  |
| 224482_s_at  | RAB11FIP4      | -2,138804305 | -1,423348341 | -0,71545596 |  |
| 236056_s_at  | 08.03.15       | -2,138804305 | -1,423348341 | -0,71545596 |  |
| 238237_at    | LOC100130964   | -2,138804305 | -1,423348341 | -0,71545596 |  |
| 242747_at    | -              | -2,138804305 | -1,423348341 | -0,71545596 |  |
| 233741_at    | FTCD           | -0,078265071 | 0,638150376  | -0,71641545 |  |
| 204078_at    | LEPREL4        | -0,512251684 | 0,204310755  | -0,71656244 |  |
| 231288_at    | CCDC88C        | -0,467091869 | 0,249604176  | -0,71669604 |  |
| 224009_x_at  | DHRS9          | -0,259832361 | 0,456918297  | -0,71675066 |  |
| 1553840_a_at | CCDC149        | -0,423248115 | 0,293518836  | -0,71676695 |  |
| 219932_at    | SLC27A6        | -0,423248115 | 0,293518836  | -0,71676695 |  |
| 206848_at    | COX20          | -0,299034815 | 0,417770464  | -0,71680528 |  |
| 215771_x_at  | RET            | -0,741668563 | -0,024572586 | -0,71709598 |  |
| 215816_at    | GUSBP11 /// GU | -0,741668563 | -0,024572586 | -0,71709598 |  |
| 1559410_at   | -              | -1,937711681 | -1,220210588 | -0,71750109 |  |
| 1564510_at   | -              | -1,937711681 | -1,220210588 | -0,71750109 |  |
| 227189_at    | CPNE5          | -1,937711681 | -1,220210588 | -0,71750109 |  |
| 231985_at    | MICAL3         | -1,937711681 | -1,220210588 | -0,71750109 |  |
| 241619_at    | CALM1 /// CALM | -1,937711681 | -1,220210588 | -0,71750109 |  |
| 242886_at    | -              | -1,937711681 | -1,220210588 | -0,71750109 |  |
| 242965_at    | -              | -1,937711681 | -1,220210588 | -0,71750109 |  |
| 1561341_at   | -              | -2,504600601 | -1,787089803 | -0,7175108  |  |
| 1566047_at   | -              | -2,504600601 | -1,787089803 | -0,7175108  |  |
| 203222_s_at  | TLE1           | -2,504600601 | -1,787089803 | -0,7175108  |  |
| 222353_at    | LIMD1          | -2,504600601 | -1,787089803 | -0,7175108  |  |



|              |              |              |              |             |  |
|--------------|--------------|--------------|--------------|-------------|--|
| 229230_at    | OSTalpha     | -2,504600601 | -1,787089803 | -0,7175108  |  |
| 237157_at    | -            | -2,504600601 | -1,787089803 | -0,7175108  |  |
| 239957_at    | -            | -2,504600601 | -1,787089803 | -0,7175108  |  |
| 229735_s_at  | NIPAL3       | -1,2845686   | -0,566887459 | -0,71768114 |  |
| 242099_at    | -            | -1,2845686   | -0,566887459 | -0,71768114 |  |
| 208149_x_at  | DDX11        | 1,348276312  | 2,066015817  | -0,71773951 |  |
| 223314_at    | TSPAN14      | 1,348276312  | 2,066015817  | -0,71773951 |  |
| 1556133_s_at | LOC100169752 | -2,756478458 | -2,037551727 | -0,71892673 |  |
| 1555146_at   | ATF2         | -2,930741289 | -2,211750327 | -0,71899096 |  |
| 237997_s_at  | -            | -2,930741289 | -2,211750327 | -0,71899096 |  |
| 242178_at    | LIPI         | -2,930741289 | -2,211750327 | -0,71899096 |  |
| 243197_at    | -            | -2,930741289 | -2,211750327 | -0,71899096 |  |
| 244223_at    | -            | -2,930741289 | -2,211750327 | -0,71899096 |  |
| 1555130_at   | PER3         | -3,054236653 | -2,335104118 | -0,71913253 |  |
| 206639_x_at  | HTN1         | -3,054236653 | -2,335104118 | -0,71913253 |  |
| 210997_at    | HGF          | -3,054236653 | -2,335104118 | -0,71913253 |  |
| 236495_at    | -            | -3,054236653 | -2,335104118 | -0,71913253 |  |
| 241809_at    | FAM212B      | 0,95671774   | 1,675891488  | -0,71917375 |  |
| 216458_at    | PQLC3        | -0,285837228 | 0,433557298  | -0,71939453 |  |
| 223340_at    | ATL1         | -0,543051993 | 0,176436073  | -0,71948807 |  |
| 235920_at    | -            | -0,543051993 | 0,176436073  | -0,71948807 |  |
| 1557889_at   | -            | -0,496991414 | 0,222599095  | -0,71959051 |  |
| 1565549_at   | -            | -1,399512875 | -0,679763839 | -0,71974904 |  |
| 1566761_a_at | FLJ34208     | -1,399512875 | -0,679763839 | -0,71974904 |  |
| 213922_at    | TTBK2        | -1,399512875 | -0,679763839 | -0,71974904 |  |
| 214460_at    | LSAMP        | -1,399512875 | -0,679763839 | -0,71974904 |  |
| 222166_at    | C9orf16      | -1,399512875 | -0,679763839 | -0,71974904 |  |
| 244437_at    | -            | -1,399512875 | -0,679763839 | -0,71974904 |  |
| 1553319_at   | OXGR1        | -2,262747984 | -1,541908042 | -0,72083994 |  |
| 1561262_at   | -            | -2,262747984 | -1,541908042 | -0,72083994 |  |
| 1563397_at   | -            | -2,262747984 | -1,541908042 | -0,72083994 |  |
| 1566276_at   | -            | -2,262747984 | -1,541908042 | -0,72083994 |  |
| 210282_at    | ZMYM2        | -2,262747984 | -1,541908042 | -0,72083994 |  |
| 219859_at    | CLEC4E       | -2,262747984 | -1,541908042 | -0,72083994 |  |
| 223876_at    | SPATA16      | -2,262747984 | -1,541908042 | -0,72083994 |  |
| 233493_at    | OR2A4        | -2,262747984 | -1,541908042 | -0,72083994 |  |
| 238942_at    | -            | -2,262747984 | -1,541908042 | -0,72083994 |  |
| 241106_at    | -            | -2,262747984 | -1,541908042 | -0,72083994 |  |
| 1553533_at   | JPH1         | -2,384869671 | -1,663414495 | -0,72145518 |  |
| 1557432_at   | RASAL2       | -2,384869671 | -1,663414495 | -0,72145518 |  |
| 1562163_at   | -            | -2,384869671 | -1,663414495 | -0,72145518 |  |
| 1563346_at   | C21orf91-OT1 | -2,384869671 | -1,663414495 | -0,72145518 |  |
| 205837_s_at  | GYPA         | -2,384869671 | -1,663414495 | -0,72145518 |  |
| 216217_at    | PLCL2        | -2,384869671 | -1,663414495 | -0,72145518 |  |
| 222121_at    | ARHGEF26     | -2,384869671 | -1,663414495 | -0,72145518 |  |
| 232678_at    | -            | -2,384869671 | -1,663414495 | -0,72145518 |  |
| 244626_at    | -            | -2,384869671 | -1,663414495 | -0,72145518 |  |
| 232685_at    | -            | 0,083054335  | 0,805216064  | -0,72216173 |  |
| 219085_s_at  | GEMIN7       | -1,543331864 | -0,819238336 | -0,72409353 |  |
| 230902_at    | -            | -1,543331864 | -0,819238336 | -0,72409353 |  |
| 231256_at    | LOC727944    | -1,543331864 | -0,819238336 | -0,72409353 |  |
| 240888_at    | -            | -1,543331864 | -0,819238336 | -0,72409353 |  |
| 242041_at    | CSPP1        | -1,543331864 | -0,819238336 | -0,72409353 |  |
| 242765_at    | MOBP         | -1,543331864 | -0,819238336 | -0,72409353 |  |
| 231199_at    | -            | -1,047650486 | -0,322870281 | -0,7247802  |  |
| 238383_at    | C6orf58      | -1,047650486 | -0,322870281 | -0,7247802  |  |

|              |                |              |              |             |  |
|--------------|----------------|--------------|--------------|-------------|--|
| 227924_at    | INO80D         | -0,00073712  | 0,724100169  | -0,72483729 |  |
| 226198_at    | TOM1L2         | 0,555999837  | 1,281471383  | -0,72547155 |  |
| 1562383_at   | MIR4313        | -1,838812296 | -1,112851844 | -0,72596045 |  |
| 220533_at    | -              | -1,838812296 | -1,112851844 | -0,72596045 |  |
| 229109_s_at  | BLVRA          | -1,838812296 | -1,112851844 | -0,72596045 |  |
| 233311_at    | LOC145845      | -1,838812296 | -1,112851844 | -0,72596045 |  |
| 239698_at    | -              | -1,838812296 | -1,112851844 | -0,72596045 |  |
| 241286_at    | LOC100506758   | -1,838812296 | -1,112851844 | -0,72596045 |  |
| 244035_at    | -              | -1,838812296 | -1,112851844 | -0,72596045 |  |
| 244717_x_at  | SV2B           | -1,838812296 | -1,112851844 | -0,72596045 |  |
| 233690_at    | -              | 1,153678675  | 1,879785595  | -0,72610692 |  |
| 1564154_at   | -              | -0,946847173 | -0,220592223 | -0,72625495 |  |
| 205469_s_at  | IRF5           | -0,172274514 | 0,553993624  | -0,72626814 |  |
| 228726_at    | SERPINB1       | 1,799091453  | 2,526063925  | -0,72697247 |  |
| 1568606_at   | C11orf88       | -3,013665402 | -2,286583451 | -0,72708195 |  |
| 1560259_at   | -              | -0,022466681 | 0,704715219  | -0,7271819  |  |
| 1553475_at   | PRO1483        | -1,639579028 | -0,912331589 | -0,72724744 |  |
| 1556951_at   | -              | -1,639579028 | -0,912331589 | -0,72724744 |  |
| 201495_x_at  | MYH11          | -1,639579028 | -0,912331589 | -0,72724744 |  |
| 230417_at    | GALNTL1        | -1,639579028 | -0,912331589 | -0,72724744 |  |
| 230716_at    | LOC100507203   | -1,639579028 | -0,912331589 | -0,72724744 |  |
| 233908_x_at  | -              | -1,639579028 | -0,912331589 | -0,72724744 |  |
| 235305_s_at  | ECHDC2         | -1,639579028 | -0,912331589 | -0,72724744 |  |
| 242168_at    | NDUFS7         | -1,639579028 | -0,912331589 | -0,72724744 |  |
| 244618_at    | -              | -1,639579028 | -0,912331589 | -0,72724744 |  |
| 202071_at    | SDC4           | -0,055687482 | 0,67181667   | -0,72750415 |  |
| 1552347_at   | CRYZL1         | 1,05337236   | 1,781437557  | -0,7280652  |  |
| 1558619_at   | SNORA43        | -0,986356909 | -0,258114234 | -0,72824268 |  |
| 230011_at    | MEI1           | -0,986356909 | -0,258114234 | -0,72824268 |  |
| 213339_at    | TP73-AS1       | -0,888496123 | -0,160136748 | -0,72835937 |  |
| 243600_at    | TPGS1          | -0,888496123 | -0,160136748 | -0,72835937 |  |
| 1560609_at   | CRYZL1         | -2,64318869  | -1,912089812 | -0,73109888 |  |
| 1560771_at   | -              | -2,64318869  | -1,912089812 | -0,73109888 |  |
| 1561026_a_at | -              | -2,64318869  | -1,912089812 | -0,73109888 |  |
| 1563109_at   | -              | -2,64318869  | -1,912089812 | -0,73109888 |  |
| 1566740_at   | PLCE1          | -2,64318869  | -1,912089812 | -0,73109888 |  |
| 206852_at    | EPHA7          | -2,64318869  | -1,912089812 | -0,73109888 |  |
| 211371_at    | MAP2K5         | -2,64318869  | -1,912089812 | -0,73109888 |  |
| 216353_s_at  | -              | -2,64318869  | -1,912089812 | -0,73109888 |  |
| 237147_at    | -              | -2,64318869  | -1,912089812 | -0,73109888 |  |
| 239344_at    | -              | -2,64318869  | -1,912089812 | -0,73109888 |  |
| 1568957_x_at | SRGAP2 /// SRG | -2,063149277 | -1,332017329 | -0,73113195 |  |
| 204890_s_at  | LCK            | -2,063149277 | -1,332017329 | -0,73113195 |  |
| 211832_s_at  | MDM2           | -2,063149277 | -1,332017329 | -0,73113195 |  |
| 231156_at    | -              | -2,063149277 | -1,332017329 | -0,73113195 |  |
| 232246_at    | TTC28-AS1      | -2,063149277 | -1,332017329 | -0,73113195 |  |
| 237326_at    | LINC00310      | -2,063149277 | -1,332017329 | -0,73113195 |  |
| 239163_at    | UBE2B          | -2,063149277 | -1,332017329 | -0,73113195 |  |
| 210127_at    | RAB6B          | -0,67289328  | 0,059218869  | -0,73211215 |  |
| 215508_at    | BUB1           | -0,622910612 | 0,109221392  | -0,732132   |  |
| 1553655_at   | CDC20B         | -1,888254346 | -1,154897679 | -0,73335667 |  |
| 1554405_a_at | LINC00161      | -1,888254346 | -1,154897679 | -0,73335667 |  |
| 1558365_at   | LOC100652805 / | -1,888254346 | -1,154897679 | -0,73335667 |  |
| 225957_at    | CREBRF         | -1,888254346 | -1,154897679 | -0,73335667 |  |
| 230275_at    | ARSI           | -1,888254346 | -1,154897679 | -0,73335667 |  |
| 234253_at    | -              | -1,888254346 | -1,154897679 | -0,73335667 |  |

|              |              |              |              |             |  |
|--------------|--------------|--------------|--------------|-------------|--|
| 241661_at    | JMJD1C       | -1,888254346 | -1,154897679 | -0,73335667 |  |
| 222814_s_at  | ZNHIT2       | -0,423248115 | 0,310717132  | -0,73396525 |  |
| 235224_s_at  | CAND1        | -0,423248115 | 0,310717132  | -0,73396525 |  |
| 235730_at    | -            | -0,423248115 | 0,310717132  | -0,73396525 |  |
| 228805_at    | C5orf25      | 1,960118853  | 2,694398145  | -0,73427929 |  |
| 202821_s_at  | LPP          | -0,467091869 | 0,26733076   | -0,73442263 |  |
| 235581_at    | -            | 0,052199481  | 0,786897721  | -0,73469824 |  |
| 1565016_at   | PRMT1        | -1,196375121 | -0,461594427 | -0,73478069 |  |
| 1569127_at   | -            | -1,196375121 | -0,461594427 | -0,73478069 |  |
| 1569666_s_at | -            | -1,196375121 | -0,461594427 | -0,73478069 |  |
| 207498_s_at  | CYP2D6       | -1,196375121 | -0,461594427 | -0,73478069 |  |
| 1560803_at   | DNAH3        | -2,597496523 | -1,862647763 | -0,73484876 |  |
| 202965_s_at  | CAPN6        | -2,597496523 | -1,862647763 | -0,73484876 |  |
| 226653_at    | MARK1        | -2,597496523 | -1,862647763 | -0,73484876 |  |
| 237061_at    | ZNF347       | -2,597496523 | -1,862647763 | -0,73484876 |  |
| 243572_at    | -            | -2,597496523 | -1,862647763 | -0,73484876 |  |
| 1565762_at   | -            | -0,512251684 | 0,222599095  | -0,73485078 |  |
| 221710_x_at  | FAM176B      | -0,512251684 | 0,222599095  | -0,73485078 |  |
| 229901_at    | ZNF488       | -0,512251684 | 0,222599095  | -0,73485078 |  |
| 1558850_s_at | LOC284276    | -0,759588698 | -0,024572586 | -0,73501611 |  |
| 1560908_at   | -            | -0,759588698 | -0,024572586 | -0,73501611 |  |
| 216848_at    | -            | -0,759588698 | -0,024572586 | -0,73501611 |  |
| 1564385_at   | LOC219688    | -0,706943342 | 0,028364014  | -0,73530736 |  |
| 227564_at    | HGSNAT       | -0,706943342 | 0,028364014  | -0,73530736 |  |
| 216608_at    | DKFZP434A062 | -0,655928373 | 0,079428135  | -0,73535651 |  |
| 1554974_at   | ACY3         | -1,591296941 | -0,855751026 | -0,73554592 |  |
| 1558996_at   | FOXP1        | -1,591296941 | -0,855751026 | -0,73554592 |  |
| 202445_s_at  | NOTCH2       | -1,591296941 | -0,855751026 | -0,73554592 |  |
| 215255_at    | IGSF9B       | -1,591296941 | -0,855751026 | -0,73554592 |  |
| 216937_s_at  | RS1          | -1,591296941 | -0,855751026 | -0,73554592 |  |
| 220188_at    | JPH3         | -1,591296941 | -0,855751026 | -0,73554592 |  |
| 236857_at    | SLC38A1      | -1,591296941 | -0,855751026 | -0,73554592 |  |
| 237092_at    | -            | -1,591296941 | -0,855751026 | -0,73554592 |  |
| 1559128_at   | HSDL2        | -3,192553003 | -2,456406426 | -0,73614658 |  |
| 1559072_a_at | ELFN2        | -2,823166348 | -2,086984744 | -0,7361816  |  |
| 1569542_at   | -            | -2,823166348 | -2,086984744 | -0,7361816  |  |
| 217316_at    | OR7A10       | -2,823166348 | -2,086984744 | -0,7361816  |  |
| 217386_at    | -            | -2,823166348 | -2,086984744 | -0,7361816  |  |
| 242333_at    | -            | -2,823166348 | -2,086984744 | -0,7361816  |  |
| 1555546_a_at | POFUT2       | -0,078265071 | 0,658444279  | -0,73670935 |  |
| 224912_at    | TTC7A        | -0,112808516 | 0,624460759  | -0,73726928 |  |
| 1557771_at   | FHAD1        | -1,688127507 | -0,950686014 | -0,73744149 |  |
| 1560463_at   | LOC283788    | -1,688127507 | -0,950686014 | -0,73744149 |  |
| 1561905_at   | -            | -1,688127507 | -0,950686014 | -0,73744149 |  |
| 221266_s_at  | DCSTAMP      | -1,688127507 | -0,950686014 | -0,73744149 |  |
| 229020_x_at  | EPS8L2       | -1,688127507 | -0,950686014 | -0,73744149 |  |
| 231450_at    | -            | -1,688127507 | -0,950686014 | -0,73744149 |  |
| 234605_at    | CDC14B       | -1,688127507 | -0,950686014 | -0,73744149 |  |
| 237399_at    | -            | -1,688127507 | -0,950686014 | -0,73744149 |  |
| 238849_at    | ACY1         | -1,688127507 | -0,950686014 | -0,73744149 |  |
| 224237_at    | -            | -0,221656139 | 0,51742585   | -0,73908199 |  |
| 203922_s_at  | CYBB         | -1,353583928 | -0,614371577 | -0,73921235 |  |
| 223919_at    | TP53AIP1     | -1,353583928 | -0,614371577 | -0,73921235 |  |
| 215818_at    | NUDT7        | -1,089016378 | -0,34958478  | -0,7394316  |  |
| 224164_at    | TPM3         | -1,089016378 | -0,34958478  | -0,7394316  |  |
| 231198_at    | CDK6         | -1,089016378 | -0,34958478  | -0,7394316  |  |

|              |                 |              |              |             |  |
|--------------|-----------------|--------------|--------------|-------------|--|
| 238723_at    | ATXN3           | -1,089016378 | -0,34958478  | -0,7394316  |  |
| 1559790_at   | LOC646241       | -3,07502285  | -2,335104118 | -0,73991873 |  |
| 220983_s_at  | LOC100653017 /  | -3,07502285  | -2,335104118 | -0,73991873 |  |
| 234758_at    | -               | -3,07502285  | -2,335104118 | -0,73991873 |  |
| 234305_s_at  | GSDMC           | -0,136301282 | 0,603679647  | -0,73998093 |  |
| 231237_x_at  | -               | -1,470833215 | -0,730778808 | -0,74005441 |  |
| 234397_at    | -               | -1,470833215 | -0,730778808 | -0,74005441 |  |
| 240666_at    | -               | -1,470833215 | -0,730778808 | -0,74005441 |  |
| 240925_at    | -               | -1,470833215 | -0,730778808 | -0,74005441 |  |
| 244863_at    | SH3GLB2         | -1,470833215 | -0,730778808 | -0,74005441 |  |
| 211076_x_at  | ATN1            | -1,131062212 | -0,39061235  | -0,74044986 |  |
| 233698_at    | -               | -1,131062212 | -0,39061235  | -0,74044986 |  |
| 240648_at    | -               | -1,131062212 | -0,39061235  | -0,74044986 |  |
| 241776_at    | -               | 0,152582607  | 0,893473268  | -0,74089066 |  |
| 1555935_s_at | HUNK            | -1,308181863 | -0,566887459 | -0,7412944  |  |
| 1569446_x_at | LOC100287576 /  | -1,308181863 | -0,566887459 | -0,7412944  |  |
| 210081_at    | AGER            | -1,308181863 | -0,566887459 | -0,7412944  |  |
| 220325_at    | TAF7L           | -1,308181863 | -0,566887459 | -0,7412944  |  |
| 1553637_s_at | TMCO5A          | -2,479842156 | -1,738067356 | -0,7417748  |  |
| 1560900_a_at | -               | -2,479842156 | -1,738067356 | -0,7417748  |  |
| 1563070_at   | -               | -2,479842156 | -1,738067356 | -0,7417748  |  |
| 211128_at    | EDA             | -2,479842156 | -1,738067356 | -0,7417748  |  |
| 221084_at    | HTR3B           | -2,479842156 | -1,738067356 | -0,7417748  |  |
| 230784_at    | PRAC            | -2,479842156 | -1,738067356 | -0,7417748  |  |
| 233099_at    | -               | -2,479842156 | -1,738067356 | -0,7417748  |  |
| 235726_at    | ZBTB10          | -2,479842156 | -1,738067356 | -0,7417748  |  |
| 203296_s_at  | ATP1A2          | -2,779459409 | -2,037551727 | -0,74190768 |  |
| 210911_at    | ID2B            | -2,779459409 | -2,037551727 | -0,74190768 |  |
| 1567704_at   | TFE3            | -2,236765673 | -1,494668682 | -0,74209699 |  |
| 215524_x_at  | MGC40069 /// TR | -2,236765673 | -1,494668682 | -0,74209699 |  |
| 219181_at    | LIPG            | -2,236765673 | -1,494668682 | -0,74209699 |  |
| 229310_at    | KLHL29          | -2,236765673 | -1,494668682 | -0,74209699 |  |
| 232810_at    | AIG1            | -2,236765673 | -1,494668682 | -0,74209699 |  |
| 234218_at    | -               | -2,236765673 | -1,494668682 | -0,74209699 |  |
| 236461_at    | ABHD1           | -2,236765673 | -1,494668682 | -0,74209699 |  |
| 237781_at    | HORMAD2         | -2,236765673 | -1,494668682 | -0,74209699 |  |
| 238357_at    | -               | -2,236765673 | -1,494668682 | -0,74209699 |  |
| 1569434_at   | C14orf105       | -1,026571149 | -0,283667828 | -0,74290332 |  |
| 205616_at    | GALNT8 /// KCN  | -1,026571149 | -0,283667828 | -0,74290332 |  |
| 244166_at    | -               | -1,026571149 | -0,283667828 | -0,74290332 |  |
| 1552757_s_at | C9orf66         | -1,964176657 | -1,220210588 | -0,74396607 |  |
| 1556114_a_at | DKFZp451A211    | -1,964176657 | -1,220210588 | -0,74396607 |  |
| 1570255_s_at | ANKRD20A1 /// A | -1,964176657 | -1,220210588 | -0,74396607 |  |
| 215020_at    | NRXN3           | -1,964176657 | -1,220210588 | -0,74396607 |  |
| 231529_at    | -               | -1,964176657 | -1,220210588 | -0,74396607 |  |
| 235802_at    | PLD4            | -1,964176657 | -1,220210588 | -0,74396607 |  |
| 242597_at    | ZMYM2           | -1,964176657 | -1,220210588 | -0,74396607 |  |
| 243114_at    | -               | -1,964176657 | -1,220210588 | -0,74396607 |  |
| 1562888_at   | GLB1L3          | -1,424023738 | -0,679763839 | -0,7442599  |  |
| 1570138_at   | -               | -1,424023738 | -0,679763839 | -0,7442599  |  |
| 210165_at    | DNASE1          | -1,424023738 | -0,679763839 | -0,7442599  |  |
| 234781_at    | -               | -1,424023738 | -0,679763839 | -0,7442599  |  |
| 237285_at    | SORBS2          | -1,424023738 | -0,679763839 | -0,7442599  |  |
| 237742_at    | -               | -1,424023738 | -0,679763839 | -0,7442599  |  |
| 239141_at    | LOC100126784    | -1,424023738 | -0,679763839 | -0,7442599  |  |
| 1558527_at   | LOC100132707    | -2,359436556 | -1,615132408 | -0,74430415 |  |

|              |                 |              |              |             |  |
|--------------|-----------------|--------------|--------------|-------------|--|
| 1562812_at   | ZNF32-AS3       | -2,359436556 | -1,615132408 | -0,74430415 |  |
| 1563728_at   | LINC00032       | -2,359436556 | -1,615132408 | -0,74430415 |  |
| 1566222_at   | -               | -2,359436556 | -1,615132408 | -0,74430415 |  |
| 221721_s_at  | LZTS1           | -2,359436556 | -1,615132408 | -0,74430415 |  |
| 222356_at    | -               | -2,359436556 | -1,615132408 | -0,74430415 |  |
| 233408_at    | PREX2           | -2,359436556 | -1,615132408 | -0,74430415 |  |
| 235166_at    | ZNF148          | -2,359436556 | -1,615132408 | -0,74430415 |  |
| 224506_s_at  | PPAPDC3         | -0,366776884 | 0,377530647  | -0,74430753 |  |
| 233595_at    | USP34           | 1,274448124  | 2,019703483  | -0,74525536 |  |
| 1563371_at   | -               | -3,15396682  | -2,408705138 | -0,74526168 |  |
| 1569947_at   | -               | -3,15396682  | -2,408705138 | -0,74526168 |  |
| 1555229_a_at | C1S             | -2,908843709 | -2,162639771 | -0,74620394 |  |
| 1559500_at   | LOC100505729 /  | -2,908843709 | -2,162639771 | -0,74620394 |  |
| 1565910_at   | FSTL4           | -2,908843709 | -2,162639771 | -0,74620394 |  |
| 220301_at    | CCDC102B        | -2,908843709 | -2,162639771 | -0,74620394 |  |
| 228438_at    | LOC100132891    | -2,908843709 | -2,162639771 | -0,74620394 |  |
| 229387_at    | LRCH3           | -2,908843709 | -2,162639771 | -0,74620394 |  |
| 239618_at    | SEC16B          | -3,250025915 | -2,503677622 | -0,74634829 |  |
| 233323_at    | -               | -0,022466681 | 0,724100169  | -0,74656685 |  |
| 235862_at    | -               | -0,496991414 | 0,249604176  | -0,74659559 |  |
| 217191_x_at  | -               | 0,928678725  | 1,675891488  | -0,74721276 |  |
| 210265_x_at  | POU5F1P3        | -0,543051993 | 0,204310755  | -0,74736275 |  |
| 243462_s_at  | -               | -0,543051993 | 0,204310755  | -0,74736275 |  |
| 228623_at    | -               | 0,682279745  | 1,43051703   | -0,74823728 |  |
| 235479_at    | CPEB2           | -1,2845686   | -0,536087151 | -0,74848145 |  |
| 1554481_a_at | EPB41           | 0,228146222  | 0,976641161  | -0,74849494 |  |
| 1553590_at   | FAM27E1 /// FAM | -0,85085127  | -0,102100538 | -0,74875073 |  |
| 204943_at    | ADAM12          | -0,85085127  | -0,102100538 | -0,74875073 |  |
| 238171_at    | SLC25A30        | -0,85085127  | -0,102100538 | -0,74875073 |  |
| 237199_at    | -               | -0,741668563 | 0,007421914  | -0,74909048 |  |
| 240501_at    | -               | -0,741668563 | 0,007421914  | -0,74909048 |  |
| 242270_at    | -               | -0,79540287  | -0,046302147 | -0,74910072 |  |
| 1564537_a_at | ASB10           | -2,01371626  | -1,264005341 | -0,74971092 |  |
| 208314_at    | RRH             | -2,01371626  | -1,264005341 | -0,74971092 |  |
| 237460_x_at  | C14orf182       | -2,01371626  | -1,264005341 | -0,74971092 |  |
| 241019_at    | -               | -2,01371626  | -1,264005341 | -0,74971092 |  |
| 1554717_a_at | PDE4D           | -2,712026959 | -1,961547147 | -0,75047981 |  |
| 1566158_at   | -               | -2,712026959 | -1,961547147 | -0,75047981 |  |
| 214044_at    | RYSR2           | -2,712026959 | -1,961547147 | -0,75047981 |  |
| 228770_at    | GPR146 /// LOC1 | -2,712026959 | -1,961547147 | -0,75047981 |  |
| 232572_at    | PCA3            | -2,712026959 | -1,961547147 | -0,75047981 |  |
| 236205_at    | ABCC6P1         | -2,712026959 | -1,961547147 | -0,75047981 |  |
| 239379_at    | -               | -0,946847173 | -0,19610998  | -0,75073719 |  |
| 223690_at    | LTBP2           | -0,57445847  | 0,176436073  | -0,75089454 |  |
| 237085_x_at  | -               | 0,606430281  | 1,3579181    | -0,75148782 |  |
| 204673_at    | MUC2            | -0,622910612 | 0,128747141  | -0,75165775 |  |
| 221295_at    | CIDEA           | -0,622910612 | 0,128747141  | -0,75165775 |  |
| 244029_at    | LOC100131043    | -0,622910612 | 0,128747141  | -0,75165775 |  |
| 1557330_at   | -               | -0,888496123 | -0,136643983 | -0,75185214 |  |
| 216912_at    | ARHGEF4         | -0,888496123 | -0,136643983 | -0,75185214 |  |
| 1561942_x_at | ERVK13-1        | -0,67289328  | 0,079428135  | -0,75232142 |  |
| 238194_at    | DGKK            | -0,67289328  | 0,079428135  | -0,75232142 |  |
| 230437_s_at  | PRKCB           | -0,83191556  | -0,079522948 | -0,75239261 |  |
| 241843_at    | EIF5 /// SNORA2 | -0,83191556  | -0,079522948 | -0,75239261 |  |
| 1552258_at   | LINC00152       | -1,518072576 | -0,765504029 | -0,75256855 |  |
| 1556721_at   | C20orf203       | -1,518072576 | -0,765504029 | -0,75256855 |  |

|              |                   |              |              |             |  |
|--------------|-------------------|--------------|--------------|-------------|--|
| 220801_s_at  | HAO2              | -1,518072576 | -0,765504029 | -0,75256855 |  |
| 223885_at    | CALN1             | -1,518072576 | -0,765504029 | -0,75256855 |  |
| 229458_s_at  | GALK1             | -1,518072576 | -0,765504029 | -0,75256855 |  |
| 231671_at    | FGA               | -1,518072576 | -0,765504029 | -0,75256855 |  |
| 236473_at    | CC2D2A            | -1,518072576 | -0,765504029 | -0,75256855 |  |
| 237968_at    | ATL2              | -1,518072576 | -0,765504029 | -0,75256855 |  |
| 205503_at    | PTPN14            | -1,399512875 | -0,646746079 | -0,7527668  |  |
| 237425_at    | LOC100505890      | -1,399512875 | -0,646746079 | -0,7527668  |  |
| 242280_x_at  | CPEB4             | -1,399512875 | -0,646746079 | -0,7527668  |  |
| 1553828_at   | NXPE1             | -1,763254337 | -1,010192375 | -0,75306196 |  |
| 211199_s_at  | ICOSLG            | -1,763254337 | -1,010192375 | -0,75306196 |  |
| 214836_x_at  | IGK@ /// IGKC /// | -1,763254337 | -1,010192375 | -0,75306196 |  |
| 228383_at    | PNPLA7            | -1,763254337 | -1,010192375 | -0,75306196 |  |
| 228720_at    | SORCS2            | -1,763254337 | -1,010192375 | -0,75306196 |  |
| 234477_at    | IGHA1 /// IGHV4-  | -1,763254337 | -1,010192375 | -0,75306196 |  |
| 242306_at    | -                 | -1,763254337 | -1,010192375 | -0,75306196 |  |
| 244236_at    | -                 | -1,763254337 | -1,010192375 | -0,75306196 |  |
| 244816_at    | -                 | -1,763254337 | -1,010192375 | -0,75306196 |  |
| 1553428_at   | LY86-AS1          | -2,667025278 | -1,912089812 | -0,75493547 |  |
| 207259_at    | LINC00483         | -2,667025278 | -1,912089812 | -0,75493547 |  |
| 210809_s_at  | POSTN             | -2,667025278 | -1,912089812 | -0,75493547 |  |
| 231636_s_at  | -                 | -2,667025278 | -1,912089812 | -0,75493547 |  |
| 1557528_at   | STRADA            | -1,173767127 | -0,41858459  | -0,75518254 |  |
| 1559916_a_at | -                 | -1,173767127 | -0,41858459  | -0,75518254 |  |
| 215727_x_at  | -                 | -1,173767127 | -0,41858459  | -0,75518254 |  |
| 241015_at    | -                 | -1,173767127 | -0,41858459  | -0,75518254 |  |
| 242962_at    | -                 | -1,173767127 | -0,41858459  | -0,75518254 |  |
| 208234_x_at  | FGFR2             | -0,299034815 | 0,456918297  | -0,75595311 |  |
| 1565662_at   | -                 | -2,089474779 | -1,332017329 | -0,75745745 |  |
| 1570123_at   | -                 | -2,089474779 | -1,332017329 | -0,75745745 |  |
| 206633_at    | CHRNA1            | -2,089474779 | -1,332017329 | -0,75745745 |  |
| 211649_x_at  | IGHA1 /// IGHG1   | -2,089474779 | -1,332017329 | -0,75745745 |  |
| 214852_x_at  | VPS13A            | -2,089474779 | -1,332017329 | -0,75745745 |  |
| 240524_x_at  | -                 | -2,089474779 | -1,332017329 | -0,75745745 |  |
| 242754_at    | -                 | -2,089474779 | -1,332017329 | -0,75745745 |  |
| 243039_at    | -                 | -2,089474779 | -1,332017329 | -0,75745745 |  |
| 243674_at    | -                 | -2,089474779 | -1,332017329 | -0,75745745 |  |
| 220969_s_at  | -                 | 1,05337236   | 1,811954245  | -0,75858188 |  |
| 215373_x_at  | -                 | 1,659347917  | 2,419116683  | -0,75976877 |  |
| 239410_at    | -                 | -0,055687482 | 0,704715219  | -0,7604027  |  |
| 1558000_at   | ARID5B            | -2,972500237 | -2,211750327 | -0,76074991 |  |
| 1562790_at   | NCALD             | -2,972500237 | -2,211750327 | -0,76074991 |  |
| 227300_at    | TMEM119           | -2,972500237 | -2,211750327 | -0,76074991 |  |
| 238139_at    | -                 | -2,972500237 | -2,211750327 | -0,76074991 |  |
| 1552730_at   | DHH               | -2,138804305 | -1,377419394 | -0,76138491 |  |
| 202341_s_at  | TRIM2             | -2,138804305 | -1,377419394 | -0,76138491 |  |
| 203559_s_at  | ABP1              | -2,138804305 | -1,377419394 | -0,76138491 |  |
| 205373_at    | CTNNA2            | -2,138804305 | -1,377419394 | -0,76138491 |  |
| 209749_s_at  | ACE               | -2,138804305 | -1,377419394 | -0,76138491 |  |
| 210181_s_at  | CABP1             | -2,138804305 | -1,377419394 | -0,76138491 |  |
| 242255_at    | WDR37             | -2,138804305 | -1,377419394 | -0,76138491 |  |
| 1558440_at   | LOC100506351      | -1,812418401 | -1,050406615 | -0,76201179 |  |
| 1569274_at   | -                 | -1,812418401 | -1,050406615 | -0,76201179 |  |
| 203808_at    | -                 | -1,812418401 | -1,050406615 | -0,76201179 |  |
| 210166_at    | TLR5              | -1,812418401 | -1,050406615 | -0,76201179 |  |
| 215431_at    | SNTB1             | -1,812418401 | -1,050406615 | -0,76201179 |  |

|              |                  |              |              |             |  |
|--------------|------------------|--------------|--------------|-------------|--|
| 240487_at    | -                | -1,812418401 | -1,050406615 | -0,76201179 |  |
| 243248_at    | -                | -1,812418401 | -1,050406615 | -0,76201179 |  |
| 244628_at    | -                | -1,812418401 | -1,050406615 | -0,76201179 |  |
| 201715_s_at  | ACIN1            | 1,748661581  | 2,511262629  | -0,76260105 |  |
| 217447_at    | MAG              | -1,71423189  | -0,950686014 | -0,76354588 |  |
| 221209_s_at  | OTOR             | -1,71423189  | -0,950686014 | -0,76354588 |  |
| 223030_at    | TRAF7            | -1,71423189  | -0,950686014 | -0,76354588 |  |
| 230418_s_at  | GALNTL1          | -1,71423189  | -0,950686014 | -0,76354588 |  |
| 239867_at    | -                | -1,71423189  | -0,950686014 | -0,76354588 |  |
| 243545_at    | -                | -1,71423189  | -0,950686014 | -0,76354588 |  |
| 1556923_at   | -                | -1,047650486 | -0,283667828 | -0,76398266 |  |
| 226878_at    | HLA-DOA          | -1,047650486 | -0,283667828 | -0,76398266 |  |
| 1563958_at   | -                | -2,551294263 | -1,787089803 | -0,76420446 |  |
| 210176_at    | TLR1             | -2,551294263 | -1,787089803 | -0,76420446 |  |
| 213849_s_at  | PPP2R2B          | -2,551294263 | -1,787089803 | -0,76420446 |  |
| 216279_at    | ZNF460           | -2,551294263 | -1,787089803 | -0,76420446 |  |
| 216683_at    | -                | -2,551294263 | -1,787089803 | -0,76420446 |  |
| 229774_at    | CXXC4            | -2,551294263 | -1,787089803 | -0,76420446 |  |
| 242096_at    | -                | -2,551294263 | -1,787089803 | -0,76420446 |  |
| 1552954_at   | C5orf17          | -2,187914861 | -1,423348341 | -0,76456652 |  |
| 1564378_a_at | -                | -2,187914861 | -1,423348341 | -0,76456652 |  |
| 230538_at    | SHC4             | -2,187914861 | -1,423348341 | -0,76456652 |  |
| 239952_at    | ZEB1             | -2,187914861 | -1,423348341 | -0,76456652 |  |
| 233108_at    | -                | -0,196756757 | 0,568365095  | -0,76512185 |  |
| 241644_at    | BOLA2            | -0,655928373 | 0,109221392  | -0,76514977 |  |
| 1558423_at   | LINC00265 /// LC | -0,986356909 | -0,220592223 | -0,76576469 |  |
| 1558984_at   | MAP3K11          | -0,986356909 | -0,220592223 | -0,76576469 |  |
| 1567027_at   | SH3GL1P2         | -0,986356909 | -0,220592223 | -0,76576469 |  |
| 239861_at    | -                | -0,986356909 | -0,220592223 | -0,76576469 |  |
| 240450_at    | -                | -0,986356909 | -0,220592223 | -0,76576469 |  |
| 233263_at    | -                | -1,089016378 | -0,322870281 | -0,7661461  |  |
| 1558839_at   | MAPKBP1          | -0,706943342 | 0,059218869  | -0,76616221 |  |
| 232199_at    | -                | -0,706943342 | 0,059218869  | -0,76616221 |  |
| 237108_x_at  | FLJ42875         | 0,457392764  | 1,223626587  | -0,76623382 |  |
| 227065_at    | RNF216           | 1,292162421  | 2,058399602  | -0,76623718 |  |
| 220028_at    | ACVR2B           | -0,234278768 | 0,532164371  | -0,76644314 |  |
| 1560952_at   | -                | -2,504600601 | -1,738067356 | -0,76653325 |  |
| 1563263_at   | -                | -2,504600601 | -1,738067356 | -0,76653325 |  |
| 215871_at    | PLA2G5           | -2,504600601 | -1,738067356 | -0,76653325 |  |
| 216720_at    | CYP2U1           | -2,504600601 | -1,738067356 | -0,76653325 |  |
| 225871_at    | STEAP2           | -2,504600601 | -1,738067356 | -0,76653325 |  |
| 237295_at    | -                | -2,504600601 | -1,738067356 | -0,76653325 |  |
| 238279_x_at  | -                | -2,504600601 | -1,738067356 | -0,76653325 |  |
| 240195_at    | -                | -2,504600601 | -1,738067356 | -0,76653325 |  |
| 1569419_at   | -                | -0,926850548 | -0,160136748 | -0,7667138  |  |
| 208164_s_at  | IL9R             | -0,926850548 | -0,160136748 | -0,7667138  |  |
| 236686_at    | -                | -0,926850548 | -0,160136748 | -0,7667138  |  |
| 210230_at    | -                | 1,496984567  | 2,264418116  | -0,76743355 |  |
| 1561657_at   | -                | -3,054236653 | -2,286583451 | -0,7676532  |  |
| 215522_at    | SORCS3           | -3,054236653 | -2,286583451 | -0,7676532  |  |
| 242115_at    | -                | -3,054236653 | -2,286583451 | -0,7676532  |  |
| 1560898_at   | -                | -2,262747984 | -1,494668682 | -0,7680793  |  |
| 209559_at    | HIP1R            | -2,262747984 | -1,494668682 | -0,7680793  |  |
| 216785_at    | -                | -2,262747984 | -1,494668682 | -0,7680793  |  |
| 219414_at    | CLSTN2           | -2,262747984 | -1,494668682 | -0,7680793  |  |
| 220866_at    | ADAMTS6          | -2,262747984 | -1,494668682 | -0,7680793  |  |

|              |                 |              |              |             |  |
|--------------|-----------------|--------------|--------------|-------------|--|
| 231008_at    | UNC5CL          | -2,262747984 | -1,494668682 | -0,7680793  |  |
| 231074_at    | -               | -2,262747984 | -1,494668682 | -0,7680793  |  |
| 234810_at    | ZFP1            | -2,262747984 | -1,494668682 | -0,7680793  |  |
| 241679_at    | -               | -2,262747984 | -1,494668682 | -0,7680793  |  |
| 244571_s_at  | -               | -2,262747984 | -1,494668682 | -0,7680793  |  |
| 205871_at    | PLGLA /// PLGLE | -2,930741289 | -2,162639771 | -0,76810152 |  |
| 221682_s_at  | PCDHGB6         | -2,930741289 | -2,162639771 | -0,76810152 |  |
| 229775_s_at  | MLLT4           | -2,930741289 | -2,162639771 | -0,76810152 |  |
| 241199_x_at  | DPPA4           | -2,930741289 | -2,162639771 | -0,76810152 |  |
| 1556364_at   | ADAMTS9-AS2     | -1,026571149 | -0,258114234 | -0,76845691 |  |
| 1562728_at   | -               | -1,026571149 | -0,258114234 | -0,76845691 |  |
| 204718_at    | EPHB6           | -1,026571149 | -0,258114234 | -0,76845691 |  |
| 208519_x_at  | GNRH2           | -1,026571149 | -0,258114234 | -0,76845691 |  |
| 239009_at    | KIAA0754        | -1,026571149 | -0,258114234 | -0,76845691 |  |
| 215633_x_at  | LST1            | 0,384950573  | 1,153866761  | -0,76891619 |  |
| 1556717_at   | -               | -2,43257096  | -1,663414495 | -0,76915647 |  |
| 1560510_at   | -               | -2,43257096  | -1,663414495 | -0,76915647 |  |
| 1567058_at   | OR8G2           | -2,43257096  | -1,663414495 | -0,76915647 |  |
| 1569816_at   | -               | -2,43257096  | -1,663414495 | -0,76915647 |  |
| 214362_at    | RGS12           | -2,43257096  | -1,663414495 | -0,76915647 |  |
| 215018_at    | KIAA1731        | -2,43257096  | -1,663414495 | -0,76915647 |  |
| 219837_s_at  | CYTL1           | -2,43257096  | -1,663414495 | -0,76915647 |  |
| 223750_s_at  | TLR10           | -2,43257096  | -1,663414495 | -0,76915647 |  |
| 241700_at    | ZFHX4           | -2,43257096  | -1,663414495 | -0,76915647 |  |
| 243300_at    | -               | -2,43257096  | -1,663414495 | -0,76915647 |  |
| 243962_at    | -               | -2,43257096  | -1,663414495 | -0,76915647 |  |
| 1553485_at   | CCDC140         | -2,311268652 | -1,541908042 | -0,76936061 |  |
| 1563145_at   | LINC00301       | -2,311268652 | -1,541908042 | -0,76936061 |  |
| 1566123_at   | FABP6           | -2,311268652 | -1,541908042 | -0,76936061 |  |
| 1566965_at   | -               | -2,311268652 | -1,541908042 | -0,76936061 |  |
| 1569746_s_at | LOC100505783    | -2,311268652 | -1,541908042 | -0,76936061 |  |
| 214859_at    | FSTL4           | -2,311268652 | -1,541908042 | -0,76936061 |  |
| 221339_at    | OR10C1          | -2,311268652 | -1,541908042 | -0,76936061 |  |
| 233033_at    | ZEB2            | -2,311268652 | -1,541908042 | -0,76936061 |  |
| 240731_at    | -               | -2,311268652 | -1,541908042 | -0,76936061 |  |
| 244262_x_at  | -               | -2,311268652 | -1,541908042 | -0,76936061 |  |
| 1556156_at   | ESRRB           | -2,384869671 | -1,615132408 | -0,76973726 |  |
| 206685_at    | HCG4            | -2,384869671 | -1,615132408 | -0,76973726 |  |
| 224249_at    | -               | -2,384869671 | -1,615132408 | -0,76973726 |  |
| 230863_at    | LRP2            | -2,384869671 | -1,615132408 | -0,76973726 |  |
| 231318_at    | DNM1P46         | -2,384869671 | -1,615132408 | -0,76973726 |  |
| 239421_at    | FLJ35776        | -2,384869671 | -1,615132408 | -0,76973726 |  |
| 240990_at    | RAB5A           | -2,384869671 | -1,615132408 | -0,76973726 |  |
| 234642_at    | -               | -0,741668563 | 0,028364014  | -0,77003258 |  |
| 226377_at    | NFIC            | -0,033456564 | 0,73688026   | -0,77033682 |  |
| 1567622_at   | ABLM2           | -0,85085127  | -0,079522948 | -0,77132832 |  |
| 229597_s_at  | WDFY4           | -0,85085127  | -0,079522948 | -0,77132832 |  |
| 232836_at    | C20orf61        | -0,85085127  | -0,079522948 | -0,77132832 |  |
| 242786_at    | SBF2-AS1        | -0,85085127  | -0,079522948 | -0,77132832 |  |
| 1562166_at   | -               | -1,591296941 | -0,819238336 | -0,77205861 |  |
| 216345_at    | KIAA0913        | -1,591296941 | -0,819238336 | -0,77205861 |  |
| 222372_at    | -               | -1,591296941 | -0,819238336 | -0,77205861 |  |
| 238868_at    | UACA            | -1,591296941 | -0,819238336 | -0,77205861 |  |
| 239179_at    | -               | -1,591296941 | -0,819238336 | -0,77205861 |  |
| 1570251_at   | HECTD1          | -1,308181863 | -0,536087151 | -0,77209471 |  |
| 206203_at    | RCVRN           | -1,308181863 | -0,536087151 | -0,77209471 |  |



|              |                 |              |              |             |  |
|--------------|-----------------|--------------|--------------|-------------|--|
| 1570068_at   | -               | 0,255492549  | 1,029536893  | -0,77404434 |  |
| 236110_at    | -               | -0,136301282 | 0,638150376  | -0,77445166 |  |
| 1556645_s_at | -               | -1,888254346 | -1,112851844 | -0,7754025  |  |
| 215060_at    | -               | -1,888254346 | -1,112851844 | -0,7754025  |  |
| 217330_at    | DISC1           | -1,888254346 | -1,112851844 | -0,7754025  |  |
| 221330_at    | CHRM2           | -1,888254346 | -1,112851844 | -0,7754025  |  |
| 222223_s_at  | IL36RN          | -1,888254346 | -1,112851844 | -0,7754025  |  |
| 224165_s_at  | IQCH            | -1,888254346 | -1,112851844 | -0,7754025  |  |
| 233606_at    | -               | -1,888254346 | -1,112851844 | -0,7754025  |  |
| 1554152_a_at | OGDH            | -1,688127507 | -0,912331589 | -0,77579592 |  |
| 1556281_at   | -               | -1,688127507 | -0,912331589 | -0,77579592 |  |
| 207682_s_at  | KIF25           | -1,688127507 | -0,912331589 | -0,77579592 |  |
| 207962_at    | CAPN11          | -1,688127507 | -0,912331589 | -0,77579592 |  |
| 213967_at    | RALYL           | -1,688127507 | -0,912331589 | -0,77579592 |  |
| 220569_at    | -               | -1,688127507 | -0,912331589 | -0,77579592 |  |
| 237960_at    | -               | -1,688127507 | -0,912331589 | -0,77579592 |  |
| 239259_at    | ZNF557          | -1,688127507 | -0,912331589 | -0,77579592 |  |
| 216366_x_at  | -               | 0,760715727  | 1,536652708  | -0,77593698 |  |
| 232426_at    | SV2B            | -0,423248115 | 0,352836757  | -0,77608487 |  |
| 210749_x_at  | DDR1 /// MIR464 | -0,259832361 | 0,51742585   | -0,77725821 |  |
| 1566528_at   | CUX2            | -1,424023738 | -0,646746079 | -0,77727766 |  |
| 1569737_a_at | CASKIN1         | -1,424023738 | -0,646746079 | -0,77727766 |  |
| 208539_x_at  | SPRR2B          | -1,424023738 | -0,646746079 | -0,77727766 |  |
| 210807_s_at  | SLC16A7         | -1,424023738 | -0,646746079 | -0,77727766 |  |
| 239028_at    | LYPD6           | -1,424023738 | -0,646746079 | -0,77727766 |  |
| 211870_s_at  | PCDHA3          | -1,196375121 | -0,41858459  | -0,77779053 |  |
| 219127_at    | PRR15L          | -1,196375121 | -0,41858459  | -0,77779053 |  |
| 205563_at    | KISS1           | -1,543331864 | -0,765504029 | -0,77782784 |  |
| 210454_s_at  | KCNJ6           | -1,543331864 | -0,765504029 | -0,77782784 |  |
| 215866_at    | -               | -1,543331864 | -0,765504029 | -0,77782784 |  |
| 223632_s_at  | -               | -1,543331864 | -0,765504029 | -0,77782784 |  |
| 230199_at    | -               | -1,543331864 | -0,765504029 | -0,77782784 |  |
| 235087_at    | UNKL            | -1,543331864 | -0,765504029 | -0,77782784 |  |
| 243170_at    | -               | -1,543331864 | -0,765504029 | -0,77782784 |  |
| 243810_at    | -               | -1,543331864 | -0,765504029 | -0,77782784 |  |
| 225039_at    | LOC729020 /// R | 2,261526912  | 3,039473081  | -0,77794617 |  |
| 222341_x_at  | -               | -1,240169874 | -0,461594427 | -0,77857545 |  |
| 240009_at    | -               | -1,240169874 | -0,461594427 | -0,77857545 |  |
| 242934_at    | -               | -1,240169874 | -0,461594427 | -0,77857545 |  |
| 1560013_at   | PDXDC1          | -2,866296344 | -2,086984744 | -0,7793116  |  |
| 1562046_at   | -               | -2,866296344 | -2,086984744 | -0,7793116  |  |
| 216518_at    | -               | -2,866296344 | -2,086984744 | -0,7793116  |  |
| 235617_x_at  | LOC100507537    | -2,866296344 | -2,086984744 | -0,7793116  |  |
| 237493_at    | IL22RA2         | -2,866296344 | -2,086984744 | -0,7793116  |  |
| 241506_at    | -               | -2,866296344 | -2,086984744 | -0,7793116  |  |
| 1563385_at   | LINC00307       | -3,114791413 | -2,335104118 | -0,77968729 |  |
| 233001_at    | SAMD10          | -0,055687482 | 0,724100169  | -0,77978765 |  |
| 1566474_at   | -               | -0,622910612 | 0,157549243  | -0,78045986 |  |
| 1561204_at   | -               | -2,64318869  | -1,862647763 | -0,78054093 |  |
| 207401_at    | PROX1           | -2,64318869  | -1,862647763 | -0,78054093 |  |
| 211191_at    | CD84            | -2,64318869  | -1,862647763 | -0,78054093 |  |
| 219614_s_at  | SLC6A20         | -2,64318869  | -1,862647763 | -0,78054093 |  |
| 220460_at    | SLCO1C1         | -2,64318869  | -1,862647763 | -0,78054093 |  |
| 237733_at    | -               | -2,64318869  | -1,862647763 | -0,78054093 |  |
| 240438_at    | -               | -2,64318869  | -1,862647763 | -0,78054093 |  |
| 201866_s_at  | NR3C1           | 0,46522187   | 1,246149888  | -0,78092802 |  |

|              |                 |              |              |             |  |
|--------------|-----------------|--------------|--------------|-------------|--|
| 237881_at    | -               | -0,089689931 | 0,691645685  | -0,78133562 |  |
| 210272_at    | CYP2B7P1        | -1,131062212 | -0,34958478  | -0,78147743 |  |
| 210938_at    | PDX1            | -1,131062212 | -0,34958478  | -0,78147743 |  |
| 232104_at    | C1orf95         | -1,131062212 | -0,34958478  | -0,78147743 |  |
| 236072_at    | -               | -1,131062212 | -0,34958478  | -0,78147743 |  |
| 239201_at    | CDK15           | -1,131062212 | -0,34958478  | -0,78147743 |  |
| 241932_at    | -               | -1,131062212 | -0,34958478  | -0,78147743 |  |
| 225167_at    | FRMD4A          | -0,67289328  | 0,109221392  | -0,78211467 |  |
| 213771_at    | IRF2BP1         | 1,05337236   | 1,835911187  | -0,78253883 |  |
| 1564050_at   | LOC100131347    | -1,937711681 | -1,154897679 | -0,782814   |  |
| 1564215_at   | -               | -1,937711681 | -1,154897679 | -0,782814   |  |
| 1564444_at   | LOC100130264    | -1,937711681 | -1,154897679 | -0,782814   |  |
| 215797_at    | TRAV8-3         | -1,937711681 | -1,154897679 | -0,782814   |  |
| 231303_at    | LINC00158       | -1,937711681 | -1,154897679 | -0,782814   |  |
| 233405_at    | -               | -1,937711681 | -1,154897679 | -0,782814   |  |
| 244399_at    | -               | -1,937711681 | -1,154897679 | -0,782814   |  |
| 1564060_at   | LOC144742       | -1,639579028 | -0,855751026 | -0,783828   |  |
| 235761_at    | -               | 0,606430281  | 1,390636111  | -0,78420583 |  |
| 1560263_at   | -               | 0,255492549  | 1,039887232  | -0,78439468 |  |
| 203240_at    | FCGBP           | -0,366776884 | 0,417770464  | -0,78454735 |  |
| 1553067_a_at | GNRHR2          | -1,399512875 | -0,614371577 | -0,7851413  |  |
| 1556510_at   | -               | -1,399512875 | -0,614371577 | -0,7851413  |  |
| 208318_s_at  | XYLB            | -1,399512875 | -0,614371577 | -0,7851413  |  |
| 229242_at    | TNFSF15         | -1,399512875 | -0,614371577 | -0,7851413  |  |
| 240313_at    | DMRTB1          | -1,399512875 | -0,614371577 | -0,7851413  |  |
| 241614_at    | -               | -1,399512875 | -0,614371577 | -0,7851413  |  |
| 1556314_a_at | -               | -2,823166348 | -2,037551727 | -0,78561462 |  |
| 229367_s_at  | GIMAP6          | -2,823166348 | -2,037551727 | -0,78561462 |  |
| 234812_at    | LRRC59          | -2,823166348 | -2,037551727 | -0,78561462 |  |
| 237068_at    | -               | -2,823166348 | -2,037551727 | -0,78561462 |  |
| 211176_s_at  | PAX4            | -0,706943342 | 0,079428135  | -0,78637148 |  |
| 203071_at    | SEMA3B          | -0,888496123 | -0,102100538 | -0,78639558 |  |
| 235160_at    | ATF7            | -0,888496123 | -0,102100538 | -0,78639558 |  |
| 238157_at    | -               | -0,888496123 | -0,102100538 | -0,78639558 |  |
| 216083_s_at  | NEU3            | -0,196756757 | 0,589657387  | -0,78641414 |  |
| 216273_at    | ZNF460          | -1,353583928 | -0,566887459 | -0,78669647 |  |
| 223896_at    | FKSG29          | -1,353583928 | -0,566887459 | -0,78669647 |  |
| 233691_at    | -               | -1,353583928 | -0,566887459 | -0,78669647 |  |
| 237383_at    | -               | -1,353583928 | -0,566887459 | -0,78669647 |  |
| 239343_at    | LOC728705       | -1,353583928 | -0,566887459 | -0,78669647 |  |
| 204993_at    | GNAZ            | -0,946847173 | -0,160136748 | -0,78671042 |  |
| 209554_at    | CD36            | -0,946847173 | -0,160136748 | -0,78671042 |  |
| 229240_at    | ZDHHC21         | -0,946847173 | -0,160136748 | -0,78671042 |  |
| 233196_at    | -               | -0,946847173 | -0,160136748 | -0,78671042 |  |
| 1553422_s_at | RBFOX1          | -1,518072576 | -0,730778808 | -0,78729377 |  |
| 206320_s_at  | SMAD9           | -1,518072576 | -0,730778808 | -0,78729377 |  |
| 211145_x_at  | IFNA21          | -1,518072576 | -0,730778808 | -0,78729377 |  |
| 218835_at    | SFTPA1 /// SFTP | -1,518072576 | -0,730778808 | -0,78729377 |  |
| 218922_s_at  | CERS4           | -1,518072576 | -0,730778808 | -0,78729377 |  |
| 230419_at    | FLJ37644        | -1,518072576 | -0,730778808 | -0,78729377 |  |
| 231641_at    | EBLN2           | -1,518072576 | -0,730778808 | -0,78729377 |  |
| 1564254_at   | KY              | -0,759588698 | 0,028364014  | -0,78795271 |  |
| 211497_x_at  | NKX3-1          | -0,759588698 | 0,028364014  | -0,78795271 |  |
| 213996_at    | YPEL1           | -1,838812296 | -1,050406615 | -0,78840568 |  |
| 219605_at    | ZNF3            | -1,838812296 | -1,050406615 | -0,78840568 |  |
| 240671_at    | -               | -1,838812296 | -1,050406615 | -0,78840568 |  |

|              |                |              |              |             |  |
|--------------|----------------|--------------|--------------|-------------|--|
| 244445_at    | -              | -1,838812296 | -1,050406615 | -0,78840568 |  |
| 1557036_at   | ZBTB1          | -3,07502285  | -2,286583451 | -0,7884394  |  |
| 214070_s_at  | ATP10B         | -0,394749123 | 0,393761504  | -0,78851063 |  |
| 212488_at    | COL5A1         | -1,047650486 | -0,258114234 | -0,78953625 |  |
| 216670_at    | KLK13          | -1,047650486 | -0,258114234 | -0,78953625 |  |
| 214678_x_at  | ZFX            | 1,352503698  | 2,14244844   | -0,78994474 |  |
| 203354_s_at  | PSD3           | -0,926850548 | -0,136643983 | -0,79020657 |  |
| 221116_at    | -              | -0,926850548 | -0,136643983 | -0,79020657 |  |
| 202766_s_at  | FBN1           | 0,103263601  | 0,893473268  | -0,79020967 |  |
| 233756_at    | -              | -0,986356909 | -0,19610998  | -0,79024693 |  |
| 240617_at    | LOC100287098   | -0,986356909 | -0,19610998  | -0,79024693 |  |
| 1564233_at   | FLJ33534       | -1,470833215 | -0,679763839 | -0,79106938 |  |
| 1565783_at   | TNK2           | -1,470833215 | -0,679763839 | -0,79106938 |  |
| 217390_x_at  | -              | -1,470833215 | -0,679763839 | -0,79106938 |  |
| 235254_at    | -              | -1,470833215 | -0,679763839 | -0,79106938 |  |
| 235601_at    | -              | -0,543051993 | 0,249604176  | -0,79265617 |  |
| 1555668_a_at | PARK2          | -2,01371626  | -1,220210588 | -0,79350567 |  |
| 239808_at    | -              | -3,250025915 | -2,456406426 | -0,79361949 |  |
| 207612_at    | WNT8B          | -1,2845686   | -0,490927335 | -0,79364127 |  |
| 237080_at    | -              | -1,2845686   | -0,490927335 | -0,79364127 |  |
| 241445_at    | -              | -1,2845686   | -0,490927335 | -0,79364127 |  |
| 1556200_a_at | C10orf90       | -2,756478458 | -1,961547147 | -0,79493131 |  |
| 1559037_a_at | -              | -2,756478458 | -1,961547147 | -0,79493131 |  |
| 1562653_at   | -              | -2,756478458 | -1,961547147 | -0,79493131 |  |
| 1565668_at   | LOC100288366 / | -2,756478458 | -1,961547147 | -0,79493131 |  |
| 203962_s_at  | NEBL           | -2,756478458 | -1,961547147 | -0,79493131 |  |
| 237582_at    | -              | -2,756478458 | -1,961547147 | -0,79493131 |  |
| 203400_s_at  | TF             | -2,063149277 | -1,264005341 | -0,79914394 |  |
| 215808_at    | KLK10          | -2,063149277 | -1,264005341 | -0,79914394 |  |
| 232562_at    | -              | -2,063149277 | -1,264005341 | -0,79914394 |  |
| 234034_at    | -              | -2,063149277 | -1,264005341 | -0,79914394 |  |
| 238289_at    | -              | -2,063149277 | -1,264005341 | -0,79914394 |  |
| 1560751_at   | CHST9-AS1      | -2,712026959 | -1,912089812 | -0,79993715 |  |
| 1569355_at   | KCNIP3         | -2,712026959 | -1,912089812 | -0,79993715 |  |
| 216312_at    | ATP2B3         | -2,712026959 | -1,912089812 | -0,79993715 |  |
| 216823_at    | RPS3A /// SNOR | -0,366776884 | 0,433557298  | -0,80033418 |  |
| 233689_at    | -              | -0,423248115 | 0,377530647  | -0,80077876 |  |
| 239535_at    | -              | -0,67289328  | 0,128747141  | -0,80164042 |  |
| 205465_x_at  | HS3ST1         | -1,71423189  | -0,912331589 | -0,8019003  |  |
| 207533_at    | CCL1           | -1,71423189  | -0,912331589 | -0,8019003  |  |
| 241406_at    | FAM83H         | -1,71423189  | -0,912331589 | -0,8019003  |  |
| 210500_at    | -              | -3,013665402 | -2,211750327 | -0,80191507 |  |
| 228064_at    | FAM211B        | 0,555999837  | 1,3579181    | -0,80191826 |  |
| 216058_s_at  | CYP2C19        | -1,812418401 | -1,010192375 | -0,80222603 |  |
| 216732_at    | -              | -1,812418401 | -1,010192375 | -0,80222603 |  |
| 229651_at    | SEZ6           | -1,812418401 | -1,010192375 | -0,80222603 |  |
| 232157_at    | SPRY3          | -1,812418401 | -1,010192375 | -0,80222603 |  |
| 233007_at    | -              | -1,812418401 | -1,010192375 | -0,80222603 |  |
| 234578_at    | -              | -1,812418401 | -1,010192375 | -0,80222603 |  |
| 239798_at    | -              | -1,812418401 | -1,010192375 | -0,80222603 |  |
| 1565692_at   | -              | -0,79540287  | 0,007421914  | -0,80282478 |  |
| 203443_at    | EML3           | -0,467091869 | 0,336136178  | -0,80322805 |  |
| 217618_x_at  | HUS1           | 0,03125738   | 0,835239052  | -0,80398167 |  |
| 236168_at    | -              | 0,03125738   | 0,835239052  | -0,80398167 |  |
| 1570372_at   | -              | -2,667025278 | -1,862647763 | -0,80437752 |  |
| 217853_at    | TNS3           | -2,667025278 | -1,862647763 | -0,80437752 |  |

|              |                 |              |              |             |  |
|--------------|-----------------|--------------|--------------|-------------|--|
| 220182_at    | SLC25A23        | -0,112808516 | 0,691645685  | -0,8044542  |  |
| 1555188_at   | MTUS2-AS1       | -0,85085127  | -0,046302147 | -0,80454912 |  |
| 231238_at    | LOC100506075    | -1,089016378 | -0,283667828 | -0,80534855 |  |
| 232608_x_at  | CARD14          | -1,089016378 | -0,283667828 | -0,80534855 |  |
| 238579_at    | C9orf85         | -1,089016378 | -0,283667828 | -0,80534855 |  |
| 242998_at    | RDH12           | -1,089016378 | -0,283667828 | -0,80534855 |  |
| 206733_at    | TULP2           | -1,196375121 | -0,39061235  | -0,80576277 |  |
| 223379_s_at  | LATS2           | -1,196375121 | -0,39061235  | -0,80576277 |  |
| 227183_at    | MIR143HG        | -1,196375121 | -0,39061235  | -0,80576277 |  |
| 231649_at    | -               | -0,512251684 | 0,293518836  | -0,80577052 |  |
| 243109_at    | MCTP2           | -0,512251684 | 0,293518836  | -0,80577052 |  |
| 1561597_x_at | -               | -1,026571149 | -0,220592223 | -0,80597893 |  |
| 220166_at    | CNNM1           | -1,026571149 | -0,220592223 | -0,80597893 |  |
| 228210_at    | NXPH3           | -1,026571149 | -0,220592223 | -0,80597893 |  |
| 1555942_a_at | MIR205HG        | -2,138804305 | -1,332017329 | -0,80678698 |  |
| 1559810_at   | -               | -2,138804305 | -1,332017329 | -0,80678698 |  |
| 1565735_at   | -               | -2,138804305 | -1,332017329 | -0,80678698 |  |
| 220110_s_at  | NXF3            | -2,138804305 | -1,332017329 | -0,80678698 |  |
| 229462_at    | -               | -2,138804305 | -1,332017329 | -0,80678698 |  |
| 234238_at    | MAP1LC3B2       | -2,138804305 | -1,332017329 | -0,80678698 |  |
| 243056_at    | C12orf60        | -2,138804305 | -1,332017329 | -0,80678698 |  |
| 1555197_a_at | C21orf58        | -0,496991414 | 0,310717132  | -0,80770855 |  |
| 206867_at    | GCKR            | -1,131062212 | -0,322870281 | -0,80819193 |  |
| 215389_s_at  | TNNT2           | -1,131062212 | -0,322870281 | -0,80819193 |  |
| 220277_at    | CXXC4           | -0,888496123 | -0,079522948 | -0,80897317 |  |
| 1552570_at   | TSPEAR          | -1,964176657 | -1,154897679 | -0,80927898 |  |
| 1555235_s_at | IQCF3           | -1,964176657 | -1,154897679 | -0,80927898 |  |
| 1561422_at   | -               | -1,964176657 | -1,154897679 | -0,80927898 |  |
| 1570480_s_at | ART1            | -1,964176657 | -1,154897679 | -0,80927898 |  |
| 215486_at    | PRPS1L1         | -1,964176657 | -1,154897679 | -0,80927898 |  |
| 219300_s_at  | CNTNAP2         | -1,964176657 | -1,154897679 | -0,80927898 |  |
| 226869_at    | MEGF6           | -1,964176657 | -1,154897679 | -0,80927898 |  |
| 242372_s_at  | MFSD4           | -1,964176657 | -1,154897679 | -0,80927898 |  |
| 203423_at    | RBP1            | -1,424023738 | -0,614371577 | -0,80965216 |  |
| 238107_at    | -               | -1,424023738 | -0,614371577 | -0,80965216 |  |
| 1554951_at   | -               | -2,972500237 | -2,162639771 | -0,80986047 |  |
| 231702_at    | TDO2            | -2,972500237 | -2,162639771 | -0,80986047 |  |
| 239558_at    | -               | -2,972500237 | -2,162639771 | -0,80986047 |  |
| 223766_at    | LOC100133130    | -0,946847173 | -0,136643983 | -0,81020319 |  |
| 243449_at    | -               | -0,543051993 | 0,26733076   | -0,81038275 |  |
| 1553452_at   | MYO1H           | -2,597496523 | -1,787089803 | -0,81040672 |  |
| 216561_x_at  | -               | -2,597496523 | -1,787089803 | -0,81040672 |  |
| 224136_at    | -               | -2,597496523 | -1,787089803 | -0,81040672 |  |
| 239805_at    | SLC13A2         | -2,597496523 | -1,787089803 | -0,81040672 |  |
| 1557618_at   | LOC285768       | -2,187914861 | -1,377419394 | -0,81049547 |  |
| 1559392_s_at | SYT7            | -2,187914861 | -1,377419394 | -0,81049547 |  |
| 205237_at    | FCN1            | -2,187914861 | -1,377419394 | -0,81049547 |  |
| 217680_x_at  | RPL10 /// SNORA | -2,187914861 | -1,377419394 | -0,81049547 |  |
| 230315_at    | -               | -2,187914861 | -1,377419394 | -0,81049547 |  |
| 231610_at    | TTBK2           | -2,187914861 | -1,377419394 | -0,81049547 |  |
| 233155_at    | UPP2            | -2,187914861 | -1,377419394 | -0,81049547 |  |
| 239809_at    | -               | -2,187914861 | -1,377419394 | -0,81049547 |  |
| 240950_s_at  | CCDC155         | -2,187914861 | -1,377419394 | -0,81049547 |  |
| 241550_at    | DPPA5           | -2,187914861 | -1,377419394 | -0,81049547 |  |
| 242774_at    | SYNE2           | -2,187914861 | -1,377419394 | -0,81049547 |  |
| 1554730_at   | MCTP1           | -1,543331864 | -0,730778808 | -0,81255306 |  |

|              |                 |              |              |             |  |
|--------------|-----------------|--------------|--------------|-------------|--|
| 1560631_at   | CALCOCO2        | -1,543331864 | -0,730778808 | -0,81255306 |  |
| 1565149_at   | DYNC2H1         | -1,763254337 | -0,950686014 | -0,81256832 |  |
| 222306_at    | -               | -1,763254337 | -0,950686014 | -0,81256832 |  |
| 244489_at    | LOC100129268 /  | -1,763254337 | -0,950686014 | -0,81256832 |  |
| 1566110_at   | PIEZO1          | -0,59053611  | 0,222599095  | -0,81313521 |  |
| 234723_x_at  | -               | 1,462198073  | 2,275409734  | -0,81321166 |  |
| 1552449_a_at | SCGB1C1         | -2,551294263 | -1,738067356 | -0,81322691 |  |
| 1563114_at   | -               | -2,551294263 | -1,738067356 | -0,81322691 |  |
| 231996_at    | N4BP2           | -2,551294263 | -1,738067356 | -0,81322691 |  |
| 1553249_at   | SMC1B           | -2,236765673 | -1,423348341 | -0,81341733 |  |
| 1569882_at   | NPHP3-AS1       | -2,236765673 | -1,423348341 | -0,81341733 |  |
| 203475_at    | CYP19A1         | -2,236765673 | -1,423348341 | -0,81341733 |  |
| 206619_at    | DKK4            | -2,236765673 | -1,423348341 | -0,81341733 |  |
| 220428_at    | CD207           | -2,236765673 | -1,423348341 | -0,81341733 |  |
| 232669_at    | HIF3A           | -2,236765673 | -1,423348341 | -0,81341733 |  |
| 234901_at    | -               | -2,236765673 | -1,423348341 | -0,81341733 |  |
| 238645_at    | -               | -2,236765673 | -1,423348341 | -0,81341733 |  |
| 215528_at    | -               | 0,20027154   | 1,013870809  | -0,81359927 |  |
| 226210_s_at  | MEG3            | 0,457392764  | 1,272721751  | -0,81532899 |  |
| 232916_at    | -               | -0,706943342 | 0,109221392  | -0,81616473 |  |
| 217951_s_at  | PHF3            | 0,133056859  | 0,949447784  | -0,81639093 |  |
| 1569815_x_at | STRN            | -2,479842156 | -1,663414495 | -0,81642766 |  |
| 206189_at    | UNC5C           | -2,479842156 | -1,663414495 | -0,81642766 |  |
| 210584_s_at  | POLDIP3 /// RRP | -2,479842156 | -1,663414495 | -0,81642766 |  |
| 221696_s_at  | STYK1           | -2,479842156 | -1,663414495 | -0,81642766 |  |
| 214862_x_at  | -               | -0,299034815 | 0,51742585   | -0,81646067 |  |
| 1553549_at   | VN1R2           | -2,311268652 | -1,494668682 | -0,81659997 |  |
| 1564000_at   | ANKRD31         | -2,311268652 | -1,494668682 | -0,81659997 |  |
| 208293_x_at  | CSHL1           | -2,311268652 | -1,494668682 | -0,81659997 |  |
| 215902_at    | -               | -2,311268652 | -1,494668682 | -0,81659997 |  |
| 219440_at    | RAI2            | -2,311268652 | -1,494668682 | -0,81659997 |  |
| 1567065_at   | OR1Q1           | -1,308181863 | -0,490927335 | -0,81725453 |  |
| 211258_s_at  | TGFA            | -1,308181863 | -0,490927335 | -0,81725453 |  |
| 215685_s_at  | DLX2            | -1,308181863 | -0,490927335 | -0,81725453 |  |
| 236854_at    | LINC00494       | -1,308181863 | -0,490927335 | -0,81725453 |  |
| 242637_at    | -               | -1,308181863 | -0,490927335 | -0,81725453 |  |
| 1552900_a_at | MGC34034        | -2,43257096  | -1,615132408 | -0,81743855 |  |
| 231799_at    | TANC2           | -2,43257096  | -1,615132408 | -0,81743855 |  |
| 240159_at    | SLC15A2         | -2,43257096  | -1,615132408 | -0,81743855 |  |
| 206944_at    | HTR6            | -1,353583928 | -0,536087151 | -0,81749678 |  |
| 216667_at    | ECRP            | -1,353583928 | -0,536087151 | -0,81749678 |  |
| 232439_at    | -               | -1,353583928 | -0,536087151 | -0,81749678 |  |
| 1552961_at   | -               | -2,359436556 | -1,541908042 | -0,81752851 |  |
| 1566447_at   | CD6             | -2,359436556 | -1,541908042 | -0,81752851 |  |
| 238671_at    | EPHA4           | -2,359436556 | -1,541908042 | -0,81752851 |  |
| 242693_at    | -               | -2,359436556 | -1,541908042 | -0,81752851 |  |
| 244141_at    | -               | -2,359436556 | -1,541908042 | -0,81752851 |  |
| 1566150_at   | CALML4          | -2,779459409 | -1,961547147 | -0,81791226 |  |
| 240457_at    | -               | -2,779459409 | -1,961547147 | -0,81791226 |  |
| 203937_s_at  | TAF1C           | -0,285837228 | 0,532164371  | -0,8180016  |  |
| 243228_at    | GTF3C4          | -0,285837228 | 0,532164371  | -0,8180016  |  |
| 233429_at    | SPEF2           | -0,759588698 | 0,059218869  | -0,81880757 |  |
| 229665_at    | CSTF3           | 1,139070151  | 1,958277216  | -0,81920707 |  |
| 1555322_at   | PP2672          | -1,639579028 | -0,819238336 | -0,82034069 |  |
| 1560264_at   | -               | -1,639579028 | -0,819238336 | -0,82034069 |  |
| 1566218_at   | KRTAP5-2        | -1,639579028 | -0,819238336 | -0,82034069 |  |

|             |                |              |              |             |  |
|-------------|----------------|--------------|--------------|-------------|--|
| 213299_at   | ZBTB7A         | -1,639579028 | -0,819238336 | -0,82034069 |  |
| 214564_s_at | PCDHGC3        | -1,639579028 | -0,819238336 | -0,82034069 |  |
| 229875_at   | ZDHHC22        | -1,639579028 | -0,819238336 | -0,82034069 |  |
| 233530_at   | -              | -1,639579028 | -0,819238336 | -0,82034069 |  |
| 221835_at   | DTX3           | -0,741668563 | 0,079428135  | -0,8210967  |  |
| 231115_at   | POLH           | -0,741668563 | 0,079428135  | -0,8210967  |  |
| 1554711_at  | CALHM3         | -1,240169874 | -0,41858459  | -0,82158528 |  |
| 222095_s_at | FAM163A        | -1,240169874 | -0,41858459  | -0,82158528 |  |
| 234012_at   | -              | -1,240169874 | -0,41858459  | -0,82158528 |  |
| 237532_at   | -              | -1,240169874 | -0,41858459  | -0,82158528 |  |
| 1556531_at  | -              | -2,908843709 | -2,086984744 | -0,82185897 |  |
| 1569971_at  | LOC100288721   | -2,908843709 | -2,086984744 | -0,82185897 |  |
| 236671_at   | -              | 0,480753764  | 1,303116084  | -0,82236232 |  |
| 208558_at   | OR10H1         | -1,2845686   | -0,461594427 | -0,82297417 |  |
| 210158_at   | ERCC4          | -1,2845686   | -0,461594427 | -0,82297417 |  |
| 234519_at   | NOBOX          | -1,2845686   | -0,461594427 | -0,82297417 |  |
| 205936_s_at | HK3            | -0,79540287  | 0,028364014  | -0,82376688 |  |
| 210083_at   | SEMA7A         | -0,79540287  | 0,028364014  | -0,82376688 |  |
| 242891_at   | ADCY5          | -0,79540287  | 0,028364014  | -0,82376688 |  |
| 215543_s_at | LARGE          | -0,234278768 | 0,589657387  | -0,82393615 |  |
| 218394_at   | ROGDI          | 0,052199481  | 0,876248481  | -0,824049   |  |
| 215916_at   | CHRNE          | -1,470833215 | -0,646746079 | -0,82408714 |  |
| 241003_at   | -              | -1,470833215 | -0,646746079 | -0,82408714 |  |
| 1558747_at  | SMCHD1         | -0,926850548 | -0,102100538 | -0,82475001 |  |
| 233143_at   | C20orf173      | -0,926850548 | -0,102100538 | -0,82475001 |  |
| 1562801_at  | -              | -1,937711681 | -1,112851844 | -0,82485984 |  |
| 207278_s_at | CD209          | -1,937711681 | -1,112851844 | -0,82485984 |  |
| 235575_at   | -              | -1,937711681 | -1,112851844 | -0,82485984 |  |
| 238267_s_at | -              | -1,937711681 | -1,112851844 | -0,82485984 |  |
| 240087_at   | -              | -1,937711681 | -1,112851844 | -0,82485984 |  |
| 242454_at   | -              | -1,937711681 | -1,112851844 | -0,82485984 |  |
| 216142_at   | -              | -2,089474779 | -1,264005341 | -0,82546944 |  |
| 243216_x_at | -              | -2,089474779 | -1,264005341 | -0,82546944 |  |
| 220826_at   | TCP10L         | -1,591296941 | -0,765504029 | -0,82579291 |  |
| 234379_at   | FLT4           | -1,591296941 | -0,765504029 | -0,82579291 |  |
| 236796_at   | -              | -1,591296941 | -0,765504029 | -0,82579291 |  |
| 237483_at   | -              | -1,591296941 | -0,765504029 | -0,82579291 |  |
| 237632_at   | -              | -1,591296941 | -0,765504029 | -0,82579291 |  |
| 242912_at   | POTEG /// POTE | -1,591296941 | -0,765504029 | -0,82579291 |  |
| 1556383_at  | -              | -0,986356909 | -0,160136748 | -0,82622016 |  |
| 1566186_at  | -              | -0,986356909 | -0,160136748 | -0,82622016 |  |
| 1556952_at  | -              | -0,85085127  | -0,024572586 | -0,82627868 |  |
| 1568760_at  | MYH11          | -0,85085127  | -0,024572586 | -0,82627868 |  |
| 237457_at   | EIF3B          | -0,85085127  | -0,024572586 | -0,82627868 |  |
| 1561079_at  | ANKRD28        | -0,136301282 | 0,691645685  | -0,82794697 |  |
| 224095_at   | LOC100128175   | -3,114791413 | -2,286583451 | -0,82820796 |  |
| 234148_at   | -              | -0,394749123 | 0,433557298  | -0,82830642 |  |
| 238536_at   | -              | -0,394749123 | 0,433557298  | -0,82830642 |  |
| 1555043_at  | LHFPL5         | -1,838812296 | -1,010192375 | -0,82861992 |  |
| 1555158_at  | -              | -1,838812296 | -1,010192375 | -0,82861992 |  |
| 215914_at   | -              | -1,838812296 | -1,010192375 | -0,82861992 |  |
| 216402_at   | SEC14L4        | -1,838812296 | -1,010192375 | -0,82861992 |  |
| 233990_at   | SMG9           | -1,838812296 | -1,010192375 | -0,82861992 |  |
| 236045_x_at | -              | -1,838812296 | -1,010192375 | -0,82861992 |  |
| 237774_at   | PENK           | -1,838812296 | -1,010192375 | -0,82861992 |  |
| 1561112_at  | -              | -2,866296344 | -2,037551727 | -0,82874462 |  |

|              |                  |              |              |             |  |
|--------------|------------------|--------------|--------------|-------------|--|
| 210698_at    | -                | -2,866296344 | -2,037551727 | -0,82874462 |  |
| 234020_x_at  | -                | -2,866296344 | -2,037551727 | -0,82874462 |  |
| 1553225_s_at | ZNF75D           | -1,026571149 | -0,19610998  | -0,83046117 |  |
| 210237_at    | ARTN             | -0,172274514 | 0,658444279  | -0,83071879 |  |
| 215564_at    | AREG             | -3,287237186 | -2,456406426 | -0,83083076 |  |
| 214015_at    | SOCS7            | -1,089016378 | -0,258114234 | -0,83090214 |  |
| 1555854_at   | AKR1C1 /// AKR1  | -1,688127507 | -0,855751026 | -0,83237648 |  |
| 1561036_at   | -                | -1,688127507 | -0,855751026 | -0,83237648 |  |
| 230515_at    | -                | -1,688127507 | -0,855751026 | -0,83237648 |  |
| 231746_at    | MIXL1            | -1,688127507 | -0,855751026 | -0,83237648 |  |
| 233455_at    | -                | -1,688127507 | -0,855751026 | -0,83237648 |  |
| 238569_at    | GABBR1           | -1,688127507 | -0,855751026 | -0,83237648 |  |
| 1557611_at   | TTLL4            | -1,399512875 | -0,566887459 | -0,83262542 |  |
| 1562691_at   | -                | -1,399512875 | -0,566887459 | -0,83262542 |  |
| 1564763_at   | -                | -1,399512875 | -0,566887459 | -0,83262542 |  |
| 203862_s_at  | ACTN2            | -1,399512875 | -0,566887459 | -0,83262542 |  |
| 219395_at    | ESRP2            | -1,399512875 | -0,566887459 | -0,83262542 |  |
| 234934_at    | -                | -1,399512875 | -0,566887459 | -0,83262542 |  |
| 239908_at    | -                | -1,399512875 | -0,566887459 | -0,83262542 |  |
| 242677_at    | -                | -1,399512875 | -0,566887459 | -0,83262542 |  |
| 1567539_at   | -                | 0,152582607  | 0,987376598  | -0,83479399 |  |
| 239484_at    | TRPM7            | -0,543051993 | 0,293518836  | -0,83657083 |  |
| 223915_at    | BCOR             | 1,129248302  | 1,966439221  | -0,83719092 |  |
| 205038_at    | IKZF1            | 0,376672223  | 1,214517879  | -0,83784566 |  |
| 1553794_at   | STOML3           | -1,888254346 | -1,050406615 | -0,83784773 |  |
| 1555142_at   | SLC9B1           | -1,888254346 | -1,050406615 | -0,83784773 |  |
| 1561484_at   | -                | -1,888254346 | -1,050406615 | -0,83784773 |  |
| 207041_at    | MASP2            | -1,888254346 | -1,050406615 | -0,83784773 |  |
| 234151_at    | -                | -1,888254346 | -1,050406615 | -0,83784773 |  |
| 234176_at    | -                | -1,888254346 | -1,050406615 | -0,83784773 |  |
| 238277_at    | -                | -1,888254346 | -1,050406615 | -0,83784773 |  |
| 1556213_a_at | BTG3             | -1,518072576 | -0,679763839 | -0,83830874 |  |
| 214229_at    | DNAH17           | -1,518072576 | -0,679763839 | -0,83830874 |  |
| 229375_at    | PPIE             | -0,033456564 | 0,805216064  | -0,83867263 |  |
| 1558486_at   | ZNF493           | 0,384950573  | 1,223626587  | -0,83867601 |  |
| 215481_s_at  | PEX5             | -0,83191556  | 0,007421914  | -0,83933747 |  |
| 1553623_at   | MGC15705         | -2,262747984 | -1,423348341 | -0,83939964 |  |
| 206177_s_at  | ARG1             | -2,262747984 | -1,423348341 | -0,83939964 |  |
| 215939_at    | -                | -2,262747984 | -1,423348341 | -0,83939964 |  |
| 216761_at    | -                | -2,262747984 | -1,423348341 | -0,83939964 |  |
| 220218_at    | SPATA6L          | -2,262747984 | -1,423348341 | -0,83939964 |  |
| 229065_at    | SLC35F3          | -2,262747984 | -1,423348341 | -0,83939964 |  |
| 234132_at    | -                | -2,262747984 | -1,423348341 | -0,83939964 |  |
| 236156_at    | LIPA /// LOC1005 | -2,262747984 | -1,423348341 | -0,83939964 |  |
| 236181_at    | LOC389831        | -2,262747984 | -1,423348341 | -0,83939964 |  |
| 237461_at    | NLRP7            | -2,262747984 | -1,423348341 | -0,83939964 |  |
| 240271_at    | -                | -2,262747984 | -1,423348341 | -0,83939964 |  |
| 241182_at    | -                | -2,262747984 | -1,423348341 | -0,83939964 |  |
| 228179_at    | CIRH1A /// HAS3  | -0,148196756 | 0,691645685  | -0,83984244 |  |
| 1564787_at   | ELMOD1 /// LOC   | -0,59053611  | 0,249604176  | -0,84014029 |  |
| 1562815_at   | EFCAB6           | -2,504600601 | -1,663414495 | -0,84118611 |  |
| 218369_s_at  | EXOSC1           | -2,504600601 | -1,663414495 | -0,84118611 |  |
| 228636_at    | BHLHE22          | -2,504600601 | -1,663414495 | -0,84118611 |  |
| 231543_at    | PLEKHA8          | -2,504600601 | -1,663414495 | -0,84118611 |  |
| 243602_at    | MGC40069         | -2,504600601 | -1,663414495 | -0,84118611 |  |
| 231632_at    | C19orf69         | -0,888496123 | -0,046302147 | -0,84219398 |  |

|              |              |              |              |             |  |
|--------------|--------------|--------------|--------------|-------------|--|
| 231653_at    | CCDC129      | -3,054236653 | -2,211750327 | -0,84248633 |  |
| 237420_at    | ODF2L        | -3,054236653 | -2,211750327 | -0,84248633 |  |
| 202485_s_at  | MBD2         | -2,063149277 | -1,220210588 | -0,84293869 |  |
| 207623_at    | ABCF2        | -2,063149277 | -1,220210588 | -0,84293869 |  |
| 214265_at    | ITGA8        | -2,063149277 | -1,220210588 | -0,84293869 |  |
| 221722_x_at  | LZTS1        | -2,063149277 | -1,220210588 | -0,84293869 |  |
| 223870_at    | FBXW10       | -2,063149277 | -1,220210588 | -0,84293869 |  |
| 232356_at    | -            | -2,063149277 | -1,220210588 | -0,84293869 |  |
| 239924_at    | GUSBP11      | -2,063149277 | -1,220210588 | -0,84293869 |  |
| 1560390_s_at | LOC284440    | -2,384869671 | -1,541908042 | -0,84296163 |  |
| 1563165_at   | -            | -2,384869671 | -1,541908042 | -0,84296163 |  |
| 1563681_at   | -            | -2,384869671 | -1,541908042 | -0,84296163 |  |
| 223927_at    | PCDHB9       | -2,384869671 | -1,541908042 | -0,84296163 |  |
| 1553275_s_at | -            | -2,930741289 | -2,086984744 | -0,84375655 |  |
| 1563245_at   | -            | -2,930741289 | -2,086984744 | -0,84375655 |  |
| 1570102_at   | -            | -2,930741289 | -2,086984744 | -0,84375655 |  |
| 234783_at    | -            | -2,930741289 | -2,086984744 | -0,84375655 |  |
| 206810_at    | ZNF44        | -2,756478458 | -1,912089812 | -0,84438865 |  |
| 206455_s_at  | RHO          | -0,622910612 | 0,222599095  | -0,84550971 |  |
| 234206_at    | -            | -1,308181863 | -0,461594427 | -0,84658744 |  |
| 1564490_at   | LOC100128830 | -1,131062212 | -0,283667828 | -0,84739438 |  |
| 234852_at    | -            | -2,712026959 | -1,862647763 | -0,8493792  |  |
| 237586_at    | -            | -2,712026959 | -1,862647763 | -0,8493792  |  |
| 208084_at    | ITGB6        | -1,240169874 | -0,39061235  | -0,84955752 |  |
| 215804_at    | EPHA1        | -1,240169874 | -0,39061235  | -0,84955752 |  |
| 235781_at    | CACNA1B      | -1,240169874 | -0,39061235  | -0,84955752 |  |
| 233478_at    | -            | -0,986356909 | -0,136643983 | -0,84971293 |  |
| 228442_at    | NFATC2       | -0,741668563 | 0,109221392  | -0,85088996 |  |
| 216651_s_at  | GAD2         | -1,763254337 | -0,912331589 | -0,85092275 |  |
| 206642_at    | DSG1         | -3,013665402 | -2,162639771 | -0,85102563 |  |
| 236860_at    | NPY6R        | -3,013665402 | -2,162639771 | -0,85102563 |  |
| 204870_s_at  | PCSK2        | -1,964176657 | -1,112851844 | -0,85132481 |  |
| 220507_s_at  | UPB1         | -1,964176657 | -1,112851844 | -0,85132481 |  |
| 232717_at    | KALRN        | -1,964176657 | -1,112851844 | -0,85132481 |  |
| 235742_at    | RHOC         | -1,964176657 | -1,112851844 | -0,85132481 |  |
| 236099_at    | -            | -1,964176657 | -1,112851844 | -0,85132481 |  |
| 1560277_a_at | LOC283403    | -1,047650486 | -0,19610998  | -0,85154051 |  |
| 233959_at    | ADCY10P1     | -1,047650486 | -0,19610998  | -0,85154051 |  |
| 216736_at    | TM6SF2       | -0,79540287  | 0,059218869  | -0,85462174 |  |
| 1559278_at   | -            | -2,187914861 | -1,332017329 | -0,85589753 |  |
| 221307_at    | KCNIP1       | -2,187914861 | -1,332017329 | -0,85589753 |  |
| 1560282_at   | -            | -2,64318869  | -1,787089803 | -0,85609889 |  |
| 1562752_at   | -            | -2,64318869  | -1,787089803 | -0,85609889 |  |
| 236745_at    | CCDC78       | -2,64318869  | -1,787089803 | -0,85609889 |  |
| 236765_at    | -            | -2,64318869  | -1,787089803 | -0,85609889 |  |
| 240930_at    | CRAMP1L      | -2,64318869  | -1,787089803 | -0,85609889 |  |
| 210815_s_at  | CALCRL       | -1,470833215 | -0,614371577 | -0,85646164 |  |
| 220283_at    | HHIPL2       | -1,470833215 | -0,614371577 | -0,85646164 |  |
| 235049_at    | ADCY1        | -1,470833215 | -0,614371577 | -0,85646164 |  |
| 239986_at    | -            | -1,470833215 | -0,614371577 | -0,85646164 |  |
| 1553058_at   | GIPC3        | -1,424023738 | -0,566887459 | -0,85713628 |  |
| 232292_at    | -            | -1,424023738 | -0,566887459 | -0,85713628 |  |
| 1560460_at   | -            | -3,192553003 | -2,335104118 | -0,85744888 |  |
| 240335_at    | SLC35F5      | -3,192553003 | -2,335104118 | -0,85744888 |  |
| 207057_at    | SLC16A7      | -0,59053611  | 0,26733076   | -0,85786687 |  |
| 230041_at    | LOC100505639 | -0,325749314 | 0,532164371  | -0,85791368 |  |



|              |              |              |              |             |  |
|--------------|--------------|--------------|--------------|-------------|--|
| 232668_at    | -            | -0,089689931 | 0,768343791  | -0,85803372 |  |
| 1560397_s_at | KLHL6        | -0,85085127  | 0,007421914  | -0,85827318 |  |
| 1555415_at   | -            | -1,71423189  | -0,855751026 | -0,85848086 |  |
| 1568682_a_at | -            | -1,71423189  | -0,855751026 | -0,85848086 |  |
| 228806_at    | RORC         | -1,71423189  | -0,855751026 | -0,85848086 |  |
| 239184_at    | -            | -1,71423189  | -0,855751026 | -0,85848086 |  |
| 240795_at    | -            | -1,71423189  | -0,855751026 | -0,85848086 |  |
| 1552770_s_at | ZNF563       | -0,234278768 | 0,624460759  | -0,85873953 |  |
| 236210_at    | -            | -0,234278768 | 0,624460759  | -0,85873953 |  |
| 234648_s_at  | NXF5         | -2,01371626  | -1,154897679 | -0,85881858 |  |
| 240384_at    | -            | -2,01371626  | -1,154897679 | -0,85881858 |  |
| 241561_at    | -            | -2,01371626  | -1,154897679 | -0,85881858 |  |
| 1552553_a_at | NLRC4        | -2,236765673 | -1,377419394 | -0,85934628 |  |
| 215746_at    | -            | -2,236765673 | -1,377419394 | -0,85934628 |  |
| 234056_at    | -            | -2,236765673 | -1,377419394 | -0,85934628 |  |
| 238689_at    | GPR110       | -2,236765673 | -1,377419394 | -0,85934628 |  |
| 1558903_at   | LOC284260    | -2,597496523 | -1,738067356 | -0,85942917 |  |
| 220066_at    | NOD2         | -2,597496523 | -1,738067356 | -0,85942917 |  |
| 224235_at    | -            | -2,597496523 | -1,738067356 | -0,85942917 |  |
| 229347_at    | LOC100505738 | -2,597496523 | -1,738067356 | -0,85942917 |  |
| 243265_at    | GAD2         | -2,597496523 | -1,738067356 | -0,85942917 |  |
| 238327_at    | ODF3B        | -0,83191556  | 0,028364014  | -0,86027957 |  |
| 1553212_at   | KRT78        | -1,591296941 | -0,730778808 | -0,86051813 |  |
| 217683_at    | HBE1         | -1,591296941 | -0,730778808 | -0,86051813 |  |
| 237724_at    | -            | -1,591296941 | -0,730778808 | -0,86051813 |  |
| 239974_at    | LOC728095    | -1,591296941 | -0,730778808 | -0,86051813 |  |
| 219576_at    | MAP7D3       | 0,627515113  | 1,488344553  | -0,86082944 |  |
| 231165_at    | -            | -0,467091869 | 0,393761504  | -0,86085337 |  |
| 229761_at    | LOC440173    | -2,823166348 | -1,961547147 | -0,8616192  |  |
| 230791_at    | -            | -2,823166348 | -1,961547147 | -0,8616192  |  |
| 220498_at    | ACTL7B       | -1,812418401 | -0,950686014 | -0,86173239 |  |
| 237587_at    | -            | -1,812418401 | -0,950686014 | -0,86173239 |  |
| 241281_at    | -            | -1,812418401 | -0,950686014 | -0,86173239 |  |
| 1554748_at   | CLCNKB       | -1,353583928 | -0,490927335 | -0,86265659 |  |
| 220142_at    | HAPLN2       | -1,353583928 | -0,490927335 | -0,86265659 |  |
| 243690_at    | TRIOBP       | -1,353583928 | -0,490927335 | -0,86265659 |  |
| 206427_s_at  | MLANA        | -1,399512875 | -0,536087151 | -0,86342572 |  |
| 229714_at    | HS6ST3       | -1,399512875 | -0,536087151 | -0,86342572 |  |
| 238328_at    | MPRIP        | -1,399512875 | -0,536087151 | -0,86342572 |  |
| 238918_at    | -            | -1,399512875 | -0,536087151 | -0,86342572 |  |
| 232847_at    | SALL3        | -1,543331864 | -0,679763839 | -0,86356803 |  |
| 220758_s_at  | ROBO4        | -0,888496123 | -0,024572586 | -0,86392354 |  |
| 215491_at    | MYCL1        | -0,706943342 | 0,157549243  | -0,86449258 |  |
| 238201_at    | LOC100505786 | -0,706943342 | 0,157549243  | -0,86449258 |  |
| 1554710_at   | KCNMB1       | -2,479842156 | -1,615132408 | -0,86470975 |  |
| 1557241_a_at | -            | -2,479842156 | -1,615132408 | -0,86470975 |  |
| 237925_at    | -            | -2,479842156 | -1,615132408 | -0,86470975 |  |
| 241923_x_at  | NANS         | -2,479842156 | -1,615132408 | -0,86470975 |  |
| 1570224_at   | -            | -2,359436556 | -1,494668682 | -0,86476787 |  |
| 206859_s_at  | PAEP         | -1,2845686   | -0,41858459  | -0,86598401 |  |
| 240553_at    | TESC         | -1,2845686   | -0,41858459  | -0,86598401 |  |
| 242717_at    | -            | -1,2845686   | -0,41858459  | -0,86598401 |  |
| 211874_s_at  | KAT6B        | 0,083054335  | 0,949447784  | -0,86639345 |  |
| 241210_at    | -            | -1,026571149 | -0,160136748 | -0,8664344  |  |
| 1554798_at   | SNED1        | -0,946847173 | -0,079522948 | -0,86732422 |  |
| 1555734_x_at | AP1S3        | -3,15396682  | -2,286583451 | -0,86738337 |  |

|             |              |              |              |             |  |
|-------------|--------------|--------------|--------------|-------------|--|
| 242722_at   | LMO7         | -0,57445847  | 0,293518836  | -0,86797731 |  |
| 1555084_at  | -            | -1,089016378 | -0,220592223 | -0,86842415 |  |
| 238563_at   | -            | -1,089016378 | -0,220592223 | -0,86842415 |  |
| 1553559_at  | TMEM171      | -1,688127507 | -0,819238336 | -0,86888917 |  |
| 1563062_at  | LINC00460    | -1,688127507 | -0,819238336 | -0,86888917 |  |
| 1566831_at  | SBF2-AS1     | -1,688127507 | -0,819238336 | -0,86888917 |  |
| 236332_at   | DHRS7        | -1,688127507 | -0,819238336 | -0,86888917 |  |
| 242177_at   | -            | -1,688127507 | -0,819238336 | -0,86888917 |  |
| 242525_at   | SLC2A5       | -1,688127507 | -0,819238336 | -0,86888917 |  |
| 243841_at   | SYNE2        | -1,688127507 | -0,819238336 | -0,86888917 |  |
| 1561944_at  | -            | -2,089474779 | -1,220210588 | -0,86926419 |  |
| 236640_at   | LOC100507165 | -2,089474779 | -1,220210588 | -0,86926419 |  |
| 222214_at   | -            | -0,741668563 | 0,128747141  | -0,8704157  |  |
| 244285_at   | -            | -0,741668563 | 0,128747141  | -0,8704157  |  |
| 1566898_at  | -            | -2,908843709 | -2,037551727 | -0,87129198 |  |
| 243021_at   | -            | -2,908843709 | -2,037551727 | -0,87129198 |  |
| 1560782_at  | -            | -1,518072576 | -0,646746079 | -0,8713265  |  |
| 203434_s_at | MME          | -1,518072576 | -0,646746079 | -0,8713265  |  |
| 210311_at   | FGF5         | -1,518072576 | -0,646746079 | -0,8713265  |  |
| 219585_at   | CCDC28B      | -1,518072576 | -0,646746079 | -0,8713265  |  |
| 220694_at   | ASAP1-IT1    | 0,57058931   | 1,442269454  | -0,87168014 |  |
| 208258_s_at | GAS2L1       | -0,622910612 | 0,249604176  | -0,87251479 |  |
| 1562723_at  | -            | -1,196375121 | -0,322870281 | -0,87350484 |  |
| 220511_s_at | DLC1         | -1,639579028 | -0,765504029 | -0,874075   |  |
| 224418_x_at | PMCHL1       | -1,639579028 | -0,765504029 | -0,874075   |  |
| 235936_at   | LOC254559    | -1,639579028 | -0,765504029 | -0,874075   |  |
| 1555352_at  | FOXP2        | -2,138804305 | -1,264005341 | -0,87479896 |  |
| 209581_at   | PLA2G16      | -2,138804305 | -1,264005341 | -0,87479896 |  |
| 213040_s_at | NPTXR        | -2,138804305 | -1,264005341 | -0,87479896 |  |
| 213219_at   | ADCY2        | -2,138804305 | -1,264005341 | -0,87479896 |  |
| 214468_at   | MYH6         | -2,138804305 | -1,264005341 | -0,87479896 |  |
| 221353_at   | OR3A1        | -2,138804305 | -1,264005341 | -0,87479896 |  |
| 233498_at   | ERBB4        | -2,138804305 | -1,264005341 | -0,87479896 |  |
| 234475_x_at | CCKBR        | -2,138804305 | -1,264005341 | -0,87479896 |  |
| 235696_at   | -            | -2,138804305 | -1,264005341 | -0,87479896 |  |
| 241144_at   | -            | -0,79540287  | 0,079428135  | -0,87483101 |  |
| 219173_at   | MYO15B       | -0,67289328  | 0,204310755  | -0,87720404 |  |
| 1559142_at  | KAT6A        | -1,888254346 | -1,010192375 | -0,87806197 |  |
| 213841_at   | -            | -1,888254346 | -1,010192375 | -0,87806197 |  |
| 216621_at   | -            | -1,888254346 | -1,010192375 | -0,87806197 |  |
| 221462_x_at | KLK15        | -1,888254346 | -1,010192375 | -0,87806197 |  |
| 230325_at   | LOC100133985 | -1,888254346 | -1,010192375 | -0,87806197 |  |
| 236680_at   | -            | -1,888254346 | -1,010192375 | -0,87806197 |  |
| 241528_at   | MAPK15       | -1,888254346 | -1,010192375 | -0,87806197 |  |
| 211446_at   | RGSL1        | -0,543051993 | 0,336136178  | -0,87918817 |  |
| 230505_at   | LOC145474    | -0,85085127  | 0,028364014  | -0,87921528 |  |
| 240982_at   | CARS         | -0,85085127  | 0,028364014  | -0,87921528 |  |
| 1561369_at  | -            | -2,667025278 | -1,787089803 | -0,87993547 |  |
| 214915_at   | ZNF362       | -2,667025278 | -1,787089803 | -0,87993547 |  |
| 215175_at   | PCNX         | -2,667025278 | -1,787089803 | -0,87993547 |  |
| 215347_at   | -            | -2,667025278 | -1,787089803 | -0,87993547 |  |
| 233628_at   | -            | -2,667025278 | -1,787089803 | -0,87993547 |  |
| 209752_at   | REG1A        | -0,926850548 | -0,046302147 | -0,8805484  |  |
| 236329_at   | SCN8A        | -0,986356909 | -0,102100538 | -0,88425637 |  |
| 1566680_at  | -            | -2,262747984 | -1,377419394 | -0,88532859 |  |
| 234045_x_at | BHLHE23      | -2,262747984 | -1,377419394 | -0,88532859 |  |

|              |                |              |              |             |  |
|--------------|----------------|--------------|--------------|-------------|--|
| 237385_at    | LOC100506126   | -2,262747984 | -1,377419394 | -0,88532859 |  |
| 217522_at    | KCNV2          | -2,972500237 | -2,086984744 | -0,88551549 |  |
| 1562157_at   | -              | -1,937711681 | -1,050406615 | -0,88730507 |  |
| 224860_at    | C9orf123       | -1,937711681 | -1,050406615 | -0,88730507 |  |
| 230369_at    | GPR161         | -1,937711681 | -1,050406615 | -0,88730507 |  |
| 216919_at    | TP53I11        | -1,047650486 | -0,160136748 | -0,88751374 |  |
| 1555629_at   | HAVCR2         | -2,551294263 | -1,663414495 | -0,88787977 |  |
| 1569431_at   | PAFAH1B2       | -2,551294263 | -1,663414495 | -0,88787977 |  |
| 207037_at    | TNFRSF11A      | -2,551294263 | -1,663414495 | -0,88787977 |  |
| 231103_at    | KCNN3          | -2,551294263 | -1,663414495 | -0,88787977 |  |
| 241111_at    | HSD3B1         | -2,551294263 | -1,663414495 | -0,88787977 |  |
| 206711_at    | CXorf1         | -2,311268652 | -1,423348341 | -0,88792031 |  |
| 213068_at    | DPT            | -2,311268652 | -1,423348341 | -0,88792031 |  |
| 226673_at    | SH2D3C         | -2,311268652 | -1,423348341 | -0,88792031 |  |
| 1560399_a_at | OTUD7A         | -1,424023738 | -0,536087151 | -0,88793659 |  |
| 205720_at    | POMC           | -1,424023738 | -0,536087151 | -0,88793659 |  |
| 220531_at    | -              | -1,424023738 | -0,536087151 | -0,88793659 |  |
| 227269_s_at  | RAB40C         | -1,424023738 | -0,536087151 | -0,88793659 |  |
| 243097_x_at  | -              | -1,424023738 | -0,536087151 | -0,88793659 |  |
| 212713_at    | MFAP4          | -1,838812296 | -0,950686014 | -0,88812628 |  |
| 1561306_s_at | STRC           | -0,759588698 | 0,128747141  | -0,88833584 |  |
| 220041_at    | PIGZ           | -0,299034815 | 0,589657387  | -0,8886922  |  |
| 231596_at    | -              | -0,299034815 | 0,589657387  | -0,8886922  |  |
| 1555173_at   | STX19          | -2,504600601 | -1,615132408 | -0,88946819 |  |
| 206104_at    | ISL1           | -2,504600601 | -1,615132408 | -0,88946819 |  |
| 214432_at    | ATP1A3         | -2,504600601 | -1,615132408 | -0,88946819 |  |
| 207784_at    | ARSD           | -1,308181863 | -0,41858459  | -0,88959727 |  |
| 230395_at    | -              | -1,308181863 | -0,41858459  | -0,88959727 |  |
| 213611_at    | AQP5           | -1,026571149 | -0,136643983 | -0,88992717 |  |
| 232671_at    | SLFN1-AS1      | -1,026571149 | -0,136643983 | -0,88992717 |  |
| 234273_at    | -              | -1,173767127 | -0,283667828 | -0,8900993  |  |
| 1552830_at   | FBXO39         | -2,384869671 | -1,494668682 | -0,89020099 |  |
| 1564802_at   | -              | -2,384869671 | -1,494668682 | -0,89020099 |  |
| 207940_x_at  | CNR1           | -0,622910612 | 0,26733076   | -0,89024137 |  |
| 241087_at    | -              | -0,622910612 | 0,26733076   | -0,89024137 |  |
| 1561102_at   | -              | -1,240169874 | -0,34958478  | -0,89058509 |  |
| 214926_at    | SPTAN1         | -1,240169874 | -0,34958478  | -0,89058509 |  |
| 239313_at    | LOC401320      | -1,240169874 | -0,34958478  | -0,89058509 |  |
| 1559976_at   | LOC100506314   | -2,43257096  | -1,541908042 | -0,89066292 |  |
| 1566951_at   | -              | -2,43257096  | -1,541908042 | -0,89066292 |  |
| 228325_at    | KIAA0146       | -2,43257096  | -1,541908042 | -0,89066292 |  |
| 234646_at    | -              | -2,43257096  | -1,541908042 | -0,89066292 |  |
| 240407_at    | LOC100126784   | -2,43257096  | -1,541908042 | -0,89066292 |  |
| 242926_at    | -              | -2,43257096  | -1,541908042 | -0,89066292 |  |
| 214027_x_at  | DES /// FAM48A | -0,83191556  | 0,059218869  | -0,89113443 |  |
| 208330_at    | ALX4           | -1,089016378 | -0,19610998  | -0,8929064  |  |
| 1559992_a_at | LOC100505967   | -2,930741289 | -2,037551727 | -0,89318956 |  |
| 1568817_at   | -              | -2,930741289 | -2,037551727 | -0,89318956 |  |
| 232888_at    | ISM1           | -2,930741289 | -2,037551727 | -0,89318956 |  |
| 210936_at    | WDR1           | -0,221656139 | 0,67181667   | -0,89347281 |  |
| 1555110_a_at | KLHL3          | -2,756478458 | -1,862647763 | -0,8938307  |  |
| 1555423_at   | SSH2           | -2,756478458 | -1,862647763 | -0,8938307  |  |
| 1561650_s_at | LOC285692      | -2,756478458 | -1,862647763 | -0,8938307  |  |
| 233770_at    | -              | -2,756478458 | -1,862647763 | -0,8938307  |  |
| 242676_at    | -              | -2,756478458 | -1,862647763 | -0,8938307  |  |
| 210575_at    | NUDC           | -1,2845686   | -0,39061235  | -0,89395625 |  |

|              |              |              |              |             |  |
|--------------|--------------|--------------|--------------|-------------|--|
| 236225_at    | GGT6         | -1,2845686   | -0,39061235  | -0,89395625 |  |
| 1553151_at   | ATP6V0D2     | -1,71423189  | -0,819238336 | -0,89499355 |  |
| 1558475_at   | -            | -1,71423189  | -0,819238336 | -0,89499355 |  |
| 1561928_s_at | ANKUB1       | -1,71423189  | -0,819238336 | -0,89499355 |  |
| 217510_at    | CRX          | -1,71423189  | -0,819238336 | -0,89499355 |  |
| 221388_at    | OR1A1        | -1,71423189  | -0,819238336 | -0,89499355 |  |
| 223813_at    | PRND         | -1,71423189  | -0,819238336 | -0,89499355 |  |
| 226560_at    | -            | -1,71423189  | -0,819238336 | -0,89499355 |  |
| 236525_at    | FBXO36       | -0,888496123 | 0,007421914  | -0,89591804 |  |
| 208610_s_at  | SRRM2        | 2,094906514  | 2,990953566  | -0,89604705 |  |
| 1557588_at   | LOC100128946 | -0,172274514 | 0,724100169  | -0,89637468 |  |
| 204039_at    | CEBPA        | 0,133056859  | 1,029536893  | -0,89648003 |  |
| 220882_at    | -            | -1,543331864 | -0,646746079 | -0,89658579 |  |
| 243276_at    | ALS2CL       | -1,543331864 | -0,646746079 | -0,89658579 |  |
| 243944_at    | -            | -0,259832361 | 0,638150376  | -0,89798274 |  |
| 1553511_at   | GJD3         | -0,741668563 | 0,157549243  | -0,89921781 |  |
| 231398_at    | SLC22A7      | -1,812418401 | -0,912331589 | -0,90008681 |  |
| 234719_at    | LAMA3        | -1,812418401 | -0,912331589 | -0,90008681 |  |
| 242461_at    | -            | -1,812418401 | -0,912331589 | -0,90008681 |  |
| 204616_at    | UCHL3        | 3,678566904  | 4,578781665  | -0,90021476 |  |
| 242441_at    | -            | -0,946847173 | -0,046302147 | -0,90054503 |  |
| 1553705_a_at | CHRM3        | -2,01371626  | -1,112851844 | -0,90086442 |  |
| 205285_s_at  | FYB          | -2,01371626  | -1,112851844 | -0,90086442 |  |
| 208387_s_at  | MMP24        | -2,01371626  | -1,112851844 | -0,90086442 |  |
| 231129_at    | LOC728012    | -2,01371626  | -1,112851844 | -0,90086442 |  |
| 236732_at    | -            | -2,01371626  | -1,112851844 | -0,90086442 |  |
| 238407_at    | -            | -2,01371626  | -1,112851844 | -0,90086442 |  |
| 244600_at    | -            | -2,01371626  | -1,112851844 | -0,90086442 |  |
| 210075_at    | 02.03.15     | 0,03125738   | 0,932882274  | -0,90162489 |  |
| 1562346_at   | -            | -0,423248115 | 0,479907041  | -0,90315516 |  |
| 1555763_x_at | MKL1         | -1,518072576 | -0,614371577 | -0,903701   |  |
| 1565595_at   | -            | -1,518072576 | -0,614371577 | -0,903701   |  |
| 214667_s_at  | TP53I11      | -1,518072576 | -0,614371577 | -0,903701   |  |
| 217031_at    | KRT84        | -1,518072576 | -0,614371577 | -0,903701   |  |
| 1557621_at   | KCP          | -1,470833215 | -0,566887459 | -0,90394576 |  |
| 204197_s_at  | RUNX3        | -1,470833215 | -0,566887459 | -0,90394576 |  |
| 207213_s_at  | USP2         | -1,470833215 | -0,566887459 | -0,90394576 |  |
| 235403_at    | -            | -1,470833215 | -0,566887459 | -0,90394576 |  |
| 237491_at    | -            | -1,470833215 | -0,566887459 | -0,90394576 |  |
| 1570293_at   | TBL1X        | -0,79540287  | 0,109221392  | -0,90462426 |  |
| 1561035_at   | -            | -2,236765673 | -1,332017329 | -0,90474834 |  |
| 1566880_at   | -            | -2,236765673 | -1,332017329 | -0,90474834 |  |
| 215046_at    | KANSL1L      | -2,236765673 | -1,332017329 | -0,90474834 |  |
| 240203_at    | -            | -2,236765673 | -1,332017329 | -0,90474834 |  |
| 243570_at    | SPCS2        | -2,236765673 | -1,332017329 | -0,90474834 |  |
| 1558830_at   | -            | -2,866296344 | -1,961547147 | -0,9047492  |  |
| 233388_at    | -            | -2,866296344 | -1,961547147 | -0,9047492  |  |
| 1553882_at   | -            | -2,64318869  | -1,738067356 | -0,90512133 |  |
| 1566550_at   | -            | -2,64318869  | -1,738067356 | -0,90512133 |  |
| 211154_at    | THPO         | -2,64318869  | -1,738067356 | -0,90512133 |  |
| 215319_at    | ATP8B3       | -2,64318869  | -1,738067356 | -0,90512133 |  |
| 215554_at    | GPLD1        | -2,64318869  | -1,738067356 | -0,90512133 |  |
| 230802_at    | ARHGAP24     | -2,64318869  | -1,738067356 | -0,90512133 |  |
| 1557194_a_at | -            | -0,089689931 | 0,817300337  | -0,90699027 |  |
| 230086_at    | FNBP1        | -1,763254337 | -0,855751026 | -0,90750331 |  |
| 1570169_at   | CSMD2        | -2,063149277 | -1,154897679 | -0,9082516  |  |

|              |                |              |              |             |  |
|--------------|----------------|--------------|--------------|-------------|--|
| 207951_at    | CSN2           | -2,063149277 | -1,154897679 | -0,9082516  |  |
| 227803_at    | ENPP5          | -2,063149277 | -1,154897679 | -0,9082516  |  |
| 229927_at    | LEMD1          | -2,063149277 | -1,154897679 | -0,9082516  |  |
| 243018_at    | -              | -2,063149277 | -1,154897679 | -0,9082516  |  |
| 228232_s_at  | VSIG2          | -1,399512875 | -0,490927335 | -0,90858554 |  |
| 242505_at    | -              | -1,399512875 | -0,490927335 | -0,90858554 |  |
| 1554069_at   | EPHA8          | -1,639579028 | -0,730778808 | -0,90880022 |  |
| 211679_x_at  | GABBR2         | -1,639579028 | -0,730778808 | -0,90880022 |  |
| 231802_at    | CLEC3A         | -1,639579028 | -0,730778808 | -0,90880022 |  |
| 236445_at    | -              | -1,131062212 | -0,220592223 | -0,91046999 |  |
| 1555155_at   | MLLT6          | -1,047650486 | -0,136643983 | -0,9110065  |  |
| 1564491_at   | SPANXA2-OT1    | -2,823166348 | -1,912089812 | -0,91107654 |  |
| 236962_at    | -              | -2,823166348 | -1,912089812 | -0,91107654 |  |
| 240285_at    | AQP2           | -2,823166348 | -1,912089812 | -0,91107654 |  |
| 243162_at    | -              | -2,823166348 | -1,912089812 | -0,91107654 |  |
| 203684_s_at  | BCL2           | -0,83191556  | 0,079428135  | -0,9113437  |  |
| 220050_at    | C9orf9         | -0,83191556  | 0,079428135  | -0,9113437  |  |
| 226664_at    | TBC1D20        | 0,822971223  | 1,73441697   | -0,91144575 |  |
| 221659_s_at  | MYL10          | -1,591296941 | -0,679763839 | -0,9115331  |  |
| 234121_at    | LOC100129069   | -1,591296941 | -0,679763839 | -0,9115331  |  |
| 243886_at    | -              | -1,591296941 | -0,679763839 | -0,9115331  |  |
| 1564819_at   | -              | -3,07502285  | -2,162639771 | -0,91238308 |  |
| 237304_at    | SYCE2          | -1,196375121 | -0,283667828 | -0,91270729 |  |
| 1560633_a_at | C21orf91-OT1   | -1,964176657 | -1,050406615 | -0,91377004 |  |
| 1560750_at   | LOC151121      | -1,964176657 | -1,050406615 | -0,91377004 |  |
| 209840_s_at  | LRRN3          | -1,964176657 | -1,050406615 | -0,91377004 |  |
| 233152_x_at  | -              | 0,072842263  | 0,987376598  | -0,91453433 |  |
| 234180_at    | -              | -3,250025915 | -2,335104118 | -0,9149218  |  |
| 223415_at    | RPP25          | 0,503742507  | 1,418668082  | -0,91492558 |  |
| 231619_at    | -              | -1,173767127 | -0,258114234 | -0,91565289 |  |
| 210567_s_at  | SKP2           | 0,627515113  | 1,543943227  | -0,91642811 |  |
| 228214_at    | SOX6           | -0,148196756 | 0,768343791  | -0,91654055 |  |
| 232288_at    | PDXDC1 /// PDX | -2,779459409 | -1,862647763 | -0,91681165 |  |
| 237481_at    | ACAD10         | -2,779459409 | -1,862647763 | -0,91681165 |  |
| 214361_s_at  | RGS12          | -1,308181863 | -0,39061235  | -0,91756951 |  |
| 217180_at    | -              | -0,741668563 | 0,176436073  | -0,91810464 |  |
| 222810_s_at  | RASAL2         | -0,741668563 | 0,176436073  | -0,91810464 |  |
| 230374_at    | -              | -0,741668563 | 0,176436073  | -0,91810464 |  |
| 1556905_at   | ZNF577         | -2,138804305 | -1,220210588 | -0,91859372 |  |
| 1569138_a_at | SRCAP          | -0,196756757 | 0,724100169  | -0,92085693 |  |
| 208163_s_at  | OSBPL7         | -0,946847173 | -0,024572586 | -0,92227459 |  |
| 224485_s_at  | SLC30A2        | -0,946847173 | -0,024572586 | -0,92227459 |  |
| 241374_at    | TMEM39A        | -0,946847173 | -0,024572586 | -0,92227459 |  |
| 1552796_a_at | SIM1           | -1,688127507 | -0,765504029 | -0,92262348 |  |
| 204810_s_at  | CKM            | -1,688127507 | -0,765504029 | -0,92262348 |  |
| 216734_s_at  | CXCR5          | -1,688127507 | -0,765504029 | -0,92262348 |  |
| 221581_s_at  | LAT2           | -1,688127507 | -0,765504029 | -0,92262348 |  |
| 229239_x_at  | SLCO4A1        | -1,688127507 | -0,765504029 | -0,92262348 |  |
| 237604_at    | -              | -1,688127507 | -0,765504029 | -0,92262348 |  |
| 1556540_a_at | -              | -0,299034815 | 0,624460759  | -0,92349557 |  |
| 206930_at    | GLYAT          | -2,187914861 | -1,264005341 | -0,92390952 |  |
| 209351_at    | KRT14          | -2,187914861 | -1,264005341 | -0,92390952 |  |
| 235171_at    | LOC100505501   | -2,187914861 | -1,264005341 | -0,92390952 |  |
| 237387_at    | -              | -2,187914861 | -1,264005341 | -0,92390952 |  |
| 228691_at    | -              | -0,79540287  | 0,128747141  | -0,92415001 |  |
| 1570496_at   | -              | -2,712026959 | -1,787089803 | -0,92493716 |  |

|              |                |              |              |             |  |
|--------------|----------------|--------------|--------------|-------------|--|
| 232496_at    | -              | -2,712026959 | -1,787089803 | -0,92493716 |  |
| 242320_at    | -              | 1,011212064  | 1,936283387  | -0,92507132 |  |
| 1555219_at   | RGR            | -1,838812296 | -0,912331589 | -0,92648071 |  |
| 1558077_s_at | MDH1B          | -1,838812296 | -0,912331589 | -0,92648071 |  |
| 1559623_at   | C11orf54       | -1,838812296 | -0,912331589 | -0,92648071 |  |
| 1562009_a_at | -              | -3,013665402 | -2,086984744 | -0,92668066 |  |
| 241773_at    | -              | -3,013665402 | -2,086984744 | -0,92668066 |  |
| 242641_at    | COL6A6         | -3,013665402 | -2,086984744 | -0,92668066 |  |
| 209552_at    | PAX8           | -0,57445847  | 0,352836757  | -0,92729523 |  |
| 207251_at    | MEP1B          | -1,937711681 | -1,010192375 | -0,92751931 |  |
| 222071_s_at  | SLCO4C1        | -1,937711681 | -1,010192375 | -0,92751931 |  |
| 211387_x_at  | RNGTT          | 0,317354302  | 1,246149888  | -0,92879559 |  |
| 223867_at    | TEKT3          | -2,667025278 | -1,738067356 | -0,92895792 |  |
| 233529_at    | -              | -2,667025278 | -1,738067356 | -0,92895792 |  |
| 204309_at    | CYP11A1        | -1,543331864 | -0,614371577 | -0,92896029 |  |
| 229176_at    | ANKH           | -1,543331864 | -0,614371577 | -0,92896029 |  |
| 1562836_at   | DDX6           | 0,57058931   | 1,499637023  | -0,92904771 |  |
| 228451_at    | LOC100128071   | -0,706943342 | 0,222599095  | -0,92954244 |  |
| 219658_at    | PTCD2          | -0,512251684 | 0,417770464  | -0,93002215 |  |
| 232423_at    | ARSD           | -2,262747984 | -1,332017329 | -0,93073066 |  |
| 233356_at    | -              | -2,262747984 | -1,332017329 | -0,93073066 |  |
| 236929_at    | LOC441242      | -2,262747984 | -1,332017329 | -0,93073066 |  |
| 240049_at    | -              | -2,262747984 | -1,332017329 | -0,93073066 |  |
| 204551_s_at  | AHSG           | -1,424023738 | -0,490927335 | -0,9330964  |  |
| 1569385_s_at | TET2           | -2,311268652 | -1,377419394 | -0,93384926 |  |
| 230373_at    | LOC100505483   | -2,311268652 | -1,377419394 | -0,93384926 |  |
| 243363_at    | LEF1-AS1       | -2,311268652 | -1,377419394 | -0,93384926 |  |
| 1562983_at   | LOC441025      | -2,597496523 | -1,663414495 | -0,93408203 |  |
| 231088_at    | LOC340544      | -2,597496523 | -1,663414495 | -0,93408203 |  |
| 235891_at    | DNM3OS /// MIR | -2,597496523 | -1,663414495 | -0,93408203 |  |
| 239559_at    | -              | -2,597496523 | -1,663414495 | -0,93408203 |  |
| 244677_at    | -              | -2,597496523 | -1,663414495 | -0,93408203 |  |
| 213146_at    | KDM6B          | -0,926850548 | 0,007421914  | -0,93427246 |  |
| 1566558_x_at | FLJ90757       | 0,627515113  | 1,562009954  | -0,93449484 |  |
| 1555231_a_at | C21orf88       | -2,089474779 | -1,154897679 | -0,9345771  |  |
| 224398_at    | -              | -2,089474779 | -1,154897679 | -0,9345771  |  |
| 232559_at    | -              | -2,089474779 | -1,154897679 | -0,9345771  |  |
| 235583_at    | ILDR1          | -2,089474779 | -1,154897679 | -0,9345771  |  |
| 241872_at    | -              | -2,089474779 | -1,154897679 | -0,9345771  |  |
| 235229_at    | -              | -2,972500237 | -2,037551727 | -0,93494851 |  |
| 1562411_at   | MYLK3          | -1,131062212 | -0,19610998  | -0,93495223 |  |
| 201387_s_at  | UCHL1          | -1,131062212 | -0,19610998  | -0,93495223 |  |
| 226248_s_at  | KIAA1324       | -1,131062212 | -0,19610998  | -0,93495223 |  |
| 214447_at    | ETS1           | -1,2845686   | -0,34958478  | -0,93498382 |  |
| 1561214_at   | -              | -1,353583928 | -0,41858459  | -0,93499934 |  |
| 222643_s_at  | BBS1           | -1,353583928 | -0,41858459  | -0,93499934 |  |
| 1553835_a_at | COL6A5         | -2,359436556 | -1,423348341 | -0,93608821 |  |
| 1561307_at   | -              | -2,359436556 | -1,423348341 | -0,93608821 |  |
| 215837_x_at  | -              | -2,359436556 | -1,423348341 | -0,93608821 |  |
| 217287_s_at  | TRPC6          | -2,359436556 | -1,423348341 | -0,93608821 |  |
| 230939_at    | -              | -2,359436556 | -1,423348341 | -0,93608821 |  |
| 234894_at    | ITIH6          | -2,359436556 | -1,423348341 | -0,93608821 |  |
| 1556504_at   | -              | -2,551294263 | -1,615132408 | -0,93616186 |  |
| 220994_s_at  | STXBP6         | -2,551294263 | -1,615132408 | -0,93616186 |  |
| 234197_at    | ACSM1          | -1,888254346 | -0,950686014 | -0,93756833 |  |
| 237498_at    | NEDD4L         | -1,888254346 | -0,950686014 | -0,93756833 |  |

|              |                  |              |              |             |  |
|--------------|------------------|--------------|--------------|-------------|--|
| 237683_s_at  | -                | -1,888254346 | -0,950686014 | -0,93756833 |  |
| 243874_at    | -                | -1,888254346 | -0,950686014 | -0,93756833 |  |
| 243985_at    | GTF2A2           | -1,888254346 | -0,950686014 | -0,93756833 |  |
| 244366_at    | LOC100506371     | -1,888254346 | -0,950686014 | -0,93756833 |  |
| 1566037_at   | DGCR7            | -2,43257096  | -1,494668682 | -0,93790228 |  |
| 230067_at    | FAM124A          | -2,43257096  | -1,494668682 | -0,93790228 |  |
| 231891_at    | STAMBPL1         | -2,43257096  | -1,494668682 | -0,93790228 |  |
| 1555266_a_at | ASXL2            | -1,399512875 | -0,461594427 | -0,93791845 |  |
| 1563068_at   | -                | -1,399512875 | -0,461594427 | -0,93791845 |  |
| 1565618_at   | KIAA1671         | -1,399512875 | -0,461594427 | -0,93791845 |  |
| 1560260_at   | LOC285593        | -2,479842156 | -1,541908042 | -0,93793411 |  |
| 1566840_at   | LOC283674        | -2,479842156 | -1,541908042 | -0,93793411 |  |
| 209942_x_at  | MAGEA3           | -2,479842156 | -1,541908042 | -0,93793411 |  |
| 221278_at    | HOXB8            | -2,479842156 | -1,541908042 | -0,93793411 |  |
| 243208_x_at  | ACTL9            | -2,479842156 | -1,541908042 | -0,93793411 |  |
| 240505_at    | -                | -1,196375121 | -0,258114234 | -0,93826089 |  |
| 236776_at    | -                | -0,986356909 | -0,046302147 | -0,94005476 |  |
| 1555608_at   | CAPRIN2          | -0,423248115 | 0,51742585   | -0,94067397 |  |
| 233265_at    | -                | -0,83191556  | 0,109221392  | -0,94113695 |  |
| 1552687_a_at | C20orf152        | -1,763254337 | -0,819238336 | -0,944016   |  |
| 1553895_at   | C11orf42         | -1,763254337 | -0,819238336 | -0,944016   |  |
| 205650_s_at  | FGA              | -1,763254337 | -0,819238336 | -0,944016   |  |
| 211589_at    | PML              | -1,591296941 | -0,646746079 | -0,94455086 |  |
| 221566_s_at  | NOL3             | -1,591296941 | -0,646746079 | -0,94455086 |  |
| 237740_at    | -                | -1,591296941 | -0,646746079 | -0,94455086 |  |
| 240756_at    | -                | -1,591296941 | -0,646746079 | -0,94455086 |  |
| 237230_at    | GPHA2            | -0,741668563 | 0,204310755  | -0,94597932 |  |
| 219309_at    | C22orf46         | -1,026571149 | -0,079522948 | -0,9470482  |  |
| 229937_x_at  | -                | -2,908843709 | -1,961547147 | -0,94729656 |  |
| 225977_at    | PCDH18           | -0,888496123 | 0,059218869  | -0,94771499 |  |
| 240971_x_at  | -                | -0,888496123 | 0,059218869  | -0,94771499 |  |
| 1561224_at   | -                | -1,71423189  | -0,765504029 | -0,94872786 |  |
| 207841_at    | SPIN2A           | -1,71423189  | -0,765504029 | -0,94872786 |  |
| 229922_at    | GPRIN1           | -1,71423189  | -0,765504029 | -0,94872786 |  |
| 238311_at    | -                | -1,71423189  | -0,765504029 | -0,94872786 |  |
| 240534_at    | -                | -1,71423189  | -0,765504029 | -0,94872786 |  |
| 241294_at    | -                | -1,71423189  | -0,765504029 | -0,94872786 |  |
| 215434_x_at  | LOC100288142 /   | 0,648296226  | 1,59747851   | -0,94918228 |  |
| 1554188_at   | C11orf53         | -0,325749314 | 0,624460759  | -0,95021007 |  |
| 202177_at    | GAS6             | -2,063149277 | -1,112851844 | -0,95029743 |  |
| 207587_at    | CRYGA            | -2,063149277 | -1,112851844 | -0,95029743 |  |
| 231190_at    | LOC100653171 /   | -2,063149277 | -1,112851844 | -0,95029743 |  |
| 1554541_a_at | GPRIN2           | -1,518072576 | -0,566887459 | -0,95118512 |  |
| 205007_s_at  | CIB2             | -1,518072576 | -0,566887459 | -0,95118512 |  |
| 208426_x_at  | KIR2DL2 /// KIR2 | -1,518072576 | -0,566887459 | -0,95118512 |  |
| 238636_at    | CACNA1C          | -1,518072576 | -0,566887459 | -0,95118512 |  |
| 239158_at    | -                | -1,518072576 | -0,566887459 | -0,95118512 |  |
| 1555404_a_at | DUOXA1           | -0,259832361 | 0,691645685  | -0,95147805 |  |
| 230916_at    | NODAL            | -0,57445847  | 0,377530647  | -0,95198912 |  |
| 1556901_s_at | LOC149773        | -3,114791413 | -2,162639771 | -0,95215164 |  |
| 235464_at    | CSNK1A1          | -1,089016378 | -0,136643983 | -0,9523724  |  |
| 239561_at    | -                | -1,089016378 | -0,136643983 | -0,9523724  |  |
| 235690_at    | ZNF594           | 0,152582607  | 1,105412836  | -0,95283023 |  |
| 244264_at    | KLRG2            | -0,79540287  | 0,157549243  | -0,95295211 |  |
| 1569750_at   | -                | -1,964176657 | -1,010192375 | -0,95398428 |  |
| 228481_at    | -                | -1,964176657 | -1,010192375 | -0,95398428 |  |

|              |                 |              |              |             |  |
|--------------|-----------------|--------------|--------------|-------------|--|
| 1553635_s_at | TCTEX1D1        | -2,866296344 | -1,912089812 | -0,95420653 |  |
| 1557448_a_at | -               | -2,866296344 | -1,912089812 | -0,95420653 |  |
| 211690_at    | RPS6            | -2,866296344 | -1,912089812 | -0,95420653 |  |
| 233253_at    | -               | -2,866296344 | -1,912089812 | -0,95420653 |  |
| 1552555_at   | PRSS36          | -0,946847173 | 0,007421914  | -0,95426909 |  |
| 1553349_at   | ARID2           | -0,946847173 | 0,007421914  | -0,95426909 |  |
| 208226_x_at  | ADAM22          | -0,946847173 | 0,007421914  | -0,95426909 |  |
| 229457_at    | ANKHD1          | -0,946847173 | 0,007421914  | -0,95426909 |  |
| 244010_at    | -               | -0,946847173 | 0,007421914  | -0,95426909 |  |
| 1555702_a_at | ST3GAL3         | -0,926850548 | 0,028364014  | -0,95521456 |  |
| 1553255_at   | ERVV-1          | -1,812418401 | -0,855751026 | -0,95666737 |  |
| 217104_at    | ST20            | -1,688127507 | -0,730778808 | -0,9573487  |  |
| 240405_at    | -               | -1,688127507 | -0,730778808 | -0,9573487  |  |
| 1561587_at   | LOC284260       | -1,308181863 | -0,34958478  | -0,95859708 |  |
| 202350_s_at  | LOC100506558 /  | -1,639579028 | -0,679763839 | -0,95981519 |  |
| 204895_x_at  | MUC4            | -1,639579028 | -0,679763839 | -0,95981519 |  |
| 205826_at    | MYOM2           | -1,639579028 | -0,679763839 | -0,95981519 |  |
| 1561103_at   | -               | -2,823166348 | -1,862647763 | -0,96051859 |  |
| 1558612_a_at | ATP1A4          | -2,384869671 | -1,423348341 | -0,96152133 |  |
| 211353_at    | LRIT1           | -2,384869671 | -1,423348341 | -0,96152133 |  |
| 220429_at    | NDST3           | -2,384869671 | -1,423348341 | -0,96152133 |  |
| 233666_at    | TMEM106B        | -2,384869671 | -1,423348341 | -0,96152133 |  |
| 231089_at    | LOC100505664    | -1,2845686   | -0,322870281 | -0,96169832 |  |
| 233131_at    | CCDC147         | -1,2845686   | -0,322870281 | -0,96169832 |  |
| 205470_s_at  | KLK11           | -0,986356909 | -0,024572586 | -0,96178432 |  |
| 211295_x_at  | CYP2A6          | -0,467091869 | 0,495031851  | -0,96212372 |  |
| 1559401_a_at | -               | -1,424023738 | -0,461594427 | -0,96242931 |  |
| 212679_at    | TBL2            | -1,424023738 | -0,461594427 | -0,96242931 |  |
| 1559406_at   | ANKRD18A        | -2,504600601 | -1,541908042 | -0,96269256 |  |
| 208240_s_at  | FGF1            | -2,504600601 | -1,541908042 | -0,96269256 |  |
| 238836_at    | -               | -2,504600601 | -1,541908042 | -0,96269256 |  |
| 1561252_at   | LOC648691       | -1,353583928 | -0,39061235  | -0,96297158 |  |
| 205829_at    | HSD17B1         | -1,353583928 | -0,39061235  | -0,96297158 |  |
| 221275_s_at  | -               | -1,353583928 | -0,39061235  | -0,96297158 |  |
| 232733_s_at  | COL20A1         | -1,353583928 | -0,39061235  | -0,96297158 |  |
| 1553432_s_at | LOC653786 /// O | -2,01371626  | -1,050406615 | -0,96330965 |  |
| 1553529_at   | TAS1R2          | -2,01371626  | -1,050406615 | -0,96330965 |  |
| 221164_x_at  | CHST5           | 0,228146222  | 1,191491281  | -0,96334506 |  |
| 205236_x_at  | SOD3            | -0,759588698 | 0,204310755  | -0,96389945 |  |
| 241910_x_at  | LOC100507904    | -0,148196756 | 0,817300337  | -0,96549709 |  |
| 208022_s_at  | CDC14B          | -0,67289328  | 0,293518836  | -0,96641212 |  |
| 233217_at    | -               | -0,67289328  | 0,293518836  | -0,96641212 |  |
| 1558430_at   | -               | -2,187914861 | -1,220210588 | -0,96770427 |  |
| 1563297_s_at | -               | -2,187914861 | -1,220210588 | -0,96770427 |  |
| 1565666_s_at | MUC6            | -2,187914861 | -1,220210588 | -0,96770427 |  |
| 214415_at    | PLGLA /// PLGLE | -2,187914861 | -1,220210588 | -0,96770427 |  |
| 230960_at    | IGDCC3          | -2,187914861 | -1,220210588 | -0,96770427 |  |
| 243884_at    | TEX26           | -2,187914861 | -1,220210588 | -0,96770427 |  |
| 228473_at    | MSX1            | -1,047650486 | -0,079522948 | -0,96812754 |  |
| 222598_s_at  | NAV2            | -0,512251684 | 0,456918297  | -0,96916998 |  |
| 1552538_a_at | KIF6            | -2,756478458 | -1,787089803 | -0,96938865 |  |
| 231807_at    | KIAA1217        | -2,756478458 | -1,787089803 | -0,96938865 |  |
| 1558338_at   | SEMA6A          | -2,236765673 | -1,264005341 | -0,97276033 |  |
| 1559712_at   | LOC154822       | -2,236765673 | -1,264005341 | -0,97276033 |  |
| 1563531_at   | -               | -2,236765673 | -1,264005341 | -0,97276033 |  |
| 213825_at    | OLIG2           | -2,236765673 | -1,264005341 | -0,97276033 |  |



|              |                 |              |              |             |  |
|--------------|-----------------|--------------|--------------|-------------|--|
| 216767_at    | -               | -2,236765673 | -1,264005341 | -0,97276033 |  |
| 220814_at    | -               | -2,236765673 | -1,264005341 | -0,97276033 |  |
| 228018_at    | NKAIN4          | -2,236765673 | -1,264005341 | -0,97276033 |  |
| 232992_at    | SAYSD1          | -2,236765673 | -1,264005341 | -0,97276033 |  |
| 243069_at    | -               | -2,236765673 | -1,264005341 | -0,97276033 |  |
| 1563496_at   | STL             | -2,712026959 | -1,738067356 | -0,9739596  |  |
| 210979_at    | ASAH1           | -2,712026959 | -1,738067356 | -0,9739596  |  |
| 241651_at    | -               | -2,712026959 | -1,738067356 | -0,9739596  |  |
| 243902_at    | -               | -2,712026959 | -1,738067356 | -0,9739596  |  |
| 1553871_at   | CSNK1G2-AS1     | -0,706943342 | 0,26733076   | -0,9742741  |  |
| 233537_at    | KRTAP3-1        | -0,706943342 | 0,26733076   | -0,9742741  |  |
| 1563949_at   | -               | -0,946847173 | 0,028364014  | -0,97521119 |  |
| 202489_s_at  | FXYD3           | -0,946847173 | 0,028364014  | -0,97521119 |  |
| 233997_at    | LOC100287166    | -0,946847173 | 0,028364014  | -0,97521119 |  |
| 241010_x_at  | -               | -0,622910612 | 0,352836757  | -0,97574737 |  |
| 210553_x_at  | LOC100507472 /  | -1,196375121 | -0,220592223 | -0,9757829  |  |
| 1560449_at   | -               | -1,888254346 | -0,912331589 | -0,97592276 |  |
| 207693_at    | CACNB4          | -1,888254346 | -0,912331589 | -0,97592276 |  |
| 242380_at    | -               | -1,888254346 | -0,912331589 | -0,97592276 |  |
| 243685_at    | -               | -1,888254346 | -0,912331589 | -0,97592276 |  |
| 234551_at    | OTOP2           | -1,543331864 | -0,566887459 | -0,9764444  |  |
| 241471_at    | LOC730236       | -1,543331864 | -0,566887459 | -0,9764444  |  |
| 1564911_at   | SNHG4           | -2,089474779 | -1,112851844 | -0,97662294 |  |
| 209828_s_at  | IL16            | -2,089474779 | -1,112851844 | -0,97662294 |  |
| 224456_s_at  | MGC12982        | -2,089474779 | -1,112851844 | -0,97662294 |  |
| 236378_at    | CIB4            | -2,089474779 | -1,112851844 | -0,97662294 |  |
| 1556972_at   | -               | -1,591296941 | -0,614371577 | -0,97692536 |  |
| 1562673_at   | -               | -1,591296941 | -0,614371577 | -0,97692536 |  |
| 216853_x_at  | IGLC1 /// IGLJ3 | -1,591296941 | -0,614371577 | -0,97692536 |  |
| 223865_at    | SOX6            | -1,591296941 | -0,614371577 | -0,97692536 |  |
| 237344_at    | LOC100505474    | -1,591296941 | -0,614371577 | -0,97692536 |  |
| 232923_at    | -               | -0,112808516 | 0,864649967  | -0,97745848 |  |
| 214108_at    | MAX             | -0,285837228 | 0,691645685  | -0,97748291 |  |
| 240373_at    | CACTIN          | -1,173767127 | -0,19610998  | -0,97765715 |  |
| 244813_at    | -               | -1,173767127 | -0,19610998  | -0,97765715 |  |
| 215967_s_at  | LY9             | -2,311268652 | -1,332017329 | -0,97925132 |  |
| 216851_at    | IGLJ3           | -2,311268652 | -1,332017329 | -0,97925132 |  |
| 1553436_at   | MUC19           | -2,64318869  | -1,663414495 | -0,9797742  |  |
| 1561408_at   | -               | -2,64318869  | -1,663414495 | -0,9797742  |  |
| 206591_at    | RAG1            | -2,64318869  | -1,663414495 | -0,9797742  |  |
| 208061_at    | -               | -2,64318869  | -1,663414495 | -0,9797742  |  |
| 219144_at    | DUSP26          | -1,470833215 | -0,490927335 | -0,97990588 |  |
| 1564435_a_at | KRT72           | -1,026571149 | -0,046302147 | -0,980269   |  |
| 1556195_a_at | -               | -1,399512875 | -0,41858459  | -0,98092829 |  |
| 1570376_at   | LOC154822       | -1,399512875 | -0,41858459  | -0,98092829 |  |
| 213783_at    | MFNG            | -1,399512875 | -0,41858459  | -0,98092829 |  |
| 239382_at    | HPS1            | -1,399512875 | -0,41858459  | -0,98092829 |  |
| 1553478_at   | KIRREL3-AS3     | -1,518072576 | -0,536087151 | -0,98198542 |  |
| 1556675_s_at | LOC100507584    | -2,359436556 | -1,377419394 | -0,98201716 |  |
| 208441_at    | IGF1R           | -2,359436556 | -1,377419394 | -0,98201716 |  |
| 237077_at    | -               | -2,359436556 | -1,377419394 | -0,98201716 |  |
| 237954_x_at  | -               | -2,359436556 | -1,377419394 | -0,98201716 |  |
| 241322_at    | -               | -2,359436556 | -1,377419394 | -0,98201716 |  |
| 217686_at    | PTPN1           | -1,240169874 | -0,258114234 | -0,98205564 |  |
| 221319_at    | PCDHB8          | -2,597496523 | -1,615132408 | -0,98236412 |  |
| 241056_at    | ZC3H3           | -2,597496523 | -1,615132408 | -0,98236412 |  |

|              |                  |              |              |             |  |
|--------------|------------------|--------------|--------------|-------------|--|
| 206368_at    | CPLX2            | -1,838812296 | -0,855751026 | -0,98306127 |  |
| 209706_at    | NKX3-1           | -1,838812296 | -0,855751026 | -0,98306127 |  |
| 230868_at    | -                | -1,838812296 | -0,855751026 | -0,98306127 |  |
| 232925_at    | -                | -1,838812296 | -0,855751026 | -0,98306127 |  |
| 222194_at    | FAM66D           | -2,138804305 | -1,154897679 | -0,98390663 |  |
| 236734_at    | SLITRK1          | -2,138804305 | -1,154897679 | -0,98390663 |  |
| 1566166_at   | -                | -0,394749123 | 0,589657387  | -0,98440651 |  |
| 242714_at    | -                | -0,467091869 | 0,51742585   | -0,98451772 |  |
| 1568870_at   | SLC24A4          | -2,479842156 | -1,494668682 | -0,98517347 |  |
| 239758_at    | -                | -2,479842156 | -1,494668682 | -0,98517347 |  |
| 244448_at    | -                | -2,479842156 | -1,494668682 | -0,98517347 |  |
| 1566631_at   | -                | -0,926850548 | 0,059218869  | -0,98606942 |  |
| 1563658_a_at | SYT9             | -1,937711681 | -0,950686014 | -0,98702567 |  |
| 204793_at    | GPRASP1          | -1,937711681 | -0,950686014 | -0,98702567 |  |
| 1562226_at   | VWDE             | -3,07502285  | -2,086984744 | -0,98803811 |  |
| 226164_x_at  | RIMKLB           | -0,285837228 | 0,704715219  | -0,99055245 |  |
| 242352_at    | NIPBL            | -0,352951799 | 0,638150376  | -0,99110217 |  |
| 240745_at    | -                | -3,15396682  | -2,162639771 | -0,99132705 |  |
| 216101_at    | -                | -0,512251684 | 0,479907041  | -0,99215873 |  |
| 203812_at    | SLIT3            | -0,57445847  | 0,417770464  | -0,99222893 |  |
| 1554891_at   | -                | -2,779459409 | -1,787089803 | -0,99236961 |  |
| 236925_at    | -                | -2,779459409 | -1,787089803 | -0,99236961 |  |
| 243585_at    | ATP13A5          | -2,779459409 | -1,787089803 | -0,99236961 |  |
| 224773_at    | NAV1             | -1,639579028 | -0,646746079 | -0,99283295 |  |
| 228055_at    | NAPSB            | -1,812418401 | -0,819238336 | -0,99318006 |  |
| 231699_at    | LOC100289251     | -1,812418401 | -0,819238336 | -0,99318006 |  |
| 243635_at    | -                | -1,812418401 | -0,819238336 | -0,99318006 |  |
| 243712_at    | XIST             | -0,986356909 | 0,007421914  | -0,99377882 |  |
| 221630_s_at  | DDX4             | -2,908843709 | -1,912089812 | -0,9967539  |  |
| 1554822_at   | PHTF2            | -1,763254337 | -0,765504029 | -0,99775031 |  |
| 1566602_at   | RPUSD3           | -1,763254337 | -0,765504029 | -0,99775031 |  |
| 203997_at    | PTPN3            | -1,763254337 | -0,765504029 | -0,99775031 |  |
| 207683_at    | FOXN1            | -1,763254337 | -0,765504029 | -0,99775031 |  |
| 1559679_a_at | -                | -2,262747984 | -1,264005341 | -0,99874264 |  |
| 1569660_at   | PP13439          | -2,262747984 | -1,264005341 | -0,99874264 |  |
| 236401_at    | GIMAP1           | -2,262747984 | -1,264005341 | -0,99874264 |  |
| 239162_at    | DAPK1-IT1        | -0,543051993 | 0,456918297  | -0,99997029 |  |
| 1557875_at   | -                | -1,196375121 | -0,19610998  | -1,00026514 |  |
| 212951_at    | GPR116           | -1,196375121 | -0,19610998  | -1,00026514 |  |
| 231427_at    | LOC284648        | -1,196375121 | -0,19610998  | -1,00026514 |  |
| 226824_at    | CPXM2            | -0,706943342 | 0,293518836  | -1,00046218 |  |
| 239614_x_at  | -                | -3,287237186 | -2,286583451 | -1,00065374 |  |
| 215881_x_at  | SSX2 /// SSX2B / | -1,2845686   | -0,283667828 | -1,00090077 |  |
| 242551_at    | -                | -1,2845686   | -0,283667828 | -1,00090077 |  |
| 240072_at    | ASXL2            | -1,047650486 | -0,046302147 | -1,00134834 |  |
| 1569728_at   | LINC00423        | -2,01371626  | -1,010192375 | -1,00352389 |  |
| 236083_at    | BCL2L15          | -2,01371626  | -1,010192375 | -1,00352389 |  |
| 236434_at    | PES1             | -2,01371626  | -1,010192375 | -1,00352389 |  |
| 215941_at    | -                | -2,667025278 | -1,663414495 | -1,00361078 |  |
| 221062_at    | HS3ST3B1         | -2,667025278 | -1,663414495 | -1,00361078 |  |
| 234398_at    | -                | -2,866296344 | -1,862647763 | -1,00364858 |  |
| 1553813_s_at | TLE6             | -1,353583928 | -0,34958478  | -1,00399915 |  |
| 1564525_at   | GSN              | -1,353583928 | -0,34958478  | -1,00399915 |  |
| 238238_at    | -                | -1,353583928 | -0,34958478  | -1,00399915 |  |
| 239978_at    | -                | -1,353583928 | -0,34958478  | -1,00399915 |  |
| 206413_s_at  | TCL1B            | -0,366776884 | 0,638150376  | -1,00492726 |  |

|              |              |              |              |             |  |
|--------------|--------------|--------------|--------------|-------------|--|
| 205580_s_at  | HRH1         | -1,424023738 | -0,41858459  | -1,00543915 |  |
| 244476_at    | -            | -0,946847173 | 0,059218869  | -1,00606604 |  |
| 1556138_a_at | -            | -2,384869671 | -1,377419394 | -1,00745028 |  |
| 204406_at    | FLT1         | -2,384869671 | -1,377419394 | -1,00745028 |  |
| 1557702_at   | -            | -1,688127507 | -0,679763839 | -1,00836367 |  |
| 1562032_at   | -            | -1,688127507 | -0,679763839 | -1,00836367 |  |
| 216964_at    | USP22        | -1,688127507 | -0,679763839 | -1,00836367 |  |
| 222971_at    | NDUFA2       | -1,688127507 | -0,679763839 | -1,00836367 |  |
| 225931_s_at  | RNF213       | -1,688127507 | -0,679763839 | -1,00836367 |  |
| 214180_at    | MAN1C1       | -1,399512875 | -0,39061235  | -1,00890053 |  |
| 243064_at    | -            | -2,43257096  | -1,423348341 | -1,00922262 |  |
| 244824_at    | -            | -2,43257096  | -1,423348341 | -1,00922262 |  |
| 205712_at    | PTPRD        | -2,551294263 | -1,541908042 | -1,00938622 |  |
| 1560097_at   | FHAD1        | -1,089016378 | -0,079522948 | -1,00949343 |  |
| 228923_at    | S100A6       | -2,504600601 | -1,494668682 | -1,00993192 |  |
| 235018_at    | CSRNP3       | -2,504600601 | -1,494668682 | -1,00993192 |  |
| 242531_at    | RRAGC        | -2,504600601 | -1,494668682 | -1,00993192 |  |
| 216223_at    | CPN2         | -2,972500237 | -1,961547147 | -1,01095309 |  |
| 242279_at    | -            | -2,972500237 | -1,961547147 | -1,01095309 |  |
| 155554_at    | BPIFA4P      | -2,063149277 | -1,050406615 | -1,01274266 |  |
| 240067_at    | -            | -2,063149277 | -1,050406615 | -1,01274266 |  |
| 1562332_at   | -            | -1,964176657 | -0,950686014 | -1,01349064 |  |
| 236353_at    | -            | -1,964176657 | -0,950686014 | -1,01349064 |  |
| 235272_at    | SBSN         | -1,173767127 | -0,160136748 | -1,01363038 |  |
| 204707_s_at  | MAPK4        | -2,236765673 | -1,220210588 | -1,01655509 |  |
| 235289_at    | EIF5A2       | -2,236765673 | -1,220210588 | -1,01655509 |  |
| 1561719_at   | -            | -3,054236653 | -2,037551727 | -1,01668493 |  |
| 207252_at    | INE1         | -0,79540287  | 0,222599095  | -1,01800196 |  |
| 214809_at    | LOC100294145 | -2,756478458 | -1,738067356 | -1,0184111  |  |
| 1567009_at   | -            | -2,930741289 | -1,912089812 | -1,01865148 |  |
| 221359_at    | GDNF         | -2,930741289 | -1,912089812 | -1,01865148 |  |
| 1553064_at   | H1FOO        | -1,838812296 | -0,819238336 | -1,01957396 |  |
| 205380_at    | PDZK1        | -1,838812296 | -0,819238336 | -1,01957396 |  |
| 210019_at    | CALML3       | -1,838812296 | -0,819238336 | -1,01957396 |  |
| 234137_s_at  | -            | -1,838812296 | -0,819238336 | -1,01957396 |  |
| 207429_at    | SLC22A2      | -1,240169874 | -0,220592223 | -1,01957765 |  |
| 239332_at    | LOC100506373 | -1,240169874 | -0,220592223 | -1,01957765 |  |
| 209992_at    | PFKFB2       | -0,543051993 | 0,479907041  | -1,02295903 |  |
| 214479_at    | GFRA3        | -1,047650486 | -0,024572586 | -1,0230779  |  |
| 1557357_at   | LOC440944    | -1,591296941 | -0,566887459 | -1,02440948 |  |
| 219478_at    | WFDC1        | -1,591296941 | -0,566887459 | -1,02440948 |  |
| 217038_at    | -            | -1,308181863 | -0,283667828 | -1,02451404 |  |
| 215200_x_at  | -            | -0,352951799 | 0,67181667   | -1,02476847 |  |
| 222766_at    | POLR3K       | -1,639579028 | -0,614371577 | -1,02520745 |  |
| 240521_at    | -            | -1,639579028 | -0,614371577 | -1,02520745 |  |
| 1566779_at   | -            | -1,937711681 | -0,912331589 | -1,02538009 |  |
| 206384_at    | CACNG3       | -1,937711681 | -0,912331589 | -1,02538009 |  |
| 215786_at    | -            | -1,937711681 | -0,912331589 | -1,02538009 |  |
| 232178_at    | ZNF503       | -1,937711681 | -0,912331589 | -1,02538009 |  |
| 1552713_a_at | SLC4A1       | -2,138804305 | -1,112851844 | -1,02595246 |  |
| 1562751_at   | -            | -2,138804305 | -1,112851844 | -1,02595246 |  |
| 205888_s_at  | JAKMIP2      | -2,138804305 | -1,112851844 | -1,02595246 |  |
| 211966_at    | COL4A2       | -2,138804305 | -1,112851844 | -1,02595246 |  |
| 230398_at    | TNS4         | -0,946847173 | 0,079428135  | -1,02627531 |  |
| 220662_s_at  | HEYL         | -1,2845686   | -0,258114234 | -1,02645437 |  |
| 233780_at    | RIF1         | -1,2845686   | -0,258114234 | -1,02645437 |  |

|              |                |              |              |             |  |
|--------------|----------------|--------------|--------------|-------------|--|
| 1557555_at   | -              | -1,518072576 | -0,490927335 | -1,02714524 |  |
| 217293_at    | -              | -1,518072576 | -0,490927335 | -1,02714524 |  |
| 233688_at    | KCNIP3         | -2,359436556 | -1,332017329 | -1,02741923 |  |
| 234261_at    | -              | -2,359436556 | -1,332017329 | -1,02741923 |  |
| 244330_at    | -              | -2,359436556 | -1,332017329 | -1,02741923 |  |
| 216469_at    | LOC441666      | -3,114791413 | -2,086984744 | -1,02780667 |  |
| 1570597_at   | -              | -2,64318869  | -1,615132408 | -1,02805628 |  |
| 237990_x_at  | C19orf29       | -2,64318869  | -1,615132408 | -1,02805628 |  |
| 216688_at    | -              | -1,353583928 | -0,322870281 | -1,03071365 |  |
| 223762_at    | TMOD4 /// VPS7 | -1,353583928 | -0,322870281 | -1,03071365 |  |
| 205551_at    | SV2B           | -1,763254337 | -0,730778808 | -1,03247553 |  |
| 228268_at    | FMO2           | -1,888254346 | -0,855751026 | -1,03250332 |  |
| 228457_at    | PPM1L          | -1,888254346 | -0,855751026 | -1,03250332 |  |
| 242916_at    | CNTRL          | -1,888254346 | -0,855751026 | -1,03250332 |  |
| 1558177_at   | TMEM229B       | -2,187914861 | -1,154897679 | -1,03301718 |  |
| 207392_x_at  | UGT2B15        | -2,187914861 | -1,154897679 | -1,03301718 |  |
| 222922_at    | KCNE3          | -2,187914861 | -1,154897679 | -1,03301718 |  |
| 229372_at    | GOLT1A         | -2,187914861 | -1,154897679 | -1,03301718 |  |
| 236121_at    | OR51E2         | -2,187914861 | -1,154897679 | -1,03301718 |  |
| 1569806_at   | -              | -1,71423189  | -0,679763839 | -1,03446805 |  |
| 229626_at    | C12orf68       | -1,71423189  | -0,679763839 | -1,03446805 |  |
| 212362_at    | ATP2A2         | -0,926850548 | 0,109221392  | -1,03607194 |  |
| 214176_s_at  | PBXIP1         | -0,83191556  | 0,204310755  | -1,03622632 |  |
| 229738_at    | DNAH10         | -1,196375121 | -0,160136748 | -1,03623837 |  |
| 234133_s_at  | LOC728543      | -1,196375121 | -0,160136748 | -1,03623837 |  |
| 1568977_at   | RNASET2        | -2,089474779 | -1,050406615 | -1,03906816 |  |
| 235279_at    | PARVA          | -2,089474779 | -1,050406615 | -1,03906816 |  |
| 236123_at    | ST7L           | -2,089474779 | -1,050406615 | -1,03906816 |  |
| 207865_s_at  | BMP8B          | -1,688127507 | -0,646746079 | -1,04138143 |  |
| 231471_at    | -              | -1,688127507 | -0,646746079 | -1,04138143 |  |
| 238151_at    | -              | -1,688127507 | -0,646746079 | -1,04138143 |  |
| 1557027_at   | LOC100287221   | -2,779459409 | -1,738067356 | -1,04139205 |  |
| 1560118_at   | -              | -2,779459409 | -1,738067356 | -1,04139205 |  |
| 224038_at    | TIMM23         | -2,779459409 | -1,738067356 | -1,04139205 |  |
| 1554068_s_at | C12orf66       | -2,262747984 | -1,220210588 | -1,0425374  |  |
| 205009_at    | TFF1           | -2,262747984 | -1,220210588 | -1,0425374  |  |
| 217177_s_at  | PTPRB          | -2,262747984 | -1,220210588 | -1,0425374  |  |
| 219179_at    | DACT1          | -2,262747984 | -1,220210588 | -1,0425374  |  |
| 1562388_at   | LOC285819      | -0,888496123 | 0,157549243  | -1,04604537 |  |
| 233484_at    | -              | -0,888496123 | 0,157549243  | -1,04604537 |  |
| 1562643_at   | -              | -1,812418401 | -0,765504029 | -1,04691437 |  |
| 211882_x_at  | FUT6           | -1,812418401 | -0,765504029 | -1,04691437 |  |
| 216386_at    | LOC220077      | -1,812418401 | -0,765504029 | -1,04691437 |  |
| 237227_at    | NEK10          | -1,812418401 | -0,765504029 | -1,04691437 |  |
| 213976_at    | CIZ1           | -2,311268652 | -1,264005341 | -1,04726331 |  |
| 217617_at    | -              | -2,311268652 | -1,264005341 | -1,04726331 |  |
| 205734_s_at  | AFF3           | -2,712026959 | -1,663414495 | -1,04861246 |  |
| 206678_at    | GABRA1         | -2,712026959 | -1,663414495 | -1,04861246 |  |
| 234803_at    | CSTL1          | -2,712026959 | -1,663414495 | -1,04861246 |  |
| 1560971_a_at | -              | -1,399512875 | -0,34958478  | -1,04992809 |  |
| 1562976_at   | -              | -1,399512875 | -0,34958478  | -1,04992809 |  |
| 217633_at    | URB1           | -1,399512875 | -0,34958478  | -1,04992809 |  |
| 241603_at    | ATP11A         | -1,399512875 | -0,34958478  | -1,04992809 |  |
| 228989_at    | C18orf56       | -1,308181863 | -0,258114234 | -1,05006763 |  |
| 1563946_at   | -              | -0,234278768 | 0,817300337  | -1,0515791  |  |
| 208432_s_at  | CACNA1E        | -1,964176657 | -0,912331589 | -1,05184507 |  |

|              |               |              |              |             |  |
|--------------|---------------|--------------|--------------|-------------|--|
| 213586_at    | CDKN2D        | -1,964176657 | -0,912331589 | -1,05184507 |  |
| 233410_at    | CYP1B1-AS1    | -1,964176657 | -0,912331589 | -1,05184507 |  |
| 243698_at    | -             | -1,964176657 | -0,912331589 | -1,05184507 |  |
| 1559932_at   | -             | -2,667025278 | -1,615132408 | -1,05189287 |  |
| 1561140_at   | -             | -3,013665402 | -1,961547147 | -1,05211825 |  |
| 229430_at    | C8orf46       | -3,013665402 | -1,961547147 | -1,05211825 |  |
| 1570651_at   | CCBL1         | -1,470833215 | -0,41858459  | -1,05224863 |  |
| 205168_at    | DDR2          | -1,470833215 | -0,41858459  | -1,05224863 |  |
| 216955_at    | TAF1          | -1,543331864 | -0,490927335 | -1,05240453 |  |
| 221862_at    | MIER2         | -1,543331864 | -0,490927335 | -1,05240453 |  |
| 1567272_at   | OR2K2         | -2,384869671 | -1,332017329 | -1,05285234 |  |
| 233037_at    | -             | -2,384869671 | -1,332017329 | -1,05285234 |  |
| 240209_at    | C16orf78      | -2,384869671 | -1,332017329 | -1,05285234 |  |
| 1557659_a_at | -             | -2,063149277 | -1,010192375 | -1,0529569  |  |
| 221678_at    | ABHD6         | -2,063149277 | -1,010192375 | -1,0529569  |  |
| 234903_at    | OR2B3         | -2,063149277 | -1,010192375 | -1,0529569  |  |
| 203649_s_at  | PLA2G2A       | -0,759588698 | 0,293518836  | -1,05310753 |  |
| 1553033_at   | SYTL5         | -2,43257096  | -1,377419394 | -1,05515157 |  |
| 1564691_at   | LOC100128594  | -2,43257096  | -1,377419394 | -1,05515157 |  |
| 204910_s_at  | TRIM3         | -2,43257096  | -1,377419394 | -1,05515157 |  |
| 227830_at    | GABRB3        | -2,43257096  | -1,377419394 | -1,05515157 |  |
| 230143_at    | RNF165        | -2,43257096  | -1,377419394 | -1,05515157 |  |
| 216343_at    | -             | -1,591296941 | -0,536087151 | -1,05520979 |  |
| 236983_at    | TMC5          | -1,591296941 | -0,536087151 | -1,05520979 |  |
| 243912_x_at  | APOBEC3F      | -1,591296941 | -0,536087151 | -1,05520979 |  |
| 1556012_at   | KLHDC7A       | -0,926850548 | 0,128747141  | -1,05559769 |  |
| 1565389_s_at | GRM5          | -0,926850548 | 0,128747141  | -1,05559769 |  |
| 1559928_at   | PAPPA         | -2,479842156 | -1,423348341 | -1,05649381 |  |
| 211201_at    | FSHR          | -2,479842156 | -1,423348341 | -1,05649381 |  |
| 236068_s_at  | C3orf14       | -2,479842156 | -1,423348341 | -1,05649381 |  |
| 238380_s_at  | LINC00226     | -2,479842156 | -1,423348341 | -1,05649381 |  |
| 1569781_at   | LOC285423     | -2,551294263 | -1,494668682 | -1,05662558 |  |
| 238254_at    | ZNF677        | -2,551294263 | -1,494668682 | -1,05662558 |  |
| 240604_at    | ERI2          | -2,551294263 | -1,494668682 | -1,05662558 |  |
| 222413_s_at  | MLL3          | 1,314003737  | 2,372786857  | -1,05878312 |  |
| 241076_at    | -             | -1,196375121 | -0,136643983 | -1,05973114 |  |
| 213451_x_at  | TNXA /// TNXB | -0,325749314 | 0,73688026   | -1,06262957 |  |
| 1555662_s_at | DAOA          | -2,01371626  | -0,950686014 | -1,06303025 |  |
| 229202_at    | -             | -2,01371626  | -0,950686014 | -1,06303025 |  |
| 237505_at    | -             | -2,01371626  | -0,950686014 | -1,06303025 |  |
| 241452_at    | -             | -2,01371626  | -0,950686014 | -1,06303025 |  |
| 1553555_at   | TAS2R38       | -1,2845686   | -0,220592223 | -1,06397638 |  |
| 234113_at    | -             | -1,089016378 | -0,024572586 | -1,06444379 |  |
| 206100_at    | CPM           | -1,71423189  | -0,646746079 | -1,06748581 |  |
| 206780_at    | GAD2          | -1,71423189  | -0,646746079 | -1,06748581 |  |
| 234498_at    | C2orf65       | -1,71423189  | -0,646746079 | -1,06748581 |  |
| 220441_at    | DNAJC22       | -1,888254346 | -0,819238336 | -1,06901601 |  |
| 223968_at    | ZNF44         | -1,888254346 | -0,819238336 | -1,06901601 |  |
| 243919_at    | -             | -1,888254346 | -0,819238336 | -1,06901601 |  |
| 213661_at    | PAMR1         | -1,173767127 | -0,102100538 | -1,07166659 |  |
| 237641_at    | -             | -1,173767127 | -0,102100538 | -1,07166659 |  |
| 1555787_at   | C11orf63      | -1,639579028 | -0,566887459 | -1,07269157 |  |
| 224188_s_at  | XPNPEP3       | -0,655928373 | 0,417770464  | -1,07369884 |  |
| 1570151_at   | -             | -1,688127507 | -0,614371577 | -1,07375593 |  |
| 208431_s_at  | TUB           | -1,688127507 | -0,614371577 | -1,07375593 |  |
| 243455_at    | -             | -1,688127507 | -0,614371577 | -1,07375593 |  |

|              |                 |              |              |             |  |
|--------------|-----------------|--------------|--------------|-------------|--|
| 220806_x_at  | GNG13           | -2,187914861 | -1,112851844 | -1,07506302 |  |
| 240901_at    | -               | -2,187914861 | -1,112851844 | -1,07506302 |  |
| 229149_at    | -               | -2,089474779 | -1,010192375 | -1,0792824  |  |
| 230969_at    | ATPAF1-AS1      | -2,089474779 | -1,010192375 | -1,0792824  |  |
| 243897_at    | -               | -2,089474779 | -1,010192375 | -1,0792824  |  |
| 208608_s_at  | SNTB1           | -2,504600601 | -1,423348341 | -1,08125226 |  |
| 225288_at    | COL27A1         | -2,504600601 | -1,423348341 | -1,08125226 |  |
| 230940_at    | LOC100288123    | -2,504600601 | -1,423348341 | -1,08125226 |  |
| 1552819_at   | LINC00205       | -1,812418401 | -0,730778808 | -1,08163959 |  |
| 233968_at    | CST11           | -1,812418401 | -0,730778808 | -1,08163959 |  |
| 241178_at    | -               | -1,812418401 | -0,730778808 | -1,08163959 |  |
| 237794_at    | ANKRD30BL /// A | -2,236765673 | -1,154897679 | -1,08186799 |  |
| 229400_at    | HOXD10          | -1,937711681 | -0,855751026 | -1,08196066 |  |
| 237560_at    | MRPS5           | -1,937711681 | -0,855751026 | -1,08196066 |  |
| 204501_at    | NOV             | -1,763254337 | -0,679763839 | -1,0834905  |  |
| 215574_at    | -               | -1,763254337 | -0,679763839 | -1,0834905  |  |
| 232775_at    | -               | -1,763254337 | -0,679763839 | -1,0834905  |  |
| 1570448_at   | -               | -2,823166348 | -1,738067356 | -1,08509899 |  |
| 1569270_at   | LOC100134368    | -1,308181863 | -0,220592223 | -1,08758964 |  |
| 240372_at    | -               | -1,308181863 | -0,220592223 | -1,08758964 |  |
| 210102_at    | VWA5A           | -2,138804305 | -1,050406615 | -1,08839769 |  |
| 212565_at    | STK38L          | -2,138804305 | -1,050406615 | -1,08839769 |  |
| 239638_at    | -               | -1,2845686   | -0,19610998  | -1,08845862 |  |
| 228428_at    | FAM102A         | -2,311268652 | -1,220210588 | -1,09105806 |  |
| 232258_at    | -               | -3,054236653 | -1,961547147 | -1,09268951 |  |
| 218406_x_at  | NENF            | -1,173767127 | -0,079522948 | -1,09424418 |  |
| 224560_at    | TIMP2           | -2,359436556 | -1,264005341 | -1,09543122 |  |
| 206548_at    | -               | -1,353583928 | -0,258114234 | -1,09546969 |  |
| 237509_at    | -               | -2,712026959 | -1,615132408 | -1,09689455 |  |
| 244279_at    | SOBP            | -2,712026959 | -1,615132408 | -1,09689455 |  |
| 243482_at    | -               | -1,518072576 | -0,41858459  | -1,09948799 |  |
| 1560531_at   | LCE1B           | -1,71423189  | -0,614371577 | -1,09986031 |  |
| 232767_at    | CADM1           | -1,71423189  | -0,614371577 | -1,09986031 |  |
| 1557891_s_at | STXBP5-AS1      | -1,591296941 | -0,490927335 | -1,10036961 |  |
| 235329_at    | NOXO1           | -1,591296941 | -0,490927335 | -1,10036961 |  |
| 240968_at    | -               | -2,43257096  | -1,332017329 | -1,10055363 |  |
| 221331_x_at  | CTLA4           | -1,424023738 | -0,322870281 | -1,10115346 |  |
| 1563900_at   | FAM83B          | -2,64318869  | -1,541908042 | -1,10128065 |  |
| 220858_at    | SORBS2          | -2,64318869  | -1,541908042 | -1,10128065 |  |
| 233389_at    | C20orf26        | -2,64318869  | -1,541908042 | -1,10128065 |  |
| 1554610_at   | ANKMY1          | -2,01371626  | -0,912331589 | -1,10138467 |  |
| 1561100_at   | -               | -2,479842156 | -1,377419394 | -1,10242276 |  |
| 206471_s_at  | PLXNC1          | -2,479842156 | -1,377419394 | -1,10242276 |  |
| 237179_at    | PCMTD2          | -2,479842156 | -1,377419394 | -1,10242276 |  |
| 235808_at    | LOC100506051    | -1,639579028 | -0,536087151 | -1,10349188 |  |
| 243282_at    | CCDC93          | -0,67289328  | 0,433557298  | -1,10645058 |  |
| 1570225_at   | TMEM150B        | -1,131062212 | -0,024572586 | -1,10648963 |  |
| 208007_at    | -               | -1,964176657 | -0,855751026 | -1,10842563 |  |
| 209071_s_at  | RGS5            | -1,964176657 | -0,855751026 | -1,10842563 |  |
| 243494_at    | LOC100506926    | -2,972500237 | -1,862647763 | -1,10985247 |  |
| 234887_at    | -               | -1,308181863 | -0,19610998  | -1,11207188 |  |
| 226039_at    | MGAT4A          | -2,063149277 | -0,950686014 | -1,11246326 |  |
| 216313_at    | PCDHB17         | -3,07502285  | -1,961547147 | -1,1134757  |  |
| 219597_s_at  | DUOX1           | -1,399512875 | -0,283667828 | -1,11584505 |  |
| 225238_at    | MSI2            | -1,399512875 | -0,283667828 | -1,11584505 |  |
| 241203_at    | -               | -1,763254337 | -0,646746079 | -1,11650826 |  |

|              |                |              |              |             |  |
|--------------|----------------|--------------|--------------|-------------|--|
| 1560654_at   | FLJ37201       | -2,384869671 | -1,264005341 | -1,12086433 |  |
| 234370_at    | VSIG1          | -2,384869671 | -1,264005341 | -1,12086433 |  |
| 239836_at    | -              | -2,384869671 | -1,264005341 | -1,12086433 |  |
| 1552598_at   | KCNG4          | -1,688127507 | -0,566887459 | -1,12124005 |  |
| 1563809_a_at | MCF2L          | -1,688127507 | -0,566887459 | -1,12124005 |  |
| 209854_s_at  | KLK2           | -1,688127507 | -0,566887459 | -1,12124005 |  |
| 217380_s_at  | LOC100505933   | -2,908843709 | -1,787089803 | -1,12175391 |  |
| 206251_s_at  | AVPR1A         | -1,888254346 | -0,765504029 | -1,12275032 |  |
| 234959_at    | -              | -1,888254346 | -0,765504029 | -1,12275032 |  |
| 206309_at    | LECT1          | -2,236765673 | -1,112851844 | -1,12391383 |  |
| 219839_x_at  | TCL6           | -2,236765673 | -1,112851844 | -1,12391383 |  |
| 235019_at    | CPM            | -2,236765673 | -1,112851844 | -1,12391383 |  |
| 241628_at    | -              | -2,236765673 | -1,112851844 | -1,12391383 |  |
| 241794_at    | ACTR6          | -1,543331864 | -0,41858459  | -1,12474727 |  |
| 238696_at    | -              | -2,667025278 | -1,541908042 | -1,12511724 |  |
| 1554795_a_at | FBLIM1         | -2,504600601 | -1,377419394 | -1,12718121 |  |
| 1557025_a_at | -              | -2,504600601 | -1,377419394 | -1,12718121 |  |
| 240288_at    | KCNRG /// TRIM | -2,504600601 | -1,377419394 | -1,12718121 |  |
| 1567375_at   | -              | -1,173767127 | -0,046302147 | -1,12746498 |  |
| 236253_at    | -              | -1,173767127 | -0,046302147 | -1,12746498 |  |
| 219087_at    | ASPN           | -2,551294263 | -1,423348341 | -1,12794592 |  |
| 237074_at    | LOC100506030   | -2,551294263 | -1,423348341 | -1,12794592 |  |
| 244167_at    | -              | -2,551294263 | -1,423348341 | -1,12794592 |  |
| 1558697_a_at | KIAA0430       | -2,138804305 | -1,010192375 | -1,12861193 |  |
| 217339_x_at  | CTAG1A /// CTA | -2,138804305 | -1,010192375 | -1,12861193 |  |
| 241302_at    | -              | -2,138804305 | -1,010192375 | -1,12861193 |  |
| 220455_at    | SLC16A8        | -1,591296941 | -0,461594427 | -1,12970251 |  |
| 215015_at    | CCDC64         | -0,172274514 | 0,960386719  | -1,13266123 |  |
| 208473_s_at  | GP2            | -1,353583928 | -0,220592223 | -1,1329917  |  |
| 230283_at    | NEURL2         | -0,741668563 | 0,393761504  | -1,13543007 |  |
| 241430_at    | C2orf51        | -1,026571149 | 0,109221392  | -1,13579254 |  |
| 1558345_a_at | LOC439911      | -1,240169874 | -0,102100538 | -1,13806934 |  |
| 207309_at    | NOS1           | -1,131062212 | 0,007421914  | -1,13848413 |  |
| 236484_at    | -              | -2,089474779 | -0,950686014 | -1,13878876 |  |
| 1556160_a_at | -              | -2,359436556 | -1,220210588 | -1,13922597 |  |
| 208422_at    | MSR1           | -2,359436556 | -1,220210588 | -1,13922597 |  |
| 213566_at    | RNASE6         | -2,359436556 | -1,220210588 | -1,13922597 |  |
| 234150_at    | -              | -2,359436556 | -1,220210588 | -1,13922597 |  |
| 240283_at    | -              | -2,359436556 | -1,220210588 | -1,13922597 |  |
| 234353_at    | CATSPERG       | -1,424023738 | -0,283667828 | -1,14035591 |  |
| 234439_at    | -              | -1,424023738 | -0,283667828 | -1,14035591 |  |
| 1561015_at   | -              | -1,399512875 | -0,258114234 | -1,14139864 |  |
| 243742_at    | LOC100505797   | -2,930741289 | -1,787089803 | -1,14365149 |  |
| 222797_at    | DPYSL5         | -1,964176657 | -0,819238336 | -1,14493832 |  |
| 232428_at    | MOGAT2         | -1,964176657 | -0,819238336 | -1,14493832 |  |
| 1558732_at   | MAP4K4         | -1,71423189  | -0,566887459 | -1,14734443 |  |
| 204179_at    | MB             | -1,71423189  | -0,566887459 | -1,14734443 |  |
| 209173_at    | AGR2           | -1,71423189  | -0,566887459 | -1,14734443 |  |
| 244322_at    | LOC646329      | -1,71423189  | -0,566887459 | -1,14734443 |  |
| 220815_at    | CTNNA3         | -2,479842156 | -1,332017329 | -1,14782483 |  |
| 238246_at    | MTL5           | -2,479842156 | -1,332017329 | -1,14782483 |  |
| 243057_at    | -              | -2,479842156 | -1,332017329 | -1,14782483 |  |
| 214819_at    | IQSEC2         | -1,089016378 | 0,059218869  | -1,14823525 |  |
| 215401_at    | -              | -1,089016378 | 0,059218869  | -1,14823525 |  |
| 1563742_at   | LOC643650      | -2,64318869  | -1,494668682 | -1,14852001 |  |
| 205916_at    | S100A7         | -2,64318869  | -1,494668682 | -1,14852001 |  |

|              |                  |              |              |             |  |
|--------------|------------------|--------------|--------------|-------------|--|
| 214375_at    | PPFIBP1          | -2,64318869  | -1,494668682 | -1,14852001 |  |
| 232376_at    | PCCA             | -2,64318869  | -1,494668682 | -1,14852001 |  |
| 1563772_a_at | LAMA3            | -1,639579028 | -0,490927335 | -1,14865169 |  |
| 238817_at    | RIMBP2           | -1,639579028 | -0,490927335 | -1,14865169 |  |
| 240333_at    | -                | -1,639579028 | -0,490927335 | -1,14865169 |  |
| 209728_at    | HLA-DRB4 /// LO  | -1,173767127 | -0,024572586 | -1,14919454 |  |
| 208144_s_at  | -                | -2,262747984 | -1,112851844 | -1,14989614 |  |
| 227497_at    | SOX6             | -2,262747984 | -1,112851844 | -1,14989614 |  |
| 232967_at    | -                | -2,262747984 | -1,112851844 | -1,14989614 |  |
| 240769_at    | -                | -2,262747984 | -1,112851844 | -1,14989614 |  |
| 234191_at    | BCL2L14          | -1,196375121 | -0,046302147 | -1,15007297 |  |
| 225966_at    | C17orf89         | -2,063149277 | -0,912331589 | -1,15081769 |  |
| 227320_at    | FAM101A /// ZNF  | -1,688127507 | -0,536087151 | -1,15204036 |  |
| 222375_at    | -                | -1,543331864 | -0,39061235  | -1,15271951 |  |
| 227475_at    | FOXQ1            | -2,311268652 | -1,154897679 | -1,15637097 |  |
| 1555271_a_at | TERT             | -1,047650486 | 0,109221392  | -1,15687188 |  |
| 232396_at    | -                | -1,353583928 | -0,19610998  | -1,15747395 |  |
| 1566111_at   | PIEZO1           | -1,888254346 | -0,730778808 | -1,15747554 |  |
| 1567101_at   | -                | -1,888254346 | -0,730778808 | -1,15747554 |  |
| 202238_s_at  | NNMT             | -1,888254346 | -0,730778808 | -1,15747554 |  |
| 236775_s_at  | -                | -1,888254346 | -0,730778808 | -1,15747554 |  |
| 201107_s_at  | THBS1            | -2,01371626  | -0,855751026 | -1,15796523 |  |
| 231352_at    | SLC22A8          | -1,240169874 | -0,079522948 | -1,16064693 |  |
| 215435_at    | -                | -0,706943342 | 0,456918297  | -1,16386164 |  |
| 239853_at    | KLC3             | -0,57445847  | 0,589657387  | -1,16411586 |  |
| 1561733_at   | -                | -2,384869671 | -1,220210588 | -1,16465908 |  |
| 228686_at    | FLJ33630         | -2,384869671 | -1,220210588 | -1,16465908 |  |
| 230583_s_at  | LOC100287728 /   | -2,384869671 | -1,220210588 | -1,16465908 |  |
| 1561555_at   | -                | -1,812418401 | -0,646746079 | -1,16567232 |  |
| 1563088_a_at | LOC284837        | -1,812418401 | -0,646746079 | -1,16567232 |  |
| 237820_at    | -                | -1,812418401 | -0,646746079 | -1,16567232 |  |
| 240621_at    | -                | -1,812418401 | -0,646746079 | -1,16567232 |  |
| 1562753_at   | ST6GALNAC5       | -1,089016378 | 0,079428135  | -1,16844451 |  |
| 221585_at    | CACNG4           | -2,43257096  | -1,264005341 | -1,16856562 |  |
| 236293_at    | RHOH             | -2,43257096  | -1,264005341 | -1,16856562 |  |
| 235186_at    | LOC388692        | -0,946847173 | 0,222599095  | -1,16944627 |  |
| 1569453_a_at | LOC692247        | -1,196375121 | -0,024572586 | -1,17180254 |  |
| 1559672_a_at | CCDC171          | -2,504600601 | -1,332017329 | -1,17258327 |  |
| 236376_at    | RIMKLA           | -2,504600601 | -1,332017329 | -1,17258327 |  |
| 243993_at    | -                | -0,655928373 | 0,51742585   | -1,17335422 |  |
| 211843_x_at  | CYP3A7-CYP3A4    | -2,551294263 | -1,377419394 | -1,17387487 |  |
| 232858_at    | -                | -2,551294263 | -1,377419394 | -1,17387487 |  |
| 237995_at    | RIMBP2           | -2,597496523 | -1,423348341 | -1,17414818 |  |
| 240014_at    | POLR2J4          | -0,741668563 | 0,433557298  | -1,17522586 |  |
| 206107_at    | RGS11            | -2,089474779 | -0,912331589 | -1,17714319 |  |
| 216585_at    | -                | -2,089474779 | -0,912331589 | -1,17714319 |  |
| 239787_at    | KCTD4            | -2,089474779 | -0,912331589 | -1,17714319 |  |
| 1562259_at   | TEX9             | -2,187914861 | -1,010192375 | -1,17772249 |  |
| 242879_x_at  | AKT3             | -1,639579028 | -0,461594427 | -1,1779846  |  |
| 1554528_at   | C3orf15 /// LOC1 | -1,71423189  | -0,536087151 | -1,17814474 |  |
| 232223_at    | -                | -1,71423189  | -0,536087151 | -1,17814474 |  |
| 243326_at    | -                | -1,71423189  | -0,536087151 | -1,17814474 |  |
| 206262_at    | ADH1C            | -2,972500237 | -1,787089803 | -1,18541043 |  |
| 1569477_at   | -                | -2,236765673 | -1,050406615 | -1,18635906 |  |
| 219721_at    | -                | -2,236765673 | -1,050406615 | -1,18635906 |  |
| 235592_at    | -                | -2,236765673 | -1,050406615 | -1,18635906 |  |



|              |                 |              |              |             |  |
|--------------|-----------------|--------------|--------------|-------------|--|
| 1555060_a_at | IKZF2           | -1,470833215 | -0,283667828 | -1,18716539 |  |
| 239989_at    | CNTLN           | -2,138804305 | -0,950686014 | -1,18811829 |  |
| 1563142_at   | -               | -1,131062212 | 0,059218869  | -1,19028108 |  |
| 1556125_at   | -               | -3,054236653 | -1,862647763 | -1,19158889 |  |
| 231399_at    | RAB3IP          | -1,838812296 | -0,646746079 | -1,19206622 |  |
| 243662_at    | -               | -1,838812296 | -0,646746079 | -1,19206622 |  |
| 239062_at    | LOC100131096    | -1,353583928 | -0,160136748 | -1,19344718 |  |
| 211886_s_at  | TBX5            | -1,543331864 | -0,34958478  | -1,19374708 |  |
| 1554650_a_at | -               | -1,240169874 | -0,046302147 | -1,19386773 |  |
| 1556672_a_at | RBM6            | -0,59053611  | 0,603679647  | -1,19421576 |  |
| 1559631_at   | -               | -2,01371626  | -0,819238336 | -1,19447792 |  |
| 243416_at    | -               | -1,518072576 | -0,322870281 | -1,19520229 |  |
| 1566932_x_at | TFB2M           | -1,688127507 | -0,490927335 | -1,19720017 |  |
| 216390_at    | LCAT            | -1,812418401 | -0,614371577 | -1,19804682 |  |
| 1553032_at   | IL31RA          | -2,311268652 | -1,112851844 | -1,19841681 |  |
| 1569601_at   | -               | -0,741668563 | 0,456918297  | -1,19858686 |  |
| 231858_x_at  | AP5B1           | -1,964176657 | -0,765504029 | -1,19867263 |  |
| 239633_at    | -               | -0,888496123 | 0,310717132  | -1,19921325 |  |
| 240753_at    | -               | -2,866296344 | -1,663414495 | -1,20288185 |  |
| 214580_x_at  | KRT6A /// KRT6E | -1,2845686   | -0,079522948 | -1,20504565 |  |
| 1562269_at   | -               | -1,937711681 | -0,730778808 | -1,20693287 |  |
| 231362_at    | -               | -1,937711681 | -0,730778808 | -1,20693287 |  |
| 236395_at    | -               | -1,937711681 | -0,730778808 | -1,20693287 |  |
| 1554419_x_at | GGNBP2          | -2,823166348 | -1,615132408 | -1,20803394 |  |
| 211425_x_at  | SSX4 /// SSX4B  | -2,823166348 | -1,615132408 | -1,20803394 |  |
| 244690_at    | -               | -2,823166348 | -1,615132408 | -1,20803394 |  |
| 233233_at    | RASSF3          | -1,888254346 | -0,679763839 | -1,20849051 |  |
| 226903_s_at  | SLC6A10P /// SL | -1,131062212 | 0,079428135  | -1,21049035 |  |
| 231409_at    | -               | -2,262747984 | -1,050406615 | -1,21234137 |  |
| 232345_at    | C18orf8         | -1,470833215 | -0,258114234 | -1,21271898 |  |
| 228372_at    | C10orf128       | -2,756478458 | -1,541908042 | -1,21457042 |  |
| 234784_at    | -               | -2,756478458 | -1,541908042 | -1,21457042 |  |
| 232351_at    | -               | -0,543051993 | 0,67181667   | -1,21486866 |  |
| 212325_at    | LIMCH1          | -2,479842156 | -1,264005341 | -1,21583682 |  |
| 207462_at    | GLRA2           | -1,353583928 | -0,136643983 | -1,21693995 |  |
| 1562351_at   | -               | -2,597496523 | -1,377419394 | -1,22007713 |  |
| 240095_at    | -               | -2,597496523 | -1,377419394 | -1,22007713 |  |
| 1558574_at   | LOC100508631    | -1,639579028 | -0,41858459  | -1,22099444 |  |
| 229729_at    | TMEM8B          | -1,639579028 | -0,41858459  | -1,22099444 |  |
| 233306_at    | -               | -1,71423189  | -0,490927335 | -1,22330455 |  |
| 222892_s_at  | TMEM40          | -1,838812296 | -0,614371577 | -1,22444072 |  |
| 236252_at    | -               | -2,138804305 | -0,912331589 | -1,22647272 |  |
| 236306_at    | KIAA2026        | -2,138804305 | -0,912331589 | -1,22647272 |  |
| 240976_at    | -               | -2,138804305 | -0,912331589 | -1,22647272 |  |
| 236689_at    | RNF151          | -1,688127507 | -0,461594427 | -1,22653308 |  |
| 1562920_at   | LOC441086       | -1,763254337 | -0,536087151 | -1,22716719 |  |
| 237194_at    | -               | 0,072842263  | 1,303116084  | -1,23027382 |  |
| 235540_at    | GNRH1           | -1,964176657 | -0,730778808 | -1,23339785 |  |
| 231033_at    | -               | -2,089474779 | -0,855751026 | -1,23372375 |  |
| 217713_x_at  | -               | -0,089689931 | 1,144305291  | -1,23399522 |  |
| 1563344_at   | -               | -1,518072576 | -0,283667828 | -1,23440475 |  |
| 217014_s_at  | AZGP1 /// AZGP  | -1,518072576 | -0,283667828 | -1,23440475 |  |
| 1555100_at   | APLF            | -1,591296941 | -0,34958478  | -1,24171216 |  |
| 244460_at    | TMEM225         | -1,591296941 | -0,34958478  | -1,24171216 |  |
| 236970_s_at  | BCAP29          | -2,667025278 | -1,423348341 | -1,24367694 |  |
| 1553804_a_at | TEX34           | -2,063149277 | -0,819238336 | -1,24391094 |  |

|              |              |              |              |             |  |
|--------------|--------------|--------------|--------------|-------------|--|
| 1554503_a_at | OSCAR        | -2,063149277 | -0,819238336 | -1,24391094 |  |
| 205755_at    | ITIH3        | -2,063149277 | -0,819238336 | -1,24391094 |  |
| 1556393_at   | -            | -1,812418401 | -0,566887459 | -1,24553094 |  |
| 211645_x_at  | -            | -2,359436556 | -1,112851844 | -1,24658471 |  |
| 242355_at    | -            | -2,359436556 | -1,112851844 | -1,24658471 |  |
| 205629_s_at  | CRH          | -1,470833215 | -0,220592223 | -1,25024099 |  |
| 236651_at    | KALRN        | -2,866296344 | -1,615132408 | -1,25116394 |  |
| 240522_at    | -            | -2,866296344 | -1,615132408 | -1,25116394 |  |
| 208138_at    | GAST         | -1,047650486 | 0,204310755  | -1,25196124 |  |
| 1566278_at   | -            | -1,937711681 | -0,679763839 | -1,25794784 |  |
| 1553865_a_at | GPR26        | -2,311268652 | -1,050406615 | -1,26086204 |  |
| 208542_x_at  | ZNF208       | -2,311268652 | -1,050406615 | -1,26086204 |  |
| 224086_at    | -            | -2,311268652 | -1,050406615 | -1,26086204 |  |
| 236725_at    | WWC1         | -1,399512875 | -0,136643983 | -1,26286889 |  |
| 221457_s_at  | BTNL2        | -1,089016378 | 0,176436073  | -1,26545245 |  |
| 238460_at    | FAM83A       | -2,64318869  | -1,377419394 | -1,2657693  |  |
| 242165_at    | LRIG2        | -2,64318869  | -1,377419394 | -1,2657693  |  |
| 233658_at    | -            | -0,85085127  | 0,417770464  | -1,26862173 |  |
| 222319_at    | -            | -2,089474779 | -0,819238336 | -1,27023644 |  |
| 203404_at    | ARMCX2       | -2,384869671 | -1,112851844 | -1,27201783 |  |
| 226961_at    | PRR15        | -1,888254346 | -0,614371577 | -1,27388277 |  |
| 244389_at    | TLK1         | -1,470833215 | -0,19610998  | -1,27472324 |  |
| 241980_at    | MAP6         | -2,187914861 | -0,912331589 | -1,27558327 |  |
| 205799_s_at  | SLC3A1       | -1,812418401 | -0,536087151 | -1,27633125 |  |
| 1555209_at   | LOC439951    | -2,43257096  | -1,154897679 | -1,27767328 |  |
| 224195_at    | TTY12        | -2,43257096  | -1,154897679 | -1,27767328 |  |
| 1569689_s_at | GABRB3       | -2,823166348 | -1,541908042 | -1,28125831 |  |
| 209072_at    | MBP          | -2,01371626  | -0,730778808 | -1,28293745 |  |
| 218610_s_at  | CPPED1       | -2,01371626  | -0,730778808 | -1,28293745 |  |
| 241518_at    | -            | -2,01371626  | -0,730778808 | -1,28293745 |  |
| 207212_at    | SLC9A3       | -1,173767127 | 0,109221392  | -1,28298852 |  |
| 241931_at    | XG /// XGPY2 | -2,504600601 | -1,220210588 | -1,28439001 |  |
| 237269_at    | -            | -2,779459409 | -1,494668682 | -1,28479073 |  |
| 1559785_at   | TPPP2        | -2,236765673 | -0,950686014 | -1,28607966 |  |
| 239588_s_at  | -            | -2,236765673 | -0,950686014 | -1,28607966 |  |
| 205299_s_at  | BTN2A2       | -2,551294263 | -1,264005341 | -1,28728892 |  |
| 236693_at    | LOC100130155 | -2,551294263 | -1,264005341 | -1,28728892 |  |
| 206248_at    | PRKCE        | -1,424023738 | -0,136643983 | -1,28737976 |  |
| 243369_at    | -            | -2,712026959 | -1,423348341 | -1,28867862 |  |
| 1559502_s_at | LRRC25       | -1,639579028 | -0,34958478  | -1,28999425 |  |
| 1554946_at   | LOC100506465 | -2,908843709 | -1,615132408 | -1,2937113  |  |
| 243047_at    | FAM193B      | -1,71423189  | -0,41858459  | -1,2956473  |  |
| 207908_at    | KRT2         | -1,399512875 | -0,102100538 | -1,29741234 |  |
| 1558448_a_at | -            | -2,063149277 | -0,765504029 | -1,29764525 |  |
| 230549_at    | ELK4         | -2,063149277 | -0,765504029 | -1,29764525 |  |
| 1557908_at   | -            | -1,763254337 | -0,461594427 | -1,30165991 |  |
| 215843_s_at  | TLL2         | -1,763254337 | -0,461594427 | -1,30165991 |  |
| 223561_at    | NEK6         | -1,763254337 | -0,461594427 | -1,30165991 |  |
| 222577_at    | CCDC90B      | -1,353583928 | -0,046302147 | -1,30728178 |  |
| 234427_at    | YME1L1       | -2,64318869  | -1,332017329 | -1,31117136 |  |
| 1554491_a_at | SERPINC1     | -2,262747984 | -0,950686014 | -1,31206197 |  |
| 1566994_at   | -            | -1,639579028 | -0,322870281 | -1,31670875 |  |
| 1563391_at   | -            | -2,138804305 | -0,819238336 | -1,31956597 |  |
| 216085_at    | DKFZP434C153 | -2,138804305 | -0,819238336 | -1,31956597 |  |
| 205671_s_at  | HLA-DOB      | -1,399512875 | -0,079522948 | -1,31998993 |  |
| 222920_s_at  | TESPA1       | -1,888254346 | -0,566887459 | -1,32136689 |  |

|              |                  |              |              |             |  |
|--------------|------------------|--------------|--------------|-------------|--|
| 234714_x_at  | ATP2B2           | -1,812418401 | -0,490927335 | -1,32149107 |  |
| 237397_at    | -                | -1,543331864 | -0,220592223 | -1,32273964 |  |
| 206464_at    | BMX              | -1,937711681 | -0,614371577 | -1,3233401  |  |
| 224105_x_at  | -                | -1,937711681 | -0,614371577 | -1,3233401  |  |
| 1561490_at   | NPSR1-AS1        | -1,71423189  | -0,39061235  | -1,32361954 |  |
| 214596_at    | CHRM3            | -1,71423189  | -0,39061235  | -1,32361954 |  |
| 207874_s_at  | CFHR4            | -2,866296344 | -1,541908042 | -1,3243883  |  |
| 237707_at    | -                | -2,866296344 | -1,541908042 | -1,3243883  |  |
| 223933_at    | KIF5A            | -2,236765673 | -0,912331589 | -1,32443408 |  |
| 244565_at    | HMX2             | -2,236765673 | -0,912331589 | -1,32443408 |  |
| 1561468_at   | -                | -2,479842156 | -1,154897679 | -1,32494448 |  |
| 1555373_at   | -                | -3,114791413 | -1,787089803 | -1,32770161 |  |
| 242573_at    | -                | -2,823166348 | -1,494668682 | -1,32849767 |  |
| 234093_at    | ZNF326           | -2,551294263 | -1,220210588 | -1,33108368 |  |
| 238019_at    | PLIN5            | -2,551294263 | -1,220210588 | -1,33108368 |  |
| 240399_at    | -                | -2,551294263 | -1,220210588 | -1,33108368 |  |
| 1560874_at   | EFCAB4B          | -2,187914861 | -0,855751026 | -1,33216383 |  |
| 208223_s_at  | ACVR1B           | -2,187914861 | -0,855751026 | -1,33216383 |  |
| 237722_at    | FLI1             | -2,187914861 | -0,855751026 | -1,33216383 |  |
| 1563120_at   | LOC100129029     | -2,063149277 | -0,730778808 | -1,33237047 |  |
| 1565733_at   | -                | -2,063149277 | -0,730778808 | -1,33237047 |  |
| 220373_at    | DCHS2            | -2,063149277 | -0,730778808 | -1,33237047 |  |
| 210855_at    | GREB1            | -1,591296941 | -0,258114234 | -1,33318271 |  |
| 236031_x_at  | FREM1            | -2,597496523 | -1,264005341 | -1,33349118 |  |
| 220528_at    | VNN3             | -2,01371626  | -0,679763839 | -1,33395242 |  |
| 1552967_at   | ZNF645           | -2,384869671 | -1,050406615 | -1,33446306 |  |
| 241752_at    | SLC8A1           | -1,838812296 | -0,490927335 | -1,34788496 |  |
| 229655_at    | FAM19A5          | -2,504600601 | -1,154897679 | -1,34970292 |  |
| 232440_at    | ZDHHC13          | -1,964176657 | -0,614371577 | -1,34980508 |  |
| 1563080_at   | -                | -3,013665402 | -1,663414495 | -1,35025091 |  |
| 1562730_a_at | -                | -1,888254346 | -0,536087151 | -1,35216719 |  |
| 237037_at    | -                | -2,089474779 | -0,730778808 | -1,35869597 |  |
| 239966_at    | -                | -2,089474779 | -0,730778808 | -1,35869597 |  |
| 202895_s_at  | SIRPA            | -1,71423189  | -0,34958478  | -1,36464711 |  |
| 1560405_at   | -                | -1,688127507 | -0,322870281 | -1,36525723 |  |
| 1566978_at   | -                | -2,479842156 | -1,112851844 | -1,36699031 |  |
| 217096_at    | PCLO             | -2,187914861 | -0,819238336 | -1,36867652 |  |
| 208195_at    | TTN              | -1,763254337 | -0,39061235  | -1,37264199 |  |
| 1552667_a_at | SH2D3C           | -1,196375121 | 0,176436073  | -1,37281119 |  |
| 203431_s_at  | ARHGAP32         | -2,138804305 | -0,765504029 | -1,37330028 |  |
| 1569181_x_at | -                | -2,384869671 | -1,010192375 | -1,3746773  |  |
| 1556105_at   | -                | -2,756478458 | -1,377419394 | -1,37905906 |  |
| 234333_at    | KIAA2022         | -2,756478458 | -1,377419394 | -1,37905906 |  |
| 1553504_at   | MRGPRX4          | -2,64318869  | -1,264005341 | -1,37918335 |  |
| 240923_at    | -                | -2,236765673 | -0,855751026 | -1,38101465 |  |
| 205425_at    | HIP1             | -2,504600601 | -1,112851844 | -1,39174876 |  |
| 231886_at    | LOC100134822     | -1,2845686   | 0,109221392  | -1,39378999 |  |
| 234456_at    | MIR3656 /// TRAI | -1,591296941 | -0,19610998  | -1,39518696 |  |
| 228601_at    | HOXD-AS1         | -1,964176657 | -0,566887459 | -1,3972892  |  |
| 212940_at    | COL6A1           | -1,131062212 | 0,26733076   | -1,39839297 |  |
| 242482_at    | PRKAR1A          | -2,311268652 | -0,912331589 | -1,39893706 |  |
| 1561872_at   | -                | -2,823166348 | -1,423348341 | -1,39981801 |  |
| 1552493_s_at | CYP11B1          | -2,138804305 | -0,730778808 | -1,4080255  |  |
| 1555187_at   | -                | -2,359436556 | -0,950686014 | -1,40875054 |  |
| 237038_at    | CXCL14           | -2,236765673 | -0,819238336 | -1,41752734 |  |
| 1561407_at   | ARAP2            | -2,43257096  | -1,010192375 | -1,42237858 |  |

|              |              |              |              |             |  |
|--------------|--------------|--------------|--------------|-------------|--|
| 1569141_a_at | PPARGC1A     | -2,551294263 | -1,112851844 | -1,43844242 |  |
| 1557713_at   | -            | -1,518072576 | -0,079522948 | -1,43854963 |  |
| 1557866_at   | C9orf117     | -0,85085127  | 0,589657387  | -1,44050866 |  |
| 221115_s_at  | LENEP        | -1,2845686   | 0,157549243  | -1,44211784 |  |
| 216580_at    | -            | -2,866296344 | -1,423348341 | -1,442948   |  |
| 211287_x_at  | CSF2RA       | -1,639579028 | -0,19610998  | -1,44346905 |  |
| 233914_s_at  | SBF2         | -2,262747984 | -0,819238336 | -1,44350965 |  |
| 1556754_at   | LOC100132987 | -1,937711681 | -0,490927335 | -1,44678435 |  |
| 233277_at    | -            | -2,504600601 | -1,050406615 | -1,45419399 |  |
| 206646_at    | GLI1         | -0,926850548 | 0,532164371  | -1,45901492 |  |
| 222934_s_at  | CLEC4E       | -2,138804305 | -0,679763839 | -1,45904047 |  |
| 241049_at    | GRM7         | -1,812418401 | -0,34958478  | -1,46283362 |  |
| 1557031_at   | RNF212       | -1,888254346 | -0,41858459  | -1,46966976 |  |
| 215371_at    | MED27        | -1,518072576 | -0,046302147 | -1,47177043 |  |
| 232180_at    | UGP2         | -2,01371626  | -0,536087151 | -1,47762911 |  |
| 1566473_a_at | -            | -0,741668563 | 0,73688026   | -1,47854882 |  |
| 1557484_at   | -            | -1,639579028 | -0,160136748 | -1,47944228 |  |
| 230012_at    | LINC00324    | -1,763254337 | -0,283667828 | -1,47958651 |  |
| 232021_at    | GXYLT1       | -1,763254337 | -0,283667828 | -1,47958651 |  |
| 1569887_a_at | LOC286135    | -1,812418401 | -0,322870281 | -1,48954812 |  |
| 241688_at    | -            | -2,823166348 | -1,332017329 | -1,49114902 |  |
| 231209_at    | EXOC3L4      | -2,311268652 | -0,819238336 | -1,49203032 |  |
| 215212_at    | -            | -2,262747984 | -0,765504029 | -1,49724396 |  |
| 241994_at    | XDH          | -2,262747984 | -0,765504029 | -1,49724396 |  |
| 244538_at    | KCTD19       | -1,470833215 | 0,028364014  | -1,49919723 |  |
| 243374_x_at  | -            | -2,236765673 | -0,730778808 | -1,50598686 |  |
| 1562187_at   | -            | -2,667025278 | -1,154897679 | -1,5121276  |  |
| 1566984_at   | -            | -2,43257096  | -0,912331589 | -1,52023937 |  |
| 1560315_at   | GLCC1        | -2,138804305 | -0,614371577 | -1,52443273 |  |
| 242288_s_at  | EMILIN2      | -2,063149277 | -0,536087151 | -1,52706213 |  |
| 206484_s_at  | XPNPEP2      | -2,262747984 | -0,730778808 | -1,53196918 |  |
| 1552445_a_at | ESX1         | -2,359436556 | -0,819238336 | -1,54019822 |  |
| 231658_x_at  | LOC100289079 | -2,551294263 | -1,010192375 | -1,54110189 |  |
| 234219_at    | -            | -2,551294263 | -1,010192375 | -1,54110189 |  |
| 1555834_at   | UCHL1        | -2,187914861 | -0,646746079 | -1,54116878 |  |
| 234836_at    | -            | -2,187914861 | -0,646746079 | -1,54116878 |  |
| 1569300_at   | MFAP3L       | -1,591296941 | -0,046302147 | -1,54499479 |  |
| 204777_s_at  | MAL          | -1,591296941 | -0,046302147 | -1,54499479 |  |
| 231363_at    | LELP1        | -2,597496523 | -1,050406615 | -1,54708991 |  |
| 240491_at    | -            | -1,399512875 | 0,157549243  | -1,55706212 |  |
| 1560883_s_at | -            | -1,353583928 | 0,204310755  | -1,55789468 |  |
| 223959_at    | DNAL1        | -2,384869671 | -0,819238336 | -1,56563134 |  |
| 1562529_s_at | -            | -2,479842156 | -0,912331589 | -1,56751057 |  |
| 224344_at    | COX6A1       | -1,543331864 | 0,028364014  | -1,57169588 |  |
| 236524_at    | -            | -2,597496523 | -1,010192375 | -1,58730415 |  |
| 236766_at    | -            | -2,01371626  | -0,41858459  | -1,59513167 |  |
| 221801_x_at  | NEFL         | -2,551294263 | -0,950686014 | -1,60060825 |  |
| 1569739_at   | LOC221946    | -1,964176657 | -0,34958478  | -1,61459188 |  |
| 1561167_at   | -            | -1,639579028 | -0,024572586 | -1,61500644 |  |
| 1564568_at   | -            | -1,838812296 | -0,220592223 | -1,61822007 |  |
| 213519_s_at  | LAMA2        | -2,236765673 | -0,614371577 | -1,6223941  |  |
| 224140_at    | NPCDR1       | -2,063149277 | -0,41858459  | -1,64456469 |  |
| 224040_at    | TTY5         | -1,639579028 | 0,007421914  | -1,64700094 |  |
| 240131_at    | -            | -2,43257096  | -0,765504029 | -1,66706693 |  |
| 1563828_at   | -            | -1,71423189  | -0,024572586 | -1,6896593  |  |
| 238278_at    | -            | -2,43257096  | -0,679763839 | -1,75280712 |  |

|              |           |              |              |             |  |
|--------------|-----------|--------------|--------------|-------------|--|
| 1566734_at   | LOC283454 | -2,667025278 | -0,912331589 | -1,75469369 |  |
| 1563970_at   | MRPS27    | -2,823166348 | -1,050406615 | -1,77275973 |  |
| 1554963_at   | -         | -2,504600601 | -0,730778808 | -1,77382179 |  |
| 1558831_x_at | -         | -2,138804305 | -0,34958478  | -1,78921952 |  |
| 1555664_at   | -         | -2,479842156 | -0,679763839 | -1,80007832 |  |
| 219338_s_at  | LRRC49    | -2,063149277 | -0,258114234 | -1,80503504 |  |
| 215840_at    | DNAH2     | -1,888254346 | -0,079522948 | -1,8087314  |  |
| 1565772_at   | PAK1      | -2,138804305 | -0,322870281 | -1,81593402 |  |
| 217704_x_at  | SUZ12P    | -1,812418401 | 0,007421914  | -1,81984031 |  |
| 1560025_at   | -         | -2,063149277 | -0,220592223 | -1,84255705 |  |
| 231058_at    | FXVD4     | -2,43257096  | -0,566887459 | -1,8656835  |  |
| 223934_at    | SP140L    | -2,823166348 | -0,950686014 | -1,87248033 |  |
| 1562894_at   | -         | -2,43257096  | -0,490927335 | -1,94164362 |  |
| 1554604_at   | MBTPS2    | -2,504600601 | -0,536087151 | -1,96851345 |  |
| 231334_at    | -         | -2,089474779 | -0,102100538 | -1,98737424 |  |
| 229529_at    | TCF21     | -2,089474779 | 0,109221392  | -2,19869617 |  |

**Table S4: Gene set annotation analysis****A: GSAA-results for activated genes by NKX2-4**

| Term                                                   | Count | P-Value  | Benjamini |
|--------------------------------------------------------|-------|----------|-----------|
| gonadal mesoderm development                           | 5     | 8,00E-05 | 9,40E-02  |
| phagocytosis, engulfment                               | 8     | 1,40E-04 | 9,40E-02  |
| glomerular filtration                                  | 5     | 1,40E-04 | 9,40E-02  |
| positive regulation of transcription, DNA-templated    | 35    | 1,50E-04 | 9,40E-02  |
| positive regulation of B cell activation               | 7     | 1,80E-04 | 9,40E-02  |
| phagocytosis, recognition                              | 7     | 2,80E-04 | 1,20E-01  |
| B cell receptor signaling pathway                      | 9     | 4,20E-04 | 1,50E-01  |
| response to pain                                       | 5     | 2,10E-03 | 6,50E-01  |
| negative regulation of gene expression                 | 13    | 2,30E-03 | 6,50E-01  |
| diaphragm development                                  | 4     | 2,70E-03 | 7,00E-01  |
| regulation of cell death                               | 4     | 5,10E-03 | 1,00E+00  |
| positive regulation of sequence-specific DNA binding t | 10    | 8,90E-03 | 1,00E+00  |
| regulation of podosome assembly                        | 3     | 1,10E-02 | 1,00E+00  |
| epithelial tube branching involved in lung morphogen   | 4     | 1,30E-02 | 1,00E+00  |
| peptide hormone processing                             | 4     | 1,50E-02 | 1,00E+00  |
| ventricular septum morphogenesis                       | 5     | 1,50E-02 | 1,00E+00  |
| positive regulation of gene expression                 | 17    | 1,60E-02 | 1,00E+00  |
| heart looping                                          | 7     | 1,60E-02 | 1,00E+00  |
| modulation of synaptic transmission                    | 4     | 1,80E-02 | 1,00E+00  |
| cellular response to prostaglandin E stimulus          | 4     | 1,80E-02 | 1,00E+00  |
| complement activation, classical pathway               | 9     | 1,80E-02 | 1,00E+00  |
| central nervous system development                     | 10    | 2,00E-02 | 1,00E+00  |
| proline transmembrane transport                        | 3     | 2,10E-02 | 1,00E+00  |
| transdifferentiation                                   | 3     | 2,10E-02 | 1,00E+00  |
| ATP metabolic process                                  | 5     | 2,20E-02 | 1,00E+00  |
| lens development in camera-type eye                    | 5     | 2,40E-02 | 1,00E+00  |
| kidney development                                     | 8     | 2,60E-02 | 1,00E+00  |
| adenylate cyclase-activating G-protein coupled recept  | 6     | 2,60E-02 | 1,00E+00  |
| protein dephosphorylation                              | 10    | 2,70E-02 | 1,00E+00  |
| positive regulation of GTPase activity                 | 29    | 2,70E-02 | 1,00E+00  |
| proline transport                                      | 3     | 2,80E-02 | 1,00E+00  |
| skeletal muscle tissue development                     | 6     | 2,80E-02 | 1,00E+00  |
| regulation of transcription, DNA-templated             | 65    | 3,00E-02 | 1,00E+00  |
| positive regulation of neurogenesis                    | 4     | 3,20E-02 | 1,00E+00  |
| regulation of ATPase activity                          | 3     | 3,50E-02 | 1,00E+00  |
| negative regulation of epithelial to mesenchymal tran  | 4     | 3,60E-02 | 1,00E+00  |
| cellular senescence                                    | 4     | 4,10E-02 | 1,00E+00  |
| negative regulation of protein autophosphorylation     | 3     | 4,30E-02 | 1,00E+00  |
| retina homeostasis                                     | 5     | 4,50E-02 | 1,00E+00  |
| positive regulation of cyclin-dependent protein serine | 4     | 4,50E-02 | 1,00E+00  |
| negative regulation of cell proliferation              | 21    | 4,70E-02 | 1,00E+00  |
| nucleosome assembly                                    | 9     | 4,80E-02 | 1,00E+00  |
| activation of protein kinase B activity                | 4     | 5,60E-02 | 1,00E+00  |
| innate immune response                                 | 22    | 5,70E-02 | 1,00E+00  |
| positive regulation of stem cell proliferation         | 3     | 6,00E-02 | 1,00E+00  |
| negative regulation of androgen receptor signaling pa  | 3     | 6,00E-02 | 1,00E+00  |

|                                                          |    |          |          |
|----------------------------------------------------------|----|----------|----------|
| vasculature development                                  | 3  | 6,00E-02 | 1,00E+00 |
| DNA duplex unwinding                                     | 5  | 6,00E-02 | 1,00E+00 |
| antibacterial humoral response                           | 5  | 6,00E-02 | 1,00E+00 |
| cell adhesion                                            | 23 | 6,10E-02 | 1,00E+00 |
| negative regulation of transforming growth factor bet    | 6  | 6,40E-02 | 1,00E+00 |
| posterior midgut development                             | 2  | 6,60E-02 | 1,00E+00 |
| positive regulation of mRNA endonucleolytic cleavage     | 2  | 6,60E-02 | 1,00E+00 |
| positive regulation of endoribonuclease activity         | 2  | 6,60E-02 | 1,00E+00 |
| cell chemotaxis                                          | 6  | 6,70E-02 | 1,00E+00 |
| eyelid development in camera-type eye                    | 3  | 6,90E-02 | 1,00E+00 |
| lung morphogenesis                                       | 3  | 6,90E-02 | 1,00E+00 |
| cardiac epithelial to mesenchymal transition             | 3  | 6,90E-02 | 1,00E+00 |
| positive regulation of protein targeting to mitochondr   | 7  | 7,00E-02 | 1,00E+00 |
| phospholipase C-activating G-protein coupled receptc     | 6  | 7,10E-02 | 1,00E+00 |
| establishment or maintenance of cell polarity            | 4  | 7,30E-02 | 1,00E+00 |
| embryonic skeletal system development                    | 4  | 7,90E-02 | 1,00E+00 |
| positive regulation of extrinsic apoptotic signaling pat | 3  | 7,90E-02 | 1,00E+00 |
| cellular response to transforming growth factor beta :   | 5  | 8,20E-02 | 1,00E+00 |
| signal transduction                                      | 49 | 8,20E-02 | 1,00E+00 |
| embryonic cranial skeleton morphogenesis                 | 4  | 8,50E-02 | 1,00E+00 |
| protein stabilization                                    | 9  | 8,90E-02 | 1,00E+00 |
| negative regulation of epithelial cell migration         | 3  | 8,90E-02 | 1,00E+00 |
| positive regulation of cellular protein metabolic proce  | 3  | 8,90E-02 | 1,00E+00 |
| dolichol-linked oligosaccharide biosynthetic process     | 3  | 8,90E-02 | 1,00E+00 |
| calcium-mediated signaling                               | 5  | 9,20E-02 | 1,00E+00 |
| actin filament organization                              | 6  | 9,50E-02 | 1,00E+00 |
| protein processing                                       | 6  | 9,50E-02 | 1,00E+00 |
| negative regulation of transcription from RNA polyme     | 32 | 9,60E-02 | 1,00E+00 |
| branchiomic skeletal muscle development                  | 2  | 9,80E-02 | 1,00E+00 |
| positive regulation of nucleotide-binding oligomerizat   | 2  | 9,80E-02 | 1,00E+00 |
| proepicardium development                                | 2  | 9,80E-02 | 1,00E+00 |
| positive regulation of epithelial cell migration         | 4  | 9,80E-02 | 1,00E+00 |
| regulation of protein ubiquitination                     | 3  | 9,90E-02 | 1,00E+00 |
| neurotrophin TRK receptor signaling pathway              | 3  | 9,90E-02 | 1,00E+00 |
| negative regulation of ossification                      | 3  | 9,90E-02 | 1,00E+00 |
| neuron cell-cell adhesion                                | 3  | 9,90E-02 | 1,00E+00 |

## B: GSAA-results for suppressed genes by NKX2-4

| Term                                        | Count | P-Value  | Benjamini |
|---------------------------------------------|-------|----------|-----------|
| sensory perception of sound                 | 13    | 3,70E-04 | 5,70E-01  |
| calcium ion transmembrane transport         | 12    | 5,30E-04 | 5,70E-01  |
| forelimb morphogenesis                      | 4     | 2,30E-03 | 1,00E+00  |
| ion transmembrane transport                 | 15    | 2,50E-03 | 1,00E+00  |
| positive regulation of fibroblast migration | 4     | 3,10E-03 | 1,00E+00  |
| maintenance of gastrointestinal epithelium  | 4     | 4,00E-03 | 1,00E+00  |
| regulation of cardiac conduction            | 7     | 4,70E-03 | 1,00E+00  |
| digestive tract morphogenesis               | 4     | 5,10E-03 | 1,00E+00  |
| negative regulation of cell growth          | 10    | 7,10E-03 | 1,00E+00  |

|                                                         |    |          |          |
|---------------------------------------------------------|----|----------|----------|
| protein dephosphorylation                               | 10 | 9,20E-03 | 1,00E+00 |
| negative regulation of nucleic acid-templated transcri  | 6  | 1,00E-02 | 1,00E+00 |
| cell differentiation                                    | 23 | 1,20E-02 | 1,00E+00 |
| embryonic forelimb morphogenesis                        | 5  | 1,20E-02 | 1,00E+00 |
| innervation                                             | 4  | 1,30E-02 | 1,00E+00 |
| transmission of nerve impulse                           | 4  | 1,80E-02 | 1,00E+00 |
| cellular response to hypoxia                            | 8  | 1,90E-02 | 1,00E+00 |
| positive regulation of activin receptor signaling pathw | 3  | 2,00E-02 | 1,00E+00 |
| cellular response to histamine                          | 3  | 2,00E-02 | 1,00E+00 |
| cell adhesion                                           | 22 | 2,00E-02 | 1,00E+00 |
| peptidyl-tyrosine dephosphorylation                     | 8  | 2,20E-02 | 1,00E+00 |
| glomerulus development                                  | 3  | 2,50E-02 | 1,00E+00 |
| glucocorticoid biosynthetic process                     | 3  | 2,50E-02 | 1,00E+00 |
| regulation of synaptic transmission, glutamatergic      | 4  | 2,60E-02 | 1,00E+00 |
| myeloid cell differentiation                            | 4  | 2,90E-02 | 1,00E+00 |
| locomotion                                              | 3  | 3,10E-02 | 1,00E+00 |
| muscle contraction                                      | 8  | 3,10E-02 | 1,00E+00 |
| regulation of cell adhesion                             | 5  | 3,20E-02 | 1,00E+00 |
| negative regulation of mitotic cell cycle               | 4  | 3,60E-02 | 1,00E+00 |
| cardiac conduction                                      | 5  | 3,70E-02 | 1,00E+00 |
| metanephros development                                 | 4  | 3,90E-02 | 1,00E+00 |
| endodermal cell differentiation                         | 4  | 3,90E-02 | 1,00E+00 |
| negative regulation of gene expression                  | 9  | 4,00E-02 | 1,00E+00 |
| pituitary gland development                             | 4  | 4,30E-02 | 1,00E+00 |
| negative regulation of androgen receptor signaling pa   | 3  | 4,30E-02 | 1,00E+00 |
| neurotransmitter biosynthetic process                   | 3  | 4,30E-02 | 1,00E+00 |
| negative regulation of cysteine-type endopeptidase ac   | 6  | 4,50E-02 | 1,00E+00 |
| sarcomere organization                                  | 4  | 4,70E-02 | 1,00E+00 |
| regulation of embryonic development                     | 3  | 5,00E-02 | 1,00E+00 |
| carboxylic acid metabolic process                       | 3  | 5,00E-02 | 1,00E+00 |
| positive regulation of GTPase activity                  | 24 | 5,00E-02 | 1,00E+00 |
| stem cell population maintenance                        | 5  | 5,10E-02 | 1,00E+00 |
| hematopoietic stem cell migration to bone marrow        | 2  | 5,50E-02 | 1,00E+00 |
| extracellular matrix disassembly                        | 6  | 6,30E-02 | 1,00E+00 |
| peptidyl-serine phosphorylation                         | 8  | 6,30E-02 | 1,00E+00 |
| response to ischemia                                    | 4  | 6,50E-02 | 1,00E+00 |
| endoplasmic reticulum calcium ion homeostasis           | 3  | 6,50E-02 | 1,00E+00 |
| intermediate filament cytoskeleton organization         | 3  | 6,50E-02 | 1,00E+00 |
| mitochondrion organization                              | 6  | 6,60E-02 | 1,00E+00 |
| negative regulation of signal transduction              | 4  | 7,00E-02 | 1,00E+00 |
| platelet degranulation                                  | 7  | 7,00E-02 | 1,00E+00 |
| intermediate filament organization                      | 3  | 7,30E-02 | 1,00E+00 |
| protein localization to organelle                       | 3  | 7,30E-02 | 1,00E+00 |
| regulation of sodium ion transmembrane transporter      | 3  | 7,30E-02 | 1,00E+00 |
| ossification                                            | 6  | 7,50E-02 | 1,00E+00 |
| positive regulation of MAPK cascade                     | 6  | 7,80E-02 | 1,00E+00 |
| axon guidance                                           | 9  | 8,00E-02 | 1,00E+00 |
| Golgi to plasma membrane transport                      | 3  | 8,10E-02 | 1,00E+00 |
| sarcomerogenesis                                        | 2  | 8,20E-02 | 1,00E+00 |
| cellular response to water deprivation                  | 2  | 8,20E-02 | 1,00E+00 |



|                                                      |   |          |          |
|------------------------------------------------------|---|----------|----------|
| negative regulation of biomineral tissue development | 2 | 8,20E-02 | 1,00E+00 |
| O-glycan processing                                  | 5 | 8,80E-02 | 1,00E+00 |
| positive regulation of histone acetylation           | 3 | 9,00E-02 | 1,00E+00 |
| regulation of bone mineralization                    | 3 | 9,00E-02 | 1,00E+00 |
| response to corticosterone                           | 3 | 9,00E-02 | 1,00E+00 |
| hair follicle development                            | 4 | 9,00E-02 | 1,00E+00 |
| cell communication                                   | 4 | 9,00E-02 | 1,00E+00 |
| epidermis development                                | 6 | 9,10E-02 | 1,00E+00 |
| positive regulation of protein binding               | 5 | 9,20E-02 | 1,00E+00 |
| cellular sodium ion homeostasis                      | 3 | 9,80E-02 | 1,00E+00 |

**Table S5: Comparative expression profiling data from AML patients (GSE6891)**

| ID          | Gene              | log2(fold change)(AML-M6 vs AML-M0-5) | -log10(Pvalue)(AML-M6 vs AML-M0-5) |
|-------------|-------------------|---------------------------------------|------------------------------------|
| 206145_at   | RHAG              | 5,027                                 | 11,143                             |
| 211560_s_at | ALAS2             | 4,99                                  | 5,956                              |
| 214407_x_at | GYPB              | 4,532                                 | 7,942                              |
| 214433_s_at | SELENBP1          | 4,425                                 | 7,879                              |
| 210746_s_at | EPB42             | 4,338                                 | 7,245                              |
| 211821_x_at | GYPA              | 4,312                                 | 8,573                              |
| 205390_s_at | ANK1              | 4,261                                 | 14,71                              |
| 205592_at   | SLC4A1            | 4,223                                 | 5,472                              |
| 211820_x_at | GYPA              | 4,199                                 | 9,305                              |
| 240336_at   | HBM               | 4,153                                 | 4,959                              |
| 204409_s_at | EIF1AY            | 4,112                                 | 5,815                              |
| 219672_at   | AHSP              | 4,105                                 | 8,582                              |
| 206937_at   | SPTA1             | 4,094                                 | 11,637                             |
| 207459_x_at | GYPB              | 4,083                                 | 8,694                              |
| 205950_s_at | CA1               | 4,08                                  | 6,208                              |
| 206698_at   | XK                | 4,004                                 | 7,615                              |
| 210395_x_at | MYL4              | 3,987                                 | 13,024                             |
| 206834_at   | HBD               | 3,938                                 | 4,974                              |
| 216833_x_at | GYPB              | 3,938                                 | 11,201                             |
| 210504_at   | KLF1              | 3,806                                 | 11,128                             |
| 208353_x_at | ANK1              | 3,796                                 | 12,662                             |
| 223432_at   | OSBP2             | 3,786                                 | 10,703                             |
| 216317_x_at | RHD///RHCE        | 3,785                                 | 10,91                              |
| 206077_at   | KEL               | 3,767                                 | 17,928                             |
| 216054_x_at | MYL4              | 3,761                                 | 15,863                             |
| 210088_x_at | MYL4              | 3,736                                 | 12,022                             |
| 208352_x_at | ANK1              | 3,73                                  | 14,27                              |
| 230720_at   | RNF182            | 3,713                                 | 22,972                             |
| 237403_at   | GFI1B             | 3,688                                 | 8,296                              |
| 205837_s_at | GYPA              | 3,677                                 | 9,634                              |
| 206283_s_at | TAL1              | 3,668                                 | 8,496                              |
| 211254_x_at | RHAG              | 3,655                                 | 17,064                             |
| 205391_x_at | ANK1              | 3,633                                 | 16,078                             |
| 223670_s_at | HEMGN             | 3,632                                 | 6,51                               |
| 210036_s_at | KCNH2             | 3,622                                 | 9,59                               |
| 221577_x_at | GDF15             | 3,609                                 | 20,621                             |
| 214146_s_at | PPBP              | 3,562                                 | 4,098                              |
| 204410_at   | EIF1AY            | 3,509                                 | 10,798                             |
| 39729_at    | PRDX2             | 3,506                                 | 6,356                              |
| 206146_s_at | RHAG              | 3,496                                 | 20,099                             |
| 205268_s_at | ADD2              | 3,485                                 | 10,71                              |
| 205262_at   | KCNH2             | 3,481                                 | 18,282                             |
| 221627_at   | TRIM10            | 3,477                                 | 10,69                              |
| 215819_s_at | RHD///RHCE        | 3,453                                 | 11,48                              |
| 206390_x_at | PF4               | 3,431                                 | 5,407                              |
| 234980_at   | TMEM56            | 3,425                                 | 17,993                             |
| 204505_s_at | DMTN              | 3,422                                 | 6,505                              |
| 220751_s_at | FAXDC2            | 3,414                                 | 11,992                             |
| 235916_at   | YPEL4             | 3,408                                 | 16,217                             |
| 229622_at   | ERFE              | 3,397                                 | 12,537                             |
| 209699_x_at | LOC101930400///A+ | 3,375                                 | 31,689                             |
| 209962_at   | EPOR              | 3,37                                  | 19,057                             |
| 204848_x_at | HBG2///HBG1       | 3,341                                 | 2,489                              |
| 201909_at   | RPS4Y1            | 3,33                                  | 2,2                                |
| 223669_at   | HEMGN             | 3,316                                 | 6,055                              |
| 210586_x_at | RHD               | 3,315                                 | 15,073                             |
| 205838_at   | GYPA              | 3,311                                 | 10,371                             |
| 218864_at   | TNS1              | 3,304                                 | 10,834                             |
| 207087_x_at | ANK1              | 3,302                                 | 13,793                             |
| 204419_x_at | HBG2///HBG1       | 3,301                                 | 2,521                              |
| 210430_x_at | RHD               | 3,269                                 | 19,619                             |

Tabelle1

|              |                    |       |        |
|--------------|--------------------|-------|--------|
| 202219_at    | SLC6A8             | 3,266 | 8,593  |
| 211743_s_at  | PRG2               | 3,218 | 5,748  |
| 1552713_a_at | SLC4A1             | 3,2   | 10,601 |
| 209301_at    | CA2                | 3,195 | 4,207  |
| 206700_s_at  | KDM5D              | 3,194 | 3,634  |
| 1562903_at   | FAM86B3P           | 3,169 | 4,493  |
| 222528_s_at  | SLC25A37           | 3,142 | 7,633  |
| 204720_s_at  | DNAJC6             | 3,13  | 12,396 |
| 202201_at    | BLVRB              | 3,107 | 7,672  |
| 211653_x_at  | LOC101930400///Atr | 3,098 | 18,57  |
| 208501_at    | GF11B              | 3,077 | 8,53   |
| 211658_at    | PRDX2              | 3,072 | 13,654 |
| 201334_s_at  | ARHGEF12           | 3,056 | 7,117  |
| 227654_at    | FAM65C             | 3,041 | 10,409 |
| 1555590_a_at | GATA1              | 3,034 | 14,58  |
| 231078_at    | SLC25A37           | 3,031 | 6,798  |
| 230690_at    | TUBB1              | 3,01  | 6,328  |
| 202949_s_at  | FHL2               | 2,988 | 10,745 |
| 205389_s_at  | ANK1               | 2,987 | 8,225  |
| 221748_s_at  | TNS1               | 2,984 | 5,769  |
| 209047_at    | AQP1               | 2,959 | 9,81   |
| 209585_s_at  | MINPP1             | 2,945 | 11,199 |
| 37986_at     | EPOR               | 2,943 | 13,824 |
| 242335_at    | SLC25A37           | 2,942 | 9,952  |
| 225275_at    | EDIL3              | 2,941 | 18,526 |
| 203116_s_at  | FECH               | 2,934 | 8,858  |
| 221920_s_at  | SLC25A37           | 2,927 | 8,353  |
| 226179_at    | SLC25A37           | 2,911 | 7,919  |
| 215047_at    | TRIM58             | 2,91  | 4,859  |
| 230972_at    | ANKRD9             | 2,907 | 8,325  |
| 226421_at    | AMMECR1            | 2,89  | 14,864 |
| 208416_s_at  | SPTB               | 2,889 | 8,063  |
| 210215_at    | TFR2               | 2,883 | 8,939  |
| 204141_at    | TUBB2A             | 2,879 | 4,9    |
| 203040_s_at  | HMBS               | 2,877 | 12,307 |
| 203115_at    | FECH               | 2,876 | 6,795  |
| 204151_x_at  | AKR1C1             | 2,861 | 14,474 |
| 225387_at    | TSPAN5             | 2,848 | 7,75   |
| 221237_s_at  | OSBP2              | 2,843 | 11,852 |
| 213415_at    | CLIC2              | 2,817 | 7,943  |
| 225800_at    | JAZF1              | 2,814 | 5,868  |
| 48031_r_at   | FAXDC2             | 2,81  | 8,74   |
| 204976_s_at  | AMMECR1            | 2,799 | 18,193 |
| 225798_at    | JAZF1              | 2,797 | 6,191  |
| 211207_s_at  | ACSL6              | 2,79  | 10,092 |
| 210854_x_at  | SLC6A8             | 2,788 | 7,336  |
| 1555503_a_at | TMCC2              | 2,765 | 6,563  |
| 239142_at    | RFESD              | 2,753 | 14,463 |
| 212372_at    | MYH10              | 2,747 | 12,831 |
| 203662_s_at  | TMOD1              | 2,746 | 8,902  |
| 210446_at    | GATA1              | 2,728 | 11,977 |
| 210976_s_at  | PFKM               | 2,726 | 13,971 |
| 204416_x_at  | APOC1              | 2,711 | 27,68  |
| 209890_at    | TSPAN5             | 2,689 | 8,306  |
| 226657_at    | NATD1              | 2,687 | 11,198 |
| 201250_s_at  | SLC2A1             | 2,684 | 15,575 |
| 218729_at    | LXN                | 2,682 | 9,972  |
| 213553_x_at  | APOC1              | 2,674 | 27,614 |
| 213843_x_at  | SLC6A8             | 2,674 | 7,579  |
| 204466_s_at  | SNCA               | 2,672 | 4,022  |
| 209183_s_at  | C10orf10           | 2,668 | 15,53  |
| 208451_s_at  | C4B_2///C4B///C4A  | 2,661 | 18,218 |
| 200983_x_at  | CD59               | 2,629 | 6,672  |

Tabelle1

|              |             |       |        |
|--------------|-------------|-------|--------|
| 215054_at    | RGL3///EPOR | 2,628 | 12,849 |
| 213096_at    | TMCC2       | 2,615 | 6,604  |
| 210986_s_at  | TPM1        | 2,604 | 7,939  |
| 229740_at    | SMIM5       | 2,596 | 13,182 |
| 216925_s_at  | TAL1        | 2,594 | 10,978 |
| 231274_s_at  |             | 2,593 | 7,708  |
| 217274_x_at  | MYL4        | 2,588 | 13,148 |
| 209160_at    | AKR1C3      | 2,586 | 5,15   |
| 200985_s_at  | CD59        | 2,577 | 5,046  |
| 221747_at    | TNS1        | 2,571 | 6,87   |
| 203921_at    | CHST2       | 2,57  | 7,161  |
| 207542_s_at  | AQP1        | 2,56  | 7,747  |
| 209555_s_at  | CD36        | 2,515 | 2,908  |
| 226726_at    | MBOAT2      | 2,514 | 9,785  |
| 204187_at    | GMPR        | 2,511 | 5,738  |
| 227498_at    | SOX6        | 2,503 | 18,473 |
| 226599_at    | FHDC1       | 2,5   | 11,223 |
| 201333_s_at  | ARHGEF12    | 2,496 | 12,961 |
| 218644_at    | PLEK2       | 2,486 | 18,846 |
| 203680_at    | PRKAR2B     | 2,474 | 3,95   |
| 202729_s_at  | LTBP1       | 2,473 | 5,988  |
| 207854_at    | GYPE        | 2,424 | 14,651 |
| 203192_at    | ABCB6       | 2,416 | 14,91  |
| 222529_at    | SLC25A37    | 2,416 | 5,947  |
| 230788_at    | GCNT2       | 2,415 | 15,925 |
| 206647_at    | HBZ         | 2,409 | 14,398 |
| 239492_at    | SEC14L4     | 2,408 | 12,944 |
| 237515_at    | TMEM56      | 2,4   | 21,056 |
| 204467_s_at  | SNCA        | 2,394 | 4,721  |
| 225061_at    | DNAJA4      | 2,393 | 8,067  |
| 224970_at    | NFIA        | 2,392 | 7,638  |
| 226301_at    | SLC18B1     | 2,386 | 8,777  |
| 223044_at    | SLC40A1     | 2,384 | 3,101  |
| 237215_s_at  | TFRC        | 2,362 | 7,615  |
| 209963_s_at  | EPOR        | 2,358 | 23,981 |
| 203764_at    | DLGAP5      | 2,357 | 7,783  |
| 224829_at    | CPEB4       | 2,356 | 10,863 |
| 219992_at    | TAC3        | 2,355 | 14,966 |
| 204172_at    | CPOX        | 2,349 | 9,386  |
| 218978_s_at  | SLC25A37    | 2,348 | 10,582 |
| 211781_x_at  |             | 2,344 | 4,658  |
| 216594_x_at  | AKR1C1      | 2,335 | 14,628 |
| 224828_at    | CPEB4       | 2,331 | 8,783  |
| 239586_at    | FAM83A      | 2,331 | 8,534  |
| 213110_s_at  | COL4A5      | 2,326 | 2,855  |
| 201714_at    | TUBG1       | 2,324 | 11,413 |
| 209687_at    | CXCL12      | 2,307 | 6,313  |
| 225388_at    | TSPAN5      | 2,307 | 6,463  |
| 204624_at    | ATP7B       | 2,305 | 9,705  |
| 227473_at    |             | 2,288 | 10,542 |
| 223649_s_at  | SLC25A39    | 2,276 | 8,643  |
| 201249_at    | SLC2A1      | 2,268 | 15,235 |
| 201710_at    | MYBL2       | 2,268 | 6,544  |
| 240168_at    | XPO7        | 2,267 | 11,855 |
| 226121_at    | DHRS13      | 2,258 | 7,852  |
| 202125_s_at  | TRAK2       | 2,255 | 7,542  |
| 202947_s_at  | GYPC        | 2,254 | 4,219  |
| 1553219_a_at | AMMECR1     | 2,253 | 19,588 |
| 221824_s_at  | MARCH8      | 2,249 | 5,395  |
| 202151_s_at  | UBAC1       | 2,244 | 16,403 |
| 242601_at    | HEPACAM2    | 2,242 | 17,352 |
| 213288_at    | MBOAT2      | 2,238 | 8,849  |
| 202124_s_at  | TRAK2       | 2,225 | 6,376  |

Tabelle1

|              |                  |       |        |
|--------------|------------------|-------|--------|
| 201042_at    | TGM2             | 2,223 | 8,791  |
| 215449_at    | TSPO2            | 2,222 | 9,095  |
| 231933_at    | MARCH8           | 2,221 | 6,255  |
| 203502_at    | BPGM             | 2,219 | 3,504  |
| 222717_at    | SDPR             | 2,218 | 3,801  |
| 221932_s_at  | GLRX5            | 2,216 | 10,208 |
| 227703_s_at  | SYTL4            | 2,214 | 12,121 |
| 203382_s_at  | APOE             | 2,213 | 15,312 |
| 1553589_a_at | PDZK1IP1         | 2,211 | 11,984 |
| 210987_x_at  | TPM1             | 2,21  | 8,807  |
| 212055_at    | TPGS2            | 2,21  | 15,598 |
| 236305_at    | RFESD            | 2,209 | 15,527 |
| 209652_s_at  | PGF              | 2,208 | 35,633 |
| 220807_at    | HBQ1             | 2,201 | 12,826 |
| 222781_s_at  | C9orf40          | 2,188 | 14,266 |
| 205453_at    | HOXB2            | 2,173 | 2,263  |
| 214446_at    | ELL2             | 2,173 | 12,971 |
| 228766_at    | CD36             | 2,173 | 2,331  |
| 208459_s_at  | XPO7             | 2,172 | 13,925 |
| 202411_at    | IFI27            | 2,169 | 7,103  |
| 209773_s_at  | RRM2             | 2,169 | 5,428  |
| 213451_x_at  | TNXB///TNXA      | 2,169 | 17,618 |
| 205632_s_at  | PIP5K1B          | 2,155 | 8,407  |
| 203381_s_at  | APOE             | 2,149 | 11,967 |
| 1558152_at   | LOC100131262     | 2,146 | 13,66  |
| 228214_at    | SOX6             | 2,146 | 20,167 |
| 239205_s_at  | CR1L///CR1       | 2,143 | 9,64   |
| 223597_at    | ITLN1            | 2,14  | 22,172 |
| 227497_at    | SOX6             | 2,139 | 15,184 |
| 230988_at    | ADD2             | 2,137 | 9,73   |
| 218904_s_at  | C9orf40          | 2,134 | 16,367 |
| 212907_at    | SLC30A1          | 2,129 | 8,64   |
| 226806_s_at  | NFIA             | 2,129 | 7,775  |
| 242625_at    | RSAD2            | 2,125 | 5,877  |
| 201599_at    | OAT              | 2,119 | 5,725  |
| 221245_s_at  | FZD5             | 2,117 | 10,243 |
| 219148_at    | PBK              | 2,116 | 15,362 |
| 216333_x_at  | TNXB///TNXA      | 2,113 | 15,904 |
| 56748_at     | TRIM10           | 2,112 | 17,963 |
| 206093_x_at  | TNXB///TNXA      | 2,111 | 17,437 |
| 228195_at    | C2orf88          | 2,102 | 9,536  |
| 206116_s_at  | TPM1             | 2,094 | 9,997  |
| 218194_at    | REXO2            | 2,091 | 12,638 |
| 201734_at    | CLCN3            | 2,085 | 14,261 |
| 215812_s_at  | SLC6A10PB///SLC6 | 2,083 | 6,663  |
| 202459_s_at  | LPIN2            | 2,08  | 13,897 |
| 201890_at    | RRM2             | 2,079 | 4,828  |
| 236081_at    | SNCA             | 2,071 | 5,569  |
| 226751_at    | CNRIP1           | 2,063 | 4,308  |
| 224975_at    | NFIA             | 2,052 | 9,236  |
| 205919_at    | HBE1             | 2,051 | 15,701 |
| 218739_at    | ABHD5            | 2,043 | 16,337 |
| 234973_at    | SLC38A5          | 2,041 | 10,072 |
| 224831_at    | CPEB4            | 2,032 | 8,438  |
| 1554481_a_at | EPB41            | 2,029 | 4,74   |
| 1559172_at   |                  | 2,026 | 20,416 |
| 207332_s_at  | TFRC             | 2,026 | 6,959  |
| 219630_at    | PDZK1IP1         | 2,026 | 11,731 |
| 212312_at    | BCL2L1           | 2,025 | 4,877  |
| 39248_at     | AQP3             | 2,025 | 3,794  |
| 208886_at    | H1F0             | 2,023 | 2,358  |
| 208971_at    | UROD             | 2,017 | 19,027 |
| 209894_at    | LEPROT///LEPR    | 2,016 | 6,991  |

Tabelle1

|              |                  |       |        |
|--------------|------------------|-------|--------|
| 225687_at    | FAM83D           | 2,01  | 10,691 |
| 226811_at    | FAM46C           | 2,005 | 2,306  |
| 201059_at    | CTTN             | 2,003 | 10,988 |
| 223754_at    | C2orf88          | 2,001 | 14,724 |
| 1554334_a_at | DNAJA4           | 1,999 | 7,249  |
| 208970_s_at  | UROD             | 1,999 | 16,827 |
| 227959_at    | ANKRD9           | 1,997 | 13,364 |
| 203213_at    | CDK1             | 1,993 | 3,801  |
| 227309_at    | YOD1             | 1,992 | 4,813  |
| 202587_s_at  | AK1              | 1,989 | 7,209  |
| 219905_at    | ERMAP            | 1,989 | 14,477 |
| 203661_s_at  | TMOD1            | 1,985 | 6,071  |
| 227717_at    | ARHGEF37         | 1,982 | 15,324 |
| 208609_s_at  | TNXB///TNXA      | 1,974 | 17,69  |
| 212463_at    | CD59             | 1,974 | 4,905  |
| 221246_x_at  | TNS1             | 1,971 | 5,879  |
| 203289_s_at  | NPRL3            | 1,969 | 10,621 |
| 223989_s_at  | REXO2            | 1,969 | 10,439 |
| 212430_at    | RBM38            | 1,968 | 4,666  |
| 207043_s_at  | SLC6A9           | 1,967 | 12,239 |
| 206488_s_at  | CD36             | 1,966 | 2,211  |
| 237299_at    | NARF             | 1,956 | 10,312 |
| 204788_s_at  | PPOX             | 1,949 | 15,826 |
| 219918_s_at  | ASPM             | 1,946 | 4,385  |
| 225235_at    | TSPAN17          | 1,943 | 15,16  |
| 224690_at    | FAM210B          | 1,942 | 5,638  |
| 218487_at    | ALAD             | 1,939 | 14,141 |
| 215037_s_at  | BCL2L1           | 1,934 | 4,055  |
| 218456_at    | CAPRIN2          | 1,932 | 6,28   |
| 214273_x_at  | NPRL3            | 1,927 | 11,041 |
| 222666_s_at  | RCL1             | 1,921 | 13,369 |
| 206177_s_at  | ARG1             | 1,92  | 3,527  |
| 212166_at    | XPO7             | 1,916 | 10,605 |
| 242939_at    | TFDP1            | 1,913 | 7,373  |
| 207883_s_at  | TFR2             | 1,91  | 9,059  |
| 1553808_a_at | NKX2-3           | 1,908 | 2,454  |
| 204147_s_at  | TFDP1            | 1,905 | 10,076 |
| 1554918_a_at | ABCC4            | 1,9   | 6,376  |
| 40850_at     | FKBP8            | 1,898 | 6,733  |
| 226099_at    | ELL2             | 1,893 | 4,993  |
| 228802_at    | RBPMS2           | 1,893 | 7,558  |
| 227395_at    | TBCEL            | 1,892 | 15,594 |
| 212181_s_at  | NUDT4P1///NUDT4I | 1,889 | 13,376 |
| 223266_at    | STRADB           | 1,888 | 4,585  |
| 207827_x_at  | SNCA             | 1,885 | 3,917  |
| 202728_s_at  | LTBP1            | 1,874 | 6,705  |
| 218417_s_at  | SLC48A1          | 1,865 | 6,648  |
| 203196_at    | ABCC4            | 1,859 | 5,766  |
| 237336_at    | ADD2             | 1,856 | 15,444 |
| 221210_s_at  | NPL              | 1,855 | 3,979  |
| 209339_at    | SIAH2            | 1,853 | 6,596  |
| 201131_s_at  | CDH1             | 1,85  | 8,115  |
| 212330_at    | TFDP1            | 1,843 | 9,65   |
| 203588_s_at  | TFDP2            | 1,842 | 5,486  |
| 203868_s_at  | VCAM1            | 1,841 | 10,907 |
| 212989_at    | SGMS1            | 1,84  | 6,474  |
| 206665_s_at  | BCL2L1           | 1,838 | 4,066  |
| 203925_at    | GCLM             | 1,836 | 5,726  |
| 231616_at    |                  | 1,836 | 12,511 |
| 231997_at    | TBCEL            | 1,835 | 12,918 |
| 202705_at    | CCNB2            | 1,832 | 3,375  |
| 210177_at    | TRIM15           | 1,832 | 19,219 |
| 208601_s_at  | TUBB1            | 1,83  | 6,789  |

Tabelle1

|              |                  |       |        |
|--------------|------------------|-------|--------|
| 222074_at    | UROD             | 1,826 | 11,135 |
| 228361_at    | E2F2             | 1,821 | 4,831  |
| 1558290_a_at | MIR1204///PVT1   | 1,818 | 6,145  |
| 225167_at    | FRMD4A           | 1,817 | 5,278  |
| 224987_at    | C6orf89          | 1,815 | 10,18  |
| 225847_at    | NCEH1            | 1,815 | 5,435  |
| 206302_s_at  | NUDT4P1///NUDT4I | 1,811 | 8,154  |
| 207165_at    | HMMR             | 1,809 | 3,309  |
| 205601_s_at  | HOXB5            | 1,806 | 5,529  |
| 221487_s_at  | ENSA             | 1,797 | 15,098 |
| 238460_at    | FAM83A           | 1,791 | 16,291 |
| 203725_at    | GADD45A          | 1,789 | 4,194  |
| 1554333_at   | DNAJA4           | 1,787 | 8,033  |
| 238741_at    | FAM83A           | 1,787 | 8,731  |
| 205046_at    | CENPE            | 1,786 | 7,505  |
| 213797_at    | RSAD2            | 1,786 | 5,947  |
| 203666_at    | CXCL12           | 1,785 | 4,555  |
| 218863_s_at  | TNS1             | 1,785 | 17,772 |
| 215499_at    | LOC100996792///M | 1,776 | 8,571  |
| 210429_at    | RHD              | 1,771 | 11,437 |
| 229114_at    | GAB1             | 1,771 | 7,379  |
| 229725_at    | ACSL6            | 1,77  | 9,181  |
| 225168_at    | FRMD4A           | 1,768 | 5,444  |
| 221606_s_at  | HMG5             | 1,766 | 5,463  |
| 224976_at    | NFIA             | 1,76  | 7,66   |
| 217736_s_at  | EIF2AK1          | 1,759 | 13,375 |
| 224186_s_at  | RNF123           | 1,758 | 8,321  |
| 244482_at    |                  | 1,755 | 5,268  |
| 202492_at    | ATG9A            | 1,753 | 9,262  |
| 203845_at    | KAT2B            | 1,753 | 6,103  |
| 225270_at    | NEO1             | 1,75  | 12,271 |
| 203608_at    | ALDH5A1          | 1,748 | 3,445  |
| 217735_s_at  | EIF2AK1          | 1,738 | 8,36   |
| 201732_s_at  | CLCN3            | 1,736 | 10,917 |
| 210579_s_at  | TRIM10           | 1,736 | 12,611 |
| 209182_s_at  | C10orf10         | 1,729 | 20,483 |
| 225997_at    | MOB1B            | 1,725 | 9,951  |
| 206494_s_at  | ITGA2B           | 1,72  | 2,599  |
| 200697_at    | HK1              | 1,716 | 5,169  |
| 207793_s_at  | EPB41            | 1,711 | 4,469  |
| 201735_s_at  | CLCN3            | 1,709 | 9,478  |
| 210052_s_at  | TPX2             | 1,708 | 4,103  |
| 200984_s_at  | CD59             | 1,707 | 4,427  |
| 201060_x_at  | STOM             | 1,707 | 4,731  |
| 228220_at    | FCHO2            | 1,707 | 4,177  |
| 202218_s_at  | FADS2            | 1,705 | 4,335  |
| 223405_at    | NPL              | 1,705 | 3,188  |
| 213407_at    | PHLPP2           | 1,704 | 8,117  |
| 202460_s_at  | LPIN2            | 1,699 | 12,497 |
| 217879_at    | CDC27            | 1,695 | 15,315 |
| 227400_at    | NFIX             | 1,695 | 3,168  |
| 234986_at    | GCLM             | 1,695 | 6,639  |
| 208691_at    | TFRC             | 1,691 | 6,415  |
| 209764_at    | MGAT3            | 1,691 | 9,39   |
| 212741_at    | MAOA             | 1,688 | 8,839  |
| 204641_at    | NEK2             | 1,679 | 4,59   |
| 218355_at    | KIF4A            | 1,679 | 6,177  |
| 227725_at    | ST6GALNAC1       | 1,677 | 60,004 |
| 212183_at    | NUDT4P1///NUDT4  | 1,676 | 6,199  |
| 221011_s_at  | LBH              | 1,673 | 5,054  |
| 203031_s_at  | UROS             | 1,671 | 10,013 |
| 201195_s_at  | SLC7A5           | 1,67  | 3,849  |
| 201785_at    | RNASE1           | 1,669 | 5,804  |

Tabelle1

|              |                 |       |        |
|--------------|-----------------|-------|--------|
| 202923_s_at  | GCLC            | 1,665 | 11,051 |
| 218489_s_at  | ALAD            | 1,664 | 11,833 |
| 203418_at    | CCNA2           | 1,66  | 4,597  |
| 219978_s_at  | NUSAP1          | 1,66  | 4,738  |
| 202074_s_at  | OPTN            | 1,659 | 2,569  |
| 213523_at    | CCNE1           | 1,659 | 6,505  |
| 239206_at    | CR1L            | 1,655 | 15,694 |
| 211546_x_at  | SNCA            | 1,653 | 4,048  |
| 239872_at    |                 | 1,653 | 16,451 |
| 204779_s_at  | HOXB7           | 1,652 | 4,6    |
| 218711_s_at  | SDPR            | 1,65  | 4,736  |
| 226002_at    | GAB1            | 1,648 | 7,455  |
| 219332_at    | MICALL2         | 1,646 | 4,593  |
| 222678_s_at  | DCUN1D1         | 1,642 | 7,271  |
| 221809_at    | RANBP10         | 1,641 | 8,138  |
| 53987_at     | RANBP10         | 1,641 | 11,382 |
| 227099_s_at  | C11orf96        | 1,64  | 4,271  |
| 223094_s_at  | ANKH            | 1,638 | 5,733  |
| 202364_at    | MXI1            | 1,636 | 6,608  |
| 208820_at    | PTK2            | 1,636 | 4,176  |
| 210638_s_at  | FBXO9           | 1,635 | 10,837 |
| 203911_at    | RAP1GAP         | 1,634 | 4,133  |
| 36742_at     | TRIM15          | 1,632 | 12,513 |
| 225974_at    | TMEM64          | 1,629 | 4,922  |
| 225353_s_at  | C1QC            | 1,626 | 2,804  |
| 203097_s_at  | RAPGEF2         | 1,625 | 6,849  |
| 221520_s_at  | CDCA8           | 1,623 | 4,005  |
| 217880_at    | CDC27           | 1,621 | 6,986  |
| 221425_s_at  | ISCA1           | 1,621 | 6,981  |
| 204822_at    | TTK             | 1,62  | 4,409  |
| 218009_s_at  | PRC1            | 1,62  | 4,084  |
| 210672_s_at  | NPRL3           | 1,616 | 9,979  |
| 221479_s_at  | BNIP3L          | 1,613 | 5,355  |
| 205667_at    | WRN             | 1,612 | 14,358 |
| 215017_s_at  | FNBP1L          | 1,612 | 3,518  |
| 1553993_s_at | MIR6800///MED25 | 1,611 | 9,522  |
| 211992_at    | WNK1            | 1,611 | 8,75   |
| 210151_s_at  | DYRK3           | 1,6   | 6,235  |
| 212473_s_at  | MICAL2          | 1,599 | 2,772  |
| 224905_at    | WDR26           | 1,599 | 7,227  |
| 218136_s_at  | SLC25A37        | 1,598 | 6,389  |
| 222513_s_at  | SORBS1          | 1,598 | 8,037  |
| 230840_at    | SMIM1           | 1,598 | 17,597 |
| 201733_at    | CLCN3           | 1,593 | 8,161  |
| 221063_x_at  | RNF123          | 1,593 | 11,681 |
| 225051_at    | EPB41           | 1,59  | 5,582  |
| 204627_s_at  | ITGB3           | 1,589 | 3,263  |
| 225998_at    | GAB1            | 1,589 | 9,666  |
| 214710_s_at  | CCNB1           | 1,587 | 4,006  |
| 220306_at    | FAM46C          | 1,585 | 2,451  |
| 201178_at    | FBXO7           | 1,583 | 9,575  |
| 1555039_a_at | ABCC4           | 1,581 | 6,177  |
| 201764_at    | TMEM106C        | 1,581 | 4,087  |
| 217878_s_at  | CDC27           | 1,579 | 12,939 |
| 222958_s_at  | DEPDC1          | 1,579 | 5,877  |
| 205856_at    | SLC14A1         | 1,575 | 4,837  |
| 210357_s_at  | SMOX            | 1,574 | 4,44   |
| 217881_s_at  | CDC27           | 1,573 | 14,004 |
| 213067_at    | MYH10           | 1,572 | 14,376 |
| 218039_at    | NUSAP1          | 1,572 | 4,028  |
| 227230_s_at  | KIAA1211        | 1,572 | 2,834  |
| 218663_at    | NCAPG           | 1,571 | 4,412  |
| 223092_at    | ANKH            | 1,571 | 2,644  |



Tabelle1

|              |                  |       |        |
|--------------|------------------|-------|--------|
| 211458_s_at  | GABARAPL3///GAB. | 1,57  | 2,711  |
| 232278_s_at  | DEPDC1           | 1,567 | 10,479 |
| 209273_s_at  | ISCA1            | 1,566 | 7,832  |
| 218853_s_at  | MOSPD1           | 1,56  | 8,947  |
| 219546_at    | BMP2K            | 1,559 | 5,512  |
| 219785_s_at  | C16orf95         | 1,559 | 12,794 |
| 222653_at    | PNPO             | 1,559 | 13,84  |
| 202456_s_at  | ZER1             | 1,558 | 7,681  |
| 211994_at    | WNK1             | 1,557 | 8,249  |
| 208110_x_at  | MED25            | 1,555 | 26,359 |
| 218585_s_at  | DTL              | 1,554 | 3,767  |
| 228323_at    | KNL1             | 1,552 | 5,502  |
| 207357_s_at  | GALNT10          | 1,546 | 7,359  |
| 203214_x_at  | CDK1             | 1,545 | 3,985  |
| 48106_at     | SLC48A1          | 1,54  | 10,927 |
| 209709_s_at  | HMMR             | 1,539 | 3,81   |
| 211003_x_at  | TGM2             | 1,539 | 20,062 |
| 230958_s_at  |                  | 1,538 | 5,267  |
| 206680_at    | CD5L             | 1,537 | 17,043 |
| 202503_s_at  | KIAA0101         | 1,534 | 2,796  |
| 204826_at    | CCNF             | 1,532 | 6,485  |
| 214716_at    | BMP2K            | 1,532 | 11,263 |
| 226541_at    | FBXO30           | 1,532 | 10,21  |
| 242282_at    | ZFPM1            | 1,532 | 13,369 |
| 204540_at    | EEF1A2           | 1,527 | 5,607  |
| 1555680_a_at | SMOX             | 1,526 | 5,683  |
| 237568_at    |                  | 1,526 | 5,947  |
| 210559_s_at  | CDK1             | 1,521 | 3,131  |
| 239723_at    |                  | 1,521 | 6,162  |
| 202870_s_at  | CDC20            | 1,52  | 3,158  |
| 222200_s_at  | BSDC1            | 1,52  | 9,694  |
| 202095_s_at  | BIRC5            | 1,519 | 3,452  |
| 207828_s_at  | CENPF            | 1,517 | 3,563  |
| 230240_at    |                  | 1,517 | 15,057 |
| 205600_x_at  | HOXB5            | 1,515 | 3,936  |
| 225665_at    | ZAK              | 1,515 | 2,807  |
| 206632_s_at  | APOBEC3B         | 1,514 | 3,378  |
| 208677_s_at  | BSG              | 1,511 | 8,339  |
| 225689_at    | POMGNT2          | 1,511 | 11,085 |
| 1562981_at   | HBB              | 1,51  | 7,4    |
| 1554423_a_at | FBXO7            | 1,508 | 8,905  |
| 224693_at    | FAM210B          | 1,507 | 5,311  |
| 213256_at    | MARCH3           | 1,505 | 7,399  |
| 201061_s_at  | STOM             | 1,503 | 4,797  |
| 207801_s_at  | RNF10            | 1,503 | 5,06   |
| 228527_s_at  | SLC25A37         | 1,502 | 3,941  |
| 214530_x_at  | EPB41            | 1,501 | 7,589  |
| 216973_s_at  | HOXB7            | 1,5   | 3,948  |
| 227506_at    | SLC16A9          | 1,5   | 6,323  |
| 204603_at    | EXO1             | 1,498 | 7,173  |
| 238058_at    | PRR34-AS1        | 1,493 | 4,288  |
| 212694_s_at  | PCCB             | 1,491 | 8,494  |
| 214769_at    | CLCN4            | 1,49  | 43,53  |
| 217047_s_at  | FAM13A           | 1,49  | 4,933  |
| 228865_at    | C1orf116         | 1,49  | 41,911 |
| 215150_at    | YOD1             | 1,479 | 4,156  |
| 239327_at    |                  | 1,479 | 12,154 |
| 215509_s_at  | BUB1             | 1,478 | 4,688  |
| 208335_s_at  | ACKR1            | 1,475 | 10,252 |
| 219168_s_at  | PRR5             | 1,475 | 5,854  |
| 216063_at    | HBBP1            | 1,473 | 4,28   |
| 204611_s_at  | PPP2R5B          | 1,471 | 8,721  |
| 207220_at    | ART4             | 1,47  | 20,569 |

Tabelle1

|              |                   |       |        |
|--------------|-------------------|-------|--------|
| 238752_at    | GPLD1             | 1,469 | 66,498 |
| 202554_s_at  | GSTM3             | 1,468 | 7,53   |
| 221486_at    | ENSA              | 1,467 | 6,623  |
| 213693_s_at  | MUC1              | 1,466 | 5,287  |
| 206110_at    | HIST1H3F///HIST1H | 1,465 | 3,43   |
| 218107_at    | WDR26             | 1,463 | 12,454 |
| 219361_s_at  | AEN               | 1,459 | 8,067  |
| 210655_s_at  | FOXO3B///FOXO3    | 1,457 | 3,169  |
| 229696_at    | FECH              | 1,457 | 7,699  |
| 204321_at    | NEO1              | 1,456 | 8,14   |
| 236140_at    | GCLM              | 1,456 | 3,624  |
| 213115_at    | ATG4A             | 1,454 | 21,061 |
| 219990_at    | E2F8              | 1,454 | 5,037  |
| 1568629_s_at | PIK3R2            | 1,453 | 9,795  |
| 223124_s_at  | PITHD1            | 1,453 | 4,847  |
| 205012_s_at  | HAGH              | 1,452 | 8,618  |
| 213805_at    | ABHD5             | 1,452 | 4,869  |
| 218653_at    | SLC25A15          | 1,451 | 6,952  |
| 235117_at    | CHAC2             | 1,45  | 8,346  |
| 226661_at    | CDCA2             | 1,448 | 5,034  |
| 225780_at    | DDI2///RSC1A1     | 1,447 | 9,413  |
| 207667_s_at  | LOC100996792///M/ | 1,446 | 6,997  |
| 218726_at    | HJURP             | 1,444 | 4,724  |
| 200615_s_at  | AP2B1             | 1,443 | 10,244 |
| 230760_at    | ZFY               | 1,438 | 2,46   |
| 204767_s_at  | FEN1              | 1,437 | 4,215  |
| 210334_x_at  | BIRC5             | 1,437 | 4,444  |
| 226446_at    | HES6              | 1,437 | 4,407  |
| 222421_at    | UBE2H             | 1,435 | 7,631  |
| 206303_s_at  | NUDT4P1///NUDT4I  | 1,433 | 5,469  |
| 223229_at    | UBE2T             | 1,433 | 5,003  |
| 209274_s_at  | ISCA1             | 1,429 | 7,86   |
| 212478_at    | RMND5A            | 1,429 | 5,914  |
| 211355_x_at  | LEPROT///LEPR     | 1,428 | 8,81   |
| 226287_at    | CCDC34            | 1,428 | 6,213  |
| 204092_s_at  | AURKA             | 1,427 | 3,782  |
| 238879_at    | DCUN1D1           | 1,427 | 15,221 |
| 1554830_a_at | STEAP3            | 1,426 | 8,739  |
| 213134_x_at  | BTG3              | 1,423 | 3,019  |
| 228090_at    | NMNAT3            | 1,423 | 5,462  |
| 209172_s_at  | CENPF             | 1,421 | 5,681  |
| 218544_s_at  | RCL1              | 1,418 | 12,295 |
| 232238_at    | ASPM              | 1,418 | 5,308  |
| 237590_at    |                   | 1,418 | 7,748  |
| 237618_at    |                   | 1,418 | 7,529  |
| 203589_s_at  | TFDP2             | 1,417 | 4,547  |
| 209930_s_at  | NFE2              | 1,415 | 3,015  |
| 213617_s_at  | TPGS2             | 1,415 | 9,748  |
| 1554696_s_at | TYMS              | 1,411 | 2,795  |
| 202409_at    | INS-IGF2///IGF2   | 1,404 | 8,081  |
| 236379_at    |                   | 1,404 | 4,065  |
| 205085_at    | ORC1              | 1,403 | 7,757  |
| 224445_s_at  | ZFYVE21           | 1,401 | 6,954  |
| 218034_at    | FIS1              | 1,4   | 6,224  |
| 201039_s_at  | RAD23A            | 1,399 | 12,256 |
| 204825_at    | MELK              | 1,396 | 4,009  |
| 221258_s_at  | KIF18A            | 1,396 | 5,583  |
| 203099_s_at  | CDYL              | 1,395 | 5,168  |
| 225259_at    | RAB6B             | 1,395 | 8,526  |
| 239832_at    |                   | 1,395 | 4,462  |
| 203016_s_at  | SSX2IP            | 1,393 | 5,771  |
| 219787_s_at  | ECT2              | 1,393 | 4,477  |
| 225792_at    | HOOK1             | 1,393 | 10,637 |

Tabelle1

|              |                   |       |        |
|--------------|-------------------|-------|--------|
| 205164_at    | GCAT              | 1,391 | 9,321  |
| 211993_at    | WNK1              | 1,388 | 5,773  |
| 39249_at     | AQP3              | 1,386 | 7,592  |
| 59644_at     | BMP2K             | 1,384 | 5,834  |
| 202974_at    | MPP1              | 1,383 | 6,781  |
| 201046_s_at  | RAD23A            | 1,379 | 12,246 |
| 214020_x_at  | ITGB5             | 1,379 | 4,996  |
| 1561130_at   | HECTD4            | 1,377 | 6,433  |
| 212987_at    | FBXO9             | 1,376 | 7,284  |
| 202087_s_at  | CTSL              | 1,375 | 2,492  |
| 214768_x_at  | IGKC              | 1,375 | 2,394  |
| 203967_at    | CDC6              | 1,374 | 6,66   |
| 209490_s_at  | EGFL8///PPT2      | 1,374 | 5,476  |
| 240237_at    |                   | 1,374 | 24,84  |
| 204962_s_at  | SLC35F6///CENPA   | 1,372 | 4,547  |
| 235545_at    | DEPDC1            | 1,372 | 7,107  |
| 238519_at    | DDI2///RSC1A1     | 1,372 | 8,899  |
| 202455_at    | HDAC5             | 1,371 | 3,527  |
| 202973_x_at  | FAM13A            | 1,37  | 5,218  |
| 225834_at    | FAM72A///FAM72D/  | 1,368 | 2,582  |
| 212224_at    | ALDH1A1           | 1,367 | 3,143  |
| 217354_s_at  | HPS1              | 1,366 | 5,341  |
| 40093_at     | BCAM              | 1,366 | 7,355  |
| 226980_at    | DEPDC1B           | 1,364 | 3,083  |
| 238117_at    | PPOX              | 1,363 | 17,996 |
| 209817_at    | PPP3CB            | 1,361 | 10,442 |
| 220651_s_at  | MCM10             | 1,361 | 4,687  |
| 211080_s_at  | NEK2              | 1,359 | 7,54   |
| 233123_at    | SLC40A1           | 1,359 | 5,046  |
| 237762_at    |                   | 1,359 | 23,751 |
| 212472_at    | MICAL2            | 1,358 | 3,014  |
| 222420_s_at  | UBE2H             | 1,356 | 3,698  |
| 205548_s_at  | BTG3              | 1,355 | 3,422  |
| 213092_x_at  | DNAJC9            | 1,354 | 7,827  |
| 224752_at    | LOC101930655///C7 | 1,354 | 9,438  |
| 201759_at    | TBCD              | 1,353 | 6,338  |
| 209807_s_at  | NFIX              | 1,353 | 4,459  |
| 635_s_at     | PPP2R5B           | 1,352 | 9,604  |
| 244875_at    | ASMTL-AS1         | 1,351 | 4,509  |
| 226853_at    | BMP2K             | 1,349 | 6,129  |
| 241542_at    |                   | 1,348 | 20,62  |
| 214464_at    | CDC42BPA          | 1,347 | 6,165  |
| 218872_at    | TESC              | 1,347 | 2,966  |
| 223199_at    | MKNK2             | 1,345 | 7,235  |
| 219306_at    | KIF15             | 1,344 | 4,122  |
| 225133_at    | KLF3              | 1,343 | 4,832  |
| 211034_s_at  | HECTD4            | 1,341 | 11,31  |
| 204026_s_at  | ZWINT             | 1,34  | 3,366  |
| 209924_at    | CCL18             | 1,34  | 7,676  |
| 230006_s_at  | SVIP              | 1,34  | 4,223  |
| 237398_at    |                   | 1,337 | 4,565  |
| 213549_at    | PDZD8             | 1,334 | 2,288  |
| 224790_at    | ASAP1             | 1,331 | 3,186  |
| 240781_x_at  | DCUN1D1           | 1,331 | 13,536 |
| 1553976_a_at | DPCD              | 1,329 | 8,858  |
| 1556499_s_at | COL1A1            | 1,329 | 5,209  |
| 204162_at    | NDC80             | 1,329 | 4,154  |
| 211356_x_at  | LEPROT///LEPR     | 1,329 | 7,301  |
| 225163_at    | FRMD4A            | 1,329 | 7,688  |
| 202922_at    | GCLC              | 1,328 | 8,665  |
| 219856_at    | C1orf116          | 1,327 | 40,289 |
| 213008_at    | FANCI             | 1,326 | 3,718  |
| 218424_s_at  | STEAP3            | 1,325 | 5,432  |

Tabelle1

|              |                   |       |        |
|--------------|-------------------|-------|--------|
| 229151_at    | SLC14A1           | 1,325 | 3,203  |
| 205352_at    | SERPINI1          | 1,324 | 7,227  |
| 243806_at    |                   | 1,324 | 2,865  |
| 205148_s_at  | CLCN4             | 1,323 | 15,069 |
| 215811_at    |                   | 1,321 | 3,146  |
| 222422_s_at  | NDFIP1            | 1,32  | 2,83   |
| 232424_at    | PRDM16            | 1,319 | 2,643  |
| 211573_x_at  | TGM2              | 1,318 | 15,823 |
| 223812_at    | FAM178B           | 1,318 | 6,449  |
| 226747_at    | TXNDC16           | 1,317 | 8,273  |
| 202732_at    | PKIG              | 1,316 | 4,078  |
| 215684_s_at  | ASCC2             | 1,314 | 7,243  |
| 221962_s_at  | UBE2H             | 1,313 | 3,772  |
| 205570_at    | PIP4K2A           | 1,307 | 4,854  |
| 209314_s_at  | HBS1L             | 1,307 | 4,853  |
| 223374_s_at  | B3GALNT1          | 1,307 | 3,276  |
| 233371_at    | ABCC13            | 1,306 | 6,964  |
| 217799_x_at  | UBE2H             | 1,303 | 4,374  |
| 1559520_at   | GYPA              | 1,301 | 18,971 |
| 242384_at    |                   | 1,301 | 7,275  |
| 204709_s_at  | KIF23             | 1,3   | 4,386  |
| 224789_at    | DCAF12            | 1,3   | 2,464  |
| 226982_at    | ELL2              | 1,3   | 2,329  |
| 211700_s_at  | TRO               | 1,299 | 4,126  |
| 1554408_a_at | TK1               | 1,297 | 3,543  |
| 204132_s_at  | FOXO3B///FOXO3    | 1,295 | 4,79   |
| 223063_at    | C1orf198          | 1,292 | 8,556  |
| 218662_s_at  | NCAPG             | 1,29  | 4,597  |
| 203554_x_at  | PTTG1             | 1,288 | 4,72   |
| 214428_x_at  | C4B_2///C4B///C4A | 1,288 | 11,478 |
| 47069_at     | PRR5              | 1,288 | 5,886  |
| 1552583_s_at | ABCC13            | 1,286 | 6,598  |
| 204444_at    | KIF11             | 1,286 | 2,588  |
| 202310_s_at  | COL1A1            | 1,285 | 7,482  |
| 207112_s_at  | GAB1              | 1,283 | 7,854  |
| 226461_at    | HOXB9             | 1,283 | 3,906  |
| 203017_s_at  | SSX2IP            | 1,282 | 4,299  |
| 205909_at    | POLE2             | 1,282 | 4,778  |
| 223223_at    | ARV1              | 1,282 | 8,241  |
| 205436_s_at  | H2AFX             | 1,281 | 4,805  |
| 222680_s_at  | DTL               | 1,281 | 3,763  |
| 226214_at    | GDE1              | 1,281 | 7,958  |
| 1555292_at   | STRIP2            | 1,279 | 25,28  |
| 202940_at    | WNK1              | 1,279 | 6,958  |
| 216398_at    | GYPB              | 1,279 | 8,042  |
| 1557055_s_at | LINC01128         | 1,276 | 5,458  |
| 204568_at    | ATG14             | 1,276 | 9,585  |
| 228073_at    | NANP              | 1,276 | 7,093  |
| 1569617_at   | OSBP2             | 1,274 | 4,274  |
| 217572_at    |                   | 1,274 | 3,495  |
| 215342_s_at  | RABGAP1L          | 1,273 | 4,658  |
| 204389_at    | MAOA              | 1,272 | 12,482 |
| 223320_s_at  | ABCB10            | 1,272 | 4,832  |
| 203894_at    | TUBG2             | 1,271 | 9,264  |
| 212949_at    | NCAPH             | 1,27  | 3,756  |
| 215498_s_at  | LOC100996792///M/ | 1,269 | 4,563  |
| 204292_x_at  | STK11             | 1,268 | 6,272  |
| 204827_s_at  | CCNF              | 1,268 | 19,9   |
| 235173_at    | MBNL1-AS1         | 1,266 | 5,463  |
| 202468_s_at  | CTNNAL1           | 1,264 | 3,407  |
| 223012_at    | MIR4746///UBXN6   | 1,264 | 5,865  |
| 236611_at    | LOC101928000      | 1,263 | 5,747  |
| 225755_at    | KLHDC8B           | 1,262 | 5,54   |

Tabelle1

|              |            |       |        |
|--------------|------------|-------|--------|
| 242338_at    | TMEM64     | 1,261 | 6,765  |
| 202589_at    | TYMS       | 1,26  | 2,366  |
| 204131_s_at  | FOXO3      | 1,259 | 4,659  |
| 218416_s_at  | SLC48A1    | 1,258 | 7,156  |
| 204127_at    | RFC3       | 1,257 | 5,236  |
| 210112_at    | HPS1       | 1,256 | 8,885  |
| 211379_x_at  | B3GALNT1   | 1,256 | 2,76   |
| 204170_s_at  | CKS2       | 1,255 | 2,891  |
| 212479_s_at  | RMND5A     | 1,255 | 7,384  |
| 202593_s_at  | GDE1       | 1,254 | 8,543  |
| 211434_s_at  | CCRL2      | 1,254 | 5,755  |
| 217882_at    | EMC3       | 1,254 | 10,321 |
| 225606_at    | BCL2L11    | 1,254 | 3,44   |
| 209714_s_at  | CDKN3      | 1,253 | 3,729  |
| 212022_s_at  | MKI67      | 1,253 | 2,79   |
| 229610_at    | CKAP2L     | 1,253 | 5,081  |
| 221436_s_at  | CDCA3      | 1,251 | 4,029  |
| 202130_at    | RIOK3      | 1,25  | 4,999  |
| 204379_s_at  | FGFR3      | 1,25  | 7,214  |
| 235796_at    |            | 1,25  | 6,855  |
| 239370_at    | LINC01133  | 1,25  | 49,764 |
| 228729_at    | CCNB1      | 1,249 | 4,214  |
| 202580_x_at  | FOXMI      | 1,248 | 2,943  |
| 213457_at    | MFHAS1     | 1,248 | 5,376  |
| 218741_at    | CENPM      | 1,248 | 3,453  |
| 1565862_a_at |            | 1,247 | 8,337  |
| 213088_s_at  | DNAJC9     | 1,247 | 6,699  |
| 217889_s_at  | CYBRD1     | 1,247 | 3,538  |
| 209408_at    | KIF2C      | 1,244 | 4,134  |
| 225252_at    | SRXN1      | 1,243 | 4,276  |
| 211020_at    | GCNT2      | 1,242 | 33,969 |
| 1569090_x_at | LINC00957  | 1,241 | 4,083  |
| 209316_s_at  | HBS1L      | 1,241 | 8,999  |
| 203015_s_at  | SSX2IP     | 1,239 | 8,175  |
| 1557455_s_at | MOSPD1     | 1,238 | 5,93   |
| 210652_s_at  | TTC39A     | 1,238 | 7,104  |
| 217748_at    | ADIPOR1    | 1,237 | 3,757  |
| 204388_s_at  | MAOA       | 1,236 | 14,362 |
| 1566509_s_at | FBXO9      | 1,234 | 9,023  |
| 242280_x_at  | CPEB4      | 1,234 | 3,235  |
| 209391_at    | DPM2       | 1,232 | 13,508 |
| 210075_at    | MARCH2     | 1,232 | 4,509  |
| 212804_s_at  | GAPVD1     | 1,232 | 11,825 |
| 223519_at    | ZAK        | 1,232 | 2,73   |
| 201644_at    | TSTA3      | 1,23  | 6,214  |
| 212226_s_at  | PLPP3      | 1,23  | 3,621  |
| 226801_s_at  | AIDA       | 1,23  | 7,029  |
| 211804_s_at  | CDK2       | 1,229 | 4,515  |
| 218999_at    | TMEM140    | 1,229 | 4,464  |
| 229889_at    | LRRC75A    | 1,229 | 21,495 |
| 211396_at    | FCGR2C     | 1,227 | 6,707  |
| 227187_at    | CBLL1      | 1,227 | 4,756  |
| 227291_s_at  | BOLA3      | 1,227 | 5,742  |
| 202844_s_at  | RALBP1     | 1,225 | 7,369  |
| 221551_x_at  | ST6GALNAC4 | 1,225 | 5,178  |
| 217640_x_at  | SKA1       | 1,223 | 11,867 |
| 223549_s_at  | ESPN       | 1,223 | 4,552  |
| 233613_x_at  | REXO2      | 1,223 | 13,059 |
| 1558143_a_at | BCL2L11    | 1,221 | 3,554  |
| 205197_s_at  | ATP7A      | 1,221 | 9,4    |
| 242197_x_at  | CD36       | 1,22  | 2,184  |
| 219493_at    | SHCBP1     | 1,218 | 2,287  |
| 227993_at    | METAP2     | 1,217 | 11,66  |

Tabelle1

|              |              |       |        |
|--------------|--------------|-------|--------|
| 221478_at    | BNIP3L       | 1,214 | 3,897  |
| 212021_s_at  | MKI67        | 1,213 | 3,176  |
| 224889_at    | FOXO3        | 1,213 | 4,119  |
| 226055_at    | ARRDC2       | 1,213 | 6,478  |
| 238901_at    | LINC01133    | 1,212 | 23,216 |
| 209900_s_at  | SLC16A1      | 1,21  | 3,476  |
| 226674_at    | SHISA4       | 1,209 | 20,797 |
| 226686_at    | CISD2        | 1,207 | 4,82   |
| 209216_at    | WDR45        | 1,206 | 7,46   |
| 209642_at    | BUB1         | 1,206 | 3,053  |
| 230005_at    | SVIP         | 1,206 | 3,855  |
| 224897_at    | WDR26        | 1,205 | 6,054  |
| 227347_x_at  | HES4         | 1,205 | 6,413  |
| 228278_at    | NFIX         | 1,205 | 3,012  |
| 204649_at    | TROAP        | 1,204 | 2,518  |
| 229097_at    | DIAPH3       | 1,204 | 5,801  |
| 212355_at    | KHNYN        | 1,203 | 11,295 |
| 226689_at    | CISD2        | 1,203 | 6,389  |
| 204256_at    | ELOVL6       | 1,202 | 2,9    |
| 212023_s_at  | MKI67        | 1,202 | 3,008  |
| 215942_s_at  | GTSE1        | 1,202 | 4,894  |
| 225766_s_at  | TNPO1        | 1,202 | 6,46   |
| 224802_at    | NDFIP2       | 1,201 | 3,127  |
| 224898_at    | WDR26        | 1,2   | 5,975  |
| 225830_at    | PDZD8        | 1,2   | 3,125  |
| 217841_s_at  | PPME1        | 1,199 | 4,423  |
| 203810_at    | DNAJB4       | 1,197 | 6,567  |
| 211633_x_at  |              | 1,197 | 2,531  |
| 222039_at    | KIF18B       | 1,196 | 3,056  |
| 241060_x_at  |              | 1,196 | 12,706 |
| 220173_at    | BBOF1        | 1,195 | 5,391  |
| 207511_s_at  | CNPPD1       | 1,194 | 4,232  |
| 212077_at    | CALD1        | 1,193 | 7,543  |
| 213152_s_at  | SRSF8        | 1,193 | 2,706  |
| 231021_at    | SLC6A19      | 1,193 | 4,541  |
| 210127_at    | RAB6B        | 1,192 | 12,157 |
| 241881_at    | TRIM58       | 1,191 | 2,301  |
| 225662_at    | ZAK          | 1,19  | 2,685  |
| 225829_at    | PDZD8        | 1,188 | 2,831  |
| 237408_at    | DCUN1D1      | 1,188 | 6,784  |
| 226352_at    | JMY          | 1,187 | 2,214  |
| 223240_at    | FBXO8        | 1,186 | 8,411  |
| 226278_at    | SVIP         | 1,186 | 3,707  |
| 231780_at    | GBGT1        | 1,186 | 5,604  |
| 209674_at    | CRY1         | 1,185 | 2,366  |
| 210578_at    | TRIM10       | 1,185 | 11,78  |
| 202236_s_at  | SLC16A1      | 1,184 | 2,548  |
| 1560068_a_at | LOC729870    | 1,183 | 11,033 |
| 222126_at    | AGFG2        | 1,183 | 6,248  |
| 212282_at    | TMEM97       | 1,181 | 3,607  |
| 213683_at    | ACSL6        | 1,181 | 7,564  |
| 212973_at    | RPIA         | 1,18  | 5,882  |
| 202874_s_at  | ATP6V1C1     | 1,179 | 4,403  |
| 209735_at    | ABCG2        | 1,179 | 4,055  |
| 228775_at    | EMC3         | 1,179 | 6,815  |
| 216956_s_at  | ITGA2B       | 1,178 | 2,302  |
| 224891_at    | FOXO3        | 1,178 | 4,112  |
| 226031_at    | VPS50        | 1,178 | 7,618  |
| 235983_at    |              | 1,178 | 5,014  |
| 1553015_a_at | RECQL4       | 1,176 | 4,481  |
| 216541_x_at  | IGHM///IGHG1 | 1,176 | 4,976  |
| 220937_s_at  | ST6GALNAC4   | 1,176 | 4,724  |
| 1554901_at   | GAFA1        | 1,175 | 2,801  |

Tabelle1

|              |                  |       |        |
|--------------|------------------|-------|--------|
| 201695_s_at  | PNP              | 1,174 | 4,312  |
| 203917_at    | CXADR            | 1,174 | 9,393  |
| 218583_s_at  | DCUN1D1          | 1,174 | 12,839 |
| 234059_at    |                  | 1,17  | 10,581 |
| 218208_at    | PQLC1            | 1,169 | 8,017  |
| 48808_at     | DHFR             | 1,169 | 3,518  |
| 204318_s_at  | GTSE1            | 1,167 | 3,66   |
| 33579_i_at   | GALR3            | 1,167 | 9,227  |
| 225140_at    | KLF3             | 1,166 | 4,675  |
| 242517_at    | KISS1R           | 1,165 | 10,388 |
| 228181_at    | SLC30A1          | 1,164 | 4,187  |
| 213520_at    | RECQL4           | 1,162 | 7,352  |
| 208632_at    | RNF10            | 1,161 | 3,853  |
| 242496_at    | ART4             | 1,161 | 24,065 |
| 202129_s_at  | RIOK3            | 1,16  | 3,046  |
| 232370_at    |                  | 1,16  | 6,563  |
| 224823_at    | MYLK             | 1,159 | 2,9    |
| 238756_at    | GAS2L3           | 1,159 | 4,901  |
| 218782_s_at  | ATAD2            | 1,157 | 4,553  |
| 228770_at    | GPR146           | 1,157 | 4,567  |
| 203118_at    | PCSK7            | 1,156 | 5,773  |
| 227615_at    | SRRD             | 1,154 | 5,704  |
| 214157_at    | GNAS             | 1,153 | 4,151  |
| 226957_x_at  | RALBP1           | 1,153 | 7,725  |
| 235296_at    | EIF5A2           | 1,153 | 15,301 |
| 205206_at    | ANOS1            | 1,152 | 4,445  |
| 231914_at    | NUDT14           | 1,151 | 3,736  |
| 201174_s_at  | TERF2IP          | 1,15  | 6,591  |
| 201834_at    | PRKAB1           | 1,15  | 5,734  |
| 36936_at     | TSTA3            | 1,15  | 7,263  |
| 206102_at    | GINS1            | 1,149 | 2,341  |
| 209372_x_at  | TUBB2B//TUBB2A   | 1,149 | 3,225  |
| 202237_at    | LOC101928916//NM | 1,146 | 4,051  |
| 1555426_a_at | OTUD5            | 1,145 | 4,871  |
| 240363_at    | ANK1             | 1,145 | 6,583  |
| 202500_at    | DNAJB2           | 1,142 | 3,855  |
| 209048_s_at  | ZMYND8           | 1,142 | 5,595  |
| 225319_s_at  | FAM104A          | 1,142 | 6,549  |
| 205095_s_at  | ATP6V0A1         | 1,141 | 3,346  |
| 218985_at    | SLC2A8           | 1,141 | 8,345  |
| 202059_s_at  | KPNA1            | 1,139 | 8      |
| 212230_at    | PLPP3            | 1,139 | 5,686  |
| 213899_at    | METAP2           | 1,139 | 4,941  |
| 223381_at    | NUF2             | 1,139 | 2,815  |
| 203096_s_at  | RAPGEF2          | 1,138 | 3,566  |
| 227231_at    | KIAA1211         | 1,137 | 2,574  |
| 225799_at    | LOC101930489//MI | 1,136 | 5,128  |
| 208900_s_at  | TOP1             | 1,135 | 5,947  |
| 222037_at    | MCM4             | 1,134 | 2,515  |
| 228378_at    | C12orf29         | 1,134 | 6,254  |
| 211812_s_at  | B3GALNT1         | 1,133 | 3,712  |
| 222884_at    | ZNF346           | 1,132 | 13,8   |
| 219257_s_at  | SPHK1            | 1,131 | 5,148  |
| 203815_at    | GSTT1            | 1,128 | 10,161 |
| 210438_x_at  | TROVE2           | 1,128 | 16,282 |
| 241298_x_at  |                  | 1,128 | 5,97   |
| 208079_s_at  | AURKA            | 1,127 | 2,949  |
| 219588_s_at  | NCAPG2           | 1,127 | 3,095  |
| 226118_at    | CENPO            | 1,127 | 5,486  |
| 1560031_at   | FRMD4A           | 1,126 | 3,538  |
| 205198_s_at  | ATP7A            | 1,126 | 8,439  |
| 220295_x_at  | DEPDC1           | 1,123 | 6,567  |
| 213007_at    | FANCI            | 1,122 | 3,295  |

Tabelle1

|              |              |       |        |
|--------------|--------------|-------|--------|
| 236402_at    | BRAF         | 1,122 | 7,378  |
| 213310_at    | CASC7///AGO2 | 1,121 | 4,764  |
| 218004_at    | BSDC1        | 1,121 | 11,166 |
| 219657_s_at  | KLF3         | 1,121 | 5,187  |
| 202403_s_at  | COL1A2       | 1,118 | 5,325  |
| 225478_at    | MFHAS1       | 1,117 | 4,601  |
| 205190_at    | PLS1         | 1,116 | 2,221  |
| 202886_s_at  | PPP2R1B      | 1,115 | 6,31   |
| 224947_at    | RNF26        | 1,115 | 6,696  |
| 230092_at    | UBXN10       | 1,115 | 5,685  |
| 213935_at    | ABHD5        | 1,112 | 5,223  |
| 222740_at    | ATAD2        | 1,112 | 3,751  |
| 1558322_a_at | PAQR9        | 1,11  | 7,514  |
| 208813_at    | GOT1         | 1,109 | 8,365  |
| 209507_at    | RPA3         | 1,109 | 2,787  |
| 222871_at    | KLHDC8A      | 1,109 | 11,494 |
| 223515_s_at  | COQ3         | 1,109 | 7,365  |
| 209345_s_at  | PI4K2A       | 1,108 | 4,797  |
| 213027_at    | TROVE2       | 1,108 | 7,686  |
| 242007_at    | FBXO30       | 1,108 | 34,08  |
| 39313_at     | WNK1         | 1,107 | 7,643  |
| 206772_at    | PTH2R        | 1,105 | 2,739  |
| 208255_s_at  | FKBP8        | 1,105 | 5,147  |
| 217908_s_at  | DCAF6        | 1,105 | 10,271 |
| 219763_at    | DENND1A      | 1,105 | 5,042  |
| 219862_s_at  | NARF         | 1,105 | 8,534  |
| 38158_at     | ESPL1        | 1,105 | 3,301  |
| 207765_s_at  | FAM214B      | 1,104 | 4,337  |
| 228654_at    | SPIN4        | 1,104 | 2,243  |
| 218692_at    | SYBU         | 1,103 | 14,77  |
| 223133_at    | TMEM14B      | 1,102 | 3,846  |
| 226666_at    | DAAM1        | 1,102 | 4,982  |
| 236957_at    | CDCA2        | 1,102 | 4,286  |
| 215118_s_at  | IGH          | 1,101 | 4,038  |
| 1561651_s_at | TAL1         | 1,1   | 3,584  |
| 203746_s_at  | HCCS         | 1,099 | 6,689  |
| 207813_s_at  | FDXR         | 1,099 | 5,07   |
| 216417_x_at  | HOXB9        | 1,099 | 3,05   |
| 220199_s_at  | AIDA         | 1,099 | 4,909  |
| 226120_at    | TTC8         | 1,098 | 3,549  |
| 218252_at    | CKAP2        | 1,097 | 4,18   |
| 202693_s_at  | STK17A       | 1,096 | 3,4    |
| 212256_at    | GALNT10      | 1,096 | 7,51   |
| 242459_at    |              | 1,096 | 9,514  |
| 213226_at    | CCNA2        | 1,094 | 3,074  |
| 223194_s_at  | SLC22A23     | 1,094 | 6,067  |
| 228559_at    | CENPN        | 1,094 | 4,125  |
| 201052_s_at  | PSMF1        | 1,093 | 5,743  |
| 208997_s_at  | UCP2         | 1,093 | 3,149  |
| 209535_s_at  |              | 1,093 | 5,152  |
| 202532_s_at  | DHFR         | 1,092 | 5,282  |
| 218466_at    | TBC1D17      | 1,092 | 5,02   |
| 1555068_at   | WNK1         | 1,09  | 6,124  |
| 202338_at    | TK1          | 1,09  | 4,295  |
| 202058_s_at  | KPNA1        | 1,089 | 11,427 |
| 203018_s_at  | SSX2IP       | 1,088 | 5,546  |
| 1560507_at   | AWAT1        | 1,087 | 11,148 |
| 221966_at    | GPR137       | 1,087 | 6,092  |
| 222679_s_at  | DCUN1D1      | 1,087 | 6,18   |
| 232349_x_at  | DCAF6        | 1,087 | 9,853  |
| 203968_s_at  | CDC6         | 1,086 | 4,813  |
| 204144_s_at  | PIGQ         | 1,084 | 7,989  |
| 242944_at    | FAM83A       | 1,084 | 8,298  |



Tabelle1

|              |                   |       |        |
|--------------|-------------------|-------|--------|
| 223307_at    | CDCA3             | 1,082 | 3,681  |
| 203432_at    | TMPO              | 1,081 | 4,081  |
| 213608_s_at  | SRRD              | 1,081 | 6,684  |
| 227569_at    | LNx2              | 1,081 | 3,696  |
| 230146_s_at  | NCS1              | 1,081 | 15,43  |
| 226638_at    | ARHGAP23          | 1,08  | 3,174  |
| 207871_s_at  | MIR6132///ST7-OT3 | 1,079 | 2,603  |
| 1570347_at   | MLX               | 1,078 | 3,542  |
| 206049_at    | SELP              | 1,078 | 2,298  |
| 226996_at    | LCLAT1            | 1,078 | 8,42   |
| 229994_at    | NFIA              | 1,078 | 5,778  |
| 200075_s_at  | GUK1              | 1,076 | 5,957  |
| 224461_s_at  | AIFM2             | 1,076 | 21,401 |
| 1568781_at   | UROS              | 1,075 | 7,429  |
| 201477_s_at  | RRM1              | 1,075 | 4,476  |
| 205024_s_at  | RAD51             | 1,075 | 2,413  |
| 222077_s_at  | RACGAP1           | 1,075 | 2,841  |
| 213331_s_at  | NEK1              | 1,074 | 4,733  |
| 230285_at    | SVIP              | 1,074 | 2,944  |
| 1569024_at   | FAM13A            | 1,07  | 4,495  |
| 202240_at    | PLK1              | 1,07  | 2,972  |
| 207173_x_at  | CDH11             | 1,069 | 7,315  |
| 202533_s_at  | DHFR              | 1,068 | 4,138  |
| 235476_at    | TRIM59///IFT80    | 1,066 | 3,261  |
| 218756_s_at  | DHRS11            | 1,065 | 2,364  |
| 204237_at    | GULP1             | 1,063 | 20,783 |
| 232109_at    | UBXN10            | 1,062 | 5,515  |
| 235588_at    | ESCO2             | 1,062 | 11,896 |
| 212407_at    | METTL13           | 1,06  | 4,13   |
| 222682_s_at  | FAM114A2          | 1,06  | 6,886  |
| 206196_s_at  | RUNDC3A           | 1,059 | 2,232  |
| 223805_at    | OSBPL6            | 1,059 | 12,088 |
| 238177_at    | SLC6A19           | 1,059 | 3,607  |
| 212914_at    | CBX7              | 1,058 | 3,205  |
| 234992_x_at  | ECT2              | 1,058 | 8,826  |
| 396_f_at     | EPOR              | 1,058 | 5,048  |
| 202154_x_at  | TUBB3             | 1,057 | 3,768  |
| 204901_at    | BTRC              | 1,057 | 10,172 |
| 207469_s_at  | PIR               | 1,057 | 10,198 |
| 1555754_s_at | ATN1              | 1,056 | 2,854  |
| 233010_at    |                   | 1,055 | 5,419  |
| 218755_at    | KIF20A            | 1,053 | 2,308  |
| 224471_s_at  | BTRC              | 1,053 | 4,331  |
| 216060_s_at  | DAAM1             | 1,051 | 4,049  |
| 1552280_at   | TIMD4             | 1,05  | 10,97  |
| 222482_at    | SSBP3             | 1,05  | 4,09   |
| 201701_s_at  | PGRMC2            | 1,049 | 6,245  |
| 211519_s_at  | KIF2C             | 1,048 | 5,062  |
| 205377_s_at  | ACHE              | 1,046 | 14,048 |
| 208868_s_at  | GABARAPL1         | 1,045 | 2,708  |
| 210907_s_at  | PDCD10            | 1,045 | 6,972  |
| 237194_at    |                   | 1,045 | 12,961 |
| 207045_at    | VPS50             | 1,044 | 22,11  |
| 218450_at    | HEBP1             | 1,044 | 4,206  |
| 218982_s_at  | MRPS17            | 1,044 | 7,392  |
| 1555826_at   | BIRC5             | 1,043 | 4,344  |
| 205565_s_at  | FXN               | 1,043 | 5,623  |
| 226363_at    | ABCC5             | 1,043 | 4,579  |
| 220757_s_at  | MIR4746///UBXN6   | 1,042 | 4,336  |
| 224476_s_at  | MESP1             | 1,04  | 4,972  |
| 229548_at    |                   | 1,04  | 3,581  |
| 203811_s_at  | DNAJB4            | 1,038 | 4,991  |
| 224753_at    | CDCA5             | 1,037 | 2,506  |

Tabelle1

|             |                  |       |        |
|-------------|------------------|-------|--------|
| 244786_at   | SCARNA13///SNHG  | 1,036 | 9,86   |
| 208398_s_at | TBPL1            | 1,035 | 7,936  |
| 208916_at   | SLC1A5           | 1,035 | 5,455  |
| 211354_s_at | LEPROT///LEPR    | 1,035 | 9,36   |
| 231869_at   | KIAA1586         | 1,035 | 4,696  |
| 212884_x_at | APOE             | 1,034 | 5,282  |
| 46270_at    | UBAP1            | 1,034 | 6,619  |
| 202083_s_at | SEC14L1          | 1,033 | 3,596  |
| 204887_s_at | PLK4             | 1,033 | 3,237  |
| 219476_at   | C1orf116         | 1,033 | 34,178 |
| 227669_at   | MPC2             | 1,033 | 4,899  |
| 234792_x_at | IGHV4-31///IGHA1 | 1,033 | 2,867  |
| 210681_s_at | MIR6125///USP15  | 1,032 | 5,113  |
| 223085_at   | RNF19A           | 1,032 | 5,61   |
| 227366_at   | RILP             | 1,032 | 5,646  |
| 219956_at   | GALNT6           | 1,031 | 4,61   |
| 204817_at   | ESPL1            | 1,03  | 3,077  |
| 208869_s_at | GABARAPL1        | 1,029 | 2,581  |
| 206074_s_at | HMGA1            | 1,028 | 4,311  |
| 204128_s_at | RFC3             | 1,027 | 4,252  |
| 218126_at   | RMDN3            | 1,027 | 12,005 |
| 235709_at   | GAS2L3           | 1,027 | 3,302  |
| 203609_s_at | ALDH5A1          | 1,026 | 4,145  |
| 209475_at   | MIR6125///USP15  | 1,026 | 5,69   |
| 214583_at   | DDI2///RSC1A1    | 1,026 | 5,171  |
| 226767_s_at | FAHD1            | 1,026 | 4,959  |
| 1557008_at  | LOC340107        | 1,025 | 3,432  |
| 212852_s_at | TROVE2           | 1,025 | 18,336 |
| 223666_at   | SNX5             | 1,025 | 2,827  |
| 205126_at   | VRK2             | 1,023 | 8,819  |
| 218205_s_at | MKNK2            | 1,022 | 4,748  |
| 212739_s_at | NME4             | 1,021 | 4,461  |
| 219555_s_at | CENPN            | 1,021 | 2,962  |
| 202198_s_at | MTMR3            | 1,02  | 5,004  |
| 204775_at   | CHAF1B           | 1,019 | 3,717  |
| 219929_s_at | ZFYVE21          | 1,018 | 6,816  |
| 227960_s_at | FAHD1            | 1,017 | 5,427  |
| 228069_at   | MTFR2            | 1,017 | 3,473  |
| 235582_at   | E2F2             | 1,017 | 5,442  |
| 201285_at   | MKRN1            | 1,016 | 3,277  |
| 212540_at   | CDC34            | 1,016 | 4,176  |
| 201835_s_at | PRKAB1           | 1,015 | 8,849  |
| 205339_at   | STIL             | 1,015 | 4,375  |
| 222962_s_at | MCM10            | 1,014 | 2,95   |
| 231938_at   | SGO1             | 1,013 | 8,613  |
| 206571_s_at | MAP4K4           | 1,012 | 3,651  |
| 215992_s_at | RAPGEF2          | 1,012 | 3,175  |
| 218952_at   | PCSK1N           | 1,012 | 5,186  |
| 224799_at   | NDFIP2           | 1,012 | 3,038  |
| 218141_at   | UBE2O            | 1,011 | 2,825  |
| 201663_s_at | SMC4             | 1,01  | 2,227  |
| 236760_at   | AMMECR1          | 1,01  | 9,153  |
| 201886_at   | DCAF11           | 1,009 | 8,685  |
| 205392_s_at | CCL15-CCL14///CC | 1,009 | 4,557  |
| 219458_s_at | NSUN3            | 1,009 | 6,403  |
| 227386_s_at | TMEM200B         | 1,007 | 5,219  |
| 231422_x_at | TYSND1           | 1,007 | 8,006  |
| 203114_at   | SSSCA1           | 1,004 | 5,442  |
| 213327_s_at | USP12            | 1,004 | 5,089  |
| 233571_x_at | PPDPF            | 1,004 | 4,201  |
| 212839_s_at | TROVE2           | 1,003 | 9,264  |
| 223093_at   | ANKH             | 1,002 | 2,709  |
| 231983_at   | IBA57            | 1,002 | 6,549  |

Tabelle1

|              |                |       |        |
|--------------|----------------|-------|--------|
| 1553138_a_at | ANKLE1         | 1,001 | 2,526  |
| 202248_at    | E2F4           | 1,001 | 6,999  |
| 208977_x_at  | TUBB4B         | 1,001 | 4,122  |
| 241433_at    | RCOR3          | 1,001 | 10,449 |
| 213499_at    | CLCN2          | 0,998 | 6,865  |
| 228033_at    | E2F7           | 0,998 | 3,562  |
| 231772_x_at  | CENPH          | 0,998 | 3,137  |
| 223241_at    | MIR6836///SNX8 | 0,997 | 4,679  |
| 228031_at    | TTPAL          | 0,997 | 4,463  |
| 208511_at    | PTTG3P         | 0,996 | 4,115  |
| 210868_s_at  | ELOVL6         | 0,996 | 3,134  |
| 218262_at    | RMND5B         | 0,995 | 3,277  |
| 209100_at    | IFRD2          | 0,994 | 5,881  |
| 215218_s_at  | WDR62          | 0,993 | 4,336  |
| 205034_at    | CCNE2          | 0,991 | 2,852  |
| 209075_s_at  | ISCU           | 0,991 | 6,184  |
| 221538_s_at  | PLXNA1         | 0,991 | 9,553  |
| 239791_at    | HOXB-AS3       | 0,991 | 2,257  |
| 204695_at    | CDC25A         | 0,989 | 4,675  |
| 210534_s_at  | B9D1           | 0,989 | 25,543 |
| 201744_s_at  | LUM            | 0,988 | 4,477  |
| 203827_at    | WIP1           | 0,988 | 3,049  |
| 232765_x_at  | SLC22A31       | 0,988 | 2,633  |
| 201006_at    | PRDX2          | 0,986 | 8,665  |
| 215886_x_at  | USP12          | 0,986 | 4,297  |
| 238622_at    | RAP2B          | 0,985 | 7,393  |
| 203020_at    | RABGAP1L       | 0,984 | 4,316  |
| 218588_s_at  | FAM114A2       | 0,983 | 7,813  |
| 223285_s_at  | ST6GALNAC4     | 0,981 | 3,265  |
| 226928_x_at  | SLC25A37       | 0,981 | 3,265  |
| 1552680_a_at | KNL1           | 0,98  | 3,34   |
| 1561038_at   | ZNF81          | 0,98  | 3,341  |
| 204710_s_at  | WIP1           | 0,98  | 9,154  |
| 204240_s_at  | SMC2           | 0,979 | 3,363  |
| 222432_s_at  | CCDC47         | 0,979 | 8,738  |
| 242055_at    | PSMG4          | 0,978 | 6,477  |
| 210844_x_at  | CTNNA1         | 0,977 | 2,251  |
| 227801_at    | TRIM59         | 0,976 | 3,389  |
| 209861_s_at  | METAP2         | 0,975 | 7,068  |
| 201796_s_at  | VAR5           | 0,974 | 3,655  |
| 213836_s_at  | WIP1           | 0,973 | 3,189  |
| 204126_s_at  | CDC45          | 0,972 | 2,614  |
| 206654_s_at  | POLR3G         | 0,972 | 2,68   |
| 228148_at    | ZNF584         | 0,972 | 9,007  |
| 203046_s_at  | TIMELESS       | 0,97  | 2,981  |
| 217399_s_at  | FOXO3B///FOXO3 | 0,97  | 3,918  |
| 231880_at    | STRIP2         | 0,97  | 20,795 |
| 1554260_a_at | FRYL           | 0,968 | 7,286  |
| 205854_at    | TULP3          | 0,968 | 7,124  |
| 238825_at    | ACRC           | 0,968 | 5,851  |
| 217516_x_at  | ARVCF          | 0,967 | 4,052  |
| 226464_at    | C3orf58        | 0,967 | 3,976  |
| 208074_s_at  | AP2S1          | 0,966 | 5,924  |
| 211433_x_at  | FAM214B        | 0,966 | 5,913  |
| 1553338_at   | SDE2           | 0,965 | 3,502  |
| 228597_at    | MIS18A         | 0,965 | 3,579  |
| 241667_x_at  |                | 0,964 | 2,46   |
| 207246_at    | ZFY            | 0,963 | 3,186  |
| 210130_s_at  | TM7SF2         | 0,963 | 4,132  |
| 201476_s_at  | RRM1           | 0,962 | 4,334  |
| 241948_at    |                | 0,962 | 4,277  |
| 202568_s_at  | MARK3          | 0,961 | 8,326  |
| 228618_at    | PEAR1          | 0,961 | 2,509  |

Tabelle1

|              |                   |       |        |
|--------------|-------------------|-------|--------|
| 207300_s_at  | F7                | 0,96  | 3,523  |
| 221983_at    | FAM134A           | 0,96  | 6,319  |
| 228143_at    | CP                | 0,96  | 6,295  |
| 1555330_at   | GCLC              | 0,959 | 5,593  |
| 1553810_a_at | KIAA1524          | 0,958 | 6,703  |
| 208785_s_at  | MAP1LC3B          | 0,958 | 4,271  |
| 212405_s_at  | METTL13           | 0,958 | 3,593  |
| 231861_at    | LRP10             | 0,958 | 4,265  |
| 210692_s_at  | SLC43A3           | 0,957 | 3,616  |
| 214869_x_at  | GAPVD1            | 0,957 | 9,625  |
| 49077_at     | PPME1             | 0,957 | 9,412  |
| 219961_s_at  | KIZ               | 0,956 | 2,402  |
| 228063_s_at  | NAP1L5            | 0,955 | 2,9    |
| 238613_at    | ZAK               | 0,955 | 5,431  |
| 204744_s_at  | IARS              | 0,954 | 5,236  |
| 209826_at    | PPT2-EGFL8///EGF  | 0,954 | 2,438  |
| 210263_at    | KCNF1             | 0,954 | 3,967  |
| 220060_s_at  | PARPBP            | 0,954 | 4,231  |
| 239002_at    | ASPM              | 0,954 | 3,563  |
| 216022_at    |                   | 0,953 | 3,038  |
| 223978_s_at  | CRLS1             | 0,953 | 6,857  |
| 234307_s_at  | KIF26A            | 0,953 | 2,564  |
| 201155_s_at  | MFN2              | 0,952 | 7,373  |
| 218064_s_at  | AKAP8L            | 0,951 | 8,857  |
| 218671_s_at  | ATPIF1            | 0,951 | 6,089  |
| 219247_s_at  | ZDHHC14           | 0,949 | 2,773  |
| 213568_at    | OSR2              | 0,948 | 4,427  |
| 204023_at    | RFC4              | 0,947 | 3,623  |
| 228401_at    | ATAD2             | 0,947 | 3,123  |
| 200642_at    | SOD1              | 0,946 | 5,043  |
| 201893_x_at  | DCN               | 0,946 | 3,948  |
| 223463_at    | RAB23             | 0,946 | 7,747  |
| 227561_at    | DDR2              | 0,946 | 3,367  |
| 235387_at    | GSTCD             | 0,946 | 4,216  |
| 200790_at    | ODC1              | 0,945 | 3,733  |
| 204235_s_at  | GULP1             | 0,945 | 18,598 |
| 212219_at    | PSME4             | 0,944 | 5,1    |
| 1560782_at   |                   | 0,943 | 4,069  |
| 207389_at    | GP1BA             | 0,943 | 3,807  |
| 221227_x_at  | COQ3              | 0,943 | 7,131  |
| 223180_s_at  | TIMM21            | 0,943 | 4,12   |
| 223404_s_at  | TRMT1L            | 0,943 | 2,44   |
| 237855_at    | ZNF777            | 0,943 | 4,717  |
| 1552651_a_at | RAD51L3-RFFL///RI | 0,941 | 5,024  |
| 238929_at    | SRSF8             | 0,941 | 2,863  |
| 219411_at    | ELMO3             | 0,938 | 6,379  |
| 230021_at    | TICRR             | 0,938 | 3,592  |
| 221777_at    | RITA1             | 0,937 | 2,464  |
| 213934_s_at  | ZNF23             | 0,936 | 3,011  |
| 208901_s_at  | TOP1              | 0,935 | 7,083  |
| 224715_at    | WDR34             | 0,935 | 3,781  |
| 232785_at    | RGAG1             | 0,935 | 4,711  |
| 212020_s_at  | MKI67             | 0,934 | 2,245  |
| 223105_s_at  | TMEM14B//TMEM1    | 0,934 | 4,556  |
| 223700_at    | MND1              | 0,934 | 3,142  |
| 1555225_at   | C1orf43           | 0,933 | 8,557  |
| 229603_at    | BBS12             | 0,932 | 7,093  |
| 230599_at    |                   | 0,932 | 3,132  |
| 212555_at    | PRKAR1B           | 0,93  | 2,493  |
| 204970_s_at  | MAFG              | 0,927 | 2,474  |
| 209002_s_at  | CALCOCO1          | 0,927 | 8,623  |
| 37966_at     | PARVB             | 0,927 | 3,237  |
| 202875_s_at  | PBX2              | 0,925 | 3,507  |

Tabelle1

|              |                 |       |        |
|--------------|-----------------|-------|--------|
| 204267_x_at  | PKMYT1          | 0,925 | 4,72   |
| 206333_at    | MSI1            | 0,925 | 5,325  |
| 220746_s_at  | UIMC1           | 0,925 | 7,509  |
| 221964_at    | TULP3           | 0,925 | 8,842  |
| 204768_s_at  | FEN1            | 0,924 | 3,179  |
| 213599_at    | OIP5            | 0,924 | 2,802  |
| 219311_at    | CEP76           | 0,924 | 5,158  |
| 220094_s_at  | MCUR1           | 0,924 | 5,925  |
| 200896_x_at  | HDGF            | 0,922 | 6,429  |
| 212342_at    | YIPF6           | 0,921 | 7,787  |
| 223471_at    | RAB3IP          | 0,921 | 2,945  |
| 211423_s_at  | SC5D            | 0,92  | 3,83   |
| 223035_s_at  | FARSB           | 0,92  | 3,24   |
| 238092_at    | LRFN4           | 0,92  | 2,346  |
| 240455_at    |                 | 0,919 | 5,212  |
| 1559094_at   | FBXO9           | 0,918 | 3,84   |
| 200070_at    | CNPPD1          | 0,918 | 6,5    |
| 218813_s_at  | SH3GLB2         | 0,918 | 3,762  |
| 225972_at    | TMEM64          | 0,916 | 3,213  |
| 242957_at    | VWCE            | 0,916 | 4,068  |
| 213595_s_at  | CDC42BPA        | 0,915 | 5,206  |
| 243424_at    |                 | 0,915 | 8,636  |
| 41657_at     | STK11           | 0,915 | 8,877  |
| 1554217_a_at | VPS50           | 0,914 | 15,155 |
| 200614_at    | CLTC            | 0,914 | 9,721  |
| 243252_at    |                 | 0,914 | 3,137  |
| 204317_at    | TRMU///GTSE1    | 0,913 | 4,967  |
| 1559096_x_at | FBXO9           | 0,912 | 3,801  |
| 203601_s_at  | ZBTB17          | 0,912 | 3,948  |
| 224791_at    | ASAP1           | 0,912 | 2,221  |
| 227713_at    | KATNAL1         | 0,912 | 4,071  |
| 234846_at    | LOC100130370    | 0,912 | 5,006  |
| 213253_at    | SMC2            | 0,911 | 2,38   |
| 218162_at    | OLFML3          | 0,911 | 3,972  |
| 231715_s_at  | MIR6741///PYCR2 | 0,911 | 5,325  |
| 206976_s_at  | HSPH1           | 0,91  | 3,102  |
| 219433_at    | BCOR            | 0,91  | 4,132  |
| 1555580_at   | LINC00824       | 0,909 | 2,881  |
| 1555627_s_at | LINC01547       | 0,909 | 3,752  |
| 204033_at    | TRIP13          | 0,909 | 3,569  |
| 220018_at    | CBLL1           | 0,909 | 3,101  |
| 231038_s_at  |                 | 0,909 | 2,437  |
| 1554429_a_at | DMWD            | 0,907 | 4,129  |
| 202815_s_at  | HEXIM1          | 0,907 | 3,071  |
| 219000_s_at  | DSCC1           | 0,907 | 2,553  |
| 221677_s_at  | DONSON          | 0,907 | 4,791  |
| 221764_at    | R3HDM4          | 0,907 | 2,814  |
| 1552682_a_at | KNL1            | 0,906 | 5,022  |
| 222393_s_at  | NAA50           | 0,906 | 6,894  |
| 230906_at    | GALNT10         | 0,906 | 4,552  |
| 202534_x_at  | DHFR            | 0,905 | 2,373  |
| 213300_at    | ATG2A           | 0,904 | 7,265  |
| 224178_s_at  | SOX6            | 0,904 | 26,388 |
| 202972_s_at  | FAM13A          | 0,903 | 3,546  |
| 212829_at    | PIP4K2A         | 0,903 | 3,633  |
| 237207_at    |                 | 0,903 | 26,311 |
| 200612_s_at  | AP2B1           | 0,901 | 4,399  |
| 204121_at    | GADD45G         | 0,901 | 19,598 |
| 212557_at    | ZNF451          | 0,901 | 7,813  |
| 217626_at    | AKR1C1          | 0,901 | 4,197  |
| 212340_at    | YIPF6           | 0,9   | 5,604  |
| 214987_at    | GAB1            | 0,9   | 6,656  |
| 1556283_s_at | FGFR1OP2        | 0,897 | 3,861  |

Tabelle1

|              |                 |       |        |
|--------------|-----------------|-------|--------|
| 213741_s_at  | KPNA1           | 0,897 | 8,782  |
| 241300_at    |                 | 0,897 | 5,99   |
| 241478_at    | MICALL2         | 0,897 | 6,551  |
| 202031_s_at  | WIPI2           | 0,896 | 7,362  |
| 212441_at    | KIAA0232        | 0,896 | 6,888  |
| 217757_at    | A2M             | 0,896 | 4,323  |
| 1559439_s_at | C21orf58        | 0,895 | 6,669  |
| 209715_at    | CBX5            | 0,895 | 2,803  |
| 1557165_s_at | KLHL18          | 0,893 | 4,29   |
| 222581_at    | XPR1            | 0,893 | 4,536  |
| 211410_x_at  | KIR2DL5A        | 0,892 | 2,384  |
| 217730_at    | MIR6513//TMBIM1 | 0,892 | 2,891  |
| 218037_at    | FAM134A         | 0,891 | 6,551  |
| 229979_x_at  |                 | 0,891 | 8,981  |
| 1552927_at   | TAB3            | 0,89  | 3,591  |
| 218115_at    | ASF1B           | 0,89  | 2,477  |
| 209053_s_at  | WHSC1           | 0,889 | 3,073  |
| 218875_s_at  | FBXO5           | 0,889 | 2,281  |
| 209046_s_at  | GABARAPL2       | 0,888 | 2,884  |
| 226161_at    | SLC30A6         | 0,888 | 3,319  |
| 203019_x_at  | SSX2IP          | 0,887 | 6,245  |
| 209217_s_at  | WDR45           | 0,887 | 7,346  |
| 220336_s_at  | GP6             | 0,887 | 3,983  |
| 203966_s_at  | PPM1A           | 0,886 | 3,116  |
| 212383_at    | ATP6V0A1        | 0,886 | 3,912  |
| 235572_at    | SPC24           | 0,886 | 3,315  |
| 201212_at    | LGMN            | 0,885 | 2,505  |
| 223106_at    | TMEM14C         | 0,885 | 2,445  |
| 230942_at    | CMTM5           | 0,885 | 3,095  |
| 204238_s_at  | DNPH1           | 0,884 | 2,202  |
| 215594_at    | ERV9-1          | 0,883 | 2,981  |
| 216228_s_at  | WDHD1           | 0,883 | 3,725  |
| 203308_x_at  | HPS1            | 0,882 | 6,139  |
| 218297_at    | FAM188A         | 0,882 | 3,585  |
| 240274_at    |                 | 0,882 | 5,263  |
| 202983_at    | HLTF            | 0,881 | 3,533  |
| 208247_at    | ERC2-IT1        | 0,881 | 5,233  |
| 209832_s_at  | CDT1            | 0,881 | 2,472  |
| 1565065_at   | OFCC1           | 0,88  | 3,618  |
| 216389_s_at  | DCAF11          | 0,88  | 7,294  |
| 205597_at    | SLC44A4         | 0,879 | 13,447 |
| 231250_at    | LOC101060400    | 0,879 | 3,26   |
| 1555772_a_at | CDC25A          | 0,878 | 2,652  |
| 213726_x_at  | TUBB4B          | 0,878 | 3,706  |
| 224988_at    | C6orf89         | 0,878 | 7,86   |
| 225644_at    | CCDC117         | 0,878 | 5,469  |
| 228079_at    | C3orf58         | 0,878 | 7,894  |
| 231827_at    |                 | 0,878 | 7,218  |
| 241985_at    | JMY             | 0,878 | 2,395  |
| 1563805_a_at | FAM83C          | 0,877 | 6,255  |
| 226921_at    | UBR1            | 0,877 | 5,972  |
| 226356_at    | MIGA2           | 0,876 | 6,272  |
| 231895_at    | SASS6           | 0,876 | 5,384  |
| 217683_at    | HBE1            | 0,875 | 6,038  |
| 232862_at    | ABHD5           | 0,875 | 7,277  |
| 238528_at    | UBR1            | 0,875 | 5,201  |
| 214804_at    | CENPI           | 0,874 | 6,324  |
| 217270_s_at  | DYRK1B          | 0,873 | 4,094  |
| 208955_at    | DUT             | 0,872 | 4,144  |
| 217924_at    | C6orf106        | 0,872 | 4,028  |
| 221452_s_at  | TMEM14B         | 0,872 | 3,758  |
| 209804_at    | DCLRE1A         | 0,871 | 4,614  |
| 1552669_at   | PPP1R3B         | 0,87  | 3,49   |

Tabelle1

|              |              |       |        |
|--------------|--------------|-------|--------|
| 202695_s_at  | STK17A       | 0,87  | 4,247  |
| 203980_at    | FABP4        | 0,87  | 5,726  |
| 214247_s_at  | DKK3         | 0,87  | 5,314  |
| 244138_at    | LOC101929154 | 0,87  | 3,886  |
| 1558960_a_at | MFGE8        | 0,869 | 3,352  |
| 203745_at    | HCCS         | 0,869 | 5,095  |
| 204886_at    | PLK4         | 0,869 | 2,22   |
| 219577_s_at  | ABCA7        | 0,869 | 3,662  |
| 212115_at    | HN1L         | 0,868 | 2,857  |
| 1555501_s_at | RSRC1        | 0,867 | 5,134  |
| 202032_s_at  | MAN2A2       | 0,867 | 4,982  |
| 244461_at    | SPECC1       | 0,867 | 3,167  |
| 206669_at    | GAD1         | 0,866 | 7,976  |
| 201438_at    | COL6A3       | 0,865 | 5,716  |
| 208476_s_at  | FRMD4A       | 0,865 | 4,237  |
| 208898_at    | ATP6V1D      | 0,865 | 4,014  |
| 212341_at    | YIPF6        | 0,865 | 5,8    |
| 219331_s_at  | KLHDC8A      | 0,865 | 7,775  |
| 226009_at    | DPCD         | 0,865 | 5,017  |
| 230165_at    | SGO2         | 0,865 | 2,833  |
| 202814_s_at  | HEXIM1       | 0,863 | 3,299  |
| 206315_at    | CRLF1        | 0,863 | 8,05   |
| 205086_s_at  | NCAPH2       | 0,862 | 3,383  |
| 211896_s_at  | DCN          | 0,862 | 15,737 |
| 215353_at    | GIMAP5       | 0,862 | 3,092  |
| 228900_at    | SPECC1       | 0,862 | 14,1   |
| 209726_at    | CA11         | 0,861 | 3,513  |
| 237604_at    |              | 0,861 | 3,087  |
| 1554486_a_at | GFOD1        | 0,86  | 2,856  |
| 206366_x_at  | XCL1         | 0,86  | 3,869  |
| 242538_at    |              | 0,86  | 4,873  |
| 220854_at    |              | 0,858 | 4,119  |
| 222093_s_at  | INO80B       | 0,858 | 3,408  |
| 227928_at    | PARPBP       | 0,858 | 5,783  |
| 235089_at    | FBXL20       | 0,858 | 7,314  |
| 204558_at    | RAD54L       | 0,857 | 2,816  |
| 204724_s_at  | COL9A3       | 0,857 | 6,865  |
| 1561609_at   | MIR548XHG    | 0,856 | 5,792  |
| 207931_s_at  | PFKFB2       | 0,856 | 5,002  |
| 212955_s_at  | POLR2I       | 0,856 | 4,736  |
| 215535_s_at  | AGPAT1       | 0,856 | 8,585  |
| 1557186_s_at | TPCN1        | 0,855 | 2,978  |
| 205677_s_at  | DLEU1        | 0,855 | 3,097  |
| 209049_s_at  | ZMYND8       | 0,855 | 2,614  |
| 209380_s_at  | ABCC5        | 0,855 | 7,495  |
| 227408_s_at  | SNX25        | 0,855 | 3,634  |
| 227901_at    | LOC648987    | 0,855 | 2,488  |
| 234669_x_at  | EMSY         | 0,855 | 3,846  |
| 236847_at    | C19orf18     | 0,855 | 3,691  |
| 238164_at    | USP6NL       | 0,855 | 3,85   |
| 219046_s_at  | PKNOX2       | 0,854 | 5,221  |
| 213869_x_at  | THY1         | 0,853 | 9,394  |
| 223250_at    | KLHL7        | 0,853 | 4,959  |
| 226327_at    | ZNF507       | 0,853 | 3,04   |
| 229336_at    | ST3GAL2      | 0,853 | 5,058  |
| 200931_s_at  | VCL          | 0,852 | 2,546  |
| 221083_at    | KCNQ4        | 0,852 | 4,708  |
| 227092_at    | LOC101927752 | 0,852 | 2,662  |
| 228257_at    | ANKRD52      | 0,852 | 3,132  |
| 202290_at    | PDAP1        | 0,851 | 6,603  |
| 208943_s_at  | SEC62        | 0,851 | 5,338  |
| 226041_at    | NAPEPLD      | 0,85  | 2,879  |
| 222118_at    | CENPN        | 0,849 | 5,578  |

Tabelle1

|              |                   |       |        |
|--------------|-------------------|-------|--------|
| 224683_at    | FBXO18            | 0,849 | 6,3    |
| 1552928_s_at | TAB3              | 0,848 | 4,061  |
| 206815_at    | SPAG8             | 0,848 | 3,773  |
| 226374_at    | CXADR             | 0,848 | 25,702 |
| 1568649_at   | LOC105370943      | 0,847 | 5,079  |
| 212155_at    | RNF187            | 0,847 | 7,07   |
| 212343_at    | YIPF6             | 0,847 | 3,083  |
| 217468_at    | CYP2D6            | 0,847 | 3,745  |
| 219203_at    | EMC9              | 0,847 | 4,527  |
| 201335_s_at  | ARHGEF12          | 0,846 | 9,916  |
| 202448_s_at  | ZER1              | 0,845 | 3,716  |
| 204492_at    | ARHGAP11A         | 0,845 | 5,5    |
| 209972_s_at  | AIMP2             | 0,845 | 6,107  |
| 216008_s_at  | ARIH2             | 0,845 | 3,194  |
| 223548_at    | SWT1              | 0,845 | 3,529  |
| 229890_at    | LOC100507547///PF | 0,843 | 2,962  |
| 225121_at    | TBC1D23           | 0,842 | 6,189  |
| 237765_at    | SLC25A47          | 0,842 | 3,021  |
| 236964_at    |                   | 0,841 | 3,316  |
| 205728_at    | TENM1             | 0,84  | 18,278 |
| 219843_at    | IPP               | 0,84  | 6,078  |
| 1568596_a_at | TROAP             | 0,839 | 4,265  |
| 203478_at    | NDUFC1            | 0,839 | 2,408  |
| 208469_s_at  | PPT2-EGFL8///EGF  | 0,839 | 3,058  |
| 219187_at    | FKBPL             | 0,839 | 3,614  |
| 224330_s_at  | MRPL27            | 0,838 | 3,043  |
| 215505_s_at  | STRN3             | 0,837 | 3,571  |
| 35160_at     | LDB1              | 0,837 | 4,596  |
| 207042_at    | E2F2              | 0,836 | 3,692  |
| 219170_at    | FSD1              | 0,836 | 5,022  |
| 219544_at    | BORA              | 0,836 | 5,293  |
| 234863_x_at  | FBXO5             | 0,836 | 2,517  |
| 202883_s_at  | PPP2R1B           | 0,835 | 5,474  |
| 203775_at    | SLC25A13          | 0,835 | 5,039  |
| 216484_x_at  |                   | 0,835 | 5,115  |
| 242761_s_at  | ZNF420            | 0,835 | 3,665  |
| 201971_s_at  | ATP6V1A           | 0,834 | 2,818  |
| 223339_at    | ATPIF1            | 0,834 | 3,512  |
| 243510_at    |                   | 0,834 | 3,066  |
| 218010_x_at  | PPDPF             | 0,833 | 2,732  |
| 1555281_x_at | ARMC8             | 0,832 | 2,966  |
| 202427_s_at  | MPC2              | 0,832 | 4,552  |
| 208067_x_at  | UTY               | 0,832 | 2,731  |
| 236658_at    | RPS6KA2-AS1       | 0,832 | 4,069  |
| 238226_at    | TMEM255B          | 0,832 | 3,475  |
| 223635_s_at  | SSBP3             | 0,831 | 3,287  |
| 225346_at    | MTERF2            | 0,831 | 3,306  |
| 235178_x_at  | ESCO2             | 0,831 | 12,008 |
| 1556607_at   | EHD4              | 0,83  | 4,775  |
| 203544_s_at  | STAM              | 0,829 | 2,331  |
| 208619_at    | DDB1              | 0,829 | 5,516  |
| 221529_s_at  | PLVAP             | 0,829 | 2,899  |
| 225075_at    | PDRG1             | 0,829 | 4,336  |
| 241387_at    |                   | 0,829 | 2,37   |
| 241813_at    | MBD1              | 0,829 | 4,958  |
| 212142_at    | MCM4              | 0,828 | 2,748  |
| 222343_at    | BCL2L11           | 0,828 | 2,818  |
| 222913_at    | KLF3              | 0,828 | 3,483  |
| 210134_x_at  | SHOX2             | 0,827 | 5,475  |
| 213113_s_at  | SLC43A3           | 0,827 | 4,151  |
| 220511_s_at  | DLC1              | 0,827 | 5,328  |
| 224855_at    | MIR6741///PYCR2   | 0,827 | 4,8    |
| 217413_s_at  | TNXB              | 0,826 | 3,718  |



Tabelle1

|              |                   |       |        |
|--------------|-------------------|-------|--------|
| 224977_at    | C6orf89           | 0,826 | 4,894  |
| 43934_at     | GPR137            | 0,826 | 5,918  |
| 205687_at    | UBFD1             | 0,825 | 4,926  |
| 243382_at    | LOC101928647      | 0,825 | 5,164  |
| 201912_s_at  | GSPT1             | 0,824 | 2,36   |
| 207370_at    | IBSP              | 0,824 | 2,182  |
| 213365_at    | ERI2              | 0,824 | 3,507  |
| 226637_at    | UBE2H             | 0,824 | 3,254  |
| 230327_at    | LOC730098         | 0,824 | 7,293  |
| 1555304_a_at | KCNH5             | 0,823 | 5,486  |
| 1555659_a_at | TREML1            | 0,823 | 2,981  |
| 201384_s_at  | NBR1              | 0,823 | 3,467  |
| 212648_at    | DHX29             | 0,823 | 8,161  |
| 218564_at    | RFWD3             | 0,823 | 4,743  |
| 231872_at    | LRRCC1            | 0,823 | 2,78   |
| 209922_at    | BRAP              | 0,822 | 6,038  |
| 202731_at    | MIR4680///PDCD4   | 0,821 | 4,43   |
| 209572_s_at  | EED               | 0,821 | 4,434  |
| 236275_at    | KRBA1             | 0,821 | 2,698  |
| 1568639_a_at | GATA2-AS1         | 0,82  | 3,648  |
| 208221_s_at  | SLIT1             | 0,82  | 5,453  |
| 218305_at    | IPO4              | 0,82  | 3,363  |
| 235292_at    | FLJ32255          | 0,82  | 2,238  |
| 1559375_s_at |                   | 0,819 | 4,983  |
| 202590_s_at  | PDK2              | 0,819 | 4,079  |
| 204252_at    | CDK2              | 0,819 | 5,006  |
| 225729_at    | C6orf89           | 0,819 | 5,672  |
| 1558890_at   |                   | 0,818 | 2,938  |
| 202377_at    | LEPROT            | 0,818 | 4,144  |
| 203303_at    | DYNLT3            | 0,817 | 2,816  |
| 209298_s_at  | ITSN1             | 0,817 | 2,975  |
| 239253_at    |                   | 0,817 | 21,515 |
| 1557141_at   | INMT-FAM188B///F/ | 0,816 | 6,06   |
| 225578_at    | MZT1              | 0,816 | 3,994  |
| 204408_at    | APEX2             | 0,815 | 6,31   |
| 222993_at    | MRPL37            | 0,815 | 5,458  |
| 229711_s_at  | MDM2              | 0,815 | 4,338  |
| 231516_at    | LOC105371038      | 0,815 | 4,182  |
| 220973_s_at  | SHARPIN           | 0,814 | 4,77   |
| 223122_s_at  | SFRP2             | 0,814 | 6,265  |
| 229431_at    | RFXAP             | 0,814 | 2,263  |
| 229713_at    | PIP4K2A           | 0,814 | 2,279  |
| 37170_at     | BMP2K             | 0,814 | 3,244  |
| 1569025_s_at | FAM13A            | 0,813 | 8,151  |
| 203309_s_at  | HPS1              | 0,813 | 5,178  |
| 212546_s_at  | FRYL              | 0,813 | 7,592  |
| 217745_s_at  | NAA50             | 0,813 | 3,883  |
| 221401_at    | CACNG5            | 0,813 | 6,253  |
| 223542_at    | SLF1              | 0,813 | 4,127  |
| 1553528_a_at | TAF5              | 0,812 | 3,765  |
| 205757_at    | ENTPD5            | 0,812 | 4,413  |
| 211047_x_at  | AP2S1             | 0,812 | 3,802  |
| 211086_x_at  | NEK1              | 0,812 | 8,565  |
| 213476_x_at  | TUBB3             | 0,812 | 3,444  |
| 223570_at    | MCM10             | 0,812 | 2,512  |
| 223963_s_at  | IGF2BP2           | 0,812 | 4,627  |
| 236904_x_at  | TECTA             | 0,812 | 5,554  |
| 209111_at    | RNF5P1///RNF5     | 0,811 | 4,95   |
| 203270_at    | DTYMK             | 0,81  | 3,397  |
| 224657_at    | ERRFI1            | 0,81  | 4,355  |
| 226488_at    | RCCD1             | 0,81  | 3,894  |
| 244103_at    | SDE2              | 0,81  | 2,248  |
| 1557644_at   | RUNDC3A-AS1       | 0,809 | 24,333 |

Tabelle1

|              |                 |       |        |
|--------------|-----------------|-------|--------|
| 217317_s_at  | HERC2P9///HERC2 | 0,809 | 2,276  |
| 230528_s_at  | CENPBD1P1       | 0,809 | 3,92   |
| 209406_at    | BAG2            | 0,808 | 2,434  |
| 213249_at    | FBXL7           | 0,808 | 3,793  |
| 230770_at    |                 | 0,808 | 3,549  |
| 243171_at    | LOC100128325    | 0,808 | 2,535  |
| 1553804_a_at | SPATA32         | 0,807 | 6,923  |
| 204380_s_at  | FGFR3           | 0,807 | 3,305  |
| 220058_at    | GID4            | 0,807 | 5,235  |
| 232968_at    | FANK1           | 0,807 | 3,409  |
| 203145_at    | SPAG5           | 0,806 | 2,44   |
| 209212_s_at  | KLF5            | 0,806 | 2,966  |
| 221921_s_at  | CADM3           | 0,806 | 3,223  |
| 1559228_at   | CLU             | 0,805 | 2,768  |
| 225352_at    | SEC62           | 0,805 | 2,539  |
| 225736_at    | FBXO22          | 0,805 | 2,667  |
| 206807_s_at  | ADD2            | 0,804 | 4,398  |
| 220129_at    | CCDC169-SOHLH2  | 0,804 | 4,248  |
| 212084_at    | TEX261          | 0,803 | 3,337  |
| 213439_x_at  | RUNDC3A         | 0,803 | 2,416  |
| 214893_x_at  | HCN2            | 0,803 | 3,107  |
| 218111_s_at  | CMAS            | 0,803 | 4,248  |
| 202347_s_at  | UBE2K           | 0,802 | 5,947  |
| 223407_at    | ENKD1           | 0,802 | 3,307  |
| 238042_at    |                 | 0,801 | 2,723  |
| 203976_s_at  | CHAF1A          | 0,8   | 2,412  |
| 204244_s_at  | DBF4            | 0,8   | 3,552  |
| 222989_s_at  | UBQLN1          | 0,8   | 4,976  |
| 205932_s_at  | MSX1            | 0,799 | 21,936 |
| 213302_at    | PFAS            | 0,799 | 3,047  |
| 228429_x_at  | KIF9            | 0,799 | 2,739  |
| 233750_s_at  | TRMT1L          | 0,799 | 3,197  |
| 1553123_at   | WDR62           | 0,798 | 2,329  |
| 215076_s_at  | COL3A1          | 0,798 | 5,721  |
| 223363_at    | PSMG3           | 0,798 | 3,451  |
| 223375_at    | TBC1D22B        | 0,798 | 2,896  |
| 225395_s_at  | FAM120AOS       | 0,798 | 6,479  |
| 226749_at    | MRPS9           | 0,798 | 3,649  |
| 203092_at    | TIMM44          | 0,797 | 4,222  |
| 213965_s_at  | CHD5            | 0,797 | 3,935  |
| 231781_s_at  | LRRC2           | 0,797 | 11,362 |
| 242428_at    |                 | 0,797 | 7,258  |
| 205442_at    | MFAP3L          | 0,796 | 3,697  |
| 214091_s_at  | GPX3            | 0,796 | 3,207  |
| 220536_at    | VRTN            | 0,795 | 3,505  |
| 230345_at    | SEMA7A          | 0,795 | 2,707  |
| 1562002_at   | MYOZ3           | 0,794 | 3,203  |
| 1553954_at   | ALG14           | 0,793 | 6,022  |
| 209554_at    | CD36            | 0,793 | 6,486  |
| 217991_x_at  | SSBP3           | 0,793 | 3,99   |
| 222036_s_at  | MCM4            | 0,793 | 2,704  |
| 1552664_at   | FLCN            | 0,792 | 3,03   |
| 1556944_at   |                 | 0,792 | 4,494  |
| 204712_at    | WIF1            | 0,792 | 12,017 |
| 217061_s_at  | ETV1            | 0,792 | 3,788  |
| 1562048_at   | LOC152225       | 0,791 | 4,854  |
| 212802_s_at  | GAPVD1          | 0,791 | 7,053  |
| 221238_at    | HMGN5           | 0,791 | 8,966  |
| 223219_s_at  | CNOT10          | 0,791 | 5,164  |
| 226093_at    | DCP1B           | 0,791 | 3,683  |
| 232517_s_at  | HELZ2           | 0,791 | 2,361  |
| 1568691_at   | ARMC9           | 0,79  | 2,838  |
| 225271_at    | TMEM63B         | 0,79  | 3,034  |

Tabelle1

|              |                  |       |        |
|--------------|------------------|-------|--------|
| 228774_at    | CEP78            | 0,79  | 4,959  |
| 244600_at    | LOC100996583     | 0,79  | 4,895  |
| 207662_at    | TBX1             | 0,789 | 2,787  |
| 209644_x_at  | CDKN2A           | 0,789 | 2,438  |
| 210161_at    | NFATC1           | 0,789 | 2,96   |
| 210871_x_at  | SSX2IP           | 0,789 | 4,273  |
| 236496_at    | DEGS2            | 0,789 | 2,802  |
| 1557185_at   | TPCN1            | 0,788 | 2,834  |
| 203400_s_at  | TF               | 0,788 | 4,255  |
| 238136_at    | SHISA7           | 0,787 | 3,444  |
| 226936_at    | CENPW            | 0,786 | 2,322  |
| 228252_at    | PIF1             | 0,786 | 3,829  |
| 202779_s_at  | UBE2S            | 0,785 | 2,431  |
| 32128_at     | CCL18            | 0,785 | 5,302  |
| 208998_at    | UCP2             | 0,784 | 2,661  |
| 1556060_a_at | ZNF451           | 0,783 | 2,9    |
| 220335_x_at  | CES3             | 0,783 | 2,558  |
| 231218_at    |                  | 0,783 | 3,185  |
| 200795_at    | SPARCL1          | 0,782 | 3,577  |
| 211814_s_at  | CCNE2            | 0,782 | 3,628  |
| 224624_at    | LRRRC8A          | 0,782 | 3,105  |
| 226320_at    | ALYREF           | 0,782 | 3,105  |
| 206441_s_at  | COMMD4           | 0,78  | 2,408  |
| 227994_x_at  | PPDPF            | 0,78  | 2,909  |
| 212494_at    | TNS2             | 0,779 | 4,081  |
| 209625_at    | PIGH             | 0,778 | 3,447  |
| 212832_s_at  | CKAP5            | 0,778 | 4,421  |
| 242787_at    |                  | 0,778 | 3,243  |
| 204394_at    | SLC43A1          | 0,777 | 3,612  |
| 208964_s_at  | MIR1908///FADS1  | 0,777 | 3,081  |
| 223373_s_at  | PLA2G12A         | 0,777 | 2,366  |
| 1553372_at   |                  | 0,776 | 3,307  |
| 1558620_at   | ZNF621           | 0,776 | 4,517  |
| 227248_at    | PLEKHH3          | 0,776 | 11,715 |
| 52285_f_at   | CEP76            | 0,776 | 3,027  |
| 203522_at    | CCS              | 0,775 | 3,414  |
| 207013_s_at  | MMP16            | 0,775 | 2,801  |
| 210054_at    | HAUS3            | 0,775 | 3,91   |
| 214038_at    | CCL8             | 0,775 | 6,909  |
| 204482_at    | CLDN5            | 0,774 | 2,728  |
| 224758_at    | C7orf73          | 0,774 | 3,725  |
| 1569459_a_at |                  | 0,773 | 18,058 |
| 204423_at    | MKLN1            | 0,773 | 4,262  |
| 206650_at    | IQCC             | 0,773 | 2,718  |
| 223179_at    | YPEL3            | 0,773 | 2,846  |
| 217515_s_at  | CACNA1S          | 0,772 | 3,535  |
| 240352_at    | LOC101929609     | 0,772 | 7,646  |
| 211813_x_at  | DCN              | 0,771 | 11,649 |
| 204781_s_at  | FAS              | 0,77  | 2,557  |
| 211505_s_at  | STAU1            | 0,77  | 7,8    |
| 218118_s_at  | TIMM23B///TIMM23 | 0,77  | 3,701  |
| 234068_s_at  | AP2A1            | 0,77  | 2,368  |
| 237109_at    | TOM1L2           | 0,77  | 4,535  |
| 1555171_at   | ST3GAL3          | 0,769 | 3,927  |
| 215777_at    |                  | 0,769 | 3,294  |
| 228140_s_at  | PPP2R2C          | 0,769 | 4,811  |
| 235219_at    | EXOC3-AS1        | 0,769 | 7,773  |
| 213490_s_at  | MAP2K2           | 0,768 | 2,832  |
| 216607_s_at  | LRRD1///CYP51A1  | 0,768 | 2,515  |
| 217071_s_at  | MTHFR            | 0,767 | 6,835  |
| 235998_at    | RHPN1            | 0,767 | 2,744  |
| 201885_s_at  | CYB5R3           | 0,766 | 5,539  |
| 203272_s_at  | TUSC2            | 0,766 | 4,259  |

Tabelle1

|              |                    |       |        |
|--------------|--------------------|-------|--------|
| 204728_s_at  | WDHD1              | 0,766 | 3,598  |
| 216473_x_at  | DUX4L24///DBET///L | 0,766 | 4,191  |
| 219320_at    | MYO19              | 0,766 | 3,939  |
| 209194_at    | CETN2              | 0,765 | 3,229  |
| 221068_at    | KANK2              | 0,765 | 3,67   |
| 1558484_s_at | LRRC27             | 0,764 | 3,066  |
| 219490_s_at  | DCLRE1B            | 0,764 | 3,973  |
| 227653_at    | TRMT5              | 0,764 | 2,997  |
| 204435_at    | NUP58              | 0,763 | 2,532  |
| 209218_at    | SQLE               | 0,763 | 2,246  |
| 209440_at    | PRPS1              | 0,763 | 5,483  |
| 210243_s_at  | B4GALT3            | 0,763 | 5,823  |
| 221940_at    | RPUSD2             | 0,763 | 3,314  |
| 240516_at    |                    | 0,763 | 4,104  |
| 1554352_s_at | DENND4A            | 0,762 | 3,475  |
| 1554482_a_at | SAR1B              | 0,762 | 2,874  |
| 213227_at    | PGRMC2             | 0,762 | 3,049  |
| 226594_at    | ENTPD5             | 0,762 | 3,074  |
| 235113_at    | LRR1               | 0,762 | 2,996  |
| 222009_at    | CEMP1              | 0,761 | 2,918  |
| 223262_s_at  | FGFR10P2           | 0,761 | 2,215  |
| 201252_at    | PSMC4              | 0,76  | 4,61   |
| 206468_s_at  | METTL13            | 0,76  | 3,174  |
| 238329_at    |                    | 0,76  | 2,302  |
| 205519_at    | WDR76              | 0,759 | 2,639  |
| 226359_at    | GTPBP1             | 0,759 | 2,924  |
| 233747_at    |                    | 0,759 | 13,556 |
| 217289_s_at  | SLC37A4            | 0,758 | 3,29   |
| 221027_s_at  | PLA2G12A           | 0,758 | 2,727  |
| 223175_s_at  | FEM1A              | 0,758 | 4,649  |
| 203109_at    | UBE2M              | 0,757 | 3,754  |
| 203209_at    | RFC5               | 0,757 | 4,35   |
| 205346_at    | ST3GAL2            | 0,757 | 7,365  |
| 209082_s_at  | COL18A1            | 0,757 | 2,779  |
| 216961_s_at  | RPAIN              | 0,757 | 8,541  |
| 229677_at    | SLC39A3            | 0,757 | 2,57   |
| 1556154_a_at | SNAI3-AS1          | 0,756 | 3,399  |
| 202452_at    | ZER1               | 0,756 | 4,46   |
| 210439_at    | ICOS               | 0,756 | 2,551  |
| 211692_s_at  | MIR3190///MIR3191  | 0,756 | 3,27   |
| 229500_at    | SLC30A9            | 0,756 | 4,989  |
| 1552580_at   | TRIML2             | 0,755 | 11,469 |
| 1554293_at   | TTBK2              | 0,755 | 3,177  |
| 1570364_at   | ZNF709             | 0,755 | 4,257  |
| 230509_at    | SNX22              | 0,755 | 2,879  |
| 234825_at    |                    | 0,755 | 3,935  |
| 202830_s_at  | SLC37A4            | 0,754 | 2,452  |
| 203451_at    | LDB1               | 0,754 | 3,982  |
| 209026_x_at  | TUBB               | 0,754 | 2,581  |
| 209584_x_at  | APOBEC3C           | 0,754 | 3,797  |
| 32502_at     | GDPD5              | 0,754 | 3,12   |
| 36475_at     | GCAT               | 0,754 | 3,35   |
| 1554806_a_at | FBXO8              | 0,753 | 2,683  |
| 1563484_at   | LOC101927766       | 0,753 | 3,174  |
| 1566734_at   | LOC283454          | 0,753 | 3,175  |
| 211935_at    | ARL6IP1            | 0,753 | 4,073  |
| 218511_s_at  | PNPO               | 0,753 | 6,931  |
| 225156_at    | ELOF1              | 0,753 | 5,906  |
| 207278_s_at  | CD209              | 0,752 | 2,769  |
| 202992_at    | C7                 | 0,751 | 8,776  |
| 211959_at    | IGFBP5             | 0,751 | 2,383  |
| 226826_at    | LSM11              | 0,751 | 2,602  |
| 229263_at    | IL17RD             | 0,75  | 5,23   |

Tabelle1

|              |                   |       |        |
|--------------|-------------------|-------|--------|
| 201199_s_at  | PSMD1             | 0,749 | 4,828  |
| 208948_s_at  | STAU1             | 0,749 | 7,79   |
| 218632_at    | HECTD3            | 0,749 | 5,096  |
| 218906_x_at  | KLC2              | 0,749 | 2,543  |
| 223151_at    | DCUN1D5           | 0,749 | 3,931  |
| 1552846_s_at | RAB42             | 0,748 | 3,505  |
| 215788_at    | CFAP74            | 0,748 | 3,304  |
| 225341_at    | MTERF2            | 0,748 | 3,148  |
| 201284_s_at  | APEH              | 0,747 | 5,64   |
| 206491_s_at  | NAPA              | 0,747 | 2,723  |
| 209943_at    | FBXL4             | 0,747 | 3,435  |
| 217190_x_at  | ESR1              | 0,747 | 3,566  |
| 223924_at    | TTC25             | 0,747 | 3,065  |
| 1554631_at   | ATM               | 0,746 | 2,441  |
| 1563009_at   | LOC284930         | 0,746 | 3,66   |
| 203572_s_at  | TAF6              | 0,746 | 5,699  |
| 208924_at    | RNF11             | 0,746 | 2,356  |
| 211980_at    | COL4A1            | 0,746 | 5,315  |
| 212482_at    | RMND5A            | 0,746 | 4,165  |
| 230573_at    | SGK2              | 0,746 | 3,606  |
| 233698_at    |                   | 0,746 | 3,351  |
| 1569207_s_at | TCP11L2           | 0,745 | 2,462  |
| 200950_at    | ARPC1A            | 0,745 | 2,741  |
| 206167_s_at  | ARHGAP6           | 0,745 | 3,155  |
| 242923_at    | ZNF678            | 0,745 | 3,197  |
| 223498_at    | SPECC1            | 0,744 | 2,236  |
| 241741_at    | CRLS1             | 0,744 | 3,974  |
| 1562281_at   |                   | 0,743 | 11,562 |
| 205088_at    | MAMLD1            | 0,743 | 9,973  |
| 209355_s_at  | PLPP3             | 0,743 | 5,351  |
| 227357_at    | TAB3              | 0,743 | 5,24   |
| 239276_at    |                   | 0,742 | 6,414  |
| 211726_s_at  | FMO2              | 0,741 | 4,079  |
| 205018_s_at  | MBNL2             | 0,74  | 2,306  |
| 218432_at    | FBXO3             | 0,74  | 2,453  |
| 240443_at    |                   | 0,74  | 2,819  |
| 205575_at    | C1QL1             | 0,739 | 3,362  |
| 212593_s_at  | MIR4680///PDCD4   | 0,739 | 5,74   |
| 223289_s_at  | USP38             | 0,739 | 3,764  |
| 235330_at    | CCDC117           | 0,739 | 4,421  |
| 224320_s_at  | MCM8              | 0,738 | 2,197  |
| 239870_at    | SPATS1            | 0,738 | 8,063  |
| 228524_at    | ADCK5             | 0,737 | 4,579  |
| 243342_at    |                   | 0,737 | 2,786  |
| 1561899_at   | CLECL1            | 0,736 | 4,871  |
| 209505_at    | NR2F1             | 0,736 | 4,099  |
| 219494_at    | RAD54B            | 0,736 | 10,231 |
| 221490_at    | UBAP1             | 0,735 | 3,705  |
| 230163_at    | GFRA1             | 0,735 | 2,644  |
| 55705_at     | R3HDM4            | 0,735 | 3,703  |
| 201472_at    | VBP1              | 0,734 | 5,02   |
| 205167_s_at  | CDC25C            | 0,734 | 3,173  |
| 206800_at    | MTHFR             | 0,734 | 8,328  |
| 211018_at    | LSS               | 0,734 | 4,135  |
| 212564_at    | KCTD2             | 0,734 | 3,055  |
| 222634_s_at  | TBL1XR1           | 0,734 | 3,934  |
| 232296_s_at  | GFM1              | 0,734 | 3,111  |
| 235559_at    | INMT-FAM188B///F/ | 0,734 | 4,062  |
| 220992_s_at  | TRMT1L            | 0,733 | 2,243  |
| 244771_at    | KBTBD12           | 0,733 | 2,616  |
| 225765_at    | TNPO1             | 0,732 | 4,021  |
| 234019_at    |                   | 0,732 | 13,227 |
| 202103_at    | BRD4              | 0,731 | 3,917  |

Tabelle1

|              |                   |       |        |
|--------------|-------------------|-------|--------|
| 222365_at    | TBCEL             | 0,731 | 34,644 |
| 230907_at    | GPRC5C            | 0,73  | 4,529  |
| 225581_s_at  | MRPL50            | 0,729 | 2,531  |
| 1555614_at   | SUGT1P1           | 0,728 | 4,085  |
| 204448_s_at  | PDCL              | 0,728 | 3,273  |
| 204677_at    | CDH5              | 0,728 | 2,948  |
| 217961_at    | SLC25A38          | 0,728 | 3,48   |
| 223084_s_at  | CCNDBP1           | 0,728 | 2,536  |
| 232753_at    | ZNF346            | 0,728 | 4,995  |
| 243661_at    | LOC285902///ZNF2  | 0,728 | 9,377  |
| 1564287_at   | LINC00410         | 0,727 | 2,701  |
| 203706_s_at  | FZD7              | 0,727 | 4,466  |
| 213230_at    | CDR2L             | 0,727 | 3,93   |
| 218117_at    | RBX1              | 0,727 | 2,524  |
| 225848_at    | ZNF746            | 0,727 | 3,685  |
| 210776_x_at  | TCF3              | 0,726 | 2,73   |
| 219650_at    | ERCC6L            | 0,726 | 5,41   |
| 1552281_at   | SLC39A5           | 0,725 | 2,282  |
| 202845_s_at  | RALBP1            | 0,725 | 3,876  |
| 1555020_a_at | ARHGAP20          | 0,724 | 2,887  |
| 204819_at    | FGD1              | 0,724 | 2,601  |
| 205417_s_at  | DAG1              | 0,724 | 3,039  |
| 205506_at    | VIL1              | 0,724 | 6,361  |
| 224728_at    | ATPAF1            | 0,724 | 3,696  |
| 225324_at    | CRLS1             | 0,724 | 3,625  |
| 207017_at    | RAB27B            | 0,723 | 2,197  |
| 209752_at    | REG1A             | 0,723 | 13,834 |
| 209798_at    | NPAT              | 0,723 | 2,819  |
| 215420_at    | IHH               | 0,723 | 10,453 |
| 221251_x_at  | INO80B-WBP1///INC | 0,723 | 2,398  |
| 222381_at    |                   | 0,723 | 2,63   |
| 1560119_at   | LINC00937         | 0,722 | 7,832  |
| 213422_s_at  | MXRA8             | 0,722 | 3,545  |
| 220189_s_at  | MGAT4B            | 0,722 | 3,016  |
| 221947_at    | IL17RC            | 0,722 | 2,89   |
| 235425_at    | SGO2              | 0,722 | 2,306  |
| 40829_at     | WDTC1             | 0,722 | 4,26   |
| 203747_at    | AQP3              | 0,721 | 2,73   |
| 225686_at    | SKA2              | 0,721 | 2,271  |
| 238956_at    | EFNA2             | 0,721 | 16,209 |
| 1560932_at   | FLJ31356          | 0,72  | 3,011  |
| 202846_s_at  | PIGC              | 0,72  | 4,122  |
| 223298_s_at  | NT5C3A            | 0,72  | 3,531  |
| 237916_at    |                   | 0,72  | 8,727  |
| 223007_s_at  | TMEM245           | 0,719 | 3,527  |
| 240440_at    | NPL               | 0,719 | 4,42   |
| 1554271_a_at | CENPL             | 0,718 | 2,453  |
| 1554522_at   | CNNM2             | 0,718 | 2,344  |
| 209117_at    | WBP2              | 0,718 | 3,954  |
| 212714_at    | LARP4             | 0,718 | 3,076  |
| 212815_at    | ASCC3             | 0,718 | 3,233  |
| 215320_at    | SPATA31C2         | 0,718 | 5,516  |
| 216729_at    |                   | 0,718 | 2,371  |
| 224888_at    | EPT1              | 0,718 | 4,09   |
| 1553155_x_at | ATP6V0D2          | 0,717 | 2,411  |
| 1559537_at   | RNF130            | 0,717 | 6,835  |
| 205949_at    | CA1               | 0,717 | 6,543  |
| 206821_x_at  | AGFG2             | 0,717 | 3,088  |
| 213000_at    | MORC3             | 0,717 | 3,864  |
| 231370_at    | PPM1A             | 0,717 | 2,413  |
| 231648_at    |                   | 0,717 | 5,511  |
| 236604_at    | BAHCC1            | 0,717 | 2,479  |
| 240360_at    | BRD4              | 0,717 | 2,641  |

Tabelle1

|              |                 |       |        |
|--------------|-----------------|-------|--------|
| 204507_s_at  | PPP3R1          | 0,716 | 3,023  |
| 211702_s_at  | USP32           | 0,716 | 4,877  |
| 211714_x_at  | TUBB            | 0,716 | 2,638  |
| 222883_at    | COA7            | 0,716 | 2,636  |
| 226986_at    | WIPI2           | 0,716 | 3,32   |
| 235553_at    | GAPVD1          | 0,716 | 3,362  |
| 1558530_at   | LRTM2           | 0,715 | 2,291  |
| 1559252_a_at | LOC101929125    | 0,715 | 3,108  |
| 201823_s_at  | RNF14           | 0,715 | 3,03   |
| 205678_at    | AP3B2           | 0,715 | 4,039  |
| 215236_s_at  | PICALM          | 0,715 | 2,293  |
| 236629_at    | IBA57           | 0,715 | 2,784  |
| 209421_at    | MSH2            | 0,714 | 2,313  |
| 223338_s_at  | ATPIF1          | 0,714 | 2,354  |
| 225677_at    | BCAP29          | 0,714 | 2,968  |
| 230228_at    | SSC5D           | 0,714 | 2,315  |
| 231623_at    | TMEM174         | 0,714 | 6,582  |
| 1562099_at   |                 | 0,713 | 5,566  |
| 201672_s_at  | USP14           | 0,713 | 6,702  |
| 217264_s_at  | SCNN1A          | 0,713 | 3,142  |
| 227217_at    | WNK2            | 0,713 | 3,279  |
| 202410_x_at  | INS-IGF2///IGF2 | 0,712 | 27,348 |
| 204071_s_at  | TOPORS          | 0,712 | 3,051  |
| 231658_x_at  | RPL36           | 0,712 | 3,288  |
| 235644_at    | CCDC138         | 0,712 | 5,576  |
| 243508_at    | C20orf196       | 0,712 | 4,399  |
| 1565525_a_at | TCP11L2         | 0,711 | 4,234  |
| 203597_s_at  | WBP4            | 0,711 | 4,626  |
| 208693_s_at  | GARS            | 0,711 | 6,723  |
| 212877_at    | KLC1            | 0,711 | 4,055  |
| 231696_x_at  | TMEM50B         | 0,711 | 2,587  |
| 1563445_x_at | CTSLP8          | 0,71  | 2,18   |
| 201508_at    | IGFBP4          | 0,71  | 5,462  |
| 212511_at    | PICALM          | 0,71  | 3,136  |
| 219814_at    | MBNL3           | 0,71  | 3,092  |
| 228989_at    | TYMSOS          | 0,709 | 3,135  |
| 211762_s_at  | KPNA2           | 0,708 | 2,655  |
| 212506_at    | PICALM          | 0,708 | 2,925  |
| 214074_s_at  | CTTN            | 0,708 | 15,739 |
| 219674_s_at  | HDLBP           | 0,708 | 3,03   |
| 226881_at    | GRPEL2          | 0,708 | 3,457  |
| 45633_at     | GINS3           | 0,708 | 2,475  |
| 207493_x_at  | SSX2B///SSX2    | 0,707 | 5,066  |
| 213442_x_at  | SPDEF           | 0,707 | 2,958  |
| 240276_at    |                 | 0,707 | 2,683  |
| 214140_at    | SLC25A16        | 0,706 | 6,869  |
| 217919_s_at  | MRPL42          | 0,706 | 2,969  |
| 239056_at    | SEC22C          | 0,706 | 4,611  |
| 240421_x_at  | SAV1            | 0,706 | 5,022  |
| 242215_at    | LOC102725345    | 0,706 | 5,159  |
| 208667_s_at  | ST13            | 0,705 | 3,292  |
| 222573_s_at  | SAV1            | 0,705 | 2,829  |
| 244350_at    | MYO10           | 0,705 | 3,715  |
| 202120_x_at  | AP2S1           | 0,704 | 3,869  |
| 241952_at    | SLC16A11        | 0,704 | 2,659  |
| 1559667_at   |                 | 0,703 | 2,601  |
| 201924_at    | AFF1            | 0,703 | 3,273  |
| 204835_at    | POLA1           | 0,703 | 2,668  |
| 212356_at    | KHNYN           | 0,703 | 3,435  |
| 219416_at    | SCARA3          | 0,703 | 4,355  |
| 222889_at    | DCLRE1B         | 0,703 | 3,109  |
| 234000_s_at  | HACD3           | 0,703 | 2,533  |
| 202900_s_at  | NUP88           | 0,702 | 3,668  |

Tabelle1

|              |                   |       |        |
|--------------|-------------------|-------|--------|
| 212548_s_at  | FRYL              | 0,702 | 4,91   |
| 227472_at    | DDA1              | 0,702 | 8,571  |
| 1561218_s_at | LOC728099         | 0,701 | 2,923  |
| 212439_at    | IP6K1             | 0,701 | 3,405  |
| 224751_at    | LOC101930655///C7 | 0,701 | 3,225  |
| 240163_at    | RORA-AS1          | 0,701 | 3,414  |
| 241372_at    | ZC3H6             | 0,701 | 6,482  |
| 1569294_at   | RNF187            | 0,7   | 3,2    |
| 202227_s_at  | BRD8              | 0,7   | 4,329  |
| 208921_s_at  | SRI               | 0,7   | 3,051  |
| 213259_s_at  | SARM1             | 0,7   | 2,712  |
| 220290_at    | AIM1L             | 0,7   | 2,2    |
| 237505_at    |                   | 0,7   | 3,52   |
| 222770_s_at  | GUF1              | 0,699 | 3,896  |
| 238004_at    | PGBD2             | 0,699 | 2,363  |
| 238432_at    | DLGAP1-AS1        | 0,699 | 2,52   |
| 239458_at    | ALS2CR12          | 0,699 | 23,87  |
| 213037_x_at  | STAU1             | 0,698 | 6,991  |
| 226742_at    | SAR1B             | 0,698 | 5,006  |
| 226807_at    | ZFP1              | 0,698 | 2,732  |
| 228091_at    | STX17             | 0,698 | 3,894  |
| 230013_s_at  | ARHGAP23          | 0,698 | 6,774  |
| 231129_at    | MCHR2-AS1         | 0,698 | 3,125  |
| 243565_at    | CCDC150           | 0,698 | 3,794  |
| 240144_at    | DNASE1            | 0,697 | 3,955  |
| 59705_at     | SCLY              | 0,697 | 8,182  |
| 202222_s_at  | DES               | 0,696 | 2,86   |
| 219472_at    | CENPO             | 0,696 | 3,393  |
| 226554_at    | ZBTB7A            | 0,696 | 2,665  |
| 1554907_a_at | LOC101930373///H\ | 0,695 | 3,389  |
| 212127_at    | RANGAP1           | 0,695 | 2,803  |
| 212619_at    | NEMP1             | 0,695 | 2,768  |
| 227322_s_at  | BCCIP             | 0,695 | 5,957  |
| 214426_x_at  | CHAF1A            | 0,694 | 3,466  |
| 215134_at    | PI4K2A            | 0,694 | 4,936  |
| 223512_at    | SAR1B             | 0,694 | 3,019  |
| 230862_at    |                   | 0,694 | 7,262  |
| 1552903_at   | B4GALNT2          | 0,693 | 3,128  |
| 209021_x_at  | ATG13             | 0,693 | 3,857  |
| 216299_s_at  | XRCC3             | 0,693 | 2,348  |
| 1555278_a_at | CKAP5             | 0,692 | 3,172  |
| 1568675_at   | CHRNA10           | 0,692 | 3,646  |
| 201241_at    | DDX1              | 0,692 | 3,912  |
| 207257_at    | EPO               | 0,692 | 6,018  |
| 228291_s_at  | KIZ               | 0,692 | 2,731  |
| 236956_at    |                   | 0,692 | 2,365  |
| 232110_at    | GALNT5            | 0,691 | 7,109  |
| 208786_s_at  | MAP1LC3B          | 0,69  | 2,425  |
| 218707_at    | ZNF444            | 0,69  | 3,363  |
| 225535_s_at  | TIMM23B///TIMM23  | 0,69  | 3,36   |
| 231548_at    | FOXO3             | 0,69  | 4,168  |
| 202569_s_at  | MARK3             | 0,689 | 5,474  |
| 214239_x_at  | PCGF2             | 0,689 | 2,53   |
| 217111_at    | AMACR             | 0,689 | 5,371  |
| 225444_at    | UBN2              | 0,689 | 2,454  |
| 227869_at    | FAM104B           | 0,689 | 2,439  |
| 229668_at    |                   | 0,689 | 4,195  |
| 1554450_s_at | MIER3             | 0,688 | 2,552  |
| 202766_s_at  | FBN1              | 0,688 | 2,389  |
| 228794_at    | XIRP2             | 0,688 | 11,073 |
| 242203_at    |                   | 0,688 | 8,155  |
| 201187_s_at  | ITPR3             | 0,687 | 2,887  |
| 221984_s_at  | FAM134A           | 0,687 | 3,91   |



Tabelle1

|              |                    |       |        |
|--------------|--------------------|-------|--------|
| 222777_s_at  | WHSC1              | 0,687 | 2,944  |
| 237156_at    |                    | 0,687 | 4,283  |
| 1569714_at   | RBSN               | 0,686 | 2,698  |
| 207252_at    | INE1               | 0,686 | 2,606  |
| 213224_s_at  | BBIP1              | 0,686 | 4,496  |
| 219264_s_at  | PPP2R3B            | 0,686 | 2,903  |
| 243267_x_at  |                    | 0,686 | 9,908  |
| 244552_at    | ZNF788             | 0,686 | 2,931  |
| 201326_at    | CCT6A              | 0,685 | 4,558  |
| 204687_at    | PARM1              | 0,685 | 3,052  |
| 208942_s_at  | SEC62              | 0,685 | 3,889  |
| 209838_at    | COPS2              | 0,685 | 2,948  |
| 217883_at    | MMADHC             | 0,685 | 4,929  |
| 218198_at    | DHX32              | 0,685 | 3,132  |
| 218349_s_at  | ZWILCH             | 0,685 | 2,834  |
| 221050_s_at  | GTPBP2             | 0,685 | 4,643  |
| 230371_at    | HPS6               | 0,685 | 5,026  |
| 1558502_s_at | DNM3               | 0,684 | 7,569  |
| 202926_at    | NBAS               | 0,684 | 2,872  |
| 208851_s_at  | THY1               | 0,684 | 3,588  |
| 242441_at    |                    | 0,684 | 2,976  |
| 212789_at    | NCAPD3             | 0,683 | 3,193  |
| 213144_at    | GOSR2              | 0,683 | 3,458  |
| 225074_at    | RAB2B              | 0,683 | 2,81   |
| 231150_at    |                    | 0,683 | 3,208  |
| 243497_at    |                    | 0,683 | 5,216  |
| 1558292_s_at | PIGW               | 0,682 | 2,695  |
| 202303_x_at  | SMARCA5            | 0,682 | 3,544  |
| 204519_s_at  | PLLP               | 0,682 | 9,904  |
| 212378_at    | GART               | 0,682 | 2,61   |
| 222114_x_at  | WDR55              | 0,682 | 3,496  |
| 202424_at    | MAP2K2             | 0,681 | 4,682  |
| 218087_s_at  | SORBS1             | 0,681 | 7,777  |
| 228303_at    | GALNT6             | 0,681 | 2,716  |
| 230587_at    | STGC3              | 0,681 | 3,675  |
| 205276_s_at  | GTPBP1             | 0,68  | 2,433  |
| 207805_s_at  | PSMD9              | 0,68  | 3,726  |
| 203253_s_at  | PPIP5K2            | 0,679 | 2,79   |
| 207004_at    | BCL2               | 0,679 | 2,473  |
| 207172_s_at  | CDH11              | 0,679 | 5,289  |
| 209479_at    | CCDC28A            | 0,679 | 4,869  |
| 216402_at    | SEC14L4            | 0,679 | 16,526 |
| 241389_at    | CHRNA2             | 0,679 | 2,224  |
| 1552261_at   | WFDC2              | 0,678 | 2,232  |
| 1553264_a_at | SYN1               | 0,678 | 2,612  |
| 1558375_at   | LRRC38             | 0,678 | 3,269  |
| 210419_at    | BARX2              | 0,678 | 2,542  |
| 213186_at    | DZIP3              | 0,678 | 2,204  |
| 222570_at    | NCS1               | 0,678 | 9,112  |
| 243730_at    |                    | 0,678 | 2,298  |
| 229976_at    | MORN5              | 0,677 | 5,426  |
| 201499_s_at  | USP7               | 0,676 | 5,708  |
| 202399_s_at  | C15orf38-AP3S2///A | 0,676 | 4,96   |
| 224287_at    |                    | 0,676 | 3,768  |
| 225078_at    | EMP2               | 0,676 | 3,944  |
| 227066_at    | MOB3C              | 0,676 | 4,736  |
| 1569306_at   | LOC105371622       | 0,675 | 2,43   |
| 214110_s_at  | LOC654342///LOC6   | 0,675 | 6,592  |
| 223910_at    | ERN2               | 0,675 | 3,165  |
| 234672_s_at  | NDC1               | 0,675 | 2,994  |
| 237324_s_at  | HKDC1              | 0,675 | 4,473  |
| 239125_at    | SLC25A5-AS1        | 0,675 | 6,378  |
| 1553535_a_at | RANGAP1            | 0,674 | 4,164  |

Tabelle1

|              |                   |       |        |
|--------------|-------------------|-------|--------|
| 207520_at    | TROVE2            | 0,674 | 4,049  |
| 209923_s_at  | BRAP              | 0,674 | 3,224  |
| 211851_x_at  | BRCA1             | 0,674 | 3,448  |
| 201149_s_at  | TIMP3             | 0,672 | 2,583  |
| 209452_s_at  | VTI1B             | 0,672 | 3,983  |
| 209622_at    | STK16             | 0,672 | 2,87   |
| 228753_at    | LOC101927974      | 0,672 | 4,302  |
| 204684_at    | NPTX1             | 0,671 | 2,549  |
| 1556801_at   | LOC400794         | 0,67  | 3,819  |
| 1560477_a_at | SAMD11            | 0,67  | 2,243  |
| 1568699_at   | IFT43             | 0,67  | 4,49   |
| 205040_at    | ORM1              | 0,67  | 2,7    |
| 220183_s_at  | NUDT6             | 0,67  | 4,603  |
| 33494_at     | ETFDH             | 0,67  | 2,682  |
| 214431_at    | GMPS              | 0,669 | 2,671  |
| 220849_at    | LOC79999          | 0,669 | 6,575  |
| 206709_x_at  | GPT               | 0,668 | 2,587  |
| 218926_at    | MYNN              | 0,668 | 6,701  |
| 221084_at    | HTR3B             | 0,668 | 4,284  |
| 231625_at    | SLC22A9           | 0,668 | 4,541  |
| 239617_at    | GHRLOS            | 0,668 | 4,026  |
| 1556852_a_at |                   | 0,667 | 2,248  |
| 218077_s_at  | ZDHHC3            | 0,667 | 4,761  |
| 232112_at    | RALGPS2           | 0,667 | 2,334  |
| 201588_at    | TXNL1             | 0,666 | 5,976  |
| 204311_at    | ATP1B2            | 0,666 | 7,079  |
| 212563_at    | MIR7112///BOP1    | 0,666 | 2,187  |
| 219439_at    | C1GALT1           | 0,666 | 4,066  |
| 213811_x_at  | TCF3              | 0,665 | 2,554  |
| 228286_at    | GEN1              | 0,665 | 2,602  |
| 1569665_at   |                   | 0,664 | 2,738  |
| 211968_s_at  | HSP90AA1          | 0,664 | 3,948  |
| 226360_at    | ZNRF3             | 0,664 | 3,242  |
| 226463_at    | ATP6V1C1          | 0,664 | 2,416  |
| 1554533_at   | C2                | 0,663 | 4,832  |
| 203598_s_at  | WBP4              | 0,663 | 5,816  |
| 213730_x_at  | TCF3              | 0,663 | 2,28   |
| 217320_at    | LOC100293211      | 0,663 | 3,631  |
| 235396_at    | TANGO2            | 0,663 | 4,138  |
| 242849_at    |                   | 0,663 | 8,431  |
| 203660_s_at  | PCNT              | 0,662 | 3,929  |
| 205084_at    | BCAP29            | 0,662 | 2,878  |
| 217043_s_at  | MFN1              | 0,662 | 7,364  |
| 237715_at    |                   | 0,662 | 2,217  |
| 240203_at    |                   | 0,662 | 16,821 |
| 243148_at    |                   | 0,662 | 3,988  |
| 1559788_at   |                   | 0,661 | 2,997  |
| 1567590_at   | METTL15           | 0,661 | 2,353  |
| 208824_x_at  | CDK16             | 0,661 | 4,937  |
| 232289_at    | LOC100996843///KC | 0,661 | 2,231  |
| 1556954_at   | CASC22            | 0,66  | 6,912  |
| 225723_at    | CCDC167           | 0,66  | 2,365  |
| 227560_at    | SFXN2             | 0,66  | 3,115  |
| 236867_at    |                   | 0,66  | 2,246  |
| 242804_at    | POLN              | 0,66  | 3,271  |
| 206403_at    | ZNF536            | 0,659 | 2,35   |
| 209517_s_at  | ASH2L             | 0,659 | 4,893  |
| 219879_s_at  | C17orf53          | 0,659 | 3,786  |
| 223039_at    | GUCD1             | 0,659 | 3,295  |
| 227045_at    | ZNF614            | 0,659 | 2,443  |
| 204954_s_at  | DYRK1B            | 0,658 | 2,57   |
| 217053_x_at  | ETV1              | 0,658 | 3,52   |
| 223806_s_at  | NAPSA             | 0,658 | 3,422  |

Tabelle1

|              |                  |       |        |
|--------------|------------------|-------|--------|
| 228436_at    | KCNC4            | 0,658 | 2,919  |
| 232468_at    |                  | 0,658 | 5,452  |
| 240376_s_at  |                  | 0,658 | 3,51   |
| 201053_s_at  | PSMF1            | 0,657 | 3,004  |
| 201096_s_at  | ARF4             | 0,657 | 3,888  |
| 205500_at    | C5               | 0,657 | 2,333  |
| 222739_at    | TMEM62           | 0,657 | 2,209  |
| 235993_at    | PSMF1            | 0,657 | 3,46   |
| 201099_at    | USP9X            | 0,656 | 5,696  |
| 228435_at    | FEM1A            | 0,656 | 3,426  |
| 240056_at    | NSMAF            | 0,656 | 2,558  |
| 242392_at    | UBE2U            | 0,656 | 6,854  |
| 1554019_s_at | CEP57L1          | 0,655 | 4,108  |
| 1558101_at   | NFIA             | 0,655 | 8,197  |
| 1567013_at   | NFE2L2           | 0,655 | 2,257  |
| 206005_s_at  | CEP162           | 0,655 | 2,958  |
| 209052_s_at  | WHSC1            | 0,655 | 2,743  |
| 213464_at    | SHC2             | 0,655 | 3,213  |
| 214474_at    | PRKAB2           | 0,655 | 4,539  |
| 221685_s_at  | SPDL1            | 0,655 | 2,775  |
| 226209_at    | NDUFV3           | 0,655 | 2,516  |
| 218306_s_at  | HERC1            | 0,654 | 4,36   |
| 228274_at    | SDSL             | 0,654 | 5,838  |
| 243989_at    |                  | 0,654 | 2,376  |
| 1553002_at   | DEFB105B///DEFB1 | 0,653 | 2,378  |
| 1569724_at   |                  | 0,653 | 4,131  |
| 225130_at    | ZRANB1           | 0,653 | 2,485  |
| 233933_s_at  | OTUD5            | 0,653 | 5,498  |
| 236630_at    | AQP2             | 0,653 | 4,92   |
| 205235_s_at  | KIF20B           | 0,652 | 2,294  |
| 209921_at    | SLC7A11          | 0,652 | 2,523  |
| 216241_s_at  | TCEA1            | 0,652 | 3,855  |
| 1552325_at   | CFAP53           | 0,651 | 10,899 |
| 203705_s_at  | FZD7             | 0,651 | 3,165  |
| 205301_s_at  | OGG1             | 0,651 | 2,832  |
| 214086_s_at  | PARP2            | 0,651 | 2,396  |
| 216427_at    | TMEM92-AS1       | 0,651 | 5,88   |
| 219775_s_at  | CPLX3            | 0,651 | 4,15   |
| 241908_at    | BROX             | 0,651 | 3,555  |
| 43544_at     | MED16            | 0,651 | 3,964  |
| 1564314_at   | LOC219690        | 0,65  | 7,042  |
| 202421_at    | IGSF3            | 0,65  | 5,826  |
| 203487_s_at  | ARMC8            | 0,65  | 2,632  |
| 216504_s_at  | SLC39A8          | 0,65  | 3,435  |
| 225201_s_at  | MRPL14           | 0,65  | 2,254  |
| 226616_s_at  | NDUFV3           | 0,65  | 3,195  |
| 205406_s_at  | SPA17            | 0,649 | 4,742  |
| 213616_at    | TPGS2            | 0,649 | 2,951  |
| 218308_at    | TACC3            | 0,649 | 2,302  |
| 226946_at    | NADK2            | 0,649 | 2,676  |
| 237884_x_at  | TRPM7            | 0,649 | 3,086  |
| 1554641_a_at | TET3             | 0,648 | 2,703  |
| 1561650_s_at | LOC285692        | 0,648 | 7,869  |
| 207320_x_at  | STAU1            | 0,648 | 6,202  |
| 209506_s_at  | NR2F2///NR2F1    | 0,648 | 2,723  |
| 229386_at    | ID4              | 0,648 | 2,636  |
| 237131_at    | RIIAD1           | 0,648 | 2,523  |
| 241380_at    | ARHGEF37         | 0,648 | 2,729  |
| 1553284_s_at | LMLN             | 0,647 | 3,161  |
| 226467_at    | TANGO6           | 0,647 | 2,257  |
| 233387_s_at  | PCNT             | 0,647 | 4,004  |
| 239250_at    | ZNF542P          | 0,647 | 2,844  |
| 1563919_a_at | CEP89            | 0,646 | 2,813  |

Tabelle1

|              |                  |       |        |
|--------------|------------------|-------|--------|
| 204302_s_at  | CTIF             | 0,646 | 2,34   |
| 232546_at    | TP73             | 0,646 | 7,184  |
| 233110_s_at  | BCL2L12          | 0,646 | 3,179  |
| 244281_at    | REXO1            | 0,646 | 2,626  |
| 208412_s_at  | RARB             | 0,645 | 6,27   |
| 214063_s_at  | TF               | 0,645 | 3,406  |
| 215454_x_at  | SFTPC            | 0,645 | 5,582  |
| 216251_s_at  | TTLL12           | 0,645 | 3,772  |
| 218365_s_at  | DARS2            | 0,645 | 3,069  |
| 218622_at    | NUP37            | 0,645 | 2,299  |
| 233208_x_at  | CPSF2            | 0,645 | 2,591  |
| 203363_s_at  | ATG13            | 0,644 | 5,26   |
| 208747_s_at  | C1S              | 0,644 | 6,682  |
| 210290_at    | ZNF174           | 0,644 | 10,591 |
| 222210_at    | MIR6785///TMEM94 | 0,644 | 5,178  |
| 226746_s_at  | UBE4B            | 0,644 | 6,115  |
| 230879_at    | BAG2             | 0,644 | 2,6    |
| 215554_at    | GPLD1            | 0,643 | 22,496 |
| 222250_s_at  | INTS7            | 0,643 | 2,818  |
| 223759_s_at  | GSG2             | 0,643 | 2,849  |
| 225278_at    | PRKAB2           | 0,643 | 2,948  |
| 235650_at    | CDHR3            | 0,643 | 2,761  |
| 1570631_at   |                  | 0,642 | 2,474  |
| 207804_s_at  | FCN2             | 0,642 | 2,818  |
| 208899_x_at  | ATP6V1D          | 0,642 | 3,436  |
| 222405_at    | HACD3            | 0,642 | 2,192  |
| 207019_s_at  | AKAP4            | 0,641 | 3,154  |
| 207808_s_at  | PROS1            | 0,641 | 2,994  |
| 211677_x_at  | CADM3            | 0,641 | 2,315  |
| 212744_at    | BBS4             | 0,641 | 3,174  |
| 232194_at    | METTL4           | 0,641 | 3,307  |
| 237454_at    |                  | 0,641 | 2,448  |
| 240343_at    |                  | 0,641 | 9,711  |
| 229832_x_at  | SH3TC1           | 0,64  | 2,915  |
| 1562670_at   | LOC105370629     | 0,639 | 5,935  |
| 1560848_at   | LOC101927490     | 0,638 | 3,657  |
| 201198_s_at  | PSMD1            | 0,638 | 5,833  |
| 202852_s_at  | AAGAB            | 0,638 | 2,562  |
| 209335_at    | DCN              | 0,638 | 13,724 |
| 211060_x_at  | GPAA1            | 0,638 | 4,261  |
| 211149_at    | UTY              | 0,638 | 3,477  |
| 220824_at    |                  | 0,638 | 2,194  |
| 238187_at    | C2orf57          | 0,638 | 2,453  |
| 244566_at    |                  | 0,638 | 2,191  |
| 201100_s_at  | USP9X            | 0,637 | 3,842  |
| 203180_at    | ALDH1A3          | 0,637 | 10,464 |
| 203816_at    | DGUOK            | 0,637 | 2,291  |
| 207021_at    | ZBPB             | 0,637 | 5,417  |
| 207868_at    | CHRNA2           | 0,637 | 2,198  |
| 208159_x_at  | DDX11            | 0,637 | 2,553  |
| 229845_at    | MAPKAP1          | 0,637 | 2,882  |
| 243740_at    |                  | 0,637 | 4,725  |
| 225682_s_at  | POLR3H           | 0,636 | 2,225  |
| 227744_s_at  | HNRNPD           | 0,636 | 3,649  |
| 232473_at    | LOC101928524     | 0,636 | 5,361  |
| 239073_at    | ANKFY1           | 0,636 | 3,486  |
| 209208_at    | MPDU1            | 0,635 | 4,203  |
| 243846_x_at  |                  | 0,635 | 2,872  |
| 1558211_s_at | SRC              | 0,634 | 3,227  |
| 1569139_s_at | FAM53A           | 0,634 | 3,161  |
| 223461_at    | TBC1D7           | 0,634 | 5,367  |
| 209120_at    | NR2F2            | 0,633 | 12,187 |
| 214234_s_at  | CYP3A5           | 0,633 | 2,476  |

Tabelle1

|              |                 |       |        |
|--------------|-----------------|-------|--------|
| 219844_at    | CCDC186         | 0,633 | 3,263  |
| 221550_at    | COX15           | 0,633 | 2,686  |
| 221696_s_at  | STYK1           | 0,633 | 2,491  |
| 227269_s_at  | RAB40C          | 0,633 | 2,904  |
| 230438_at    | TBX15           | 0,633 | 3,496  |
| 236607_at    |                 | 0,633 | 2,218  |
| 1553288_a_at | NYAP1           | 0,632 | 2,242  |
| 1559827_at   | LINC00960       | 0,632 | 4,684  |
| 214699_x_at  | WIPI2           | 0,632 | 3,864  |
| 215384_s_at  | MAP1A           | 0,632 | 2,45   |
| 225684_at    | SKA2            | 0,632 | 2,256  |
| 234375_x_at  |                 | 0,632 | 12,561 |
| 1558460_at   | ABCC5           | 0,631 | 4,21   |
| 1565639_a_at | PMP22           | 0,631 | 3,724  |
| 202753_at    | PSMD6           | 0,631 | 5,522  |
| 203089_s_at  | HTRA2           | 0,631 | 3,653  |
| 208447_s_at  | PRPS1           | 0,631 | 3,214  |
| 217430_x_at  | COL1A1          | 0,63  | 2,432  |
| 222504_s_at  | EMC8            | 0,63  | 2,753  |
| 229474_at    | MICAL3          | 0,63  | 3,329  |
| 216205_s_at  | MFN2            | 0,629 | 4,479  |
| 201130_s_at  | CDH1            | 0,628 | 8,18   |
| 242666_at    | PIK3IP1-AS1     | 0,628 | 2,502  |
| 200830_at    | PSMD2           | 0,627 | 7,221  |
| 201267_s_at  | PSMC3           | 0,627 | 2,994  |
| 201972_at    | ATP6V1A         | 0,627 | 2,565  |
| 206083_at    | ADGRB1          | 0,627 | 2,234  |
| 221987_s_at  | TSR1            | 0,627 | 2,58   |
| 232118_at    |                 | 0,627 | 6,594  |
| 237457_at    | EIF3B           | 0,627 | 2,212  |
| 238662_at    | DPH6            | 0,627 | 3,759  |
| 1552660_a_at | C5orf22         | 0,626 | 2,575  |
| 1555288_s_at | FBF1            | 0,626 | 2,683  |
| 200694_s_at  | DDX24           | 0,626 | 5,706  |
| 204599_s_at  | MRPL28          | 0,626 | 2,618  |
| 208149_x_at  | DDX11           | 0,626 | 2,531  |
| 222404_x_at  | HACD3           | 0,626 | 2,216  |
| 222705_s_at  | SLC25A15        | 0,626 | 6,082  |
| 224134_at    | MGC10814        | 0,626 | 3,864  |
| 225160_x_at  | MDM2            | 0,626 | 3,379  |
| 230449_x_at  |                 | 0,626 | 2,185  |
| 1553872_at   | NATD1           | 0,625 | 2,191  |
| 1561732_at   | LOC101929181    | 0,625 | 3,937  |
| 201738_at    | EIF1B           | 0,625 | 2,578  |
| 210975_x_at  | FASTK           | 0,625 | 2,318  |
| 213776_at    | LOC157562       | 0,625 | 2,23   |
| 215897_at    | MED25           | 0,625 | 3,39   |
| 219429_at    | FA2H            | 0,625 | 5,874  |
| 227485_at    | INTS6L          | 0,625 | 3,143  |
| 42361_g_at   | CCHCR1          | 0,625 | 4,947  |
| 244320_at    | NHLRC2          | 0,624 | 2,952  |
| 1552314_a_at | EYA3            | 0,623 | 2,973  |
| 201175_at    | TMX2            | 0,623 | 4,494  |
| 220782_x_at  | KLK12           | 0,623 | 2,552  |
| 230556_at    | IMMP1L          | 0,623 | 5,343  |
| 234919_s_at  | SNTG1           | 0,623 | 3,91   |
| 243517_at    |                 | 0,623 | 4,8    |
| 202294_at    | STAG1           | 0,622 | 4,657  |
| 227638_at    | EPG5            | 0,622 | 4,928  |
| 1553399_a_at | MGC57346///CRHR | 0,621 | 2,635  |
| 202140_s_at  | CLK3            | 0,621 | 4,683  |
| 211337_s_at  | TUBGCP4         | 0,621 | 3,951  |
| 212756_s_at  | UBR2            | 0,621 | 5,525  |

Tabelle1

|              |                  |       |       |
|--------------|------------------|-------|-------|
| 219585_at    | CCDC28B          | 0,621 | 3,696 |
| 220839_at    | METTL5           | 0,621 | 2,457 |
| 221545_x_at  | MED16            | 0,621 | 3,492 |
| 231015_at    | KLF15            | 0,621 | 5,447 |
| 231609_at    | C10orf82         | 0,621 | 3,344 |
| 244765_at    | LOC102724782     | 0,621 | 2,72  |
| 1563119_at   | HP09025          | 0,62  | 3,759 |
| 221031_s_at  | APOLD1           | 0,62  | 2,432 |
| 238729_x_at  | SAV1             | 0,62  | 4,463 |
| 241326_at    | AK7              | 0,62  | 2,926 |
| 201618_x_at  | GPAA1            | 0,619 | 3,84  |
| 207642_at    | HCRT             | 0,619 | 5,525 |
| 223788_at    | GTPBP2           | 0,619 | 3,117 |
| 231510_at    |                  | 0,619 | 7,682 |
| 1563420_at   | XGY2///XG        | 0,618 | 3,212 |
| 218218_at    | APPL2            | 0,618 | 2,612 |
| 219449_s_at  | TMEM70           | 0,618 | 2,454 |
| 240303_at    | TMC5             | 0,618 | 2,461 |
| 241561_at    |                  | 0,618 | 2,38  |
| 244834_at    | RSG1             | 0,618 | 2,713 |
| 213344_s_at  | H2AFX            | 0,617 | 4,142 |
| 216617_s_at  | MAG              | 0,617 | 3,064 |
| 203352_at    | ORC4             | 0,616 | 3,507 |
| 216031_x_at  | HN1L             | 0,616 | 2,88  |
| 222981_s_at  | RAB10            | 0,616 | 2,524 |
| 202183_s_at  | KIF22            | 0,615 | 3,387 |
| 217150_s_at  | NF2              | 0,615 | 2,834 |
| 228017_s_at  | NKAIN4           | 0,615 | 8,677 |
| 229547_s_at  | WNK2             | 0,615 | 3,778 |
| 201001_s_at  | TMEM189-UBE2V1/  | 0,614 | 3,754 |
| 207098_s_at  | MFN1             | 0,614 | 3,249 |
| 207349_s_at  | UCP3             | 0,614 | 3,213 |
| 238859_at    | FAM149B1         | 0,614 | 2,56  |
| 200954_at    | ATP6V0C          | 0,613 | 2,456 |
| 203207_s_at  | MTFR1            | 0,613 | 2,439 |
| 203351_s_at  | ORC4             | 0,613 | 3,583 |
| 239931_at    |                  | 0,613 | 4,038 |
| 1554810_at   | PLA2G4C          | 0,612 | 4,63  |
| 201391_at    | TRAP1            | 0,612 | 2,831 |
| 238037_at    | LMLN             | 0,612 | 2,822 |
| 1554413_s_at | SNX29P1///SNX29P | 0,611 | 3,264 |
| 201383_s_at  | NBR1             | 0,611 | 2,646 |
| 218480_at    | AGBL5            | 0,611 | 2,204 |
| 219912_s_at  | ENPP3            | 0,611 | 4,341 |
| 224598_at    | MGAT4B           | 0,611 | 3,286 |
| 1567320_at   |                  | 0,61  | 5,133 |
| 1568667_s_at | PLIN5            | 0,61  | 2,444 |
| 209241_x_at  | MINK1            | 0,61  | 2,297 |
| 217390_x_at  |                  | 0,61  | 2,497 |
| 217493_x_at  | NCR2             | 0,61  | 2,19  |
| 232997_at    |                  | 0,61  | 5,407 |
| 1553840_a_at | CCDC149          | 0,609 | 2,807 |
| 201905_s_at  | CTDSPL           | 0,609 | 3,759 |
| 205530_at    | ETFDH            | 0,608 | 2,211 |
| 207428_x_at  | CDK11A///CDK11B  | 0,608 | 3,163 |
| 208795_s_at  | MCM7             | 0,608 | 2,626 |
| 222606_at    | ZWILCH           | 0,608 | 3,47  |
| 229576_s_at  | TBX3             | 0,608 | 3,475 |
| 232497_at    | ZNF3             | 0,608 | 2,921 |
| 1554686_at   | STAU2            | 0,607 | 3,152 |
| 200708_at    | GOT2             | 0,607 | 2,483 |
| 207228_at    | PRKACG           | 0,607 | 3,342 |
| 208220_x_at  | AMELY            | 0,607 | 2,564 |

Tabelle1

|              |                   |       |        |
|--------------|-------------------|-------|--------|
| 221240_s_at  | B3GNT4            | 0,607 | 3,051  |
| 224503_s_at  | ZCCHC2            | 0,607 | 4,949  |
| 230125_at    | GUSB              | 0,607 | 2,912  |
| 202504_at    | TRIM29            | 0,606 | 9,475  |
| 208758_at    | ATIC              | 0,606 | 2,393  |
| 211468_s_at  | RECQL5            | 0,606 | 29,604 |
| 220200_s_at  | KMT5A             | 0,606 | 3,184  |
| 212822_at    | HEG1              | 0,605 | 2,758  |
| 217660_at    | MYH14             | 0,605 | 4,955  |
| 225300_at    | KNSTRN            | 0,605 | 2,456  |
| 226416_at    | ERI1              | 0,605 | 2,202  |
| 229978_at    | SHISA9            | 0,605 | 2,211  |
| 236666_s_at  | LRRC10B           | 0,605 | 11,705 |
| 201852_x_at  | COL3A1            | 0,604 | 4,99   |
| 206955_at    | LOC101930168///LC | 0,604 | 2,575  |
| 219495_s_at  | ZNF180            | 0,604 | 2,698  |
| 223252_at    | HDGFRP2           | 0,604 | 2,965  |
| 232490_s_at  | PRUNE1            | 0,604 | 3,1    |
| 235007_at    | BBS7              | 0,604 | 4,633  |
| 1566647_s_at | LINC01225         | 0,603 | 2,951  |
| 211152_s_at  | HTRA2             | 0,603 | 2,823  |
| 220234_at    | CA8               | 0,603 | 7,873  |
| 238974_at    | C2orf69           | 0,603 | 3,513  |
| 1567240_x_at | OR2L2             | 0,602 | 2,574  |
| 205554_s_at  | DNASE1L3          | 0,602 | 2,532  |
| 213525_at    |                   | 0,602 | 3,079  |
| 236360_at    | LINC00982         | 0,602 | 4,7    |
| 238093_at    | C9orf173-AS1      | 0,602 | 5,809  |
| 240541_at    |                   | 0,602 | 3,557  |
| 244052_at    | CBR4              | 0,602 | 2,679  |
| 203794_at    | CDC42BPA          | 0,601 | 4,474  |
| 212125_at    | RANGAP1           | 0,601 | 3,709  |
| 227171_at    | CCT4              | 0,601 | 2,764  |
| 1557558_s_at | MATN1-AS1         | 0,6   | 2,246  |
| 233828_at    | LOC105373860      | 0,6   | 3,23   |
| 1552582_at   | ABCC13            | 0,599 | 20     |
| 1563611_at   |                   | 0,599 | 5,492  |
| 206066_s_at  | RAD51C            | 0,599 | 2,755  |
| 208874_x_at  | PTPA              | 0,599 | 2,937  |
| 219110_at    | GAR1              | 0,599 | 2,86   |
| 223785_at    | FANCI             | 0,599 | 2,304  |
| 1561590_a_at | CNTFR-AS1         | 0,598 | 3,599  |
| 211953_s_at  | IPO5              | 0,598 | 2,379  |
| 216272_x_at  | SYDE1             | 0,598 | 2,503  |
| 233498_at    | ERBB4             | 0,598 | 3,154  |
| 238007_at    | ZNF271P           | 0,598 | 3,176  |
| 202562_s_at  | C14orf1           | 0,597 | 2,757  |
| 206777_s_at  | CRYBB2P1///CRYBI  | 0,597 | 2,355  |
| 210095_s_at  | IGFBP3            | 0,597 | 3,481  |
| 213982_s_at  | RABGAP1L          | 0,597 | 3,496  |
| 225460_at    | SEC22C            | 0,597 | 5,857  |
| 231470_at    | LINC00664         | 0,597 | 5,974  |
| 201741_x_at  | SRSF1             | 0,596 | 4,166  |
| 210988_s_at  | PRUNE1            | 0,596 | 2,206  |
| 212102_s_at  | KPNA6             | 0,596 | 4,199  |
| 216969_s_at  | KIF22             | 0,596 | 2,957  |
| 226956_at    | MTMR3             | 0,596 | 2,822  |
| 231554_at    | TPD52L3           | 0,596 | 3,492  |
| 234092_s_at  | TM6SF2            | 0,596 | 2,626  |
| 1556824_at   |                   | 0,595 | 2,551  |
| 1559946_s_at | RUVBL2            | 0,595 | 2,438  |
| 1563222_at   | TMBIM4            | 0,595 | 2,26   |
| 209570_s_at  | NSG1              | 0,595 | 2,483  |

Tabelle1

|              |                 |       |        |
|--------------|-----------------|-------|--------|
| 218326_s_at  | LGR4            | 0,595 | 2,813  |
| 222946_s_at  | AUNIP           | 0,595 | 10,554 |
| 228634_s_at  | YBX3            | 0,595 | 2,363  |
| 201528_at    | RPA1            | 0,594 | 2,546  |
| 241187_at    |                 | 0,594 | 3,694  |
| 1561314_at   | LOC101928658    | 0,593 | 4,09   |
| 209932_s_at  | DUT             | 0,593 | 2,411  |
| 212216_at    | PREPL           | 0,593 | 2,231  |
| 218460_at    | DNAAF5          | 0,593 | 2,956  |
| 222804_x_at  | DCAF10          | 0,593 | 3,576  |
| 1556779_s_at |                 | 0,592 | 2,235  |
| 203450_at    | CBY1            | 0,592 | 2,296  |
| 208379_x_at  | NPY2R           | 0,592 | 4,086  |
| 224074_at    | VSX1            | 0,592 | 5,689  |
| 206653_at    | POLR3G          | 0,591 | 2,739  |
| 218550_s_at  | LRRC20          | 0,591 | 2,747  |
| 220288_at    | MYO15A          | 0,591 | 2,886  |
| 224982_at    | AKT1S1          | 0,591 | 2,866  |
| 234187_at    |                 | 0,591 | 3,896  |
| 1559272_at   | EXOC3L1         | 0,59  | 2,567  |
| 1560559_at   |                 | 0,59  | 2,631  |
| 211863_x_at  | HFE             | 0,59  | 2,729  |
| 222861_x_at  | FBXO44          | 0,59  | 2,361  |
| 228066_at    | C17orf96        | 0,59  | 4,187  |
| 204078_at    | P3H4            | 0,589 | 3,916  |
| 207239_s_at  | CDK16           | 0,589 | 3,494  |
| 210304_at    | PDE6B           | 0,589 | 2,367  |
| 215530_at    | FANCA           | 0,589 | 2,615  |
| 233421_s_at  | NUP133          | 0,589 | 2,988  |
| 203225_s_at  | RFK             | 0,588 | 2,542  |
| 215490_at    | IBA57           | 0,588 | 2,228  |
| 221122_at    | HRASLS2         | 0,588 | 2,222  |
| 223008_s_at  | TMEM245         | 0,588 | 2,581  |
| 224188_s_at  | XPNPEP3         | 0,588 | 3,129  |
| 1553998_at   | DMRTC1B///DMRTC | 0,587 | 3,004  |
| 1556754_at   | LINC00856       | 0,587 | 2,232  |
| 203220_s_at  | TLE1            | 0,587 | 2,763  |
| 206053_at    | ZNF510          | 0,587 | 3,564  |
| 212228_s_at  | COQ9            | 0,587 | 2,729  |
| 214126_at    |                 | 0,587 | 2,869  |
| 218884_s_at  | GUF1            | 0,587 | 4,523  |
| 220357_s_at  | SGK2            | 0,587 | 2,455  |
| 238173_at    | TCEA2           | 0,587 | 3,941  |
| 242229_at    | NAPEPLD         | 0,587 | 3,737  |
| 1568448_at   |                 | 0,586 | 2,854  |
| 212401_s_at  | CDK11A///CDK11B | 0,586 | 4,049  |
| 238503_at    | CNIH3           | 0,586 | 3,73   |
| 1559351_at   |                 | 0,585 | 6,322  |
| 218260_at    | DDA1            | 0,585 | 2,571  |
| 223925_s_at  | MTPN            | 0,585 | 2,365  |
| 226135_at    | UHRF1BP1        | 0,585 | 3,351  |
| 226443_at    | FAM122A         | 0,585 | 3,868  |
| 229023_at    | SFT2D3          | 0,585 | 2,6    |
| 1556393_at   |                 | 0,584 | 6,674  |
| 220844_at    | TCEB3B          | 0,584 | 4,452  |
| 234195_at    | TNFRSF10C       | 0,584 | 2,393  |
| 236994_at    | FBXL4           | 0,584 | 2,681  |
| 244571_s_at  | TTC12           | 0,584 | 4,585  |
| 1566555_at   | BAIAP2-AS1      | 0,583 | 4,15   |
| 206465_at    | ACSBG1          | 0,583 | 5,026  |
| 212882_at    | KLHL18          | 0,583 | 3,826  |
| 218539_at    | FBXO34          | 0,583 | 2,733  |
| 218768_at    | NUP107          | 0,583 | 3,961  |



Tabelle1

|              |               |       |        |
|--------------|---------------|-------|--------|
| 219402_s_at  | DERL1         | 0,583 | 3,146  |
| 1561309_x_at | LOC105372550  | 0,582 | 7,675  |
| 209222_s_at  | OSBPL2        | 0,582 | 4,101  |
| 221904_at    | FAM131A       | 0,582 | 2,484  |
| 231752_at    | NPBWR1        | 0,582 | 30,398 |
| 231808_at    | OIP5-AS1      | 0,582 | 2,796  |
| 233999_s_at  | TTC26         | 0,582 | 3,267  |
| 201327_s_at  | CCT6A         | 0,581 | 3,801  |
| 208968_s_at  | CIAPIN1       | 0,581 | 5,285  |
| 212067_s_at  | C1R           | 0,581 | 2,992  |
| 215983_s_at  | UBXN8         | 0,581 | 2,572  |
| 238688_at    | TPM1          | 0,581 | 3,462  |
| 211754_s_at  | SLC25A17      | 0,58  | 2,763  |
| 217556_at    | CLCN4         | 0,58  | 11,31  |
| 226871_s_at  | ATG4D         | 0,58  | 3,376  |
| 227683_x_at  | NUDT4         | 0,58  | 2,255  |
| 229279_at    |               | 0,58  | 2,538  |
| 238072_at    | CLK3          | 0,58  | 3,516  |
| 239449_at    |               | 0,58  | 3,727  |
| 240243_at    |               | 0,58  | 5,322  |
| 1555127_at   | MOCS1         | 0,579 | 6,416  |
| 1566779_at   |               | 0,579 | 2,47   |
| 1566999_at   |               | 0,579 | 3,34   |
| 203098_at    | CDYL          | 0,579 | 2,503  |
| 215690_x_at  | GPAA1         | 0,579 | 3,764  |
| 241999_at    | SFXN5         | 0,579 | 3,723  |
| 210626_at    | AKAP1         | 0,578 | 3,625  |
| 226597_at    | REEP6         | 0,578 | 5,557  |
| 232069_at    | KIF26A        | 0,578 | 2,916  |
| 1555608_at   | CAPRIN2       | 0,577 | 13,302 |
| 209596_at    | MXRA5         | 0,577 | 4,911  |
| 212296_at    | PSMD14        | 0,577 | 2,564  |
| 222525_s_at  | CCDC25        | 0,577 | 2,704  |
| 227518_at    | SLC35E1       | 0,577 | 2,293  |
| 233938_at    | C11orf86      | 0,577 | 4,408  |
| 201173_x_at  | NUDC          | 0,576 | 3,36   |
| 201679_at    | SRRT          | 0,576 | 2,263  |
| 212724_at    | RND3          | 0,576 | 2,779  |
| 215660_s_at  | MAST2         | 0,576 | 3,001  |
| 226828_s_at  | HEYL          | 0,576 | 2,796  |
| 227414_at    | RHBDD1        | 0,576 | 2,188  |
| 238495_at    | LRRC57        | 0,576 | 5,055  |
| 1560916_a_at | DPY19L1       | 0,575 | 2,935  |
| 1562217_at   | LOC646383     | 0,575 | 4,788  |
| 206568_at    | TNP1          | 0,575 | 4,128  |
| 231673_at    | LOC105376997  | 0,575 | 4,557  |
| 208751_at    | NAPA          | 0,574 | 2,61   |
| 209078_s_at  | TXN2          | 0,574 | 5,875  |
| 224319_s_at  | MIEF1         | 0,574 | 2,62   |
| 91816_f_at   | MEX3D         | 0,574 | 2,286  |
| 1563427_at   | LOC101928031  | 0,573 | 4,953  |
| 201377_at    | UBAP2L        | 0,573 | 3,131  |
| 202776_at    | DNTTIP2       | 0,573 | 3,578  |
| 202960_s_at  | MUT           | 0,573 | 2,91   |
| 205066_s_at  | ENPP1         | 0,573 | 3,784  |
| 207105_s_at  | PIK3R2        | 0,573 | 3,525  |
| 207386_at    | CYP7B1        | 0,573 | 3,356  |
| 208366_at    | PCDH11X       | 0,573 | 5,546  |
| 212214_at    | OPA1          | 0,573 | 3,909  |
| 212740_at    | PIK3R4        | 0,573 | 5,045  |
| 212801_at    | MIR1178///CIT | 0,573 | 2,589  |
| 220238_s_at  | KLHL7         | 0,573 | 3,068  |
| 221817_at    | DOLPP1        | 0,573 | 2,46   |

Tabelle1

|              |                   |       |        |
|--------------|-------------------|-------|--------|
| 238242_at    | MIR8072///LOC1002 | 0,573 | 5,408  |
| 39817_s_at   | DNPB1             | 0,573 | 2,187  |
| 1556645_s_at | TNFRSF10B         | 0,572 | 4,297  |
| 213545_x_at  | SNX3              | 0,572 | 2,268  |
| 225376_at    | GID8              | 0,572 | 2,402  |
| 236436_at    | SLC25A45          | 0,572 | 2,902  |
| 236909_at    | CCDC173           | 0,572 | 4,414  |
| 211088_s_at  | PLK4              | 0,571 | 4,898  |
| 212525_s_at  | H2AFX             | 0,571 | 2,289  |
| 216186_at    |                   | 0,571 | 2,677  |
| 217381_s_at  | TARP              | 0,571 | 2,53   |
| 222613_at    | C12orf4           | 0,571 | 2,812  |
| 231017_at    | STK11             | 0,571 | 3,831  |
| 207887_s_at  | CALCR             | 0,57  | 5,071  |
| 213190_at    | COG7              | 0,57  | 2,802  |
| 216549_s_at  | TBC1D22B          | 0,57  | 3,175  |
| 233298_at    | CCDC169           | 0,57  | 3,449  |
| 240065_at    | FAM81B            | 0,57  | 5,156  |
| 201414_s_at  | NAP1L4            | 0,569 | 4,918  |
| 204727_at    | WDHD1             | 0,569 | 3,592  |
| 207158_at    | APOBEC1           | 0,569 | 2,578  |
| 210277_at    | AP4S1             | 0,569 | 2,357  |
| 213628_at    | CLCC1             | 0,569 | 2,462  |
| 221097_s_at  | KCNMB2            | 0,569 | 2,66   |
| 223480_s_at  | MRPL47            | 0,569 | 2,507  |
| 224871_at    | TPRG1L            | 0,569 | 2,655  |
| 231330_at    | LINC00445         | 0,569 | 8,334  |
| 238437_at    | ZNF805            | 0,569 | 2,493  |
| 1555388_s_at | SNX25             | 0,568 | 3,408  |
| 1557787_at   | LOC101929153      | 0,568 | 8,341  |
| 1564242_at   | TRPM2-AS          | 0,568 | 8,979  |
| 201306_s_at  | ANP32B            | 0,568 | 3,646  |
| 204853_at    | ORC2              | 0,568 | 3,139  |
| 206044_s_at  | KIAA1549///BRAF   | 0,568 | 2,827  |
| 206073_at    | COLQ              | 0,568 | 2,369  |
| 207983_s_at  | STAG2             | 0,568 | 2,526  |
| 209590_at    | BMP7              | 0,568 | 5,271  |
| 210864_x_at  | HFE               | 0,568 | 2,691  |
| 211969_at    | HSP90AA1          | 0,568 | 3,755  |
| 220083_x_at  | UCHL5             | 0,568 | 2,592  |
| 223037_at    | PDZD11            | 0,568 | 2,376  |
| 228126_x_at  | CTXN1             | 0,568 | 4,756  |
| 236686_at    | MVK               | 0,568 | 3,399  |
| 1552649_a_at | RAD51L3-RFFL///RI | 0,567 | 6,303  |
| 1553229_at   | ZNF572            | 0,567 | 11,075 |
| 206352_s_at  | PEX10             | 0,567 | 2,577  |
| 215533_s_at  | UBE4B             | 0,567 | 2,712  |
| 221668_s_at  | DNAI2             | 0,567 | 7,221  |
| 225544_at    | TBX3              | 0,567 | 3,386  |
| 232815_at    | FBXO3             | 0,567 | 6,184  |
| 237940_s_at  |                   | 0,567 | 2,3    |
| 1557016_a_at | LEXM              | 0,566 | 2,925  |
| 206845_s_at  | RNF40             | 0,566 | 4,806  |
| 211954_s_at  | IPO5              | 0,566 | 2,313  |
| 223865_at    | SOX6              | 0,566 | 9,042  |
| 240272_at    |                   | 0,566 | 6,204  |
| 1558881_at   | LINC00924         | 0,565 | 2,74   |
| 1560628_at   | LOC105369167      | 0,565 | 2,712  |
| 1567378_x_at | DNAH1             | 0,565 | 4,202  |
| 219357_at    | GTPBP1            | 0,565 | 3,056  |
| 226833_at    | CYB5D1            | 0,565 | 2,99   |
| 208393_s_at  | RAD50             | 0,564 | 2,336  |
| 215649_s_at  | MVK               | 0,564 | 6,343  |

Tabelle1

|              |                   |       |        |
|--------------|-------------------|-------|--------|
| 224294_at    | LOC100128185      | 0,564 | 2,182  |
| 225434_at    | DEDD2             | 0,564 | 2,228  |
| 230208_at    | HCN4              | 0,564 | 3,053  |
| 230483_at    |                   | 0,564 | 2,86   |
| 240624_x_at  |                   | 0,564 | 4,916  |
| 63305_at     | PKNX2             | 0,564 | 4,032  |
| 216235_s_at  | EDNRA             | 0,563 | 3,695  |
| 1554122_a_at | HSD17B12          | 0,562 | 4,928  |
| 213849_s_at  | PPP2R2B           | 0,562 | 2,45   |
| 224627_at    | GBA2              | 0,562 | 2,839  |
| 228334_x_at  | CEP44             | 0,562 | 2,269  |
| 228845_at    | PLBD2             | 0,562 | 2,794  |
| 231534_at    | CDK1              | 0,562 | 16,297 |
| 239680_at    | WDR76             | 0,562 | 2,945  |
| 212697_at    | FAM134C           | 0,561 | 3,385  |
| 220086_at    | IKZF5             | 0,561 | 2,362  |
| 221594_at    | RBM48             | 0,561 | 2,342  |
| 232036_at    | KLC1              | 0,561 | 3,262  |
| 244374_at    | TINCR             | 0,561 | 9,72   |
| 206451_at    | TBCCD1            | 0,56  | 2,9    |
| 220764_at    | PPP4R2            | 0,56  | 2,348  |
| 224117_at    | LOC284912///MB    | 0,56  | 6,832  |
| 1561738_at   |                   | 0,559 | 3,255  |
| 201931_at    | ETFA              | 0,559 | 2,339  |
| 207379_at    | EDIL3             | 0,559 | 6,809  |
| 223907_s_at  | PINX1             | 0,559 | 2,499  |
| 237410_x_at  |                   | 0,559 | 2,851  |
| 240081_at    |                   | 0,559 | 6,889  |
| 206117_at    | TPM1              | 0,558 | 13,013 |
| 206151_x_at  | CELA3B            | 0,558 | 4,046  |
| 215113_s_at  | SENP3-EIF4A1///SE | 0,558 | 2,947  |
| 224756_s_at  | ABHD16A           | 0,558 | 4,251  |
| 232806_s_at  | FAM131A           | 0,558 | 2,323  |
| 237380_at    |                   | 0,558 | 3,782  |
| 1559806_at   |                   | 0,557 | 2,214  |
| 202033_s_at  | RB1CC1            | 0,557 | 2,565  |
| 202750_s_at  | TFIP11            | 0,557 | 4,313  |
| 217722_s_at  | NGRN              | 0,557 | 3,037  |
| 218330_s_at  | NAV2              | 0,557 | 4,035  |
| 224206_x_at  | MYNN              | 0,557 | 4,775  |
| 37425_g_at   | CCHCR1            | 0,557 | 2,377  |
| 229807_s_at  |                   | 0,556 | 2,417  |
| 238955_at    | RFTN2             | 0,556 | 2,293  |
| 211955_at    | IPO5              | 0,555 | 2,389  |
| 212825_at    | PAXIP1            | 0,555 | 4,186  |
| 219037_at    | RRP15             | 0,555 | 2,497  |
| 1556413_a_at |                   | 0,554 | 2,502  |
| 1563691_at   | LOC285300         | 0,554 | 2,615  |
| 212816_s_at  | CBS               | 0,554 | 6,738  |
| 228165_at    | PIANP             | 0,554 | 3,671  |
| 229612_at    |                   | 0,554 | 2,496  |
| 244388_at    |                   | 0,554 | 3,492  |
| 1557021_s_at | LOC100507250      | 0,553 | 4,144  |
| 1563480_at   |                   | 0,553 | 3,897  |
| 1563521_at   | MOB3B             | 0,553 | 2,385  |
| 215497_s_at  | WDTC1             | 0,553 | 2,531  |
| 220708_at    |                   | 0,553 | 2,405  |
| 228931_at    | COQ4              | 0,553 | 2,75   |
| 231268_at    | MYBL1             | 0,553 | 4,741  |
| 238691_at    | SCARNA13///SNHG   | 0,553 | 14,595 |
| 200844_s_at  | PRDX6             | 0,552 | 2,54   |
| 201546_at    | TRIP12            | 0,552 | 3,853  |
| 212760_at    | UBR2              | 0,552 | 3,007  |

Tabelle1

|              |              |       |        |
|--------------|--------------|-------|--------|
| 215832_x_at  | PICALM       | 0,552 | 3,747  |
| 218374_s_at  | C12orf4      | 0,552 | 5,261  |
| 222569_at    | UGGT1        | 0,552 | 4,543  |
| 222852_at    | C10orf88     | 0,552 | 2,766  |
| 228330_at    | ZUFSP        | 0,552 | 2,948  |
| 229685_at    | LOC100134937 | 0,552 | 2,84   |
| 229950_s_at  | BORCS6       | 0,552 | 3,778  |
| 237848_at    | LOC100996671 | 0,552 | 3,7    |
| 201229_s_at  | ARIH2        | 0,551 | 4,545  |
| 203856_at    | VRK1         | 0,551 | 2,252  |
| 218448_at    | GID8         | 0,551 | 4,887  |
| 221537_at    | PLXNA1       | 0,551 | 2,311  |
| 235507_at    | PCMTD1       | 0,551 | 2,784  |
| 34063_at     | RECQL5       | 0,551 | 2,937  |
| 1553849_at   | CCDC26       | 0,55  | 2,228  |
| 1559405_a_at | TRPV6        | 0,55  | 2,935  |
| 211136_s_at  | CLPTM1       | 0,55  | 2,954  |
| 226536_at    | NSMCE2       | 0,55  | 2,976  |
| 228698_at    | SOX7         | 0,55  | 5,25   |
| 236052_at    | TRNP1        | 0,55  | 3,666  |
| 239248_at    | SDCBP2-AS1   | 0,55  | 2,716  |
| 210318_at    | RBP3         | 0,549 | 5,272  |
| 215531_s_at  | GABRA5       | 0,549 | 2,71   |
| 219004_s_at  | MIS18A       | 0,549 | 2,51   |
| 224415_s_at  | HINT2        | 0,549 | 2,69   |
| 201000_at    | AARS         | 0,548 | 3,08   |
| 214283_at    | TMEM97       | 0,548 | 2,528  |
| 231350_at    | LINC01350    | 0,548 | 12,032 |
| 240900_at    | C7orf50      | 0,548 | 2,182  |
| 1553101_a_at | ALKBH5       | 0,547 | 3,841  |
| 1554080_at   | CNOT9        | 0,547 | 2,788  |
| 200955_at    | IMMT         | 0,547 | 4,103  |
| 211092_s_at  | NF2          | 0,547 | 4,131  |
| 224467_s_at  | PDCD2L       | 0,547 | 2,666  |
| 225131_at    | ZRANB1       | 0,547 | 3,31   |
| 226892_at    | C10orf12     | 0,547 | 2,881  |
| 228811_at    |              | 0,547 | 3,014  |
| 229933_at    | C1orf74      | 0,547 | 2,214  |
| 1553914_at   | LOC162137    | 0,546 | 3,782  |
| 1555429_at   |              | 0,545 | 3,959  |
| 1570251_at   | HECTD1       | 0,545 | 3,864  |
| 202235_at    | SLC16A1      | 0,545 | 4,874  |
| 204459_at    | CSTF2        | 0,545 | 3,616  |
| 222638_s_at  | TMEM242      | 0,545 | 3,209  |
| 234381_at    |              | 0,545 | 2,704  |
| 238427_at    | GRPEL2       | 0,545 | 3,503  |
| 241933_at    | QRSL1        | 0,545 | 2,663  |
| 1555611_s_at | MBD1         | 0,544 | 4,108  |
| 204315_s_at  | GTSE1        | 0,544 | 2,407  |
| 229671_s_at  | MIS18A       | 0,544 | 2,204  |
| 238291_at    | UFL1         | 0,544 | 2,828  |
| 241015_at    |              | 0,544 | 2,189  |
| 241536_at    |              | 0,544 | 8,534  |
| 1552785_at   | ZNF781       | 0,543 | 2,446  |
| 210320_s_at  | DDX52        | 0,543 | 3,546  |
| 232219_x_at  | USP21        | 0,543 | 3,68   |
| 1559376_at   | ATP1A1-AS1   | 0,542 | 2,573  |
| 201525_at    | APOD         | 0,542 | 2,264  |
| 208625_s_at  | EIF4G1       | 0,542 | 3,968  |
| 214910_s_at  | APOM         | 0,542 | 2,555  |
| 1553237_x_at | PCDHAC1      | 0,541 | 3,413  |
| 1559577_at   | FCN2         | 0,541 | 2,728  |
| 202102_s_at  | BRD4         | 0,541 | 3,638  |

Tabelle1

|              |                   |       |        |
|--------------|-------------------|-------|--------|
| 207466_at    | GAL               | 0,541 | 2,199  |
| 208730_x_at  | RAB2A             | 0,541 | 2,954  |
| 217499_x_at  | OR7E37P           | 0,541 | 3,29   |
| 217685_at    |                   | 0,541 | 2,436  |
| 228232_s_at  | VSIG2             | 0,541 | 3,971  |
| 233205_at    | KCNMB2-AS1        | 0,541 | 2,448  |
| 1556163_a_at | IGSF3             | 0,54  | 3,134  |
| 224251_at    | CFAP43            | 0,54  | 13,72  |
| 229619_at    | FOLR2             | 0,54  | 4,164  |
| 231363_at    | LELP1             | 0,54  | 2,252  |
| 37004_at     | SFTPb             | 0,54  | 2,82   |
| 202404_s_at  | COL1A2            | 0,539 | 7,31   |
| 206184_at    | CRKL              | 0,539 | 3,667  |
| 215574_at    |                   | 0,539 | 5,949  |
| 219976_at    | HOOK1             | 0,539 | 9,434  |
| 223029_s_at  | TRAF7             | 0,539 | 2,26   |
| 231492_at    | LINC01523         | 0,539 | 3,973  |
| 234826_at    | LOC101930299///LC | 0,539 | 6,333  |
| 1556867_at   | LOC105372607      | 0,538 | 6,857  |
| 1555203_s_at | SLC44A4           | 0,537 | 17,544 |
| 1562240_at   | PLXNA4            | 0,537 | 10,558 |
| 211098_x_at  | TMCO1             | 0,537 | 2,493  |
| 211915_s_at  | TUBB7P            | 0,537 | 3,378  |
| 230044_at    | PCYT2             | 0,537 | 4,618  |
| 234401_at    |                   | 0,537 | 5,963  |
| 236570_at    | ZNF366            | 0,537 | 7,589  |
| 243368_at    |                   | 0,537 | 5,076  |
| 244761_at    | C5orf63           | 0,537 | 2,377  |
| 209132_s_at  | COMMD4            | 0,536 | 2,357  |
| 212258_s_at  | SMARCA2           | 0,536 | 3,338  |
| 215881_x_at  | SSX2B///SSX3///SS | 0,536 | 2,613  |
| 204682_at    | LTBP2             | 0,535 | 2,433  |
| 221224_s_at  | DCAKD             | 0,535 | 2,197  |
| 223728_at    | CENPBD1           | 0,535 | 2,542  |
| 229282_at    | GATA6             | 0,535 | 2,4    |
| 234397_at    |                   | 0,535 | 4,374  |
| 236515_at    |                   | 0,535 | 2,718  |
| 239138_at    | NAA50             | 0,535 | 4,406  |
| 207855_s_at  | CLCC1             | 0,534 | 2,19   |
| 225464_at    | FRMD6             | 0,534 | 2,283  |
| 202143_s_at  | COPS8             | 0,533 | 3,021  |
| 205957_at    | PLXNB3            | 0,533 | 3,92   |
| 207227_x_at  | RFPL2             | 0,533 | 2,346  |
| 222560_at    | LANCL2            | 0,533 | 3,529  |
| 235793_at    | TPGS2             | 0,533 | 2,365  |
| 236442_at    | DPF3              | 0,533 | 6,823  |
| 244537_at    |                   | 0,533 | 2,258  |
| 1552811_at   | WFIKK1            | 0,532 | 3,829  |
| 1556581_at   | ZNF778            | 0,532 | 3,069  |
| 205135_s_at  | NUFIP1            | 0,532 | 2,186  |
| 214826_at    | PDE12             | 0,532 | 2,868  |
| 217821_s_at  | WBP11             | 0,532 | 2,889  |
| 223128_at    | FOXRED1           | 0,532 | 2,757  |
| 231002_s_at  | RABEP1            | 0,532 | 2,533  |
| 234119_at    |                   | 0,532 | 4,328  |
| 237629_at    |                   | 0,532 | 2,79   |
| 242159_at    | LOC105369739      | 0,532 | 2,231  |
| 1555084_at   |                   | 0,531 | 3,493  |
| 200066_at    | IK                | 0,531 | 5,038  |
| 201435_s_at  | EIF4E             | 0,531 | 2,748  |
| 202188_at    | NUP93             | 0,531 | 2,6    |
| 207337_at    | CTAG2             | 0,531 | 2,421  |
| 214208_at    | KLHL35            | 0,531 | 4,451  |

Tabelle1

|              |                 |       |        |
|--------------|-----------------|-------|--------|
| 214858_at    | PP14571         | 0,531 | 3,125  |
| 1557122_s_at | GABRB2          | 0,53  | 3,556  |
| 202084_s_at  | SEC14L1         | 0,53  | 2,351  |
| 207274_at    | CHRNE           | 0,53  | 2,477  |
| 217127_at    | CTH             | 0,53  | 2,781  |
| 218399_s_at  | CDCA4           | 0,53  | 2,811  |
| 220543_at    | C21orf62        | 0,53  | 3,403  |
| 1554394_at   | NELL1           | 0,529 | 3,553  |
| 230473_s_at  | HMGB4           | 0,529 | 4,561  |
| 1565152_at   | LOC102724250    | 0,528 | 2,768  |
| 214634_at    | HIST1H4I        | 0,528 | 2,377  |
| 216190_x_at  | ITGB1           | 0,528 | 16,399 |
| 238571_at    | HOXA13          | 0,528 | 3,17   |
| 52078_at     | TMEM222         | 0,528 | 3,071  |
| 200976_s_at  | TAX1BP1         | 0,527 | 2,474  |
| 202366_at    | ACADS           | 0,527 | 3,053  |
| 203462_x_at  | EIF3B           | 0,527 | 3,052  |
| 216010_x_at  | FUT3            | 0,527 | 2,808  |
| 218449_at    | UFSP2           | 0,527 | 2,529  |
| 1554894_a_at | PCBD2           | 0,526 | 2,642  |
| 208422_at    | MSR1            | 0,526 | 4,823  |
| 216593_s_at  | PIGC            | 0,526 | 2,75   |
| 1562794_at   |                 | 0,525 | 3,342  |
| 205556_at    | MSX2            | 0,525 | 28,105 |
| 209018_s_at  | PINK1           | 0,525 | 2,499  |
| 213072_at    | CYHR1           | 0,525 | 2,188  |
| 1552604_at   | LINC00308       | 0,524 | 2,2    |
| 1554712_a_at | GLYATL2         | 0,524 | 4,591  |
| 207070_at    | RGR             | 0,524 | 4,81   |
| 217094_s_at  | ITCH            | 0,524 | 3,236  |
| 217806_s_at  | POLDIP2         | 0,524 | 4,609  |
| 223123_s_at  | PITHD1          | 0,524 | 2,429  |
| 223293_at    | WDR24           | 0,524 | 2,558  |
| 241453_at    | PTK2            | 0,524 | 17,847 |
| 207325_x_at  | MAGEA1          | 0,523 | 3,682  |
| 228536_at    | PRMT9           | 0,523 | 3,231  |
| 237128_at    |                 | 0,523 | 2,753  |
| 244289_at    | ZNF300P1        | 0,523 | 3,894  |
| 1560213_at   | HCP5B           | 0,522 | 2,718  |
| 1563834_a_at | AKNAD1          | 0,522 | 2,993  |
| 206228_at    | PAX2            | 0,522 | 2,424  |
| 225719_s_at  | MRPL55          | 0,522 | 2,545  |
| 1554885_a_at | PRIM2B///PRIM2  | 0,521 | 2,269  |
| 1567252_at   | OR10D3          | 0,521 | 3,856  |
| 201002_s_at  | TMEM189-UBE2V1, | 0,521 | 2,98   |
| 205378_s_at  | ACHE            | 0,521 | 21,144 |
| 224220_x_at  | TRPC4           | 0,521 | 8,37   |
| 243334_at    | CACNA1D         | 0,521 | 2,909  |
| 78047_s_at   | MMP24-AS1       | 0,521 | 3,262  |
| 201717_at    | MRPL49          | 0,52  | 2,77   |
| 217490_at    |                 | 0,52  | 2,965  |
| 233384_at    |                 | 0,52  | 2,806  |
| 1553857_at   | IGSF22          | 0,519 | 2,928  |
| 1554886_a_at | MLXIP           | 0,519 | 6,889  |
| 205331_s_at  | REEP2           | 0,519 | 2,199  |
| 214383_x_at  | KLHDC3          | 0,519 | 2,489  |
| 217056_at    | YME1L1          | 0,519 | 3,429  |
| 221394_at    | TAAR2           | 0,519 | 3,913  |
| 222231_s_at  | LRRC59          | 0,519 | 2,79   |
| 223333_s_at  | ANGPTL4         | 0,519 | 3,756  |
| 224338_s_at  | RNF26           | 0,519 | 3,142  |
| 1554574_a_at | CYB5R3          | 0,518 | 3,677  |
| 213206_at    | GOSR2           | 0,518 | 2,298  |

Tabelle1

|              |                   |       |        |
|--------------|-------------------|-------|--------|
| 232560_at    | UROS              | 0,518 | 2,476  |
| 207592_s_at  | HCN2              | 0,517 | 5,833  |
| 207682_s_at  | KIF25             | 0,517 | 4,187  |
| 211501_s_at  | EIF3B             | 0,517 | 2,255  |
| 221981_s_at  | WDR59             | 0,517 | 4,818  |
| 222675_s_at  | BAIAP2L1          | 0,517 | 7,48   |
| 230533_at    | ZMYND8            | 0,517 | 2,688  |
| 234302_s_at  | ALKBH5            | 0,517 | 3,992  |
| 240167_at    | LINC01085         | 0,517 | 3,203  |
| 244427_at    | KIF23             | 0,517 | 5,937  |
| 1553340_s_at | SLC35G4///SLC35G  | 0,516 | 3,407  |
| 1562723_at   |                   | 0,516 | 2,828  |
| 202141_s_at  | COPS8             | 0,516 | 3,428  |
| 214328_s_at  | HSP90AA1          | 0,516 | 5,219  |
| 222379_at    | KCNE4             | 0,516 | 4,309  |
| 227950_at    | UBE2H             | 0,516 | 2,641  |
| 236987_at    | ALPK2             | 0,516 | 2,242  |
| 207653_at    | FOXD2             | 0,515 | 7,412  |
| 227190_at    | TMEM37            | 0,515 | 4,774  |
| 229208_at    | HAUS2             | 0,515 | 3,236  |
| 234133_s_at  | TMEM116           | 0,515 | 2,969  |
| 240377_at    | LOC101930075///LC | 0,515 | 6,034  |
| 244796_at    |                   | 0,515 | 3,62   |
| 1563830_a_at | FHAD1             | 0,514 | 2,829  |
| 1565610_at   | LOC100287290      | 0,514 | 2,462  |
| 207954_at    | GATA2             | 0,514 | 2,227  |
| 217959_s_at  | MIR3656///TRAPPC  | 0,514 | 2,617  |
| 235972_at    | TMEM131           | 0,514 | 2,273  |
| 243669_s_at  | PRAP1             | 0,514 | 2,959  |
| 202520_s_at  | MLH1              | 0,513 | 4,386  |
| 204113_at    | CELF1             | 0,513 | 2,525  |
| 211046_at    | KCNH6             | 0,513 | 5,429  |
| 242581_at    | MAP3K15           | 0,513 | 6,505  |
| 205115_s_at  | RBM19             | 0,512 | 2,767  |
| 209820_s_at  | TBL3              | 0,512 | 3,27   |
| 213139_at    | SNAI2             | 0,512 | 13,427 |
| 216091_s_at  | BTRC              | 0,512 | 2,269  |
| 243507_s_at  | C20orf196         | 0,512 | 2,764  |
| 202092_s_at  | ARL2BP            | 0,511 | 3,567  |
| 206550_s_at  | NUP155            | 0,511 | 3,321  |
| 215357_s_at  | POLDIP3           | 0,511 | 3,068  |
| 225083_at    | GTF3C6            | 0,511 | 3,193  |
| 243374_x_at  |                   | 0,511 | 2,304  |
| 1560942_at   | PGD               | 0,51  | 3,132  |
| 215093_at    | NSDHL             | 0,51  | 3,519  |
| 230417_at    | GALNT16           | 0,51  | 2,401  |
| 234229_at    |                   | 0,51  | 5,754  |
| 241075_at    | RIMKLA            | 0,51  | 2,234  |
| 1561631_at   |                   | 0,509 | 3,134  |
| 220198_s_at  | EIF5A2            | 0,509 | 9,595  |
| 230844_at    | LOC440934         | 0,509 | 2,689  |
| 235440_at    | SPTY2D1           | 0,509 | 2,31   |
| 236261_at    | OSBPL6            | 0,509 | 4,914  |
| 242767_at    | LMCD1             | 0,509 | 2,955  |
| 244637_at    |                   | 0,509 | 2,444  |
| 1556086_at   | HPF1              | 0,508 | 7,562  |
| 1557000_at   | ESPNL             | 0,508 | 3,451  |
| 209000_s_at  | SEPT8             | 0,508 | 4,835  |
| 209571_at    | CIR1              | 0,508 | 2,229  |
| 213905_x_at  | BGN               | 0,508 | 12,295 |
| 218407_x_at  | NENF              | 0,508 | 2,559  |
| 222991_s_at  | UBQLN1            | 0,508 | 2,992  |
| 237602_at    |                   | 0,508 | 3,239  |

Tabelle1

|              |                   |       |        |
|--------------|-------------------|-------|--------|
| 219635_at    | ZNF606            | 0,507 | 2,57   |
| 230460_at    | MYLK-AS1          | 0,507 | 4,141  |
| 234206_at    |                   | 0,507 | 2,987  |
| 209842_at    | SOX10             | 0,506 | 2,452  |
| 230905_at    |                   | 0,506 | 2,751  |
| 234617_at    | OR52D1            | 0,506 | 2,303  |
| 201436_at    | EIF4E             | 0,505 | 2,399  |
| 214210_at    | SLC25A17          | 0,505 | 2,589  |
| 217769_s_at  | POMP              | 0,505 | 2,265  |
| 224782_at    | ZMAT2             | 0,505 | 2,878  |
| 229150_at    |                   | 0,505 | 4,297  |
| 236638_at    | AMER3             | 0,505 | 3,431  |
| 57703_at     | SENP5             | 0,505 | 2,544  |
| 210848_at    |                   | 0,504 | 2,844  |
| 211867_s_at  | PCDHA10           | 0,504 | 4,591  |
| 214592_s_at  | SNAPC5            | 0,504 | 8,732  |
| 215773_x_at  | PARP2             | 0,504 | 3,359  |
| 237861_at    |                   | 0,504 | 2,278  |
| 241059_at    |                   | 0,504 | 4,25   |
| 243975_at    |                   | 0,504 | 2,228  |
| 1567054_at   | OR1C1             | 0,503 | 2,645  |
| 207041_at    | MASP2             | 0,503 | 3,446  |
| 207304_at    | ZNF45             | 0,503 | 2,72   |
| 238927_at    |                   | 0,503 | 2,219  |
| 228201_at    | ARL13B            | 0,502 | 2,223  |
| 228413_s_at  | SFRP1             | 0,502 | 2,874  |
| 1566101_at   | TTLL5             | 0,501 | 3,734  |
| 200607_s_at  | RAD21             | 0,501 | 3,361  |
| 219216_at    | ETAA1             | 0,501 | 2,239  |
| 242199_at    | LOC101928812      | 0,501 | 2,813  |
| 242478_at    |                   | 0,501 | 4,904  |
| 203829_at    | ELP4              | 0,5   | 2,305  |
| 233032_x_at  |                   | 0,5   | 6,507  |
| 235710_at    | VPS53             | 0,5   | 6,286  |
| 222643_s_at  | BBS1              | 0,499 | 2,274  |
| 224955_at    | TEAD1             | 0,499 | 4,705  |
| 234429_at    | LOC101930476//LII | 0,499 | 11,715 |
| 235209_at    | SBSPON            | 0,499 | 3,155  |
| 241160_at    |                   | 0,499 | 14,667 |
| 243856_at    | LANCL3            | 0,499 | 2,885  |
| 1557697_at   |                   | 0,498 | 2,24   |
| 1559009_at   | LOC101928504      | 0,498 | 2,866  |
| 203738_at    | C5orf22           | 0,498 | 2,514  |
| 1553094_at   | FLJ45513//TAC4    | 0,497 | 3,507  |
| 203486_s_at  | ARMC8             | 0,497 | 2,522  |
| 217405_x_at  | GPLD1             | 0,497 | 2,363  |
| 219007_at    | NUP43             | 0,497 | 2,38   |
| 219949_at    | LRRC2             | 0,497 | 10,315 |
| 224199_at    | DKK2              | 0,497 | 3,807  |
| 1558758_s_at | C12orf49          | 0,496 | 3,181  |
| 214776_x_at  | XYLB              | 0,496 | 5,606  |
| 223042_s_at  | FUNDC2            | 0,496 | 2,498  |
| 230385_at    | MARCH3            | 0,496 | 3,963  |
| 1568723_at   | ATP9B             | 0,495 | 2,565  |
| 210617_at    | PHEX              | 0,495 | 3,858  |
| 220119_at    | EPB41L4A          | 0,495 | 3,485  |
| 221998_s_at  | VRK3              | 0,495 | 2,388  |
| 200930_s_at  | VCL               | 0,494 | 3,222  |
| 227942_s_at  | CRIPT             | 0,494 | 2,273  |
| 230990_at    | KIF13A            | 0,494 | 3,463  |
| 202249_s_at  | DCAF8             | 0,493 | 3,264  |
| 211129_x_at  | EDA               | 0,493 | 4,975  |
| 1563557_at   |                   | 0,492 | 5,265  |



Tabelle1

|              |                   |       |        |
|--------------|-------------------|-------|--------|
| 203934_at    | KDR               | 0,492 | 3,043  |
| 205886_at    | REG1B             | 0,492 | 7,43   |
| 214067_at    | TSR3              | 0,492 | 5,797  |
| 215425_at    | BTG3              | 0,492 | 3,796  |
| 222575_at    | SETD5             | 0,492 | 2,423  |
| 238247_at    | TMC3-AS1          | 0,492 | 2,22   |
| 239078_at    | BROX              | 0,492 | 5,355  |
| 242731_x_at  | BMPR1A            | 0,492 | 6,923  |
| 32836_at     | AGPAT1            | 0,492 | 4,678  |
| 52741_at     | TRMT61A           | 0,492 | 2,404  |
| 203772_at    | BLVRA             | 0,491 | 2,466  |
| 205265_s_at  | LOC100996693///SF | 0,491 | 4,14   |
| 213818_x_at  | TMEM223           | 0,491 | 3,725  |
| 219319_at    | HIF3A             | 0,491 | 6,213  |
| 221708_s_at  | UNC45A            | 0,491 | 3,958  |
| 222886_at    | NSUN3             | 0,491 | 2,484  |
| 225623_at    | CIPC              | 0,491 | 2,319  |
| 227207_x_at  | ZNF213            | 0,491 | 2,581  |
| 234347_s_at  | DENR              | 0,491 | 3,107  |
| 244483_at    |                   | 0,491 | 4,459  |
| 1552378_s_at | RDH10             | 0,49  | 10,124 |
| 1558034_s_at | CP                | 0,49  | 2,989  |
| 1561288_at   | LINC00536         | 0,49  | 2,935  |
| 202128_at    | AREL1             | 0,49  | 3,204  |
| 203247_s_at  | ZNF24             | 0,49  | 3,314  |
| 220163_s_at  | HR                | 0,49  | 2,248  |
| 221518_s_at  | USP47             | 0,49  | 4,051  |
| 224886_at    | JMJD8             | 0,49  | 3,842  |
| 242639_at    | ICE2              | 0,49  | 2,24   |
| 244401_at    | LCA5              | 0,49  | 2,213  |
| 1552868_at   | CIRBP-AS1         | 0,489 | 2,278  |
| 1553442_a_at | CNTNAP4           | 0,489 | 4,824  |
| 217706_at    |                   | 0,489 | 2,25   |
| 222335_at    |                   | 0,489 | 3,601  |
| 223540_at    | NECTIN4           | 0,489 | 2,857  |
| 233155_at    | UPP2              | 0,489 | 4,043  |
| 207590_s_at  | CENPI             | 0,488 | 8,654  |
| 211009_s_at  | ZNF271P           | 0,488 | 2,702  |
| 232674_at    | UCN2              | 0,488 | 4,285  |
| 36865_at     | ANGEL1            | 0,488 | 2,543  |
| 1569208_a_at |                   | 0,487 | 2,643  |
| 202597_at    | IRF6              | 0,487 | 2,658  |
| 210557_x_at  | CSF1              | 0,487 | 2,698  |
| 213948_x_at  | CADM3             | 0,487 | 7,099  |
| 218939_at    | LETM1             | 0,487 | 2,411  |
| 209918_at    | GGTLC2            | 0,486 | 2,234  |
| 216397_s_at  | MIR7112///BOP1    | 0,486 | 3,25   |
| 217548_at    | ARPIN             | 0,486 | 2,331  |
| 233781_s_at  | RIF1              | 0,486 | 2,426  |
| 244249_at    |                   | 0,486 | 3,617  |
| 1560087_a_at |                   | 0,485 | 4,611  |
| 1560865_a_at |                   | 0,485 | 2,981  |
| 1566474_at   |                   | 0,485 | 2,344  |
| 1568913_at   | NSUN3             | 0,485 | 2,508  |
| 210552_s_at  | RALGPS1           | 0,485 | 2,829  |
| 213570_at    | EIF4E2            | 0,485 | 2,386  |
| 215935_at    | SPATA31A5///SPAT  | 0,485 | 2,246  |
| 224293_at    | TTY10             | 0,485 | 2,576  |
| 236479_at    |                   | 0,485 | 2,32   |
| 1553335_x_at | LOC285696         | 0,484 | 2,84   |
| 207388_s_at  | PTGES             | 0,484 | 2,625  |
| 210912_x_at  | GSTM4             | 0,484 | 2,731  |
| 230347_at    | ORAI2             | 0,484 | 2,204  |

Tabelle1

|             |                   |       |        |
|-------------|-------------------|-------|--------|
| 236312_at   | MAD2L1            | 0,484 | 3,825  |
| 237474_at   |                   | 0,484 | 14,238 |
| 239463_at   |                   | 0,484 | 2,296  |
| 241061_at   |                   | 0,484 | 3,687  |
| 208688_x_at | EIF3B             | 0,483 | 2,768  |
| 217055_x_at | SLC1A2            | 0,483 | 11,398 |
| 233979_s_at | ESPN              | 0,483 | 9,652  |
| 234735_s_at | USP21             | 0,483 | 2,987  |
| 241599_at   | LSM11             | 0,483 | 2,552  |
| 242873_at   | LOC101928100      | 0,483 | 4,657  |
| 1554203_at  | GRIK1-AS1         | 0,482 | 4,384  |
| 202250_s_at | DCAF8             | 0,482 | 2,308  |
| 210159_s_at | TRIM31            | 0,482 | 3,894  |
| 1552615_at  | ACACB             | 0,481 | 2,403  |
| 1562724_at  | LOC286114         | 0,481 | 4,518  |
| 210492_at   | MFAP3L            | 0,481 | 4,119  |
| 218245_at   | TSKU              | 0,481 | 3,008  |
| 220682_s_at | KLHL5             | 0,481 | 3,422  |
| 222987_s_at | TMEM9             | 0,481 | 3,13   |
| 226378_s_at | C19orf25          | 0,481 | 2,218  |
| 203093_s_at | TIMM44            | 0,48  | 2,607  |
| 223370_at   | PLEKHA3           | 0,48  | 3,686  |
| 1569402_at  | MEIS3             | 0,479 | 3,3    |
| 206003_at   | CEP135            | 0,479 | 2,407  |
| 229181_s_at | HAUS2             | 0,479 | 3,417  |
| 201758_at   | TSG101            | 0,478 | 2,395  |
| 202042_at   | LOC101928623///H/ | 0,478 | 4,493  |
| 202420_s_at | DHX9              | 0,478 | 3,121  |
| 202550_s_at | VAPB              | 0,478 | 3,822  |
| 212213_x_at | OPA1              | 0,478 | 3,838  |
| 218187_s_at | C8orf33           | 0,478 | 2,346  |
| 37232_at    | KIAA0586          | 0,478 | 4,044  |
| 200802_at   | SARS              | 0,477 | 2,861  |
| 201097_s_at | ARF4              | 0,477 | 2,968  |
| 207071_s_at | ACO1              | 0,477 | 2,768  |
| 210505_at   | ADH7              | 0,477 | 3,995  |
| 240158_at   |                   | 0,477 | 2,576  |
| 215329_s_at | CDK11A///CDK11B   | 0,476 | 2,306  |
| 218594_at   | HEATR1            | 0,476 | 2,815  |
| 233634_at   | MARVELD3          | 0,476 | 6,908  |
| 235573_at   | HSPH1             | 0,476 | 2,2    |
| 1556064_at  | LOC284926         | 0,475 | 2,297  |
| 212075_s_at | CSNK2A1           | 0,475 | 3,073  |
| 227562_at   | LAMTOR3           | 0,475 | 2,421  |
| 243255_at   |                   | 0,475 | 3,65   |
| 201615_x_at | CALD1             | 0,474 | 12,19  |
| 223121_s_at | SFRP2             | 0,474 | 8,162  |
| 225926_at   | VTI1B             | 0,474 | 2,254  |
| 237254_at   | SLC5A11           | 0,474 | 4,043  |
| 206942_s_at | PMCH              | 0,473 | 7,039  |
| 219769_at   | INCENP            | 0,473 | 2,268  |
| 239246_at   | FARP1             | 0,473 | 3,082  |
| 239414_at   |                   | 0,473 | 3,545  |
| 242534_at   | EVI5L             | 0,473 | 6,628  |
| 243309_at   | C15orf65          | 0,473 | 4,892  |
| 201253_s_at | CDIPT             | 0,471 | 2,79   |
| 203436_at   | RPP30             | 0,471 | 2,299  |
| 237897_at   | IAH1              | 0,471 | 2,764  |
| 210689_at   | CLDN14            | 0,47  | 2,575  |
| 212058_at   | U2SURP            | 0,47  | 3,439  |
| 217836_s_at | YY1AP1            | 0,47  | 3,545  |
| 221702_s_at | TM2D3             | 0,47  | 2,339  |
| 228445_at   | AIFM2             | 0,47  | 2,218  |

Tabelle1

|              |                   |       |        |
|--------------|-------------------|-------|--------|
| 211016_x_at  | HSPA4             | 0,469 | 2,511  |
| 231605_at    |                   | 0,469 | 2,871  |
| 232611_at    | GOLGA2P5          | 0,469 | 3,838  |
| 236300_at    | PDE3A             | 0,469 | 2,482  |
| 1569983_at   | LINC00566         | 0,468 | 4,431  |
| 208369_s_at  | GCDH              | 0,468 | 2,33   |
| 222283_at    | ZNF480            | 0,468 | 2,423  |
| 224390_s_at  | RGS8              | 0,468 | 3,151  |
| 228059_x_at  | MRPS22            | 0,468 | 2,307  |
| 1556117_at   | LINC01260         | 0,467 | 3,272  |
| 200718_s_at  | SKP1              | 0,467 | 2,847  |
| 209620_s_at  | ABCB7             | 0,467 | 2,41   |
| 216434_at    | TTC38             | 0,467 | 6,054  |
| 222140_s_at  | GPR89A///GPR89B   | 0,467 | 2,248  |
| 238966_at    | CELF4             | 0,467 | 4,084  |
| 1570302_at   |                   | 0,466 | 3,422  |
| 204752_x_at  | PARP2             | 0,466 | 3,359  |
| 206677_at    | KRT31             | 0,466 | 2,685  |
| 1553254_at   | MAGEE2            | 0,465 | 5,767  |
| 1557557_at   | MATN1-AS1         | 0,465 | 3,44   |
| 202618_s_at  | MECP2             | 0,465 | 2,563  |
| 214133_at    | MUC6              | 0,465 | 3,399  |
| 216725_at    | DCLK2             | 0,465 | 6,138  |
| 225442_at    | DDR2              | 0,465 | 5,246  |
| 231458_at    | LINC00658         | 0,465 | 5,974  |
| 1566823_a_at |                   | 0,464 | 2,206  |
| 203426_s_at  | IGFBP5            | 0,464 | 2,583  |
| 224459_at    | L2HGDH            | 0,464 | 2,933  |
| 239485_at    | CDH4              | 0,464 | 18,795 |
| 240489_at    |                   | 0,464 | 3,027  |
| 205631_at    | KIAA0586          | 0,463 | 2,467  |
| 229999_at    | LOC101928747///Rf | 0,463 | 3,318  |
| 233022_at    | TRPM3             | 0,463 | 4,816  |
| 236012_at    | PSMF1             | 0,463 | 2,852  |
| 237063_at    |                   | 0,463 | 5,469  |
| 222882_s_at  | BORCS6            | 0,462 | 4,179  |
| 227250_at    | KREMEN1           | 0,462 | 4,864  |
| 231224_x_at  | PRKAG2            | 0,462 | 2,224  |
| 231943_at    | ZFP28             | 0,462 | 2,55   |
| 241850_at    |                   | 0,462 | 3,43   |
| 1558050_at   | EIF2B5            | 0,461 | 2,31   |
| 1566965_at   |                   | 0,461 | 2,344  |
| 216507_at    | TAPT1             | 0,461 | 3,758  |
| 223933_at    | KIF5A             | 0,461 | 3,74   |
| 227451_s_at  | MCUR1             | 0,461 | 2,279  |
| 230662_at    | RNF187            | 0,461 | 4,66   |
| 233922_at    |                   | 0,461 | 4,05   |
| 234197_at    | ACSM1             | 0,461 | 2,822  |
| 243862_at    | RASEF             | 0,461 | 4,851  |
| 1559997_x_at | SAMD14            | 0,46  | 3,879  |
| 213820_s_at  | STARD5            | 0,46  | 5,035  |
| 232698_at    | BPIFB2            | 0,46  | 2,934  |
| 241165_at    |                   | 0,46  | 3,637  |
| 241329_s_at  |                   | 0,46  | 2,308  |
| 1560918_at   |                   | 0,459 | 7,757  |
| 1561320_at   |                   | 0,459 | 2,488  |
| 204591_at    | CHL1              | 0,459 | 7,086  |
| 206328_at    | CDH15             | 0,459 | 3,637  |
| 214073_at    | CTTN              | 0,459 | 15,277 |
| 241115_at    |                   | 0,459 | 4,528  |
| 1562074_a_at | UNC13C            | 0,458 | 2,698  |
| 208628_s_at  | YBX1              | 0,458 | 3,335  |
| 238871_at    | AFDN              | 0,458 | 3,714  |

Tabelle1

|              |                  |       |        |
|--------------|------------------|-------|--------|
| 243793_at    | AHDC1            | 0,458 | 2,759  |
| 1568789_at   | UHRF1BP1         | 0,457 | 3,362  |
| 201261_x_at  | BGN              | 0,457 | 3,056  |
| 202272_s_at  | FBXO28           | 0,457 | 2,641  |
| 208815_x_at  | HSPA4            | 0,457 | 2,895  |
| 218065_s_at  | TMEM9B           | 0,457 | 2,376  |
| 233704_at    |                  | 0,457 | 16,168 |
| 239312_at    |                  | 0,457 | 5,897  |
| 243299_at    |                  | 0,457 | 2,288  |
| 242351_at    |                  | 0,456 | 2,664  |
| 1553686_at   | C18orf25         | 0,455 | 3,322  |
| 214566_at    | SMR3A            | 0,455 | 4,201  |
| 1563260_at   | LINC00587        | 0,454 | 7,067  |
| 1570454_at   | EIF4EBP2         | 0,454 | 4,042  |
| 201794_s_at  | SMG7             | 0,454 | 2,805  |
| 234815_at    | MYCN             | 0,454 | 8,763  |
| 238733_at    | MDM2             | 0,454 | 2,828  |
| 240210_at    | ATAD3C           | 0,454 | 2,805  |
| 244891_x_at  |                  | 0,454 | 3,38   |
| 1555738_at   | CMTM1            | 0,453 | 3,375  |
| 1557664_at   | LOC101929114     | 0,453 | 2,631  |
| 201390_s_at  | CSNK2B           | 0,453 | 2,849  |
| 217314_at    |                  | 0,453 | 17,409 |
| 217681_at    | WNT7B            | 0,453 | 11,813 |
| 231778_at    | DLX3             | 0,453 | 3,47   |
| 243044_at    |                  | 0,453 | 3,105  |
| 1565722_at   | LOC100128281     | 0,452 | 2,31   |
| 207659_s_at  | MOBP             | 0,452 | 2,687  |
| 234232_at    |                  | 0,452 | 3,218  |
| 208472_at    | IKZF4            | 0,451 | 2,422  |
| 215979_s_at  | SLC7A1           | 0,451 | 3,555  |
| 229275_at    | IGFN1            | 0,451 | 3,235  |
| 234766_at    | OR8D2            | 0,451 | 6,212  |
| 1552532_a_at | ATP6V1C2         | 0,45  | 9,76   |
| 1554471_a_at | ANKRD13C         | 0,45  | 4,212  |
| 213412_at    | TJP3             | 0,45  | 9,535  |
| 222924_at    | SLMAP            | 0,45  | 2,529  |
| 236959_s_at  |                  | 0,45  | 2,313  |
| 237142_at    | PPARA            | 0,45  | 3,281  |
| 1561545_at   | EPN2-AS1         | 0,449 | 2,807  |
| 217124_at    | IQCE             | 0,449 | 2,25   |
| 217514_at    | ST8SIA5          | 0,449 | 2,347  |
| 224960_at    | SCYL2            | 0,449 | 3,286  |
| 238616_at    | QDPR             | 0,449 | 3,208  |
| 243848_at    |                  | 0,449 | 2,356  |
| 1554500_a_at | RGS7             | 0,448 | 8,79   |
| 1563571_at   | CTBP1-AS         | 0,448 | 3,278  |
| 212287_at    | SUZ12            | 0,448 | 2,847  |
| 219698_s_at  | METTL4           | 0,448 | 2,184  |
| 235699_at    | REM2             | 0,448 | 2,374  |
| 56821_at     | SLC38A7          | 0,448 | 2,266  |
| 1555049_at   | TSPEAR           | 0,447 | 3,005  |
| 1570471_at   | ARHGEF12         | 0,447 | 5,545  |
| 210493_s_at  | MFAP3L           | 0,447 | 3,812  |
| 214137_at    | PTPRJ            | 0,447 | 2,217  |
| 217972_at    | CHCHD3           | 0,447 | 2,75   |
| 220897_at    |                  | 0,447 | 3,035  |
| 225967_s_at  | C17orf89         | 0,447 | 2,483  |
| 229635_at    | LINC01094        | 0,447 | 3,494  |
| 241379_at    | APLF             | 0,447 | 2,82   |
| 215859_at    | NCLN             | 0,446 | 2,274  |
| 236350_at    |                  | 0,446 | 2,36   |
| 46167_at     | MROH7-TTC4///TTC | 0,446 | 2,697  |

Tabelle1

|              |                    |       |        |
|--------------|--------------------|-------|--------|
| 1556003_a_at | LOC101928817       | 0,445 | 2,686  |
| 206718_at    | LMO1               | 0,445 | 2,489  |
| 212643_at    | MAPK1IP1L          | 0,445 | 2,363  |
| 216885_s_at  | DCAF8              | 0,445 | 2,83   |
| 235497_at    | LINC01128          | 0,445 | 12,073 |
| 241608_at    |                    | 0,445 | 9,426  |
| 1565832_at   |                    | 0,444 | 8,277  |
| 208385_at    | NR2E3              | 0,444 | 5,051  |
| 218799_at    | GPN2               | 0,444 | 2,596  |
| 236623_at    | ATP1A1-AS1         | 0,444 | 3,771  |
| 242483_at    |                    | 0,444 | 8,11   |
| 228466_at    | GABPB2             | 0,443 | 3,086  |
| 230087_at    | PRIMA1             | 0,443 | 2,598  |
| 231365_at    | HOXA10-AS///MIR19  | 0,443 | 2,478  |
| 236531_at    | ZNF800             | 0,443 | 2,387  |
| 239025_at    |                    | 0,443 | 6,371  |
| 1555994_at   | DIAPH3-AS1         | 0,442 | 5,439  |
| 1566831_at   | SBF2-AS1           | 0,442 | 2,724  |
| 201498_at    | USP7               | 0,442 | 2,734  |
| 223435_s_at  | PCDHA1///PCDHA2    | 0,442 | 8,119  |
| 226128_at    | BROX               | 0,442 | 2,55   |
| 226487_at    | FAM222A            | 0,442 | 2,979  |
| 232157_at    | SPRY3              | 0,442 | 2,257  |
| 1552477_a_at | IRF6               | 0,441 | 38,33  |
| 209533_s_at  | PLAA               | 0,441 | 3,515  |
| 233918_at    | DCDC2B             | 0,441 | 3,572  |
| 234446_at    |                    | 0,441 | 4,27   |
| 1559429_a_at | SMCO1              | 0,44  | 2,566  |
| 1569157_s_at | LOC100505555///ZNF | 0,44  | 2,544  |
| 202936_s_at  | SOX9               | 0,44  | 2,329  |
| 211091_s_at  | NF2                | 0,44  | 2,448  |
| 223837_at    | GULP1              | 0,44  | 2,34   |
| 234371_at    |                    | 0,44  | 3,321  |
| 1554895_a_at | RHBDL2             | 0,439 | 4,879  |
| 220151_at    | C19orf73           | 0,439 | 2,636  |
| 225866_at    | RPF2               | 0,439 | 2,348  |
| 229358_at    | IHH                | 0,439 | 2,217  |
| 236204_at    | COPS8              | 0,439 | 2,813  |
| 65133_i_at   | INO80B-WBP1///INC  | 0,439 | 2,223  |
| 1560407_at   | MARK1              | 0,438 | 4,967  |
| 1562870_at   | LOC101929517       | 0,438 | 3,504  |
| 222961_at    | SERINC2            | 0,438 | 2,746  |
| 240040_at    | PSTK               | 0,438 | 4,755  |
| 1562524_at   | THSD4-AS1          | 0,437 | 3,011  |
| 201616_s_at  | CALD1              | 0,437 | 7,421  |
| 206322_at    | SYN3               | 0,437 | 3,896  |
| 211646_at    | LOC102725526///IG  | 0,437 | 2,354  |
| 216303_s_at  | MTMR1              | 0,437 | 5,137  |
| 222917_s_at  | TBX3               | 0,437 | 2,679  |
| 205154_at    | LRRN2              | 0,436 | 4,198  |
| 208264_s_at  | EIF3J              | 0,436 | 2,37   |
| 1569246_a_at | C8orf74            | 0,435 | 3,633  |
| 201228_s_at  | ARIH2              | 0,435 | 2,395  |
| 1558906_a_at | OSER1-AS1          | 0,434 | 2,604  |
| 1561006_at   |                    | 0,434 | 5,42   |
| 201419_at    | BAP1               | 0,434 | 2,93   |
| 219805_at    | CXorf56            | 0,434 | 2,465  |
| 237272_at    | CCDC37-AS1         | 0,434 | 3,184  |
| 218353_at    | RGS5               | 0,433 | 25,29  |
| 222484_s_at  | CXCL14             | 0,433 | 7,25   |
| 236177_s_at  |                    | 0,433 | 2,769  |
| 239044_at    | ITFG1              | 0,433 | 2,536  |
| 241337_at    | LOC101929465       | 0,433 | 4,725  |

Tabelle1

|              |                   |       |        |
|--------------|-------------------|-------|--------|
| 227436_at    | OTUD7B            | 0,432 | 2,348  |
| 242148_at    | BCL6B             | 0,432 | 5,099  |
| 1557513_a_at |                   | 0,431 | 2,756  |
| 233337_s_at  | SEZ6L2            | 0,431 | 2,698  |
| 239293_at    | NRSN1             | 0,431 | 4,965  |
| 207546_at    | ATP4B             | 0,429 | 5,162  |
| 210193_at    | MOBP              | 0,429 | 5,202  |
| 224745_x_at  | OTUD5             | 0,429 | 2,466  |
| 226929_at    | MTHFR             | 0,429 | 2,202  |
| 241822_at    | SIX5              | 0,429 | 2,716  |
| 1568856_at   | NBR1              | 0,428 | 3,054  |
| 210994_x_at  | TRIM23            | 0,428 | 2,964  |
| 212649_at    | DHX29             | 0,428 | 2,571  |
| 213579_s_at  | EP300             | 0,428 | 2,307  |
| 226664_at    | TBC1D20           | 0,428 | 3,291  |
| 234870_at    | TANC1             | 0,428 | 2,488  |
| 235790_at    | CTAGE5            | 0,428 | 3,38   |
| 239991_at    |                   | 0,428 | 17,675 |
| 40665_at     | FMO3              | 0,428 | 23,385 |
| 1554897_s_at | RHBDL2            | 0,427 | 2,318  |
| 201346_at    | ADIPOR2           | 0,427 | 3,012  |
| 204846_at    | CP                | 0,427 | 3,102  |
| 216408_at    | OR2B2             | 0,427 | 2,499  |
| 217386_at    |                   | 0,427 | 2,227  |
| 220845_at    | ACOXL             | 0,427 | 7,127  |
| 220928_s_at  | PRDM16            | 0,427 | 6,419  |
| 230457_at    | TMEM242           | 0,427 | 2,309  |
| 230801_at    | RPRD1B            | 0,427 | 3,33   |
| 231143_at    | TMEM178B          | 0,427 | 2,366  |
| 240251_at    | IFT80             | 0,427 | 3,694  |
| 244760_at    |                   | 0,427 | 4,035  |
| 203364_s_at  | ATG13             | 0,426 | 2,398  |
| 208302_at    | HMHB1             | 0,426 | 2,545  |
| 212108_at    | FAF2              | 0,426 | 2,424  |
| 228117_at    | LOC102723722///NI | 0,426 | 3,618  |
| 240031_at    | MSRA              | 0,426 | 2,33   |
| 242200_at    | ADAMTSL5          | 0,426 | 7,715  |
| 1555548_at   | NDUFA10           | 0,425 | 2,451  |
| 1555673_at   | KRTAP2-3///KRTAP  | 0,425 | 4,62   |
| 202583_s_at  | RANBP9            | 0,425 | 2,227  |
| 217410_at    | AGRN              | 0,425 | 2,374  |
| 236992_at    |                   | 0,425 | 3,065  |
| 1552605_s_at | LINC00308         | 0,424 | 3,383  |
| 1569805_at   | LOC101927274      | 0,424 | 3,553  |
| 1570153_at   | CCDC169           | 0,424 | 5,878  |
| 202199_s_at  | SRPK1             | 0,424 | 2,772  |
| 221018_s_at  | TDRD1             | 0,424 | 3,681  |
| 237570_x_at  |                   | 0,424 | 3,777  |
| 1554844_at   | EYA3              | 0,423 | 6,326  |
| 214672_at    | TTLL5             | 0,423 | 2,366  |
| 215844_at    | TNPO2             | 0,423 | 4,597  |
| 216992_s_at  | GRM8              | 0,423 | 2,868  |
| 230054_at    | LOC100507547///PF | 0,423 | 3,279  |
| 233412_x_at  |                   | 0,423 | 3,323  |
| 233987_at    | TFAP2D            | 0,423 | 3,926  |
| 234454_at    |                   | 0,423 | 6,752  |
| 205273_s_at  | PITRM1            | 0,422 | 2,262  |
| 209418_s_at  | THOC5             | 0,422 | 2,917  |
| 218367_x_at  | USP21             | 0,422 | 2,33   |
| 219747_at    | NDNF              | 0,422 | 2,73   |
| 1559000_at   | PRR26             | 0,421 | 2,993  |
| 1560339_s_at | NAP1L4            | 0,421 | 2,614  |
| 1569564_at   |                   | 0,421 | 3,019  |

Tabelle1

|              |                   |       |       |
|--------------|-------------------|-------|-------|
| 201705_at    | PSMD7             | 0,421 | 2,543 |
| 216219_at    | AQP6              | 0,421 | 2,303 |
| 226976_at    | KPNA6             | 0,421 | 2,623 |
| 234948_at    | SLC27A5           | 0,421 | 2,817 |
| 1570344_at   | LRPPRC            | 0,42  | 33,49 |
| 204031_s_at  | PCBP2             | 0,42  | 2,981 |
| 220364_at    | EPB41L4A-AS2      | 0,42  | 2,261 |
| 237918_at    |                   | 0,42  | 3,081 |
| 237994_at    |                   | 0,42  | 2,456 |
| 1559393_at   | ALDH1L2           | 0,419 | 2,591 |
| 201684_s_at  | TOX4              | 0,419 | 4,321 |
| 202521_at    | CTCF              | 0,419 | 3,684 |
| 206556_at    | CLUL1             | 0,419 | 7,533 |
| 207033_at    | GIF               | 0,419 | 4,888 |
| 215478_at    | RIMS2             | 0,419 | 2,534 |
| 233145_at    | CSMD2             | 0,419 | 3,02  |
| 237204_at    |                   | 0,419 | 2,33  |
| 243137_at    |                   | 0,419 | 2,417 |
| 223958_s_at  | DNAL1             | 0,418 | 3,551 |
| 243369_at    |                   | 0,418 | 3,657 |
| 204845_s_at  | ENPEP             | 0,417 | 5,553 |
| 207303_at    | PDE1C             | 0,417 | 2,905 |
| 211161_s_at  | COL3A1            | 0,417 | 9,678 |
| 222904_s_at  | TMC5              | 0,417 | 5,256 |
| 228237_at    | PAPPA2            | 0,417 | 10,03 |
| 232596_at    | DIAPH3            | 0,417 | 17,87 |
| 233297_s_at  | CCDC169-SOHLH2    | 0,417 | 5,74  |
| 234310_s_at  | SUSD2             | 0,417 | 2,318 |
| 237046_x_at  | IL34              | 0,417 | 9,297 |
| 238188_at    | IBA57-AS1         | 0,417 | 4,516 |
| 1566136_at   |                   | 0,416 | 3,015 |
| 212703_at    | TLN2              | 0,416 | 5,28  |
| 242528_at    | HOXA-AS2          | 0,416 | 4,86  |
| 202291_s_at  | MGP               | 0,415 | 2,7   |
| 205906_at    | FOXJ1             | 0,415 | 3,221 |
| 230236_at    | TDRG1             | 0,415 | 3,851 |
| 231353_at    |                   | 0,415 | 2,384 |
| 233301_at    | OXCT2             | 0,415 | 2,367 |
| 1562572_at   |                   | 0,414 | 2,661 |
| 1562712_at   | LOC101927933///LF | 0,414 | 2,182 |
| 214457_at    | HOXA2             | 0,414 | 3,267 |
| 216013_at    | ZXDB              | 0,414 | 2,602 |
| 217305_s_at  | ADCY10            | 0,414 | 6,861 |
| 218690_at    | PDLIM4            | 0,414 | 2,274 |
| 223378_at    | GLIS2             | 0,414 | 4,061 |
| 230406_at    |                   | 0,414 | 3,078 |
| 214502_at    | HIST1H2BJ         | 0,413 | 2,903 |
| 243190_at    |                   | 0,413 | 2,663 |
| 1555485_s_at | LOC100507387///FA | 0,412 | 3,051 |
| 1557446_x_at | TREML3P           | 0,412 | 3,293 |
| 1569741_at   | LINC01477         | 0,412 | 2,363 |
| 200608_s_at  | RAD21             | 0,412 | 2,435 |
| 210211_s_at  | HSP90AA1          | 0,412 | 3,302 |
| 211570_s_at  | RAPSN             | 0,412 | 4,463 |
| 215847_at    | LOC101930458///HE | 0,412 | 2,527 |
| 222080_s_at  | SIRT5             | 0,412 | 2,904 |
| 225947_at    | MYO19             | 0,412 | 2,203 |
| 1552427_at   | ZNF485            | 0,411 | 4,323 |
| 1554163_at   | TWIST2            | 0,411 | 2,298 |
| 203053_at    | BCAS2             | 0,411 | 2,241 |
| 203500_at    | GCDH              | 0,411 | 2,455 |
| 211836_s_at  | MOG               | 0,411 | 2,535 |
| 225575_at    | LIFR              | 0,411 | 12,16 |

Tabelle1

|              |                  |       |        |
|--------------|------------------|-------|--------|
| 241963_at    | ZNF704           | 0,411 | 3,378  |
| 244222_at    |                  | 0,411 | 2,385  |
| 1552609_s_at | IFNL3//IFNL2     | 0,41  | 3,868  |
| 1566527_at   |                  | 0,41  | 3,596  |
| 208475_at    | FRMD4A           | 0,41  | 3,064  |
| 210028_s_at  | ORC3             | 0,41  | 2,253  |
| 212072_s_at  | CSNK2A1          | 0,41  | 3,083  |
| 214803_at    | CDH6             | 0,41  | 3,698  |
| 1559948_at   | LOC101927253     | 0,409 | 2,675  |
| 1562292_at   | ANKRD30B         | 0,409 | 4,513  |
| 1566086_at   |                  | 0,409 | 2,342  |
| 203698_s_at  | FRZB             | 0,409 | 31,959 |
| 212083_at    | TEX261           | 0,409 | 3,321  |
| 217542_at    | MDM2             | 0,409 | 4,441  |
| 1560383_at   | LOC101928658     | 0,408 | 3,402  |
| 206162_x_at  | SYT5             | 0,408 | 3,792  |
| 208642_s_at  | XRCC5            | 0,408 | 2,439  |
| 211249_at    | GPR68            | 0,408 | 3,662  |
| 215776_at    | INSRR            | 0,408 | 5,093  |
| 222950_at    | NIPAL2           | 0,408 | 6,478  |
| 223369_at    | NTMT1            | 0,408 | 2,325  |
| 1555153_s_at | FCHO2            | 0,407 | 5,206  |
| 210341_at    | MYT1             | 0,407 | 4,423  |
| 221368_at    | NEU2             | 0,407 | 5,948  |
| 236868_at    |                  | 0,407 | 2,973  |
| 61732_r_at   | IFT74            | 0,407 | 2,411  |
| 1552391_at   | CCDC185          | 0,406 | 2,441  |
| 1559586_at   | LOC728868        | 0,406 | 2,448  |
| 1562603_at   | RAD51L3-RFFL//RI | 0,406 | 2,477  |
| 1557775_a_at |                  | 0,405 | 3,836  |
| 207842_s_at  | MIR6866//CASC3   | 0,405 | 3,053  |
| 228957_at    | ZNF362           | 0,405 | 3,494  |
| 209946_at    | VEGFC            | 0,404 | 2,688  |
| 228014_at    | PTRH1            | 0,404 | 2,217  |
| 228703_at    | P4HA3            | 0,404 | 4,023  |
| 241994_at    | XDH              | 0,404 | 2,252  |
| 244589_at    | LOC105378470     | 0,404 | 5,507  |
| 221429_x_at  | TEX13A           | 0,403 | 7,625  |
| 229203_at    | B4GALNT3         | 0,403 | 3,428  |
| 236748_at    | RASGEF1C         | 0,403 | 11,532 |
| 237214_at    | TFRC             | 0,403 | 2,651  |
| 214050_at    | CGGBP1           | 0,402 | 3,919  |
| 225991_at    | TMEM41A          | 0,402 | 2,621  |
| 243928_s_at  | ABCC4            | 0,402 | 3,785  |
| 217180_at    | BMS1P20          | 0,401 | 3,572  |
| 230330_at    | PPM1D            | 0,401 | 6,887  |
| 243209_at    | KCNQ4            | 0,401 | 5,19   |
| 1563263_at   | PLCG2            | 0,4   | 17,595 |
| 1565715_at   |                  | 0,4   | 2,246  |
| 224520_s_at  | BEST3            | 0,4   | 5,013  |
| 231968_at    | UGGT1            | 0,4   | 2,352  |
| 232491_at    |                  | 0,4   | 8,726  |
| 242991_at    | TJP2             | 0,4   | 3,426  |
| 1553479_at   | TMEM145          | 0,399 | 2,327  |
| 1561010_a_at | MAOB             | 0,399 | 2,334  |
| 1570423_at   | FLG-AS1          | 0,399 | 5,507  |
| 216036_x_at  | WDTC1            | 0,399 | 2,215  |
| 216084_at    | FAM205BP         | 0,399 | 2,844  |
| 220311_at    | N6AMT1           | 0,399 | 25,222 |
| 220912_at    |                  | 0,399 | 3,728  |
| 207059_at    | PAX9             | 0,398 | 2,248  |
| 226494_at    | CAMSAP3          | 0,398 | 5,095  |
| 202385_s_at  | TCOF1            | 0,397 | 2,405  |



Tabelle1

|              |                   |       |        |
|--------------|-------------------|-------|--------|
| 219688_at    | BBS7              | 0,397 | 7,104  |
| 222211_x_at  | SCAND2P           | 0,397 | 2,726  |
| 223951_at    |                   | 0,397 | 2,859  |
| 224050_s_at  |                   | 0,397 | 4,847  |
| 224363_at    |                   | 0,397 | 5,979  |
| 226308_at    | HAUS8             | 0,397 | 2,964  |
| 34868_at     | SMG5              | 0,397 | 2,507  |
| 1562591_a_at | OFCC1             | 0,396 | 2,213  |
| 230535_s_at  | ATP5E             | 0,396 | 6,057  |
| 235153_at    | RNF183            | 0,396 | 2,903  |
| 236260_at    |                   | 0,396 | 8,029  |
| 236663_at    |                   | 0,396 | 2,747  |
| 1553485_at   | CCDC140           | 0,395 | 2,857  |
| 1554657_a_at | CFAP61            | 0,395 | 3,352  |
| 1555735_a_at | BAP1              | 0,395 | 2,528  |
| 1555864_s_at | PDHA1             | 0,395 | 2,651  |
| 207130_at    | ZMYND8            | 0,395 | 2,569  |
| 211876_x_at  | PCDHGA3///PCDHC   | 0,395 | 2,684  |
| 241037_at    |                   | 0,395 | 2,49   |
| 241746_at    | CUL7              | 0,395 | 2,264  |
| 1563297_s_at | LOC101928907      | 0,394 | 2,941  |
| 220556_at    | ATP1B4            | 0,394 | 4,173  |
| 225969_at    | ALKBH6            | 0,394 | 2,32   |
| 230686_s_at  | SLC13A3           | 0,394 | 3,295  |
| 1555237_at   |                   | 0,393 | 3,985  |
| 215548_s_at  | SCFD1             | 0,393 | 4,299  |
| 216225_at    |                   | 0,393 | 9,845  |
| 217376_at    | LOC100289473      | 0,393 | 2,477  |
| 219384_s_at  | ADAT1             | 0,393 | 2,529  |
| 224878_at    | UBFD1             | 0,393 | 2,252  |
| 228912_at    | VIL1              | 0,393 | 2,508  |
| 230308_at    | FAM120AOS         | 0,393 | 2,893  |
| 237559_at    | GPR55             | 0,393 | 3,117  |
| 41037_at     | TEAD4             | 0,393 | 3,459  |
| 208022_s_at  | CDC14B            | 0,392 | 2,341  |
| 208394_x_at  | ESM1              | 0,392 | 4,954  |
| 208777_s_at  | PSMD11            | 0,392 | 2,276  |
| 211397_x_at  | KIR2DL2           | 0,392 | 3,122  |
| 242180_at    | TSPAN16           | 0,392 | 3,484  |
| 243775_at    |                   | 0,392 | 2,393  |
| 1553523_at   | NLRP14            | 0,391 | 2,311  |
| 207147_at    | DLX2              | 0,391 | 3,152  |
| 221801_x_at  | NEFL              | 0,391 | 4,538  |
| 240935_at    |                   | 0,391 | 5,674  |
| 243062_at    | FLCN              | 0,391 | 6,058  |
| 1564856_s_at | LOC101927079///LC | 0,39  | 2,33   |
| 212718_at    | PAPOLA            | 0,39  | 3,539  |
| 214536_at    | SLURP1            | 0,39  | 2,812  |
| 214841_at    | CNIH3             | 0,39  | 3,174  |
| 236750_at    |                   | 0,39  | 4,096  |
| 238870_at    | KCNK9             | 0,39  | 4,691  |
| 239182_at    | HAGLR             | 0,39  | 5,097  |
| 206199_at    | CEACAM7           | 0,389 | 2,271  |
| 210885_s_at  | TRIM15            | 0,389 | 20,207 |
| 219302_s_at  | CNTNAP2           | 0,389 | 2,556  |
| 221400_at    | MYO3A             | 0,389 | 5,846  |
| 202582_s_at  | RANBP9            | 0,388 | 2,193  |
| 206810_at    | LOC101060181///ZN | 0,388 | 2,312  |
| 229254_at    | MFSD4A            | 0,388 | 4,806  |
| 233370_at    |                   | 0,388 | 5,269  |
| 234376_at    | MYCN              | 0,388 | 18,103 |
| 234872_at    | MYCN              | 0,388 | 5,091  |
| 237312_at    | LOC100506272      | 0,388 | 4,537  |

Tabelle1

|              |                    |       |        |
|--------------|--------------------|-------|--------|
| 1564765_at   |                    | 0,387 | 2,997  |
| 211322_s_at  | SARDH              | 0,387 | 3,115  |
| 233447_at    | PSMG4              | 0,387 | 3,393  |
| 1553076_at   | OFCC1              | 0,386 | 4,358  |
| 1557044_at   | LINC00665          | 0,386 | 3,215  |
| 206717_at    | MYH8               | 0,386 | 2,636  |
| 244134_at    |                    | 0,386 | 6,438  |
| 202489_s_at  | FXYD3              | 0,385 | 3,661  |
| 219091_s_at  | MMRN2              | 0,385 | 2,559  |
| 235405_at    | GSTA4              | 0,385 | 2,341  |
| 1569932_at   | NHSL2              | 0,384 | 2,565  |
| 205714_s_at  | ZMYND10            | 0,384 | 2,241  |
| 206879_s_at  | NRG2               | 0,384 | 3,31   |
| 207597_at    | ADAM18             | 0,384 | 4,306  |
| 211107_s_at  | AURKC              | 0,384 | 2,399  |
| 237211_x_at  | MORN3              | 0,384 | 2,249  |
| 238404_x_at  | SEZ6L2             | 0,384 | 2,848  |
| 210593_at    | ZSWIM8///SAT1      | 0,383 | 3,279  |
| 222975_s_at  | CSDE1              | 0,383 | 2,318  |
| 240801_at    | LINC01549          | 0,383 | 2,654  |
| 241360_at    | CCDC15             | 0,383 | 2,341  |
| 244787_at    |                    | 0,383 | 2,711  |
| 1557840_at   | EFHB               | 0,382 | 2,516  |
| 1561462_at   |                    | 0,382 | 3,458  |
| 207529_at    | DEFA5              | 0,382 | 3,85   |
| 231430_at    | FAM181B            | 0,382 | 3,208  |
| 235259_at    | PACRGL             | 0,382 | 2,637  |
| 1565741_at   | LOC105369974       | 0,381 | 2,33   |
| 221136_at    | GDF2               | 0,381 | 2,395  |
| 224324_at    | MRO                | 0,381 | 4,887  |
| 238850_at    | LINC00461///MIR9-2 | 0,381 | 6,431  |
| 1561249_a_at | DNM1P35            | 0,38  | 10,761 |
| 200627_at    | PTGES3             | 0,38  | 2,278  |
| 205430_at    | BMP5               | 0,38  | 8,092  |
| 213494_s_at  | YY1                | 0,38  | 2,357  |
| 222467_s_at  | PPP6R3             | 0,38  | 2,697  |
| 240091_at    | PSMA8              | 0,38  | 2,496  |
| 1561342_at   | LOC150005          | 0,379 | 7,137  |
| 1565746_at   | IPO5P1             | 0,379 | 2,96   |
| 200058_s_at  | LOC101929240///ST  | 0,379 | 2,724  |
| 201255_x_at  | BAG6               | 0,379 | 2,775  |
| 209071_s_at  | RGS5               | 0,379 | 14,644 |
| 210533_at    | MSH4               | 0,379 | 5,031  |
| 238312_s_at  | B4GALT3            | 0,379 | 3,577  |
| 1569838_at   | LOC101928597       | 0,378 | 3,272  |
| 202999_s_at  | LOXL2              | 0,378 | 4,368  |
| 214944_at    | PHLPP2             | 0,378 | 2,427  |
| 223117_s_at  | USP47              | 0,378 | 2,369  |
| 228299_at    | KCTD20             | 0,378 | 2,838  |
| 208117_s_at  | LAS1L              | 0,377 | 2,341  |
| 219430_at    | GPR137             | 0,377 | 2,467  |
| 223657_at    | FAM167B            | 0,377 | 9,506  |
| 223676_at    | TMEM234            | 0,377 | 3,415  |
| 234781_at    | OR3A3///OR1E2///O  | 0,377 | 2,848  |
| 244064_at    |                    | 0,377 | 4,003  |
| 1556437_at   | LOC253805          | 0,376 | 5,142  |
| 1561602_at   | LOC100129476       | 0,376 | 4,897  |
| 1567244_at   | OR5J2              | 0,376 | 3,25   |
| 212809_at    | NFATC2IP           | 0,376 | 2,743  |
| 237463_at    | ZFPM1              | 0,376 | 2,378  |
| 237830_at    |                    | 0,376 | 6,562  |
| 240375_at    | PIGV               | 0,376 | 2,221  |
| 1561479_at   |                    | 0,375 | 4,43   |

Tabelle1

|              |                    |       |        |
|--------------|--------------------|-------|--------|
| 1561537_at   | OGFRP1             | 0,375 | 4,194  |
| 1569147_at   |                    | 0,375 | 2,7    |
| 213565_s_at  | SMAD6              | 0,375 | 5,87   |
| 226744_at    | LOC284009///METT   | 0,375 | 2,32   |
| 237811_at    |                    | 0,375 | 16,281 |
| 1569764_at   |                    | 0,374 | 3,906  |
| 237545_at    |                    | 0,374 | 2,786  |
| 238211_at    | CASC16             | 0,374 | 2,469  |
| 1560175_at   | PPP4R1L            | 0,373 | 3,613  |
| 204660_at    | GFER               | 0,373 | 2,903  |
| 206827_s_at  | TRPV6              | 0,373 | 3,719  |
| 224691_at    | UHMK1              | 0,373 | 2,426  |
| 237342_at    | TOLLIP             | 0,373 | 3,239  |
| 238575_at    | OSBPL6             | 0,373 | 14,775 |
| 238724_at    |                    | 0,373 | 3,13   |
| 238827_at    | SH3RF2             | 0,373 | 2,878  |
| 241269_at    |                    | 0,373 | 2,743  |
| 1560047_s_at | BMS1P6             | 0,372 | 4,041  |
| 1562294_x_at | ANKRD30B           | 0,372 | 2,94   |
| 212087_s_at  | ERAL1              | 0,372 | 3,557  |
| 239844_x_at  | C1orf228           | 0,372 | 2,951  |
| 1552459_a_at | MBD3L1             | 0,371 | 2,535  |
| 1563132_at   | LINC01169          | 0,371 | 6,355  |
| 1570316_at   |                    | 0,371 | 3,032  |
| 204654_s_at  | TFAP2A             | 0,371 | 3,748  |
| 206898_at    | CDH19              | 0,371 | 21,122 |
| 209251_x_at  | TUBA1C             | 0,371 | 2,191  |
| 213200_at    | SYP                | 0,371 | 2,592  |
| 214509_at    | HIST1H3I           | 0,371 | 4,979  |
| 220842_at    | AHI1               | 0,371 | 2,749  |
| 201185_at    | HTRA1              | 0,37  | 2,379  |
| 206702_at    | TEK                | 0,37  | 2,184  |
| 214392_at    | IRGC               | 0,37  | 2,965  |
| 235149_at    | PGM2L1             | 0,37  | 2,79   |
| 235771_at    | LINC00472          | 0,37  | 2,183  |
| 236258_at    | RBBP8NL            | 0,37  | 9,917  |
| 240884_at    | CCDC14             | 0,37  | 2,626  |
| 1562923_at   | LOC101928449       | 0,369 | 5,345  |
| 220372_at    | DNAJC28            | 0,369 | 2,553  |
| 235320_at    | ARL6               | 0,369 | 3,287  |
| 236789_at    | MAPT-AS1           | 0,369 | 3,334  |
| 237296_at    |                    | 0,369 | 2,688  |
| 239192_at    | PARD3B             | 0,369 | 3,037  |
| 239623_at    | C5orf63            | 0,369 | 7,177  |
| 1563340_at   |                    | 0,368 | 2,617  |
| 205030_at    | FABP7              | 0,368 | 2,523  |
| 210520_at    | FETUB              | 0,368 | 5,084  |
| 221273_s_at  | RNF208             | 0,368 | 4,331  |
| 221999_at    | VRK3               | 0,368 | 2,518  |
| 223859_at    | EPB41L4B           | 0,368 | 3,696  |
| 1562112_at   |                    | 0,367 | 4,003  |
| 238197_at    | GATA5              | 0,367 | 19,712 |
| 239787_at    | KCTD4              | 0,367 | 4,535  |
| 1569156_at   | LOC100505555///ZNF | 0,366 | 2,911  |
| 221057_at    | SPATA1             | 0,366 | 2,668  |
| 229046_s_at  | PLEKHB1            | 0,366 | 3,896  |
| 230221_at    | ABHD16A            | 0,366 | 4,799  |
| 240211_at    | LOC100130468///AF  | 0,366 | 4,091  |
| 205320_at    | APC2               | 0,365 | 2,724  |
| 215110_at    | BMS1P21///MBL1P    | 0,365 | 3,088  |
| 219488_at    | A4GALT             | 0,365 | 6,499  |
| 220367_s_at  | SAP130             | 0,365 | 2,43   |
| 222890_at    | CCDC113            | 0,365 | 5,749  |

Tabelle1

|              |                   |       |        |
|--------------|-------------------|-------|--------|
| 243225_at    | FGF14-AS2         | 0,365 | 5,099  |
| 1559789_a_at | ZNF781            | 0,364 | 3,535  |
| 210019_at    | CALML3            | 0,364 | 2,857  |
| 214811_at    | RIMBP2            | 0,364 | 2,943  |
| 217912_at    | DUS1L             | 0,364 | 2,374  |
| 1557470_at   | SPATA13           | 0,363 | 4,143  |
| 1558066_s_at | TBC1D16           | 0,363 | 8,375  |
| 207799_x_at  | ARMCX4            | 0,363 | 3,407  |
| 216326_s_at  | HDAC3             | 0,363 | 2,197  |
| 216437_at    |                   | 0,363 | 2,436  |
| 237313_at    | C1QTNF1-AS1       | 0,363 | 2,24   |
| 1554941_at   | KLHL14            | 0,362 | 4,029  |
| 1555435_at   | AFF4              | 0,362 | 3,64   |
| 201842_s_at  | EFEMP1            | 0,362 | 3,164  |
| 232298_at    | MBNL1-AS1         | 0,362 | 3,86   |
| 242651_at    |                   | 0,362 | 2,585  |
| 1553028_at   | GPR156            | 0,361 | 2,446  |
| 214324_at    | GP2               | 0,361 | 4,68   |
| 229555_at    | GALNT5            | 0,361 | 3,355  |
| 1554740_a_at | IPP               | 0,36  | 3,26   |
| 1562216_at   |                   | 0,36  | 6,93   |
| 1570043_at   |                   | 0,36  | 2,508  |
| 227240_at    | NGEF              | 0,36  | 4,08   |
| 1553574_at   | IFNE              | 0,359 | 3,157  |
| 1559680_at   | TTL               | 0,359 | 10,718 |
| 203477_at    | COL15A1           | 0,359 | 7,636  |
| 207229_at    | KLRA1P            | 0,359 | 2,21   |
| 230374_at    | LOC105369340      | 0,359 | 2,579  |
| 239814_at    | LOC100506860      | 0,359 | 2,343  |
| 1570533_at   | CMPK1             | 0,358 | 5,361  |
| 209744_x_at  | ITCH              | 0,358 | 2,891  |
| 213749_at    | MASP1             | 0,358 | 3,929  |
| 228608_at    | NALCN             | 0,358 | 2,345  |
| 234563_at    |                   | 0,358 | 3,546  |
| 238842_at    | LOC102724002      | 0,358 | 2,641  |
| 239685_at    | LINC00900         | 0,358 | 3,138  |
| 1552540_s_at | IQCD              | 0,357 | 3,529  |
| 1565616_at   |                   | 0,357 | 3,588  |
| 203002_at    | AMOTL2            | 0,357 | 5,952  |
| 205867_at    | PTPN11            | 0,357 | 2,58   |
| 211819_s_at  | SORBS1            | 0,357 | 6,383  |
| 216828_at    | LOC100505874///MI | 0,357 | 3,195  |
| 1553663_a_at | NPB               | 0,356 | 20,205 |
| 1560347_at   |                   | 0,356 | 3,976  |
| 229448_at    | CERS1///GDF1      | 0,356 | 3,443  |
| 237357_at    | OSTM1-AS1         | 0,356 | 10,735 |
| 1557162_at   | C16orf92          | 0,355 | 3,806  |
| 210741_at    | ARHGEF12          | 0,355 | 4,533  |
| 215906_at    | Igk               | 0,355 | 12,985 |
| 217444_at    |                   | 0,355 | 3,414  |
| 237213_at    |                   | 0,355 | 3,11   |
| 243595_at    | SHB               | 0,355 | 4,377  |
| 243766_s_at  | TEAD2             | 0,355 | 3,265  |
| 219508_at    | GCNT3             | 0,354 | 5,156  |
| 224306_at    | NPC1L1            | 0,354 | 4,305  |
| 237183_at    | GALNT5            | 0,354 | 4,266  |
| 243672_at    | SALL3             | 0,354 | 3,059  |
| 1562137_at   |                   | 0,353 | 3,015  |
| 214799_at    | NFASC             | 0,353 | 5,564  |
| 217139_at    | VDAC1             | 0,353 | 6,523  |
| 228484_s_at  | FOXO1             | 0,353 | 2,27   |
| 230173_at    | TRIM4             | 0,353 | 2,361  |
| 234409_at    | ZNF354C           | 0,353 | 3,671  |

Tabelle1

|              |              |       |        |
|--------------|--------------|-------|--------|
| 235570_at    | RBMS3        | 0,353 | 3,201  |
| 236721_at    | ALKBH1       | 0,353 | 2,195  |
| 202296_s_at  | RER1         | 0,352 | 2,418  |
| 210262_at    | CRISP2       | 0,352 | 2,359  |
| 219270_at    | CHAC1        | 0,352 | 9,263  |
| 1564093_at   | NEK1         | 0,351 | 2,666  |
| 207989_at    | OPRM1        | 0,351 | 4,607  |
| 221352_at    |              | 0,351 | 3,046  |
| 232566_at    | NOL6         | 0,351 | 2,568  |
| 206941_x_at  | SEMA3E       | 0,35  | 3,463  |
| 211780_x_at  | DCTN1        | 0,35  | 2,381  |
| 221151_at    | PRDM9        | 0,35  | 5,552  |
| 237468_at    |              | 0,35  | 11,098 |
| 244644_at    | FAM9C        | 0,35  | 3,426  |
| 35685_at     | RING1        | 0,35  | 3,092  |
| 1554234_at   | KATNAL2      | 0,349 | 6,419  |
| 1565740_at   | ACACB        | 0,349 | 2,403  |
| 1569133_x_at | ARSK         | 0,349 | 3,929  |
| 204685_s_at  | ATP2B2       | 0,349 | 2,319  |
| 215652_at    | SDHD         | 0,349 | 2,926  |
| 230940_at    | LOC100288123 | 0,349 | 14,717 |
| 232106_s_at  | CEP89        | 0,349 | 3,725  |
| 207218_at    | F9           | 0,348 | 3,252  |
| 244088_at    |              | 0,348 | 6,708  |
| 212088_at    | PMPCA        | 0,347 | 2,401  |
| 214209_s_at  | ABCB9        | 0,347 | 2,714  |
| 215141_at    | NOP14-AS1    | 0,347 | 2,589  |
| 231079_at    | NANOG        | 0,347 | 3,245  |
| 231480_at    | SLC6A19      | 0,347 | 4,084  |
| 1552523_a_at | TIGD4        | 0,346 | 2,279  |
| 1562282_at   | ZNF568       | 0,346 | 4,564  |
| 202052_s_at  | RAI14        | 0,346 | 3,354  |
| 235903_at    | ANKS6        | 0,346 | 3,1    |
| 240819_at    |              | 0,346 | 4,695  |
| 240933_at    |              | 0,346 | 3,232  |
| 241977_s_at  | RAB3C        | 0,346 | 2,571  |
| 243520_x_at  | ADAM30       | 0,346 | 3,291  |
| 1553069_at   |              | 0,345 | 5,38   |
| 1557244_a_at |              | 0,345 | 2,54   |
| 211255_x_at  | DEDD         | 0,345 | 2,271  |
| 235977_at    | LONRF2       | 0,345 | 3,304  |
| 240350_at    |              | 0,345 | 3,284  |
| 240567_at    |              | 0,345 | 4,292  |
| 243863_at    | ZCWPW2       | 0,345 | 7,227  |
| 214645_at    |              | 0,344 | 3,893  |
| 218122_s_at  | SENP2        | 0,344 | 2,236  |
| 219945_at    | DDX25        | 0,344 | 2,879  |
| 230553_at    | PRDM15       | 0,344 | 2,26   |
| 231572_at    | PRSS37       | 0,344 | 2,61   |
| 240789_at    |              | 0,344 | 2,927  |
| 206725_x_at  | BMP1         | 0,343 | 11,43  |
| 216608_at    | DKFZP434A062 | 0,343 | 3,196  |
| 223589_at    | ZNF416       | 0,343 | 3,232  |
| 225209_s_at  | UBE2J2       | 0,343 | 2,185  |
| 231518_at    | LINC00922    | 0,343 | 2,224  |
| 1555648_at   | FOXP2        | 0,342 | 21,84  |
| 212939_at    | COL6A1       | 0,342 | 6,391  |
| 219758_at    | TTC26        | 0,342 | 4,295  |
| 237521_x_at  |              | 0,342 | 5,424  |
| 1568935_at   |              | 0,341 | 5,946  |
| 206768_at    | RPL3L        | 0,341 | 10,718 |
| 216856_s_at  | DLEU2        | 0,341 | 10,031 |
| 220950_s_at  | KANSL3       | 0,341 | 5,869  |

Tabelle1

|              |                   |       |        |
|--------------|-------------------|-------|--------|
| 38707_r_at   | E2F4              | 0,341 | 2,837  |
| 1560867_a_at |                   | 0,34  | 2,408  |
| 233525_s_at  | LINC00475         | 0,34  | 3,607  |
| 238017_at    | SDR16C5           | 0,34  | 4,916  |
| 239594_at    | DRAIC             | 0,34  | 2,609  |
| 208481_at    | ASB4              | 0,339 | 2,592  |
| 237282_s_at  | AKAP14            | 0,339 | 16,927 |
| 211315_s_at  | CACNA1G           | 0,338 | 2,497  |
| 210417_s_at  | PI4KB             | 0,337 | 2,69   |
| 1553492_a_at | PAX1              | 0,336 | 7,069  |
| 202465_at    | PCOLCE            | 0,336 | 10,647 |
| 207044_at    | THRB              | 0,336 | 6,016  |
| 207281_x_at  | VCX2              | 0,336 | 3,934  |
| 214303_x_at  | MUC5AC            | 0,336 | 4,286  |
| 240822_at    | TDP1              | 0,336 | 3,678  |
| 1558745_at   | SNX29             | 0,335 | 5,087  |
| 204688_at    | SGCE              | 0,335 | 2,462  |
| 216562_at    |                   | 0,335 | 13,079 |
| 219586_at    | WDR59             | 0,335 | 4,365  |
| 223535_at    | NUDT12            | 0,335 | 2,241  |
| 234410_at    | GABRR3            | 0,335 | 3,271  |
| 234693_at    | LOC105376689      | 0,335 | 6,527  |
| 236393_at    |                   | 0,335 | 3,325  |
| 215502_at    |                   | 0,334 | 28,675 |
| 217138_x_at  | IGLC1             | 0,334 | 3,658  |
| 224942_at    | PAPPA             | 0,334 | 3,757  |
| 241252_at    | ESCO2             | 0,334 | 19,948 |
| 214278_s_at  | NDRG2             | 0,333 | 2,789  |
| 218778_x_at  | EPS8L1            | 0,333 | 2,598  |
| 237127_at    |                   | 0,333 | 4,947  |
| 1561242_at   |                   | 0,332 | 2,959  |
| 1562426_a_at | STK24             | 0,332 | 2,424  |
| 209910_at    | SLC25A16          | 0,332 | 2,502  |
| 213318_s_at  | BAG6              | 0,332 | 2,323  |
| 225380_at    | PKDCC             | 0,332 | 5,024  |
| 234231_at    | CASP16P           | 0,332 | 2,917  |
| 1569773_at   | ATP8A1            | 0,331 | 2,644  |
| 219970_at    | GIPC2             | 0,331 | 2,7    |
| 231446_at    | LOC101928162      | 0,331 | 23,137 |
| 239344_at    |                   | 0,331 | 9,454  |
| 243098_at    |                   | 0,331 | 2,877  |
| 243443_at    | PPME1             | 0,331 | 3,062  |
| 224534_at    | KREMEN1           | 0,33  | 2,72   |
| 240686_x_at  | TFRC              | 0,33  | 2,397  |
| 1560717_at   | LOC105370737      | 0,329 | 4,622  |
| 220676_at    | ADAMTS8           | 0,329 | 3,788  |
| 230746_s_at  |                   | 0,329 | 7,665  |
| 243412_at    |                   | 0,329 | 4,337  |
| 244831_at    |                   | 0,329 | 2,98   |
| 1553064_at   | H1FOO             | 0,328 | 6,049  |
| 204865_at    | CA3               | 0,328 | 2,842  |
| 211536_x_at  | MAP3K7            | 0,328 | 2,405  |
| 242736_at    |                   | 0,328 | 2,476  |
| 1564413_at   | LINC01356         | 0,327 | 5,033  |
| 222867_s_at  | MED31             | 0,327 | 2,407  |
| 228875_at    | FAM162B           | 0,327 | 2,604  |
| 229201_at    | PAK3              | 0,327 | 2,873  |
| 235565_at    | ZNF425            | 0,327 | 3,642  |
| 236543_at    |                   | 0,327 | 2,448  |
| 1561136_at   | GYPE              | 0,326 | 14,653 |
| 214922_at    | ZNF484            | 0,326 | 2,624  |
| 239590_x_at  | LOC102724314///FA | 0,325 | 2,696  |
| 207569_at    | ROS1              | 0,324 | 5,27   |

Tabelle1

|              |                  |       |        |
|--------------|------------------|-------|--------|
| 227771_at    | LIFR             | 0,324 | 3,125  |
| 233293_at    | NPAS3            | 0,324 | 4,088  |
| 241213_x_at  |                  | 0,324 | 3,141  |
| 201645_at    | TNC              | 0,323 | 3,752  |
| 219564_at    | KCNJ16           | 0,323 | 10,321 |
| 237329_at    | RBMS3-AS3        | 0,323 | 2,584  |
| 1553235_at   | PCDHAC1          | 0,322 | 4,9    |
| 1560630_at   |                  | 0,322 | 2,19   |
| 1566995_at   |                  | 0,322 | 3,745  |
| 214896_at    | LINC01314        | 0,322 | 2,987  |
| 238183_at    |                  | 0,322 | 2,898  |
| 239304_at    | MFSD4A           | 0,322 | 2,25   |
| 1566295_at   |                  | 0,321 | 6,992  |
| 211369_at    |                  | 0,321 | 3,192  |
| 241189_at    |                  | 0,321 | 4,47   |
| 242635_s_at  | NAPEPLD          | 0,321 | 3,434  |
| 1558476_at   | BEND5            | 0,32  | 3,116  |
| 221424_s_at  | OR51E2           | 0,32  | 3,164  |
| 221720_s_at  |                  | 0,32  | 3,432  |
| 224181_at    | LINC00470        | 0,32  | 3,365  |
| 224458_at    | TMEM246          | 0,32  | 2,433  |
| 233527_at    | LOC101929340     | 0,32  | 2,875  |
| 238936_at    | TMEM178B         | 0,32  | 5,182  |
| 244545_at    |                  | 0,32  | 4,189  |
| 1558931_at   | CARMIL1          | 0,319 | 4,09   |
| 201643_x_at  | KDM3B            | 0,319 | 2,588  |
| 205319_at    | PSCA             | 0,319 | 2,628  |
| 214957_at    | ACTL8            | 0,319 | 4,379  |
| 234916_at    | DBH              | 0,319 | 4,09   |
| 1562231_at   |                  | 0,318 | 3,781  |
| 230076_at    | PITPNM3          | 0,318 | 2,25   |
| 233984_at    |                  | 0,318 | 2,367  |
| 240562_at    | GSK3B            | 0,318 | 8,869  |
| 241384_x_at  | GK5              | 0,318 | 3,923  |
| 1562065_at   | LOC101927582     | 0,317 | 3,966  |
| 1570306_at   | ST18             | 0,317 | 2,557  |
| 214069_at    | ACSM2B///ACSM2A  | 0,317 | 7,233  |
| 214461_at    | LBP              | 0,317 | 7,602  |
| 1554683_a_at | CCDC187          | 0,316 | 2,811  |
| 1562495_at   | ANKFY1           | 0,316 | 2,202  |
| 202311_s_at  | COL1A1           | 0,316 | 7,145  |
| 218266_s_at  | NCS1             | 0,316 | 20,247 |
| 230422_at    | FPR3             | 0,316 | 2,504  |
| 1555664_at   |                  | 0,315 | 3,396  |
| 1559638_at   | PIK3CD-AS1       | 0,315 | 2,198  |
| 216183_at    | TGM2             | 0,315 | 2,947  |
| 229761_at    | LOC440173        | 0,315 | 2,744  |
| 235195_at    | FBXW2            | 0,315 | 2,531  |
| 240667_at    | SERP2            | 0,315 | 2,316  |
| 1556508_s_at | LINC01210        | 0,314 | 3,224  |
| 1570282_at   |                  | 0,314 | 3,214  |
| 210657_s_at  | SEPT4            | 0,314 | 9,098  |
| 211679_x_at  | GABBR2           | 0,314 | 6,618  |
| 1559606_at   | GBP6             | 0,313 | 4,311  |
| 1562163_at   |                  | 0,313 | 2,877  |
| 1568922_at   | SLC24A4          | 0,313 | 2,744  |
| 203636_at    | MID1             | 0,313 | 12,093 |
| 210583_at    | POLDIP3          | 0,313 | 6,392  |
| 244184_at    |                  | 0,313 | 2,81   |
| 1553521_at   | DEFB104B///DEFB1 | 0,312 | 3,472  |
| 1557030_at   | GAB1             | 0,312 | 3,169  |
| 208272_at    | RANBP3           | 0,312 | 2,449  |
| 223523_at    | TMEM108          | 0,312 | 2,469  |

Tabelle1

|              |              |       |        |
|--------------|--------------|-------|--------|
| 231368_at    | BOD1L2       | 0,312 | 2,34   |
| 208428_at    | TAP2         | 0,311 | 4,844  |
| 234592_at    |              | 0,311 | 8,601  |
| 239444_at    | LOC728024    | 0,311 | 4,377  |
| 1561034_at   |              | 0,31  | 2,361  |
| 228016_s_at  |              | 0,31  | 2,203  |
| 1565228_s_at | ALB          | 0,309 | 3,953  |
| 1567627_at   | CD74         | 0,309 | 11,372 |
| 201617_x_at  | CALD1        | 0,309 | 3,494  |
| 210330_at    | SGCD         | 0,309 | 5,675  |
| 238958_at    | UBE2E1       | 0,309 | 12,883 |
| 243396_at    |              | 0,309 | 3,729  |
| 1564315_at   | C8orf49      | 0,308 | 3,739  |
| 232186_at    | FITM2        | 0,308 | 14,544 |
| 233981_at    | RCL1         | 0,308 | 3,9    |
| 205729_at    | OSMR         | 0,307 | 2,729  |
| 206549_at    | INSL4        | 0,307 | 2,4    |
| 231748_at    | ULBP3        | 0,307 | 4,68   |
| 233848_x_at  | ZNF221       | 0,307 | 5,03   |
| 242409_at    |              | 0,307 | 4,398  |
| 1559695_a_at |              | 0,306 | 5,67   |
| 210574_s_at  | NUDC         | 0,306 | 2,542  |
| 241256_at    | LOC101926934 | 0,306 | 2,456  |
| 244370_at    | KIAA2022     | 0,306 | 2,758  |
| 1563539_at   | LOC101927610 | 0,305 | 2,414  |
| 1566248_at   |              | 0,305 | 4,118  |
| 208338_at    | P2RX3        | 0,305 | 2,349  |
| 216567_at    | MBP          | 0,305 | 5,227  |
| 1569558_at   |              | 0,304 | 4,448  |
| 207859_s_at  | CHRNA3       | 0,304 | 2,307  |
| 217391_x_at  |              | 0,304 | 3,416  |
| 227736_at    | C10orf99     | 0,304 | 3,5    |
| 1553524_at   | DGKB         | 0,303 | 3,28   |
| 235616_at    | TSHZ2        | 0,303 | 2,179  |
| 1556445_at   |              | 0,302 | 4,596  |
| 1561054_a_at | CCDC14       | 0,302 | 2,749  |
| 1568366_at   |              | 0,302 | 3,501  |
| 227879_at    | ALKBH7       | 0,302 | 2,419  |
| 229764_at    | TPRG1        | 0,302 | 6,708  |
| 231790_at    | DMGDH        | 0,302 | 10,478 |
| 237743_at    |              | 0,302 | 2,924  |
| 242345_at    | COL28A1      | 0,302 | 2,567  |
| 220126_at    | PRSS50       | 0,301 | 4,49   |
| 227201_at    | LINC01128    | 0,301 | 2,246  |
| 240178_at    |              | 0,301 | 10,814 |
| 1558930_at   | LINC00460    | 0,3   | 5,949  |
| 1564670_at   | RAMP2-AS1    | 0,3   | 3,602  |
| 1557861_at   |              | 0,299 | 8,117  |
| 216679_at    | DDR1-AS1     | 0,299 | 2,195  |
| 223524_s_at  | TMEM108      | 0,299 | 10,423 |
| 231454_at    | PLAC4        | 0,299 | 2,953  |
| 236421_at    | ANKRD45      | 0,299 | 4,926  |
| 240067_at    |              | 0,299 | 3,007  |
| 242834_at    | UBA6         | 0,299 | 3,17   |
| 1570242_x_at | SPATA21      | 0,298 | 4,509  |
| 204413_at    | TRAF2        | 0,298 | 5,46   |
| 207899_at    | GIP          | 0,298 | 2,574  |
| 230665_at    | GUCY1A2      | 0,298 | 3,865  |
| 1566096_x_at |              | 0,297 | 3,01   |
| 209854_s_at  | KLK2         | 0,297 | 3,164  |
| 230521_at    | ARHGEF39     | 0,297 | 3,053  |
| 241805_at    | GABRG1       | 0,297 | 4,4    |
| 1557491_at   | LOC100240728 | 0,296 | 2,838  |



Tabelle1

|              |                  |       |        |
|--------------|------------------|-------|--------|
| 223895_s_at  | EPN3             | 0,296 | 3,635  |
| 233741_at    | FTCD             | 0,296 | 2,3    |
| 239810_at    | VASH1            | 0,296 | 6,802  |
| 240441_at    | FAM99B           | 0,296 | 6,939  |
| 240707_at    | CTD-2350J17.1    | 0,296 | 3,208  |
| 1554294_s_at | TTBK2            | 0,295 | 2,614  |
| 204988_at    | FGB              | 0,295 | 2,754  |
| 206048_at    | OVOL2            | 0,295 | 6,925  |
| 207191_s_at  | ISLR             | 0,295 | 5,979  |
| 217624_at    | PDAP1            | 0,295 | 7,729  |
| 1561677_at   | MACROD2          | 0,294 | 2,844  |
| 208487_at    | LMX1B            | 0,294 | 13,62  |
| 226701_at    | GJA5             | 0,294 | 4,136  |
| 231240_at    | DIO2             | 0,294 | 3,188  |
| 1565858_at   | SNORA71A         | 0,293 | 2,248  |
| 232117_at    | ZNF471           | 0,293 | 3,795  |
| 233875_at    |                  | 0,293 | 7,58   |
| 1557515_at   |                  | 0,292 | 2,695  |
| 215101_s_at  | CXCL5            | 0,292 | 4,07   |
| 234361_at    | CREB3L3          | 0,292 | 3,54   |
| 237017_s_at  | LOC102723493     | 0,292 | 2,195  |
| 1557136_at   | ATP13A4          | 0,291 | 2,389  |
| 1566543_at   |                  | 0,291 | 3,907  |
| 215676_at    | BRF1             | 0,291 | 2,807  |
| 220907_at    | ADGRF1           | 0,291 | 5,15   |
| 222312_s_at  |                  | 0,291 | 2,615  |
| 234051_at    |                  | 0,291 | 2,813  |
| 234121_at    | LOC100129069     | 0,291 | 8,54   |
| 235465_at    | AMER2            | 0,291 | 4,723  |
| 244027_at    |                  | 0,291 | 2,303  |
| 1560086_at   |                  | 0,29  | 2,409  |
| 230335_at    | C9orf50          | 0,29  | 3,032  |
| 236870_at    | IQCF4            | 0,29  | 5,534  |
| 1567272_at   | OR2K2            | 0,289 | 16,99  |
| 216313_at    | PCDHB17P         | 0,289 | 3,356  |
| 217439_at    | LOC101928278     | 0,289 | 3,236  |
| 222549_at    | CLDN1            | 0,289 | 2,327  |
| 234612_at    |                  | 0,289 | 6,346  |
| 239691_at    | C12orf77         | 0,289 | 5,156  |
| 242085_at    |                  | 0,289 | 5,295  |
| 1555988_a_at | LINC00661        | 0,288 | 2,248  |
| 205605_at    | HOXD9            | 0,288 | 13,051 |
| 212100_s_at  | POLDIP3          | 0,288 | 2,933  |
| 216154_at    |                  | 0,288 | 8,665  |
| 221457_s_at  | BTNL2            | 0,288 | 3,545  |
| 222930_s_at  | AGMAT            | 0,288 | 2,671  |
| 235904_at    | UGT3A1           | 0,288 | 3,688  |
| 237836_at    |                  | 0,288 | 4,652  |
| 208232_x_at  | NRG1             | 0,287 | 3,804  |
| 210584_s_at  | RRP7BP///POLDIP3 | 0,287 | 3,153  |
| 214880_x_at  | CALD1            | 0,287 | 11,536 |
| 220092_s_at  | ANTXR1           | 0,287 | 3,555  |
| 224245_at    | INGX             | 0,287 | 3,317  |
| 206861_s_at  | CGGBP1           | 0,286 | 2,276  |
| 209291_at    | ID4              | 0,286 | 3,488  |
| 216625_at    |                  | 0,286 | 2,608  |
| 243066_at    | NPL              | 0,286 | 2,869  |
| 1553741_at   | LINC00337        | 0,285 | 2,31   |
| 1554296_at   | CYP19A1          | 0,285 | 7,031  |
| 1563454_at   | SOX6             | 0,285 | 9,995  |
| 209749_s_at  | ACE              | 0,285 | 3,206  |
| 223908_at    | HDAC8            | 0,285 | 4,583  |
| 231971_at    | FANCM            | 0,285 | 2,581  |

Tabelle1

|              |                   |       |        |
|--------------|-------------------|-------|--------|
| 1555547_at   |                   | 0,284 | 5,572  |
| 1556778_at   |                   | 0,284 | 2,523  |
| 210929_s_at  | AHSG              | 0,284 | 2,251  |
| 234284_at    | GNG8              | 0,284 | 4,622  |
| 1558893_a_at | DEUP1             | 0,283 | 3,231  |
| 216030_s_at  | SEMG2             | 0,283 | 4,616  |
| 221132_at    | CLDN18            | 0,283 | 13,149 |
| 236852_at    | FBXO43            | 0,283 | 3,734  |
| 1561572_at   | LOC101929284      | 0,282 | 2,469  |
| 205109_s_at  | LOC101930241///AF | 0,282 | 4,502  |
| 215125_s_at  | UGT1A3///UGT1A1/  | 0,282 | 4,487  |
| 220677_s_at  | ADAMTS8           | 0,282 | 2,313  |
| 233356_at    |                   | 0,282 | 5,22   |
| 240664_at    |                   | 0,282 | 2,613  |
| 214655_at    | GPR6              | 0,281 | 2,767  |
| 220317_at    | LRAT              | 0,281 | 3,491  |
| 220325_at    | TAF7L             | 0,281 | 26,289 |
| 221114_at    | AMBN              | 0,281 | 2,3    |
| 221327_s_at  | OPN1MW3///OPN1M   | 0,281 | 3,597  |
| 238288_at    |                   | 0,281 | 3,361  |
| 221095_s_at  | KCNE2             | 0,28  | 37,306 |
| 232377_at    | NXPH1             | 0,28  | 4,719  |
| 241225_at    |                   | 0,28  | 2,232  |
| 242089_at    |                   | 0,28  | 5,177  |
| 1553772_at   | GK5               | 0,279 | 2,198  |
| 1561137_s_at | GYPE              | 0,279 | 5,032  |
| 1562916_at   | LINC00102         | 0,279 | 7,339  |
| 205404_at    | HSD11B1           | 0,279 | 2,373  |
| 206085_s_at  | CTH               | 0,278 | 2,663  |
| 208148_at    | MYH4              | 0,278 | 8,449  |
| 208582_s_at  | DUX1///DUX3///DUX | 0,278 | 7,483  |
| 221035_s_at  | TEX14             | 0,278 | 4,012  |
| 230842_at    |                   | 0,278 | 2,223  |
| 244704_at    | NFYB              | 0,278 | 2,978  |
| 215468_at    | LOC647070         | 0,277 | 9,333  |
| 219899_x_at  | NDOR1             | 0,277 | 2,22   |
| 233234_at    | KCTD16            | 0,277 | 3,548  |
| 1554820_at   | AGBL3             | 0,276 | 5,289  |
| 1563078_at   | LOC101929460      | 0,276 | 3,278  |
| 1569426_at   | LOC100996342      | 0,276 | 2,751  |
| 221232_s_at  | ANKRD2            | 0,276 | 5,896  |
| 238158_at    | MEIG1             | 0,276 | 3,622  |
| 240266_at    |                   | 0,276 | 2,85   |
| 241636_x_at  |                   | 0,276 | 22,935 |
| 1555854_at   | LOC101930400///A  | 0,275 | 4,197  |
| 204904_at    | GJA4              | 0,275 | 3,593  |
| 208473_s_at  | GP2               | 0,275 | 2,38   |
| 230957_at    |                   | 0,275 | 3,153  |
| 240268_at    | LOC440117         | 0,275 | 6,517  |
| 1553835_a_at | COL6A5            | 0,274 | 3,714  |
| 1554140_at   | WDR78             | 0,274 | 5,562  |
| 1555229_a_at | C1S               | 0,274 | 17,737 |
| 1568706_s_at | PP12719           | 0,274 | 2,943  |
| 223704_s_at  | DMRT2             | 0,274 | 2,527  |
| 236272_at    | UNC119B           | 0,274 | 2,479  |
| 243633_at    |                   | 0,274 | 2,514  |
| 244318_at    |                   | 0,274 | 6,335  |
| 1553674_at   | LRRIQ3            | 0,273 | 3,82   |
| 1561041_at   | TNRC6C            | 0,273 | 8,631  |
| 232302_at    | PDLIM2            | 0,273 | 3,484  |
| 237436_at    |                   | 0,273 | 3,662  |
| 1553500_at   | FBXL21            | 0,272 | 2,479  |
| 1561605_at   | LOC101928326      | 0,272 | 5,775  |

Tabelle1

|              |                |       |        |
|--------------|----------------|-------|--------|
| 1563610_at   | LOC157273      | 0,272 | 6,453  |
| 215300_s_at  | FMO5           | 0,272 | 3,958  |
| 238336_s_at  | DNAJC21        | 0,272 | 3,885  |
| 203697_at    | FRZB           | 0,271 | 11,007 |
| 208321_s_at  | CABP1          | 0,271 | 4,991  |
| 217505_at    | PHOSPHO2-KLHL2 | 0,271 | 2,617  |
| 234189_at    |                | 0,271 | 3,196  |
| 243227_at    |                | 0,271 | 3,19   |
| 1562261_at   | AMZ1           | 0,27  | 3,215  |
| 237800_at    |                | 0,27  | 5,198  |
| 240716_at    | TTC23          | 0,27  | 2,78   |
| 240746_s_at  | LOC101927760   | 0,27  | 2,468  |
| 1553722_s_at | RNF152         | 0,269 | 23,424 |
| 1554143_a_at | SUGT1P3        | 0,269 | 4,058  |
| 1564262_at   |                | 0,269 | 3,523  |
| 211492_s_at  | ADRA1A         | 0,269 | 2,963  |
| 214087_s_at  | MYBPC1         | 0,269 | 4,926  |
| 217133_x_at  | CYP2B6         | 0,269 | 4,84   |
| 219474_at    | C3orf52        | 0,269 | 7,139  |
| 1556231_a_at | URI1           | 0,268 | 3,047  |
| 1556781_at   |                | 0,268 | 2,965  |
| 1560582_a_at |                | 0,268 | 2,776  |
| 230061_at    | TM4SF18        | 0,268 | 11,96  |
| 1555053_at   | SYT9           | 0,267 | 2,278  |
| 1566513_a_at | GNG4           | 0,267 | 4,171  |
| 229716_at    | UBXN10-AS1     | 0,267 | 3,897  |
| 232907_at    | UBR4           | 0,267 | 2,181  |
| 240107_at    |                | 0,267 | 2,486  |
| 1553072_at   | BNIP1          | 0,266 | 4,019  |
| 1553789_a_at | C21orf58       | 0,266 | 8,74   |
| 215904_at    | AFDN           | 0,266 | 4,891  |
| 217079_at    |                | 0,266 | 4,453  |
| 232533_at    | METTL8         | 0,266 | 2,355  |
| 234855_at    | ORF1           | 0,266 | 2,91   |
| 235460_at    | SNX22          | 0,266 | 8,017  |
| 240035_at    |                | 0,266 | 3,983  |
| 1553391_at   | CXorf58        | 0,265 | 3,934  |
| 206378_at    | SCGB2A2        | 0,265 | 5,532  |
| 222271_at    |                | 0,265 | 3,113  |
| 232193_at    | GSTT1          | 0,265 | 4,039  |
| 236894_at    | L1TD1          | 0,265 | 4,892  |
| 242067_at    |                | 0,265 | 4,957  |
| 1554195_a_at | C5orf46        | 0,264 | 2,195  |
| 1570292_at   | LOC101927123   | 0,264 | 4,311  |
| 226492_at    | SEMA6D         | 0,264 | 6,255  |
| 236876_at    | H1FNT          | 0,264 | 2,726  |
| 1557027_at   | LOC100287221   | 0,263 | 6,165  |
| 1562167_a_at | DEFB122        | 0,263 | 6,558  |
| 1562388_at   | LOC285819      | 0,263 | 2,257  |
| 210961_s_at  | ADRA1D         | 0,263 | 4,975  |
| 215475_at    |                | 0,263 | 6,442  |
| 216004_s_at  | PKNOX1         | 0,263 | 2,64   |
| 228939_at    | OAF            | 0,263 | 3,1    |
| 229599_at    | SMIM22         | 0,263 | 2,737  |
| 240598_at    |                | 0,263 | 3,385  |
| 210748_at    |                | 0,262 | 5,533  |
| 211438_at    | TRHR           | 0,262 | 2,866  |
| 222084_s_at  | SBF1           | 0,262 | 2,78   |
| 238657_at    | UBXN10         | 0,262 | 3,128  |
| 240284_x_at  | LOC105369635   | 0,262 | 4,016  |
| 244204_at    | PRR3           | 0,262 | 4,066  |
| 1559648_at   | LINC00892      | 0,261 | 2,383  |
| 1561212_at   |                | 0,261 | 2,518  |

Tabelle1

|              |                   |       |        |
|--------------|-------------------|-------|--------|
| 230745_s_at  | TOX3              | 0,261 | 12,85  |
| 238163_at    | LOC102725343      | 0,261 | 2,985  |
| 240564_x_at  |                   | 0,261 | 3,35   |
| 205498_at    | GHR               | 0,26  | 5,705  |
| 220636_at    | DNAI2             | 0,26  | 3,644  |
| 1558867_at   | DSE               | 0,259 | 9,757  |
| 1562631_at   | TEX26-AS1         | 0,259 | 9,207  |
| 1563943_at   | PPARGC1B          | 0,259 | 4,677  |
| 1566526_at   | LINC00927         | 0,259 | 6,706  |
| 1569176_at   | TMPRSS12          | 0,259 | 2,713  |
| 206329_at    | EXTL1             | 0,259 | 5,12   |
| 223987_at    | CHRD12            | 0,259 | 4,659  |
| 236993_at    |                   | 0,259 | 3,155  |
| 237275_at    | LINC00458         | 0,259 | 8,073  |
| 239634_at    | LOC101927248      | 0,259 | 4,922  |
| 244758_at    | ZBED9             | 0,259 | 2,976  |
| 205304_s_at  | KCNJ8             | 0,258 | 4,185  |
| 206819_at    | POM121L9P         | 0,258 | 2,574  |
| 1552747_a_at | PP2D1             | 0,257 | 4,772  |
| 1561211_at   | LOC101930541      | 0,257 | 4,213  |
| 207690_at    | ALX3              | 0,257 | 2,595  |
| 224184_s_at  | BOC               | 0,257 | 9,403  |
| 227596_at    | FLJ37453          | 0,257 | 2,685  |
| 228575_at    | IL20RB            | 0,257 | 4,336  |
| 228682_at    |                   | 0,257 | 3,274  |
| 1552689_at   | CASKIN1           | 0,256 | 6,005  |
| 1555265_at   | ABCC13            | 0,256 | 4,677  |
| 219580_s_at  | TMC5              | 0,256 | 11,253 |
| 237013_at    |                   | 0,256 | 3,717  |
| 241431_at    |                   | 0,256 | 2,354  |
| 241675_s_at  |                   | 0,256 | 4,209  |
| 244827_at    |                   | 0,256 | 6,226  |
| 1557476_at   | PFN4              | 0,255 | 4,839  |
| 1569760_at   | LRRC37A7P         | 0,255 | 2,527  |
| 208016_s_at  | AGTR1             | 0,255 | 7,446  |
| 215181_at    | CDH22             | 0,255 | 3,043  |
| 230744_at    | FSTL1             | 0,255 | 8,387  |
| 243161_x_at  | ZFP42             | 0,255 | 2,273  |
| 1560138_at   | RUBCN             | 0,254 | 6,676  |
| 202525_at    | PRSS8             | 0,254 | 6,305  |
| 234541_s_at  | ARHGEF12          | 0,254 | 6,285  |
| 1554765_a_at | LINC00301         | 0,253 | 5,945  |
| 1562972_at   | LINC00929         | 0,253 | 2,758  |
| 1563614_at   | MTBP              | 0,253 | 3,748  |
| 1569407_at   |                   | 0,253 | 8,201  |
| 222171_s_at  | PKNOX2            | 0,253 | 16,288 |
| 230853_at    | FEM1A             | 0,253 | 3,275  |
| 244472_at    | TRABD2B           | 0,253 | 2,508  |
| 1556940_at   | LOC283484         | 0,252 | 2,501  |
| 1569858_at   | LOC101927358      | 0,252 | 2,33   |
| 232104_at    | STUM              | 0,252 | 7,147  |
| 234845_at    | LOC100130370      | 0,252 | 2,331  |
| 236152_at    | PAGE5             | 0,252 | 13,842 |
| 238489_at    | PRKAA2            | 0,252 | 2,229  |
| 1552839_at   | FAM71D            | 0,251 | 3,209  |
| 1566176_at   | CLYBL-AS1         | 0,251 | 4,54   |
| 210614_at    | TTPA              | 0,251 | 3,456  |
| 227633_at    | RHEB              | 0,251 | 3,302  |
| 231337_at    | LOC100505498///TE | 0,251 | 2,33   |
| 234063_at    |                   | 0,251 | 5,857  |
| 236111_at    |                   | 0,251 | 2,619  |
| 238661_at    | MIR124-2HG        | 0,251 | 7,271  |
| 1554865_at   |                   | 0,25  | 12,498 |

Tabelle1

|              |                    |       |        |
|--------------|--------------------|-------|--------|
| 1555139_a_at | OTUD7B             | 0,25  | 8,948  |
| 1566152_a_at |                    | 0,25  | 3,673  |
| 233238_s_at  | CTB-12O2.1         | 0,25  | 5      |
| 1557877_s_at | LINC01020          | 0,249 | 2,773  |
| 1560971_a_at |                    | 0,249 | 4,157  |
| 1561593_at   |                    | 0,249 | 23,883 |
| 205680_at    | MMP10              | 0,249 | 2,998  |
| 206801_at    | NPPB               | 0,249 | 4,465  |
| 236230_at    |                    | 0,249 | 3,625  |
| 243301_at    | COL22A1            | 0,249 | 10,184 |
| 1553447_at   | AGBL1              | 0,248 | 3,243  |
| 1557402_at   | ZKSCAN8            | 0,248 | 5,321  |
| 1570024_at   |                    | 0,248 | 6,825  |
| 212545_s_at  | ZHX3               | 0,248 | 11,508 |
| 223595_at    | TMEM133            | 0,248 | 6,974  |
| 242631_x_at  | DLC1               | 0,248 | 2,564  |
| 1552585_s_at | GTF2A1L            | 0,247 | 2,952  |
| 208441_at    | IGF1R              | 0,247 | 2,91   |
| 220717_at    | ADAMTS20           | 0,247 | 2,255  |
| 227781_x_at  | FAM57B             | 0,247 | 7,886  |
| 234528_at    |                    | 0,247 | 2,598  |
| 237844_at    | LOC100506639///ZNF | 0,247 | 6,361  |
| 1559518_at   | HSD17B12           | 0,246 | 2,27   |
| 1563225_a_at |                    | 0,246 | 3,201  |
| 232089_at    | LINC00921///TIGD7, | 0,246 | 2,977  |
| 234483_at    | ACSS1              | 0,246 | 3,505  |
| 240063_at    | GUSBP5             | 0,246 | 2,729  |
| 1562579_at   |                    | 0,245 | 4,856  |
| 211125_x_at  | GRIN1              | 0,245 | 4,729  |
| 242715_at    | ZNF536             | 0,245 | 4,339  |
| 1553261_x_at | ALS2CR11           | 0,244 | 6,004  |
| 1560634_a_at | LOC105373876       | 0,244 | 2,361  |
| 1563950_at   |                    | 0,244 | 7,318  |
| 205969_at    | AADAC              | 0,244 | 4,311  |
| 216122_at    |                    | 0,244 | 3,19   |
| 225571_at    | LIFR               | 0,244 | 13,614 |
| 228335_at    | CLDN11             | 0,244 | 8,662  |
| 240460_at    | LOC101929122       | 0,244 | 4,371  |
| 1554449_at   | MIER3              | 0,243 | 2,706  |
| 1556461_at   |                    | 0,243 | 2,288  |
| 1570126_at   |                    | 0,243 | 4,401  |
| 210080_x_at  | CELA3A             | 0,243 | 3,576  |
| 213968_at    |                    | 0,243 | 3,768  |
| 222695_s_at  | AXIN2              | 0,243 | 3,516  |
| 225242_s_at  | CCDC80             | 0,243 | 2,929  |
| 243152_at    | COPS8              | 0,243 | 34,913 |
| 1569383_s_at | ZFYVE28            | 0,242 | 3,327  |
| 209070_s_at  | RGS5               | 0,242 | 17,55  |
| 215686_x_at  | TFAP2B             | 0,242 | 27,793 |
| 229859_at    |                    | 0,242 | 4,81   |
| 243116_at    | PIP5KL1            | 0,242 | 5,075  |
| 243325_at    |                    | 0,242 | 2,243  |
| 234387_at    | COL4A5             | 0,241 | 2,19   |
| 1556970_at   |                    | 0,24  | 3,259  |
| 1562611_at   |                    | 0,24  | 4,189  |
| 237025_at    |                    | 0,24  | 2,498  |
| 233846_at    | CCDC85A            | 0,239 | 3,876  |
| 238634_x_at  | LIPJ               | 0,239 | 4,078  |
| 242762_s_at  | FAM171B            | 0,239 | 4,033  |
| 1557277_a_at | LINC01016          | 0,238 | 3,759  |
| 1560734_at   | LOC101927079///LC  | 0,238 | 5,271  |
| 207062_at    | IAPP               | 0,238 | 4,743  |
| 212389_at    | SBF1               | 0,238 | 2,33   |

Tabelle1

|              |              |       |        |
|--------------|--------------|-------|--------|
| 214159_at    | PLCE1        | 0,238 | 3,132  |
| 215368_at    | NEB          | 0,238 | 6,188  |
| 216216_at    | SLIT3        | 0,238 | 2,334  |
| 241700_at    | ZFHx4        | 0,238 | 3,687  |
| 1560617_at   | LOC100128198 | 0,237 | 2,349  |
| 1562527_at   | LOC441666    | 0,237 | 2,648  |
| 1563092_at   |              | 0,237 | 3,03   |
| 207149_at    | CDH12        | 0,237 | 3,034  |
| 213740_s_at  | TMEM262      | 0,237 | 8,315  |
| 216596_at    | DKFZP434L187 | 0,237 | 2,43   |
| 1554801_at   | FNDC9        | 0,236 | 2,544  |
| 1562215_at   |              | 0,236 | 7,061  |
| 1562761_at   | NMRK1        | 0,236 | 9,96   |
| 206699_x_at  | NPAS1        | 0,236 | 2,309  |
| 216277_at    | BUB1         | 0,236 | 7,759  |
| 240002_at    | LINC00937    | 0,236 | 9,096  |
| 241094_at    |              | 0,236 | 6,194  |
| 1562020_s_at | NT5DC4       | 0,235 | 21,964 |
| 1563595_at   | SRGAP3       | 0,235 | 3,201  |
| 229403_at    | B4GALT1      | 0,235 | 2,185  |
| 236480_at    | MIR210HG     | 0,235 | 5,193  |
| 240640_at    |              | 0,235 | 2,863  |
| 240749_at    | LOC105375075 | 0,235 | 7,063  |
| 1559255_a_at |              | 0,234 | 2,778  |
| 203499_at    | EPHA2        | 0,234 | 2,226  |
| 210600_s_at  | GRK4         | 0,234 | 9,702  |
| 221795_at    | NTRK2        | 0,234 | 3,152  |
| 224067_at    |              | 0,234 | 2,675  |
| 229591_at    | LRP5         | 0,234 | 2,583  |
| 1562893_at   | LOC101927657 | 0,233 | 3,043  |
| 205108_s_at  | APOB         | 0,233 | 2,685  |
| 243978_at    | FAM65C       | 0,233 | 14,667 |
| 229918_at    | CCDC40       | 0,232 | 2,191  |
| 206260_at    | TGM4         | 0,231 | 2,625  |
| 207914_x_at  | EVX1         | 0,231 | 2,322  |
| 215303_at    | DCLK1        | 0,231 | 4,932  |
| 216385_at    | LOC220077    | 0,231 | 3,376  |
| 230943_at    | SOX17        | 0,231 | 2,818  |
| 233488_at    | RNASE7       | 0,23  | 4,63   |
| 238256_at    |              | 0,23  | 4,457  |
| 1557060_at   | OVAAL        | 0,229 | 2,203  |
| 1559909_a_at | TIMM17B      | 0,229 | 4,523  |
| 207773_x_at  | CYP3A43      | 0,229 | 2,928  |
| 208263_at    | SRP72        | 0,229 | 11,211 |
| 234508_at    |              | 0,229 | 3,648  |
| 241171_at    |              | 0,229 | 2,353  |
| 207137_at    | TONSL        | 0,228 | 2,348  |
| 243577_at    |              | 0,228 | 4,146  |
| 1555400_at   | LOC645261    | 0,227 | 4,957  |
| 1555757_at   | C7orf34      | 0,227 | 7,66   |
| 1562835_at   |              | 0,227 | 2,568  |
| 208597_at    | CNTF         | 0,227 | 3,774  |
| 221583_s_at  | KCNMA1       | 0,227 | 3,233  |
| 228128_x_at  | PAPPA        | 0,227 | 6,86   |
| 244525_at    |              | 0,227 | 2,856  |
| 1555085_at   | LOC101928751 | 0,226 | 3,86   |
| 1563316_at   | NEGR1-IT1    | 0,226 | 2,974  |
| 219087_at    | ASPN         | 0,226 | 3,909  |
| 224292_at    | TTTY13       | 0,226 | 2,502  |
| 233895_at    | ANKRD24      | 0,226 | 3,051  |
| 234716_at    | ZIC1         | 0,226 | 2,211  |
| 241014_at    | FLG-AS1      | 0,226 | 9,635  |
| 241717_at    | MOBP         | 0,226 | 3,944  |

Tabelle1

|              |                  |       |        |
|--------------|------------------|-------|--------|
| 242158_at    | PAPOLB           | 0,226 | 7,149  |
| 1567333_at   |                  | 0,225 | 5,654  |
| 208027_s_at  | TLL2             | 0,225 | 4,439  |
| 221338_at    | LY6G6E           | 0,225 | 6,154  |
| 239341_at    |                  | 0,225 | 2,272  |
| 241592_at    |                  | 0,225 | 3,735  |
| 1553541_at   | LMX1A            | 0,224 | 4,268  |
| 1563523_at   |                  | 0,224 | 2,202  |
| 1564545_a_at |                  | 0,224 | 3,984  |
| 203903_s_at  | HEPH             | 0,224 | 2,449  |
| 204997_at    | GPD1             | 0,224 | 14,13  |
| 205777_at    | DUSP9            | 0,224 | 2,282  |
| 207709_at    | PRKAA2           | 0,224 | 3,563  |
| 214023_x_at  | TUBB2B           | 0,224 | 4,478  |
| 217218_at    | WAPL             | 0,224 | 4,584  |
| 231490_at    |                  | 0,224 | 7,865  |
| 231557_at    | LOC102724842     | 0,224 | 2,52   |
| 234064_at    |                  | 0,224 | 5,686  |
| 1556718_s_at | MIR194-2         | 0,223 | 6,479  |
| 1561914_at   |                  | 0,223 | 2,882  |
| 1570337_at   | FIGLA            | 0,223 | 2,401  |
| 210305_at    | PDE4DIP          | 0,223 | 4,771  |
| 213611_at    | AQP5             | 0,223 | 2,999  |
| 222830_at    | GRHL1            | 0,223 | 5,06   |
| 229148_at    | HOTAIRM1///HOXA: | 0,223 | 2,635  |
| 237484_at    | SMCO3            | 0,223 | 4,355  |
| 240191_at    | ZNF543           | 0,223 | 10,775 |
| 242395_at    |                  | 0,223 | 2,601  |
| 243234_at    | TBX3             | 0,223 | 10,614 |
| 1566337_x_at | CHML             | 0,222 | 5,862  |
| 1569609_at   |                  | 0,222 | 15,188 |
| 211242_x_at  | KIR2DL4          | 0,222 | 2,566  |
| 230369_at    | GPR161           | 0,222 | 2,862  |
| 241161_at    |                  | 0,222 | 15,836 |
| 1562464_at   |                  | 0,221 | 3,442  |
| 207232_s_at  | DZIP3            | 0,221 | 2,416  |
| 213443_at    | TRADD            | 0,221 | 4,52   |
| 234291_s_at  | SLC6A20          | 0,221 | 2,305  |
| 238126_at    | APTR             | 0,221 | 8,024  |
| 241137_at    | DPCR1            | 0,221 | 2,659  |
| 1557349_at   | RERE             | 0,22  | 4,126  |
| 1566186_at   |                  | 0,22  | 2,191  |
| 215673_at    | TEF              | 0,22  | 16,683 |
| 221157_s_at  | FBXO24           | 0,22  | 7,557  |
| 231586_at    | SPATA42          | 0,22  | 2,332  |
| 234256_at    | SEBOX///VTN      | 0,219 | 17,132 |
| 234280_at    | REG3A            | 0,219 | 5,21   |
| 244393_x_at  |                  | 0,219 | 2,229  |
| 1560288_at   | LOC101927196     | 0,218 | 13,137 |
| 1562982_at   | LINC01448        | 0,218 | 3,502  |
| 1568869_at   |                  | 0,218 | 2,913  |
| 214619_at    | CRHR1            | 0,217 | 4,625  |
| 215661_at    | MAST2            | 0,217 | 3,907  |
| 226051_at    | SELM             | 0,217 | 4,559  |
| 234185_at    |                  | 0,217 | 4,273  |
| 1556531_at   |                  | 0,216 | 2,31   |
| 212950_at    | ADGRF5           | 0,216 | 5,448  |
| 235289_at    | EIF5A2           | 0,216 | 3,067  |
| 1553214_a_at | CCDC7            | 0,215 | 3,428  |
| 1566440_at   | CTNND2           | 0,215 | 3,753  |
| 207175_at    | ADIPOQ           | 0,215 | 2,345  |
| 208032_s_at  | GRIA3            | 0,215 | 3,964  |
| 213569_at    | LOC100506603     | 0,215 | 2,277  |

Tabelle1

|              |                  |       |        |
|--------------|------------------|-------|--------|
| 214301_s_at  | DPYSL4           | 0,215 | 3,111  |
| 227821_at    | LGI4             | 0,215 | 2,801  |
| 234686_at    | SUGT1P1          | 0,215 | 8,794  |
| 234961_at    |                  | 0,215 | 15,586 |
| 236819_at    | PTBP1            | 0,215 | 2,768  |
| 205852_at    | CDK5R2           | 0,214 | 3,635  |
| 1557275_a_at | TLCD2            | 0,213 | 18,378 |
| 207965_at    | NEUROG3          | 0,213 | 2,403  |
| 219983_at    | HRASLS           | 0,213 | 2,857  |
| 230771_at    | NKAIN4           | 0,213 | 2,607  |
| 233566_at    | LINC00839        | 0,213 | 3,15   |
| 233581_at    | METTTL6          | 0,213 | 2,298  |
| 236822_at    |                  | 0,213 | 6,641  |
| 244836_at    |                  | 0,213 | 5,581  |
| 1557080_s_at | ITGBL1           | 0,212 | 6,511  |
| 211712_s_at  | ANXA9            | 0,211 | 9,627  |
| 215591_at    | SATB2            | 0,211 | 4,879  |
| 217154_s_at  | EDN3             | 0,211 | 2,427  |
| 227589_at    | PITPNC1          | 0,211 | 2,187  |
| 233160_at    | DEFB129          | 0,211 | 2,179  |
| 238309_x_at  |                  | 0,211 | 3,029  |
| 1561384_a_at | LOC284661        | 0,21  | 2,235  |
| 202011_at    | TJP1             | 0,21  | 3,663  |
| 207230_at    | CDON             | 0,21  | 2,685  |
| 214782_at    | CTTN             | 0,21  | 14,642 |
| 215272_at    | OGG1             | 0,21  | 3,73   |
| 230055_at    | KHDC1            | 0,21  | 3,084  |
| 1556444_a_at | LOC100288310     | 0,209 | 2,43   |
| 230193_at    | WDR66            | 0,209 | 7,554  |
| 233618_at    | LOC105376379     | 0,209 | 2,56   |
| 236262_at    | MMRN2            | 0,209 | 16,729 |
| 203131_at    | PDGFRA           | 0,208 | 7,328  |
| 224241_s_at  |                  | 0,208 | 4,994  |
| 1554777_at   | ZFP42            | 0,207 | 3,967  |
| 1555498_at   |                  | 0,207 | 29,294 |
| 1563536_at   |                  | 0,207 | 3,583  |
| 203071_at    | MIR6872///SEMA3B | 0,207 | 4,801  |
| 207142_at    | KCNJ3            | 0,207 | 8,798  |
| 208111_at    | AVPR2            | 0,207 | 2,667  |
| 224208_at    | PLEKHA8          | 0,207 | 4,015  |
| 231649_at    |                  | 0,207 | 2,964  |
| 233129_at    |                  | 0,207 | 2,867  |
| 237937_x_at  |                  | 0,207 | 5,318  |
| 239652_at    |                  | 0,207 | 13,382 |
| 1556213_a_at | BTG3             | 0,206 | 3,218  |
| 1566156_at   |                  | 0,206 | 6,446  |
| 205696_s_at  | GFRA1            | 0,206 | 8,742  |
| 223798_at    | SLC41A2          | 0,206 | 2,459  |
| 224694_at    | ANTXR1           | 0,206 | 3,362  |
| 237117_at    |                  | 0,206 | 6,418  |
| 205117_at    | FGF1             | 0,205 | 2,67   |
| 216359_at    | MUC7             | 0,205 | 4,005  |
| 237059_at    | VTA1             | 0,205 | 6,493  |
| 1559634_at   | CHRM3            | 0,204 | 6,076  |
| 1570160_at   |                  | 0,204 | 2,869  |
| 206496_at    | FMO3             | 0,204 | 23,534 |
| 210636_at    | PPARD            | 0,204 | 10,296 |
| 238889_at    | AGBL5            | 0,204 | 5,761  |
| 1558391_s_at | ZNF599           | 0,203 | 3,001  |
| 1569876_at   | EFCAB13          | 0,203 | 5,919  |
| 207084_at    | POU3F2           | 0,203 | 4,744  |
| 235949_at    | TTC26            | 0,203 | 2,983  |
| 1554874_at   | MITF             | 0,202 | 4,711  |



Tabelle1

|              |              |       |        |
|--------------|--------------|-------|--------|
| 1556903_at   | LOC101928335 | 0,202 | 2,844  |
| 1561394_s_at | KIAA1755     | 0,202 | 2,613  |
| 1561754_at   |              | 0,202 | 3,446  |
| 229372_at    | GOLT1A       | 0,202 | 7,532  |
| 235988_at    | ADGRF1       | 0,202 | 5,524  |
| 1568874_at   | NCOA6        | 0,201 | 2,213  |
| 220921_at    | SPANXB1      | 0,201 | 17,76  |
| 228432_at    | RAB3IP       | 0,201 | 10,236 |
| 242137_at    | RBMS3        | 0,201 | 12,987 |
| 1563339_at   |              | 0,2   | 2,369  |
| 230931_at    | PLG          | 0,2   | 2,81   |
| 242719_at    | RYBP         | 0,2   | 2,83   |
| 244562_s_at  |              | 0,2   | 11,389 |
| 244776_at    |              | 0,2   | 3,444  |
| 1557583_at   | ST18         | 0,199 | 2,41   |
| 208059_at    | CCR8         | 0,199 | 3,551  |
| 1562076_at   |              | 0,198 | 8,293  |
| 1563860_at   | LOC400965    | 0,198 | 7,394  |
| 1564933_at   |              | 0,198 | 4,15   |
| 233615_at    | CGA          | 0,198 | 2,457  |
| 240888_at    |              | 0,198 | 2,808  |
| 242661_x_at  | ALS2CR12     | 0,198 | 5,49   |
| 1555135_at   |              | 0,197 | 3,911  |
| 207664_at    | ADAM2        | 0,197 | 4,13   |
| 217129_at    |              | 0,197 | 2,395  |
| 224093_at    | IFNK         | 0,197 | 8,557  |
| 236606_at    |              | 0,197 | 2,317  |
| 1562351_at   |              | 0,196 | 4,101  |
| 1562443_at   | CLVS2        | 0,196 | 2,534  |
| 206136_at    | FZD5         | 0,196 | 3,748  |
| 206166_s_at  | CLCA2        | 0,196 | 3,12   |
| 220858_at    | SORBS2       | 0,196 | 2,627  |
| 229478_x_at  | BIVM         | 0,196 | 2,666  |
| 231158_x_at  | PTBP1        | 0,196 | 2,584  |
| 1556171_a_at | LOC101927516 | 0,195 | 2,189  |
| 1564282_a_at | LINC00491    | 0,195 | 7,755  |
| 1564307_a_at | A2ML1        | 0,195 | 2,631  |
| 213181_s_at  | MOCS1        | 0,195 | 2,333  |
| 228427_at    | FBXO16       | 0,195 | 3,957  |
| 237192_at    | LOC101927668 | 0,195 | 17,235 |
| 239433_at    | LRRC8E       | 0,195 | 3,623  |
| 1553747_at   | MGC16025     | 0,194 | 2,191  |
| 1560690_at   | LINC01153    | 0,194 | 3,953  |
| 1568971_at   | PCNX4        | 0,194 | 2,244  |
| 1569230_at   |              | 0,194 | 4,549  |
| 210404_x_at  | CAMK2B       | 0,194 | 4,801  |
| 234234_at    | LOC101929705 | 0,194 | 10,096 |
| 1564175_at   | LINC00960    | 0,193 | 3,47   |
| 206504_at    | CYP24A1      | 0,193 | 3,016  |
| 217428_s_at  | COL10A1      | 0,193 | 3,964  |
| 220971_at    | IL25         | 0,193 | 5,567  |
| 235377_at    | MLIP         | 0,193 | 4,742  |
| 241653_x_at  |              | 0,193 | 13,389 |
| 823_at       | CX3CL1       | 0,193 | 3,613  |
| 1554961_at   | FGFR4        | 0,192 | 12,87  |
| 1564459_at   | DDC-AS1      | 0,192 | 6,328  |
| 206597_at    | NRL          | 0,192 | 8,824  |
| 208378_x_at  | FGF5         | 0,192 | 2,69   |
| 222225_at    | RPL23AP53    | 0,192 | 2,549  |
| 224069_x_at  | P2RX2        | 0,192 | 3,263  |
| 227403_at    | PIGX         | 0,192 | 2,957  |
| 1556012_at   | KLHDC7A      | 0,191 | 6,853  |
| 216643_at    |              | 0,191 | 4,944  |

Tabelle1

|              |                   |       |        |
|--------------|-------------------|-------|--------|
| 215254_at    | RCAN1             | 0,19  | 2,496  |
| 224290_at    | VN1R3             | 0,19  | 5,593  |
| 235254_at    |                   | 0,19  | 3,808  |
| 1563120_at   | LOC100131270///LC | 0,189 | 2,288  |
| 1565604_at   | PWP2              | 0,189 | 4,1    |
| 1568899_at   | LOC101929511      | 0,189 | 4,781  |
| 210497_x_at  | SSX2B///SSX2      | 0,189 | 2,486  |
| 217213_at    | SLC6A2            | 0,189 | 12,258 |
| 219823_at    | LIN28A            | 0,189 | 2,241  |
| 227933_at    | LINGO1            | 0,189 | 2,597  |
| 231435_at    | C7orf34           | 0,189 | 9,023  |
| 240427_at    | LOC101929050      | 0,189 | 6,546  |
| 1557004_at   | LOC100505902///LC | 0,188 | 3,698  |
| 1560460_at   |                   | 0,188 | 2,205  |
| 217699_at    |                   | 0,188 | 2,554  |
| 234842_at    |                   | 0,188 | 2,939  |
| 236871_s_at  | IQCF4///IQCF3     | 0,188 | 6,951  |
| 237382_at    | COLGALT2          | 0,188 | 2,575  |
| 1568864_at   | MZF1-AS1          | 0,187 | 2,91   |
| 229049_at    | LCMT1-AS2         | 0,187 | 2,424  |
| 1555286_at   | CDKL1             | 0,186 | 19,952 |
| 1556560_a_at | FAM229A           | 0,186 | 3,029  |
| 203527_s_at  | APC               | 0,186 | 2,847  |
| 227399_at    | VGLL3             | 0,186 | 4,32   |
| 230188_at    | NIPAL4            | 0,186 | 2,922  |
| 233815_at    | NAALAD2           | 0,186 | 4,733  |
| 239519_at    |                   | 0,186 | 2,306  |
| 1552974_at   |                   | 0,185 | 4,443  |
| 1555133_at   | FAM9A             | 0,185 | 6,691  |
| 1556641_at   | SLC7A14           | 0,185 | 4,422  |
| 1561425_a_at | ZNF568            | 0,185 | 4,294  |
| 206826_at    | PMP2              | 0,185 | 2,316  |
| 244355_at    | AVL9              | 0,185 | 2,759  |
| 1556689_a_at | WNT4              | 0,184 | 12,894 |
| 1559771_at   |                   | 0,184 | 6,083  |
| 204844_at    | ENPEP             | 0,184 | 2,631  |
| 210824_at    |                   | 0,184 | 10,605 |
| 217380_s_at  | ADD3-AS1          | 0,184 | 2,2    |
| 233051_at    | SLITRK2           | 0,184 | 2,944  |
| 240750_at    |                   | 0,184 | 7,461  |
| 1568852_x_at | LINC01352         | 0,183 | 3,534  |
| 214187_x_at  | CTDSPL            | 0,183 | 3,418  |
| 239417_x_at  | C6orf52           | 0,183 | 3,552  |
| 244821_at    |                   | 0,183 | 6,384  |
| 1570051_at   | RNF144A           | 0,182 | 8,225  |
| 221389_at    | PLA2G2E           | 0,182 | 2,499  |
| 222888_at    | CCNJ              | 0,182 | 7,409  |
| 228262_at    | MAP7D2            | 0,182 | 6,002  |
| 242702_at    | MMAA              | 0,182 | 2,807  |
| 1561217_at   |                   | 0,181 | 5,49   |
| 1562677_at   |                   | 0,181 | 10,792 |
| 1569245_at   | C8orf74           | 0,181 | 2,599  |
| 205943_at    | TDO2              | 0,181 | 6,446  |
| 210781_x_at  | GRIN1             | 0,181 | 7,676  |
| 234385_at    |                   | 0,181 | 3,746  |
| 237000_at    |                   | 0,181 | 2,499  |
| 1554459_s_at | CFHR3             | 0,18  | 6,135  |
| 1556528_at   | LINC00692         | 0,18  | 17,431 |
| 1565242_at   | TNXB              | 0,18  | 12,49  |
| 211705_s_at  | SORBS1            | 0,18  | 5,746  |
| 214837_at    | ALB               | 0,18  | 5,795  |
| 236048_at    | LHFPL1            | 0,18  | 3,617  |
| 239118_at    | KCNA2             | 0,18  | 3,603  |

Tabelle1

|              |                     |       |        |
|--------------|---------------------|-------|--------|
| 1559833_at   | ARHGEF12            | 0,179 | 2,377  |
| 1563265_at   | HNF4A-AS1           | 0,179 | 4,936  |
| 217010_s_at  | CDC25C              | 0,179 | 5,593  |
| 220133_at    | ODAM                | 0,179 | 2,56   |
| 229218_at    | COL1A2              | 0,179 | 6,849  |
| 229964_at    | C9orf152            | 0,179 | 3,578  |
| 233640_x_at  | KRTAP9-4            | 0,179 | 6,961  |
| 237580_at    |                     | 0,179 | 7,038  |
| 242331_x_at  | FRG1JP              | 0,179 | 2,649  |
| 1560151_x_at | SLC29A2             | 0,178 | 2,557  |
| 1565000_a_at | TCP11L2             | 0,178 | 2,256  |
| 221116_at    |                     | 0,178 | 7,81   |
| 240477_at    |                     | 0,178 | 2,624  |
| 1569508_at   | PRDM5               | 0,177 | 2,4    |
| 215601_at    |                     | 0,177 | 10,848 |
| 216568_x_at  |                     | 0,177 | 2,724  |
| 231047_at    |                     | 0,177 | 2,739  |
| 232401_at    | KCNS2               | 0,177 | 2,36   |
| 235717_at    | ZNF229              | 0,177 | 2,338  |
| 240479_at    | HS3ST5              | 0,177 | 8,657  |
| 1558356_at   | UACA                | 0,176 | 2,553  |
| 1562272_at   | LOC101927914        | 0,176 | 2,428  |
| 206481_s_at  | LDB2                | 0,176 | 8,2    |
| 207737_at    |                     | 0,176 | 3,215  |
| 215074_at    | MYO1B               | 0,176 | 2,898  |
| 215799_at    | LOC101927051        | 0,176 | 11,332 |
| 217261_at    | TTTY2B///TTTY2      | 0,176 | 3,3    |
| 234587_at    |                     | 0,176 | 3,507  |
| 237955_at    | C5orf58             | 0,176 | 5,584  |
| 40560_at     | TBX2                | 0,176 | 2,549  |
| 1552684_a_at | SENP8               | 0,175 | 9,106  |
| 202694_at    | STK17A              | 0,175 | 5,542  |
| 210521_s_at  | FETUB               | 0,175 | 13,976 |
| 223525_at    | DLL4                | 0,175 | 2,202  |
| 229745_x_at  | DACT3               | 0,175 | 4,798  |
| 238088_at    |                     | 0,175 | 6,066  |
| 1552714_at   | CREG2               | 0,174 | 4,115  |
| 1555404_a_at | DUOXA1              | 0,174 | 3,839  |
| 229504_at    | RAB23               | 0,174 | 2,35   |
| 234857_at    |                     | 0,174 | 4,097  |
| 236811_at    | DMRTC2              | 0,174 | 2,538  |
| 241209_at    | DCAF6               | 0,174 | 7,906  |
| 243936_x_at  |                     | 0,174 | 3,03   |
| 244407_at    | CYP39A1             | 0,174 | 2,928  |
| 1559840_s_at | TBX18               | 0,173 | 3,946  |
| 202202_s_at  | LAMA4               | 0,173 | 17,468 |
| 206249_at    | MAP3K13             | 0,173 | 2,834  |
| 222166_at    | C9orf16             | 0,173 | 5,106  |
| 237217_at    | ADAMTSL1            | 0,173 | 3,918  |
| 1552914_a_at | CD276               | 0,172 | 3,412  |
| 1556743_at   | ZNF654              | 0,172 | 3,234  |
| 1559842_at   |                     | 0,172 | 10,747 |
| 1566461_at   |                     | 0,172 | 8,994  |
| 208280_at    | CDRT1               | 0,172 | 2,548  |
| 217169_at    | IGHM///IGHG1///IGH- | 0,172 | 2,236  |
| 220388_at    | FER1L4              | 0,172 | 7,13   |
| 221244_s_at  | PDPK1               | 0,172 | 4,074  |
| 221386_at    | OR3A2               | 0,172 | 2,238  |
| 229909_at    | B4GALNT3            | 0,172 | 2,246  |
| 237224_at    | LINC00853           | 0,172 | 33,853 |
| 1555925_at   |                     | 0,171 | 5,099  |
| 1556618_at   | ELK4                | 0,171 | 8,191  |
| 1561443_at   | LOC101928535        | 0,171 | 3,63   |

Tabelle1

|              |                  |       |        |
|--------------|------------------|-------|--------|
| 1566947_at   |                  | 0,171 | 2,201  |
| 1570411_at   | LOC100133131     | 0,171 | 4,689  |
| 209243_s_at  | PEG3             | 0,171 | 2,466  |
| 227955_s_at  | EFNA5            | 0,171 | 2,671  |
| 228102_at    |                  | 0,171 | 2,534  |
| 231341_at    | SLC35D3          | 0,171 | 5,447  |
| 206691_s_at  | PDIA2            | 0,17  | 10,537 |
| 220883_at    | PRO2012          | 0,17  | 2,734  |
| 234211_at    |                  | 0,17  | 5,097  |
| 241585_at    | LRRC4C           | 0,17  | 9,125  |
| 210572_at    | PCDHA2///PCDHA3  | 0,169 | 2,646  |
| 211843_x_at  | CYP3A7-CYP3A51F  | 0,169 | 8,346  |
| 231613_at    | MARK1            | 0,169 | 6,826  |
| 231789_at    | PCDHB15          | 0,169 | 2,574  |
| 233235_x_at  |                  | 0,169 | 7,561  |
| 233968_at    | CST11            | 0,169 | 2,262  |
| 237712_at    | LOC100507562     | 0,169 | 30,519 |
| 1552979_at   | LINC00471        | 0,168 | 2,829  |
| 1553887_at   | SIGLECL1         | 0,168 | 2,858  |
| 1556021_at   | GPR180           | 0,168 | 4,003  |
| 1558778_s_at | MKL2             | 0,168 | 6,233  |
| 210147_at    | ART3             | 0,168 | 2,289  |
| 216896_at    | COL4A3           | 0,168 | 12,918 |
| 228321_s_at  | NAA30            | 0,168 | 4,895  |
| 240100_at    | LOC100505920     | 0,168 | 3,888  |
| 241307_at    |                  | 0,168 | 3,271  |
| 204471_at    | GAP43            | 0,167 | 3,59   |
| 205880_at    | PRKD1            | 0,167 | 3,975  |
| 216076_at    | L3MBTL1          | 0,167 | 2,89   |
| 220561_at    | IGF2-AS          | 0,167 | 2,424  |
| 233416_at    | GNG8             | 0,167 | 16,433 |
| 238608_at    |                  | 0,167 | 13,967 |
| 244667_at    | PRCAT47          | 0,167 | 2,248  |
| 1561429_a_at | MAATS1           | 0,166 | 5,031  |
| 201289_at    | CYR61            | 0,166 | 4,482  |
| 209121_x_at  | NR2F2            | 0,166 | 8,943  |
| 244344_at    | WNK4             | 0,166 | 2,561  |
| 1555725_a_at | RGS5             | 0,165 | 6,948  |
| 1557029_at   | HMMR-AS1         | 0,165 | 5,385  |
| 207967_at    | VPS45            | 0,165 | 3,968  |
| 209465_x_at  | PTN              | 0,165 | 2,919  |
| 226904_at    | SLC6A10P///SLC6A | 0,165 | 7,394  |
| 234015_at    |                  | 0,165 | 2,295  |
| 241339_at    |                  | 0,165 | 4,682  |
| 242252_at    |                  | 0,165 | 3,916  |
| 1559678_s_at | GS1-24F4.2       | 0,164 | 3,302  |
| 221153_s_at  |                  | 0,164 | 4,415  |
| 224022_x_at  | WNT16            | 0,164 | 8,899  |
| 238526_at    | RAB3IP           | 0,164 | 5,514  |
| 240981_at    |                  | 0,164 | 4,024  |
| 242072_at    |                  | 0,164 | 9,819  |
| 242435_at    | PDE4A            | 0,164 | 6,956  |
| 1556842_at   | LOC286087        | 0,163 | 3,36   |
| 1564060_at   | LINC00934        | 0,163 | 2,704  |
| 209990_s_at  | GABBR2           | 0,163 | 3,995  |
| 211116_at    | SLC9A2           | 0,163 | 2,898  |
| 213592_at    | APLNR            | 0,163 | 3,404  |
| 219121_s_at  | ESRP1            | 0,163 | 4,406  |
| 223913_s_at  | MIR7-3HG         | 0,163 | 6,956  |
| 231751_at    | ABCG8            | 0,163 | 5,337  |
| 215613_at    | ADAM12           | 0,162 | 2,47   |
| 216259_at    | LOC100506699     | 0,162 | 2,706  |
| 237988_at    | EIF1B            | 0,162 | 3,683  |

Tabelle1

|              |                   |       |        |
|--------------|-------------------|-------|--------|
| 243478_at    | CHST2             | 0,162 | 11,177 |
| 1555367_at   | LOC285902///ZNF47 | 0,161 | 3,493  |
| 1556823_s_at |                   | 0,161 | 4,225  |
| 1558076_at   | SLF1              | 0,161 | 7,907  |
| 1559571_a_at | ATP13A4           | 0,161 | 2,295  |
| 1559871_s_at | LOC100129129      | 0,161 | 9,145  |
| 1561122_a_at | RAD51B            | 0,161 | 2,592  |
| 1561422_at   | LOC101928727      | 0,161 | 2,463  |
| 215315_at    | ZNF549            | 0,161 | 2,322  |
| 234453_s_at  | LRRC74A           | 0,161 | 6,41   |
| 236640_at    | LOC100507165      | 0,161 | 3,013  |
| 1560889_a_at |                   | 0,16  | 4,969  |
| 1565657_at   | CMTM6             | 0,16  | 3,532  |
| 1566181_at   |                   | 0,16  | 6,401  |
| 210261_at    | KCNK2             | 0,16  | 7,105  |
| 216160_at    |                   | 0,16  | 2,21   |
| 230094_at    | KLF13             | 0,16  | 11,042 |
| 230644_at    | LRFN5             | 0,16  | 2,991  |
| 235485_at    | WDR44             | 0,16  | 4,668  |
| 236791_at    |                   | 0,16  | 8,424  |
| 239126_at    | CIRBP-AS1         | 0,16  | 2,526  |
| 1556886_a_at | LAYN              | 0,159 | 2,604  |
| 206144_at    | MAGI1             | 0,159 | 2,359  |
| 215194_at    | PRKCA             | 0,159 | 6,504  |
| 229953_x_at  | LCA5              | 0,159 | 38,092 |
| 1556916_a_at | LOC101928651      | 0,158 | 3,431  |
| 208145_at    |                   | 0,158 | 3,057  |
| 217341_at    | DNM1              | 0,158 | 2,295  |
| 241239_at    | EPN2-IT1///EPN2   | 0,158 | 13,702 |
| 1552458_at   | MBD3L1            | 0,157 | 2,674  |
| 1559280_a_at | APELA             | 0,157 | 15,052 |
| 1570385_at   |                   | 0,157 | 4,713  |
| 207744_at    |                   | 0,157 | 6,788  |
| 230365_at    | LIN9              | 0,157 | 8,768  |
| 1556233_s_at | KIF6              | 0,156 | 4,841  |
| 1563797_at   |                   | 0,156 | 4,235  |
| 1569102_at   | ABCA4             | 0,156 | 4,838  |
| 201372_s_at  | CUL3              | 0,156 | 3,472  |
| 228431_at    | NFYA              | 0,156 | 6,766  |
| 233548_at    |                   | 0,156 | 2,31   |
| 234821_at    | LOC101929645      | 0,156 | 4,284  |
| 234901_at    |                   | 0,156 | 3,332  |
| 1555394_at   | PIGK              | 0,155 | 3,41   |
| 1557002_x_at | ESPNL             | 0,155 | 2,889  |
| 1562477_at   | EBF2              | 0,155 | 2,637  |
| 204597_x_at  | STC1              | 0,155 | 2,491  |
| 205589_at    | MYL3              | 0,155 | 4,288  |
| 215010_s_at  | BRSK2             | 0,155 | 4,289  |
| 216289_at    | ADGRD2            | 0,155 | 2,278  |
| 220986_s_at  | TIGD6             | 0,155 | 2,782  |
| 230991_at    | LOC102724156      | 0,155 | 4,039  |
| 231097_at    |                   | 0,155 | 4,473  |
| 232880_at    |                   | 0,155 | 2,191  |
| 1557334_a_at | MCM8-AS1          | 0,154 | 3,439  |
| 1559409_a_at | CC2D2A            | 0,154 | 2,721  |
| 242166_at    |                   | 0,154 | 3,992  |
| 206627_s_at  | SSX1              | 0,153 | 5,923  |
| 210990_s_at  | LAMA4             | 0,153 | 7,85   |
| 219604_s_at  | ZNF3              | 0,153 | 13,324 |
| 222019_at    | MIR6834///PFDN6   | 0,153 | 2,594  |
| 224110_at    | PRO1804           | 0,153 | 2,957  |
| 229230_at    | SLC51A            | 0,153 | 2,355  |
| 232041_at    | PATJ              | 0,153 | 4,459  |

Tabelle1

|              |                    |       |        |
|--------------|--------------------|-------|--------|
| 237508_at    |                    | 0,153 | 3,401  |
| 243390_at    |                    | 0,153 | 15,667 |
| 1556921_at   | LOC101927138       | 0,152 | 2,454  |
| 1562469_at   | CASC15             | 0,152 | 4,355  |
| 207201_s_at  | SLC22A1            | 0,152 | 2,599  |
| 216245_at    | IL1RN              | 0,152 | 4,8    |
| 236279_at    |                    | 0,152 | 2,541  |
| 237137_at    | SCARNA2            | 0,152 | 3,53   |
| 244505_at    | LOC102724537       | 0,152 | 4,845  |
| 205431_s_at  | BMP5               | 0,151 | 2,71   |
| 234784_at    |                    | 0,151 | 3,428  |
| 1560409_at   |                    | 0,15  | 3,819  |
| 1563856_at   |                    | 0,15  | 7,616  |
| 215199_at    | CALD1              | 0,15  | 4,493  |
| 216820_at    |                    | 0,15  | 13,885 |
| 230181_at    | PQLC1              | 0,15  | 5,01   |
| 237098_at    | C1orf21            | 0,15  | 5,347  |
| 205149_s_at  | CLCN4              | 0,149 | 8,496  |
| 207448_at    | POFUT2             | 0,149 | 16,413 |
| 212883_at    |                    | 0,149 | 2,42   |
| 220614_s_at  | ADGB               | 0,149 | 16,239 |
| 230153_at    | NEK9               | 0,149 | 10,246 |
| 1553461_at   | FAM9B              | 0,147 | 3,065  |
| 1555369_at   | BAGE               | 0,147 | 4,685  |
| 201983_s_at  | EGFR               | 0,147 | 2,578  |
| 209955_s_at  | FAP                | 0,147 | 4,873  |
| 241110_at    |                    | 0,147 | 14,04  |
| 1560493_a_at | CPXCR1             | 0,146 | 2,513  |
| 1565769_at   |                    | 0,146 | 6,197  |
| 1565939_at   | C5orf22            | 0,146 | 4,055  |
| 210035_s_at  | SNORA66///RPL5///: | 0,146 | 12,934 |
| 217066_s_at  | DMPK               | 0,146 | 4,527  |
| 221362_at    | HTR5A              | 0,146 | 3,595  |
| 1556404_a_at | ZNRFP2P1           | 0,145 | 6,244  |
| 1557690_x_at |                    | 0,145 | 2,62   |
| 1568698_at   | TMEM232            | 0,145 | 3,843  |
| 204694_at    | AFP                | 0,145 | 17,754 |
| 242006_at    | LCA5               | 0,145 | 5,036  |
| 1553268_at   | RHBDL3             | 0,144 | 6,215  |
| 210850_s_at  | ELK1               | 0,144 | 2,622  |
| 228975_at    | SP6                | 0,144 | 2,83   |
| 240164_at    | MUC4               | 0,144 | 2,788  |
| 240896_at    |                    | 0,144 | 4,534  |
| 40687_at     | GJA4               | 0,144 | 2,456  |
| 1556856_at   |                    | 0,143 | 5,987  |
| 217522_at    | KCNV2              | 0,143 | 2,457  |
| 221001_at    |                    | 0,143 | 2,191  |
| 244405_s_at  |                    | 0,143 | 2,321  |
| 1562864_at   | PACRG-AS2          | 0,142 | 8,623  |
| 216895_at    | GABRG3             | 0,142 | 5,449  |
| 222822_s_at  | MMRN2              | 0,142 | 7,108  |
| 240583_at    | RIOK3              | 0,142 | 3,058  |
| 244323_at    | BHLHE22            | 0,142 | 3,954  |
| 1563822_at   | LOC100131763       | 0,141 | 4,239  |
| 217000_at    |                    | 0,141 | 3,975  |
| 234510_at    |                    | 0,141 | 2,859  |
| 234920_at    | ZNF7               | 0,141 | 9,043  |
| 242205_at    |                    | 0,141 | 2,542  |
| 244656_at    | RASL10B            | 0,141 | 3,515  |
| 1560063_a_at |                    | 0,14  | 9,919  |
| 209956_s_at  | CAMK2B             | 0,14  | 2,275  |
| 215042_at    | BMP6               | 0,14  | 2,573  |
| 220107_s_at  | ZC2HC1C            | 0,14  | 2,851  |

Tabelle1

|              |                   |       |        |
|--------------|-------------------|-------|--------|
| 243901_at    | ALDOB             | 0,14  | 8,859  |
| 1569910_at   |                   | 0,139 | 2,362  |
| 211480_s_at  | SLCO1A2           | 0,139 | 4,18   |
| 231687_at    | ERICH3-AS1        | 0,139 | 4,927  |
| 231928_at    | HES2              | 0,139 | 11,182 |
| 237164_at    |                   | 0,139 | 7,788  |
| 1552948_at   | CCDC27            | 0,138 | 2,876  |
| 1558179_at   | ATP5J2            | 0,138 | 4,015  |
| 1564385_at   | LOC219688         | 0,138 | 3,78   |
| 1569878_at   | CCNYL2            | 0,138 | 10,525 |
| 231536_at    |                   | 0,138 | 5,854  |
| 206224_at    | CST1              | 0,137 | 6,4    |
| 216793_x_at  | LOC100289518      | 0,137 | 5,089  |
| 220540_at    | KCNK15            | 0,137 | 12,556 |
| 231461_at    | KRT71             | 0,137 | 10,937 |
| 231511_at    | FRAS1             | 0,137 | 2,29   |
| 239889_at    | SERP2             | 0,137 | 6,085  |
| 1555708_a_at | OFCC1             | 0,136 | 2,457  |
| 1558852_at   |                   | 0,136 | 3,205  |
| 1562035_at   |                   | 0,136 | 2,645  |
| 1562232_at   |                   | 0,136 | 2,561  |
| 205697_at    | SCGN              | 0,136 | 2,621  |
| 222247_at    |                   | 0,136 | 4,589  |
| 231624_s_at  |                   | 0,136 | 4,781  |
| 235506_at    |                   | 0,136 | 2,648  |
| 1570633_at   |                   | 0,135 | 3,365  |
| 207447_s_at  | MGAT4C            | 0,135 | 13,367 |
| 207639_at    | FZD9              | 0,135 | 2,187  |
| 237697_at    | LOC101928269///LC | 0,135 | 3,826  |
| 241759_at    | KCNK15-AS1        | 0,135 | 2,884  |
| 1557403_s_at |                   | 0,134 | 15,391 |
| 1560861_at   | THRA1/BTR         | 0,134 | 5,789  |
| 1562084_at   |                   | 0,134 | 4,227  |
| 1569365_a_at | KIAA1656          | 0,134 | 3,359  |
| 222100_at    | CYP2E1            | 0,134 | 3,248  |
| 233165_at    | NCKIPSD           | 0,134 | 3,768  |
| 236159_x_at  |                   | 0,134 | 4,567  |
| 242493_at    | PTPRD             | 0,134 | 9,913  |
| 1566209_at   |                   | 0,133 | 16,341 |
| 1567068_at   | OR4D1             | 0,133 | 6,159  |
| 214600_at    | TEAD1             | 0,133 | 2,379  |
| 232111_at    | TUNAR             | 0,133 | 3,452  |
| 236767_at    | IQCF2             | 0,133 | 3,147  |
| 1564949_at   |                   | 0,132 | 4,681  |
| 222117_s_at  | ADCK2             | 0,132 | 2,343  |
| 224094_at    |                   | 0,132 | 2,529  |
| 243769_at    |                   | 0,132 | 3,137  |
| 1562016_at   |                   | 0,131 | 5,162  |
| 1564468_at   |                   | 0,131 | 4,024  |
| 205989_s_at  | MOG               | 0,131 | 4,057  |
| 207083_s_at  | CC2D1A            | 0,131 | 2,807  |
| 215634_at    |                   | 0,131 | 4,557  |
| 219134_at    | ADGRL4            | 0,131 | 17,755 |
| 229233_at    | NRG3              | 0,131 | 7,846  |
| 240496_at    |                   | 0,131 | 2,896  |
| 1559245_at   |                   | 0,13  | 2,953  |
| 1559394_a_at |                   | 0,13  | 2,24   |
| 1564235_at   | LOC729866         | 0,13  | 8,479  |
| 209351_at    | KRT14             | 0,13  | 10,565 |
| 211164_at    | EPHA3             | 0,13  | 5,65   |
| 216619_at    | LOC101927446///G1 | 0,13  | 2,984  |
| 237644_at    |                   | 0,13  | 5,903  |
| 1555716_a_at | CXADR             | 0,129 | 13,936 |

Tabelle1

|              |              |       |        |
|--------------|--------------|-------|--------|
| 1558653_at   | MLK7-AS1     | 0,129 | 5,862  |
| 216656_at    |              | 0,129 | 8,069  |
| 223030_at    | TRAF7        | 0,129 | 5,525  |
| 234537_at    |              | 0,129 | 4,968  |
| 239971_at    |              | 0,129 | 3,226  |
| 1553444_a_at | C1orf127     | 0,128 | 4,938  |
| 1554337_at   | FARP2        | 0,128 | 2,367  |
| 1564212_at   | LOC101929762 | 0,128 | 2,348  |
| 1569955_at   | LOC101928893 | 0,128 | 7,163  |
| 218975_at    | COL5A3       | 0,128 | 7,233  |
| 230975_at    |              | 0,128 | 3,743  |
| 234871_at    | ADGRV1       | 0,128 | 4,105  |
| 236960_at    |              | 0,128 | 6,293  |
| 237248_at    | PDE11A       | 0,128 | 2,635  |
| 237520_x_at  |              | 0,128 | 14,999 |
| 241424_at    | ELAVL4       | 0,128 | 5,581  |
| 1553071_a_at | MYOZ3        | 0,127 | 2,947  |
| 1556964_s_at |              | 0,127 | 2,707  |
| 1561493_at   | LOC105370832 | 0,127 | 5,36   |
| 202490_at    | IKBKAP       | 0,127 | 3,979  |
| 217248_s_at  | SLC7A8       | 0,127 | 2,309  |
| 231665_at    | ARG1         | 0,127 | 11,131 |
| 234494_x_at  |              | 0,127 | 3,35   |
| 236936_at    |              | 0,127 | 2,341  |
| 237050_at    |              | 0,127 | 5,45   |
| 241044_x_at  |              | 0,127 | 5,872  |
| 1560987_a_at |              | 0,126 | 2,761  |
| 204637_at    | CGA          | 0,126 | 2,444  |
| 214863_at    |              | 0,126 | 8,104  |
| 237139_at    | PDE9A        | 0,126 | 4,123  |
| 238133_at    |              | 0,126 | 2,339  |
| 240557_at    | TSC22D2      | 0,126 | 5,362  |
| 244671_at    |              | 0,126 | 3,061  |
| 216131_at    | FRMD4B       | 0,125 | 7,148  |
| 216772_at    | LOC101926997 | 0,125 | 2,712  |
| 1559661_at   | TENM3        | 0,124 | 3,197  |
| 1562747_at   | LOC101928101 | 0,124 | 4,116  |
| 222455_s_at  | PARVA        | 0,124 | 3,815  |
| 231080_at    | CDAN1        | 0,124 | 5,265  |
| 231314_at    |              | 0,124 | 3,048  |
| 231410_at    |              | 0,124 | 4,073  |
| 237583_at    |              | 0,124 | 7,186  |
| 239502_at    |              | 0,124 | 2,423  |
| 1552368_at   | CTCF         | 0,123 | 3,3    |
| 1553556_at   | TAS2R40      | 0,123 | 6,538  |
| 1560548_at   | LINC00382    | 0,123 | 2,941  |
| 205073_at    | CYP2J2       | 0,123 | 11,373 |
| 216513_at    | DCT          | 0,123 | 4,646  |
| 217344_at    |              | 0,123 | 4,467  |
| 224463_s_at  | C11orf70     | 0,123 | 6,487  |
| 237551_at    |              | 0,123 | 17,673 |
| 1561613_at   |              | 0,122 | 4,78   |
| 215414_at    | FARS2        | 0,122 | 3,77   |
| 216797_at    |              | 0,122 | 2,582  |
| 234075_at    |              | 0,122 | 17,831 |
| 238160_at    | ACOT12       | 0,122 | 3,041  |
| 240858_at    |              | 0,122 | 5,041  |
| 1552912_a_at | IL23R        | 0,121 | 13,022 |
| 1558725_at   | SRRM3        | 0,121 | 5,012  |
| 1562236_at   | KAT6B        | 0,121 | 3,319  |
| 1570205_at   |              | 0,121 | 2,321  |
| 222069_s_at  | RIN3         | 0,121 | 15,487 |
| 234805_at    |              | 0,121 | 2,608  |



Tabelle1

|              |                  |       |        |
|--------------|------------------|-------|--------|
| 244146_at    | DTWD1            | 0,121 | 4,072  |
| 1556770_a_at | FBXL13           | 0,12  | 6,024  |
| 1559583_at   | CD276            | 0,12  | 2,452  |
| 205623_at    | ALDH3A1          | 0,12  | 2,918  |
| 221399_at    | EDA2R            | 0,12  | 13,473 |
| 221796_at    | NTRK2            | 0,12  | 4,546  |
| 226930_at    | FNDC1            | 0,12  | 3,577  |
| 233139_at    |                  | 0,12  | 2,837  |
| 239974_at    | LOC728095        | 0,12  | 5,062  |
| 1554308_s_at | GABRA2           | 0,119 | 2,723  |
| 1557417_s_at | RSPH10B2///RSPH' | 0,119 | 3,264  |
| 212029_s_at  | PTOV1-AS2        | 0,119 | 6,743  |
| 228784_at    | ST3GAL2          | 0,119 | 2,7    |
| 234172_at    |                  | 0,119 | 3,08   |
| 234548_at    |                  | 0,119 | 11,242 |
| 242880_at    | NALCN            | 0,119 | 3,136  |
| 231210_at    | MAJIN            | 0,118 | 2,604  |
| 241101_at    | LOC105377143     | 0,118 | 2,333  |
| 244664_at    | ZNF530           | 0,118 | 6,827  |
| 1560790_at   | GOLGA6L2         | 0,117 | 3,486  |
| 1561328_at   | MIR3663HG        | 0,117 | 12,03  |
| 1561906_at   |                  | 0,117 | 3,636  |
| 1567860_at   |                  | 0,117 | 2,371  |
| 227804_at    | TLCD1            | 0,117 | 2,393  |
| 236151_at    | SRRM4            | 0,117 | 3,023  |
| 244311_at    |                  | 0,117 | 5,834  |
| 1556804_s_at | POLR3B           | 0,116 | 16,729 |
| 1561341_at   |                  | 0,116 | 2,24   |
| 1561867_at   |                  | 0,116 | 2,847  |
| 205876_at    | LIFR             | 0,116 | 2,376  |
| 237182_at    | MRPL45P2         | 0,116 | 3,021  |
| 1561927_at   | ANKUB1           | 0,115 | 5,387  |
| 1570506_at   |                  | 0,115 | 15,088 |
| 215751_at    | RBM26            | 0,115 | 2,527  |
| 222928_s_at  | FAM160B2         | 0,115 | 12,464 |
| 242575_at    | SMG7             | 0,115 | 3,093  |
| 1552502_s_at | RHBDL2           | 0,114 | 2,254  |
| 1553390_at   | ATG9B            | 0,114 | 2,316  |
| 1559760_at   | LOC401220        | 0,114 | 4,356  |
| 1561104_at   | LOC101926962     | 0,114 | 2,786  |
| 1562165_at   |                  | 0,114 | 3,808  |
| 1564905_at   |                  | 0,114 | 4,944  |
| 1553494_at   | TDH              | 0,113 | 17,805 |
| 1559438_at   | C21orf58         | 0,113 | 4,08   |
| 1565638_at   | PMP22            | 0,113 | 10,204 |
| 1568822_at   | MTG2             | 0,113 | 3,759  |
| 206054_at    | KNG1             | 0,113 | 4,558  |
| 207626_s_at  | SLC7A2           | 0,113 | 7,375  |
| 232313_at    | TMEM132C         | 0,113 | 14,463 |
| 237116_at    | LOC646903        | 0,113 | 2,602  |
| 1565737_at   | SCTR             | 0,112 | 2,266  |
| 1555471_a_at | FMN2             | 0,111 | 12,514 |
| 1556616_a_at | KLHDC4           | 0,111 | 3,834  |
| 1557735_at   |                  | 0,111 | 4,992  |
| 224092_at    | BARHL1           | 0,111 | 13,23  |
| 238254_at    | ZNF677           | 0,111 | 2,897  |
| 242127_at    |                  | 0,111 | 17,212 |
| 1554725_at   | RABGAP1L         | 0,11  | 13,176 |
| 1560756_at   |                  | 0,11  | 8,334  |
| 1564134_at   |                  | 0,11  | 4,344  |
| 231219_at    | CMTM1            | 0,11  | 4,055  |
| 234793_at    |                  | 0,11  | 5,999  |
| 237298_at    | FLJ26850         | 0,11  | 2,661  |

Tabelle1

|              |                   |       |        |
|--------------|-------------------|-------|--------|
| 244121_at    | UBR3              | 0,11  | 17,798 |
| 244412_at    |                   | 0,11  | 2,81   |
| 244867_at    |                   | 0,11  | 10,619 |
| 1552708_a_at | DUSP19            | 0,109 | 2,475  |
| 1555364_at   | C11orf58          | 0,109 | 4,537  |
| 1560118_at   |                   | 0,109 | 3,224  |
| 203862_s_at  | ACTN2             | 0,109 | 4,465  |
| 214169_at    | SUN1              | 0,109 | 2,395  |
| 215344_at    |                   | 0,109 | 3,645  |
| 215682_at    | LOC440792         | 0,109 | 2,953  |
| 216764_at    |                   | 0,109 | 3,099  |
| 218736_s_at  | PALMD             | 0,109 | 9,522  |
| 230834_at    |                   | 0,109 | 3,769  |
| 233586_s_at  | KLK12             | 0,109 | 2,467  |
| 239777_at    | LINC01588         | 0,109 | 2,363  |
| 1558587_at   | LOC100996385      | 0,108 | 3,074  |
| 219196_at    | SCG3              | 0,108 | 4,336  |
| 222959_at    | CNGB3             | 0,108 | 10,09  |
| 234627_at    | FLJ21408          | 0,108 | 15,712 |
| 238268_at    |                   | 0,108 | 5,401  |
| 240517_at    | CBS               | 0,108 | 2,455  |
| 1560906_at   |                   | 0,107 | 4,324  |
| 206869_at    | CHAD              | 0,107 | 9,946  |
| 208166_at    | MMP16             | 0,107 | 4,124  |
| 239712_at    | CCDC171           | 0,107 | 5,48   |
| 239961_at    |                   | 0,107 | 3,24   |
| 244866_at    |                   | 0,107 | 7,376  |
| 1570537_a_at | LOC101928902      | 0,106 | 6,64   |
| 214089_at    | RPS8              | 0,106 | 13,879 |
| 219950_s_at  | TIAM2             | 0,106 | 2,477  |
| 224940_s_at  | PAPPA             | 0,106 | 9,769  |
| 232783_at    |                   | 0,106 | 2,338  |
| 244727_at    | LOC101927338///KC | 0,106 | 2,596  |
| 1554825_at   |                   | 0,105 | 3,226  |
| 1563450_at   | DEFB107B///DEFB1  | 0,105 | 12,923 |
| 1566862_at   |                   | 0,105 | 4,128  |
| 206384_at    | CACNG3            | 0,105 | 3,878  |
| 210884_s_at  | SPAG11A           | 0,105 | 4,267  |
| 224370_s_at  | CAPS2             | 0,105 | 2,65   |
| 231084_at    | CFAP43            | 0,105 | 4,109  |
| 240466_at    |                   | 0,105 | 4,243  |
| 242173_at    | PLD5              | 0,105 | 5,771  |
| 1563135_at   | LOC101927616      | 0,104 | 2,212  |
| 210141_s_at  | INHA              | 0,104 | 7,891  |
| 215675_at    | TEF               | 0,104 | 2,534  |
| 221146_at    |                   | 0,104 | 3,022  |
| 235098_at    | PEX26             | 0,104 | 2,297  |
| 240743_at    |                   | 0,104 | 4,363  |
| 244829_at    | LINC00518         | 0,104 | 2,408  |
| 1561622_at   | LOC101928314      | 0,103 | 8,532  |
| 216328_at    | SIGLEC8           | 0,103 | 3,42   |
| 227794_at    | LOC100287413///GI | 0,103 | 5,135  |
| 234679_at    | KRTAP9-3          | 0,103 | 4,77   |
| 241169_at    |                   | 0,103 | 2,785  |
| 241423_at    | ZBED3-AS1         | 0,103 | 6,388  |
| 1556990_at   | PERP              | 0,102 | 8,262  |
| 235265_at    | UBR3              | 0,102 | 3,733  |
| 1556364_at   | ADAMTS9-AS2       | 0,101 | 4,808  |
| 232941_at    | TMPRSS6           | 0,101 | 5,704  |
| 233688_at    | KCNIP3            | 0,101 | 7,656  |
| 234595_at    | CATX-1            | 0,101 | 13,239 |
| 1564803_at   | KRTAP11-1         | 0,1   | 2,308  |
| 216339_s_at  | TNXB///TNXA       | 0,1   | 2,309  |

Tabelle1

|              |               |       |        |
|--------------|---------------|-------|--------|
| 221054_s_at  | TCL6          | 0,1   | 2,86   |
| 221127_s_at  | DKK3          | 0,1   | 4,44   |
| 231105_at    |               | 0,1   | 2,472  |
| 234100_at    |               | 0,1   | 6,83   |
| 240817_at    | LOC101929034  | 0,1   | 7,181  |
| 1554398_at   | LYG2          | 0,099 | 7,672  |
| 1554797_at   | SYT16         | 0,099 | 2,706  |
| 1566481_at   |               | 0,099 | 7,463  |
| 202935_s_at  | SOX9          | 0,099 | 7,434  |
| 206651_s_at  | CPB2          | 0,099 | 2,718  |
| 231442_at    | ZPBP2         | 0,099 | 3,666  |
| 232638_at    | COL20A1       | 0,099 | 2,307  |
| 234200_at    |               | 0,099 | 2,588  |
| 237890_at    |               | 0,099 | 24,547 |
| 239854_at    | SYCE3         | 0,099 | 2,502  |
| 240379_at    | PKP4          | 0,099 | 5,956  |
| 243974_at    |               | 0,099 | 4,711  |
| 1560416_at   | DNAH11        | 0,098 | 6,122  |
| 1561260_at   |               | 0,098 | 3,919  |
| 1564590_a_at | OFCC1         | 0,098 | 2,681  |
| 215835_at    | SCARB1        | 0,098 | 5,358  |
| 217400_at    |               | 0,098 | 7,335  |
| 230497_at    | CELF5         | 0,098 | 2,522  |
| 231091_x_at  |               | 0,098 | 2,182  |
| 241547_at    | A1CF          | 0,098 | 3,039  |
| 241782_at    | NEBL          | 0,098 | 3,426  |
| 1554558_at   | DCAF5         | 0,097 | 3,259  |
| 1561468_at   |               | 0,097 | 2,192  |
| 203824_at    | TSPAN8        | 0,097 | 2,248  |
| 237427_at    |               | 0,097 | 3,455  |
| 240852_at    |               | 0,097 | 9,044  |
| 242629_at    | RAB3B         | 0,097 | 4,269  |
| 1554882_at   | ERCC8         | 0,096 | 5,96   |
| 1559092_at   | SLC9A5        | 0,096 | 2,309  |
| 1560062_at   | SLC29A2       | 0,096 | 3,464  |
| 1561519_at   | LOC101927346  | 0,096 | 2,376  |
| 1565338_x_at | DNAH6         | 0,096 | 2,488  |
| 1569283_at   | ZNF891        | 0,096 | 5,994  |
| 1569528_at   | LOC105375240  | 0,096 | 7,723  |
| 214827_at    | PARD6B        | 0,096 | 3,308  |
| 220848_x_at  | OBP2A         | 0,096 | 4,382  |
| 231229_at    | HILS1         | 0,096 | 3,304  |
| 240075_at    | LOC101927417  | 0,096 | 3,974  |
| 243572_at    |               | 0,096 | 3,954  |
| 1556267_at   | MYRFL         | 0,095 | 8,141  |
| 1562480_at   |               | 0,095 | 17,733 |
| 211298_s_at  | ALB           | 0,095 | 5,117  |
| 216519_s_at  | PROSC         | 0,095 | 8,325  |
| 243273_at    |               | 0,095 | 3,435  |
| 244017_at    |               | 0,095 | 4,998  |
| 244275_at    | CISD2         | 0,095 | 9,883  |
| 1556997_a_at | LEPROT///LEPR | 0,094 | 3,686  |
| 1561853_a_at | IL23R         | 0,094 | 3,906  |
| 1566289_at   | OR2M4         | 0,094 | 2,492  |
| 230307_at    | SLC25A21-AS1  | 0,094 | 3,62   |
| 231007_at    |               | 0,094 | 4,273  |
| 1553859_at   | TPH1          | 0,093 | 4,592  |
| 206984_s_at  | RIT2          | 0,093 | 2,97   |
| 237939_at    | EPHA5         | 0,093 | 4,935  |
| 34471_at     | MYH8          | 0,093 | 3,428  |
| 1553734_at   | AK7           | 0,092 | 4,169  |
| 1566150_at   | CALML4        | 0,092 | 3,769  |
| 215941_at    |               | 0,092 | 5,149  |

Tabelle1

|              |                 |       |        |
|--------------|-----------------|-------|--------|
| 219612_s_at  | FGG             | 0,092 | 6,533  |
| 221993_s_at  | TSR3            | 0,092 | 6,064  |
| 224409_s_at  | TSSK6           | 0,092 | 16,09  |
| 1556695_a_at | NR2F1-AS1       | 0,091 | 22,957 |
| 1563376_at   | LOC101929174    | 0,091 | 2,482  |
| 1553303_at   | C16orf46        | 0,09  | 2,359  |
| 1553601_a_at | TMIE            | 0,09  | 5,595  |
| 1555346_at   | CDC20B          | 0,09  | 2,561  |
| 1565583_at   | ZSCAN5A         | 0,09  | 13,084 |
| 215827_x_at  | CROCCP3         | 0,09  | 9,945  |
| 227989_at    | LTBP4           | 0,09  | 3,704  |
| 228748_at    | CD59            | 0,09  | 7,842  |
| 234017_at    | LINC00923       | 0,09  | 3,038  |
| 240537_s_at  | CDIPT-AS1       | 0,09  | 2,842  |
| 211265_at    | PTGER3          | 0,089 | 3,391  |
| 211877_s_at  | PCDHGA11///PCDH | 0,089 | 9,722  |
| 236670_s_at  |                 | 0,089 | 5,523  |
| 238991_at    | ASB1            | 0,089 | 3,559  |
| 243391_x_at  |                 | 0,089 | 3,76   |
| 1558160_at   | CCDC171         | 0,088 | 9,876  |
| 215465_at    | ABCA12          | 0,088 | 10,021 |
| 229051_at    |                 | 0,088 | 2,338  |
| 232119_at    | SYNPO2          | 0,088 | 2,296  |
| 241235_at    |                 | 0,088 | 2,408  |
| 244651_at    |                 | 0,088 | 5,154  |
| 1556134_a_at | B3GNT5          | 0,087 | 2,199  |
| 1562044_at   | LOC101928580    | 0,087 | 2,721  |
| 1563128_at   |                 | 0,087 | 10,048 |
| 206153_at    | CYP4F11         | 0,087 | 6,786  |
| 207739_s_at  | GAGE12D///GAGE8 | 0,087 | 2,974  |
| 214021_x_at  | ITGB5           | 0,087 | 2,282  |
| 233858_at    |                 | 0,087 | 3,006  |
| 205421_at    | SLC22A3         | 0,086 | 17,681 |
| 240069_at    | LOC102724880    | 0,086 | 2,409  |
| 1557641_at   |                 | 0,085 | 6,225  |
| 1561420_a_at | LOC101927051    | 0,085 | 10,853 |
| 1562017_at   | LOC100130654    | 0,085 | 2,446  |
| 210560_at    | GBX2            | 0,085 | 12,722 |
| 215108_x_at  | TOX3            | 0,085 | 5,898  |
| 220380_at    | DNASE2B         | 0,085 | 9,203  |
| 243142_at    | FGD6            | 0,085 | 8,21   |
| 1555403_a_at | CDH19           | 0,084 | 3,879  |
| 1560220_a_at | CBY1            | 0,084 | 7,434  |
| 1569661_at   | NPAS3           | 0,084 | 10,257 |
| 208330_at    | ALX4            | 0,084 | 3,306  |
| 233901_at    |                 | 0,084 | 5,153  |
| 1556847_s_at |                 | 0,083 | 5,704  |
| 214952_at    | NCAM1           | 0,083 | 13,734 |
| 227958_s_at  | GSN             | 0,083 | 2,221  |
| 236677_at    | NGB             | 0,083 | 6,799  |
| 237557_at    |                 | 0,083 | 2,519  |
| 1564932_at   |                 | 0,082 | 2,201  |
| 213972_at    |                 | 0,082 | 4,545  |
| 216802_at    |                 | 0,082 | 5,843  |
| 217021_at    | CYB5A           | 0,082 | 14,646 |
| 226814_at    | ADAMTS9         | 0,082 | 5,11   |
| 233594_at    | ISPD-AS1        | 0,082 | 3,852  |
| 233801_s_at  | SEMA6D          | 0,082 | 11,94  |
| 237335_at    | ZP1             | 0,082 | 5,541  |
| 239262_at    |                 | 0,082 | 4,531  |
| 241685_x_at  | PURA            | 0,082 | 14,202 |
| 1570231_at   | LATS1           | 0,081 | 4,072  |
| 202986_at    | ARNT2           | 0,081 | 4,226  |

Tabelle1

|              |                 |       |        |
|--------------|-----------------|-------|--------|
| 205523_at    | HAPLN1          | 0,081 | 3,357  |
| 226937_at    | CRLS1           | 0,081 | 2,2    |
| 243297_at    |                 | 0,081 | 2,911  |
| 1560373_a_at | LOC101929713    | 0,08  | 5,362  |
| 1564851_at   |                 | 0,08  | 15,667 |
| 231881_at    | CALD1           | 0,08  | 3,525  |
| 237970_at    |                 | 0,08  | 2,432  |
| 241404_at    |                 | 0,08  | 3,692  |
| 1555538_s_at | FAM9B           | 0,079 | 19,423 |
| 1564244_a_at | LARGE-AS1       | 0,079 | 5,895  |
| 1564744_at   |                 | 0,079 | 4,165  |
| 206447_at    | CELA2A///CELA2B | 0,079 | 5,608  |
| 240317_at    | PCDHB4          | 0,079 | 3,32   |
| 216124_at    |                 | 0,078 | 2,692  |
| 231551_at    | C1orf234        | 0,078 | 4,861  |
| 234557_at    |                 | 0,078 | 2,237  |
| 241521_at    |                 | 0,078 | 6,502  |
| 1556220_at   |                 | 0,077 | 2,417  |
| 204469_at    | PTPRZ1          | 0,077 | 3,654  |
| 205951_at    | MYH1            | 0,077 | 4,049  |
| 210599_at    | ZNF614          | 0,077 | 3,636  |
| 219773_at    | NOX4            | 0,077 | 3,229  |
| 230964_at    | FREM2           | 0,077 | 2,827  |
| 231615_at    |                 | 0,077 | 3,365  |
| 237801_at    |                 | 0,077 | 5,458  |
| 239319_at    | LINC00992       | 0,077 | 2,593  |
| 244314_at    |                 | 0,077 | 16,954 |
| 1553938_a_at | STK32A          | 0,076 | 5,095  |
| 1559458_at   | LTBR            | 0,076 | 3,026  |
| 237149_at    |                 | 0,076 | 17,563 |
| 244888_at    |                 | 0,076 | 3,282  |
| 1559402_a_at | C1orf61         | 0,075 | 4,777  |
| 1563546_at   |                 | 0,075 | 16,156 |
| 206476_s_at  | NOVA2           | 0,075 | 3,724  |
| 230763_at    | SPATA17         | 0,075 | 3,312  |
| 239065_at    | DNAJC22         | 0,075 | 4,507  |
| 241434_at    | IPP             | 0,075 | 17,097 |
| 1557296_at   | FLJ12825        | 0,074 | 2,303  |
| 233542_at    |                 | 0,074 | 7,787  |
| 1552466_x_at | LINC00161       | 0,073 | 17,563 |
| 1554485_s_at | TMEM37          | 0,073 | 6,179  |
| 229216_s_at  |                 | 0,073 | 5,82   |
| 241199_x_at  | DPPA4           | 0,073 | 3,467  |
| 1569693_at   | BTBD8           | 0,072 | 3,804  |
| 203632_s_at  | GPRC5B          | 0,072 | 5,986  |
| 208483_x_at  | KRT33A          | 0,072 | 15,777 |
| 216485_s_at  | TPSAB1          | 0,072 | 2,759  |
| 228246_s_at  | SPTBN1          | 0,072 | 4,325  |
| 232437_at    | CPSF3L          | 0,072 | 6,697  |
| 232608_x_at  | CARD14          | 0,072 | 17,557 |
| 232719_at    | CELF4           | 0,072 | 2,429  |
| 232805_at    |                 | 0,072 | 2,256  |
| 237384_x_at  | KCTD16          | 0,072 | 8,706  |
| 1554612_at   | RUBCN           | 0,071 | 2,742  |
| 205112_at    | PLCE1           | 0,071 | 3,402  |
| 217057_s_at  | GNAS            | 0,071 | 2,904  |
| 237229_at    | KDM8            | 0,071 | 4,293  |
| 241449_at    |                 | 0,071 | 2,3    |
| 242757_at    | MDGA1           | 0,071 | 2,67   |
| 1568760_at   | MYH11           | 0,07  | 6,307  |
| 205638_at    | ADGRB3          | 0,07  | 11,75  |
| 209821_at    | IL33            | 0,07  | 33,619 |
| 217443_at    | LOC101927792    | 0,07  | 3,712  |

Tabelle1

|              |                    |       |        |
|--------------|--------------------|-------|--------|
| 220125_at    | DNAI1              | 0,07  | 2,547  |
| 237592_at    | ZC2HC1B            | 0,07  | 2,327  |
| 1555357_at   | DDX53              | 0,069 | 17,435 |
| 1562865_at   |                    | 0,069 | 3,687  |
| 1566229_a_at |                    | 0,069 | 2,822  |
| 214993_at    | ASPHD1             | 0,069 | 2,601  |
| 216978_x_at  |                    | 0,069 | 3,932  |
| 225511_at    | GPRC5B             | 0,069 | 2,65   |
| 231028_at    | LOC100506082       | 0,069 | 2,237  |
| 1553146_at   | C3orf30            | 0,068 | 4,54   |
| 211187_at    |                    | 0,068 | 6,687  |
| 216665_s_at  | LOC101929148       | 0,068 | 17,504 |
| 240179_at    |                    | 0,068 | 11,605 |
| 1561253_at   | LOC101927901       | 0,067 | 4,945  |
| 1564580_at   |                    | 0,067 | 2,183  |
| 1567167_at   |                    | 0,067 | 3,817  |
| 1568936_a_at |                    | 0,067 | 9,138  |
| 205422_s_at  | ITGBL1             | 0,067 | 10,523 |
| 205782_at    | FGF7               | 0,067 | 3,967  |
| 210126_at    | PSG9               | 0,067 | 10,06  |
| 239190_at    | VRK3               | 0,067 | 12,159 |
| 239822_at    | LINC01354          | 0,067 | 8,812  |
| 244253_at    |                    | 0,067 | 2,858  |
| 1560896_a_at |                    | 0,066 | 2,187  |
| 231626_at    | TPH1               | 0,066 | 2,635  |
| 1553275_s_at |                    | 0,065 | 2,5    |
| 1555719_a_at | MAATS1             | 0,065 | 3,161  |
| 228850_s_at  | SLIT2              | 0,065 | 2,726  |
| 231606_at    | CDX2               | 0,065 | 6,42   |
| 1559166_at   |                    | 0,064 | 3,573  |
| 1569716_at   |                    | 0,064 | 16,903 |
| 232881_at    | GNAS-AS1           | 0,064 | 17,45  |
| 234833_at    | LOC101927709       | 0,064 | 14,992 |
| 238705_at    |                    | 0,064 | 15,372 |
| 1554550_at   | CFAP97             | 0,063 | 16,424 |
| 1556757_a_at | ALS2CR11           | 0,063 | 13,431 |
| 1562860_at   | LOC101928271       | 0,063 | 12,639 |
| 207097_s_at  | SLC17A2            | 0,063 | 16,075 |
| 210086_at    | HR                 | 0,063 | 10,661 |
| 228887_x_at  | CCDC61             | 0,063 | 6,618  |
| 239153_at    | HOTAIR             | 0,063 | 10,515 |
| 1553036_at   | ADGRF2             | 0,062 | 17,419 |
| 1558354_s_at | PLCG1-AS1          | 0,062 | 2,214  |
| 1562628_at   | KRT40              | 0,062 | 3,302  |
| 206843_at    | CRYBA4             | 0,062 | 8,289  |
| 214660_at    | ITGA1              | 0,062 | 5,263  |
| 230272_at    | LINC00461///MIR9-2 | 0,062 | 3,314  |
| 237915_at    | CAND1.11           | 0,062 | 7,915  |
| 1561960_at   | CSPG4P5            | 0,061 | 4,645  |
| 1563496_at   | RNF217-AS1         | 0,061 | 14,994 |
| 207479_at    |                    | 0,061 | 4,805  |
| 233835_at    | LOC90246           | 0,061 | 17,385 |
| 238203_at    |                    | 0,061 | 5,877  |
| 1320_at      | PTPN21             | 0,06  | 17,373 |
| 1555018_at   | OR2C3              | 0,06  | 11,609 |
| 1557544_at   | CFAP58             | 0,06  | 4,555  |
| 1558119_at   | TSPAN17            | 0,06  | 8,156  |
| 1560523_at   |                    | 0,06  | 3,096  |
| 209074_s_at  | FAM107A            | 0,06  | 5,732  |
| 220484_at    | MCOLN3             | 0,06  | 8,148  |
| 1558806_at   |                    | 0,059 | 8,011  |
| 209672_s_at  | MIOS               | 0,059 | 2,602  |
| 210698_at    |                    | 0,059 | 4,957  |

Tabelle1

|              |                    |       |        |
|--------------|--------------------|-------|--------|
| 217532_x_at  |                    | 0,059 | 2,972  |
| 232339_at    | DCAF8              | 0,059 | 3,23   |
| 233492_s_at  | ARHGEF34P///OR2.   | 0,059 | 2,419  |
| 1560212_a_at | LOC101929248       | 0,058 | 2,181  |
| 1566462_at   |                    | 0,058 | 6,052  |
| 215355_at    | POU2F3             | 0,058 | 16,895 |
| 224198_at    | CELA1              | 0,058 | 2,427  |
| 228952_at    | ENPP1              | 0,058 | 5,148  |
| 234581_at    |                    | 0,058 | 8,906  |
| 230984_s_at  |                    | 0,057 | 2,699  |
| 239150_at    | SNTN               | 0,057 | 17,321 |
| 241726_at    |                    | 0,057 | 2,504  |
| 237841_at    |                    | 0,056 | 4,994  |
| 244211_at    |                    | 0,056 | 3,907  |
| 1557395_at   | IGFBP7-AS1         | 0,055 | 2,922  |
| 1560543_at   | GRK4               | 0,055 | 2,183  |
| 1566600_at   |                    | 0,055 | 2,372  |
| 1568603_at   | CADPS              | 0,055 | 2,904  |
| 220821_at    | GALR1              | 0,055 | 7,186  |
| 230246_at    | PLAC9              | 0,055 | 2,81   |
| 234472_at    | GALNT13            | 0,055 | 3,121  |
| 236325_at    | CEP126             | 0,055 | 2,891  |
| 243202_at    |                    | 0,055 | 2,694  |
| 1554828_at   | PDGFRA             | 0,054 | 4,216  |
| 204737_s_at  | MYH7///MYH6        | 0,054 | 17,227 |
| 220518_at    | ABI3BP             | 0,054 | 3,832  |
| 221936_x_at  | MRPL41             | 0,054 | 2,682  |
| 224499_s_at  | AICDA              | 0,054 | 3,259  |
| 231385_at    | LOC101060236///Df  | 0,054 | 7,972  |
| 241129_at    |                    | 0,054 | 4,585  |
| 1562845_at   | EP400NL            | 0,053 | 3,188  |
| 234732_s_at  | EFCAB6             | 0,053 | 4,748  |
| 234790_at    |                    | 0,053 | 17,035 |
| 241308_at    | LINC01255          | 0,053 | 2,748  |
| 1567359_at   | BDNF-AS            | 0,052 | 12,506 |
| 210814_at    | TRPC3              | 0,052 | 17,133 |
| 214796_at    | LOC101927137///KI. | 0,052 | 2,305  |
| 241153_at    |                    | 0,052 | 3,238  |
| 1563035_x_at | GPD1               | 0,05  | 2,688  |
| 221445_at    | OR1A2              | 0,05  | 3,15   |
| 232275_s_at  | HS6ST3             | 0,05  | 12,756 |
| 1558295_a_at | PPFIA2             | 0,049 | 8,147  |
| 1561540_at   | LINC00343          | 0,049 | 3,565  |
| 206356_s_at  | GNAL               | 0,049 | 2,29   |
| 216622_at    | LAMB4              | 0,049 | 2,639  |
| 226908_at    | LRIG3              | 0,049 | 4,579  |
| 241021_at    |                    | 0,049 | 3,944  |
| 1555151_s_at | TDH                | 0,048 | 16,566 |
| 1561185_at   | TTY7               | 0,048 | 15,523 |
| 1561891_at   | LOC101928668       | 0,048 | 3,545  |
| 215312_at    |                    | 0,048 | 8,858  |
| 222921_s_at  | HEY2               | 0,048 | 4,841  |
| 241530_at    |                    | 0,048 | 8,954  |
| 1568598_at   | KAZALD1            | 0,047 | 3,642  |
| 224894_at    | YAP1               | 0,047 | 5,534  |
| 229639_s_at  | SLC19A1            | 0,047 | 17,017 |
| 234386_s_at  |                    | 0,047 | 3,587  |
| 240132_at    |                    | 0,047 | 17,017 |
| 243726_at    |                    | 0,047 | 5,549  |
| 1569958_at   | DEPDC1-AS1         | 0,046 | 2,216  |
| 210880_s_at  | EFS                | 0,046 | 6,188  |
| 216097_at    |                    | 0,046 | 13,89  |
| 1561525_at   | LOC101927494       | 0,045 | 3,358  |

Tabelle1

|              |                   |       |        |
|--------------|-------------------|-------|--------|
| 235238_at    | SHC4              | 0,045 | 3,951  |
| 240285_at    | AQP2              | 0,045 | 5,135  |
| 240735_at    | CDC42BPA          | 0,045 | 9,686  |
| 37512_at     | HSD17B6           | 0,045 | 4,531  |
| 1561322_at   | LOC101927450      | 0,044 | 2,59   |
| 1562093_at   |                   | 0,044 | 5,478  |
| 1563559_at   | FMN1              | 0,044 | 2,725  |
| 244593_at    | HID1              | 0,044 | 16,875 |
| 1562656_at   |                   | 0,043 | 3,329  |
| 240591_at    | LOC102723645      | 0,043 | 3,287  |
| 231686_at    | GATM              | 0,042 | 6,118  |
| 1561114_a_at | DEPDC4            | 0,041 | 2,192  |
| 1561635_at   |                   | 0,041 | 2,879  |
| 1568633_a_at | LOC101927809      | 0,041 | 5,139  |
| 1568739_at   | LOC285692         | 0,041 | 4,63   |
| 233304_at    | NFIB              | 0,041 | 3,552  |
| 240844_at    |                   | 0,041 | 5,397  |
| 1569787_at   | RFTN1             | 0,04  | 12,764 |
| 206720_at    | MGAT5             | 0,04  | 4,126  |
| 1558868_a_at | DSE               | 0,039 | 6,888  |
| 221108_at    | DRICH1            | 0,039 | 2,418  |
| 238047_at    | ARHGAP36          | 0,039 | 3,653  |
| 1561855_x_at |                   | 0,038 | 4,912  |
| 211227_s_at  | PCDH11Y///PCDH1   | 0,038 | 2,64   |
| 229827_at    | BUB3              | 0,038 | 15,647 |
| 229868_s_at  | GDF15             | 0,038 | 16,522 |
| 232984_at    | LOC101930373///H\ | 0,038 | 16,57  |
| 238961_s_at  | FNDC3A            | 0,038 | 3,283  |
| 1561919_at   |                   | 0,036 | 8,173  |
| 207934_at    | RFPL1             | 0,036 | 3,728  |
| 215703_at    | CFTR              | 0,036 | 16,42  |
| 220445_s_at  | CSAG2///CSAG3     | 0,036 | 4,372  |
| 221369_at    | MTNR1A            | 0,036 | 2,882  |
| 206664_at    | SI                | 0,035 | 2,553  |
| 211522_s_at  | GNRHR             | 0,035 | 12,565 |
| 235018_at    | CSRNP3            | 0,035 | 2,656  |
| 237294_at    | RASSF4            | 0,035 | 3,228  |
| 237929_at    | C17orf50          | 0,035 | 16,067 |
| 240253_at    |                   | 0,035 | 3,642  |
| 1558337_at   |                   | 0,034 | 2,602  |
| 1559839_at   | TBX18             | 0,034 | 3,158  |
| 1566767_at   |                   | 0,034 | 12,369 |
| 1570101_at   |                   | 0,034 | 12,197 |
| 233821_at    |                   | 0,034 | 16,18  |
| 1555558_at   | USP25             | 0,033 | 2,605  |
| 1569561_at   |                   | 0,033 | 30,355 |
| 221330_at    | CHRM2             | 0,032 | 3,886  |
| 229680_at    | TACO1             | 0,032 | 7,076  |
| 1554526_at   | OLFM3             | 0,031 | 11,881 |
| 1555572_at   | CA6               | 0,031 | 5,216  |
| 1561625_at   | LOC101928565      | 0,03  | 15,791 |
| 201452_at    | RHEB              | 0,03  | 8,121  |
| 222926_at    | DCDC2             | 0,03  | 2,477  |
| 240570_at    | PATJ              | 0,03  | 2,702  |
| 1555246_a_at | SCN1A             | 0,029 | 3,944  |
| 216990_at    | GART              | 0,029 | 2,28   |
| 220818_s_at  | TRPC4             | 0,029 | 3,462  |
| 228511_s_at  |                   | 0,029 | 15,6   |
| 238314_x_at  |                   | 0,029 | 15,574 |
| 235869_at    | SCOC-AS1          | 0,028 | 2,743  |
| 240500_at    |                   | 0,028 | 15,495 |
| 241139_at    |                   | 0,028 | 3,572  |
| 1561261_at   |                   | 0,027 | 15,382 |



Tabelle1

|              |              |        |        |
|--------------|--------------|--------|--------|
| 1561678_at   | LOC101929486 | 0,027  | 7,837  |
| 219948_x_at  | UGT2A3       | 0,027  | 15,382 |
| 220738_s_at  | RPS6KA6      | 0,027  | 4,02   |
| 243060_at    | LINC01532    | 0,027  | 4,573  |
| 1560642_at   |              | 0,026  | 15,134 |
| 1570268_at   | LOC101929210 | 0,025  | 7,619  |
| 217163_at    | ESR1         | 0,025  | 14,997 |
| 219772_s_at  | SMPX         | 0,025  | 14,997 |
| 243027_at    | IGSF5        | 0,025  | 5,377  |
| 1563608_a_at | KCNT1        | 0,024  | 2,251  |
| 208283_at    | GAGE1        | 0,024  | 14,85  |
| 1556653_at   | ANKAR        | 0,023  | 12,324 |
| 1563319_at   |              | 0,023  | 12,324 |
| 236021_at    |              | 0,023  | 2,316  |
| 1560877_a_at |              | 0,022  | 2,558  |
| 1557606_at   | LOC101928002 | 0,021  | 14,143 |
| 1570561_at   |              | 0,021  | 13,931 |
| 207235_s_at  | GRM5         | 0,021  | 9,277  |
| 224260_at    |              | 0,021  | 14,143 |
| 231265_at    | COX7B2       | 0,021  | 10,698 |
| 236824_at    | TMEM132B     | 0,021  | 5,952  |
| 1554751_at   |              | 0,02   | 9,092  |
| 1562613_at   |              | 0,02   | 9,885  |
| 1569023_a_at | LINC00458    | 0,02   | 6,962  |
| 219005_at    | TMEM59L      | 0,02   | 2,263  |
| 230962_at    | DCLK1        | 0,02   | 13,702 |
| 231439_at    | FAM84A       | 0,02   | 4,119  |
| 204667_at    | FOXA1        | 0,019  | 4,479  |
| 224354_at    |              | 0,019  | 13,188 |
| 206029_at    | ANKRD1       | 0,018  | 10,289 |
| 211981_at    | COL4A1       | 0,018  | 12,899 |
| 222836_at    | NAA15        | 0,018  | 12,899 |
| 1552870_s_at | AXDND1       | 0,017  | 12,586 |
| 1564299_at   | LOC100127940 | 0,017  | 3,531  |
| 238241_at    | EPHA5-AS1    | 0,017  | 2,384  |
| 1566042_at   |              | 0,016  | 11,88  |
| 1566323_at   | MAF          | 0,016  | 12,247 |
| 237888_at    | LOC100422737 | 0,016  | 2,852  |
| 243929_at    |              | 0,016  | 12,247 |
| 1568826_at   | LINC01012    | 0,015  | 9,735  |
| 239230_at    | HES5         | 0,014  | 2,226  |
| 1560673_at   | KIZ-AS1      | 0,013  | 10,584 |
| 208207_at    |              | 0,013  | 10,584 |
| 213663_s_at  | FAM134B      | 0,013  | 2,819  |
| 231506_at    |              | 0,012  | 11,93  |
| 1562693_at   | LOC105372520 | 0,011  | 4,367  |
| 202989_at    | RGS1         | 0,009  | 7,662  |
| 224168_at    | TXNDC2       | 0,009  | 6,959  |
| 234436_x_at  | OBP2A        | 0,009  | 5,272  |
| 240714_at    |              | 0,009  | 6,959  |
| 1563160_at   | F11          | 0,008  | 6,222  |
| 235453_at    | TOR1AIP2     | 0,008  | 6,222  |
| 1566892_at   |              | 0,007  | 5,459  |
| 227070_at    | GLT8D2       | 0,006  | 4,681  |
| 240893_at    |              | 0,006  | 3,9    |
| 204796_at    | EML1         | 0,005  | 3,135  |
| 214389_at    | SLC5A12      | 0,005  | 3,135  |
| 224951_at    | CERS5        | -0,309 | 3,187  |
| 226049_at    | ERC1         | -0,319 | 2,38   |
| 212059_s_at  | TRPC4AP      | -0,325 | 2,311  |
| 220127_s_at  | FBXL12       | -0,343 | 3,175  |
| 208979_at    | NCOA6        | -0,348 | 2,269  |
| 1554428_s_at | NLGN2        | -0,35  | 2,252  |

Tabelle1

|              |                  |        |       |
|--------------|------------------|--------|-------|
| 218165_at    | MEAF6            | -0,351 | 2,371 |
| 211503_s_at  | RAB14            | -0,353 | 2,197 |
| 221495_s_at  | TCF25            | -0,357 | 2,193 |
| 211509_s_at  | RTN4             | -0,364 | 2,191 |
| 227507_at    | ZNF592           | -0,366 | 2,391 |
| 219613_s_at  | SIRT6            | -0,368 | 2,417 |
| 38447_at     | GRK2             | -0,372 | 2,4   |
| 226917_s_at  | ANAPC4           | -0,376 | 2,534 |
| 217877_s_at  | GPBP1L1          | -0,378 | 2,512 |
| 213509_x_at  | CES2             | -0,385 | 2,544 |
| 200714_x_at  | OS9              | -0,386 | 2,469 |
| 225964_at    | ZXDC             | -0,386 | 2,297 |
| 224842_at    | LOC101060386//BC | -0,389 | 2,416 |
| 215994_x_at  | TBC1D9B          | -0,393 | 2,936 |
| 200867_at    | RNF114           | -0,396 | 2,475 |
| 229231_at    | LRRC37B          | -0,401 | 2,471 |
| 221752_at    | SSH1             | -0,406 | 2,335 |
| 228385_at    | DDX59            | -0,406 | 2,218 |
| 201673_s_at  | GYS1             | -0,407 | 2,209 |
| 231907_at    | ABL2             | -0,408 | 2,186 |
| 200044_at    | GATC//SRSF9      | -0,41  | 2,556 |
| 207181_s_at  | CASP7            | -0,411 | 2,583 |
| 227305_s_at  | SMCR8            | -0,411 | 2,576 |
| 228638_at    | FAM76A           | -0,414 | 2,538 |
| 238679_at    | MESDC2           | -0,414 | 2,235 |
| 212757_s_at  | CAMK2G           | -0,415 | 2,459 |
| 203142_s_at  | AP3B1            | -0,416 | 2,933 |
| 215541_s_at  | DIAPH1           | -0,422 | 2,307 |
| 226954_at    | UBE2R2           | -0,422 | 2,784 |
| 233093_s_at  | BIRC6            | -0,422 | 2,312 |
| 200738_s_at  | PGK1             | -0,425 | 2,214 |
| 213044_at    | ROCK1            | -0,425 | 4,311 |
| 224981_at    | TMEM219          | -0,425 | 2,401 |
| 201864_at    | GDI1             | -0,427 | 2,334 |
| 52169_at     | STRADA           | -0,427 | 3,302 |
| 60528_at     | PLA2G4B//JMJD7-I | -0,43  | 2,339 |
| 201032_at    | BLCAP            | -0,432 | 2,516 |
| 230618_s_at  |                  | -0,432 | 2,197 |
| 226894_at    | SLC35A3          | -0,433 | 2,375 |
| 1554678_s_at | HNRNPDL          | -0,435 | 2,336 |
| 211139_s_at  | NAB1             | -0,436 | 2,213 |
| 212054_x_at  | TBC1D9B          | -0,436 | 2,992 |
| 218143_s_at  | SCAMP2           | -0,438 | 2,479 |
| 1554691_a_at | PACSIN2          | -0,439 | 2,288 |
| 201561_s_at  | CLSTN1           | -0,442 | 2,357 |
| 212375_at    | EP400            | -0,443 | 2,186 |
| 201133_s_at  | PJA2             | -0,445 | 2,621 |
| 218171_at    | VPS4B            | -0,445 | 2,791 |
| 220980_s_at  | ADPGK            | -0,445 | 3,587 |
| 226013_at    | TRAK1            | -0,445 | 2,428 |
| 208453_s_at  | XPNPEP1          | -0,447 | 2,917 |
| 208174_x_at  | ZRSR2            | -0,448 | 2,374 |
| 212571_at    | CHD8             | -0,449 | 4,134 |
| 37652_at     | CABIN1           | -0,449 | 2,674 |
| 201296_s_at  | WSB1             | -0,453 | 2,386 |
| 202716_at    | PTPN1            | -0,456 | 2,723 |
| 229325_at    | ZZZ3             | -0,456 | 2,691 |
| 203442_x_at  | EML3             | -0,458 | 2,573 |
| 212751_at    | UBE2N            | -0,458 | 3,494 |
| 218530_at    | FHOD1            | -0,458 | 2,238 |
| 200745_s_at  | GNB1             | -0,463 | 3,249 |
| 200847_s_at  | SARAF            | -0,464 | 2,413 |
| 211946_s_at  | PRRC2C           | -0,464 | 4,026 |

Tabelle1

|             |                   |        |       |
|-------------|-------------------|--------|-------|
| 203944_x_at | BTN2A1            | -0,465 | 2,252 |
| 223445_at   | DTNBP1            | -0,466 | 3,395 |
| 230306_at   | VPS26B            | -0,466 | 2,259 |
| 214812_s_at | MOB1A             | -0,47  | 3,332 |
| 224993_at   | MLLT1             | -0,471 | 2,628 |
| 200650_s_at | LDHA              | -0,472 | 2,641 |
| 213145_at   | FBXL14            | -0,472 | 3,673 |
| 224810_s_at | ANKRD13A          | -0,472 | 2,805 |
| 212601_at   | ZZEF1             | -0,476 | 2,411 |
| 203286_at   | RNF44             | -0,478 | 2,305 |
| 218740_s_at | CDK5RAP3          | -0,478 | 2,322 |
| 235162_at   | MDM4              | -0,478 | 2,59  |
| 221819_at   | RAB35             | -0,481 | 2,773 |
| 38398_at    | MADD              | -0,481 | 3,615 |
| 222147_s_at | ACTR5             | -0,482 | 2,345 |
| 218636_s_at | MAN1B1            | -0,484 | 2,351 |
| 225216_at   | FAM199X           | -0,484 | 3,311 |
| 200600_at   | MSN               | -0,485 | 4,096 |
| 225364_at   | STK4              | -0,485 | 2,704 |
| 211665_s_at | SOS2              | -0,486 | 2,283 |
| 200640_at   | YWHAZ             | -0,487 | 2,721 |
| 202215_s_at | NFYC              | -0,487 | 2,702 |
| 230435_at   | FAM228B           | -0,487 | 3,198 |
| 206431_x_at | TBC1D9B           | -0,489 | 3,925 |
| 216835_s_at | DOK1              | -0,489 | 2,375 |
| 209027_s_at | ABI1              | -0,49  | 2,962 |
| 209668_x_at | CES2              | -0,491 | 3,089 |
| 214924_s_at | TRAK1             | -0,491 | 3,522 |
| 64438_at    | OGFOD3            | -0,491 | 2,403 |
| 202425_x_at | PPP3CA            | -0,492 | 2,866 |
| 209028_s_at | ABI1              | -0,492 | 3,58  |
| 1560136_at  | ARL5C             | -0,493 | 2,32  |
| 218518_at   | FAM13B            | -0,493 | 2,286 |
| 213136_at   | PTPN2             | -0,494 | 3,523 |
| 1569105_at  | SETD5             | -0,496 | 2,255 |
| 212198_s_at | TM9SF4            | -0,498 | 2,767 |
| 230667_at   | FAM204A           | -0,498 | 2,513 |
| 209741_x_at | SCAPER            | -0,5   | 2,577 |
| 217759_at   | TRIM44            | -0,5   | 2,237 |
| 202360_at   | MAML1             | -0,502 | 3,872 |
| 232683_s_at | PARP6             | -0,503 | 3,639 |
| 1554105_at  | TMEM185A          | -0,504 | 3,226 |
| 225764_at   | ETV6              | -0,504 | 2,211 |
| 215366_at   | SNX13             | -0,505 | 3,037 |
| 214780_s_at | MYO9B             | -0,506 | 5,127 |
| 222017_x_at | LRCH4             | -0,506 | 2,267 |
| 212786_at   | CLEC16A           | -0,507 | 2,711 |
| 215549_x_at | CTAGE8///CTAGE4,  | -0,507 | 2,602 |
| 218389_s_at | APH1A             | -0,508 | 3,821 |
| 224303_x_at | NIN               | -0,508 | 2,623 |
| 225724_at   | PSMA3-AS1         | -0,508 | 2,491 |
| 243690_at   | TRIOBP            | -0,508 | 2,325 |
| 200746_s_at | GNB1              | -0,512 | 5,878 |
| 208734_x_at | RAB2A             | -0,513 | 2,224 |
| 219387_at   | CCDC88A           | -0,514 | 2,379 |
| 219767_s_at | CRYZL1            | -0,514 | 2,694 |
| 225893_at   | RC3H1             | -0,514 | 3,379 |
| 238768_at   | C2orf68           | -0,514 | 3,022 |
| 201103_x_at | NBPF20///NBPF10// | -0,516 | 3     |
| 210443_x_at | OGFR              | -0,516 | 2,251 |
| 1561915_at  |                   | -0,517 | 2,281 |
| 221073_s_at | NOD1              | -0,519 | 2,666 |
| 224689_at   | MANBAL            | -0,519 | 2,472 |

Tabelle1

|              |                   |        |       |
|--------------|-------------------|--------|-------|
| 224939_at    | NUFIP2            | -0,52  | 2,494 |
| 225363_at    | PTEN              | -0,52  | 2,61  |
| 202163_s_at  | CNOT8             | -0,521 | 2,402 |
| 202274_at    | ACTG2             | -0,521 | 2,3   |
| 226740_x_at  | NBPF26///NBPF10// | -0,521 | 2,953 |
| 239314_at    | NHLRC3            | -0,521 | 2,511 |
| 202394_s_at  | ABCF3             | -0,522 | 2,468 |
| 213612_x_at  | NBPF20///NBPF10// | -0,523 | 3,331 |
| 225277_at    | SLC39A13          | -0,523 | 2,484 |
| 220753_s_at  | CRYL1             | -0,524 | 2,445 |
| 226347_at    |                   | -0,524 | 2,33  |
| 230452_at    | LOC101930279///FL | -0,524 | 2,788 |
| 1568618_a_at | GALNT1            | -0,525 | 2,23  |
| 221082_s_at  | NDRG3             | -0,525 | 3,855 |
| 52940_at     | SIGIRR            | -0,525 | 3,131 |
| 207081_s_at  | PI4KA             | -0,527 | 2,516 |
| 212669_at    | CAMK2G            | -0,527 | 3,542 |
| 208988_at    | KDM2A             | -0,53  | 2,298 |
| 218189_s_at  | NANS              | -0,53  | 2,378 |
| 209090_s_at  | SH3GLB1           | -0,531 | 3,536 |
| 242608_x_at  | FAM161B           | -0,531 | 2,475 |
| 221499_s_at  | STX16             | -0,532 | 2,589 |
| 244687_at    | DBT               | -0,532 | 2,668 |
| 238518_x_at  | GLYCTK            | -0,533 | 2,286 |
| 201299_s_at  | MOB1A             | -0,534 | 2,314 |
| 208737_at    | ATP6V1G1          | -0,534 | 3,034 |
| 212579_at    | SMCHD1            | -0,534 | 2,26  |
| 226711_at    | FOXN2             | -0,534 | 2,335 |
| 224597_at    | NORAD             | -0,535 | 3,874 |
| 204060_s_at  | PRKY///PRKX       | -0,537 | 2,645 |
| 213980_s_at  | CTBP1             | -0,537 | 3,004 |
| 222850_s_at  | DNAJB14           | -0,537 | 3,332 |
| 209073_s_at  | LOC101930388///LC | -0,538 | 2,323 |
| 212854_x_at  | NBPF1             | -0,539 | 3,953 |
| 222414_at    | KMT2C             | -0,539 | 2,294 |
| 212043_at    | TGOLN2            | -0,54  | 3,979 |
| 219151_s_at  | RABL2A///RABL2B   | -0,54  | 2,421 |
| 1555913_at   | GON4L             | -0,541 | 2,719 |
| 1568894_at   | LOC101929007      | -0,541 | 2,357 |
| 203269_at    | NSMAF             | -0,541 | 3,451 |
| 223770_x_at  | MRI1              | -0,541 | 3,641 |
| 204837_at    | MTMR9             | -0,542 | 2,416 |
| 213788_s_at  |                   | -0,543 | 2,378 |
| 228512_at    | PTCD3             | -0,543 | 2,464 |
| 242978_x_at  |                   | -0,543 | 2,195 |
| 1569594_a_at | NEMF              | -0,545 | 3,265 |
| 209786_at    | HMGNA4            | -0,545 | 2,559 |
| 234937_x_at  | ZFP28             | -0,546 | 2,216 |
| 220305_at    | MAVS              | -0,548 | 2,23  |
| 225710_at    | GNB4              | -0,548 | 2,558 |
| 212357_at    | FAM168A           | -0,549 | 3,275 |
| 1564373_a_at | LOC283887         | -0,551 | 2,419 |
| 205025_at    | ZBTB48            | -0,551 | 2,903 |
| 229664_at    | MAPK8             | -0,551 | 2,357 |
| 207629_s_at  | ARHGEF2           | -0,553 | 2,253 |
| 204549_at    | IKBKE             | -0,555 | 3,138 |
| 218120_s_at  | HMOX2             | -0,555 | 2,937 |
| 219040_at    | CORO7             | -0,555 | 2,639 |
| 224368_s_at  | NDRG3             | -0,555 | 3,687 |
| 202098_s_at  | PRMT2             | -0,557 | 2,493 |
| 216600_x_at  | ALDOB             | -0,557 | 2,935 |
| 241945_at    | LOC101929681      | -0,557 | 2,714 |
| 212870_at    | SOS2              | -0,559 | 2,888 |

Tabelle1

|              |                    |        |       |
|--------------|--------------------|--------|-------|
| 235012_at    | LRCH1              | -0,559 | 2,577 |
| 1566472_s_at | LOC100996506///Rf  | -0,56  | 2,358 |
| 230500_at    | PDE7A              | -0,56  | 3,078 |
| 229447_x_at  | NBPF10///NBPF8///N | -0,561 | 3,013 |
| 242214_at    | RPS27A             | -0,563 | 2,405 |
| 211121_s_at  | DOK1               | -0,564 | 2,343 |
| 209467_s_at  | MKNK1              | -0,565 | 2,324 |
| 208957_at    | ERP44              | -0,566 | 4,661 |
| 225213_at    | PPTC7              | -0,566 | 3,052 |
| 214281_s_at  | RCHY1              | -0,567 | 2,514 |
| 223024_at    | AP1M1              | -0,567 | 3,105 |
| 203332_s_at  | INPP5D             | -0,568 | 3,958 |
| 208738_x_at  | LOC101929087///Sl  | -0,568 | 2,362 |
| 55065_at     | MARK4              | -0,568 | 2,685 |
| 229460_at    | FAM126B            | -0,569 | 3,505 |
| 201959_s_at  | MYCBP2             | -0,57  | 3,214 |
| 211678_s_at  | RNF114             | -0,57  | 4,45  |
| 237438_at    |                    | -0,57  | 2,56  |
| 238792_at    | PCNX1              | -0,57  | 2,234 |
| 225889_at    | AEBP2              | -0,571 | 2,59  |
| 226798_at    | BCL2L13            | -0,571 | 2,565 |
| 201080_at    | PIP4K2B            | -0,572 | 2,671 |
| 202117_at    | ARHGAP1            | -0,572 | 2,875 |
| 222657_s_at  | UBE2W              | -0,574 | 2,206 |
| 201461_s_at  | MAPKAPK2           | -0,576 | 2,393 |
| 206708_at    | FOXN2              | -0,577 | 2,656 |
| 218387_s_at  | PGLS               | -0,578 | 2,716 |
| 40225_at     | GAK                | -0,578 | 4,292 |
| 202788_at    | MAPKAPK3           | -0,579 | 3,289 |
| 211256_x_at  | BTN2A1             | -0,579 | 2,244 |
| 232983_s_at  | SERGEF             | -0,581 | 2,204 |
| 229089_at    | ZBTB49             | -0,582 | 2,317 |
| 230532_at    | CXorf38            | -0,582 | 2,754 |
| 204587_at    | SLC25A14           | -0,583 | 2,79  |
| 207791_s_at  | RAB1A              | -0,584 | 2,572 |
| 221528_s_at  | ELMO2              | -0,584 | 3,412 |
| 213615_at    | LPCAT3             | -0,585 | 2,716 |
| 216526_x_at  | HLA-C              | -0,585 | 2,46  |
| 223871_x_at  | ING5               | -0,585 | 2,356 |
| 228869_at    | SNX20              | -0,585 | 2,259 |
| 201231_s_at  | ENO1               | -0,586 | 2,77  |
| 214931_s_at  | SRPK2              | -0,586 | 2,842 |
| 223187_s_at  | ORMDL1             | -0,586 | 4,03  |
| 202822_at    | LPP                | -0,587 | 3,343 |
| 218684_at    | LRRC8D             | -0,587 | 3,742 |
| 36030_at     | IFFO1              | -0,587 | 2,854 |
| 37796_at     | SAP25///LRCH4      | -0,587 | 2,434 |
| 201380_at    | CRTAP              | -0,588 | 3,166 |
| 228089_x_at  | MIR6748///TMEM17   | -0,588 | 2,547 |
| 200652_at    | SSR2               | -0,589 | 2,92  |
| 202304_at    | FNDC3A             | -0,589 | 2,283 |
| 208674_x_at  | DDOST              | -0,589 | 2,965 |
| 211976_at    | NUDT3              | -0,589 | 4,729 |
| 229250_at    | TPCN2              | -0,589 | 2,876 |
| 59375_at     | MYO15B             | -0,589 | 2,643 |
| 202603_at    | ADAM10             | -0,59  | 3,09  |
| 212252_at    | CAMKK2             | -0,59  | 2,598 |
| 227073_at    | MAP3K2             | -0,59  | 2,64  |
| 203778_at    | MANBA              | -0,593 | 2,73  |
| 65630_at     | TMEM80             | -0,593 | 2,303 |
| 225037_at    | SLC35C2            | -0,594 | 2,51  |
| 207760_s_at  | NCOR2              | -0,595 | 3,031 |
| 222208_s_at  | POLR2J4            | -0,595 | 2,82  |

Tabelle1

|              |                    |        |       |
|--------------|--------------------|--------|-------|
| 225931_s_at  | RNF213             | -0,595 | 2,195 |
| 221893_s_at  | ADCK2              | -0,596 | 2,463 |
| 226652_at    | USP3               | -0,596 | 2,19  |
| 201104_x_at  | NBPF25P///NBPF26   | -0,597 | 3,313 |
| 212476_at    | ACAP2              | -0,598 | 3,084 |
| 214291_at    | RPL17-C18orf32///S | -0,599 | 2,226 |
| 222709_at    | ATG7               | -0,599 | 2,74  |
| 224991_at    | CMIP               | -0,599 | 2,587 |
| 204613_at    | PLCG2              | -0,6   | 2,337 |
| 218753_at    | XKR8               | -0,601 | 3,712 |
| 200946_x_at  | GLUD1              | -0,602 | 3,085 |
| 201900_s_at  | AKR1A1             | -0,602 | 2,785 |
| 213656_s_at  | KLC1               | -0,602 | 4,243 |
| 229587_at    | UBA2               | -0,602 | 2,65  |
| 225437_s_at  | BRAT1              | -0,603 | 2,498 |
| 214718_at    | GATAD1             | -0,606 | 2,535 |
| 214783_s_at  | ANXA11             | -0,606 | 3,158 |
| 224807_at    | GRAMD1A            | -0,606 | 2,951 |
| 219206_x_at  | TMBIM4             | -0,607 | 2,528 |
| 223049_at    | GRB2               | -0,607 | 3,664 |
| 229571_at    |                    | -0,607 | 2,654 |
| 217717_s_at  | YWHAB              | -0,608 | 3,283 |
| 219237_s_at  | DNAJB14            | -0,608 | 3,221 |
| 228830_s_at  | ATF7               | -0,608 | 3,605 |
| 208878_s_at  | PAK2               | -0,609 | 3,933 |
| 228483_s_at  | TAF9B              | -0,609 | 2,312 |
| 232149_s_at  | NSMAF              | -0,609 | 3,031 |
| 1569640_s_at | EEPD1              | -0,61  | 2,213 |
| 202122_s_at  | PLIN3              | -0,61  | 3,202 |
| 235772_at    | PPP3CB-AS1         | -0,61  | 2,731 |
| 229803_s_at  | RPS10-NUDT3///NU   | -0,611 | 3,961 |
| 209239_at    | NFKB1              | -0,612 | 2,333 |
| 213876_x_at  | ZRSR2              | -0,612 | 3,67  |
| 228829_at    | ATF7               | -0,614 | 2,49  |
| 209481_at    | SNRK               | -0,615 | 3,52  |
| 209593_s_at  | TOR1B              | -0,615 | 3,635 |
| 226994_at    | DNAJA2             | -0,615 | 3,648 |
| 1559822_s_at | MTDH               | -0,616 | 3,506 |
| 202442_at    | AP3S1              | -0,616 | 3,468 |
| 212605_s_at  | NUDT3              | -0,616 | 3,183 |
| 213078_x_at  | LPCAT4             | -0,616 | 2,869 |
| 221695_s_at  | MAP3K2             | -0,616 | 3,021 |
| 240205_x_at  |                    | -0,616 | 2,433 |
| 1294_at      | MIR5193///UBA7     | -0,617 | 2,247 |
| 65521_at     | UBE2D4             | -0,617 | 2,511 |
| 1554767_s_at | CRYZL1             | -0,618 | 2,223 |
| 209308_s_at  | BNIP2              | -0,618 | 2,877 |
| 225573_at    | NPHP3-ACAD11///A   | -0,618 | 2,275 |
| 238207_at    | SMIM4              | -0,618 | 2,47  |
| 204034_at    | ETHE1              | -0,619 | 2,762 |
| 207988_s_at  | ARPC2              | -0,619 | 3,635 |
| 218132_s_at  | TSEN34             | -0,62  | 3,981 |
| 226337_at    | GORAB              | -0,62  | 2,249 |
| 202787_s_at  | MAPKAPK3           | -0,621 | 2,793 |
| 205976_at    | FASTKD2            | -0,621 | 2,311 |
| 218968_s_at  | ZFP64              | -0,621 | 2,594 |
| 225043_at    | SLC15A4            | -0,621 | 2,353 |
| 227864_s_at  | MVB12A             | -0,621 | 2,442 |
| 202331_at    | BCKDHA             | -0,622 | 2,788 |
| 210720_s_at  | NECAB3             | -0,622 | 3,033 |
| 211967_at    | TMEM123            | -0,622 | 3,442 |
| 214459_x_at  | HLA-C              | -0,622 | 2,472 |
| 226215_s_at  | KDM2B              | -0,622 | 4,651 |

Tabelle1

|              |                   |        |       |
|--------------|-------------------|--------|-------|
| 1559582_at   | RHOQ              | -0,623 | 2,2   |
| 211230_s_at  | PIK3CD            | -0,623 | 3,619 |
| 211973_at    | NUDT3             | -0,624 | 3,33  |
| 210093_s_at  | MAGOHB///MAGOH    | -0,625 | 3,124 |
| 212005_at    | SZRD1             | -0,625 | 2,236 |
| 224912_at    | TTC7A             | -0,625 | 2,554 |
| 243_g_at     | MAP4              | -0,625 | 2,778 |
| 37831_at     | SIPA1L3           | -0,625 | 3,123 |
| 201765_s_at  | HEXA              | -0,626 | 3,188 |
| 215127_s_at  | RBMS1             | -0,626 | 2,632 |
| 215493_x_at  | BTN2A1            | -0,627 | 3,071 |
| 217916_s_at  | FAM49B            | -0,627 | 2,489 |
| 229588_at    | DNAJC10           | -0,627 | 2,278 |
| 209534_x_at  | AKAP13            | -0,628 | 3,579 |
| 212052_s_at  | TBC1D9B           | -0,629 | 3,75  |
| 229297_at    | GPATCH2L          | -0,629 | 2,863 |
| 202158_s_at  | CELF2             | -0,63  | 5,938 |
| 202860_at    | DENND4B           | -0,63  | 3,181 |
| 212572_at    | STK38L            | -0,631 | 3,761 |
| 235194_at    | TPCN2             | -0,631 | 2,672 |
| 1555461_at   | TXNL4A            | -0,633 | 2,394 |
| 1555702_a_at | ST3GAL3           | -0,633 | 2,279 |
| 218335_x_at  | TNIP2             | -0,633 | 3,58  |
| 215553_x_at  |                   | -0,634 | 2,227 |
| 217554_at    |                   | -0,634 | 3,039 |
| 200864_s_at  | RAB11A            | -0,635 | 3,176 |
| 201724_s_at  | GALNT1            | -0,635 | 2,711 |
| 222533_at    | CRBN              | -0,635 | 3,361 |
| 222582_at    | PRKAG2            | -0,635 | 3,28  |
| 201651_s_at  | PACSIN2           | -0,636 | 3,132 |
| 203201_at    | PMM2              | -0,636 | 2,25  |
| 219861_at    | DNAJC17           | -0,636 | 2,891 |
| 229923_at    | ZDHHC21           | -0,636 | 2,311 |
| 44040_at     | LOC101927826///FE | -0,636 | 2,74  |
| 202079_s_at  | TRAK1             | -0,638 | 5,592 |
| 204436_at    | PLEKHO2           | -0,638 | 2,383 |
| 206770_s_at  | SLC35A3           | -0,638 | 3,538 |
| 211205_x_at  | PIP5K1A           | -0,638 | 2,699 |
| 218273_s_at  | PDP1              | -0,638 | 2,294 |
| 209424_s_at  | C1QTNF3-AMACR//   | -0,639 | 2,365 |
| 210978_s_at  | TAGLN2            | -0,639 | 2,179 |
| 217356_s_at  | PGK1              | -0,639 | 2,234 |
| 225234_at    | CBL               | -0,639 | 3,967 |
| 208757_at    | TMED9             | -0,64  | 2,656 |
| 209110_s_at  | RGL2              | -0,64  | 2,965 |
| 225339_at    | SPAG9             | -0,641 | 3,373 |
| 235427_at    | CFLAR             | -0,641 | 2,618 |
| 202101_s_at  | RALB              | -0,642 | 2,443 |
| 213154_s_at  | BICD2             | -0,642 | 3,966 |
| 231369_at    | ZNF333            | -0,642 | 2,623 |
| 224647_at    | CCNY              | -0,643 | 2,888 |
| 212150_at    | EFR3A             | -0,644 | 2,189 |
| 1553272_at   | SLC36A1           | -0,645 | 2,195 |
| 202457_s_at  | PPP3CA            | -0,645 | 2,26  |
| 209868_s_at  | RBMS1             | -0,646 | 2,313 |
| 224852_at    | TTC17             | -0,646 | 2,757 |
| 212856_at    | GRAMD4            | -0,647 | 2,213 |
| 225499_at    | RALGAPA2          | -0,647 | 3,295 |
| 200653_s_at  | CALM3///CALM2///C | -0,648 | 2,668 |
| 215930_s_at  | CTAGE5            | -0,648 | 2,873 |
| 203568_s_at  | TRIM38            | -0,649 | 3,261 |
| 209721_s_at  | IFFO1             | -0,649 | 2,668 |
| 222647_at    | SLC35C1           | -0,649 | 2,444 |

Tabelle1

|              |                   |        |       |
|--------------|-------------------|--------|-------|
| 227352_at    | SWSAP1            | -0,649 | 3,304 |
| 202794_at    | INPP1             | -0,65  | 2,413 |
| 212361_s_at  | ATP2A2            | -0,65  | 3,445 |
| 213940_s_at  | FNBP1             | -0,65  | 3,387 |
| 200727_s_at  | ACTR2             | -0,651 | 2,547 |
| 202429_s_at  | PPP3CA            | -0,651 | 2,322 |
| 205745_x_at  | ADAM17            | -0,651 | 2,29  |
| 223647_x_at  | HSCB              | -0,651 | 2,608 |
| 64486_at     | CORO1B            | -0,651 | 2,658 |
| 224304_x_at  | NIN               | -0,652 | 2,997 |
| 212350_at    | TBC1D1            | -0,654 | 2,379 |
| 209898_x_at  | ITSN2             | -0,656 | 4,248 |
| 212360_at    | AMPD2             | -0,656 | 3,174 |
| 226659_at    | DEF6              | -0,656 | 3,664 |
| 208736_at    | ARPC3             | -0,657 | 2,431 |
| 235248_at    | BTBD9             | -0,657 | 2,284 |
| 244458_at    |                   | -0,657 | 2,417 |
| 214707_x_at  | ALMS1             | -0,658 | 2,391 |
| 221542_s_at  | ERLIN2            | -0,659 | 2,237 |
| 239100_x_at  | PCNX1             | -0,659 | 2,439 |
| 219504_s_at  | RPAP2             | -0,661 | 2,459 |
| 227065_at    | RNF216            | -0,661 | 5,24  |
| 227685_at    | TMF1              | -0,661 | 4,314 |
| 227824_at    | PRKCB             | -0,661 | 2,501 |
| 215009_s_at  | THAP9-AS1         | -0,662 | 2,962 |
| 218031_s_at  | FOXN3             | -0,662 | 2,939 |
| 1562416_at   |                   | -0,663 | 2,198 |
| 212566_at    | MAP4              | -0,663 | 3,647 |
| 224288_x_at  | FKSG49            | -0,663 | 2,757 |
| 200670_at    | XBP1              | -0,664 | 2,193 |
| 1557370_s_at | MYCBP2            | -0,666 | 4,297 |
| 51200_at     | C19orf60          | -0,666 | 4,868 |
| 208310_s_at  | CCZ1B///CCZ1      | -0,667 | 2,776 |
| 236692_at    |                   | -0,667 | 2,321 |
| 224651_at    | CCNY              | -0,668 | 3,779 |
| 243720_at    |                   | -0,668 | 2,334 |
| 217743_s_at  | TMEM30A           | -0,669 | 2,787 |
| 225658_at    | SPOPL             | -0,669 | 2,733 |
| 212635_at    | TNPO1             | -0,67  | 2,945 |
| 214202_at    |                   | -0,67  | 3,659 |
| 224455_s_at  | ADPGK             | -0,67  | 4,169 |
| 228006_at    | PTEN              | -0,67  | 2,593 |
| 236115_at    | HTR7P1            | -0,67  | 2,499 |
| 205059_s_at  | IDUA              | -0,671 | 2,723 |
| 208741_at    | SAP18             | -0,671 | 2,93  |
| 221834_at    | LOC100507577///LC | -0,671 | 2,98  |
| 235327_x_at  | UBXN2A            | -0,671 | 3,156 |
| 243843_at    | N4BP2L1           | -0,671 | 2,389 |
| 1558459_s_at | LOC101928623///LC | -0,672 | 3,232 |
| 205283_at    | FKTN              | -0,672 | 2,623 |
| 211317_s_at  | CFLAR             | -0,672 | 2,464 |
| 236294_at    | HUWE1             | -0,673 | 3,336 |
| 1552347_at   | CRYZL1            | -0,674 | 2,851 |
| 202164_s_at  | CNOT8             | -0,674 | 4,244 |
| 224872_at    | DIP2B             | -0,674 | 5,085 |
| 228506_at    | NSMCE4A           | -0,674 | 2,279 |
| 201349_at    | SLC9A3R1          | -0,675 | 2,315 |
| 206335_at    | GALNS             | -0,675 | 2,435 |
| 1557119_a_at | ZNF575            | -0,676 | 2,79  |
| 230011_at    | MEI1              | -0,677 | 3,267 |
| 234977_at    | ZADH2             | -0,677 | 3,448 |
| 215040_at    | RNASEH2B          | -0,678 | 2,655 |
| 223206_s_at  | NMRAL1            | -0,678 | 3,052 |



Tabelle1

|              |                   |        |       |
|--------------|-------------------|--------|-------|
| 225929_s_at  | RNF213            | -0,678 | 2,339 |
| 204985_s_at  | TRAPPC6A          | -0,679 | 2,912 |
| 234981_x_at  | CMBL              | -0,679 | 2,476 |
| 202506_at    | SSFA2             | -0,68  | 3,344 |
| 232470_at    | SIK1              | -0,68  | 2,498 |
| 236283_x_at  | LOC646214         | -0,68  | 3,365 |
| 202370_s_at  | CBFB              | -0,681 | 2,22  |
| 35974_at     | LRMP              | -0,681 | 2,301 |
| 201290_at    | SEC11A            | -0,682 | 2,528 |
| 203855_at    | WDR47             | -0,682 | 3,934 |
| 1553639_a_at | PPARGC1B          | -0,683 | 2,405 |
| 216294_s_at  | KIAA1109          | -0,684 | 2,734 |
| 217294_s_at  | ENO1              | -0,684 | 2,244 |
| 242451_x_at  | RPS19             | -0,684 | 2,202 |
| 216194_s_at  | TBCB              | -0,686 | 3,651 |
| 226294_x_at  | FAM91A1           | -0,686 | 5,264 |
| 225583_at    | UXS1              | -0,687 | 2,768 |
| 221816_s_at  | PHF11             | -0,688 | 4,023 |
| 243210_at    |                   | -0,688 | 2,757 |
| 200663_at    | CD63              | -0,689 | 2,338 |
| 202702_at    | TRIM26            | -0,689 | 4,87  |
| 217905_at    | MCMBP             | -0,689 | 4,273 |
| 230590_at    |                   | -0,689 | 2,199 |
| 210822_at    | RPL13P5///LRRC23  | -0,69  | 2,724 |
| 213082_s_at  | SLC35D2           | -0,69  | 2,179 |
| 218821_at    | LOC100652930///S1 | -0,69  | 2,462 |
| 221905_at    | CYLD              | -0,691 | 2,364 |
| 228742_at    |                   | -0,691 | 2,491 |
| 232543_x_at  | ARHGAP9           | -0,691 | 2,834 |
| 217865_at    | RNF130            | -0,693 | 2,597 |
| 222687_s_at  | ACER3             | -0,693 | 2,418 |
| 207122_x_at  | SULT1A2           | -0,694 | 2,218 |
| 213160_at    | DOCK2             | -0,694 | 4,113 |
| 216153_x_at  | RECK              | -0,695 | 2,886 |
| 243537_at    |                   | -0,695 | 2,2   |
| 202161_at    | PKN1              | -0,697 | 3,415 |
| 203182_s_at  | SRPK2             | -0,697 | 3,052 |
| 214272_at    | CYLD              | -0,697 | 2,612 |
| 217794_at    | PRR13             | -0,697 | 3,418 |
| 229223_at    |                   | -0,697 | 2,747 |
| 238668_at    | NCKAP1L           | -0,697 | 5,058 |
| 212288_at    | FNBP1             | -0,698 | 3,782 |
| 214388_at    |                   | -0,698 | 2,727 |
| 224517_at    | POLR2J4           | -0,698 | 2,204 |
| 43511_s_at   | ARRB1             | -0,698 | 3,047 |
| 1557353_at   |                   | -0,699 | 3,395 |
| 211250_s_at  | SH3BP2            | -0,699 | 2,276 |
| 212838_at    | DNMBP             | -0,699 | 2,632 |
| 221761_at    | ADSS              | -0,699 | 4,057 |
| 1558699_a_at | HERPUD2           | -0,7   | 2,421 |
| 211725_s_at  | BID               | -0,7   | 2,348 |
| 218668_s_at  | RAP2C             | -0,7   | 3,227 |
| 236707_at    | DAPP1             | -0,7   | 3,717 |
| 1563549_a_at | ANO8              | -0,701 | 2,649 |
| 200011_s_at  | ARF3              | -0,701 | 4,124 |
| 203833_s_at  | TGOLN2            | -0,702 | 2,683 |
| 212209_at    | MED13L            | -0,702 | 3,102 |
| 229982_at    | QSER1             | -0,702 | 4,461 |
| 1552536_at   | VTI1A             | -0,703 | 2,245 |
| 1554091_a_at | TIRAP             | -0,703 | 2,189 |
| 200940_s_at  | RERE              | -0,706 | 3,198 |
| 205905_s_at  | MICA///MICB       | -0,706 | 3,885 |
| 205642_at    | CNTRL             | -0,707 | 2,861 |

Tabelle1

|              |                   |        |       |
|--------------|-------------------|--------|-------|
| 212117_at    | RHOQ              | -0,708 | 3,375 |
| 223264_at    | MESDC1            | -0,708 | 3,637 |
| 224747_at    | UBE2Q2            | -0,708 | 3,511 |
| 228156_at    |                   | -0,709 | 2,555 |
| 1568600_at   | CALML4            | -0,71  | 4,187 |
| 212521_s_at  | PDE8A             | -0,71  | 2,374 |
| 224749_at    | FAM234A           | -0,71  | 3,164 |
| 218214_at    | ATG101            | -0,711 | 3,573 |
| 218988_at    | SLC35E3           | -0,711 | 3,165 |
| 1554178_a_at | FAM126B           | -0,712 | 3,644 |
| 202368_s_at  | TRAM2             | -0,712 | 2,765 |
| 222576_s_at  | AGO1              | -0,712 | 4,243 |
| 235536_at    | SNORD89           | -0,712 | 2,384 |
| 244050_at    | HACD4             | -0,712 | 2,247 |
| 201401_s_at  | GRK2              | -0,713 | 3,114 |
| 211021_s_at  | RGS14             | -0,713 | 2,188 |
| 213022_s_at  | UTRN              | -0,713 | 3,87  |
| 218229_s_at  | POGK              | -0,713 | 3,477 |
| 34406_at     | PACS2             | -0,713 | 6,748 |
| 209269_s_at  | SYK               | -0,714 | 2,549 |
| 212795_at    | KIAA1033          | -0,714 | 3,873 |
| 236484_at    |                   | -0,714 | 3,129 |
| 220363_s_at  | ELMO2             | -0,715 | 4,834 |
| 225546_at    | LOC101930123///EE | -0,715 | 2,628 |
| 39705_at     | SIN3B             | -0,715 | 3,697 |
| 211926_s_at  | MYH9              | -0,716 | 3,124 |
| 214369_s_at  | RASGRP2           | -0,716 | 3,805 |
| 221260_s_at  | CSRNP2            | -0,716 | 2,252 |
| 232297_at    | KLHL5             | -0,716 | 3,06  |
| 238714_at    |                   | -0,716 | 2,654 |
| 227017_at    | ERICH1            | -0,717 | 4,43  |
| 227549_x_at  | ZDHHC24           | -0,717 | 2,239 |
| 211985_s_at  | CALM3///CALM2///C | -0,718 | 2,237 |
| 204101_at    | MTM1              | -0,719 | 2,901 |
| 235242_at    | REL               | -0,719 | 2,483 |
| 1552977_a_at | CNPY3             | -0,72  | 2,979 |
| 224451_x_at  | ARHGAP9           | -0,72  | 2,652 |
| 1552717_s_at | CEP170P1///CEP17  | -0,721 | 2,675 |
| 1562022_s_at | LOC100130987///R/ | -0,721 | 2,194 |
| 209948_at    | KCNMB1            | -0,721 | 2,518 |
| 217943_s_at  | MAP7D1            | -0,721 | 4,445 |
| 1555083_at   | RPL13AP17         | -0,722 | 2,956 |
| 204674_at    | LRMP              | -0,722 | 2,639 |
| 227811_at    | FGD3              | -0,722 | 2,214 |
| 242554_at    | TPCN2             | -0,722 | 2,48  |
| 226314_at    | CHST14            | -0,723 | 2,517 |
| 209575_at    | IL10RB            | -0,724 | 2,521 |
| 217656_at    |                   | -0,724 | 2,595 |
| 212221_x_at  | IDS               | -0,726 | 2,336 |
| 212774_at    | ZBTB18            | -0,726 | 2,729 |
| 213173_at    | PCNX1             | -0,728 | 4,366 |
| 205891_at    | ADORA2B           | -0,729 | 2,21  |
| 202546_at    | VAMP8             | -0,73  | 2,617 |
| 222058_at    | RNF130            | -0,73  | 2,477 |
| 200729_s_at  | ACTR2             | -0,732 | 4,831 |
| 218499_at    | STK26             | -0,732 | 2,867 |
| 221078_s_at  | CCDC88A           | -0,733 | 4,355 |
| 205270_s_at  | LCP2              | -0,734 | 2,81  |
| 1554517_x_at | LINC00537         | -0,735 | 2,49  |
| 203315_at    | NCK2              | -0,735 | 2,26  |
| 219190_s_at  | AGO4              | -0,735 | 4,103 |
| 213513_x_at  | ARPC2             | -0,736 | 5,064 |
| 218019_s_at  | PDXK              | -0,736 | 2,428 |

Tabelle1

|              |                  |        |       |
|--------------|------------------|--------|-------|
| 218142_s_at  | CRBN             | -0,736 | 3,432 |
| 228296_at    | YPEL1            | -0,736 | 3,254 |
| 212522_at    | PDE8A            | -0,737 | 3,248 |
| 224649_x_at  | CCNY             | -0,737 | 2,436 |
| 239388_at    | RNASSET2         | -0,737 | 2,494 |
| 204968_at    | C6orf47          | -0,738 | 2,823 |
| 206722_s_at  | LPAR2            | -0,739 | 3,02  |
| 228111_s_at  | DNAH1            | -0,739 | 2,307 |
| 214449_s_at  | RHOQ             | -0,74  | 2,898 |
| 203007_x_at  | LYPLA1           | -0,741 | 3,914 |
| 237105_at    | LOC101927027     | -0,741 | 2,412 |
| 224834_at    | UBTD2            | -0,743 | 4,012 |
| 236614_at    | LOC729683        | -0,745 | 3,187 |
| 1559067_a_at | LOC158402        | -0,746 | 2,353 |
| 228548_at    | RAP1A            | -0,746 | 4,62  |
| 239445_at    |                  | -0,746 | 2,271 |
| 214293_at    | SEPT11           | -0,747 | 2,493 |
| 225365_at    | ZDHHC20          | -0,747 | 3,329 |
| 236779_at    | MRPS5            | -0,747 | 2,98  |
| 224800_at    | WDFY1            | -0,748 | 2,62  |
| 226422_at    | ERGIC2           | -0,748 | 3,84  |
| 227260_at    |                  | -0,748 | 2,477 |
| 207719_x_at  | CEP170P1///CEP17 | -0,749 | 2,902 |
| 227565_at    | KLHL5            | -0,749 | 3,396 |
| 236625_at    |                  | -0,749 | 2,716 |
| 241910_x_at  | ARL17B///ARL17A  | -0,749 | 4,207 |
| 244234_at    |                  | -0,749 | 2,446 |
| 244808_at    | GRAMD1A          | -0,749 | 2,71  |
| 206296_x_at  | MAP4K1           | -0,75  | 2,212 |
| 217456_x_at  | HLA-E            | -0,75  | 3,257 |
| 201126_s_at  | MGAT1            | -0,751 | 3,003 |
| 209005_at    | FBXL5            | -0,751 | 2,573 |
| 233645_s_at  | C1RL             | -0,751 | 2,464 |
| 238485_at    | IQCH-AS1         | -0,751 | 2,325 |
| 238912_x_at  | C9orf85          | -0,751 | 2,793 |
| 48825_at     | ING4             | -0,751 | 2,668 |
| 201288_at    | ARHGDIB          | -0,752 | 5,893 |
| 214715_x_at  | ZNF160           | -0,752 | 2,417 |
| 217931_at    | CNPY3            | -0,752 | 3,772 |
| 202329_at    | CSK              | -0,754 | 3,255 |
| 201389_at    | ITGA5            | -0,755 | 2,328 |
| 32837_at     | AGPAT2           | -0,755 | 5,901 |
| 242263_at    | TMED5            | -0,756 | 3,931 |
| 55081_at     | MICALL1          | -0,756 | 2,652 |
| 227776_at    | ACER3            | -0,757 | 2,621 |
| 228899_at    |                  | -0,757 | 2,362 |
| 203014_x_at  | SGSM3            | -0,758 | 5,077 |
| 203647_s_at  | FDX1             | -0,758 | 3,997 |
| 217197_x_at  | N4BP2L1          | -0,758 | 2,19  |
| 203604_at    | ZNF516           | -0,759 | 2,702 |
| 210148_at    | HIPK3            | -0,759 | 2,278 |
| 211085_s_at  | STK4             | -0,759 | 2,944 |
| 200905_x_at  | HLA-E            | -0,76  | 2,92  |
| 202764_at    | STIM1            | -0,76  | 3,617 |
| 221276_s_at  | SYNC             | -0,76  | 3,591 |
| 1560622_at   |                  | -0,761 | 2,448 |
| 228369_at    | CNPY3            | -0,761 | 4,758 |
| 240600_at    |                  | -0,761 | 2,688 |
| 1554834_a_at | RASSF5           | -0,762 | 2,187 |
| 205248_at    | DOPEY2           | -0,763 | 5,175 |
| 201781_s_at  | AIP              | -0,764 | 3,56  |
| 209342_s_at  | IKBKB            | -0,764 | 4,028 |
| 213159_at    | PCNX1            | -0,764 | 3,069 |

Tabelle1

|             |                    |        |       |
|-------------|--------------------|--------|-------|
| 227983_at   | RILPL2             | -0,765 | 3,093 |
| 208965_s_at | IFI16              | -0,766 | 2,207 |
| 210057_at   | LOC101060386///BC  | -0,766 | 3,006 |
| 232356_at   |                    | -0,766 | 2,333 |
| 201448_at   | TIA1               | -0,767 | 2,531 |
| 203006_at   | INPP5A             | -0,767 | 2,593 |
| 235862_at   |                    | -0,767 | 2,962 |
| 205469_s_at | IRF5               | -0,768 | 2,346 |
| 215179_x_at | PGF                | -0,769 | 2,211 |
| 219161_s_at | CKLF-CMTM1///CKL   | -0,769 | 2,27  |
| 203080_s_at | BAZ2B              | -0,77  | 2,621 |
| 203113_s_at | EEF1D              | -0,77  | 3,796 |
| 211323_s_at | ITPR1              | -0,77  | 2,227 |
| 218158_s_at | APPL1              | -0,77  | 4,005 |
| 226217_at   | SLC30A7            | -0,77  | 4,76  |
| 203306_s_at | SLC35A1            | -0,771 | 2,344 |
| 203402_at   | KCNAB2             | -0,771 | 3,531 |
| 216858_x_at |                    | -0,771 | 2,215 |
| 226143_at   | RAI1               | -0,772 | 2,359 |
| 229741_at   | MAVS               | -0,772 | 4,02  |
| 242407_at   |                    | -0,772 | 3,038 |
| 243539_at   | KIAA1841           | -0,773 | 2,433 |
| 37384_at    | PPM1F              | -0,773 | 2,768 |
| 201460_at   | MAPKAPK2           | -0,774 | 4,652 |
| 211930_at   | HNRNPA3            | -0,774 | 2,275 |
| 217286_s_at | NDRG3              | -0,774 | 4,557 |
| 219020_at   | HS1BP3             | -0,774 | 3,237 |
| 232209_x_at | HM13               | -0,774 | 4,48  |
| 205510_s_at | FLJ10038           | -0,775 | 3,172 |
| 224733_at   | CMTM3              | -0,775 | 4,294 |
| 212368_at   | ZNF292             | -0,776 | 4,176 |
| 228727_at   | ANXA11             | -0,776 | 3,618 |
| 212875_s_at | C2CD2              | -0,777 | 2,229 |
| 214132_at   | ATP5C1             | -0,777 | 2,242 |
| 216187_x_at |                    | -0,777 | 2,524 |
| 222252_x_at | UBQLN4             | -0,777 | 2,377 |
| 224921_at   | SCAMP2             | -0,777 | 3,747 |
| 200728_at   | ACTR2              | -0,778 | 5,18  |
| 208047_s_at | NAB1               | -0,778 | 2,967 |
| 242019_at   | CERS6              | -0,778 | 2,486 |
| 208679_s_at | ARPC2              | -0,78  | 4,923 |
| 208763_s_at | TSC22D3            | -0,781 | 2,906 |
| 209061_at   | NCOA3              | -0,781 | 4,499 |
| 225269_s_at | RBMS1              | -0,781 | 3,184 |
| 203843_at   | RPS6KA3            | -0,782 | 3,516 |
| 209341_s_at | IKBKB              | -0,782 | 4,088 |
| 222721_at   | CNIH4              | -0,782 | 2,396 |
| 223488_s_at | GNB4               | -0,782 | 2,976 |
| 235388_at   | CHD9               | -0,782 | 2,437 |
| 220788_s_at | RNF31///IRF9       | -0,783 | 3,214 |
| 225003_at   | TMEM205            | -0,783 | 3,157 |
| 235352_at   | MR1                | -0,783 | 2,553 |
| 202664_at   | WIPF1              | -0,784 | 2,682 |
| 243264_s_at | C8orf44-SGK3///C8c | -0,784 | 3,023 |
| 224811_at   | LPP                | -0,785 | 4,092 |
| 228677_s_at | RASAL3             | -0,785 | 3,142 |
| 203981_s_at | ABCD4              | -0,786 | 2,826 |
| 235302_at   | GPATCH2L           | -0,786 | 3,121 |
| 240234_at   |                    | -0,786 | 3,38  |
| 215519_x_at | SGSM3              | -0,787 | 5,365 |
| 238040_at   |                    | -0,787 | 2,648 |
| 1567045_at  |                    | -0,788 | 2,396 |
| 208659_at   | CLIC1              | -0,788 | 3,838 |

Tabelle1

|              |              |        |       |
|--------------|--------------|--------|-------|
| 209011_at    | TRIO         | -0,788 | 2,2   |
| 213572_s_at  | SERPINB1     | -0,788 | 2,697 |
| 228037_at    | RARA-AS1     | -0,788 | 2,664 |
| 232386_at    | VPS13C       | -0,788 | 3,778 |
| 244251_at    | LCP2         | -0,788 | 3,568 |
| 1557411_s_at | SLC25A43     | -0,789 | 2,995 |
| 204861_s_at  | NAIP         | -0,789 | 3,798 |
| 223158_s_at  | NEK6         | -0,789 | 2,287 |
| 226975_at    | RNPC3        | -0,789 | 3,271 |
| 203713_s_at  | LLGL2        | -0,791 | 3,258 |
| 206928_at    | ZNF124       | -0,791 | 3,384 |
| 220566_at    | PIK3R5       | -0,792 | 3,676 |
| 226728_at    | SLC27A1      | -0,792 | 4,168 |
| 227068_at    | PGK1         | -0,792 | 3,851 |
| 205505_at    | GCNT1        | -0,793 | 2,273 |
| 212119_at    | RHOQ         | -0,793 | 3,923 |
| 229905_at    | RAP1GDS1     | -0,793 | 3,729 |
| 233748_x_at  | PRKAG2       | -0,793 | 4,292 |
| 1554637_a_at | CBFA2T2      | -0,794 | 3,156 |
| 222284_at    |              | -0,794 | 2,397 |
| 228932_at    | AGO3         | -0,794 | 4,738 |
| 1558770_a_at | PIK3R6       | -0,795 | 2,567 |
| 201782_s_at  | AIP          | -0,795 | 8,029 |
| 212417_at    | SCAMP1       | -0,795 | 3,192 |
| 219994_at    | APBB1IP      | -0,795 | 3,111 |
| 227009_at    | LOC100507431 | -0,795 | 2,876 |
| 239641_at    | SENCR        | -0,795 | 2,925 |
| 202957_at    | HCLS1        | -0,796 | 4,317 |
| 218958_at    | C19orf60     | -0,797 | 4,039 |
| 226995_at    | LOC642852    | -0,797 | 3,936 |
| 217297_s_at  | MYO9B        | -0,798 | 3,073 |
| 242911_at    | MED13L       | -0,798 | 2,574 |
| 1556306_at   |              | -0,799 | 2,22  |
| 205269_at    | LCP2         | -0,799 | 2,7   |
| 208325_s_at  | AKAP13       | -0,799 | 4,767 |
| 232722_at    | RNASSET2     | -0,799 | 2,2   |
| 1563641_a_at | SNX20        | -0,8   | 3,572 |
| 226395_at    | HOOK3        | -0,8   | 2,513 |
| 213039_at    | ARHGEF18     | -0,801 | 4,019 |
| 224887_at    | GNPTG        | -0,801 | 4,359 |
| 239486_at    | REL          | -0,801 | 3,578 |
| 218093_s_at  | ANKRD10      | -0,802 | 4,103 |
| 214894_x_at  | MACF1        | -0,803 | 4,789 |
| 200677_at    | PTTG1IP      | -0,804 | 4,64  |
| 227087_at    | INPP4A       | -0,804 | 2,564 |
| 234312_s_at  | ACSS2        | -0,805 | 2,559 |
| 212040_at    | TGOLN2       | -0,806 | 4,581 |
| 221980_at    | EMILIN2      | -0,806 | 2,328 |
| 225230_at    | DRAM2        | -0,806 | 3,496 |
| 227120_at    | FOXP4        | -0,807 | 2,419 |
| 227594_at    | ZMYM6        | -0,807 | 3,566 |
| 213448_at    |              | -0,808 | 5,078 |
| 34726_at     | CACNB3       | -0,808 | 2,273 |
| 49111_at     | ARRB1        | -0,808 | 3,065 |
| 212888_at    | DICER1       | -0,809 | 3,445 |
| 235603_at    | HNRNPU       | -0,809 | 4,22  |
| 218818_at    | FHL3         | -0,81  | 2,225 |
| 227640_s_at  | RP9P///RP9   | -0,81  | 5,025 |
| 210188_at    | GABPA        | -0,811 | 2,927 |
| 203603_s_at  | ZEB2         | -0,813 | 2,409 |
| 211200_s_at  | EFCAB2       | -0,813 | 2,262 |
| 225950_at    | SAMD8        | -0,813 | 2,57  |
| 200797_s_at  | MCL1         | -0,814 | 2,737 |

Tabelle1

|              |                   |        |       |
|--------------|-------------------|--------|-------|
| 215075_s_at  | GRB2              | -0,814 | 3,563 |
| 227268_at    | RNFT1             | -0,814 | 3,213 |
| 229833_at    | ALOX12-AS1        | -0,814 | 2,192 |
| 213450_s_at  | ICOSLG            | -0,815 | 3,257 |
| 235533_at    | COX19             | -0,815 | 4,271 |
| 36920_at     | MTM1              | -0,815 | 4,233 |
| 1554571_at   | APBB1IP           | -0,816 | 3,59  |
| 218913_s_at  | GMIP              | -0,816 | 3,532 |
| 217482_at    |                   | -0,817 | 2,226 |
| 224261_at    |                   | -0,817 | 3,522 |
| 221643_s_at  | RERE              | -0,818 | 3,364 |
| 228861_at    | CDS2              | -0,818 | 4,051 |
| 232685_at    |                   | -0,818 | 2,244 |
| 212588_at    | PTPRC             | -0,819 | 3,604 |
| 218780_at    | HOOK2             | -0,82  | 3,185 |
| 237424_at    |                   | -0,82  | 3,11  |
| 222842_at    | AGO4              | -0,821 | 3,12  |
| 206036_s_at  | REL               | -0,822 | 3,04  |
| 209306_s_at  | SWAP70            | -0,822 | 2,574 |
| 209377_s_at  | HMG3              | -0,822 | 2,879 |
| 239077_at    | CSGALNACT2        | -0,822 | 2,797 |
| 225647_s_at  | CTSC              | -0,823 | 2,206 |
| 234710_s_at  | PARP6             | -0,823 | 7,724 |
| 239944_at    |                   | -0,823 | 2,792 |
| 212069_s_at  | PRRC2B            | -0,824 | 4,653 |
| 228801_at    | ORMDL1            | -0,824 | 5,613 |
| 243495_s_at  | ZNF652            | -0,824 | 2,328 |
| 243957_at    | LOC100128108      | -0,824 | 2,334 |
| 1552678_a_at | USP28             | -0,825 | 4,516 |
| 200737_at    | PGK1              | -0,825 | 4,256 |
| 201646_at    | SCARB2            | -0,825 | 3,404 |
| 208729_x_at  | HLA-B             | -0,825 | 2,68  |
| 220215_at    | ZNF669            | -0,825 | 2,631 |
| 221014_s_at  | RAB33B            | -0,825 | 2,583 |
| 225527_at    | CEBPG             | -0,825 | 3,58  |
| 231848_x_at  | ZNF207            | -0,825 | 2,316 |
| 203490_at    | ELF4              | -0,826 | 2,241 |
| 218870_at    | LOC101928361///AF | -0,826 | 3,683 |
| 223082_at    | SH3KBP1           | -0,826 | 4,028 |
| 239469_at    |                   | -0,826 | 2,48  |
| 202626_s_at  | LYN               | -0,827 | 2,348 |
| 206687_s_at  | PTPN6             | -0,827 | 3,405 |
| 209179_s_at  | MBOAT7            | -0,827 | 2,565 |
| 201534_s_at  | UBL3              | -0,829 | 2,476 |
| 201598_s_at  | INPPL1            | -0,829 | 5,496 |
| 216524_x_at  |                   | -0,829 | 2,678 |
| 234299_s_at  | NIN               | -0,829 | 4,497 |
| 234788_x_at  |                   | -0,83  | 3,236 |
| 235744_at    | PPTC7             | -0,83  | 3,345 |
| 239161_at    | FDX1              | -0,83  | 3,148 |
| 1565651_at   |                   | -0,831 | 2,698 |
| 208817_at    | COMT              | -0,831 | 3,007 |
| 238759_at    | CCDC88A           | -0,831 | 3,327 |
| 220594_at    | OGT               | -0,832 | 2,517 |
| 230925_at    | APBB1IP           | -0,832 | 3,359 |
| 244661_at    | SOAT1             | -0,833 | 2,484 |
| 227999_at    | PWWP2B            | -0,834 | 3,837 |
| 233559_s_at  | WDFY1             | -0,834 | 3,127 |
| 1556373_a_at | FAM185A           | -0,835 | 2,908 |
| 200632_s_at  | NDRG1             | -0,835 | 2,236 |
| 208478_s_at  | BAX               | -0,835 | 3,977 |
| 1553117_a_at | STK38             | -0,836 | 2,22  |
| 208633_s_at  | MACF1             | -0,836 | 3,48  |

Tabelle1

|              |                   |        |       |
|--------------|-------------------|--------|-------|
| 60471_at     | RIN3              | -0,836 | 3,197 |
| 201330_at    | RARS              | -0,837 | 3,694 |
| 226335_at    | RPS6KA3           | -0,837 | 4,538 |
| 242433_at    | ZBTB11            | -0,837 | 2,936 |
| 201003_x_at  | TMEM189-UBE2V1/   | -0,838 | 3,287 |
| 210754_s_at  | LYN               | -0,838 | 2,643 |
| 211963_s_at  | ARPC5             | -0,839 | 2,231 |
| 214808_at    |                   | -0,84  | 2,782 |
| 225265_at    | RBMS1             | -0,84  | 2,473 |
| 225473_at    | SOGA1             | -0,84  | 6,118 |
| 209012_at    | TRIO              | -0,841 | 2,926 |
| 212144_at    | SUN2              | -0,841 | 4,351 |
| 214895_s_at  | ADAM10            | -0,841 | 2,913 |
| 225833_at    | DAGLB             | -0,841 | 2,924 |
| 226840_at    | H2AFY             | -0,841 | 2,292 |
| 228521_s_at  | MIA-RAB4B///RAB4/ | -0,842 | 2,883 |
| 215706_x_at  | ZYX               | -0,843 | 2,428 |
| 218746_at    | TAPBPL            | -0,843 | 4,1   |
| 226381_at    | SLC35F5           | -0,844 | 3,597 |
| 227743_at    | MYO15B            | -0,844 | 2,619 |
| 1552621_at   | UPK3BL///POLR2J3  | -0,845 | 2,354 |
| 201319_at    | MYL12A            | -0,845 | 2,787 |
| 209307_at    | SWAP70            | -0,845 | 2,38  |
| 210556_at    | NFATC3            | -0,845 | 2,754 |
| 210788_s_at  | DHRS7             | -0,845 | 3,56  |
| 213373_s_at  | CASP8             | -0,845 | 3,852 |
| 222646_s_at  | ERO1A             | -0,845 | 3,517 |
| 224686_x_at  | LRRRC37A2         | -0,845 | 3,525 |
| 216621_at    |                   | -0,846 | 2,424 |
| 225921_at    | NIN               | -0,846 | 5,191 |
| 239027_at    | DOCK8             | -0,846 | 4,359 |
| 217947_at    | CMTM6             | -0,847 | 6,434 |
| 221753_at    | SSH1              | -0,847 | 7,718 |
| 1554638_at   | ZFYVE16           | -0,848 | 2,22  |
| 221865_at    | TMEM268           | -0,848 | 2,582 |
| 215222_x_at  | MACF1             | -0,849 | 3,99  |
| 226782_at    | SLC25A30          | -0,849 | 2,358 |
| 209422_at    | PHF20             | -0,85  | 4,565 |
| 1556416_s_at |                   | -0,852 | 2,881 |
| 214847_s_at  | GPSM3             | -0,852 | 2,653 |
| 219191_s_at  | BIN2              | -0,852 | 2,608 |
| 229549_at    | CALU              | -0,852 | 4,466 |
| 238480_at    | TTC39C            | -0,852 | 2,739 |
| 64899_at     | PLPPR2            | -0,852 | 2,257 |
| 202792_s_at  | PPP6R2            | -0,853 | 4,621 |
| 225831_at    | LUZP1             | -0,853 | 2,402 |
| 201040_at    | GNAI2             | -0,854 | 3,698 |
| 204923_at    | SASH3             | -0,854 | 3,008 |
| 225045_at    | CCDC88A           | -0,854 | 3,324 |
| 235463_s_at  | CERS6             | -0,854 | 3,455 |
| 1560199_x_at |                   | -0,855 | 2,534 |
| 224793_s_at  | TGFBR1            | -0,855 | 4,002 |
| 235879_at    |                   | -0,855 | 2,253 |
| 212122_at    | RHOQ              | -0,856 | 3,642 |
| 230892_at    |                   | -0,856 | 3,323 |
| 1556049_at   | RTN4              | -0,857 | 3,204 |
| 217826_s_at  | UBE2J1            | -0,857 | 3,893 |
| 226607_at    | C20orf194         | -0,857 | 2,997 |
| 232188_at    | AKAP13            | -0,857 | 2,818 |
| 235252_at    | KSR1              | -0,857 | 2,753 |
| 31845_at     | ELF4              | -0,857 | 2,694 |
| 204169_at    | IMPDH1            | -0,858 | 3,548 |
| 226392_at    | RASA2             | -0,858 | 3,006 |

Tabelle1

|              |                   |        |       |
|--------------|-------------------|--------|-------|
| 226568_at    | FAM102B           | -0,858 | 3,129 |
| 201302_at    | ANXA4             | -0,859 | 2,466 |
| 232681_at    |                   | -0,859 | 2,828 |
| 205191_at    | RP2               | -0,86  | 2,316 |
| 234675_x_at  |                   | -0,86  | 2,655 |
| 226640_at    | DAGLB             | -0,861 | 2,789 |
| 36612_at     | FAM168A           | -0,861 | 3,144 |
| 213710_s_at  | CALM1             | -0,862 | 2,416 |
| 210786_s_at  | FLI1              | -0,863 | 3,397 |
| 212124_at    | ZMIZ1             | -0,863 | 3,581 |
| 224929_at    | TMEM173           | -0,863 | 2,609 |
| 204756_at    | MAP2K5            | -0,864 | 4,355 |
| 206090_s_at  | TSNAX-DISC1///DIS | -0,865 | 3,174 |
| 207436_x_at  | SORBS1            | -0,865 | 5,395 |
| 214786_at    | MAP3K1            | -0,865 | 2,751 |
| 230099_at    |                   | -0,865 | 2,794 |
| 217540_at    | NXPE3             | -0,866 | 2,546 |
| 223464_at    | OSBPL5            | -0,866 | 2,36  |
| 231235_at    | NKTR              | -0,866 | 2,251 |
| 1555705_a_at | CMTM3             | -0,867 | 4,691 |
| 225530_at    | MOB3A             | -0,867 | 2,589 |
| 213742_at    | SRSF11            | -0,872 | 2,691 |
| 219453_at    | KLHL36            | -0,872 | 3,786 |
| 90610_at     | LRCH4             | -0,872 | 7,344 |
| 201647_s_at  | SCARB2            | -0,873 | 4,65  |
| 212702_s_at  | BICD2             | -0,873 | 5,203 |
| 212796_s_at  | TBC1D2B           | -0,873 | 3,998 |
| 214752_x_at  | FLNA              | -0,873 | 3,302 |
| 214693_x_at  | NBPF26///NBPF10// | -0,874 | 3,284 |
| 238130_at    | NFATC2IP          | -0,874 | 2,859 |
| 208699_x_at  | TKT               | -0,875 | 2,549 |
| 207358_x_at  | MACF1             | -0,876 | 4,551 |
| 207419_s_at  | RAC2              | -0,876 | 2,567 |
| 229141_at    | SFT2D3///WDR33    | -0,876 | 2,816 |
| 202663_at    | WIPF1             | -0,877 | 4,247 |
| 222923_s_at  | KCNE3             | -0,877 | 2,463 |
| 224698_at    | ESYT2             | -0,877 | 4,093 |
| 221497_x_at  | EGLN1             | -0,878 | 2,626 |
| 226601_at    | SLC30A7           | -0,878 | 3,948 |
| 203149_at    | NECTIN2           | -0,879 | 2,615 |
| 230820_at    | SMURF2            | -0,879 | 3,151 |
| 200625_s_at  | CAP1              | -0,88  | 4,404 |
| 212366_at    | ZNF292            | -0,88  | 3,944 |
| 212706_at    | LOC102724229///R/ | -0,88  | 2,3   |
| 219165_at    | PDLIM2            | -0,88  | 2,854 |
| 225750_at    | ERO1A             | -0,88  | 4,5   |
| 219099_at    | TIGAR             | -0,882 | 2,186 |
| 240592_at    | LCORL             | -0,882 | 3,294 |
| 202604_x_at  | ADAM10            | -0,883 | 3,229 |
| 223398_at    | CARD19            | -0,883 | 3,193 |
| 226663_at    | ANKRD10-IT1       | -0,884 | 2,866 |
| 233053_at    |                   | -0,884 | 2,658 |
| 219275_at    | PDCD5             | -0,885 | 2,975 |
| 213023_at    | UTRN              | -0,886 | 5,193 |
| 221139_s_at  | CSAD              | -0,887 | 3,362 |
| 238170_at    |                   | -0,888 | 3,111 |
| 201861_s_at  | LRRFIP1           | -0,891 | 4,88  |
| 1554608_at   | TGOLN2            | -0,892 | 2,61  |
| 214582_at    | PDE3B             | -0,892 | 2,186 |
| 202566_s_at  | SVIL              | -0,893 | 2,405 |
| 227501_at    |                   | -0,893 | 2,309 |
| 207735_at    | RNF125            | -0,894 | 3,174 |
| 227981_at    | CYB561D1          | -0,894 | 3,433 |



Tabelle1

|              |                  |        |       |
|--------------|------------------|--------|-------|
| 240240_at    |                  | -0,895 | 2,34  |
| 225360_at    | TRABD            | -0,896 | 4,55  |
| 219711_at    | ZNF586           | -0,897 | 4,029 |
| 232876_at    |                  | -0,897 | 2,889 |
| 239619_at    |                  | -0,897 | 2,193 |
| 205603_s_at  | DIAPH2           | -0,898 | 3,924 |
| 205668_at    | LY75             | -0,899 | 3,25  |
| 222587_s_at  | GALNT7           | -0,899 | 3,661 |
| 209043_at    | PAPSS1           | -0,9   | 3,717 |
| 211825_s_at  | FLI1             | -0,9   | 3,467 |
| 201559_s_at  | CLIC4            | -0,901 | 2,576 |
| 208611_s_at  | SPTAN1           | -0,901 | 4,527 |
| 225622_at    | PAG1             | -0,903 | 2,217 |
| 1558080_s_at | DNAJC3           | -0,904 | 3,06  |
| 200661_at    | CTSA             | -0,905 | 2,372 |
| 234148_at    |                  | -0,907 | 2,533 |
| 240198_at    |                  | -0,907 | 4,431 |
| 201315_x_at  | IFITM2           | -0,908 | 2,491 |
| 204048_s_at  | PHACTR2          | -0,908 | 3,045 |
| 204552_at    | INPP4A           | -0,908 | 3,847 |
| 225637_at    | DEF8             | -0,908 | 2,549 |
| 202009_at    | TWF2             | -0,909 | 7,425 |
| 204882_at    | ARHGAP25         | -0,909 | 2,995 |
| 203615_x_at  | SULT1A1          | -0,91  | 2,888 |
| 225136_at    | PLEKHA2          | -0,91  | 5,727 |
| 226338_at    | TMEM55A          | -0,91  | 2,234 |
| 201960_s_at  | MYCBP2           | -0,911 | 6,438 |
| 203620_s_at  | FCHSD2           | -0,911 | 4,938 |
| 1569004_at   | CARD8-AS1        | -0,913 | 3,23  |
| 243182_at    |                  | -0,913 | 2,848 |
| 226783_at    | PHYKPL           | -0,915 | 2,873 |
| 213725_x_at  | XYLT1            | -0,916 | 2,41  |
| 243601_at    | LOC285957        | -0,916 | 2,568 |
| 203826_s_at  | PITPNM1          | -0,917 | 2,738 |
| 38149_at     | ARHGAP25         | -0,917 | 4,391 |
| 203646_at    | FDX1             | -0,918 | 3,659 |
| 212707_s_at  | RASA4B///RASA4CI | -0,918 | 2,643 |
| 205726_at    | DIAPH2           | -0,919 | 3,104 |
| 213633_at    | SH3BP1           | -0,919 | 2,564 |
| 235912_at    |                  | -0,919 | 2,408 |
| 1569346_a_at |                  | -0,92  | 2,978 |
| 203044_at    | CHSY1            | -0,92  | 3,311 |
| 228722_at    | PRMT2            | -0,92  | 4,182 |
| 236292_at    | RNF130           | -0,92  | 4,031 |
| 243475_at    | CBL              | -0,92  | 3,701 |
| 223361_at    | ABRACL           | -0,921 | 3,962 |
| 201029_s_at  | CD99             | -0,922 | 3,158 |
| 204276_at    | TK2              | -0,922 | 2,984 |
| 211911_x_at  | HLA-B            | -0,922 | 3,43  |
| 221831_at    | LUZP1            | -0,925 | 3,021 |
| 244015_at    |                  | -0,925 | 2,587 |
| 203126_at    | IMPA2            | -0,926 | 3,85  |
| 208885_at    | LCP1             | -0,926 | 2,967 |
| 214322_at    | CAMK2G           | -0,926 | 3,353 |
| 205068_s_at  | ARHGAP26         | -0,927 | 3,115 |
| 243031_at    |                  | -0,927 | 2,458 |
| 1554569_a_at | CELF2            | -0,928 | 6,299 |
| 202990_at    | PYGL             | -0,928 | 2,648 |
| 239740_at    | ETV6             | -0,928 | 2,274 |
| 39582_at     | CYLD             | -0,928 | 4,334 |
| 1555420_a_at | KLF7             | -0,931 | 3,756 |
| 213229_at    | DICER1           | -0,931 | 5,761 |
| 232396_at    |                  | -0,931 | 3,027 |

Tabelle1

|              |                   |        |       |
|--------------|-------------------|--------|-------|
| 201487_at    | CTSC              | -0,932 | 2,716 |
| 232375_at    |                   | -0,933 | 2,259 |
| 212748_at    | MKL1              | -0,934 | 5,722 |
| 221875_x_at  | HLA-F             | -0,934 | 2,693 |
| 224916_at    | TMEM173           | -0,935 | 2,769 |
| 239598_s_at  | LPCAT2            | -0,936 | 2,5   |
| 229384_at    |                   | -0,937 | 3,68  |
| 1557236_at   | APOL6             | -0,938 | 3,271 |
| 215404_x_at  | FGFR1             | -0,939 | 2,756 |
| 233914_s_at  | SBF2              | -0,939 | 2,537 |
| 205213_at    | ACAP1             | -0,94  | 2,813 |
| 206061_s_at  | DICER1            | -0,94  | 5,453 |
| 212887_at    | SEC23A            | -0,94  | 5,396 |
| 231775_at    | TNFRSF10A         | -0,94  | 3,559 |
| 203055_s_at  | LOC100505585///AF | -0,941 | 5,911 |
| 224082_at    |                   | -0,941 | 3,712 |
| 1558275_at   |                   | -0,942 | 2,972 |
| 223314_at    | TSPAN14           | -0,942 | 2,221 |
| 207730_x_at  |                   | -0,943 | 2,87  |
| 218102_at    | DERA              | -0,943 | 3,758 |
| 217024_x_at  |                   | -0,944 | 2,201 |
| 204493_at    | BID               | -0,945 | 3,6   |
| 215147_at    |                   | -0,945 | 4,023 |
| 235547_at    | N4BP2L2           | -0,945 | 3,231 |
| 242693_at    |                   | -0,945 | 2,736 |
| 217513_at    | MILR1             | -0,946 | 2,739 |
| 237107_at    | PRKRA             | -0,946 | 2,383 |
| 205596_s_at  | SMURF2            | -0,947 | 5,088 |
| 205926_at    | IL27RA            | -0,947 | 5,626 |
| 226068_at    | SYK               | -0,947 | 4,389 |
| 202786_at    | STK39             | -0,948 | 4,323 |
| 212814_at    | AHCYL2            | -0,948 | 5,865 |
| 212959_s_at  | GNPTAB            | -0,948 | 3,942 |
| 214873_at    | LRP5L             | -0,948 | 2,52  |
| 218154_at    | GSDMD             | -0,948 | 4,928 |
| 242277_at    |                   | -0,948 | 2,244 |
| 229686_at    | P2RY8             | -0,95  | 3,597 |
| 238970_at    |                   | -0,95  | 2,287 |
| 229468_at    | TEN1-CDK3///CDK3  | -0,951 | 2,625 |
| 241965_at    |                   | -0,951 | 2,693 |
| 55692_at     | ELMO2             | -0,951 | 8,089 |
| 217823_s_at  | UBE2J1            | -0,952 | 4,387 |
| 220220_at    | LRRC37A2///LRRC3  | -0,953 | 2,491 |
| 1558254_s_at | SRPK2             | -0,954 | 4,196 |
| 204333_s_at  | AGA               | -0,954 | 4,409 |
| 212552_at    | HPCAL1            | -0,954 | 5,627 |
| 225558_at    | GIT2              | -0,954 | 4,991 |
| 225589_at    | SH3RF1            | -0,954 | 2,902 |
| 244592_at    |                   | -0,954 | 2,542 |
| 1555783_x_at | PQLC2             | -0,955 | 2,73  |
| 228120_at    | AGO1              | -0,955 | 8,232 |
| 235023_at    | VPS13C            | -0,955 | 3,07  |
| 215299_x_at  | SULT1A1           | -0,956 | 3,277 |
| 226362_at    |                   | -0,956 | 2,427 |
| 217253_at    | SH3BP2            | -0,957 | 3,064 |
| 226962_at    | ZBTB41            | -0,958 | 2,889 |
| 74694_s_at   | RABEP2            | -0,958 | 5,56  |
| 218943_s_at  | DDX58             | -0,959 | 2,907 |
| 234084_x_at  |                   | -0,96  | 2,424 |
| 222391_at    | TMEM30A           | -0,962 | 6,148 |
| 227489_at    | SMURF2            | -0,962 | 2,984 |
| 207556_s_at  | DGKZ              | -0,963 | 5,107 |
| 1558028_x_at | NORAD             | -0,964 | 4,732 |

Tabelle1

|              |                   |        |       |
|--------------|-------------------|--------|-------|
| 1566557_at   | BAIAP2-AS1        | -0,964 | 2,526 |
| 202205_at    | VASP              | -0,964 | 2,516 |
| 202262_x_at  | DDAH2             | -0,964 | 2,428 |
| 204215_at    | TMEM243           | -0,964 | 3,249 |
| 211445_x_at  | NACAP1            | -0,964 | 2,574 |
| 221861_at    | ARRB1             | -0,964 | 4,285 |
| 239247_at    | CD99P1            | -0,964 | 2,237 |
| 204494_s_at  | C15orf39          | -0,965 | 2,248 |
| 209118_s_at  | TUBA1A            | -0,965 | 3,186 |
| 212203_x_at  | IFITM3            | -0,965 | 2,242 |
| 212442_s_at  | CERS6             | -0,966 | 4,114 |
| 233510_s_at  | PARVG             | -0,967 | 4,528 |
| 202100_at    | RALB              | -0,968 | 3,979 |
| 227125_at    | IFNAR2            | -0,968 | 4,195 |
| 235122_at    | HIVEP3            | -0,968 | 2,665 |
| 225254_at    | CCDC97            | -0,969 | 4,22  |
| 212803_at    | NAB2              | -0,97  | 2,455 |
| 222173_s_at  | TBC1D2            | -0,97  | 2,18  |
| 200941_at    | HSBP1             | -0,971 | 7,038 |
| 243899_at    | ARL17B///ARL17A   | -0,972 | 2,745 |
| 208634_s_at  | MACF1             | -0,973 | 5,24  |
| 213222_at    | PLCB1             | -0,973 | 2,311 |
| 228754_at    | SLC6A6            | -0,973 | 3,562 |
| 215936_s_at  | KIAA1033          | -0,974 | 7,367 |
| 222358_x_at  |                   | -0,975 | 3,359 |
| 213326_at    | VAMP1             | -0,976 | 4,281 |
| 228623_at    |                   | -0,976 | 2,503 |
| 218421_at    | CERK              | -0,977 | 5,875 |
| 225178_at    | TTC14             | -0,977 | 3,317 |
| 238540_at    | LOC101928623///LC | -0,977 | 4,107 |
| 212860_at    | ZDHHC18           | -0,978 | 5,57  |
| 230713_at    |                   | -0,978 | 2,653 |
| 234997_x_at  |                   | -0,978 | 4,264 |
| 240432_x_at  | KLF7              | -0,978 | 3,205 |
| 204265_s_at  | GPSM3             | -0,98  | 4,668 |
| 208206_s_at  | RASGRP2           | -0,98  | 5,152 |
| 201037_at    | PFKP              | -0,981 | 2,781 |
| 239251_at    |                   | -0,981 | 3,781 |
| 213798_s_at  | CAP1              | -0,982 | 4,404 |
| 218832_x_at  | ARRB1             | -0,982 | 2,694 |
| 202727_s_at  | IFNGR1            | -0,983 | 2,972 |
| 208700_s_at  | TKT               | -0,983 | 3,236 |
| 210514_x_at  | HLA-G             | -0,983 | 3,048 |
| 222538_s_at  | APPL1             | -0,983 | 6,163 |
| 204334_at    | KLF7              | -0,984 | 4,677 |
| 201940_at    | CPD               | -0,985 | 2,53  |
| 207643_s_at  | TNFRSF1A          | -0,986 | 4,187 |
| 230921_s_at  | MAP3K12           | -0,986 | 4,165 |
| 1552677_a_at | DIP2A             | -0,987 | 2,512 |
| 212794_s_at  | KIAA1033          | -0,987 | 6,421 |
| 201538_s_at  | DUSP3             | -0,988 | 4,142 |
| 217992_s_at  | EFHD2             | -0,988 | 3,848 |
| 227113_at    | ADHFE1            | -0,988 | 5,085 |
| 239735_at    |                   | -0,988 | 2,239 |
| 244443_at    | LINC01578         | -0,988 | 2,533 |
| 226495_at    | MAVS              | -0,989 | 4,707 |
| 227039_at    | AKAP13            | -0,989 | 6,19  |
| 217534_at    | FAM49B            | -0,99  | 3,102 |
| 204499_at    | AGTPBP1           | -0,991 | 3,472 |
| 212098_at    | MGAT5             | -0,991 | 5,322 |
| 238299_at    |                   | -0,991 | 3,226 |
| 230872_s_at  | ARPC4-TTLL3///TTL | -0,992 | 4,753 |
| 206792_x_at  | LOC729966///PDE4  | -0,995 | 2,896 |

Tabelle1

|              |                   |        |        |
|--------------|-------------------|--------|--------|
| 226142_at    | GLIPR1            | -0,995 | 2,245  |
| 243981_at    | STK4              | -0,995 | 2,252  |
| 228479_at    | SOAT1             | -0,997 | 5,285  |
| 202670_at    | MAP2K1            | -0,999 | 3,003  |
| 213364_s_at  | SNX1              | -0,999 | 4,333  |
| 227135_at    | NAAA              | -0,999 | 2,295  |
| 225272_at    | SAT2              | -1,002 | 5,685  |
| 202157_s_at  | CELF2             | -1,003 | 15,178 |
| 212873_at    | ARHGAP45          | -1,004 | 3,435  |
| 241093_at    |                   | -1,006 | 2,385  |
| 212516_at    | ARAP1             | -1,007 | 3,926  |
| 235190_at    |                   | -1,008 | 2,455  |
| 215750_at    |                   | -1,009 | 3,059  |
| 218121_at    | HMOX2             | -1,01  | 4,485  |
| 219447_s_at  | SLC35C2           | -1,011 | 6,085  |
| 223562_at    | PARVG             | -1,012 | 5,085  |
| 202625_at    | LYN               | -1,013 | 3,091  |
| 227040_at    | NHLRC3            | -1,013 | 3,501  |
| 242794_at    | MAML3             | -1,013 | 4,597  |
| 203110_at    | PTK2B             | -1,014 | 6,607  |
| 206520_x_at  | SIGLEC6           | -1,014 | 4,461  |
| 227324_at    | COQ8B             | -1,014 | 6,052  |
| 224392_s_at  | OPN3              | -1,016 | 2,652  |
| 236539_at    | PTPN22            | -1,016 | 2,213  |
| 212326_at    | VPS13D            | -1,017 | 4,389  |
| 205594_at    | ZNF652            | -1,019 | 4,307  |
| 222024_s_at  | AKAP13            | -1,02  | 5,775  |
| 239393_at    |                   | -1,02  | 2,799  |
| 214765_s_at  | NAAA              | -1,021 | 2,517  |
| 224920_x_at  | MYADM             | -1,021 | 2,983  |
| 240154_at    |                   | -1,021 | 3,99   |
| 1562265_at   |                   | -1,022 | 3,157  |
| 211676_s_at  | IFNGR1            | -1,022 | 2,662  |
| 211529_x_at  | HLA-G             | -1,023 | 3,053  |
| 201642_at    | IFNGR2            | -1,024 | 2,507  |
| 212666_at    | SMURF1            | -1,024 | 3,276  |
| 223492_s_at  | LRRFIP1           | -1,024 | 5,77   |
| 239467_at    |                   | -1,024 | 3,474  |
| 210401_at    | P2RX1             | -1,026 | 3,651  |
| 224046_s_at  | PDE7A             | -1,026 | 3,146  |
| 234260_at    |                   | -1,027 | 2,315  |
| 243817_at    |                   | -1,027 | 3,433  |
| 1554168_a_at | SH3KBP1           | -1,028 | 4,846  |
| 1563781_at   | LOC101928623///LC | -1,028 | 5,654  |
| 227178_at    | CELF2             | -1,028 | 7,897  |
| 209539_at    | ARHGEF6           | -1,029 | 6,128  |
| 204527_at    | MYO5A             | -1,031 | 4,356  |
| 227060_at    | RELT              | -1,031 | 2,474  |
| 233017_x_at  |                   | -1,031 | 2,495  |
| 238079_at    | TPM3              | -1,032 | 2,548  |
| 207996_s_at  | LDLRAD4           | -1,033 | 2,2    |
| 1552274_at   | PXK               | -1,034 | 3,114  |
| 225093_at    | UTRN              | -1,034 | 6,783  |
| 210129_s_at  | ARPC4-TTL3///TTL  | -1,035 | 4,124  |
| 244286_at    |                   | -1,035 | 2,68   |
| 209417_s_at  | IFI35             | -1,037 | 2,468  |
| 211528_x_at  | HLA-G             | -1,037 | 3,657  |
| 207238_s_at  | PTPRC             | -1,039 | 3,995  |
| 237943_at    | TMCC1             | -1,039 | 3,191  |
| 216766_at    |                   | -1,042 | 2,855  |
| 236528_at    |                   | -1,042 | 3,267  |
| 1555781_at   | PQLC2             | -1,044 | 3,014  |
| 212120_at    | RHOQ              | -1,044 | 4,164  |

Tabelle1

|              |                   |        |        |
|--------------|-------------------|--------|--------|
| 209060_x_at  | NCOA3             | -1,045 | 6,313  |
| 225257_at    | CCDC97            | -1,045 | 6,416  |
| 227645_at    | PIK3R5            | -1,046 | 2,84   |
| 219957_at    | RUFY2             | -1,047 | 3,385  |
| 204789_at    | FMNL1             | -1,049 | 4,674  |
| 223696_at    | ARSD              | -1,049 | 4,132  |
| 216174_at    | HCRP1             | -1,05  | 3,096  |
| 226459_at    | PIK3AP1           | -1,05  | 2,974  |
| 212446_s_at  | CERS6             | -1,051 | 4,615  |
| 231878_at    | PAGR1             | -1,052 | 7,341  |
| 202659_at    | PSMB10            | -1,054 | 3,854  |
| 224998_at    | CMTM4             | -1,054 | 2,419  |
| 204049_s_at  | PHACTR2           | -1,055 | 3,111  |
| 204342_at    | SLC25A24          | -1,055 | 2,938  |
| 206369_s_at  | PIK3CG            | -1,055 | 3,581  |
| 239135_at    | CPPED1            | -1,055 | 2,5    |
| 207686_s_at  | CASP8             | -1,056 | 4,31   |
| 227131_at    | MAP3K3            | -1,056 | 2,428  |
| 232525_at    |                   | -1,056 | 3,138  |
| 238787_at    | DENND1B           | -1,057 | 3,816  |
| 201206_s_at  | RRBP1             | -1,058 | 3,326  |
| 220609_at    | LOC202181         | -1,058 | 3,71   |
| 211791_s_at  | KCNAB2            | -1,059 | 2,607  |
| 219316_s_at  | FLVCR2            | -1,059 | 2,26   |
| 201869_s_at  | TBL1X             | -1,06  | 2,748  |
| 221899_at    | N4BP2L2           | -1,06  | 4,039  |
| 229723_at    | TAGAP             | -1,062 | 2,586  |
| 203710_at    | ITPR1             | -1,063 | 3,581  |
| 238050_at    | ANTXR2            | -1,064 | 3,501  |
| 242558_at    |                   | -1,064 | 2,574  |
| 229287_at    | PCNX1             | -1,065 | 5,515  |
| 1569180_at   |                   | -1,066 | 2,629  |
| 212268_at    | SERPINB1          | -1,067 | 2,956  |
| 242423_x_at  |                   | -1,067 | 3,524  |
| 200859_x_at  | FLNA              | -1,068 | 3,918  |
| 206200_s_at  | ANXA11            | -1,068 | 6,131  |
| 219132_at    | PELI2             | -1,068 | 2,333  |
| 225832_s_at  | DAGLB             | -1,068 | 4,393  |
| 213017_at    | ABHD3             | -1,069 | 3,452  |
| 229597_s_at  | WDFY4             | -1,069 | 4,118  |
| 217733_s_at  | TMSB10            | -1,07  | 4,659  |
| 236462_at    |                   | -1,07  | 3,449  |
| 229334_at    | RUFY3             | -1,073 | 3,116  |
| 230000_at    | RNF213            | -1,075 | 3,181  |
| 235577_at    | ZNF652            | -1,076 | 6,378  |
| 1555812_a_at | ARHGDI8           | -1,079 | 7,172  |
| 226333_at    | IL6R              | -1,079 | 2,626  |
| 215043_s_at  | GUSBP3///SMA5///S | -1,081 | 2,453  |
| 233254_x_at  | PTEN              | -1,082 | 3,185  |
| 202720_at    | TES               | -1,083 | 2,277  |
| 218216_x_at  | ARL6IP4           | -1,083 | 8,266  |
| 225618_at    | ARHGAP27          | -1,083 | 4,342  |
| 201867_s_at  | TBL1X             | -1,084 | 2,241  |
| 201309_x_at  | NREP              | -1,085 | 2,219  |
| 227210_at    | SFMBT2            | -1,085 | 2,293  |
| 212063_at    | CD44              | -1,086 | 5,004  |
| 228738_at    | D2HGDH            | -1,086 | 3,988  |
| 211452_x_at  | LRRFIP1           | -1,087 | 10,307 |
| 213293_s_at  | TRIM22            | -1,087 | 5,382  |
| 221807_s_at  | TRABD             | -1,087 | 2,538  |
| 225825_at    | C20orf194         | -1,087 | 4,942  |
| 238429_at    | TMEM71            | -1,087 | 2,45   |
| 212906_at    | GRAMD1B           | -1,088 | 3,357  |

Tabelle1

|             |                    |        |       |
|-------------|--------------------|--------|-------|
| 223358_s_at | PDE7A              | -1,088 | 3,398 |
| 242080_at   |                    | -1,088 | 3,619 |
| 212974_at   | DENND3             | -1,089 | 6,2   |
| 213606_s_at | ARHGDI A           | -1,089 | 3,271 |
| 228159_at   | WDFY2              | -1,089 | 5,906 |
| 213280_at   | RAP1GAP2           | -1,09  | 2,988 |
| 230206_at   | DOCK5              | -1,09  | 3,022 |
| 211742_s_at | EVI2B              | -1,091 | 2,862 |
| 209124_at   | MYD88              | -1,093 | 4,617 |
| 237118_at   |                    | -1,094 | 3,877 |
| 210264_at   | GPR35              | -1,095 | 4,424 |
| 229307_at   | ANKRD28            | -1,096 | 2,239 |
| 228499_at   | PFKFB4             | -1,097 | 2,214 |
| 225919_s_at | C9orf72            | -1,099 | 2,538 |
| 227817_at   | PRKCB              | -1,099 | 5,678 |
| 1561167_at  |                    | -1,101 | 2,535 |
| 239379_at   |                    | -1,101 | 2,815 |
| 208657_s_at | SEPT9              | -1,104 | 2,726 |
| 212347_x_at | MIR4800///MXD4     | -1,104 | 2,498 |
| 238446_at   | NAIP               | -1,104 | 3,613 |
| 215415_s_at | LYST               | -1,105 | 2,661 |
| 1558365_at  | PGK1               | -1,107 | 4,641 |
| 209281_s_at | ATP2B1             | -1,11  | 2,918 |
| 1570197_at  |                    | -1,111 | 2,416 |
| 229028_s_at | ARL17B///ARL17A    | -1,115 | 3,302 |
| 213666_at   | SEPT6              | -1,116 | 2,829 |
| 218840_s_at | NADSYN1            | -1,117 | 3,539 |
| 228359_at   | UBASH3B            | -1,117 | 2,456 |
| 209040_s_at | PSMB8              | -1,121 | 4,912 |
| 238025_at   | MLKL               | -1,121 | 3,988 |
| 212321_at   | SGPL1              | -1,123 | 5,976 |
| 212660_at   | JADE2              | -1,123 | 4,812 |
| 221123_x_at | FBXO16///ZNF395    | -1,123 | 2,643 |
| 236545_at   |                    | -1,126 | 2,707 |
| 208072_s_at | DGKD               | -1,127 | 5,593 |
| 216109_at   | MED13L             | -1,128 | 3,498 |
| 217118_s_at | KIAA0930           | -1,128 | 3,274 |
| 209389_x_at | DBI                | -1,129 | 4,156 |
| 209970_x_at | CASP1              | -1,129 | 2,371 |
| 218396_at   | VPS13C             | -1,13  | 9,545 |
| 224983_at   | SCARB2             | -1,13  | 5,265 |
| 1569003_at  | VMP1               | -1,131 | 2,188 |
| 222692_s_at | LOC101928615///FN  | -1,131 | 2,484 |
| 1558877_at  |                    | -1,132 | 2,485 |
| 229670_at   |                    | -1,132 | 3,411 |
| 201954_at   | ARPC1B             | -1,133 | 4,131 |
| 226430_at   | RELL1              | -1,133 | 2,924 |
| 227228_s_at | CCDC88C            | -1,135 | 7,153 |
| 219173_at   | MYO15B             | -1,137 | 5,337 |
| 204489_s_at | CD44               | -1,138 | 3,181 |
| 205356_at   | USP13              | -1,139 | 4,596 |
| 214722_at   | NOTCH2NL           | -1,139 | 3,559 |
| 227947_at   | PHACTR2            | -1,139 | 2,991 |
| 236703_at   |                    | -1,139 | 4,81  |
| 243030_at   |                    | -1,139 | 3,202 |
| 203916_at   | NDST2              | -1,141 | 5,648 |
| 224923_at   | TTC7A              | -1,142 | 7,647 |
| 242167_at   |                    | -1,142 | 3,686 |
| 209310_s_at | CASP4              | -1,144 | 5,811 |
| 220038_at   | C8orf44-SGK3///SGI | -1,144 | 5,992 |
| 1565599_at  |                    | -1,145 | 3,057 |
| 243141_at   | SGMS2              | -1,145 | 2,738 |
| 222483_at   | EFHD2              | -1,146 | 3,313 |

Tabelle1

|              |                   |        |       |
|--------------|-------------------|--------|-------|
| 227802_at    | RUFY3             | -1,146 | 3,889 |
| 226875_at    | DOCK11            | -1,148 | 8,015 |
| 232843_s_at  | DOCK8             | -1,148 | 7,067 |
| 1559584_a_at | C16orf54          | -1,149 | 4,791 |
| 209083_at    | CORO1A            | -1,149 | 4,712 |
| 214354_x_at  | SFTP8             | -1,149 | 4,936 |
| 202180_s_at  | MVP               | -1,15  | 2,213 |
| 204785_x_at  | IFNAR2            | -1,151 | 6,472 |
| 201028_s_at  | CD99              | -1,154 | 2,875 |
| 202896_s_at  | SIRPA             | -1,154 | 2,374 |
| 242268_at    | CELF2             | -1,154 | 4,016 |
| 222317_at    | PDE3B             | -1,156 | 2,179 |
| 226039_at    | MGAT4A            | -1,156 | 2,464 |
| 240652_at    |                   | -1,156 | 2,183 |
| 204236_at    | FLI1              | -1,157 | 3,599 |
| 213295_at    | CYLD              | -1,158 | 6,159 |
| 1557905_s_at | CD44              | -1,16  | 3,101 |
| 201537_s_at  | DUSP3             | -1,16  | 3,616 |
| 202807_s_at  | TOM1              | -1,161 | 3,404 |
| 231769_at    | FBXO6             | -1,163 | 2,985 |
| 238013_at    | PLEKHA2           | -1,163 | 6,496 |
| 204183_s_at  | GRK3              | -1,165 | 5,589 |
| 1552275_s_at | PXK               | -1,167 | 3,968 |
| 229776_at    | SLCO3A1           | -1,168 | 4,515 |
| 230207_s_at  | DOCK5             | -1,168 | 3,457 |
| 232383_at    | TFEC              | -1,168 | 2,336 |
| 238883_at    |                   | -1,168 | 3,609 |
| 204490_s_at  | CD44              | -1,169 | 2,902 |
| 217599_s_at  | MDFIC             | -1,169 | 3,022 |
| 212975_at    | DENND3            | -1,17  | 5,821 |
| 225347_at    | ARL8A             | -1,17  | 4,774 |
| 226017_at    | CMTM7             | -1,17  | 7,318 |
| 1558517_s_at | LOC101927933///LF | -1,171 | 4,241 |
| 228812_at    | REL               | -1,173 | 4,987 |
| 242943_at    | ST8SIA4           | -1,174 | 2,655 |
| 218592_s_at  | CECR5             | -1,176 | 5,072 |
| 232307_at    |                   | -1,176 | 2,943 |
| 230263_s_at  | DOCK5             | -1,179 | 3,451 |
| 202565_s_at  | SVIL              | -1,18  | 3,884 |
| 222062_at    | IL27RA            | -1,181 | 3,182 |
| 209835_x_at  | CD44              | -1,184 | 3,311 |
| 225701_at    | AKNA              | -1,188 | 6,857 |
| 223047_at    | CMTM6             | -1,189 | 8,039 |
| 210872_x_at  | GAS7              | -1,191 | 3,601 |
| 213746_s_at  | FLNA              | -1,191 | 4,322 |
| 219807_x_at  | MIA-RAB4B///RAB4I | -1,194 | 2,189 |
| 204773_at    | IL11RA            | -1,195 | 4,296 |
| 238520_at    | TRERF1            | -1,195 | 3,479 |
| 227367_at    | SLCO3A1           | -1,197 | 4,81  |
| 231747_at    | CYSLTR1           | -1,197 | 3,944 |
| 232431_at    | NR3C1             | -1,2   | 3,701 |
| 201204_s_at  | RRBP1             | -1,201 | 5,709 |
| 203233_at    | IL4R              | -1,203 | 2,289 |
| 221879_at    | CALML4            | -1,204 | 2,487 |
| 205426_s_at  | HIP1              | -1,205 | 2,791 |
| 216944_s_at  | ITPR1             | -1,206 | 6,128 |
| 227013_at    | LATS2             | -1,206 | 3,547 |
| 201862_s_at  | LRRFIP1           | -1,207 | 12,27 |
| 204786_s_at  | IFNAR2            | -1,207 | 4,08  |
| 239328_at    | RCS1              | -1,207 | 3,832 |
| 225927_at    | MAP3K1            | -1,208 | 4,218 |
| 242903_at    | IFNGR1            | -1,208 | 2,635 |
| 211368_s_at  | CASP1             | -1,209 | 2,254 |

Tabelle1

|              |                   |        |        |
|--------------|-------------------|--------|--------|
| 226101_at    | PRKCE             | -1,209 | 3,134  |
| 230735_at    |                   | -1,209 | 4,625  |
| 239453_at    |                   | -1,209 | 3,949  |
| 203799_at    | LY75-CD302///CD3C | -1,21  | 2,293  |
| 221194_s_at  | TBC1D3P1-DHX40F   | -1,211 | 4,146  |
| 242008_at    |                   | -1,212 | 2,301  |
| 228726_at    | SERPINB1          | -1,214 | 4,429  |
| 225502_at    | DOCK8             | -1,215 | 7,44   |
| 239294_at    | PIK3CG            | -1,217 | 5,097  |
| 243797_at    | STK17B            | -1,217 | 2,23   |
| 227167_s_at  | RASSF3            | -1,219 | 3,826  |
| 205418_at    | FES               | -1,22  | 4,952  |
| 213817_at    | IRAK3             | -1,22  | 2,895  |
| 214085_x_at  | GLIPR1            | -1,22  | 3,26   |
| 207001_x_at  | TSC22D3           | -1,221 | 2,378  |
| 233207_at    | DISC1             | -1,221 | 3,53   |
| 239561_at    |                   | -1,221 | 5,09   |
| 211554_s_at  | APAF1             | -1,223 | 4,13   |
| 204061_at    | PRKX              | -1,224 | 7,781  |
| 238342_at    |                   | -1,224 | 2,521  |
| 224927_at    | PPP1R18           | -1,225 | 5,22   |
| 225673_at    | MYADM             | -1,23  | 4,409  |
| 242859_at    |                   | -1,23  | 3,316  |
| 216388_s_at  | LTB4R             | -1,232 | 2,605  |
| 219460_s_at  | TMEM127           | -1,232 | 5,263  |
| 230866_at    | CYSLTR1           | -1,232 | 3,657  |
| 214500_at    | H2AFY             | -1,233 | 2,908  |
| 240690_at    |                   | -1,233 | 2,238  |
| 226071_at    | ADAMTSL4          | -1,235 | 2,216  |
| 1567107_s_at | TPM4              | -1,236 | 3,083  |
| 224560_at    | TIMP2             | -1,236 | 3,698  |
| 209013_x_at  | TRIO              | -1,239 | 2,75   |
| 238534_at    | LRRFIP1           | -1,239 | 2,939  |
| 225763_at    | RCSD1             | -1,243 | 5,485  |
| 225009_at    | CMTM4             | -1,246 | 2,376  |
| 212587_s_at  | PTPRC             | -1,247 | 5,239  |
| 232686_at    | SIGLEC17P         | -1,249 | 2,511  |
| 227354_at    | PAG1              | -1,25  | 2,359  |
| 202156_s_at  | CELF2             | -1,255 | 17,443 |
| 209884_s_at  | SLC4A7            | -1,257 | 2,528  |
| 211391_s_at  | PATZ1             | -1,257 | 10,42  |
| 1553222_at   | OXER1             | -1,259 | 4,648  |
| 205367_at    | SH2B2             | -1,259 | 7,635  |
| 206600_s_at  | SLC16A5           | -1,259 | 7,462  |
| 206565_x_at  | SMA4              | -1,26  | 3,003  |
| 230836_at    | ST8SIA4           | -1,26  | 2,675  |
| 223276_at    | SMIM3             | -1,261 | 3,632  |
| 204204_at    | SLC31A2           | -1,262 | 2,711  |
| 223640_at    | HCST              | -1,262 | 4,666  |
| 209611_s_at  | SLC1A4            | -1,266 | 3,95   |
| 206707_x_at  | FAM65B            | -1,267 | 2,695  |
| 1569181_x_at |                   | -1,268 | 3,725  |
| 206011_at    | CASP1             | -1,268 | 2,55   |
| 204072_s_at  | FRY               | -1,27  | 2,34   |
| 211521_s_at  | CYTH4             | -1,271 | 3,218  |
| 222217_s_at  | SLC27A3           | -1,273 | 3,175  |
| 242784_at    |                   | -1,273 | 2,409  |
| 227761_at    | MYO5A             | -1,274 | 7,298  |
| 226641_at    | ANKRD44           | -1,276 | 5,098  |
| 227930_at    | AGO4              | -1,276 | 7,885  |
| 215375_x_at  | LRRFIP1           | -1,277 | 2,866  |
| 212014_x_at  | CD44              | -1,279 | 3,746  |
| 223380_s_at  | LATS2             | -1,281 | 4,699  |



Tabelle1

|              |                   |        |        |
|--------------|-------------------|--------|--------|
| 219259_at    | SEMA4A            | -1,284 | 2,245  |
| 1556389_at   | CNPY3             | -1,285 | 8,09   |
| 215392_at    |                   | -1,286 | 2,503  |
| 225231_at    | CBL               | -1,286 | 9,851  |
| 217549_at    | NCKAP1L           | -1,288 | 9,077  |
| 204046_at    | PLCB2             | -1,289 | 2,972  |
| 201943_s_at  | CPD               | -1,291 | 2,867  |
| 225626_at    | PAG1              | -1,291 | 2,461  |
| 213888_s_at  | TRAF3IP3          | -1,293 | 5,097  |
| 226671_at    | LAMP2             | -1,293 | 5,939  |
| 237441_at    |                   | -1,293 | 2,847  |
| 244464_at    |                   | -1,293 | 3,517  |
| 235740_at    | MCTP1             | -1,294 | 2,668  |
| 204806_x_at  | HLA-F             | -1,295 | 3,988  |
| 216147_at    |                   | -1,295 | 2,763  |
| 235199_at    | RNF125            | -1,296 | 4,32   |
| 228685_at    | IL17RA            | -1,297 | 2,442  |
| 228573_at    | ANTXR2            | -1,298 | 5,383  |
| 201251_at    | PKM               | -1,299 | 4,161  |
| 205312_at    | SPI1              | -1,3   | 3,314  |
| 221561_at    | SOAT1             | -1,301 | 3,641  |
| 208071_s_at  | LAIR1             | -1,302 | 5,753  |
| 228188_at    | FOSL2             | -1,302 | 2,446  |
| 229221_at    | CD44              | -1,302 | 2,655  |
| 215504_x_at  | ANKRD10-IT1       | -1,303 | 5,244  |
| 210916_s_at  | CD44              | -1,304 | 3,946  |
| 215716_s_at  | ATP2B1            | -1,304 | 2,809  |
| 211612_s_at  | IL13RA1           | -1,306 | 2,416  |
| 225883_at    | ATG16L2           | -1,306 | 5,448  |
| 212543_at    | AIM1              | -1,307 | 2,94   |
| 226249_at    | SNX30             | -1,307 | 6,232  |
| 203111_s_at  | PTK2B             | -1,308 | 4,442  |
| 203879_at    | PIK3CD            | -1,308 | 6,817  |
| 231252_at    | KANSL1L           | -1,309 | 4,683  |
| 1555824_a_at | PACS2             | -1,31  | 10,972 |
| 203300_x_at  | AP1S2             | -1,31  | 2,755  |
| 226267_at    | JDP2              | -1,31  | 3,923  |
| 232726_at    |                   | -1,31  | 3,432  |
| 229010_at    | CBL               | -1,311 | 5,344  |
| 204500_s_at  | AGTPBP1           | -1,315 | 3,386  |
| 214590_s_at  | UBE2D1            | -1,316 | 2,738  |
| 235076_at    | CALCOCO2          | -1,318 | 3,394  |
| 238063_at    | TMEM154           | -1,318 | 3,693  |
| 1555536_at   | ANTXR2            | -1,32  | 5,446  |
| 203749_s_at  | RARA              | -1,32  | 5,598  |
| 211799_x_at  | HLA-C             | -1,32  | 3,704  |
| 203167_at    | TIMP2             | -1,322 | 2,728  |
| 208178_x_at  | TRIO              | -1,323 | 3,36   |
| 225786_at    |                   | -1,323 | 3,815  |
| 240862_at    | RASGRP4           | -1,323 | 3,395  |
| 214746_s_at  | ZNF467            | -1,328 | 3,111  |
| 200982_s_at  | ANXA6             | -1,33  | 2,876  |
| 238840_at    | LRRFIP1           | -1,33  | 3,286  |
| 221840_at    | PTPRE             | -1,332 | 3,703  |
| 232266_x_at  | CDK13             | -1,332 | 4,79   |
| 203416_at    | CD53              | -1,334 | 8,292  |
| 228314_at    | LOC101927933///LF | -1,335 | 5,14   |
| 228343_at    | POU2F2            | -1,336 | 2,85   |
| 214030_at    | CRYBG3            | -1,337 | 2,642  |
| 228670_at    | TEP1              | -1,337 | 7,423  |
| 230276_at    | FAM49A            | -1,344 | 2,864  |
| 226169_at    | SBF2              | -1,345 | 3,741  |
| 229454_at    | BCLAF1            | -1,346 | 5,432  |

Tabelle1

|              |                   |        |       |
|--------------|-------------------|--------|-------|
| 1557811_a_at |                   | -1,35  | 5,31  |
| 209876_at    | GIT2              | -1,352 | 5,151 |
| 207700_s_at  | NCOA3             | -1,353 | 8,058 |
| 244654_at    | MYO1G             | -1,353 | 4,631 |
| 244023_at    | SYK               | -1,354 | 4,238 |
| 202428_x_at  | DBI               | -1,356 | 4,763 |
| 204639_at    | ADA               | -1,356 | 2,225 |
| 216511_s_at  | TCF7L2            | -1,356 | 3,496 |
| 207540_s_at  | SYK               | -1,357 | 4,778 |
| 202080_s_at  | TRAK1             | -1,36  | 8,255 |
| 211764_s_at  | UBE2D1            | -1,364 | 3,789 |
| 230264_s_at  | AP1S2             | -1,364 | 2,899 |
| 241268_x_at  |                   | -1,365 | 5,128 |
| 225524_at    | ANTXR2            | -1,366 | 6,453 |
| 202934_at    | HK2               | -1,367 | 5,088 |
| 203063_at    | PPM1F             | -1,367 | 4,722 |
| 219014_at    | PLAC8             | -1,368 | 4,366 |
| 223533_at    | LOC101927933///LF | -1,368 | 3,215 |
| 210644_s_at  | LAIR1             | -1,37  | 6,617 |
| 241891_at    |                   | -1,37  | 5,017 |
| 200696_s_at  | GSN               | -1,371 | 3,146 |
| 224990_at    | SMIM14            | -1,372 | 2,299 |
| 232617_at    | CTSS              | -1,373 | 2,227 |
| 203728_at    | BAK1              | -1,375 | 5,339 |
| 243824_at    | LINC01410         | -1,376 | 2,215 |
| 205462_s_at  | HPCAL1            | -1,377 | 6,508 |
| 211100_x_at  | LILRA2            | -1,382 | 2,409 |
| 235281_x_at  | AHNAK             | -1,384 | 2,476 |
| 204336_s_at  | RGS19             | -1,386 | 4,939 |
| 220023_at    | APOBR             | -1,386 | 3,395 |
| 226080_at    | SSH2              | -1,386 | 7,272 |
| 243469_at    |                   | -1,386 | 3,072 |
| 206034_at    | SERPINB8          | -1,388 | 2,495 |
| 228700_at    | CXorf38           | -1,389 | 5,438 |
| 226576_at    | ARHGAP26          | -1,39  | 4,006 |
| 225129_at    | CPNE2             | -1,395 | 3,143 |
| 230970_at    |                   | -1,396 | 4,602 |
| 225286_at    | ARSD              | -1,397 | 3,722 |
| 204774_at    | EVI2A             | -1,398 | 2,848 |
| 231579_s_at  | TIMP2             | -1,398 | 5,197 |
| 204222_s_at  | GLIPR1            | -1,403 | 2,969 |
| 219452_at    | DPEP2             | -1,403 | 3,629 |
| 218231_at    | NAGK              | -1,406 | 3,251 |
| 1552398_a_at | CLEC12A           | -1,414 | 2,547 |
| 201536_at    | DUSP3             | -1,419 | 5,879 |
| 211352_s_at  | NCOA3             | -1,42  | 6,201 |
| 214438_at    | HLX               | -1,421 | 3,341 |
| 226136_at    | GLIPR1            | -1,424 | 3,616 |
| 229389_at    | ATG16L2           | -1,424 | 5,282 |
| 235085_at    | SGK223            | -1,424 | 2,75  |
| 211070_x_at  | DBI               | -1,426 | 4,84  |
| 242471_at    |                   | -1,432 | 2,671 |
| 214405_at    |                   | -1,435 | 5,477 |
| 50221_at     | TFEB              | -1,435 | 2,703 |
| 225001_at    | RAB3D             | -1,437 | 4,241 |
| 227726_at    | RNF166            | -1,437 | 6,57  |
| 212561_at    | DENND5A           | -1,443 | 9,343 |
| 209880_s_at  | SELPLG            | -1,447 | 2,956 |
| 244696_at    |                   | -1,447 | 2,945 |
| 221666_s_at  | PYCARD            | -1,45  | 4,976 |
| 205945_at    | IL6R              | -1,456 | 3,752 |
| 208816_x_at  | ANXA2P2           | -1,456 | 3,503 |
| 209685_s_at  | PRKCB             | -1,456 | 7,925 |

Tabelle1

|              |                   |        |        |
|--------------|-------------------|--------|--------|
| 236435_at    |                   | -1,459 | 4,732  |
| 1558147_a_at | BAIAP2-AS1        | -1,466 | 3,569  |
| 213733_at    | MYO1F             | -1,466 | 4,583  |
| 217523_at    | CD44              | -1,466 | 3,169  |
| 202897_at    | SIRPA             | -1,469 | 2,472  |
| 225579_at    | PQLC3             | -1,473 | 4,552  |
| 230466_s_at  | RASSF3            | -1,478 | 4,427  |
| 1559882_at   | SAMHD1            | -1,481 | 2,731  |
| 202855_s_at  | MIR6787///SLC16A3 | -1,481 | 2,622  |
| 209203_s_at  | BICD2             | -1,482 | 6,529  |
| 236395_at    |                   | -1,483 | 3,498  |
| 205707_at    | IL17RA            | -1,487 | 3,379  |
| 203185_at    | RASSF2            | -1,49  | 5,633  |
| 225869_s_at  | UNC93B1           | -1,491 | 2,917  |
| 204352_at    | TRAF5             | -1,494 | 2,67   |
| 224884_at    | AKAP13            | -1,495 | 9,889  |
| 202910_s_at  | ADGRE5            | -1,496 | 4,384  |
| 238356_at    | DOCK11            | -1,5   | 9,436  |
| 225214_at    | LOC100129034      | -1,502 | 4,434  |
| 243514_at    | WDFY2             | -1,505 | 5,531  |
| 219457_s_at  | RIN3              | -1,509 | 4,893  |
| 242916_at    | CNTRL             | -1,513 | 6,607  |
| 227490_at    | WDFY2             | -1,516 | 14,308 |
| 237018_at    |                   | -1,523 | 4,687  |
| 218223_s_at  | PLEKHO1           | -1,524 | 5,66   |
| 224909_s_at  | PREX1             | -1,524 | 7,487  |
| 226219_at    | ARHGAP30          | -1,524 | 10,105 |
| 233867_at    |                   | -1,525 | 3,423  |
| 209683_at    | FAM49A            | -1,527 | 3      |
| 204221_x_at  | GLIPR1            | -1,528 | 2,949  |
| 204646_at    | DPYD              | -1,531 | 2,3    |
| 202902_s_at  | CTSS              | -1,534 | 2,23   |
| 204088_at    | P2RX4             | -1,534 | 7,929  |
| 227391_x_at  | LRRFIP1           | -1,535 | 12,709 |
| 229295_at    | IL17RA            | -1,54  | 2,345  |
| 214753_at    | N4BP2L2           | -1,543 | 5,698  |
| 217610_at    | SPDYE2            | -1,558 | 6,006  |
| 202545_at    | PRKCD             | -1,56  | 2,972  |
| 216705_s_at  | ADA               | -1,56  | 2,414  |
| 238909_at    | S100A10           | -1,565 | 2,197  |
| 224989_at    | SMIM14            | -1,566 | 2,813  |
| 206219_s_at  | VAV1              | -1,573 | 12,118 |
| 233358_at    |                   | -1,573 | 8,233  |
| 238462_at    | UBASH3B           | -1,575 | 3,025  |
| 90265_at     | ADAP1             | -1,575 | 4,887  |
| 215235_at    | SPTAN1            | -1,576 | 8,238  |
| 202192_s_at  | GAS7              | -1,577 | 6,495  |
| 220326_s_at  | ARHGEF40          | -1,582 | 3,928  |
| 209829_at    | FAM65B            | -1,587 | 3,046  |
| 1567628_at   | CD74              | -1,598 | 2,229  |
| 202191_s_at  | GAS7              | -1,601 | 4,466  |
| 221565_s_at  | CALHM2            | -1,621 | 3,393  |
| 216015_s_at  | NLRP3             | -1,626 | 2,398  |
| 224925_at    | PREX1             | -1,626 | 9,543  |
| 1565868_at   | CD44              | -1,627 | 3,966  |
| 218854_at    | DSE               | -1,631 | 2,92   |
| 216056_at    | CD44              | -1,632 | 4,626  |
| 1553906_s_at | FGD2              | -1,637 | 2,822  |
| 57715_at     | CALHM2            | -1,638 | 5,144  |
| 204982_at    | GIT2              | -1,64  | 14,952 |
| 223058_at    | FAM107B           | -1,646 | 3,781  |
| 205227_at    | IL1RAP            | -1,65  | 2,623  |
| 207857_at    | LILRA2            | -1,664 | 2,378  |

Tabelle1

|              |                   |        |        |
|--------------|-------------------|--------|--------|
| 232034_at    | LINC00537         | -1,672 | 4,277  |
| 227799_at    | MYO1G             | -1,683 | 4,811  |
| 211675_s_at  | MDFIC             | -1,689 | 2,718  |
| 207957_s_at  | PRKCB             | -1,691 | 8,397  |
| 208018_s_at  | HCK               | -1,693 | 2,845  |
| 1552691_at   | ARL11             | -1,701 | 5,516  |
| 242946_at    | CD53              | -1,704 | 6,501  |
| 204220_at    | GMFG              | -1,709 | 10,101 |
| 208614_s_at  | FLNB              | -1,709 | 2,991  |
| 213394_at    | MAPKBP1           | -1,714 | 3,97   |
| 229373_at    |                   | -1,737 | 4,148  |
| 1552302_at   | TMEM106A          | -1,738 | 5,113  |
| 203104_at    | CSF1R             | -1,743 | 2,783  |
| 207610_s_at  | ADGRE2            | -1,746 | 4,769  |
| 240665_at    |                   | -1,75  | 6,606  |
| 204858_s_at  | TYMP              | -1,751 | 2,334  |
| 227198_at    | AFF3              | -1,755 | 2,708  |
| 200660_at    | S100A11           | -1,759 | 2,183  |
| 207704_s_at  | GAS7              | -1,764 | 4,228  |
| 228795_at    | PRKCB             | -1,766 | 10,102 |
| 219279_at    | DOCK10            | -1,768 | 3,286  |
| 228325_at    | SPIDR             | -1,77  | 2,607  |
| 233385_x_at  | MIA-RAB4B///RAB4  | -1,778 | 7,811  |
| 202901_x_at  | CTSS              | -1,786 | 3,464  |
| 1559034_at   | SIRPB2            | -1,791 | 3,313  |
| 201590_x_at  | ANXA2             | -1,796 | 2,82   |
| 201887_at    | IL13RA1           | -1,813 | 3,187  |
| 210427_x_at  | ANXA2             | -1,816 | 2,913  |
| 227052_at    | SMIM14            | -1,826 | 3,157  |
| 210840_s_at  | IQGAP1            | -1,847 | 6,616  |
| 235798_at    | TMEM170B          | -1,854 | 3,599  |
| 223059_s_at  | FAM107B           | -1,857 | 5,1    |
| 225372_at    | C10orf54          | -1,897 | 2,355  |
| 213503_x_at  | ANXA2             | -1,9   | 2,906  |
| 204860_s_at  | NAIP              | -1,905 | 4,958  |
| 201105_at    | LGALS1            | -1,912 | 2,45   |
| 206380_s_at  | CFP               | -1,921 | 2,558  |
| 201850_at    | CAPG              | -1,948 | 2,844  |
| 214511_x_at  | FCGR1B            | -1,955 | 2,639  |
| 224374_s_at  | EMILIN2           | -1,967 | 5,728  |
| 219505_at    | CECR1             | -1,97  | 2,725  |
| 211101_x_at  | LILRA2            | -1,975 | 3,287  |
| 206206_at    | CD180             | -1,985 | 2,837  |
| 202812_at    | GAA               | -2,009 | 4,727  |
| 202820_at    | AHR               | -2,023 | 2,963  |
| 235529_x_at  | SAMHD1            | -2,025 | 2,693  |
| 235964_x_at  | SAMHD1            | -2,035 | 2,286  |
| 58780_s_at   | ARHGEF40          | -2,051 | 5,687  |
| 200791_s_at  | IQGAP1            | -2,069 | 6,432  |
| 211067_s_at  | GAS7              | -2,079 | 6,152  |
| 221718_s_at  | AKAP13            | -2,086 | 6,806  |
| 1559883_s_at | SAMHD1            | -2,145 | 3,44   |
| 213446_s_at  | IQGAP1            | -2,164 | 5,981  |
| 212998_x_at  | LOC101060835///HL | -2,226 | 2,278  |
| 204502_at    | SAMHD1            | -2,237 | 2,871  |
| 211986_at    | AHNAK             | -2,301 | 7,909  |
| 203853_s_at  | GAB2              | -2,312 | 10,739 |
| 205081_at    | CRIP1             | -2,459 | 3,242  |
| 226879_at    | HVCN1             | -2,553 | 5,468  |
| 234987_at    | SAMHD1            | -2,576 | 3,444  |
| 200762_at    | DPYSL2            | -2,708 | 4,188  |

**Table S6: Comparative expression profiling analysis of MEPs versus granulopoiesis (GSE42519)**

| ID           | Gene.symbol   | Gene.title                                                                          | log2(fold change)(MEP vs differentiated) | -log10(Pvalue)(MEP vs differentiated) |
|--------------|---------------|-------------------------------------------------------------------------------------|------------------------------------------|---------------------------------------|
| 1431_at      | CYP2E1        | cytochrome P450 family 2 subfamily E member 1                                       | 2,665                                    | 11,314                                |
| 1552256_a_at | SCARB1        | scavenger receptor class B member 1                                                 | 1,108                                    | 2,573                                 |
| 1552257_a_at | TTL12         | tubulin tyrosine ligase like 12                                                     | 1,589                                    | 2,929                                 |
| 1552263_at   | MAPK1         | mitogen-activated protein kinase 1                                                  | -2,862                                   | 4,179                                 |
| 1552266_at   | ADAM32        | ADAM metallopeptidase domain 32                                                     | 1,981                                    | 4,603                                 |
| 1552274_at   | PXK           | PX domain containing serine/threonine kinase like                                   | -2,85                                    | 6,222                                 |
| 1552275_s_at | PXK           | PX domain containing serine/threonine kinase like                                   | -1,83                                    | 3,549                                 |
| 1552334_at   | TRIOBP        | TRIO and F-actin binding protein                                                    | -2,15                                    | 2,711                                 |
| 1552360_a_at | TIRAP         | TIR domain containing adaptor protein                                               | -2,252                                   | 3,166                                 |
| 1552386_at   | GAPT          | GRB2-binding adaptor protein, transmembrane                                         | -4,905                                   | 6,946                                 |
| 1552398_a_at | CLEC12A       | C-type lectin domain family 12 member A                                             | -5,212                                   | 5,676                                 |
| 1552399_a_at | BRF1          | BRF1, RNA polymerase III transcription initiation factor 90 kDa subunit             | 1,724                                    | 2,442                                 |
| 1552486_s_at | LACTB         | lactamase beta                                                                      | -1,62                                    | 3,304                                 |
| 1552491_at   | IDI2          | isopentenyl-diphosphate delta isomerase 2                                           | 1,053                                    | 2,822                                 |
| 1552543_a_at | STON2         | stonin 2                                                                            | 2,723                                    | 8,33                                  |
| 1552546_a_at | LETM2         | leucine zipper and EF-hand containing transmembrane protein 2                       | -2,272                                   | 3,778                                 |
| 1552553_a_at | NLR4          | NLR family CARD domain containing 4                                                 | -4,52                                    | 3,097                                 |
| 1552563_a_at |               |                                                                                     | 2,475                                    | 5,067                                 |
| 1552572_a_at | MIPOL1        | mirror-image polydactyly 1                                                          | 1,619                                    | 5,707                                 |
| 1552573_s_at | MIPOL1        | mirror-image polydactyly 1                                                          | 0,617                                    | 2,762                                 |
| 1552607_at   | FAM223A//FAM2 | family with sequence similarity 223 member A (non-protein coding)//family with seq  | -2,288                                   | 3,08                                  |
| 1552627_a_at | ARHGAP5       | Rho GTPase activating protein 5                                                     | 1,951                                    | 2,771                                 |
| 1552632_a_at | ARSG          | arylsulfatase G                                                                     | -3,413                                   | 3,677                                 |
| 1552634_a_at | ZNF101        | zinc finger protein 101                                                             | -0,864                                   | 2,501                                 |
| 1552652_at   | HPS4          | HPS4, biogenesis of lysosomal organelles complex 3 subunit 2                        | 1,681                                    | 2,915                                 |
| 1552671_a_at | SLC9A7        | solute carrier family 9 member A7                                                   | 1,912                                    | 5,707                                 |
| 1552691_at   | ARL11         | ADP ribosylation factor like GTPase 11                                              | -4,097                                   | 5,878                                 |
| 1552693_at   | ARL11         | ADP ribosylation factor like GTPase 11                                              | -2,681                                   | 2,915                                 |
| 1552755_at   | C9orf66       | chromosome 9 open reading frame 66                                                  | -2,111                                   | 5,23                                  |
| 1552769_at   | ZNF625        | zinc finger protein 625                                                             | 0,938                                    | 2,761                                 |
| 1552772_at   | CLEC4D        | C-type lectin domain family 4 member D                                              | -6,421                                   | 3,647                                 |
| 1552773_at   | CLEC4D        | C-type lectin domain family 4 member D                                              | -5,913                                   | 3,492                                 |
| 1552774_a_at | SLC25A27      | solute carrier family 25 member 27                                                  | 1,007                                    | 2,523                                 |
| 1552798_a_at | TLR4          | toll like receptor 4                                                                | -3,969                                   | 4,33                                  |
| 1552845_at   | CLDN15        | claudin 15                                                                          | -0,807                                   | 3                                     |
| 1552849_at   | M1AP          | meiosis 1 associated protein                                                        | -2,723                                   | 2,659                                 |
| 1552908_at   | GCSAML        | germinal center associated signaling and motility like                              | 1,928                                    | 7,791                                 |
| 1552923_a_at | PITPNM2       | phosphatidylinositol transfer protein membrane associated 2                         | 0,963                                    | 3,074                                 |
| 1552977_a_at | CNPY3         | canopy FGF signaling regulator 3                                                    | -2,224                                   | 4,357                                 |
| 1553043_a_at | CD300LF       | CD300 molecule like family member f                                                 | -4,975                                   | 10,338                                |
| 1553083_at   |               |                                                                                     | -1,221                                   | 2,449                                 |
| 1553099_at   | TIGD1         | tigger transposable element derived 1                                               | 1,508                                    | 3,058                                 |
| 1553105_s_at | DSG2          | desmoglein 2                                                                        | 1,945                                    | 2,989                                 |
| 1553132_a_at | TC2N          | tandem C2 domains, nuclear                                                          | 1,539                                    | 4,112                                 |
| 1553137_s_at | KLF11         | Kruppel like factor 11                                                              | 1,513                                    | 3,741                                 |
| 1553150_at   | KDM1B         | lysine demethylase 1B                                                               | -1,959                                   | 3,871                                 |
| 1553202_at   | STOX1         | storkhead box 1                                                                     | 0,716                                    | 2,55                                  |
| 1553214_a_at | CCDC7         | coiled-coil domain containing 7                                                     | -2,14                                    | 3,426                                 |
| 1553215_s_at | CCDC7         | coiled-coil domain containing 7                                                     | -1,048                                   | 3,159                                 |
| 1553219_a_at | AMMECR1       | Alport syndrome, mental retardation, midface hypoplasia and elliptocytosis chromosc | 1,995                                    | 3,362                                 |
| 1553272_at   | SLC36A1       | solute carrier family 36 member 1                                                   | -1,742                                   | 2,755                                 |
| 1553297_a_at | CSF3R         | colony stimulating factor 3 receptor                                                | -4,573                                   | 4,25                                  |
| 1553380_at   | PARP15        | poly(ADP-ribose) polymerase family member 15                                        | 2,692                                    | 2,926                                 |
| 1553430_a_at | EDARADD       | EDAR associated death domain                                                        | 1,074                                    | 3,886                                 |
| 1553435_at   | C18orf15      | chromosome 18 open reading frame 15                                                 | 0,894                                    | 3,646                                 |
| 1553459_at   | CCDC150       | coiled-coil domain containing 150                                                   | 0,943                                    | 3,42                                  |
| 1553536_at   | MBNL2         | muscleblind like splicing regulator 2                                               | 1,974                                    | 2,674                                 |
| 1553546_at   |               |                                                                                     | 3,168                                    | 8,462                                 |
| 1553715_s_at | MCRIP2        | MAPK regulated corepressor interacting protein 2                                    | 0,818                                    | 2,618                                 |
| 1553726_s_at | TBC1D32       | TBC1 domain family member 32                                                        | 1,431                                    | 3,545                                 |
| 1553734_at   | AK7           | adenylate kinase 7                                                                  | 2,176                                    | 8,616                                 |
| 1553747_at   | MGC16025      | uncharacterized LOC85009                                                            | -1,583                                   | 2,952                                 |
| 1553801_a_at | DTD2          | D-tyrosyl-tRNA deacylase 2 (putative)                                               | 2,621                                    | 2,526                                 |
| 1553834_at   | COL6A5        | collagen type VI alpha 5 chain                                                      | 1,304                                    | 4,951                                 |
| 1553835_a_at | COL6A5        | collagen type VI alpha 5 chain                                                      | 1,762                                    | 6,341                                 |
| 1553849_at   | CCDC26        | CCDC26 long non-coding RNA                                                          | 4,005                                    | 2,827                                 |
| 1553955_at   | PPP1R21       | protein phosphatase 1 regulatory subunit 21                                         | -1,579                                   | 4,302                                 |
| 1554057_at   | ASH1L-AS1     | ASH1L antisense RNA 1                                                               | 1,855                                    | 3,74                                  |
| 1554062_at   | XG            | Xg blood group                                                                      | 1,366                                    | 3,962                                 |
| 1554084_a_at | NOL9          | nucleolar protein 9                                                                 | 1,014                                    | 4,805                                 |
| 1554091_a_at | TIRAP         | TIR domain containing adaptor protein                                               | -2,168                                   | 3,127                                 |
| 1554099_a_at | SPIN3         | spindlin family member 3                                                            | 0,572                                    | 2,525                                 |
| 1554101_a_at | TMTC4         | transmembrane and tetratricopeptide repeat containing 4                             | 2,419                                    | 4,106                                 |
| 1554102_a_at | TMTC4         | transmembrane and tetratricopeptide repeat containing 4                             | 1,559                                    | 3,547                                 |
| 1554112_a_at | ULK2          | unc-51 like autophagy activating kinase 2                                           | 1,061                                    | 3,418                                 |
| 1554132_a_at | CCSER2        | coiled-coil serine rich protein 2                                                   | -2,324                                   | 5,792                                 |
| 1554145_a_at | PPP1R21       | protein phosphatase 1 regulatory subunit 21                                         | -1,252                                   | 2,687                                 |
| 1554161_at   | SLC25A27      | solute carrier family 25 member 27                                                  | 1,214                                    | 5,472                                 |
| 1554168_a_at | SH3KBP1       | SH3 domain containing kinase binding protein 1                                      | -2,105                                   | 5,826                                 |
| 1554217_a_at | VP50          | VP50, EARP/GARPII complex subunit                                                   | 1,988                                    | 2,461                                 |
| 1554240_a_at | ITGAL         | integrin subunit alpha L                                                            | -4,792                                   | 4,726                                 |
| 1554242_a_at | COCH          | cochlin                                                                             | 2,62                                     | 3,526                                 |
| 1554300_a_at | SVOP          | SVOP like                                                                           | 1,502                                    | 3,616                                 |
| 1554316_at   | PGLS          | 6-phosphogluconolactonase                                                           | -1,368                                   | 2,616                                 |
| 1554334_a_at | DNAJA4        | DnaJ heat shock protein family (Hsp40) member A4                                    | 2,693                                    | 2,722                                 |
| 1554345_a_at | GIN1          | gypsy retrotransposon integrase 1                                                   | -1,087                                   | 2,77                                  |
| 1554385_a_at | PADI2         | peptidyl arginine deiminase 2                                                       | -4,68                                    | 3,541                                 |
| 1554390_s_at | ACTR2         | ARP2 actin related protein 2 homolog                                                | -0,971                                   | 2,641                                 |
| 1554423_a_at | FBXO7         | F-box protein 7                                                                     | 2,516                                    | 3,909                                 |
| 1554445_at   | ZNF85         | zinc finger protein 85                                                              | 2,333                                    | 2,503                                 |
| 1554493_s_at | THADA         | THADA, armadillo repeat containing                                                  | 0,915                                    | 2,543                                 |
| 1554503_a_at | OSCAR         | osteoclast associated, immunoglobulin-like receptor                                 | -4,662                                   | 3,604                                 |
| 1554508_at   | PIK3AP1       | phosphoinositide-3-kinase adaptor protein 1                                         | -2,972                                   | 3,967                                 |
| 1554536_at   | DPYD          | dihydropyrimidine dehydrogenase                                                     | -2,536                                   | 2,832                                 |
| 1554540_at   | DNAH14        | dynein axonemal heavy chain 14                                                      | 1,501                                    | 2,783                                 |
| 1554569_a_at | CELF2         | CUGBP, Elav-like family member 2                                                    | -3,24                                    | 4,498                                 |
| 1554580_a_at | WWP2          | VW domain containing E3 ubiquitin protein ligase 2                                  | 2,446                                    | 8,861                                 |
| 1554600_s_at | LMNA          | lamin A/C                                                                           | 1,929                                    | 4,698                                 |
| 1554608_at   | TGOLN2        | trans-golgi network protein 2                                                       | -2,492                                   | 2,748                                 |
| 1554618_at   | AGFG2         | ArfGAP with FG repeats 2                                                            | 2,211                                    | 5,732                                 |

|              |                 |                                                                                   |        |        |
|--------------|-----------------|-----------------------------------------------------------------------------------|--------|--------|
| 1554624_a_at | SIRPB1          | signal regulatory protein beta 1                                                  | -6,694 | 5,345  |
| 1554638_at   | ZFYVE16         | zinc finger FYVE-type containing 16                                               | -2,694 | 2,881  |
| 1554652_s_at | MAST4           | microtubule associated serine/threonine kinase family member 4                    | 0,962  | 4,209  |
| 1554717_a_at | PDE4D           | phosphodiesterase 4D                                                              | -2,78  | 2,564  |
| 1554730_at   | MCTP1           | multiple C2 and transmembrane domain containing 1                                 | -2,708 | 4,171  |
| 1554774_at   | MINA            | MYC induced nuclear antigen                                                       | 2,492  | 2,663  |
| 1554806_a_at | FBXO8           | F-box protein 8                                                                   | -1,508 | 3,045  |
| 1554830_a_at | STEAP3          | STEAP3 metalloreductase                                                           | 2,808  | 2,561  |
| 1554836_at   | USP36           | ubiquitin specific peptidase 36                                                   | 1,089  | 2,675  |
| 1554887_at   | LOC101927746    | uncharacterized LOC101927746                                                      | 1,354  | 7,588  |
| 1554899_s_at | FCER1G          | Fc fragment of IgE receptor Ig                                                    | -6,864 | 6,979  |
| 1554918_a_at | ABCC4           | ATP binding cassette subfamily C member 4                                         | 3,626  | 4,246  |
| 1554964_x_at |                 |                                                                                   | 0,578  | 3,109  |
| 1554965_at   | FILIP1L         | filamin A interacting protein 1 like                                              | 2,098  | 2,844  |
| 1555011_at   | ZFYVE16         | zinc finger FYVE-type containing 16                                               | -2,237 | 2,489  |
| 1555039_a_at | ABCC4           | ATP binding cassette subfamily C member 4                                         | 4,49   | 3,119  |
| 1555112_a_at | CCDC181         | coiled-coil domain containing 181                                                 | 1,62   | 3,596  |
| 1555123_at   | ST6GAL2         | ST6 beta-galactoside alpha-2,6-sialyltransferase 2                                | 2,446  | 6,421  |
| 1555145_at   | CCSAP           | centriole, cilia and spindle associated protein                                   | -1,792 | 3,189  |
| 1555157_at   |                 |                                                                                   | 2,643  | 6,332  |
| 1555199_at   | GOSR1           | golgi SNAP receptor complex member 1                                              | 1,425  | 2,541  |
| 1555203_s_at | SLC44A4         | solute carrier family 44 member 4                                                 | 1,752  | 4,929  |
| 1555220_a_at | AKR1E2          | aldo-keto reductase family 1 member E2                                            | 2,493  | 3,971  |
| 1555326_a_at | ADAM9           | ADAM metallopeptidase domain 9                                                    | -2,173 | 3,044  |
| 1555349_a_at | ITGB2           | integrin subunit beta 2                                                           | -4,804 | 4,138  |
| 1555397_at   | MYO1D           | myosin ID                                                                         | 1,412  | 4,61   |
| 1555420_a_at | KLF7            | Kruppel like factor 7                                                             | -3,171 | 3,936  |
| 1555488_at   |                 |                                                                                   | 1,479  | 2,998  |
| 1555500_s_at | SLC2A4RG        | SLC2A4 regulator                                                                  | 2,742  | 6,553  |
| 1555513_at   | PIAS2           | protein inhibitor of activated STAT 2                                             | 0,643  | 3,017  |
| 1555536_at   | ANTXR2          | anthrax toxin receptor 2                                                          | -4,062 | 6,52   |
| 1555547_at   |                 |                                                                                   | 2,649  | 9,356  |
| 1555590_a_at | GATA1           | GATA binding protein 1                                                            | 2,807  | 6,232  |
| 1555598_a_at | DUSP19          | dual specificity phosphatase 19                                                   | 1,557  | 3,827  |
| 1555600_s_at | APOL4           | apolipoprotein L4                                                                 | 2,248  | 7,68   |
| 1555606_a_at | GDPD1           | glycerophosphodiester phosphodiesterase domain containing 1                       | 3,315  | 8,592  |
| 1555608_at   | CAPRN2          | caprin family member 2                                                            | 2,619  | 8,029  |
| 1555614_at   | SUGT1P1         | SGT1 homolog, MIS12 kinetochore complex assembly cochaperone pseudogene 1         | 1,368  | 2,632  |
| 1555666_at   | PTPRS           | protein tyrosine phosphatase, receptor type S                                     | -0,715 | 3,115  |
| 1555707_at   | TNAP            | TRAFs and NIK-associated protein                                                  | 0,804  | 2,711  |
| 1555716_a_at | CXADR           | coxsackie virus and adenovirus receptor                                           | 2,062  | 6,572  |
| 1555736_a_at | AGTRAP          | angiotensin II receptor associated protein                                        | -1,77  | 3,986  |
| 1555745_a_at | LYZ             | lysozyme                                                                          | -4,885 | 10,394 |
| 1555754_s_at | ATN1            | atrophin 1                                                                        | 1,213  | 3,783  |
| 1555757_at   | C7orf34         | chromosome 7 open reading frame 34                                                | 0,911  | 2,625  |
| 1555775_a_at | ZAR1            | zygote arrest 1                                                                   | 1,533  | 4,539  |
| 1555781_at   | PQLC2           | PQ loop repeat containing 2                                                       | -0,972 | 2,521  |
| 1555783_x_at | PQLC2           | PQ loop repeat containing 2                                                       | -0,943 | 2,79   |
| 1555797_a_at | ARPC5           | actin related protein 2/3 complex subunit 5                                       | -2,506 | 4,104  |
| 1555812_a_at | ARHGDI8         | Rho GDP dissociation inhibitor beta                                               | -1,894 | 6,973  |
| 1555827_at   | CCNL1           | cyclin L1                                                                         | -1,804 | 2,587  |
| 1555843_at   | HNRNPM          | heterogeneous nuclear ribonucleoprotein M                                         | -1,91  | 2,589  |
| 1555852_at   | PSMB8-AS1       | PSMB8 antisense RNA 1 (head to head)                                              | -2,666 | 5,562  |
| 1555882_at   | SPIN3           | spindlin family member 3                                                          | 3,073  | 2,608  |
| 1555883_s_at | SPIN3           | spindlin family member 3                                                          | 2,177  | 3,33   |
| 1555943_at   | PGAM5           | PGAM family member 5, mitochondrial serine/threonine protein phosphatase          | 2,118  | 3,436  |
| 1555964_at   | ARL17B///ARL17A | ADP ribosylation factor like GTPase 17B///ADP ribosylation factor like GTPase 17A | -1,5   | 2,482  |
| 1555982_at   | ZFYVE16         | zinc finger FYVE-type containing 16                                               | -2,442 | 3,121  |
| 1556038_at   | GPR173          | G protein-coupled receptor 173                                                    | -0,731 | 3,221  |
| 1556047_s_at | MAGEE1          | MAGE family member E1                                                             | 1,923  | 6,741  |
| 1556082_a_at |                 |                                                                                   | 1,659  | 2,626  |
| 1556111_s_at |                 |                                                                                   | 2,374  | 4,549  |
| 1556188_a_at | ZNF555          | zinc finger protein 555                                                           | 1,616  | 4,488  |
| 1556199_a_at | RGS9BP          | regulator of G-protein signaling 9 binding protein                                | 1,493  | 5,872  |
| 1556202_at   | SRGAP2          | SUT-ROBO Rho GTPase activating protein 2                                          | -2,06  | 3,588  |
| 1556240_at   |                 |                                                                                   | -2,005 | 5,012  |
| 1556321_a_at | MESDC1          | mesoderm development candidate 1                                                  | -1,53  | 3,211  |
| 1556323_at   | CELF2           | CUGBP, Elav-like family member 2                                                  | -2,8   | 3,637  |
| 1556331_a_at |                 |                                                                                   | -3,148 | 2,68   |
| 1556346_at   | COTL1           | coactosin like F-actin binding protein 1                                          | -3,274 | 2,526  |
| 1556352_at   |                 |                                                                                   | -2,529 | 4,958  |
| 1556361_s_at | ANKRD13C        | ankyrin repeat domain 13C                                                         | 1,989  | 3,947  |
| 1556368_at   | PHKG2           | phosphorylase kinase catalytic subunit gamma 2                                    | -1,612 | 2,81   |
| 1556369_a_at | PHKG2           | phosphorylase kinase catalytic subunit gamma 2                                    | -2,041 | 2,566  |
| 1556389_at   | CNPY3           | canopy FGF signaling regulator 3                                                  | -1,536 | 2,714  |
| 1556402_at   |                 |                                                                                   | 1,299  | 4,549  |
| 1556429_a_at | TBC1D31         | TBC1 domain family member 31                                                      | 1,613  | 2,78   |
| 1556462_a_at |                 |                                                                                   | 0,669  | 2,626  |
| 1556492_a_at | PIAS2           | protein inhibitor of activated STAT 2                                             | 2,314  | 2,834  |
| 1556567_at   | NAP1L4          | nucleosome assembly protein 1 like 4                                              | 1,274  | 2,564  |
| 1556653_at   | ANKAR           | ankyrin and armadillo repeat containing                                           | 1,35   | 3,586  |
| 1556657_at   |                 |                                                                                   | -1,353 | 3,828  |
| 1556658_a_at |                 |                                                                                   | -1,203 | 2,691  |
| 1556679_at   |                 |                                                                                   | -1,032 | 2,874  |
| 1556750_at   | LOC153577       | uncharacterized LOC153577                                                         | -2,295 | 3,224  |
| 1556764_s_at |                 |                                                                                   | -2,601 | 2,72   |
| 1556769_a_at | LOC105371967    | uncharacterized LOC105371967                                                      | 0,936  | 3,031  |
| 1556806_at   |                 |                                                                                   | -1,328 | 2,988  |
| 1556812_a_at |                 |                                                                                   | -3,402 | 3,486  |
| 1556834_at   | DSG2-AS1        | DSG2 antisense RNA 1                                                              | 3,26   | 2,462  |
| 1556919_at   | LEPR            | leptin receptor                                                                   | 2,491  | 5,036  |
| 1556950_s_at | SERPINB6        | serpin family B member 6                                                          | -1,279 | 2,838  |
| 1556967_at   | ZDHHC14         | zinc finger DHHC-type containing 14                                               | 2,594  | 9,64   |
| 1557046_x_at | LINC00665       | long intergenic non-protein coding RNA 665                                        | 1,024  | 2,845  |
| 1557141_at   | INMT-FAM188B//  | INMT-FAM188B readthrough (NMD candidate)///family with sequence similarity 188    | 2,089  | 4,298  |
| 1557270_at   |                 |                                                                                   | 1,545  | 2,527  |
| 1557293_at   | LINC00969       | long intergenic non-protein coding RNA 969                                        | 1,34   | 2,474  |
| 1557329_at   |                 |                                                                                   | 1,221  | 3,655  |
| 1557331_at   | POLR1B          | RNA polymerase I subunit B                                                        | 1,041  | 3,827  |
| 1557347_at   | MCPH1           | microcephalin 1                                                                   | 1,163  | 2,816  |
| 1557362_at   | PHIP            | pleckstrin homology domain interacting protein                                    | 0,742  | 2,447  |
| 1557403_s_at |                 |                                                                                   | 0,985  | 5,118  |

|              |                 |                                                                           |        |       |
|--------------|-----------------|---------------------------------------------------------------------------|--------|-------|
| 1557410_at   | LOC100506606    | uncharacterized LOC100506606                                              | -2,042 | 2,725 |
| 1557417_s_at | RSPH10B2///RSPH | radial spoke head 10 homolog B2///radial spoke head 10 homolog B          | -1,311 | 3,805 |
| 1557436_at   | XKR6            | XK related 6                                                              | 2,495  | 4,252 |
| 1557519_at   |                 |                                                                           | -1,686 | 2,992 |
| 1557531_a_at | C10orf55        | chromosome 10 open reading frame 55                                       | -2,315 | 2,671 |
| 1557542_at   |                 |                                                                           | 0,971  | 3,33  |
| 1557562_at   |                 |                                                                           | -1,663 | 3,326 |
| 1557567_a_at | LOC100507634    | uncharacterized LOC100507634                                              | 1,219  | 4,046 |
| 1557576_at   | PAQR3           | progesterin and adipoQ receptor family member 3                           | 1,51   | 2,513 |
| 1557581_x_at |                 |                                                                           | 1,925  | 2,909 |
| 1557733_a_at | CHRM3-AS2       | CHRM3 antisense RNA 2                                                     | 1,171  | 3,055 |
| 1557762_at   | LOC105377458    | uncharacterized LOC105377458                                              | 2,74   | 6,143 |
| 1557768_at   | LOC101928760    | uncharacterized LOC101928760                                              | 2,009  | 9,314 |
| 1557769_at   | CHN2            | chimerin 2                                                                | 1,169  | 2,521 |
| 1557770_at   | IPO11           | importin 11                                                               | 1,738  | 2,732 |
| 1557796_at   | FAR2            | fatty acyl-CoA reductase 2                                                | -2,033 | 3,15  |
| 1557811_a_at |                 |                                                                           | -3,846 | 3,673 |
| 1557812_a_at |                 |                                                                           | 2,255  | 4,589 |
| 1557823_s_at | LOC401134       | uncharacterized LOC401134                                                 | 0,915  | 2,932 |
| 1557889_at   |                 |                                                                           | 1,178  | 4,147 |
| 1557918_s_at | SLC16A1         | solute carrier family 16 member 1                                         | 2,354  | 3,066 |
| 1557938_s_at | PTRF            | polymerase I and transcript release factor                                | 2,793  | 6,907 |
| 1557961_s_at | C8orf88         | chromosome 8 open reading frame 88                                        | 4,967  | 7,547 |
| 1558021_at   | RABEPK          | Rab9 effector protein with kelch motifs                                   | 0,901  | 2,725 |
| 1558044_s_at | EXOSC6          | exosome component 6                                                       | 0,99   | 2,857 |
| 1558101_at   | NFIA            | nuclear factor I A                                                        | 3,874  | 8,978 |
| 1558105_a_at | SLC9A7          | solute carrier family 9 member A7                                         | 2,593  | 5,171 |
| 1558199_at   | FN1             | fibronectin 1                                                             | 1,259  | 3,324 |
| 1558275_at   |                 |                                                                           | -1,64  | 3,887 |
| 1558289_at   | RFT1            | RFT1 homolog                                                              | 1,173  | 3,148 |
| 1558290_a_at | MIR1204///PVT1  | microRNA 1204///Pvt1 oncogene (non-protein coding)                        | 5,115  | 4,261 |
| 1558299_at   |                 |                                                                           | -3,438 | 3,372 |
| 1558323_at   | TMEM72          | transmembrane protein 72                                                  | 1,428  | 4,784 |
| 1558324_a_at | TMEM72          | transmembrane protein 72                                                  | 2,385  | 3,387 |
| 1558342_x_at | DIXDC1          | DIX domain containing 1                                                   | 1,051  | 4,408 |
| 1558365_at   | PGK1            | phosphoglycerate kinase 1                                                 | -1,999 | 2,479 |
| 1558440_at   | LOC100506351    | uncharacterized LOC100506351                                              | 1,98   | 6,499 |
| 1558445_at   |                 |                                                                           | 2,067  | 4,15  |
| 1558459_s_at | LOC101928623/// | uncharacterized LOC101928623///uncharacterized LOC401320                  | -1,8   | 3,099 |
| 1558486_at   | ZNF493          | zinc finger protein 493                                                   | -1,503 | 2,846 |
| 1558489_at   |                 |                                                                           | 2,172  | 4,207 |
| 1558522_at   | MPP6            | membrane palmitoylated protein 6                                          | 3,154  | 2,853 |
| 1558561_at   | HM13            | histocompatibility minor 13                                               | -2,043 | 4,195 |
| 1558573_at   | MCTS1           | MCTS1, re-initiation and release factor                                   | -0,858 | 2,479 |
| 1558588_at   | LOC100996741/// | uncharacterized LOC100996741///long intergenic non-protein coding RNA 869 | -1,902 | 4,291 |
| 1558592_at   |                 |                                                                           | -1,728 | 2,719 |
| 1558613_at   |                 |                                                                           | 1,12   | 2,865 |
| 1558624_at   |                 |                                                                           | -1,365 | 3,056 |
| 1558631_at   | PPARA           | peroxisome proliferator activated receptor alpha                          | 1,151  | 5,301 |
| 1558654_at   | PPM1H           | protein phosphatase, Mg2+/Mn2+ dependent 1H                               | -1,24  | 2,706 |
| 1558682_at   | HMGGA2          | high mobility group AT-hook 2                                             | 1,021  | 3,968 |
| 1558768_at   | DNAH1           | dynein axonemal heavy chain 1                                             | -1,771 | 2,756 |
| 1558769_s_at | DNAH1           | dynein axonemal heavy chain 1                                             | -1,641 | 2,779 |
| 1558773_s_at | RANBP10         | RAN binding protein 10                                                    | 1,829  | 3,522 |
| 1558777_at   | MKL2            | MKL1/myocardin like 2                                                     | 1,55   | 2,606 |
| 1558786_at   | TSPAN3          | tetraspanin 3                                                             | -3,223 | 4     |
| 1558787_a_at | TSPAN3          | tetraspanin 3                                                             | -3,6   | 5,908 |
| 1558791_at   | FIRRE           | firre intergenic repeating RNA element                                    | 4,092  | 3,604 |
| 1558809_s_at | ZNF790-AS1      | ZNF790 antisense RNA 1                                                    | 1,479  | 3,437 |
| 1558859_at   | LOC101928623/// | uncharacterized LOC101928623///uncharacterized LOC401320                  | -2,137 | 3,358 |
| 1558871_at   | LOC105377276    | uncharacterized LOC105377276                                              | 5,641  | 5,57  |
| 1558938_at   |                 |                                                                           | -1,756 | 3,397 |
| 1559026_at   | PPP1R26-AS1     | PPP1R26 antisense RNA 1                                                   | 0,779  | 2,483 |
| 1559034_at   | SIRPB2          | signal regulatory protein beta 2                                          | -3,435 | 2,553 |
| 1559051_s_at | MB21D1          | Mab-21 domain containing 1                                                | -2,762 | 7,49  |
| 1559067_a_at | LOC158402       | uncharacterized LOC158402                                                 | 2,26   | 3,148 |
| 1559121_s_at |                 |                                                                           | 0,918  | 2,745 |
| 1559131_a_at | LOC101928047    | uncharacterized LOC101928047                                              | 3,882  | 3,505 |
| 1559152_at   |                 |                                                                           | 0,959  | 3,106 |
| 1559154_at   |                 |                                                                           | -1,548 | 2,525 |
| 1559156_at   |                 |                                                                           | -2,132 | 3,371 |
| 1559167_x_at | MPV17L          | MPV17 mitochondrial inner membrane protein like                           | 3,384  | 4,995 |
| 1559172_at   |                 |                                                                           | 1,946  | 8,782 |
| 1559190_s_at | RDH13           | retinol dehydrogenase 13                                                  | 3,453  | 2,558 |
| 1559201_a_at |                 |                                                                           | -2,904 | 3,284 |
| 1559275_x_at | ZNF732          | zinc finger protein 732                                                   | 0,802  | 3,393 |
| 1559276_at   | PCAT18          | prostate cancer associated transcript 18 (non-protein coding)             | 2,111  | 3,906 |
| 1559315_s_at | SOCS2-AS1       | SOCS2 antisense RNA 1                                                     | 1,667  | 4,772 |
| 1559351_at   |                 |                                                                           | 1,738  | 6,292 |
| 1559361_at   | LOC101927668/// | uncharacterized LOC101927668///metastasis associated in colon cancer 1    | 1,703  | 4,438 |
| 1559391_s_at |                 |                                                                           | -2,804 | 5,111 |
| 1559477_s_at | MEIS1           | Meis homeobox 1                                                           | 2,54   | 5,366 |
| 1559485_at   | ATG2B           | autophagy related 2B                                                      | 1,021  | 2,993 |
| 1559496_at   | PPA2            | pyrophosphatase (inorganic) 2                                             | 1,722  | 2,522 |
| 1559520_at   | GYPA            | glycophorin A (MNS blood group)                                           | 0,714  | 2,596 |
| 1559548_at   | ACVR2B          | activin A receptor type 2B                                                | 1,825  | 6,517 |
| 1559584_a_at | C16orf54        | chromosome 16 open reading frame 54                                       | -1,897 | 2,558 |
| 1559701_s_at | NDST2           | N-deacetylase and N-sulfotransferase 2                                    | -1,304 | 2,653 |
| 1559716_at   | INO80C          | INO80 complex subunit C                                                   | 1,128  | 4,78  |
| 1559731_x_at | MACROD1         | MACRO domain containing 1                                                 | 1,311  | 3,144 |
| 1559827_at   | LINC00960       | long intergenic non-protein coding RNA 960                                | 1,395  | 2,565 |
| 1559975_at   | BTG1            | BTG anti-proliferation factor 1                                           | -3,098 | 2,801 |
| 1560026_at   |                 |                                                                           | -2,088 | 4,79  |
| 1560034_a_at | FCN1            | ficolin 1                                                                 | -4,79  | 2,473 |
| 1560038_at   | LOC100506071    | uncharacterized LOC100506071                                              | 1,435  | 4,277 |
| 1560101_at   | SYDE2           | synapse defective Rho GTPase homolog 2                                    | 0,826  | 2,848 |
| 1560181_at   | LDLRAD4-AS1     | LDLRAD4 antisense RNA 1                                                   | 3,191  | 7,013 |
| 1560227_at   | GDPD1           | glycerophosphodiester phosphodiesterase domain containing 1               | 1,453  | 5,164 |
| 1560241_at   | LOC101928682    | uncharacterized LOC101928682                                              | 0,815  | 2,841 |
| 1560250_s_at | LOC284242       | uncharacterized LOC284242                                                 | 1,112  | 2,764 |
| 1560255_at   | CELF2-AS1       | CELF2 antisense RNA 1                                                     | -2,782 | 2,716 |
| 1560346_at   |                 |                                                                           | 1,631  | 2,879 |

|              |               |                                                                   |        |       |
|--------------|---------------|-------------------------------------------------------------------|--------|-------|
| 1560353_at   |               |                                                                   | -1,334 | 3,076 |
| 1560369_at   | ANKH          | ANKH inorganic pyrophosphate transport regulator                  | 1,729  | 4,01  |
| 1560370_x_at | ANKH          | ANKH inorganic pyrophosphate transport regulator                  | 2,148  | 5,485 |
| 1560458_s_at | CAPS2         | calyphosine 2                                                     | 1,311  | 4,951 |
| 1560543_at   | GRK4          | G protein-coupled receptor kinase 4                               | 1,97   | 5,16  |
| 1560547_at   |               |                                                                   | 1,637  | 2,506 |
| 1560558_at   | INIP          | INTS3 and NABP interacting protein                                | -1,289 | 3,741 |
| 1560562_a_at | ZNF677        | zinc finger protein 677                                           | 1,537  | 2,795 |
| 1560587_s_at | PRDX5         | peroxiredoxin 5                                                   | -1,87  | 3,53  |
| 1560621_at   |               |                                                                   | 1,162  | 5,068 |
| 1560754_at   | CMTM7         | CKLF like MARVEL transmembrane domain containing 7                | -1,73  | 2,792 |
| 1560765_a_at | ARHGAP22      | Rho GTPase activating protein 22                                  | 0,85   | 3,665 |
| 1560800_at   |               |                                                                   | -2,986 | 3,304 |
| 1560861_at   | THRA1/BTR     | uncharacterized LOC105371807                                      | 1,939  | 5,034 |
| 1560981_a_at | PPARA         | peroxisome proliferator activated receptor alpha                  | 2,259  | 3,508 |
| 1561004_at   | PRKCQ-AS1     | PRKCQ antisense RNA 1                                             | 1,383  | 2,879 |
| 1561026_a_at | CDKAL1        | CDK5 regulatory subunit associated protein 1 like 1               | 0,667  | 2,511 |
| 1561058_at   |               |                                                                   | -3,14  | 4,446 |
| 1561092_at   |               |                                                                   | 1,385  | 2,836 |
| 1561114_a_at | DEPDC4        | DEP domain containing 4                                           | 1,935  | 3,951 |
| 1561136_at   | GYPE          | glycophorin E (MNS blood group)                                   | 1,084  | 5,861 |
| 1561137_s_at | GYPE          | glycophorin E (MNS blood group)                                   | 0,856  | 3,185 |
| 1561154_at   |               |                                                                   | -1,427 | 2,736 |
| 1561158_at   |               |                                                                   | 0,752  | 2,757 |
| 1561195_at   |               |                                                                   | 1,954  | 3,025 |
| 1561211_at   | LOC101930541  | uncharacterized LOC101930541                                      | 3,607  | 8,88  |
| 1561386_at   | LOC102723701  | uncharacterized LOC102723701                                      | -0,926 | 2,928 |
| 1561523_at   | CCDC65        | coiled-coil domain containing 65                                  | -1,492 | 2,995 |
| 1561578_s_at | SLC25A53      | solute carrier family 25 member 53                                | 1,028  | 3,656 |
| 1561633_at   | HMGGA2        | high mobility group AT-hook 2                                     | 0,841  | 2,796 |
| 1561651_s_at | TAL1          | TAL bHLH transcription factor 1, erythroid differentiation factor | 1,105  | 3,587 |
| 1561708_at   | MB21D1        | Mab-21 domain containing 1                                        | -1,997 | 3,725 |
| 1561731_at   | LOC101927636  | uncharacterized LOC101927636                                      | 1,029  | 4,92  |
| 1561760_s_at | LOC645513     | septin 7 pseudogene                                               | -0,953 | 2,571 |
| 1561770_at   |               |                                                                   | 0,791  | 2,784 |
| 1561813_at   |               |                                                                   | -1,278 | 2,826 |
| 1561908_a_at | HS3ST3B1      | heparan sulfate-glucosamine 3-sulfotransferase 3B1                | -1,858 | 3,49  |
| 1561966_at   | LOC101927647  | uncharacterized LOC101927647                                      | 2,672  | 3,723 |
| 1562059_at   |               |                                                                   | -3,942 | 3,316 |
| 1562144_at   |               |                                                                   | -0,559 | 2,457 |
| 1562226_at   | VWDE          | von Willebrand factor D and EGF domains                           | 3,323  | 3,389 |
| 1562235_s_at |               |                                                                   | 1,956  | 7,65  |
| 1562289_at   |               |                                                                   | -5,729 | 6,239 |
| 1562403_a_at | SLC8A3        | solute carrier family 8 member A3                                 | 1,104  | 3,391 |
| 1562442_a_at | SSBP1         | single stranded DNA binding protein 1                             | 1,443  | 3,598 |
| 1562458_at   | UBE2W         | ubiquitin conjugating enzyme E2 W (putative)                      | -2,414 | 7,048 |
| 1562460_at   | CNDP2         | CNDP dipeptidase 2 (metallopeptidase M20 family)                  | 1,005  | 3,282 |
| 1562511_at   | LYST          | lysosomal trafficking regulator                                   | -2,753 | 5,216 |
| 1562550_at   |               |                                                                   | 0,766  | 2,802 |
| 1562568_at   | LOC400541     | uncharacterized LOC400541                                         | 2,201  | 3,156 |
| 1562611_at   |               |                                                                   | -2,943 | 2,596 |
| 1562612_at   |               |                                                                   | -1,799 | 2,497 |
| 1562697_at   | LOC339988     | uncharacterized LOC339988                                         | -2,061 | 3,563 |
| 1562698_x_at | LOC339988     | uncharacterized LOC339988                                         | -2,039 | 3,467 |
| 1562789_at   | ZNF229        | zinc finger protein 229                                           | 1,172  | 5,574 |
| 1562957_at   |               |                                                                   | -2,038 | 4,411 |
| 1562981_at   | HBB           | hemoglobin subunit beta                                           | 1,779  | 6,932 |
| 1563109_at   |               |                                                                   | 1,423  | 4,303 |
| 1563219_at   | NADK2-AS1     | NADK2 antisense RNA 1                                             | 1,886  | 2,83  |
| 1563333_at   |               |                                                                   | -2,409 | 3,801 |
| 1563509_at   |               |                                                                   | -3,2   | 2,535 |
| 1563673_a_at | ALS2CR11      | amyotrophic lateral sclerosis 2 chromosome region candidate 11    | 0,735  | 2,513 |
| 1563796_s_at | EARS2         | glutamyl-tRNA synthetase 2, mitochondrial                         | 2,457  | 3,172 |
| 1563958_at   |               |                                                                   | -1,301 | 3,346 |
| 1564003_at   |               |                                                                   | 0,872  | 2,572 |
| 1564004_at   |               |                                                                   | -3,305 | 4,551 |
| 1564192_at   |               |                                                                   | -3,919 | 3,274 |
| 1564232_at   |               |                                                                   | 2,611  | 4,18  |
| 1564251_at   | EMID1         | EMI domain containing 1                                           | 1,781  | 4,829 |
| 1564426_x_at | LOC729732     | uncharacterized LOC729732                                         | -1,265 | 2,849 |
| 1564510_at   |               |                                                                   | -3,289 | 3,876 |
| 1564511_a_at | FSTL4         | folliculin like 4                                                 | 0,786  | 2,858 |
| 1564514_at   | SNRK          | SNF related kinase                                                | -2,149 | 2,487 |
| 1564525_at   | GSN           | gelsolin                                                          | -1,761 | 3,701 |
| 1564627_at   | DNAJC13       | DnaJ heat shock protein family (Hsp40) member C13                 | -2,053 | 3,035 |
| 1564828_at   | KIAA1211      | KIAA1211                                                          | 1,085  | 4,948 |
| 1564906_at   | SNHG4///MATR3 | small nucleolar RNA host gene 4///matrin 3                        | 1,778  | 3,871 |
| 1564907_s_at | SNHG4///MATR3 | small nucleolar RNA host gene 4///matrin 3                        | 2,069  | 2,992 |
| 1564911_at   | SNHG4         | small nucleolar RNA host gene 4                                   | 2,301  | 3,813 |
| 1564932_at   |               |                                                                   | -2,982 | 6,171 |
| 1565242_at   | TNXB          | tenascin XB                                                       | -2,115 | 2,718 |
| 1565325_at   | SNHG4///MATR3 | small nucleolar RNA host gene 4///matrin 3                        | 0,699  | 2,52  |
| 1565544_at   | RNF141        | ring finger protein 141                                           | -2,995 | 3,95  |
| 1565546_at   | RNF141        | ring finger protein 141                                           | -2,363 | 4,669 |
| 1565596_at   |               |                                                                   | -2,442 | 4,286 |
| 1565599_at   |               |                                                                   | -3,001 | 4,184 |
| 1565627_a_at |               |                                                                   | -2,737 | 6,506 |
| 1565628_at   | LRRK1         | leucine rich repeat kinase 1                                      | -2,446 | 5,216 |
| 1565638_at   | PMP22         | peripheral myelin protein 22                                      | 0,965  | 5,078 |
| 1565650_at   |               |                                                                   | -1,932 | 3,864 |
| 1565651_at   |               |                                                                   | -1,592 | 2,762 |
| 1565804_at   |               |                                                                   | -2,885 | 2,633 |
| 1565826_at   |               |                                                                   | 0,89   | 2,46  |
| 1565859_at   | SNORA71A      | small nucleolar RNA, H/ACA box 71A                                | 1,277  | 3,236 |
| 1566094_at   |               |                                                                   | 1,957  | 7,661 |
| 1566096_x_at |               |                                                                   | 1,984  | 6,581 |
| 1566115_at   |               |                                                                   | 1,529  | 2,988 |
| 1566142_at   |               |                                                                   | -1,032 | 2,592 |
| 1566144_at   |               |                                                                   | 1,048  | 2,819 |
| 1566207_at   | TCEA1         | transcription elongation factor A1                                | 1,534  | 3,983 |
| 1566267_at   |               |                                                                   | 2,162  | 2,578 |
| 1566441_at   |               |                                                                   | 0,894  | 3,452 |



|              |                |                                                                                     |        |       |
|--------------|----------------|-------------------------------------------------------------------------------------|--------|-------|
| 1566445_at   |                |                                                                                     | 1,567  | 2,981 |
| 1566446_at   |                |                                                                                     | 3,588  | 4,632 |
| 1566474_at   |                |                                                                                     | -0,983 | 2,619 |
| 1566557_at   | BAIAP2-AS1     | BAIAP2 antisense RNA 1 (head to head)                                               | -2,973 | 4,343 |
| 1566558_x_at | BAIAP2-AS1     | BAIAP2 antisense RNA 1 (head to head)                                               | -2,194 | 3,501 |
| 1566605_at   | TEX9           | testis expressed 9                                                                  | 2,348  | 5,074 |
| 1566691_at   |                |                                                                                     | -2,271 | 3,92  |
| 1566709_at   |                |                                                                                     | -2,375 | 3,228 |
| 1566760_at   | LINC00884      | long intergenic non-protein coding RNA 884                                          | 1,465  | 2,925 |
| 1566761_a_at | LINC00884      | long intergenic non-protein coding RNA 884                                          | 1,933  | 4,562 |
| 1566764_at   | MACC1          | metastasis associated in colon cancer 1                                             | 2,392  | 4,417 |
| 1566766_a_at | MACC1          | metastasis associated in colon cancer 1                                             | 2,364  | 2,473 |
| 1566908_at   | STPG3          | sperm-tail PG-rich repeat containing 3                                              | 0,94   | 2,475 |
| 1566987_s_at | LINC00674      | long intergenic non-protein coding RNA 674                                          | -1,372 | 2,537 |
| 1566989_at   | ARID1B         | AT-rich interaction domain 1B                                                       | 1,194  | 3,467 |
| 1566990_x_at | ARID1B         | AT-rich interaction domain 1B                                                       | 0,954  | 3,068 |
| 1567223_at   | HMG2           | high mobility group AT-hook 2                                                       | 1,987  | 4,588 |
| 1567224_at   | HMG2           | high mobility group AT-hook 2                                                       | 1,957  | 4,783 |
| 1567241_at   | OR2L1P         | olfactory receptor family 2 subfamily L member 1 pseudogene                         | 1,211  | 3,222 |
| 1567242_at   | OR2L1P         | olfactory receptor family 2 subfamily L member 1 pseudogene                         | 2,253  | 4,325 |
| 1567282_at   | OR1J4          | olfactory receptor family 1 subfamily J member 4                                    | 0,833  | 3,01  |
| 1567906_at   | SOX4           | SRY-box 4                                                                           | 1,952  | 5,485 |
| 1568286_at   | HMG2           | high mobility group AT-hook 2                                                       | 2,57   | 7,767 |
| 1568287_at   | HMG2           | high mobility group AT-hook 2                                                       | 3,42   | 7,171 |
| 1568365_at   |                |                                                                                     | 2,323  | 2,759 |
| 1568600_at   | CALML4         | calmodulin like 4                                                                   | -1,487 | 2,906 |
| 1568609_s_at | LOC103091866// | uncharacterized LOC103091866//long intergenic non-protein coding RNA 623//long      | -1,466 | 4,381 |
| 1568639_a_at | GATA2-AS1      | GATA2 antisense RNA 1                                                               | 2,053  | 6,729 |
| 1568699_at   | IFT43          | intraflagellar transport 43                                                         | 1,162  | 4,067 |
| 1568713_a_at | TBC1D1         | TBC1 domain family member 1                                                         | -4,695 | 2,501 |
| 1568764_x_at | LOC728613//PDC | programmed cell death 6 pseudogene//programmed cell death 6                         | 1,913  | 2,584 |
| 1568781_at   | UROS           | uroporphyrinogen III synthase                                                       | 3,073  | 3,122 |
| 1568782_at   | RP2            | retinitis pigmentosa 2 (X-linked recessive)                                         | -3,241 | 3,521 |
| 1568802_at   |                |                                                                                     | -1,54  | 2,77  |
| 1568813_at   | SLC16A1-AS1    | SLC16A1 antisense RNA 1                                                             | 2,013  | 3,471 |
| 1568830_at   | IRAK3          | interleukin 1 receptor associated kinase 3                                          | -3,336 | 4,035 |
| 1568858_at   |                |                                                                                     | 1,452  | 3,497 |
| 1568870_at   | SLC24A4        | solute carrier family 24 member 4                                                   | -3,306 | 3,546 |
| 1568882_at   | LRTOMT         | leucine rich transmembrane and O-methyltransferase domain containing                | -1,742 | 2,7   |
| 1568955_at   | SRGAP2C//SRGAF | SLIT-ROBO Rho GTPase activating protein 2C//SLIT-ROBO Rho GTPase activating prote   | -2,585 | 5,127 |
| 1568957_x_at | SRGAP2C//SRGAF | SLIT-ROBO Rho GTPase activating protein 2C//SLIT-ROBO Rho GTPase activating prote   | -2,105 | 4,675 |
| 1568971_at   | PCNX4          | pecanex homolog 4 (Drosophila)                                                      | 1,303  | 2,468 |
| 1568987_at   | MGC57346//CRH  | ADP-ribosylation factor pseudogene//CRHR1 intronic transcript 1                     | 1,133  | 3,507 |
| 1569024_at   | FAM13A         | family with sequence similarity 13 member A                                         | 2,941  | 4,795 |
| 1569040_s_at | ANKRD36BP2     | ankyrin repeat domain 36B pseudogene 2                                              | 4,002  | 5,906 |
| 1569132_s_at | ARSK           | arylsulfatase family member K                                                       | 0,756  | 2,624 |
| 1569133_x_at | ARSK           | arylsulfatase family member K                                                       | 0,68   | 2,661 |
| 1569136_at   | MGAT4A         | mannosyl (alpha-1,3-)-glycoprotein beta-1,4-N-acetylglucosaminyltransferase, isozym | -3,179 | 3,125 |
| 1569142_at   | TRIM13         | tripartite motif containing 13                                                      | -2,076 | 2,538 |
| 1569191_at   | ZNF826P        | zinc finger protein 826, pseudogene                                                 | 2,145  | 2,892 |
| 1569275_at   |                |                                                                                     | 0,919  | 2,689 |
| 1569316_at   | TRIM24         | tripartite motif containing 24                                                      | 1,741  | 2,682 |
| 1569331_at   | CNKS3          | CNKS3 family member 3                                                               | 1,513  | 5,578 |
| 1569385_s_at | TET2           | tet methylcytosine dioxygenase 2                                                    | -1,853 | 3,49  |
| 1569401_at   | CLEC12A        | C-type lectin domain family 12 member A                                             | -3,81  | 3,576 |
| 1569484_s_at | MDN1           | midasin AAA ATPase 1                                                                | 0,922  | 3,151 |
| 1569490_at   | FNDC3B         | fibronectin type III domain containing 3B                                           | -1,575 | 2,814 |
| 1569510_at   |                |                                                                                     | 1,092  | 2,507 |
| 1569512_at   | SVIL           | supervillin                                                                         | -4,756 | 5,523 |
| 1569542_at   | ADGRA3         | adhesion G protein-coupled receptor A3                                              | 2,068  | 5,204 |
| 1569609_at   |                |                                                                                     | -2,387 | 2,588 |
| 1569642_at   | F2R            | coagulation factor II thrombin receptor                                             | 1,513  | 5,568 |
| 1569652_at   | MLLT3          | MLLT3, super elongation complex subunit                                             | 4,025  | 5,517 |
| 1569699_at   | AK7            | adenylate kinase 7                                                                  | 0,849  | 3,844 |
| 1569773_at   | ATP8A1         | ATPase phospholipid transporting 8A1                                                | -2,14  | 2,626 |
| 1569864_at   | SERAC1         | serine active site containing 1                                                     | 1,182  | 3,493 |
| 1569894_at   | PPP2R3C        | protein phosphatase 2 regulatory subunit B"gamma                                    | -2,469 | 2,968 |
| 1569940_at   | SLC6A16        | solute carrier family 6 member 16                                                   | -2,371 | 2,765 |
| 1570103_at   |                |                                                                                     | 1,635  | 3,195 |
| 1570115_at   | PP12708        | uncharacterized LOC100130609                                                        | 1,115  | 2,817 |
| 1570125_at   | GHET1          | gastric carcinoma proliferation enhancing transcript 1                              | -0,807 | 3,738 |
| 1570134_at   |                |                                                                                     | -1,027 | 2,579 |
| 1570135_at   | ZNF230         | zinc finger protein 230                                                             | -1,897 | 2,775 |
| 1570207_at   | FRRS1          | ferric chelate reductase 1                                                          | 0,825  | 3,26  |
| 1570332_at   |                |                                                                                     | 1,081  | 4,091 |
| 1570393_at   | EML5           | echinoderm microtubule associated protein like 5                                    | 1,405  | 3,359 |
| 1570402_at   | KLC3           | kinesin light chain 3                                                               | 0,96   | 3,051 |
| 1570471_at   | ARHGEF12       | Rho guanine nucleotide exchange factor 12                                           | 0,991  | 3,263 |
| 1570592_a_at |                |                                                                                     | -3,331 | 5,978 |
| 1570593_at   |                |                                                                                     | -3,484 | 6,838 |
| 1773_at      | CHURC1-FNTB//F | CHURC1-FNTB readthrough//farnesyltransferase, CAAX box, beta                        | -1,175 | 2,604 |
| 200077_s_at  | OAZ1           | ornithine decarboxylase antizyme 1                                                  | -0,825 | 2,661 |
| 200078_s_at  | ATP6V0B        | ATPase H+ transporting VO subunit b                                                 | -2,34  | 4,255 |
| 200083_at    | USP22          | ubiquitin specific peptidase 22                                                     | 0,818  | 2,657 |
| 200096_s_at  | ATP6V0E1       | ATPase H+ transporting VO subunit e1                                                | -1,146 | 3,707 |
| 200601_at    | ACTN4          | actinin alpha 4                                                                     | -1,315 | 2,828 |
| 200615_s_at  | AP2B1          | adaptor related protein complex 2 beta 1 subunit                                    | 1,206  | 3,227 |
| 200625_s_at  | CAP1           | adenylate cyclase associated protein 1                                              | -2,819 | 3,197 |
| 200634_at    | PFN1           | profilin 1                                                                          | -1,319 | 2,691 |
| 200645_at    | GABARAP        | GABA type A receptor-associated protein                                             | -1,749 | 4,26  |
| 200660_at    | S100A11        | S100 calcium binding protein A11                                                    | -5,008 | 5,39  |
| 200661_at    | CTSA           | cathepsin A                                                                         | -1,377 | 2,626 |
| 200663_at    | CD63           | CD63 molecule                                                                       | -1,153 | 3,393 |
| 200671_s_at  | SPTBN1         | spectrin beta, non-erythrocytic 1                                                   | -3,209 | 6,123 |
| 200672_x_at  | SPTBN1         | spectrin beta, non-erythrocytic 1                                                   | -3,022 | 4,94  |
| 200678_x_at  | GRN            | granulin                                                                            | -3,787 | 5,601 |
| 200696_s_at  | GSN            | gelsolin                                                                            | -5,358 | 6,599 |
| 200704_at    | LITAF          | lipopolysaccharide induced TNF factor                                               | -5,179 | 4,225 |
| 200706_s_at  | LITAF          | lipopolysaccharide induced TNF factor                                               | -4,672 | 2,805 |
| 200714_x_at  | OS9            | OS9, endoplasmic reticulum lectin                                                   | -1,549 | 7,955 |
| 200724_at    | SNORA70//RPL1C | small nucleolar RNA, H/ACA box 70//ribosomal protein L10                            | -2,122 | 3,546 |
| 200728_at    | ACTR2          | ARP2 actin related protein 2 homolog                                                | -1,128 | 4,927 |

|             |              |                                                                             |        |        |
|-------------|--------------|-----------------------------------------------------------------------------|--------|--------|
| 200729_s_at | ACTR2        | ARP2 actin related protein 2 homolog                                        | -1,077 | 4,361  |
| 200737_at   | PGK1         | phosphoglycerate kinase 1                                                   | -1,219 | 2,744  |
| 200746_s_at | GNB1         | G protein subunit beta 1                                                    | -1,003 | 2,631  |
| 200760_s_at | ARL6IP5      | ADP ribosylation factor like GTPase 6 interacting protein 5                 | -0,905 | 2,893  |
| 200761_s_at | ARL6IP5      | ADP ribosylation factor like GTPase 6 interacting protein 5                 | -0,97  | 2,687  |
| 200764_s_at | CTNNA1       | catenin alpha 1                                                             | 1,121  | 2,55   |
| 200765_x_at | CTNNA1       | catenin alpha 1                                                             | 1,391  | 3,728  |
| 200766_at   | CTSD         | cathepsin D                                                                 | -3,255 | 5,839  |
| 200778_s_at | SEPT2        | septin 2                                                                    | 1,252  | 2,95   |
| 200782_at   | ANXA5        | annexin A5                                                                  | -2,27  | 4,29   |
| 200794_x_at | DAZAP2       | DAZ associated protein 2                                                    | -1,258 | 2,824  |
| 200803_s_at | TMBIM6       | transmembrane BAX inhibitor motif containing 6                              | -1,112 | 3,575  |
| 200808_s_at | ZYX          | zyxin                                                                       | -4,184 | 6,323  |
| 200821_at   | LAMP2        | lysosomal associated membrane protein 2                                     | -1,181 | 3,723  |
| 200859_x_at | FLNA         | filamin A                                                                   | -1,074 | 2,45   |
| 200871_s_at | PSAP         | prosaposin                                                                  | -1,358 | 3,272  |
| 200886_s_at | PGAM1        | phosphoglycerate mutase 1                                                   | -1,161 | 2,817  |
| 200904_at   | HLA-E        | major histocompatibility complex, class I, E                                | -3,618 | 3,083  |
| 200905_x_at | HLA-E        | major histocompatibility complex, class I, E                                | -2,903 | 3,277  |
| 200920_s_at | BTG1         | BTG anti-proliferation factor 1                                             | -2,917 | 3,91   |
| 200921_s_at | BTG1         | BTG anti-proliferation factor 1                                             | -3,462 | 5,721  |
| 200928_s_at | RAB14        | RAB14, member RAS oncogene family                                           | -1,049 | 2,673  |
| 200931_s_at | VCL          | vinculin                                                                    | -2,939 | 5,305  |
| 200974_at   | ACTA2        | actin, alpha 2, smooth muscle, aorta                                        | -1,263 | 3,361  |
| 200976_s_at | TAX1BP1      | Tax1 binding protein 1                                                      | -1,3   | 4,937  |
| 200977_s_at | TAX1BP1      | Tax1 binding protein 1                                                      | -0,996 | 3,391  |
| 200982_s_at | ANXA6        | annexin A6                                                                  | -4,118 | 4,312  |
| 200996_at   | ACTR3        | ARP3 actin related protein 3 homolog                                        | -1,199 | 3,212  |
| 201012_at   | ANXA1        | annexin A1                                                                  | -2,702 | 2,763  |
| 201032_at   | BLCAP        | bladder cancer associated protein                                           | -0,959 | 2,704  |
| 201034_at   | ADD3         | adducin 3                                                                   | -2,187 | 2,461  |
| 201040_at   | GNAI2        | G protein subunit alpha i2                                                  | -1,952 | 3,193  |
| 201042_at   | TGM2         | transglutaminase 2                                                          | 3,679  | 11,247 |
| 201059_at   | CTTN         | cortactin                                                                   | 3,241  | 6,636  |
| 201078_at   | TM9SF2       | transmembrane 9 superfamily member 2                                        | -1,494 | 3,797  |
| 201093_x_at | SDHA         | succinate dehydrogenase complex flavoprotein subunit A                      | 1,44   | 2,451  |
| 201118_at   | PGD          | phosphogluconate dehydrogenase                                              | -2,292 | 3,804  |
| 201122_x_at | EIF5A        | eukaryotic translation initiation factor 5A                                 | 1,474  | 3,126  |
| 201126_s_at | MGAT1        | mannosyl (alpha-1,3-)-glycoprotein beta-1,2-N-acetylglucosaminyltransferase | -1,581 | 4,519  |
| 201130_s_at | CDH1         | cadherin 1                                                                  | 3,932  | 10,268 |
| 201131_s_at | CDH1         | cadherin 1                                                                  | 6,926  | 5,101  |
| 201147_s_at | TIMP3        | TIMP metalloproteinase inhibitor 3                                          | 0,949  | 3,257  |
| 201149_s_at | TIMP3        | TIMP metalloproteinase inhibitor 3                                          | 1,338  | 3,422  |
| 201150_s_at | TIMP3        | TIMP metalloproteinase inhibitor 3                                          | 2,489  | 8,573  |
| 201171_at   | ATP6V0E1     | ATPase H+ transporting VO subunit e1                                        | -1,223 | 2,678  |
| 201172_x_at | ATP6V0E1     | ATPase H+ transporting VO subunit e1                                        | -1,019 | 2,972  |
| 201178_at   | FBXO7        | F-box protein 7                                                             | 2,355  | 4,025  |
| 201181_at   | GNAI3        | G protein subunit alpha i3                                                  | -2,149 | 3,462  |
| 201197_at   | AMD1         | adenosylmethionine decarboxylase 1                                          | 1,064  | 2,924  |
| 201234_at   | ILK          | integrin linked kinase                                                      | -1,579 | 3,69   |
| 201242_s_at | ATP1B1       | ATPase Na+/K+ transporting subunit beta 1                                   | 1,085  | 4,004  |
| 201250_s_at | SLC2A1       | solute carrier family 2 member 1                                            | 3,121  | 3,024  |
| 201251_at   | PKM          | pyruvate kinase, muscle                                                     | -3,992 | 5,635  |
| 201276_at   | RAB5B        | RAB5B, member RAS oncogene family                                           | -1,757 | 4,073  |
| 201288_at   | ARHGDIB      | Rho GDP dissociation inhibitor beta                                         | -1,431 | 5,955  |
| 201313_at   | ENO2         | enolase 2                                                                   | 2,915  | 5,227  |
| 201314_at   | STK25        | serine/threonine kinase 25                                                  | 1,591  | 3,97   |
| 201333_s_at | ARHGEF12     | Rho guanine nucleotide exchange factor 12                                   | 3,299  | 7,853  |
| 201334_s_at | ARHGEF12     | Rho guanine nucleotide exchange factor 12                                   | 4,204  | 13,506 |
| 201335_s_at | ARHGEF12     | Rho guanine nucleotide exchange factor 12                                   | 1,588  | 7,208  |
| 201341_at   | ENC1         | ectodermal-neural cortex 1                                                  | -2,48  | 3,163  |
| 201348_at   | GPX3         | glutathione peroxidase 3                                                    | -4,128 | 3,454  |
| 201377_at   | UBAP2L       | ubiquitin associated protein 2 like                                         | 1,257  | 2,831  |
| 201401_s_at | GRK2         | G protein-coupled receptor kinase 2                                         | -1,348 | 2,909  |
| 201418_s_at | SOX4         | SRY-box 4                                                                   | 1,098  | 2,61   |
| 201426_s_at | VIM          | vimentin                                                                    | -3,63  | 4,229  |
| 201442_s_at | ATP6AP2      | ATPase H+ transporting accessory protein 2                                  | -1,696 | 2,843  |
| 201443_s_at | ATP6AP2      | ATPase H+ transporting accessory protein 2                                  | -0,891 | 3,085  |
| 201444_s_at | ATP6AP2      | ATPase H+ transporting accessory protein 2                                  | -1,442 | 4,518  |
| 201460_at   | MAPKAPK2     | mitogen-activated protein kinase-activated protein kinase 2                 | -1,388 | 2,696  |
| 201461_s_at | MAPKAPK2     | mitogen-activated protein kinase-activated protein kinase 2                 | -1,481 | 2,469  |
| 201482_at   | QSOX1        | quiescin sulphydryl oxidase 1                                               | -2,672 | 5,074  |
| 201494_at   | PRCP         | prolylcarboxypeptidase                                                      | -1,576 | 6,233  |
| 201531_at   | ZFP36        | ZFP36 ring finger protein                                                   | -4,17  | 3,003  |
| 201534_s_at | UBL3         | ubiquitin like 3                                                            | -2,201 | 4,391  |
| 201535_at   | UBL3         | ubiquitin like 3                                                            | -2,615 | 4,462  |
| 201550_x_at | ACTG1///ACTB | actin gamma 1///actin beta                                                  | -1,195 | 3,434  |
| 201554_x_at | GYG1         | glycogenin 1                                                                | -3,075 | 3,584  |
| 201562_s_at | SORD         | sorbitol dehydrogenase                                                      | 2,333  | 3,88   |
| 201563_at   | SORD         | sorbitol dehydrogenase                                                      | 2,384  | 4,441  |
| 201564_s_at | FSCN1        | fascin actin-bundling protein 1                                             | 1,674  | 4,677  |
| 201582_at   | SEC23B       | Sec23 homolog B, coat complex II component                                  | -1,262 | 2,907  |
| 201588_at   | TXNL1        | thioredoxin like 1                                                          | 1,417  | 2,972  |
| 201605_x_at | CNN2         | calponin 2                                                                  | -2,205 | 2,765  |
| 201621_at   | NBL1         | neuroblastoma 1, DAN family BMP antagonist                                  | 0,963  | 2,511  |
| 201631_s_at | IER3         | immediate early response 3                                                  | -4,515 | 2,968  |
| 201646_at   | SCARB2       | scavenger receptor class B member 2                                         | 2,018  | 2,551  |
| 201647_s_at | SCARB2       | scavenger receptor class B member 2                                         | 1,747  | 3,209  |
| 201668_x_at | MARCKS       | myristoylated alanine rich protein kinase C substrate                       | -2,997 | 7,343  |
| 201669_s_at | MARCKS       | myristoylated alanine rich protein kinase C substrate                       | -4,207 | 8,591  |
| 201670_s_at | MARCKS       | myristoylated alanine rich protein kinase C substrate                       | -3,875 | 10,183 |
| 201673_s_at | GY51         | glycogen synthase 1                                                         | -2,364 | 3,02   |
| 201700_at   | CCND3        | cyclin D3                                                                   | -2,879 | 2,811  |
| 201717_at   | MRPL49       | mitochondrial ribosomal protein L49                                         | 1,041  | 2,658  |
| 201720_s_at | LAPTM5       | lysosomal protein transmembrane 5                                           | -1,672 | 3,024  |
| 201721_s_at | LAPTM5       | lysosomal protein transmembrane 5                                           | -1,803 | 3,809  |
| 201752_s_at | ADD3         | adducin 3                                                                   | -2,17  | 2,641  |
| 201753_s_at | ADD3         | adducin 3                                                                   | -2,593 | 2,617  |
| 201782_s_at | AIP          | aryl hydrocarbon receptor interacting protein                               | -0,974 | 3,181  |
| 201785_at   | RNASE1       | ribonuclease A family member 1, pancreatic                                  | 2,038  | 6,84   |
| 201792_at   | AEBP1        | AE binding protein 1                                                        | 1,495  | 3,155  |
| 201808_s_at | ENG          | endoglin                                                                    | 1,078  | 3,99   |

|             |                 |                                                                            |        |       |
|-------------|-----------------|----------------------------------------------------------------------------|--------|-------|
| 201809_s_at | ENG             | endoglin                                                                   | 1,215  | 4,343 |
| 201818_at   | LPCAT1          | lysophosphatidylcholine acyltransferase 1                                  | -4,498 | 6,45  |
| 201834_at   | PRKAB1          | protein kinase AMP-activated non-catalytic subunit beta 1                  | 1,252  | 3,9   |
| 201835_s_at | PRKAB1          | protein kinase AMP-activated non-catalytic subunit beta 1                  | 1,358  | 3,11  |
| 201839_s_at | EPCAM           | epithelial cell adhesion molecule                                          | 6,052  | 4,571 |
| 201849_at   | BNIP3           | BCL2 interacting protein 3                                                 | 1,277  | 2,803 |
| 201850_at   | CAPG            | capping actin protein, gelsolin like                                       | -4,16  | 5,145 |
| 201861_s_at | LRRFIP1         | LRR binding FLII interacting protein 1                                     | -1,681 | 4,991 |
| 201862_s_at | LRRFIP1         | LRR binding FLII interacting protein 1                                     | -1,891 | 7,646 |
| 201883_s_at | B4GALT1         | beta-1,4-galactosyltransferase 1                                           | -1,128 | 2,628 |
| 201896_s_at | PSRC1           | proline and serine rich coiled-coil 1                                      | -3,43  | 3,221 |
| 201921_at   | GNG10           | G protein subunit gamma 10                                                 | -2,391 | 2,763 |
| 201950_x_at | CAPZB           | capping actin protein of muscle Z-line beta subunit                        | -1,496 | 2,754 |
| 201954_at   | ARPC1B          | actin related protein 2/3 complex subunit 1B                               | -2,1   | 7,64  |
| 201962_s_at | RNF41           | ring finger protein 41                                                     | -0,878 | 3,22  |
| 201968_s_at | PGM1            | phosphoglucomutase 1                                                       | -2,223 | 5,159 |
| 202007_at   | NID1            | nidogen 1                                                                  | 4,129  | 4,149 |
| 202008_s_at | NID1            | nidogen 1                                                                  | 2,779  | 4,119 |
| 202009_at   | TWF2            | twinfilin actin binding protein 2                                          | -1,39  | 3,118 |
| 202025_x_at | ACAA1           | acetyl-CoA acyltransferase 1                                               | -1,247 | 2,608 |
| 202039_at   | MYO18A///TIAF1  | myosin XVIII//TGFBI-induced anti-apoptotic factor 1                        | -2,025 | 3,112 |
| 202068_s_at | LDLR            | low density lipoprotein receptor                                           | 2,173  | 2,681 |
| 202071_at   | SDC4            | syndecan 4                                                                 | 1,266  | 3,046 |
| 202073_at   | OPTN            | optineurin                                                                 | 1,463  | 4,224 |
| 202074_s_at | OPTN            | optineurin                                                                 | 2,107  | 4,143 |
| 202081_at   | IER2            | immediate early response 2                                                 | -2,188 | 3,158 |
| 202087_s_at | CTSL            | cathepsin L                                                                | 3,728  | 8,377 |
| 202096_s_at | TSPO            | translocator protein                                                       | -2,001 | 2,543 |
| 202097_at   | NUP153          | nucleoporin 153                                                            | 0,958  | 2,616 |
| 202100_at   | RALB            | RALB Ras like proto-oncogene B                                             | -2,576 | 4,144 |
| 202101_s_at | RALB            | RALB Ras like proto-oncogene B                                             | -2,761 | 3,625 |
| 202124_s_at | TRAK2           | trafficking kinesin protein 2                                              | 1,599  | 3,924 |
| 202125_s_at | TRAK2           | trafficking kinesin protein 2                                              | 2,094  | 4,604 |
| 202140_s_at | CLK3            | CDC like kinase 3                                                          | -1,553 | 3,139 |
| 202149_at   | NEDD9           | neural precursor cell expressed, developmentally down-regulated 9          | -4,188 | 2,586 |
| 202151_s_at | UBAC1           | UBA domain containing 1                                                    | 1,315  | 3,398 |
| 202156_s_at | CELF2           | CUGBP, Elav-like family member 2                                           | -2,17  | 4,808 |
| 202157_s_at | CELF2           | CUGBP, Elav-like family member 2                                           | -2,126 | 6,175 |
| 202158_s_at | CELF2           | CUGBP, Elav-like family member 2                                           | -1,499 | 3,555 |
| 202161_at   | PKN1            | protein kinase N1                                                          | -1,034 | 2,721 |
| 202191_s_at | GAS7            | growth arrest specific 7                                                   | -4,533 | 5,628 |
| 202192_s_at | GAS7            | growth arrest specific 7                                                   | -4,383 | 5,354 |
| 202194_at   | TMED5           | transmembrane p24 trafficking protein 5                                    | -1,307 | 2,541 |
| 202195_s_at | TMED5           | transmembrane p24 trafficking protein 5                                    | -1,21  | 2,932 |
| 202201_at   | BLVRB           | biliverdin reductase B                                                     | 3,604  | 4,965 |
| 202215_s_at | NFYC            | nuclear transcription factor Y subunit gamma                               | -0,832 | 2,633 |
| 202218_s_at | FADS2           | fatty acid desaturase 2                                                    | 1,961  | 3,692 |
| 202219_at   | SLC6A8          | solute carrier family 6 member 8                                           | 1,466  | 2,782 |
| 202228_s_at | NPTN            | neuroplastin                                                               | -2,364 | 6,831 |
| 202235_at   | SLC16A1         | solute carrier family 16 member 1                                          | 2,044  | 2,443 |
| 202241_at   | TRIB1           | tribbles pseudokinase 1                                                    | -4,735 | 2,957 |
| 202247_s_at | MTA1            | metastasis associated 1                                                    | 0,963  | 2,868 |
| 202260_s_at | STXBP1          | syntaxin binding protein 1                                                 | 2,892  | 7,356 |
| 202265_at   | COMMD3-BMI1//   | COMMD3-BMI1 readthrough///BMI1 proto-oncogene, polycomb ring finger        | 2,364  | 2,458 |
| 202348_s_at | TOR1A           | torsin family 1 member A                                                   | -1,24  | 4,179 |
| 202349_at   | TOR1A           | torsin family 1 member A                                                   | -1,147 | 3,045 |
| 202361_at   | SEC24C          | SEC24 homolog C, COPII coat complex component                              | -0,859 | 2,697 |
| 202381_at   | ADAM9           | ADAM metallopeptidase domain 9                                             | -2,562 | 4,443 |
| 202384_s_at | TCOF1           | treacle ribosome biogenesis factor 1                                       | 0,905  | 3,293 |
| 202385_s_at | TCOF1           | treacle ribosome biogenesis factor 1                                       | 1,201  | 2,932 |
| 202391_at   | BASP1           | brain abundant membrane attached signal protein 1                          | -4,61  | 5,437 |
| 202455_at   | HDAC5           | histone deacetylase 5                                                      | -1,431 | 2,876 |
| 202478_at   | TRIB2           | tribbles pseudokinase 2                                                    | 5,961  | 6,415 |
| 202479_s_at | TRIB2           | tribbles pseudokinase 2                                                    | 4,796  | 7,581 |
| 202481_at   | DHRS3           | dehydrogenase/reductase 3                                                  | 2,673  | 6,063 |
| 202489_s_at | FXYP3           | FXYP domain containing ion transport regulator 3                           | 1,016  | 2,748 |
| 202500_at   | DNAJB2          | DnaJ heat shock protein family (Hsp40) member B2                           | -1,477 | 2,696 |
| 202504_at   | TRIM29          | tripartite motif containing 29                                             | 1,144  | 2,555 |
| 202510_s_at | TNFAIP2         | TNF alpha induced protein 2                                                | -4,738 | 3,762 |
| 202530_at   | MAPK14          | mitogen-activated protein kinase 14                                        | -2,023 | 3,851 |
| 202545_at   | PRKCD           | protein kinase C delta                                                     | -4,64  | 6,369 |
| 202552_s_at | LOC101929500/// | uncharacterized LOC101929500///cysteine rich transmembrane BMP regulator 1 | -1,348 | 2,752 |
| 202565_s_at | SVIL            | supervillin                                                                | -4,238 | 4,342 |
| 202566_s_at | SVIL            | supervillin                                                                | -3,68  | 3,251 |
| 202587_s_at | AK1             | adenylate kinase 1                                                         | 2,784  | 5,983 |
| 202597_at   | IRF6            | interferon regulatory factor 6                                             | 2,464  | 4,259 |
| 202619_s_at | PLOD2           | procollagen-lysine,2-oxoglutarate 5-dioxygenase 2                          | 3,093  | 8,56  |
| 202620_s_at | PLOD2           | procollagen-lysine,2-oxoglutarate 5-dioxygenase 2                          | 4,44   | 9,491 |
| 202660_at   | ITPR2           | inositol 1,4,5-trisphosphate receptor type 2                               | 1,324  | 2,609 |
| 202728_s_at | LTBP1           | latent transforming growth factor beta binding protein 1                   | 2,865  | 4,176 |
| 202729_s_at | LTBP1           | latent transforming growth factor beta binding protein 1                   | 3,341  | 2,493 |
| 202732_at   | PKIG            | protein kinase (cAMP-dependent, catalytic) inhibitor gamma                 | 3,92   | 3,855 |
| 202740_at   | ABHD14A-ACY1//  | ABHD14A-ACY1 readthrough///aminoacylase 1                                  | 2,122  | 2,5   |
| 202743_at   | PIK3R3          | phosphoinositide-3-kinase regulatory subunit 3                             | 1,653  | 3,536 |
| 202762_at   | ROCK2           | Rho associated coiled-coil containing protein kinase 2                     | 1,344  | 4,292 |
| 202763_at   | CASP3           | caspase 3                                                                  | 1,493  | 5,583 |
| 202769_at   | CCNG2           | cyclin G2                                                                  | -2,533 | 3,245 |
| 202770_s_at | CCNG2           | cyclin G2                                                                  | -2,728 | 2,527 |
| 202777_at   | SHOC2           | SHOC2, leucine rich repeat scaffold protein                                | -1,139 | 3,076 |
| 202787_s_at | MAPKAPK3        | mitogen-activated protein kinase-activated protein kinase 3                | -1,384 | 4,48  |
| 202788_at   | MAPKAPK3        | mitogen-activated protein kinase-activated protein kinase 3                | -1,457 | 3,092 |
| 202789_at   | PLCG1           | phospholipase C gamma 1                                                    | 1,054  | 4,415 |
| 202793_at   | LPCAT3          | lysophosphatidylcholine acyltransferase 3                                  | 1,277  | 5,596 |
| 202794_at   | INPP1           | inositol polyphosphate-1-phosphatase                                       | -2,293 | 2,655 |
| 202803_s_at | ITGB2           | integrin subunit beta 2                                                    | -5,052 | 4,759 |
| 202825_at   | SLC25A4         | solute carrier family 25 member 4                                          | 1,295  | 5,825 |
| 202833_s_at | SERPINA1        | serpin family A member 1                                                   | -6,675 | 2,94  |
| 202856_s_at | MIR6787///SLC16 | microRNA 6787///solute carrier family 16 member 3                          | -3,878 | 4,276 |
| 202860_at   | DENND4B         | DENN domain containing 4B                                                  | -1,613 | 2,823 |
| 202863_at   | SP100           | SP100 nuclear antigen                                                      | -1,613 | 2,762 |
| 202872_at   | ATP6V1C1        | ATPase H+ transporting V1 subunit C1                                       | -0,848 | 2,615 |
| 202877_s_at | CD93            | CD93 molecule                                                              | -3,669 | 4,353 |

|             |                |                                                                                |        |       |
|-------------|----------------|--------------------------------------------------------------------------------|--------|-------|
| 202878_s_at | CD93           | CD93 molecule                                                                  | -6,874 | 9,82  |
| 202888_s_at | ANPEP          | alanyl aminopeptidase, membrane                                                | -3,642 | 2,997 |
| 202889_x_at | MAP7           | microtubule associated protein 7                                               | 2,521  | 3,783 |
| 202893_at   | UNC13B         | unc-13 homolog B                                                               | 1,672  | 2,723 |
| 202895_s_at | SIRPA          | signal regulatory protein alpha                                                | -2,706 | 2,767 |
| 202896_s_at | SIRPA          | signal regulatory protein alpha                                                | -2,234 | 3,106 |
| 202897_at   | SIRPA          | signal regulatory protein alpha                                                | -3,702 | 5,168 |
| 202901_x_at | CTSS           | cathepsin S                                                                    | -3,034 | 2,773 |
| 202902_s_at | CTSS           | cathepsin S                                                                    | -3,711 | 2,595 |
| 202917_s_at | S100A8         | S100 calcium binding protein A8                                                | -6,485 | 8,81  |
| 202932_at   | YES1           | YES proto-oncogene 1, Src family tyrosine kinase                               | 3,038  | 4,46  |
| 202948_at   | IL1R1          | interleukin 1 receptor type 1                                                  | -4,65  | 3,659 |
| 202949_s_at | FHL2           | four and a half LIM domains 2                                                  | 4,732  | 7,541 |
| 202957_at   | HCLS1          | hematopoietic cell-specific Lyn substrate 1                                    | -2,749 | 2,67  |
| 202967_at   | GSTA4          | glutathione S-transferase alpha 4                                              | 2,708  | 5,451 |
| 202973_x_at | FAM13A         | family with sequence similarity 13 member A                                    | 1,925  | 4,202 |
| 202975_s_at | RHOBTB3        | Rho related BTB domain containing 3                                            | 2,645  | 5,102 |
| 202976_s_at | RHOBTB3        | Rho related BTB domain containing 3                                            | 1,978  | 3,8   |
| 202982_s_at | ACOT1///ACOT2  | acyl-CoA thioesterase 1///acyl-CoA thioesterase 2                              | 1,931  | 2,863 |
| 203006_at   | INPP5A         | inositol polyphosphate-5-phosphatase A                                         | -2,573 | 4,874 |
| 203018_s_at | SSX2IP         | SSX family member 2 interacting protein                                        | 2,501  | 4,074 |
| 203019_x_at | SSX2IP         | SSX family member 2 interacting protein                                        | 1,611  | 3,277 |
| 203028_s_at | CYBA           | cytochrome b-245 alpha chain                                                   | -2,559 | 3,597 |
| 203036_s_at | MTSS1          | metastasis suppressor 1                                                        | 1,403  | 3,873 |
| 203037_s_at | MTSS1          | metastasis suppressor 1                                                        | 2,839  | 6,151 |
| 203040_s_at | HMBS           | hydroxymethylbilane synthase                                                   | 2,883  | 3,751 |
| 203041_s_at | LAMP2          | lysosomal associated membrane protein 2                                        | -1,686 | 2,47  |
| 203042_at   | LAMP2          | lysosomal associated membrane protein 2                                        | -2,365 | 2,766 |
| 203044_at   | CHSY1          | chondroitin sulfate synthase 1                                                 | -1,107 | 3,455 |
| 203047_at   | STK10          | serine/threonine kinase 10                                                     | -2,245 | 2,838 |
| 203063_at   | PPM1F          | protein phosphatase, Mg2+/Mn2+ dependent 1F                                    | -1,847 | 2,716 |
| 203078_at   | CUL2           | cullin 2                                                                       | 1,09   | 3,502 |
| 203098_at   | CDYL           | chromodomain Y-like                                                            | 2,059  | 2,845 |
| 203099_s_at | CDYL           | chromodomain Y-like                                                            | 1,027  | 3,212 |
| 203100_s_at | CDYL           | chromodomain Y-like                                                            | 2,089  | 3,092 |
| 203110_at   | PTK2B          | protein tyrosine kinase 2 beta                                                 | -2,601 | 3,922 |
| 203111_s_at | PTK2B          | protein tyrosine kinase 2 beta                                                 | -1,894 | 3,02  |
| 203115_at   | FECH           | ferrochelatase                                                                 | 4,829  | 3,824 |
| 203116_s_at | FECH           | ferrochelatase                                                                 | 4,073  | 2,626 |
| 203126_at   | IMPA2          | inositol monophosphatase 2                                                     | -1,621 | 4,382 |
| 203136_at   | RABAC1         | Rab acceptor 1                                                                 | -2,187 | 4,155 |
| 203140_at   | BCL6           | B-cell CLL/lymphoma 6                                                          | -6,4   | 4,02  |
| 203141_s_at | AP3B1          | adaptor related protein complex 3 beta 1 subunit                               | -0,742 | 2,723 |
| 203155_at   | SETDB1         | SET domain bifurcated 1                                                        | -0,766 | 3,069 |
| 203167_at   | TIMP2          | TIMP metalloproteinase inhibitor 2                                             | -4,611 | 6,807 |
| 203184_at   | FBN2           | fibrillin 2                                                                    | -3,314 | 3,799 |
| 203185_at   | RASSF2         | Ras association domain family member 2                                         | -5,641 | 6,057 |
| 203196_at   | ABCC4          | ATP binding cassette subfamily C member 4                                      | 4,832  | 2,716 |
| 203228_at   | PAFAH1B3       | platelet activating factor acetylhydrolase 1b catalytic subunit 3              | 1,436  | 2,962 |
| 203233_at   | IL4R           | interleukin 4 receptor                                                         | -3,335 | 3,07  |
| 203234_at   | UPP1           | uridine phosphorylase 1                                                        | -3,54  | 3,345 |
| 203260_at   | HDDC2          | HD domain containing 2                                                         | 1,468  | 4,213 |
| 203261_at   | DCTN6          | dynactin subunit 6                                                             | 1,009  | 2,737 |
| 203262_s_at | FAM50A         | family with sequence similarity 50 member A                                    | -1,632 | 5,079 |
| 203289_s_at | NPRL3          | NPR3 like, GATOR1 complex subunit                                              | 0,879  | 2,649 |
| 203299_s_at | AP1S2          | adaptor related protein complex 1 sigma 2 subunit                              | -2,262 | 5,049 |
| 203300_x_at | AP1S2          | adaptor related protein complex 1 sigma 2 subunit                              | -3,511 | 6,285 |
| 203326_x_at |                |                                                                                | -1,035 | 2,464 |
| 203333_at   | KIFAP3         | kinesin associated protein 3                                                   | 2,632  | 3,227 |
| 203351_s_at | ORC4           | origin recognition complex subunit 4                                           | 1,391  | 5,236 |
| 203352_at   | ORC4           | origin recognition complex subunit 4                                           | 1,151  | 3,027 |
| 203372_s_at | SOCS2          | suppressor of cytokine signaling 2                                             | 4,49   | 9,334 |
| 203373_at   | SOCS2          | suppressor of cytokine signaling 2                                             | 4,323  | 7,994 |
| 203386_at   | TBC1D4         | TBC1 domain family member 4                                                    | 3,596  | 4,244 |
| 203387_s_at | TBC1D4         | TBC1 domain family member 4                                                    | 2,38   | 4,767 |
| 203388_at   | ARRB2          | arrestin beta 2                                                                | -3,281 | 3,605 |
| 203397_s_at | GALNT3         | polypeptide N-acetylgalactosaminyltransferase 3                                | -4,198 | 10,45 |
| 203402_at   | KCNAB2         | potassium voltage-gated channel subfamily A regulatory beta subunit 2          | -2,455 | 7,067 |
| 203411_s_at | LMNA           | lamin A/C                                                                      | 2,421  | 8,231 |
| 203451_at   | LDB1           | LIM domain binding 1                                                           | 1,477  | 3,598 |
| 203458_at   | SPR            | sepiapterin reductase (7,8-dihydrobiopterin:NADP+ oxidoreductase)              | 0,866  | 3,948 |
| 203467_at   | PMM1           | phosphomannomutase 1                                                           | -1,973 | 6,446 |
| 203470_s_at | PLEK           | pleckstrin                                                                     | -2,814 | 2,768 |
| 203471_s_at | PLEK           | pleckstrin                                                                     | -4,36  | 6,16  |
| 203490_at   | ELF4           | E74 like ETS transcription factor 4                                            | -1,903 | 3,335 |
| 203509_at   | SORL1          | sortilin related receptor 1                                                    | -5,321 | 5,601 |
| 203518_at   | LYST           | lysosomal trafficking regulator                                                | -3,695 | 8,104 |
| 203524_s_at | MPST           | mercaptopyruvate sulfurtransferase                                             | 0,691  | 2,454 |
| 203535_at   | S100A9         | S100 calcium binding protein A9                                                | -6,688 | 3,745 |
| 203567_s_at | TRIM38         | tripartite motif containing 38                                                 | -2,337 | 6,887 |
| 203568_s_at | TRIM38         | tripartite motif containing 38                                                 | -3,009 | 7,273 |
| 203591_s_at | CSF3R          | colony stimulating factor 3 receptor                                           | -4,429 | 4,366 |
| 203608_at   | ALDH5A1        | aldehyde dehydrogenase 5 family member A1                                      | 4,012  | 3,081 |
| 203609_s_at | ALDH5A1        | aldehyde dehydrogenase 5 family member A1                                      | 1,568  | 4,053 |
| 203610_s_at | TRIM38         | tripartite motif containing 38                                                 | -3,068 | 6,66  |
| 203614_at   | ALG11///UTP14C | ALG11, alpha-1,2-mannosyltransferase///UTP14, small subunit processome compone | 1,45   | 3,133 |
| 203644_s_at | MON1B          | MON1 homolog B, secretory trafficking associated                               | -1,517 | 3,058 |
| 203651_at   | ZFYVE16        | zinc finger FYVE-type containing 16                                            | -2,588 | 2,93  |
| 203652_at   | MAP3K11        | mitogen-activated protein kinase kinase kinase 11                              | -1,561 | 2,543 |
| 203656_at   | FIG4           | FIG4 phosphoinositide 5-phosphatase                                            | -1,638 | 3,076 |
| 203657_s_at | CTSF           | cathepsin F                                                                    | 1,146  | 3,082 |
| 203661_s_at | TMOD1          | tropomodulin 1                                                                 | 3,823  | 8,013 |
| 203662_s_at | TMOD1          | tropomodulin 1                                                                 | 2,646  | 5,391 |
| 203676_at   | GNS            | glucosamine (N-acetyl)-6-sulfatase                                             | -1,572 | 4,442 |
| 203680_at   | PRKAR2B        | protein kinase cAMP-dependent type II regulatory subunit beta                  | 5,561  | 4,798 |
| 203704_s_at | RREB1          | ras responsive element binding protein 1                                       | 1,669  | 2,54  |
| 203705_s_at | FZD7           | frizzled class receptor 7                                                      | 1,989  | 8,346 |
| 203706_s_at | FZD7           | frizzled class receptor 7                                                      | 1,35   | 3,421 |
| 203709_at   | PHKG2          | phosphorylase kinase catalytic subunit gamma 2                                 | -1,016 | 3,295 |
| 203760_s_at | SLA            | Src-like-adaptor                                                               | -3,422 | 4,368 |
| 203761_at   | SLA            | Src-like-adaptor                                                               | -4,038 | 6,37  |
| 203765_at   | GCA            | grancalcin                                                                     | -2,721 | 4,509 |

|             |                                                                                  |                                                                        |        |        |
|-------------|----------------------------------------------------------------------------------|------------------------------------------------------------------------|--------|--------|
| 203778_at   | MANBA                                                                            | mannosidase beta                                                       | -1,478 | 3,919  |
| 203788_s_at | SEMA3C                                                                           | semaphorin 3C                                                          | 2,253  | 2,749  |
| 203794_at   | CDC42BPA                                                                         | CDC42 binding protein kinase alpha                                     | 3,64   | 7,836  |
| 203795_s_at | BCL7A                                                                            | BCL tumor suppressor 7A                                                | 2,756  | 6,489  |
| 203796_s_at | BCL7A                                                                            | BCL tumor suppressor 7A                                                | 3,455  | 4,207  |
| 203799_at   | LY75-CD302///CD: LY75-CD302 readthrough///CD302 molecule///lymphocyte antigen 75 |                                                                        | -2,022 | 7,317  |
| 203817_at   | GUCY1B3                                                                          | guanylate cyclase 1 soluble subunit beta                               | 4,109  | 5,715  |
| 203819_s_at | IGF2BP3                                                                          | insulin like growth factor 2 mRNA binding protein 3                    | -1,008 | 2,682  |
| 203823_at   | RGS3                                                                             | regulator of G-protein signaling 3                                     | -2,004 | 3,53   |
| 203834_s_at | TGOLN2                                                                           | trans-golgi network protein 2                                          | -1,525 | 2,497  |
| 203846_at   | TRIM32                                                                           | tripartite motif containing 32                                         | 2,324  | 3,764  |
| 203855_at   | WDR47                                                                            | WD repeat domain 47                                                    | -1,104 | 3,049  |
| 203879_at   | PIK3CD                                                                           | phosphatidylinositol-4,5-bisphosphate 3-kinase catalytic subunit delta | -3,649 | 6,222  |
| 203895_at   | PLCB4                                                                            | phospholipase C beta 4                                                 | 0,935  | 2,699  |
| 203896_s_at | PLCB4                                                                            | phospholipase C beta 4                                                 | 1,179  | 4,302  |
| 203908_at   | SLC4A4                                                                           | solute carrier family 4 member 4                                       | 0,955  | 4,795  |
| 203912_s_at | DNASE1L1                                                                         | deoxyribonuclease 1 like 1                                             | -2,24  | 3,489  |
| 203917_at   | CXADR                                                                            | coxsackie virus and adenovirus receptor                                | 3,989  | 9,004  |
| 203919_at   | TCEA2                                                                            | transcription elongation factor A2                                     | -1,07  | 2,839  |
| 203922_s_at | CYBB                                                                             | cytochrome b-245 beta chain                                            | -4,949 | 2,86   |
| 203923_s_at | CYBB                                                                             | cytochrome b-245 beta chain                                            | -5,323 | 3,55   |
| 203944_x_at | BTN2A1                                                                           | butyrophilin subfamily 2 member A1                                     | -2,242 | 2,758  |
| 203973_s_at | CEBPD                                                                            | CCAAT/enhancer binding protein delta                                   | -5,536 | 7,989  |
| 203989_x_at | F2R                                                                              | coagulation factor II thrombin receptor                                | 1,819  | 6,494  |
| 204029_at   | CELSR2                                                                           | cadherin EGF LAG seven-pass G-type receptor 2                          | 1,096  | 4,551  |
| 204039_at   | CEBPA                                                                            | CCAAT/enhancer binding protein alpha                                   | -3,156 | 6,513  |
| 204063_s_at | ULK2                                                                             | unc-51 like autophagy activating kinase 2                              | 1,597  | 3,002  |
| 204066_s_at | AGAP1                                                                            | ArfGAP with GTPase domain, ankyrin repeat and PH domain 1              | 3,417  | 8,051  |
| 204069_at   | MEIS1                                                                            | Meis homeobox 1                                                        | 2,282  | 6,666  |
| 204072_s_at | FRY                                                                              | FRY microtubule binding protein                                        | -3,249 | 4,178  |
| 204101_at   | MTM1                                                                             | myotubularin 1                                                         | -0,882 | 2,735  |
| 204118_at   | CD48                                                                             | CD48 molecule                                                          | -4,152 | 8,863  |
| 204122_at   | TYROBP                                                                           | TYRO protein tyrosine kinase binding protein                           | -5,913 | 6,029  |
| 204141_at   | TUBB2A                                                                           | tubulin beta 2A class IIa                                              | 4,339  | 2,765  |
| 204151_x_at | AKR1C1                                                                           | aldo-keto reductase family 1 member C1                                 | 3,65   | 4,226  |
| 204158_s_at | TCIRG1                                                                           | T-cell immune regulator 1, ATPase H+ transporting VO subunit a3        | -2,811 | 2,444  |
| 204172_at   | CPOX                                                                             | coproporphyrinogen oxidase                                             | 3,359  | 2,481  |
| 204174_at   | ALOX5AP                                                                          | arachidonate 5-lipoxygenase activating protein                         | -6,457 | 6,787  |
| 204187_at   | GMPT                                                                             | guanosine monophosphate reductase                                      | 2,447  | 4,65   |
| 204204_at   | SLC31A2                                                                          | solute carrier family 31 member 2                                      | -3,237 | 5,854  |
| 204210_s_at | PCYT1A                                                                           | phosphate cytidylyltransferase 1, choline, alpha                       | -1,877 | 2,614  |
| 204214_s_at | RAB32                                                                            | RAB32, member RAS oncogene family                                      | -3,189 | 4,206  |
| 204220_at   | GMFG                                                                             | glia maturation factor gamma                                           | -2,054 | 3,768  |
| 204225_at   | HDAC4                                                                            | histone deacetylase 4                                                  | -2,598 | 5,857  |
| 204232_at   | FCER1G                                                                           | Fc fragment of IgE receptor Ig                                         | -6,466 | 6,279  |
| 204236_at   | FLI1                                                                             | Fli-1 proto-oncogene, ETS transcription factor                         | -2,331 | 8,608  |
| 204254_s_at | VDR                                                                              | vitamin D (1,25- dihydroxyvitamin D3) receptor                         | -3,744 | 5,087  |
| 204255_s_at | VDR                                                                              | vitamin D (1,25- dihydroxyvitamin D3) receptor                         | -2,036 | 2,761  |
| 204257_at   | FADS3                                                                            | fatty acid desaturase 3                                                | 1,09   | 3,285  |
| 204261_s_at | PSEN2                                                                            | presenilin 2                                                           | 0,87   | 2,575  |
| 204262_s_at | PSEN2                                                                            | presenilin 2                                                           | 1,256  | 3,391  |
| 204265_s_at | GPSM3                                                                            | G-protein signaling modulator 3                                        | -3,616 | 3,31   |
| 204276_at   | TK2                                                                              | thymidine kinase 2, mitochondrial                                      | -1,437 | 2,624  |
| 204279_at   | PSMB9                                                                            | proteasome subunit beta 9                                              | -4,197 | 6,117  |
| 204305_at   | MIPEP                                                                            | mitochondrial intermediate peptidase                                   | 1,905  | 2,536  |
| 204311_at   | ATP1B2                                                                           | ATPase Na+/K+ transporting subunit beta 2                              | 2,996  | 10,991 |
| 204321_at   | NEO1                                                                             | neogenin 1                                                             | 2,887  | 10,308 |
| 204331_s_at | MRPS12                                                                           | mitochondrial ribosomal protein S12                                    | 0,972  | 2,693  |
| 204334_at   | KLF7                                                                             | Kruppel like factor 7                                                  | -3,557 | 4,611  |
| 204336_s_at | RGS19                                                                            | regulator of G-protein signaling 19                                    | -2,627 | 3,007  |
| 204342_at   | SLC25A24                                                                         | solute carrier family 25 member 24                                     | -1,713 | 3,379  |
| 204351_at   | S100P                                                                            | S100 calcium binding protein P                                         | -7,517 | 8,117  |
| 204361_s_at | SKAP2                                                                            | src kinase associated phosphoprotein 2                                 | -2,244 | 4,198  |
| 204379_s_at | FGFR3                                                                            | fibroblast growth factor receptor 3                                    | 2,715  | 8,759  |
| 204385_at   | KYNU                                                                             | kynureninase                                                           | 1,689  | 2,659  |
| 204389_at   | MAOA                                                                             | monoamine oxidase A                                                    | 1,267  | 3,722  |
| 204393_s_at | ACPP                                                                             | acid phosphatase, prostate                                             | -3,574 | 6,558  |
| 204396_s_at | GRK5                                                                             | G protein-coupled receptor kinase 5                                    | -3,412 | 2,684  |
| 204403_x_at | LOC100294033///                                                                  | protein FAM115A-like///TRPM8 channel associated factor 1               | 1,71   | 2,764  |
| 204411_at   | KIF21B                                                                           | kinesin family member 21B                                              | -5,255 | 3,556  |
| 204412_s_at | NEFH                                                                             | neurofilament heavy polypeptide                                        | 2,522  | 3,151  |
| 204416_x_at | APOC1                                                                            | apolipoprotein C1                                                      | 5,229  | 7,231  |
| 204419_x_at | HBG2///HBG1                                                                      | hemoglobin subunit gamma 2///hemoglobin subunit gamma 1                | 3,587  | 3,253  |
| 204436_at   | PLEKHO2                                                                          | pleckstrin homology domain containing O2                               | -3,026 | 2,776  |
| 204442_x_at | LTBP4                                                                            | latent transforming growth factor beta binding protein 4               | 0,812  | 2,72   |
| 204467_s_at | SNCA                                                                             | synuclein alpha                                                        | 1,897  | 3,728  |
| 204477_at   | RABIF                                                                            | RAB interacting factor                                                 | -1,215 | 3,044  |
| 204479_at   | OSTF1                                                                            | osteoclast stimulating factor 1                                        | -3,039 | 5,011  |
| 204485_s_at | TOM1L1                                                                           | target of myb1 like 1 membrane trafficking protein                     | 2,438  | 3,664  |
| 204499_at   | AGTPBP1                                                                          | ATP/GTP binding protein 1                                              | -2,021 | 2,652  |
| 204500_s_at | AGTPBP1                                                                          | ATP/GTP binding protein 1                                              | -1,844 | 3,098  |
| 204505_s_at | DMTN                                                                             | dematin actin binding protein                                          | 1,098  | 3,399  |
| 204526_s_at | TBC1D8                                                                           | TBC1 domain family member 8                                            | -3,427 | 2,698  |
| 204527_at   | MYOSA                                                                            | myosin VA                                                              | -4,098 | 4,674  |
| 204540_at   | EEF1A2                                                                           | eukaryotic translation elongation factor 1 alpha 2                     | 0,711  | 2,598  |
| 204547_at   | RAB40B                                                                           | RAB40B, member RAS oncogene family                                     | 3,593  | 4,044  |
| 204554_at   | PPP1R3D                                                                          | protein phosphatase 1 regulatory subunit 3D                            | -2,835 | 3,428  |
| 204577_s_at | CLUAP1                                                                           | clusterin associated protein 1                                         | 1,091  | 3,084  |
| 204612_at   | PKIA                                                                             | protein kinase (cAMP-dependent, catalytic) inhibitor alpha             | 2,86   | 6,737  |
| 204613_at   | PLCG2                                                                            | phospholipase C gamma 2                                                | -2,879 | 5,063  |
| 204615_x_at | IDI1                                                                             | isopentenyl-diphosphate delta isomerase 1                              | -1,494 | 5,2    |
| 204624_at   | ATP7B                                                                            | ATPase copper transporting beta                                        | 4,037  | 8,964  |
| 204629_at   | PARVB                                                                            | parvin beta                                                            | 2,862  | 2,916  |
| 204647_at   | HOMER3                                                                           | homer scaffolding protein 3                                            | -2,473 | 4,166  |
| 204671_s_at | ANKRD6                                                                           | ankyrin repeat domain 6                                                | -3,807 | 4,631  |
| 204691_x_at | PLA2G6                                                                           | phospholipase A2 group VI                                              | 1,034  | 3,329  |
| 204699_s_at | DIEXF                                                                            | digestive organ expansion factor homolog (zebrafish)                   | 1,846  | 3,394  |
| 204720_s_at | DNAJC6                                                                           | DnaJ heat shock protein family (Hsp40) member C6                       | 5,281  | 6,188  |
| 204721_s_at | DNAJC6                                                                           | DnaJ heat shock protein family (Hsp40) member C6                       | 1,965  | 7,597  |
| 204724_s_at | COL9A3                                                                           | collagen type IX alpha 3 chain                                         | -2,61  | 2,747  |
| 204730_at   | RIMS3                                                                            | regulating synaptic membrane exocytosis 3                              | 1,852  | 6,531  |
| 204757_s_at | C2CD2L                                                                           | C2CD2 like                                                             | -1,88  | 3,227  |

|             |                 |                                                                                     |        |        |
|-------------|-----------------|-------------------------------------------------------------------------------------|--------|--------|
| 204761_at   | USP6NL          | USP6 N-terminal like                                                                | 2,166  | 2,522  |
| 204764_at   | CHURC1-FNTB///F | CHURC1-FNTB readthrough///farnesyltransferase, CAAX box, beta                       | -1,546 | 2,876  |
| 204774_at   | EV12A           | ecotropic viral integration site 2A                                                 | -4,391 | 4,664  |
| 204777_s_at | MAL             | mal, T-cell differentiation protein                                                 | 1,513  | 3,79   |
| 204782_at   | MLF1            | myeloid leukemia factor 1                                                           | 0,883  | 2,472  |
| 204788_s_at | PPOX            | protoporphyrinogen oxidase                                                          | 2,693  | 4,442  |
| 204806_x_at | HLA-F           | major histocompatibility complex, class I, F                                        | -3,28  | 5,502  |
| 204834_at   | FGL2            | fibrinogen like 2                                                                   | -4,943 | 2,502  |
| 204848_x_at | HBG2///HBG1     | hemoglobin subunit gamma 2///hemoglobin subunit gamma 1                             | 3,954  | 3,714  |
| 204859_s_at | APAF1           | apoptotic peptidase activating factor 1                                             | -2,986 | 7,036  |
| 204872_at   | TLE4            | transducin like enhancer of split 4                                                 | -2,912 | 6,95   |
| 204882_at   | ARHGAP25        | Rho GTPase activating protein 25                                                    | -3,555 | 3,292  |
| 204897_at   | PTGER4          | prostaglandin E receptor 4                                                          | -3,524 | 4,602  |
| 204912_at   | IL10RA          | interleukin 10 receptor subunit alpha                                               | -2,764 | 5,546  |
| 204917_s_at | MLLT3           | MLLT3, super elongation complex subunit                                             | 3,669  | 3,39   |
| 204918_s_at | MLLT3           | MLLT3, super elongation complex subunit                                             | 2,907  | 8,83   |
| 204923_at   | SASH3           | SAM and SH3 domain containing 3                                                     | -3,418 | 4,703  |
| 204924_at   | TLR2            | toll like receptor 2                                                                | -4,577 | 3,03   |
| 204936_at   | MAP4K2          | mitogen-activated protein kinase kinase kinase kinase 2                             | -1,147 | 2,754  |
| 204948_s_at | FST             | folistatin                                                                          | 1,544  | 4,896  |
| 204949_at   | ICAM3           | intercellular adhesion molecule 3                                                   | -2,744 | 2,955  |
| 204959_at   | MNDA            | myeloid cell nuclear differentiation antigen                                        | -6,649 | 10,258 |
| 204971_at   | CSTA            | cystatin A                                                                          | -4,698 | 12,016 |
| 204976_s_at | AMMECR1         | Alport syndrome, mental retardation, midface hypoplasia and elliptocytosis chromosc | 2,061  | 2,923  |
| 204980_at   | CLOCK           | clock circadian regulator                                                           | 1,68   | 2,592  |
| 204982_at   | GIT2            | GiT ArfGAP 2                                                                        | -2,635 | 5,035  |
| 204989_s_at | ITGB4           | integrin subunit beta 4                                                             | 1,246  | 3,957  |
| 204999_s_at | ATF5            | activating transcription factor 5                                                   | 1,621  | 2,934  |
| 205005_s_at | NMT2            | N-myristoyltransferase 2                                                            | 2,419  | 7,915  |
| 205018_s_at | MBNL2           | muscleblind like splicing regulator 2                                               | 2,351  | 3,089  |
| 205025_at   | ZBTB48          | zinc finger and BTB domain containing 48                                            | -0,82  | 2,492  |
| 205027_s_at | MAP3K8          | mitogen-activated protein kinase kinase kinase 8                                    | -2,484 | 3,178  |
| 205033_s_at | DEFA1B///DEFA3/ | defensin alpha 1B///defensin alpha 3///defensin alpha 1                             | -5,311 | 3,566  |
| 205071_x_at | XRCC4           | X-ray repair cross complementing 4                                                  | -0,999 | 2,985  |
| 205088_at   | MAMLD1          | mastermind like domain containing 1                                                 | 1,715  | 6,691  |
| 205110_s_at | FGF13           | fibroblast growth factor 13                                                         | -4,068 | 2,534  |
| 205128_x_at | PTGS1           | prostaglandin-endoperoxide synthase 1                                               | 2,121  | 4,463  |
| 205161_s_at | PEX11A          | peroxisomal biogenesis factor 11 alpha                                              | 1,191  | 2,694  |
| 205162_at   | ERCC8           | ERCC excision repair 8, CSA ubiquitin ligase complex subunit                        | 2,068  | 2,595  |
| 205171_at   | PTPN4           | protein tyrosine phosphatase, non-receptor type 4                                   | 1,635  | 3,92   |
| 205191_at   | RP2             | retinitis pigmentosa 2 (X-linked recessive)                                         | -2,09  | 3,521  |
| 205196_s_at | AP1S1           | adaptor related protein complex 1 sigma 1 subunit                                   | 0,88   | 2,512  |
| 205209_at   | ACVR1B          | activin A receptor type 1B                                                          | -3,283 | 6,284  |
| 205213_at   | ACAP1           | ArfGAP with coiled-coil, ankyrin repeat and PH domains 1                            | -2,808 | 2,546  |
| 205229_s_at | COCH            | cochlin                                                                             | 3,575  | 2,964  |
| 205248_at   | DOPEY2          | dopey family member 2                                                               | -1,986 | 4,006  |
| 205253_at   | PBX1            | PBX homeobox 1                                                                      | 1,355  | 2,841  |
| 205262_at   | KCNH2           | potassium voltage-gated channel subfamily H member 2                                | 1,854  | 4,119  |
| 205268_s_at | ADD2            | adducin 2                                                                           | 6,002  | 4,256  |
| 205269_at   | LCP2            | lymphocyte cytosolic protein 2                                                      | -2,101 | 2,984  |
| 205270_s_at | LCP2            | lymphocyte cytosolic protein 2                                                      | -1,893 | 2,791  |
| 205277_at   | PRDM2           | PR/SET domain 2                                                                     | -2,128 | 4,1    |
| 205278_at   | GAD1            | glutamate decarboxylase 1                                                           | 3,939  | 5,404  |
| 205285_s_at | FYB             | FYN binding protein                                                                 | -4,27  | 4,507  |
| 205318_at   | KIF5A           | kinesin family member 5A                                                            | 0,677  | 2,685  |
| 205351_at   | GGCX            | gamma-glutamyl carboxylase                                                          | -1,366 | 2,866  |
| 205352_at   | SERPINI1        | serpin family I member 1                                                            | 3,306  | 5,945  |
| 205354_at   | GAMT            | guanidinoacetate N-methyltransferase                                                | 1,076  | 3,136  |
| 205355_at   | ACADSB          | acyl-CoA dehydrogenase, short/branched chain                                        | 1,055  | 2,575  |
| 205357_s_at | AGTR1           | angiotensin II receptor type 1                                                      | 3,008  | 11,433 |
| 205389_s_at | ANK1            | ankyrin 1                                                                           | 6,057  | 6,159  |
| 205390_s_at | ANK1            | ankyrin 1                                                                           | 5,624  | 5,837  |
| 205391_x_at | ANK1            | ankyrin 1                                                                           | 3,714  | 7,888  |
| 205400_at   | WAS             | Wiskott-Aldrich syndrome                                                            | -2,857 | 3,706  |
| 205417_s_at | DAG1            | dystroglycan 1                                                                      | 2,153  | 3,878  |
| 205418_at   | FES             | FES proto-oncogene, tyrosine kinase                                                 | -1,893 | 3,982  |
| 205434_s_at | AAK1            | AP2 associated kinase 1                                                             | -1,528 | 4,05   |
| 205435_s_at | AAK1            | AP2 associated kinase 1                                                             | -1,486 | 4,352  |
| 205447_s_at | MAP3K12         | mitogen-activated protein kinase kinase kinase 12                                   | -0,868 | 2,868  |
| 205452_at   | PIGB            | phosphatidylinositol glycan anchor biosynthesis class B                             | -1,151 | 2,743  |
| 205453_at   | HOXB2           | homeobox B2                                                                         | 2,006  | 5,493  |
| 205479_s_at | PLAU            | plasminogen activator, urokinase                                                    | -2,99  | 6,915  |
| 205489_at   | CRYM            | crystallin mu                                                                       | 2,007  | 7,389  |
| 205544_s_at | CR2             | complement component 3d receptor 2                                                  | 1,217  | 2,957  |
| 205557_at   | LOC149684///BPI | uncharacterized LOC149684///bactericidal/permeability-increasing protein            | -6,751 | 3,468  |
| 205570_at   | PIP4K2A         | phosphatidylinositol-5-phosphate 4-kinase type 2 alpha                              | 1,027  | 2,457  |
| 205582_s_at | GGT5            | gamma-glutamyltransferase 5                                                         | 0,671  | 2,471  |
| 205597_at   | SLC44A4         | solute carrier family 44 member 4                                                   | 2,152  | 8,135  |
| 205606_at   | LRP6            | LDL receptor related protein 6                                                      | 1,173  | 2,589  |
| 205627_at   | CDA             | cytidine deaminase                                                                  | -5,242 | 3,564  |
| 205632_s_at | PIPSK1B         | phosphatidylinositol-4-phosphate 5-kinase type 1 beta                               | 1,723  | 2,768  |
| 205639_at   | AOAH            | acyloxyacyl hydrolase                                                               | -2,953 | 5,524  |
| 205640_at   | ALDH3B1         | aldehyde dehydrogenase 3 family member B1                                           | -2,695 | 4,803  |
| 205664_at   | KIN             | Kin17 DNA and RNA binding protein                                                   | -1,163 | 3,745  |
| 205668_at   | LY75            | lymphocyte antigen 75                                                               | -1,636 | 3,069  |
| 205677_s_at | DLEU1           | deleted in lymphocytic leukemia 1                                                   | 0,967  | 2,613  |
| 205705_at   | ANKRD26         | ankyrin repeat domain 26                                                            | 2,441  | 2,619  |
| 205707_at   | IL17RA          | interleukin 17 receptor A                                                           | -4,061 | 3,954  |
| 205715_at   | BST1            | bone marrow stromal cell antigen 1                                                  | -4,466 | 6,685  |
| 205743_at   | STAC            | SH3 and cysteine rich domain                                                        | 1,85   | 5,259  |
| 205750_at   | BPHL            | biphenyl hydrolase like                                                             | 1,676  | 3,68   |
| 205790_at   | SKAP1           | src kinase associated phosphoprotein 1                                              | 1,843  | 3,553  |
| 205837_s_at | GYPA            | glycophorin A (MNS blood group)                                                     | 3,089  | 4,778  |
| 205838_at   | GYPA            | glycophorin A (MNS blood group)                                                     | 2,768  | 7,089  |
| 205856_at   | SLC14A1         | solute carrier family 14 member 1 (Kidd blood group)                                | 1,995  | 7,416  |
| 205865_at   | ARID3A          | AT-rich interaction domain 3A                                                       | -1,933 | 2,665  |
| 205880_at   | PRKD1           | protein kinase D1                                                                   | 1,036  | 3,304  |
| 205896_at   | SLC22A4         | solute carrier family 22 member 4                                                   | -1,992 | 2,944  |
| 205904_at   | MICA            | MHC class I polypeptide-related sequence A                                          | -1,337 | 2,812  |
| 205905_s_at | MICA///MICB     | MHC class I polypeptide-related sequence A///MHC class I polypeptide-related sequer | -1,428 | 3,135  |
| 205927_s_at | CTSE            | cathepsin E                                                                         | 1,464  | 5,426  |
| 205934_at   | PLCL1           | phospholipase C like 1                                                              | -2,566 | 2,757  |

|             |                 |                                                                                        |        |        |
|-------------|-----------------|----------------------------------------------------------------------------------------|--------|--------|
| 205937_at   | CGREF1          | cell growth regulator with EF-hand domain 1                                            | 1,938  | 4,203  |
| 205944_s_at | CLTCL1          | clathrin heavy chain like 1                                                            | -3,866 | 4,906  |
| 205945_at   | IL6R            | interleukin 6 receptor                                                                 | -6,215 | 7,999  |
| 205950_s_at | CA1             | carbonic anhydrase 1                                                                   | 6,128  | 3,874  |
| 205961_s_at | PSIP1           | PC4 and SFRS1 interacting protein 1                                                    | 1,226  | 2,657  |
| 205965_at   | BATF            | basic leucine zipper ATF-like transcription factor                                     | -1,569 | 4,668  |
| 205976_at   | FASTKD2         | FAST kinase domains 2                                                                  | 1,674  | 2,541  |
| 206003_at   | CEP135          | centrosomal protein 135                                                                | 1,095  | 2,584  |
| 206011_at   | CASP1           | caspase 1                                                                              | -4,453 | 3,124  |
| 206023_at   | NMU             | neuromedin U                                                                           | 3,378  | 5,418  |
| 206034_at   | SERPINB8        | serpin family B member 8                                                               | -3,518 | 3,042  |
| 206060_s_at | PTPN22          | protein tyrosine phosphatase, non-receptor type 22                                     | -2,761 | 2,862  |
| 206077_at   | KEL             | Kell blood group, metallo-endopeptidase                                                | 3,729  | 10,803 |
| 206082_at   | HCP5            | HLA complex P5 (non-protein coding)                                                    | -4,842 | 4,105  |
| 206093_x_at | TNXB//TNXA      | tenascin XB//tenascin XA (pseudogene)                                                  | 1,096  | 2,768  |
| 206109_at   | FUT1            | fucosyltransferase 1 (H blood group)                                                   | 4,236  | 7,119  |
| 206120_at   | CD33            | CD33 molecule                                                                          | -2,145 | 3,925  |
| 206145_at   | RHAG            | Rh-associated glycoprotein                                                             | 6,279  | 5,687  |
| 206146_s_at | RHAG            | Rh-associated glycoprotein                                                             | 2,565  | 7,843  |
| 206167_s_at | ARHGAP6         | Rho GTPase activating protein 6                                                        | 1,191  | 3,68   |
| 206168_at   | ZC3H7B          | zinc finger CCCH-type containing 7B                                                    | 0,86   | 3,308  |
| 206170_at   | ADRB2           | adrenoceptor beta 2                                                                    | -3,968 | 5,455  |
| 206200_s_at | ANXA11          | annexin A11                                                                            | -2,612 | 5,614  |
| 206207_at   | CLC             | Charcot-Leyden crystal galectin                                                        | -4,453 | 3,395  |
| 206219_s_at | VAV1            | vav guanine nucleotide exchange factor 1                                               | -2,512 | 3,285  |
| 206261_at   | ZNF239          | zinc finger protein 239                                                                | 1,615  | 2,626  |
| 206264_at   | GPLD1           | glycosylphosphatidylinositol specific phospholipase D1                                 | 1,041  | 3,058  |
| 206265_s_at | GPLD1           | glycosylphosphatidylinositol specific phospholipase D1                                 | 1,066  | 2,641  |
| 206271_at   | TLR3            | toll like receptor 3                                                                   | 1,629  | 6,119  |
| 206283_s_at | TAL1            | TAL bHLH transcription factor 1, erythroid differentiation factor                      | 5,905  | 6,059  |
| 206298_at   | ARHGAP22        | Rho GTPase activating protein 22                                                       | 3,938  | 4,495  |
| 206306_at   | RYR3            | ryanodine receptor 3                                                                   | 5,618  | 9,447  |
| 206335_at   | GALNS           | galactosamine (N-acetyl)-6-sulfatase                                                   | -3,07  | 4,324  |
| 206369_s_at | PIK3CG          | phosphatidylinositol-4,5-bisphosphate 3-kinase catalytic subunit gamma                 | -2,842 | 4,51   |
| 206370_at   | PIK3CG          | phosphatidylinositol-4,5-bisphosphate 3-kinase catalytic subunit gamma                 | -2,446 | 5,364  |
| 206380_s_at | CFP             | complement factor properdin                                                            | -5,52  | 3,01   |
| 206391_at   | RARRES1         | retinoic acid receptor responder 1                                                     | 1,589  | 5,591  |
| 206395_at   | DGKG            | diacylglycerol kinase gamma                                                            | -1,731 | 2,771  |
| 206397_x_at | CERS1///GDF1    | ceramide synthase 1///growth differentiation factor 1                                  | 0,648  | 2,568  |
| 206440_at   | LIN7A           | lin-7 homolog A, crumbs cell polarity complex component                                | -6,039 | 11,44  |
| 206465_at   | ACSBG1          | acyl-CoA synthetase bubblegum family member 1                                          | 1,041  | 2,952  |
| 206478_at   | FAM30A          | family with sequence similarity 30, member A                                           | 4,945  | 6,063  |
| 206488_s_at | CD36            | CD36 molecule                                                                          | 6,213  | 3,814  |
| 206493_at   | ITGA2B          | integrin subunit alpha 2b                                                              | 4,907  | 7,428  |
| 206494_s_at | ITGA2B          | integrin subunit alpha 2b                                                              | 1,603  | 5,298  |
| 206514_s_at | CYP4F2///CYP4F3 | cytochrome P450 family 4 subfamily F member 2///cytochrome P450 family 4 subfam        | -5,83  | 2,775  |
| 206528_at   | TRPC6           | transient receptor potential cation channel subfamily C member 6                       | 1,536  | 7,92   |
| 206543_at   | SMARCA2         | SWI/SNF related, matrix associated, actin dependent regulator of chromatin, subfamil   | 1,374  | 2,872  |
| 206548_at   |                 |                                                                                        | -2,087 | 2,878  |
| 206591_at   | RAG1            | recombination activating gene 1                                                        | 0,987  | 2,63   |
| 206594_at   | PASK            | PAS domain containing serine/threonine kinase                                          | 2,367  | 3,746  |
| 206607_at   | CBL             | Cbl proto-oncogene                                                                     | -3,311 | 4,652  |
| 206643_at   | HAL             | histidine ammonia-lyase                                                                | -5,032 | 6,634  |
| 206653_at   | POLR3G          | RNA polymerase III subunit G                                                           | 1,523  | 2,865  |
| 206654_s_at | POLR3G          | RNA polymerase III subunit G                                                           | 1,589  | 2,694  |
| 206656_s_at | APMAP           | adipocyte plasma membrane associated protein                                           | -2,253 | 2,982  |
| 206669_at   | GAD1            | glutamate decarboxylase 1                                                              | 2,9    | 7,319  |
| 206670_s_at | GAD1            | glutamate decarboxylase 1                                                              | 1,744  | 5,413  |
| 206676_at   | CEACAM8         | carcinoembryonic antigen related cell adhesion molecule 8                              | -7,394 | 3,659  |
| 206687_s_at | PTPN6           | protein tyrosine phosphatase, non-receptor type 6                                      | -3,381 | 4,712  |
| 206693_at   | IL7             | interleukin 7                                                                          | 3,809  | 5,474  |
| 206698_at   | XK              | X-linked Kx blood group                                                                | 6,344  | 6,112  |
| 206704_at   | CLCN5           | chloride voltage-gated channel 5                                                       | 2,578  | 4,842  |
| 206712_at   | GRTP1           | growth hormone regulated TBC protein 1                                                 | 1,097  | 2,714  |
| 206746_at   | BFSP1           | beaded filament structural protein 1                                                   | 1,641  | 3,764  |
| 206751_s_at | PCYT1B          | phosphate cytidylyltransferase 1, choline, beta                                        | 3,913  | 10,631 |
| 206793_at   | PNMT            | phenylethanolamine N-methyltransferase                                                 | 1,47   | 4,365  |
| 206800_at   | MTHFR           | methylenetetrahydrofolate reductase (NAD(P)H)                                          | 1,334  | 3,482  |
| 206820_at   | AGFG2           | ArfGAP with FG repeats 2                                                               | 0,771  | 2,516  |
| 206834_at   | HBD             | hemoglobin subunit delta                                                               | 6,317  | 3,136  |
| 206841_at   | PDE6H           | phosphodiesterase 6H                                                                   | -4,516 | 4,618  |
| 206847_s_at | HOKA7           | homeobox A7                                                                            | 1,158  | 2,848  |
| 206857_s_at | FKBP1B          | FK506 binding protein 1B                                                               | 2,656  | 3,082  |
| 206896_s_at | GNG7            | G protein subunit gamma 7                                                              | -1,686 | 2,664  |
| 206934_at   | SIRPB1          | signal regulatory protein beta 1                                                       | -6,203 | 5,093  |
| 206937_at   | SPTA1           | spectrin alpha, erythrocytic 1                                                         | 4,748  | 6,598  |
| 206943_at   | TGFBR1          | transforming growth factor beta receptor 1                                             | -2,819 | 3,427  |
| 206965_at   | KLF12           | Kruppel like factor 12                                                                 | 1,054  | 5,095  |
| 206966_s_at | KLF12           | Kruppel like factor 12                                                                 | 1,735  | 5,294  |
| 207008_at   | CXCR2           | C-X-C motif chemokine receptor 2                                                       | -5,401 | 3,446  |
| 207011_s_at | PTK7            | protein tyrosine kinase 7 (inactive)                                                   | 0,979  | 2,478  |
| 207017_at   | RAB27B          | RAB27B, member RAS oncogene family                                                     | 0,914  | 3,677  |
| 207018_s_at | RAB27B          | RAB27B, member RAS oncogene family                                                     | 1,377  | 4,461  |
| 207044_at   | THRB            | thyroid hormone receptor beta                                                          | 2,467  | 6,513  |
| 207075_at   | NLRP3           | NLR family pyrin domain containing 3                                                   | -2,498 | 2,667  |
| 207087_x_at | ANK1            | ankyrin 1                                                                              | 4,23   | 8,578  |
| 207100_s_at | VAMP1           | vesicle associated membrane protein 1                                                  | -1,939 | 2,748  |
| 207119_at   | PRKG1           | protein kinase, cGMP-dependent, type I                                                 | 0,929  | 2,891  |
| 207120_at   | ZNF667          | zinc finger protein 667                                                                | 2,12   | 2,999  |
| 207194_s_at | ICAM4           | intercellular adhesion molecule 4 (Landsteiner-Wiener blood group)                     | 2,669  | 6,999  |
| 207205_at   | CEACAM4         | carcinoembryonic antigen related cell adhesion molecule 4                              | -2,046 | 2,588  |
| 207246_at   | ZFY             | zinc finger protein, Y-linked                                                          | 1,203  | 4,192  |
| 207255_at   | LEPROT//LEPR    | leptin receptor overlapping transcript//leptin receptor                                | 1,13   | 3,47   |
| 207346_at   | STX2            | syntaxin 2                                                                             | 0,932  | 2,624  |
| 207386_at   | CYP7B1          | cytochrome P450 family 7 subfamily B member 1                                          | 3,156  | 6,145  |
| 207419_s_at | RAC2            | ras-related C3 botulinum toxin substrate 2 (rho family, small GTP binding protein Rac2 | -2,622 | 3,204  |
| 207455_at   | P2RY1           | purinergic receptor P2Y1                                                               | 4,458  | 2,617  |
| 207459_x_at | GYPB            | glycophorin B (MNS blood group)                                                        | 1,765  | 3,195  |
| 207469_s_at | PIR             | pirin                                                                                  | 4,394  | 11,018 |
| 207478_at   | PRO2958         | uncharacterized LOC100128329                                                           | 2,278  | 2,471  |
| 207505_at   | PRKG2           | protein kinase, cGMP-dependent, type II                                                | 2,136  | 6,827  |
| 207522_s_at | ATP2A3          | ATPase sarcoplasmic/endoplasmic reticulum Ca2+ transporting 3                          | -2,463 | 4,604  |

|             |                  |                                                                                           |        |        |
|-------------|------------------|-------------------------------------------------------------------------------------------|--------|--------|
| 207523_at   | C6orf10          | chromosome 6 open reading frame 10                                                        | 0,725  | 2,465  |
| 207524_at   | MIR6132///ST7-O  | microRNA 6132///ST7 overlapping transcript 3///suppression of tumorigenicity 7            | 2,097  | 2,795  |
| 207540_s_at | SYK              | spleen associated tyrosine kinase                                                         | -1,793 | 5,055  |
| 207565_s_at | MR1              | major histocompatibility complex, class I-related                                         | -1,65  | 4,878  |
| 207566_at   | MR1              | major histocompatibility complex, class I-related                                         | -1,31  | 3,82   |
| 207571_x_at | THEMIS2          | thymocyte selection associated family member 2                                            | -2,902 | 3,325  |
| 207574_s_at | GADD45B          | growth arrest and DNA damage inducible beta                                               | -3,774 | 6,364  |
| 207594_s_at | SYNJ1            | synaptojanin 1                                                                            | -2,116 | 3,463  |
| 207596_at   | SLCO4C1          | solute carrier organic anion transporter family member 4C1                                | -5,567 | 5,294  |
| 207629_s_at | ARHGEF2          | Rho/Rac guanine nucleotide exchange factor 2                                              | -1,245 | 2,846  |
| 207643_s_at | TNFRSF1A         | TNF receptor superfamily member 1A                                                        | -2,176 | 3,543  |
| 207661_s_at | SH3PXD2A         | SH3 and PX domains 2A                                                                     | 1,084  | 3,27   |
| 207674_at   | FCAR             | Fc fragment of IgA receptor                                                               | -5,856 | 3,89   |
| 207691_x_at | ENTPD1           | ectonucleoside triphosphate diphosphohydrolase 1                                          | -5,618 | 6,848  |
| 207699_at   | ZFX2             | zinc finger homeobox 2                                                                    | -0,744 | 2,723  |
| 207704_s_at | GAS7             | growth arrest specific 7                                                                  | -3,169 | 2,973  |
| 207714_s_at | SERPINH1         | serpin family H member 1                                                                  | 1,624  | 2,609  |
| 207732_s_at | DLG3             | discs large MAGUK scaffold protein 3                                                      | 1,083  | 4,298  |
| 207738_s_at | NCKAP1           | NCK associated protein 1                                                                  | 1,789  | 9,512  |
| 207741_x_at | TPSAB1           | trypsin alpha/beta 1                                                                      | 0,746  | 2,592  |
| 207764_s_at | HIPK3            | homeodomain interacting protein kinase 3                                                  | -1,726 | 3,712  |
| 207791_s_at | RAB1A            | RAB1A, member RAS oncogene family                                                         | -1,267 | 6,469  |
| 207809_s_at | ATP6AP1          | ATPase H+ transporting accessory protein 1                                                | -1,493 | 3,916  |
| 207821_s_at | PTK2             | protein tyrosine kinase 2                                                                 | 2,258  | 7,144  |
| 207827_x_at | SNCA             | synuclein alpha                                                                           | 1,935  | 2,84   |
| 207833_s_at | HLC5             | holocarboxylase synthetase                                                                | 1,053  | 2,508  |
| 207847_s_at | MUC1             | mucin 1, cell surface associated                                                          | 1,924  | 6,406  |
| 207854_at   | GYPE             | glycophorin E (MNS blood group)                                                           | 1,929  | 5,963  |
| 207857_at   | LILRA2           | leukocyte immunoglobulin like receptor A2                                                 | -6,633 | 6,626  |
| 207858_s_at | PKLR             | pyruvate kinase, liver and RBC                                                            | 4,359  | 5,257  |
| 207883_s_at | TFR2             | transferrin receptor 2                                                                    | 2,608  | 6,803  |
| 207892_at   | CD40LG           | CD40 ligand                                                                               | 2,128  | 4,423  |
| 207935_s_at | KRT13            | keratin 13                                                                                | 1,57   | 5,298  |
| 207957_s_at | PRKCB            | protein kinase C beta                                                                     | -3,566 | 6,764  |
| 207968_s_at | MEF2C            | myocyte enhancer factor 2C                                                                | 2,624  | 3,573  |
| 207988_s_at | ARPC2            | actin related protein 2/3 complex subunit 2                                               | -2,174 | 5,56   |
| 207992_s_at | AMPD3            | adenosine monophosphate deaminase 3                                                       | -2,541 | 2,758  |
| 207996_s_at | LDLRAD4          | low density lipoprotein receptor class A domain containing 4                              | 2,527  | 2,883  |
| 208010_s_at | PTPN22           | protein tyrosine phosphatase, non-receptor type 22                                        | -3,113 | 3,736  |
| 208016_s_at | AGTR1            | angiotensin II receptor type 1                                                            | 4,676  | 11,452 |
| 208018_s_at | HCK              | HCK proto-oncogene, Src family tyrosine kinase                                            | -5,107 | 4,732  |
| 208025_s_at | HMGAA2           | high mobility group AT-hook 2                                                             | 2,319  | 5,639  |
| 208072_s_at | DGKD             | diacylglycerol kinase delta                                                               | -2,52  | 4,486  |
| 208127_s_at | SOC55            | suppressor of cytokine signaling 5                                                        | 0,916  | 2,592  |
| 208184_s_at | LOC102724200///  | trafficking protein particle complex subunit 10-like///trafficking protein particle compl | -1,116 | 2,697  |
| 208194_s_at | STAM2            | signal transducing adaptor molecule 2                                                     | -1,42  | 3,804  |
| 208200_at   | IL1A             | interleukin 1 alpha                                                                       | -1,936 | 3,041  |
| 208206_s_at | RASGRP2          | RAS guanyl releasing protein 2                                                            | -2,374 | 7,497  |
| 208216_at   | DLX4             | distal-less homeobox 4                                                                    | 0,922  | 2,839  |
| 208218_s_at | ACVR1B           | activin A receptor type 1B                                                                | -2,576 | 3,331  |
| 208223_s_at | ACVR1B           | activin A receptor type 1B                                                                | -2,923 | 2,723  |
| 208276_at   |                  |                                                                                           | -2,23  | 2,774  |
| 208296_x_at | TNFAIP8          | TNF alpha induced protein 8                                                               | -1,266 | 2,589  |
| 208328_s_at | MEF2A            | myocyte enhancer factor 2A                                                                | -1,465 | 3,268  |
| 208352_x_at | ANK1             | ankyrin 1                                                                                 | 3,98   | 7,296  |
| 208353_x_at | ANK1             | ankyrin 1                                                                                 | 4,528  | 6,969  |
| 208363_s_at | INPP4A           | inositol polyphosphate-4-phosphatase type I A                                             | -1,597 | 3,274  |
| 208365_s_at | GRK4             | G protein-coupled receptor kinase 4                                                       | 1,586  | 3,421  |
| 208381_s_at | SGPL1            | sphingosine-1-phosphate lyase 1                                                           | -2,197 | 2,543  |
| 208386_x_at | DMC1             | DNA meiotic recombinase 1                                                                 | 0,792  | 2,988  |
| 208403_x_at | MAX              | MYC associated factor X                                                                   | -1,913 | 3,865  |
| 208416_s_at | SPTB             | spectrin beta, erythrocytic                                                               | 1,993  | 5,293  |
| 208438_s_at | FGR              | FGR proto-oncogene, Src family tyrosine kinase                                            | -7,815 | 6,154  |
| 208451_s_at | C4B_2///C4B///C4 | complement component 4B (Chido blood group), copy 2///complement component 4              | 2,022  | 4,429  |
| 208467_at   | KLF12            | Kruppel like factor 12                                                                    | 1,414  | 3,634  |
| 208469_s_at | PPT2-EGFL8///EGF | PPT2-EGFL8 readthrough (NMD candidate)///EGF like domain multiple 8///palmitoyl-γ         | 0,874  | 2,472  |
| 208485_x_at | CFLAR            | CASP8 and FADD like apoptosis regulator                                                   | -2,968 | 3,039  |
| 208499_s_at | DNAJC3           | DnaJ heat shock protein family (Hsp40) member C3                                          | -1,583 | 4,443  |
| 208501_at   | GFI1B            | growth factor independent 1B transcriptional repressor                                    | 2,493  | 6,027  |
| 208540_x_at |                  |                                                                                           | -3,355 | 5,472  |
| 208550_x_at | KCNQ2            | potassium voltage-gated channel modifier subfamily G member 2                             | 0,917  | 4,093  |
| 208567_s_at | LOC100996843///  | ATP-sensitive inward rectifier potassium channel 12-like///potassium voltage-gated ct     | 0,863  | 3,497  |
| 208569_at   | HIST1H2AB        | histone cluster 1, H2ab                                                                   | 2,073  | 2,454  |
| 208571_at   | ANP3D2           | acidic nuclear phosphoprotein 32 family member D                                          | 1,012  | 3,352  |
| 208611_s_at | SPTAN1           | spectrin alpha, non-erythrocytic 1                                                        | -1,641 | 3,293  |
| 208615_s_at | PTP4A2           | protein tyrosine phosphatase type IVA, member 2                                           | 1,038  | 2,714  |
| 208636_at   | ACTN1            | actinin alpha 1                                                                           | -2,637 | 6,258  |
| 208637_x_at | ACTN1            | actinin alpha 1                                                                           | -3,204 | 5,223  |
| 208650_s_at | CD24             | CD24 molecule                                                                             | -5,89  | 2,733  |
| 208651_x_at | CD24             | CD24 molecule                                                                             | -5,315 | 3,06   |
| 208678_at   | ATP6V1E1         | ATPase H+ transporting V1 subunit E1                                                      | -1,199 | 3,547  |
| 208679_s_at | ARPC2            | actin related protein 2/3 complex subunit 2                                               | -2,243 | 6,468  |
| 208690_s_at | PDZD1            | PDZ and LIM domain 1                                                                      | 4,015  | 3,92   |
| 208699_x_at | TKT              | transketolase                                                                             | -2,015 | 2,848  |
| 208712_at   | CCND1            | cyclin D1                                                                                 | 1,57   | 3,672  |
| 208724_s_at | RAB1A            | RAB1A, member RAS oncogene family                                                         | -1,174 | 4,933  |
| 208729_x_at | HLA-B            | major histocompatibility complex, class I, B                                              | -2,509 | 3,692  |
| 208732_at   | RAB2A            | RAB2A, member RAS oncogene family                                                         | -1,023 | 3,287  |
| 208736_at   | ARPC3            | actin related protein 2/3 complex subunit 3                                               | -1,234 | 3,003  |
| 208789_at   | PTRF             | polymerase I and transcript release factor                                                | 3,571  | 6,01   |
| 208790_s_at | PTRF             | polymerase I and transcript release factor                                                | 1,645  | 3,432  |
| 208806_at   | CHD3             | chromodomain helicase DNA binding protein 3                                               | -1,334 | 4,162  |
| 208812_x_at | HLA-C            | major histocompatibility complex, class I, C                                              | -2,329 | 5,073  |
| 208820_at   | PTK2             | protein tyrosine kinase 2                                                                 | 3,72   | 8,462  |
| 208862_s_at | TMX2-CTNND1///   | TMX2-CTNND1 readthrough (NMD candidate)///catenin delta 1                                 | 1,758  | 3,372  |
| 208881_x_at | ID1              | isopentenyl-diphosphate delta isomerase 1                                                 | -1,506 | 5,405  |
| 208885_at   | LCP1             | lymphocyte cytosolic protein 1                                                            | -2,594 | 5,669  |
| 208891_at   | DUSP6            | dual specificity phosphatase 6                                                            | -5,341 | 7,239  |
| 208892_s_at | DUSP6            | dual specificity phosphatase 6                                                            | -5,368 | 7,006  |
| 208893_s_at | DUSP6            | dual specificity phosphatase 6                                                            | -4,516 | 6,169  |
| 208898_at   | ATP6V1D          | ATPase H+ transporting V1 subunit D                                                       | -1,119 | 2,655  |
| 208899_x_at | ATP6V1D          | ATPase H+ transporting V1 subunit D                                                       | -1,165 | 2,46   |



|             |                 |                                                                                    |        |       |
|-------------|-----------------|------------------------------------------------------------------------------------|--------|-------|
| 208901_s_at | TOP1            | topoisomerase (DNA) I                                                              | 0,898  | 3,062 |
| 208922_s_at | NXF1            | nuclear RNA export factor 1                                                        | -1,58  | 2,874 |
| 208924_at   | RNF11           | ring finger protein 11                                                             | -1,352 | 2,565 |
| 208926_at   | NEU1            | neuraminidase 1 (lysosomal sialidase)                                              | -1,644 | 3,594 |
| 208959_s_at | ERP44           | endoplasmic reticulum protein 44                                                   | -1,156 | 3,358 |
| 208964_s_at | MIR1908///FADS1 | microRNA 1908///fatty acid desaturase 1                                            | 2,506  | 3,122 |
| 208971_at   | UROD            | uroporphyrinogen decarboxylase                                                     | 2,574  | 2,631 |
| 208981_at   | PECAM1          | platelet and endothelial cell adhesion molecule 1                                  | -2,898 | 3,662 |
| 208982_at   | PECAM1          | platelet and endothelial cell adhesion molecule 1                                  | -2,121 | 2,782 |
| 208983_s_at | PECAM1          | platelet and endothelial cell adhesion molecule 1                                  | -2,828 | 3,507 |
| 208999_at   | SEPT8           | septin 8                                                                           | 3,647  | 5,341 |
| 209000_s_at | SEPT8           | septin 8                                                                           | 2,451  | 5,483 |
| 209019_s_at | PINK1           | PTEN induced putative kinase 1                                                     | -1,972 | 2,855 |
| 209029_at   | COP57A          | COP9 signalosome subunit 7A                                                        | -1,191 | 3,942 |
| 209040_s_at | PSMB8           | proteasome subunit beta 8                                                          | -2,121 | 5,477 |
| 209047_at   | AQP1            | aquaporin 1 (Colton blood group)                                                   | 1,691  | 4,139 |
| 209048_s_at | ZMYND8          | zinc finger MYND-type containing 8                                                 | 1,666  | 6,321 |
| 209049_s_at | ZMYND8          | zinc finger MYND-type containing 8                                                 | 1,487  | 8,877 |
| 209083_at   | CORO1A          | coronin 1A                                                                         | -5,843 | 6,921 |
| 209093_s_at | GBAP1///GBA     | glucosylceramidase beta pseudogene 1///glucosylceramidase beta                     | -2,192 | 3,569 |
| 209098_s_at | JAG1            | jagged 1                                                                           | -1,281 | 2,475 |
| 209108_at   | TSPAN6          | tetraspanin 6                                                                      | 2,07   | 6,539 |
| 209109_s_at | TSPAN6          | tetraspanin 6                                                                      | 2,408  | 4,614 |
| 209110_s_at | RGL2            | ral guanine nucleotide dissociation stimulator like 2                              | -3,212 | 3,801 |
| 209122_at   | PLIN2           | perilipin 2                                                                        | 3,436  | 4,58  |
| 209140_x_at | HLA-B           | major histocompatibility complex, class I, B                                       | -2,572 | 5,205 |
| 209148_at   | RXR8            | retinoid X receptor beta                                                           | -0,886 | 2,737 |
| 209155_s_at | NT5C2           | 5'-nucleotidase, cytosolic II                                                      | -2,005 | 5,41  |
| 209160_at   | AKR1C3          | aldo-keto reductase family 1, member C3                                            | 5,246  | 4,39  |
| 209166_s_at | MAN2B1          | mannosidase alpha class 2B member 1                                                | -1,746 | 4,101 |
| 209174_s_at | QRICH1          | glutamine rich 1                                                                   | 0,824  | 2,446 |
| 209184_s_at | IRS2            | insulin receptor substrate 2                                                       | -1,925 | 3,605 |
| 209185_s_at | IRS2            | insulin receptor substrate 2                                                       | -2,152 | 3,433 |
| 209200_at   | MEF2C           | myocyte enhancer factor 2C                                                         | 3,699  | 3,714 |
| 209201_x_at | CXCR4           | C-X-C motif chemokine receptor 4                                                   | -4,974 | 5,537 |
| 209211_at   | KLF5            | Kruppel like factor 5                                                              | -4,382 | 2,526 |
| 209214_s_at | EWSR1           | EWS RNA binding protein 1                                                          | 0,853  | 2,862 |
| 209238_at   | STX3            | syntaxin 3                                                                         | -5,88  | 4,271 |
| 209262_s_at | NR2F6           | nuclear receptor subfamily 2 group F member 6                                      | 1,064  | 3,234 |
| 209269_s_at | SYK             | spleen associated tyrosine kinase                                                  | -1,91  | 4,292 |
| 209273_s_at | ISCA1           | iron-sulfur cluster assembly 1                                                     | 1,279  | 2,822 |
| 209288_s_at | CDC42EP3        | CDC42 effector protein 3                                                           | -2,967 | 2,577 |
| 209296_at   | PPM1B           | protein phosphatase, Mg2+/Mn2+ dependent 1B                                        | -1,882 | 4,114 |
| 209301_at   | CA2             | carbonic anhydrase 2                                                               | 3,097  | 3,449 |
| 209304_x_at | GADD45B         | growth arrest and DNA damage inducible beta                                        | -2,756 | 4,709 |
| 209309_at   | AZGP1           | alpha-2-glycoprotein 1, zinc-binding                                               | 0,795  | 3,024 |
| 209314_s_at | HBS1L           | HBS1 like translational GTPase                                                     | 2,497  | 4,247 |
| 209316_s_at | HBS1L           | HBS1 like translational GTPase                                                     | 2,24   | 4,421 |
| 209331_s_at | MAX             | MYC associated factor X                                                            | -2,028 | 4,566 |
| 209332_s_at | MAX             | MYC associated factor X                                                            | -1,416 | 4,468 |
| 209337_at   | PSIP1           | PC4 and SFRS1 interacting protein 1                                                | 1,461  | 2,681 |
| 209339_at   | SIAH2           | siah E3 ubiquitin protein ligase 2                                                 | 0,993  | 3,59  |
| 209342_s_at | IKKBK           | inhibitor of kappa light polypeptide gene enhancer in B-cells, kinase beta         | -1,098 | 2,951 |
| 209369_at   | ANXA3           | annexin A3                                                                         | -7,634 | 6,632 |
| 209372_x_at | TUBB2B///TUBB2  | tubulin beta 2B class IIb///tubulin beta 2A class IIa                              | 1,576  | 3,94  |
| 209379_s_at | CCSER2          | coiled-coil serine rich protein 2                                                  | -2,017 | 4,252 |
| 209399_at   | HLCS            | holocarboxylase synthetase                                                         | 0,805  | 2,704 |
| 209406_at   | BAG2            | BCL2 associated athanogene 2                                                       | 2,569  | 2,727 |
| 209446_s_at |                 |                                                                                    | -3,972 | 4,295 |
| 209468_at   | LRP5            | LDL receptor related protein 5                                                     | 1,276  | 3,233 |
| 209473_at   | ENTPD1          | ectonucleoside triphosphate diphosphohydrolase 1                                   | -4,112 | 6,777 |
| 209474_s_at | ENTPD1          | ectonucleoside triphosphate diphosphohydrolase 1                                   | -4,638 | 6,153 |
| 209481_at   | SNRK            | SNF related kinase                                                                 | -2,051 | 3,759 |
| 209490_s_at | EGFL8///PPT2    | EGF like domain multiple 8///palmitoyl-protein thioesterase 2                      | 2,534  | 4,565 |
| 209491_s_at | CAND1.11///AMPI | uncharacterized LOC100130460///adenosine monophosphate deaminase 3                 | -2,297 | 2,733 |
| 209499_x_at | TNFSF12-TNFSF13 | TNFSF12-TNFSF13 readthrough///tumor necrosis factor superfamily member 13          | -3,211 | 6,354 |
| 209500_x_at | TNFSF12-TNFSF13 | TNFSF12-TNFSF13 readthrough///tumor necrosis factor superfamily member 13          | -2,952 | 8,38  |
| 209508_x_at | CFLAR           | CASP8 and FADD like apoptosis regulator                                            | -2,671 | 2,491 |
| 209514_s_at | RAB27A          | RAB27A, member RAS oncogene family                                                 | -3,931 | 6,835 |
| 209515_s_at | RAB27A          | RAB27A, member RAS oncogene family                                                 | -4,12  | 6,479 |
| 209516_at   | SMYD5           | SMYD family member 5                                                               | 1,412  | 2,946 |
| 209524_at   | HDGFRP3         | hepatoma-derived growth factor, related protein 3                                  | 2,302  | 2,892 |
| 209526_s_at | HDGFRP3         | hepatoma-derived growth factor, related protein 3                                  | 1,382  | 3,736 |
| 209539_at   | ARHGEF6         | Rac/Cdc42 guanine nucleotide exchange factor 6                                     | -1,802 | 4,92  |
| 209543_s_at | CD34            | CD34 molecule                                                                      | 1,511  | 2,599 |
| 209553_at   | VPS8            | VPS8, CORVET complex subunit                                                       | -1,542 | 3,387 |
| 209554_at   | CD36            | CD36 molecule                                                                      | 2,117  | 5,868 |
| 209555_s_at | CD36            | CD36 molecule                                                                      | 6,278  | 5,219 |
| 209576_at   | GNAI1           | G protein subunit alpha i1                                                         | 2,644  | 3,218 |
| 209585_s_at | MINPP1          | multiple inositol-polyphosphate phosphatase 1                                      | 4,986  | 3,399 |
| 209593_s_at | TOR1B           | torsin family 1 member B                                                           | -1,671 | 3,689 |
| 209605_at   | TST             | thiosulfate sulfurtransferase                                                      | 1,398  | 3,704 |
| 209615_s_at | PAK1            | p21 (RAC1) activated kinase 1                                                      | -2,968 | 3,078 |
| 209626_s_at | OSBPL3          | oxysterol binding protein like 3                                                   | 3,101  | 2,48  |
| 209627_s_at | OSBPL3          | oxysterol binding protein like 3                                                   | 2,842  | 4,235 |
| 209649_at   | STAM2           | signal transducing adaptor molecule 2                                              | -1,729 | 3,42  |
| 209665_at   | CYB561D2        | cytochrome b561 family member D2                                                   | -0,962 | 3,089 |
| 209676_at   | TFPI            | tissue factor pathway inhibitor                                                    | 2,958  | 5,838 |
| 209685_s_at | PRKCB           | protein kinase C beta                                                              | -3,247 | 5,977 |
| 209688_s_at | CCDC93          | coiled-coil domain containing 93                                                   | -1,204 | 3,495 |
| 209689_at   | CCDC93          | coiled-coil domain containing 93                                                   | -1,297 | 3,061 |
| 209699_x_at | LOC101930400/// | aldo-keto reductase family 1 member C2-like///aldo-keto reductase family 1, member | 3,848  | 7,254 |
| 209710_at   | GATA2           | GATA binding protein 2                                                             | 4,592  | 3,78  |
| 209716_at   | CSF1            | colony stimulating factor 1                                                        | 2,464  | 4,88  |
| 209721_s_at | IFFO1           | intermediate filament family orphan 1                                              | -1,674 | 5,305 |
| 209729_at   | GAS2L1          | growth arrest specific 2 like 1                                                    | 2,041  | 5,518 |
| 209731_at   | NTHL1           | nth like DNA glycosylase 1                                                         | 0,804  | 2,549 |
| 209734_at   | NCKAP1L         | NCK associated protein 1 like                                                      | -1,211 | 2,998 |
| 209735_at   | ABCG2           | ATP binding cassette subfamily G member 2 (Junior blood group)                     | 1,253  | 5,79  |
| 209740_s_at | PNPLA4          | patatin like phospholipase domain containing 4                                     | 1,697  | 2,997 |
| 209750_at   | NR1D2           | nuclear receptor subfamily 1 group D member 2                                      | 2,099  | 4,085 |
| 209764_at   | MGAT3           | mannosyl (beta-1,4-)-glycoprotein beta-1,4-N-acetylglucosaminyltransferase         | 2,35   | 5,487 |

|             |                  |                                                                                       |        |       |
|-------------|------------------|---------------------------------------------------------------------------------------|--------|-------|
| 209771_x_at | CD24             | CD24 molecule                                                                         | -5,606 | 3,045 |
| 209772_s_at | CD24             | CD24 molecule                                                                         | -5,216 | 2,622 |
| 209791_at   | PADI2            | peptidyl arginine deiminase 2                                                         | -6,298 | 6,583 |
| 209798_at   | NPAT             | nuclear protein, coactivator of histone transcription                                 | 1,35   | 4,533 |
| 209807_s_at | NFIX             | nuclear factor I X                                                                    | 1,47   | 4,333 |
| 209824_s_at | ARNTL            | aryl hydrocarbon receptor nuclear translocator like                                   | -3,059 | 2,697 |
| 209826_at   | PPT2-EGFL8///EGF | PPT2-EGFL8 readthrough (NMD candidate)///EGF like domain multiple 8///palmitoyl-γ     | 2,311  | 4,213 |
| 209827_s_at | IL16             | interleukin 16                                                                        | -4,196 | 4,694 |
| 209828_s_at | IL16             | interleukin 16                                                                        | -3,197 | 3,46  |
| 209837_at   | AP4M1            | adaptor related protein complex 4 mu 1 subunit                                        | 0,691  | 2,475 |
| 209841_s_at | LRRN3            | leucine rich repeat neuronal 3                                                        | 1,026  | 3,417 |
| 209869_at   | ADRA2A           | adrenoceptor alpha 2A                                                                 | 1,585  | 6,275 |
| 209870_s_at | APBA2            | amyloid beta precursor protein binding family A member 2                              | 0,911  | 2,548 |
| 209871_s_at | APBA2            | amyloid beta precursor protein binding family A member 2                              | 1,426  | 5,675 |
| 209876_at   | GIT2             | GIT ArfGAP 2                                                                          | -2,177 | 4,324 |
| 209894_at   | LEPROT///LEPR    | leptin receptor overlapping transcript///leptin receptor                              | 2,867  | 6,901 |
| 209901_x_at | AIF1             | allograft inflammatory factor 1                                                       | -3,929 | 3,959 |
| 209939_x_at | CFLAR            | CASP8 and FADD like apoptosis regulator                                               | -2,024 | 2,729 |
| 209949_at   | NCF2             | neutrophil cytosolic factor 2                                                         | -6,38  | 5,817 |
| 209962_at   | EPOR             | erythropoietin receptor                                                               | 1,895  | 2,669 |
| 209970_x_at | CASP1            | caspase 1                                                                             | -4,893 | 4,006 |
| 209975_at   | CYP2E1           | cytochrome P450 family 2 subfamily E member 1                                         | 3,077  | 7,726 |
| 209976_s_at | CYP2E1           | cytochrome P450 family 2 subfamily E member 1                                         | 2,018  | 6,953 |
| 210036_s_at | KCNH2            | potassium voltage-gated channel subfamily H member 2                                  | 4,206  | 6,322 |
| 210038_at   | PRKCQ            | protein kinase C theta                                                                | 2,589  | 3,299 |
| 210039_s_at | PRKCQ            | protein kinase C theta                                                                | 2,132  | 3,968 |
| 210042_s_at | CTSZ             | cathepsin Z                                                                           | -1,843 | 2,884 |
| 210047_at   | SLC11A2          | solute carrier family 11 member 2                                                     | 2,13   | 3,026 |
| 210054_at   | HAUS3            | HAUS augmin like complex subunit 3                                                    | 1,497  | 3,104 |
| 210073_at   | ST8SIA1          | ST8 alpha-N-acetyl-neuraminide alpha-2,8-sialyltransferase 1                          | 0,634  | 3,067 |
| 210088_x_at | MYL4             | myosin light chain 4                                                                  | 2,845  | 6,095 |
| 210092_at   | MAGOHB///MAGC    | mago homolog B, exon junction complex core component///mago homolog, exon jun         | 1,111  | 2,443 |
| 210117_at   | SPAG1            | sperm associated antigen 1                                                            | -3,321 | 3,444 |
| 210123_s_at | LOC101930361///  | uncharacterized LOC101930361///CHRNA7-FAM7A fusion protein///CHRNA7 (exons 5          | -0,84  | 2,466 |
| 210127_at   | RAB6B            | RAB6B, member RAS oncogene family                                                     | 1,485  | 5,168 |
| 210128_s_at | LTB4R            | leukotriene B4 receptor                                                               | -2,554 | 3,494 |
| 210129_s_at | ARPC4-TTL3///TT  | ARPC4-TTL3 readthrough///tubulin tyrosine ligase like 3///actin related protein 2/3 c | -1,984 | 2,797 |
| 210139_s_at | PMP22            | peripheral myelin protein 22                                                          | 4,184  | 5,324 |
| 210146_x_at | LILRB2           | leukocyte immunoglobulin like receptor B2                                             | -6,523 | 2,763 |
| 210148_at   | HIPK3            | homeodomain interacting protein kinase 3                                              | -1,313 | 3,082 |
| 210151_s_at | DYRK3            | dual specificity tyrosine phosphorylation regulated kinase 3                          | 1,354  | 2,581 |
| 210173_at   | PTPRJ            | protein tyrosine phosphatase, receptor type J                                         | -4,582 | 4,087 |
| 210176_at   | TLR1             | toll like receptor 1                                                                  | -4,067 | 2,563 |
| 210192_at   | ATP8A1           | ATPase phospholipid transporting 8A1                                                  | -3,343 | 4,251 |
| 210215_at   | TFR2             | transferrin receptor 2                                                                | 6,253  | 5,945 |
| 210218_s_at | SP100            | SP100 nuclear antigen                                                                 | -1,951 | 2,471 |
| 210223_s_at | MR1              | major histocompatibility complex, class I-related                                     | -1,384 | 4,234 |
| 210224_at   | MR1              | major histocompatibility complex, class I-related                                     | -1,027 | 3,03  |
| 210260_s_at | TNFAIP8          | TNF alpha induced protein 8                                                           | -1,473 | 2,74  |
| 210275_s_at | ZFAND5           | zinc finger AN1-type containing 5                                                     | -1,051 | 2,67  |
| 210280_at   | MPZ              | myelin protein zero                                                                   | -2,169 | 2,936 |
| 210290_at   | ZNF174           | zinc finger protein 174                                                               | 1,747  | 2,725 |
| 210298_x_at | FHL1             | four and a half LIM domains 1                                                         | 1,214  | 3,006 |
| 210314_x_at | TNFSF13          | tumor necrosis factor superfamily member 13                                           | -2,995 | 8,513 |
| 210340_s_at | CSF2RA           | colony stimulating factor 2 receptor alpha subunit                                    | -4,907 | 4,202 |
| 210358_x_at | GATA2            | GATA binding protein 2                                                                | 1,479  | 4,468 |
| 210359_at   | MTSS1            | metastasis suppressor 1                                                               | 2,93   | 7,995 |
| 210360_s_at | MTSS1            | metastasis suppressor 1                                                               | 4,155  | 9,555 |
| 210375_at   | PTGER3           | prostaglandin E receptor 3                                                            | 1,094  | 4,059 |
| 210395_x_at | MYL4             | myosin light chain 4                                                                  | 3,55   | 5,772 |
| 210414_at   | FLRT1            | fibronectin leucine rich transmembrane protein 1                                      | 1,098  | 2,685 |
| 210426_x_at | RORA             | RAR related orphan receptor A                                                         | 1,096  | 3,354 |
| 210430_x_at | RHD              | Rh blood group D antigen                                                              | 1,555  | 3,141 |
| 210444_at   | NPY6R            | neuropeptide Y receptor Y6 (pseudogene)                                               | 0,941  | 2,802 |
| 210446_at   | GATA1            | GATA binding protein 1                                                                | 2,495  | 8,052 |
| 210448_s_at | P2RX5            | purinergic receptor P2X 5                                                             | 4,327  | 7,307 |
| 210449_x_at | MAPK14           | mitogen-activated protein kinase 14                                                   | -2,294 | 3,034 |
| 210451_at   | PKLR             | pyruvate kinase, liver and RBC                                                        | 4,294  | 6,676 |
| 210452_x_at | CYP4F2           | cytochrome P450 family 4 subfamily F member 2                                         | -4,152 | 2,757 |
| 210456_at   | PCYT1B           | phosphate cytidylyltransferase 1, choline, beta                                       | 2,54   | 9,177 |
| 210457_x_at | HMGAI1           | high mobility group AT-hook 1                                                         | 1,871  | 2,452 |
| 210458_s_at | TANK             | TRAF family member associated NFKB activator                                          | -1,824 | 3,003 |
| 210479_s_at | RORA             | RAR related orphan receptor A                                                         | 1,403  | 3,616 |
| 210504_at   | KLF1             | Kruppel like factor 1                                                                 | 5,659  | 5,023 |
| 210514_x_at | HLA-G            | major histocompatibility complex, class I, G                                          | -1,951 | 3,002 |
| 210529_s_at | LOC100294033///  | protein FAM115A-like///TRPM8 channel associated factor 1                              | 1,938  | 2,893 |
| 210540_s_at | B4GALT4          | beta-1,4-galactosyltransferase 4                                                      | -2,023 | 2,736 |
| 210563_x_at | CFLAR            | CASP8 and FADD like apoptosis regulator                                               | -2,536 | 3,379 |
| 210564_x_at | CFLAR            | CASP8 and FADD like apoptosis regulator                                               | -2,811 | 3,268 |
| 210585_s_at | TNPO2            | transportin 2                                                                         | 0,928  | 2,581 |
| 210586_x_at | RHD              | Rh blood group D antigen                                                              | 1,634  | 3,203 |
| 210593_at   | ZSWIM8///SAT1    | zinc finger SWIM-type containing 8///spermidine/spermine N1-acetyltransferase 1       | -2,311 | 3,027 |
| 210629_x_at | LST1             | leukocyte specific transcript 1                                                       | -5,598 | 5,703 |
| 210647_x_at | PLA2G6           | phospholipase A2 group VI                                                             | 1,357  | 3,476 |
| 210664_s_at | TFPI             | tissue factor pathway inhibitor                                                       | 4,152  | 3,179 |
| 210665_at   | TFPI             | tissue factor pathway inhibitor                                                       | 2,437  | 7,625 |
| 210671_x_at | MAPK8            | mitogen-activated protein kinase 8                                                    | 0,974  | 2,592 |
| 210672_s_at | NPRL3            | NPR3 like, GATOR1 complex subunit                                                     | 2,186  | 2,678 |
| 210734_x_at | MAX              | MYC associated factor X                                                               | -1,864 | 3,757 |
| 210741_at   | ARHGEF12         | Rho guanine nucleotide exchange factor 12                                             | 1,008  | 2,553 |
| 210746_s_at | EPB42            | erythrocyte membrane protein band 4.2                                                 | 2,866  | 2,769 |
| 210758_at   | PSIP1            | PC4 and SFRS1 interacting protein 1                                                   | 1,046  | 3,422 |
| 210762_s_at | DLC1             | DLC1 Rho GTPase activating protein                                                    | 4,161  | 8,215 |
| 210776_x_at | TCF3             | transcription factor 3                                                                | 2,435  | 2,962 |
| 210785_s_at | THEMIS2          | thymocyte selection associated family member 2                                        | -2,941 | 2,996 |
| 210786_s_at | FLI1             | Fli-1 proto-oncogene, ETS transcription factor                                        | -2,798 | 7,019 |
| 210788_s_at | DHRS7            | dehydrogenase/reductase 7                                                             | -1,993 | 3,17  |
| 210812_at   | XRCC4            | X-ray repair cross complementing 4                                                    | -1,156 | 3,132 |
| 210813_s_at | XRCC4            | X-ray repair cross complementing 4                                                    | -0,948 | 3,488 |
| 210815_s_at | CALCRL           | calcitonin receptor like receptor                                                     | 0,843  | 2,931 |
| 210833_at   | PTGER3           | prostaglandin E receptor 3                                                            | 1,444  | 7,052 |
| 210834_s_at | PTGER3           | prostaglandin E receptor 3                                                            | 0,866  | 5,868 |

|             |                 |                                                                                    |        |       |
|-------------|-----------------|------------------------------------------------------------------------------------|--------|-------|
| 210844_x_at | CTNNA1          | catenin alpha 1                                                                    | 1,352  | 3,648 |
| 210847_x_at | TNFRSF25        | TNF receptor superfamily member 25                                                 | 1,043  | 2,767 |
| 210854_x_at | SLC6A8          | solute carrier family 6 member 8                                                   | 1,347  | 4,023 |
| 210868_s_at | ELOVL6          | ELOVL fatty acid elongase 6                                                        | 5,186  | 3,986 |
| 210871_x_at | SSX2IP          | SSX family member 2 interacting protein                                            | 2,139  | 3,795 |
| 210872_x_at | GAS7            | growth arrest specific 7                                                           | -3,544 | 4,545 |
| 210929_s_at | AHSG            | alpha 2-HS glycoprotein                                                            | 2,207  | 8,434 |
| 210933_s_at | FSCN1           | fascin actin-bundling protein 1                                                    | 3,461  | 2,872 |
| 210942_s_at | ST3GAL6         | ST3 beta-galactoside alpha-2,3-sialyltransferase 6                                 | -4,838 | 8,389 |
| 210943_s_at | LYST            | lysosomal trafficking regulator                                                    | -3,904 | 9,216 |
| 210944_s_at | CAPN3           | calpain 3                                                                          | -3,846 | 2,808 |
| 210948_s_at | LEF1            | lymphoid enhancer binding factor 1                                                 | 2,593  | 8,835 |
| 210951_x_at | RAB27A          | RAB27A, member RAS oncogene family                                                 | -3,926 | 6,747 |
| 210963_s_at | GYG2            | glycogenin 2                                                                       | 0,948  | 2,519 |
| 210976_s_at | PFKM            | phosphofructokinase, muscle                                                        | 3,69   | 4,186 |
| 210985_s_at | SP100           | SP100 nuclear antigen                                                              | -2,666 | 3,433 |
| 211003_x_at | TGM2            | transglutaminase 2                                                                 | 2,414  | 7,331 |
| 211004_s_at | ALDH3B1         | aldehyde dehydrogenase 3 family member B1                                          | -1,321 | 2,64  |
| 211020_at   | GCNT2           | glucosaminyl (N-acetyl) transferase 2, I-branching enzyme (I blood group)          | 1,811  | 3,339 |
| 211027_s_at | IKBKB           | inhibitor of kappa light polypeptide gene enhancer in B-cells, kinase beta         | -1,056 | 2,548 |
| 211067_s_at | GAS7            | growth arrest specific 7                                                           | -4,201 | 5,406 |
| 211071_s_at | MLLT11          | myeloid/lymphoid or mixed-lineage leukemia; translocated to, 11                    | 3,704  | 6,323 |
| 211087_x_at | MAPK14          | mitogen-activated protein kinase 14                                                | -2,16  | 2,791 |
| 211100_x_at | LILRA2          | leukocyte immunoglobulin like receptor A2                                          | -4,413 | 4,223 |
| 211101_x_at | LILRA2          | leukocyte immunoglobulin like receptor A2                                          | -4,296 | 3,915 |
| 211102_s_at | LILRA2          | leukocyte immunoglobulin like receptor A2                                          | -3,926 | 3,397 |
| 211121_s_at | DOK1            | docking protein 1                                                                  | -1,219 | 3,172 |
| 211160_x_at | ACTN1           | actinin alpha 1                                                                    | -1,911 | 3,263 |
| 211178_s_at | PSTPIP1         | proline-serine-threonine phosphatase interacting protein 1                         | -4,204 | 7,018 |
| 211186_s_at | AAK1            | AP2 associated kinase 1                                                            | -1,352 | 4,756 |
| 211213_at   | ORC5            | origin recognition complex subunit 5                                               | 0,958  | 2,58  |
| 211230_s_at | PIK3CD          | phosphatidylinositol-4,5-bisphosphate 3-kinase catalytic subunit delta             | -3,119 | 3,96  |
| 211240_x_at | TMX2-CTNND1///  | TMX2-CTNND1 readthrough (NMD candidate)///catenin delta 1                          | 1,846  | 4,642 |
| 211254_x_at | RHAG            | Rh-associated glycoprotein                                                         | 4,268  | 8,362 |
| 211256_x_at | BTN2A1          | butyrophilin subfamily 2 member A1                                                 | -2,059 | 2,754 |
| 211275_s_at | GYG1            | glycogenin 1                                                                       | -2,778 | 3,845 |
| 211284_s_at | GRN             | granulin                                                                           | -3,281 | 4,883 |
| 211317_s_at | CFLAR           | CASP8 and FADD like apoptosis regulator                                            | -3,09  | 3,241 |
| 211354_s_at | LEPROT///LEPR   | leptin receptor overlapping transcript///leptin receptor                           | 3,143  | 7,967 |
| 211355_x_at | LEPROT///LEPR   | leptin receptor overlapping transcript///leptin receptor                           | 3,869  | 8,059 |
| 211356_x_at | LEPROT///LEPR   | leptin receptor overlapping transcript///leptin receptor                           | 3,605  | 6,141 |
| 211366_x_at | CASP1           | caspase 1                                                                          | -4,594 | 3,75  |
| 211367_s_at | CASP1           | caspase 1                                                                          | -4,183 | 3,036 |
| 211368_s_at | CASP1           | caspase 1                                                                          | -5,191 | 4,28  |
| 211373_s_at | PSEN2           | presenilin 2                                                                       | 1,58   | 3,1   |
| 211379_x_at | B3GALNT1        | beta-1,3-N-acetylgalactosaminyltransferase 1 (globoside blood group)               | 2,744  | 3,76  |
| 211383_s_at | WDR37           | WD repeat domain 37                                                                | -1,271 | 3,011 |
| 211429_s_at | SERPINA1        | serpin family A member 1                                                           | -6,154 | 2,929 |
| 211458_s_at | GABARAPL3///GAI | GABA type A receptor associated protein like 3 pseudogene///GABA type A receptor a | -3,435 | 3,371 |
| 211464_x_at | CASP6           | caspase 6                                                                          | 1,673  | 3,848 |
| 211468_s_at | RECQL5          | RecQ like helicase 5                                                               | 0,885  | 4,386 |
| 211494_s_at | SLC4A4          | solute carrier family 4 member 4                                                   | 2,449  | 9,273 |
| 211495_x_at | TNFSF12-TNFSF13 | TNFSF12-TNFSF13 readthrough///tumor necrosis factor superfamily member 13          | -3,066 | 6,108 |
| 211504_x_at | ROCK2           | Rho associated coiled-coil containing protein kinase 2                             | 0,844  | 2,481 |
| 211528_x_at | HLA-G           | major histocompatibility complex, class I, G                                       | -2,572 | 4,612 |
| 211529_x_at | HLA-G           | major histocompatibility complex, class I, G                                       | -2,185 | 4,74  |
| 211530_x_at | HLA-G           | major histocompatibility complex, class I, G                                       | -1,629 | 3,092 |
| 211546_x_at | SNCA            | synuclein alpha                                                                    | 1,815  | 2,847 |
| 211553_x_at | APAF1           | apoptotic peptidase activating factor 1                                            | -2,329 | 2,839 |
| 211554_s_at | APAF1           | apoptotic peptidase activating factor 1                                            | -3,674 | 6,816 |
| 211555_s_at | GUCY1B3         | guanylate cyclase 1 soluble subunit beta                                           | 3,713  | 5,678 |
| 211561_x_at | MAPK14          | mitogen-activated protein kinase 14                                                | -2,269 | 3,034 |
| 211573_x_at | TGM2            | transglutaminase 2                                                                 | 2,292  | 8,49  |
| 211581_x_at | LST1            | leukocyte specific transcript 1                                                    | -5,072 | 5,393 |
| 211582_x_at | LST1            | leukocyte specific transcript 1                                                    | -5,67  | 6,134 |
| 211584_s_at | NPAT            | nuclear protein, coactivator of histone transcription                              | 1,324  | 3,788 |
| 211653_x_at | LOC101930400/// | aldo-keto reductase family 1 member C2-like///aldo-keto reductase family 1, member | 3,769  | 5,495 |
| 211658_at   | PRDX2           | peroxiredoxin 2                                                                    | 2,604  | 5,223 |
| 211668_s_at | PLAU            | plasminogen activator, urokinase                                                   | -1,347 | 3,488 |
| 211672_s_at | ARPC4-TTL3///AF | ARPC4-TTL3 readthrough///actin related protein 2/3 complex subunit 4               | -1,887 | 3,901 |
| 211690_at   | RP56            | ribosomal protein S6                                                               | 1,319  | 3,313 |
| 211695_x_at | MUC1            | mucin 1, cell surface associated                                                   | 2,268  | 6,944 |
| 211718_at   | MGC2889         | uncharacterized protein MGC2889                                                    | 1,016  | 3,48  |
| 211742_s_at | EVI2B           | ecotropic viral integration site 2B                                                | -5,278 | 4,62  |
| 211759_x_at | TBCB            | tubulin folding cofactor B                                                         | -1,379 | 2,931 |
| 211791_s_at | KCNAB2          | potassium voltage-gated channel subfamily A regulatory beta subunit 2              | -1,833 | 3,165 |
| 211794_at   | FYB             | FYN binding protein                                                                | -4,038 | 4,207 |
| 211795_s_at | FYB             | FYN binding protein                                                                | -4,225 | 5,38  |
| 211797_s_at | NFYC            | nuclear transcription factor Y subunit gamma                                       | -1,42  | 2,696 |
| 211799_x_at | HLA-C           | major histocompatibility complex, class I, C                                       | -1,64  | 2,652 |
| 211812_s_at | B3GALNT1        | beta-1,3-N-acetylgalactosaminyltransferase 1 (globoside blood group)               | 2,412  | 2,844 |
| 211816_x_at | FCAR            | Fc fragment of IgA receptor                                                        | -5,906 | 3,115 |
| 211819_s_at | SORBS1          | sorbin and SH3 domain containing 1                                                 | 1,924  | 6,814 |
| 211820_x_at | GYPA            | glycophorin A (MNS blood group)                                                    | 4,176  | 4,354 |
| 211821_x_at | GYPA            | glycophorin A (MNS blood group)                                                    | 4,725  | 4,169 |
| 211825_s_at | FLI1            | Fli-1 proto-oncogene, ETS transcription factor                                     | -2,895 | 4,979 |
| 211828_s_at | TNIK            | TRAF2 and NCK interacting kinase                                                   | 3,715  | 5,633 |
| 211839_s_at | CSF1            | colony stimulating factor 1                                                        | 1,638  | 2,807 |
| 211862_x_at | CFLAR           | CASP8 and FADD like apoptosis regulator                                            | -3,056 | 3,087 |
| 211890_x_at | CAPN3           | calpain 3                                                                          | -4,075 | 3,275 |
| 211911_x_at | HLA-B           | major histocompatibility complex, class I, B                                       | -2,677 | 3,858 |
| 211919_s_at | CXCR4           | C-X-C motif chemokine receptor 4                                                   | -5,202 | 5,911 |
| 211945_s_at | ITGB1           | integrin subunit beta 1                                                            | 2,049  | 3,015 |
| 211963_s_at | ARPC5           | actin related protein 2/3 complex subunit 5                                        | -2,288 | 3,849 |
| 211970_x_at | ACTG1///ACTB    | actin gamma 1///actin beta                                                         | -0,978 | 3,425 |
| 211974_x_at | RBPJ            | recombination signal binding protein for immunoglobulin kappa J region             | -1,043 | 2,86  |
| 211983_x_at | ACTG1///ACTB    | actin gamma 1///actin beta                                                         | -1,212 | 4,168 |
| 211995_x_at | ACTG1///ACTB    | actin gamma 1///actin beta                                                         | -1,3   | 2,603 |
| 212019_at   | RSL1D1          | ribosomal L1 domain containing 1                                                   | 1,275  | 2,659 |
| 212024_x_at | FLII            | FLII, actin remodeling protein                                                     | -1,51  | 3,966 |
| 212025_s_at | FLII            | FLII, actin remodeling protein                                                     | -1,464 | 2,531 |
| 212029_s_at | PTOV1-AS2       | PTOV1 antisense RNA 2                                                              | 1,093  | 3,438 |

|             |                |                                                                                        |        |        |
|-------------|----------------|----------------------------------------------------------------------------------------|--------|--------|
| 212070_at   | ADGRG1         | adhesion G protein-coupled receptor G1                                                 | 2,956  | 4,717  |
| 212071_s_at | SPTBN1         | spectrin beta, non-erythrocytic 1                                                      | -3,327 | 5,72   |
| 212074_at   | SUN1           | Sad1 and UNC84 domain containing 1                                                     | 3,347  | 4,209  |
| 212082_s_at | MYL6           | myosin light chain 6                                                                   | -1,062 | 3,27   |
| 212089_at   | LMNA           | lamin A/C                                                                              | 4,371  | 7,235  |
| 212098_at   | MGAT5          | mannosyl (alpha-1,6-)-glycoprotein beta-1,6-N-acetyl-glucosaminyltransferase           | -2,815 | 2,725  |
| 212105_s_at | DHX9           | DEAH-box helicase 9                                                                    | 1,624  | 2,743  |
| 212112_s_at | STX12          | syntaxin 12                                                                            | -1,322 | 2,576  |
| 212120_at   | RHOQ           | ras homolog family member Q                                                            | -2,724 | 3,367  |
| 212128_s_at | DAG1           | dystroglycan 1                                                                         | 1,617  | 6,007  |
| 212144_at   | SUN2           | Sad1 and UNC84 domain containing 2                                                     | -2,425 | 5,479  |
| 212148_at   | PBX1           | PBX homeobox 1                                                                         | 4,657  | 9,931  |
| 212151_at   | PBX1           | PBX homeobox 1                                                                         | 4,493  | 8,69   |
| 212156_at   | VPS39          | VPS39, HOPS complex subunit                                                            | -1,497 | 3,656  |
| 212177_at   | PNISR          | PNN interacting serine and arginine rich protein                                       | -1,132 | 2,935  |
| 212188_at   | KCTD12         | potassium channel tetramerization domain containing 12                                 | -4,223 | 4,144  |
| 212190_at   | SERPINE2       | serpin family E member 2                                                               | 4,994  | 4,712  |
| 212192_at   | KCTD12         | potassium channel tetramerization domain containing 12                                 | -4,807 | 5,047  |
| 212220_at   | PSME4          | proteasome activator subunit 4                                                         | 1,054  | 2,445  |
| 212224_at   | ALDH1A1        | aldehyde dehydrogenase 1 family member A1                                              | 5,139  | 4,297  |
| 212229_s_at | FBXO21         | F-box protein 21                                                                       | 1,771  | 2,459  |
| 212231_at   | FBXO21         | F-box protein 21                                                                       | 1,36   | 2,581  |
| 212242_at   | TUBA4A         | tubulin alpha 4a                                                                       | -3,238 | 4,84   |
| 212252_at   | CAMKK2         | calcium/calmodulin dependent protein kinase kinase 2                                   | -2,207 | 3,806  |
| 212268_at   | SERPINB1       | serpin family B member 1                                                               | -1,982 | 2,766  |
| 212285_s_at | AGRN           | agrin                                                                                  | 1,21   | 3,569  |
| 212288_at   | FNBP1          | formin binding protein 1                                                               | -2,415 | 6,067  |
| 212291_at   | HIPK1          | homeodomain interacting protein kinase 1                                               | -1,464 | 2,828  |
| 212334_at   | GNS            | glucosamine (N-acetyl)-6-sulfatase                                                     | -0,948 | 2,753  |
| 212335_at   | GNS            | glucosamine (N-acetyl)-6-sulfatase                                                     | -1,329 | 4,665  |
| 212338_at   | MYO1D          | myosin ID                                                                              | 2,243  | 6,881  |
| 212350_at   | TBC1D1         | TBC1 domain family member 1                                                            | -1,509 | 2,63   |
| 212355_at   | KHNYN          | KH and NYN domain containing                                                           | -1,822 | 4,809  |
| 212356_at   | KHNYN          | KH and NYN domain containing                                                           | -1,446 | 3,066  |
| 212359_s_at | ZSWIM8         | zinc finger SWIM-type containing 8                                                     | -1,738 | 2,481  |
| 212363_x_at | ACTG1///ACTB   | actin gamma 1///actin beta                                                             | -1,458 | 3,511  |
| 212408_at   | TOR1AIP1       | torsin 1A interacting protein 1                                                        | -1,842 | 7,517  |
| 212409_s_at | TOR1AIP1       | torsin 1A interacting protein 1                                                        | -1,705 | 4,404  |
| 212419_at   | ZCCHC24        | zinc finger CCHC-type containing 24                                                    | 1,307  | 3,371  |
| 212422_at   | PDCD11         | programmed cell death 11                                                               | 1,399  | 2,463  |
| 212423_at   | ZCCHC24        | zinc finger CCHC-type containing 24                                                    | 1,606  | 3,964  |
| 212445_s_at | NEDD4L         | neural precursor cell expressed, developmentally down-regulated 4-like, E3 ubiquitin f | 3,788  | 7,47   |
| 212448_at   | NEDD4L         | neural precursor cell expressed, developmentally down-regulated 4-like, E3 ubiquitin f | 3,403  | 7,432  |
| 212471_at   | AVL9           | AVL9 cell migration associated                                                         | -1,013 | 3,204  |
| 212477_at   | ACAP2          | ArfGAP with coiled-coil, ankyrin repeat and PH domains 2                               | -1,846 | 2,792  |
| 212501_at   | CEBPB          | CCAAT/enhancer binding protein beta                                                    | -3,632 | 3,907  |
| 212543_at   | AIM1           | absent in melanoma 1                                                                   | -3,665 | 6,524  |
| 212545_s_at | ZHX3           | zinc fingers and homeoboxes 3                                                          | 1,175  | 3,117  |
| 212552_at   | HPCAL1         | hippocalcin like 1                                                                     | -1,202 | 3,319  |
| 212558_at   | SPRY1          | sprouty RTK signaling antagonist 1                                                     | 3,526  | 2,507  |
| 212559_at   | PRKAR1B        | protein kinase cAMP-dependent type I regulatory subunit beta                           | 1,179  | 3,334  |
| 212560_at   | SORL1          | sortilin related receptor 1                                                            | -4,732 | 7,26   |
| 212561_at   | DENND5A        | DENN domain containing 5A                                                              | -2,431 | 3,295  |
| 212563_at   | MIR7112///BOP1 | microRNA 7112///block of proliferation 1                                               | 1,841  | 3,063  |
| 212570_at   | ENDOD1         | endonuclease domain containing 1                                                       | 2,693  | 5,232  |
| 212572_at   | STK38L         | serine/threonine kinase 38 like                                                        | -1,333 | 3,101  |
| 212573_at   | ENDOD1         | endonuclease domain containing 1                                                       | 3,089  | 4,799  |
| 212595_s_at | DAZAP2         | DAZ associated protein 2                                                               | -1,677 | 2,779  |
| 212602_at   | WDFY3          | WD repeat and FYVE domain containing 3                                                 | -5,083 | 3,681  |
| 212658_at   | LHFPL2         | lipoma HMGIC fusion partner-like 2                                                     | 1,934  | 2,587  |
| 212664_at   | TUBB4A         | tubulin beta 4A class IVa                                                              | 1,155  | 3,658  |
| 212669_at   | CAMK2G         | calcium/calmodulin dependent protein kinase II gamma                                   | -2,254 | 3,09   |
| 212701_at   | TLN2           | talin 2                                                                                | 1,343  | 2,96   |
| 212715_s_at | MICAL3         | microtubule associated monooxygenase, calponin and LIM domain containing 3             | 2,314  | 2,643  |
| 212729_at   | DLG3           | discs large MAGUK scaffold protein 3                                                   | 1,038  | 3,431  |
| 212741_at   | MAOA           | monoamine oxidase A                                                                    | 2,271  | 5,057  |
| 212748_at   | MKL1           | megakaryoblastic leukemia (translocation) 1                                            | -2,411 | 3,411  |
| 212757_s_at | CAMK2G         | calcium/calmodulin dependent protein kinase II gamma                                   | -2,482 | 3,397  |
| 212761_at   | TCF7L2         | transcription factor 7 like 2                                                          | -1,881 | 3,364  |
| 212771_at   | FAM171A1       | family with sequence similarity 171 member A1                                          | 2,972  | 12,637 |
| 212777_at   | SOS1           | SOS Ras/Rac guanine nucleotide exchange factor 1                                       | 0,892  | 2,942  |
| 212794_s_at | KIAA1033       | KIAA1033                                                                               | -1,727 | 2,678  |
| 212795_at   | KIAA1033       | KIAA1033                                                                               | -1,789 | 3,272  |
| 212796_s_at | TBC1D28        | TBC1 domain family member 28                                                           | -2,284 | 5,108  |
| 212807_s_at | SORT1          | sortilin 1                                                                             | -4,453 | 3,78   |
| 212812_at   | SERINC5        | serine incorporator 5                                                                  | 1,293  | 2,797  |
| 212820_at   | DMXL2          | Dmx like 2                                                                             | -4,442 | 9,928  |
| 212829_at   | PIP4K2A        | phosphatidylinositol-5-phosphate 4-kinase type 2 alpha                                 | 1,058  | 2,898  |
| 212839_s_at | TROVE2         | TROVE domain family member 2                                                           | 0,887  | 2,493  |
| 212852_s_at | TROVE2         | TROVE domain family member 2                                                           | 0,808  | 2,65   |
| 212865_s_at | COL14A1        | collagen type XIV alpha 1 chain                                                        | 1,265  | 6,146  |
| 212873_at   | ARHGAP45       | Rho GTPase activating protein 45                                                       | -2,99  | 3,923  |
| 212889_x_at | GADD45GIP1     | GADD45G interacting protein 1                                                          | 1,271  | 3,537  |
| 212890_at   | SLC38A10       | solute carrier family 38 member 10                                                     | -1,266 | 2,649  |
| 212895_s_at | ABR            | active BCR-related                                                                     | -1,739 | 4,343  |
| 212912_at   | RPS6KA2        | ribosomal protein S6 kinase A2                                                         | -4,773 | 3,056  |
| 212946_at   | VWA8           | von Willebrand factor A domain containing 8                                            | 2,603  | 3,235  |
| 212974_at   | DENND3         | DENN domain containing 3                                                               | -3,285 | 3,297  |
| 212975_at   | DENND3         | DENN domain containing 3                                                               | -3,195 | 3,528  |
| 212988_x_at | ACTG1///ACTB   | actin gamma 1///actin beta                                                             | -1,02  | 3,325  |
| 213002_at   | MARCKS         | myristoylated alanine rich protein kinase C substrate                                  | -3,766 | 9,683  |
| 213003_s_at | SPIDR          | scaffolding protein involved in DNA repair                                             | -4,009 | 5,702  |
| 213006_at   | CEBPD          | CCAAT/enhancer binding protein delta                                                   | -3,889 | 4,421  |
| 213036_x_at | ATP2A3         | ATPase sarcoplasmic/endoplasmic reticulum Ca2+ transporting 3                          | -2,531 | 5,103  |
| 213039_at   | ARHGEF18       | Rho/Rac guanine nucleotide exchange factor 18                                          | -1,814 | 5,724  |
| 213067_at   | MYH10          | myosin, heavy chain 10, non-muscle                                                     | 4,218  | 7,184  |
| 213070_at   | PIK3C2A        | phosphatidylinositol-4-phosphate 3-kinase catalytic subunit type 2 alpha               | 1,213  | 3,6    |
| 213095_x_at | AIF1           | allograft inflammatory factor 1                                                        | -3,338 | 3,096  |
| 213099_at   | ANGEL1         | angel homolog 1                                                                        | 1,678  | 2,457  |
| 213101_s_at | ACTR3          | ARP3 actin related protein 3 homolog                                                   | -1,043 | 2,81   |
| 213102_at   | ACTR3          | ARP3 actin related protein 3 homolog                                                   | -1,491 | 4,323  |
| 213106_at   | ATP8A1         | ATPase phospholipid transporting 8A1                                                   | -2,49  | 2,838  |

|             |                 |                                                                                         |        |       |
|-------------|-----------------|-----------------------------------------------------------------------------------------|--------|-------|
| 213107_at   | TNIK            | TRAF2 and NCK interacting kinase                                                        | 3,231  | 5,011 |
| 213109_at   | TNIK            | TRAF2 and NCK interacting kinase                                                        | 2,82   | 6,194 |
| 213119_at   | SLC36A1         | solute carrier family 36 member 1                                                       | -1,244 | 2,453 |
| 213147_at   | HOXA10          | homeobox A10                                                                            | 1,509  | 2,728 |
| 213159_at   | PCNX1           | pecanex homolog 1 (Drosophila)                                                          | -2,397 | 3,315 |
| 213160_at   | DOCK2           | dedicator of cytokinesis 2                                                              | -1,781 | 4,441 |
| 213167_s_at | SLC5A3          | solute carrier family 5 member 3                                                        | 1,722  | 2,92  |
| 213194_at   | ROBO1           | roundabout guidance receptor 1                                                          | 2,148  | 5,828 |
| 213198_at   | ACVR1B          | activin A receptor type 1B                                                              | -3,694 | 7,563 |
| 213212_x_at | LOC102724093/// | golgin subfamily A member 6-like protein 4///golgin A6 family-like 4///golgin A6 family | 2,53   | 3,641 |
| 213214_x_at | ACTG1///ACTB    | actin gamma 1///actin beta                                                              | -1,041 | 3,792 |
| 213224_s_at | BBIP1           | BBSome interacting protein 1                                                            | 1,188  | 2,796 |
| 213232_at   | FAM234B         | family with sequence similarity 234 member B                                            | 1,201  | 2,541 |
| 213234_at   | FAM234B         | family with sequence similarity 234 member B                                            | 2,684  | 2,452 |
| 213248_at   | LOC730101       | uncharacterized LOC730101                                                               | 2,647  | 7,902 |
| 213252_at   | SH3PXD2A        | SH3 and PX domains 2A                                                                   | 1,944  | 5,831 |
| 213258_at   | TFPI            | tissue factor pathway inhibitor                                                         | 3,677  | 3,396 |
| 213280_at   | RAP1GAP2        | RAP1 GTPase activating protein 2                                                        | -3,19  | 4,097 |
| 213283_s_at | SALL2           | spalt like transcription factor 2                                                       | 1,267  | 2,496 |
| 213295_at   | CYLD            | CYLD lysine 63 deubiquitinase                                                           | -2,252 | 3,21  |
| 213309_at   | PLCL2           | phospholipase C like 2                                                                  | -2,944 | 3,444 |
| 213310_at   | CASC7///AGO2    | cancer susceptibility candidate 7 (non-protein coding)///argonaute 2, RISC catalytic co | 1,733  | 3,262 |
| 213320_at   | PRMT3           | protein arginine methyltransferase 3                                                    | 2,399  | 2,702 |
| 213323_s_at | ZC3H7B          | zinc finger CCCH-type containing 7B                                                     | 1,177  | 3,008 |
| 213335_s_at | ST3GAL6         | ST3 beta-galactoside alpha-2,3-sialyltransferase 6                                      | -1,346 | 2,498 |
| 213355_at   | ST3GAL6         | ST3 beta-galactoside alpha-2,3-sialyltransferase 6                                      | -3,899 | 8,391 |
| 213358_at   | MTCL1           | microtubule crosslinking factor 1                                                       | 1,643  | 5,641 |
| 213361_at   | TDRD7           | tudor domain containing 7                                                               | -2,795 | 8,402 |
| 213367_at   | LOC155060       | A1894139 pseudogene                                                                     | 0,818  | 2,853 |
| 213385_at   | CHN2            | chimerin 2                                                                              | 1,474  | 2,706 |
| 213386_at   | TMEM246         | transmembrane protein 246                                                               | 3,141  | 9,391 |
| 213393_at   | MFSD9           | major facilitator superfamily domain containing 9                                       | -1,802 | 2,563 |
| 213407_at   | PHLPP2          | PH domain and leucine rich repeat protein phosphatase 2                                 | 2,031  | 6,694 |
| 213415_at   | CLIC2           | chloride intracellular channel 2                                                        | 1,808  | 3,1   |
| 213424_at   | KIAA0895        | KIAA0895                                                                                | 1,053  | 3,686 |
| 213434_at   | STX2            | syntaxin 2                                                                              | 2,319  | 3,926 |
| 213440_at   | RAB1A           | RAB1A, member RAS oncogene family                                                       | -1,24  | 3,505 |
| 213447_at   | LOC101930404/// | SNORD116-28///SNORD115-26///SNORD115-13///SNORD115-7///SNORD116-22///SN                 | 1,744  | 5,865 |
| 213451_x_at | TNXB///TNXA     | tenascin XB///tenascin XA (pseudogene)                                                  | 1,264  | 3,392 |
| 213457_at   | MFHAS1          | malignant fibrous histiocytoma amplified sequence 1                                     | 3,74   | 3,83  |
| 213475_s_at | ITGAL           | integrin subunit alpha L                                                                | -5,161 | 4,932 |
| 213484_at   | ADD2            | adducin 2                                                                               | 1,809  | 7,031 |
| 213513_x_at | ARPC2           | actin related protein 2/3 complex subunit 2                                             | -2,129 | 7,165 |
| 213515_x_at | HBG2///HBG1     | hemoglobin subunit gamma 2///hemoglobin subunit gamma 1                                 | 3,773  | 3,298 |
| 213522_s_at | CSNK1D          | casein kinase 1 delta                                                                   | -3,321 | 2,982 |
| 213547_at   | CAND2           | cullin associated and neddylation dissociated 2 (putative)                              | 1,656  | 2,645 |
| 213549_at   | PDZD8           | PDZ domain containing 8                                                                 | 1,245  | 2,946 |
| 213553_x_at | APOC1           | apolipoprotein C1                                                                       | 4,533  | 7,952 |
| 213560_at   | GADD45B         | growth arrest and DNA damage inducible beta                                             | -3,755 | 5,816 |
| 213590_at   | SLC16A5         | solute carrier family 16 member 5                                                       | -2,334 | 3,394 |
| 213592_at   | APLNR           | apelin receptor                                                                         | 1,222  | 3,017 |
| 213595_s_at | CDC42BPA        | CDC42 binding protein kinase alpha                                                      | 3,922  | 5,108 |
| 213603_s_at | RAC2            | ras-related C3 botulinum toxin substrate 2 (rho family, small GTP binding protein Rac2  | -2,417 | 4,82  |
| 213617_s_at | TPGS2           | tubulin polyglutamylase complex subunit 2                                               | 3,205  | 2,729 |
| 213620_s_at | ICAM2           | intercellular adhesion molecule 2                                                       | 1,993  | 2,615 |
| 213650_at   | LOC101930583/// | uncharacterized LOC101930583///golgin A8 family member B///golgin A8 family mem         | 1,478  | 3,135 |
| 213663_s_at | FAM134B         | family with sequence similarity 134 member B                                            | -1,701 | 3,111 |
| 213692_s_at | VDR             | vitamin D (1,25- dihydroxyvitamin D3) receptor                                          | -2,555 | 2,867 |
| 213693_s_at | MUC1            | mucin 1, cell surface associated                                                        | 2,879  | 4,726 |
| 213697_at   | HIPK3           | homeodomain interacting protein kinase 3                                                | -1,382 | 2,679 |
| 213700_s_at | PKM             | pyruvate kinase, muscle                                                                 | -2,757 | 4,526 |
| 213730_x_at | TCF3            | transcription factor 3                                                                  | 2,75   | 3,348 |
| 213731_s_at | TCF3            | transcription factor 3                                                                  | 1,854  | 3,821 |
| 213733_at   | MYO1F           | myosin 1F                                                                               | -4,585 | 4,477 |
| 213746_s_at | FLNA            | filamin A                                                                               | -1,857 | 3,52  |
| 213753_x_at | EIF5A           | eukaryotic translation initiation factor 5A                                             | 1,167  | 3,046 |
| 213766_x_at | GNA11           | G protein subunit alpha 11                                                              | 1,43   | 6,265 |
| 213774_s_at | PPP1R2          | protein phosphatase 1 regulatory inhibitor subunit 2                                    | -1,699 | 2,63  |
| 213779_at   | EMID1           | EMI domain containing 1                                                                 | 1,803  | 2,45  |
| 213785_at   | IPO9            | importin 9                                                                              | 1,174  | 3,371 |
| 213786_at   | TAX1BP1         | Tax1 binding protein 1                                                                  | -1,348 | 3,465 |
| 213798_s_at | CAP1            | adenylate cyclase associated protein 1                                                  | -2,584 | 3,172 |
| 213809_x_at | TCF3            | transcription factor 3                                                                  | 1,665  | 2,916 |
| 213811_x_at | TCF3            | transcription factor 3                                                                  | 2,342  | 2,735 |
| 213817_at   | IRAK3           | interleukin 1 receptor associated kinase 3                                              | -2,74  | 4,601 |
| 213843_x_at | SLC6A8          | solute carrier family 6 member 8                                                        | 1,221  | 3,093 |
| 213844_at   | HOXA5           | homeobox A5                                                                             | 1,751  | 4,175 |
| 213858_at   | ZNF250          | zinc finger protein 250                                                                 | 1,044  | 3,645 |
| 213865_at   | DCBLD2          | discoidin, CUB and LCCL domain containing 2                                             | 2,583  | 3,091 |
| 213868_s_at | DHRS7           | dehydrogenase/reductase 7                                                               | -1,965 | 2,568 |
| 213873_at   | ST3GAL6         | ST3 beta-galactoside alpha-2,3-sialyltransferase 6                                      | 1,701  | 3,396 |
| 213899_at   | METAP2          | methionyl aminopeptidase 2                                                              | 2,246  | 4,556 |
| 213914_s_at | SPTBN1          | spectrin beta, non-erythrocytic 1                                                       | -3,071 | 5,909 |
| 213931_at   | ID2B///ID2      | inhibitor of DNA binding 2B, HLH protein (pseudogene)///inhibitor of DNA binding 2, t   | -3,318 | 2,565 |
| 213932_x_at | HLA-A           | major histocompatibility complex, class I, A                                            | -2,164 | 7,202 |
| 213933_at   | PTGER3          | prostaglandin E receptor 3                                                              | 0,874  | 3,858 |
| 213940_s_at | FNBP1           | formin binding protein 1                                                                | -1,955 | 4,653 |
| 213942_at   | MEGF6           | multiple EGF like domains 6                                                             | -0,906 | 2,572 |
| 213968_at   |                 |                                                                                         | 0,744  | 2,632 |
| 213975_s_at | LYZ             | lysozyme                                                                                | -4,267 | 7,824 |
| 214013_s_at | TBC1D1          | TBC1 domain family member 1                                                             | -2,329 | 3,238 |
| 214033_at   | LOC101930322/// | multidrug resistance-associated protein 6-like///ATP binding cassette subfamily C mer   | -1,236 | 2,51  |
| 214040_s_at | GSN             | gelsolin                                                                                | -1,48  | 2,863 |
| 214043_at   | PTPRD           | protein tyrosine phosphatase, receptor type D                                           | 2,062  | 4,332 |
| 214073_at   | CTTN            | cortactin                                                                               | 2,511  | 6,625 |
| 214074_s_at | CTTN            | cortactin                                                                               | 1,755  | 6,582 |
| 214110_s_at | LOC654342///LOC | lymphocyte-specific protein 1 pseudogene///lymphocyte-specific protein 1 pseudog        | 1,773  | 5,253 |
| 214137_at   | PTPRJ           | protein tyrosine phosphatase, receptor type J                                           | -4,166 | 3,173 |
| 214169_at   | SUN1            | Sad1 and UNC84 domain containing 1                                                      | 1,22   | 3,778 |
| 214181_x_at | LST1            | leukocyte specific transcript 1                                                         | -5,262 | 5,901 |
| 214193_s_at | DIEXF           | digestive organ expansion factor homolog (zebrafish)                                    | 3,377  | 3,175 |
| 214196_s_at | TPP1            | tripeptidyl peptidase 1                                                                 | -1,841 | 2,696 |

|             |                  |                                                                                      |        |        |
|-------------|------------------|--------------------------------------------------------------------------------------|--------|--------|
| 214231_s_at | VWA8             | von Willebrand factor A domain containing 8                                          | 2,301  | 3,205  |
| 214236_at   |                  |                                                                                      | 0,921  | 2,979  |
| 214240_at   | GAL              | galanin and GMAP prepeptide                                                          | 1,052  | 3,418  |
| 214244_s_at | ATP6V0E1         | ATPase H+ transporting V0 subunit e1                                                 | -1,082 | 2,717  |
| 214276_at   | KLF12            | Kruppel like factor 12                                                               | 2,82   | 3,954  |
| 214294_at   | KIAA0485         | uncharacterized LOC57235                                                             | 2,372  | 7,392  |
| 214295_at   | KIAA0485         | uncharacterized LOC57235                                                             | 3,935  | 5,424  |
| 214319_at   | FRY              | FRY microtubule binding protein                                                      | -1,935 | 2,72   |
| 214322_at   | CAMK2G           | calcium/calmodulin dependent protein kinase II gamma                                 | -2,321 | 3,028  |
| 214346_at   | C1QL1            | complement C1q like 1                                                                | 1,11   | 3,087  |
| 214365_at   | TPM3             | tropomyosin 3                                                                        | -2,311 | 4,307  |
| 214367_at   | RASGRP2          | RAS guanyl releasing protein 2                                                       | -1,662 | 4,788  |
| 214368_at   | RASGRP2          | RAS guanyl releasing protein 2                                                       | -1,339 | 4,625  |
| 214369_s_at | RASGRP2          | RAS guanyl releasing protein 2                                                       | -1,833 | 5,56   |
| 214370_at   | S100A8           | S100 calcium binding protein A8                                                      | -7,058 | 7,538  |
| 214378_at   | TFPI             | tissue factor pathway inhibitor                                                      | 1,505  | 4,086  |
| 214405_at   |                  |                                                                                      | -3,141 | 4,095  |
| 214407_x_at | GYPB             | glycophorin B (MNS blood group)                                                      | 3,597  | 4,606  |
| 214428_x_at | C4B_2///C4B///C4 | complement component 4B (Chido blood group), copy 2///complement component 4         | 2,256  | 7,289  |
| 214433_s_at | SELENBP1         | selenium binding protein 1                                                           | 2,152  | 4,479  |
| 214459_x_at | HLA-C            | major histocompatibility complex, class I, C                                         | -2,223 | 4,652  |
| 214464_at   | CDC42BPA         | CDC42 binding protein kinase alpha                                                   | 5,646  | 3,111  |
| 214470_at   | KLRB1            | killer cell lectin like receptor B1                                                  | 2,815  | 3,397  |
| 214475_x_at | CAPN3            | calpain 3                                                                            | -4,082 | 3,22   |
| 214482_at   | ZBTB25           | zinc finger and BTB domain containing 25                                             | 2,503  | 2,668  |
| 214484_s_at | SIGMAR1          | sigma non-opioid intracellular receptor 1                                            | 2,618  | 3,058  |
| 214500_at   | H2AFY            | H2A histone family member Y                                                          | -1,305 | 4,308  |
| 214504_at   | ABO              | ABO blood group (transferase A, alpha 1-3-N-acetylgalactosaminyltransferase; transfe | 1,006  | 3,018  |
| 214505_s_at | FHL1             | four and a half LIM domains 1                                                        | 1,686  | 2,549  |
| 214511_x_at | FCGR1B           | Fc fragment of IgG receptor Ib                                                       | -4,01  | 3,946  |
| 214519_s_at | RLN2             | relaxin 2                                                                            | 1,078  | 4,272  |
| 214574_x_at | LST1             | leukocyte specific transcript 1                                                      | -5,418 | 6,259  |
| 214581_x_at | TNFRSF21         | TNF receptor superfamily member 21                                                   | 3,822  | 4,65   |
| 214583_at   | DDI2///RSC1A1    | DNA damage inducible 1 homolog 2///regulatory solute carrier protein, family 1, mem  | 3,027  | 3,037  |
| 214606_at   | TSPAN2           | tetraspanin 2                                                                        | -3,917 | 2,833  |
| 214618_at   | CFLAR            | CASP8 and FADD like apoptosis regulator                                              | -2,339 | 3,245  |
| 214682_at   | PKD1P1           | polycystin 1, transient receptor potential channel interacting pseudogene 1          | 0,73   | 2,908  |
| 214684_at   | MEF2A            | myocyte enhancer factor 2A                                                           | -1,531 | 2,443  |
| 214688_at   | TLE4             | transducin like enhancer of split 4                                                  | -1,797 | 3,822  |
| 214700_x_at | RIF1             | replication timing regulatory factor 1                                               | 2,117  | 3,489  |
| 214703_s_at | MAN2B2           | mannosidase alpha class 2B member 2                                                  | -1,675 | 5,493  |
| 214718_at   | GATAD1           | GATA zinc finger domain containing 1                                                 | 0,729  | 2,56   |
| 214735_at   | IPCEF1           | interaction protein for cytohesin exchange factors 1                                 | -4,836 | 4,619  |
| 214752_x_at | FLNA             | filamin A                                                                            | -1,461 | 3,192  |
| 214753_at   | N4BP2L2          | NEDD4 binding protein 2 like 2                                                       | -1,473 | 3,517  |
| 214764_at   | RRP15            | ribosomal RNA processing 15 homolog                                                  | 3,426  | 2,622  |
| 214767_s_at | HSPB6            | heat shock protein family B (small) member 6                                         | 2,27   | 4,11   |
| 214769_at   | CLCN4            | chloride voltage-gated channel 4                                                     | 2,949  | 2,993  |
| 214783_s_at | ANXA11           | annexin A11                                                                          | -2,023 | 3,273  |
| 214795_at   | ZMYND8           | zinc finger MYND-type containing 8                                                   | 1,08   | 2,536  |
| 214813_at   | ZNF75D           | zinc finger protein 75D                                                              | -1,991 | 2,739  |
| 214834_at   | PWAR5            | Prader Willi/Angelman region RNA 5                                                   | 2,412  | 5,66   |
| 214856_at   | SPTBN1           | spectrin beta, non-erythrocytic 1                                                    | -2,025 | 3,467  |
| 214860_at   | SLC9A7           | solute carrier family 9 member A7                                                    | 1,842  | 3,693  |
| 214862_x_at | TET1             | tet methylcytosine dioxygenase 1                                                     | 1,681  | 7,151  |
| 214863_at   |                  |                                                                                      | 1,593  | 3,695  |
| 214866_at   | PLAUR            | plasminogen activator, urokinase receptor                                            | -3,236 | 2,556  |
| 214901_at   | ZNF8             | zinc finger protein 8                                                                | 1,166  | 2,523  |
| 214913_at   | ADAMTS3          | ADAM metallopeptidase with thrombospondin type 1 motif 3                             | 3,7    | 12,405 |
| 214925_s_at | SPTAN1           | spectrin alpha, non-erythrocytic 1                                                   | -1,989 | 4,187  |
| 214926_at   | SPTAN1           | spectrin alpha, non-erythrocytic 1                                                   | -1,521 | 4,635  |
| 214937_x_at | PCM1             | pericentriolar material 1                                                            | 1,358  | 2,531  |
| 214947_at   | FAM105A          | family with sequence similarity 105 member A                                         | -3,649 | 5,406  |
| 214949_at   |                  |                                                                                      | 1,855  | 3,118  |
| 214956_at   | AAK1             | AP2 associated kinase 1                                                              | -1,458 | 3,476  |
| 214977_at   |                  |                                                                                      | -4,512 | 5,008  |
| 214997_at   | SCAI             | suppressor of cancer cell invasion                                                   | 2,092  | 2,983  |
| 214998_at   | AAK1             | AP2 associated kinase 1                                                              | -1,783 | 2,957  |
| 215030_at   | GRSF1            | G-rich RNA sequence binding factor 1                                                 | 2,688  | 3,292  |
| 215044_s_at | STAM2            | signal transducing adaptor molecule 2                                                | -1,317 | 3,464  |
| 215047_at   | TRIM58           | tripartite motif containing 58                                                       | 2,664  | 10,338 |
| 215051_x_at | AIF1             | allograft inflammatory factor 1                                                      | -2,73  | 2,494  |
| 215054_at   | RLG3///EPOR      | ral guanine nucleotide dissociation stimulator like 3///erythropoietin receptor      | 2,224  | 4,88   |
| 215147_at   |                  |                                                                                      | -2,316 | 2,493  |
| 215154_at   | ULK2             | unc-51 like autophagy activating kinase 2                                            | 1,297  | 4,685  |
| 215163_at   |                  |                                                                                      | 1,156  | 3,133  |
| 215219_at   | DOPEY2           | dopey family member 2                                                                | -2,987 | 3,877  |
| 215235_at   | SPTAN1           | spectrin alpha, non-erythrocytic 1                                                   | -2,379 | 4,118  |
| 215260_s_at | TCF3             | transcription factor 3                                                               | 0,794  | 2,446  |
| 215284_at   |                  |                                                                                      | 2,008  | 5,312  |
| 215291_at   | MKL1             | megakaryoblastic leukemia (translocation) 1                                          | -2,058 | 2,444  |
| 215292_s_at | MKL1             | megakaryoblastic leukemia (translocation) 1                                          | -2,555 | 2,728  |
| 215296_at   | CDC42BPA         | CDC42 binding protein kinase alpha                                                   | 2,578  | 8,286  |
| 215313_x_at | HLA-A            | major histocompatibility complex, class I, A                                         | -2,9   | 8,417  |
| 215337_at   | MED24            | mediator complex subunit 24                                                          | 1,782  | 2,95   |
| 215343_at   | CCDC88C          | coiled-coil domain containing 88C                                                    | -3,414 | 3,322  |
| 215388_s_at | CFHR11///CFH     | complement factor H related 1///complement factor H                                  | 1,697  | 3,682  |
| 215399_s_at | OS9              | OS9, endoplasmic reticulum lectin                                                    | -1,767 | 6,737  |
| 215415_s_at | LYST             | lysosomal trafficking regulator                                                      | -3,808 | 9,3    |
| 215425_at   | BTG3             | BTG anti-proliferation factor 3                                                      | 2,208  | 3,978  |
| 215447_at   |                  |                                                                                      | 1,181  | 4,476  |
| 215471_s_at | MAP7             | microtubule associated protein 7                                                     | 2,651  | 3,865  |
| 215480_at   | KIAA0509         | uncharacterized LOC57242                                                             | -1,07  | 2,906  |
| 215490_at   | IBA57            | IBA57 homolog, iron-sulfur cluster assembly                                          | 0,777  | 2,461  |
| 215493_x_at | BTN2A1           | butyrophilin subfamily 2 member A1                                                   | -2,199 | 2,804  |
| 215517_at   | PYGO1            | pygopus family PHD finger 1                                                          | 1,182  | 5,07   |
| 215528_at   |                  |                                                                                      | -2,154 | 2,883  |
| 215532_x_at | ZNF492           | zinc finger protein 492                                                              | 1,609  | 4,364  |
| 215561_s_at | IL1R1            | interleukin 1 receptor type 1                                                        | -4,162 | 3,813  |
| 215610_at   |                  |                                                                                      | 1,327  | 2,826  |
| 215620_at   | RREB1            | ras responsive element binding protein 1                                             | 1,453  | 3,081  |
| 215633_x_at | LST1             | leukocyte specific transcript 1                                                      | -5,842 | 5,961  |

|             |                                                                                        |                                                                                       |        |        |
|-------------|----------------------------------------------------------------------------------------|---------------------------------------------------------------------------------------|--------|--------|
| 215640_at   | TBC1D2B                                                                                | TBC1 domain family member 2B                                                          | -1,471 | 2,525  |
| 215648_at   |                                                                                        |                                                                                       | 1,307  | 3,346  |
| 215663_at   | MBNL1                                                                                  | muscleblind like splicing regulator 1                                                 | -1,724 | 2,872  |
| 215695_s_at | GYG2                                                                                   | glycogenin 2                                                                          | 2,643  | 3,088  |
| 215706_x_at | ZYX                                                                                    | zyxin                                                                                 | -4,11  | 6,071  |
| 215719_x_at | FAS                                                                                    | Fas cell surface death receptor                                                       | -2,394 | 2,552  |
| 215761_at   | DMXL2                                                                                  | Dmx like 2                                                                            | -2,478 | 2,984  |
| 215770_at   | OR7E2P                                                                                 | olfactory receptor family 7 subfamily E member 2 pseudogene                           | 0,561  | 2,537  |
| 215785_s_at | CYFIP2                                                                                 | cytoplasmic FMR1 interacting protein 2                                                | -3,792 | 3,199  |
| 215792_s_at | DNAJC11                                                                                | DnaJ heat shock protein family (Hsp40) member C11                                     | 0,979  | 2,644  |
| 215811_at   |                                                                                        |                                                                                       | 1,893  | 2,939  |
| 215812_s_at | SLC6A10PB///SLC6A10PB                                                                  | solute carrier family 6 member 8 pseudogene///solute carrier family 6 member 10, ps   | 1,217  | 2,983  |
| 215813_s_at | PTGS1                                                                                  | prostaglandin-endoperoxide synthase 1                                                 | 2,218  | 3,81   |
| 215819_s_at | RHD///RHCE                                                                             | Rh blood group D antigen///Rh blood group CcEe antigens                               | 2,541  | 4,469  |
| 215848_at   | SCAPER                                                                                 | S-phase cyclin A associated protein in the ER                                         | -1,525 | 2,597  |
| 215878_at   | ITGB1                                                                                  | integrin subunit beta 1                                                               | 1,675  | 3,713  |
| 215879_at   | ITGB1                                                                                  | integrin subunit beta 1                                                               | 1,718  | 4,638  |
| 215918_s_at | SPTBN1                                                                                 | spectrin beta, non-erythrocytic 1                                                     | -2,851 | 5,049  |
| 215938_s_at | PLA2G6                                                                                 | phospholipase A2 group VI                                                             | 1,321  | 2,92   |
| 215968_at   |                                                                                        |                                                                                       | -2,216 | 2,663  |
| 215996_at   |                                                                                        |                                                                                       | -2,541 | 2,464  |
| 216035_x_at | TCF7L2                                                                                 | transcription factor 7 like 2                                                         | -1,578 | 2,895  |
| 216041_x_at | GRN                                                                                    | granulin                                                                              | -3,759 | 5,602  |
| 216042_at   | TNFRSF25                                                                               | TNF receptor superfamily member 25                                                    | 3,889  | 10,779 |
| 216048_s_at | RHOBTB3                                                                                | Rho related BTB domain containing 3                                                   | 4,234  | 2,898  |
| 216049_at   | RHOBTB3                                                                                | Rho related BTB domain containing 3                                                   | 1,108  | 2,535  |
| 216054_x_at | MYL4                                                                                   | myosin light chain 4                                                                  | 3,19   | 6,716  |
| 216063_at   | HBBP1                                                                                  | hemoglobin subunit beta pseudogene 1                                                  | 2,357  | 5,939  |
| 216072_at   | PRMT2                                                                                  | protein arginine methyltransferase 2                                                  | -2,368 | 3,087  |
| 216080_s_at | FADS3                                                                                  | fatty acid desaturase 3                                                               | 1,059  | 2,573  |
| 216085_at   | OBSN///DKFZP44                                                                         | obscurin, cytoskeletal calmodulin and titin-interacting RhoGEF///DKFZP434C153 prote   | 2,794  | 8,704  |
| 216090_x_at |                                                                                        |                                                                                       | -0,929 | 2,956  |
| 216100_s_at | TOR1AIP1                                                                               | torsin 1A interacting protein 1                                                       | -1,804 | 5,831  |
| 216158_at   |                                                                                        |                                                                                       | 1,893  | 4,612  |
| 216174_at   | HCRP1                                                                                  | hepatocellular carcinoma-related HCRP1                                                | -2,667 | 4,653  |
| 216176_at   | HCRP1                                                                                  | hepatocellular carcinoma-related HCRP1                                                | -3,257 | 4,412  |
| 216178_x_at | ITGB1                                                                                  | integrin subunit beta 1                                                               | 1,811  | 3,549  |
| 216190_x_at | ITGB1                                                                                  | integrin subunit beta 1                                                               | 1,791  | 3,188  |
| 216191_s_at | TRDV3                                                                                  | T cell receptor delta variable 3                                                      | 3,233  | 9,302  |
| 216193_at   |                                                                                        |                                                                                       | 1,413  | 2,758  |
| 216215_s_at | RBFOX2                                                                                 | RNA binding protein, fox-1 homolog 2                                                  | 1,319  | 4,209  |
| 216218_s_at | PLCL2                                                                                  | phospholipase C like 2                                                                | -3,192 | 3,305  |
| 216226_at   | TAF4B                                                                                  | TATA-box binding protein associated factor 4b                                         | 3,655  | 2,463  |
| 216231_s_at | B2M                                                                                    | beta-2-microglobulin                                                                  | -1,57  | 2,948  |
| 216240_at   | MIR1204///PVT1                                                                         | microRNA 1204///Pvt1 oncogene (non-protein coding)                                    | 0,896  | 3,082  |
| 216251_s_at | TTL12                                                                                  | tubulin tyrosine ligase like 12                                                       | 1,574  | 3,319  |
| 216253_s_at | PARVB                                                                                  | parvin beta                                                                           | 1,884  | 3,897  |
| 216317_x_at | RHD///RHCE                                                                             | Rh blood group D antigen///Rh blood group CcEe antigens                               | 1,628  | 4,032  |
| 216333_x_at | TNXB///TNXA                                                                            | tenascin XB///tenascin XA (pseudogene)                                                | 1,132  | 2,665  |
| 216350_s_at | ZNF10                                                                                  | zinc finger protein 10                                                                | 1,873  | 2,66   |
| 216379_x_at | CD24                                                                                   | CD24 molecule                                                                         | -6,092 | 3,171  |
| 216398_at   | GYPB                                                                                   | glycophorin B (MNS blood group)                                                       | 1,943  | 4,922  |
| 216422_at   |                                                                                        |                                                                                       | 1,257  | 2,7    |
| 216433_s_at | PRDM2                                                                                  | PR/SET domain 2                                                                       | -1,328 | 3,274  |
| 216438_s_at | TMSB4X                                                                                 | thymosin beta 4, X-linked                                                             | -2,774 | 8,107  |
| 216493_s_at | IGF2BP3                                                                                | insulin like growth factor 2 mRNA binding protein 3                                   | -2,838 | 2,51   |
| 216526_x_at | HLA-C                                                                                  | major histocompatibility complex, class I, C                                          | -1,965 | 3,925  |
| 216564_at   |                                                                                        |                                                                                       | 1,474  | 3,051  |
| 216585_at   |                                                                                        |                                                                                       | 1,606  | 2,494  |
| 216594_x_at | AKR1C1                                                                                 | aldo-keto reductase family 1 member C1                                                | 3,346  | 6,16   |
| 216605_s_at | CEACAM21                                                                               | carcinoembryonic antigen related cell adhesion molecule 21                            | -3,878 | 2,542  |
| 216693_x_at | HDGFRP3                                                                                | hepatoma-derived growth factor, related protein 3                                     | 1,345  | 3,439  |
| 216716_at   | ABO                                                                                    | ABO blood group (transferase A, alpha 1-3-N-acetylgalactosaminyltransferase; transfe  | 3,151  | 6,706  |
| 216833_x_at | GYPB                                                                                   | glycophorin B (MNS blood group)                                                       | 2,197  | 4,471  |
| 216835_s_at | DOK1                                                                                   | docking protein 1                                                                     | -1,294 | 4,222  |
| 216850_at   | LOC101930404///SNORD116-28///SNORD115-26///SNORD115-13///SNORD115-7///SNORD116-22///SN |                                                                                       | 1,552  | 4,53   |
| 216860_s_at | GDF11                                                                                  | growth differentiation factor 11                                                      | 1,581  | 3,52   |
| 216865_at   | COL14A1                                                                                | collagen type XIV alpha 1 chain                                                       | 0,71   | 2,771  |
| 216866_s_at | COL14A1                                                                                | collagen type XIV alpha 1 chain                                                       | 0,756  | 2,635  |
| 216884_at   | PTPN12                                                                                 | protein tyrosine phosphatase, non-receptor type 12                                    | -2,339 | 3,268  |
| 216899_s_at | SKAP2                                                                                  | src kinase associated phosphoprotein 2                                                | -2,101 | 3,711  |
| 216915_s_at | PTPN12                                                                                 | protein tyrosine phosphatase, non-receptor type 12                                    | -2,122 | 2,848  |
| 216925_s_at | TAL1                                                                                   | TAL bHLH transcription factor 1, erythroid differentiation factor                     | 3,947  | 6,473  |
| 216928_at   | TAL1                                                                                   | TAL bHLH transcription factor 1, erythroid differentiation factor                     | 0,842  | 2,45   |
| 216929_x_at | ABO                                                                                    | ABO blood group (transferase A, alpha 1-3-N-acetylgalactosaminyltransferase; transfe  | 2,642  | 7,461  |
| 216940_x_at | YBX1                                                                                   | Y-box binding protein 1                                                               | 1,051  | 2,887  |
| 216947_at   | DES                                                                                    | desmin                                                                                | 1,341  | 2,451  |
| 216950_s_at | FCGR1CP///FCGR1C                                                                       | Fc fragment of IgG receptor 1c, pseudogene///Fc fragment of IgG receptor 1b///Fc frag | -2,87  | 2,918  |
| 216956_s_at | ITGA2B                                                                                 | integrin subunit alpha 2b                                                             | 2,158  | 5,218  |
| 216985_s_at | STX3                                                                                   | syntaxin 3                                                                            | -4,821 | 2,893  |
| 216994_s_at | RUNX2                                                                                  | runt related transcription factor 2                                                   | -1,832 | 3,552  |
| 216997_x_at | TLE4                                                                                   | transducin like enhancer of split 4                                                   | -3,51  | 5,357  |
| 217024_x_at |                                                                                        |                                                                                       | -4,305 | 5,161  |
| 217028_at   | CXCR4                                                                                  | C-X-C motif chemokine receptor 4                                                      | -4,136 | 8,053  |
| 217047_s_at | FAM13A                                                                                 | family with sequence similarity 13 member A                                           | 1,379  | 2,774  |
| 217080_s_at | HOMER2                                                                                 | homer scaffolding protein 2                                                           | 2,684  | 7,443  |
| 217107_at   |                                                                                        |                                                                                       | 0,67   | 2,562  |
| 217143_s_at | YME1L1                                                                                 | YME1 like 1 ATPase                                                                    | 1,764  | 4,867  |
| 217144_at   | UBBP1                                                                                  | ubiquitin B pseudogene 1                                                              | 1,422  | 2,81   |
| 217168_s_at | HERPUD1                                                                                | homocysteine inducible ER protein with ubiquitin like domain 1                        | -1,68  | 4,051  |
| 217257_at   | SH3BP2                                                                                 | SH3 domain binding protein 2                                                          | -2,592 | 2,446  |
| 217268_at   | RAB7A                                                                                  | RAB7A, member RAS oncogene family                                                     | -1,735 | 2,46   |
| 217274_x_at | MYL4                                                                                   | myosin light chain 4                                                                  | 1,925  | 4,775  |
| 217287_s_at | TRPC6                                                                                  | transient receptor potential cation channel subfamily C member 6                      | 0,979  | 3,435  |
| 217356_s_at | PGK1                                                                                   | phosphoglycerate kinase 1                                                             | -1,381 | 3,191  |
| 217367_s_at | ZHX3                                                                                   | zinc fingers and homeoboxes 3                                                         | 2,345  | 3,434  |
| 217383_at   | PGK1                                                                                   | phosphoglycerate kinase 1                                                             | -1,077 | 2,468  |
| 217389_s_at | ATF5                                                                                   | activating transcription factor 5                                                     | 0,827  | 2,488  |
| 217409_at   |                                                                                        |                                                                                       | -4,23  | 4,476  |
| 217436_x_at | HLA-J                                                                                  | major histocompatibility complex, class I, J (pseudogene)                             | -2,85  | 5,93   |
| 217456_x_at | HLA-E                                                                                  | major histocompatibility complex, class I, E                                          | -2,746 | 3,723  |
| 217465_at   | NCKAP1                                                                                 | NCK associated protein 1                                                              | 1,515  | 6,753  |

|             |                   |                                                                            |        |        |
|-------------|-------------------|----------------------------------------------------------------------------|--------|--------|
| 217472_at   |                   |                                                                            | 1,842  | 4,359  |
| 217489_s_at | IL6R              | interleukin 6 receptor                                                     | -4,587 | 4,394  |
| 217490_at   |                   |                                                                            | -1,105 | 2,74   |
| 217521_at   | HAL               | histidine ammonia-lyase                                                    | -2,883 | 3,877  |
| 217534_at   | FAM49B            | family with sequence similarity 49 member B                                | -3,499 | 2,728  |
| 217540_at   | NXPE3             | neurexophilin and PC-esterase domain family member 3                       | -2,506 | 3,604  |
| 217549_at   | NCKAP1L           | NCK associated protein 1 like                                              | -1,366 | 3,085  |
| 217597_x_at | RAB40B            | RAB40B, member RAS oncogene family                                         | 0,951  | 3,463  |
| 217603_at   | ATP6V0A2          | ATPase H+ transporting V0 subunit a2                                       | 1,959  | 4,98   |
| 217614_at   | ARHGAP45          | Rho GTPase activating protein 45                                           | -2,583 | 3,116  |
| 217617_at   |                   |                                                                            | 1,557  | 6,138  |
| 217623_at   | MYLK3             | myosin light chain kinase 3                                                | 1,372  | 3,741  |
| 217624_at   | PDAP1             | PDGFA associated protein 1                                                 | -2,914 | 4,272  |
| 217631_at   | GTPBP4            | GTP binding protein 4                                                      | 1,109  | 3,483  |
| 217633_at   | URB1              | URB1 ribosome biogenesis 1 homolog (S. cerevisiae)                         | 1,435  | 5,845  |
| 217643_x_at |                   |                                                                            | 2,7    | 6,757  |
| 217649_at   | ZFAND5            | zinc finger AN1-type containing 5                                          | -2,248 | 5,486  |
| 217692_at   | MAGOH2P           | mago homolog 2, pseudogene                                                 | 1,455  | 2,719  |
| 217709_at   |                   |                                                                            | 0,785  | 2,699  |
| 217711_at   | TEK               | TEK receptor tyrosine kinase                                               | 0,866  | 2,888  |
| 217712_at   |                   |                                                                            | 2,371  | 5,215  |
| 217743_s_at | TMEM30A           | transmembrane protein 30A                                                  | -1,692 | 5,506  |
| 217762_s_at | RAB31             | RAB31, member RAS oncogene family                                          | -7,43  | 10,416 |
| 217763_s_at | RAB31             | RAB31, member RAS oncogene family                                          | -6,151 | 8,26   |
| 217764_s_at | RAB31             | RAB31, member RAS oncogene family                                          | -7,103 | 9,558  |
| 217769_s_at | POMP              | proteasome maturation protein                                              | 1,004  | 4,292  |
| 217782_s_at | GPS1              | G protein pathway suppressor 1                                             | 0,898  | 3,238  |
| 217794_at   | PRR13             | proline rich 13                                                            | -1,459 | 2,612  |
| 217799_x_at | UBE2H             | ubiquitin conjugating enzyme E2 H                                          | -2,674 | 2,757  |
| 217800_s_at | NDFIP1            | Nedd4 family interacting protein 1                                         | 1,55   | 4,229  |
| 217811_at   | SELT              | selenoprotein T                                                            | -0,991 | 2,778  |
| 217817_at   | ARPC4             | actin related protein 2/3 complex subunit 4                                | -1,87  | 4,223  |
| 217818_s_at | ARPC4             | actin related protein 2/3 complex subunit 4                                | -1,421 | 3,528  |
| 217822_at   | WBP11             | VW domain binding protein 11                                               | 1,358  | 2,617  |
| 217835_x_at | TGIF2-C20orf24/// | TGIF2-C20orf24 readthrough///chromosome 20 open reading frame 24           | -1,614 | 3,383  |
| 217837_s_at | RNF103-CHMP3///   | RNF103-CHMP3 readthrough///charged multivesicular body protein 3           | -1,248 | 2,864  |
| 217841_s_at | PPME1             | protein phosphatase methylesterase 1                                       | 1,05   | 3,289  |
| 217845_x_at | HIGD1A            | HIG1 hypoxia inducible domain family member 1A                             | 1,613  | 5,893  |
| 217849_s_at | CDC42BPB          | CDC42 binding protein kinase beta                                          | 1,48   | 4,152  |
| 217862_at   | PIAS1             | protein inhibitor of activated STAT 1                                      | -1,724 | 3,686  |
| 217863_at   | PIAS1             | protein inhibitor of activated STAT 1                                      | -1,642 | 2,967  |
| 217864_s_at | PIAS1             | protein inhibitor of activated STAT 1                                      | -1,973 | 2,859  |
| 217878_s_at | CDC27             | cell division cycle 27                                                     | 1,036  | 2,807  |
| 217880_at   | CDC27             | cell division cycle 27                                                     | 1,344  | 2,778  |
| 217901_at   | DSG2              | desmoglein 2                                                               | 2,601  | 3,663  |
| 217906_at   | KLHDC2            | kelch domain containing 2                                                  | 0,949  | 2,493  |
| 217916_s_at | FAM49B            | family with sequence similarity 49 member B                                | -1,914 | 2,883  |
| 217924_at   | C6orf106          | chromosome 6 open reading frame 106                                        | 1,208  | 2,904  |
| 217931_at   | CNPY3             | canopy FGF signaling regulator 3                                           | -2,172 | 4,17   |
| 217947_at   | CMTM6             | CKL7 like MARVEL transmembrane domain containing 6                         | -2,365 | 3,779  |
| 217977_at   | MSRB1             | methionine sulfoxide reductase B1                                          | -5,651 | 5,203  |
| 217978_s_at | UBE2Q1            | ubiquitin conjugating enzyme E2 Q1                                         | -0,675 | 2,715  |
| 217983_s_at | RNASET2           | ribonuclease T2                                                            | -2,297 | 3,537  |
| 217984_at   | RNASET2           | ribonuclease T2                                                            | -2,032 | 3,256  |
| 217985_s_at | BAZ1A             | bromodomain adjacent to zinc finger domain 1A                              | -1,172 | 4,48   |
| 217986_s_at | BAZ1A             | bromodomain adjacent to zinc finger domain 1A                              | -0,806 | 3,14   |
| 217989_at   | HSD17B11          | hydroxysteroid 17-beta dehydrogenase 11                                    | -1,656 | 3,475  |
| 217991_x_at | SSBP3             | single stranded DNA binding protein 3                                      | 3,178  | 3,011  |
| 217992_s_at | EFHD2             | EF-hand domain family member D2                                            | -2,659 | 3,33   |
| 217995_at   | SQRDL             | sulfide quinone reductase-like (yeast)                                     | -3,779 | 5,552  |
| 218018_at   | PDXK              | pyridoxal (pyridoxine, vitamin B6) kinase                                  | -3,003 | 2,963  |
| 218043_s_at | AZI2              | 5-azacytidine induced 2                                                    | -1,681 | 2,712  |
| 218051_s_at | NTSDC2            | 5'-nucleotidase domain containing 2                                        | 1,897  | 2,494  |
| 218087_s_at | SORBS1            | sorbin and SH3 domain containing 1                                         | 3,477  | 11,082 |
| 218088_s_at | RRAGC             | Ras related GTP binding C                                                  | -1,171 | 3,744  |
| 218130_at   | C17orf62          | chromosome 17 open reading frame 62                                        | -1,758 | 2,823  |
| 218145_at   | TRIB3             | tribbles pseudokinase 3                                                    | -1,332 | 3,415  |
| 218154_at   | GSDMD             | gasdermin D                                                                | -1,038 | 2,495  |
| 218184_at   | TULP4             | tubby like protein 4                                                       | 3,054  | 2,881  |
| 218194_at   | REXO2             | RNA exonuclease 2                                                          | 4,713  | 2,51   |
| 218231_at   | NAGK              | N-acetylglucosamine kinase                                                 | -3,097 | 5,175  |
| 218251_at   | MID1IP1           | MID1 interacting protein 1                                                 | -2,141 | 3,179  |
| 218263_s_at | ZBED5             | zinc finger BED-type containing 5                                          | -0,975 | 2,565  |
| 218282_at   | EDEM2             | ER degradation enhancing alpha-mannosidase like protein 2                  | -1,258 | 4,388  |
| 218335_x_at | TNIP2             | TNFAIP3 interacting protein 2                                              | -0,981 | 3,858  |
| 218352_at   | RCBTB1            | RCC1 and BTB domain containing protein 1                                   | 1,662  | 2,554  |
| 218373_at   | AKTIP             | AKT interacting protein                                                    | -3,965 | 3,224  |
| 218376_s_at | MICAL1            | microtubule associated monooxygenase, calponin and LIM domain containing 1 | -4,756 | 7,208  |
| 218388_at   | PGLS              | 6-phosphogluconolactonase                                                  | -1,465 | 2,929  |
| 218404_at   | SNX10             | sorting nexin 10                                                           | -2,91  | 3,25   |
| 218412_s_at | GTF2IRD1          | GTF2I repeat domain containing 1                                           | 1,216  | 4,711  |
| 218413_s_at | ZNF639            | zinc finger protein 639                                                    | 1,692  | 2,673  |
| 218419_s_at | TMUB2             | transmembrane and ubiquitin like domain containing 2                       | -1,748 | 3,026  |
| 218421_at   | CERK              | ceramide kinase                                                            | -2,043 | 4,267  |
| 218450_at   | HEBP1             | heme binding protein 1                                                     | 2,718  | 2,912  |
| 218456_at   | CAPRIN2           | caprin family member 2                                                     | 3,153  | 7,839  |
| 218462_at   | RPF1              | ribosome production factor 1 homolog                                       | 0,982  | 2,864  |
| 218464_s_at | FAM222B           | family with sequence similarity 222 member B                               | 1,3    | 3,214  |
| 218486_at   | KLF11             | Kruppel like factor 11                                                     | 3,359  | 3,453  |
| 218489_s_at | ALAD              | aminolevulinate dehydratase                                                | 1,285  | 3,55   |
| 218498_s_at | ERO1A             | endoplasmic reticulum oxidoreductase 1 alpha                               | -1,284 | 2,589  |
| 218505_at   | WDR59             | WD repeat domain 59                                                        | 1,406  | 3,434  |
| 218510_x_at | FAM134B           | family with sequence similarity 134 member B                               | -1,597 | 3,222  |
| 218521_s_at | UBE2W             | ubiquitin conjugating enzyme E2 W (putative)                               | -2,309 | 7,05   |
| 218529_at   | CD320             | CD320 molecule                                                             | 1,255  | 3,845  |
| 218532_s_at | FAM134B           | family with sequence similarity 134 member B                               | -2,376 | 4,755  |
| 218544_s_at | RCL1              | RNA terminal phosphate cyclase like 1                                      | 2,105  | 3,331  |
| 218550_s_at | LRRC20            | leucine rich repeat containing 20                                          | 1,538  | 4,05   |
| 218618_s_at | LOC101928615///   | uncharacterized LOC101928615///fibronectin type III domain containing 3B   | -1,89  | 2,83   |
| 218627_at   | DRAM1             | DNA damage regulated autophagy modulator 1                                 | -1,216 | 4,16   |
| 218644_at   | PLEK2             | pleckstrin 2                                                               | 0,687  | 2,51   |
| 218653_at   | SLC25A15          | solute carrier family 25 member 15                                         | 4,168  | 3,583  |



|             |              |                                                                                     |        |       |
|-------------|--------------|-------------------------------------------------------------------------------------|--------|-------|
| 218656_s_at | LHFP         | lipoma HMGIC fusion partner                                                         | 2,899  | 7,175 |
| 218660_at   | DYSF         | dysferlin                                                                           | -6,187 | 4,625 |
| 218671_s_at | ATPIF1       | ATPase inhibitory factor 1                                                          | 1,341  | 2,678 |
| 218673_s_at | ATG7         | autophagy related 7                                                                 | -2,261 | 7,082 |
| 218699_at   | RAB29        | RAB29, member RAS oncogene family                                                   | -1,877 | 3,725 |
| 218700_s_at | RAB29        | RAB29, member RAS oncogene family                                                   | -1,711 | 3,072 |
| 218704_at   | RNF43        | ring finger protein 43                                                              | 0,921  | 3,157 |
| 218711_s_at | SDPR         | serum deprivation response                                                          | 1,696  | 4,669 |
| 218712_at   | C1orf109     | chromosome 1 open reading frame 109                                                 | 1,869  | 2,884 |
| 218728_s_at | CNIH4        | cornichon family AMPA receptor auxiliary protein 4                                  | -1,552 | 4,146 |
| 218729_at   | LXN          | latexin                                                                             | 2,278  | 3,386 |
| 218745_x_at | TMEM161A     | transmembrane protein 161A                                                          | 0,987  | 3,588 |
| 218749_s_at | SLC8B1       | solute carrier family 8 member B1                                                   | -1,679 | 4,239 |
| 218756_s_at | DHRS11       | dehydrogenase/reductase 11                                                          | 3,865  | 5,105 |
| 218785_s_at | IFT22        | intraflagellar transport 22                                                         | 1,015  | 2,775 |
| 218796_at   | FERMT1       | fermitin family member 1                                                            | 1,536  | 5,672 |
| 218800_at   | SRD5A3       | steroid 5 alpha-reductase 3                                                         | 2,187  | 3,295 |
| 218829_s_at | CHD7         | chromodomain helicase DNA binding protein 7                                         | -2,949 | 4,521 |
| 218840_s_at | NADSYN1      | NAD synthetase 1                                                                    | -1,469 | 3,54  |
| 218845_at   | DUSP22       | dual specificity phosphatase 22                                                     | -1,593 | 3,569 |
| 218852_at   | PPP2R3C      | protein phosphatase 2 regulatory subunit B"gamma                                    | -1,527 | 3,06  |
| 218856_at   | TNFRSF21     | TNF receptor superfamily member 21                                                  | 2,867  | 3,988 |
| 218858_at   | DEPTOR       | DEP domain containing MTOR-interacting protein                                      | 2,797  | 2,513 |
| 218865_at   | MARCKS       | mitochondrial amidoxime reducing component 1                                        | -5,365 | 7,535 |
| 218871_x_at | CSGALNACT2   | chondroitin sulfate N-acetylgalactosaminyltransferase 2                             | -2,971 | 4,85  |
| 218881_s_at | FOSL2        | FOS like 2, AP-1 transcription factor subunit                                       | -3,127 | 2,446 |
| 218887_at   | MRPL2        | mitochondrial ribosomal protein L2                                                  | 1,099  | 4,45  |
| 218901_at   | PLSCR4       | phospholipid scramblase 4                                                           | 2,946  | 2,907 |
| 218912_at   | GCC1         | GRIP and coiled-coil domain containing 1                                            | -1,245 | 2,872 |
| 218913_s_at | GMIP         | GEM interacting protein                                                             | -3,461 | 4,014 |
| 218950_at   | ARAP3        | ArfGAP with RhoGAP domain, ankyrin repeat and PH domain 3                           | -4,93  | 4,288 |
| 218956_s_at | ATP5J2-PTCD1 | ATP5J2-PTCD1 readthrough/pentatricopeptide repeat domain 1                          | 0,716  | 3,133 |
| 219031_s_at | NIP7         | NIP7, nucleolar pre-rRNA processing protein                                         | 2,146  | 2,456 |
| 219033_at   | PARP8        | poly(ADP-ribose) polymerase family member 8                                         | -3,915 | 5,072 |
| 219036_at   | CEP70        | centrosomal protein 70                                                              | 2,936  | 3,223 |
| 219039_at   | SEMA4C       | semaphorin 4C                                                                       | 2,438  | 5,159 |
| 219049_at   | CSGALNACT1   | chondroitin sulfate N-acetylgalactosaminyltransferase 1                             | -5,491 | 5,714 |
| 219054_at   | NPR3         | natriuretic peptide receptor 3                                                      | 4,302  | 5,497 |
| 219099_at   | TIGAR        | TP53 induced glycolysis regulatory phosphatase                                      | -3,474 | 5,158 |
| 219147_s_at | NMRK1        | nicotinamide riboside kinase 1                                                      | -1,76  | 2,53  |
| 219148_at   | PBK          | PDZ binding kinase                                                                  | 3,193  | 3,194 |
| 219190_s_at | AGO4         | argonaute 4, RISC catalytic component                                               | -2,788 | 5,028 |
| 219202_at   | RHBDF2       | rhomboid 5 homolog 2                                                                | -2,58  | 3,326 |
| 219229_at   | SLC3A1       | solute carrier organic anion transporter family member 3A1                          | -3,724 | 4,854 |
| 219233_s_at | GSDMB        | gasdermin B                                                                         | -1,458 | 4,301 |
| 219245_s_at | OGFOD2       | 2-oxoglutarate and iron dependent oxygenase domain containing 2                     | 0,762  | 3,189 |
| 219247_s_at | ZDHHC14      | zinc finger DHHC-type containing 14                                                 | 1,568  | 4,176 |
| 219252_s_at | GEMIN8       | gem nuclear organelle associated protein 8                                          | 1,372  | 2,557 |
| 219257_s_at | SPHK1        | sphingosine kinase 1                                                                | 0,96   | 3,255 |
| 219259_at   | SEMA4A       | semaphorin 4A                                                                       | -4,584 | 5,721 |
| 219281_at   | MSRA         | methionine sulfoxide reductase A                                                    | -2,289 | 3,505 |
| 219330_at   | VANGL1       | VANGL planar cell polarity protein 1                                                | 3,095  | 4,161 |
| 219355_at   | Cxorf57      | chromosome X open reading frame 57                                                  | 1,745  | 2,731 |
| 219361_s_at | AEN          | apoptosis enhancing nuclease                                                        | 1,012  | 3,726 |
| 219368_at   | NAP1L2       | nucleosome assembly protein 1 like 2                                                | 0,92   | 2,538 |
| 219412_at   | RAB38        | RAB38, member RAS oncogene family                                                   | 1,59   | 2,587 |
| 219415_at   | TTYH1        | tey family member 1                                                                 | 0,731  | 3,136 |
| 219417_s_at | BORCS6       | BLOC-1 related complex subunit 6                                                    | -0,952 | 3,748 |
| 219423_x_at | TNFRSF25     | TNF receptor superfamily member 25                                                  | 1,447  | 4,753 |
| 219441_s_at | LRRK1        | leucine rich repeat kinase 1                                                        | -1,833 | 3,619 |
| 219442_at   | CLUHP3       | clustered mitochondria homolog pseudogene 3                                         | 1,063  | 2,608 |
| 219500_at   | CLCF1        | cardiotrophin-like cytokine factor 1                                                | -0,827 | 2,616 |
| 219522_at   | FJX1         | four jointed box 1                                                                  | 2,101  | 6,547 |
| 219527_at   | MARCKS       | mitochondrial amidoxime reducing component 2                                        | -1,068 | 3,312 |
| 219558_at   | ATP13A3      | ATPase 13A3                                                                         | 2,329  | 2,974 |
| 219563_at   | SYNE3        | spectrin repeat containing nuclear envelope family member 3/long intergenic non-p   | -3,293 | 5,957 |
| 219587_at   | TTC12        | tetratricopeptide repeat domain 12                                                  | 1,025  | 2,649 |
| 219592_at   | MCPH1        | microcephalin 1                                                                     | 1,638  | 2,607 |
| 219594_at   | NINJ2        | ninjurin 2                                                                          | -3,222 | 6,005 |
| 219596_at   | THAP10       | THAP domain containing 10                                                           | 1,219  | 5,314 |
| 219606_at   | PHF20L1      | PHD finger protein 20-like 1                                                        | -1,875 | 2,576 |
| 219629_at   | FAM118A      | family with sequence similarity 118 member A                                        | 2,161  | 7,169 |
| 219664_s_at | DECR2        | 2,4-dienoyl-CoA reductase 2, peroxisomal                                            | 0,97   | 2,631 |
| 219666_at   | MS4A6A       | membrane spanning 4-domains A6A                                                     | -4,203 | 2,623 |
| 219672_at   | AHSP         | alpha hemoglobin stabilizing protein                                                | 5,084  | 4,752 |
| 219683_at   | FZD3         | frizzled class receptor 3                                                           | 1,287  | 4,213 |
| 219689_at   | SEMA3G       | semaphorin 3G                                                                       | 1,784  | 4,039 |
| 219694_at   | FAM105A      | family with sequence similarity 105 member A                                        | -4,566 | 7,663 |
| 219703_at   | MNS1         | meiosis specific nuclear structural 1                                               | 3,037  | 2,647 |
| 219704_at   | YBX2         | Y-box binding protein 2                                                             | 2,51   | 8,889 |
| 219708_at   | NTSM         | 5',3'-nucleotidase, mitochondrial                                                   | 0,661  | 3,116 |
| 219710_at   | SH3TC2       | SH3 domain and tetratricopeptide repeats 2                                          | 1,066  | 2,897 |
| 219723_x_at | AGPAT3       | 1-acylglycerol-3-phosphate O-acyltransferase 3                                      | 1,536  | 4,516 |
| 219724_s_at | TESPA1       | thymocyte expressed, positive selection associated 1                                | 2,09   | 3,689 |
| 219744_at   | FN3K         | fructosamine 3 kinase                                                               | 3,279  | 6,588 |
| 219789_at   | NPR3         | natriuretic peptide receptor 3                                                      | 4,189  | 4,852 |
| 219790_s_at | NPR3         | natriuretic peptide receptor 3                                                      | 3,251  | 5,385 |
| 219794_at   | VPS53        | VPS53, GARP complex subunit                                                         | -1,694 | 2,589 |
| 219797_at   | MGAT4A       | mannosyl (alpha-1,3-)-glycoprotein beta-1,4-N-acetylglucosaminyltransferase, isozym | -3,801 | 5,678 |
| 219799_s_at | DHRS9        | dehydrogenase/reductase 9                                                           | -5,345 | 3,394 |
| 219800_s_at | THNSL1       | threonine synthase like 1                                                           | 1,311  | 2,702 |
| 219837_s_at | CYTL1        | cytokine like 1                                                                     | 4,123  | 2,456 |
| 219890_at   | CLEC5A       | C-type lectin domain family 5 member A                                              | -5,875 | 5,574 |
| 219905_at   | ERMAP        | erythroblast membrane associated protein (Scianna blood group)                      | 1,304  | 3,333 |
| 219915_s_at | SLC16A10     | solute carrier family 16 member 10                                                  | 1,956  | 4,946 |
| 219930_at   | KLF8         | Kruppel like factor 8                                                               | 0,559  | 2,604 |
| 219956_at   | GALNT6       | polypeptide N-acetylgalactosaminyltransferase 6                                     | 4,186  | 2,545 |
| 219957_at   | RUFY2        | RUN and FYVE domain containing 2                                                    | -2,26  | 3,166 |
| 219970_at   | GIPC2        | GIPC PDZ domain containing family member 2                                          | 1,067  | 3,589 |
| 219976_at   | HOOK1        | hook microtubule tethering protein 1                                                | 4,908  | 6,337 |
| 219983_at   | HRASL5       | HRAS like suppressor                                                                | 1,429  | 4     |
| 220000_at   | SIGLEC5      | sialic acid binding Ig like lectin 5                                                | -6,782 | 4,998 |

|             |                 |                                                                                     |        |        |
|-------------|-----------------|-------------------------------------------------------------------------------------|--------|--------|
| 220005_at   | P2RY13          | purinergic receptor P2Y13                                                           | -4,5   | 2,67   |
| 220018_at   | CBLL1           | Cbl proto-oncogene like 1                                                           | 1,642  | 4,923  |
| 220022_at   | ZNF334          | zinc finger protein 334                                                             | 1,849  | 2,565  |
| 220027_s_at | RASIP1          | Ras interacting protein 1                                                           | 1,157  | 3,602  |
| 220028_at   | ACVR2B          | activin A receptor type 2B                                                          | 1,19   | 3,206  |
| 220030_at   | STYK1           | serine/threonine/tyrosine kinase 1                                                  | 1,031  | 2,992  |
| 220034_at   | IRAK3           | interleukin 1 receptor associated kinase 3                                          | -2,335 | 3,899  |
| 220089_at   | L2HGDH          | L-2-hydroxyglutarate dehydrogenase                                                  | 1,585  | 4,95   |
| 220115_s_at | CDH10           | cadherin 10                                                                         | 0,841  | 2,554  |
| 220117_at   | ZNF385D         | zinc finger protein 385D                                                            | 2,747  | 6,911  |
| 220120_s_at | EPB41L4A        | erythrocyte membrane protein band 4.1 like 4A                                       | 1,88   | 3,892  |
| 220122_at   | MCTP1           | multiple C2 and transmembrane domain containing 1                                   | -1,725 | 6,107  |
| 220124_at   | GAN             | gigaxonin                                                                           | 1,428  | 3,049  |
| 220144_s_at | ANKEF1          | ankyrin repeat and EF-hand domain containing 1                                      | 1,684  | 3,787  |
| 220145_at   | MAP9            | microtubule associated protein 9                                                    | 3,104  | 5,451  |
| 220152_at   | C10orf95        | chromosome 10 open reading frame 95                                                 | 0,754  | 2,54   |
| 220173_at   | BBOF1           | basal body orientation factor 1                                                     | 2,172  | 7,228  |
| 220215_at   | ZNF669          | zinc finger protein 669                                                             | 0,927  | 2,508  |
| 220219_s_at | LRRC37A2///LRRC | leucine rich repeat containing 37 member A2///leucine rich repeat containing 37 mem | -1,736 | 3,139  |
| 220220_at   | LRRC37A2///LRRC | leucine rich repeat containing 37 member A2///leucine rich repeat containing 37 mem | -2,473 | 3,512  |
| 220236_at   | PDPR            | pyruvate dehydrogenase phosphatase regulatory subunit                               | 1,885  | 2,729  |
| 220251_at   | DIEXF           | digestive organ expansion factor homolog (zebrafish)                                | 2,443  | 4,448  |
| 220252_x_at | CXorf21         | chromosome X open reading frame 21                                                  | -2,727 | 4,119  |
| 220254_at   | LRP12           | LDL receptor related protein 12                                                     | 1,735  | 3,203  |
| 220264_s_at | GPR107          | G protein-coupled receptor 107                                                      | -1,178 | 2,862  |
| 220310_at   | TUBAL3          | tubulin alpha like 3                                                                | 2,205  | 8,179  |
| 220311_at   | N6AMT1          | N-6 adenine-specific DNA methyltransferase 1 (putative)                             | 1,345  | 2,5    |
| 220346_at   | MTHFD2L         | methylenetetrahydrofolate dehydrogenase (NADP+ dependent) 2-like                    | 4,414  | 4,496  |
| 220363_s_at | ELMO2           | engulfment and cell motility 2                                                      | -1,674 | 3,381  |
| 220377_at   | FAM30A          | family with sequence similarity 30, member A                                        | 2,645  | 6,83   |
| 220384_at   | NME8            | NME/NM23 family member 8                                                            | -4,965 | 5,279  |
| 220387_s_at | HHLA3           | HERV-H LTR-associating 3                                                            | 2,366  | 4,391  |
| 220395_at   | DNAJA4          | DnaJ heat shock protein family (Hsp40) member A4                                    | 1,186  | 4,206  |
| 220416_at   | ATP8B4          | ATPase phospholipid transporting 8B4 (putative)                                     | -4,809 | 3,548  |
| 220418_at   | UBASH3A         | ubiquitin associated and SH3 domain containing A                                    | 1,819  | 6,174  |
| 220471_s_at | MYCT1           | myc target 1                                                                        | 2,765  | 8,207  |
| 220474_at   | SLC25A21        | solute carrier family 25 member 21                                                  | 4,457  | 13,017 |
| 220520_s_at | NUP62CL         | nucleoporin 62 C-terminal like                                                      | 4,156  | 7,091  |
| 220535_at   | FAM90A1         | family with sequence similarity 90 member A1                                        | 1,151  | 2,62   |
| 220602_s_at | LOC101929479/// | golgin subfamily A member 2///golgin A2 pseudogene///golgin A2 pseudogene///golg    | 1,571  | 6,462  |
| 220619_at   | CHD7            | chromodomain helicase DNA binding protein 7                                         | -2,739 | 3,915  |
| 220637_at   | FAM124B         | family with sequence similarity 124 member B                                        | 4,649  | 3,616  |
| 220668_s_at | DNMT3B          | DNA methyltransferase 3 beta                                                        | 1,362  | 3,198  |
| 220693_at   | CCDC82          | coiled-coil domain containing 82                                                    | -0,649 | 2,857  |
| 220710_at   | ANP32A-IT1      | ANP32A intronic transcript 1                                                        | -2,209 | 3,084  |
| 220712_at   | C8orf60         | chromosome 8 open reading frame 60                                                  | -2,475 | 2,528  |
| 220730_at   | LOC642533       | uncharacterized LOC642533                                                           | -1,212 | 2,623  |
| 220797_at   | LOC284009///ME1 | uncharacterized LOC284009///methyltransferase like 16                               | 2,152  | 2,496  |
| 220807_at   | HBQ1            | hemoglobin subunit theta 1                                                          | 1,031  | 2,613  |
| 220883_at   | PRO2012         | uncharacterized protein PRO2012                                                     | 3,383  | 7,266  |
| 220912_at   |                 |                                                                                     | 2,486  | 4,898  |
| 220938_s_at | GMEB1           | glucocorticoid modulatory element binding protein 1                                 | -1,017 | 2,856  |
| 220947_s_at | TBC1D10B        | TBC1 domain family member 10B                                                       | -1,412 | 3,356  |
| 220980_s_at | ADPGK           | ADP dependent glucokinase                                                           | -0,946 | 2,901  |
| 220994_s_at | STXBP6          | syntaxin binding protein 6                                                          | 1,293  | 3,662  |
| 220999_s_at | CYFIP2          | cytoplasmic FMR1 interacting protein 2                                              | -2,754 | 3,16   |
| 221002_s_at | TSPAN14         | tetraspanin 14                                                                      | -1,399 | 3,593  |
| 221006_s_at | SNX27           | sorting nexin family member 27                                                      | -2,492 | 3,702  |
| 221011_s_at | LBH             | limb bud and heart development                                                      | 4,008  | 5,3    |
| 221014_s_at | RAB33B          | RAB33B, member RAS oncogene family                                                  | -2,702 | 3,04   |
| 221021_s_at | CTNBNB1         | catenin beta like 1                                                                 | 1,759  | 2,638  |
| 221027_s_at | PLA2G12A        | phospholipase A2 group X1IA                                                         | 3,302  | 2,88   |
| 221030_s_at | ARHGAP24        | Rho GTPase activating protein 24                                                    | -3,713 | 2,471  |
| 221057_at   | SPATA1          | spermatogenesis associated 1                                                        | -1,996 | 2,795  |
| 221059_s_at | COTL1           | coactosin like F-actin binding protein 1                                            | -3,936 | 5,06   |
| 221060_s_at | TLR4            | toll like receptor 4                                                                | -5,106 | 5,535  |
| 221080_s_at | DENND1C         | DENN domain containing 1C                                                           | -2,847 | 4,309  |
| 221088_s_at | PPP1R9A         | protein phosphatase 1 regulatory subunit 9A                                         | 1,22   | 5,329  |
| 221188_s_at | CIDEB           | cell death-inducing DFFA-like effector b                                            | -0,901 | 3,13   |
| 221211_s_at | MAP3K7CL        | MAP3K7 C-terminal like                                                              | 1,027  | 3,724  |
| 221227_x_at | COQ3            | coenzyme Q3, methyltransferase                                                      | 2,139  | 2,596  |
| 221238_at   | HMGNS           | high mobility group nucleosome binding domain 5                                     | 1,08   | 2,692  |
| 221249_s_at | FAM117A         | family with sequence similarity 117 member A                                        | 1,556  | 4,093  |
| 221256_s_at | HDHD3           | haloacid dehalogenase like hydrolase domain containing 3                            | 1,591  | 4,674  |
| 221268_s_at | SGPP1           | sphingosine-1-phosphate phosphatase 1                                               | 2,887  | 3,6    |
| 221269_s_at | SH3BGR13        | SH3 domain binding glutamate rich protein like 3                                    | -2,771 | 2,955  |
| 221283_at   | RUNX2           | run related transcription factor 2                                                  | -1,478 | 2,817  |
| 221293_s_at | DEF6            | DEF6, guanine nucleotide exchange factor                                            | -1,74  | 2,669  |
| 221348_at   | NPPC            | natriuretic peptide C                                                               | 0,93   | 2,973  |
| 221430_s_at | RNF146          | ring finger protein 146                                                             | -2,053 | 4,27   |
| 221458_at   | HTR1F           | 5-hydroxytryptamine receptor 1F                                                     | 2,882  | 8,46   |
| 221484_at   | B4GALT5         | beta-1,4-galactosyltransferase 5                                                    | -3,486 | 6,359  |
| 221485_at   | B4GALT5         | beta-1,4-galactosyltransferase 5                                                    | -3,066 | 5,993  |
| 221497_x_at | EGLN1           | egl-9 family hypoxia inducible factor 1                                             | -2,91  | 3,957  |
| 221498_at   | SNX27           | sorting nexin family member 27                                                      | -2,108 | 3,18   |
| 221503_s_at | KPNA3           | karyopherin subunit alpha 3                                                         | 1,843  | 3,846  |
| 221506_s_at | TNPO2           | transportin 2                                                                       | 1,17   | 3,508  |
| 221522_at   | ANKRD27         | ankyrin repeat domain 27                                                            | 1,759  | 4,06   |
| 221523_s_at | RRAGD           | Ras related GTP binding D                                                           | -2,655 | 6,667  |
| 221524_s_at | RRAGD           | Ras related GTP binding D                                                           | -1,876 | 4,729  |
| 221528_s_at | ELMO2           | engulfment and cell motility 2                                                      | -2,015 | 4,589  |
| 221551_x_at | ST6GALNAC4      | ST6 N-acetylgalactosaminide alpha-2,6-sialyltransferase 4                           | 1,093  | 4,084  |
| 221558_s_at | LEF1            | lymphoid enhancer binding factor 1                                                  | 5,215  | 8,147  |
| 221581_s_at | LAT2            | linker for activation of T-cells family member 2                                    | -3,435 | 6,988  |
| 221582_at   | HIST3H2A        | histone cluster 3, H2a                                                              | 2,259  | 4,373  |
| 221586_s_at | E2F5            | E2F transcription factor 5                                                          | 2,59   | 6,844  |
| 221607_x_at | ACTG1///ACTB    | actin gamma 1///actin beta                                                          | -0,942 | 3,538  |
| 221648_s_at | AGMAT           | agmatinase                                                                          | 2,316  | 2,594  |
| 221666_s_at | PYCARD          | PYD and CARD domain containing                                                      | -2,862 | 7,008  |
| 221687_s_at | MVB12B          | multivesicular body subunit 12B                                                     | -3,783 | 5,554  |
| 221693_s_at | MRPS18A         | mitochondrial ribosomal protein S18A                                                | 1,268  | 2,518  |
| 221777_at   | RITA1           | RBPJ interacting and tubulin associated 1                                           | 0,887  | 2,854  |

|             |                 |                                                                                    |        |       |
|-------------|-----------------|------------------------------------------------------------------------------------|--------|-------|
| 221809_at   | RANBP10         | RAN binding protein 10                                                             | 1,088  | 2,489 |
| 221840_at   | PTPRE           | protein tyrosine phosphatase, receptor type E                                      | -4,184 | 3,385 |
| 221870_at   | EH2             | EH domain containing 2                                                             | 2,21   | 5,626 |
| 221875_x_at | HLA-F           | major histocompatibility complex, class I, F                                       | -3,418 | 5,221 |
| 221879_at   | CALML4          | calmodulin like 4                                                                  | -1,589 | 4,475 |
| 221884_at   | MECOM           | MDS1 and EVI1 complex locus                                                        | 1,369  | 3,542 |
| 221895_at   | MOSPD2          | motile sperm domain containing 2                                                   | -2,781 | 3,038 |
| 221896_s_at | HIGD1A          | HIG1 hypoxia inducible domain family member 1A                                     | 1,611  | 5,637 |
| 221903_s_at | CYLD            | CYLD lysine 63 deubiquitinase                                                      | -3,031 | 3,957 |
| 221905_at   | CYLD            | CYLD lysine 63 deubiquitinase                                                      | -2,196 | 3,288 |
| 221906_at   | TXNRD3NB//TXN   | thioredoxin reductase 3 neighbor//thioredoxin reductase 3                          | 1,231  | 3,022 |
| 221912_s_at | CCDC28B         | coiled-coil domain containing 28B                                                  | 1,83   | 5,231 |
| 221924_at   | ZMIZ2           | zinc finger MIZ-type containing 2                                                  | -1,166 | 2,809 |
| 221930_at   | PHF7            | PHD finger protein 7                                                               | 1,797  | 2,464 |
| 221942_s_at | GUCY1A3         | guanylate cyclase 1 soluble subunit alpha                                          | 3,449  | 3,227 |
| 221964_at   | TULP3           | tubby like protein 3                                                               | 0,692  | 2,549 |
| 221974_at   | LOC101930404//  | SNORD116-28//SNORD115-26//SNORD115-13//SNORD115-7//SNORD116-22//SN                 | 2,713  | 4,139 |
| 221981_s_at | WDR59           | WD repeat domain 59                                                                | 1,993  | 2,61  |
| 222001_x_at | LINC00623//LINC | long intergenic non-protein coding RNA 623//long intergenic non-protein coding RNA | -1,447 | 4,694 |
| 222013_x_at | EEF2KMT         | eukaryotic elongation factor 2 lysine methyltransferase                            | 1,413  | 3,574 |
| 222021_x_at | SDHAP2//SDHAP   | succinate dehydrogenase complex flavoprotein subunit A pseudogene 2//succinate d   | 1,128  | 2,587 |
| 222051_s_at | EZF5            | EZF transcription factor 5                                                         | 1,613  | 4,613 |
| 222065_s_at | FLII            | FLII, actin remodeling protein                                                     | -1,472 | 4,115 |
| 222071_s_at | SLC04C1         | solute carrier organic anion transporter family member 4C1                         | -5,059 | 5,265 |
| 222074_at   | UROD            | uroporphyrinogen decarboxylase                                                     | 1,933  | 5,612 |
| 222078_at   | PKLR            | pyruvate kinase, liver and RBC                                                     | 4,808  | 7,128 |
| 222094_at   | SLX1A-SULT1A3// | SLX1A-SULT1A3 readthrough (NMD candidate)//SLX1 homolog A, structure-specific e    | 1,049  | 3,56  |
| 222104_x_at | GTF2H3          | general transcription factor IIH subunit 3                                         | 1,028  | 2,541 |
| 222126_at   | AGFG2           | ArfGAP with FG repeats 2                                                           | 2,846  | 4,837 |
| 222129_at   | FAM134A         | family with sequence similarity 134 member A                                       | -0,894 | 3,173 |
| 222141_at   | KLHL22          | kelch like family member 22                                                        | -2     | 2,926 |
| 222162_s_at | ADAMTS1         | ADAM metalloproteinase with thrombospondin type 1 motif 1                          | 1,1    | 4,984 |
| 222173_s_at | TBC1D2          | TBC1 domain family member 2                                                        | -1,48  | 3,611 |
| 222180_at   |                 |                                                                                    | 0,944  | 4,178 |
| 222189_at   | AMBRA1          | autophagy and beclin 1 regulator 1                                                 | 0,818  | 2,86  |
| 222196_at   | LOC389906       | zinc finger protein 839 pseudogene                                                 | 2,115  | 4,387 |
| 222217_s_at | SLC27A3         | solute carrier family 27 member 3                                                  | -2,262 | 3,851 |
| 222235_s_at | CSGALNACT2      | chondroitin sulfate N-acetylgalactosaminyltransferase 2                            | -2,823 | 3,781 |
| 222240_s_at | ISYNA1          | inositol-3-phosphate synthase 1                                                    | 1,566  | 2,756 |
| 222249_at   |                 |                                                                                    | 1,444  | 2,52  |
| 222277_at   | C1QTNF9B-AS1    | C1QTNF9B antisense RNA 1                                                           | 1,969  | 4,648 |
| 222294_s_at | RAB27A          | RAB27A, member RAS oncogene family                                                 | -3,788 | 5,407 |
| 222315_at   | LOC100996756    | uncharacterized LOC100996756                                                       | -2,773 | 3,404 |
| 222339_x_at |                 |                                                                                    | 1,439  | 3,949 |
| 222348_at   | MAST4           | microtubule associated serine/threonine kinase family member 4                     | 1,668  | 2,61  |
| 222371_at   |                 |                                                                                    | -2,484 | 2,945 |
| 222376_at   |                 |                                                                                    | 2,039  | 6,252 |
| 222399_s_at | TM9SF3          | transmembrane 9 superfamily member 3                                               | 1,423  | 3,052 |
| 222420_s_at | UBE2H           | ubiquitin conjugating enzyme E2 H                                                  | -2,207 | 2,691 |
| 222421_at   | UBE2H           | ubiquitin conjugating enzyme E2 H                                                  | -2,952 | 3,871 |
| 222423_at   | NDFIP1          | Nedd4 family interacting protein 1                                                 | 2,069  | 4,403 |
| 222441_x_at | PRELID3B        | PRELI domain containing 3B                                                         | 1,287  | 3,119 |
| 222446_s_at | BACE2           | beta-site APP-cleaving enzyme 2                                                    | 1,945  | 3,862 |
| 222456_s_at | LIMA1           | LIM domain and actin binding 1                                                     | 3,039  | 6,874 |
| 222460_s_at | FAM192A         | family with sequence similarity 192 member A                                       | -1,02  | 2,855 |
| 222472_at   | AFTPH           | afthophilin                                                                        | -0,782 | 3,318 |
| 222482_at   | SSBP3           | single stranded DNA binding protein 3                                              | 3,149  | 3,085 |
| 222486_s_at | ADAMTS1         | ADAM metalloproteinase with thrombospondin type 1 motif 1                          | 1,385  | 4,901 |
| 222498_at   | AZI2            | 5-azacytidine induced 2                                                            | -1,392 | 2,534 |
| 222513_s_at | SORBS1          | sorbin and SH3 domain containing 1                                                 | 3,75   | 9,698 |
| 222514_at   | RRAGC           | Ras related GTP binding C                                                          | -0,975 | 3,169 |
| 222534_s_at | INF2            | inverted formin, FH2 and WH2 domain containing                                     | 2,037  | 6,873 |
| 222535_at   | INF2            | inverted formin, FH2 and WH2 domain containing                                     | 1,003  | 2,569 |
| 222570_at   | NCS1            | neuronal calcium sensor 1                                                          | 1,712  | 3,631 |
| 222573_s_at | SAV1            | salvador family WW domain containing protein 1                                     | 1,824  | 2,663 |
| 222581_at   | XPR1            | xenotropic and polytropic retrovirus receptor 1                                    | 1,281  | 3,135 |
| 222646_s_at | ERO1A           | endoplasmic reticulum oxidoreductase 1 alpha                                       | -1,688 | 3,18  |
| 222653_at   | PNPO            | pyridoxamine 5'-phosphate oxidase                                                  | 3,495  | 5,008 |
| 222656_at   | UBE2W           | ubiquitin conjugating enzyme E2 W (putative)                                       | -2,063 | 6,642 |
| 222657_s_at | UBE2W           | ubiquitin conjugating enzyme E2 W (putative)                                       | -2,309 | 8,505 |
| 222664_at   | KCTD15          | potassium channel tetramerization domain containing 15                             | 2,016  | 2,453 |
| 222666_s_at | RCL1            | RNA terminal phosphate cyclase like 1                                              | 2,601  | 3     |
| 222692_s_at | LOC101928615//  | uncharacterized LOC101928615//fibronectin type III domain containing 3B            | -2,367 | 4,243 |
| 222693_at   | LOC101928615//  | uncharacterized LOC101928615//fibronectin type III domain containing 3B            | -2,142 | 2,874 |
| 222704_at   | POLR1A          | RNA polymerase I subunit A                                                         | 1,626  | 4,542 |
| 222705_s_at | SLC25A15        | solute carrier family 25 member 15                                                 | 3,593  | 4,448 |
| 222717_at   | SDPR            | serum deprivation response                                                         | 4,46   | 7,4   |
| 222727_s_at | SLC8B1          | solute carrier family 8 member B1                                                  | -1,68  | 3,135 |
| 222734_at   | WARS2           | tryptophanyl tRNA synthetase 2, mitochondrial                                      | 2,028  | 2,829 |
| 222755_s_at | CHD7            | chromodomain helicase DNA binding protein 7                                        | -3,011 | 4,768 |
| 222771_s_at | MYEF2           | myelin expression factor 2                                                         | 2,313  | 2,483 |
| 222772_at   | MYEF2           | myelin expression factor 2                                                         | 2,113  | 2,446 |
| 222803_at   | PRTFDC1         | phosphoribosyl transferase domain containing 1                                     | 1,469  | 2,711 |
| 222833_at   | LPCAT2          | lysophosphatidylcholine acyltransferase 2                                          | -3,811 | 9,251 |
| 222842_at   | AGO4            | argonaute 4, RISC catalytic component                                              | -2,583 | 4,284 |
| 222845_x_at | TMBIM4          | transmembrane BAX inhibitor motif containing 4                                     | -1,701 | 5,567 |
| 222858_s_at | DAPP1           | dual adaptor of phosphotyrosine and 3-phosphoinositides 1                          | -3,788 | 4,422 |
| 222859_s_at | DAPP1           | dual adaptor of phosphotyrosine and 3-phosphoinositides 1                          | -3,528 | 4,908 |
| 222890_at   | CCDC113         | coiled-coil domain containing 113                                                  | 2,665  | 4,515 |
| 222920_s_at | TESPA1          | thymocyte expressed, positive selection associated 1                               | 2,696  | 4,094 |
| 222922_at   | KCNE3           | potassium voltage-gated channel subfamily E regulatory subunit 3                   | -2,691 | 2,72  |
| 222923_s_at | KCNE3           | potassium voltage-gated channel subfamily E regulatory subunit 3                   | -3,316 | 3,354 |
| 222930_s_at | AGMAT           | agmatinase                                                                         | 1,895  | 4,264 |
| 222939_s_at | SLC16A10        | solute carrier family 16 member 10                                                 | 2,302  | 3,809 |
| 222951_s_at | ANKEF1          | ankyrin repeat and EF-hand domain containing 1                                     | 2,093  | 5,695 |
| 222994_at   | PRDX5           | peroxiredoxin 5                                                                    | -1,926 | 4,087 |
| 222996_s_at | CXXC5           | CXXC finger protein 5                                                              | 2,751  | 3,422 |
| 223027_at   | SNX9            | sorting nexin 9                                                                    | 1,923  | 2,771 |
| 223036_at   | FARS8           | phenylalanyl-tRNA synthetase beta subunit                                          | 1,078  | 3,049 |
| 223046_at   | EGLN1           | egl-9 family hypoxia inducible factor 1                                            | -2,708 | 3,944 |
| 223047_at   | CMTM6           | CKLF like MARVEL transmembrane domain containing 6                                 | -2,681 | 5,103 |
| 223049_at   | GRB2            | growth factor receptor bound protein 2                                             | -1,572 | 3,559 |

|             |                  |                                                                        |        |        |
|-------------|------------------|------------------------------------------------------------------------|--------|--------|
| 223058_at   | FAM107B          | family with sequence similarity 107 member B                           | -5,224 | 8,736  |
| 223059_s_at | FAM107B          | family with sequence similarity 107 member B                           | -5,82  | 10,984 |
| 223063_at   | C1orf198         | chromosome 1 open reading frame 198                                    | 3,487  | 6,364  |
| 223070_at   | SELK             | selenoprotein K                                                        | -1,009 | 2,822  |
| 223082_at   | SH3KBP1          | SH3 domain containing kinase binding protein 1                         | -1,871 | 5,203  |
| 223092_at   | ANKH             | ANKH inorganic pyrophosphate transport regulator                       | 2,443  | 4,416  |
| 223094_s_at | ANKH             | ANKH inorganic pyrophosphate transport regulator                       | 1,704  | 4,66   |
| 223126_s_at | C1orf21          | chromosome 1 open reading frame 21                                     | 1,653  | 3,936  |
| 223127_s_at | C1orf21          | chromosome 1 open reading frame 21                                     | 0,914  | 2,549  |
| 223158_s_at | NEK6             | NIMA related kinase 6                                                  | -3,612 | 8,574  |
| 223159_s_at | NEK6             | NIMA related kinase 6                                                  | -4,399 | 7,591  |
| 223165_s_at | IP6K2            | inositol hexakisphosphate kinase 2                                     | 2,676  | 4,986  |
| 223168_at   | RHOU             | ras homolog family member U                                            | -4,281 | 3,485  |
| 223169_s_at | RHOU             | ras homolog family member U                                            | -3,105 | 3,488  |
| 223170_at   | TMEM98           | transmembrane protein 98                                               | 1,413  | 4,712  |
| 223174_at   | BTBD10           | BTB domain containing 10                                               | -1,874 | 2,67   |
| 223182_s_at | AGPAT3           | 1-acylglycerol-3-phosphate O-acyltransferase 3                         | 1,351  | 3,327  |
| 223183_at   | AGPAT3           | 1-acylglycerol-3-phosphate O-acyltransferase 3                         | 2,044  | 3,809  |
| 223184_s_at | AGPAT3           | 1-acylglycerol-3-phosphate O-acyltransferase 3                         | 1,954  | 3,281  |
| 223194_s_at | SLC22A23         | solute carrier family 22 member 23                                     | 2,78   | 8,793  |
| 223241_at   | MIR6836///SNX8   | microRNA 6836///sorting nexin 8                                        | 1,531  | 2,952  |
| 223264_at   | MESDC1           | mesoderm development candidate 1                                       | -1,614 | 3,473  |
| 223266_at   | STRADB           | STE20-related kinase adaptor beta                                      | 3,738  | 3,096  |
| 223276_at   | SMIM3            | small integral membrane protein 3                                      | -2,484 | 3,676  |
| 223280_x_at | MS4A6A           | membrane spanning 4-domains A6A                                        | -3,718 | 2,657  |
| 223284_at   | NAT14            | N-acetyltransferase 14 (putative)                                      | 1,139  | 3,296  |
| 223302_s_at | ZNF655           | zinc finger protein 655                                                | -1,413 | 2,554  |
| 223314_at   | TSPAN14          | tetraspanin 14                                                         | -1,979 | 4,273  |
| 223326_s_at | GOLGA2P10        | golgin A2 pseudogene 10                                                | 1,393  | 4,868  |
| 223327_x_at | GOLGA2P10        | golgin A2 pseudogene 10                                                | 1,601  | 5,783  |
| 223338_s_at | ATPIF1           | ATPase inhibitory factor 1                                             | 1,773  | 4,607  |
| 223346_at   | VPS18            | VPS18, CORVET/HOPS core subunit                                        | -1,466 | 4,656  |
| 223374_s_at | B3GALNT1         | beta-1,3-N-acetylgalactosaminyltransferase 1 (globoside blood group)   | 2,723  | 2,936  |
| 223376_s_at | BRI3             | brain protein I3                                                       | -3,113 | 3,393  |
| 223391_at   | SGPP1            | sphingosine-1-phosphate phosphatase 1                                  | 2,175  | 4,046  |
| 223396_at   | TMEM60           | transmembrane protein 60                                               | -1,365 | 2,763  |
| 223397_s_at | NIP7             | NIP7, nucleolar pre-rRNA processing protein                            | 2,006  | 2,694  |
| 223413_s_at | LYAR             | Ly1 antibody reactive                                                  | 2,915  | 2,707  |
| 223422_s_at | ARHGAP24         | Rho GTPase activating protein 24                                       | -4,413 | 2,896  |
| 223423_at   | GPR160           | G protein-coupled receptor 160                                         | -5,154 | 11,336 |
| 223432_at   | OSBP2            | oxysterol binding protein 2                                            | 0,735  | 2,459  |
| 223437_at   | PPARA            | peroxisome proliferator activated receptor alpha                       | 1,396  | 2,98   |
| 223438_s_at | PPARA            | peroxisome proliferator activated receptor alpha                       | 1,677  | 3,836  |
| 223465_at   | COL4A3BP         | collagen type IV alpha 3 binding protein                               | -2,179 | 2,495  |
| 223492_s_at | LRRFIP1          | LRR binding FLII interacting protein 1                                 | -1,524 | 3,342  |
| 223502_s_at | TNFSF13B         | tumor necrosis factor superfamily member 13b                           | -2,063 | 2,578  |
| 223515_s_at | COQ3             | coenzyme Q3, methyltransferase                                         | 2,93   | 2,795  |
| 223530_at   | TDRKH            | tudor and KH domain containing                                         | 1,496  | 3,201  |
| 223534_s_at | RP56KL1          | ribosomal protein S6 kinase like 1                                     | 1,283  | 3,571  |
| 223549_s_at | ESPN             | espin                                                                  | 1,152  | 3,564  |
| 223553_s_at | DOK3             | docking protein 3                                                      | -2,641 | 3,325  |
| 223557_s_at | TMEFF2           | transmembrane protein with EGF like and two follistatin like domains 2 | 1,648  | 7,4    |
| 223561_at   | NEK6             | NIMA related kinase 6                                                  | -2,898 | 3,566  |
| 223562_at   | PARVG            | parvin gamma                                                           | -3,104 | 10,612 |
| 223583_at   | TNFAIP8L2        | TNF alpha induced protein 8 like 2                                     | -2,298 | 4,464  |
| 223594_at   | TMEM117          | transmembrane protein 117                                              | 1,346  | 3,726  |
| 223595_s_at | TMEM133          | transmembrane protein 133                                              | 0,934  | 2,865  |
| 223597_at   | ITLN1            | intelectin 1                                                           | 1,847  | 6,381  |
| 223602_at   | USP30            | ubiquitin specific peptidase 30                                        | 1,073  | 4,021  |
| 223611_s_at | LNK1             | ligand of numb-protein X 1                                             | 1,057  | 4,127  |
| 223627_at   | MEX3B            | mex-3 RNA binding family member B                                      | 3,229  | 6,354  |
| 223635_s_at | SSBP3            | single stranded DNA binding protein 3                                  | 2,514  | 3,438  |
| 223637_s_at | FAM160A2         | family with sequence similarity 160 member A2                          | -2,559 | 2,476  |
| 223640_at   | HCST             | hematopoietic cell signal transducer                                   | -3,235 | 7,037  |
| 223650_s_at | NRBF2            | nuclear receptor binding factor 2                                      | -2,56  | 2,634  |
| 223666_at   | SNX5             | sorting nexin 5                                                        | 1,755  | 5,148  |
| 223669_at   | HEMGN            | hemogen                                                                | 3,527  | 3,128  |
| 223670_s_at | HEMGN            | hemogen                                                                | 2,438  | 3,685  |
| 223725_at   | LINC00852        | long intergenic non-protein coding RNA 852                             | -2,06  | 3,477  |
| 223740_at   | AGPAT4-IT1       | AGPAT4 intronic transcript 1                                           | 1,844  | 4,748  |
| 223754_at   | C2orf88          | chromosome 2 open reading frame 88                                     | 3,274  | 7,803  |
| 223776_x_at | TINF2            | TERF1 interacting nuclear factor 2                                     | -1,843 | 3,788  |
| 223801_s_at | APOL4            | apolipoprotein L4                                                      | 1,639  | 4,701  |
| 223809_at   | RGS18            | regulator of G-protein signaling 18                                    | -3,298 | 3,275  |
| 223812_at   | FAM178B          | family with sequence similarity 178 member B                           | 2,509  | 4,582  |
| 223832_s_at | CAPNS2           | calpain small subunit 2                                                | -1,683 | 2,445  |
| 223840_s_at | SPATA9           | spermatogenesis associated 9                                           | 1,361  | 4,391  |
| 223841_s_at | SPATA9           | spermatogenesis associated 9                                           | 0,981  | 3,144  |
| 223850_at   |                  |                                                                        | -1,302 | 2,509  |
| 223856_at   | AKR1E2           | aldo-keto reductase family 1 member E2                                 | 1,356  | 5,453  |
| 223862_at   | GHRL             | ghrelin/obestatin prepropeptide                                        | -2,645 | 6,285  |
| 223880_x_at | TGIF2-C20orf24// | TGIF2-C20orf24 readthrough///chromosome 20 open reading frame 24       | -1,632 | 3,141  |
| 223886_s_at | RNF146           | ring finger protein 146                                                | -1,338 | 5,713  |
| 223892_s_at | TMBIM4           | transmembrane BAX inhibitor motif containing 4                         | -1,747 | 5,282  |
| 223894_s_at | AKTIP            | AKT interacting protein                                                | -4,116 | 2,9    |
| 223898_at   | ZNF670           | zinc finger protein 670                                                | 2,109  | 2,469  |
| 223922_x_at | MS4A6A           | membrane spanning 4-domains A6A                                        | -3,27  | 2,495  |
| 223924_at   | TTC25            | tetratricopeptide repeat domain 25                                     | 1,431  | 3,169  |
| 223952_x_at | DHRS9            | dehydrogenase/reductase 9                                              | -4,718 | 2,578  |
| 223976_at   | FUT10            | fucosyltransferase 10                                                  | 0,999  | 2,466  |
| 223982_s_at | PNPLA8           | patatin like phospholipase domain containing 8                         | -0,995 | 2,452  |
| 223989_s_at | REXO2            | RNA exonuclease 2                                                      | 3,125  | 5,239  |
| 223991_s_at | GALNT2           | polypeptide N-acetyl/galactosaminyltransferase 2                       | 1,281  | 2,512  |
| 223993_s_at | CNIH4            | cornichon family AMPA receptor auxiliary protein 4                     | -1,55  | 4,189  |
| 224009_x_at | DHRS9            | dehydrogenase/reductase 9                                              | -5,354 | 3,068  |
| 224025_s_at | ATG7             | autophagy related 7                                                    | -1,839 | 6,749  |
| 224057_s_at | THAP4            | THAP domain containing 4                                               | 1,426  | 2,529  |
| 224068_x_at | RBM22            | RNA binding motif protein 22                                           | -1,085 | 2,479  |
| 224099_at   | KCNH7            | potassium voltage-gated channel subfamily H member 7                   | -3,741 | 2,893  |
| 224148_at   | FYB              | FYN binding protein                                                    | -4,268 | 4,937  |
| 224150_s_at | CEP70            | centrosomal protein 70                                                 | 2,43   | 2,457  |
| 224158_s_at | TRIQQ            | triple QxxK/R motif containing                                         | -1,776 | 3,246  |

|             |                  |                                                                                    |        |        |
|-------------|------------------|------------------------------------------------------------------------------------|--------|--------|
| 224162_s_at | FBXO31           | F-box protein 31                                                                   | 1,607  | 3,664  |
| 224165_s_at | IQCH             | IQ motif containing H                                                              | 1,031  | 4,386  |
| 224170_s_at | TULP4            | tubby like protein 4                                                               | 1,174  | 3,819  |
| 224188_s_at | XPNPEP3          | X-prolyl aminopeptidase 3                                                          | 1,068  | 3,143  |
| 224204_x_at | ARNTL2           | aryl hydrocarbon receptor nuclear translocator like 2                              | 2,019  | 2,832  |
| 224208_at   | PLEKHA8          | pleckstrin homology domain containing A8                                           | 1,146  | 2,899  |
| 224282_s_at | AGPAT3           | 1-acylglycerol-3-phosphate O-acyltransferase 3                                     | 1,695  | 3,827  |
| 224314_s_at | EGLN1            | egl-9 family hypoxia inducible factor 1                                            | -2,605 | 2,883  |
| 224341_x_at | TLR4             | toll like receptor 4                                                               | -2,859 | 2,944  |
| 224356_x_at | MS4A6A           | membrane spanning 4-domains A6A                                                    | -4,025 | 2,829  |
| 224376_s_at | TGIF2-C20orf24// | TGIF2-C20orf24 readthrough///chromosome 20 open reading frame 24                   | -1,802 | 3,431  |
| 224414_s_at | CARD6            | caspase recruitment domain family member 6                                         | -2,311 | 3,157  |
| 224442_at   | PHF6             | PHD finger protein 6                                                               | 1,427  | 3,476  |
| 224451_x_at | ARHGAP9          | Rho GTPase activating protein 9                                                    | -3,953 | 4,254  |
| 224455_s_at | ADPGK            | ADP dependent glucokinase                                                          | -1,691 | 5,532  |
| 224458_at   | TMEM246          | transmembrane protein 246                                                          | 3,221  | 6,613  |
| 224462_s_at | CHCHD6           | coiled-coil-helix-coiled-coil-helix domain containing 6                            | 1,199  | 3,013  |
| 224469_s_at | INF2             | inverted formin, FH2 and WH2 domain containing                                     | 2,415  | 6,662  |
| 224490_s_at | LOC101929774     | uncharacterized LOC101929774                                                       | -1,932 | 2,609  |
| 224500_s_at | MON1A            | MON1 homolog A, secretory trafficking associated                                   | 1,585  | 3,493  |
| 224507_s_at | MGC12916         | uncharacterized protein MGC12916                                                   | -3,204 | 3,34   |
| 224508_at   | MGC12916         | uncharacterized protein MGC12916                                                   | -3,72  | 4,468  |
| 224516_s_at | CXXC5            | CXXC finger protein 5                                                              | 3,808  | 4,101  |
| 224521_s_at | CCDC77           | coiled-coil domain containing 77                                                   | 1,161  | 3,351  |
| 224542_s_at | NFATC2           | nuclear factor of activated T-cells 2                                              | 1,511  | 6,478  |
| 224546_at   |                  |                                                                                    | 0,951  | 2,501  |
| 224560_at   | TIMP2            | TIMP metalloproteinase inhibitor 2                                                 | -5,206 | 7,177  |
| 224573_at   | RNASEK-C17orf49  | RNASEK-C17orf49 readthrough///ribonuclease K///chromosome 17 open reading frame 49 | -1,559 | 5,644  |
| 224583_at   | COTL1            | coactosin like F-actin binding protein 1                                           | -4,961 | 5,046  |
| 224585_x_at | ACTG1///ACTB     | actin gamma 1///actin beta                                                         | -1,009 | 3,05   |
| 224611_s_at | DNAJC5           | DnaJ heat shock protein family (Hsp40) member C5                                   | -2,511 | 5,712  |
| 224612_s_at | DNAJC5           | DnaJ heat shock protein family (Hsp40) member C5                                   | -2,827 | 5,11   |
| 224613_s_at | DNAJC5           | DnaJ heat shock protein family (Hsp40) member C5                                   | -2,691 | 5,159  |
| 224656_s_at | LUZP6///MTPN     | leucine zipper protein 6///myotrophin                                              | -0,775 | 3,256  |
| 224690_at   | FAM210B          | family with sequence similarity 210 member B                                       | 1,835  | 3,703  |
| 224693_at   | FAM210B          | family with sequence similarity 210 member B                                       | 1,774  | 2,643  |
| 224707_at   | CYSTM1           | cysteine rich transmembrane module containing 1                                    | -6,091 | 4,984  |
| 224726_at   | MIB1             | mindbomb E3 ubiquitin protein ligase 1                                             | 1,268  | 2,467  |
| 224764_at   | ARHGAP21         | Rho GTPase activating protein 21                                                   | 2,645  | 3,371  |
| 224793_s_at | TGFBR1           | transforming growth factor beta receptor 1                                         | -2,365 | 3,819  |
| 224799_at   | NDFIP2           | Nedd4 family interacting protein 2                                                 | 2,026  | 4,7    |
| 224801_at   | NDFIP2           | Nedd4 family interacting protein 2                                                 | 1,534  | 5,733  |
| 224802_at   | NDFIP2           | Nedd4 family interacting protein 2                                                 | 2,427  | 3,259  |
| 224817_at   | SH3PXD2A         | SH3 and PX domains 2A                                                              | 2,575  | 5,626  |
| 224818_at   | SORT1            | sortilin 1                                                                         | -4,845 | 4,201  |
| 224822_at   | DLC1             | DLC1 Rho GTPase activating protein                                                 | 4,328  | 5,751  |
| 224825_at   | DNTTIP1          | deoxynucleotidyltransferase terminal interacting protein 1                         | -1,425 | 3,177  |
| 224827_at   | UBTD2            | ubiquitin domain containing 2                                                      | -2,743 | 2,778  |
| 224828_at   | CPEB4            | cytoplasmic polyadenylation element binding protein 4                              | -2,969 | 3,492  |
| 224831_at   | CPEB4            | cytoplasmic polyadenylation element binding protein 4                              | -2,269 | 2,847  |
| 224832_at   | DUSP16           | dual specificity phosphatase 16                                                    | -2,247 | 4,427  |
| 224834_at   | UBTD2            | ubiquitin domain containing 2                                                      | -2,21  | 3,664  |
| 224835_at   | GPCPD1           | glycerophosphocholine phosphodiesterase 1                                          | -2,306 | 2,91   |
| 224884_at   | AKAP13           | A-kinase anchoring protein 13                                                      | -2,232 | 2,586  |
| 224911_s_at | DCBLD2           | discoidin, CUB and LCCL domain containing 2                                        | 1,573  | 3,341  |
| 224927_at   | PPP1R18          | protein phosphatase 1 regulatory subunit 18                                        | -3,634 | 2,868  |
| 224938_at   | NUFIP2           | NUFIP2, FMR1 interacting protein 2                                                 | -0,912 | 2,558  |
| 224940_s_at | PAPPA            | pappalysin 1                                                                       | 1,493  | 4,288  |
| 224951_at   | CERS5            | ceramide synthase 5                                                                | -0,785 | 3,071  |
| 224970_at   | NFIA             | nuclear factor I A                                                                 | 5,512  | 3,764  |
| 224975_at   | NFIA             | nuclear factor I A                                                                 | 5,571  | 3,188  |
| 224976_at   | NFIA             | nuclear factor I A                                                                 | 5,259  | 4,757  |
| 224979_s_at | USP36            | ubiquitin specific peptidase 36                                                    | 0,79   | 3,245  |
| 224982_at   | AKT1S1           | AKT1 substrate 1                                                                   | 0,984  | 2,713  |
| 224983_at   | SCARB2           | scavenger receptor class B member 2                                                | 2,1    | 3,037  |
| 224989_at   | SMIM14           | small integral membrane protein 14                                                 | -2,954 | 7,42   |
| 224990_at   | SMIM14           | small integral membrane protein 14                                                 | -3,16  | 12,172 |
| 224998_at   | CMTM4            | CKLF like MARVEL transmembrane domain containing 4                                 | -2,066 | 2,823  |
| 225001_at   | RAB3D            | RAB3D, member RAS oncogene family                                                  | -3,04  | 4,024  |
| 225009_at   | CMTM4            | CKLF like MARVEL transmembrane domain containing 4                                 | -1,855 | 2,833  |
| 225026_at   | CHD6             | chromodomain helicase DNA binding protein 6                                        | 2,036  | 2,465  |
| 225032_at   | LOC101928615///  | uncharacterized LOC101928615///fibronectin type III domain containing 3B           | -2,508 | 3,806  |
| 225054_x_at | LINC00674        | long intergenic non-protein coding RNA 674                                         | -1,03  | 3,044  |
| 225059_at   | AGTRAP           | angiotensin II receptor associated protein                                         | -1,808 | 3,366  |
| 225060_at   | LRP11            | LDL receptor related protein 11                                                    | 2,443  | 2,457  |
| 225061_at   | DNAJA4           | DnaJ heat shock protein family (Hsp40) member A4                                   | 3,016  | 3,678  |
| 225069_at   | PCYT1A           | phosphate cytidylyltransferase 1, choline, alpha                                   | -1,267 | 2,701  |
| 225093_at   | UTRN             | utrophin                                                                           | -0,881 | 2,533  |
| 225098_at   | ABI2             | abl-interactor 2                                                                   | 3,496  | 3,101  |
| 225119_at   | CHMP4B           | charged multivesicular body protein 4B                                             | -1,441 | 2,636  |
| 225129_at   | CPNE2            | copine 2                                                                           | -4,059 | 6,441  |
| 225188_at   | RAPH1            | Ras association (RalGDS/AF-6) and pleckstrin homology domains 1                    | 1,962  | 7,144  |
| 225191_at   | CIRBP            | cold inducible RNA binding protein                                                 | -1,843 | 2,709  |
| 225202_at   | RHOBTB3          | Rho related BTB domain containing 3                                                | 3,325  | 3,743  |
| 225214_at   | LOC100129034     | uncharacterized LOC100129034                                                       | -2,783 | 3,718  |
| 225231_at   | CBL              | Cbl proto-oncogene                                                                 | -4,827 | 7,642  |
| 225232_at   | MTMR12           | myotubularin related protein 12                                                    | 1,95   | 3,994  |
| 225234_at   | CBL              | Cbl proto-oncogene                                                                 | -4,099 | 6,857  |
| 225235_at   | TSPAN17          | tetraspanin 17                                                                     | 2,749  | 4,229  |
| 225257_at   | CCDC97           | coiled-coil domain containing 97                                                   | -0,675 | 2,629  |
| 225259_at   | RAB6B            | RAB6B, member RAS oncogene family                                                  | 1,435  | 5,06   |
| 225262_at   | FOSL2            | FOS like 2, AP-1 transcription factor subunit                                      | -3,623 | 2,518  |
| 225265_at   | RBMS1            | RNA binding motif single stranded interacting protein 1                            | -1,701 | 3,343  |
| 225280_x_at | ARSD             | arylsulfatase D                                                                    | -1,843 | 2,465  |
| 225284_at   | DNAJC3           | DnaJ heat shock protein family (Hsp40) member C3                                   | -1,446 | 4,508  |
| 225294_s_at | TRAPPC1          | trafficking protein particle complex 1                                             | -1,17  | 2,699  |
| 225307_at   | ZNF511           | zinc finger protein 511                                                            | 1,001  | 2,563  |
| 225308_s_at | TANC1            | tetratricopeptide repeat, ankyrin repeat and coiled-coil containing 1              | 3,162  | 5,122  |
| 225314_at   | OCIA2            | OCIA domain containing 2                                                           | 3,554  | 4,714  |
| 225323_at   | CC2D1B           | coiled-coil and C2 domain containing 1B                                            | -1,093 | 4,125  |
| 225346_at   | MTERF2           | mitochondrial transcription termination factor 2                                   | 1,921  | 3,351  |
| 225354_s_at | SH3BGR12         | SH3 domain binding glutamate rich protein like 2                                   | 3,071  | 7,722  |

|             |                  |                                                                                         |        |       |
|-------------|------------------|-----------------------------------------------------------------------------------------|--------|-------|
| 225372_at   | C10orf54         | chromosome 10 open reading frame 54                                                     | -4,778 | 4,863 |
| 225373_at   | C10orf54         | chromosome 10 open reading frame 54                                                     | -4,045 | 5,069 |
| 225440_at   | AGPAT3           | 1-acylglycerol-3-phosphate O-acyltransferase 3                                          | 1,767  | 2,763 |
| 225451_at   | GRIPAP1          | GRIP1 associated protein 1                                                              | -1,345 | 4,522 |
| 225459_at   | AMOTL1           | angiotensin like 1                                                                      | 2,414  | 4,833 |
| 225475_at   | MIER1            | MIER1 transcriptional regulator                                                         | -0,901 | 2,665 |
| 225478_at   | MFHAS1           | malignant fibrous histiocytoma amplified sequence 1                                     | 4,003  | 2,938 |
| 225498_at   | CHMP4B           | charged multivesicular body protein 4B                                                  | -1,895 | 2,887 |
| 225499_at   | RALGAP2          | Ral GTPase activating protein catalytic alpha subunit 2                                 | -1,278 | 2,783 |
| 225501_at   | PHF6             | PHD finger protein 6                                                                    | 2,681  | 2,538 |
| 225502_at   | DOCK8            | dedicator of cytokinesis 8                                                              | -2,527 | 2,874 |
| 225506_at   | KIAA1468         | KIAA1468                                                                                | -1,203 | 3,954 |
| 225508_at   | KIAA1468         | KIAA1468                                                                                | -1,348 | 3,081 |
| 225510_at   | OAF              | out at first homolog                                                                    | 1,697  | 2,971 |
| 225524_at   | ANTXR2           | anthrax toxin receptor 2                                                                | -4,214 | 7,326 |
| 225525_at   | KIAA1671         | KIAA1671                                                                                | 2,048  | 7,449 |
| 225532_at   | CABLES1          | Cdk5 and Abl enzyme substrate 1                                                         | 2,676  | 4,402 |
| 225558_at   | GIT2             | GIT ArfGAP 2                                                                            | -1,549 | 2,858 |
| 225561_at   | SELT             | selenoprotein T                                                                         | -0,952 | 3,776 |
| 225569_at   | CASC7///AGO2     | cancer susceptibility candidate 7 (non-protein coding)///argonaute 2, RISC catalytic co | 1,346  | 2,899 |
| 225570_at   | SLC41A1          | solute carrier family 41 member 1                                                       | 3,053  | 7,461 |
| 225599_s_at | TRIQQ            | triple QxxK/R motif containing                                                          | -1,381 | 2,669 |
| 225600_at   | TRIQQ            | triple QxxK/R motif containing                                                          | -1,678 | 2,901 |
| 225602_at   | GLIPR2           | GLI pathogenesis related 2                                                              | -2,504 | 3,177 |
| 225604_s_at | GLIPR2           | GLI pathogenesis related 2                                                              | -2,461 | 2,587 |
| 225618_at   | ARHGAP27         | Rho GTPase activating protein 27                                                        | -4,752 | 5,026 |
| 225622_at   | PAG1             | phosphoprotein membrane anchor with glycosphingolipid microdomains 1                    | -3,949 | 3,06  |
| 225626_at   | PAG1             | phosphoprotein membrane anchor with glycosphingolipid microdomains 1                    | -4,646 | 4,162 |
| 225632_s_at | ISY1-RAB43///RAB | ISY1-RAB43 readthrough///RAB43, member RAS oncogene family                              | -3,029 | 3,499 |
| 225639_at   | SKAP2            | src kinase associated phosphoprotein 2                                                  | -1,913 | 3,42  |
| 225641_at   | MEF2D            | myocyte enhancer factor 2D                                                              | -1,562 | 3,74  |
| 225643_at   | MAPK1IP1L        | mitogen-activated protein kinase 1 interacting protein 1 like                           | 1,198  | 2,76  |
| 225672_at   | GOLGA2           | golgin A2                                                                               | -1,002 | 3,837 |
| 225689_at   | POMGNT2          | protein O-linked mannose N-acetylglucosaminyltransferase 2 (beta 1,4-)                  | 2,07   | 5,392 |
| 225701_at   | AKNA             | AT-hook transcription factor                                                            | -3,436 | 2,811 |
| 225704_at   | FBRSL1           | fibrosin like 1                                                                         | 1,306  | 2,531 |
| 225713_at   | STK11IP          | serine/threonine kinase 11 interacting protein                                          | -1,121 | 2,694 |
| 225724_at   | PSMA3-AS1        | PSMA3 antisense RNA 1                                                                   | -1,168 | 3,476 |
| 225726_s_at | PLEKHH1          | pleckstrin homology, MyTH4 and FERM domain containing H1                                | 1,705  | 3,033 |
| 225750_at   | ERO1A            | endoplasmic reticulum oxidoreductase 1 alpha                                            | -2,151 | 3,493 |
| 225763_at   | RCSO1            | RCSO domain containing 1                                                                | -3,668 | 8,247 |
| 225765_at   | TNPO1            | transportin 1                                                                           | 1,227  | 4,011 |
| 225776_at   | RBMS2            | RNA binding motif single stranded interacting protein 2                                 | -1,512 | 3,56  |
| 225792_at   | HOOK1            | hook microtubule tethering protein 1                                                    | 3,703  | 9,416 |
| 225796_at   | PXK              | PX domain containing serine/threonine kinase like                                       | -2,085 | 5,326 |
| 225799_at   | LOC101930489///  | uncharacterized LOC101930489///MIR4435-2 host gene///long intergenic non-protein        | 1,494  | 4,013 |
| 225819_at   | TBRG1            | transforming growth factor beta regulator 1                                             | -1,209 | 4     |
| 225829_at   | PDZD8            | PDZ domain containing 8                                                                 | 1,115  | 3,569 |
| 225830_at   | PDZD8            | PDZ domain containing 8                                                                 | 1,238  | 3,267 |
| 225860_at   | MMP24-AS1        | MMP24 antisense RNA 1                                                                   | -1,446 | 3,13  |
| 225861_at   | MCRIP2           | MAPK regulated corepressor interacting protein 2                                        | 0,733  | 2,507 |
| 225883_at   | ATG16L2          | autophagy related 16 like 2                                                             | -3,317 | 4,017 |
| 225897_at   | MARCKS           | myristoylated alanine rich protein kinase C substrate                                   | -4,124 | 6,919 |
| 225900_at   | EXOC6B           | exocyst complex component 6B                                                            | 2,302  | 4,09  |
| 225902_at   | PPIG             | peptidylprolyl isomerase G                                                              | 0,804  | 2,556 |
| 225907_at   | LOC728743        | zinc finger protein pseudogene                                                          | 1,033  | 2,844 |
| 225909_at   | LOC728743///ZNF  | zinc finger protein pseudogene///zinc finger protein 775                                | 1,645  | 2,955 |
| 225929_s_at | RNF213           | ring finger protein 213                                                                 | -2,845 | 3,12  |
| 225931_s_at | RNF213           | ring finger protein 213                                                                 | -3,424 | 3,447 |
| 225939_at   | EIF4E3           | eukaryotic translation initiation factor 4E family member 3                             | -3,972 | 4,524 |
| 225940_at   | EIF4E3           | eukaryotic translation initiation factor 4E family member 3                             | -3,741 | 5,831 |
| 225941_at   | EIF4E3           | eukaryotic translation initiation factor 4E family member 3                             | -3,804 | 5,351 |
| 225972_at   | TMEM64           | transmembrane protein 64                                                                | 2,549  | 4,52  |
| 225974_at   | TMEM64           | transmembrane protein 64                                                                | 3,357  | 3,03  |
| 225997_at   | MOB1B            | MOB kinase activator 1B                                                                 | 4,008  | 2,579 |
| 226002_at   | GAB1             | GRB2 associated binding protein 1                                                       | 1,445  | 2,516 |
| 226017_at   | CMTM7            | CKLF like MARVEL transmembrane domain containing 7                                      | -2,425 | 5,826 |
| 226018_at   | MTURN            | maturin, neural progenitor differentiation regulator homolog (Xenopus)                  | 1,815  | 4,688 |
| 226026_at   | DIRC2            | disrupted in renal carcinoma 2                                                          | -2,207 | 3,324 |
| 226029_at   | VANGL2           | VANGL planar cell polarity protein 2                                                    | 2,485  | 7,478 |
| 226030_at   | ACAD5B           | acyl-CoA dehydrogenase, short/branched chain                                            | 1,526  | 2,507 |
| 226039_at   | MGAT4A           | mannosyl (alpha-1,3-)-glycoprotein beta-1,4-N-acetylglucosaminyltransferase, isozym     | -3,48  | 4,376 |
| 226048_at   | MAPK8            | mitogen-activated protein kinase 8                                                      | 1,271  | 3,176 |
| 226068_at   | SYK              | spleen associated tyrosine kinase                                                       | -1,93  | 5,149 |
| 226102_at   | ZKSCAN8          | zinc finger with KRAB and SCAN domains 8                                                | 1,823  | 2,447 |
| 226106_at   | RNF141           | ring finger protein 141                                                                 | -2,212 | 2,699 |
| 226122_at   | PLEKHG1          | pleckstrin homology and RhoGEF domain containing G1                                     | 4,365  | 8,847 |
| 226123_at   | CHD7             | chromodomain helicase DNA binding protein 7                                             | -3,099 | 4,121 |
| 226140_s_at | OTUD1            | OTU deubiquitinase 1                                                                    | -1,464 | 3,059 |
| 226169_at   | SBF2             | SET binding factor 2                                                                    | -3,669 | 3,528 |
| 226171_at   | ZDHHC3           | zinc finger DHHC-type containing 3                                                      | -1,869 | 2,691 |
| 226186_at   | TMOD2            | tropomodulin 2                                                                          | -2,657 | 3,326 |
| 226195_at   | IFT43            | intraflagellar transport 43                                                             | 1,393  | 3,608 |
| 226196_s_at | IFT43            | intraflagellar transport 43                                                             | 2,016  | 2,823 |
| 226205_at   | ANKRD13D         | ankyrin repeat domain 13D                                                               | -1,996 | 3,244 |
| 226206_at   | MAFK             | MAF bZIP transcription factor K                                                         | -1,003 | 2,688 |
| 226219_at   | ARHGAP30         | Rho GTPase activating protein 30                                                        | -4,45  | 5,153 |
| 226232_at   | GDF11            | growth differentiation factor 11                                                        | 0,866  | 2,868 |
| 226234_at   | GDF11            | growth differentiation factor 11                                                        | 2,324  | 4,74  |
| 226245_at   | KCTD1            | potassium channel tetramerization domain containing 1                                   | 2,235  | 4,94  |
| 226246_at   | KCTD1            | potassium channel tetramerization domain containing 1                                   | 2,307  | 6,183 |
| 226267_at   | JDP2             | Jun dimerization protein 2                                                              | -2,743 | 4,515 |
| 226273_at   | CLCN5            | chloride voltage-gated channel 5                                                        | 2,717  | 6,94  |
| 226274_at   | CLCN5            | chloride voltage-gated channel 5                                                        | 2,656  | 4,405 |
| 226277_at   | COL4A3BP         | collagen type IV alpha 3 binding protein                                                | -1,75  | 2,695 |
| 226286_at   | ELMOD3           | ELMO domain containing 3                                                                | -1,261 | 2,941 |
| 226297_at   | HIIPK3           | homeodomain interacting protein kinase 3                                                | -1,324 | 4,506 |
| 226298_at   | RUNDC1           | RUN domain containing 1                                                                 | -1,456 | 2,658 |
| 226299_at   | PKN3             | protein kinase N3                                                                       | 1,498  | 3,569 |
| 226301_at   | SLC18B1          | solute carrier family 18 member B1                                                      | 3,359  | 9,441 |
| 226326_at   | PCGF5            | polycomb group ring finger 5                                                            | 1,599  | 2,478 |
| 226333_at   | IL6R             | interleukin 6 receptor                                                                  | -4,68  | 6,332 |

|             |                 |                                                                                        |        |        |
|-------------|-----------------|----------------------------------------------------------------------------------------|--------|--------|
| 226338_at   | TMEM55A         | transmembrane protein 55A                                                              | -4,135 | 5,246  |
| 226342_at   | SPTBN1          | spectrin beta, non-erythrocytic 1                                                      | -2,976 | 3,898  |
| 226346_at   | MEX3A           | mex-3 RNA binding family member A                                                      | 0,77   | 3,473  |
| 226360_at   | ZNRF3           | zinc and ring finger 3                                                                 | 2,059  | 7,437  |
| 226374_at   | CXADR           | coxsackie virus and adenovirus receptor                                                | 4,051  | 9,781  |
| 226403_at   | TMC4            | transmembrane channel like 4                                                           | -1,505 | 2,82   |
| 226405_s_at | ARRDC1          | arrestin domain containing 1                                                           | -1,762 | 3,271  |
| 226410_at   | CTU2            | cytosolic thiouridylase subunit 2                                                      | 1,034  | 2,556  |
| 226420_at   | MECOM           | MD51 and EVI1 complex locus                                                            | 3,265  | 5,735  |
| 226421_at   | AMMECR1         | Alport syndrome, mental retardation, midface hypoplasia and elliptocytosis chromos     | 2,766  | 6,173  |
| 226432_at   | ETNK1           | ethanolamine kinase 1                                                                  | 1,384  | 2,556  |
| 226440_at   | LOC100653247/// | dual specificity protein phosphatase 22-like///dual specificity phosphatase 22         | -1,939 | 2,684  |
| 226441_at   | MAP3K2          | mitogen-activated protein kinase kinase kinase 2                                       | -2,166 | 2,859  |
| 226446_at   | HES6            | hes family bHLH transcription factor 6                                                 | 2,322  | 9,246  |
| 226448_at   | MIR1182///FAM8! | microRNA 1182///family with sequence similarity 89 member A                            | 5,916  | 3,506  |
| 226451_at   | FDX1L           | ferredoxin 1 like                                                                      | 1,642  | 4,379  |
| 226459_at   | PIK3AP1         | phosphoinositide-3-kinase adaptor protein 1                                            | -1,886 | 2,907  |
| 226472_at   | PPIL4           | peptidylprolyl isomerase like 4                                                        | 0,878  | 2,498  |
| 226474_at   | NLRCS           | NLR family CARD domain containing 5                                                    | -3,521 | 2,5    |
| 226475_at   | FAM118A         | family with sequence similarity 118 member A                                           | 2,538  | 4,955  |
| 226484_at   | ZBTB47          | zinc finger and BTB domain containing 47                                               | -1,469 | 2,826  |
| 226499_at   | NRARP           | NOTCH-regulated ankyrin repeat protein                                                 | 1,09   | 3,722  |
| 226500_at   | ZBTB47          | zinc finger and BTB domain containing 47                                               | -1,032 | 2,833  |
| 226503_at   | RIF1            | replication timing regulatory factor 1                                                 | 2,228  | 3,053  |
| 226507_at   | PAK1            | p21 (RAC1) activated kinase 1                                                          | -2,437 | 2,721  |
| 226519_s_at | PHYKPL          | 5-phosphohydroxy-L-lysine phospho-lyase                                                | -1,754 | 2,828  |
| 226550_at   | SLC9A7          | solute carrier family 9 member A7                                                      | 3,622  | 3,295  |
| 226560_at   | SGPP2           | sphingosine-1-phosphate phosphatase 2                                                  | 1,543  | 3,576  |
| 226566_at   | TRIM11          | tripartite motif containing 11                                                         | -0,852 | 3,585  |
| 226586_at   | ANKS6           | ankyrin repeat and sterile alpha motif domain containing 6                             | 1,176  | 3,552  |
| 226587_at   | PWAR6           | Prader Willi/Angelman region RNA 6                                                     | 2,295  | 4,624  |
| 226591_at   | PWAR6           | Prader Willi/Angelman region RNA 6                                                     | 2,182  | 5,524  |
| 226592_at   | ZNF618          | zinc finger protein 618                                                                | 2,668  | 2,979  |
| 226610_at   | CENPV           | centromere protein V                                                                   | 3,336  | 3,668  |
| 226611_s_at | CENPV           | centromere protein V                                                                   | 1,89   | 3,141  |
| 226637_at   | UBE2H           | ubiquitin conjugating enzyme E2 H                                                      | -2,242 | 2,648  |
| 226639_at   | SFT2D3          | SFT2 domain containing 3                                                               | 1,222  | 2,446  |
| 226641_at   | ANKRD44         | ankyrin repeat domain 44                                                               | -3,436 | 5,089  |
| 226647_at   | TMEM25          | transmembrane protein 25                                                               | 0,638  | 2,531  |
| 226659_at   | DEF6            | DEF6, guanine nucleotide exchange factor                                               | -3,293 | 4,362  |
| 226676_at   | ZNF521          | zinc finger protein 521                                                                | 2,971  | 6,344  |
| 226677_at   | ZNF521          | zinc finger protein 521                                                                | 2,948  | 5,471  |
| 226683_at   | SNX18           | sorting nexin 18                                                                       | -2,479 | 6,787  |
| 226706_at   | FLJ23867///QSOX | uncharacterized protein FLJ23867///quiescin sulphydryl oxidase 1                       | -1,934 | 3,816  |
| 226720_at   | PWWP2A          | PWWP domain containing 2A                                                              | -0,944 | 3,473  |
| 226736_at   | CHURC1          | churchill domain containing 1                                                          | -2,062 | 3,507  |
| 226751_at   | CNRIP1          | cannabinoid receptor interacting protein 1                                             | 6,297  | 5,298  |
| 226765_at   | SPTBN1          | spectrin beta, non-erythrocytic 1                                                      | -3,199 | 5,658  |
| 226789_at   | EMB             | embigin                                                                                | -3,98  | 5,285  |
| 226801_s_at | AIDA            | axin interactor, dorsalization associated                                              | 1,401  | 3,407  |
| 226803_at   | CHMP4C          | charged multivesicular body protein 4C                                                 | 1,844  | 5,237  |
| 226806_s_at | NFIA            | nuclear factor I A                                                                     | 5,899  | 4,062  |
| 226818_at   | MPEG1           | macrophage expressed 1                                                                 | -5,559 | 2,747  |
| 226820_at   | ZNF362          | zinc finger protein 362                                                                | 0,924  | 2,681  |
| 226821_at   | RIF1            | replication timing regulatory factor 1                                                 | 1,189  | 3,944  |
| 226837_at   | SPRED1          | sprouty related EVH1 domain containing 1                                               | 2,069  | 2,834  |
| 226847_at   | FST             | follistatin                                                                            | 2,11   | 7,081  |
| 226858_at   | CSNK1E          | casein kinase 1 epsilon                                                                | 1,418  | 4,499  |
| 226864_at   | PKIA            | protein kinase (cAMP-dependent, catalytic) inhibitor alpha                             | 1,83   | 6,477  |
| 226869_at   | MEGF6           | multiple EGF like domains 6                                                            | -1,663 | 2,944  |
| 226875_at   | DOCK11          | dedicator of cytokinesis 11                                                            | -1,327 | 3,681  |
| 226876_at   | FAM101B         | family with sequence similarity 101 member B                                           | -4,372 | 4,838  |
| 226905_at   | FAM101B         | family with sequence similarity 101 member B                                           | -4,298 | 7,188  |
| 226906_s_at | ARHGAP9         | Rho GTPase activating protein 9                                                        | -3,944 | 4,255  |
| 226921_at   | UBR1            | ubiquitin protein ligase E3 component n-recognin 1                                     | 0,947  | 2,875  |
| 226929_at   | MTHFR           | methylenetetrahydrofolate reductase (NAD(P)H)                                          | 0,895  | 3,143  |
| 226948_at   | RHBDD1          | rhomboid domain containing 1                                                           | 2,461  | 3,102  |
| 226955_at   | AFAP1L1         | actin filament associated protein 1 like 1                                             | 1,651  | 8,374  |
| 226961_at   | PRR15           | proline rich 15                                                                        | 1,703  | 4,726  |
| 226974_at   | NEDD4L          | neural precursor cell expressed, developmentally down-regulated 4-like, E3 ubiquitin i | 3,584  | 10,928 |
| 226978_at   | PPARA           | peroxisome proliferator activated receptor alpha                                       | 1,635  | 3,115  |
| 226991_at   | NFATC2          | nuclear factor of activated T-cells 2                                                  | 3,438  | 6,853  |
| 227004_at   | CDKL5           | cyclin dependent kinase like 5                                                         | -2,85  | 2,943  |
| 227006_at   | PPP1R14A        | protein phosphatase 1 regulatory inhibitor subunit 14A                                 | 4,13   | 7,496  |
| 227009_at   | LOC100507431    | uncharacterized LOC100507431                                                           | -1,046 | 2,524  |
| 227010_at   |                 |                                                                                        | 1,139  | 3,472  |
| 227021_at   | KDM1B           | lysine demethylase 1B                                                                  | -1,742 | 3,461  |
| 227052_at   | SMIM14          | small integral membrane protein 14                                                     | -3,711 | 10,63  |
| 227087_at   | INPP4A          | inositol polyphosphate-4-phosphatase type I A                                          | -1,43  | 3,096  |
| 227111_at   | ZBTB34          | zinc finger and BTB domain containing 34                                               | -1,707 | 2,729  |
| 227116_at   | MON1B           | MON1 homolog B, secretory trafficking associated                                       | -1,005 | 3,387  |
| 227120_at   | FOXP4           | forkhead box P4                                                                        | 1,528  | 4,181  |
| 227127_at   | TMEM110-MUSTN   | TMEM110-MUSTN1 readthrough///transmembrane protein 110                                 | -1,457 | 2,485  |
| 227134_at   | SYTL1           | synaptotagmin like 1                                                                   | -2,346 | 3,342  |
| 227150_at   | MTF1            | metal regulatory transcription factor 1                                                | -2,379 | 2,569  |
| 227177_at   | CORO2A          | coronin 2A                                                                             | -2,968 | 3,396  |
| 227178_at   | CEL2F           | CUGBP, Elav-like family member 2                                                       | -2,486 | 8,275  |
| 227180_at   | ELOVL7          | ELOVL fatty acid elongase 7                                                            | 0,984  | 3,23   |
| 227184_at   | PTAFR           | platelet activating factor receptor                                                    | -4,506 | 2,946  |
| 227187_at   | CBLL1           | Cbl proto-oncogene like 1                                                              | 2,382  | 5,399  |
| 227188_at   | EVA1C           | eva-1 homolog C                                                                        | 2,498  | 4,979  |
| 227230_s_at | KIAA1211        | KIAA1211                                                                               | 4,813  | 5,583  |
| 227231_at   | KIAA1211        | KIAA1211                                                                               | 4,433  | 7,539  |
| 227235_at   | GUCY1A3         | guanylate cyclase 1 soluble subunit alpha                                              | 2,974  | 4,107  |
| 227236_at   | TSPAN2          | tetraspanin 2                                                                          | -4,469 | 3,308  |
| 227261_at   | KLF12           | Kruppel like factor 12                                                                 | 1,626  | 5,084  |
| 227264_at   | TRAF6           | TNF receptor associated factor 6                                                       | -1,037 | 2,829  |
| 227266_s_at | FYB             | FYN binding protein                                                                    | -4,24  | 5,004  |
| 227268_at   | RNFT1           | ring finger protein, transmembrane 1                                                   | -1,223 | 2,859  |
| 227270_at   | FAM200B         | family with sequence similarity 200 member B                                           | -2,575 | 3,05   |
| 227302_s_at | LLGL1///FLII    | LLGL1, scribble cell polarity complex component///FLII, actin remodeling protein       | -1,452 | 3,657  |
| 227304_at   | SMCR8           | Smith-Magenis syndrome chromosome region, candidate 8                                  | -1,271 | 4,908  |

|             |                |                                                                                   |        |       |
|-------------|----------------|-----------------------------------------------------------------------------------|--------|-------|
| 227306_at   | ACER2          | alkaline ceramidase 2                                                             | 0,786  | 3,44  |
| 227329_at   | ZBTB46         | zinc finger and BTB domain containing 46                                          | 3,148  | 6,425 |
| 227352_at   | SWSAP1         | SWIM-type zinc finger 7 associated protein 1                                      | -1,615 | 2,549 |
| 227353_at   | TMC8           | transmembrane channel like 8                                                      | -1,208 | 2,712 |
| 227354_at   | PAG1           | phosphoprotein membrane anchor with glycosphingolipid microdomains 1              | -4,078 | 3,035 |
| 227358_at   | ZBTB46         | zinc finger and BTB domain containing 46                                          | 1,153  | 3,915 |
| 227361_at   | H53ST3B1       | heparan sulfate-glucosamine 3-sulfotransferase 3B1                                | -4,306 | 4,846 |
| 227367_at   | SLCO3A1        | solute carrier organic anion transporter family member 3A1                        | -3,154 | 4,113 |
| 227383_at   | LOC727820      | uncharacterized LOC727820                                                         | -1,806 | 4,842 |
| 227384_s_at | LOC727820      | uncharacterized LOC727820                                                         | -1,689 | 3,62  |
| 227396_at   | PTPRJ          | protein tyrosine phosphatase, receptor type J                                     | -4,822 | 5,228 |
| 227408_s_at | SNX25          | sorting nexin 25                                                                  | 1,492  | 4,815 |
| 227410_at   | FAM43A         | family with sequence similarity 43 member A                                       | -3,687 | 8,884 |
| 227414_at   | RHBDD1         | rhomboid domain containing 1                                                      | 1,571  | 2,651 |
| 227426_at   | SOS1           | SOS Ras/Rac guanine nucleotide exchange factor 1                                  | 1,158  | 2,733 |
| 227436_at   | OTUD7B         | OTU deubiquitinase 7B                                                             | 2,018  | 3,994 |
| 227438_at   | ALPK1          | alpha kinase 1                                                                    | -2,246 | 2,603 |
| 227450_at   | ERP27          | endoplasmic reticulum protein 27                                                  | -2,795 | 3,633 |
| 227461_at   | STON2          | stonin 2                                                                          | 5,029  | 3,677 |
| 227466_at   | FAM200B        | family with sequence similarity 200 member B                                      | -1,18  | 5,113 |
| 227473_at   |                |                                                                                   | 2,2    | 6,054 |
| 227481_at   | CNKSR3         | CNKSR family member 3                                                             | 5,323  | 4,203 |
| 227482_at   | ADCK1          | aarF domain containing kinase 1                                                   | 1,611  | 5,353 |
| 227487_s_at | SERPINE2       | serpin family E member 2                                                          | 4,534  | 5,56  |
| 227489_at   | SMURF2         | SMAD specific E3 ubiquitin protein ligase 2                                       | -1,257 | 2,856 |
| 227490_at   | WDFY2          | WD repeat and FYVE domain containing 2                                            | -1,284 | 4,469 |
| 227491_at   | ELOVL6         | ELOVL fatty acid elongase 6                                                       | 4,224  | 8,216 |
| 227501_at   |                |                                                                                   | -2,111 | 4,926 |
| 227506_at   | SLC16A9        | solute carrier family 16 member 9                                                 | 3,437  | 4,779 |
| 227507_at   | ZNF592         | zinc finger protein 592                                                           | -1,728 | 3,266 |
| 227512_at   | MEX3A          | mex-3 RNA binding family member A                                                 | 2,005  | 5,526 |
| 227513_s_at | LRRFIP1        | LRR binding FLII interacting protein 1                                            | -1,667 | 4,128 |
| 227515_at   | STAMBP         | STAM binding protein                                                              | 1,107  | 4,042 |
| 227522_at   | CMBL           | carboxymethylenebutenolidase homolog                                              | 5,317  | 3,1   |
| 227524_at   | FZD3           | frizzled class receptor 3                                                         | 2,565  | 4,4   |
| 227553_at   | PIK3R5         | phosphoinositide-3-kinase regulatory subunit 5                                    | -5,185 | 4,385 |
| 227558_at   | CBX4           | chromobox 4                                                                       | -1,837 | 3,293 |
| 227602_at   | RAB7A          | RAB7A, member RAS oncogene family                                                 | -1,157 | 2,565 |
| 227624_at   | TET2           | tet methylcytosine dioxygenase 2                                                  | -1,452 | 3,049 |
| 227645_at   | PIK3R5         | phosphoinositide-3-kinase regulatory subunit 5                                    | -4,334 | 4,039 |
| 227647_at   | KCNE3          | potassium voltage-gated channel subfamily E regulatory subunit 3                  | -4,022 | 5,529 |
| 227649_s_at | SRGAP2C///SRGA | SLIT-ROBO Rho GTPase activating protein 2C///SLIT-ROBO Rho GTPase activating prot | -2,561 | 4,786 |
| 227654_at   | FAM65C         | family with sequence similarity 65 member C                                       | 4,14   | 8,519 |
| 227672_at   | MROH6          | maestro heat like repeat family member 6                                          | -1,888 | 2,998 |
| 227677_at   | JAK3           | Janus kinase 3                                                                    | -2,956 | 3,547 |
| 227692_at   | GNAI1          | G protein subunit alpha i1                                                        | 3,058  | 3,751 |
| 227698_s_at | RAB40C         | RAB40C, member RAS oncogene family                                                | -1,184 | 2,52  |
| 227703_s_at | SYTL4          | synaptotagmin like 4                                                              | 4,102  | 9,82  |
| 227717_at   | ARHGEF37       | Rho guanine nucleotide exchange factor 37                                         | 2,455  | 4,603 |
| 227725_at   | ST6GALNAC1     | ST6 N-acetylgalactosaminide alpha-2,6-sialyltransferase 1                         | 2,797  | 10,33 |
| 227745_at   | RNF139-AS1     | RNF139 antisense RNA 1 (head to head)                                             | 1,311  | 3,579 |
| 227752_at   | SPTLC3         | serine palmitoyltransferase long chain base subunit 3                             | 1,138  | 5,448 |
| 227757_at   | CUL4A          | cullin 4A                                                                         | 1,046  | 3,666 |
| 227761_at   | MYO5A          | myosin VA                                                                         | -4,294 | 5,086 |
| 227769_at   | GPR27          | G protein-coupled receptor 27                                                     | -2,56  | 3,909 |
| 227786_at   | MED30          | mediator complex subunit 30                                                       | -0,636 | 2,494 |
| 227806_at   | C16orf74       | chromosome 16 open reading frame 74                                               | -0,697 | 3,138 |
| 227817_at   | PRKCβ          | protein kinase C beta                                                             | -3,597 | 5,866 |
| 227819_at   | LGR6           | leucine rich repeat containing G protein-coupled receptor 6                       | 2,217  | 6,744 |
| 227820_at   | TBC1D25        | TBC1 domain family member 25                                                      | -1,311 | 2,573 |
| 227824_at   | PRKCβ          | protein kinase C beta                                                             | -3,041 | 4,342 |
| 227833_s_at | MBD6           | methyl-CpG binding domain protein 6                                               | -2,157 | 3,081 |
| 227857_at   | APMAP          | adipocyte plasma membrane associated protein                                      | -3,128 | 2,666 |
| 227877_at   | ANXA2R         | annexin A2 receptor                                                               | -1,423 | 2,988 |
| 227889_at   | LPCAT2         | lysophosphatidylcholine acyltransferase 2                                         | -3,895 | 8,328 |
| 227897_at   | RAP2B          | RAP2B, member of RAS oncogene family                                              | 1,239  | 2,443 |
| 227919_at   | UCA1           | urothelial cancer associated 1 (non-protein coding)                               | 3,697  | 7,313 |
| 227923_at   | SHANK3         | SH3 and multiple ankyrin repeat domains 3                                         | 0,921  | 2,699 |
| 227929_at   | LIN7A          | lin-7 homolog A, crumbs cell polarity complex component                           | -3,605 | 7,737 |
| 227930_at   | AGO4           | argonaute 4, RISC catalytic component                                             | -3,201 | 4,978 |
| 227934_at   | KPNA5          | karyopherin subunit alpha 5                                                       | 1,657  | 3,191 |
| 227945_at   | TBC1D1         | TBC1 domain family member 1                                                       | -2,128 | 3,438 |
| 227948_at   | FGD4           | FYVE, RhoGEF and PH domain containing 4                                           | -3,463 | 3,245 |
| 227953_at   | CMTM6          | CKLF like MARVEL transmembrane domain containing 6                                | -2,64  | 4,555 |
| 227957_at   | GSN            | gelsolin                                                                          | -2,578 | 2,898 |
| 227958_s_at | GSN            | gelsolin                                                                          | -2,964 | 3,015 |
| 227959_at   | ANKRD9         | ankyrin repeat domain 9                                                           | 1,916  | 4,743 |
| 227968_at   | PDDC1          | Parkinson disease 7 domain containing 1                                           | 1,386  | 2,518 |
| 227981_at   | CYB561D1       | cytochrome b561 family member D1                                                  | -1,603 | 2,699 |
| 227983_at   | RILPL2         | Rab interacting lysosomal protein like 2                                          | -1,562 | 5,429 |
| 227985_at   | LOC100506098   | uncharacterized LOC100506098                                                      | 1,995  | 2,911 |
| 227989_at   | LTBP4          | latent transforming growth factor beta binding protein 4                          | 0,863  | 2,683 |
| 228001_at   | TMEM50B        | transmembrane protein 50B                                                         | -1,128 | 2,527 |
| 228046_at   | ZNF827         | zinc finger protein 827                                                           | 3,094  | 3,08  |
| 228052_x_at | TCF3           | transcription factor 3                                                            | 2,126  | 3,388 |
| 228066_at   | C17orf96       | chromosome 17 open reading frame 96                                               | 2,42   | 4,947 |
| 228084_at   | PLA2G12A       | phospholipase A2 group XIIA                                                       | 3,096  | 3,19  |
| 228087_at   | CCDC126        | coiled-coil domain containing 126                                                 | -2,591 | 2,46  |
| 228089_x_at | MIR6748///TMEM | microRNA 6748///transmembrane protein 179B                                        | -1,516 | 3,927 |
| 228090_at   | NMNAT3         | nicotinamide nucleotide adenyltransferase 3                                       | 3,477  | 2,457 |
| 228091_at   | STX17          | syntaxin 17                                                                       | 1,171  | 3,001 |
| 228107_at   | C8orf88        | chromosome 8 open reading frame 88                                                | 2,335  | 4,664 |
| 228108_at   | PPM1L          | protein phosphatase, Mg2+/Mn2+ dependent 1L                                       | 1,879  | 2,736 |
| 228111_s_at | DNAH1          | dynein axonemal heavy chain 1                                                     | -2,392 | 5,236 |
| 228112_at   | DNAH1          | dynein axonemal heavy chain 1                                                     | -1,63  | 3,457 |
| 228139_at   | RIPK3          | receptor interacting serine/threonine kinase 3                                    | -2,797 | 3,782 |
| 228156_at   |                |                                                                                   | -1,687 | 2,68  |
| 228159_at   | WDFY2          | WD repeat and FYVE domain containing 2                                            | -1,587 | 5,276 |
| 228161_at   | RAB32          | RAB32, member RAS oncogene family                                                 | -2,879 | 3,944 |
| 228163_at   | ST6GALNAC4     | ST6 N-acetylgalactosaminide alpha-2,6-sialyltransferase 4                         | 0,913  | 2,769 |
| 228171_s_at | PLEKHG4        | pleckstrin homology and RhoGEF domain containing G4                               | 1,935  | 4,945 |
| 228172_at   | TTL11          | tubulin tyrosine ligase like 11                                                   | 0,807  | 2,524 |



|             |                                                                                        |                                                                           |        |        |
|-------------|----------------------------------------------------------------------------------------|---------------------------------------------------------------------------|--------|--------|
| 228174_at   | SCAI                                                                                   | suppressor of cancer cell invasion                                        | 2,544  | 3,143  |
| 228179_at   | UTP4///HAS3                                                                            | UTP4, small subunit processome component///hyaluronan synthase 3          | 1,022  | 3,023  |
| 228188_at   | FOSL2                                                                                  | FOS like 2, AP-1 transcription factor subunit                             | -4,537 | 4,942  |
| 228195_at   | C2orf88                                                                                | chromosome 2 open reading frame 88                                        | 3,013  | 10,186 |
| 228231_at   | MIR6836///SNX8                                                                         | microRNA 6836///sorting nexin 8                                           | 1,508  | 2,604  |
| 228244_at   | BLOC1S3                                                                                | biogenesis of lysosomal organelles complex 1 subunit 3                    | -1,344 | 3,032  |
| 228246_s_at | SPTBN1                                                                                 | spectrin beta, non-erythrocytic 1                                         | -2,272 | 5,252  |
| 228255_at   | TMEM237                                                                                | transmembrane protein 237                                                 | 1,98   | 3,463  |
| 228256_s_at | EPB41L4A                                                                               | erythrocyte membrane protein band 4.1 like 4A                             | 1,489  | 2,48   |
| 228258_at   | TBC1D10C                                                                               | TBC1 domain family member 10C                                             | -3,415 | 2,889  |
| 228295_at   | WDR59                                                                                  | WD repeat domain 59                                                       | 1,875  | 3,928  |
| 228297_at   | CNN3                                                                                   | calponin 3                                                                | 1,55   | 5,167  |
| 228303_at   | GALNT6                                                                                 | polypeptide N-acetylgalactosaminyltransferase 6                           | 2,987  | 3,595  |
| 228306_at   | CNIH4                                                                                  | cornichon family AMPA receptor auxiliary protein 4                        | -2,016 | 2,752  |
| 228309_at   | APMAP                                                                                  | adipocyte plasma membrane associated protein                              | -2,284 | 3,003  |
| 228317_at   | ZFAND5                                                                                 | zinc finger AN1-type containing 5                                         | -1,989 | 5,149  |
| 228325_at   | SPIDR                                                                                  | scaffolding protein involved in DNA repair                                | -2,605 | 2,923  |
| 228353_x_at | UBASH3B                                                                                | ubiquitin associated and SH3 domain containing B                          | -1,669 | 2,962  |
| 228354_at   | MORN4                                                                                  | MORN repeat containing 4                                                  | 1,233  | 4,466  |
| 228359_at   | UBASH3B                                                                                | ubiquitin associated and SH3 domain containing B                          | -2,547 | 5,352  |
| 228362_s_at | FAM26F                                                                                 | family with sequence similarity 26 member F                               | -2,679 | 3,003  |
| 228369_at   | CNPY3                                                                                  | canopy FGF signaling regulator 3                                          | -1,346 | 2,998  |
| 228370_at   | LOC101930404///SNORD116-28///SNORD115-26///SNORD115-13///SNORD115-7///SNORD116-22///SN |                                                                           | 3,763  | 2,954  |
| 228385_at   | DDX59                                                                                  | DEAD-box helicase 59                                                      | -1,65  | 3,444  |
| 228386_s_at | DDX59                                                                                  | DEAD-box helicase 59                                                      | -1,572 | 3,952  |
| 228391_at   | CYP4V2                                                                                 | cytochrome P450 family 4 subfamily V member 2                             | 1,921  | 2,668  |
| 228394_at   | STK10                                                                                  | serine/threonine kinase 10                                                | -2,527 | 2,944  |
| 228410_at   | GAB3                                                                                   | GRB2 associated binding protein 3                                         | 0,826  | 2,618  |
| 228412_at   | LOC643072                                                                              | uncharacterized LOC643072                                                 | -1,869 | 3,966  |
| 228416_at   | ACVR2A                                                                                 | activin A receptor type 2A                                                | 1,805  | 5,571  |
| 228423_at   | MAP9                                                                                   | microtubule associated protein 9                                          | 0,992  | 2,933  |
| 228430_at   | BOLA3-AS1                                                                              | BOLA3 antisense RNA 1 (head to head)                                      | 3,004  | 7,856  |
| 228432_at   | RAB31P                                                                                 | RAB3A interacting protein                                                 | -2,564 | 3,705  |
| 228437_at   | CNIH4                                                                                  | cornichon family AMPA receptor auxiliary protein 4                        | -1,767 | 4,204  |
| 228442_at   | NFATC2                                                                                 | nuclear factor of activated T-cells 2                                     | 2,065  | 5,077  |
| 228471_at   | ANKRD44                                                                                | ankyrin repeat domain 44                                                  | -3,52  | 4,075  |
| 228486_at   | SLC44A1                                                                                | solute carrier family 44 member 1                                         | -3,162 | 2,712  |
| 228487_s_at |                                                                                        |                                                                           | 1,677  | 2,455  |
| 228494_at   | PPP1R9A                                                                                | protein phosphatase 1 regulatory subunit 9A                               | 0,849  | 3,085  |
| 228497_at   | SLC22A15                                                                               | solute carrier family 22 member 15                                        | -3,538 | 10,31  |
| 228519_x_at | CIRBP                                                                                  | cold inducible RNA binding protein                                        | -1,322 | 2,957  |
| 228521_s_at | MIA-RAB4B///RAB                                                                        | MIA-RAB4B readthrough (NMD candidate)///RAB4B, member RAS oncogene family | -1,925 | 2,574  |
| 228525_at   | LRP3                                                                                   | LDL receptor related protein 3                                            | -1,175 | 3,252  |
| 228532_at   | C1orf162                                                                               | chromosome 1 open reading frame 162                                       | -4,49  | 6,973  |
| 228542_at   | MRS2                                                                                   | MRS2, magnesium transporter                                               | 1,857  | 2,623  |
| 228572_at   | GRB2                                                                                   | growth factor receptor bound protein 2                                    | -1,999 | 2,876  |
| 228573_at   | ANTXR2                                                                                 | anthrax toxin receptor 2                                                  | -4,112 | 6,464  |
| 228585_at   | ENTPD1                                                                                 | ectonucleoside triphosphate diphosphohydrolase 1                          | -4,203 | 4,53   |
| 228586_at   |                                                                                        |                                                                           | 3,307  | 6,263  |
| 228598_at   | DPP10                                                                                  | dipeptidyl peptidase like 10                                              | 3,109  | 10,473 |
| 228605_at   | UBXN2A                                                                                 | UBX domain protein 2A                                                     | 1,593  | 3,51   |
| 228615_at   | LOC286161                                                                              | uncharacterized LOC286161                                                 | 1,369  | 3,614  |
| 228618_at   | PEAR1                                                                                  | platelet endothelial aggregation receptor 1                               | 4,477  | 5,783  |
| 228648_at   | LRG1                                                                                   | leucine rich alpha-2-glycoprotein 1                                       | -3,788 | 4,885  |
| 228664_at   | TRIM52-AS1                                                                             | TRIM52 antisense RNA 1 (head to head)                                     | 0,66   | 2,539  |
| 228667_at   | AGPAT4                                                                                 | 1-acylglycerol-3-phosphate O-acyltransferase 4                            | 1,985  | 2,591  |
| 228670_at   | TEP1                                                                                   | telomerase associated protein 1                                           | -1,202 | 2,802  |
| 228685_at   | IL17RA                                                                                 | interleukin 17 receptor A                                                 | -4,265 | 4,144  |
| 228700_at   | CXorf38                                                                                | chromosome X open reading frame 38                                        | -1,186 | 3,465  |
| 228708_at   | RAB27B                                                                                 | RAB27B, member RAS oncogene family                                        | 0,779  | 2,559  |
| 228716_at   | THRB                                                                                   | thyroid hormone receptor beta                                             | 3,379  | 7,624  |
| 228717_at   |                                                                                        |                                                                           | 1,31   | 3,293  |
| 228723_at   | NPTN-IT1                                                                               | NPTN intronic transcript 1                                                | -1,563 | 2,442  |
| 228727_at   | ANXA11                                                                                 | annexin A11                                                               | -3,239 | 2,952  |
| 228728_at   | CPED1                                                                                  | cadherin like and PC-esterase domain containing 1                         | 1,174  | 4,521  |
| 228741_s_at | HCN3                                                                                   | hyperpolarization activated cyclic nucleotide gated potassium channel 3   | 4,883  | 7,738  |
| 228749_at   | ZDBF2                                                                                  | zinc finger DBF-type containing 2                                         | 0,839  | 3,249  |
| 228766_at   | CD36                                                                                   | CD36 molecule                                                             | 5,755  | 4,504  |
| 228770_at   | GPR146                                                                                 | G protein-coupled receptor 146                                            | 2,049  | 3,559  |
| 228792_at   | MYEF2                                                                                  | myelin expression factor 2                                                | 1,384  | 5,201  |
| 228795_at   | PRKCB                                                                                  | protein kinase C beta                                                     | -3,343 | 5,548  |
| 228802_at   | RBPMS2                                                                                 | RNA binding protein with multiple splicing 2                              | 5,298  | 6,615  |
| 228813_at   | HDAC4                                                                                  | histone deacetylase 4                                                     | -2,326 | 4,894  |
| 228821_at   | ST6GAL2                                                                                | ST6 beta-galactoside alpha-2,6-sialyltransferase 2                        | 3,431  | 11,789 |
| 228843_at   | ARL10                                                                                  | ADP ribosylation factor like GTPase 10                                    | 1,953  | 4,161  |
| 228869_at   | SNX20                                                                                  | sorting nexin 20                                                          | -2,621 | 4,59   |
| 228900_at   | SPECC1                                                                                 | sperm antigen with calponin homology and coiled-coil domains 1            | 1,586  | 3,144  |
| 228904_at   | HOXB3                                                                                  | homeobox B3                                                               | 1,419  | 5,641  |
| 228906_at   | TET1                                                                                   | tet methylcytosine dioxygenase 1                                          | 2,596  | 4,139  |
| 228921_at   | SLC25A42                                                                               | solute carrier family 25 member 42                                        | 0,97   | 3,187  |
| 228946_at   | INTU                                                                                   | inturned planar cell polarity protein                                     | 1,566  | 2,555  |
| 228951_at   | SLC38A7                                                                                | solute carrier family 38 member 7                                         | 1,227  | 2,925  |
| 228989_at   | TYMSOS                                                                                 | TYMS opposite strand                                                      | 1,097  | 2,977  |
| 229006_at   | LOC100507487                                                                           | uncharacterized LOC100507487                                              | 1,765  | 4,67   |
| 229010_at   | CBL                                                                                    | Cbl proto-oncogene                                                        | -4,717 | 6,6    |
| 229016_s_at | TRERF1                                                                                 | transcriptional regulating factor 1                                       | -2,409 | 3,764  |
| 229052_at   | ANKRD23///ANKR                                                                         | ankyrin repeat domain 23///ankyrin repeat domain 39                       | 1,007  | 4,031  |
| 229062_at   | ARL9                                                                                   | ADP ribosylation factor like GTPase 9                                     | 1,428  | 5,371  |
| 229067_at   |                                                                                        |                                                                           | -1,766 | 2,774  |
| 229077_at   | KATNB1                                                                                 | katanin regulatory subunit B1                                             | 0,84   | 3,295  |
| 229098_s_at | C5orf24                                                                                | chromosome 5 open reading frame 24                                        | 0,687  | 2,729  |
| 229101_at   | IL17RA                                                                                 | interleukin 17 receptor A                                                 | -4,945 | 5,336  |
| 229126_at   | TMEM19                                                                                 | transmembrane protein 19                                                  | 1,529  | 3,409  |
| 229131_at   | EXD2                                                                                   | exonuclease 3'-5' domain containing 2                                     | 1,333  | 2,594  |
| 229132_at   | MINA                                                                                   | MYC induced nuclear antigen                                               | 1,239  | 2,663  |
| 229134_at   | VANGL1                                                                                 | VANGL planar cell polarity protein 1                                      | 2,472  | 3,588  |
| 229135_at   | FASTKD2                                                                                | FAST kinase domains 2                                                     | 1,384  | 3,154  |
| 229151_at   | SLC14A1                                                                                | solute carrier family 14 member 1 (Kidd blood group)                      | 4,035  | 10,411 |
| 229165_at   | MRPL12                                                                                 | mitochondrial ribosomal protein L12                                       | 1,565  | 2,445  |
| 229213_at   | DIRC2                                                                                  | disrupted in renal carcinoma 2                                            | -2,659 | 2,674  |
| 229215_at   | ASCL2                                                                                  | achaete-scute family bHLH transcription factor 2                          | -1,474 | 3,292  |
| 229219_s_at |                                                                                        |                                                                           | -1,206 | 2,603  |

|             |                 |                                                                                 |        |       |
|-------------|-----------------|---------------------------------------------------------------------------------|--------|-------|
| 229287_at   | PCNX1           | pecanex homolog 1 (Drosophila)                                                  | -2,44  | 3,291 |
| 229295_at   | IL17RA          | interleukin 17 receptor A                                                       | -5,245 | 5,564 |
| 229311_at   | GKAP1           | G kinase anchoring protein 1                                                    | 1,027  | 2,535 |
| 229326_at   | TNFSF12-TNFSF13 | TNFSF12-TNFSF13 readthrough///tumor necrosis factor superfamily member 12///tur | -2,818 | 8,273 |
| 229332_at   | HPDL            | 4-hydroxyphenylpyruvate dioxygenase like                                        | 1,767  | 3,724 |
| 229368_s_at | ZFAND5          | zinc finger AN1-type containing 5                                               | -1,501 | 4,05  |
| 229373_at   |                 |                                                                                 | -4,665 | 9,05  |
| 229377_at   | GRTP1           | growth hormone regulated TBC protein 1                                          | 3,809  | 9,86  |
| 229378_at   | STOX1           | storkhead box 1                                                                 | 1,301  | 3,992 |
| 229389_at   | ATG16L2         | autophagy related 16 like 2                                                     | -4,022 | 4,981 |
| 229390_at   | FAM26F          | family with sequence similarity 26 member F                                     | -3,936 | 4,079 |
| 229391_s_at | FAM26F          | family with sequence similarity 26 member F                                     | -2,604 | 3,267 |
| 229392_s_at | PIK3R2          | phosphoinositide-3-kinase regulatory subunit 2                                  | 1,792  | 2,657 |
| 229424_s_at | ARHGAP27        | Rho GTPase activating protein 27                                                | -3,271 | 2,889 |
| 229429_x_at | LINC00623       | long intergenic non-protein coding RNA 623                                      | -1,587 | 4,625 |
| 229464_at   | MYEF2           | myelin expression factor 2                                                      | 3,312  | 2,46  |
| 229471_s_at |                 |                                                                                 | 1,263  | 3,475 |
| 229474_at   | MICAL3          | microtubule associated monoxygenase, calponin and LIM domain containing 3       | 2,004  | 6,683 |
| 229483_at   |                 |                                                                                 | -2,725 | 2,567 |
| 229488_at   | OTUD7B          | OTU deubiquitinase 7B                                                           | 1,896  | 5,773 |
| 229492_at   | VANGL1          | VANGL planar cell polarity protein 1                                            | 4,436  | 3,921 |
| 229506_at   | PPM1L           | protein phosphatase, Mg2+/Mn2+ dependent 1L                                     | 1,373  | 3,165 |
| 229530_at   | GUCY1A3         | guanylate cyclase 1 soluble subunit alpha                                       | 2,459  | 3,662 |
| 229534_at   | ACOT4           | acyl-CoA thioesterase 4                                                         | 1,832  | 6,774 |
| 229543_at   | FAM26F          | family with sequence similarity 26 member F                                     | -3,944 | 4,172 |
| 229547_s_at | WNK2            | WNK lysine deficient protein kinase 2                                           | 0,662  | 2,607 |
| 229555_at   | GALNT5          | polypeptide N-acetylgalactosaminyltransferase 5                                 | 1,37   | 4,104 |
| 229582_at   | INO80C          | INO80 complex subunit C                                                         | 0,996  | 3,328 |
| 229597_s_at | WDFY4           | WDFY family member 4                                                            | -2,839 | 3,253 |
| 229622_at   | ERFE            | erythroferrone                                                                  | 2,212  | 6,655 |
| 229623_at   | TMEM150C        | transmembrane protein 150C                                                      | 4,131  | 6,483 |
| 229647_at   | NDUFS1          | NADH:ubiquinone oxidoreductase core subunit 51                                  | 1,428  | 2,776 |
| 229654_at   |                 |                                                                                 | 1,696  | 3,215 |
| 229657_at   | THRB            | thyroid hormone receptor beta                                                   | 2,804  | 6,22  |
| 229664_at   | MAPK8           | mitogen-activated protein kinase 8                                              | 1,125  | 2,707 |
| 229670_at   |                 |                                                                                 | -3,28  | 8,704 |
| 229675_at   | MINA            | MYC induced nuclear antigen                                                     | 2,217  | 2,499 |
| 229695_at   |                 |                                                                                 | -3,319 | 5,467 |
| 229696_at   | FECH            | ferrochelatase                                                                  | 1,523  | 5,038 |
| 229699_at   | LOC100129550    | uncharacterized LOC100129550                                                    | -2,532 | 3,379 |
| 229713_at   | PIP4K2A         | phosphatidylinositol-5-phosphate 4-kinase type 2 alpha                          | 0,931  | 2,469 |
| 229716_at   | UBXN10-AS1      | UBXN10 antisense RNA 1                                                          | 2,335  | 6,725 |
| 229723_at   | TAGAP           | T-cell activation RhoGTPase activating protein                                  | -3,748 | 2,462 |
| 229762_at   |                 |                                                                                 | -1,256 | 2,481 |
| 229770_at   | GLT1D1          | glycosyltransferase 1 domain containing 1                                       | -6,278 | 4,102 |
| 229776_at   | SLCO3A1         | solute carrier organic anion transporter family member 3A1                      | -2,771 | 2,681 |
| 229780_at   | MTSS1           | metastasis suppressor 1                                                         | 1,68   | 5,848 |
| 229791_at   | LPCAT2          | lysophosphatidylcholine acyltransferase 2                                       | -3,818 | 8,854 |
| 229793_at   | ASAH2B          | N-acylsphingosine amidohydrolase 2B                                             | 2,171  | 6,797 |
| 229798_s_at | BRI3            | brain protein I3                                                                | -3,184 | 2,983 |
| 229806_at   | QRICH1          | glutamine rich 1                                                                | 0,851  | 2,582 |
| 229821_at   | LRRC37A4P       | leucine rich repeat containing 37 member A4, pseudogene                         | -2,52  | 3,924 |
| 229822_at   | PARVB           | parvin beta                                                                     | 2,971  | 2,957 |
| 229834_at   | NFIX            | nuclear factor I X                                                              | 0,663  | 2,458 |
| 229835_s_at | PRELID3B        | PRELI domain containing 3B                                                      | 1,348  | 3,524 |
| 229841_at   |                 |                                                                                 | 1,59   | 2,907 |
| 229849_at   | WIPF3           | WAS/WASL interacting protein family member 3                                    | 2,931  | 6,921 |
| 229864_at   | ELP6            | elongator acetyltransferase complex subunit 6                                   | 1,611  | 2,895 |
| 229865_at   | LOC101928615/// | uncharacterized LOC101928615///fibronectin type III domain containing 3B        | -3,479 | 6,878 |
| 229872_s_at | LOC100996740    | uncharacterized LOC100996740                                                    | -1,279 | 3,224 |
| 229877_at   | NEO1            | neogenin 1                                                                      | 1,066  | 3,202 |
| 229881_at   | KLF12           | Kruppel like factor 12                                                          | 1,762  | 4,625 |
| 229921_at   | KIF5A           | kinesin family member 5A                                                        | 0,74   | 2,444 |
| 229934_at   |                 |                                                                                 | -3,339 | 3,144 |
| 229937_x_at |                 |                                                                                 | -2,561 | 2,531 |
| 229953_x_at | LCA5            | LCA5, lebercilin                                                                | 2,557  | 8,356 |
| 229988_at   |                 |                                                                                 | -0,838 | 2,514 |
| 229991_s_at | SYTL4           | synaptotagmin like 4                                                            | 1,8    | 3,835 |
| 229994_at   | NFIA            | nuclear factor I A                                                              | 5,385  | 4,101 |
| 229997_at   | VANGL1          | VANGL planar cell polarity protein 1                                            | 3,027  | 4,276 |
| 230047_at   | ARHGAP42        | Rho GTPase activating protein 42                                                | 1,482  | 4,401 |
| 230052_s_at | NFKBID          | NFKB inhibitor delta                                                            | -2,595 | 2,488 |
| 230053_at   |                 |                                                                                 | 1,891  | 5,919 |
| 230054_at   | LOC100507547/// | uncharacterized LOC100507547///proline rich transmembrane protein 1             | 1,594  | 4,001 |
| 230086_at   | FNBP1           | formin binding protein 1                                                        | -1,976 | 4,469 |
| 230092_at   | UBXN10          | UBX domain protein 10                                                           | 2,515  | 7,695 |
| 230095_at   | GLRX3           | glutaredoxin 3                                                                  | 1,517  | 3,784 |
| 230100_x_at | PAK1            | p21 (RAC1) activated kinase 1                                                   | -2,593 | 2,468 |
| 230129_at   | PSTK            | phosphoserine-tRNA kinase                                                       | 1,619  | 4,129 |
| 230138_at   | NCS1            | neuronal calcium sensor 1                                                       | 1,266  | 4,446 |
| 230146_s_at | NCS1            | neuronal calcium sensor 1                                                       | 0,724  | 2,453 |
| 230175_s_at | DCBLD2          | discoidin, CUB and LCCL domain containing 2                                     | 1,69   | 2,7   |
| 230182_at   | PDCD7           | programmed cell death 7                                                         | 0,754  | 2,568 |
| 230190_at   | NDFIP2          | Nedd4 family interacting protein 2                                              | 1,022  | 2,464 |
| 230209_at   | ZXDC            | ZXD family zinc finger C                                                        | -1,018 | 2,826 |
| 230210_at   | SUN1            | Sad1 and UNC84 domain containing 1                                              | 2,53   | 8,869 |
| 230224_at   | ZCCHC18         | zinc finger CCHC-type containing 18                                             | 2,468  | 5,936 |
| 230234_at   | FXN             | frataxin                                                                        | 1,88   | 3,676 |
| 230240_at   |                 |                                                                                 | 2,038  | 7,037 |
| 230252_at   | LPAR5           | lysophosphatidic acid receptor 5                                                | 1,704  | 7,027 |
| 230264_s_at | AP1S2           | adaptor related protein complex 1 sigma 2 subunit                               | -3,233 | 7,31  |
| 230268_at   |                 |                                                                                 | 1,705  | 4,373 |
| 230282_at   | TSPAN3          | tetraspanin 3                                                                   | -2,848 | 4,397 |
| 230305_at   | DNAJC15         | DnaJ heat shock protein family (Hsp40) member C15                               | 1,089  | 4,317 |
| 230316_at   | SEC14L2         | SEC14 like lipid binding 2                                                      | 0,928  | 3,471 |
| 230327_at   | LOC730098       | uncharacterized LOC730098                                                       | -0,597 | 2,635 |
| 230339_at   | CCDC138         | coiled-coil domain containing 138                                               | 1,401  | 3,378 |
| 230377_s_at | TBC1D2B         | TBC1 domain family member 2B                                                    | -1,717 | 2,58  |
| 230413_s_at |                 |                                                                                 | -3,185 | 6,938 |
| 230435_at   | FAM228B         | family with sequence similarity 228 member B                                    | -1,439 | 3,357 |
| 230436_s_at | CENPV           | centromere protein V                                                            | 1,154  | 3,209 |
| 230437_s_at | PRKCB           | protein kinase C beta                                                           | -2,971 | 3,983 |

|             |                 |                                                                                       |        |        |
|-------------|-----------------|---------------------------------------------------------------------------------------|--------|--------|
| 230444_at   | PDE7A           | phosphodiesterase 7A                                                                  | -1,529 | 2,849  |
| 230453_s_at | ATP2A3          | ATPase sarcoplasmic/endoplasmic reticulum Ca2+ transporting 3                         | -2,268 | 4,801  |
| 230472_at   | IRX1            | iroquois homeobox 1                                                                   | 3,024  | 7,973  |
| 230507_at   | ATXN1           | ataxin 1                                                                              | -1,793 | 4,299  |
| 230509_at   | SNX22           | sorting nexin 22                                                                      | 1,675  | 4,328  |
| 230523_at   | QSOX1           | quiescin sulphydryl oxidase 1                                                         | -2,439 | 3,074  |
| 230532_at   | CXorf38         | chromosome X open reading frame 38                                                    | -1,961 | 4,312  |
| 230550_at   | MS4A6A          | membrane spanning 4-domains A6A                                                       | -4,53  | 2,844  |
| 230559_x_at | FGD4            | FYVE, RhoGEF and PH domain containing 4                                               | -3,811 | 3,391  |
| 230563_at   | RASGEF1A        | RasGEF domain family member 1A                                                        | -2,571 | 2,805  |
| 230569_at   | CFAP97          | cilia and flagella associated protein 97                                              | 2,579  | 4,444  |
| 230575_at   | MSRB2           | methionine sulfoxide reductase B2                                                     | -2,195 | 2,915  |
| 230624_at   | SLC25A27        | solute carrier family 25 member 27                                                    | 1,029  | 2,99   |
| 230697_at   | BBS5            | Bardet-Biedl syndrome 5                                                               | 1,792  | 4,462  |
| 230702_at   |                 |                                                                                       | 1,134  | 3,424  |
| 230709_x_at | ZBTB7A          | zinc finger and BTB domain containing 7A                                              | 0,732  | 2,815  |
| 230720_at   | RNF182          | ring finger protein 182                                                               | 5,674  | 7,062  |
| 230729_at   |                 |                                                                                       | -1,158 | 2,54   |
| 230736_at   | SVIL-AS1        | SVIL antisense RNA 1                                                                  | -1,866 | 2,988  |
| 230767_at   |                 |                                                                                       | 1,925  | 5,19   |
| 230773_at   | ZNF385D         | zinc finger protein 385D                                                              | 2,669  | 8,849  |
| 230782_at   | SORD            | sorbitol dehydrogenase                                                                | 1,152  | 3,813  |
| 230800_at   | ADCY4           | adenylate cyclase 4                                                                   | -3,346 | 2,883  |
| 230837_at   | LOC100132057    | phosphodiesterase 4D interacting protein pseudogene                                   | -1,504 | 3,254  |
| 230840_at   | SMIM1           | small integral membrane protein 1 (Vel blood group)                                   | 1,496  | 5,166  |
| 230856_at   | ARSG            | arylsulfatase G                                                                       | -3,379 | 4,186  |
| 230866_at   | CYSLTR1         | cysteinyl leukotriene receptor 1                                                      | -2,899 | 4,172  |
| 230867_at   | COL6A6          | collagen type VI alpha 6 chain                                                        | 2,296  | 6,575  |
| 230872_s_at | ARPC4-TTL3///TT | ARPC4-TTL3 readthrough///tubulin tyrosine ligase like 3///actin related protein 2/3 c | -1,895 | 2,449  |
| 230881_at   | CCDC42          | coiled-coil domain containing 42                                                      | 1,096  | 3,528  |
| 230917_at   | PLCG2           | phospholipase C gamma 2                                                               | -3,473 | 2,872  |
| 230955_s_at | NOL4L           | nucleolar protein 4 like                                                              | 1,094  | 4,182  |
| 230958_s_at |                 |                                                                                       | 5,601  | 3,537  |
| 230972_at   | ANKRD9          | ankyrin repeat domain 9                                                               | 2,638  | 3,733  |
| 230986_at   | KLF8            | Kruppel like factor 8                                                                 | 1,104  | 4,408  |
| 230988_at   | ADD2            | adducin 2                                                                             | 2,621  | 6,971  |
| 230995_at   | CMBL            | carboxymethylenebutenolidase homolog                                                  | 1,268  | 4,553  |
| 230999_at   | ST3GAL4-AS1     | ST3GAL4 antisense RNA 1 (head to head)                                                | -1,991 | 2,649  |
| 231035_s_at | OTUD1           | OTU deubiquitinase 1                                                                  | -1,614 | 2,907  |
| 231065_at   | PDE6D           | phosphodiesterase 6D                                                                  | -1,668 | 2,461  |
| 231099_at   | FKBP15          | FK506 binding protein 15                                                              | -2,692 | 3,961  |
| 231109_at   |                 |                                                                                       | -3,854 | 6,282  |
| 231119_at   | RFC3            | replication factor C subunit 3                                                        | 0,982  | 2,638  |
| 231145_at   | PAX9            | paired box 9                                                                          | 1,843  | 5,298  |
| 231198_at   | CDK6            | cyclin dependent kinase 6                                                             | 1,189  | 2,976  |
| 231246_at   |                 |                                                                                       | 1,156  | 3,025  |
| 231247_s_at | LOC727820       | uncharacterized LOC727820                                                             | -1,745 | 4,576  |
| 231254_at   |                 |                                                                                       | 0,935  | 2,889  |
| 231283_at   | MGAT4A          | mannosyl (alpha-1,3-)-glycoprotein beta-1,4-N-acetylglucosaminyltransferase, isozym   | -3,681 | 4,775  |
| 231295_at   | ME3             | malic enzyme 3                                                                        | 1,271  | 3,411  |
| 231296_at   |                 |                                                                                       | 0,922  | 4,142  |
| 231309_at   |                 |                                                                                       | 1,361  | 3,842  |
| 231311_at   |                 |                                                                                       | 2,071  | 6,834  |
| 231340_at   |                 |                                                                                       | -2,374 | 3,168  |
| 231386_at   | FAM228A         | family with sequence similarity 228 member A                                          | -1,135 | 3,058  |
| 231411_at   | LHFP            | lipoma HMGIC fusion partner                                                           | 3,175  | 5,551  |
| 231436_at   | LOC101928134    | uncharacterized LOC101928134                                                          | 4,14   | 9,095  |
| 231465_at   |                 |                                                                                       | 1,067  | 2,464  |
| 231484_at   |                 |                                                                                       | -3,019 | 5,098  |
| 231493_at   |                 |                                                                                       | 0,906  | 2,472  |
| 231513_at   |                 |                                                                                       | -4,266 | 2,933  |
| 231541_s_at | SPAG5-AS1       | SPAG5 antisense RNA 1                                                                 | -0,915 | 2,811  |
| 231543_at   | PLEKHA8         | pleckstrin homology domain containing A8                                              | 1,133  | 2,873  |
| 231544_s_at | POLR3G          | RNA polymerase III subunit G                                                          | 1,065  | 2,983  |
| 231553_s_at | MICAL3          | microtubule associated monooxygenase, calponin and LIM domain containing 3            | 1,205  | 2,894  |
| 231579_s_at | TIMP2           | TIMP metalloproteinase inhibitor 2                                                    | -5,757 | 8,96   |
| 231616_at   |                 |                                                                                       | 1,159  | 3,851  |
| 231633_at   |                 |                                                                                       | 1,372  | 5,443  |
| 231642_at   | C6orf201        | chromosome 6 open reading frame 201                                                   | 1,472  | 3,514  |
| 231698_at   | LOC647115       | translation initiation factor IF-2                                                    | -1,459 | 2,655  |
| 231711_at   | ACPP            | acid phosphatase, prostate                                                            | -3,241 | 4,2    |
| 231747_at   | CYSLTR1         | cysteinyl leukotriene receptor 1                                                      | -3,525 | 3,86   |
| 231767_at   | HOXB4           | homeobox B4                                                                           | 1,931  | 4,102  |
| 231769_at   | FBXO6           | F-box protein 6                                                                       | -2,616 | 2,643  |
| 231779_at   | IRAK2           | interleukin 1 receptor associated kinase 2                                            | -4,425 | 5,495  |
| 231780_at   | GBGT1           | globoside alpha-1,3-N-acetylgalactosaminyltransferase 1                               | 2,685  | 4,694  |
| 231791_at   | ASAH2B          | N-acylsphingosine amidohydrolase 2B                                                   | 4,291  | 9,961  |
| 231801_at   | NFATC2          | nuclear factor of activated T-cells 2                                                 | 2,609  | 7,835  |
| 231826_at   | RALGAPA2        | Ral GTPase activating protein catalytic alpha subunit 2                               | -1,091 | 2,691  |
| 231835_at   | FAM213B         | family with sequence similarity 213 member B                                          | 2,403  | 5,741  |
| 231880_at   | STRIP2          | striatin interacting protein 2                                                        | 1,085  | 4,051  |
| 231885_at   | ZNF451          | zinc finger protein 451                                                               | 1,407  | 3,324  |
| 231902_at   | ZNF827          | zinc finger protein 827                                                               | 1,019  | 3,667  |
| 231923_at   | TMEM150C        | transmembrane protein 150C                                                            | 2,267  | 8,466  |
| 231947_at   | MYCT1           | myc target 1                                                                          | 3,694  | 8,129  |
| 231952_at   |                 |                                                                                       | 1,719  | 4,527  |
| 231963_at   | ANKRD33B        | ankyrin repeat domain 33B                                                             | -1,639 | 3,097  |
| 231966_at   | PPP1R9A         | protein phosphatase 1 regulatory subunit 9A                                           | 2,239  | 3,432  |
| 231974_at   | KMT2D           | lysine methyltransferase 2D                                                           | -0,976 | 2,669  |
| 231985_at   | MICAL3          | microtubule associated monooxygenase, calponin and LIM domain containing 3            | 1,052  | 3,488  |
| 231998_at   | SART1           | squamous cell carcinoma antigen recognized by T-cells 1                               | 2,218  | 4,464  |
| 232014_at   | ZNF30           | zinc finger protein 30                                                                | 2,131  | 4,676  |
| 232029_at   | ZNF451          | zinc finger protein 451                                                               | 1,099  | 3,903  |
| 232034_at   | LINC00537       | long intergenic non-protein coding RNA 537                                            | -2,414 | 2,497  |
| 232058_at   |                 |                                                                                       | -2,024 | 3,224  |
| 232068_s_at | TLR4            | toll like receptor 4                                                                  | -4,751 | 5,043  |
| 232095_at   |                 |                                                                                       | -1,462 | 2,963  |
| 232109_at   | UBXN10          | UBX domain protein 10                                                                 | 4,081  | 11,145 |
| 232127_at   | CLCN5           | chloride voltage-gated channel 5                                                      | 2,969  | 6,681  |
| 232128_s_at | CLCN5           | chloride voltage-gated channel 5                                                      | 2,18   | 5,275  |
| 232138_at   | MBNL2           | muscleblind like splicing regulator 2                                                 | 2,103  | 2,707  |
| 232160_s_at | TNIP2           | TNFAIP3 interacting protein 2                                                         | -1,118 | 4,744  |

|             |                 |                                                                                       |        |        |
|-------------|-----------------|---------------------------------------------------------------------------------------|--------|--------|
| 232161_x_at | PTPN4           | protein tyrosine phosphatase, non-receptor type 4                                     | 0,928  | 2,635  |
| 232175_at   | ARF1            | ADP ribosylation factor 1                                                             | -1,737 | 2,519  |
| 232218_at   |                 |                                                                                       | 1,741  | 4,228  |
| 232227_at   | HSPC324         | uncharacterized LOC101928612                                                          | 1,159  | 3,761  |
| 232228_at   | ZNF530          | zinc finger protein 530                                                               | 0,737  | 2,716  |
| 232231_at   | RUNX2           | runt related transcription factor 2                                                   | -2,674 | 2,936  |
| 232243_at   | MCPH1           | microcephalin 1                                                                       | 0,746  | 3,479  |
| 232289_at   | LOC100996843/// | ATP-sensitive inward rectifier potassium channel 12-like///potassium voltage-gated ch | 2,622  | 7,276  |
| 232306_at   | CDH26           | cadherin 26                                                                           | -2,296 | 4,209  |
| 232346_at   | LOC388692       | uncharacterized LOC388692                                                             | -1,113 | 2,519  |
| 232369_at   |                 |                                                                                       | 2,115  | 3,072  |
| 232370_at   |                 |                                                                                       | 1,905  | 6,702  |
| 232396_at   |                 |                                                                                       | -1,953 | 2,658  |
| 232452_at   | GCSAML-AS1      | GCSAML antisense RNA 1                                                                | 1,103  | 3,264  |
| 232472_at   |                 |                                                                                       | -1,712 | 2,523  |
| 232488_at   | PHYKPL          | 5-phosphohydroxy-L-lysine phospho-lyase                                               | -1,954 | 3,583  |
| 232500_at   | RALGAP2         | Ral GTPase activating protein catalytic alpha subunit 2                               | -1,833 | 3,249  |
| 232504_at   | MIR146A         | microRNA 146a                                                                         | 0,902  | 3,498  |
| 232528_at   |                 |                                                                                       | 1,858  | 2,923  |
| 232531_at   | EMX2OS          | EMX2 opposite strand/antisense RNA                                                    | 1,101  | 2,924  |
| 232543_x_at | ARHGAP9         | Rho GTPase activating protein 9                                                       | -4,066 | 4,329  |
| 232553_at   | PCYT1B          | phosphate cytidylyltransferase 1, choline, beta                                       | 2,5    | 8,663  |
| 232556_at   |                 |                                                                                       | -1,671 | 2,884  |
| 232564_at   | SLC9A5          | solute carrier family 9 member A5                                                     | 0,966  | 4,326  |
| 232591_s_at | TMEM30A         | transmembrane protein 30A                                                             | -1,477 | 2,575  |
| 232615_at   |                 |                                                                                       | -1,643 | 4,114  |
| 232617_at   | CTSS            | cathepsin S                                                                           | -4,951 | 3,155  |
| 232628_at   |                 |                                                                                       | 2,27   | 4,584  |
| 232670_at   | LOC149401       | uncharacterized LOC149401                                                             | -1,106 | 2,455  |
| 232672_x_at | CTXN2///SLC24A5 | cortixin 2///solute carrier family 24 member 5                                        | 1,7    | 3,201  |
| 232679_at   |                 |                                                                                       | 0,875  | 2,492  |
| 232757_at   |                 |                                                                                       | 2,056  | 5,628  |
| 232840_at   |                 |                                                                                       | -1,69  | 3,671  |
| 232843_s_at | DOCK8           | dedicator of cytokinesis 8                                                            | -2,658 | 3,094  |
| 232876_at   |                 |                                                                                       | -2,77  | 2,648  |
| 232881_at   | GNAS-AS1        | GNAS antisense RNA 1                                                                  | 0,98   | 2,807  |
| 232894_at   | SEC14L2         | SEC14 like lipid binding 2                                                            | 1,494  | 5,311  |
| 232895_s_at | SEC14L2         | SEC14 like lipid binding 2                                                            | 1,518  | 5,743  |
| 232916_at   |                 |                                                                                       | -0,726 | 2,481  |
| 232919_at   | AFG3L2          | AFG3 like matrix AAA peptidase subunit 2                                              | 1,193  | 2,944  |
| 232927_at   |                 |                                                                                       | -1,405 | 2,503  |
| 232932_at   |                 |                                                                                       | 2,878  | 4,757  |
| 232934_at   |                 |                                                                                       | 1,191  | 2,962  |
| 232946_s_at | NADSYN1         | NAD synthetase 1                                                                      | -1,391 | 3,515  |
| 232951_at   |                 |                                                                                       | -2,709 | 2,602  |
| 232960_at   | NUP62CL         | nucleoporin 62 C-terminal like                                                        | 3,778  | 9,068  |
| 232962_x_at |                 |                                                                                       | 0,782  | 2,682  |
| 232968_at   | FANK1           | fibronectin type III and ankyrin repeat domains 1                                     | 1,74   | 3,358  |
| 232976_at   | SNORD116-21///S | small nucleolar RNA, C/D box 116-21///small nucleolar RNA, C/D box 116-20///small n   | 3,276  | 5,073  |
| 232997_at   |                 |                                                                                       | 3,588  | 9,113  |
| 233004_x_at |                 |                                                                                       | 1,032  | 2,798  |
| 233020_at   | SEC22B          | SEC22 homolog B, vesicle trafficking protein (gene/pseudogene)                        | -1,02  | 2,806  |
| 233021_at   | RBM26-AS1       | RBM26 antisense RNA 1                                                                 | 0,791  | 2,849  |
| 233026_s_at | PDZD2           | PDZ domain containing 2                                                               | 0,875  | 2,62   |
| 233039_at   |                 |                                                                                       | 0,747  | 3,426  |
| 233072_at   | NTNG2           | netrin G2                                                                             | -4,792 | 4,234  |
| 233088_at   |                 |                                                                                       | -1,317 | 2,83   |
| 233102_at   |                 |                                                                                       | 1,878  | 3,008  |
| 233111_at   | PTCSC1          | papillary thyroid carcinoma susceptibility candidate 1 (non-protein coding)           | -4,157 | 4,815  |
| 233114_at   |                 |                                                                                       | -1,018 | 3,01   |
| 233123_at   | SLC40A1         | solute carrier family 40 member 1                                                     | 1,823  | 2,967  |
| 233129_at   |                 |                                                                                       | 1,305  | 5,175  |
| 233130_at   |                 |                                                                                       | 1,918  | 6,873  |
| 233137_at   |                 |                                                                                       | -2,037 | 5,424  |
| 233217_at   | HSPC102         | uncharacterized HSPC102                                                               | -4,054 | 3,152  |
| 233236_at   | TSPAN16         | tetraspanin 16                                                                        | -3,356 | 2,701  |
| 233246_at   |                 |                                                                                       | 1,988  | 2,794  |
| 233250_x_at | FOXRED2         | FAD dependent oxidoreductase domain containing 2                                      | 1,183  | 2,749  |
| 233267_at   |                 |                                                                                       | 1,035  | 2,71   |
| 233297_s_at | CCDC169-SOHLH2  | CCDC169-SOHLH2 readthrough///coiled-coil domain containing 169                        | 3,346  | 3,468  |
| 233298_at   | CCDC169         | coiled-coil domain containing 169                                                     | 1,644  | 3,764  |
| 233305_at   | NECAB1          | N-terminal EF-hand calcium binding protein 1                                          | 4,072  | 13,098 |
| 233324_at   | TRERF1          | transcriptional regulating factor 1                                                   | -2,538 | 3,25   |
| 233341_s_at | POLR1B          | RNA polymerase I subunit B                                                            | 2,28   | 2,566  |
| 233385_x_at | MIA-RAB4B///RAB | MIA-RAB4B readthrough (NMD candidate)///RAB4B, member RAS oncogene family             | -1,919 | 2,656  |
| 233393_at   |                 |                                                                                       | -3,128 | 4,101  |
| 233418_at   | LOC91450        | uncharacterized LOC91450                                                              | -1,079 | 2,636  |
| 233443_at   | PSMG4           | proteasome assembly chaperone 4                                                       | 0,904  | 3,47   |
| 233458_at   | LOC101060521/// | DNA-directed RNA polymerase III subunit RPC5///RNA polymerase III subunit E           | 1,325  | 3,572  |
| 233459_at   | POLR3E          | RNA polymerase III subunit E                                                          | 1,364  | 2,705  |
| 233465_at   |                 |                                                                                       | 2,106  | 3,814  |
| 233503_at   | CCDC169         | coiled-coil domain containing 169                                                     | 0,728  | 2,999  |
| 233510_s_at | PARVG           | parvin gamma                                                                          | -2,985 | 10,644 |
| 233522_at   | MEF2C-AS1       | MEF2C antisense RNA 1                                                                 | 1,289  | 2,997  |
| 233538_s_at | CYBB            | cytochrome b-245 beta chain                                                           | -1,367 | 2,927  |
| 233539_at   | NAPEPLD         | N-acyl phosphatidylethanolamine phospholipase D                                       | 1,53   | 2,49   |
| 233542_at   |                 |                                                                                       | 0,673  | 2,505  |
| 233559_s_at | WDFY1           | WD repeat and FYVE domain containing 1                                                | -1,607 | 2,914  |
| 233575_s_at | TLE4            | transducin like enhancer of split 4                                                   | -3,711 | 5,536  |
| 233613_x_at | REXO2           | RNA exonuclease 2                                                                     | 4,04   | 4,264  |
| 233621_s_at | ARHGEF12        | Rho guanine nucleotide exchange factor 12                                             | 3,597  | 8,448  |
| 233638_s_at | POMGNT1         | protein O-linked mannose N-acetylglucosaminyltransferase 1 (beta 1,2-)                | 1,459  | 2,996  |
| 233706_at   |                 |                                                                                       | 0,776  | 2,704  |
| 233729_at   |                 |                                                                                       | 1,826  | 5,878  |
| 233732_at   | LOC401320       | uncharacterized LOC401320                                                             | -1,815 | 3,364  |
| 233767_at   | HHLA1           | HERV-H LTR-associating 1                                                              | -0,824 | 2,623  |
| 233790_at   |                 |                                                                                       | -0,736 | 2,574  |
| 233798_at   |                 |                                                                                       | 1,158  | 2,467  |
| 233830_at   | LOC90246        | uncharacterized LOC90246                                                              | 1,766  | 4,158  |
| 233835_at   | LOC90246        | uncharacterized LOC90246                                                              | 0,954  | 4,434  |
| 233910_at   | TMEFF2          | transmembrane protein with EGF like and two follistatin like domains 2                | 1,997  | 8,94   |
| 233927_at   |                 |                                                                                       | -1,506 | 2,595  |

|             |                |                                                                                         |        |       |
|-------------|----------------|-----------------------------------------------------------------------------------------|--------|-------|
| 233955_x_at | CXXC5          | CXXC finger protein 5                                                                   | 3,922  | 3,862 |
| 233978_at   | PTPRE          | protein tyrosine phosphatase, receptor type E                                           | -0,981 | 2,549 |
| 234030_at   |                |                                                                                         | 1,244  | 3,341 |
| 234039_at   | TANC1          | tetratricopeptide repeat, ankyrin repeat and coiled-coil containing 1                   | 1,025  | 2,659 |
| 234075_at   |                |                                                                                         | 0,713  | 2,528 |
| 234085_at   | CCDC169        | coiled-coil domain containing 169                                                       | 2,197  | 5,395 |
| 234086_at   |                |                                                                                         | 1,118  | 2,648 |
| 234131_at   |                |                                                                                         | -1,888 | 3,167 |
| 234151_at   |                |                                                                                         | -3,4   | 5,901 |
| 234215_at   |                |                                                                                         | 1,211  | 3,412 |
| 234228_at   |                |                                                                                         | 4,387  | 4,812 |
| 234240_at   | GSN            | gelsolin                                                                                | -3,112 | 3,565 |
| 234340_at   |                |                                                                                         | -1,872 | 2,995 |
| 234357_at   |                |                                                                                         | 2,409  | 6,613 |
| 234383_x_at | ATP7B          | ATPase copper transporting beta                                                         | 1,04   | 2,536 |
| 234394_at   | ZNF124         | zinc finger protein 124                                                                 | 1,986  | 4,087 |
| 234431_at   | GSN            | gelsolin                                                                                | -3,062 | 3,334 |
| 234499_at   |                |                                                                                         | -0,688 | 2,705 |
| 234541_s_at | ARHGEF12       | Rho guanine nucleotide exchange factor 12                                               | 3,418  | 9,738 |
| 234542_at   | ARHGEF12       | Rho guanine nucleotide exchange factor 12                                               | 1,04   | 2,788 |
| 234544_at   | ARHGEF12       | Rho guanine nucleotide exchange factor 12                                               | 1,126  | 4,858 |
| 234574_at   |                |                                                                                         | -3,126 | 2,662 |
| 234580_at   | TMEM106A       | transmembrane protein 106A                                                              | -1,279 | 2,537 |
| 234597_at   |                |                                                                                         | 2,512  | 4,65  |
| 234605_at   | CDC14B         | cell division cycle 14B                                                                 | 1,395  | 3,92  |
| 234607_at   | ARRDC1         | arrestin domain containing 1                                                            | -1,211 | 2,618 |
| 234686_at   | SUGT1P1        | SGT1 homolog, MIS12 kinetochore complex assembly cochaperone pseudogene 1               | 1,174  | 3,019 |
| 234698_at   | N6AMT1         | N-6 adenine-specific DNA methyltransferase 1 (putative)                                 | 2,139  | 2,501 |
| 234799_at   | ADARB1         | adenosine deaminase, RNA specific B1                                                    | 0,967  | 3,817 |
| 234805_at   |                |                                                                                         | 0,743  | 2,45  |
| 234942_s_at | DNTTIP1        | deoxynucleotidyltransferase terminal interacting protein 1                              | -1,888 | 3,012 |
| 234968_at   | DENND4C        | DENN domain containing 4C                                                               | 1,703  | 4,087 |
| 234973_at   | SLC38A5        | solute carrier family 38 member 5                                                       | 1,017  | 2,877 |
| 234985_at   | LDLRAD3        | low density lipoprotein receptor class A domain containing 3                            | 3,626  | 3,73  |
| 235011_at   | MAP3K2         | mitogen-activated protein kinase kinase kinase 2                                        | -2,447 | 3,068 |
| 235016_at   | REEP3          | receptor accessory protein 3                                                            | -1,227 | 2,963 |
| 235030_at   | NXPE3          | neurexophilin and PC-esterase domain family member 3                                    | -2,288 | 2,451 |
| 235037_at   | TMEM41A        | transmembrane protein 41A                                                               | 2,148  | 3,347 |
| 235051_at   | CCDC50         | coiled-coil domain containing 50                                                        | 1,586  | 3,296 |
| 235052_at   | ZNF792         | zinc finger protein 792                                                                 | 2,36   | 4,167 |
| 235074_at   | SPRED1         | sprouty related EVH1 domain containing 1                                                | 0,778  | 2,607 |
| 235080_at   | CLUAP1         | clusterin associated protein 1                                                          | 1,926  | 2,647 |
| 235084_x_at | TRIM38         | tripartite motif containing 38                                                          | -1,502 | 2,974 |
| 235092_at   |                |                                                                                         | 0,909  | 2,79  |
| 235117_at   | CHAC2          | ChaC cation transport regulator homolog 2                                               | 1,806  | 3,333 |
| 235133_at   | ZDHHHC14       | zinc finger DHHC-type containing 14                                                     | 1,953  | 8,094 |
| 235141_at   | MARVELD2       | MARVEL domain containing 2                                                              | 3,497  | 9,324 |
| 235142_at   | ZBTB8A         | zinc finger and BTB domain containing 8A                                                | 2,479  | 3,743 |
| 235173_at   | MBNL1-AS1      | MBNL1 antisense RNA 1                                                                   | -1,305 | 2,607 |
| 235192_at   | TP53RK         | TP53 regulating kinase                                                                  | 1,584  | 2,627 |
| 235217_at   | LINC01004      | long intergenic non-protein coding RNA 1004                                             | -1,618 | 4,031 |
| 235236_at   |                |                                                                                         | -3,206 | 4,181 |
| 235262_at   | ZNF585B        | zinc finger protein 585B                                                                | 1,67   | 3,21  |
| 235273_at   | DYX1C1         | dyslexia susceptibility 1 candidate 1                                                   | 2,314  | 2,845 |
| 235277_at   | AMOTL1         | angiomotin like 1                                                                       | 1,9    | 2,97  |
| 235298_at   | WDR27          | WD repeat domain 27                                                                     | 0,854  | 2,844 |
| 235301_at   | KIAA1324L      | KIAA1324 like                                                                           | 1,401  | 2,933 |
| 235306_at   | GIMAP8         | GTPase, IMAP family member 8                                                            | -3,327 | 3,458 |
| 235315_at   | TSC22D1        | TSC22 domain family member 1                                                            | 2,321  | 2,562 |
| 235326_at   | CPSF7          | cleavage and polyadenylation specific factor 7                                          | -1,979 | 3,638 |
| 235348_at   | ABHD13         | abhydrolase domain containing 13                                                        | -1,357 | 2,522 |
| 235352_at   | MR1            | major histocompatibility complex, class I-related                                       | -1,953 | 4,514 |
| 235358_at   | LOC728485      | uncharacterized LOC728485                                                               | 0,848  | 3,164 |
| 235360_at   | PLEKHM3        | pleckstrin homology domain containing M3                                                | -1,042 | 2,964 |
| 235365_at   | DFNB59         | deafness, autosomal recessive 59                                                        | 2,047  | 2,491 |
| 235413_at   | GGCX           | gamma-glutamyl carboxylase                                                              | -1,27  | 3,226 |
| 235421_at   | MAP3K8         | mitogen-activated protein kinase kinase kinase 8                                        | -2,817 | 3,937 |
| 235422_at   |                |                                                                                         | -2,02  | 3,478 |
| 235438_at   | CYP7B1         | cytochrome P450 family 7 subfamily B member 1                                           | 2,469  | 8,492 |
| 235439_at   | RBMS2          | RNA binding motif single stranded interacting protein 2                                 | -1,116 | 2,706 |
| 235461_at   | TET2           | tet methylcytosine dioxygenase 2                                                        | -1,702 | 3,178 |
| 235530_at   |                |                                                                                         | -1,853 | 3,021 |
| 235538_at   |                |                                                                                         | 2,324  | 9,577 |
| 235550_at   | MAP9           | microtubule associated protein 9                                                        | 1,933  | 4,377 |
| 235554_x_at | PACRGL         | PARK2 coregulated like                                                                  | 1,863  | 2,52  |
| 235559_at   | INMT-FAM188B// | INMT-FAM188B readthrough (NMD candidate)///family with sequence similarity 188 member 1 | 0,923  | 2,965 |
| 235568_at   | MCEMP1         | mast cell expressed membrane protein 1                                                  | -7,619 | 5,91  |
| 235595_at   | ARHGEF2        | Rho/Rac guanine nucleotide exchange factor 2                                            | -1,654 | 2,71  |
| 235632_at   |                |                                                                                         | -2,911 | 4,766 |
| 235641_at   | TRIB1          | tribbles pseudokinase 1                                                                 | -4,236 | 2,99  |
| 235644_at   | CCDC138        | coiled-coil domain containing 138                                                       | 2,379  | 2,816 |
| 235648_at   | ZNF567         | zinc finger protein 567                                                                 | 1,27   | 2,902 |
| 235659_at   | TMEM127        | transmembrane protein 127                                                               | -2,254 | 2,851 |
| 235692_at   | SH3KBP1        | SH3 domain containing kinase binding protein 1                                          | -2,181 | 5,544 |
| 235694_at   | TCFL5          | transcription factor like 5                                                             | 1,477  | 2,464 |
| 235717_at   | ZNF229         | zinc finger protein 229                                                                 | 1,762  | 3,381 |
| 235719_at   | CYP4V2         | cytochrome P450 family 4 subfamily V member 2                                           | 1,335  | 3,276 |
| 235721_at   | DTX3           | deltex E3 ubiquitin ligase 3                                                            | 1,079  | 2,699 |
| 235725_at   | SMAD4          | SMAD family member 4                                                                    | 0,786  | 3,073 |
| 235739_at   |                |                                                                                         | -2,671 | 2,545 |
| 235740_at   | MCTP1          | multiple C2 and transmembrane domain containing 1                                       | -1,431 | 3,82  |
| 235753_at   | HOXA7          | homeobox A7                                                                             | 2,034  | 2,849 |
| 235759_at   |                |                                                                                         | 3,19   | 6,746 |
| 235763_at   | SLC44A5        | solute carrier family 44 member 5                                                       | 1,43   | 2,478 |
| 235765_at   | TLE4           | transducin like enhancer of split 4                                                     | -1,679 | 3,354 |
| 235766_x_at | RAB27A         | RAB27A, member RAS oncogene family                                                      | -3,835 | 5,361 |
| 235777_at   | ANKRD44        | ankyrin repeat domain 44                                                                | -2,76  | 2,534 |
| 235778_s_at | ANKRD44        | ankyrin repeat domain 44                                                                | -3,065 | 3,117 |
| 235796_at   |                |                                                                                         | -0,638 | 2,479 |
| 235798_at   | TMEM170B       | transmembrane protein 170B                                                              | -4,079 | 5,962 |
| 235810_at   | ZNF182         | zinc finger protein 182                                                                 | -0,736 | 2,484 |
| 235811_at   |                |                                                                                         | -1,116 | 2,516 |

|             |              |                                                                                             |        |       |
|-------------|--------------|---------------------------------------------------------------------------------------------|--------|-------|
| 235812_at   | CNEP1R1      | CTD nuclear envelope phosphatase 1 regulatory subunit 1                                     | -1,782 | 2,553 |
| 235816_s_at | RGL4         | ral guanine nucleotide dissociation stimulator like 4                                       | -5,9   | 7,127 |
| 235818_at   | VSTM1        | V-set and transmembrane domain containing 1                                                 | -4,516 | 4,53  |
| 235824_at   |              |                                                                                             | 4,011  | 6,567 |
| 235828_at   | PRELID2      | PRELI domain containing 2                                                                   | 1,191  | 2,553 |
| 235831_at   |              |                                                                                             | 1,151  | 6,049 |
| 235843_at   |              |                                                                                             | -2,384 | 4,461 |
| 235852_at   | STON2        | stonin 2                                                                                    | 4,519  | 7,072 |
| 235901_at   |              |                                                                                             | -1,688 | 2,743 |
| 235916_at   | YPEL4        | yippee like 4                                                                               | 1,074  | 4,515 |
| 235920_at   | CLUHP3       | zinc finger protein 720                                                                     | 1,474  | 5,117 |
| 235942_at   | FAM224A      | family with sequence similarity 224 member A (non-protein coding)                           | 0,928  | 3,102 |
| 235954_at   |              |                                                                                             | -2,311 | 5,374 |
| 235955_at   | MARVELD2     | MARVEL domain containing 2                                                                  | 3,689  | 5,491 |
| 235956_at   | CEP126       | centrosomal protein 126                                                                     | 0,874  | 3,635 |
| 235961_at   | GPR161       | G protein-coupled receptor 161                                                              | 0,903  | 2,509 |
| 236002_at   |              |                                                                                             | -1,562 | 4,541 |
| 236021_at   |              |                                                                                             | 0,602  | 2,549 |
| 236022_at   | MYO19        | myosin XIX                                                                                  | 1,781  | 3,61  |
| 236031_x_at | FREM1        | FRAS1 related extracellular matrix 1                                                        | 1,333  | 6,029 |
| 236044_at   | PLPP4        | phospholipid phosphatase 4                                                                  | 1,365  | 4,732 |
| 236047_at   | XKR6         | XK related 6                                                                                | 1,285  | 5,04  |
| 236081_at   | SNCA         | synuclein alpha                                                                             | 2,778  | 4,104 |
| 236092_at   |              |                                                                                             | 0,723  | 3,131 |
| 236108_at   | EPG5         | ectopic P-granules autophagy protein 5 homolog                                              | -1,34  | 3,265 |
| 236126_at   | ACVR2B       | activin A receptor type 2B                                                                  | 1,561  | 7,202 |
| 236129_at   | GALNT5       | polypeptide N-acetylgalactosaminyltransferase 5                                             | 1,448  | 4,01  |
| 236166_at   | LOC285147    | uncharacterized LOC285147                                                                   | -2,55  | 2,634 |
| 236172_at   | LTB4R        | leukotriene B4 receptor                                                                     | -4,652 | 3,674 |
| 236174_at   |              |                                                                                             | 1,031  | 2,532 |
| 236183_at   | DYNC1H1      | dynein cytoplasmic 1 heavy chain 1                                                          | 0,741  | 2,807 |
| 236198_at   | LINC01215    | long intergenic non-protein coding RNA 1215                                                 | 1,217  | 3,438 |
| 236201_at   | SPTLC3       | serine palmitoyltransferase long chain base subunit 3                                       | 1,256  | 5,37  |
| 236210_at   |              |                                                                                             | 2,696  | 2,487 |
| 236220_at   | SLC16A10     | solute carrier family 16 member 10                                                          | 1,536  | 5,088 |
| 236221_at   | AP4B1        | adaptor related protein complex 4 beta 1 subunit                                            | -1,148 | 2,776 |
| 236232_at   | LOC101928762 | uncharacterized LOC101928762                                                                | -1,675 | 2,616 |
| 236266_at   | RORA         | RAR related orphan receptor A                                                               | 0,854  | 2,554 |
| 236288_at   | RNF34        | ring finger protein 34                                                                      | -1,376 | 2,878 |
| 236295_s_at | NLRC3        | NLR family CARD domain containing 3                                                         | 2,959  | 2,997 |
| 236305_at   | RFESD        | Rieske Fe-S domain containing                                                               | 4,236  | 7,16  |
| 236325_at   | CEP126       | centrosomal protein 126                                                                     | 1,288  | 3,177 |
| 236336_at   | BOLA3-AS1    | BOLA3 antisense RNA 1 (head to head)                                                        | 2,246  | 6,059 |
| 236337_at   | SYCP2L       | synaptonemal complex protein 2 like                                                         | 1,4    | 4,127 |
| 236338_at   |              |                                                                                             | -3,462 | 7,193 |
| 236351_at   | DPP10-AS1    | DPP10 antisense RNA 1                                                                       | 1,746  | 5,169 |
| 236393_at   |              |                                                                                             | 1,598  | 5,182 |
| 236398_s_at | LOC101927851 | uncharacterized LOC101927851                                                                | -3,714 | 2,798 |
| 236404_at   |              |                                                                                             | -2,389 | 3,196 |
| 236450_at   |              |                                                                                             | 0,832  | 3,027 |
| 236451_at   | LOC100996579 | uncharacterized LOC100996579                                                                | 2,286  | 3,674 |
| 236490_at   | NEDD4L       | neural precursor cell expressed, developmentally down-regulated 4-like, E3 ubiquitin ligase | 1,35   | 3,907 |
| 236493_at   | NKAPP1       | NFKB activating protein pseudogene 1                                                        | 1,322  | 2,582 |
| 236522_at   |              |                                                                                             | 1,886  | 6,416 |
| 236525_at   | FBXO36       | F-box protein 36                                                                            | 1,429  | 3,771 |
| 236528_at   |              |                                                                                             | -1,7   | 3,014 |
| 236551_at   | ZNF311       | zinc finger protein 311                                                                     | 2,196  | 3,239 |
| 236561_at   | TGFBR1       | transforming growth factor beta receptor 1                                                  | -2,156 | 2,843 |
| 236599_at   |              |                                                                                             | 1,756  | 6,374 |
| 236611_at   | LOC101928000 | uncharacterized LOC101928000                                                                | 1,889  | 3,064 |
| 236612_at   |              |                                                                                             | 1,823  | 3,16  |
| 236620_at   | RIF1         | replication timing regulatory factor 1                                                      | 1,917  | 4,791 |
| 236635_at   | ZNF667       | zinc finger protein 667                                                                     | 2,957  | 4,562 |
| 236652_at   | LOC149703    | uncharacterized LOC149703                                                                   | 0,701  | 2,607 |
| 236660_at   |              |                                                                                             | -2,318 | 2,937 |
| 236678_at   |              |                                                                                             | -2,703 | 4,19  |
| 236684_at   | CNOT9        | CCR4-NOT transcription complex subunit 9                                                    | 0,684  | 2,767 |
| 236702_at   | RTFDC1       | replication termination factor 2 domain containing 1                                        | -1,916 | 2,579 |
| 236704_at   | LOC101929787 | uncharacterized LOC101929787                                                                | -1,373 | 2,571 |
| 236707_at   | DAPP1        | dual adaptor of phosphotyrosine and 3-phosphoinositides 1                                   | -3,281 | 3,241 |
| 236738_at   | C3orf80      | chromosome 3 open reading frame 80                                                          | 3,247  | 3,129 |
| 236760_at   | AMMECR1      | Alport syndrome, mental retardation, midface hypoplasia and elliptocytosis chromosome 1     | 2,911  | 5,956 |
| 236766_at   |              |                                                                                             | 2,387  | 4,586 |
| 236769_at   | LOC158402    | uncharacterized LOC158402                                                                   | 1,696  | 2,568 |
| 236791_at   |              |                                                                                             | 2,886  | 6,304 |
| 236793_at   |              |                                                                                             | 2,815  | 8,314 |
| 236802_at   |              |                                                                                             | -1,896 | 2,466 |
| 236817_at   | ADAT2        | adenosine deaminase, tRNA specific 2                                                        | 2,313  | 3,818 |
| 236821_at   |              |                                                                                             | -1,609 | 4,118 |
| 236831_at   | CCDC50       | coiled-coil domain containing 50                                                            | 2,052  | 3,39  |
| 236869_at   |              |                                                                                             | -2,268 | 2,784 |
| 236921_at   |              |                                                                                             | -3,528 | 3,537 |
| 236923_x_at |              |                                                                                             | 1,158  | 2,666 |
| 236981_at   | C17orf99     | chromosome 17 open reading frame 99                                                         | 3,078  | 2,604 |
| 237030_at   | ACPP         | acid phosphatase, prostate                                                                  | -4,638 | 7,763 |
| 237034_at   |              |                                                                                             | 1,077  | 4,872 |
| 237077_at   |              |                                                                                             | -2,804 | 2,648 |
| 237118_at   |              |                                                                                             | -1,728 | 3,096 |
| 237119_at   |              |                                                                                             | -2,774 | 5,037 |
| 237124_at   |              |                                                                                             | 0,871  | 3,173 |
| 237137_at   | SCARNA2      | small Cajal body-specific RNA 2                                                             | 1,094  | 2,687 |
| 237141_x_at |              |                                                                                             | -2,754 | 3,12  |
| 237148_at   |              |                                                                                             | 1,875  | 4,573 |
| 237168_at   | NEK5         | NIMA related kinase 5                                                                       | 1,331  | 4,589 |
| 237172_at   |              |                                                                                             | 0,853  | 3,208 |
| 237173_at   | LOC100132057 | phosphodiesterase 4D interacting protein pseudogene                                         | -1,862 | 3,45  |
| 237175_at   |              |                                                                                             | -2,488 | 3,624 |
| 237176_at   |              |                                                                                             | -3,064 | 2,664 |
| 237189_at   | HOXB-AS1     | HOXB cluster antisense RNA 1                                                                | 2,009  | 3,173 |
| 237214_at   | TFRC         | transferrin receptor                                                                        | 3,259  | 7,981 |
| 237215_s_at | TFRC         | transferrin receptor                                                                        | 3,734  | 4,953 |
| 237243_at   |              |                                                                                             | 1,16   | 2,764 |

|             |                 |                                                                                     |        |        |
|-------------|-----------------|-------------------------------------------------------------------------------------|--------|--------|
| 237325_at   | DRICH1          | aspartate rich 1                                                                    | -1,637 | 2,697  |
| 237336_at   | ADD2            | adducin 2                                                                           | 2,589  | 6,544  |
| 237340_at   | SLC26A8         | solute carrier family 26 member 8                                                   | -5,128 | 6,509  |
| 237359_at   |                 |                                                                                     | 0,913  | 2,571  |
| 237371_at   |                 |                                                                                     | -1,494 | 4,105  |
| 237396_at   |                 |                                                                                     | -1,811 | 2,529  |
| 237398_at   |                 |                                                                                     | 1,683  | 4,547  |
| 237403_at   | GFI1B           | growth factor independent 1B transcriptional repressor                              | 4,279  | 6,397  |
| 237426_at   | SP100           | SP100 nuclear antigen                                                               | -2,81  | 3,127  |
| 237464_at   | LOC101060386/// | putative uncharacterized SMG1-like protein///bola family member 2///SMG1, nonsen    | -0,958 | 3,279  |
| 237470_at   | DOCK7           | dedicator of cytokinesis 7                                                          | 1,313  | 3,133  |
| 237491_at   |                 |                                                                                     | 3,024  | 8,175  |
| 237511_at   |                 |                                                                                     | 1,935  | 4,892  |
| 237544_at   |                 |                                                                                     | -3,614 | 3,685  |
| 237664_at   |                 |                                                                                     | 0,794  | 2,622  |
| 237706_at   | STXBP4          | syntaxin binding protein 4                                                          | 1,275  | 3,181  |
| 237722_at   | FLI1            | Flt-1 proto-oncogene, ETS transcription factor                                      | -2,597 | 4,056  |
| 237747_at   | LOC100507281    | uncharacterized LOC100507281                                                        | -3,394 | 6,255  |
| 237762_at   |                 |                                                                                     | 3,369  | 10,448 |
| 237764_at   | LOC101928111    | uncharacterized LOC101928111                                                        | -1,276 | 2,55   |
| 237783_at   | PLAC8L1         | PLAC8 like 1                                                                        | 2,282  | 3,706  |
| 237798_at   |                 |                                                                                     | -2,681 | 3,659  |
| 237903_at   |                 |                                                                                     | 1,312  | 3,549  |
| 237912_at   |                 |                                                                                     | 2,922  | 2,555  |
| 237932_at   |                 |                                                                                     | 2,535  | 7,294  |
| 238005_s_at | SIN3A           | SIN3 transcription regulator family member A                                        | 0,669  | 2,622  |
| 238012_at   | DPP7            | dipeptidyl peptidase 7                                                              | 2,263  | 5,456  |
| 238016_s_at | LOC100507507    | uncharacterized LOC100507507                                                        | -1,489 | 2,539  |
| 238025_at   | MLKL            | mixed lineage kinase domain like                                                    | -3,606 | 5,386  |
| 238032_at   |                 |                                                                                     | 0,86   | 2,906  |
| 238050_at   | ANTXR2          | anthrax toxin receptor 2                                                            | -3,444 | 6,417  |
| 238063_at   | TMEM154         | transmembrane protein 154                                                           | -5,169 | 3,083  |
| 238082_at   |                 |                                                                                     | -1,325 | 2,668  |
| 238089_at   | MAN2C1          | mannosidase alpha class 2C member 1                                                 | -1,734 | 2,58   |
| 238100_at   | AAK1            | AP2 associated kinase 1                                                             | -1,574 | 3,816  |
| 238109_at   | ZNF782          | zinc finger protein 782                                                             | -2,174 | 3,157  |
| 238140_at   | ARV1            | ARV1 homolog, fatty acid homeostasis modulator                                      | 1,285  | 5,346  |
| 238183_at   |                 |                                                                                     | 2,674  | 3,601  |
| 238223_at   | PXK             | PX domain containing serine/threonine kinase like                                   | -1,813 | 4,494  |
| 238229_at   | TMEM67          | transmembrane protein 67                                                            | 1,064  | 4,705  |
| 238231_at   | NFYC            | nuclear transcription factor Y subunit gamma                                        | -1,402 | 2,461  |
| 238273_at   | LOC101930655/// | uncharacterized LOC101930655///chromosome 7 open reading frame 73///solute car      | 1,444  | 2,93   |
| 238309_x_at |                 |                                                                                     | 3,122  | 6,016  |
| 238318_at   |                 |                                                                                     | 1,249  | 3,287  |
| 238429_at   | TMEM71          | transmembrane protein 71                                                            | -5,884 | 5,253  |
| 238433_at   | SNX5            | sorting nexin 5                                                                     | 1,184  | 2,776  |
| 238439_at   | ANKRD22         | ankyrin repeat domain 22                                                            | -5,187 | 2,455  |
| 238442_at   | HEXIM1          | hexamethylene bisacetamide inducible 1                                              | -1,158 | 2,817  |
| 238444_at   | ZNF618          | zinc finger protein 618                                                             | 1,488  | 2,691  |
| 238452_at   | FCRLB           | Fc receptor like B                                                                  | 1,096  | 2,833  |
| 238461_at   | EIF4E3          | eukaryotic translation initiation factor 4E family member 3                         | -3,797 | 5,812  |
| 238462_at   | UBASH3B         | ubiquitin associated and SH3 domain containing B                                    | -2,787 | 5,414  |
| 238479_at   | DCUN1D5         | defective in cullin neddylation 1 domain containing 5                               | 1,614  | 3,472  |
| 238482_at   | KLF7            | Kruppel like factor 7                                                               | -2,955 | 3,263  |
| 238498_at   |                 |                                                                                     | 1,811  | 5,739  |
| 238517_at   | KLF7            | Kruppel like factor 7                                                               | -4,068 | 4,973  |
| 238519_at   | DDI2///RSC1A1   | DNA damage inducible 1 homolog 2///regulatory solute carrier protein, family 1, mem | 2,84   | 3,503  |
| 238532_at   | DPF3            | double PHD fingers 3                                                                | 1,004  | 4,123  |
| 238538_at   | ANKRD11         | ankyrin repeat domain 11                                                            | -1,157 | 2,661  |
| 238539_at   | HPS3            | HPS3, biogenesis of lysosomal organelles complex 2 subunit 1                        | -1,06  | 2,446  |
| 238540_at   | LOC101928623/// | uncharacterized LOC101928623///uncharacterized LOC401320                            | -2,174 | 3,735  |
| 238567_at   | SGPP2           | sphingosine-1-phosphate phosphatase 2                                               | 1,287  | 2,719  |
| 238573_at   | OTUD7B          | OTU deubiquitinase 7B                                                               | 1,666  | 4,154  |
| 238587_at   | UBASH3B         | ubiquitin associated and SH3 domain containing B                                    | -3,107 | 6,336  |
| 238642_at   | ANKRD13D        | ankyrin repeat domain 13D                                                           | -3,947 | 7,721  |
| 238657_at   | UBXN10          | UBX domain protein 10                                                               | 3,551  | 7,701  |
| 238659_at   | KIAA0141        | KIAA0141                                                                            | -1,46  | 2,766  |
| 238668_at   | NCKAP1L         | NCK associated protein 1 like                                                       | -1,298 | 4,108  |
| 238681_at   | GDPD1           | glycerophosphodiester phosphodiesterase domain containing 1                         | 4,519  | 13,952 |
| 238715_at   | LOC646014       | uncharacterized LOC646014                                                           | -2,879 | 3,658  |
| 238717_at   |                 |                                                                                     | 2,387  | 3,177  |
| 238752_at   | GPLD1           | glycosylphosphatidylinositol specific phospholipase D1                              | 1,514  | 3,467  |
| 238768_at   | C2orf68         | chromosome 2 open reading frame 68                                                  | -1,25  | 2,704  |
| 238792_at   | PCNX1           | pecanex homolog 1 (Drosophila)                                                      | -2,37  | 2,903  |
| 238803_at   | HECTD2          | HECT domain E3 ubiquitin protein ligase 2                                           | 0,856  | 2,751  |
| 238819_at   | ZNF347          | zinc finger protein 347                                                             | 1,386  | 2,523  |
| 238833_at   |                 |                                                                                     | 2,256  | 2,863  |
| 238882_at   |                 |                                                                                     | -2,53  | 3,309  |
| 238898_at   | FOXP4-AS1       | FOXP4 antisense RNA 1                                                               | 1,015  | 3,434  |
| 238902_at   |                 |                                                                                     | -1,178 | 2,522  |
| 238910_at   | CLUHP3          | clustered mitochondria homolog pseudogene 3                                         | 2,384  | 5,019  |
| 238927_at   |                 |                                                                                     | 0,899  | 3,308  |
| 238958_at   | UBE2E1          | ubiquitin conjugating enzyme E2 E1                                                  | 1,444  | 3,49   |
| 238966_at   | CELF4           | CUGBP, Elav-like family member 4                                                    | 0,565  | 2,53   |
| 238987_at   | B4GALT1         | beta-1,4-galactosyltransferase 1                                                    | -2,759 | 2,619  |
| 238994_at   | OTUD7B          | OTU deubiquitinase 7B                                                               | 2,124  | 5,712  |
| 239005_at   |                 |                                                                                     | -1,72  | 3,561  |
| 239019_at   | KLF12           | Kruppel like factor 12                                                              | 0,723  | 2,567  |
| 239035_at   | MTHFR           | methylenetetrahydrofolate reductase (NAD(P)H)                                       | 1,763  | 3,565  |
| 239042_at   | TSR1            | TSR1, ribosome maturation factor                                                    | 2,107  | 3,793  |
| 239056_at   | SEC22C          | SEC22 homolog C, vesicle trafficking protein                                        | 1,089  | 2,649  |
| 239066_at   |                 |                                                                                     | 1,678  | 3,389  |
| 239072_at   | EMB             | embigin                                                                             | -3,589 | 6,279  |
| 239077_at   | CSGALNACT2      | chondroitin sulfate N-acetylgalactosaminyltransferase 2                             | -2,929 | 3,016  |
| 239082_at   | FZD3            | frizzled class receptor 3                                                           | 3,195  | 5,206  |
| 239085_at   | JDP2            | Jun dimerization protein 2                                                          | -3,928 | 3,028  |
| 239098_at   | KCNRG           | potassium channel regulator                                                         | -2,804 | 3,497  |
| 239100_x_at | PCNX1           | pecanex homolog 1 (Drosophila)                                                      | -2,44  | 3,073  |
| 239105_at   |                 |                                                                                     | -2,045 | 2,847  |
| 239129_at   |                 |                                                                                     | -2,097 | 2,635  |
| 239142_at   | RFESD           | Rieske Fe-S domain containing                                                       | 4,109  | 5,829  |
| 239147_at   | ARSK            | arylsulfatase family member K                                                       | 1,381  | 4,112  |

|             |                 |                                                                                   |        |        |
|-------------|-----------------|-----------------------------------------------------------------------------------|--------|--------|
| 239155_at   | CXADR           | coxsackie virus and adenovirus receptor                                           | 4,458  | 13,456 |
| 239170_at   | ACTR3           | ARP3 actin related protein 3 homolog                                              | -1,908 | 2,507  |
| 239175_at   |                 |                                                                                   | -1,434 | 3,913  |
| 239179_at   |                 |                                                                                   | -2,308 | 2,463  |
| 239187_at   | DCAF16          | DDB1 and CUL4 associated factor 16                                                | 0,878  | 2,491  |
| 239188_at   | PPP2R3C         | protein phosphatase 2 regulatory subunit B"gamma                                  | -2,131 | 2,769  |
| 239206_at   | CR1L            | complement component 3b/4b receptor 1-like                                        | 2,244  | 3,956  |
| 239209_at   |                 |                                                                                   | 0,791  | 2,767  |
| 239210_at   | LOC102724387    | uncharacterized LOC102724387                                                      | 2,294  | 8,089  |
| 239213_at   | SERPINB1        | serpin family B member 1                                                          | -2,611 | 7,113  |
| 239232_at   | MSI2            | musashi RNA binding protein 2                                                     | 1,272  | 4,354  |
| 239267_at   | NEK6            | NIMA related kinase 6                                                             | -1,087 | 2,591  |
| 239284_at   |                 |                                                                                   | 0,882  | 2,492  |
| 239288_at   | TNIK            | TRAF2 and NCK interacting kinase                                                  | 3,853  | 3,869  |
| 239294_at   | PIK3CG          | phosphatidylinositol-4,5-bisphosphate 3-kinase catalytic subunit gamma            | -2,89  | 5,192  |
| 239313_at   | LOC101928623/// | uncharacterized LOC101928623///uncharacterized LOC401320                          | -2,035 | 3,282  |
| 239327_at   |                 |                                                                                   | 1,757  | 4,224  |
| 239328_at   | RCSD1           | RCSD domain containing 1                                                          | -3,96  | 6,252  |
| 239343_at   | LOC728705///TMI | uncharacterized LOC728705///transmembrane protein 263                             | 1,615  | 4,962  |
| 239366_at   |                 |                                                                                   | 1,219  | 2,78   |
| 239370_at   | UNC01133        | long intergenic non-protein coding RNA 1133                                       | 3,103  | 8,727  |
| 239379_at   |                 |                                                                                   | -2,636 | 2,749  |
| 239382_at   | HPS1            | HPS1, biogenesis of lysosomal organelles complex 3 subunit 1                      | -0,936 | 3,315  |
| 239412_at   | IRF5            | interferon regulatory factor 5                                                    | -1,786 | 4,384  |
| 239449_at   |                 |                                                                                   | 2,199  | 7,788  |
| 239451_at   |                 |                                                                                   | 2,694  | 2,665  |
| 239453_at   |                 |                                                                                   | -1,576 | 2,467  |
| 239466_at   | DUBR            | DPPA2 upstream binding RNA                                                        | 2,421  | 2,483  |
| 239479_x_at |                 |                                                                                   | 2,048  | 9,79   |
| 239491_at   | CER55           | ceramide synthase 5                                                               | -1,039 | 3,211  |
| 239492_at   | SEC14L4         | SEC14 like lipid binding 4                                                        | 1,759  | 3,953  |
| 239505_at   |                 |                                                                                   | -1,66  | 2,508  |
| 239530_at   | ADD2            | adducin 2                                                                         | 2,367  | 5,935  |
| 239546_at   | LOC100131053    | uncharacterized LOC100131053                                                      | -0,844 | 2,579  |
| 239580_at   | GUCY1A3         | guanylate cyclase 1 soluble subunit alpha                                         | 2,414  | 4,122  |
| 239598_s_at | LPCAT2          | lysophosphatidylcholine acyltransferase 2                                         | -4,013 | 10,396 |
| 239616_at   | REXO2           | RNA exonuclease 2                                                                 | 3,207  | 5,975  |
| 239617_at   | GHRLOS          | ghrelin opposite strand/antisense RNA                                             | -1,234 | 2,557  |
| 239624_at   | LOC102724689    | uncharacterized LOC102724689                                                      | 1,575  | 6,523  |
| 239629_at   | CFLAR           | CASP8 and FADD like apoptosis regulator                                           | -4,214 | 5,101  |
| 239640_at   | LOC101928623/// | uncharacterized LOC101928623///uncharacterized LOC401320                          | -1,398 | 2,643  |
| 239701_at   |                 |                                                                                   | -2,708 | 3,7    |
| 239711_at   | ADAL            | adenosine deaminase like                                                          | 1,362  | 2,647  |
| 239723_at   |                 |                                                                                   | 2,484  | 3,359  |
| 239741_at   | PYGO1           | pygopus family PHD finger 1                                                       | 0,816  | 4,706  |
| 239742_at   | LOC101930415    | uncharacterized LOC101930415                                                      | 3,004  | 6,869  |
| 239759_at   |                 |                                                                                   | -3,473 | 2,937  |
| 239762_at   | LOC286437       | uncharacterized LOC286437                                                         | -1,592 | 2,543  |
| 239780_at   |                 |                                                                                   | -3,693 | 3,055  |
| 239783_at   |                 |                                                                                   | -2,6   | 3,843  |
| 239803_at   |                 |                                                                                   | -2,022 | 5,72   |
| 239809_at   |                 |                                                                                   | -2,918 | 2,823  |
| 239812_s_at | IQCH            | IQ motif containing H                                                             | 1,07   | 3,944  |
| 239823_at   | LOC101927841    | uncharacterized LOC101927841                                                      | 2,59   | 2,604  |
| 239830_at   |                 |                                                                                   | 1,234  | 2,466  |
| 239834_at   |                 |                                                                                   | 2,456  | 3,466  |
| 239839_at   | ZNF555          | zinc finger protein 555                                                           | 1,391  | 2,543  |
| 239846_at   | MTHFD1          | methylenetetrahydrofolate dehydrogenase, cyclohydrolase and formyltetrahydrofolat | 2,667  | 2,841  |
| 239865_at   | USP6NL          | USP6 N-terminal like                                                              | 0,882  | 2,618  |
| 239872_at   |                 |                                                                                   | 2,719  | 7,579  |
| 239885_at   |                 |                                                                                   | -4,06  | 5,168  |
| 239898_x_at | ZNF286A         | zinc finger protein 286A                                                          | 1,538  | 3,108  |
| 239913_at   | SLC10A4         | solute carrier family 10 member 4                                                 | 3,561  | 13,201 |
| 239936_at   | MIR15A//DLEU2   | microRNA 15a//deleted in lymphocytic leukemia 2 (non-protein coding)              | -1,588 | 2,816  |
| 239941_at   |                 |                                                                                   | -0,899 | 2,524  |
| 239973_at   |                 |                                                                                   | 3,093  | 3,269  |
| 239982_at   | LOC105378828    | uncharacterized LOC105378828                                                      | 1,481  | 4,092  |
| 240015_at   | PRKCQ-AS1       | PRKCQ antisense RNA 1                                                             | 1,215  | 2,452  |
| 240019_at   |                 |                                                                                   | -4,037 | 2,541  |
| 240027_at   | LIN7A           | lin-7 homolog A, crumbs cell polarity complex component                           | -4,669 | 7,987  |
| 240037_at   | ITPR1L1         | inositol 1,4,5-trisphosphate receptor interacting protein-like 1                  | 1,627  | 2,895  |
| 240063_at   | GUSBP5          | glucuronidase, beta pseudogene 5                                                  | 2,343  | 3,286  |
| 240069_at   | LOC102724880    | uncharacterized LOC102724880                                                      | 0,996  | 2,928  |
| 240090_at   |                 |                                                                                   | 0,992  | 2,515  |
| 240115_at   | LOC100286925    | uncharacterized LOC100286925                                                      | -1,572 | 3,013  |
| 240142_at   | LOC101929289    | uncharacterized LOC101929289                                                      | -2,315 | 2,51   |
| 240154_at   |                 |                                                                                   | -4,602 | 5,164  |
| 240180_at   |                 |                                                                                   | 2,81   | 5,67   |
| 240254_at   |                 |                                                                                   | 1,106  | 5,223  |
| 240288_at   | KCNRG//TRIM13   | potassium channel regulator//tripartite motif containing 13                       | -2,971 | 3,782  |
| 240310_at   | TOR1AIP1        | torsin 1A interacting protein 1                                                   | -2,039 | 5,052  |
| 240352_at   | LOC101929609    | uncharacterized LOC101929609                                                      | 0,823  | 3,034  |
| 240363_at   | ANK1            | ankyrin 1                                                                         | 2,61   | 8,458  |
| 240432_x_at | KLF7            | Kruppel like factor 7                                                             | -3,13  | 4,227  |
| 240439_at   |                 |                                                                                   | 2,428  | 3,327  |
| 240448_at   |                 |                                                                                   | 1,016  | 5,711  |
| 240468_at   |                 |                                                                                   | 2,877  | 7,575  |
| 240544_at   |                 |                                                                                   | -2,64  | 2,544  |
| 240549_at   | NRSN2-AS1       | NRSN2 antisense RNA 1                                                             | 1,632  | 2,987  |
| 240571_at   |                 |                                                                                   | -2,86  | 2,927  |
| 240597_at   |                 |                                                                                   | 2,516  | 9,285  |
| 240602_at   | HBS1L           | HBS1 like translational GTPase                                                    | 2,3    | 4,871  |
| 240606_at   |                 |                                                                                   | 0,933  | 2,699  |
| 240622_at   |                 |                                                                                   | 1,666  | 3,272  |
| 240636_at   |                 |                                                                                   | 1,755  | 2,549  |
| 240647_at   |                 |                                                                                   | -3,701 | 2,818  |
| 240665_at   |                 |                                                                                   | -2,816 | 3,301  |
| 240674_at   | JARID2          | jumonji and AT-rich interaction domain containing 2                               | 1,115  | 3,174  |
| 240677_at   | ZC3H10          | zinc finger CCCH-type containing 10                                               | -1,37  | 4,38   |
| 240735_at   | CDC42BPA        | CDC42 binding protein kinase alpha                                                | 1,905  | 6,896  |
| 240737_at   |                 |                                                                                   | -1,985 | 4,479  |
| 240747_at   | LOC102724587    | uncharacterized LOC102724587                                                      | -3,578 | 2,453  |



|             |                                                                                        |                                                                                        |        |        |
|-------------|----------------------------------------------------------------------------------------|----------------------------------------------------------------------------------------|--------|--------|
| 240785_at   |                                                                                        |                                                                                        | -1,867 | 2,906  |
| 240793_at   | TTN                                                                                    | titin                                                                                  | -3,02  | 3,358  |
| 240829_at   |                                                                                        |                                                                                        | 0,978  | 3,184  |
| 240835_at   |                                                                                        |                                                                                        | -1,455 | 2,785  |
| 240836_at   | ZNF19                                                                                  | zinc finger protein 19                                                                 | 1,015  | 2,958  |
| 240870_at   |                                                                                        |                                                                                        | -2,205 | 4,268  |
| 240912_x_at | EWSAT1                                                                                 | Ewing sarcoma associated transcript 1                                                  | 0,809  | 2,873  |
| 240941_at   |                                                                                        |                                                                                        | -2,388 | 3,043  |
| 240951_at   | RORA                                                                                   | RAR related orphan receptor A                                                          | 1,393  | 3,351  |
| 240960_at   |                                                                                        |                                                                                        | -2,471 | 3,42   |
| 240966_at   | SH3TC2                                                                                 | SH3 domain and tetratricopeptide repeats 2                                             | 1,846  | 5,127  |
| 241001_at   |                                                                                        |                                                                                        | 1,95   | 2,488  |
| 241063_at   |                                                                                        |                                                                                        | 1,412  | 2,651  |
| 241081_at   |                                                                                        |                                                                                        | 1,229  | 3,339  |
| 241090_at   |                                                                                        |                                                                                        | 2,288  | 2,563  |
| 241126_at   | LOC101929529                                                                           | uncharacterized LOC101929529                                                           | 0,756  | 3,574  |
| 241154_x_at |                                                                                        |                                                                                        | 2,948  | 6,734  |
| 241210_at   |                                                                                        |                                                                                        | 0,736  | 2,471  |
| 241292_at   |                                                                                        |                                                                                        | -1,487 | 3,101  |
| 241298_x_at |                                                                                        |                                                                                        | 1,452  | 4,873  |
| 241300_at   |                                                                                        |                                                                                        | 2,409  | 8,836  |
| 241318_at   |                                                                                        |                                                                                        | 0,805  | 2,669  |
| 241328_at   | ZMAT1                                                                                  | zinc finger matrin-type 1                                                              | -1,301 | 2,82   |
| 241335_at   |                                                                                        |                                                                                        | 0,75   | 2,559  |
| 241346_at   | ARHGAP30                                                                               | Rho GTPase activating protein 30                                                       | -3,737 | 3,554  |
| 241353_s_at | LOC100507507                                                                           | uncharacterized LOC100507507                                                           | -3,405 | 7,754  |
| 241396_at   | NEDD4L                                                                                 | neural precursor cell expressed, developmentally down-regulated 4-like, E3 ubiquitin f | 1,714  | 4,857  |
| 241416_at   | LOC101928806                                                                           | uncharacterized LOC101928806                                                           | 1,626  | 5,597  |
| 241417_at   |                                                                                        |                                                                                        | 1,043  | 2,65   |
| 241441_at   |                                                                                        |                                                                                        | -3,901 | 3,267  |
| 241453_at   | PTK2                                                                                   | protein tyrosine kinase 2                                                              | 1,272  | 4,944  |
| 241462_at   |                                                                                        |                                                                                        | -1,034 | 2,446  |
| 241474_at   |                                                                                        |                                                                                        | -3,321 | 2,686  |
| 241548_at   |                                                                                        |                                                                                        | -3,492 | 5,204  |
| 241557_x_at |                                                                                        |                                                                                        | 0,904  | 2,922  |
| 241564_at   | GLOD5                                                                                  | glyoxalase domain containing 5                                                         | 4,369  | 6,165  |
| 241600_at   | WIPF3                                                                                  | WAS/WASL interacting protein family member 3                                           | 3,24   | 5,258  |
| 241601_at   | WIPF3                                                                                  | WAS/WASL interacting protein family member 3                                           | 3,319  | 5,605  |
| 241614_at   |                                                                                        |                                                                                        | -3,891 | 4,384  |
| 241619_at   | CALM3///CALM2/                                                                         | calmodulin 3///calmodulin 2///calmodulin 1                                             | -3,078 | 3,488  |
| 241652_x_at | LIN7A                                                                                  | lin-7 homolog A, crumbs cell polarity complex component                                | -4,719 | 9,668  |
| 241668_s_at | LOC101928728                                                                           | uncharacterized LOC101928728                                                           | 0,765  | 2,805  |
| 241701_at   | ARHGAP21                                                                               | Rho GTPase activating protein 21                                                       | 2,554  | 2,615  |
| 241703_at   | RUNDC3B                                                                                | RUN domain containing 3B                                                               | -2,054 | 2,954  |
| 241710_at   | C1GALT1C1L                                                                             | C1GALT1-specific chaperone 1 like                                                      | 1,259  | 3,168  |
| 241722_x_at |                                                                                        |                                                                                        | -3,322 | 3,316  |
| 241731_x_at | ZNF440                                                                                 | zinc finger protein 440                                                                | 1,29   | 4,42   |
| 241742_at   | PRAM1                                                                                  | PML-RARA regulated adaptor molecule 1                                                  | -5,083 | 9,613  |
| 241750_x_at |                                                                                        |                                                                                        | 1,805  | 2,875  |
| 241768_at   |                                                                                        |                                                                                        | 1,661  | 3,665  |
| 241778_at   | NT5C2                                                                                  | 5'-nucleotidase, cytosolic II                                                          | -1,468 | 2,442  |
| 241797_at   |                                                                                        |                                                                                        | 2,642  | 4,583  |
| 241820_at   | RIF1                                                                                   | replication timing regulatory factor 1                                                 | 1,848  | 2,711  |
| 241834_at   | LOC101930404///SNORD116-28///SNORD115-26///SNORD115-13///SNORD115-7///SNORD116-22///SN |                                                                                        | 3,03   | 5,887  |
| 241843_at   | SNORA28///EIF5                                                                         | small nucleolar RNA, H/ACA box 28///eukaryotic translation initiation factor 5         | -3,093 | 3,837  |
| 241881_at   | TRIM58                                                                                 | tripartite motif containing 58                                                         | 2,893  | 5,011  |
| 241887_at   | UBE2W                                                                                  | ubiquitin conjugating enzyme E2 W (putative)                                           | -2,507 | 6,738  |
| 241891_at   |                                                                                        |                                                                                        | -3,275 | 3,014  |
| 241893_at   |                                                                                        |                                                                                        | -3,406 | 4,629  |
| 241901_at   | LOC101929988                                                                           | uncharacterized LOC101929988                                                           | 3,667  | 7,254  |
| 241929_at   |                                                                                        |                                                                                        | 4,231  | 10,284 |
| 241938_at   | QKI                                                                                    | QKI, KH domain containing RNA binding                                                  | -2,589 | 3,654  |
| 241954_at   | FDFT1                                                                                  | farnesyl-diphosphate farnesyltransferase 1                                             | -1,117 | 2,705  |
| 241966_at   | MYO5A                                                                                  | myosin VA                                                                              | -3,429 | 4,371  |
| 241967_at   |                                                                                        |                                                                                        | 1,168  | 4,978  |
| 241989_at   | GRK4                                                                                   | G protein-coupled receptor kinase 4                                                    | 2,12   | 4,041  |
| 242002_at   | NKAIN2                                                                                 | Na+/K+ transporting ATPase interacting 2                                               | 2,741  | 6,256  |
| 242006_at   | LCA5                                                                                   | LCA5, lebercilin                                                                       | 3,242  | 6,641  |
| 242029_at   |                                                                                        |                                                                                        | -1,916 | 3,64   |
| 242055_at   | PSMG4                                                                                  | proteasome assembly chaperone 4                                                        | 2,557  | 6,38   |
| 242070_at   | LOC728485                                                                              | uncharacterized LOC728485                                                              | 1,855  | 3,636  |
| 242075_at   |                                                                                        |                                                                                        | -2,665 | 3,331  |
| 242116_x_at |                                                                                        |                                                                                        | 0,832  | 3,058  |
| 242122_at   |                                                                                        |                                                                                        | -1,046 | 2,554  |
| 242142_at   |                                                                                        |                                                                                        | 1,476  | 3,258  |
| 242167_at   |                                                                                        |                                                                                        | -1,518 | 2,726  |
| 242179_s_at | TSPAN16                                                                                | tetraspanin 16                                                                         | -3,939 | 3,201  |
| 242197_x_at | CD36                                                                                   | CD36 molecule                                                                          | 4,233  | 9,988  |
| 242230_at   | ATXN1                                                                                  | ataxin 1                                                                               | -2,279 | 2,732  |
| 242232_at   |                                                                                        |                                                                                        | -2,294 | 6,095  |
| 242245_at   |                                                                                        |                                                                                        | 3,317  | 3,783  |
| 242255_at   | WDR37                                                                                  | WD repeat domain 37                                                                    | -3,047 | 2,968  |
| 242260_at   | MATR3                                                                                  | matrin 3                                                                               | 2,155  | 4,05   |
| 242267_x_at | LOC105369595                                                                           | uncharacterized LOC105369595                                                           | -2,195 | 2,461  |
| 242268_at   | CELF2                                                                                  | CUGBP, Elav-like family member 2                                                       | -3,606 | 5,426  |
| 242279_at   |                                                                                        |                                                                                        | -1,568 | 2,701  |
| 242319_at   | DGKG                                                                                   | diacylglycerol kinase gamma                                                            | -2,918 | 6,714  |
| 242323_at   | PLA2G12A                                                                               | phospholipase A2 group XIIA                                                            | 3,404  | 3,198  |
| 242338_at   | TMEM64                                                                                 | transmembrane protein 64                                                               | 3,621  | 3,381  |
| 242350_s_at | ST8SIA6-AS1                                                                            | ST8SIA6 antisense RNA 1                                                                | 1,436  | 5,079  |
| 242384_at   |                                                                                        |                                                                                        | -2,78  | 2,759  |
| 242394_at   | CNKSR3                                                                                 | CNKSR family member 3                                                                  | 1,003  | 2,534  |
| 242420_at   |                                                                                        |                                                                                        | 1,75   | 3,543  |
| 242423_x_at |                                                                                        |                                                                                        | -1,8   | 2,664  |
| 242433_at   | ZBTB11                                                                                 | zinc finger and BTB domain containing 11                                               | -1,507 | 2,74   |
| 242445_at   | FGD4                                                                                   | FYVE, RhoGEF and PH domain containing 4                                                | -3,537 | 3,42   |
| 242462_at   | LINC00665                                                                              | long intergenic non-protein coding RNA 665                                             | 1,208  | 2,63   |
| 242471_at   |                                                                                        |                                                                                        | -2,729 | 3,792  |
| 242514_at   |                                                                                        |                                                                                        | 0,984  | 2,785  |
| 242531_at   | RRAGC                                                                                  | Ras related GTP binding C                                                              | -2,982 | 2,637  |
| 242546_at   | LINC01296///DUX                                                                        | long intergenic non-protein coding RNA 1296///double homeobox A pseudogene 10          | 1,353  | 3,525  |
| 242551_at   |                                                                                        |                                                                                        | 1,034  | 3,577  |

|             |              |                                                        |        |       |
|-------------|--------------|--------------------------------------------------------|--------|-------|
| 242583_at   | STON2        | stonin 2                                               | 2,727  | 6,813 |
| 242591_at   | DNAH1        | dynein axonemal heavy chain 1                          | -1,533 | 2,781 |
| 242597_at   | ZMYM2        | zinc finger MYM-type containing 2                      | 0,687  | 2,638 |
| 242623_x_at | PSMG4        | proteasome assembly chaperone 4                        | 2,756  | 9,843 |
| 242659_at   |              |                                                        | -2,335 | 2,994 |
| 242679_at   | TTN-AS1      | TTN antisense RNA 1                                    | -2,216 | 3,057 |
| 242690_at   | ATP11C       | ATPase phospholipid transporting 11C                   | 1,298  | 3,739 |
| 242714_at   | LOC101928429 | uncharacterized LOC101928429                           | -2,749 | 4,408 |
| 242732_at   |              |                                                        | 0,986  | 4,17  |
| 242736_at   |              |                                                        | 1,646  | 6,722 |
| 242738_s_at | ZFXH3        | zinc finger homeobox 3                                 | 1,52   | 2,766 |
| 242739_at   |              |                                                        | 1,256  | 3,698 |
| 242754_at   | LOC101559451 | uncharacterized LOC101559451                           | 0,988  | 3,511 |
| 242772_x_at |              |                                                        | -2,058 | 4,399 |
| 242824_at   |              |                                                        | 2,098  | 7,239 |
| 242842_at   |              |                                                        | 2,111  | 5,115 |
| 242854_x_at | DLEU2        | deleted in lymphocytic leukemia 2 (non-protein coding) | -2,135 | 3,531 |
| 242857_at   | FARP2        | FERM, ARH/RhoGEF and pleckstrin domain protein 2       | 2,06   | 2,811 |
| 242899_at   | SESN3        | sestrin 3                                              | -1,453 | 2,739 |
| 242923_at   | ZNF678       | zinc finger protein 678                                | 3,612  | 2,899 |
| 242932_at   |              |                                                        | 0,767  | 2,618 |
| 242957_at   | VWCE         | von Willebrand factor C and EGF domains                | 3,473  | 7,557 |
| 242963_at   | SGMS2        | sphingomyelin synthase 2                               | -2,598 | 3,052 |
| 242992_at   | ZNF551       | zinc finger protein 551                                | 2,302  | 2,64  |
| 243011_at   | NXPE3        | neurexophilin and PC-esterase domain family member 3   | -2,224 | 2,474 |
| 243032_at   |              |                                                        | -4,823 | 4,273 |
| 243038_at   | RBM43        | RNA binding motif protein 43                           | 1,18   | 2,53  |
| 243051_at   | CNIH4        | cornichon family AMPA receptor auxiliary protein 4     | -1,342 | 2,613 |
| 243068_at   |              |                                                        | -1,608 | 2,496 |
| 243082_at   |              |                                                        | -3,803 | 2,553 |
| 243099_at   | NFAM1        | NFAT activating protein with ITAM motif 1              | -4,651 | 4,456 |
| 243106_at   | CLEC12A      | C-type lectin domain family 12 member A                | -4,729 | 4,697 |
| 243119_at   |              |                                                        | -1,368 | 2,548 |
| 243137_at   |              |                                                        | 0,77   | 3,027 |
| 243194_at   | ZNF551       | zinc finger protein 551                                | 2,077  | 3,019 |
| 243198_at   | TEX9         | testis expressed 9                                     | 3,423  | 2,724 |
| 243209_at   | KCNQ4        | potassium voltage-gated channel subfamily Q member 4   | 2,858  | 6,759 |
| 243210_at   |              |                                                        | -1,113 | 3,258 |
| 243222_at   | ALPK1        | alpha kinase 1                                         | -2,592 | 3,064 |
| 243247_at   |              |                                                        | 2,859  | 2,985 |
| 243252_at   |              |                                                        | 1,75   | 2,791 |
| 243256_at   | MKNK1        | MAP kinase interacting serine/threonine kinase 1       | -2,113 | 2,613 |
| 243260_x_at | XKR6         | XK related 6                                           | 2,182  | 7,577 |
| 243262_at   |              |                                                        | 1,411  | 3,423 |
| 243331_at   |              |                                                        | 1,746  | 6,632 |
| 243343_at   |              |                                                        | 1,339  | 4,027 |
| 243362_s_at | LEF1-AS1     | LEF1 antisense RNA 1                                   | 1,56   | 4,328 |
| 243363_at   | LEF1-AS1     | LEF1 antisense RNA 1                                   | 1,505  | 5,839 |
| 243399_at   |              |                                                        | -1,991 | 2,49  |
| 243423_at   | TNIP1        | TNFAIP3 interacting protein 1                          | -3,134 | 4,839 |
| 243444_at   | SRD5A3       | steroid 5 alpha-reductase 3                            | 1,876  | 3,364 |
| 243458_at   |              |                                                        | -2,405 | 3,194 |
| 243475_at   | CBL          | Cbl proto-oncogene                                     | -4,527 | 7,142 |
| 243514_at   | WDFY2        | WD repeat and FYVE domain containing 2                 | -1,57  | 4,317 |
| 243534_at   | CC2D2B       | coiled-coil and C2 domain containing 2B                | -1,287 | 3,392 |
| 243574_at   |              |                                                        | 0,696  | 2,926 |
| 243579_at   | MSI2         | musashi RNA binding protein 2                          | 1,627  | 2,743 |
| 243586_at   |              |                                                        | -3,001 | 2,507 |
| 243601_at   | LOC285957    | uncharacterized LOC285957                              | -1,706 | 3,633 |
| 243606_at   | NXPE3        | neurexophilin and PC-esterase domain family member 3   | -2,569 | 3,175 |
| 243617_at   | ZNF827       | zinc finger protein 827                                | 2,956  | 4,14  |
| 243618_s_at | ZNF827       | zinc finger protein 827                                | 4,215  | 3,435 |
| 243624_at   | PIAS2        | protein inhibitor of activated STAT 2                  | 1,842  | 3,056 |
| 243641_at   |              |                                                        | 1,864  | 3,184 |
| 243658_at   |              |                                                        | -1,284 | 3,757 |
| 243662_at   | ZC3H10       | zinc finger CCCH-type containing 10                    | -1,549 | 3,328 |
| 243694_at   |              |                                                        | 1,51   | 2,839 |
| 243730_at   |              |                                                        | 2,348  | 6,957 |
| 243740_at   |              |                                                        | 1,658  | 3,911 |
| 243791_at   |              |                                                        | 1,119  | 2,746 |
| 243806_at   |              |                                                        | 5,208  | 7,451 |
| 243824_at   | LINC01410    | long intergenic non-protein coding RNA 1410            | -1,7   | 2,828 |
| 243830_at   |              |                                                        | -1,994 | 3,881 |
| 243834_at   | TNRC6A       | trinucleotide repeat containing 6A                     | 1,01   | 3,109 |
| 243855_at   |              |                                                        | 3,321  | 4,551 |
| 243877_at   |              |                                                        | -1,187 | 3,012 |
| 243911_at   |              |                                                        | -1,868 | 2,728 |
| 243928_s_at | ABCC4        | ATP binding cassette subfamily C member 4              | 1,347  | 4,744 |
| 243969_at   | SLC24A4      | solute carrier family 24 member 4                      | -3,601 | 4,125 |
| 243996_at   |              |                                                        | 1,977  | 2,78  |
| 244008_at   | PARP8        | poly(ADP-ribose) polymerase family member 8            | -3,125 | 4,091 |
| 244011_at   | PPM1K        | protein phosphatase, Mg2+/Mn2+ dependent 1K            | 1,049  | 2,98  |
| 244022_at   |              |                                                        | -1,49  | 2,506 |
| 244023_at   | SYK          | spleen associated tyrosine kinase                      | -1,582 | 4,601 |
| 244032_at   |              |                                                        | 1,478  | 4,607 |
| 244050_at   | HACD4        | 3-hydroxyacyl-CoA dehydratase 4                        | -2,004 | 2,993 |
| 244052_at   | CBR4         | carbonyl reductase 4                                   | 0,892  | 2,513 |
| 244053_at   |              |                                                        | 1,01   | 4,677 |
| 244055_at   |              |                                                        | 1,089  | 3,926 |
| 244060_at   |              |                                                        | 1,81   | 6,74  |
| 244061_at   |              |                                                        | -2,008 | 2,498 |
| 244062_at   | DAAM1        | dishevelled associated activator of morphogenesis 1    | 0,9    | 2,645 |
| 244087_at   |              |                                                        | -3,638 | 2,965 |
| 244098_at   |              |                                                        | 1,928  | 6,541 |
| 244154_at   | DDHD1        | DDHD domain containing 1                               | 2,199  | 3,986 |
| 244177_at   | ING1         | inhibitor of growth family member 1                    | -1,341 | 2,652 |
| 244181_at   |              |                                                        | -1,288 | 3,062 |
| 244213_at   |              |                                                        | 1,804  | 4,794 |
| 244229_at   | PARVG        | parvin gamma                                           | -1,107 | 3,53  |
| 244246_at   | MIPOL1       | mirror-image polydactyly 1                             | 0,758  | 2,907 |
| 244250_at   | ANXA6        | annexin A6                                             | -1,625 | 2,446 |
| 244272_s_at | TC2N         | tandem C2 domains, nuclear                             | 1,958  | 6,851 |

|             |                 |                                                                                     |        |        |
|-------------|-----------------|-------------------------------------------------------------------------------------|--------|--------|
| 244279_at   | SOBP            | sine oculis binding protein homolog                                                 | 0,807  | 2,622  |
| 244290_at   |                 |                                                                                     | 2,279  | 3,443  |
| 244338_at   |                 |                                                                                     | 1,52   | 3,269  |
| 244384_at   |                 |                                                                                     | -0,675 | 2,678  |
| 244393_x_at |                 |                                                                                     | 1,435  | 2,888  |
| 244401_at   | LCA5            | LCA5, lebercillin                                                                   | 4,144  | 5,06   |
| 244423_at   |                 |                                                                                     | -5,482 | 8,797  |
| 244439_at   | SPRED1          | sprouty related EVH1 domain containing 1                                            | 1,304  | 2,861  |
| 244470_at   |                 |                                                                                     | -2,099 | 2,647  |
| 244512_at   | HOXB-AS1        | HOXB cluster antisense RNA 1                                                        | 1,544  | 3,891  |
| 244556_at   | LCP2            | lymphocyte cytosolic protein 2                                                      | -2,64  | 2,845  |
| 244578_at   | LCP2            | lymphocyte cytosolic protein 2                                                      | -3,214 | 3,221  |
| 244592_at   |                 |                                                                                     | -2,797 | 5,204  |
| 244603_at   |                 |                                                                                     | -2,335 | 3,358  |
| 244635_s_at | SH3BGR1         | SH3 domain binding glutamate rich protein like 2                                    | 2,476  | 2,663  |
| 244646_at   |                 |                                                                                     | 0,689  | 2,844  |
| 244650_at   | FAM105A         | family with sequence similarity 105 member A                                        | -4,289 | 7,209  |
| 244654_at   | MYO1G           | myosin IG                                                                           | -2,376 | 3,375  |
| 244689_at   | PPARA           | peroxisome proliferator activated receptor alpha                                    | 1,416  | 3,919  |
| 244693_at   |                 |                                                                                     | 1,327  | 2,46   |
| 244695_at   | GHRLOS          | ghrelin opposite strand/antisense RNA                                               | -1,935 | 4,131  |
| 244699_at   | AH11            | Abelson helper integration site 1                                                   | 1,198  | 2,631  |
| 244727_at   | LOC101927338/// | uncharacterized LOC101927338///KCNQ1 opposite strand/antisense transcript 1 (non    | -1,149 | 2,449  |
| 244743_x_at | ZNF138          | zinc finger protein 138                                                             | 1,738  | 2,953  |
| 244752_at   | ZNF438          | zinc finger protein 438                                                             | -1,642 | 2,693  |
| 244756_at   | ANKRD13D        | ankyrin repeat domain 13D                                                           | -1,496 | 2,597  |
| 244771_at   | KBTBD12         | kelch repeat and BTB domain containing 12                                           | 2,162  | 8,923  |
| 244777_at   | DCP2            | decapping mRNA 2                                                                    | -1,856 | 3,731  |
| 244780_at   | SGPP2           | sphingosine-1-phosphate phosphatase 2                                               | 2,316  | 2,554  |
| 244787_at   |                 |                                                                                     | -2,81  | 3,724  |
| 244820_at   |                 |                                                                                     | 1,031  | 4,517  |
| 244825_at   | SHROOM4         | shroom family member 4                                                              | -0,962 | 2,866  |
| 244879_at   |                 |                                                                                     | 0,747  | 2,873  |
| 266_s_at    | CD24            | CD24 molecule                                                                       | -6,013 | 3,071  |
| 31874_at    | GAS2L1          | growth arrest specific 2 like 1                                                     | 4,11   | 13,339 |
| 34697_at    | LRP6            | LDL receptor related protein 6                                                      | 1,166  | 2,983  |
| 35160_at    | LDB1            | LIM domain binding 1                                                                | 1,565  | 3,353  |
| 36030_at    | IFFO1           | intermediate filament family orphan 1                                               | -1,759 | 4,73   |
| 36865_at    | ANGEL1          | angel homolog 1                                                                     | 1,506  | 3,076  |
| 36920_at    | MTM1            | myotubularin 1                                                                      | -1,056 | 3,246  |
| 37005_at    | MINOS1-NBL1///N | MINOS1-NBL1 readthrough///neuroblastoma 1, DAN family BMP antagonist                | 1,606  | 5,97   |
| 37384_at    | PPM1F           | protein phosphatase, Mg2+/Mn2+ dependent 1F                                         | -1,749 | 2,563  |
| 37965_at    | PARVB           | parvin beta                                                                         | 1,846  | 4,356  |
| 37966_at    | PARVB           | parvin beta                                                                         | 3,27   | 2,983  |
| 37986_at    | EPOR            | erythropoietin receptor                                                             | 1,849  | 3,652  |
| 38149_at    | ARHGAP25        | Rho GTPase activating protein 25                                                    | -3,418 | 3,172  |
| 38964_r_at  | WAS             | Wiskott-Aldrich syndrome                                                            | -2,821 | 4,101  |
| 39248_at    | AQP3            | aquaporin 3 (Gill blood group)                                                      | 2,718  | 2,475  |
| 39582_at    | CYLD            | CYLD lysine 63 deubiquitinase                                                       | -2,251 | 4,109  |
| 39729_at    | PRDX2           | peroxiredoxin 2                                                                     | 4,957  | 3,666  |
| 39966_at    | CSPG5           | chondroitin sulfate proteoglycan 5                                                  | 1,316  | 5,489  |
| 40420_at    | STK10           | serine/threonine kinase 10                                                          | -2,915 | 3,478  |
| 40562_at    | GNA11           | G protein subunit alpha 11                                                          | 1,263  | 3,044  |
| 40687_at    | GJA4            | gap junction protein alpha 4                                                        | 0,937  | 3,093  |
| 41220_at    | SEPT9           | septin 9                                                                            | -1,895 | 3,242  |
| 43544_at    | MED16           | mediator complex subunit 16                                                         | 1,042  | 2,948  |
| 43977_at    | TMEM161A        | transmembrane protein 161A                                                          | 1,573  | 3,09   |
| 45297_at    | EHD2            | EH domain containing 2                                                              | 1,755  | 7,893  |
| 46665_at    | SEMA4C          | semaphorin 4C                                                                       | 3,971  | 5,691  |
| 48531_at    | TNIP2           | TNFAIP3 interacting protein 2                                                       | -1,216 | 5,068  |
| 49077_at    | PPME1           | protein phosphatase methylesterase 1                                                | 0,653  | 2,683  |
| 49679_s_at  | MMP24-AS1       | MMP24 antisense RNA 1                                                               | -1,066 | 2,97   |
| 52975_at    | MVB12B          | multivesicular body subunit 12B                                                     | -3,094 | 3,316  |
| 53987_at    | RANBP10         | RAN binding protein 10                                                              | 1,438  | 3,177  |
| 54632_at    | THADA           | THADA, armadillo repeat containing                                                  | 1,333  | 2,499  |
| 55093_at    | CHPF2           | chondroitin polymerizing factor 2                                                   | -0,935 | 2,558  |
| 55692_at    | ELMO2           | engulfment and cell motility 2                                                      | -1,713 | 4,101  |
| 56919_at    | WDR48           | WD repeat domain 48                                                                 | 0,868  | 2,796  |
| 59433_at    | LOC102725263/// | uncharacterized LOC102725263///zinc finger protein 839 pseudogene                   | 1,439  | 3,51   |
| 59631_at    | TXNRD3NB///TXN  | thioredoxin reductase 3 neighbor///thioredoxin reductase 3                          | 2,06   | 2,609  |
| 60474_at    | FERMT1          | fermitin family member 1                                                            | 0,951  | 3,339  |
| 64408_s_at  | CALML4          | calmodulin like 4                                                                   | -1,55  | 3,726  |
| 64883_at    | MOSPD2          | motile sperm domain containing 2                                                    | -3,076 | 3,759  |
| 64900_at    | TMEM231         | transmembrane protein 231                                                           | 1,378  | 2,778  |
| 65521_at    | UBE2D4          | ubiquitin conjugating enzyme E2 D4 (putative)                                       | 0,748  | 3,183  |
| 65585_at    | FAM86DP///FAM   | family with sequence similarity 86, member D, pseudogene///family with sequence sir | 2,835  | 4,09   |
| 78047_s_at  | MMP24-AS1       | MMP24 antisense RNA 1                                                               | -0,988 | 2,632  |
| 90610_at    | LRCH4           | leucine rich repeats and calponin homology domain containing 4                      | -3,026 | 4,653  |
